# Supplementary material
Source: PubMed Central journal article supplement (PMC2553301)
Supplement: JCI0835875sd.pdf [file JCI0835875sd.pdf]

**Supplemental Figure 1. Original pie-chart and legend to Up-regulated GO families**

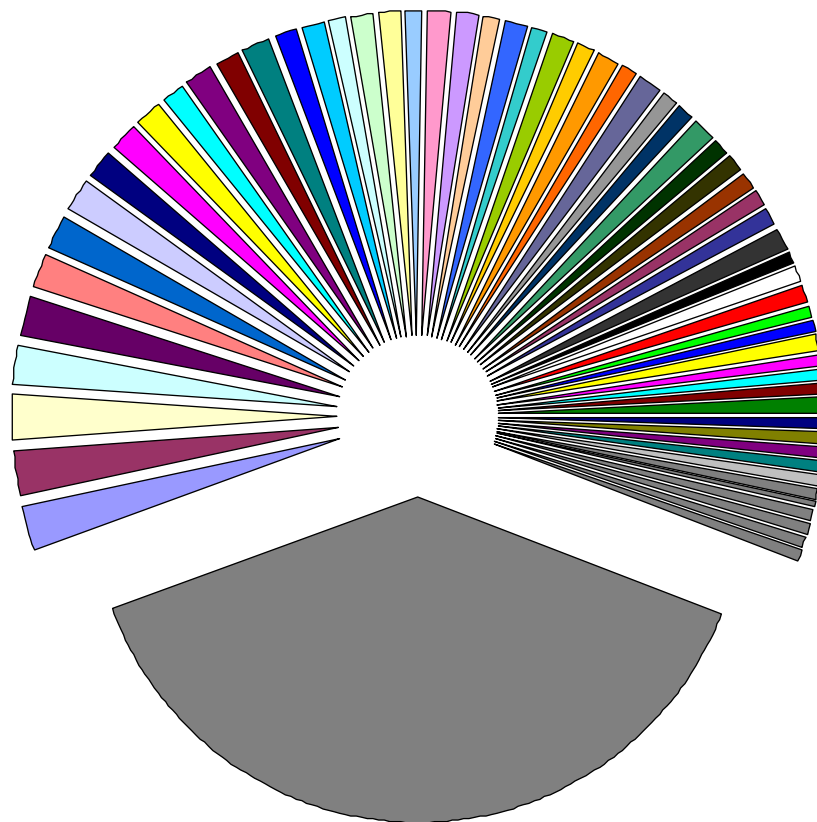

- ▣ cell organization and biogenesis
- ▣ biopolymer modification
- transferase activity
- purine nucleotide binding
- ATP binding
- intracellular non-membrane-bound organelle
- kinase activity
- organelle organization and biogenesis
- response to stress
- ▣ phosphate metabolism
- ▣ cellular localization
- ▣ phosphotransferase activity, alcohol group as acceptor
- morphogenesis
- negative regulation of biological process
- cell differentiation
- protein kinase activity
- phosphorylation
- ubiquitin cycle
- enzyme regulator activity
- negative regulation of physiological process
- protein serine/threonine kinase activity
- cell cycle
- RNA binding
- intracellular protein transport
- nervous system development
- ligase activity
- positive regulation of physiological process
- ▣ transcription from RNA polymerase II promoter
- cell motility
- locomotion
- regulation of cell cycle
- development
- ▣ protein modification
- protein complex
- ▣ adenylyl nucleotide binding
- non-membrane-bound organelle
- transferase activity, transferring phosphorus-containing groups
- transcription regulator activity
- intracellular signaling cascade
- ▣ phosphorus metabolism
- establishment of cellular localization
- intracellular transport
- protein localization
- establishment of protein localization
- cytoskeleton
- protein transport
- negative regulation of cellular process
- organ development
- negative regulation of cellular physiological process
- protein amino acid phosphorylation
- transcription factor activity
- ▣ DNA metabolism
- cytoskeleton organization and biogenesis
- system development
- cellular morphogenesis
- positive regulation of cellular process
- positive regulation of cellular physiological process
- cytoskeletal protein binding
- response to abiotic stimulus
- localization of cell
- regulation of progression through cell cycle
- other

**Supplemental Figure 2. Original pie-chart and legend to Down-regulated GO families**

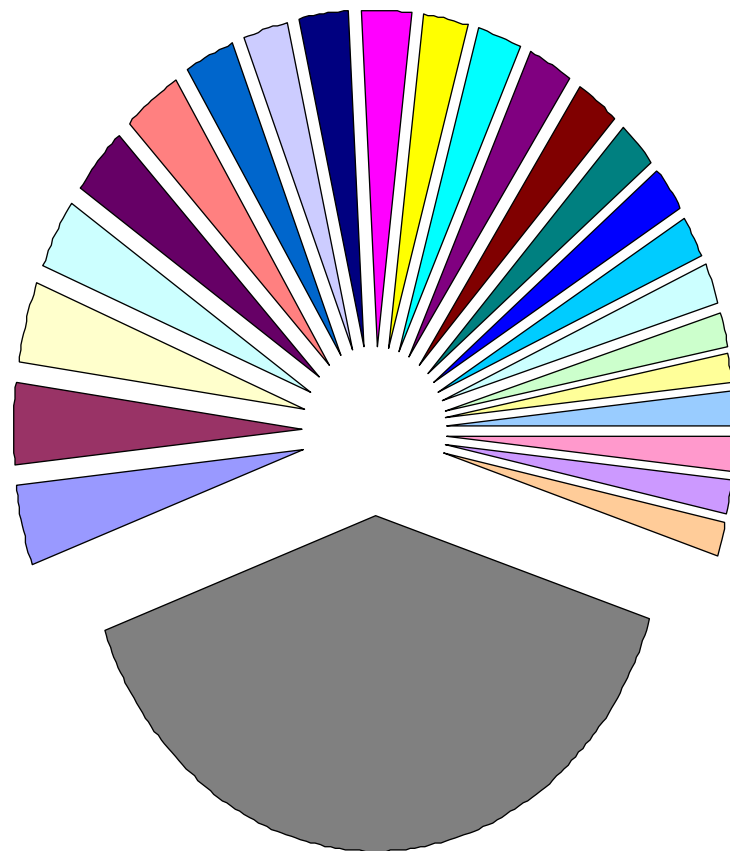

- system development
- morphogenesis
- nervous system development
- extracellular matrix (sensu Metazoa)
- organ morphogenesis
- transcription factor activity
- peptidase activity
- positive regulation of cellular process
- neuron differentiation
- angiogenesis
- blood vessel development
- enzyme linked receptor protein signaling pathway
- other
- cell differentiation
- transcription regulator activity
- cellular biosynthesis
- extracellular matrix
- calcium ion binding
- cell adhesion
- positive regulation of biological process
- macromolecule biosynthesis
- neurogenesis
- blood vessel morphogenesis
- vasculature development
- sequence-specific DNA binding

**Table 1. Up-regulated GO gene sets in co-cultured cholangiocytes**

| GO Family <sup>A</sup>                                          | Gene Count <sup>B</sup> | Percentage <sup>C</sup> | EASE Score <sup>D</sup> |
|-----------------------------------------------------------------|-------------------------|-------------------------|-------------------------|
| Cell organization and biogenesis                                | 88                      | 9.95%                   | 7.92000E-07             |
| Development                                                     | 88                      | 9.95%                   | 7.77000E-05             |
| Biopolymer modification                                         | 86                      | 9.73%                   | 5.94000E-09             |
| Protein modification                                            | 82                      | 9.28%                   | 2.39000E-08             |
| Transferase activity                                            | 73                      | 8.26%                   | 2.03398E-03             |
| Protein complex                                                 | 72                      | 8.14%                   | 1.74018E-02             |
| Purine nucleotide binding                                       | 70                      | 7.92%                   | 2.46000E-04             |
| Adenyl nucleotide binding                                       | 59                      | 6.67%                   | 3.15000E-04             |
| ATP binding                                                     | 58                      | 6.56%                   | 2.39000E-04             |
| Non-membrane-bound organelle                                    | 55                      | 6.22%                   | 6.66968E-03             |
| Intracellular non-membrane-bound organelle                      | 55                      | 6.22%                   | 6.66968E-03             |
| Transferase activity, transferring phosphorus-containing groups | 52                      | 5.88%                   | 1.53000E-04             |
| Kinase activity                                                 | 50                      | 5.66%                   | 1.94000E-05             |
| Transcription regulator activity                                | 49                      | 5.54%                   | 4.94198E-03             |
| Organelle organization and biogenesis                           | 47                      | 5.32%                   | 5.51000E-04             |
| Intracellular signaling cascade                                 | 45                      | 5.09%                   | 1.05950E-03             |
| Response to stress                                              | 44                      | 4.98%                   | 3.15927E-02             |
| Phosphorus metabolism                                           | 42                      | 4.75%                   | 6.09000E-04             |
| Phosphate metabolism                                            | 42                      | 4.75%                   | 6.09000E-04             |
| Establishment of cellular localization                          | 41                      | 4.64%                   | 1.24000E-05             |
| Cellular localization                                           | 41                      | 4.64%                   | 1.52000E-05             |
| Intracellular transport                                         | 40                      | 4.52%                   | 2.50000E-05             |
| Phosphotransferase activity, alcohol group as acceptor          | 40                      | 4.52%                   | 5.50000E-05             |
| Protein localization                                            | 40                      | 4.52%                   | 5.51000E-05             |
| Morphogenesis                                                   | 40                      | 4.52%                   | 1.09671E-02             |
| Establishment of protein localization                           | 39                      | 4.41%                   | 4.70000E-05             |
| Negative regulation of biological process                       | 39                      | 4.41%                   | 4.83000E-04             |
| Cytoskeleton                                                    | 39                      | 4.41%                   | 1.27384E-03             |
| Cell differentiation                                            | 39                      | 4.41%                   | 1.17331E-02             |
| Protein transport                                               | 38                      | 4.30%                   | 4.71000E-05             |
| Protein kinase activity                                         | 37                      | 4.19%                   | 2.62000E-05             |
| Negative regulation of cellular process                         | 37                      | 4.19%                   | 4.09000E-04             |
| Phosphorylation                                                 | 37                      | 4.19%                   | 5.42000E-04             |
| Organ development                                               | 37                      | 4.19%                   | 5.72216E-02             |
| Ubiquitin cycle                                                 | 36                      | 4.07%                   | 1.44000E-07             |
| Negative regulation of cellular physiological process           | 35                      | 3.96%                   | 8.22000E-05             |
| Enzyme regulator activity                                       | 35                      | 3.96%                   | 1.02000E-04             |
| Protein amino acid phosphorylation                              | 35                      | 3.96%                   | 1.43000E-04             |
| Negative regulation of physiological process                    | 35                      | 3.96%                   | 1.97000E-04             |
| Transcription factor activity                                   | 34                      | 3.85%                   | 4.51600E-02             |
| Protein serine/threonine kinase activity                        | 30                      | 3.39%                   | 1.42000E-04             |
| DNA metabolism                                                  | 30                      | 3.39%                   | 1.09557E-03             |
| Cell cycle                                                      | 29                      | 3.28%                   | 1.60859E-02             |
| Cytoskeleton organization and biogenesis                        | 28                      | 3.17%                   | 2.70000E-04             |
| RNA binding                                                     | 27                      | 3.05%                   | 1.15740E-03             |
| System development                                              | 27                      | 3.05%                   | 8.53358E-03             |

|                                                       |    |       |             |
|-------------------------------------------------------|----|-------|-------------|
| Intracellular protein transport                       | 25 | 2.83% | 2.16018E-03 |
| Cellular morphogenesis                                | 24 | 2.71% | 1.02468E-03 |
| Nervous system development                            | 24 | 2.71% | 1.96118E-02 |
| Positive regulation of cellular process               | 24 | 2.71% | 7.63648E-02 |
| Ligase activity                                       | 23 | 2.60% | 4.28579E-03 |
| Positive regulation of cellular physiological process | 23 | 2.60% | 5.68016E-02 |
| Positive regulation of physiological process          | 23 | 2.60% | 8.58718E-02 |
| Cytoskeletal protein binding                          | 22 | 2.49% | 3.47000E-04 |
| Transcription from RNA polymerase II promoter         | 22 | 2.49% | 1.45890E-03 |
| Response to abiotic stimulus                          | 21 | 2.38% | 7.34388E-02 |
| Cell motility                                         | 20 | 2.26% | 3.89000E-04 |
| Localization of cell                                  | 20 | 2.26% | 3.89000E-04 |
| Locomotion                                            | 20 | 2.26% | 4.67000E-04 |
| Regulation of progression through cell cycle          | 20 | 2.26% | 7.20075E-03 |
| Regulation of cell cycle                              | 20 | 2.26% | 7.43645E-03 |

<sup>A</sup> List of GO sets that have been up-regulated in co-cultured cholangiocytes compared to mono-cultures. <sup>B</sup> Absolute number of genes altered. <sup>C</sup> Percentage of genes altered within the GO family. <sup>D</sup> EASE score.

| Probe Set ID<br>Symbol | Average Expression Coculture/Average Expression Monoculture | Gene Title                                                      | Gene          |
|------------------------|-------------------------------------------------------------|-----------------------------------------------------------------|---------------|
| 1415670_at             | 0.95061                                                     | "coatomer protein complex, subunit gamma"                       | Copg          |
| 1415671_at             | 0.94545                                                     | "ATPase, H <sup>+</sup> transporting, lysosomal V0 subunit D1"  | Atp6v0d1      |
| 1415672_at             | 0.93091                                                     | "golgi autoantigen, golgin subfamily a, 7"                      | Golga7        |
| 1415673_at             | 1.02658                                                     | phosphoserine phosphatase                                       | Psph          |
| 1415674_a_at           | 1.09169                                                     | trafficking protein particle complex 4                          | Trappc4       |
| 1415675_at             | 1.05584                                                     | dolichol-phosphate (beta-D) mannosyltransferase 2               | Dpm2          |
| 1415676_a_at           | 1.06288                                                     | "proteasome (prosome, macropain) subunit, beta type 5"          | Psmb5         |
| 1415677_at             | 0.97995                                                     | dehydrogenase/reductase (SDR family) member 1                   | Dhrs1         |
| 1415678_at             | 0.95973                                                     | "protein phosphatase 1A, magnesium dependent, alpha isoform"    | Ppm1a         |
| 1415679_at             | 1.05311                                                     | presenilin enhancer 2 homolog (C. elegans)                      | Psenen        |
| 1415680_at             | 1.12135                                                     | anaphase promoting complex subunit 1                            | Anapc1        |
| 1415681_at             | 1.07250                                                     | mitochondrial ribosomal protein L43                             | Mrpl43        |
| 1415682_at             | 0.99309                                                     | exportin 7                                                      | Xpo7          |
| 1415683_at             | 1.04942                                                     | N-myristoyltransferase 1                                        | Nmt1          |
| 1415684_at             | 1.07304                                                     | autophagy-related 5 (yeast)                                     | Atg5          |
| 1415685_at             | 1.12205                                                     | mitochondrial translational initiation factor 2                 | Mtif2         |
| 1415686_at             | 0.95201                                                     | "RAB14, member RAS oncogene family"                             | Rab14         |
| 1415687_a_at           | 0.87781                                                     | prosaposin                                                      | Psap          |
| 1415688_at             | 0.85738                                                     | "ubiquitin-conjugating enzyme E2G 1 (UBC7 homolog, C. elegans)" | Ube2g1        |
| 1415689_s_at           | 0.74390                                                     | zinc finger protein 306                                         | Zfp306        |
| 1415690_at             | 1.17290                                                     | mitochondrial ribosomal protein L27                             | Mrpl27        |
| 1415691_at             | 1.07939                                                     | "discs, large homolog 1 (Drosophila)"                           | Dlgh1         |
| 1415692_s_at           | 1.10304                                                     | calnexin                                                        | Canx          |
| 1415693_at             | 1.00621                                                     | "Der1-like domain family, member 1"                             | Der1l         |
| 1415694_at             | 1.10393                                                     | tryptophanyl-tRNA synthetase                                    | Wars          |
| 1415695_at             | 1.02342                                                     | "proteasome (prosome, macropain) subunit, alpha type 1"         | Psma1         |
| 1415696_at             | 0.88722                                                     | SAR1 gene homolog A (S. cerevisiae)                             | Sar1a         |
| 1415697_at             | 1.12479                                                     | RIKEN cDNA E430034L04 gene                                      | E430034L04Rik |
| 1415698_at             | 0.96860                                                     | golgi phosphoprotein 2                                          | Golph2        |
| 1415699_a_at           | 0.97535                                                     | G protein pathway suppressor 1                                  | Gps1          |
| 1415700_a_at           | 0.98348                                                     | "signal sequence receptor, gamma"                               | Ssr3          |
| 1415701_x_at           | 1.01856                                                     | ribosomal protein L23                                           | Rpl23         |
| 1415702_a_at           | 0.87204                                                     | C-terminal binding protein 1                                    | Ctbp1         |
| 1415703_at             | 1.01601                                                     | "HECT, UBA and WWE domain containing 1"                         | Huwe1         |
| 1415704_a_at           | 1.20063                                                     | carnitine deficiency-associated gene expressed in ventricle 3   | Cdv3          |
| 1415705_at             | 0.87415                                                     | RIKEN cDNA 9130011J15 gene                                      | 9130011J15Rik |
| 1415706_at             | 0.91394                                                     | coatomer protein complex subunit alpha                          | Copa          |
| 1415707_at             | 0.98701                                                     | anaphase promoting complex subunit 2                            | Anapc2        |
| 1415708_at             | 0.95803                                                     | taurine upregulated gene 1                                      | Tug1          |
| 1415709_s_at           | 0.99431                                                     | golgi-specific brefeldin A-resistance factor 1                  | Gbf1          |

1415710\_at 1.01728 COX18 cytochrome c oxidase assembly homolog (*S. cerevisiae*) Cox18  
 1415711\_at 0.92829 ADP-ribosylation factor guanine nucleotide-exchange factor 1(brefeldin A-inhibited) Arfgef1  
 1415712\_at 0.86270 "zinc finger, RAN-binding domain containing 1" Zranb1  
 1415713\_a\_at 0.97428 DEAD (Asp-Glu-Ala-Asp) box polypeptide 24 Ddx24  
 1415714\_a\_at 1.05008 RIKEN cDNA 2610209M04 gene 2610209M04Rik  
 1415715\_at 0.94432 transmembrane protein 129 Tmem129  
 1415716\_a\_at 0.91185 ribosomal protein S27 Rps27  
 1415717\_at 0.91605 RIKEN cDNA 4931406I20 gene 4931406I20Rik  
 1415718\_at 1.00544 SAP30-like Sap30l  
 1415719\_s\_at 0.92885 armadillo repeat containing 1 Armc1  
 1415720\_s\_at 0.96774 MAD2L1 binding protein Mad2l1bp  
 1415721\_a\_at 0.95385 RIKEN cDNA 1200013P24 gene 1200013P24Rik  
 1415722\_a\_at 0.97559 RIKEN cDNA 1110059P08 gene 1110059P08Rik  
 1415723\_at 1.07928 eukaryotic translation initiation factor 5 Eif5  
 1415724\_a\_at 1.01143 cell division cycle 42 homolog (*S. cerevisiae*) Cdc42  
 1415725\_at 1.14175 RRN3 RNA polymerase I transcription factor homolog (yeast) Rrn3  
 1415726\_at 0.97237 ankyrin repeat domain 17 Ankrd17  
 1415727\_at 1.01865 apolipoprotein A-I binding protein Apoalbp  
 1415728\_at 1.19108 "poly(A) binding protein, nuclear 1" Pabpn1  
 1415729\_at 0.94445 3-phosphoinositide dependent protein kinase-1 Pdkp1  
 1415730\_at 0.99416 RIKEN cDNA 5730453I16 gene 5730453I16Rik  
 1415731\_at 0.99396 angel homolog 2 (*Drosophila*) Angel2  
 1415732\_at 0.88899 HLA-B associated transcript 5 Bat5  
 1415733\_a\_at 1.11468 RIKEN cDNA 1110019J04 gene 1110019J04Rik  
 1415734\_at 1.00006 "RAB7, member RAS oncogene family" Rab7  
 1415735\_at 1.01757 damage specific DNA binding protein 1 Ddb1  
 1415736\_at 0.98003 prefoldin 5 Pfdn5  
 1415737\_at 0.97661 riboflavin kinase Rfk  
 1415738\_at 0.88480 thioredoxin domain containing 12 (endoplasmic reticulum) Txndc12  
 1415739\_at 0.91974 RIKEN cDNA 3100004P22 gene 3100004P22Rik  
 1415740\_at 1.15203 "protease (prosome, macropain) 26S subunit, ATPase 5" Psmc5  
 1415741\_at 0.88485 transmembrane protein 165 Tmem165  
 1415742\_at 0.99604 ancient ubiquitous protein Aup1  
 1415743\_at 0.82408 histone deacetylase 5 Hdac5  
 1415744\_at 1.15763 H2-K region expressed gene 2 H2-Ke2  
 1415745\_a\_at 1.02067 Down syndrome critical region gene 3 Dscr3  
 1415746\_at 0.94838 capicua homolog (*Drosophila*) Cic  
 1415747\_s\_at 0.99108 RIO kinase 3 (yeast) Riok3  
 1415748\_a\_at 1.05675 dynactin 5 Dctn5  
 1415749\_a\_at 1.13763 Ras-related GTP binding C Rragc  
 1415750\_at 1.01870 transducin (beta)-like 3 Tbl3  
 1415751\_at 0.95825 "heterochromatin protein 1, binding protein 3" Hp1bp3



1415752\_at 0.99537 cDNA sequence BC031181 BC031181  
 1415753\_at 0.92153 "DNA segment, Chr 10, Brigham & Women's Genetics 1364 expressed"  
 D10Bwg1364e  
 1415754\_at 0.96349 polymerase (RNA) II (DNA directed) polypeptide F Polr2f  
 1415755\_a\_at 0.96021 ubiquitin-conjugating enzyme E2 variant 1 /// similar to ubiquitin-conjugating  
 enzyme E2 variant 1 Ube2v1 /// LOC666853  
 1415756\_a\_at 0.94673 SNAP-associated protein Snapap  
 1415757\_at 0.98763 golgi-specific brefeldin A-resistance factor 1 Gbf1  
 1415758\_at 0.99324 furry homolog-like (Drosophila) Fryl  
 1415759\_a\_at 1.07680 hepatitis B virus x interacting protein Hbxip  
 1415760\_s\_at 0.98276 ATX1 (antioxidant protein 1) homolog 1 (yeast) Atox1  
 1415761\_at 1.02689 mitochondrial ribosomal protein L52 Mrpl52  
 1415762\_x\_at 1.00904 mitochondrial ribosomal protein L52 Mrpl52  
 1415763\_a\_at 1.04934 --- ---  
 1415764\_at 1.07036 zinc finger CCCH type containing 11A Zc3h11a  
 1415765\_at 0.98615 heterogeneous nuclear ribonucleoprotein U-like 2 Hnrpul2  
 1415766\_at 0.92974 SEC22 vesicle trafficking protein homolog B (S. cerevisiae) Sec22b  
 1415767\_at 0.97333 YTH domain family 1 Ythdf1  
 1415768\_a\_at 0.89896 ubiquitin-conjugating enzyme E2R 2 Ube2r2  
 1415769\_at 0.86374 itchy Itch  
 1415770\_at 0.87368 WD repeat domain 6 Wdr6  
 1415771\_at 1.31355 nucleolin Ncl  
 1415772\_at 1.19104 nucleolin Ncl  
 1415773\_at 1.25252 nucleolin Ncl  
 1415774\_at 1.00502 signal transducer and activator of transcription interacting protein 1 Statip1  
 1415775\_at 0.98471 retinoblastoma binding protein 7 Rbbp7  
 1415776\_at 1.04301 "aldehyde dehydrogenase family 3, subfamily A2" Aldh3a2  
 1415777\_at 0.95752 pancreatic lipase related protein 1 Pnliprp1  
 1415778\_at 0.97861 mortality factor 4 like 2 Morf4l2  
 1415779\_s\_at 0.93269 "actin, gamma, cytoplasmic 1" Actg1  
 1415780\_a\_at 0.96980 "armadillo repeat containing, X-linked 2" Armcx2  
 1415781\_a\_at 0.97614 SMT3 suppressor of mif two 3 homolog 2 (yeast) /// similar to SMT3  
 suppressor of mif two 3 homolog 2 /// similar to SMT3 suppressor of mif two 3 homolog 2 Sumo2 ///  
 LOC672381 /// LOC675440  
 1415782\_at 0.97112 SMT3 suppressor of mif two 3 homolog 2 (yeast) Sumo2  
 1415783\_at 0.98985 vacuolar protein sorting 35 Vps35  
 1415784\_at 0.95225 vacuolar protein sorting 35 Vps35  
 1415785\_a\_at 1.09653 chaperonin subunit 8 (theta) Cct8  
 1415786\_at 0.85776 progastricsin (pepsinogen C) Pgc  
 1415787\_at 0.97904 alpha glucosidase 2 alpha neutral subunit Ganab  
 1415788\_at 0.99339 ubiquitin-like domain containing CTD phosphatase 1 Ublcp1  
 1415789\_a\_at 1.06763 ubiquitin-like domain containing CTD phosphatase 1 /// similar to ubiquitin-  
 like domain containing CTD phosphatase 1 Ublcp1 /// LOC665689

|              |         |                                                                                    |          |
|--------------|---------|------------------------------------------------------------------------------------|----------|
| 1415790_at   | 1.06106 | ubiquitin-like domain containing CTD phosphatase 1                                 | Ublcp1   |
| 1415791_at   | 0.92732 | ring finger protein 34                                                             | Rnf34    |
| 1415792_at   | 1.00830 | RanBP-type and C3HC4-type zinc finger containing 1                                 | Rbck1    |
| 1415793_at   | 1.00955 | pyridoxine 5'-phosphate oxidase                                                    | Pnp0     |
| 1415794_a_at | 0.92303 | spindlin                                                                           | Spin     |
| 1415795_at   | 0.99445 | spindlin                                                                           | Spin     |
| 1415796_at   | 0.98173 | DAZ associated protein 2                                                           | Dazap2   |
| 1415797_at   | 0.86284 | "discoidin domain receptor family, member 1"                                       | Ddr1     |
| 1415798_at   | 0.88710 | "discoidin domain receptor family, member 1"                                       | Ddr1     |
| 1415799_at   | 1.02262 | WW domain binding protein 11                                                       | Wbp11    |
| 1415800_at   | 0.91939 | gap junction membrane channel protein alpha 1                                      | Gja1     |
| 1415801_at   | 0.87100 | gap junction membrane channel protein alpha 1                                      | Gja1     |
| 1415802_at   | 1.03586 | "solute carrier family 16 (monocarboxylic acid transporters), member 1"            | Slc16a1  |
| 1415803_at   | 1.04938 | chemokine (C-X3-C motif) ligand 1                                                  | Cx3cl1   |
| 1415804_at   | 1.04757 | chemokine (C-X3-C motif) ligand 1                                                  | Cx3cl1   |
| 1415805_at   | 0.90602 | "colipase, pancreatic"                                                             | Clps     |
| 1415806_at   | 0.92149 | "plasminogen activator, tissue"                                                    | Plat     |
| 1415807_s_at | 0.99381 | "splicing factor, arginine/serine-rich 2 (SC-35)"                                  | Sfrs2    |
| 1415808_at   | 1.04800 | trophoblast specific protein alpha                                                 | Tpbpa    |
| 1415809_at   | 1.06848 | trophoblast specific protein alpha                                                 | Tpbpa    |
| 1415810_at   | 1.06940 | "ubiquitin-like, containing PHD and RING finger domains, 1"                        | Uhrf1    |
| 1415811_at   | 1.04151 | "ubiquitin-like, containing PHD and RING finger domains, 1"                        | Uhrf1    |
| 1415812_at   | 0.89135 | gelsolin                                                                           | Gsn      |
| 1415813_at   | 1.05977 | apoptosis inhibitor 5                                                              | Api5     |
| 1415814_at   | 0.98662 | "ATPase, H+ transporting, lysosomal V1 subunit B2"                                 | Atp6v1b2 |
| 1415815_at   | 0.94270 | tripartite motif protein 27                                                        | Trim27   |
| 1415816_at   | 1.16392 | chaperonin subunit 7 (eta)                                                         | Cct7     |
| 1415817_s_at | 1.01732 | chaperonin subunit 7 (eta)                                                         | Cct7     |
| 1415818_at   | 0.79656 | annexin A6                                                                         | Anxa6    |
| 1415819_a_at | 0.95664 | "protein phosphatase 2 (formerly 2A), regulatory subunit A (PR 65), alpha isoform" | Ppp2r1a  |
| 1415820_x_at | 0.98573 | "non-POU-domain-containing, octamer binding protein"                               | Nono     |
| 1415821_at   | 0.95726 | neuroplastin                                                                       | Nptn     |
| 1415822_at   | 1.05457 | stearoyl-Coenzyme A desaturase 2                                                   | Scd2     |
| 1415823_at   | 1.14659 | stearoyl-Coenzyme A desaturase 2                                                   | Scd2     |
| 1415824_at   | 1.02222 | stearoyl-Coenzyme A desaturase 2                                                   | Scd2     |
| 1415825_s_at | 0.93359 | "casein kinase 1, delta"                                                           | Csnk1d   |
| 1415826_at   | 1.12403 | "ATPase, H+ transporting, lysosomal V1 subunit H"                                  | Atp6v1h  |
| 1415827_a_at | 0.92140 | "DNA segment, Chr 3, University of California at Los Angeles 1"                    | D3Ucla1  |
| 1415828_a_at | 0.94854 | "DNA segment, Chr 3, University of California at Los Angeles 1"                    | D3Ucla1  |
| 1415829_at   | 1.11509 | lamin B receptor                                                                   | Lbr      |
| 1415830_at   | 0.97824 | "origin recognition complex, subunit 5-like ( <i>S. cerevisiae</i> )"              | Orc5l    |
| 1415831_at   | 1.08753 | "proteasome (prosome, macropain) 26S subunit, non-ATPase, 2"                       | Psmd2    |

1415832\_at 0.92633 "angiotensin II receptor, type 2" Agtr2  
 1415833\_x\_at 0.89011 ribosomal protein S29 /// similar to 40S ribosomal protein S29 /// similar to 40S ribosomal protein S29 Rps29 /// LOC629957 /// LOC637599  
 1415834\_at 0.93085 dual specificity phosphatase 6 Dusp6  
 1415835\_at 1.12113 chorionic somatomammotropin hormone 2 Csh2  
 1415836\_at 1.08310 "aldehyde dehydrogenase 18 family, member A1" Aldh18a1  
 1415837\_at 0.95275 kallikrein 1 Klk1  
 1415838\_at 0.92171 serine incorporator 1 Serinc1  
 1415839\_a\_at 1.16155 nucleophosmin 1 Npm1  
 1415840\_at 1.01054 "ELOVL family member 5, elongation of long chain fatty acids (yeast)" Elovl5  
 1415841\_at 0.91448 dynein cytoplasmic 1 intermediate chain 2 Dync1i2  
 1415842\_at 0.91587 G protein beta subunit-like Gbl  
 1415843\_at 1.10030 G protein beta subunit-like Gbl  
 1415844\_at 1.06500 synaptotagmin IV Syt4  
 1415845\_at 1.00003 synaptotagmin IV Syt4  
 1415846\_a\_at 0.82866 lactate dehydrogenase C Ldhc  
 1415847\_at 1.16015 lactate dehydrogenase C Ldhc  
 1415848\_at 1.05468 chorionic somatomammotropin hormone 1 Csh1  
 1415849\_s\_at 0.86249 stathmin 1 Stmn1  
 1415850\_at 1.10982 RAS p21 protein activator 3 Rasa3  
 1415851\_a\_at 1.06399 inosine 5'-phosphate dehydrogenase 2 Impdh2  
 1415852\_at 1.07864 inosine 5'-phosphate dehydrogenase 2 Impdh2  
 1415853\_at 1.02658 differentially expressed in FDCP 8 Def8  
 1415854\_at 0.76649 kit ligand Kitl  
 1415855\_at 0.82832 kit ligand Kitl  
 1415856\_at 0.94556 embigin Emb  
 1415857\_at 1.00515 embigin Emb  
 1415858\_at 1.10628 "eukaryotic translation initiation factor 3, subunit 8" Eif3s8  
 1415859\_at 1.01663 "eukaryotic translation initiation factor 3, subunit 8" Eif3s8  
 1415860\_at 1.09785 karyopherin (importin) alpha 2 /// similar to Importin alpha-2 subunit (Karyopherin alpha-2 subunit) (SRP1-alpha) (RAG cohort protein 1) (Pendulin) (Pore targeting complex 58 kDa subunit) (PTAC58) (Importin alpha P1) /// similar to Importin alpha-2 subunit (Karyopherin alpha-2 subunit) (SRP1-alpha) (RAG cohort protein 1) (Pendulin) (Pore targeting complex 58 kDa subunit) (PTAC58) (Importin alpha P1) Kpna2 /// LOC670551 /// LOC671639  
 1415861\_at 1.10492 tyrosinase-related protein 1 Tyrp1  
 1415862\_at 1.04405 tyrosinase-related protein 1 Tyrp1  
 1415863\_at 1.03167 "eukaryotic translation initiation factor 4, gamma 2" Eif4g2  
 1415864\_at 0.96637 "2,3-bisphosphoglycerate mutase" Bpgm  
 1415865\_s\_at 1.10339 "2,3-bisphosphoglycerate mutase" Bpgm  
 1415866\_at 1.12592 unc-45 homolog A (C. elegans) Unc45a  
 1415867\_at 1.03903 chaperonin subunit 4 (delta) Cct4  
 1415868\_at 1.11574 chaperonin subunit 4 (delta) Cct4  
 1415869\_a\_at 0.95705 tripartite motif protein 28 Trim28

|              |         |                                                                           |               |  |
|--------------|---------|---------------------------------------------------------------------------|---------------|--|
| 1415870_at   | 0.88942 | calumenin                                                                 | Calu          |  |
| 1415871_at   | 0.88675 | "transforming growth factor, beta induced"                                | Tgfb1         |  |
| 1415872_at   | 1.04502 | heterogeneous nuclear ribonucleoprotein H1                                | Hnrph1        |  |
| 1415873_a_at | 0.95042 | ARP1 actin-related protein 1 homolog A (yeast)                            | Actr1a        |  |
| 1415874_at   | 0.83124 | sprouty homolog 1 (Drosophila)                                            | Spry1         |  |
| 1415875_at   | 0.90589 | RIKEN cDNA 3010003L21 gene                                                | 3010003L21Rik |  |
| 1415876_a_at | 1.03884 | ribosomal protein S26                                                     | Rps26         |  |
| 1415877_at   | 0.40085 | dihydropyrimidinase-like 3                                                | Dpysl3        |  |
| 1415878_at   | 1.07404 | ribonucleotide reductase M1                                               | Rrm1          |  |
| 1415879_a_at | 1.06398 | "ribosomal protein, large P2"                                             | Rplp2         |  |
| 1415880_a_at | 0.99849 | lysosomal membrane glycoprotein 1                                         | Lamp1         |  |
| 1415881_at   | 1.02437 | growth hormone inducible transmembrane protein                            | Ghitm         |  |
| 1415882_at   | 1.01929 | growth hormone inducible transmembrane protein                            | Ghitm         |  |
| 1415883_a_at | 1.03841 | "elastase 3, pancreatic"                                                  | Ela3          |  |
| 1415884_at   | 0.97289 | "elastase 3, pancreatic"                                                  | Ela3          |  |
| 1415885_at   | 1.02161 | chromogranin B                                                            | Chgb          |  |
| 1415886_at   | 0.99392 | SH2 domain containing 3C                                                  | Sh2d3c        |  |
| 1415887_at   | 0.97795 | Trk-fused gene                                                            | Tfg           |  |
| 1415888_at   | 1.08371 | hepatoma-derived growth factor                                            | Hdgf          |  |
| 1415889_a_at | 0.97353 | "heat shock protein 90kDa beta (Grp94), member 1"                         | Hsp90b1       |  |
| 1415890_at   | 0.88366 | 3'-phosphoadenosine 5'-phosphosulfate synthase 1                          | Papss1        |  |
| 1415891_at   | 1.05873 | "succinate-CoA ligase, GDP-forming, alpha subunit"                        | Suc1g1        |  |
| 1415892_at   | 0.98659 | sphingosine phosphate lyase 1                                             | Sgpl1         |  |
| 1415893_at   | 0.93696 | sphingosine phosphate lyase 1                                             | Sgpl1         |  |
| 1415894_at   | 1.07266 | ectonucleotide pyrophosphatase/phosphodiesterase 2                        | Enpp2         |  |
| 1415895_at   | 0.96408 | small nuclear ribonucleoprotein N                                         | Snrpn         |  |
| 1415896_x_at | 0.97529 | small nuclear ribonucleoprotein N                                         | Snrpn         |  |
| 1415897_a_at | 1.18015 | microsomal glutathione S-transferase 1                                    | Mgst1         |  |
| 1415898_at   | 1.03431 | microsomal glutathione S-transferase 1                                    | Mgst1         |  |
| 1415899_at   | 0.82573 | Jun-B oncogene                                                            | Junb          |  |
| 1415900_a_at | 1.03759 | kit oncogene                                                              | Kit           |  |
| 1415901_at   | 0.87565 | "procollagen-lysine, 2-oxoglutarate 5-dioxygenase 3"                      | Plod3         |  |
| 1415902_at   | 0.96009 | "aldehyde dehydrogenase family 7, member A1"                              | Aldh7a1       |  |
| 1415903_at   | 1.07623 | "solute carrier family 38, member 1"                                      | Slc38a1       |  |
| 1415904_at   | 0.64291 | lipoprotein lipase                                                        | Lpl           |  |
| 1415905_at   | 0.89810 | regenerating islet-derived 1                                              | Reg1          |  |
| 1415906_at   | 0.87979 | "thymosin, beta 4, X chromosome"                                          | Tmsb4x        |  |
| 1415907_at   | 0.95668 | cyclin D3                                                                 | Ccnd3         |  |
| 1415908_at   | 0.85584 | "testis-specific protein, Y-encoded-like 1"                               | Tspyl1        |  |
| 1415909_at   | 1.11368 | stress-induced phosphoprotein 1                                           | Stip1         |  |
| 1415910_s_at | 0.99490 | cytokine induced apoptosis inhibitor 1                                    | Ciapin1       |  |
| 1415911_at   | 1.18125 | imprinted and ancient                                                     | Impact        |  |
| 1415912_a_at | 1.10500 | ribosomal protein S13 /// similar to ribosomal protein S13 /// similar to |               |  |

ribosomal protein S13 /// similar to ribosomal protein S13 /// similar to ribosomal protein S13 /// similar to ribosomal protein S13  
 to ribosomal protein S13 Rps13 /// LOC625298 /// LOC628061 /// LOC633920 /// LOC637251 /// LOC671723

1415913\_at 1.10956 ribosomal protein S13 /// similar to ribosomal protein S13  
 to ribosomal protein S13 /// similar to ribosomal protein S13 /// similar to ribosomal protein S13  
 Rps13 /// LOC625298 /// LOC628061 /// LOC633920 /// LOC637251 /// LOC668239 /// LOC671723 /// LOC671887

1415914\_at 1.04724 heterogeneous nuclear ribonucleoprotein A/B Hnrpab

1415915\_at 1.03425 DEAD (Asp-Glu-Ala-Asp) box polypeptide 1 Ddx1

1415916\_a\_at 1.04265 "methylenetetrahydrofolate dehydrogenase (NADP+ dependent), methenyltetrahydrofolate cyclohydrolase, formyltetrahydrofolate synthase" Mthfd1

1415917\_at 1.03169 "methylenetetrahydrofolate dehydrogenase (NADP+ dependent), methenyltetrahydrofolate cyclohydrolase, formyltetrahydrofolate synthase" Mthfd1

1415918\_a\_at 1.17086 triosephosphate isomerase 1 Tpi1

1415919\_at 0.94002 "neural proliferation, differentiation and control gene 1" Npdc1

1415920\_at 0.77838 "cleavage stimulation factor, 3' pre-RNA subunit 2, tau" Cstf2t

1415921\_a\_at 0.99104 "tumor necrosis factor receptor superfamily, member 19" Tnfrsf19

1415922\_s\_at 0.80933 MARCKS-like 1 Marcksl1

1415923\_at 0.98202 necdin Ndn

1415924\_at 1.00981 transition protein 1 Tnp1

1415925\_a\_at 0.90608 nucleoporin 62 Nup62

1415926\_at 0.94634 nucleoporin 62 Nup62

1415927\_at 1.05778 "actin, alpha, cardiac" Actc1

1415928\_a\_at 0.87793 microtubule-associated protein 1 light chain 3 beta Map1lc3b

1415929\_at 0.89484 microtubule-associated protein 1 light chain 3 beta Map1lc3b

1415930\_a\_at 1.01147 microtubule-associated protein 1 light chain 3 beta Map1lc3b

1415931\_at 0.79602 insulin-like growth factor 2 Igf2

1415932\_x\_at 0.90247 "ATPase, class II, type 9A" Atp9a

1415933\_a\_at 0.99413 "cytochrome c oxidase, subunit Va" Cox5a

1415934\_at 0.94509 "COP9 (constitutive photomorphogenic) homolog, subunit 8 (Arabidopsis thaliana)" Cops8

1415935\_at 0.95941 SPARC related modular calcium binding 2 Smoc2

1415936\_at 0.89077 breast cancer anti-estrogen resistance 3 Bcar3

1415937\_s\_at 0.91150 programmed cell death 6 interacting protein Pcd6ip

1415938\_at 0.92625 "serine peptidase inhibitor, Kazal type 3" Spink3

1415939\_at 0.66901 fibromodulin Fmod

1415940\_at 0.98303 "zinc finger, AN1-type domain 2A" Zfand2a

1415941\_s\_at 0.98476 "zinc finger, AN1-type domain 2A" Zfand2a

1415942\_at 1.03210 ribosomal protein 10 /// similar to ribosomal protein L10 /// similar to ribosomal protein L10  
 Rpl10 /// LOC234703 /// LOC638133

1415943\_at 0.83362 syndecan 1 Sdc1

1415944\_at 0.84329 syndecan 1 Sdc1

1415945\_at 0.93153 "minichromosome maintenance deficient 5, cell division cycle 46 (S. cerevisiae)" Mcm5  
 1415946\_at 0.87425 "phosphatidylinositol glycan anchor biosynthesis, class Q" Pigq  
 1415947\_at 1.06145 cellular repressor of E1A-stimulated genes 1 Creg1  
 1415948\_at 1.09902 cellular repressor of E1A-stimulated genes 1 Creg1  
 1415949\_at 0.83458 carboxypeptidase E Cpe  
 1415950\_a\_at 0.99872 phosphatidylethanolamine binding protein 1 Pebp1  
 1415951\_at 0.80485 FK506 binding protein 10 Fkbp10  
 1415952\_at 1.05065 MAP/microtubule affinity-regulating kinase 2 Mark2  
 1415953\_s\_at 0.99158 MAP/microtubule affinity-regulating kinase 2 Mark2  
 1415954\_at 1.08081 "trypsin 4 /// protease, serine, 1 (trypsin 1) /// RIKEN cDNA 1810049H19 gene /// trypsinogen 10" Try4 /// Prss1 /// 1810049H19Rik /// LOC436522  
 1415955\_x\_at 1.08008 protamine 1 Prm1  
 1415956\_a\_at 1.01046 PCTAIRE-motif protein kinase 1 Pctk1  
 1415957\_a\_at 0.97883 novel nuclear protein 1 Nnp1  
 1415958\_at 0.84053 "solute carrier family 2 (facilitated glucose transporter), member 4" Slc2a4  
 1415959\_at 0.89012 "solute carrier family 2 (facilitated glucose transporter), member 4" Slc2a4  
 1415960\_at 0.90126 myeloperoxidase Mpo  
 1415961\_at 0.81868 integral membrane protein 2C Itm2c  
 1415962\_at 0.99048 "eukaryotic translation initiation factor 3, subunit 3 (gamma)" Eif3s3  
 1415963\_at 1.11676 heterogeneous nuclear ribonucleoprotein H2 Hnrph2  
 1415964\_at 1.40388 stearoyl-Coenzyme A desaturase 1 Scd1  
 1415965\_at 1.40597 stearoyl-Coenzyme A desaturase 1 Scd1  
 1415966\_a\_at 0.94437 NADH dehydrogenase (ubiquinone) flavoprotein 1 Ndufv1  
 1415967\_at 0.96119 NADH dehydrogenase (ubiquinone) flavoprotein 1 Ndufv1  
 1415968\_a\_at 0.88147 kidney androgen regulated protein Kap  
 1415969\_s\_at 1.04805 kidney androgen regulated protein Kap  
 1415970\_at 0.94893 "cytochrome c oxidase, subunit VIc" Cox6c  
 1415971\_at 1.00054 myristoylated alanine rich protein kinase C substrate Marcks  
 1415972\_at 1.08693 myristoylated alanine rich protein kinase C substrate Marcks  
 1415973\_at 0.97335 "0 day neonate cerebellum cDNA, RIKEN full-length enriched library, clone: C230070N19 product:myristoylated alanine rich protein kinase C substrate, full insert sequence" ---  
 1415974\_at 0.95207 mitogen activated protein kinase kinase 2 Map2k2  
 1415975\_at 0.85695 calcium regulated heat stable protein 1 Carhsp1  
 1415976\_a\_at 1.00103 calcium regulated heat stable protein 1 Carhsp1  
 1415977\_at 0.92435 myo-inositol 1-phosphate synthase A1 Isynal  
 1415978\_at 0.86024 "tubulin, beta 3" Tubb3  
 1415979\_x\_at 1.05233 ribosomal protein L7 Rpl7  
 1415980\_at 0.99204 "ATP synthase, H+ transporting, mitochondrial F0 complex, subunit c (subunit 9), isoform 2" Atp5g2  
 1415981\_at 0.98809 HERPUD family member 2 Herpud2  
 1415982\_at 0.95041 HERPUD family member 2 Herpud2  
 1415983\_at 1.09232 lymphocyte cytosolic protein 1 Lcp1

1415984\_at 0.83823 "acyl-Coenzyme A dehydrogenase, medium chain" Acadm  
 1415985\_at 1.02914 "splicing factor 3b, subunit 3" Sf3b3  
 1415986\_at 0.92538 chloride channel 4-2 Clcn4-2  
 1415987\_at 1.10127 high density lipoprotein (HDL) binding protein Hdlbp  
 1415988\_at 1.03539 high density lipoprotein (HDL) binding protein Hdlbp  
 1415989\_at 1.19129 vascular cell adhesion molecule 1 Vcam1  
 1415990\_at 1.03612 voltage-dependent anion channel 2 Vdac2  
 1415991\_a\_at 0.95531 kelch domain containing 3 Klhdc3  
 1415992\_at 0.88820 "phosphatidylinositol glycan anchor biosynthesis, class O" Pigo  
 1415993\_at 1.46319 squalene epoxidase Sqle  
 1415994\_at 0.88601 "cytochrome P450, family 2, subfamily e, polypeptide 1" Cyp2e1  
 1415995\_at 0.89945 caspase 6 Casp6  
 1415996\_at 0.89052 thioredoxin interacting protein Txnip  
 1415997\_at 0.74160 thioredoxin interacting protein Txnip  
 1415998\_at 0.98788 voltage-dependent anion channel 1 Vdac1  
 1415999\_at 0.78428 hairy/enhancer-of-split related with YRPW motif 1 Hey1  
 1416000\_a\_at 1.01835 peroxiredoxin 1 Prdx1  
 1416001\_a\_at 0.91014 coactosin-like 1 (Dictyostelium) Cot11  
 1416002\_x\_at 0.78957 coactosin-like 1 (Dictyostelium) Cot11  
 1416003\_at 0.84815 claudin 11 Cldn11  
 1416004\_at 0.93530 "tyrosine 3-monooxygenase/tryptophan 5-monooxygenase activation protein, eta polypeptide" Ywhah  
 1416005\_at 1.13207 "protease (prosome, macropain) 26S subunit, ATPase 1" Psmc1  
 1416006\_at 1.01438 midkine Mdk  
 1416007\_at 0.56739 special AT-rich sequence binding protein 1 Satb1  
 1416008\_at 0.50955 special AT-rich sequence binding protein 1 Satb1  
 1416009\_at 0.85239 tetraspanin 3 Tspan3  
 1416010\_a\_at 1.10991 EH-domain containing 1 Ehd1  
 1416011\_x\_at 1.15038 EH-domain containing 1 Ehd1  
 1416012\_at 1.09124 EH-domain containing 1 Ehd1  
 1416013\_at 0.76586 "phospholipase D family, member 3" Pld3  
 1416014\_at 1.00371 "ATP-binding cassette, sub-family E (OABP), member 1" Abce1  
 1416015\_s\_at 1.07786 "ATP-binding cassette, sub-family E (OABP), member 1" Abce1  
 1416016\_at 0.91215 "transporter 1, ATP-binding cassette, sub-family B (MDR/TAP)" Tap1  
 1416017\_at 0.93001 "coatamer protein complex, subunit gamma" Copg  
 1416018\_at 0.95008 down-regulator of transcription 1 Dr1  
 1416019\_at 0.87504 down-regulator of transcription 1 Dr1  
 1416020\_a\_at 1.04382 "ATP synthase, H+ transporting, mitochondrial F0 complex, subunit c (subunit 9), isoform 1" Atp5g1  
 1416021\_a\_at 1.07194 "fatty acid binding protein 5, epidermal /// similar to Fatty acid-binding protein, epidermal (E-FABP) (Psoriasis-associated fatty acid-binding protein homolog) (PA-FABP) (Keratinocyte lipid-binding protein) /// similar to Fatty acid-binding protein, epidermal (E-FABP) (Psoriasis-associated fatty acid-binding protein homolog) (PA-FABP) (Keratinocyte lipid-binding

protein) /// similar to Fatty acid-binding protein, epidermal (E-FABP) (Psoriasis-associated fatty acid-binding protein homolog) (PA-FABP) (Keratinocyte lipid-binding protein) /// similar to Fatty acid-binding protein, epidermal (E-FABP) (Psoriasis-associated fatty acid-binding protein homolog) (PA-FABP) (Keratinocyte lipid-binding protein)" Fabp5 /// LOC628298 /// LOC637129 /// LOC669559 /// LOC672321

1416022\_at 1.10051 "fatty acid binding protein 5, epidermal" Fabp5

1416023\_at 0.93678 "fatty acid binding protein 3, muscle and heart" Fabp3

1416024\_x\_at 1.06047 chaperonin subunit 3 (gamma) Cct3

1416025\_at 1.00835 "fibrinogen, gamma polypeptide" Fgg

1416026\_a\_at 1.08444 ribosomal protein L12 Rpl12

1416027\_at 1.00673 programmed cell death 6 Pcd6

1416028\_a\_at 1.02459 hematological and neurological expressed sequence 1 Hn1

1416029\_at 0.75072 Kruppel-like factor 10 Klf10

1416030\_a\_at 0.87528 minichromosome maintenance deficient 7 (*S. cerevisiae*) Mcm7

1416031\_s\_at 0.93101 minichromosome maintenance deficient 7 (*S. cerevisiae*) Mcm7

1416032\_at 0.90329 transmembrane protein 109 Tmem109

1416033\_at 0.98667 transmembrane protein 109 Tmem109

1416034\_at 0.85646 CD24a antigen Cd24a

1416035\_at 1.06711 --- ---

1416036\_at 0.99517 FK506 binding protein 1a Fkbp1a

1416037\_a\_at 1.01144 chaperonin subunit 2 (beta) Cct2

1416038\_at 1.03413 expressed sequence AL033314 AL033314

1416039\_x\_at 0.70266 cysteine rich protein 61 Cyr61

1416040\_at 1.07544 "lipase, gastric" Lipf

1416041\_at 0.80530 serum/glucocorticoid regulated kinase Sgk

1416042\_s\_at 1.01984 nuclear autoantigenic sperm protein (histone-binding) Nasp

1416043\_at 1.02684 nuclear autoantigenic sperm protein (histone-binding) Nasp

1416044\_at 0.96006 flightless I homolog (*Drosophila*) Fliih

1416045\_a\_at 0.96813 "SWI/SNF related, matrix associated, actin dependent regulator of chromatin, subfamily b, member 1" Smarcb1

1416046\_a\_at 1.06369 "fucosidase, alpha-L- 2, plasma" Fuca2

1416047\_at 0.92620 "fucosidase, alpha-L- 2, plasma" Fuca2

1416048\_at 1.02124 polyhomeotic-like 2 (*Drosophila*) Phc2

1416049\_at 1.00693 glycine decarboxylase Glc

1416050\_a\_at 0.96486 "scavenger receptor class B, member 1" Scarb1

1416051\_at 1.08252 complement component 2 (within H-2S) C2

1416052\_at 1.00092 phosphoribosyl pyrophosphate synthetase 1 Prps1

1416053\_at 1.01560 "leucine rich repeat protein 1, neuronal" Lrrn1

1416054\_at 1.04883 ribosomal protein S5 Rps5

1416055\_at 0.97089 "amylase 2, pancreatic /// RIKEN cDNA 1810008N23 gene" Amy2 /// 1810008N23Rik

1416056\_a\_at 0.88312 "NADH dehydrogenase (ubiquinone) 1 beta subcomplex, 11" Ndufb11

1416057\_at 0.91955 "NADH dehydrogenase (ubiquinone) 1 beta subcomplex, 11" Ndufb11



1416058\_s\_at 0.93974 "ATP synthase, H<sup>+</sup> transporting, mitochondrial F1 complex, gamma polypeptide 1" Atp5c1  
 1416059\_at 0.91878 SEC23B (*S. cerevisiae*) Sec23b  
 1416060\_at 1.02558 "TBC1 domain family, member 15" Tbc1d15  
 1416061\_at 1.08737 "TBC1 domain family, member 15" Tbc1d15  
 1416062\_at 1.01759 "TBC1 domain family, member 15" Tbc1d15  
 1416063\_x\_at 1.01823 CEA-related cell adhesion molecule 11 Ceacam11  
 1416064\_a\_at 0.97708 heat shock 70kD protein 5 (glucose-regulated protein) Hspa5  
 1416065\_a\_at 1.07026 ankyrin repeat domain 10 Ankrd10  
 1416066\_at 0.97082 CD9 antigen Cd9  
 1416067\_at 1.17273 interferon-related developmental regulator 1 Ifrd1  
 1416068\_at 1.07517 lysyl-tRNA synthetase /// similar to lysyl-tRNA synthetase Kars ///  
 LOC631033  
 1416069\_at 0.99112 "phosphofructokinase, platelet" Pfkp  
 1416070\_a\_at 1.15744 DEAD (Asp-Glu-Ala-Asp) box polypeptide 18 Ddx18  
 1416071\_at 1.14761 DEAD (Asp-Glu-Ala-Asp) box polypeptide 18 Ddx18  
 1416072\_at 0.86938 CD34 antigen Cd34  
 1416073\_a\_at 0.98002 nucleoporin 85 Nup85  
 1416074\_a\_at 0.97483 ribosomal protein L28 Rpl28  
 1416075\_at 1.07563 salvador homolog 1 (*Drosophila*) Sav1  
 1416076\_at 1.09770 "cyclin B1, related sequence 1 /// cyclin B1 /// similar to G2/mitotic-specific cyclin-B1 /// similar to G2/mitotic-specific cyclin-B1" Ccnb1-rs1 /// Ccnb1 /// LOC434175 ///  
 LOC672788  
 1416077\_at 1.30351 adrenomedullin Adm  
 1416078\_s\_at 0.95535 v-raf-leukemia viral oncogene 1 Raf1  
 1416079\_a\_at 0.99266 "actin related protein 2/3 complex, subunit 1A" Arpc1a  
 1416080\_at 0.85509 a disintegrin and metallopeptidase domain 15 (metargidin) Adam15  
 1416081\_at 0.98116 MAD homolog 1 (*Drosophila*) Smad1  
 1416082\_at 0.97657 "RAB1, member RAS oncogene family" Rab1  
 1416083\_at 0.91552 "zinc finger, AN1-type domain 5" Zfand5  
 1416084\_at 0.93110 "zinc finger, AN1-type domain 5" Zfand5  
 1416085\_s\_at 0.91674 "zinc finger, AN1-type domain 5" Zfand5  
 1416086\_at 0.92378 protein-tyrosine sulfotransferase 2 Tpst2  
 1416087\_at 0.98801 "adaptor protein complex AP-1, sigma 1" Ap1s1  
 1416088\_a\_at 1.07240 ribosomal protein S15 Rps15  
 1416089\_at 1.06129 ribosomal protein S15 Rps15  
 1416090\_at 0.93791 pyruvate dehydrogenase (lipoamide) beta Pdhb  
 1416091\_at 0.94550 microtubule-associated protein 4 Mtap4  
 1416092\_a\_at 1.01313 microtubule-associated protein 4 Mtap4  
 1416093\_a\_at 1.05778 mitochondrial ribosomal protein L20 Mrpl20  
 1416094\_at 1.01017 a disintegrin and metallopeptidase domain 9 (meltrin gamma) Adam9  
 1416095\_x\_at 1.00064 RIKEN cDNA 1110005A23 gene 1110005A23Rik  
 1416096\_at 0.82892 expressed sequence AI413782 AI413782

1416097\_at 0.81474 leucine rich repeat containing 4 Lrrc4  
1416098\_at 0.87467 synaptogyrin 3 Syngr3  
1416099\_at 1.08280 ribosomal protein L27 /// similar to ribosomal protein L27 /// similar to  
ribosomal protein L27 /// similar to ribosomal protein L27 Rpl27 /// LOC621100 /// LOC669376 ///  
LOC675088  
1416100\_at 1.01548 "eukaryotic translation initiation factor 3, subunit 7 (zeta)" Eif3s7  
1416101\_a\_at 1.45734 "histone 1, H1c" Hist1h1c  
1416102\_at 1.03868 "tyrosine 3-monooxygenase/tryptophan 5-monooxygenase activation protein,  
zeta polypeptide" Ywhaz  
1416103\_at 0.94086 "tyrosine 3-monooxygenase/tryptophan 5-monooxygenase activation protein,  
zeta polypeptide" Ywhaz  
1416104\_at 1.09495 mannose-P-dolichol utilization defect 1 Mpdu1  
1416105\_at 0.87860 nicotinamide nucleotide transhydrogenase Nnt  
1416106\_at 1.06621 "KTI12 homolog, chromatin associated (S. cerevisiae)" Kti12  
1416107\_at 1.06020 neuron specific gene family member 2 Nsg2  
1416108\_a\_at 0.87234 transmembrane emp24 domain containing 3 Tmed3  
1416109\_at 0.99094 "fucosidase, alpha-L- 1, tissue" Fucal  
1416110\_at 0.94480 "solute carrier family 35, member A4" Slc35a4  
1416111\_at 1.09100 CD83 antigen Cd83  
1416112\_at 0.95158 "cytochrome c oxidase, subunit VIIIa" Cox8a  
1416113\_at 0.92207 FK506 binding protein 8 Fkbp8  
1416114\_at 0.93761 "SPARC-like 1 (mast9, hevin)" Sparcl1  
1416115\_at 0.96965 "origin recognition complex, subunit 3-like (S. cerevisiae)" Orc3l  
1416116\_at 1.00748 "origin recognition complex, subunit 3-like (S. cerevisiae)" Orc3l  
1416117\_at 0.88554 "origin recognition complex, subunit 3-like (S. cerevisiae)" Orc3l  
1416118\_at 0.90415 similar to mouse RING finger 1 LOC630539  
1416119\_at 1.07842 thioredoxin 1 Txn1  
1416120\_at 0.92009 ribonucleotide reductase M2 Rrm2  
1416121\_at 0.92703 lysyl oxidase Lox  
1416122\_at 1.00978 cyclin D2 Ccnd2  
1416123\_at 1.26487 cyclin D2 Ccnd2  
1416124\_at 0.93315 cyclin D2 Ccnd2  
1416125\_at 1.09269 FK506 binding protein 5 Fkbp5  
1416126\_at 1.16469 similar to DNA-directed RNA polymerase I 135 kDa polypeptide (RNA  
polymerase I subunit 2) (RPA135) LOC671429  
1416127\_a\_at 0.92440 aspartyl aminopeptidase Dnpep  
1416128\_at 0.97614 "tubulin, alpha 6 /// similar to Tubulin alpha-6 chain (Alpha-tubulin 6)"  
Tuba6 /// LOC626534  
1416129\_at 0.98611 ERBB receptor feedback inhibitor 1 Errfi1  
1416130\_at 0.83682 prion protein Prnp  
1416131\_s\_at 0.89997 RIKEN cDNA C920006C10 gene C920006C10Rik  
1416132\_at 0.97578 RIKEN cDNA C920006C10 gene C920006C10Rik  
1416133\_at 0.94686 RIKEN cDNA C920006C10 gene C920006C10Rik

1416134\_at 0.80465 amyloid beta (A4) precursor-like protein 1 Aplp1  
 1416135\_at 1.24173 apurinic/aprimidinic endonuclease 1 Apex1  
 1416136\_at 0.87170 matrix metalloproteinase 2 Mmp2  
 1416137\_at 0.99082 annexin A7 Anxa7  
 1416138\_at 1.04951 annexin A7 Anxa7  
 1416139\_at 0.96747 regenerating islet-derived 2 Reg2  
 1416140\_a\_at 1.00153 DEAH (Asp-Glu-Ala-His) box polypeptide 30 Dhx30  
 1416141\_a\_at 1.02854 ribosomal protein S6 /// similar to 40S ribosomal protein S6 /// similar to 40S  
 ribosomal protein S6 /// similar to 40S ribosomal protein S6 /// similar to 40S ribosomal protein S6  
 Rps6 /// LOC666577 /// LOC667739 /// LOC671306 /// LOC672620  
 1416142\_at 0.99252 ribosomal protein S6 /// similar to 40S ribosomal protein S6 /// similar to 40S  
 ribosomal protein S6 /// similar to 40S ribosomal protein S6 /// similar to 40S ribosomal protein S6 ///  
 similar to 40S ribosomal protein S6 /// similar to 40S ribosomal protein S6 /// similar to 40S ribosomal  
 protein S6 /// similar to 40S ribosomal protein S6 /// similar to 40S ribosomal protein S6 /// similar to  
 40S ribosomal protein S6 /// similar to 40S ribosomal protein S6 /// similar to 40S ribosomal protein  
 S6 /// similar to 40S ribosomal protein S6 /// similar to 40S ribosomal protein S6 /// similar to 40S  
 ribosomal protein S6 Rps6 /// LOC214738 /// LOC384383 /// LOC545640 /// LOC626259 ///  
 LOC629575 /// LOC638497 /// LOC639593 /// LOC639750 /// LOC666577 /// LOC667739 ///  
 LOC667922 /// LOC671306 /// LOC671432 /// LOC672620 /// LOC675985  
 1416143\_at 0.92147 "ATP synthase, H<sup>+</sup> transporting, mitochondrial F<sub>0</sub> complex, subunit F" Atp5j  
 1416144\_a\_at 0.97593 DEAH (Asp-Glu-Ala-His) box polypeptide 15 Dhx15  
 1416145\_at 0.98794 DEAH (Asp-Glu-Ala-His) box polypeptide 15 Dhx15  
 1416146\_at 1.21220 heat shock protein 4 Hspa4  
 1416147\_at 0.77617 heat shock protein 4 Hspa4  
 1416148\_at 0.89898 lysosomal-associated protein transmembrane 4B Laptm4b  
 1416149\_at 0.89536 oligodendrocyte transcription factor 1 Olig1  
 1416150\_a\_at 1.02496 "splicing factor, arginine/serine-rich 3 (SRp20)" Sfrs3  
 1416151\_at 0.81073 "splicing factor, arginine/serine-rich 3 (SRp20)" Sfrs3  
 1416152\_a\_at 0.85609 "splicing factor, arginine/serine-rich 3 (SRp20)" Sfrs3  
 1416153\_at 0.96994 signal recognition particle 54 /// similar to signal recognition particle 54  
 Srp54 /// LOC665155  
 1416154\_at 0.88600 signal recognition particle 54 /// similar to signal recognition particle 54  
 Srp54 /// LOC665155  
 1416155\_at 1.06168 high mobility group box 3 Hmgb3  
 1416156\_at 0.97932 vinculin Vcl  
 1416157\_at 1.06980 vinculin Vcl  
 1416158\_at 0.81758 "nuclear receptor subfamily 2, group F, member 2" Nr2f2  
 1416159\_at 0.86312 "nuclear receptor subfamily 2, group F, member 2" Nr2f2  
 1416160\_at 0.72729 "nuclear receptor subfamily 2, group F, member 2" Nr2f2  
 1416161\_at 1.02763 RAD21 homolog (*S. pombe*) Rad21  
 1416162\_at 0.99156 RAD21 homolog (*S. pombe*) Rad21  
 1416163\_at 1.01366 "COP9 (constitutive photomorphogenic) homolog, subunit 4 (*Arabidopsis  
 thaliana*)" Cops4

|              |         |                                                                       |               |  |
|--------------|---------|-----------------------------------------------------------------------|---------------|--|
| 1416164_at   | 0.86994 | fibulin 5                                                             | Fbln5         |  |
| 1416165_at   | 0.96258 | "RAB31, member RAS oncogene family"                                   | Rab31         |  |
| 1416166_a_at | 0.88484 | peroxiredoxin 4                                                       | Prdx4         |  |
| 1416167_at   | 0.95316 | peroxiredoxin 4                                                       | Prdx4         |  |
| 1416168_at   | 0.96949 | "serine (or cysteine) peptidase inhibitor, clade F, member 1"         | Serpinf1      |  |
| 1416169_at   | 0.91226 | trophoblast specific protein beta                                     | Tpbpb         |  |
| 1416170_at   | 0.99033 | TNF receptor-associated protein 1                                     | Trap1         |  |
| 1416171_at   | 1.03027 | RIKEN cDNA 2310037I24 gene                                            | 2310037I24Rik |  |
| 1416172_at   | 1.14496 | "pescadillo homolog 1, containing BRCT domain (zebrafish)"            | Pes1          |  |
| 1416173_at   | 0.91860 | "pescadillo homolog 1, containing BRCT domain (zebrafish)"            | Pes1          |  |
| 1416174_at   | 0.72802 | retinoblastoma binding protein 9                                      | Rbbp9         |  |
| 1416175_a_at | 0.92261 | voltage-dependent anion channel 3                                     | Vdac3         |  |
| 1416176_at   | 0.95440 | high mobility group box 1                                             | Hmgb1         |  |
| 1416177_at   | 1.05308 | "RNA binding motif protein, X chromosome retrogene"                   | Rbmxt         |  |
| 1416178_a_at | 0.90555 | "pleckstrin homology domain containing, family B (evectins) member 1" | Plekha1       |  |
| 1416179_a_at | 0.90916 | radixin                                                               | Rdx           |  |
| 1416180_a_at | 0.86517 | radixin                                                               | Rdx           |  |
| 1416181_at   | 0.89304 | mesoderm development candiate 2                                       | Mesdc2        |  |
| 1416182_at   | 0.87703 | "amyloid beta (A4) precursor protein-binding, family A, member 3"     | Apba3         |  |
| 1416183_a_at | 0.96896 | lactate dehydrogenase B                                               | Ldhb          |  |
| 1416184_s_at | 1.34221 | high mobility group AT-hook 1                                         | Hmga1         |  |
| 1416185_a_at | 1.00643 | "alcohol dehydrogenase 5 (class III), chi polypeptide"                | Adh5          |  |
| 1416186_at   | 0.95572 | proline-rich nuclear receptor coactivator 2                           | Pnrc2         |  |
| 1416187_s_at | 0.88446 | proline-rich nuclear receptor coactivator 2                           | Pnrc2         |  |
| 1416188_at   | 0.98931 | GM2 ganglioside activator protein                                     | Gm2a          |  |
| 1416189_a_at | 0.92835 | Sec61 alpha 1 subunit ( <i>S. cerevisiae</i> )                        | Sec61a1       |  |
| 1416190_a_at | 0.92609 | Sec61 alpha 1 subunit ( <i>S. cerevisiae</i> )                        | Sec61a1       |  |
| 1416191_at   | 0.91205 | Sec61 alpha 1 subunit ( <i>S. cerevisiae</i> )                        | Sec61a1       |  |
| 1416192_at   | 0.88513 | N-ethylmaleimide sensitive fusion protein attachment protein alpha    | Napa          |  |
| 1416193_at   | 0.96605 | carbonic anhydrase 1                                                  | Car1          |  |
| 1416194_at   | 0.99130 | "cytochrome P450, family 4, subfamily b, polypeptide 1"               | Cyp4b1        |  |
| 1416195_at   | 1.09258 | putative phosphatase                                                  | RP23-136K12.4 |  |
| 1416196_at   | 0.96390 | ribosomal protein SA                                                  | Rpsa          |  |
| 1416197_at   | 0.99299 | U1 small nuclear ribonucleoprotein C                                  | Snrpc         |  |
| 1416198_at   | 0.99129 | TH1-like homolog ( <i>Drosophila</i> )                                | Th11          |  |
| 1416199_at   | 0.94901 | kinesin family member C3                                              | Kifc3         |  |
| 1416200_at   | 1.10855 | RIKEN cDNA 9230117N10 gene                                            | 9230117N10Rik |  |
| 1416201_at   | 0.98053 | v-crk sarcoma virus CT10 oncogene homolog (avian)                     | Crk           |  |
| 1416202_at   | 1.09773 | prohibitin 2                                                          | Phb2          |  |
| 1416203_at   | 0.91208 | aquaporin 1                                                           | Aqp1          |  |
| 1416204_at   | 0.84436 | glycerol-3-phosphate dehydrogenase 1 (soluble)                        | Gpd1          |  |
| 1416205_at   | 0.84241 | "galactosidase, beta 1"                                               | Glb1          |  |

1416206\_at 0.97811 signal-induced proliferation associated gene 1 Sipal1  
1416207\_at 0.92043 tafazzin Taz  
1416208\_at 1.10705 ubiquitin specific peptidase 14 Usp14  
1416209\_at 1.05988 glutamate dehydrogenase 1 Glud1  
1416210\_at 1.10355 "IMP3, U3 small nucleolar ribonucleoprotein, homolog (yeast)" Imp3  
1416211\_a\_at 0.92987 pleiotrophin Ptn  
1416212\_at 1.04955 "mago-nashi homolog, proliferation-associated (Drosophila)" Magoh  
1416213\_x\_at 0.97927 surfeit gene 4 Surf4  
1416214\_at 0.96488 minichromosome maintenance deficient 4 homolog (S. cerevisiae) Mcm4  
1416215\_at 0.89205 golgi SNAP receptor complex member 1 Gosr1  
1416216\_at 1.10470 RalBP1 associated Eps domain containing protein Repls1  
1416217\_a\_at 0.98780 ribosomal protein L37a Rpl37a  
1416218\_x\_at 0.98688 ribosomal protein L37a /// similar to 60S ribosomal protein L37a /// similar to  
60S ribosomal protein L37a /// similar to 60S ribosomal protein L37a /// similar to 60S ribosomal  
protein L37a Rpl37a /// LOC629949 /// LOC640991 /// LOC668935 /// LOC674834  
1416219\_at 1.04591 ribosomal protein L19 Rpl19  
1416220\_at 1.01054 signal peptidase complex subunit 1 homolog (S. cerevisiae) Spcs1  
1416221\_at 0.74506 follistatin-like 1 Fstl1  
1416222\_at 1.48491 NAD(P) dependent steroid dehydrogenase-like Nsdhl  
1416223\_at 0.89669 SH3 binding domain protein 5 like Sh3bp5l  
1416224\_at 0.99291 zinc finger and BTB domain containing 17 Zbtb17  
1416225\_at 0.73128 alcohol dehydrogenase 1 (class I) Adh1  
1416226\_at 1.18326 "actin related protein 2/3 complex, subunit 1B" Arpc1b  
1416227\_at 1.08340 "actin related protein 2/3 complex, subunit 1B /// similar to Actin-related protein  
2/3 complex subunit 1B (ARP2/3 complex 41 kDa subunit) (p41-ARC) /// similar to Actin-related  
protein 2/3 complex subunit 1B (ARP2/3 complex 41 kDa subunit) (p41-ARC)" Arpc1b ///  
LOC434782 /// LOC671552  
1416228\_at 1.08119 protein (peptidyl-prolyl cis/trans isomerase) NIMA-interacting 1 Pin1  
1416229\_at 0.98596 riboflavin kinase Rfk  
1416230\_at 0.98781 riboflavin kinase Rfk  
1416231\_at 1.09806 Vac14 homolog (S. cerevisiae) Vac14  
1416232\_at 1.02742 oligodendrocyte transcription factor 2 Olig2  
1416233\_at 1.11291 "eukaryotic translation initiation factor 3, subunit 2 (beta)" Eif3s2  
1416234\_at 1.10591 leucine rich repeat containing 59 Lrrc59  
1416235\_at 0.99419 leucine rich repeat containing 59 Lrrc59  
1416236\_a\_at 0.85599 epithelial V-like antigen 1 Eva1  
1416237\_at 0.92988 epithelial V-like antigen 1 Eva1  
1416238\_at 1.12227 tyrosine kinase receptor 1 Tie1  
1416239\_at 0.41578 argininosuccinate synthetase 1 Ass1  
1416240\_at 1.17063 "proteasome (prosome, macropain) subunit, beta type 7" Psmb7  
1416241\_at 1.04216 SEC13-like 1 (S. cerevisiae) Sec13l1  
1416242\_at 0.97322 kelch-like 13 (Drosophila) Khl13  
1416243\_a\_at 1.07996 ribosomal protein L35 Rpl35

1416244\_a\_at 1.10804 cellular nucleic acid binding protein Cnbp  
1416245\_at 1.01037 aurora kinase A interacting protein 1 Aurkaip1  
1416246\_a\_at 1.09781 "coronin, actin binding protein 1A" Coro1a  
1416247\_at 1.03763 dynactin 3 Dctn3  
1416248\_at 1.07606 NAD kinase Nadk  
1416249\_at 1.04109 NAD kinase Nadk  
1416250\_at 0.79602 "B-cell translocation gene 2, anti-proliferative" Btg2  
1416251\_at 0.87763 "minichromosome maintenance deficient 6 (MIS5 homolog, S. pombe) (S. cerevisiae)" Mcm6  
1416252\_at 1.11419 serine/threonine kinase 38 Stk38  
1416253\_at 1.07887 "cyclin-dependent kinase inhibitor 2D (p19, inhibits CDK4)" Cdkn2d  
1416254\_a\_at 0.96270 vacuolar protein sorting 16 (yeast) Vps16  
1416255\_at 0.87833 gap junction membrane channel protein alpha 4 Gja4  
1416256\_a\_at 0.93787 "tubulin, beta 5" Tubb5  
1416257\_at 0.98767 calpain 2 Capn2  
1416258\_at 1.08359 thymidine kinase 1 Tk1  
1416259\_at 1.04910 peroxisomal biogenesis factor 12 Pex12  
1416260\_a\_at 1.02885 sorting nexin 1 Snx1  
1416261\_at 0.99088 transmembrane protein 19 Tmem19  
1416262\_at 0.94687 transmembrane protein 19 Tmem19  
1416263\_at 0.99710 "ATP-binding cassette, sub-family B (MDR/TAP), member 9" Abcb9  
1416264\_at 0.94004 "ATP-binding cassette, sub-family B (MDR/TAP), member 9" Abcb9  
1416265\_at 1.05137 calpain 10 Capn10  
1416266\_at 1.02284 prodynorphin Pdyn  
1416267\_at 0.99321 short coiled-coil protein Scoc  
1416268\_at 1.00177 "E26 avian leukemia oncogene 2, 3' domain" Ets2  
1416269\_at 0.97164 "ATP synthase, H+ transporting, mitochondrial F0 complex, subunit f, isoform 2" Atp5j2  
1416270\_at 1.00277 polymerase (RNA) II (DNA directed) polypeptide G Polr2g  
1416271\_at 0.81231 "PERP, TP53 apoptosis effector" Perp  
1416272\_at 1.02000 mitogen-activated protein kinase kinase 1 interacting protein 1 Map2k1ip1  
1416273\_at 1.04496 "tumor necrosis factor, alpha-induced protein 2" Tnfaip2  
1416274\_at 0.91552 "cystinosis, nephropathic" Ctns  
1416275\_at 0.82794 "solute carrier family 26, member 6" Slc26a6  
1416276\_a\_at 1.01962 "ribosomal protein S4, X-linked" Rps4x  
1416277\_a\_at 1.03822 "ribosomal protein, large, P1" Rplp1  
1416278\_a\_at 0.96879 "ATP synthase, H+ transporting, mitochondrial F1 complex, O subunit" Atp5o  
1416279\_at 0.98862 "adaptor protein complex AP-1, beta 1 subunit" Ap1b1  
1416280\_at 1.00888 ubiquitin-like 1 (sentrin) activating enzyme E1B Uble1b  
1416281\_at 0.96273 Wdr45 like Wdr45l  
1416282\_at 1.03421 "proteasome (prosome, macropain) 26S subunit, ATPase 3" Psmc3  
1416283\_at 1.08828 phosphoribosylglycinamide formyltransferase Gart

|              |         |                                                                                                   |                                  |  |
|--------------|---------|---------------------------------------------------------------------------------------------------|----------------------------------|--|
| 1416284_at   | 1.04986 | mitochondrial ribosomal protein L28                                                               | Mrpl28                           |  |
| 1416285_at   | 0.91207 | "NADH dehydrogenase (ubiquinone) 1, subcomplex unknown, 1"                                        | Ndufc1                           |  |
| 1416286_at   | 1.00871 | regulator of G-protein signaling 4                                                                | Rgs4                             |  |
| 1416287_at   | 0.86961 | regulator of G-protein signaling 4                                                                | Rgs4                             |  |
| 1416288_at   | 1.02291 | "DnaJ (Hsp40) homolog, subfamily A, member 1"                                                     | Dnaja1                           |  |
| 1416289_at   | 0.82882 | "procollagen-lysine, 2-oxoglutarate 5-dioxygenase 1"                                              | Plod1                            |  |
| 1416290_a_at | 1.03812 | "proteasome (prosome, macropain) 26S subunit, ATPase, 4"                                          | Psmc4                            |  |
| 1416291_at   | 1.14696 | "proteasome (prosome, macropain) 26S subunit, ATPase, 4"                                          | Psmc4                            |  |
| 1416292_at   | 1.03437 | peroxiredoxin 3                                                                                   | Prdx3                            |  |
| 1416293_at   | 0.89365 | nuclear factor I/B                                                                                | Nfib                             |  |
| 1416294_at   | 1.00637 | secretory carrier membrane protein 3                                                              | Scamp3                           |  |
| 1416295_a_at | 0.94375 | "interleukin 2 receptor, gamma chain"                                                             | Il2rg                            |  |
| 1416296_at   | 1.17229 | "interleukin 2 receptor, gamma chain"                                                             | Il2rg                            |  |
| 1416297_s_at | 0.88660 | pancreatitis-associated protein                                                                   | Pap                              |  |
| 1416298_at   | 1.04079 | matrix metalloproteinase 9                                                                        | Mmp9                             |  |
| 1416299_at   | 0.99283 | Shc SH2-domain binding protein 1                                                                  | Shcbp1                           |  |
| 1416300_a_at | 0.98619 | "solute carrier family 25 (mitochondrial carrier, phosphate carrier), member 3"                   | Slc25a3                          |  |
| 1416301_a_at | 1.00021 | early B-cell factor 1                                                                             | Ebf1                             |  |
| 1416302_at   | 0.90449 | early B-cell factor 1                                                                             | Ebf1                             |  |
| 1416303_at   | 1.13145 | LPS-induced TN factor                                                                             | Litaf                            |  |
| 1416304_at   | 1.06914 | LPS-induced TN factor                                                                             | Litaf                            |  |
| 1416305_at   | 1.03448 | SH3-domain binding protein 4                                                                      | Sh3bp4                           |  |
| 1416306_at   | 1.00949 | chloride channel calcium activated 3                                                              | Clca3                            |  |
| 1416307_at   | 0.92068 | "adaptor-related protein complex AP-1, mu subunit 1"                                              | Ap1m1                            |  |
| 1416308_at   | 1.10612 | UDP-glucose dehydrogenase                                                                         | Ugdh                             |  |
| 1416309_at   | 1.04627 | nucleolar and spindle associated protein 1                                                        | Nusap1                           |  |
| 1416310_at   | 0.83236 | nucleolar and spindle associated protein 1                                                        | Nusap1                           |  |
| 1416311_s_at | 0.97872 | "tubulin, alpha 3 /// tubulin, alpha 7 /// similar to tubulin, alpha 1"                           | Tuba3 ///<br>Tuba7 /// LOC384954 |  |
| 1416312_at   | 1.12364 | arginyl-tRNA synthetase                                                                           | Rars                             |  |
| 1416313_at   | 1.03889 | "myeloid/lymphoid or mixed-lineage leukemia (trithorax homolog, Drosophila); translocated to, 11" | Mllt11                           |  |
| 1416314_at   | 0.93593 | ---                                                                                               | ---                              |  |
| 1416315_at   | 0.88522 | abhydrolase domain containing 4                                                                   | Abhd4                            |  |
| 1416316_at   | 1.13752 | "solute carrier family 27 (fatty acid transporter), member 2"                                     | Slc27a2                          |  |
| 1416317_a_at | 0.88775 | Stam binding protein                                                                              | Stamp                            |  |
| 1416318_at   | 1.14764 | "serine (or cysteine) peptidase inhibitor, clade B, member 1a"                                    | Serpib1a                         |  |
| 1416319_at   | 1.00873 | adenosine kinase                                                                                  | Adk                              |  |
| 1416320_at   | 0.85750 | SEC22 vesicle trafficking protein-like A (S. cerevisiae)                                          | Sec22a                           |  |
| 1416321_s_at | 0.59518 | proline arginine-rich end leucine-rich repeat                                                     | Prelp                            |  |
| 1416322_at   | 0.77549 | proline arginine-rich end leucine-rich repeat                                                     | Prelp                            |  |
| 1416323_at   | 1.00720 | potassium channel tetramerisation domain containing 20                                            | Kctd20                           |  |

1416324\_s\_at 1.01149 potassium channel tetramerisation domain containing 20 Kctd20  
1416325\_at 1.06040 cysteine-rich secretory protein 1 Crisp1  
1416326\_at 0.86145 cysteine-rich protein 1 (intestinal) Crip1  
1416327\_at 1.02121 ubiquitin-fold modifier conjugating enzyme 1 Ufc1  
1416328\_a\_at 0.94643 "ATPase, H+ transporting, lysosomal V0 subunit E" Atp6v0e  
1416329\_at 1.02315 cytoplasmic FMR1 interacting protein 1 Cyfip1  
1416330\_at 0.88142 CD 81 antigen Cd81  
1416331\_a\_at 1.02178 "nuclear factor, erythroid derived 2,-like 1" Nfe2l1  
1416332\_at 0.80769 cold inducible RNA binding protein Cirbp  
1416333\_at 1.01796 docking protein 2 Dok2  
1416334\_at 0.79182 WW domain-containing oxidoreductase Wwox  
1416335\_at 1.25528 macrophage migration inhibitory factor Mif  
1416336\_s\_at 1.14845 small nuclear ribonucleoprotein D1 Snrpd1  
1416337\_at 0.98571 ubiquinol-cytochrome c reductase binding protein Uqcrb  
1416338\_at 0.94805 SH3-domain GRB2-like 1 Sh3gl1  
1416339\_a\_at 0.94129 protein kinase C substrate 80K-H PrkcsH  
1416340\_a\_at 0.90368 "mannosidase 2, alpha B1" Man2b1  
1416341\_at 1.00045 polymerase (RNA) II (DNA directed) polypeptide C Polr2c  
1416342\_at 0.98939 tenascin C Tnc  
1416343\_a\_at 0.81424 lysosomal membrane glycoprotein 2 Lamp2  
1416344\_at 0.84626 lysosomal membrane glycoprotein 2 Lamp2  
1416345\_at 1.10302 translocase of inner mitochondrial membrane 8 homolog a1 (yeast)  
Timm8a1  
1416346\_at 1.22749 translocase of inner mitochondrial membrane 8 homolog a1 (yeast)  
Timm8a1  
1416347\_at 1.05395 multiple endocrine neoplasia 1 Men1  
1416348\_at 1.04936 multiple endocrine neoplasia 1 Men1  
1416349\_at 1.01825 mitochondrial ribosomal protein L34 Mrpl34  
1416350\_at 1.01203 Kruppel-like factor 16 Klf16  
1416351\_at 1.06905 mitogen activated protein kinase kinase 1 Map2k1  
1416352\_s\_at 1.11885 "glycoprotein, synaptic 2" Gpsn2  
1416353\_at 0.95077 "nuclear receptor subfamily 1, group H, member 2" Nr1h2  
1416354\_at 1.00889 "RNA binding motif protein, X chromosome" Rbmx  
1416355\_at 0.95185 "RNA binding motif protein, X chromosome" Rbmx  
1416356\_at 1.04101 guanosine monophosphate reductase 2 Gmpr2  
1416357\_a\_at 0.52523 melanoma cell adhesion molecule Mcam  
1416358\_at 0.98938 RIKEN cDNA 0610009O03 gene 0610009O03Rik  
1416359\_at 0.97515 sorting nexin associated golgi protein 1 Snag1  
1416360\_at 0.88164 sorting nexin associated golgi protein 1 Snag1  
1416361\_a\_at 1.07156 dynein cytoplasmic 1 intermediate chain 1 Dync1i1  
1416362\_a\_at 0.93889 FK506 binding protein 4 Fkbp4  
1416363\_at 1.09409 FK506 binding protein 4 Fkbp4  
1416364\_at 1.04513 "heat shock protein 90kDa alpha (cytosolic), class B member 1" Hsp90ab1



1416365\_at 0.96688 "heat shock protein 90kDa alpha (cytosolic), class B member 1" Hsp90ab1  
1416366\_at 1.00314 "similar to NADH dehydrogenase (ubiquinone) 1, subcomplex unknown, 2"  
LOC675851  
1416367\_at 0.98889 RIKEN cDNA 1110001J03 gene 1110001J03Rik  
1416368\_at 1.03616 "glutathione S-transferase, alpha 4" Gsta4  
1416369\_at 0.96597 hippocampus abundant transcript-like 1 Hiatl1  
1416370\_at 0.90081 zinc finger proliferation 1 Zipro1  
1416371\_at 1.02338 apolipoprotein D Apod  
1416372\_at 0.99518 phosphatidylserine synthase 1 Ptdss1  
1416373\_at 0.93435 nitrogen fixation gene 1 (S. cerevisiae) Nfs1  
1416374\_at 1.02921 "adaptor-related protein complex 3, mu 1 subunit /// similar to AP-3 complex  
subunit mu-1 (Adapter-related protein complex 3 mu-1 subunit) (Mu-adaptin 3A) (AP-3 adapter  
complex mu3A subunit)" Ap3m1 /// LOC671800  
1416375\_at 0.91771 "adaptor-related protein complex 3, mu 1 subunit" Ap3m1  
1416376\_at 1.37028 transmembrane protein 97 Tmem97  
1416377\_at 1.07184 programmed cell death protein 7 Pcd7  
1416378\_at 0.92109 polynucleotide kinase 3'-phosphatase Pnkp  
1416379\_at 0.91273 pannexin 1 Panx1  
1416380\_at 0.93766 Moloney leukemia virus 10 Mov10  
1416381\_a\_at 1.08466 peroxiredoxin 5 Prdx5  
1416382\_at 1.07202 cathepsin C Ctsc  
1416383\_a\_at 1.00516 pyruvate carboxylase Pcx  
1416384\_a\_at 1.08373 "coatamer protein complex, subunit epsilon" Cope  
1416385\_a\_at 0.95796 "mannose-6-phosphate receptor, cation dependent" M6pr  
1416386\_a\_at 0.95448 "mannose-6-phosphate receptor, cation dependent" M6pr  
1416387\_at 0.93803 "phosphatidylinositol-4-phosphate 5-kinase, type II, gamma" Pip5k2c  
1416388\_at 1.01502 "phosphatidylinositol-4-phosphate 5-kinase, type II, gamma" Pip5k2c  
1416389\_a\_at 0.93089 regulator of chromosome condensation (RCC1) and BTB (POZ) domain  
containing protein 2 Rcbtb2  
1416390\_at 0.74556 regulator of chromosome condensation (RCC1) and BTB (POZ) domain  
containing protein 2 Rcbtb2  
1416391\_at 0.78992 pentatricopeptide repeat domain 1 Ptdc1  
1416392\_a\_at 1.06728 "ATPase, H+ transporting, lysosomal V0 subunit C" Atp6v0c  
1416393\_at 1.18707 EMG1 nucleolar protein homolog (S. cerevisiae) Emg1  
1416394\_at 0.99970 Bcl2-associated athanogene 1 Bag1  
1416395\_at 1.01594 guanylate kinase 1 Guk1  
1416396\_at 0.95893 --- ---  
1416397\_at 0.89055 mesoderm development candidate 1 Mesdc1  
1416398\_at 1.02785 mesoderm development candidate 1 Mesdc1  
1416399\_a\_at 0.93752 heme oxygenase (decycling) 2 Hmox2  
1416400\_at 0.98677 pyrroline-5-carboxylate reductase-like Pycrl  
1416401\_at 1.13154 CD82 antigen Cd82  
1416402\_at 0.92549 "ATP-binding cassette, sub-family B (MDR/TAP), member 10" Abcb10

|              |         |                                                                                                                        |                                   |
|--------------|---------|------------------------------------------------------------------------------------------------------------------------|-----------------------------------|
| 1416403_at   | 0.95994 | "ATP-binding cassette, sub-family B (MDR/TAP), member 10"                                                              | Abcb10                            |
| 1416404_s_at | 1.04365 | ribosomal protein S16                                                                                                  | Rps16                             |
| 1416405_at   | 0.81875 | biglycan                                                                                                               | Bgn                               |
| 1416406_at   | 0.96304 | phosphoprotein enriched in astrocytes 15                                                                               | Pea15                             |
| 1416407_at   | 0.98715 | phosphoprotein enriched in astrocytes 15                                                                               | Pea15                             |
| 1416408_at   | 1.11020 | "acyl-Coenzyme A oxidase 1, palmitoyl"                                                                                 | Acox1                             |
| 1416409_at   | 1.12796 | "acyl-Coenzyme A oxidase 1, palmitoyl"                                                                                 | Acox1                             |
| 1416410_at   | 1.09152 | "platelet-activating factor acetylhydrolase, isoform 1b, alpha1 subunit"                                               | Pafah1b3                          |
| 1416411_at   | 0.89157 | "glutathione S-transferase, mu 2"                                                                                      | Gstm2                             |
| 1416412_at   | 0.82962 | neutral sphingomyelinase (N-SMase) activation associated factor                                                        | Nsmaf                             |
| 1416413_at   | 0.91539 | cathepsin J                                                                                                            | Ctsj                              |
| 1416414_at   | 0.95550 | elastin microfibril interfacier 1                                                                                      | Emilin1                           |
| 1416415_a_at | 1.00416 | "H2A histone family, member Z /// similar to H2A histone family, member Z /// similar to H2A histone family, member Z" | H2afz /// LOC666634 /// LOC669445 |
| 1416416_x_at | 0.83799 | "glutathione S-transferase, mu 1"                                                                                      | Gstm1                             |
| 1416417_a_at | 0.95134 | "NADH dehydrogenase (ubiquinone) 1 beta subcomplex, 7"                                                                 | Ndufb7                            |
| 1416418_at   | 0.99349 | gamma-aminobutyric acid (GABA(A)) receptor-associated protein-like 1                                                   | Gabarapl1                         |
| 1416419_s_at | 0.98745 | gamma-aminobutyric acid (GABA(A)) receptor-associated protein-like 1                                                   | Gabarapl1                         |
| 1416420_a_at | 1.03566 | ribosomal protein L9 /// similar to ribosomal protein L9                                                               | Rpl9 /// LOC637379                |
| 1416421_a_at | 1.13279 | Sjogren syndrome antigen B                                                                                             | Ssb                               |
| 1416422_a_at | 1.00583 | Sjogren syndrome antigen B                                                                                             | Ssb                               |
| 1416423_x_at | 1.08813 | Sjogren syndrome antigen B                                                                                             | Ssb                               |
| 1416424_at   | 0.94790 | mannose-6-phosphate receptor binding protein 1                                                                         | M6prbp1                           |
| 1416425_at   | 1.00141 | peroxisome biogenesis factor 19                                                                                        | Pex19                             |
| 1416426_at   | 0.92956 | "RAB5A, member RAS oncogene family"                                                                                    | Rab5a                             |
| 1416427_at   | 0.88148 | cyclin I                                                                                                               | Ccni                              |
| 1416428_at   | 0.93179 | THAP domain containing 11                                                                                              | Thap11                            |
| 1416429_a_at | 0.81538 | catalase                                                                                                               | Cat                               |
| 1416430_at   | 0.83613 | catalase                                                                                                               | Cat                               |
| 1416431_at   | 0.98635 | "tubulin, beta 6"                                                                                                      | Tubb6                             |
| 1416432_at   | 1.17522 | "6-phosphofructo-2-kinase/fructose-2,6-biphosphatase 3"                                                                | Pfkfb3                            |
| 1416433_at   | 0.93164 | replication protein A2                                                                                                 | Rpa2                              |
| 1416434_at   | 0.96778 | Bcl2-like 10                                                                                                           | Bcl2l10                           |
| 1416435_at   | 0.95215 | lymphotoxin B receptor                                                                                                 | Ltbr                              |
| 1416436_a_at | 0.98623 | RIKEN cDNA 2410003P15 gene                                                                                             | 2410003P15Rik                     |
| 1416437_a_at | 1.00370 | mitogen-activated protein kinase 8 interacting protein 3                                                               | Mapk8ip3                          |
| 1416438_at   | 0.93607 | RIKEN cDNA 2410104I19 gene                                                                                             | 2410104I19Rik                     |
| 1416439_at   | 1.12551 | RIKEN cDNA 2410015N17 gene                                                                                             | 2410015N17Rik                     |
| 1416440_at   | 0.82622 | CD164 antigen                                                                                                          | Cd164                             |

1416441\_at 1.06814 plasma glutamate carboxypeptidase Pgcg  
 1416442\_at 0.63882 immediate early response 2 Ier2  
 1416443\_a\_at 1.00363 ubiquitin-like 1 (sentrin) activating enzyme E1A Uble1a  
 1416444\_at 0.84979 "elongation of very long chain fatty acids (FEN1/Elo2, SUR4/Elo3, yeast)-like 2" Elovl2  
 1416445\_at 0.96943 RIKEN cDNA 2810405J04 gene 2810405J04Rik  
 1416446\_at 1.00813 transmembrane protein 30A Tmem30a  
 1416447\_at 0.94352 transmembrane protein 30A Tmem30a  
 1416448\_at 0.99091 inosine triphosphatase (nucleoside triphosphate pyrophosphatase) Itpa  
 1416449\_x\_at 1.02086 syntaxin binding protein 2 Stxbp2  
 1416450\_at 1.03262 taube nuss Tbn  
 1416451\_s\_at 1.08058 taube nuss Tbn  
 1416452\_at 0.91379 ornithine aminotransferase Oat  
 1416453\_x\_at 1.08466 ribosomal protein S12 /// similar to 40S ribosomal protein S12 /// similar to ribosomal protein S12 /// similar to ribosomal protein S12 Rps12 /// LOC432865 /// LOC627835 /// LOC668354 /// LOC670751 /// LOC670832 /// LOC671641 /// LOC672008 /// LOC672415 /// LOC676277  
 1416454\_s\_at 0.61457 "actin, alpha 2, smooth muscle, aorta" Acta2  
 1416455\_a\_at 0.91827 "crystallin, alpha B" Cryab  
 1416456\_a\_at 0.91016 "chitinase, acidic" Chia  
 1416457\_at 0.90948 dimethylarginine dimethylaminohydrolase 2 Ddah2  
 1416458\_at 0.91022 ADP-ribosylation factor 2 Arf2  
 1416459\_at 0.82357 ADP-ribosylation factor 2 Arf2  
 1416460\_at 1.12455 myo-inositol oxygenase Miox  
 1416461\_at 0.99380 GPI-anchored membrane protein 1 Gpiap1  
 1416462\_at 0.97661 GPI-anchored membrane protein 1 Gpiap1  
 1416463\_at 1.03833 GPI-anchored membrane protein 1 Gpiap1  
 1416464\_at 0.94583 "solute carrier family 4 (anion exchanger), member 1" Slc4a1  
 1416465\_a\_at 0.98448 "vesicle-associated membrane protein, associated protein A" Vapa  
 1416466\_at 0.99208 "vesicle-associated membrane protein, associated protein A" Vapa  
 1416467\_at 1.04646 "DEAD/H (Asp-Glu-Ala-Asp/His) box polypeptide 3, X-linked" Ddx3x  
 1416468\_at 0.89587 "aldehyde dehydrogenase family 1, subfamily A1" Aldh1a1  
 1416469\_at 0.95123 leucine zipper protein 1 Luzp1  
 1416470\_a\_at 0.94391 ribophorin I Rpn1  
 1416471\_at 0.88665 choline/ethanolaminophosphotransferase 1 Cept1  
 1416472\_at 0.84509 synapse associated protein 1 Syap1  
 1416473\_a\_at 0.86569 neighbor of Punc E11 Nope  
 1416474\_at 0.91376 neighbor of Punc E11 Nope  
 1416475\_at 0.98758 ubiquitin-conjugating enzyme E2D 2 Ube2d2  
 1416476\_a\_at 0.95693 ubiquitin-conjugating enzyme E2D 2 Ube2d2  
 1416477\_at 0.90024 ubiquitin-conjugating enzyme E2D 2 Ube2d2

1416478\_a\_at 1.02834 "malate dehydrogenase 2, NAD (mitochondrial)" Mdh2  
1416479\_a\_at 1.01952 transmembrane protein 14C Tmem14c  
1416480\_a\_at 1.45071 "HIG1 domain family, member 1A" Higd1a  
1416481\_s\_at 1.40610 "HIG1 domain family, member 1A" Higd1a  
1416482\_at 0.91468 tetratricopeptide repeat domain 3 Ttc3  
1416483\_at 0.94588 tetratricopeptide repeat domain 3 Ttc3  
1416484\_at 0.85326 tetratricopeptide repeat domain 3 Ttc3  
1416485\_at 1.02917 translocase of inner mitochondrial membrane 23 homolog (yeast) Timm23  
1416486\_at 1.04783 "small inducible cytokine subfamily E, member 1" Scye1  
1416487\_a\_at 1.04403 yes-associated protein 1 Yap1  
1416488\_at 1.34148 cyclin G2 Ccng2  
1416489\_at 1.22085 phosphatidylinositol 4-kinase type 2 beta Pi4k2b  
1416490\_at 1.00874 transmembrane emp24 protein transport domain containing 6 Tmed6  
1416491\_at 0.83217 numb-like Numbl  
1416492\_at 0.95255 cyclin E1 Ccne1  
1416493\_at 0.92689 dolichyl-di-phosphooligosaccharide-protein glycotransferase Ddost  
1416494\_at 1.05169 NADH dehydrogenase (ubiquinone) Fe-S protein 5 Ndufs5  
1416495\_s\_at 1.03084 NADH dehydrogenase (ubiquinone) Fe-S protein 5 Ndufs5  
1416496\_at 0.93254 Morf4 family associated protein 1 Mrfap1  
1416497\_at 0.81407 protein disulfide isomerase associated 4 Pdia4  
1416498\_at 1.07059 peptidylprolyl isomerase C Ppic  
1416499\_a\_at 0.92206 dynactin 6 Dctn6  
1416500\_at 0.98750 "SAC1 (suppressor of actin mutations 1, homolog)-like (S. cerevisiae)" Sacm11  
1416501\_at 0.96566 3-phosphoinositide dependent protein kinase-1 Pdpk1  
1416502\_a\_at 0.99099 prolactin regulatory element binding Preb  
1416503\_at 0.94745 latexin Lxn  
1416504\_at 0.73921 Unc-51 like kinase 1 (C. elegans) Ulk1  
1416505\_at 0.44269 "nuclear receptor subfamily 4, group A, member 1" Nr4a1  
1416506\_at 1.09266 "proteasome (prosome, macropain) subunit, alpha type 6" Psma6  
1416507\_at 1.01548 transmembrane protein 4 Tmem4  
1416508\_at 1.02050 "mediator of RNA polymerase II transcription, subunit 28 homolog (yeast)"  
Med28  
1416509\_at 0.99728 transmembrane 9 superfamily member 3 Tm9sf3  
1416510\_at 0.98652 mitochondrial ribosomal protein L4 Mrpl4  
1416511\_a\_at 0.84138 CDC42 effector protein (Rho GTPase binding) 4 Cdc42ep4  
1416512\_at 0.99409 nucleotide binding protein 2 Nubp2  
1416513\_at 0.86860 "laminin, beta 2" Lamb2  
1416514\_a\_at 1.05666 "fascin homolog 1, actin bundling protein (Strongylocentrotus purpuratus)"  
Fscn1  
1416515\_at 1.05721 "fascin homolog 1, actin bundling protein (Strongylocentrotus purpuratus)"  
Fscn1  
1416516\_at 1.01914 "fascin homolog 1, actin bundling protein (Strongylocentrotus purpuratus)"  
Fscn1

1416517\_at 0.98434 patatin-like phospholipase domain containing 6 Pnpla6  
1416518\_at 0.91352 "H1 histone family, member O, oocyte-specific" H1foo  
1416519\_at 1.05474 similar to ribosomal protein L36 LOC622534  
1416520\_x\_at 1.11528 similar to ribosomal protein L36 LOC622534  
1416521\_at 0.73403 "selenoprotein W, muscle 1" Sepw1  
1416522\_a\_at 0.99776 "gene rich cluster, C10 gene" Grcc10  
1416523\_at 1.07423 "ribonuclease, RNase A family, 1 (pancreatic)" Rnase1  
1416524\_at 0.97918 speckle-type POZ protein Spop  
1416525\_at 1.04116 speckle-type POZ protein Spop  
1416526\_a\_at 1.05380 "Parkinson disease (autosomal recessive, early onset) 7" Park7  
1416527\_at 1.68743 "RAB32, member RAS oncogene family" Rab32  
1416528\_at 0.89710 SH3 domain binding glutamic acid-rich protein-like 3 Sh3bgrl3  
1416529\_at 1.02152 epithelial membrane protein 1 Emp1  
1416530\_a\_at 1.05853 purine-nucleoside phosphorylase Pnp  
1416531\_at 1.26952 glutathione S-transferase omega 1 Gsto1  
1416532\_at 1.00672 transformation/transcription domain-associated protein Trrap  
1416533\_at 1.00682 EGL nine homolog 2 (C. elegans) Egl2  
1416534\_at 0.92527 "D4, zinc and double PHD fingers family 2" Dpf2  
1416535\_at 0.93320 microspherule protein 1 /// similar to Microspherule protein 1 (58 kDa  
microspherule protein) /// similar to Microspherule protein 1 (58 kDa microspherule protein) Mcrs1 ///  
LOC433780 /// LOC666215  
1416536\_at 1.08951 melanoma associated antigen (mutated) 1 Mum1  
1416537\_at 0.90199 cysteine-rich with EGF-like domains 1 Creld1  
1416538\_at 0.73769 sialic acid acetyltransferase Sia  
1416539\_at 0.80629 sialic acid acetyltransferase Sia  
1416540\_at 0.97459 HGF-regulated tyrosine kinase substrate Hgs  
1416541\_at 0.96040 ClpB caseinolytic peptidase B homolog (E. coli) Clpb  
1416542\_at 0.83026 PHD finger protein 1 Phf1  
1416543\_at 0.97779 "nuclear factor, erythroid derived 2, like 2" Nfe2l2  
1416544\_at 0.97828 enhancer of zeste homolog 2 (Drosophila) Ezh2  
1416545\_at 0.94870 "zinc finger, DHHC domain containing 7" Zdhc7  
1416546\_a\_at 1.05017 ribosomal protein L6 Rpl6  
1416547\_at 1.05058 NADH dehydrogenase (ubiquinone) 1 beta subcomplex 3 Ndufb3  
1416548\_at 0.97502 "solute carrier family 35, member B4" Slc35b4  
1416549\_at 0.92552 "solute carrier family 35, member B4" Slc35b4  
1416550\_at 0.95607 "solute carrier family 35, member B4" Slc35b4  
1416551\_at 0.90160 "ATPase, Ca<sup>++</sup> transporting, cardiac muscle, slow twitch 2" Atp2a2  
1416552\_at 1.04872 developmental pluripotency associated 5 Dppa5  
1416553\_at 1.05667 stimulated by retinoic acid 13 Stra13  
1416554\_at 0.94834 PDZ and LIM domain 1 (elfin) Pdlim1  
1416555\_at 1.00928 etoposide induced 2.4 mRNA Ei24  
1416556\_at 0.98025 tetraspanin 31 Tspan31  
1416557\_a\_at 0.98509 elongation factor Tu GTP binding domain containing 2 Eftud2

1416558\_at 1.03271 maternal embryonic leucine zipper kinase Melk  
1416559\_at 1.05411 RIKEN cDNA 1500003O22 gene 1500003O22Rik  
1416560\_at 0.90434 "solute carrier family 13 (sodium-dependent dicarboxylate transporter), member 3" Slc13a3  
1416561\_at 1.07628 glutamic acid decarboxylase 1 Gad1  
1416562\_at 1.02334 glutamic acid decarboxylase 1 Gad1  
1416563\_at 1.28908 cytidine 5'-triphosphate synthase Ctps  
1416564\_at 0.95013 SRY-box containing gene 7 Sox7  
1416565\_at 0.91237 "cytochrome c oxidase, subunit VIb polypeptide 1" Cox6b1  
1416566\_at 1.04473 serine/threonine kinase receptor associated protein Strap  
1416567\_s\_at 0.98083 "ATP synthase, H+ transporting, mitochondrial F1 complex, epsilon subunit" Atp5e  
1416568\_a\_at 1.06827 apoptotic chromatin condensation inducer 1 Acin1  
1416569\_at 1.01311 actin-like 6A Actl6a  
1416570\_s\_at 0.99761 "G elongation factor, mitochondrial 1" Gfm1  
1416571\_at 0.94324 Tnf receptor associated factor 4 Traf4  
1416572\_at 0.82774 matrix metalloproteinase 14 (membrane-inserted) Mmp14  
1416573\_at 0.83634 protein O-fucosyltransferase 2 Pofut2  
1416574\_at 0.89993 RIKEN cDNA 5730589K01 gene 5730589K01Rik  
1416575\_at 0.97095 cell division cycle 45 homolog (S. cerevisiae)-like Cdc45l  
1416576\_at 0.98502 suppressor of cytokine signaling 3 Socs3  
1416577\_a\_at 0.94395 ring-box 1 Rbx1  
1416578\_at 0.97288 ring-box 1 Rbx1  
1416579\_a\_at 0.73870 tumor-associated calcium signal transducer 1 Tacstd1  
1416580\_a\_at 1.05904 STIP1 homology and U-Box containing protein 1 Stub1  
1416581\_at 1.05016 WD repeat domain 5 Wdr5  
1416582\_a\_at 0.94600 Bcl-associated death promoter Bad  
1416583\_at 0.99878 Bcl-associated death promoter Bad  
1416584\_at 0.90818 "mannosidase 2, alpha B2" Man2b2  
1416585\_at 1.10890 RuvB-like protein 1 Ruvbl1  
1416586\_at 0.81881 zinc finger protein 239 Zfp239  
1416587\_a\_at 0.90698 X-ray repair complementing defective repair in Chinese hamster cells 1 Xrcc1  
1416588\_at 1.01442 "protein tyrosine phosphatase, receptor type, N /// similar to Receptor-type tyrosine-protein phosphatase-like N precursor (R-PTP-N) (PTP IA-2)" Ptprn /// LOC669060  
1416589\_at 0.88887 secreted acidic cysteine rich glycoprotein Sparc  
1416590\_a\_at 1.07828 "RAB34, member of RAS oncogene family" Rab34  
1416591\_at 1.08336 "RAB34, member of RAS oncogene family" Rab34  
1416592\_at 0.64154 glutaredoxin Glrx  
1416593\_at 0.66405 glutaredoxin Glrx  
1416594\_at 1.08896 secreted frizzled-related sequence protein 1 Sfrp1  
1416595\_at 1.09657 mitochondrial ribosomal protein S22 Mrps22  
1416596\_at 1.04891 "solute carrier family 44, member 4" Slc44a4  
1416597\_at 1.02895 "hepatoma-derived growth factor, related protein 2" Hdgfrp2

1416598\_at 0.85452 GLIS family zinc finger 2 Glis2  
 1416599\_at 0.93889 GLIS family zinc finger 2 Glis2  
 1416600\_a\_at 0.82677 Down syndrome critical region homolog 1 (human) Dscr1  
 1416601\_a\_at 0.81090 Down syndrome critical region homolog 1 (human) Dscr1  
 1416602\_a\_at 1.02953 RAD52 homolog (S. cerevisiae) Rad52  
 1416603\_at 1.03195 ribosomal protein L22 /// similar to 60S ribosomal protein L22 (Heparin-binding protein HBp15) /// similar to 60S ribosomal protein L22 (Heparin-binding protein HBp15) /// similar to 60S ribosomal protein L22 (Heparin binding protein HBp15) /// similar to 60S ribosomal protein L22 (Heparin binding protein HBp15) Rpl22 /// LOC623483 /// LOC627737 /// LOC632026 /// LOC634567  
 1416604\_at 0.99629 cytochrome c-1 Cyc1  
 1416605\_at 1.16122 "nucleolar protein family A, member 2" Nola2  
 1416606\_s\_at 1.10235 "nucleolar protein family A, member 2" Nola2  
 1416607\_at 0.95028 RIKEN cDNA 4931406C07 gene 4931406C07Rik  
 1416608\_a\_at 0.91555 cDNA sequence BC004004 BC004004  
 1416609\_at 0.90755 cDNA sequence BC004004 BC004004  
 1416610\_a\_at 1.08475 chloride channel 3 Clcn3  
 1416611\_at 0.95541 secretory carrier membrane protein 2 Scamp2  
 1416612\_at 0.62304 "cytochrome P450, family 1, subfamily b, polypeptide 1" Cyp1b1  
 1416613\_at 0.85195 "cytochrome P450, family 1, subfamily b, polypeptide 1" Cyp1b1  
 1416614\_at 0.94822 CREBBP/EP300 inhibitory protein 1 Cri1  
 1416615\_at 1.04241 "caseinolytic peptidase, ATP-dependent, proteolytic subunit homolog (E. coli)" Clpp  
 1416616\_s\_at 1.02782 "caseinolytic peptidase, ATP-dependent, proteolytic subunit homolog (E. coli)" Clpp  
 1416617\_at 0.93314 acyl-CoA synthetase short-chain family member 1 Acss1  
 1416618\_at 0.91677 protoporphyrinogen oxidase Ppox  
 1416619\_at 0.90966 RIKEN cDNA 4632428N05 gene 4632428N05Rik  
 1416620\_at 0.95716 "Swi/SNF related matrix associated, actin dependent regulator of chromatin, subfamily a-like 1" Smarcal1  
 1416621\_at 1.01255 lethal giant larvae homolog 1 (Drosophila) Llg1  
 1416622\_at 1.04436 Williams-Beuren syndrome chromosome region 16 homolog (human) Wbscr16  
 1416623\_at 0.78509 thrombospondin 3 Thbs3  
 1416624\_a\_at 0.96933 ubiquitin A-52 residue ribosomal protein fusion product 1 /// similar to ubiquitin A-52 residue ribosomal protein fusion product 1 /// similar to ubiquitin A-52 residue ribosomal protein fusion product 1 Uba52 /// LOC666586 /// LOC669193 /// LOC676687  
 1416625\_at 1.07558 "serine (or cysteine) peptidase inhibitor, clade G, member 1" Serping1  
 1416626\_at 1.06514 "phospholipase A2, group IB, pancreas" Pla2g1b  
 1416627\_at 0.90011 "serine protease inhibitor, Kunitz type 1" Spint1  
 1416628\_at 1.15112 RIKEN cDNA 0610006I08 gene 0610006I08Rik  
 1416629\_at 1.19165 "solute carrier family 1 (neutral amino acid transporter), member 5" Slc1a5  
 1416630\_at 0.35327 inhibitor of DNA binding 3 Id3  
 1416631\_at 1.11790 "adaptor-related protein complex AP-4, beta 1" Ap4b1

1416632\_at 1.14614 "malic enzyme, supernatant /// similar to NADP-dependent malic enzyme (NADP-ME) (Malic enzyme 1) /// similar to NADP-dependent malic enzyme (NADP-ME) (Malic enzyme 1)" Mod1 /// LOC624892 /// LOC677317  
 1416633\_a\_at 0.93579 RIKEN cDNA 5730536A07 gene 5730536A07Rik  
 1416634\_at 1.09858 RIKEN cDNA 5730536A07 gene 5730536A07Rik  
 1416635\_at 1.05073 "sphingomyelin phosphodiesterase, acid-like 3A" Smpdl3a  
 1416636\_at 1.06985 RAS-homolog enriched in brain Rheb  
 1416637\_at 0.92163 "solute carrier family 4 (anion exchanger), member 2" Slc4a2  
 1416638\_at 0.76280 sal-like 2 (Drosophila) Sall2  
 1416639\_at 0.89079 "solute carrier family 2 (facilitated glucose transporter), member 5" Slc2a5  
 1416640\_at 1.00154 "potassium voltage-gated channel, Isk-related family, member 1-like" Kcne11  
 1416641\_at 0.97450 "ligase I, DNA, ATP-dependent" Lig1  
 1416642\_a\_at 0.99540 "tumor protein, translationally-controlled 1" Tpt1  
 1416643\_at 1.04954 "tumor protein, translationally-controlled 1" Tpt1  
 1416644\_a\_at 0.86655 "sema domain, immunoglobulin domain (Ig), short basic domain, secreted, (semaphorin) 3B" Sema3b  
 1416645\_a\_at 1.31487 alpha fetoprotein Afp  
 1416646\_at 1.18711 alpha fetoprotein Afp  
 1416647\_at 0.84100 "branched chain ketoacid dehydrogenase E1, alpha polypeptide" Bckdha  
 1416648\_at 1.00055 dynein cytoplasmic 1 heavy chain 1 Dync1h1  
 1416649\_at 1.02246 alpha 1 microglobulin/bikunin Ambp  
 1416650\_at 1.00728 ret finger protein-like 4 Rfp14  
 1416651\_at 1.05219 "zinc finger, HIT domain containing 2" Znhit2  
 1416652\_at 0.93734 asporin Asp  
 1416653\_at 1.06963 syntaxin binding protein 3A Stxbp3a  
 1416654\_at 1.05772 "solute carrier family 31, member 2" Slc31a2  
 1416655\_at 0.94959 C1GALT1-specific chaperone 1 C1galt1c1  
 1416656\_at 1.01584 chloride intracellular channel 1 Clic1  
 1416657\_at 0.98023 thymoma viral proto-oncogene 1 Akt1  
 1416658\_at 0.98776 frizzled-related protein Frzb  
 1416659\_at 0.99862 "eukaryotic translation initiation factor 3, subunit 10 (theta)" Eif3s10  
 1416660\_at 1.01806 "eukaryotic translation initiation factor 3, subunit 10 (theta)" Eif3s10  
 1416661\_at 1.06766 "eukaryotic translation initiation factor 3, subunit 10 (theta)" Eif3s10  
 1416662\_at 0.80424 sarcosine dehydrogenase Sardh  
 1416663\_at 1.03088 "NADH dehydrogenase (ubiquinone) 1 alpha subcomplex, 9" Ndufa9  
 1416664\_at 1.06229 cell division cycle 20 homolog (S. cerevisiae) Cdc20  
 1416665\_at 1.04143 demethyl-Q 7 Coq7  
 1416666\_at 1.06737 "serine (or cysteine) peptidase inhibitor, clade E, member 2" Serpine2  
 1416667\_at 1.11835 phenylalkylamine Ca<sup>2+</sup> antagonist (emopamil) binding protein Ebp  
 1416668\_at 0.99523 RIKEN cDNA 4921531G14 gene 4921531G14Rik  
 1416669\_s\_at 1.14385 nascent polypeptide-associated complex alpha polypeptide Naca  
 1416670\_at 0.86539 "SET domain, bifurcated 1" Setdb1  
 1416671\_a\_at 0.83821 mucolipin 1 Mcoln1



1416672\_s\_at 1.04333 mucolipin 1 Mcoln1  
1416673\_at 0.97168 beta-site APP-cleaving enzyme 2 Bace2  
1416674\_at 0.91298 "protein tyrosine phosphatase, receptor type, U" Ptpnu  
1416675\_s\_at 0.63014 "phospholipase C, delta 1" Plcd1  
1416676\_at 0.90949 kininogen 1 Kng1  
1416677\_at 0.87623 apolipoprotein H Apoh  
1416678\_at 0.99544 "COP9 (constitutive photomorphogenic) homolog, subunit 3 (Arabidopsis thaliana)" Cops3  
1416679\_at 0.92463 "ATP-binding cassette, sub-family D (ALD), member 3" Abcd3  
1416680\_at 0.95093 ubiquitin protein ligase E3A Ube3a  
1416681\_at 0.88834 ubiquitin protein ligase E3A Ube3a  
1416682\_at 1.01651 ubiquitin protein ligase E3A Ube3a  
1416683\_at 1.01536 plexin B2 Plxnb2  
1416684\_at 1.24200 fibrillarlin Fbl  
1416685\_s\_at 1.28945 fibrillarlin Fbl  
1416686\_at 0.97087 "procollagen lysine, 2-oxoglutarate 5-dioxygenase 2" Plod2  
1416687\_at 0.94244 "procollagen lysine, 2-oxoglutarate 5-dioxygenase 2" Plod2  
1416688\_at 1.03779 synaptosomal-associated protein 91 Snap91  
1416689\_at 1.01663 tuftelin 1 Tuft1  
1416690\_at 1.07668 GTP binding protein 2 Gtpbp2  
1416691\_at 0.98984 GTP binding protein 2 Gtpbp2  
1416692\_at 0.94615 coilin Coil  
1416693\_at 1.01803 forkhead box C2 Foxc2  
1416694\_at 1.12658 glycerol kinase 2 Gk2  
1416695\_at 0.98808 translocator protein Tspo  
1416696\_at 0.98184 "DNA segment, Chr 17, Wayne State University 104, expressed" D17Wsu104e  
1416697\_at 0.98076 dipeptidylpeptidase 4 Dpp4  
1416698\_a\_at 1.00276 CDC28 protein kinase 1b Cks1b  
1416699\_at 0.91448 RIKEN cDNA 1110008F13 gene 1110008F13Rik  
1416700\_at 0.97012 Rho family GTPase 3 Rnd3  
1416701\_at 0.99765 Rho family GTPase 3 Rnd3  
1416702\_at 0.96176 "serine (or cysteine) peptidase inhibitor, clade I, member 1" Serpini1  
1416703\_at 1.02684 mitogen activated protein kinase 14 Mapk14  
1416704\_at 0.99573 mitogen activated protein kinase 14 Mapk14  
1416705\_at 0.95461 ribulose-5-phosphate-3-epimerase Rpe  
1416706\_at 1.05844 ribulose-5-phosphate-3-epimerase Rpe  
1416707\_a\_at 1.09101 polyamine-modulated factor 1 Pmf1  
1416708\_a\_at 0.93916 GRAM domain containing 1A Gramd1a  
1416709\_a\_at 1.00493 "neugrin, neurite outgrowth associated" Ngrn  
1416710\_at 1.02823 transmembrane protein 35 Tmem35  
1416711\_at 0.92387 T-box brain gene 1 Tbr1  
1416712\_at 0.92553 peptidase D Pepd  
1416713\_at 0.84989 RIKEN cDNA 2700055K07 gene 2700055K07Rik

1416714\_at 0.98201 interferon regulatory factor 8 Irf8  
1416715\_at 1.11765 gap junction membrane channel protein beta 3 Gjb3  
1416716\_at 0.99921 embryonal Fyn-associated substrate Efs  
1416717\_at 1.10834 cysteine-rich secretory protein 2 Crisp2  
1416718\_at 0.93582 brevican Bcan  
1416719\_a\_at 1.04957 ribosomal protein S10 /// similar to ribosomal protein S10 /// similar to  
ribosomal protein S10 /// similar to ribosomal protein S10 /// similar to ribosomal protein S10 Rps10 ///  
LOC621772 /// LOC636539 /// LOC666274 /// LOC668457  
1416720\_at 1.01935 "splicing factor, arginine/serine-rich 6" Sfrs6  
1416721\_s\_at 0.99860 "splicing factor, arginine/serine-rich 6" Sfrs6  
1416722\_at 0.95921 high mobility group 20A Hmg20a  
1416723\_at 0.83891 transcription factor 4 Tcf4  
1416724\_x\_at 0.87046 transcription factor 4 Tcf4  
1416725\_at 0.91444 transcription factor 4 Tcf4  
1416726\_s\_at 1.03743 ubiquitin-conjugating enzyme E2S Ube2s  
1416727\_a\_at 0.97593 cytochrome b-5 Cyb5  
1416728\_at 1.07815 "casein kinase 2, beta polypeptide" Csnk2b  
1416729\_at 1.25957 plasminogen Plg  
1416730\_at 1.09753 RNA terminal phosphate cyclase-like 1 Rcl1  
1416731\_at 1.07248 topoisomerase (DNA) II beta Top2b  
1416732\_at 1.00255 topoisomerase (DNA) II beta Top2b  
1416733\_at 1.02686 "muskelin 1, intracellular mediator containing kelch motifs" Mkl1  
1416734\_at 0.92267 "muskelin 1, intracellular mediator containing kelch motifs" Mkl1  
1416735\_at 1.00443 N-acylsphingosine amidohydrolase 1 Asah1  
1416736\_at 1.01116 cancer susceptibility candidate 3 Casc3  
1416737\_at 1.04108 --- ---  
1416738\_at 0.98622 BRCA1 associated protein Brap  
1416739\_a\_at 0.86902 BRCA1 associated protein Brap  
1416740\_at 0.82789 "procollagen, type V, alpha 1" Col5a1  
1416741\_at 1.08124 "Procollagen, type V, alpha 1" Col5a1  
1416742\_at 1.04242 craniofacial development protein 1 Cfdp1  
1416743\_at 1.06508 UDP-N-acetylglucosamine pyrophosphorylase 1 /// similar to UDP-N-  
acetylhexosamine pyrophosphorylase Uap1 /// LOC640502  
1416744\_at 0.98751 UDP-N-acetylglucosamine pyrophosphorylase 1 Uap1  
1416745\_x\_at 1.00070 UDP-N-acetylglucosamine pyrophosphorylase 1 Uap1  
1416746\_at 1.00626 "H2A histone family, member X" H2afx  
1416747\_at 1.02266 "DNA Segment, Chr 15, Mouse Genome Informatics 27" D15Mgi27  
1416748\_a\_at 1.01523 meiotic recombination 11 homolog A (S. cerevisiae) Mre11a  
1416749\_at 0.70129 HtrA serine peptidase 1 Htra1  
1416750\_at 1.36854 "opioid receptor, sigma 1" Oprs1  
1416751\_a\_at 1.02417 DEAD (Asp-Glu-Ala-Asp) box polypeptide 20 Ddx20  
1416752\_at 1.05716 LIM domain binding 3 Ldb3  
1416753\_at 0.94733 "protein kinase, cAMP dependent regulatory, type I beta" Prkar1b

1416754\_at 0.97027 "protein kinase, cAMP dependent regulatory, type I beta" Prkar1b  
1416755\_at 0.94739 "DnaJ (Hsp40) homolog, subfamily B, member 1" Dnajb1  
1416756\_at 0.89780 "DnaJ (Hsp40) homolog, subfamily B, member 1" Dnajb1  
1416757\_at 1.11857 "Zwilch, kinetochore associated, homolog (Drosophila)" Zwilch  
1416758\_at 1.02026 Rho GTPase activating protein 27 Arhgap27  
1416759\_at 0.87089 "microtubule associated monooxygenase, calponin and LIM domain containing 1" Mical1  
1416760\_at 1.02165 UDP-N-acetyl-alpha-D-galactosamine:polypeptide N-acetylgalactosaminyltransferase-like 1 Galnt11  
1416761\_at 0.97148 --- ---  
1416762\_at 1.11428 S100 calcium binding protein A10 (calpactin) S100a10  
1416763\_at 1.08441 RIKEN cDNA G431001I09 gene G431001I09Rik  
1416764\_at 1.02666 fission 1 (mitochondrial outer membrane) homolog (yeast) Fis1  
1416765\_s\_at 1.02309 mitochondria-associated protein involved in granulocyte-macrophage colony-stimulating factor signal transduction Magmas  
1416766\_at 1.02848 MOCO sulphurase C-terminal domain containing 2 Mosc2  
1416767\_a\_at 1.00023 RIKEN cDNA 1110003E01 gene 1110003E01Rik  
1416768\_at 0.96525 RIKEN cDNA 1110003E01 gene 1110003E01Rik  
1416769\_s\_at 0.98629 "ATPase, H+ transporting, lysosomal V0 subunit B" Atp6v0b  
1416770\_at 0.89332 serine/threonine kinase 25 (yeast) Stk25  
1416771\_at 1.11310 trafficking protein particle complex 3 Trappc3  
1416772\_at 0.84761 carnitine palmitoyltransferase 2 Cpt2  
1416773\_at 0.89011 wee 1 homolog (S. pombe) Wee1  
1416774\_at 0.82291 wee 1 homolog (S. pombe) Wee1  
1416775\_at 0.85484 RIKEN cDNA 2310004L02 gene 2310004L02Rik  
1416776\_at 0.99687 "crystallin, mu" Crym  
1416777\_at 1.05565 CEA-related cell adhesion molecule 12 Ceacam12  
1416778\_at 0.83101 serum deprivation response Sdpr  
1416779\_at 0.85289 serum deprivation response Sdpr  
1416780\_at 0.83601 "phosphofructokinase, muscle" Pfkf  
1416781\_at 0.95155 PRA1 domain family 2 Praf2  
1416782\_s\_at 0.92330 PRA1 domain family 2 Praf2  
1416783\_at 1.06036 tachykinin 1 Tac1  
1416784\_at 0.96815 phosphoglycerate kinase 2 Pgk2  
1416785\_at 0.97702 Kv channel-interacting protein 1 Kcnip1  
1416786\_at 0.82715 "activin A receptor, type 1" Acvr1  
1416787\_at 0.85847 "activin A receptor, type 1" Acvr1  
1416788\_a\_at 1.00066 "isocitrate dehydrogenase 3 (NAD+), gamma" Idh3g  
1416789\_at 1.08669 "isocitrate dehydrogenase 3 (NAD+), gamma" Idh3g  
1416790\_a\_at 1.09350 thymine DNA glycosylase /// similar to thymine DNA glycosylase isoform 2 /// similar to G/T mismatch-specific thymine DNA glycosylase (C-JUN leucine zipper interactive protein JZA-3) /// similar to thymine DNA glycosylase isoform 2 /// similar to G/T mismatch-specific thymine DNA glycosylase (C-JUN leucine zipper interactive protein JZA-3) Tdg /// LOC545124 ///

LOC624784 /// LOC670176 /// LOC672659

1416791\_a\_at 1.02181 nuclear RNA export factor 1 homolog (*S. cerevisiae*) Nxf1  
1416792\_at 0.97602 "protein phosphatase 1G (formerly 2C), magnesium-dependent, gamma isoform" Ppm1g  
1416793\_at 1.03986 ADP-ribosylation factor-like 6 interacting protein 2 Arl6ip2  
1416794\_at 0.98574 ADP-ribosylation factor-like 6 interacting protein 2 Arl6ip2  
1416795\_at 0.89625 "crystallin, lamda 1" Cry11  
1416796\_at 0.97636 non-catalytic region of tyrosine kinase adaptor protein 2 Nck2  
1416797\_at 0.80755 non-catalytic region of tyrosine kinase adaptor protein 2 Nck2  
1416798\_a\_at 0.97632 "expressed in non-metastatic cells 4, protein" Nme4  
1416799\_at 0.98634 "transient receptor potential cation channel, subfamily M, member 7" Trpm7  
1416800\_at 1.04744 "transient receptor potential cation channel, subfamily M, member 7" Trpm7  
1416801\_at 1.10823 "transient receptor potential cation channel, subfamily M, member 7" Trpm7  
1416802\_a\_at 0.98810 cell division cycle associated 5 Cdc5  
1416803\_at 0.89674 FK506 binding protein 7 Fkbp7  
1416804\_at 1.23284 RIKEN cDNA G430002G23 gene G430002G23Rik  
1416805\_at 1.00494 RIKEN cDNA 1110032E23 gene 1110032E23Rik  
1416806\_at 1.01049 ferredoxin reductase Fdxr  
1416807\_at 1.19304 ribosomal protein L36a Rpl36a  
1416808\_at 1.09554 nidogen 1 Nid1  
1416809\_at 1.00262 "cytochrome P450, family 3, subfamily a, polypeptide 11" Cyp3a11  
1416810\_at 1.15467 male enhanced antigen 1 Mea1  
1416811\_s\_at 1.03685 cytotoxic T lymphocyte-associated protein 2 alpha /// cytotoxic T lymphocyte-associated protein 2 beta Ctla2a /// Ctla2b  
1416812\_at 1.02316 cytotoxic granule-associated RNA binding protein 1 Tia1  
1416813\_at 1.00388 cytotoxic granule-associated RNA binding protein 1 Tia1  
1416814\_at 0.97669 cytotoxic granule-associated RNA binding protein 1 Tia1  
1416815\_s\_at 1.01494 budding uninhibited by benzimidazoles 3 homolog (*S. cerevisiae*) Bub3  
1416816\_at 1.01197 NIMA (never in mitosis gene a)-related expressed kinase 7 Nek7  
1416817\_at 1.11463 NIMA (never in mitosis gene a)-related expressed kinase 7 Nek7  
1416818\_at 1.00052 "parvin, alpha" Parva  
1416819\_at 1.08534 cell division cycle 37 homolog (*S. cerevisiae*) Cdc37  
1416820\_at 0.94690 cell division cycle 37 homolog (*S. cerevisiae*) Cdc37  
1416821\_at 0.99375 expressed sequence 2 embryonic lethal Es2el  
1416822\_at 0.89974 expressed sequence 2 embryonic lethal Es2el  
1416823\_a\_at 0.74918 oxysterol binding protein-like 1A Osbpl1a  
1416824\_at 1.01969 RIKEN cDNA B230118H07 gene B230118H07Rik  
1416825\_at 0.90557 "syntrophin, acidic 1" Snta1  
1416826\_a\_at 0.96894 Trf (TATA binding protein-related factor)-proximal protein homolog (*Drosophila*) Trfp  
1416827\_at 1.00246 "thromboxane A synthase 1, platelet" Tbxas1  
1416828\_at 1.00198 synaptosomal-associated protein 25 Snap25  
1416829\_at 0.91470 "ATP synthase, H<sup>+</sup> transporting mitochondrial F1 complex, beta subunit" Atp5b

1416830\_at 1.02899 RIKEN cDNA 0610031J06 gene 0610031J06Rik  
1416831\_at 1.02659 neuraminidase 1 Neu1  
1416832\_at 0.70950 "solute carrier family 39 (metal ion transporter), member 8" Slc39a8  
1416833\_at 1.07824 kidney expressed gene 1 Keg1  
1416834\_x\_at 0.97566 "NADH dehydrogenase (ubiquinone) 1 beta subcomplex, 2" Ndufb2  
1416835\_s\_at 1.21369 S-adenosylmethionine decarboxylase 1 /// S-adenosylmethionine decarboxylase  
2 Amd1 /// Amd2  
1416836\_at 0.95754 low-density lipoprotein receptor-related protein 10 Lrp10  
1416837\_at 1.29242 Bcl2-associated X protein Bax  
1416838\_at 0.95433 methylmalonyl-Coenzyme A mutase Mut  
1416839\_at 1.03424 methylmalonyl-Coenzyme A mutase Mut  
1416840\_at 0.83629 Mid1 interacting protein 1 (gastrulation specific G12-like (zebrafish)) Mid1ip1  
1416841\_at 0.96036 RIKEN cDNA 1110059E24 gene 1110059E24Rik  
1416842\_at 0.99976 "glutathione S-transferase, mu 5" Gstm5  
1416843\_at 0.96618 "phosphodiesterase 6D, cGMP-specific, rod, delta" Pde6d  
1416844\_at 0.92217 protein arginine N-methyltransferase 2 Prmt2  
1416845\_at 0.86278 transmembrane protein 132A Tmem132a  
1416846\_a\_at 0.75816 PDZ domain containing RING finger 3 Pdzn3  
1416847\_s\_at 1.01385 2'-5' oligoadenylate synthetase 1D /// 2'-5' oligoadenylate synthetase 1E  
Oas1d /// Oas1e  
1416848\_at 1.04207 ubiquitin-like 5 Ubl5  
1416849\_at 0.94036 "zinc finger, CDGSH-type domain 1" Zcd1  
1416850\_s\_at 0.90633 "zinc finger, CDGSH-type domain 1" Zcd1  
1416851\_at 0.95070 Suppression of tumorigenicity 13 St13  
1416852\_a\_at 0.86136 neurochondrin Ncdn  
1416853\_at 1.00312 neurochondrin Ncdn  
1416854\_at 0.91906 "solute carrier family 34 (sodium phosphate), member 2" Slc34a2  
1416855\_at 1.04679 growth arrest specific 1 Gas1  
1416856\_at 0.99718 RIKEN cDNA 3230401D17 gene 3230401D17Rik  
1416857\_at 1.00772 stromal cell derived factor 2 Sdf2  
1416858\_a\_at 1.01783 FK506 binding protein 3 Fkbp3  
1416859\_at 1.04532 FK506 binding protein 3 Fkbp3  
1416860\_s\_at 0.96737 "inhibitor of growth family, member 1" Ing1  
1416861\_at 1.03338 signal transducing adaptor molecule (SH3 domain and ITAM motif) 1 Stam  
1416862\_at 0.90065 signal transducing adaptor molecule (SH3 domain and ITAM motif) 1 Stam  
1416863\_at 0.84775 abhydrolase domain containing 8 Abhd8  
1416864\_at 1.02234 surfeit gene 6 Surf6  
1416865\_at 0.94308 "FYVE, RhoGEF and PH domain containing 1" Fgd1  
1416866\_at 0.82146 blocked early in transport 1 homolog (S. cerevisiae) Bet1  
1416867\_at 0.91702 blocked early in transport 1 homolog (S. cerevisiae) Bet1  
1416868\_at 0.78180 "cyclin-dependent kinase inhibitor 2C (p18, inhibits CDK4)" Cdkn2c  
1416869\_x\_at 1.05328 Lck interacting transmembrane adaptor 1 Lime1  
1416870\_at 0.81887 "dynein, axonemal, light chain 4" Dnalc4

1416871\_at 1.14690 a disintegrin and metallopeptidase domain 8 Adam8  
1416872\_at 1.08142 tetraspanin 6 Tspan6  
1416873\_a\_at 0.96235 cyclin-dependent kinase 2 Cdk2  
1416874\_a\_at 0.98873 "Paf1, RNA polymerase II associated factor, homolog (S. cerevisiae)" Paf1  
1416875\_at 0.92709 "parvin, gamma" Parvg  
1416876\_at 0.84861 "parvin, gamma" Parvg  
1416877\_a\_at 0.97652 mitochondrial ribosomal protein L51 Mrpl51  
1416878\_at 1.02338 mitochondrial ribosomal protein L51 Mrpl51  
1416879\_at 1.03455 mitochondrial ribosomal protein L51 Mrpl51  
1416880\_at 0.86039 myeloid cell leukemia sequence 1 Mcl1  
1416881\_at 0.93346 myeloid cell leukemia sequence 1 Mcl1  
1416882\_at 0.83310 regulator of G-protein signalling 10 Rgs10  
1416883\_at 0.92175 cleft lip and palate associated transmembrane protein 1 Clptm1  
1416884\_at 0.99460 chromobox homolog 3 (Drosophila HP1 gamma) /// similar to chromobox homolog 3 /// similar to chromobox homolog 3 Cbx3 /// LOC629578 /// LOC672750  
1416885\_at 0.95094 RIKEN cDNA 1110038F14 gene 1110038F14Rik  
1416886\_at 1.11418 nuclear DNA binding protein C1d  
1416887\_at 0.94350 nuclear DNA binding protein C1d  
1416888\_at 1.02172 Fas (TNFRSF6)-associated via death domain Fadd  
1416889\_at 0.91713 "troponin I, skeletal, fast 2" Tnni2  
1416890\_at 1.05584 WD repeat domain 74 Wdr74  
1416891\_at 0.98704 numb gene homolog (Drosophila) Numb  
1416892\_s\_at 1.06051 RIKEN cDNA 3110001A13 gene 3110001A13Rik  
1416893\_at 0.95746 RIKEN cDNA 3110001A13 gene 3110001A13Rik  
1416894\_at 0.91819 RIKEN cDNA 1500019G21 gene 1500019G21Rik  
1416895\_at 1.14136 ephrin A1 Efna1  
1416896\_at 0.88359 ribosomal protein S6 kinase polypeptide 1 Rps6ka1  
1416897\_at 1.18071 "poly (ADP-ribose) polymerase family, member 9" Parp9  
1416898\_a\_at 0.97517 interferon regulatory factor 3 Irf3  
1416899\_at 0.93247 undifferentiated embryonic cell transcription factor 1 Utf1  
1416900\_s\_at 0.95626 growth differentiation factor 1 /// longevity assurance homolog 1 (S. cerevisiae) Gdf1 /// Lass1  
1416901\_at 1.11139 Niemann Pick type C2 Npc2  
1416902\_a\_at 0.95923 "cytochrome c oxidase, subunit Vb" Cox5b  
1416903\_at 0.83601 nucleobindin 1 Nucb1  
1416904\_at 0.89105 muscleblind-like 1 (Drosophila) Mbnl1  
1416905\_at 0.73845 guanylate cyclase activator 2a (guanylin) Guca2a  
1416906\_at 0.91797 anaphase-promoting complex subunit 5 Anapc5  
1416907\_at 1.00594 translin Tsn  
1416908\_s\_at 0.97231 translin Tsn  
1416909\_at 0.93686 RIKEN cDNA 1810008A14 gene 1810008A14Rik  
1416910\_at 1.02667 "DnaJ (Hsp40) homolog, subfamily C, member 15" Dnajc15  
1416911\_a\_at 0.98253 RIKEN cDNA 6330407G11 gene 6330407G11Rik

1416912\_at 1.00036 RIKEN cDNA 6330407G11 gene 6330407G11Rik  
1416913\_at 1.05754 esterase 1 Es1  
1416914\_s\_at 0.84362 mammary tumor virus receptor 2 Mtvr2  
1416915\_at 1.03420 mutS homolog 6 (E. coli) Msh6  
1416916\_at 1.46524 E74-like factor 3 Elf3  
1416917\_at 0.93571 RIKEN cDNA 1700123O20 gene 1700123O20Rik  
1416918\_at 0.79264 "discs, large homolog 3 (Drosophila)" Dlgh3  
1416919\_a\_at 0.92827 nephronophthisis 1 (juvenile) homolog (human) Nphp1  
1416920\_at 1.08215 RNA binding motif protein 4 Rbm4  
1416921\_x\_at 1.11776 "aldolase 1, A isoform" Aldoa  
1416922\_a\_at 1.22290 BCL2/adenovirus E1B interacting protein 3-like Bnip3l  
1416923\_a\_at 1.14484 BCL2/adenovirus E1B interacting protein 3-like Bnip3l  
1416924\_at 0.99505 brain protein I3 Bri3  
1416925\_at 1.14399 karyopherin (importin) beta 1 Kpnb1  
1416926\_at 0.88702 transformation related protein 53 inducible nuclear protein 1 Trp53inp1  
1416927\_at 0.97579 transformation related protein 53 inducible nuclear protein 1 Trp53inp1  
1416928\_at 1.00191 RNA binding motif protein 12 Rbm12  
1416929\_at 1.02085 RNA binding motif protein 12 Rbm12  
1416930\_at 1.20245 "lymphocyte antigen 6 complex, locus D" Ly6d  
1416931\_at 1.03057 Ngg1 interacting factor 3-like 1 (S. pombe) Nif3l1  
1416932\_at 0.98060 component of oligomeric golgi complex 2 Cog2  
1416933\_at 0.97414 P450 (cytochrome) oxidoreductase Por  
1416934\_at 0.90958 X-linked myotubular myopathy gene 1 Mtm1  
1416935\_at 0.91906 "transient receptor potential cation channel, subfamily V, member 2" Trpv2  
1416936\_at 0.86390 apoptosis-associated tyrosine kinase Aatk  
1416937\_at 0.95585 gamma-aminobutyric acid receptor associated protein Gabarap  
1416938\_at 1.00522 coiled-coil-helix-coiled-coil-helix domain containing 1 Chchd1  
1416939\_at 1.04761 pyrophosphatase (inorganic) 1 Ppa1  
1416940\_at 1.04017 peptidylprolyl isomerase F (cyclophilin F) Ppif  
1416941\_s\_at 0.96303 Williams-Beuren syndrome chromosome region 1 homolog (human) Wbscr1  
1416942\_at 1.08674 type 1 tumor necrosis factor receptor shedding aminopeptidase regulator Arts1  
1416943\_at 1.12063 "ubiquitin-conjugating enzyme E2E 1, UBC4/5 homolog (yeast) /// similar to Ubiquitin-conjugating enzyme E2 E1 (Ubiquitin-protein ligase E1) (Ubiquitin carrier protein E1) (UbcM3)" Ube2e1 /// LOC631407  
1416944\_a\_at 0.98966 tousled-like kinase 2 (Arabidopsis) Tlk2  
1416945\_at 0.93943 prostate tumor over expressed gene 1 Ptov1  
1416946\_a\_at 0.83161 acetyl-Coenzyme A acyltransferase 1A /// acetyl-Coenzyme A acyltransferase 1B Acaa1a /// Acaa1b  
1416947\_s\_at 0.95906 acetyl-Coenzyme A acyltransferase 1A /// acetyl-Coenzyme A acyltransferase 1B Acaa1a /// Acaa1b  
1416948\_at 1.02267 mitochondrial ribosomal protein L23 Mrpl23  
1416949\_s\_at 0.99247 "solute carrier family 39 (zinc transporter), member 7" Slc39a7  
1416950\_at 1.02579 "tumor necrosis factor, alpha-induced protein 8" Tnfaip8

|              |         |                                                                                                                                                                                                                                                                                                                        |                                    |
|--------------|---------|------------------------------------------------------------------------------------------------------------------------------------------------------------------------------------------------------------------------------------------------------------------------------------------------------------------------|------------------------------------|
| 1416951_a_at | 1.04920 | "ATPase, H <sup>+</sup> transporting, lysosomal V1 subunit D"                                                                                                                                                                                                                                                          | Atp6v1d                            |
| 1416952_at   | 1.10003 | "ATPase, H <sup>+</sup> transporting, lysosomal V1 subunit D"                                                                                                                                                                                                                                                          | Atp6v1d                            |
| 1416953_at   | 0.72628 | connective tissue growth factor                                                                                                                                                                                                                                                                                        | Ctgf                               |
| 1416954_at   | 1.02612 | "solute carrier family 25 (mitochondrial carrier, dicarboxylate transporter), member 10"                                                                                                                                                                                                                               | Slc25a10                           |
| 1416955_at   | 1.00329 | "solute carrier family 25 (mitochondrial carrier, dicarboxylate transporter), member 10"                                                                                                                                                                                                                               | Slc25a10                           |
| 1416956_at   | 0.91779 | "potassium voltage-gated channel, shaker-related subfamily, beta member 2"                                                                                                                                                                                                                                             | Kcnab2                             |
| 1416957_at   | 0.94587 | "POU domain, class 2, associating factor 1"                                                                                                                                                                                                                                                                            | Pou2af1                            |
| 1416958_at   | 0.89899 | "nuclear receptor subfamily 1, group D, member 2"                                                                                                                                                                                                                                                                      | Nr1d2                              |
| 1416959_at   | 0.84209 | "nuclear receptor subfamily 1, group D, member 2"                                                                                                                                                                                                                                                                      | Nr1d2                              |
| 1416960_at   | 0.97753 | "beta-1,3-glucuronyltransferase 3 (glucuronosyltransferase I)"                                                                                                                                                                                                                                                         | B3gat3                             |
| 1416961_at   | 0.92311 | "budding uninhibited by benzimidazoles 1 homolog, beta (S. cerevisiae)"                                                                                                                                                                                                                                                | Bub1b                              |
| 1416962_at   | 1.05217 | regulator of chromosome condensation 1                                                                                                                                                                                                                                                                                 | Rcc1                               |
| 1416963_at   | 0.94231 | ubiquitin associated domain containing 1                                                                                                                                                                                                                                                                               | Ubadc1                             |
| 1416964_at   | 0.96286 | "eukaryotic elongation factor, selenocysteine-tRNA-specific"                                                                                                                                                                                                                                                           | Eefsec                             |
| 1416965_at   | 0.95382 | proprotein convertase subtilisin/kexin type 1 inhibitor                                                                                                                                                                                                                                                                | Pcsk1n                             |
| 1416966_at   | 0.84985 | "solute carrier family 22 (organic anion transporter), member 8"                                                                                                                                                                                                                                                       | Slc22a8                            |
| 1416967_at   | 1.01355 | SRY-box containing gene 2                                                                                                                                                                                                                                                                                              | Sox2                               |
| 1416968_a_at | 0.98523 | "hydroxy-delta-5-steroid dehydrogenase, 3 beta- and steroid delta-isomerase 7"                                                                                                                                                                                                                                         | Hsd3b7                             |
| 1416969_at   | 1.06044 | G two S phase expressed protein 1                                                                                                                                                                                                                                                                                      | Gtse1                              |
| 1416970_a_at | 0.92075 | "cytochrome c oxidase, subunit VIIa 2"                                                                                                                                                                                                                                                                                 | Cox7a2                             |
| 1416971_at   | 0.96989 | "cytochrome c oxidase, subunit VIIa 2"                                                                                                                                                                                                                                                                                 | Cox7a2                             |
| 1416972_at   | 1.03865 | NHP2 non-histone chromosome protein 2-like 1 (S. cerevisiae) /// similar to Nhp2 non-histone chromosome protein 2-like 1 /// similar to NHP2-like protein 1 (High mobility group-like nuclear protein 2 homolog 1) ([U4/U6.U5] tri-snRNP 15.5 kDa protein) (Sperm specific antigen 1) (Fertilization antigen 1) (FA-1) | Nhp211 /// LOC434401 /// LOC637555 |
| 1416973_at   | 1.10895 | NHP2 non-histone chromosome protein 2-like 1 (S. cerevisiae)                                                                                                                                                                                                                                                           | Nhp211                             |
| 1416974_at   | 0.97165 | signal transducing adaptor molecule (SH3 domain and ITAM motif) 2                                                                                                                                                                                                                                                      | Stam2                              |
| 1416975_at   | 0.99770 | signal transducing adaptor molecule (SH3 domain and ITAM motif) 2                                                                                                                                                                                                                                                      | Stam2                              |
| 1416976_at   | 0.88449 | signal transducing adaptor molecule (SH3 domain and ITAM motif) 2                                                                                                                                                                                                                                                      | Stam2                              |
| 1416977_at   | 1.17914 | signal transducing adaptor molecule (SH3 domain and ITAM motif) 2                                                                                                                                                                                                                                                      | Stam2                              |
| 1416978_at   | 0.62751 | "Fc receptor, IgG, alpha chain transporter"                                                                                                                                                                                                                                                                            | Fcgrt                              |
| 1416979_at   | 1.06282 | proteasome maturation protein                                                                                                                                                                                                                                                                                          | Pomp                               |
| 1416980_at   | 1.23981 | methyltransferase like 7B                                                                                                                                                                                                                                                                                              | Mettl7b                            |
| 1416981_at   | 0.80669 | forkhead box O1                                                                                                                                                                                                                                                                                                        | Foxo1                              |
| 1416982_at   | 0.76186 | forkhead box O1                                                                                                                                                                                                                                                                                                        | Foxo1                              |
| 1416983_s_at | 0.76468 | forkhead box O1                                                                                                                                                                                                                                                                                                        | Foxo1                              |
| 1416984_at   | 0.97059 | mitochondrial ribosomal protein S18A                                                                                                                                                                                                                                                                                   | Mrps18a                            |
| 1416985_at   | 0.85156 | signal-regulatory protein alpha                                                                                                                                                                                                                                                                                        | Sirpa                              |
| 1416986_a_at | 0.96188 | signal-regulatory protein alpha                                                                                                                                                                                                                                                                                        | Sirpa                              |



1416987\_at 1.06256 elongation protein 4 homolog (S. cerevisiae) Elp4  
1416988\_at 0.94243 mutS homolog 2 (E. coli) Msh2  
1416989\_at 0.93921 vacuolar protein sorting 53 (yeast) Vps53  
1416990\_at 0.99088 retinoid X receptor beta Rxrb  
1416991\_at 0.95611 mitochondrial translation optimization 1 homolog (S. cerevisiae) Mto1  
1416992\_at 0.89363 manic fringe homolog (Drosophila) Mfng  
1416993\_at 0.89816 component of oligomeric golgi complex 4 Cog4  
1416994\_at 0.99012 tetratricopeptide repeat domain 1 Ttc1  
1416995\_at 0.90980 protein kinase C and casein kinase substrate in neurons 3 Pacsin3  
1416996\_at 0.95654 "TBC1 domain family, member 8" Tbc1d8  
1416997\_a\_at 0.89801 huntingtin-associated protein 1 Hap1  
1416998\_at 1.09021 RRS1 ribosome biogenesis regulator homolog (S. cerevisiae) Rrs1  
1416999\_at 0.94789 "sphingomyelin phosphodiesterase 2, neutral" Smpd2  
1417000\_at 0.61385 ankyrin repeat and BTB (POZ) domain containing 1 Abtb1  
1417001\_a\_at 1.06898 "DNA segment, Chr 4, Wayne State University 53, expressed" D4Wsu53e  
1417002\_at 0.96104 RIKEN cDNA 0610012G03 gene 0610012G03Rik  
1417003\_at 1.13587 RIKEN cDNA 0610012G03 gene /// hypothetical protein LOC638521  
0610012G03Rik /// LOC638521  
1417004\_at 0.96929 tumor susceptibility gene 101 Tsg101  
1417005\_at 1.09930 kinesin 2 Kns2  
1417006\_at 1.14155 COMM domain containing 4 Commd4  
1417007\_a\_at 0.99093 vacuolar protein sorting 4b (yeast) Vps4b  
1417008\_at 0.89886 carnitine acetyltransferase Crat  
1417009\_at 1.31110 "complement component 1, r subcomponent" C1r  
1417010\_at 1.00700 zinc finger protein 238 Zfp238  
1417011\_at 0.76459 syndecan 2 Sdc2  
1417012\_at 0.85134 syndecan 2 Sdc2  
1417013\_at 0.76005 heat shock protein 8 Hspb8  
1417014\_at 0.77810 heat shock protein 8 Hspb8  
1417015\_at 0.98438 Ras association (RalGDS/AF-6) domain family 3 Rassf3  
1417016\_at 0.99974 MAP kinase-activated protein kinase 5 Mapkapk5  
1417017\_at 0.97016 "cytochrome P450, family 17, subfamily a, polypeptide 1" Cyp17a1  
1417018\_at 0.88887 epidermal growth factor-containing fibulin-like extracellular matrix protein 2  
Efemp2  
1417019\_a\_at 1.01243 cell division cycle 6 homolog (S. cerevisiae) Cdc6  
1417020\_at 0.96508 spermatogenesis associated 4 Spata4  
1417021\_a\_at 0.99851 "sporulation protein, meiosis-specific, SPO11 homolog (S. cerevisiae) ///  
similar to Meiotic recombination protein SPO11" Spo11 /// LOC675982  
1417022\_at 0.95514 "solute carrier family 7 (cationic amino acid transporter, y+ system), member  
3" Slc7a3  
1417023\_a\_at 0.97944 "fatty acid binding protein 4, adipocyte" Fabp4  
1417024\_at 1.12587 histidyl-tRNA synthetase Hars  
1417025\_at 1.02054 "histocompatibility 2, class II antigen E beta" H2-Eb1

1417026\_at 1.01313 prefoldin 1 Pfdn1  
1417027\_at 0.80583 tripartite motif protein 2 Trim2  
1417028\_a\_at 0.77590 tripartite motif protein 2 Trim2  
1417029\_a\_at 0.75009 tripartite motif protein 2 Trim2  
1417030\_at 0.98464 RIKEN cDNA 2310028N02 gene 2310028N02Rik  
1417031\_at 1.04584 RIKEN cDNA 2310028N02 gene 2310028N02Rik  
1417032\_at 0.99189 ubiquitin-conjugating enzyme E2G 2 Ube2g2  
1417033\_at 0.93968 ubiquitin-conjugating enzyme E2G 2 Ube2g2  
1417034\_at 1.09161 trafficking protein particle complex 6A Trappc6a  
1417035\_at 1.05758 SAC3 domain containing 1 Sac3d1  
1417036\_at 0.90431 SAC3 domain containing 1 Sac3d1  
1417037\_at 1.11534 "origin recognition complex, subunit 6-like (*S. cerevisiae*)" Orc6l  
1417038\_at 0.97498 septin 9 9-Sep  
1417039\_a\_at 1.00904 cullin 7 Cul7  
1417040\_a\_at 0.87859 Bcl-2-related ovarian killer protein Bok  
1417041\_at 1.14963 RNA polymerase 1-1 Rpo1-1  
1417042\_at 1.18417 "solute carrier family 37 (glycerol-6-phosphate transporter), member 4" Slc37a4  
1417043\_at 1.05738 lecithin cholesterol acyltransferase Lcat  
1417044\_at 0.89081 leucine carboxyl methyltransferase 1 Lcmt1  
1417045\_at 1.42615 BH3 interacting domain death agonist Bid  
1417046\_at 0.99179 tumor suppressor candidate 4 Tusc4  
1417047\_at 1.06024 prominin 2 Prom2  
1417048\_at 0.92857 prominin 2 Prom2  
1417049\_at 0.91138 "Rh blood group, D antigen" Rhd  
1417050\_at 0.94949 C1q and tumor necrosis factor related protein 4 C1qtnf4  
1417051\_at 1.02550 protocadherin 8 Pcdh8  
1417052\_at 1.08888 "proteasome (prosome, macropain) subunit, beta type 3" Psmb3  
1417053\_at 1.09140 prohibitin /// similar to prohibitin /// similar to prohibitin /// similar to  
prohibitin Phb /// LOC665511 /// LOC669197 /// LOC674314  
1417054\_a\_at 1.01082 RIKEN cDNA 0610009D07 gene 0610009D07Rik  
1417055\_at 1.02668 RIKEN cDNA 0610009D07 gene 0610009D07Rik  
1417056\_at 1.13365 "proteasome (prosome, macropain) 28 subunit, alpha" Psmel  
1417057\_a\_at 1.06849 peptidylprolyl isomerase D (cyclophilin D) /// lysosomal-associated membrane  
protein 3 /// similar to peptidylprolyl isomerase D Ppid /// Lamp3 /// LOC671770  
1417058\_a\_at 1.04418 keratinocyte associated protein 2 Krtcap2  
1417059\_at 1.06626 keratinocyte associated protein 2 Krtcap2  
1417060\_at 1.00651 "protein phosphatase 1, regulatory (inhibitor) subunit 11" Ppp1r11  
1417061\_at 0.65488 "solute carrier family 40 (iron-regulated transporter), member 1" Slc40a1  
1417062\_at 0.93323 RIKEN cDNA 2810037C14 gene 2810037C14Rik  
1417063\_at 1.08170 "complement component 1, q subcomponent, beta polypeptide" C1qb  
1417064\_at 1.08118 jagunal homolog 1 (*Drosophila*) Jagn1  
1417065\_at 0.41795 early growth response 1 Egr1  
1417066\_at 0.84945 "chaperone, ABC1 activity of bc1 complex like (*S. pombe*)" Cabcl

1417067\_s\_at 1.01069 "chaperone, ABC1 activity of bc1 complex like (S. pombe)" Cabcl  
1417068\_a\_at 0.96966 "protein tyrosine phosphatase, non-receptor type 1" Ptpn1  
1417069\_a\_at 0.98054 "glia maturation factor, beta" Gmfb  
1417070\_at 0.92826 "cytochrome P450, family 4, subfamily v, polypeptide 3" Cyp4v3  
1417071\_s\_at 0.79261 "cytochrome P450, family 4, subfamily v, polypeptide 3" Cyp4v3  
1417072\_at 0.98709 "solute carrier family 22 (organic anion transporter), member 6" Slc22a6  
1417073\_a\_at 0.97526 quaking Qk  
1417074\_at 1.02746 CEA-related cell adhesion molecule 10 Ceacam10  
1417075\_at 1.16367 RIKEN cDNA 2010309E21 gene 2010309E21Rik  
1417076\_at 1.03551 "fatty acid binding protein 9, testis" Fabp9  
1417077\_at 0.96387 B-cell receptor-associated protein 29 Bcap29  
1417078\_at 1.02202 "lectin, galactose-binding, soluble 2" Lgals2  
1417079\_s\_at 1.17751 "lectin, galactose-binding, soluble 2" Lgals2  
1417080\_a\_at 1.01648 ECSIT homolog (Drosophila) Ecsit  
1417081\_a\_at 1.05681 synaptogyrin 2 Syngr2  
1417082\_at 1.05072 "acidic nuclear phosphoprotein 32 family, member B" Anp32b  
1417083\_at 1.11344 Sec61 beta subunit Sec61b  
1417084\_at 1.01686 eukaryotic translation initiation factor 4E binding protein 2 Eif4ebp2  
1417085\_at 0.96706 "aldo-keto reductase family 1, member C6" Akr1c6  
1417086\_at 0.93276 "platelet-activating factor acetylhydrolase, isoform 1b, beta1 subunit" Pafah1b1  
1417087\_at 0.88180 golgi apparatus protein 1 Glg1  
1417088\_at 0.99221 zinc finger protein 346 Zfp346  
1417089\_a\_at 0.96710 "creatine kinase, mitochondrial 1, ubiquitous" Ckmt1  
1417090\_at 0.92743 reticulocalbin 1 Rcn1  
1417091\_at 1.03333 conserved helix-loop-helix ubiquitous kinase Chuk  
1417092\_at 0.91547 parathyroid hormone receptor 1 Pthr1  
1417093\_a\_at 0.96082 "general transcription factor II H, polypeptide 4" Gtf2h4  
1417094\_at 1.04540 acyl-CoA thioesterase 7 Acot7  
1417095\_a\_at 1.02068 heat shock protein 14 Hspa14  
1417096\_at 1.26180 RIKEN cDNA 2810430M08 gene 2810430M08Rik  
1417097\_at 1.07843 mitochondrial trans-2-enoyl-CoA reductase Mecr  
1417098\_s\_at 1.15375 mitochondrial trans-2-enoyl-CoA reductase Mecr  
1417099\_at 0.96775 Ftsj homolog 1 (E. coli) Ftsj1  
1417100\_at 0.95613 CD320 antigen Cd320  
1417101\_at 0.79212 heat shock protein 2 Hspa2  
1417102\_a\_at 0.90593 "NADH dehydrogenase (ubiquinone) 1 beta subcomplex, 5" Ndufb5  
1417103\_at 1.10563 D-dopachrome tautomerase Ddt  
1417104\_at 1.06995 epithelial membrane protein 3 Emp3  
1417105\_at 1.05237 trafficking protein particle complex 2-like Trappc2l  
1417106\_at 0.93320 tumor protein D52-like 2 Tpd52l2  
1417107\_at 0.91189 tumor protein D52-like 2 Tpd52l2  
1417108\_at 0.83877 kinesin light chain 4 Klc4  
1417109\_at 0.96789 tubulointerstitial nephritis antigen-like Tinagl

|              |         |                                                                                                   |               |
|--------------|---------|---------------------------------------------------------------------------------------------------|---------------|
| 1417110_at   | 0.61379 | "mannosidase 1, alpha"                                                                            | Man1a         |
| 1417111_at   | 0.69133 | "mannosidase 1, alpha"                                                                            | Man1a         |
| 1417112_at   | 0.91362 | ADP-ribosylation factor-like 2 binding protein                                                    | Arl2bp        |
| 1417113_at   | 0.85913 | germ cell-less homolog 1 (Drosophila)                                                             | Gmcl1         |
| 1417114_at   | 0.90148 | germ cell-less homolog 1 (Drosophila)                                                             | Gmcl1         |
| 1417115_at   | 0.85461 | mitogen activated protein kinase kinase kinase 12                                                 | Map3k12       |
| 1417116_at   | 0.93430 | "solute carrier family 6 (neurotransmitter transporter, creatine), member 8"                      | Slc6a8        |
| 1417117_at   | 1.10811 | "cleavage stimulation factor, 3' pre-RNA, subunit 1"                                              | Cstf1         |
| 1417118_a_at | 1.14429 | N-acetyltransferase ARD1 homolog (S. cerevisiae)                                                  | Ard1          |
| 1417119_at   | 0.97368 | zinc finger like protein 1                                                                        | Zfp11         |
| 1417120_at   | 1.00449 | "DNA segment, Chr 4, Wayne State University 114, expressed"                                       | D4Wsu114e     |
| 1417121_at   | 0.99607 | "gamma-aminobutyric acid (GABA-A) receptor, subunit alpha 6"                                      | Gabra6        |
| 1417122_at   | 0.94956 | vav 3 oncogene                                                                                    | Vav3          |
| 1417123_at   | 0.87883 | vav 3 oncogene                                                                                    | Vav3          |
| 1417124_at   | 0.91923 | destrin                                                                                           | Dstn          |
| 1417125_at   | 1.07038 | S-adenosylhomocysteine hydrolase                                                                  | Ahcy          |
| 1417126_a_at | 1.01342 | ribosomal protein L22 like 1                                                                      | Rpl22i1       |
| 1417127_at   | 0.82753 | "homeo box, msh-like 1"                                                                           | Msx1          |
| 1417128_at   | 0.91318 | "pleckstrin homology domain containing, family O member 1"                                        | Plekho1       |
| 1417129_a_at | 0.99442 | myeloid ecotropic viral integration site-related gene 1                                           | Mrg1          |
| 1417130_s_at | 1.16747 | angiopoietin-like 4                                                                               | Angptl4       |
| 1417131_at   | 0.94829 | cell division cycle 25 homolog A (S. cerevisiae)                                                  | Cdc25a        |
| 1417132_at   | 0.93716 | cell division cycle 25 homolog A (S. cerevisiae)                                                  | Cdc25a        |
| 1417133_at   | 0.74125 | peripheral myelin protein                                                                         | Pmp22         |
| 1417134_at   | 0.98241 | serine/arginine-rich protein specific kinase 2                                                    | Srpk2         |
| 1417135_at   | 0.96342 | serine/arginine-rich protein specific kinase 2                                                    | Srpk2         |
| 1417136_s_at | 0.96954 | serine/arginine-rich protein specific kinase 2                                                    | Srpk2         |
| 1417137_at   | 1.16105 | uridine-cytidine kinase 2                                                                         | Uck2          |
| 1417138_s_at | 1.10457 | polymerase (RNA) II (DNA directed) polypeptide E                                                  | Polr2e        |
| 1417139_at   | 0.93502 | RIKEN cDNA 1700022L09 gene                                                                        | 1700022L09Rik |
| 1417140_a_at | 1.15488 | "protein tyrosine phosphatase, non-receptor type 2"                                               | Ptpn2         |
| 1417141_at   | 1.05588 | interferon gamma induced GTPase                                                                   | Igtp          |
| 1417142_at   | 0.91196 | RIKEN cDNA 4932442K08 gene                                                                        | 4932442K08Rik |
| 1417143_at   | 0.94328 | "endothelial differentiation, lysophosphatidic acid G-protein-coupled receptor, 2"                | Edg2          |
| 1417144_at   | 0.93713 | "tubulin, gamma 1"                                                                                | Tubg1         |
| 1417145_at   | 0.92986 | "nuclear transcription factor, X-box binding-like 1"                                              | Nfxl1         |
| 1417146_at   | 1.20669 | RIKEN cDNA 2410018C20 gene                                                                        | 2410018C20Rik |
| 1417147_at   | 0.84073 | RIKEN cDNA B230317C12 gene                                                                        | B230317C12Rik |
| 1417148_at   | 0.85824 | "platelet derived growth factor receptor, beta polypeptide"                                       | Pdgfrb        |
| 1417149_at   | 0.93171 | "procollagen-proline, 2-oxoglutarate 4-dioxygenase (proline 4-hydroxylase), alpha II polypeptide" | P4ha2         |

1417150\_at 1.10302 "solute carrier family 6 (neurotransmitter transporter, serotonin), member 4"  
Slc6a4

1417151\_a\_at 0.91952 neurotensin receptor 2 Ntsr2

1417152\_at 0.85594 BTB (POZ) domain containing 14A Btbd14a

1417153\_at 0.94506 BTB (POZ) domain containing 14A Btbd14a

1417154\_at 0.93889 "solute carrier family 25 (mitochondrial carrier, brain), member 14" Slc25a14

1417155\_at 0.77211 "v-myc myelocytomatosis viral related oncogene, neuroblastoma derived  
(avian)" Mycn

1417156\_at 1.11357 keratin 19 Krt19

1417157\_at 1.01524 ARP10 actin-related protein 10 homolog (*S. cerevisiae*) Actr10

1417158\_at 1.00289 ZXD family zinc finger C Zxdc

1417159\_at 1.11710 --- ---

1417160\_s\_at 1.14408 extracellular proteinase inhibitor Expi

1417161\_at 0.96398 CDK2-associated protein 2 Cdk2ap2

1417162\_at 1.04082 transmembrane BAX inhibitor motif containing 1 Tmbim1

1417163\_at 1.09287 dual specificity phosphatase 10 Dusp10

1417164\_at 1.01507 dual specificity phosphatase 10 Dusp10

1417165\_at 1.01072 methyl-CpG binding domain protein 2 Mbd2

1417166\_at 1.01778 PC4 and SFRS1 interacting protein 1 Psip1

1417167\_at 1.03317 exosome component 5 Exosc5

1417168\_a\_at 0.52594 ubiquitin specific peptidase 2 Usp2

1417169\_at 0.67345 ubiquitin specific peptidase 2 Usp2

1417170\_at 0.96257 leucine zipper transcription factor-like 1 Lztf11

1417171\_at 0.85775 IL2-inducible T-cell kinase Itk

1417172\_at 1.13782 ubiquitin-conjugating enzyme E2L 6 Ube2l6

1417173\_at 0.94076 cAMP responsive element binding protein-like 1 Creb11

1417174\_at 0.93698 RIKEN cDNA 1810021J13 gene 1810021J13Rik

1417175\_at 0.87628 "casein kinase 1, epsilon" Csnk1e

1417176\_at 0.91063 "casein kinase 1, epsilon" Csnk1e

1417177\_at 1.27653 galactokinase 1 Galk1

1417178\_at 0.93573 "GIPC PDZ domain containing family, member 2" Gipc2

1417179\_at 0.82271 tetraspanin 5 Tspan5

1417180\_at 0.94469 proprotein convertase subtilisin/kexin type 7 Pcsk7

1417181\_a\_at 0.89599 kinesin-associated protein 3 Kifap3

1417182\_at 0.92988 "DnaJ (Hsp40) homolog, subfamily A, member 2" Dnaja2

1417183\_at 0.98009 "DnaJ (Hsp40) homolog, subfamily A, member 2" Dnaja2

1417184\_s\_at 0.96683 "hemoglobin, beta adult major chain /// hemoglobin, beta adult minor chain"  
Hbb-b1 /// Hbb-b2

1417185\_at 1.09157 "lymphocyte antigen 6 complex, locus A" Ly6a

1417186\_at 1.06668 huntingtin interacting protein 2 Hip2

1417187\_at 0.98828 huntingtin interacting protein 2 Hip2

1417188\_s\_at 0.96442 huntingtin interacting protein 2 Hip2

1417189\_at 1.19405 "proteasome (prosome, macropain) 28 subunit, beta" Psme2

1417190\_at 1.27562 pre-B-cell colony-enhancing factor 1 Pbef1  
 1417191\_at 0.78152 "DnaJ (Hsp40) homolog, subfamily B, member 9" Dnajb9  
 1417192\_at 1.11930 translocase of outer mitochondrial membrane 70 homolog A (yeast)  
 Tomm70a  
 1417193\_at 0.99827 "superoxide dismutase 2, mitochondrial" Sod2  
 1417194\_at 0.96617 "superoxide dismutase 2, mitochondrial" Sod2  
 1417195\_at 0.94857 "WW, C2 and coiled-coil domain containing 2" Wwc2  
 1417196\_s\_at 0.94795 "WW, C2 and coiled-coil domain containing 2" Wwc2  
 1417197\_at 0.97949 "WW, C2 and coiled-coil domain containing 2" Wwc2  
 1417198\_at 0.94115 "WW, C2 and coiled-coil domain containing 2" Wwc2  
 1417199\_at 0.98637 RIKEN cDNA 1300007B12 gene 1300007B12Rik  
 1417200\_at 1.03172 RIKEN cDNA 1300007B12 gene 1300007B12Rik  
 1417201\_at 0.91134 "5'-nucleotidase, cytosolic II" Nt5c2  
 1417202\_s\_at 0.93927 ubiquitin-activating enzyme E1C Ube1c  
 1417203\_at 1.08829 ethylmalonic encephalopathy 1 Ethel  
 1417204\_at 0.98451 KDEL (Lys-Asp-Glu-Leu) endoplasmic reticulum protein retention receptor  
 2 Kdelr2  
 1417205\_at 0.93193 KDEL (Lys-Asp-Glu-Leu) endoplasmic reticulum protein retention receptor  
 2 Kdelr2  
 1417206\_at 1.08928 uroporphyrinogen decarboxylase Urod  
 1417207\_at 1.07443 "dishevelled 2, dsh homolog (Drosophila)" Dvl2  
 1417208\_at 0.95050 alpha-methylacyl-CoA racemase Amacr  
 1417209\_at 1.01309 SERTA domain containing 2 Sertad2  
 1417210\_at 1.10990 "eukaryotic translation initiation factor 2, subunit 3, structural gene Y-  
 linked" Eif2s3y  
 1417211\_a\_at 0.89900 RIKEN cDNA 1110032A03 gene 1110032A03Rik  
 1417212\_at 0.93000 RIKEN cDNA 9530058B02 gene 9530058B02Rik  
 1417213\_a\_at 0.93679 RNA binding motif protein 6 Rbm6  
 1417214\_at 0.76138 "RAB27b, member RAS oncogene family" Rab27b  
 1417215\_at 0.82291 "RAB27b, member RAS oncogene family" Rab27b  
 1417216\_at 1.09746 proviral integration site 2 Pim2  
 1417217\_at 0.94014 "melanoma antigen, family L, 2" Magel2  
 1417218\_at 0.88083 RIKEN cDNA 2810048G17 gene 2810048G17Rik  
 1417219\_s\_at 1.09901 "thymosin, beta 10" Tmsb10  
 1417220\_at 1.02640 fumarylacetoacetate hydrolase Fah  
 1417221\_at 0.87566 --- ---  
 1417222\_a\_at 0.88608 transmembrane protein 123 Tmem123  
 1417223\_at 0.97153 CD2 antigen (cytoplasmic tail) binding protein 2 Cd2bp2  
 1417224\_a\_at 0.87092 CD2 antigen (cytoplasmic tail) binding protein 2 Cd2bp2  
 1417225\_at 1.07670 ADP-ribosylation factor-like 6 interacting protein 5 Arl6ip5  
 1417226\_at 0.97991 F-box and WD-40 domain protein 4 Fbxw4  
 1417227\_at 1.04273 methylcrotonoyl-Coenzyme A carboxylase 1 (alpha) Mccc1  
 1417228\_at 0.96425 calpain 1 Capn1

|              |         |                                                              |               |
|--------------|---------|--------------------------------------------------------------|---------------|
| 1417229_at   | 1.02276 | calpain 1                                                    | Capn1         |
| 1417230_at   | 1.18296 | Ral GEF with PH domain and SH3 binding motif 2               | Ralgps2       |
| 1417231_at   | 1.20249 | claudin 2                                                    | Cldn2         |
| 1417232_at   | 1.13888 | claudin 2                                                    | Cldn2         |
| 1417233_at   | 1.01868 | coiled-coil-helix-coiled-coil-helix domain containing 4      | Chchd4        |
| 1417234_at   | 0.68750 | matrix metalloproteinase 11                                  | Mmp11         |
| 1417235_at   | 0.86141 | EH-domain containing 3                                       | Ehd3          |
| 1417236_at   | 0.93856 | EH-domain containing 3                                       | Ehd3          |
| 1417237_at   | 0.99761 | phospholipase D2                                             | Pld2          |
| 1417238_at   | 1.01614 | Ewing sarcoma breakpoint region 1                            | Ewsr1         |
| 1417239_at   | 1.06402 | centrin 3                                                    | Cetn3         |
| 1417240_at   | 0.86872 | zyxin                                                        | Zyx           |
| 1417241_at   | 0.90643 | EST X83328                                                   | X83328        |
| 1417242_at   | 1.00341 | DEAD (Asp-Glu-Ala-Asp) box polypeptide 48                    | Ddx48         |
| 1417243_at   | 0.95318 | RIKEN cDNA 2310065K24 gene                                   | 2310065K24Rik |
| 1417244_a_at | 1.03279 | interferon regulatory factor 7                               | Irf7          |
| 1417245_at   | 0.99497 | G protein-coupled receptor 180                               | Gpr180        |
| 1417246_at   | 1.01460 | pregnancy zone protein                                       | Pzp           |
| 1417247_at   | 0.93240 | expressed sequence AI597479                                  | AI597479      |
| 1417248_at   | 1.06120 | ralA binding protein 1                                       | Ralbp1        |
| 1417249_at   | 1.14092 | "polymerase (DNA directed), mu"                              | Polm          |
| 1417250_at   | 1.11782 | ring finger protein 12                                       | Rnf12         |
| 1417251_at   | 1.14835 | palmdelphin                                                  | Palmd         |
| 1417252_at   | 1.21615 | "5',3'-nucleotidase, cytosolic"                              | Nt5c          |
| 1417253_at   | 1.00340 | FSHD region gene 1                                           | Frg1          |
| 1417254_at   | 1.08168 | spermatogenesis associated 5                                 | Spata5        |
| 1417255_at   | 0.78749 | intraflagellar transport 140 homolog (Chlamydomonas)         | Ift140        |
| 1417256_at   | 0.96038 | matrix metalloproteinase 13                                  | Mmp13         |
| 1417257_at   | 0.89696 | carboxyl ester lipase                                        | Cel           |
| 1417258_at   | 1.06158 | chaperonin subunit 5 (epsilon)                               | Cct5          |
| 1417259_a_at | 1.01419 | "capping protein (actin filament) muscle Z-line, beta"       | Capzb         |
| 1417260_at   | 0.96188 | U2 small nuclear ribonucleoprotein auxiliary factor (U2AF) 2 | U2af2         |
| 1417261_at   | 0.93696 | mbt domain containing 1                                      | Mbtd1         |
| 1417262_at   | 1.09336 | prostaglandin-endoperoxide synthase 2                        | Ptgs2         |
| 1417263_at   | 1.24440 | prostaglandin-endoperoxide synthase 2                        | Ptgs2         |
| 1417264_at   | 0.87241 | "coenzyme Q5 homolog, methyltransferase (yeast)"             | Coq5          |
| 1417265_s_at | 0.98244 | "coenzyme Q5 homolog, methyltransferase (yeast)"             | Coq5          |
| 1417266_at   | 1.02135 | chemokine (C-C motif) ligand 6                               | Ccl6          |
| 1417267_s_at | 1.17349 | FK506 binding protein 11                                     | Fkbp11        |
| 1417268_at   | 1.45882 | CD14 antigen                                                 | Cd14          |
| 1417269_at   | 1.03316 | cyclin-dependent kinase 9 (CDC2-related kinase)              | Cdk9          |
| 1417270_at   | 1.20914 | WD repeat domain 12                                          | Wdr12         |
| 1417271_a_at | 0.99485 | endoglin                                                     | Eng           |

1417272\_at 0.75434 RIKEN cDNA 9130005N14 gene 9130005N14Rik  
1417273\_at 0.77880 "pyruvate dehydrogenase kinase, isoenzyme 4" Pdk4  
1417274\_at 1.08655 small nuclear ribonucleoprotein polypeptide A Snrpa  
1417275\_at 1.00181 "myelin and lymphocyte protein, T-cell differentiation protein" Mal  
1417276\_at 0.86732 tubby-like protein 2 Tulp2  
1417277\_at 0.92550 "cytochrome P450, family 4, subfamily f, polypeptide 16" Cyp4f16  
1417278\_a\_at 0.98806 naked cuticle 1 homolog (Drosophila) /// similar to naked cuticle 1 homolog ///  
similar to naked cuticle 1 homolog Nkd1 /// LOC634379 /// LOC671838  
1417279\_at 0.71255 "inositol 1,4,5-triphosphate receptor 1" Itpr1  
1417280\_at 1.15011 "solute carrier family 17 (sodium phosphate), member 1" Slc17a1  
1417281\_a\_at 0.98620 matrix metalloproteinase 23 Mmp23  
1417282\_at 1.05930 matrix metalloproteinase 23 Mmp23  
1417283\_at 0.77308 Ly6/neurotoxin 1 Lynx1  
1417284\_at 0.92796 mitogen-activated protein kinase associated protein 1 Mapkap1  
1417285\_a\_at 0.91675 "NADH dehydrogenase (ubiquinone) 1 alpha subcomplex, 5" Ndufa5  
1417286\_at 0.94089 "NADH dehydrogenase (ubiquinone) 1 alpha subcomplex, 5" Ndufa5  
1417287\_at 0.94451 histocompatibility 13 H13  
1417288\_at 1.14815 "pleckstrin homology domain-containing, family A (phosphoinositide binding  
specific) member 2" Plekha2  
1417289\_at 1.06316 "pleckstrin homology domain-containing, family A (phosphoinositide binding  
specific) member 2" Plekha2  
1417290\_at 0.93216 leucine-rich alpha-2-glycoprotein 1 Lrg1  
1417291\_at 1.01050 "tumor necrosis factor receptor superfamily, member 1a" Tnfrsf1a  
1417292\_at 1.08552 interferon gamma inducible protein 47 Ifi47  
1417293\_at 0.88217 heparan sulfate 6-O-sulfotransferase 1 Hs6st1  
1417294\_at 0.89341 "aldo-keto reductase family 7, member A5 (aflatoxin aldehyde reductase)"  
Akr7a5  
1417295\_at 1.09610 metastasis associated 1 Mta1  
1417296\_at 1.02234 activating transcription factor 1 Atf1  
1417297\_at 1.03043 "inositol 1,4,5-triphosphate receptor 3" Itpr3  
1417298\_at 1.01554 emopamil binding protein-like Ebpl  
1417299\_at 1.19431 NIMA (never in mitosis gene a)-related expressed kinase 2 Nek2  
1417300\_at 1.10560 "sphingomyelin phosphodiesterase, acid-like 3B" Smpdl3b  
1417301\_at 0.79249 frizzled homolog 6 (Drosophila) Fzd6  
1417302\_at 1.16353 REST corepressor 2 Rcor2  
1417303\_at 1.52229 mevalonate (diphospho) decarboxylase Mvd  
1417304\_at 0.94354 chordin Chrd  
1417305\_at 0.76976 SPEG complex locus Speg  
1417306\_at 1.14477 tyrosine kinase 2 Tyk2  
1417307\_at 0.93475 "dystrophin, muscular dystrophy" Dmd  
1417308\_at 1.04527 "pyruvate kinase, muscle" Pkm2  
1417309\_at 0.99176 "transducer of ERBB2, 2" Tob2  
1417310\_at 0.87896 "transducer of ERBB2, 2" Tob2



1417311\_at 0.82916 cysteine rich protein 2 Crip2  
1417312\_at 1.02060 dickkopf homolog 3 (Xenopus laevis) Dkk3  
1417313\_at 1.07047 "LSM7 homolog, U6 small nuclear RNA associated (S. cerevisiae)" Lsm7  
1417314\_at 0.92738 complement factor B Cfb  
1417315\_at 0.92120 GRIP1 associated protein 1 Gripap1  
1417316\_at 1.02592 thioesterase superfamily member 2 Them2  
1417317\_s\_at 1.01072 ribosomal protein L35a Rpl35a  
1417318\_at 0.95392 deleted in bladder cancer 1 (human) Dbc1  
1417319\_at 0.79120 poliovirus receptor-related 3 Pvr13  
1417320\_at 1.07464 "GrpE-like 1, mitochondrial" Grpel1  
1417321\_at 0.95817 "DNA segment, Chr 4, Wayne State University 132, expressed" D4Wsu132e  
1417322\_at 1.03085 deoxyhypusine hydroxylase/monooxygenase Dohh  
1417323\_at 1.02608 proline/serine-rich coiled-coil 1 Psrc1  
1417324\_at 0.97621 microtubule associated serine/threonine kinase 2 Mast2  
1417325\_at 0.97057 beta-transducin repeat containing protein Btrc  
1417326\_a\_at 0.94631 anaphase promoting complex subunit 11 homolog (yeast) Anapc11  
1417327\_at 0.92789 caveolin 2 Cav2  
1417328\_at 0.97977 "excision repair cross-complementing rodent repair deficiency, complementation group 1" Ercc1  
1417329\_at 0.91471 "solute carrier family 23 (nucleobase transporters), member 2" Slc23a2  
1417330\_at 0.95548 "solute carrier family 23 (nucleobase transporters), member 2" Slc23a2  
1417331\_a\_at 0.91101 ADP-ribosylation factor-like 6 Arl6  
1417332\_at 0.88273 "regulatory factor X, 2 (influences HLA class II expression)" Rfx2  
1417333\_at 0.99946 RAS p21 protein activator 4 Rasa4  
1417334\_at 0.99548 serine/threonine kinase 19 Stk19  
1417335\_at 0.88248 "sulfotransferase family, cytosolic, 2B, member 1" Sult2b1  
1417336\_a\_at 0.88069 synaptotagmin-like 4 Sytl4  
1417337\_at 0.95853 erythrocyte protein band 4.2 Epb4.2  
1417338\_at 1.11908 erythrocyte protein band 4.2 Epb4.2  
1417339\_a\_at 0.96066 "dynein light chain LC8-type 1 /// similar to dynein, cytoplasmic, light peptide /// similar to dynein, cytoplasmic, light peptide /// similar to dynein, cytoplasmic, light peptide" Dynll1 /// LOC627788 /// LOC637840 /// LOC672375  
1417340\_at 1.04784 thioredoxin-like 2 Txnl2  
1417341\_a\_at 1.02132 "protein phosphatase 1, regulatory (inhibitor) subunit 2" Ppp1r2  
1417342\_at 1.02336 "protein phosphatase 1, regulatory (inhibitor) subunit 2" Ppp1r2  
1417343\_at 1.02118 FXYD domain-containing ion transport regulator 6 Fxyd6  
1417344\_at 0.98554 RIKEN cDNA 2900064A13 gene 2900064A13Rik  
1417345\_at 1.06515 RIKEN cDNA 2900064A13 gene 2900064A13Rik  
1417346\_at 0.96692 PYD and CARD domain containing Pycard  
1417347\_at 0.92608 PYD and CARD domain containing Pycard  
1417348\_at 1.04776 RIKEN cDNA 2310039H08 gene 2310039H08Rik  
1417349\_at 1.01651 pallidin Pldn  
1417350\_at 1.03282 pallidin Pldn

1417351\_a\_at 1.14762 small nuclear ribonucleoprotein polypeptide A' Snrpa1  
1417352\_s\_at 1.24863 small nuclear ribonucleoprotein polypeptide A' Snrpa1  
1417353\_x\_at 1.11259 small nuclear ribonucleoprotein polypeptide A' Snrpa1  
1417354\_at 0.96325 endoplasmic reticulum chaperone SIL1 homolog (S. cerevisiae) Sil1  
1417355\_at 0.96069 paternally expressed 3 Peg3  
1417356\_at 0.90423 paternally expressed 3 Peg3  
1417357\_at 1.00768 emerlin Emd  
1417358\_s\_at 0.74323 sorbin and SH3 domain containing 1 Sorbs1  
1417359\_at 1.09867 microfibrillar-associated protein 2 Mfap2  
1417360\_at 1.01930 mutL homolog 1 (E. coli) Mlh1  
1417361\_at 0.99013 ankyrin repeat and SOCS box-containing protein 3 Asb3  
1417362\_at 0.92871 Rhesus blood group-associated C glycoprotein Rhcg  
1417363\_at 0.96095 zinc finger protein 61 Zfp61  
1417364\_at 1.03786 eukaryotic translation elongation factor 1 gamma Eef1g  
1417365\_a\_at 1.06049 calmodulin 1 Calm1  
1417366\_s\_at 1.14226 calmodulin 1 Calm1  
1417367\_at 0.97182 "protein phosphatase 2 (formerly 2A), catalytic subunit, alpha isoform" Ppp2ca  
1417368\_s\_at 1.04521 "NADH dehydrogenase (ubiquinone) 1 alpha subcomplex, 2" Ndufa2  
1417369\_at 0.95611 hydroxysteroid (17-beta) dehydrogenase 4 Hsd17b4  
1417370\_at 0.96654 "trefoil factor 3, intestinal" Tff3  
1417371\_at 1.06963 pellino 1 Peli1  
1417372\_a\_at 0.97971 pellino 1 Peli1  
1417373\_a\_at 1.01068 "tubulin, alpha 4" Tuba4  
1417374\_at 1.02877 "tubulin, alpha 4" Tuba4  
1417375\_at 0.93934 "tubulin, alpha 4" Tuba4  
1417376\_a\_at 0.82472 "immunoglobulin superfamily, member 4A" Igsf4a  
1417377\_at 0.90262 "immunoglobulin superfamily, member 4A" Igsf4a  
1417378\_at 0.89497 "immunoglobulin superfamily, member 4A" Igsf4a  
1417379\_at 1.02261 IQ motif containing GTPase activating protein 1 Iqgap1  
1417380\_at 1.02316 IQ motif containing GTPase activating protein 1 Iqgap1  
1417381\_at 0.90026 "complement component 1, q subcomponent, alpha polypeptide" C1qa  
1417382\_at 0.90213 ectonucleoside triphosphate diphosphohydrolase 5 Entpd5  
1417383\_at 0.94699 ectonucleoside triphosphate diphosphohydrolase 5 Entpd5  
1417384\_at 0.83728 ectonucleoside triphosphate diphosphohydrolase 5 Entpd5  
1417385\_at 1.05674 aminopeptidase puromycin sensitive Npepps  
1417386\_at 1.13858 aminopeptidase puromycin sensitive Npepps  
1417387\_at 1.01368 "mediator of RNA polymerase II transcription, subunit 31 homolog (yeast)"  
Med31  
1417388\_at 0.91041 brain expressed X-linked 2 Bex2  
1417389\_at 0.83436 glypican 1 Gpc1  
1417390\_at 1.02376 XPA binding protein 1 Xab1  
1417391\_a\_at 1.07215 interleukin 16 Il16  
1417392\_a\_at 0.57932 "solute carrier family 7 (cationic amino acid transporter, y+ system), member

## 7" Slc7a7

|              |         |                                                                                                                                                                                                                           |                                    |
|--------------|---------|---------------------------------------------------------------------------------------------------------------------------------------------------------------------------------------------------------------------------|------------------------------------|
| 1417393_a_at | 0.94534 | C1q domain containing 2                                                                                                                                                                                                   | C1qdc2                             |
| 1417394_at   | 1.01146 | Kruppel-like factor 4 (gut)                                                                                                                                                                                               | Klf4                               |
| 1417395_at   | 0.85248 | Kruppel-like factor 4 (gut)                                                                                                                                                                                               | Klf4                               |
| 1417396_at   | 0.86996 | podocalyxin-like                                                                                                                                                                                                          | Podxl                              |
| 1417397_at   | 0.93772 | "solute carrier family 9 (sodium/hydrogen exchanger), member 1"                                                                                                                                                           | Slc9a1                             |
| 1417398_at   | 0.99914 | related RAS viral (r-ras) oncogene homolog 2                                                                                                                                                                              | Rras2                              |
| 1417399_at   | 0.85753 | growth arrest specific 6                                                                                                                                                                                                  | Gas6                               |
| 1417400_at   | 1.19874 | retinoic acid induced 14                                                                                                                                                                                                  | Rai14                              |
| 1417401_at   | 1.17654 | retinoic acid induced 14                                                                                                                                                                                                  | Rai14                              |
| 1417402_at   | 0.96078 | RIKEN cDNA 1190017O12 gene                                                                                                                                                                                                | 1190017O12Rik                      |
| 1417403_at   | 1.49220 | "ELOVL family member 6, elongation of long chain fatty acids (yeast)"                                                                                                                                                     | Elovl6                             |
| 1417404_at   | 1.52747 | "ELOVL family member 6, elongation of long chain fatty acids (yeast)"                                                                                                                                                     | Elovl6                             |
| 1417405_at   | 0.85255 | START domain containing 3                                                                                                                                                                                                 | Stard3                             |
| 1417406_at   | 1.08882 | SERTA domain containing 1                                                                                                                                                                                                 | Sertad1                            |
| 1417407_at   | 1.02281 | F-box and leucine-rich repeat protein 14                                                                                                                                                                                  | Fbxl14                             |
| 1417408_at   | 1.12619 | coagulation factor III                                                                                                                                                                                                    | F3                                 |
| 1417409_at   | 0.69016 | Jun oncogene                                                                                                                                                                                                              | Jun                                |
| 1417410_s_at | 1.00937 | "protein kinase C, iota"                                                                                                                                                                                                  | Prkci                              |
| 1417411_at   | 1.09540 | nucleosome assembly protein 1-like 5                                                                                                                                                                                      | Nap115                             |
| 1417412_at   | 0.92054 | factor 8-associated gene A                                                                                                                                                                                                | F8a                                |
| 1417413_at   | 0.89159 | CUB and zona pellucida-like domains 1                                                                                                                                                                                     | Cuzd1                              |
| 1417414_at   | 1.10586 | septin 3                                                                                                                                                                                                                  | 3-Sep                              |
| 1417415_at   | 0.88485 | "solute carrier family 6 (neurotransmitter transporter, dopamine), member 3"                                                                                                                                              | Slc6a3                             |
| 1417416_at   | 0.91322 | "potassium voltage-gated channel, shaker-related subfamily, member 1"                                                                                                                                                     | Kcna1                              |
| 1417417_a_at | 0.97493 | "cytochrome c oxidase, subunit VI a, polypeptide 1"                                                                                                                                                                       | Cox6a1                             |
| 1417418_s_at | 0.96376 | "cytochrome c oxidase, subunit VI a, polypeptide 1 /// similar to Cytochrome c oxidase polypeptide VIa-liver, mitochondrial precursor /// similar to Cytochrome c oxidase polypeptide VIa-liver, mitochondrial precursor" | Cox6a1 /// LOC665806 /// LOC673054 |
| 1417419_at   | 1.56313 | cyclin D1                                                                                                                                                                                                                 | Ccnd1                              |
| 1417420_at   | 1.37958 | cyclin D1                                                                                                                                                                                                                 | Ccnd1                              |
| 1417421_at   | 0.85954 | S100 calcium binding protein A1                                                                                                                                                                                           | S100a1                             |
| 1417422_at   | 0.94605 | glycine N-methyltransferase                                                                                                                                                                                               | Gnmt                               |
| 1417423_at   | 0.94560 | "glutamate receptor, ionotropic, N-methyl D-aspartate-associated protein 1 (glutamate binding)"                                                                                                                           | Grina                              |
| 1417424_at   | 0.95709 | immediate early response 3 interacting protein 1                                                                                                                                                                          | Ier3ip1                            |
| 1417425_at   | 1.05255 | Prkr interacting protein 1 (IL11 inducible)                                                                                                                                                                               | Prkrip1                            |
| 1417426_at   | 1.02987 | "proteoglycan 1, secretory granule"                                                                                                                                                                                       | Prg1                               |
| 1417427_at   | 1.01535 | RIKEN cDNA 1500026D16 gene                                                                                                                                                                                                | 1500026D16Rik                      |
| 1417428_at   | 1.01514 | "guanine nucleotide binding protein (G protein), gamma 3 subunit"                                                                                                                                                         | Gng3                               |
| 1417429_at   | 1.05388 | flavin containing monooxygenase 1                                                                                                                                                                                         | Fmo1                               |
| 1417430_at   | 0.71039 | cerebellar degeneration-related 2                                                                                                                                                                                         | Cdr2                               |

1417431\_a\_at 0.95858 sphingosine kinase 2 Sphk2  
1417432\_a\_at 1.01535 "guanine nucleotide binding protein, beta 1" Gnb1  
1417433\_at 0.92203 lysophospholipase 2 Lypla2  
1417434\_at 1.26026 "glycerol phosphate dehydrogenase 2, mitochondrial" Gpd2  
1417435\_at 0.88645 like-glycosyltransferase Large  
1417436\_at 1.01367 like-glycosyltransferase Large  
1417437\_at 0.95330 X-ray repair complementing defective repair in Chinese hamster cells 6 Xrcc6  
1417438\_at 0.89859 retinol dehydrogenase 14 (all-trans and 9-cis) Rdh14  
1417439\_at 0.68583 "CD248 antigen, endosialin" Cd248  
1417440\_at 0.91035 AT rich interactive domain 1A (Swi1 like) /// similar to AT rich interactive domain 1A isoform a Arid1a /// LOC675933  
1417441\_at 0.98643 "DnaJ (Hsp40) homolog, subfamily C, member 12" Dnajc12  
1417442\_a\_at 0.95172 peroxisomal biogenesis factor 3 Pex3  
1417443\_at 0.74180 cDNA sequence BC026682 BC026682  
1417444\_at 1.04530 E2F transcription factor 5 E2f5  
1417445\_at 1.04369 kinetochore associated 2 Kntc2  
1417446\_at 1.04474 "solute carrier family 12, member 4" Slc12a4  
1417447\_at 0.96839 transcription factor 21 Tcf21  
1417448\_at 0.95902 RIKEN cDNA 1810008A18 gene 1810008A18Rik  
1417449\_at 1.00673 acyl-CoA thioesterase 8 Acot8  
1417450\_a\_at 1.03419 "transforming, acidic coiled-coil containing protein 3" Tacc3  
1417451\_a\_at 0.98428 peptidylprolyl isomerase A Ppia  
1417452\_a\_at 1.06281 Finkel-Biskis-Reilly murine sarcoma virus (FBR-MuSV) ubiquitously expressed (fox derived) Fau  
1417453\_at 1.12566 cullin 4B Cul4b  
1417454\_at 0.98780 cullin 4B Cul4b  
1417455\_at 0.80670 "transforming growth factor, beta 3" Tgfb3  
1417456\_at 0.95499 glyceronephosphate O-acyltransferase Gnpat  
1417457\_at 0.98765 CDC28 protein kinase regulatory subunit 2 Cks2  
1417458\_s\_at 0.96240 CDC28 protein kinase regulatory subunit 2 Cks2  
1417459\_at 0.93565 demilune cell and parotid protein Dcpp  
1417460\_at 0.95662 interferon induced transmembrane protein 2 Ifitm2  
1417461\_at 0.96829 "CAP, adenylate cyclase-associated protein 1 (yeast)" Cap1  
1417462\_at 0.94467 "CAP, adenylate cyclase-associated protein 1 (yeast)" Cap1  
1417463\_a\_at 1.00256 RIKEN cDNA 2400001E08 gene /// hypothetical LOC433216 2400001E08Rik /// LOC433216  
1417464\_at 0.93767 "troponin C2, fast" Tnnc2  
1417465\_at 0.96479 "farnesyltransferase, CAAX box, alpha" Fnta  
1417466\_at 1.03892 --- ---  
1417467\_a\_at 0.95898 "transcriptional adaptor 3 (NGG1 homolog, yeast)-like" Tada3l  
1417468\_at 0.93644 nitrilase 1 Nit1  
1417469\_at 0.99479 nitrilase 1 Nit1  
1417470\_at 1.02142 apolipoprotein B editing complex 3 Apobec3

1417471\_s\_at 1.03663 "DNA segment, Chr 1, ERATO Doi 622, expressed" D1Ert622e  
1417472\_at 0.92200 "myosin, heavy polypeptide 9, non-muscle" Myh9  
1417473\_a\_at 0.98709 phosphopantothenoylcysteine synthetase Ppcs  
1417474\_at 1.04006 RIKEN cDNA 1500035H01 gene 1500035H01Rik  
1417475\_at 0.99709 ATPase type 13A1 Atp13a1  
1417476\_at 0.91559 F-box and WD-40 domain protein 5 Fbxw5  
1417477\_at 0.87397 gene trap locus F3b Gtlf3b  
1417478\_a\_at 0.95301 RIKEN cDNA 4930511A21 gene 4930511A21Rik  
1417479\_at 0.89946 RIKEN cDNA 4930511A21 gene 4930511A21Rik  
1417480\_at 0.89316 f-box only protein 9 Fbxo9  
1417481\_at 0.65511 receptor (calcitonin) activity modifying protein 1 Ramp1  
1417482\_at 1.03483 testis expressed gene 19 Tex19  
1417483\_at 1.18481 "nuclear factor of kappa light polypeptide gene enhancer in B-cells inhibitor,  
zeta" Nfkbiz  
1417484\_at 1.01317 integrin binding sialoprotein Ibsp  
1417485\_at 1.06844 integrin binding sialoprotein Ibsp  
1417486\_at 1.01323 src homology 2 domain-containing transforming protein D Shd  
1417487\_at 1.64743 fos-like antigen 1 Fosl1  
1417488\_at 1.60200 fos-like antigen 1 Fosl1  
1417489\_at 1.04435 neuropeptide Y receptor Y2 Npy2r  
1417490\_at 0.92910 cathepsin B Ctsb  
1417491\_at 0.79648 cathepsin B Ctsb  
1417492\_at 0.72150 cathepsin B Ctsb  
1417493\_at 0.91078 B lymphoma Mo-MLV insertion region 1 Bmi1  
1417494\_a\_at 0.90846 ceruloplasmin Cp  
1417495\_x\_at 0.95846 ceruloplasmin Cp  
1417496\_at 0.98932 ceruloplasmin Cp  
1417497\_at 0.72817 ceruloplasmin Cp  
1417498\_at 0.89097 "serine (or cysteine) peptidase inhibitor, clade F, member 2" Serpinf2  
1417499\_at 1.10354 translocase of inner mitochondrial membrane 10 homolog (yeast) Timm10  
1417500\_a\_at 0.95144 "transglutaminase 2, C polypeptide" Tgm2  
1417501\_at 1.25918 F-box only protein 6b Fbxo6b  
1417502\_at 0.79077 tetraspanin 7 Tspan7  
1417503\_at 0.92979 replication factor C (activator 1) 2 Rfc2  
1417504\_at 0.92849 calbindin-28K Calb1  
1417505\_s\_at 1.02361 "interleukin 11 receptor, alpha chain 1 /// interleukin 11 receptor, alpha chain  
2 /// similar to interleukin 11 receptor, alpha chain 2" Il11ra1 /// Il11ra2 /// LOC621887  
1417506\_at 1.06236 geminin Gmnn  
1417507\_at 0.87295 cytochrome b-561 Cyb561  
1417508\_at 1.03664 ring finger protein (C3HC4 type) 19 Rnf19  
1417509\_at 1.14711 ring finger protein (C3HC4 type) 19 Rnf19  
1417510\_at 0.91163 vacuolar protein sorting 4a (yeast) Vps4a  
1417511\_at 1.14273 Ly1 antibody reactive clone Lyar

|              |         |                                                                                 |         |
|--------------|---------|---------------------------------------------------------------------------------|---------|
| 1417512_at   | 0.98208 | ecotropic viral integration site 5                                              | Evi5    |
| 1417513_at   | 0.94150 | ecotropic viral integration site 5                                              | Evi5    |
| 1417514_at   | 1.03026 | "synovial sarcoma, X breakpoint 2 interacting protein"                          | Ssx2ip  |
| 1417515_at   | 0.97662 | U7 snRNP-specific Sm-like protein LSM10                                         | Lsm10   |
| 1417516_at   | 1.21066 | DNA-damage inducible transcript 3                                               | Ddit3   |
| 1417517_at   | 0.98652 | pleiomorphic adenoma gene-like 2                                                | Plagl2  |
| 1417518_at   | 1.03552 | pleiomorphic adenoma gene-like 2                                                | Plagl2  |
| 1417519_at   | 0.99598 | pleiomorphic adenoma gene-like 2                                                | Plagl2  |
| 1417520_at   | 0.67652 | "nuclear factor, erythroid derived 2, like 3"                                   | Nfe2l3  |
| 1417521_at   | 0.85686 | ephrin A2                                                                       | Efna2   |
| 1417522_at   | 0.83423 | F-box only protein 32                                                           | Fbxo32  |
| 1417523_at   | 1.01635 | pleckstrin                                                                      | Plek    |
| 1417524_at   | 0.60007 | cornichon homolog 2 (Drosophila)                                                | Cnih2   |
| 1417525_at   | 1.21613 | heart and neural crest derivatives expressed transcript 1                       | Hand1   |
| 1417526_at   | 0.83420 | poly(rC) binding protein 3                                                      | Pcbp3   |
| 1417527_at   | 0.83521 | "adaptor-related protein complex 3, mu 2 subunit"                               | Ap3m2   |
| 1417528_at   | 1.17943 | sperm associated antigen 6                                                      | Spag6   |
| 1417529_at   | 0.98391 | "RAB33A, member of RAS oncogene family"                                         | Rab33a  |
| 1417530_a_at | 1.13107 | signal recognition particle 9                                                   | Srp9    |
| 1417531_at   | 0.71164 | "cytochrome P450, family 2, subfamily j, polypeptide 5"                         | Cyp2j5  |
| 1417532_at   | 1.14296 | "cytochrome P450, family 2, subfamily j, polypeptide 5"                         | Cyp2j5  |
| 1417533_a_at | 0.71244 | integrin beta 5                                                                 | Itgb5   |
| 1417534_at   | 0.68920 | integrin beta 5                                                                 | Itgb5   |
| 1417535_at   | 0.92725 | F-box only protein 25                                                           | Fbxo25  |
| 1417536_at   | 1.06612 | "zinc finger, matrin type 2"                                                    | Zmat2   |
| 1417537_at   | 0.96747 | "zinc finger, matrin type 2"                                                    | Zmat2   |
| 1417538_at   | 0.98252 | "solute carrier family 35 (CMP-sialic acid transporter), member 1"              | Slc35a1 |
| 1417539_at   | 0.93646 | "solute carrier family 35 (CMP-sialic acid transporter), member 1"              | Slc35a1 |
| 1417540_at   | 1.07094 | E74-like factor 1                                                               | Elf1    |
| 1417541_at   | 1.02714 | "helicase, lymphoid specific"                                                   | Hells   |
| 1417542_at   | 0.87377 | "ribosomal protein S6 kinase, polypeptide 2"                                    | Rps6ka2 |
| 1417543_at   | 0.96257 | "ribosomal protein S6 kinase, polypeptide 2"                                    | Rps6ka2 |
| 1417544_a_at | 0.94737 | flotillin 2                                                                     | Flot2   |
| 1417545_at   | 0.88269 | "transient receptor potential cation channel, subfamily V, member 4"            | Trpv4   |
| 1417546_at   | 0.97443 | "interleukin 2 receptor, beta chain"                                            | Il2rb   |
| 1417547_at   | 0.98146 | squamous cell carcinoma antigen recognized by T-cells 3                         | Sart3   |
| 1417548_at   | 1.00292 | squamous cell carcinoma antigen recognized by T-cells 3                         | Sart3   |
| 1417549_at   | 0.74690 | zinc finger protein 68                                                          | Zfp68   |
| 1417550_a_at | 0.98486 | germ cell-specific gene 1                                                       | Gsg1    |
| 1417551_at   | 1.12898 | "ceroid lipofuscinosis, neuronal 3, juvenile (Batten, Spielmeier-Vogt disease)" | Cln3    |
| 1417552_at   | 0.88451 | fibroblast activation protein                                                   | Fap     |
| 1417553_at   | 1.05028 | placental specific protein 1                                                    | Plac1   |

1417554\_at 0.90917 "hydroxy-delta-5-steroid dehydrogenase, 3 beta- and steroid delta-isomerase 4"  
Hsd3b4

1417555\_at 0.94654 "ATPase family, AAA domain containing 1" Atad1

1417556\_at 1.00821 "fatty acid binding protein 1, liver" Fabp1

1417557\_at 1.01218 UBX domain containing 1 Ubx1

1417558\_at 0.92321 Fyn proto-oncogene Fyn

1417559\_at 1.08925 sideroflexin 1 Sfxn1

1417560\_at 1.02476 sideroflexin 1 Sfxn1

1417561\_at 1.00815 apolipoprotein C-I Apoc1

1417562\_at 1.21948 eukaryotic translation initiation factor 4E binding protein 1 Eif4ebp1

1417563\_at 1.02088 eukaryotic translation initiation factor 4E binding protein 1 Eif4ebp1

1417564\_at 0.98865 "cofactor required for Sp1 transcriptional activation, subunit 9" Crsp9

1417565\_at 1.07866 abhydrolase domain containing 5 Abhd5

1417566\_at 1.06931 abhydrolase domain containing 5 Abhd5

1417567\_at 0.90933 catenin beta interacting protein 1 Ctnnb1

1417568\_at 0.82173 neurocalcin delta Ncald

1417569\_at 0.84546 neurocalcin delta Ncald

1417570\_at 0.90986 anaphase promoting complex subunit 1 Anapc1

1417571\_at 1.03300 N-methylpurine-DNA glycosylase Mpg

1417572\_at 0.80416 N-methylpurine-DNA glycosylase Mpg

1417573\_at 0.97781 RIKEN cDNA 2010311D03 gene 2010311D03Rik

1417574\_at 0.73532 chemokine (C-X-C motif) ligand 12 Cxcl12

1417575\_at 0.88933 "OTU domain, ubiquitin aldehyde binding 2" Otub2

1417576\_a\_at 0.84572 "OTU domain, ubiquitin aldehyde binding 2" Otub2

1417577\_at 0.87543 "transient receptor potential cation channel, subfamily C, member 3" Trpc3

1417578\_a\_at 0.95053 GDP-mannose pyrophosphorylase A Gmppa

1417579\_x\_at 0.95555 GDP-mannose pyrophosphorylase A Gmppa

1417580\_s\_at 0.73845 selenium binding protein 1 Selenbp1

1417581\_at 0.90270 dihydroorotate dehydrogenase Dhodh

1417582\_s\_at 1.03730 dihydroorotate dehydrogenase Dhodh

1417583\_a\_at 1.03292 charged amino acid rich leucine zipper 1 Crlz1

1417584\_at 0.96626 "solute carrier family 11 (proton-coupled divalent metal ion transporters),  
member 2" Slc11a2

1417585\_at 0.83283 nucleoporin 210 Nup210

1417586\_at 0.99147 timeless homolog (Drosophila) Timeless

1417587\_at 0.91030 timeless homolog (Drosophila) Timeless

1417588\_at 1.08690 UDP-N-acetyl-alpha-D-galactosamine:polypeptide N-  
acetylgalactosaminyltransferase 3 Galnt3

1417589\_at 1.06788 UDP-N-acetyl-alpha-D-galactosamine:polypeptide N-  
acetylgalactosaminyltransferase 3 /// hypothetical protein LOC620893 Galnt3 /// LOC620893

1417590\_at 1.00704 "cytochrome P450, family 27, subfamily a, polypeptide 1" Cyp27a1

1417591\_at 1.03294 prostaglandin E synthase 2 Ptges2

1417592\_at 0.98066 FK506 binding protein 12-rapamycin associated protein 1 Frap1

1417593\_at 0.91075 tumor suppressor candidate 2 Tusc2  
1417594\_at 0.87146 G kinase anchoring protein 1 Gkap1  
1417595\_at 1.07829 mesenchyme homeobox 1 Meox1  
1417596\_at 1.01092 endothelial precursor protein B9 Eppb9  
1417597\_at 1.00713 CD28 antigen Cd28  
1417598\_a\_at 1.04340 "fragile X mental retardation gene 1, autosomal homolog" Fxr1h  
1417599\_at 0.87034 CD276 antigen Cd276  
1417600\_at 0.94168 "solute carrier family 15 (H+/peptide transporter), member 2" Slc15a2  
1417601\_at 1.07196 regulator of G-protein signaling 1 Rgs1  
1417602\_at 0.76418 period homolog 2 (Drosophila) Per2  
1417603\_at 1.09339 period homolog 2 (Drosophila) Per2  
1417604\_at 0.91132 calcium/calmodulin-dependent protein kinase I Camk1  
1417605\_s\_at 0.89578 calcium/calmodulin-dependent protein kinase I /// similar to calcium/  
calmodulin-dependent protein kinase I Camk1 /// LOC669267  
1417606\_a\_at 0.93248 calreticulin Calr  
1417607\_at 1.02096 "cytochrome c oxidase, subunit VI a, polypeptide 2" Cox6a2  
1417608\_a\_at 1.05007 ribosomal protein L13a Rpl13a  
1417609\_at 0.85829 "ubiquitin-conjugating enzyme E2A, RAD6 homolog (S. cerevisiae)" Ube2a  
1417610\_at 0.97923 apolipoprotein A-V Apoa5  
1417611\_at 0.86964 transmembrane protein 37 Tmem37  
1417612\_at 0.81048 immediate early response 5 Ier5  
1417613\_at 0.87293 immediate early response 5 Ier5  
1417614\_at 1.00160 "creatine kinase, muscle" Ckm  
1417615\_a\_at 1.11410 ribosomal protein L11 Rpl11  
1417616\_at 0.74881 "ST6 (alpha-N-acetyl-neuraminy-2,3-beta-galactosyl-1,3)-N-  
acetylgalactosaminide alpha-2,6-sialyltransferase 2" St6galnac2  
1417617\_at 1.06229 "ST6 (alpha-N-acetyl-neuraminy-2,3-beta-galactosyl-1,3)-N-  
acetylgalactosaminide alpha-2,6-sialyltransferase 2" St6galnac2  
1417618\_at 0.92386 "inter-alpha trypsin inhibitor, heavy chain 2" Itih2  
1417619\_at 1.02337 "growth arrest and DNA-damage-inducible, gamma interacting protein 1"  
Gadd45gip1  
1417620\_at 0.86929 RAS-related C3 botulinum substrate 2 Rac2  
1417621\_at 1.20110 "nuclear factor of activated T-cells, cytoplasmic, calcineurin-dependent 1"  
Nfatc1  
1417622\_at 1.09443 "solute carrier family 12, member 2" Slc12a2  
1417623\_at 1.12377 "solute carrier family 12, member 2" Slc12a2  
1417624\_at 1.05657 Ngfi-A binding protein 1 Nab1  
1417625\_s\_at 0.85012 chemokine orphan receptor 1 Cmkor1  
1417626\_at 0.67085 phosphodiesterase 4D interacting protein (myomegalin) Pde4dip  
1417627\_a\_at 0.86340 "LIM-domain containing, protein kinase" Limk1  
1417628\_at 0.92733 suppressor of Ty 6 homolog (S. cerevisiae) Supt6h  
1417629\_at 1.06106 "proline dehydrogenase /// similar to Proline oxidase, mitochondrial precursor  
(Proline dehydrogenase)" Prodh /// LOC671160



|              |         |                                                                                         |          |
|--------------|---------|-----------------------------------------------------------------------------------------|----------|
| 1417630_at   | 0.90092 | MAP kinase-interacting serine/threonine kinase 1                                        | Mknk1    |
| 1417631_at   | 0.86181 | MAP kinase-interacting serine/threonine kinase 1                                        | Mknk1    |
| 1417632_at   | 1.04259 | "ATPase, H <sup>+</sup> transporting, lysosomal V0 subunit A1"                          | Atp6v0a1 |
| 1417633_at   | 0.84354 | "superoxide dismutase 3, extracellular"                                                 | Sod3     |
| 1417634_at   | 0.92216 | "superoxide dismutase 3, extracellular"                                                 | Sod3     |
| 1417635_at   | 0.55658 | sperm autoantigenic protein 17                                                          | Spa17    |
| 1417636_at   | 1.11200 | "solute carrier family 6 (neurotransmitter transporter, glycine), member 9"             | Slc6a9   |
| 1417637_a_at | 0.94773 | high mobility group 20 B                                                                | Hmg20b   |
| 1417638_at   | 0.85014 | left right determination factor 1                                                       | Lefty1   |
| 1417639_at   | 0.79494 | "solute carrier family 22 (organic cation transporter), member 4"                       | Slc22a4  |
| 1417640_at   | 0.95981 | CD79B antigen                                                                           | Cd79b    |
| 1417641_at   | 1.04680 | UDP-N-acetyl-alpha-D-galactosamine:polypeptide N-acetylgalactosaminyltransferase-like 5 | Galntl5  |
| 1417642_at   | 0.96408 | "aldehyde dehydrogenase family 1, subfamily A3"                                         | Aldh1a3  |
| 1417643_at   | 1.10657 | testis specific gene A2                                                                 | Tsga2    |
| 1417644_at   | 0.85280 | sarcospan                                                                               | Sspn     |
| 1417645_at   | 0.85410 | sarcospan                                                                               | Sspn     |
| 1417646_a_at | 1.08505 | sorting nexin 5                                                                         | Snx5     |
| 1417647_at   | 0.98055 | sorting nexin 5                                                                         | Snx5     |
| 1417648_s_at | 0.98861 | sorting nexin 5                                                                         | Snx5     |
| 1417649_at   | 0.89878 | cyclin-dependent kinase inhibitor 1C (P57)                                              | Cdkn1c   |
| 1417650_at   | 1.13075 | L-amino acid oxidase 1                                                                  | Lao1     |
| 1417651_at   | 1.06326 | "cytochrome P450, family 2, subfamily c, polypeptide 29"                                | Cyp2c29  |
| 1417652_a_at | 1.04051 | tubulin cofactor a                                                                      | Tbca     |
| 1417653_at   | 1.11626 | parvalbumin                                                                             | Pvalb    |
| 1417654_at   | 1.12873 | syndecan 4                                                                              | Sdc4     |
| 1417655_a_at | 1.01455 | arsenate resistance protein 2                                                           | Ars2     |
| 1417656_at   | 1.03065 | myeloblastosis oncogene-like 2                                                          | Mybl2    |
| 1417657_s_at | 1.17388 | "DnaJ (Hsp40) homolog, subfamily C, member 2"                                           | Dnajc2   |
| 1417658_at   | 1.08542 | transforming growth factor beta regulated gene 4                                        | Tbrg4    |
| 1417659_at   | 1.10299 | vacuolar protein sorting 29 (S. pombe)                                                  | Vps29    |
| 1417660_s_at | 1.06758 | vacuolar protein sorting 29 (S. pombe)                                                  | Vps29    |
| 1417661_at   | 0.82841 | RAD52 motif 1                                                                           | Rdm1     |
| 1417662_at   | 1.12238 | "ELK3, member of ETS oncogene family"                                                   | Elk3     |
| 1417663_a_at | 0.97037 | N-myc downstream regulated gene 3                                                       | Ndr3     |
| 1417664_a_at | 0.84364 | N-myc downstream regulated gene 3                                                       | Ndr3     |
| 1417665_a_at | 1.05733 | cleavage and polyadenylation specific factor 1                                          | Cpsf1    |
| 1417666_at   | 0.98669 | "deoxynucleotidyltransferase, terminal, interacting protein 1"                          | Dnttip1  |
| 1417667_a_at | 0.92387 | phosphotriesterase related                                                              | Pter     |
| 1417668_at   | 0.92631 | reticulon 4 interacting protein 1                                                       | Rtn4ip1  |
| 1417669_at   | 0.89064 | abhydrolase domain containing 12                                                        | Abhd12   |
| 1417670_at   | 0.97523 | translocase of inner mitochondrial membrane 44                                          | Timm44   |

1417671\_at 0.97005 selenocysteine lyase Scly  
1417672\_at 1.00315 "solute carrier family 4, sodium bicarbonate cotransporter-like, member 10" Slc4a10  
1417673\_at 0.65093 growth factor receptor bound protein 14 Grb14  
1417674\_s\_at 1.01981 "golgi autoantigen, golgin subfamily a, 4" Golga4  
1417675\_a\_at 1.40014 midasin homolog (yeast) Mdn1  
1417676\_a\_at 1.06986 "protein tyrosine phosphatase, receptor type, O" Ptpro  
1417677\_at 1.09161 opsin (encephalopsin) Opn3  
1417678\_at 0.76799 matrix metalloproteinase 24 Mmp24  
1417679\_at 1.07539 growth factor independent 1 Gfi1  
1417680\_at 1.03520 "potassium voltage-gated channel, shaker-related subfamily, member 5" Kcna5  
1417681\_at 0.99661 nudix (nucleoside diphosphate linked moiety X)-type motif 21 Nudt21  
1417682\_a\_at 0.96975 "protease, serine, 2" Prss2  
1417683\_at 0.86170 diablo homolog (Drosophila) Diablo  
1417684\_at 1.01514 THUMP domain containing 3 Thumpd3  
1417685\_at 0.97326 ankyrin repeat and FYVE domain containing 1 Ankfy1  
1417686\_at 1.00269 "lectin, galactose binding, soluble 12" Lgals12  
1417687\_at 0.80451 "lectin, galactose binding, soluble 12" Lgals12  
1417688\_at 0.81999 cDNA sequence BC004044 BC004044  
1417689\_a\_at 1.07287 PDZK1 interacting protein 1 Pdzk1ip1  
1417690\_at 0.87938 "protein kinase, AMP-activated, gamma 1 non-catalytic subunit" Prkag1  
1417691\_at 0.93656 bridging integrator 3 Bin3  
1417692\_at 0.98326 developmentally regulated GTP binding protein 2 Drg2  
1417693\_a\_at 0.79932 growth factor receptor bound protein 2-associated protein 1 Gab1  
1417694\_at 0.88669 growth factor receptor bound protein 2-associated protein 1 Gab1  
1417695\_a\_at 0.82375 sterol O-acyltransferase 1 Soat1  
1417696\_at 0.98772 sterol O-acyltransferase 1 Soat1  
1417697\_at 0.99673 sterol O-acyltransferase 1 Soat1  
1417698\_at 1.07730 "general transcription factor IIF, polypeptide 1" Gtf2f1  
1417699\_at 1.03269 "general transcription factor IIF, polypeptide 1" Gtf2f1  
1417700\_at 0.76080 "Rab38, member of RAS oncogene family" Rab38  
1417701\_at 0.78410 "protein phosphatase 1, regulatory (inhibitor) subunit 14c" Ppp1r14c  
1417702\_a\_at 0.87766 histamine N-methyltransferase Hnmt  
1417703\_at 0.99533 poliovirus receptor-related 2 Pvr12  
1417704\_a\_at 1.08964 Rho GTPase activating protein 6 Arhgap6  
1417705\_at 0.95493 "OTU domain, ubiquitin aldehyde binding 1" Otub1  
1417706\_at 0.83616 alpha-N-acetylglucosaminidase (Sanfilippo disease IIIB) Naglu  
1417707\_at 0.55964 RIKEN cDNA B230342M21 gene B230342M21Rik  
1417708\_at 0.96653 synaptotagmin III Syt3  
1417709\_at 0.86783 "cytochrome P450, family 46, subfamily a, polypeptide 1" Cyp46a1  
1417710\_at 0.98116 methyltransferase like 9 Mettl9  
1417711\_at 0.94645 RIKEN cDNA 0610012D09 gene 0610012D09Rik  
1417712\_at 1.12108 "eukaryotic translation initiation factor 2, subunit 2 (beta)" Eif2s2

1417713\_at 1.19986 "eukaryotic translation initiation factor 2, subunit 2 (beta)" Eif2s2  
1417714\_x\_at 0.94398 "hemoglobin alpha, adult chain 1" Hba-a1  
1417715\_a\_at 0.94088 "glutamate oxaloacetate transaminase 2, mitochondrial" Got2  
1417716\_at 0.95675 "glutamate oxaloacetate transaminase 2, mitochondrial" Got2  
1417717\_a\_at 1.10375 tyrosinase Tyr  
1417718\_at 1.10312 "eukaryotic translation initiation factor 3, subunit 4 (delta)" Eif3s4  
1417719\_at 1.21874 sin3 associated polypeptide Sap30  
1417720\_at 1.02665 polymerase (RNA) II (DNA directed) polypeptide J Polr2j  
1417721\_s\_at 0.89291 lysosomal-associated protein transmembrane 5 /// similar to Lysosomal-associated multitransmembrane protein (Retinoic acid-inducible E3 protein) Laptm5 /// LOC669058  
1417722\_at 1.03348 6-phosphogluconolactonase Pgl  
1417723\_at 1.06097 "ubiquitin-conjugating enzyme E2, J1" Ube2j1  
1417724\_at 1.06620 THO complex 4 Thoc4  
1417725\_a\_at 1.02749 Sjogren's syndrome/scleroderma autoantigen 1 homolog (human) Sssca1  
1417726\_at 1.15957 Sjogren's syndrome/scleroderma autoantigen 1 homolog (human) Sssca1  
1417727\_at 1.00849 "splicing factor, arginine/serine rich 9" Sfrs9  
1417728\_at 1.14975 methyl-CpG binding domain protein 3 Mbd3  
1417729\_at 0.98089 "myosin, heavy polypeptide 6, cardiac muscle, alpha" Myh6  
1417730\_at 0.84961 exostoses (multiple) 1 Ext1  
1417731\_at 1.05635 polyglutamine binding protein 1 Pqbp1  
1417732\_at 1.34093 annexin A8 Anxa8  
1417733\_at 0.95456 ring finger protein 146 Rnf146  
1417734\_at 0.85044 A kinase (PRKA) anchor protein 8-like Akap8l  
1417735\_at 0.91852 RIKEN cDNA 1810030J14 gene /// similar to Serum amyloid P-component precursor (SAP) 1810030J14Rik /// LOC630754  
1417736\_at 0.94866 structural maintenance of chromosomes 6 Smc6  
1417737\_at 0.96206 mitochondrial ribosomal protein S31 Mrps31  
1417738\_at 0.96465 "RAB25, member RAS oncogene family" Rab25  
1417739\_at 1.09416 "mediator of RNA polymerase II transcription, subunit 11 homolog (S. cerevisiae)" Med11  
1417740\_at 1.07120 cell division cycle 37 homolog (S. cerevisiae)-like 1 Cdc37l1  
1417741\_at 0.95478 liver glycogen phosphorylase Pygl  
1417742\_a\_at 0.99374 DNA methyltransferase 1-associated protein 1 Dmap1  
1417743\_at 1.03647 CDC-like kinase 2 Clk2  
1417744\_a\_at 1.00496 v-ral simian leukemia viral oncogene homolog B (ras related) Ralb  
1417745\_at 0.87841 "carboxypeptidase N, polypeptide 1" Cpn1  
1417746\_at 1.01785 complexin 1 Cplx1  
1417747\_at 0.82133 complexin 1 Cplx1  
1417748\_x\_at 1.05171 forkhead box M1 Foxm1  
1417749\_a\_at 1.01539 tight junction protein 1 Tjp1  
1417750\_a\_at 1.56601 "solute carrier family 25, member 37" Slc25a37  
1417751\_at 1.08913 serine/threonine kinase 10 Stk10  
1417752\_at 1.02886 "coronin, actin binding protein 1C" Coro1c

1417753\_at 0.86567 polycystic kidney disease 2 Pkd2  
1417754\_at 0.94708 "topoisomerase I binding, arginine/serine-rich" Topors  
1417755\_at 0.94079 "topoisomerase I binding, arginine/serine-rich" Topors  
1417756\_a\_at 0.87633 lymphocyte specific 1 Lsp1  
1417757\_at 1.02162 unc-13 homolog B (C. elegans) Unc13b  
1417758\_at 0.99455 integrin alpha 2b Itga2b  
1417759\_at 0.86907 pore forming protein-like Pfp1  
1417760\_at 0.99535 "nuclear receptor subfamily 0, group B, member 1" Nr0b1  
1417761\_at 1.01002 apolipoprotein A-IV Apoa4  
1417762\_a\_at 1.05889 ribosomal protein L8 Rpl8  
1417763\_at 1.03634 "signal sequence receptor, alpha /// similar to signal sequence receptor, alpha" Ssr1 /// LOC636537  
1417764\_at 0.99497 "signal sequence receptor, alpha /// similar to signal sequence receptor, alpha" Ssr1 /// LOC636537  
1417765\_a\_at 0.87354 "amylase 1, salivary" Amy1  
1417766\_at 1.17976 cytochrome b5 type B Cyb5b  
1417767\_at 1.21166 cytochrome b5 type B Cyb5b  
1417768\_at 0.93029 patatin-like phospholipase domain containing 8 Pnpla8  
1417769\_at 0.79068 --- ---  
1417770\_s\_at 0.92755 --- ---  
1417771\_a\_at 1.06847 "proteasome (prosome, macropain) 26S subunit, ATPase, 6" Psmc6  
1417772\_at 1.26842 glyoxylate reductase/hydroxypyruvate reductase Grhpr  
1417773\_at 1.02208 N-acetylneuraminic acid synthase (sialic acid synthase) Nans  
1417774\_at 0.99469 N-acetylneuraminic acid synthase (sialic acid synthase) Nans  
1417775\_at 1.15512 RNA polymerase 1-4 Rpo1-4  
1417776\_at 0.93792 "alpha-2-glycoprotein 1, zinc" Azgp1  
1417777\_at 0.84322 leukotriene B4 12-hydroxydehydrogenase Ltb4dh  
1417778\_at 0.94124 zinc finger protein 35 Zfp35  
1417779\_at 0.84058 RIKEN cDNA 2310079N02 gene 2310079N02Rik  
1417780\_at 0.85505 longevity assurance homolog 4 (S. cerevisiae) Lass4  
1417781\_at 1.10720 longevity assurance homolog 4 (S. cerevisiae) Lass4  
1417782\_at 1.02963 longevity assurance homolog 4 (S. cerevisiae) Lass4  
1417783\_at 1.01526 amyotrophic lateral sclerosis 2 (juvenile) homolog (human) Als2  
1417784\_at 0.95018 amyotrophic lateral sclerosis 2 (juvenile) homolog (human) Als2  
1417785\_at 1.36871 phospholipase A1 member A Pla1a  
1417786\_a\_at 1.03597 regulator of G-protein signaling 19 Rgs19  
1417787\_at 0.95262 dickkopf-like 1 Dkk1  
1417788\_at 1.06433 "synuclein, gamma" Sncg  
1417789\_at 1.07103 small chemokine (C-C motif) ligand 11 Ccl11  
1417790\_at 0.99414 docking protein 1 Dok1  
1417791\_a\_at 0.95669 "zinc finger, matrin-like" Zfml  
1417792\_at 0.94453 "zinc finger, matrin-like" Zfml  
1417793\_at 1.07889 interferon inducible GTPase 2 Iigp2

1417794\_at 0.85512 "zinc finger, MYM-type 3" Zmym3  
1417795\_at 0.94636 cell adhesion molecule with homology to L1CAM Chl1  
1417796\_at 0.94844 G protein pathway suppressor 2 Gps2  
1417797\_a\_at 0.97108 RIKEN cDNA 1810019J16 gene 1810019J16Rik  
1417798\_at 1.02111 RIKEN cDNA 1810019J16 gene 1810019J16Rik  
1417799\_at 0.94613 "ATPase, H+ transporting, lysosomal V1 subunit G2" Atp6v1g2  
1417800\_at 0.90499 "poly (ADP-ribose) polymerase family, member 2" Parp2  
1417801\_a\_at 0.97341 "protein tyrosine phosphatase, receptor-type, F interacting protein, binding protein 2" Ppfibp2  
1417802\_at 0.63353 RIKEN cDNA 1110032A04 gene 1110032A04Rik  
1417803\_at 0.71940 RIKEN cDNA 1110032A04 gene 1110032A04Rik  
1417804\_at 1.14406 "RAS, guanyl releasing protein 2" Rasgrp2  
1417805\_at 1.03471 "X-prolyl aminopeptidase (aminopeptidase P) 2, membrane-bound" Xpnpep2  
1417806\_at 0.95114 popeye domain containing 2 Popdc2  
1417807\_at 1.00640 RIKEN cDNA 2700038N03 gene 2700038N03Rik  
1417808\_at 1.05532 RIKEN cDNA 2310050C09 gene 2310050C09Rik  
1417809\_at 1.07685 "solute carrier family 22 (organic cation transporter), member 18" Slc22a18  
1417810\_a\_at 0.92313 "potassium voltage gated channel, Shab-related subfamily, member 1 /// protein kinase C and casein kinase substrate in neurons 2" Kcnb1 /// Pacsin2  
1417811\_at 1.11538 "solute carrier family 24 (sodium/potassium/calcium exchanger), member 6" Slc24a6  
1417812\_a\_at 2.84457 "laminin, beta 3" Lamb3  
1417813\_at 1.07976 inhibitor of kappaB kinase epsilon Ikbke  
1417814\_at 0.78960 "phospholipase A2, group V" Pla2g5  
1417815\_a\_at 0.82967 serine incorporator 3 Serinc3  
1417816\_s\_at 0.87731 serine incorporator 3 Serinc3  
1417817\_a\_at 0.91184 WW domain containing transcription regulator 1 Wwtr1  
1417818\_at 0.86433 WW domain containing transcription regulator 1 Wwtr1  
1417819\_at 0.94028 "torsin family 1, member B" Tor1b  
1417820\_at 1.02549 "torsin family 1, member B" Tor1b  
1417821\_at 1.27607 "DNA segment, Chr 17, human D6S56E 5" D17H6S56E-5  
1417822\_at 1.24939 "DNA segment, Chr 17, human D6S56E 5" D17H6S56E-5  
1417823\_at 1.33610 glycine C-acetyltransferase (2-amino-3-ketobutyrate-coenzyme A ligase) Gcat  
1417824\_at 1.00776 glycine C-acetyltransferase (2-amino-3-ketobutyrate-coenzyme A ligase) Gcat  
1417825\_at 1.12800 esterase D/formylglutathione hydrolase Esd  
1417826\_at 0.87806 "aldo-keto reductase family 1, member E1" Akr1e1  
1417827\_at 0.87923 N-glycanase 1 Ngly1  
1417828\_at 0.87747 aquaporin 8 Aqp8  
1417829\_a\_at 0.96052 "RAB15, member RAS oncogene family" Rab15  
1417830\_at 1.02682 structural maintenance of chromosomes 1A Smc1a  
1417831\_at 0.91836 structural maintenance of chromosomes 1A Smc1a  
1417832\_at 0.91850 structural maintenance of chromosomes 1A Smc1a  
1417833\_at 0.96430 zinc finger CCCH type containing 10 Zc3h10

1417834\_at 1.01169 synaptojanin 2 binding protein Synj2bp  
1417835\_at 0.88789 murinoglobulin 1 /// similar to murinoglobulin 1 Mug1 /// LOC669343  
1417836\_at 1.00095 glutathione peroxidase 7 Gpx7  
1417837\_at 0.94722 "pleckstrin homology-like domain, family A, member 2" Phlda2  
1417838\_at 1.05296 spermiogenesis specific transcript on the Y 2 /// similar to RIKEN cDNA  
1700029H17 /// similar to spermiogenesis specific transcript on the Y 2 /// similar to spermiogenesis  
specific transcript on the Y 2 /// similar to spermiogenesis specific transcript on the Y 2 /// similar to  
Spindlin-like protein 2 (SPIN-2) Ssty2 /// LOC382133 /// MGC107098 /// LOC434960 ///  
LOC435023 /// LOC666126  
1417839\_at 0.99714 claudin 5 Cldn5  
1417840\_at 0.88295 RIKEN cDNA 1500031L02 gene 1500031L02Rik  
1417841\_at 0.98512 peroxisomal membrane protein 2 Pxmp2  
1417842\_at 0.96192 calcium modulating ligand Caml  
1417843\_s\_at 0.91490 EPS8-like 2 Eps8l2  
1417844\_at 1.07040 "mediator of RNA polymerase II transcription, subunit 4 homolog (yeast)"  
Med4  
1417845\_at 1.11477 claudin 6 Cldn6  
1417846\_at 0.88480 Unc-51 like kinase 2 (C. elegans) Ulk2  
1417847\_at 0.75750 Unc-51 like kinase 2 (C. elegans) Ulk2  
1417848\_at 0.76773 zinc finger protein 704 Zfp704  
1417849\_at 0.83715 zinc finger protein 704 Zfp704  
1417850\_at 0.89033 retinoblastoma 1 Rb1  
1417851\_at 0.95343 chemokine (C-X-C motif) ligand 13 Cxcl13  
1417852\_x\_at 1.57536 chloride channel calcium activated 1 Clca1  
1417853\_at 1.19399 chloride channel calcium activated 1 Clca1  
1417854\_at 1.02090 mitogen activated protein kinase kinase 5 Map2k5  
1417855\_at 1.07605 F-box and leucine-rich repeat protein 15 Fbxl15  
1417856\_at 1.28754 avian reticuloendotheliosis viral (v-rel) oncogene related B Relb  
1417857\_at 0.86684 methylmalonic aciduria (cobalamin deficiency) type A Mmaa  
1417858\_at 1.21568 RAS protein activator like 1 (GAP1 like) Rasal1  
1417859\_at 1.16055 growth arrest specific 7 Gas7  
1417860\_a\_at 0.40565 "spondin 2, extracellular matrix protein" Spon2  
1417861\_at 0.99463 cyclin C Ccnc  
1417862\_at 0.95405 RIKEN cDNA A830059I20 gene A830059I20Rik  
1417863\_at 1.09326 spermatogenesis associated 19 Spata19  
1417864\_at 1.28497 phosphoglycerate kinase 1 /// phosphoglycerate kinase 1-like ///  
phosphoglycerate kinase 1-like Pgk1 /// LOC433594 /// LOC668435  
1417865\_at 1.00840 "tumor necrosis factor, alpha-induced protein 1 (endothelial)" Tnfaip1  
1417866\_at 1.10293 "tumor necrosis factor, alpha-induced protein 1 (endothelial)" Tnfaip1  
1417867\_at 1.13216 complement factor D (adipsin) Cfd  
1417868\_a\_at 0.95475 cathepsin Z Ctsz  
1417869\_s\_at 1.02929 cathepsin Z Ctsz  
1417870\_x\_at 1.03158 cathepsin Z Ctsz

1417871\_at 1.35922 hydroxysteroid (17-beta) dehydrogenase 7 Hsd17b7  
1417872\_at 0.62267 four and a half LIM domains 1 Fhl1  
1417873\_at 1.01973 PWP1 homolog (S. cerevisiae) Pwp1  
1417874\_at 0.96069 "TMEM9 domain family, member B" Tmem9b  
1417875\_at 0.98488 DEAD (Asp-Glu-Ala-Asp) box polypeptide 50 Ddx50  
1417876\_at 0.89900 "Fc receptor, IgG, high affinity I" Fcgr1  
1417877\_at 0.69834 RIKEN cDNA 2310005P05 gene 2310005P05Rik  
1417878\_at 1.01801 E2F transcription factor 1 E2f1  
1417879\_at 1.03350 neuron derived neurotrophic factor Nenf  
1417880\_at 1.03680 "glucose-6-phosphatase, catalytic" G6pc  
1417881\_at 0.77602 "solute carrier family 39 (zinc transporter), member 3" Slc39a3  
1417882\_at 1.01731 "solute carrier family 39 (zinc transporter), member 3" Slc39a3  
1417883\_at 0.97136 "glutathione S-transferase, theta 2" Gstt2  
1417884\_at 0.79989 "solute carrier family 16 (monocarboxylic acid transporters), member 6" Slc16a6  
1417885\_at 0.96175 microtubule-associated protein tau Mapt  
1417886\_at 1.12470 RIKEN cDNA 1810009A15 gene 1810009A15Rik  
1417887\_at 0.98708 integrator complex subunit 5 Ints5  
1417888\_at 0.85598 tripartite motif protein 13 Trim13  
1417889\_at 1.02252 apolipoprotein B editing complex 2 Apobec2  
1417890\_at 1.21027 "pyridoxal (pyridoxine, vitamin B6) phosphatase" Pdxp  
1417891\_at 0.90407 splA/ryanodine receptor domain and SOCS box containing 3 Spsb3  
1417892\_a\_at 0.92210 "sirtuin 3 (silent mating type information regulation 2, homolog) 3 (S. cerevisiae)" Sirt3  
1417893\_at 0.99118 sideroflexin 3 Sfxn3  
1417894\_at 0.88743 G protein-coupled receptor 97 Gpr97  
1417895\_a\_at 1.07257 transmembrane protein 54 Tmem54  
1417896\_at 1.09135 tight junction protein 3 Tjp3  
1417897\_at 1.02274 breast cancer metastasis-suppressor 1 Brms1  
1417898\_a\_at 0.98415 granzyme A Gzma  
1417899\_at 0.88862 zona pellucida 3 receptor Zp3r  
1417900\_a\_at 1.02711 very low density lipoprotein receptor Vldlr  
1417901\_a\_at 0.97836 islet cell autoantigen 1 Ica1  
1417902\_at 1.37062 "solute carrier family 19 (thiamine transporter), member 2" Slc19a2  
1417903\_at 1.02101 "deafness, autosomal dominant 5 homolog (human)" Dfna5h  
1417904\_at 1.00548 "DNA cross-link repair 1A, PSO2 homolog (S. cerevisiae)" Dclre1a  
1417905\_at 1.04788 prolactin-like protein F Prlpf  
1417906\_at 0.98655 RIKEN cDNA 1700001F09 gene 1700001F09Rik  
1417907\_at 0.94764 ubiquitin-conjugating enzyme E2L 3 /// ribosomal protein S28 Ube213 /// Rps28  
1417908\_s\_at 0.98703 ubiquitin-conjugating enzyme E2L 3 /// ribosomal protein S28 Ube213 /// Rps28  
1417909\_at 1.03349 "serine (or cysteine) peptidase inhibitor, clade C (antithrombin), member 1" Serpincl1

|              |                                                                                          |               |        |
|--------------|------------------------------------------------------------------------------------------|---------------|--------|
| 1417910_at   | 0.99070 cyclin A2                                                                        | Ccna2         |        |
| 1417911_at   | 1.01006 cyclin A2                                                                        | Ccna2         |        |
| 1417912_at   | 1.04663 transmembrane protein 93                                                         | Tmem93        |        |
| 1417913_at   | 1.02832 GINS complex subunit 4 (Sld5 homolog)                                            | Gins4         |        |
| 1417914_at   | 1.09867 "RAP2B, member of RAS oncogene family"                                           | Rap2b         |        |
| 1417915_at   | 1.12389 "RAP2B, member of RAS oncogene family"                                           | Rap2b         |        |
| 1417916_a_at | 1.06135 fractured callus expressed transcript 1                                          | Fxc1          |        |
| 1417917_at   | 0.79353 calponin 1                                                                       | Cnn1          |        |
| 1417918_at   | 1.05530 mitochondrial ribosomal protein L11                                              | Mrpl11        |        |
| 1417919_at   | 1.09856 "protein phosphatase 1, regulatory (inhibitor) subunit 7"                        |               | Ppp1r7 |
| 1417920_at   | 1.09737 amnionless                                                                       | Amn           |        |
| 1417921_at   | 1.11137 RIKEN cDNA 2610029G23 gene                                                       | 2610029G23Rik |        |
| 1417922_at   | 0.94526 kelch repeat and BTB (POZ) domain containing 4                                   | Kbtbd4        |        |
| 1417923_at   | 0.95076 p21 (CDKN1A)-activated kinase 3                                                  | Pak3          |        |
| 1417924_at   | 1.04005 p21 (CDKN1A)-activated kinase 3                                                  | Pak3          |        |
| 1417925_at   | 0.95256 chemokine (C-C motif) ligand 22                                                  | Ccl22         |        |
| 1417926_at   | 0.96624 leucine zipper protein 5                                                         | Luzp5         |        |
| 1417927_at   | 0.98815 DEAD (Asp-Glu-Ala-Asp) box polypeptide 19a                                       |               | Ddx19a |
| 1417928_at   | 0.86884 PDZ and LIM domain 4                                                             | Pdlim4        |        |
| 1417929_at   | 0.96560 "solute carrier family 7 (cationic amino acid transporter, y+ system), member 8" |               | Slc7a8 |
| 1417930_at   | 0.98625 Ngfi-A binding protein 2                                                         | Nab2          |        |
| 1417931_at   | 0.90337 N-deacetylase/N-sulfotransferase (heparan glucosaminyl) 2                        |               | Ndst2  |
| 1417932_at   | 1.17634 interleukin 18                                                                   | Il18          |        |
| 1417933_at   | 0.82741 insulin-like growth factor binding protein 6                                     | Igfbp6        |        |
| 1417934_at   | 0.98286 "DnaJ (Hsp40) homolog, subfamily C, member 4"                                    | Dnajc4        |        |
| 1417935_at   | 0.85409 "makorin, ring finger protein, 2"                                                | Mkrn2         |        |
| 1417936_at   | 1.06849 chemokine (C-C motif) ligand 9                                                   | Ccl9          |        |
| 1417937_at   | 1.05583 "dapper homolog 1, antagonist of beta-catenin (xenopus)"                         |               | Dact1  |
| 1417938_at   | 0.94311 RAD51 associated protein 1                                                       | Rad51ap1      |        |
| 1417939_at   | 1.07755 RAD51 associated protein 1                                                       | Rad51ap1      |        |
| 1417940_s_at | 1.06734 RAD51 associated protein 1                                                       | Rad51ap1      |        |
| 1417941_at   | 0.94186 N-acetylneuraminic acid phosphatase                                              | Nanp          |        |
| 1417942_at   | 1.12077 Ly6/Plaur domain containing 3                                                    | Lypd3         |        |
| 1417943_at   | 0.96017 "guanine nucleotide binding protein (G protein), gamma 4 subunit"                |               | Gng4   |
| 1417944_at   | 1.00339 "guanine nucleotide binding protein (G protein), gamma 4 subunit"                |               | Gng4   |
| 1417945_at   | 1.00058 "POU domain, class 5, transcription factor 1"                                    | Pou5f1        |        |
| 1417946_at   | 0.88625 abhydrolase domain containing 3                                                  | Abhd3         |        |
| 1417947_at   | 1.00464 proliferating cell nuclear antigen                                               | Pcna          |        |
| 1417948_s_at | 0.87972 interleukin enhancer binding factor 2                                            | Ilf2          |        |
| 1417949_at   | 0.96070 interleukin enhancer binding factor 2                                            | Ilf2          |        |
| 1417950_a_at | 0.91159 apolipoprotein A-II                                                              | Apoa2         |        |
| 1417951_at   | 0.96820 "enolase 3, beta muscle"                                                         | Eno3          |        |



1417952\_at 1.04168 "cytochrome P450, family 2, subfamily j, polypeptide 6" Cyp2j6  
 1417953\_at 0.73023 "DNA segment, Chr 6, Wayne State University 176, expressed" D6Wsu176e  
 1417954\_at 0.94865 somatostatin Sst  
 1417955\_at 0.90201 coiled-coil domain containing 71 Ccdc71  
 1417956\_at 0.93385 "cell death-inducing DNA fragmentation factor, alpha subunit-like effector A"  
 Cidea  
 1417957\_a\_at 1.07471 tetraspanin 1 Tspan1  
 1417958\_at 0.86494 tetraspanin 1 Tspan1  
 1417959\_at 0.79904 PDZ and LIM domain 7 Pdlim7  
 1417960\_at 1.18421 cytoplasmic polyadenylation element binding protein 1 Cpeb1  
 1417961\_a\_at 1.00885 tripartite motif protein 30 Trim30  
 1417962\_s\_at 0.53859 growth hormone receptor Ghr  
 1417963\_at 0.87487 phospholipid transfer protein Pltp  
 1417964\_at 1.05054 "adaptor-related protein complex 3, delta 1 subunit" Ap3d1  
 1417965\_at 0.90664 "pleckstrin homology domain containing, family A (phosphoinositide binding  
 specific) member 1" Plekha1  
 1417966\_at 1.03766 mitochondrial ribosomal protein L39 Mrpl39  
 1417967\_at 1.07562 MMS19 (MET18 *S. cerevisiae*)-like Mms19l  
 1417968\_a\_at 0.90452 methyl-CpG binding domain protein 1 Mbd1  
 1417969\_at 0.88317 F-box only protein 31 Fbxo31  
 1417970\_at 0.94513 "ATP synthase, H<sup>+</sup> transporting, mitochondrial F0 complex, subunit s" Atp5s  
 1417971\_at 0.83518 nurim (nuclear envelope membrane protein) Nrm  
 1417972\_s\_at 0.97548 "processing of precursor 5, ribonuclease P/MRP family (*S. cerevisiae*)" Pop5  
 1417973\_at 1.17955 "inter-alpha trypsin inhibitor, heavy chain 1" Itih1  
 1417974\_at 1.00425 karyopherin (importin) alpha 4 Kpna4  
 1417975\_at 1.03056 karyopherin (importin) alpha 4 Kpna4  
 1417976\_at 0.99701 adenosine deaminase Ada  
 1417977\_at 0.60174 eukaryotic translation initiation factor 4E member 3 Eif4e3  
 1417978\_at 0.73109 eukaryotic translation initiation factor 4E member 3 Eif4e3  
 1417979\_at 0.88067 tenomodulin Tnmd  
 1417980\_a\_at 1.09204 insulin induced gene 2 Insig2  
 1417981\_at 1.10784 insulin induced gene 2 Insig2  
 1417982\_at 1.06362 insulin induced gene 2 Insig2  
 1417983\_a\_at 1.08230 ubiquitin-conjugating enzyme E2 variant 2 Ube2v2  
 1417984\_at 0.95546 ubiquitin-conjugating enzyme E2 variant 2 Ube2v2  
 1417985\_at 0.98495 Notch-regulated ankyrin repeat protein Nrarp  
 1417986\_at 0.94155 Notch-regulated ankyrin repeat protein Nrarp  
 1417987\_at 0.93951 biotinidase Btd  
 1417988\_at 0.82019 regulated endocrine-specific protein 18 Resp18  
 1417989\_at 1.07781 testis-specific serine kinase 1 Tssk1  
 1417990\_at 1.03221 "protein phosphatase 1, regulatory (inhibitor) subunit 14D" Ppp1r14d  
 1417991\_at 0.91852 "deiodinase, iodothyronine, type I" Dio1  
 1417992\_a\_at 1.01249 seminal vesicle secretion 3 /// RIKEN cDNA 9530004A22 Svs3 ///

## 9530004A22Rik

1417993\_at 1.04123 seminal vesicle secretion 3 Svs3  
 1417994\_a\_at 0.97698 "amiloride-sensitive cation channel 1, neuronal (degenerin)" Accn1  
 1417995\_at 0.99895 "protein tyrosine phosphatase, non-receptor type 22 (lymphoid)" Ptpn22  
 1417996\_at 0.96047 neuroglobin Ngb  
 1417997\_at 0.96113 neuroglobin Ngb  
 1417998\_at 0.99327 prostaglandin E synthase 3 (cytosolic) Ptges3  
 1417999\_at 0.85101 integral membrane protein 2B Itm2b  
 1418000\_a\_at 0.92444 integral membrane protein 2B Itm2b  
 1418001\_at 0.95150 integral membrane protein 2B Itm2b  
 1418002\_at 0.95535 "HIG1 domain family, member 2A" Higd2a  
 1418003\_at 0.92455 RIKEN cDNA 1190002H23 gene 1190002H23Rik  
 1418004\_a\_at 1.16945 RIKEN cDNA 1810009M01 gene 1810009M01Rik  
 1418005\_at 0.92616 "succinate dehydrogenase complex, subunit B, iron sulfur (Ip)" Sdhb  
 1418006\_at 1.08561 RIKEN cDNA 5830416A07 gene 5830416A07Rik  
 1418007\_at 0.99837 RIKEN cDNA 1810007M14 gene 1810007M14Rik  
 1418008\_at 1.17711 RIKEN cDNA 1810007M14 gene 1810007M14Rik  
 1418009\_at 0.96661 RIKEN cDNA 1810007M14 gene 1810007M14Rik  
 1418010\_a\_at 1.10224 SH3-domain GRB2-like B1 (endophilin) Sh3glb1  
 1418011\_a\_at 0.98900 SH3-domain GRB2-like B1 (endophilin) Sh3glb1  
 1418012\_at 0.89263 SH3-domain GRB2-like B1 (endophilin) Sh3glb1  
 1418013\_at 0.95409 camello-like 1 Cml1  
 1418014\_a\_at 0.95815 "UDP-Gal:betaGlcNAc beta 1,4- galactosyltransferase, polypeptide 1"  
 B4galt1  
 1418015\_at 1.03963 pumilio 2 (Drosophila) Pum2  
 1418016\_at 1.02600 pumilio 2 (Drosophila) Pum2  
 1418017\_at 0.94078 pumilio 2 (Drosophila) Pum2  
 1418018\_at 0.98809 carboxypeptidase D Cpd  
 1418019\_at 0.90784 carboxypeptidase D Cpd  
 1418020\_s\_at 0.92703 carboxypeptidase D Cpd  
 1418021\_at 0.78389 complement component 4B (Childo blood group) /// similar to Complement C4  
 precursor C4b /// LOC675521  
 1418022\_at 1.16188 NMDA receptor-regulated gene 1 Narg1  
 1418023\_at 1.22904 NMDA receptor-regulated gene 1 Narg1  
 1418024\_at 1.17614 NMDA receptor-regulated gene 1 Narg1  
 1418025\_at 1.40296 "basic helix-loop-helix domain containing, class B2" Bhlhb2  
 1418026\_at 1.06307 exonuclease 1 Exo1  
 1418027\_at 1.04014 exonuclease 1 Exo1  
 1418028\_at 0.95253 dopachrome tautomerase Dct  
 1418029\_at 1.14920 Fas apoptotic inhibitory molecule Faim  
 1418030\_at 1.02086 "solute carrier organic anion transporter family, member 3a1" Slco3a1  
 1418031\_at 0.90709 myosin IXb Myo9b  
 1418032\_at 0.97819 integrin alpha FG-GAP repeat containing 2 Itfg2

1418033\_s\_at 0.96753 zinc finger protein 535 Zfp535  
1418034\_at 1.09175 mitochondrial ribosomal protein S9 Mrps9  
1418035\_a\_at 0.91551 "DNA primase, p58 subunit" Prim2  
1418036\_at 0.96506 "DNA primase, p58 subunit" Prim2  
1418037\_at 0.61867 complement component 4 binding protein C4bp  
1418038\_s\_at 1.13734 dual specificity phosphatase 19 Dusp19  
1418039\_at 0.91151 "RAB, member of RAS oncogene family-like 3" Rabl3  
1418040\_at 0.94935 RIKEN cDNA 4432406C05 gene 4432406C05Rik  
1418041\_at 0.97044 RIKEN cDNA 4432406C05 gene 4432406C05Rik  
1418042\_a\_at 1.07270 "ATP-binding cassette, sub-family C (CFTR/MRP), member 5" Abcc5  
1418043\_at 0.96876 "ATP-binding cassette, sub-family C (CFTR/MRP), member 5" Abcc5  
1418044\_at 1.07786 RIKEN cDNA A630042L21 gene A630042L21Rik  
1418045\_at 1.00570 inositol polyphosphate-1-phosphatase Inpp1  
1418046\_at 0.90269 nucleosome assembly protein 1-like 2 Nap1l2  
1418047\_at 0.99155 neurogenic differentiation 6 Neurod6  
1418048\_at 0.99994 RIKEN cDNA 1110059G10 gene 1110059G10Rik  
1418049\_at 0.74271 latent transforming growth factor beta binding protein 3 Ltbp3  
1418050\_at 1.00046 glycosylphosphatidylinositol specific phospholipase D1 Gpld1  
1418051\_at 1.07052 Eph receptor B6 Ephb6  
1418052\_at 1.23049 mevalonate kinase Mvk  
1418053\_at 0.92221 "synuclein, beta" Sncb  
1418054\_at 0.96857 neurogenic differentiation 4 Neurod4  
1418055\_at 0.93873 neurogenic differentiation 4 Neurod4  
1418056\_at 0.88691 IQ motif containing F3 Iqcf3  
1418057\_at 0.98356 T-cell lymphoma invasion and metastasis 1 Tiam1  
1418058\_at 1.09774 "EGF, latrophilin seven transmembrane domain containing 1" Eltd1  
1418059\_at 1.12943 "EGF, latrophilin seven transmembrane domain containing 1" Eltd1  
1418060\_a\_at 1.01179 mitogen activated protein kinase 7 Mapk7  
1418061\_at 0.99764 latent transforming growth factor beta binding protein 2 Ltbp2  
1418062\_at 1.02918 eukaryotic translation elongation factor 1 alpha 2 Eef1a2  
1418063\_at 1.11111 keratocan Kera  
1418064\_at 1.00745 TCF3 (E2A) fusion partner Tfpt  
1418065\_at 0.98598 recombination activating gene 2 Rag2  
1418066\_at 1.02413 "cofilin 2, muscle" Cfl2  
1418067\_at 0.96735 "cofilin 2, muscle" Cfl2  
1418068\_at 0.93466 NADH dehydrogenase (ubiquinone) 1 alpha subcomplex 10 Ndufa10  
1418069\_at 1.01659 apolipoprotein C-II Apoc2  
1418070\_at 0.79735 "chromodomain protein, Y chromosome-like" Cdyl  
1418071\_s\_at 0.96785 "chromodomain protein, Y chromosome-like" Cdyl  
1418072\_at 0.85060 "histone 1, H2bc" Hist1h2bc  
1418073\_at 1.15689 acyl-CoA thioesterase 9 Acot9  
1418074\_at 0.85209 "ST6 (alpha-N-acetyl-neuraminyl-2,3-beta-galactosyl-1,3)-N-acetylgalactosaminide alpha-2,6-sialyltransferase 4" St6galnac4

1418075\_at 0.87154 "ST6 (alpha-N-acetyl-neuraminyl-2,3-beta-galactosyl-1,3)-N-acetylgalactosaminide alpha-2,6-sialyltransferase 4" St6galnac4  
 1418076\_at 1.00795 suppression of tumorigenicity 14 (colon carcinoma) St14  
 1418077\_at 0.97398 tripartite motif protein 21 Trim21  
 1418078\_at 1.00083 "proteasome (prosome, macropain) 28 subunit, 3" Psme3  
 1418079\_at 1.07329 "proteasome (prosome, macropain) 28 subunit, 3" Psme3  
 1418080\_at 0.95462 "UDP-Gal:betaGlcNAc beta 1,4- galactosyltransferase, polypeptide 2" B4galt2  
 1418081\_at 0.98768 Williams-Beuren syndrome chromosome region 18 homolog (human) Wbscr18  
 1418082\_at 1.05083 N-myristoyltransferase 1 Nmt1  
 1418083\_at 0.97923 RIKEN cDNA 0610009B22 gene 0610009B22Rik  
 1418084\_at 0.53265 neuropilin 1 Nrp1  
 1418085\_at 0.83192 "protein kinase C, zeta" Prkcz  
 1418086\_at 1.11804 "protein phosphatase 1, regulatory (inhibitor) subunit 14A" Ppp1r14a  
 1418087\_at 0.98440 ubiquitin fusion degradation 1 like Ufd1l  
 1418088\_a\_at 1.03883 syntaxin 8 Stx8  
 1418089\_at 0.99884 syntaxin 8 Stx8  
 1418090\_at 0.89722 plasmalemma vesicle associated protein Plvap  
 1418091\_at 1.05527 transcription factor CP2-like 1 Tcfcp2l1  
 1418092\_s\_at 0.98423 thyroid hormone receptor interactor 10 Trip10  
 1418093\_a\_at 0.93632 epidermal growth factor Egf  
 1418094\_s\_at 1.05338 carbonic anhydrase 4 Car4  
 1418095\_at 1.03407 "small muscle protein, X-linked" Smpx  
 1418096\_at 0.99878 docking protein 3 Dok3  
 1418097\_a\_at 0.86173 transmembrane phosphoinositide 3-phosphatase and tensin homolog 2 Tpte2  
 1418098\_at 1.04089 adenylate cyclase 4 Adcy4  
 1418099\_at 1.35003 "tumor necrosis factor receptor superfamily, member 1b" Tnfrsf1b  
 1418100\_at 0.77640 RIKEN cDNA A030009H04 gene A030009H04Rik  
 1418101\_a\_at 0.86977 reticulon 3 Rtn3  
 1418102\_at 0.61345 hairy and enhancer of split 1 (Drosophila) Hes1  
 1418103\_at 0.89938 "solute carrier family 12 (potassium/chloride transporters), member 9" Slc12a9  
 1418104\_at 0.93698 nuclear receptor interacting protein 3 Nrip3  
 1418105\_at 0.81646 stathmin-like 4 Stmn4  
 1418106\_at 1.02971 hairy/enhancer-of-split related with YRPW motif 2 Hey2  
 1418107\_at 1.08740 "transcription elongation factor A (SII), 2" Tcea2  
 1418108\_at 0.89929 "pleckstrin homology domain containing, family K member 1" Plekhk1  
 1418109\_at 1.06519 G1 to S phase transition 2 Gspt2  
 1418110\_a\_at 0.97610 inositol polyphosphate-5-phosphatase D Inpp5d  
 1418111\_at 0.91070 RIKEN cDNA 1810008K16 gene 1810008K16Rik  
 1418112\_at 0.97988 mitochondrial ribosomal protein L10 Mrpl10  
 1418113\_at 0.91507 "cytochrome P450, family 2, subfamily d, polypeptide 10" Cyp2d10  
 1418114\_at 0.98325 recombining binding protein suppressor of hairless (Drosophila) Rbpsuh

1418115\_s\_at 1.02529 interferon alpha responsive gene Ifrg15  
1418116\_at 1.06647 interferon alpha responsive gene Ifrg15  
1418117\_at 0.77753 NADH dehydrogenase (ubiquinone) Fe-S protein 4 Ndufs4  
1418118\_at 0.87742 "solute carrier family 22 (organic cation transporter), member 1" Slc22a1  
1418119\_at 1.14761 RNA binding motif protein 8a Rbm8a  
1418120\_at 0.95470 RNA binding motif protein 8a Rbm8a  
1418121\_at 0.96169 vaccinia related kinase 3 Vrk3  
1418122\_at 0.96547 "myosin, heavy polypeptide 11, smooth muscle" Myh11  
1418123\_at 0.98364 unc-119 homolog (C. elegans) Unc119  
1418124\_at 1.05534 transmembrane protein 85 Tmem85  
1418125\_at 0.89590 INO80 complex homolog 1 (S. cerevisiae) Inoc1  
1418126\_at 1.51512 chemokine (C-C motif) ligand 5 Ccl5  
1418127\_a\_at 0.99988 programmed cell death 8 Pcdcd8  
1418128\_at 1.06002 adenylate cyclase 6 Adcy6  
1418129\_at 1.25496 24-dehydrocholesterol reductase Dhcr24  
1418130\_at 1.00916 --- ---  
1418131\_at 1.11840 "SAM domain and HD domain, 1" Samhd1  
1418132\_a\_at 0.98321 "DNA segment, Chr 7, Wayne State University 128, expressed" D7Wsu128e  
1418133\_at 1.23037 B-cell leukemia/lymphoma 3 Bcl3  
1418134\_at 0.96384 RIKEN cDNA 1200007B05 gene 1200007B05Rik  
1418135\_at 0.91487 "AF4/FMR2 family, member 1" Aff1  
1418136\_at 0.75019 transforming growth factor beta 1 induced transcript 1 Tgfb1i1  
1418137\_at 1.02001 mitochondrial ribosomal protein 63 Mrp63  
1418138\_at 1.07777 "sulfotransferase family 1D, member 1" Sult1d1  
1418139\_at 0.86034 doublecortin Dcx  
1418140\_at 0.94991 doublecortin Dcx  
1418141\_at 0.87884 doublecortin Dcx  
1418142\_at 0.88936 "potassium inwardly-rectifying channel, subfamily J, member 8" Kcnj8  
1418143\_at 0.94967 vacuolar protein sorting 45 (yeast) Vps45  
1418144\_a\_at 1.09624 "phosphatidylinositol-4-phosphate 5-kinase, type 1 beta" Pip5k1b  
1418145\_at 0.95571 tuftelin interacting protein 11 Tfip11  
1418146\_a\_at 0.93790 retinoblastoma-like 2 /// similar to retinoblastoma-like 2 Rbl2 ///  
LOC635075  
1418147\_at 0.92121 "transcription factor AP-2, gamma" Tcfap2c  
1418148\_at 1.12614 abhydrolase domain containing 1 Abhd1  
1418149\_at 1.12299 chromogranin A Chga  
1418150\_at 0.84602 myotubularin related protein 4 Mtmr4  
1418151\_at 0.94960 myotubularin related protein 4 Mtmr4  
1418152\_at 1.05585 nucleosome binding protein 1 Nsbp1  
1418153\_at 1.10541 "laminin, alpha 1" Lama1  
1418154\_at 1.11484 cDNA sequence BC004022 BC004022  
1418155\_at 0.95911 myotilin Myot  
1418156\_at 0.99436 "potassium voltage-gated channel, Isk-related subfamily, gene 4" Kcne4

|              |         |                                                                                     |               |
|--------------|---------|-------------------------------------------------------------------------------------|---------------|
| 1418157_at   | 0.90146 | "nuclear receptor subfamily 2, group F, member 1"                                   | Nr2f1         |
| 1418158_at   | 0.91391 | transformation related protein 63                                                   | Trp63         |
| 1418159_at   | 0.91102 | transcription factor CP2                                                            | Tcfcp2        |
| 1418160_at   | 0.98316 | "makorin, ring finger protein, 3"                                                   | Mkrm3         |
| 1418161_at   | 0.90665 | junctophilin 3                                                                      | Jph3          |
| 1418162_at   | 1.16751 | toll-like receptor 4                                                                | Tlr4          |
| 1418163_at   | 0.98418 | toll-like receptor 4                                                                | Tlr4          |
| 1418164_at   | 0.85931 | syntaxin 2                                                                          | Stx2          |
| 1418165_at   | 0.90554 | intelectin a                                                                        | Itlna         |
| 1418166_at   | 1.05565 | "interleukin 12 receptor, beta 1"                                                   | Il12rb1       |
| 1418167_at   | 1.06235 | transcription factor AP4                                                            | Tcfap4        |
| 1418168_at   | 1.01998 | "zinc finger, CCHC domain containing 14"                                            | Zcchc14       |
| 1418169_at   | 0.98442 | "zinc finger, CCHC domain containing 14"                                            | Zcchc14       |
| 1418170_a_at | 0.98968 | "zinc finger, CCHC domain containing 14"                                            | Zcchc14       |
| 1418171_at   | 0.86657 | transcription elongation factor A (SII)-like 8                                      | Tceal8        |
| 1418172_at   | 0.93908 | heme binding protein 1                                                              | Hebp1         |
| 1418173_at   | 1.02251 | keratin 25                                                                          | Krt25         |
| 1418174_at   | 0.77592 | D site albumin promoter binding protein                                             | Dbp           |
| 1418175_at   | 0.86176 | vitamin D receptor                                                                  | Vdr           |
| 1418176_at   | 0.91094 | vitamin D receptor                                                                  | Vdr           |
| 1418177_at   | 1.06887 | "gamma-aminobutyric acid (GABA-A) receptor, subunit gamma 2"                        | Gabrg2        |
| 1418178_at   | 0.88153 | "internexin neuronal intermediate filament protein, alpha"                          | Ina           |
| 1418179_at   | 0.84074 | autophagy-related 3 (yeast)                                                         | Atg3          |
| 1418180_at   | 0.92965 | trans-acting transcription factor 1                                                 | Sp1           |
| 1418181_at   | 0.65415 | protein tyrosine phosphatase 4a3                                                    | Ptp4a3        |
| 1418182_at   | 0.88831 | protein tyrosine phosphatase 4a3                                                    | Ptp4a3        |
| 1418183_a_at | 0.87633 | "pleckstrin homology, Sec7 and coiled-coil domains 1"                               | Pscd1         |
| 1418184_at   | 1.06037 | centromere protein M                                                                | Cenpm         |
| 1418185_at   | 1.02630 | RIKEN cDNA 4733401H18 gene                                                          | 4733401H18Rik |
| 1418186_at   | 0.87018 | "glutathione S-transferase, theta 1"                                                | Gstt1         |
| 1418187_at   | 1.17684 | receptor (calcitonin) activity modifying protein 2                                  | Ramp2         |
| 1418188_a_at | 1.81155 | Metastasis associated lung adenocarcinoma transcript 1 (non-coding RNA)             | Malat1        |
| 1418189_s_at | 1.86723 | Metastasis associated lung adenocarcinoma transcript 1 (non-coding RNA)             | Malat1        |
| 1418190_at   | 1.08157 | paraoxonase 1                                                                       | Pon1          |
| 1418191_at   | 0.99325 | ubiquitin specific peptidase 18                                                     | Usp18         |
| 1418192_at   | 1.05475 | max binding protein                                                                 | Mnt           |
| 1418193_at   | 0.97499 | similar to max binding protein                                                      | LOC672705     |
| 1418194_at   | 0.93270 | UDP-N-acetyl-alpha-D-galactosamine:polypeptide N-acetylgalactosaminyltransferase 10 | Galnt10       |
| 1418195_at   | 0.85001 | UDP-N-acetyl-alpha-D-galactosamine:polypeptide N-acetylgalactosaminyltransferase 10 | Galnt10       |

1418196\_at 1.10093 telomerase associated protein 1 Tep1  
1418197\_at 0.98517 "uncoupling protein 1 (mitochondrial, proton carrier)" Ucp1  
1418198\_a\_at 0.87048 transmembrane 9 superfamily member 1 Tm9sf1  
1418199\_at 1.05126 hemogen Hemgn  
1418200\_at 0.96979 GLI-Kruppel family member HKR3 Hkr3  
1418201\_at 1.00873 "pleckstrin homology domain containing, family G (with RhoGef domain) member 2" Plekhg2  
1418202\_a\_at 1.03920 widely-interspaced zinc finger motifs Wiz  
1418203\_at 1.21457 phorbol-12-myristate-13-acetate-induced protein 1 Pmaip1  
1418204\_s\_at 1.22016 allograft inflammatory factor 1 Aif1  
1418205\_at 0.77050 --- ---  
1418206\_at 0.96384 stromal cell-derived factor 2-like 1 Sdf2l1  
1418207\_at 0.97560 FXYD domain-containing ion transport regulator 4 Fxyd4  
1418208\_at 1.08617 paired box gene 8 Pax8  
1418209\_a\_at 0.72224 profilin 2 Pfn2  
1418210\_at 0.74180 profilin 2 Pfn2  
1418211\_at 0.90887 pink-eyed dilution p  
1418212\_at 0.99814 oligodendrocyte myelin glycoprotein Omg  
1418213\_at 0.98975 keratin 23 Krt23  
1418214\_at 0.91987 kinesin light chain 2 Klc2  
1418215\_at 1.00295 meprin 1 beta Mep1b  
1418216\_at 0.99592 gamma-glutamyltransferase-like activity 1 Ggta1  
1418217\_at 0.92420 "non-metastatic cells 7, protein expressed in" Nme7  
1418218\_at 1.03025 CEA-related cell adhesion molecule 9 Ceacam9  
1418219\_at 0.81493 interleukin 15 Il15  
1418220\_at 0.81340 forkhead box F2 Foxf2  
1418221\_at 0.99883 casein alpha s2-like B Csn1s2b  
1418222\_at 1.14041 RIKEN cDNA 2610024G14 gene 2610024G14Rik  
1418223\_at 1.02653 Sec11-like 1 (S. cerevisiae) Sec11l1  
1418224\_at 0.98960 Sec11-like 1 (S. cerevisiae) Sec11l1  
1418225\_at 1.08148 "origin recognition complex, subunit 2-like (S. cerevisiae)" Orc2l  
1418226\_at 1.05266 "origin recognition complex, subunit 2-like (S. cerevisiae)" Orc2l  
1418227\_at 1.10050 "origin recognition complex, subunit 2-like (S. cerevisiae)" Orc2l  
1418228\_at 1.01806 histone cell cycle regulation defective interacting protein 5 Hirip5  
1418229\_s\_at 1.05930 histone cell cycle regulation defective interacting protein 5 Hirip5  
1418230\_a\_at 1.01058 LIM and senescent cell antigen-like domains 1 Lims1  
1418231\_at 1.01843 LIM and senescent cell antigen-like domains 1 Lims1  
1418232\_s\_at 1.06847 LIM and senescent cell antigen-like domains 1 Lims1  
1418233\_a\_at 1.07653 trafficking protein particle complex 5 Trappc5  
1418234\_s\_at 0.94445 breast carcinoma amplified sequence 2 Bcas2  
1418235\_at 1.01458 autophagy-related 5 (yeast) Atg5  
1418236\_s\_at 1.01838 autophagy-related 5 (yeast) Atg5  
1418237\_s\_at 1.00791 "procollagen, type XVIII, alpha 1" Col18a1

1418238\_at 0.95753 isovaleryl coenzyme A dehydrogenase Ivd  
1418239\_at 0.89778 apolipoprotein F Apof  
1418240\_at 1.38599 guanylate nucleotide binding protein 2 Gbp2  
1418241\_at 0.98878 upstream transcription factor 2 Usf2  
1418242\_at 1.02596 Fas-associated factor 1 Faf1  
1418243\_at 0.84868 ficolin A Fcna  
1418244\_at 1.01507 "N-acetyltransferase 5 (ARD1 homolog, *S. cerevisiae*)" Nat5  
1418245\_a\_at 0.94846 RNA binding motif protein 9 Rbm9  
1418246\_at 1.01239 RNA binding motif protein 9 Rbm9  
1418247\_s\_at 1.01169 RNA binding motif protein 9 Rbm9  
1418248\_at 1.13355 "galactosidase, alpha" Gla  
1418249\_at 1.03093 calcitonin gene-related peptide-receptor component protein Crcp  
1418250\_at 0.73351 ADP-ribosylation factor 4-like Arfl4  
1418251\_at 0.89958 tubby-like protein 3 Tulp3  
1418252\_at 0.87931 "peptidyl arginine deiminase, type II /// similar to peptidyl arginine deiminase, type II" Padi2 /// LOC638935  
1418253\_a\_at 1.06891 heat shock protein 4 like Hspa4l  
1418254\_at 0.91675 APAF1 interacting protein Apip  
1418255\_s\_at 0.75916 serum response factor Srf  
1418256\_at 0.89397 serum response factor Srf  
1418257\_at 0.79408 "solute carrier family 12, member 7" Slc12a7  
1418258\_s\_at 0.97139 dynein light chain LC8-type 2 Dynll2  
1418259\_a\_at 0.88792 ectonucleoside triphosphate diphosphohydrolase 2 Entpd2  
1418260\_at 0.95497 hormonally upregulated Neu-associated kinase /// similar to hormonally upregulated Neu-associated kinase Hunk /// LOC630567  
1418261\_at 0.96973 spleen tyrosine kinase Syk  
1418262\_at 1.06117 spleen tyrosine kinase Syk  
1418263\_at 1.01921 DEAD (Asp-Glu-Ala-Asp) box polypeptide 25 Ddx25  
1418264\_at 0.95232 centromere protein K Cenpk  
1418265\_s\_at 0.99860 interferon regulatory factor 2 Irf2  
1418266\_at 1.01553 "arachidonate 12-lipoxygenase, 12R type" Alox12b  
1418267\_at 0.96355 macrophage stimulating 1 (hepatocyte growth factor-like) Mst1  
1418268\_at 0.98104 5-hydroxytryptamine (serotonin) receptor 3A Htr3a  
1418269\_at 0.86697 lysyl oxidase-like 3 Loxl3  
1418270\_at 1.00525 "a disintegrin-like and metallopeptidase (reprolysin type) with thrombospondin type 1 motif, 8" Adamts8  
1418271\_at 1.01506 "basic helix-loop-helix domain containing, class B5" Bhlhb5  
1418272\_at 0.86561 3-oxoacid CoA transferase 2A Oxct2a  
1418273\_a\_at 1.06138 ribosomal protein L30 /// similar to ribosomal protein L30 /// similar to ribosomal protein L30 /// similar to ribosomal protein L30 Rpl30 /// LOC666899 /// LOC670014 /// LOC675333 /// LOC677010  
1418274\_at 1.04703 nuclear transport factor 2 /// similar to Nuclear transport factor 2 (NTF-2) /// similar to Nuclear transport factor 2 (NTF-2) /// similar to Nuclear transport factor 2 (NTF-2) /// similar



to Nuclear transport factor 2 (NTF-2) Nutf2 /// LOC621832 /// LOC668830 /// LOC670887 ///  
LOC675580

1418275\_a\_at 0.92759 E74-like factor 2 Elf2  
1418276\_at 0.88729 E74-like factor 2 Elf2  
1418277\_at 0.96666 retinitis pigmentosa 9 homolog (human) Rp9h  
1418278\_at 0.90745 apolipoprotein C-III Apoc3  
1418279\_a\_at 0.99456 A kinase (PRKA) anchor protein 1 Akap1  
1418280\_at 1.03551 Kruppel-like factor 6 Klf6  
1418281\_at 1.07177 RAD51 homolog (S. cerevisiae) Rad51  
1418282\_x\_at 0.84477 "serine (or cysteine) preptidase inhibitor, clade A, member 1b" Serpina1b  
1418283\_at 1.04069 claudin 4 Cldn4  
1418284\_at 0.92815 vacuolar protein sorting 72 (yeast) Vps72  
1418285\_at 0.79557 ephrin B1 Efnb1  
1418286\_a\_at 0.82225 ephrin B1 Efnb1  
1418287\_a\_at 0.99057 deleted in malignant brain tumors 1 Dmbt1  
1418288\_at 1.24649 lipin 1 Lpin1  
1418289\_at 0.99323 nestin Nes  
1418290\_a\_at 0.98952 enhancer of zeste homolog 1 (Drosophila) Ezh1  
1418291\_at 0.85480 zinc finger protein 87 Zfp87  
1418292\_at 1.03293 "arsA (bacterial) arsenite transporter, ATP-binding, homolog 1" Asna1  
1418293\_at 0.93522 interferon-induced protein with tetratricopeptide repeats 2 Ifit2  
1418294\_at 0.53490 erythrocyte protein band 4.1-like 4b Epb4.114b  
1418295\_s\_at 0.93854 diacylglycerol O-acyltransferase 1 Dgat1  
1418296\_at 0.85146 FXYD domain-containing ion transport regulator 5 Fxyd5  
1418297\_at 0.78048 dihydropyrimidinase-like 4 Dpysl4  
1418298\_s\_at 1.05494 dihydropyrimidinase-like 4 Dpysl4  
1418299\_at 0.94905 dihydropyrimidinase-like 4 Dpysl4  
1418300\_a\_at 0.90000 MAP kinase-interacting serine/threonine kinase 2 Mknk2  
1418301\_at 0.92887 interferon regulatory factor 6 Irf6  
1418302\_at 0.93447 palmitoyl-protein thioesterase 2 Ppt2  
1418303\_at 1.03831 RIKEN cDNA 1700113O17 gene 1700113O17Rik  
1418304\_at 1.06557 protocadherin 21 Pcdh21  
1418305\_s\_at 1.13839 "nucleolar protein family A, member 1 (H/ACA small nucleolar RNPs)"  
Nola1  
1418306\_at 0.88951 "crystallin, beta B1" Crybb1  
1418307\_a\_at 0.96117 spermine binding protein Sbp  
1418308\_at 1.06118 Hus1 homolog (S. pombe) Hus1  
1418309\_at 0.99392 "tumor necrosis factor receptor superfamily, member 11b (osteoprotegerin)"  
Tnfrsf11b  
1418310\_a\_at 0.96949 retinaldehyde binding protein 1 Rlbp1  
1418311\_at 0.76561 fructosamine 3 kinase Fn3k  
1418312\_at 0.91769 zinc finger protein (C2H2 type) 276 Zfp276  
1418313\_at 0.97895 zinc finger protein (C2H2 type) 276 Zfp276

1418314\_a\_at 1.00514 ataxin 2 binding protein 1 A2bp1  
1418315\_at 0.96435 "nuclear receptor subfamily 5, group A, member 1" Nr5a1  
1418316\_a\_at 0.93947 MAP/microtubule affinity-regulating kinase 3 Mark3  
1418317\_at 0.90837 LIM homeobox protein 2 Lhx2  
1418318\_at 0.89038 ring finger protein 128 Rnf128  
1418319\_at 1.12075 RIKEN cDNA 1810047C23 gene 1810047C23Rik  
1418320\_at 1.12857 "protease, serine, 8 (prostasin)" Prss8  
1418321\_at 1.02157 "dodecenoyl-Coenzyme A delta isomerase (3,2 trans-enoyl-Coenzyme A isomerase)" Dci  
1418322\_at 0.84393 cAMP responsive element modulator Crem  
1418323\_at 0.89792 feminization 1 homolog b (C. elegans) Fem1b  
1418324\_at 1.02288 feminization 1 homolog b (C. elegans) Fem1b  
1418325\_at 0.99033 selenophosphate synthetase 2 Sephs2  
1418326\_at 1.11613 "solute carrier family 7 (cationic amino acid transporter, y+ system), member 5" Slc7a5  
1418327\_at 0.96580 RIKEN cDNA 1110058L19 gene 1110058L19Rik  
1418328\_at 0.98021 "carnitine palmitoyltransferase 1b, muscle" Cpt1b  
1418329\_at 0.99956 pyroglutamyl-peptidase I Pgpep1  
1418330\_at 0.99973 CCCTC-binding factor Ctf  
1418331\_at 0.96078 RIKEN cDNA 1110031I02 gene 1110031I02Rik  
1418332\_a\_at 0.90009 ATP/GTP binding protein 1 /// similar to ATP/GTP binding protein 1 Agtpbp1 /// LOC671356  
1418333\_at 1.13955 metal response element binding transcription factor 1 Mtf1  
1418334\_at 1.04712 DBF4 homolog (S. cerevisiae) Dbf4  
1418335\_a\_at 0.99928 DPH1 homolog (S. cerevisiae) /// candidate tumor suppressor OVCA2 Dph1 /// RP23-143A14.5  
1418336\_at 1.08333 AFG3(ATPase family gene 3)-like 1 (yeast) Afg311  
1418337\_at 1.24679 ribose 5-phosphate isomerase A Rpia  
1418338\_at 0.93266 WD repeat domain 33 Wdr33  
1418339\_at 0.97703 RecQ protein-like Recql  
1418340\_at 0.95394 "Fc receptor, IgE, high affinity I, gamma polypeptide" Fcer1g  
1418341\_at 0.91784 "RAB4A, member RAS oncogene family" Rab4a  
1418342\_at 1.01042 replication factor C 1 Recc1  
1418343\_at 0.89972 GTF2I repeat domain containing 2 Gtf2ird2  
1418344\_at 1.05758 transmembrane protein 8 (five membrane-spanning domains) Tmem8  
1418345\_at 1.28481 "tumor necrosis factor (ligand) superfamily, member 13 /// tumor necrosis factor (ligand) superfamily, member 12-member 13" Tnfsf13 /// Tnfsf12-tnfsf13  
1418346\_at 0.75898 insulin-like 6 Insl6  
1418347\_at 1.08817 coiled-coil domain containing 22 Ccdc22  
1418348\_a\_at 1.15720 activating signal cointegrator 1 complex subunit 2 Ascc2  
1418349\_at 0.98060 heparin-binding EGF-like growth factor Hbegf  
1418350\_at 0.95156 heparin-binding EGF-like growth factor Hbegf  
1418351\_a\_at 1.00331 DNA methyltransferase 3B Dnmt3b

1418352\_at 0.98300 hydroxysteroid (17-beta) dehydrogenase 2 Hsd17b2  
1418353\_at 0.93290 CD5 antigen Cd5  
1418354\_at 0.90564 component of oligomeric golgi complex 1 Cog1  
1418355\_at 1.08799 nucleobindin 2 Nucb2  
1418356\_at 0.93919 mercaptopyruvate sulfurtransferase Mpst  
1418357\_at 0.78096 forkhead box G1 Foxg1  
1418358\_at 0.95681 sperm mitochondria-associated cysteine-rich protein Smcp  
1418359\_at 1.23892 Williams Beuren syndrome chromosome region 27 (human) Wbscr27  
1418360\_at 1.09876 zinc finger protein 179 Zfp179  
1418361\_at 0.92995 growth arrest specific 8 Gas8  
1418362\_at 0.91485 zinc finger protein 42 Zfp42  
1418363\_at 0.97290 "lactalbumin, alpha" Lalba  
1418364\_a\_at 1.15670 ferritin light chain 1 Ft11  
1418365\_at 0.87319 cathepsin H Ctsh  
1418366\_at 0.98419 "histone 2, H3c1 /// histone 2, H2aa1 /// histone 1, H2ad /// histone 1, H2an ///  
histone 2, H2ab /// histone 2, H2ac /// histone 2, H2aa2" Hist2h3c1 /// Hist2h2aa1 /// Hist1h2ad ///  
Hist1h2an /// Hist2h2ab /// Hist2h2ac /// Hist2h2aa2  
1418367\_x\_at 0.95200 "histone 2, H3c1 /// histone 2, H2aa1 /// histone 1, H2ad /// histone 1, H2an ///  
histone 2, H2ab /// histone 2, H2ac /// histone 2, H2aa2" Hist2h3c1 /// Hist2h2aa1 /// Hist1h2ad ///  
Hist1h2an /// Hist2h2ab /// Hist2h2ac /// Hist2h2aa2  
1418368\_at 0.98288 resistin like beta Retnlb  
1418369\_at 0.94726 "DNA primase, p49 subunit" Prim1  
1418370\_at 0.95711 "troponin C, cardiac/slow skeletal" Tnnc1  
1418371\_at 1.00879 dynein light chain LC8-type 2 Dynll2  
1418372\_at 1.06314 adenylosuccinate lyase Adsl  
1418373\_at 0.94470 phosphoglycerate mutase 2 Pgam2  
1418374\_at 0.66440 FXYD domain-containing ion transport regulator 3 Fxyd3  
1418375\_at 1.04079 methyl-CpG binding domain protein 6 Mbd6  
1418376\_at 1.05547 fibroblast growth factor 15 Fgf15  
1418377\_a\_at 1.03602 Cd27 binding protein (Hindu God of destruction) Siva  
1418378\_at 0.83331 bactericidal/permeability-increasing protein-like 1 Bpil1  
1418379\_s\_at 0.84513 G protein-coupled receptor 124 Gpr124  
1418380\_at 1.05788 telomeric repeat binding factor 1 Terf1  
1418381\_at 0.93888 zinc finger protein 148 Zfp148  
1418382\_at 0.53481 adenomatosis polyposis coli down-regulated 1 Apcdd1  
1418383\_at 0.89221 adenomatosis polyposis coli down-regulated 1 Apcdd1  
1418384\_at 0.99618 RIKEN cDNA 9430083G14 gene 9430083G14Rik  
1418385\_at 0.91350 CUE domain containing 2 Cuedc2  
1418386\_at 1.13854 RIKEN cDNA 2510005D08 gene 2510005D08Rik  
1418387\_at 1.18616 RIKEN cDNA 4930548G07 gene 4930548G07Rik  
1418388\_s\_at 1.10589 RIKEN cDNA 4930548G07 gene 4930548G07Rik  
1418389\_at 1.06523 RIKEN cDNA 2810453I06 gene 2810453I06Rik  
1418390\_at 0.93418 PHD finger protein 21A Phf21a

1418391\_at 0.94795 PHD finger protein 21A Phf21a  
1418392\_a\_at 1.68492 guanylate nucleotide binding protein 4 Gbp4  
1418393\_a\_at 0.79204 integrin alpha 7 Itga7  
1418394\_a\_at 0.94930 CD97 antigen Cd97  
1418395\_at 0.89657 RIKEN cDNA 1300013J15 gene 1300013J15Rik  
1418396\_at 1.09835 "G-protein signalling modulator 3 (AGS3-like, C. elegans)" Gpsm3  
1418397\_at 0.96630 zinc finger protein 275 Zfp275  
1418398\_a\_at 0.89783 tetraspanin 32 Tspan32  
1418399\_at 1.07994 potassium channel tetramerisation domain containing 9 Kctd9  
1418400\_at 0.95491 "La ribonucleoprotein domain family, member 6" Larp6  
1418401\_a\_at 1.02534 dual specificity phosphatase 16 Dusp16  
1418402\_at 1.03990 a disintegrin and metallopeptidase domain 19 (meltrin beta) Adam19  
1418403\_at 0.94578 a disintegrin and metallopeptidase domain 19 (meltrin beta) Adam19  
1418404\_at 0.96623 RAD9 homolog (S. pombe) Rad9  
1418405\_at 0.91674 hepatocyte growth factor activator Hgfac  
1418406\_at 0.85768 phosphodiesterase 8A Pde8a  
1418407\_at 0.93727 phosphodiesterase 8A Pde8a  
1418408\_at 0.80720 "zinc finger, AN1-type domain 1" Zfand1  
1418409\_at 0.84062 jerky Jrk  
1418410\_at 0.95875 jerky Jrk  
1418411\_at 0.92402 F-box and leucine-rich repeat protein 8 Fbxl8  
1418412\_at 0.95414 tumor protein D52-like 1 Tpd52l1  
1418413\_at 1.02578 caveolin 3 Cav3  
1418414\_at 0.90202 "potassium voltage-gated channel, subfamily H (eag-related), member 1" Kcnh1  
1418415\_at 1.09204 homeo box B5 Hoxb5  
1418416\_x\_at 1.02575 pregnancy-specific glycoprotein 23 Psg23  
1418417\_at 1.01342 musculin Msc  
1418418\_a\_at 1.05708 prolactin-like protein C 1 Prlpc1  
1418419\_at 0.98152 F-box and leucine-rich repeat protein 20 Fbxl20  
1418420\_at 0.89915 myogenic differentiation 1 Myod1  
1418421\_at 1.12667 "B-cell CLL/lymphoma 6, member B" Bcl6b  
1418422\_at 0.97944 "serine (or cysteine) peptidase inhibitor, clade B, member 9g" Serpinb9g  
1418423\_s\_at 0.98699 "serine (or cysteine) peptidase inhibitor, clade B, member 9f /// serine (or cysteine) peptidase inhibitor, clade B, member 9e /// serine (or cysteine) peptidase inhibitor, clade B, member 9g /// similar to serine (or cysteine) proteinase inhibitor, clade B, member 9f" Serpinb9f /// Serpinb9e /// Serpinb9g /// LOC544923  
1418424\_at 1.14669 tumor necrosis factor alpha induced protein 6 Tnfaip6  
1418425\_at 0.85288 trans-acting transcription factor 7 Sp7  
1418426\_at 0.92272 "general transcription factor II A, 1-like factor" Gtf2a1lf  
1418427\_at 1.06323 kinesin family member 5B Kif5b  
1418428\_at 0.99238 kinesin family member 5B Kif5b  
1418429\_at 1.02757 kinesin family member 5B Kif5b  
1418430\_at 1.04446 kinesin family member 5B Kif5b

|              |         |                                                                                                     |            |
|--------------|---------|-----------------------------------------------------------------------------------------------------|------------|
| 1418431_at   | 1.04119 | kinesin family member 5B                                                                            | Kif5b      |
| 1418432_at   | 0.96502 | calcium binding protein 39                                                                          | Cab39      |
| 1418433_at   | 0.99707 | calcium binding protein 39                                                                          | Cab39      |
| 1418434_at   | 0.93451 | "makorin, ring finger protein, 1"                                                                   | Mkrn1      |
| 1418435_at   | 0.97373 | "makorin, ring finger protein, 1"                                                                   | Mkrn1      |
| 1418436_at   | 1.03524 | syntaxin 7                                                                                          | Stx7       |
| 1418437_a_at | 0.94276 | MAX-like protein X                                                                                  | Mlx        |
| 1418438_at   | 0.87473 | "fatty acid binding protein 2, intestinal"                                                          | Fabp2      |
| 1418439_at   | 1.00158 | "DNA segment, Chr 10, ERATO Doi 322, expressed"                                                     | D10Ert322e |
| 1418440_at   | 1.06235 | "procollagen, type VIII, alpha 1"                                                                   | Col8a1     |
| 1418441_at   | 1.07135 | "procollagen, type VIII, alpha 1"                                                                   | Col8a1     |
| 1418442_at   | 1.03276 | "exportin 1, CRM1 homolog (yeast)"                                                                  | Xpo1       |
| 1418443_at   | 1.11813 | "exportin 1, CRM1 homolog (yeast)"                                                                  | Xpo1       |
| 1418444_a_at | 1.12695 | membrane interacting protein of RGS16                                                               | Mir16      |
| 1418445_at   | 1.12115 | ---                                                                                                 | ---        |
| 1418446_at   | 0.97412 | "solute carrier family 16 (monocarboxylic acid transporters), member 2"                             | Slc16a2    |
| 1418447_at   | 0.93014 | "golgi autoantigen, golgin subfamily a, 5"                                                          | Golga5     |
| 1418448_at   | 1.16793 | "Harvey rat sarcoma oncogene, subgroup R"                                                           | Rras       |
| 1418449_at   | 0.61308 | ladinin                                                                                             | Lad1       |
| 1418450_at   | 0.54241 | immunoglobulin superfamily containing leucine-rich repeat                                           | Islr       |
| 1418451_at   | 0.86047 | "guanine nucleotide binding protein (G protein), gamma 2 subunit"                                   | Gng2       |
| 1418452_at   | 1.08397 | "guanine nucleotide binding protein (G protein), gamma 2 subunit"                                   | Gng2       |
| 1418453_a_at | 0.71759 | "ATPase, Na <sup>+</sup> /K <sup>+</sup> transporting, beta 1 polypeptide"                          | Atp1b1     |
| 1418454_at   | 1.10746 | microfibrillar associated protein 5                                                                 | Mfap5      |
| 1418455_at   | 0.72607 | "coatamer protein complex, subunit zeta 2"                                                          | Copz2      |
| 1418456_a_at | 1.02705 | chemokine (C-X-C motif) ligand 14                                                                   | Cxcl14     |
| 1418457_at   | 1.22893 | chemokine (C-X-C motif) ligand 14                                                                   | Cxcl14     |
| 1418458_at   | 1.02351 | anaphase promoting complex subunit 7                                                                | Anapc7     |
| 1418459_at   | 1.16688 | coiled-coil domain containing 91                                                                    | Ccdc91     |
| 1418460_at   | 0.98116 | SH3 domain protein D19                                                                              | Sh3d19     |
| 1418461_at   | 1.02626 | SH3 domain protein D19                                                                              | Sh3d19     |
| 1418462_at   | 1.04527 | exosome component 9                                                                                 | Exosc9     |
| 1418463_at   | 0.92669 | "phosphatidylinositol 3-kinase, regulatory subunit, polypeptide 2 (p85 beta)"                       | Pik3r2     |
| 1418464_at   | 0.82588 | matrilin 4                                                                                          | Matn4      |
| 1418465_at   | 1.20924 | neutrophil cytosolic factor 4                                                                       | Ncf4       |
| 1418466_at   | 1.07680 | ring finger protein 141                                                                             | Rnf141     |
| 1418467_at   | 0.74982 | "SWI/SNF related, matrix associated, actin dependent regulator of chromatin, subfamily d, member 3" | Smardc3    |
| 1418468_at   | 0.93156 | annexin A11                                                                                         | Anxa11     |
| 1418469_at   | 0.93519 | nuclear receptor interacting protein 1                                                              | Nrip1      |
| 1418470_at   | 0.86578 | Yamaguchi sarcoma viral (v-yes) oncogene homolog 1                                                  | Yes1       |
| 1418471_at   | 1.05193 | placental growth factor                                                                             | Pgf        |

|              |         |                                                                  |               |
|--------------|---------|------------------------------------------------------------------|---------------|
| 1418472_at   | 0.93422 | aspartoacylase (aminoacylase) 2                                  | Aspa          |
| 1418473_at   | 0.93152 | cutC copper transporter homolog (E.coli)                         | Cutc          |
| 1418474_at   | 1.07525 | RIKEN cDNA 1500005A01 gene                                       | 1500005A01Rik |
| 1418475_at   | 0.99160 | "sodium channel, nonvoltage-gated 1 beta"                        | Scnn1b        |
| 1418476_at   | 0.63286 | cytokine receptor-like factor 1                                  | Crlf1         |
| 1418477_at   | 1.19457 | "matrilin 1, cartilage matrix protein 1"                         | Matn1         |
| 1418478_at   | 0.99242 | LIM domain only 1                                                | Lmo1          |
| 1418479_at   | 1.04409 | vacuolar protein sorting 54 (yeast)                              | Vps54         |
| 1418480_at   | 0.98785 | chemokine (C-X-C motif) ligand 7                                 | Cxcl7         |
| 1418481_at   | 1.02892 | "protein kinase, membrane associated tyrosine/threonine 1"       | Pkmyt1        |
| 1418482_at   | 0.95306 | cytochrome b-561 domain containing 2                             | Cyb561d2      |
| 1418483_a_at | 1.13568 | "glycoprotein galactosyltransferase alpha 1, 3"                  | Ggta1         |
| 1418484_at   | 0.96601 | tektin 2                                                         | Tekt2         |
| 1418485_at   | 0.80040 | "solute carrier family 4 (anion exchanger), member 3"            | Slc4a3        |
| 1418486_at   | 1.29981 | vanin 1                                                          | Vnn1          |
| 1418487_at   | 0.87629 | receptor-interacting serine-threonine kinase 4                   | Ripk4         |
| 1418488_s_at | 0.89726 | receptor-interacting serine-threonine kinase 4                   | Ripk4         |
| 1418489_a_at | 0.94159 | calcitonin receptor-like                                         | Calcr1        |
| 1418490_at   | 0.90477 | serine dehydratase-like                                          | Sdsl          |
| 1418491_a_at | 1.04680 | pseudouridine synthase 3                                         | Pus3          |
| 1418492_at   | 0.93587 | "gremlin 2 homolog, cysteine knot superfamily (Xenopus laevis)"  | Grem2         |
| 1418493_a_at | 0.87696 | "synuclein, alpha"                                               | Snca          |
| 1418494_at   | 0.96649 | early B-cell factor 2                                            | Ebf2          |
| 1418495_at   | 1.17527 | zinc finger CCCH type containing 8                               | Zc3h8         |
| 1418496_at   | 0.63891 | forkhead box A1                                                  | Foxa1         |
| 1418497_at   | 0.87350 | fibroblast growth factor 13                                      | Fgf13         |
| 1418498_at   | 0.98653 | fibroblast growth factor 13                                      | Fgf13         |
| 1418499_a_at | 0.96914 | "potassium voltage-gated channel, Isk-related subfamily, gene 3" | Kcne3         |
| 1418500_at   | 0.88596 | nucleosome assembly protein 1-like 3                             | Nap113        |
| 1418501_a_at | 0.90977 | oxidation resistance 1                                           | Oxr1          |
| 1418502_a_at | 0.95502 | oxidation resistance 1                                           | Oxr1          |
| 1418503_at   | 1.09365 | heat shock protein 9A                                            | Hspa9a        |
| 1418504_at   | 1.11541 | heat shock protein 9A                                            | Hspa9a        |
| 1418505_at   | 0.86267 | nudix (nucleoside diphosphate linked moiety X)-type motif 4      | Nudt4         |
| 1418506_a_at | 0.91993 | peroxiredoxin 2                                                  | Prdx2         |
| 1418507_s_at | 0.38764 | suppressor of cytokine signaling 2                               | Socs2         |
| 1418508_a_at | 0.95953 | growth factor receptor bound protein 2                           | Grb2          |
| 1418509_at   | 0.43678 | carbonyl reductase 2                                             | Cbr2          |
| 1418510_s_at | 0.86629 | F-box only protein 8                                             | Fbxo8         |
| 1418511_at   | 1.15444 | dermatopontin                                                    | Dpt           |
| 1418512_at   | 0.95252 | "serine/threonine kinase 3 (Ste20, yeast homolog)"               | Stk3          |
| 1418513_at   | 0.96346 | "serine/threonine kinase 3 (Ste20, yeast homolog)"               | Stk3          |
| 1418514_at   | 1.01234 | metal response element binding transcription factor 2            | Mtf2          |

|              |         |                                                                                                                                                                                                   |                         |
|--------------|---------|---------------------------------------------------------------------------------------------------------------------------------------------------------------------------------------------------|-------------------------|
| 1418515_at   | 1.01251 | metal response element binding transcription factor 2                                                                                                                                             | Mtf2                    |
| 1418516_at   | 1.00766 | metal response element binding transcription factor 2                                                                                                                                             | Mtf2                    |
| 1418517_at   | 0.69596 | Iroquois related homeobox 3 (Drosophila)                                                                                                                                                          | Irx3                    |
| 1418518_at   | 0.86213 | furin (paired basic amino acid cleaving enzyme)                                                                                                                                                   | Furin                   |
| 1418519_at   | 1.04276 | aminoadipate aminotransferase                                                                                                                                                                     | Aadat                   |
| 1418520_at   | 0.94368 | trans-golgi network protein                                                                                                                                                                       | Tgoln1                  |
| 1418521_a_at | 1.02503 | metaxin 1                                                                                                                                                                                         | Mtx1                    |
| 1418522_at   | 1.00966 | metaxin 1                                                                                                                                                                                         | Mtx1                    |
| 1418523_at   | 1.20720 | ariadne homolog 2 (Drosophila)                                                                                                                                                                    | Arih2                   |
| 1418524_at   | 0.96109 | pericentriolar material 1                                                                                                                                                                         | Pcm1                    |
| 1418525_at   | 0.90067 | pericentriolar material 1                                                                                                                                                                         | Pcm1                    |
| 1418526_at   | 1.02400 | FUS interacting protein (serine-arginine rich) 1                                                                                                                                                  | Fusip1                  |
| 1418527_a_at | 1.03783 | FUS interacting protein (serine-arginine rich) 1                                                                                                                                                  | Fusip1                  |
| 1418528_a_at | 1.01182 | defender against cell death 1                                                                                                                                                                     | Dad1                    |
| 1418529_at   | 1.09979 | O-sialoglycoprotein endopeptidase                                                                                                                                                                 | Osgep                   |
| 1418530_at   | 1.03479 | nucleoporin 160                                                                                                                                                                                   | Nup160                  |
| 1418531_at   | 1.04532 | oocyte secreted protein 1                                                                                                                                                                         | Oosp1                   |
| 1418532_at   | 0.89441 | frizzled homolog 2 (Drosophila)                                                                                                                                                                   | Fzd2                    |
| 1418533_s_at | 0.90332 | frizzled homolog 2 (Drosophila)                                                                                                                                                                   | Fzd2                    |
| 1418534_at   | 0.81222 | ---                                                                                                                                                                                               | ---                     |
| 1418535_at   | 0.80119 | "ral guanine nucleotide dissociation stimulator,-like 1"                                                                                                                                          | Rgl1                    |
| 1418536_at   | 1.36802 | "similar to H-2 class I histocompatibility antigen, Q7 alpha chain precursor (QA-2 antigen) /// region containing histocompatibility 2, Q region locus 9; histocompatibility 2, Q region locus 7" | LOC630509 /// LOC674192 |
| 1418537_at   | 1.08209 | RIKEN cDNA 0610042E07 gene                                                                                                                                                                        | 0610042E07Rik           |
| 1418538_at   | 0.79600 | KDEL (Lys-Asp-Glu-Leu) endoplasmic reticulum protein retention receptor 3                                                                                                                         | Kdelr3                  |
| 1418539_a_at | 1.83979 | "protein tyrosine phosphatase, receptor type, E"                                                                                                                                                  | Ptpre                   |
| 1418540_a_at | 1.40858 | "protein tyrosine phosphatase, receptor type, E"                                                                                                                                                  | Ptpre                   |
| 1418541_at   | 1.08075 | centromere protein O                                                                                                                                                                              | Cenpo                   |
| 1418542_s_at | 1.02984 | centromere protein O                                                                                                                                                                              | Cenpo                   |
| 1418543_s_at | 0.99372 | coiled-coil domain containing 43                                                                                                                                                                  | Ccdc43                  |
| 1418544_at   | 0.93292 | "Kv channel interacting protein 3, calsenilin"                                                                                                                                                    | Kcnip3                  |
| 1418545_at   | 1.00479 | WASP family 1                                                                                                                                                                                     | Wasf1                   |
| 1418546_a_at | 0.97144 | Stam binding protein like 1                                                                                                                                                                       | Stamp1l                 |
| 1418547_at   | 0.99039 | tissue factor pathway inhibitor 2                                                                                                                                                                 | Tfpi2                   |
| 1418548_at   | 0.92550 | seminal vesicle secretion 6                                                                                                                                                                       | Svs6                    |
| 1418549_at   | 0.96127 | "glycoprotein hormones, alpha subunit"                                                                                                                                                            | Cga                     |
| 1418550_x_at | 0.99435 | defensin related sequence cryptdin peptide (paneth cells)                                                                                                                                         | Defcr-rs1               |
| 1418551_at   | 0.63284 | "myosin binding protein C, cardiac"                                                                                                                                                               | Mybpc3                  |
| 1418552_at   | 0.79740 | "opsin 1 (cone pigments), short-wave-sensitive (color blindness, tritan)"                                                                                                                         | Opn1sw                  |
| 1418553_at   | 0.95475 | rho/rac guanine nucleotide exchange factor (GEF) 18                                                                                                                                               | Arhgef18                |

|              |         |                                                                                         |                    |           |
|--------------|---------|-----------------------------------------------------------------------------------------|--------------------|-----------|
| 1418554_at   | 1.07644 | adrenomedullin receptor                                                                 | Admr               |           |
| 1418555_x_at | 0.90244 | Spi-C transcription factor (Spi-1/PU.1 related)                                         | Spic               |           |
| 1418556_at   | 0.93481 | "capping protein (actin filament) muscle Z-line, alpha 3"                               | Capza3             | Capza3    |
| 1418557_s_at | 0.89175 | testis-specific serine kinase 3                                                         | Tssk3              |           |
| 1418558_at   | 0.99530 | retina and anterior neural fold homeobox                                                | Rax                | Rax       |
| 1418559_at   | 1.03243 | testicular serine protease 1                                                            | Tesp1              |           |
| 1418560_at   | 1.03830 | pyruvate dehydrogenase E1 alpha 1                                                       | Pdha1              | Pdha1     |
| 1418561_at   | 0.92662 | "splicing factor 3b, subunit 1"                                                         | Sf3b1              |           |
| 1418562_at   | 1.11664 | "splicing factor 3b, subunit 1"                                                         | Sf3b1              |           |
| 1418563_at   | 0.97998 | Serpine1 mRNA binding protein 1                                                         | Serbp1             |           |
| 1418564_s_at | 1.04356 | Serpine1 mRNA binding protein 1                                                         | Serbp1             |           |
| 1418565_at   | 0.80384 | Serpine1 mRNA binding protein 1                                                         | Serbp1             |           |
| 1418566_s_at | 1.02658 | NudC domain containing 2                                                                | Nudcd2             |           |
| 1418567_a_at | 1.02854 | signal recognition particle 14                                                          | Srp14              |           |
| 1418568_x_at | 1.03045 | signal recognition particle 14                                                          | Srp14              |           |
| 1418569_at   | 0.94052 | filamin binding LIM protein 1                                                           | Fblim1             |           |
| 1418570_at   | 0.96972 | nicastrin                                                                               | Ncstn              |           |
| 1418571_at   | 1.07855 | "tumor necrosis factor receptor superfamily, member 12a"                                | Tnfrsf12a          | Tnfrsf12a |
| 1418572_x_at | 1.05725 | "tumor necrosis factor receptor superfamily, member 12a"                                | Tnfrsf12a          | Tnfrsf12a |
| 1418573_a_at | 0.99860 | hnRNP-associated with lethal yellow                                                     | Raly               |           |
| 1418574_a_at | 0.93562 | split hand/foot malformation (ectrodactyly) type 1                                      | Shfm1              | Shfm1     |
| 1418575_at   | 0.96039 | split hand/foot malformation (ectrodactyly) type 1                                      | Shfm1              | Shfm1     |
| 1418576_at   | 0.85637 | "Yip1 domain family, member 5"                                                          | Yipf5              |           |
| 1418577_at   | 1.05068 | tripartite motif protein 8                                                              | Trim8              |           |
| 1418578_at   | 0.88457 | "diacylglycerol kinase, alpha"                                                          | Dgka               |           |
| 1418579_at   | 0.92731 | centrin 2                                                                               | Cetn2              |           |
| 1418580_at   | 1.34205 | receptor transporter protein 4                                                          | Rtp4               |           |
| 1418581_a_at | 1.02110 | LIM motif-containing protein kinase 2                                                   | Limk2              |           |
| 1418582_at   | 0.75397 | "core-binding factor, runt domain, alpha subunit 2, translocated to, 3 homolog (human)" | Cbfa2t3h           |           |
| 1418583_at   | 1.02643 | histidine triad nucleotide binding protein 3                                            | Hint3              |           |
| 1418584_at   | 1.11291 | cyclin H /// similar to cyclin H                                                        | Ccnh /// LOC672655 |           |
| 1418585_at   | 0.91345 | cyclin H                                                                                | Ccnh               |           |
| 1418586_at   | 1.00290 | adenylate cyclase 9                                                                     | Adcy9              |           |
| 1418587_at   | 1.21231 | Tnf receptor-associated factor 3                                                        | Traf3              |           |
| 1418588_at   | 0.88895 | neurensin 1                                                                             | Nrsn1              |           |
| 1418589_a_at | 0.88434 | myeloid leukemia factor 1                                                               | Mlf1               |           |
| 1418590_at   | 0.99493 | karyopherin (importin) alpha 6                                                          | Kpna6              |           |
| 1418591_at   | 0.89408 | "DnaJ (Hsp40) homolog, subfamily A, member 4"                                           | Dnaja4             |           |
| 1418592_at   | 0.99297 | "DnaJ (Hsp40) homolog, subfamily A, member 4"                                           | Dnaja4             |           |
| 1418593_at   | 0.92918 | "TAF6 RNA polymerase II, TATA box binding protein (TBP)-associated factor"              | Taf6               |           |
| 1418594_a_at | 0.74046 | nuclear receptor coactivator 1                                                          | Ncoa1              |           |





dehydrogenase (GAPDH) /// similar to Glyceraldehyde-3-phosphate dehydrogenase (GAPDH) /// similar  
 to Glyceraldehyde-3-phosphate dehydrogenase (GAPDH) /// similar to glyceraldehyde-3-phosphate  
 dehydrogenase /// glyceraldehyde-3-phosphate dehydrogenase pseudogene /// similar to Glyceraldehyde-  
 3-phosphate dehydrogenase (GAPDH) /// similar to Glyceraldehyde-3-phosphate dehydrogenase  
 (GAPDH) /// similar to Glyceraldehyde-3-phosphate dehydrogenase (GAPDH) /// similar to  
 Glyceraldehyde-3-phosphate dehydrogenase (GAPDH) /// similar to Glyceraldehyde-3-phosphate  
 dehydrogenase (GAPDH) /// similar to Glyceraldehyde-3-phosphate dehydrogenase (GAPDH) /// similar  
 to Glyceraldehyde-3-phosphate dehydrogenase (GAPDH) /// similar to Glyceraldehyde-3-phosphate  
 dehydrogenase (GAPDH) /// similar to Glyceraldehyde-3-phosphate dehydrogenase (GAPDH) /// similar  
 to Glyceraldehyde-3-phosphate dehydrogenase (GAPDH) /// similar to Glyceraldehyde-3-phosphate  
 dehydrogenase (GAPDH) /// similar to Glyceraldehyde-3-phosphate dehydrogenase (GAPDH)  
 LOC14433 /// LOC219102 /// LOC224508 /// LOC230044 /// LOC242823 /// 3000002C10Rik ///  
 LOC380687 /// LOC384643 /// Gapdh /// LOC432919 /// LOC433184 /// LOC433273 /// LOC435292 ///  
 LOC545984 /// LOC622365 /// LOC630967 /// LOC632720 /// LOC633247 /// RP23-227C11.3 ///  
 LOC666342 /// LOC666488 /// LOC667170 /// LOC668426 /// LOC669993 /// LOC670403 ///  
 LOC671133 /// LOC672308 /// LOC675199 /// LOC675385 /// LOC675515 /// LOC676292  
 1418626\_a\_at 0.82082 clusterin Clu  
 1418627\_at 0.88306 "glutamate-cysteine ligase , modifier subunit" Gclm  
 1418628\_at 1.01435 "KH domain containing, RNA binding, signal transduction associated 1"  
 Khdrbs1  
 1418629\_a\_at 0.94308 --- ---  
 1418630\_at 1.18952 "KH domain containing, RNA binding, signal transduction associated 1"  
 Khdrbs1  
 1418631\_at 0.92321 ubiquitin-conjugating enzyme E2H Ube2h  
 1418632\_at 0.83984 ubiquitin-conjugating enzyme E2H Ube2h  
 1418633\_at 0.89857 Notch gene homolog 1 (Drosophila) Notch1  
 1418634\_at 0.89011 Notch gene homolog 1 (Drosophila) Notch1  
 1418635\_at 1.09532 ets variant gene 3 Etv3  
 1418636\_at 1.06219 ets variant gene 3 Etv3  
 1418637\_at 1.06572 ets variant gene 3 Etv3  
 1418638\_at 1.06367 "histocompatibility 2, class II, locus Mb1" H2-DMb1  
 1418639\_at 0.87351 surfactant associated protein C Sftpc  
 1418640\_at 0.94735 "sirtuin 1 ((silent mating type information regulation 2, homolog) 1 (S.  
 cerevisiae)" Sirt1  
 1418641\_at 0.97639 lymphocyte cytosolic protein 2 Lcp2  
 1418642\_at 0.94096 lymphocyte cytosolic protein 2 Lcp2  
 1418643\_at 0.88433 tetraspanin 13 Tspan13  
 1418644\_a\_at 0.97509 serine/threonine kinase 11 Stk11  
 1418645\_at 0.92893 histidine ammonia lyase /// similar to Histidine ammonia-lyase (Histidase)  
 Hal /// LOC638196  
 1418646\_at 1.03798 "guanine nucleotide binding protein, related sequence 1" Gna-rs1  
 1418647\_at 0.94874 --- ---  
 1418648\_at 1.23358 EGL nine homolog 3 (C. elegans) EglN3

1418649\_at 1.33106 EGL nine homolog 3 (C. elegans) Egl3  
1418650\_at 0.73874 spermatogenesis associated 6 Spata6  
1418651\_at 0.76492 spermatogenesis associated 6 Spata6  
1418652\_at 0.99055 chemokine (C-X-C motif) ligand 9 Cxcl9  
1418653\_at 0.91068 "cytochrome P450, family 2. subfamily c, polypeptide 37 /// cytochrome P450, family 2, subfamily c, polypeptide 50 /// cytochrome P450 /// similar to cytochrome P450" Cyp2c37 /// Cyp2c50 /// Cyp2c54 /// LOC639023  
1418654\_at 1.05666 hydroxyacid oxidase (glycolate oxidase) 3 Hao3  
1418655\_at 0.75000 "beta-1,4-N-acetyl-galactosaminyl transferase 1" B4galnt1  
1418656\_at 1.09236 "LSM5 homolog, U6 small nuclear RNA associated (S. cerevisiae)" Lsm5  
1418657\_at 0.98152 "zinc finger, HIT type 4" Znhit4  
1418658\_at 0.91912 RIKEN cDNA 2410005O16 gene 2410005O16Rik  
1418659\_at 1.06955 circadian locomoter output cycles kaput Clock  
1418660\_at 1.01228 circadian locomoter output cycles kaput /// hypothetical protein LOC620729 Clock /// LOC620729  
1418661\_at 0.98451 abhydrolase domain containing 2 Abhd2  
1418662\_at 0.92170 RIKEN cDNA 2210012G02 gene 2210012G02Rik  
1418663\_at 0.97065 multiple PDZ domain protein Mpdz  
1418664\_at 0.90968 multiple PDZ domain protein Mpdz  
1418665\_at 1.00462 inositol (myo)-1(or 4)-monophosphatase 2 Impa2  
1418666\_at 1.00705 pentraxin related gene Ptx3  
1418667\_at 1.17427 RIKEN cDNA 2410002O22 gene 2410002O22Rik  
1418668\_at 1.06842 acyl-CoA synthetase medium-chain family member 1 Acsm1  
1418669\_at 0.97561 perlecan (heparan sulfate proteoglycan 2) Hspg2  
1418670\_s\_at 0.93413 perlecan (heparan sulfate proteoglycan 2) Hspg2  
1418671\_at 0.93885 calpain 5 Capn5  
1418672\_at 0.90039 "aldo-keto reductase family 1, member C13" Akr1c13  
1418673\_at 1.00661 snail homolog 2 (Drosophila) Snai2  
1418674\_at 1.07435 oncostatin M receptor Osmr  
1418675\_at 0.96663 oncostatin M receptor Osmr  
1418676\_at 1.02224 insulin related protein 2 (islet 2) Isl2  
1418677\_at 0.88509 actinin alpha 3 Actn3  
1418678\_at 0.90708 hyaluronan synthase 2 Has2  
1418679\_at 1.11436 granzyme F Gzmf  
1418680\_at 0.89702 "serine (or cysteine) peptidase inhibitor, clade D, member 1" Serpind1  
1418681\_at 1.12409 glycosyltransferase 28 domain containing 1 Glt28d1  
1418682\_at 1.05989 testis nuclear RNA binding protein Tenr  
1418683\_at 1.05658 lin-7 homolog B (C. elegans) Lin7b  
1418684\_at 1.02022 RIKEN cDNA 2310012P17 gene 2310012P17Rik  
1418685\_at 1.16093 toll-interleukin 1 receptor (TIR) domain-containing adaptor protein Tirap  
1418686\_at 0.95592 2'-5' oligoadenylate synthetase 1C Oas1c  
1418687\_at 0.69073 activity regulated cytoskeletal-associated protein Arc  
1418688\_at 1.04404 calcitonin receptor Calcr

1418689\_at 0.96565 cathepsin 6 Cts6  
 1418690\_at 1.02203 "protein tyrosine phosphatase, receptor type Z, polypeptide 1" Ptporz1  
 1418691\_at 0.98299 regulator of G-protein signaling 9 Rgs9  
 1418692\_at 1.02943 "RAB8A, member RAS oncogene family" Rab8a  
 1418693\_at 0.97263 heterogeneous nuclear ribonucleoprotein C /// similar to heterogeneous nuclear ribonucleoprotein C /// similar to heterogeneous nuclear ribonucleoprotein C Hnrpc /// LOC620883 /// LOC676606  
 1418694\_at 0.98885 potassium channel modulatory factor 1 Kcmf1  
 1418695\_a\_at 1.05143 potassium channel modulatory factor 1 Kcmf1  
 1418696\_at 0.91996 cDNA sequence BC021608 BC021608  
 1418697\_at 0.44263 indolethylamine N-methyltransferase Inmt  
 1418698\_a\_at 0.99631 ferrocyclase Fech  
 1418699\_s\_at 0.96986 ferrocyclase Fech  
 1418700\_at 1.00407 lipoic acid synthetase Lias  
 1418701\_at 1.00672 catechol-O-methyltransferase Comt  
 1418702\_a\_at 0.99202 RIKEN cDNA 2810428I15 gene 2810428I15Rik  
 1418703\_at 1.01480 "RNA binding motif, single stranded interacting protein 1" Rbms1  
 1418704\_at 0.93663 S100 calcium binding protein A13 S100a13  
 1418705\_at 1.01780 cone-rod homeobox containing gene Crx  
 1418706\_at 0.94497 "solute carrier family 38, member 3" Slc38a3  
 1418707\_at 0.89770 BCL2-associated athanogene 4 Bag4  
 1418708\_at 1.04840 apolipoprotein C-IV Apoc4  
 1418709\_at 0.98088 "cytochrome c oxidase, subunit VIIa 1" Cox7a1  
 1418710\_at 0.83730 CD59a antigen Cd59a  
 1418711\_at 0.91409 "platelet derived growth factor, alpha" Pdgfa  
 1418712\_at 1.02926 CDC42 effector protein (Rho GTPase binding) 5 Cdc42ep5  
 1418713\_at 1.00097 pterin 4 alpha carbinolamine dehydratase/dimerization cofactor of hepatocyte nuclear factor 1 alpha (TCF1) 1 Pcbd1  
 1418714\_at 0.92597 dual specificity phosphatase 8 Dusp8  
 1418715\_at 1.02322 pantothenate kinase 1 Pank1  
 1418716\_at 0.96071 mitochondrial ribosomal protein S25 Mrps25  
 1418717\_at 0.90773 mitochondrial ribosomal protein S25 Mrps25  
 1418718\_at 1.32894 chemokine (C-X-C motif) ligand 16 Cxcl16  
 1418719\_at 0.82885 RIKEN cDNA 2410004L22 gene 2410004L22Rik  
 1418720\_at 0.91030 "COP9 (constitutive photomorphogenic) homolog, subunit 7b (Arabidopsis thaliana)" Cops7b  
 1418721\_at 0.89595 "COP9 (constitutive photomorphogenic) homolog, subunit 7b (Arabidopsis thaliana)" Cops7b  
 1418722\_at 0.85309 neutrophilic granule protein Ngp  
 1418723\_at 1.11056 "endothelial differentiation, lysophosphatidic acid G-protein-coupled receptor 7" Edg7  
 1418724\_at 0.93374 complement component factor i Cfi  
 1418725\_at 0.97499 "DnaJ (Hsp40) homolog, subfamily C, member 5 beta" Dnajc5b

1418726\_a\_at 0.74020 "troponin T2, cardiac" Tnnt2  
1418727\_at 1.16491 nucleoporin 155 Nup155  
1418728\_at 1.11367 steroidogenic acute regulatory protein Star  
1418729\_at 0.95150 steroidogenic acute regulatory protein Star  
1418730\_at 1.00246 ring finger protein 12 Rnf12  
1418731\_at 1.02188 ring finger protein 12 Rnf12  
1418732\_s\_at 1.09328 RIKEN cDNA 1500041N16 gene 1500041N16Rik  
1418733\_at 0.98014 twist gene homolog 1 (Drosophila) Twist1  
1418734\_at 0.99864 expressed sequence BE136769 BE136769  
1418735\_at 0.97775 keratin 4 Krt4  
1418736\_at 0.96763 "UDP-GalNAc:betaGlcNAc beta 1,3-galactosaminyltransferase, polypeptide 1" B3galnt1  
1418737\_at 1.10975 nudix (nucleoside diphosphate linked moiety X)-type motif 2 Nudt2  
1418738\_at 1.00983 "sodium channel, voltage-gated, type I, beta" Scn1b  
1418739\_at 1.05180 serum/glucocorticoid regulated kinase 2 Sgk2  
1418740\_at 1.11956 spermatid associated Spert  
1418741\_at 1.05822 integrin beta 7 Itgb7  
1418742\_at 0.90577 keratin 34 Krt34  
1418743\_a\_at 0.80531 tescalcin Tesc  
1418744\_s\_at 0.72234 tescalcin Tesc  
1418745\_at 0.67605 osteomodulin Omd  
1418746\_at 0.91483 paroxysmal nonkinesigenic dyskinesia Pnkd  
1418747\_at 0.95714 SFFV proviral integration 1 Sfp1  
1418748\_at 0.94512 caspase 14 Casp14  
1418749\_at 0.84195 pleckstrin and Sec7 domain containing 3 Psd3  
1418750\_at 0.93029 plexin B3 Plxnb3  
1418751\_at 0.93590 suppression inducing transmembrane adaptor 1 Sit1  
1418752\_at 1.81220 "aldehyde dehydrogenase family 3, subfamily A1" Aldh3a1  
1418753\_at 0.89762 glutamine fructose-6-phosphate transaminase 2 Gfpt2  
1418754\_at 1.01297 adenylate cyclase 8 Adcy8  
1418755\_at 0.91723 T-box 15 Tbx15  
1418756\_at 0.89501 thyrotropin releasing hormone Trh  
1418757\_at 0.85698 ring finger protein 36 Rnf36  
1418758\_a\_at 0.99624 "pleckstrin homology, Sec7 and coiled-coil domains 3" Pscd3  
1418759\_at 1.06456 "protein tyrosine phosphatase, non-receptor type 20" Ptpn20  
1418760\_at 1.25807 retinol dehydrogenase 11 Rdh11  
1418761\_at 1.18038 insulin-like growth factor 2 mRNA binding protein 1 Igf2bp1  
1418762\_at 1.01597 CD55 antigen Cd55  
1418763\_at 0.89354 "nitrilase family, member 2" Nit2  
1418764\_a\_at 1.14449 bisphosphate 3'-nucleotidase 1 Bpnt1  
1418765\_at 1.11611 T-cell immunoglobulin and mucin domain containing 2 Timd2  
1418766\_s\_at 0.96899 T-cell immunoglobulin and mucin domain containing 2 Timd2  
1418767\_at 0.89547 "cytochrome P450, family 4, subfamily f, polypeptide 13" Cyp4f13

1418768\_at 0.87312 optic atrophy 1 homolog (human) Opa1  
1418769\_at 0.99034 myozenin 2 Myoz2  
1418770\_at 1.01565 CD2 antigen Cd2  
1418771\_a\_at 0.96610 carboxypeptidase B2 (plasma) Cpb2  
1418772\_at 1.12255 cDNA sequence BC016423 BC016423  
1418773\_at 0.87182 fatty acid desaturase 3 Fads3  
1418774\_a\_at 0.99809 "ATPase, Cu++ transporting, alpha polypeptide" Atp7a  
1418775\_at 0.88489 expressed sequence AI837181 AI837181  
1418776\_at 1.04550 RIKEN cDNA 5830443L24 gene /// similar to macrophage activation 2 like  
5830443L24Rik /// LOC626578  
1418777\_at 1.05959 chemokine (C-C motif) ligand 25 Ccl25  
1418778\_at 1.05337 coiled-coil domain containing 109B Ccdc109b  
1418779\_at 0.95617 "RCE1 homolog, prenyl protein peptidase (S. cerevisiae)" Rce1  
1418780\_at 0.76192 "cytochrome P450, family 39, subfamily a, polypeptide 1" Cyp39a1  
1418781\_at 0.89541 NAT9 Nat9  
1418782\_at 0.94458 retinoid X receptor gamma Rxrg  
1418783\_at 1.08351 "transient receptor potential cation channel, subfamily M, member 5" Trpm5  
1418784\_at 0.94362 "glutamate receptor, ionotropic, kainate 5 (gamma 2)" Grik5  
1418785\_at 0.99819 mitogen-activated protein kinase 8 interacting protein 2 Mapk8ip2  
1418786\_at 0.95952 mitogen-activated protein kinase 8 interacting protein 2 Mapk8ip2  
1418787\_at 0.96690 mannose binding lectin (C) Mbl2  
1418788\_at 0.89338 endothelial-specific receptor tyrosine kinase Tek  
1418789\_at 1.00860 "syntrophin, gamma 2" Sntg2  
1418790\_at 1.00489 Fez family zinc finger 2 Fezf2  
1418791\_at 1.00273 SH3-domain GRB2-like 2 Sh3gl2  
1418792\_at 0.98277 SH3-domain GRB2-like 2 Sh3gl2  
1418793\_at 1.04878 "iduronidase, alpha-L-" Idua  
1418794\_at 1.01967 CDP-diacylglycerol synthase (phosphatidate cytidyltransferase) 2 Cds2  
1418795\_at 0.86957 CDP-diacylglycerol synthase (phosphatidate cytidyltransferase) 2 Cds2  
1418796\_at 1.07805 "C-type lectin domain family 11, member a" Clec11a  
1418797\_at 0.97323 "membrane-spanning 4-domains, subfamily A, member 8A" Ms4a8a  
1418798\_s\_at 0.93906 serine/arginine-rich protein specific kinase 3 Srpk3  
1418799\_a\_at 0.96224 "procollagen, type XVII, alpha 1" Col17a1  
1418800\_at 0.84691 "basic helix-loop-helix domain containing, class B, 8" Bhlhb8  
1418801\_at 0.78334 zinc finger with KRAB and SCAN domains 1 Zkscan1  
1418802\_at 0.92824 expressed sequence R74862 R74862  
1418803\_a\_at 1.13485 "Fas ligand (TNF superfamily, member 6)" FasL  
1418804\_at 1.09101 succinate receptor 1 Sucnr1  
1418805\_at 0.97897 secretin Sct  
1418806\_at 0.95878 colony stimulating factor 3 receptor (granulocyte) Csf3r  
1418807\_at 1.08394 RIKEN cDNA 3110070M22 gene 3110070M22Rik  
1418808\_at 1.05261 retinol dehydrogenase 5 Rdh5  
1418809\_at 0.94760 paired-Ig-like receptor A2 Pira2

1418810\_at 0.96941 corticotropin releasing hormone receptor 1 Crhr1  
1418811\_at 0.97710 BarH-like 1 (Drosophila) Barhl1  
1418812\_a\_at 0.92372 BarH-like 1 (Drosophila) Barhl1  
1418813\_at 1.00688 "serine (or cysteine) peptidase inhibitor, clade A, member 5" Serpina5  
1418814\_s\_at 0.98800 "NADH dehydrogenase (ubiquinone) 1 alpha subcomplex, 12" Ndufa12  
1418815\_at 1.00095 cadherin 2 Cdh2  
1418816\_at 0.91330 chromatin modifying protein 1B Chmp1b  
1418817\_at 0.87997 chromatin modifying protein 1B Chmp1b  
1418818\_at 1.13081 aquaporin 5 Aqp5  
1418819\_at 1.00247 ADP-ribosylation factor-like 8B Arl8b  
1418820\_s\_at 1.05526 "zinc finger, CCHC domain containing 10" Zcchc10  
1418821\_at 1.09432 "cytochrome P450, family 2, subfamily a, polypeptide 12" Cyp2a12  
1418822\_a\_at 0.91223 ADP-ribosylation factor 6 Arf6  
1418823\_at 0.89346 ADP-ribosylation factor 6 Arf6  
1418824\_at 0.67210 ADP-ribosylation factor 6 Arf6  
1418825\_at 0.87946 "immunity-related GTPase family, M" Irgm  
1418826\_at 0.96736 "membrane-spanning 4-domains, subfamily A, member 6B" Ms4a6b  
1418827\_at 0.96316 three prime histone mRNA exonuclease 1 Thex1  
1418828\_at 0.93226 three prime histone mRNA exonuclease 1 Thex1  
1418829\_a\_at 1.98889 "enolase 2, gamma neuronal" Eno2  
1418830\_at 0.94191 CD79A antigen (immunoglobulin-associated alpha) Cd79a  
1418831\_at 0.93862 plakophilin 3 Pkp3  
1418832\_at 0.91870 plakophilin 3 Pkp3  
1418833\_at 1.00701 alanine-glyoxylate aminotransferase Agxt  
1418834\_at 0.92085 cappuccino Cno  
1418835\_at 1.16165 "pleckstrin homology-like domain, family A, member 1" Phlda1  
1418836\_at 0.90811 quinolinate phosphoribosyltransferase Qprt  
1418837\_at 1.01044 quinolinate phosphoribosyltransferase Qprt  
1418838\_at 0.93398 "ATP-binding cassette, sub-family D (ALD), member 1" Abcd1  
1418839\_at 1.10367 "glomulin, FKBP associated protein" Glmn  
1418840\_at 0.82091 programmed cell death 4 /// similar to programmed cell death 4 Pdcd4 ///  
LOC670861  
1418841\_s\_at 0.96534 cell division cycle 2-like 1 Cdc2l1  
1418842\_at 0.86267 hematopoietic cell specific Lyn substrate 1 Hcls1  
1418843\_at 1.13983 "solute carrier family 30 (zinc transporter), member 4" Slc30a4  
1418844\_at 1.07198 "asparagine-linked glycosylation 9 homolog (yeast, alpha 1,2  
mannosyltransferase)" Alg9  
1418845\_at 0.83120 protein C Proc  
1418846\_at 0.98031 "adaptor-related protein complex AP-4, mu 1" Ap4m1  
1418847\_at 1.07608 arginase type II Arg2  
1418848\_at 1.03812 aquaporin 7 Aqp7  
1418849\_x\_at 1.00510 aquaporin 7 Aqp7  
1418850\_at 0.98238 enhancer of polycomb homolog 1 (Drosophila) Epc1

1418851\_at 1.13672 tripartite motif protein 39 Trim39  
1418852\_at 0.91336 "cholinergic receptor, nicotinic, alpha polypeptide 1 (muscle)" Chrna1  
1418853\_at 0.98792 apolipoprotein N Apon  
1418854\_at 0.92723 baculoviral IAP repeat-containing 2 Birc2  
1418855\_at 0.95565 RIKEN cDNA 1110008K04 gene 1110008K04Rik  
1418856\_a\_at 1.02473 "Fanconi anemia, complementation group A" Fanca  
1418857\_at 0.91555 "solute carrier family 13 (sodium-dependent dicarboxylate transporter), member 2" Slc13a2  
1418858\_at 0.98011 aldehyde oxidase 3 Aox3  
1418859\_at 0.98778 regulatory factor X-associated protein Rfxap  
1418860\_a\_at 0.79078 LETM1 domain containing 1 Letmd1  
1418861\_at 0.97603 protein inhibitor of activated STAT 4 Pias4  
1418862\_at 1.13049 enoyl Coenzyme A hydratase domain containing 3 Echdc3  
1418863\_at 1.16166 GATA binding protein 4 Gata4  
1418864\_at 0.91674 GATA binding protein 4 Gata4  
1418865\_at 0.87221 zinc finger protein 385 Zfp385  
1418866\_at 1.02067 "cytochrome P450, family 24, subfamily a, polypeptide 1" Cyp24a1  
1418867\_at 1.04698 "cytochrome P450, family 24, subfamily a, polypeptide 1" Cyp24a1  
1418868\_at 1.06090 engrailed 2 En2  
1418869\_a\_at 1.07133 pseudouridine synthase 1 Pus1  
1418870\_at 0.95011 RIKEN cDNA 4930579J09 gene 4930579J09Rik  
1418871\_a\_at 1.13215 RIKEN cDNA 1810007E14 gene 1810007E14Rik  
1418872\_at 1.11194 "ATP-binding cassette, sub-family B (MDR/TAP), member 1B" Abcb1b  
1418873\_at 0.75907 sideroflexin 4 Sfxn4  
1418874\_a\_at 1.07209 "proteasome (prosome, macropain) 26S subunit, non-ATPase, 4" Psmd4  
1418875\_at 0.87347 synaptogyrin 4 Syngr4  
1418876\_at 0.91783 forkhead box D1 Foxd1  
1418877\_at 1.32283 Forkhead box D1 Foxd1  
1418878\_at 0.86361 acrosomal vesicle protein 1 Acrv1  
1418879\_at 0.88201 RIKEN cDNA 9030611O19 gene 9030611O19Rik  
1418880\_at 0.92885 glial cell line derived neurotrophic factor family receptor alpha 3 Gfra3  
1418881\_at 0.94058 EF hand calcium binding protein 2 Efcbp2  
1418882\_at 0.97224 "NACHT, leucine rich repeat and PYD containing 5" Nalp5  
1418883\_a\_at 1.05070 "poly A binding protein, cytoplasmic 1" Pabpc1  
1418884\_x\_at 0.95630 "tubulin, alpha 1" Tuba1  
1418885\_a\_at 0.95041 isocitrate dehydrogenase 3 (NAD+) beta Idh3b  
1418886\_s\_at 1.01983 isocitrate dehydrogenase 3 (NAD+) beta Idh3b  
1418887\_a\_at 0.85258 "DNA segment, Chr 11, Wayne State University 99, expressed" D11Wsu99e  
1418888\_a\_at 1.03140 selenoprotein X 1 Sepx1  
1418889\_a\_at 1.00489 "casein kinase 1, delta" Csnk1d  
1418890\_a\_at 0.84535 "RAB3D, member RAS oncogene family" Rab3d  
1418891\_a\_at 0.74424 "RAB3D, member RAS oncogene family" Rab3d  
1418892\_at 1.00012 "ras homolog gene family, member J" Rhoj



1418893\_at 0.95079 pre B-cell leukemia transcription factor 2 Pbx2  
1418894\_s\_at 0.85984 pre B-cell leukemia transcription factor 2 Pbx2  
1418895\_at 1.03993 src family associated phosphoprotein 2 Scap2  
1418896\_a\_at 0.92452 ribophorin II Rpn2  
1418897\_at 0.87168 coagulation factor II F2  
1418898\_at 0.97312 lin-7 homolog C (C. elegans) Lin7c  
1418899\_at 0.96741 ubiquitin-fold modifier 1 Ufm1  
1418900\_at 0.98424 ubiquitin-fold modifier 1 Ufm1  
1418901\_at 0.94248 "CCAAT/enhancer binding protein (C/EBP), beta" Cebp  
1418902\_at 0.81513 RIKEN cDNA 3110023E09 gene 3110023E09Rik  
1418903\_at 1.02565 aquaporin 2 Aqp2  
1418904\_at 0.96842 --- ---  
1418905\_at 1.19826 nucleotide binding protein 1 Nubp1  
1418906\_at 1.06438 nucleotide binding protein 1 Nubp1  
1418907\_at 0.95915 --- ---  
1418908\_at 0.98772 peptidylglycine alpha-amidating monooxygenase Pam  
1418909\_at 1.07910 erythroblast membrane-associated protein Ermap  
1418910\_at 0.55126 bone morphogenetic protein 7 Bmp7  
1418911\_s\_at 1.39198 acyl-CoA synthetase long-chain family member 4 Acsl4  
1418912\_at 1.12600 plexin domain containing 2 Plxdc2  
1418913\_at 1.07797 betaine-homocysteine methyltransferase 2 Bhmt2  
1418914\_s\_at 1.04071 betaine-homocysteine methyltransferase 2 Bhmt2  
1418915\_at 1.07833 "methylmalonic aciduria cblC type, with homocystinuria" Mmachc  
1418916\_a\_at 1.06388 secreted phosphoprotein 2 Spp2  
1418917\_at 0.81112 heme binding protein 2 Hebp2  
1418918\_at 0.95028 insulin-like growth factor binding protein 1 Igfbp1  
1418919\_at 1.02278 shugoshin-like 1 (S. pombe) Sgol1  
1418920\_at 0.95143 claudin 15 Cldn15  
1418921\_at 0.94991 "immunoglobulin superfamily, member 4B" Igsf4b  
1418922\_at 1.08189 "immunoglobulin superfamily, member 4B" Igsf4b  
1418923\_at 0.93604 "solute carrier family 17 (sodium phosphate), member 3" Slc17a3  
1418924\_at 1.08197 Ras association (RalGDS/AF-6) domain family 7 Rassf7  
1418925\_at 0.75929 cadherin EGF LAG seven-pass G-type receptor 1 Celsr1  
1418926\_at 0.99248 zinc finger homeobox 1a Zfhx1a  
1418927\_a\_at 0.81273 similar to hyaluronic acid binding protein 4 LOC671769  
1418928\_a\_at 0.95272 RIKEN cDNA 2310038H17 gene 2310038H17Rik  
1418929\_at 0.93017 intraflagellar transport 57 homolog (Chlamydomonas) Ift57  
1418930\_at 1.52223 chemokine (C-X-C motif) ligand 10 Cxcl10  
1418931\_at 0.99484 "regenerating islet-derived family, member 4" Reg4  
1418932\_at 0.91585 "nuclear factor, interleukin 3, regulated" Nfil3  
1418933\_at 0.91280 "solute carrier family 1 (high affinity aspartate/glutamate transporter), member 6" Slc1a6  
1418934\_at 0.90801 mab-21-like 2 (C. elegans) Mab21l2

1418935\_at 0.90764 "transient receptor potential cation channel, subfamily M, member 1" Trpm1  
1418936\_at 1.26513 "v-maf musculoaponeurotic fibrosarcoma oncogene family, protein F (avian)" Maff  
1418937\_at 0.89076 "deiodinase, iodothyronine, type II" Dio2  
1418938\_at 0.97832 "deiodinase, iodothyronine, type II" Dio2  
1418939\_at 0.95279 H2.0-like homeo box 1 (Drosophila) Hlx1  
1418940\_at 0.97035 "sulfotransferase family 1B, member 1" Sult1b1  
1418941\_at 0.95242 protocadherin beta 22 Pcdhb22  
1418942\_at 1.00262 intraflagellar transport 74 homolog (Chlamydomonas) Ift74  
1418943\_at 0.85763 RIKEN cDNA B230120H23 gene B230120H23Rik  
1418944\_at 0.78195 cysteinyl leukotriene receptor 1 Cysltr1  
1418945\_at 1.01436 matrix metalloproteinase 3 Mmp3  
1418946\_at 1.05471 "ST3 beta-galactoside alpha-2,3-sialyltransferase 1" St3gal1  
1418947\_at 0.99395 NIMA (never in mitosis gene a)-related expressed kinase 3 Nek3  
1418948\_at 0.98403 "fascin homolog 3, actin-bundling protein, testicular (Strongylocentrotus purpuratus)" Fscn3  
1418949\_at 0.96307 growth differentiation factor 15 Gdf15  
1418950\_at 0.93500 dopamine receptor 2 Drd2  
1418951\_at 1.04343 taxilin beta Txlnb  
1418952\_at 0.89436 taxilin beta Txlnb  
1418953\_at 0.93130 F-box protein 16 Fbxo16  
1418954\_at 0.94649 "calcium/calmodulin-dependent protein kinase kinase 1, alpha" Camkk1  
1418955\_at 0.88855 zinc finger protein 93 Zfp93  
1418956\_at 1.18877 testis-specific serine kinase 6 Tssk6  
1418957\_at 0.87576 src homology three (SH3) and cysteine rich domain Stac  
1418958\_at 1.05718 acyl-malonyl condensing enzyme 1 Amac1  
1418959\_at 1.04620 "transmembrane protease, serine 5 (spinesin)" Tmprss5  
1418960\_at 1.07026 PHD finger protein 20-like 1 Phf20l1  
1418961\_at 0.95496 NECAP endocytosis associated 2 Necap2  
1418962\_at 0.98724 NECAP endocytosis associated 2 Necap2  
1418963\_at 0.90185 RIKEN cDNA 2310047O13 gene 2310047O13Rik  
1418964\_at 0.83289 "phosphatidylinositol glycan anchor biosynthesis, class M" Pigm  
1418965\_at 0.90095 nitric oxide synthase interacting protein Nosip  
1418966\_a\_at 0.98490 "discoidin, CUB and LCCL domain containing 1" Dcbl1  
1418967\_a\_at 0.99891 Suppression of tumorigenicity 7 St7  
1418968\_at 0.78661 RB1-inducible coiled-coil 1 Rb1cc1  
1418969\_at 1.06795 S-phase kinase-associated protein 2 (p45) Skp2  
1418970\_a\_at 1.08235 B-cell leukemia/lymphoma 10 Bcl10  
1418971\_x\_at 1.07027 B-cell leukemia/lymphoma 10 Bcl10  
1418972\_at 1.06461 B-cell leukemia/lymphoma 10 Bcl10  
1418973\_at 0.90587 basic leucine zipper nuclear factor 1 Blzf1  
1418974\_at 1.02781 basic leucine zipper nuclear factor 1 Blzf1  
1418975\_at 1.14385 NCK interacting protein with SH3 domain Nckipsd

1418976\_s\_at 0.84591 "cell death-inducing DNA fragmentation factor, alpha subunit-like effector B"  
Cideb

1418977\_at 0.90010 SAP30 binding protein Sap30bp

1418978\_at 0.88391 SAP30 binding protein /// similar to transcriptional regulator protein  
Sap30bp /// LOC639905

1418979\_at 0.59823 "aldo-keto reductase family 1, member C14" Akr1c14

1418980\_a\_at 0.80916 cyclic nucleotide phosphodiesterase 1 Cnp1

1418981\_at 1.04943 caspase 12 Casp12

1418982\_at 0.89686 "CCAAT/enhancer binding protein (C/EBP), alpha" Cebpa

1418983\_at 0.71909 InaD-like (Drosophila) Inadl

1418984\_at 0.81535 InaD-like (Drosophila) Inadl

1418985\_at 0.95469 CTTNBP2 N-terminal like Ctnnbp2nl

1418986\_a\_at 1.16387 ubiquitously expressed transcript Uxt

1418987\_at 1.03458 "phospholipase A2, group IID" Pla2g2d

1418988\_at 0.95731 peroxisome biogenesis factor 7 Pex7

1418989\_at 0.83527 cathepsin E Ctse

1418990\_at 1.04175 "membrane-spanning 4-domains, subfamily A, member 4D" Ms4a4d

1418991\_at 1.05571 BCL2-antagonist/killer 1 Bak1

1418992\_at 0.92912 coagulation factor X F10

1418993\_s\_at 0.92271 coagulation factor X F10

1418994\_at 1.00288 RIKEN cDNA 2410116G06 gene 2410116G06Rik

1418995\_at 1.01836 --- ---

1418996\_a\_at 0.94662 RIKEN cDNA 4930469P12 gene 4930469P12Rik

1418997\_at 1.00699 --- ---

1418998\_at 1.23911 kynurenine 3-monooxygenase (kynurenine 3-hydroxylase) Kmo

1418999\_at 1.03935 RIKEN cDNA 2310033P09 gene 2310033P09Rik

1419000\_at 0.88547 carboxypeptidase X 2 (M14 family) Cpxm2

1419001\_at 1.08183 bile acid-Coenzyme A: amino acid N-acyltransferase Baat

1419002\_s\_at 0.90832 bile acid-Coenzyme A: amino acid N-acyltransferase Baat

1419003\_at 1.07690 blood vessel epicardial substance Bves

1419004\_s\_at 0.97285 B-cell leukemia/lymphoma 2 related protein A1a /// B-cell leukemia/lymphoma  
2 related protein A1b /// B-cell leukemia/lymphoma 2 related protein A1d Bcl2a1a /// Bcl2a1b ///  
Bcl2a1d

1419005\_at 0.85921 "crystallin, beta B3" Crybb3

1419006\_s\_at 0.95529 pellino 2 Peli2

1419007\_at 0.97206 zona pellucida glycoprotein 3 Zp3

1419008\_at 1.04701 neuropeptide Y receptor Y5 Npy5r

1419009\_at 0.96975 actin-like 7a Actl7a

1419010\_x\_at 0.98769 kallikrein 1-related peptidase b5 Klk1b5

1419011\_at 1.03988 "crystallin, beta A2" Cryba2

1419012\_at 1.03922 "zinc finger protein, multitype 2" Zfpm2

1419013\_at 0.91009 G patch domain containing 1 Gpatc1

1419014\_at 0.92469 Rhesus blood group-associated A glycoprotein Rhag

1419015\_at 1.03716 WNT1 inducible signaling pathway protein 2 Wisp2  
1419016\_at 0.96332 RIKEN cDNA 1700034I23 gene 1700034I23Rik  
1419017\_at 0.92414 corin Corin  
1419018\_at 0.81666 reproductive homeobox 6 Rhox6  
1419019\_a\_at 0.93853 A kinase (PRKA) anchor protein 4 Akap4  
1419020\_at 0.99125 gastric intrinsic factor Gif  
1419021\_at 1.08524 mcf.2 transforming sequence Mcf2  
1419022\_a\_at 1.04822 "enolase 1, alpha non-neuron /// similar to enolase 1, alpha non-neuron /// similar to Alpha-enolase (2-phospho-D-glycerate hydro-lyase) (Non-neural enolase) (NNE) (Enolase 1)" Eno1 /// LOC433182 /// LOC672232  
1419023\_x\_at 1.05505 "enolase 1, alpha non-neuron" Eno1  
1419024\_at 1.07066 protein tyrosine phosphatase 4a1 Ptp4a1  
1419025\_at 1.14422 retinal S-antigen Sag  
1419026\_at 0.99254 Fas death domain-associated protein Daxx  
1419027\_s\_at 0.90154 glycolipid transfer protein Gltf  
1419028\_at 0.93715 "cyclic AMP-regulated phosphoprotein, 21" Arpp21  
1419029\_at 1.42131 ERO1-like (S. cerevisiae) Ero1l  
1419030\_at 1.29477 ERO1-like (S. cerevisiae) Ero1l  
1419031\_at 1.14331 fatty acid desaturase 2 Fads2  
1419032\_at 1.12372 RIKEN cDNA 2610018G03 gene 2610018G03Rik  
1419033\_at 0.95047 --- ---  
1419034\_at 1.08681 "casein kinase 2, alpha 1 polypeptide" Csnk2a1  
1419035\_s\_at 1.01851 "casein kinase 2, alpha 1 polypeptide" Csnk2a1  
1419036\_at 1.09983 "casein kinase 2, alpha 1 polypeptide" Csnk2a1  
1419037\_at 1.01032 "casein kinase 2, alpha 1 polypeptide" Csnk2a1  
1419038\_a\_at 1.21260 "casein kinase 2, alpha 1 polypeptide" Csnk2a1  
1419039\_at 0.98611 "cytochrome P450, family 2, subfamily d, polypeptide 22" Cyp2d22  
1419040\_at 0.95565 "cytochrome P450, family 2, subfamily d, polypeptide 22" Cyp2d22  
1419041\_at 0.85546 integrin alpha FG-GAP repeat containing 1 Itfg1  
1419042\_at 0.99876 interferon inducible GTPase 1 Iigp1  
1419043\_a\_at 1.33152 interferon inducible GTPase 1 Iigp1  
1419044\_at 1.16250 contactin associated protein 4 Cntnap4  
1419045\_at 0.68900 "solute carrier family 25 (mitochondrial carrier; phosphate carrier), member 23" Slc25a23  
1419046\_at 1.21353 brain protein 16 Brp16  
1419047\_at 0.93269 pecanex homolog (Drosophila) Pcnx  
1419048\_at 0.98747 pecanex homolog (Drosophila) Pcnx  
1419049\_at 0.78875 pecanex homolog (Drosophila) Pcnx  
1419050\_at 1.16248 RIKEN cDNA 1110002H13 gene 1110002H13Rik  
1419051\_at 0.98045 OVO homolog-like 1 (Drosophila) Ovol1  
1419052\_at 0.96487 OVO homolog-like 1 (Drosophila) Ovol1  
1419053\_at 0.85596 peroxisomal biogenesis factor 14 Pex14  
1419054\_a\_at 1.00605 "protein tyrosine phosphatase, non-receptor type 21" Ptpn21

1419055\_a\_at 1.00760 "protein tyrosine phosphatase, non-receptor type 21" Ptpn21  
1419056\_at 0.79722 reticulon 2 (Z-band associated protein) Rtn2  
1419057\_at 0.79970 "solute carrier family 5 (sodium/glucose cotransporter), member 1" Slc5a1  
1419058\_at 1.17693 polymerase (RNA) I polypeptide E Polr1e  
1419059\_at 0.99560 serum amyloid P-component Apcs  
1419060\_at 0.95991 granzyme B Gzmb  
1419061\_at 0.95240 "ras homolog gene family, member D" Rhod  
1419062\_at 1.01865 erythrocyte protein band 4.1-like 3 Epb4.113  
1419063\_at 0.99185 UDP galactosyltransferase 8A Ugt8a  
1419064\_a\_at 0.95602 UDP galactosyltransferase 8A Ugt8a  
1419065\_at 1.03800 RIKEN cDNA 5730521E12 gene 5730521E12Rik  
1419066\_at 0.79341 immediate early response 5-like Ier5l  
1419067\_a\_at 1.03619 RAB guanine nucleotide exchange factor (GEF) 1 Rabgef1  
1419068\_at 0.98572 RAB guanine nucleotide exchange factor (GEF) 1 Rabgef1  
1419069\_at 0.91064 RAB guanine nucleotide exchange factor (GEF) 1 Rabgef1  
1419070\_at 0.74643 cystin 1 Cys1  
1419071\_at 0.78803 cystin 1 Cys1  
1419072\_at 0.90784 "glutathione S-transferase, mu 7" Gstm7  
1419073\_at 0.83240 transmembrane protein with EGF-like and two follistatin-like domains 2 Tmeff2  
1419074\_at 1.17020 RIKEN cDNA 2510006C20 gene 2510006C20Rik  
1419075\_s\_at 0.82192 serum amyloid A 1 Saal  
1419076\_a\_at 0.96171 breast cancer 2 Brca2  
1419077\_at 0.92046 "membrane protein, palmitoylated 3 (MAGUK p55 subfamily member 3)"  
Mpp3  
1419078\_at 1.01784 ninein Nin  
1419079\_at 0.95398 "sodium channel, nonvoltage-gated 1 gamma" Scnn1g  
1419080\_at 0.99556 glial cell line derived neurotrophic factor Gdnf  
1419081\_at 0.79003 autophagy-related 10 (yeast) Atg10  
1419082\_at 1.10410 "serine (or cysteine) peptidase inhibitor, clade B, member 2" Serpinb2  
1419083\_at 0.97366 "tumor necrosis factor (ligand) superfamily, member 11" Tnfsf11  
1419084\_a\_at 1.11578 Purkinje cell protein 2 (L7) Pcp2  
1419085\_at 1.00011 Purkinje cell protein 2 (L7) Pcp2  
1419086\_at 1.43209 fibroblast growth factor binding protein 1 Fgfbp1  
1419087\_s\_at 0.85496 "splicing factor 3a, subunit 1" Sf3a1  
1419088\_at 0.70944 tissue inhibitor of metalloproteinase 3 Timp3  
1419089\_at 0.71220 tissue inhibitor of metalloproteinase 3 Timp3  
1419090\_x\_at 1.01104 kallikrein 1-related peptidase b26 Klk1b26  
1419091\_a\_at 0.98555 annexin A2 Anxa2  
1419092\_a\_at 0.98005 STE20-like kinase (yeast) Slk  
1419093\_at 0.95167 "tryptophan 2,3-dioxygenase" Tdo2  
1419094\_at 0.99160 "cytochrome P450, family 2, subfamily c, polypeptide 37 /// cytochrome P450,  
family 2, subfamily c, polypeptide 50 /// cytochrome P450 /// similar to cytochrome P450"  
Cyp2c37 /// Cyp2c50 /// Cyp2c54 /// LOC639023

|              |         |                                                                    |               |
|--------------|---------|--------------------------------------------------------------------|---------------|
| 1419095_a_at | 1.35646 | apolipoprotein M                                                   | Apom          |
| 1419096_at   | 0.93473 | apolipoprotein M                                                   | Apom          |
| 1419097_a_at | 1.01558 | stomatin                                                           | Stom          |
| 1419098_at   | 0.88803 | stomatin                                                           | Stom          |
| 1419099_x_at | 0.88576 | stomatin                                                           | Stom          |
| 1419100_at   | 0.99816 | "serine (or cysteine) peptidase inhibitor, clade A, member 3N"     | Serpina3n     |
| 1419101_at   | 1.09174 | "transcriptional regulator, SIN3A (yeast)"                         | Sin3a         |
| 1419102_at   | 1.09082 | "transcriptional regulator, SIN3A (yeast)"                         | Sin3a         |
| 1419103_a_at | 0.97709 | abhydrolase domain containing 6                                    | Abhd6         |
| 1419104_at   | 0.91965 | abhydrolase domain containing 6                                    | Abhd6         |
| 1419105_at   | 0.92538 | "nuclear receptor subfamily 1, group H, member 4"                  | Nr1h4         |
| 1419106_at   | 1.07434 | RIKEN cDNA 2210409E12 gene                                         | 2210409E12Rik |
| 1419107_at   | 0.89657 | oligophrenin 1                                                     | Ophn1         |
| 1419108_at   | 0.95640 | oligophrenin 1                                                     | Ophn1         |
| 1419109_at   | 0.91481 | histidine rich calcium binding protein                             | Hrc           |
| 1419110_at   | 0.89480 | RIO kinase 1 (yeast)                                               | Riok1         |
| 1419111_at   | 0.98956 | "inhibitor of growth family, member 2"                             | Ing2          |
| 1419112_at   | 1.09895 | nemo like kinase                                                   | Nlk           |
| 1419113_at   | 1.11376 | "adaptor protein complex AP-1, gamma 2 subunit"                    | Ap1g2         |
| 1419114_at   | 0.93253 | asparagine-linked glycosylation 14 homolog (yeast)                 | Alg14         |
| 1419115_at   | 0.92094 | asparagine-linked glycosylation 14 homolog (yeast)                 | Alg14         |
| 1419116_at   | 1.02890 | asparagine-linked glycosylation 14 homolog (yeast)                 | Alg14         |
| 1419117_at   | 0.85807 | "solute carrier family 22 (organic cation transporter), member 2"  | Slc22a2       |
| 1419118_at   | 1.00072 | RIKEN cDNA 2900093B09 gene                                         | 2900093B09Rik |
| 1419119_at   | 1.00663 | hematopoietic cell signal transducer                               | Hcst          |
| 1419120_at   | 1.00102 | lymphoblastomic leukemia                                           | Lyl1          |
| 1419121_at   | 0.99752 | thiopurine methyltransferase                                       | Tpmt          |
| 1419122_at   | 1.15383 | methyltransferase-like 1                                           | Mettl1        |
| 1419123_a_at | 0.67458 | "platelet-derived growth factor, C polypeptide"                    | Pdgfc         |
| 1419124_at   | 0.82950 | RIKEN cDNA 2210010L05 gene                                         | 2210010L05Rik |
| 1419125_at   | 0.86618 | "protein tyrosine phosphatase, non-receptor type 18"               | Ptpn18        |
| 1419126_at   | 1.03048 | homeo box D9                                                       | Hoxd9         |
| 1419127_at   | 0.91487 | neuropeptide Y                                                     | Npy           |
| 1419128_at   | 0.90957 | integrin alpha X                                                   | Itgax         |
| 1419129_at   | 0.93923 | "solute carrier family 22 (organic cation transporter), member 13" | Slc22a13      |
| 1419130_at   | 1.21864 | deaminase domain containing 1                                      | Deadc1        |
| 1419131_at   | 1.10993 | "coagulation factor XIII, beta subunit"                            | F13b          |
| 1419132_at   | 1.16331 | toll-like receptor 2                                               | Tlr2          |
| 1419133_at   | 0.87650 | Envoplakin                                                         | Evpl          |
| 1419134_at   | 1.00965 | Rhesus blood group-associated B glycoprotein                       | Rhbg          |
| 1419135_at   | 1.06824 | lymphotoxin B                                                      | Ltb           |
| 1419136_at   | 0.95527 | "aldo-keto reductase family 1, member C18"                         | Akr1c18       |
| 1419137_at   | 0.92936 | SH3/ankyrin domain gene 3                                          | Shank3        |

1419138\_at 0.94782 "UDP-Gal:betaGalNAc beta 1,3-galactosyltransferase, polypeptide 4"  
 B3galt4  
 1419139\_at 0.96583 growth differentiation factor 5 Gdf5  
 1419140\_at 1.01460 activin receptor IIB Acvr2b  
 1419141\_at 0.96686 "crystallin, gamma D" Crygd  
 1419142\_at 0.97966 cathepsin R Ctsr  
 1419143\_at 0.86345 cysteine-rich perinuclear theca 5 Cyp5  
 1419144\_at 0.93907 CD163 antigen Cd163  
 1419145\_at 0.90867 smoothelin-like 1 Smtnl1  
 1419146\_a\_at 0.95925 glucokinase Gck  
 1419147\_at 1.00120 REC8-like 1 (yeast) Rec8L1  
 1419148\_at 0.90209 advillin Avil  
 1419149\_at 1.23910 "serine (or cysteine) peptidase inhibitor, clade E, member 1" Serpine1  
 1419150\_at 1.03097 myogenic factor 6 Myf6  
 1419151\_at 1.04694 RIKEN cDNA 4930449I24 gene 4930449I24Rik  
 1419152\_at 1.12060 RIKEN cDNA 2810417H13 gene 2810417H13Rik  
 1419153\_at 1.10126 RIKEN cDNA 2810417H13 gene 2810417H13Rik  
 1419154\_at 0.88767 "transmembrane protease, serine 2" Tmprs2  
 1419155\_a\_at 0.73414 SRY-box containing gene 4 /// similar to Transcription factor SOX-4  
 Sox4 /// LOC672274  
 1419156\_at 0.67671 SRY-box containing gene 4 /// similar to Transcription factor SOX-4 Sox4 ///  
 LOC672274  
 1419157\_at 0.69594 SRY-box containing gene 4 /// similar to Transcription factor SOX-4 Sox4 ///  
 LOC672274  
 1419158\_a\_at 1.00165 histidyl-tRNA synthetase-like Harsl  
 1419159\_at 0.91581 "golgi autoantigen, golgin subfamily a, 3" Golga3  
 1419160\_at 0.81354 "golgi autoantigen, golgin subfamily a, 3" Golga3  
 1419161\_a\_at 0.99265 NADPH oxidase 4 Nox4  
 1419162\_s\_at 0.85702 "DnaJ (Hsp40) homolog, subfamily C, member 3" Dnajc3  
 1419163\_s\_at 0.86276 "DnaJ (Hsp40) homolog, subfamily C, member 3" Dnajc3  
 1419164\_at 0.86178 zinc finger protein 260 Zfp260  
 1419165\_at 0.89636 zinc finger protein 260 /// similar to Zinc finger protein OZF (Zinc finger  
 protein 260) (Zfp-260) Zfp260 /// LOC635007  
 1419166\_at 1.02782 "solute carrier family 5 (sodium/glucose cotransporter), member 2" Slc5a2  
 1419167\_at 0.92795 proline-rich acidic protein 1 Prap1  
 1419168\_at 1.13062 mitogen-activated protein kinase 6 Mapk6  
 1419169\_at 1.07750 mitogen-activated protein kinase 6 Mapk6  
 1419170\_at 0.88536 transmembrane protein 157 Tmem157  
 1419171\_at 0.95809 transmembrane protein 157 Tmem157  
 1419172\_at 0.89032 dihydrofolate reductase Dhfr  
 1419173\_at 1.10320 aminoacylase 1 Acyl1  
 1419174\_at 0.94032 RIKEN cDNA 2410004B18 gene 2410004B18Rik  
 1419175\_a\_at 1.00915 "butyrophilin, subfamily 1, member A1" Btn1a1

|              |         |                                                                                             |               |
|--------------|---------|---------------------------------------------------------------------------------------------|---------------|
| 1419176_at   | 1.04650 | vacuolar protein sorting 37A (yeast)                                                        | Vps37a        |
| 1419177_at   | 1.01738 | vacuolar protein sorting 37A (yeast)                                                        | Vps37a        |
| 1419178_at   | 1.04032 | "CD3 antigen, gamma polypeptide"                                                            | Cd3g          |
| 1419179_at   | 0.94374 | thioredoxin-like 4                                                                          | Txn14         |
| 1419180_at   | 1.03249 | B-cell CLL/lymphoma 9-like                                                                  | Bcl9l         |
| 1419181_at   | 0.98125 | zinc finger protein 326                                                                     | Zfp326        |
| 1419182_at   | 0.98126 | "sushi, von Willebrand factor type A, EGF and pentraxin domain containing 1"                | Svep1         |
| 1419183_at   | 1.10091 | PAP associated domain containing 4                                                          | Papd4         |
| 1419184_a_at | 0.95078 | four and a half LIM domains 2                                                               | Fhl2          |
| 1419185_a_at | 1.05445 | MLX interacting protein-like                                                                | Mlxip1        |
| 1419186_a_at | 0.89322 | "ST8 alpha-N-acetyl-neuraminide alpha-2,8-sialyltransferase 4"                              | St8sia4       |
| 1419187_at   | 1.01151 | RIKEN cDNA 1700012L04 gene /// similar to Histone H2A.x (H2a/x) 1700012L04Rik /// LOC547154 |               |
| 1419188_s_at | 1.05556 | chemokine (C-C motif) ligand 27                                                             | Ccl27         |
| 1419189_at   | 0.99206 | vesicle transport through interaction with t-SNAREs homolog 1A (yeast)                      | Vti1a         |
| 1419190_at   | 1.03105 | vesicle transport through interaction with t-SNAREs homolog 1A (yeast)                      | Vti1a         |
| 1419191_at   | 0.83959 | homeodomain interacting protein kinase 3                                                    | Hipk3         |
| 1419192_at   | 0.80923 | interleukin 4 induced 1                                                                     | Il4i1         |
| 1419193_a_at | 0.94602 | "glia maturation factor, gamma"                                                             | Gmfg          |
| 1419194_s_at | 0.93090 | "glia maturation factor, gamma"                                                             | Gmfg          |
| 1419195_at   | 0.95916 | WAP four-disulfide core domain 15                                                           | Wfdc15        |
| 1419196_at   | 1.02622 | hepcidin antimicrobial peptide 1                                                            | Hamp1         |
| 1419197_x_at | 0.96159 | hepcidin antimicrobial peptide 1                                                            | Hamp1         |
| 1419198_at   | 0.93988 | chromobox homolog 8 (Drosophila Pc class)                                                   | Cbx8          |
| 1419199_at   | 1.00834 | chromobox homolog 8 (Drosophila Pc class)                                                   | Cbx8          |
| 1419200_at   | 0.94827 | FXDY domain-containing ion transport regulator 7                                            | Fxyd7         |
| 1419201_at   | 0.91752 | kallikrein 11                                                                               | Klk11         |
| 1419202_at   | 1.13524 | cystatin F (leukocystatin)                                                                  | Cst7          |
| 1419203_at   | 1.08939 | gene trap locus F3a                                                                         | Gtlf3a        |
| 1419204_at   | 1.02319 | delta-like 1 (Drosophila)                                                                   | Dll1          |
| 1419205_x_at | 1.37464 | G patch domain containing 4                                                                 | Gpatc4        |
| 1419206_at   | 1.03249 | CD37 antigen                                                                                | Cd37          |
| 1419207_at   | 0.95166 | zinc finger protein 37                                                                      | Zfp37         |
| 1419208_at   | 0.89182 | mitogen activated protein kinase kinase kinase 8                                            | Map3k8        |
| 1419209_at   | 8.15299 | chemokine (C-X-C motif) ligand 1                                                            | Cxcl1         |
| 1419210_at   | 1.17361 | histamine receptor H 1                                                                      | Hrh1          |
| 1419211_s_at | 0.95587 | RIKEN cDNA 4933424B01 gene                                                                  | 4933424B01Rik |
| 1419212_at   | 1.31876 | icos ligand                                                                                 | Icosl         |
| 1419213_at   | 1.02725 | N-acetyltransferase 6                                                                       | Nat6          |
| 1419214_at   | 0.87803 | "tumor necrosis factor receptor superfamily, member 11a"                                    | Tnfrsf11a     |
| 1419215_at   | 0.84548 | aldehyde oxidase 4                                                                          | Aox4          |
| 1419216_at   | 0.87884 | 5-azacytidine induced gene 1                                                                | Azil          |



1419217\_at 0.91293 secretion regulating guanine nucleotide exchange factor Sergef  
 1419218\_at 0.84564 "vang-like 2 (van gogh, Drosophila)" Vangl2  
 1419219\_at 0.98207 "cytochrome P450, family 4, subfamily f, polypeptide 18" Cyp4f18  
 1419220\_at 0.89822 cardiomyopathy associated 1 Cmya1  
 1419221\_a\_at 1.01031 regulator of G-protein signaling 14 Rgs14  
 1419222\_at 0.87057 thromboxane A2 receptor Tbx2r  
 1419223\_a\_at 0.97651 dystrobrevin alpha Dtna  
 1419224\_at 1.00542 "cat eye syndrome chromosome region, candidate 6 homolog (human)"  
 Cacr6  
 1419225\_at 1.10957 "calcium channel, voltage-dependent, alpha2/delta subunit 3" Cacna2d3  
 1419226\_at 0.93691 CD96 antigen Cd96  
 1419227\_at 1.07890 chaperonin subunit 6b (zeta) Cct6b  
 1419228\_at 1.07241 elacC homolog 1 (E. coli) Elac1  
 1419229\_at 0.96586 reproductive homeobox 4B /// reproductive homeobox 4E /// reproductive  
 homeobox 4C /// reproductive homeobox 4H /// reproductive homeobox 4G /// reproductive homeobox  
 4A /// reproductive homeobox 4D /// similar to reproductive homeobox 4E Rhox4b /// Rhox4e ///  
 Rhox4c /// Rhox4h /// Rhox4g /// Rhox4a /// Rhox4d /// LOC665169  
 1419230\_at 1.05130 keratin 12 Krt12  
 1419231\_s\_at 1.03808 keratin 12 Krt12  
 1419232\_a\_at 0.96795 apolipoprotein A-I Apo1  
 1419233\_x\_at 0.98021 apolipoprotein A-I Apo1  
 1419234\_at 1.18537 helicase (DNA) B Helb  
 1419235\_s\_at 1.03971 helicase (DNA) B Helb  
 1419236\_at 1.05868 helicase (DNA) B Helb  
 1419237\_at 1.02358 ubiquitin specific peptidase 29 Usp29  
 1419238\_at 1.01950 "ATP-binding cassette, sub-family A (ABC1), member 7" Abca7  
 1419239\_at 0.95234 zinc finger protein 54 Zfp54  
 1419240\_at 0.98965 testis expressed gene 14 Tex14  
 1419241\_a\_at 1.07161 autoimmune regulator (autoimmune polyendocrinopathy candidiasis  
 ectodermal dystrophy) Aire  
 1419242\_at 0.94788 RIKEN cDNA 9530002B09 gene 9530002B09Rik  
 1419243\_at 0.97859 "RAB14, member RAS oncogene family" Rab14  
 1419244\_a\_at 0.94482 "RAB14, member RAS oncogene family" Rab14  
 1419245\_at 0.75875 "RAB14, member RAS oncogene family" Rab14  
 1419246\_s\_at 0.94471 "RAB14, member RAS oncogene family" Rab14  
 1419247\_at 0.80963 regulator of G-protein signaling 2 Rgs2  
 1419248\_at 0.84777 regulator of G-protein signaling 2 Rgs2  
 1419249\_at 0.85239 PFTAIRES protein kinase 1 Pftk1  
 1419250\_a\_at 0.81681 PFTAIRES protein kinase 1 Pftk1  
 1419251\_at 1.07202 epidermal growth factor receptor pathway substrate 15 Eps15  
 1419252\_at 0.99614 --- ---  
 1419253\_at 0.97224 "methylenetetrahydrofolate dehydrogenase (NAD+ dependent),  
 methenyltetrahydrofolate cyclohydrolase" Mthfd2

|              |         |                                                                                                     |               |         |
|--------------|---------|-----------------------------------------------------------------------------------------------------|---------------|---------|
| 1419254_at   | 1.06571 | "methylenetetrahydrofolate dehydrogenase (NAD+ dependent), methenyltetrahydrofolate cyclohydrolase" | Mthfd2        |         |
| 1419255_at   | 1.51739 | spectrin beta 2                                                                                     | Spnb2         |         |
| 1419256_at   | 0.99570 | spectrin beta 2                                                                                     | Spnb2         |         |
| 1419257_at   | 1.15257 | transcription elongation factor A (SII) 1                                                           | Tcea1         |         |
| 1419258_at   | 1.11832 | transcription elongation factor A (SII) 1                                                           | Tcea1         |         |
| 1419259_at   | 0.87142 | Ras suppressor protein 1                                                                            | Rsu1          |         |
| 1419260_a_at | 1.13606 | small nuclear ribonucleoprotein B                                                                   | Snrpb         |         |
| 1419261_at   | 0.94400 | "acyl-Coenzyme A dehydrogenase family, member 8"                                                    |               | Acad8   |
| 1419262_at   | 0.95356 | "acyl-Coenzyme A dehydrogenase family, member 8"                                                    |               | Acad8   |
| 1419263_a_at | 1.03983 | adhesion regulating molecule 1                                                                      | Adrm1         |         |
| 1419264_at   | 1.02117 | RIKEN cDNA 1200014M14 gene                                                                          | 1200014M14Rik |         |
| 1419265_at   | 0.95489 | RIKEN cDNA 1200014M14 gene                                                                          | 1200014M14Rik |         |
| 1419266_at   | 1.03593 | nuclear transcription factor-Y beta                                                                 | Nfyb          |         |
| 1419267_at   | 0.94393 | nuclear transcription factor-Y beta                                                                 | Nfyb          |         |
| 1419268_at   | 1.02572 | anterior gradient 2 (Xenopus laevis)                                                                | Agr2          |         |
| 1419269_at   | 0.75474 | deoxyuridine triphosphatase                                                                         | Dut           |         |
| 1419270_a_at | 1.00582 | deoxyuridine triphosphatase                                                                         | Dut           |         |
| 1419271_at   | 1.15105 | paired box gene 6                                                                                   | Pax6          |         |
| 1419272_at   | 1.02065 | myeloid differentiation primary response gene 88                                                    |               | Myd88   |
| 1419273_at   | 1.07734 | expressed sequence C80913                                                                           | C80913        |         |
| 1419274_at   | 1.10736 | expressed sequence C80913                                                                           | C80913        |         |
| 1419275_at   | 1.04350 | DAZ associated protein 1                                                                            | Dazap1        |         |
| 1419276_at   | 0.68422 | ectonucleotide pyrophosphatase/phosphodiesterase 1                                                  | Enpp1         |         |
| 1419277_at   | 0.96914 | ubiquitin specific peptidase 48                                                                     | Usp48         |         |
| 1419278_at   | 0.97995 | ubiquitin specific peptidase 48                                                                     | Usp48         |         |
| 1419279_at   | 0.69683 | "phosphatidylinositol-4-phosphate 5-kinase, type II, alpha"                                         |               | Pip5k2a |
| 1419280_at   | 0.59692 | "phosphatidylinositol-4-phosphate 5-kinase, type II, alpha"                                         |               | Pip5k2a |
| 1419281_a_at | 1.08361 | zinc finger protein 259                                                                             | Zfp259        |         |
| 1419282_at   | 0.98257 | chemokine (C-C motif) ligand 12                                                                     | Ccl12         |         |
| 1419283_s_at | 0.81207 | tensin 1                                                                                            | Tns1          |         |
| 1419284_at   | 0.97868 | cysteine and histidine rich 1                                                                       | Cyhr1         |         |
| 1419285_s_at | 0.96105 | cysteine and histidine rich 1                                                                       | Cyhr1         |         |
| 1419286_s_at | 0.92441 | intraflagellar transport 81 homolog (Chlamydomonas)                                                 | Ift81         |         |
| 1419287_at   | 0.96733 | HSPC171 protein                                                                                     | Hspc171       |         |
| 1419288_at   | 0.99582 | junction adhesion molecule 2                                                                        | Jam2          |         |
| 1419289_a_at | 0.91733 | synaptogyrin 1                                                                                      | Syngr1        |         |
| 1419290_at   | 1.10972 | methyltransferase like 6                                                                            | Mettl6        |         |
| 1419291_x_at | 1.14625 | growth arrest specific 5                                                                            | Gas5          |         |
| 1419292_at   | 0.81119 | HtrA serine peptidase 3                                                                             | Htra3         |         |
| 1419293_at   | 0.91228 | Down syndrome cell adhesion molecule                                                                | Dscam         |         |
| 1419294_at   | 1.06061 | RIKEN cDNA 1700011H14 gene                                                                          | 1700011H14Rik |         |
| 1419295_at   | 0.98525 | cAMP responsive element binding protein 3-like 1                                                    |               | Creb3l1 |

|              |         |                                                                                                                                                                                                                                                              |               |  |
|--------------|---------|--------------------------------------------------------------------------------------------------------------------------------------------------------------------------------------------------------------------------------------------------------------|---------------|--|
| 1419296_at   | 0.95669 | Rho GTPase activating protein 4                                                                                                                                                                                                                              | Arhgap4       |  |
| 1419297_at   | 1.02710 | "histocompatibility 2, O region alpha locus"                                                                                                                                                                                                                 | H2-Oa         |  |
| 1419298_at   | 0.84226 | paraoxonase 3                                                                                                                                                                                                                                                | Pon3          |  |
| 1419299_at   | 0.96153 | RIKEN cDNA 2010012O05 gene                                                                                                                                                                                                                                   | 2010012O05Rik |  |
| 1419300_at   | 0.94367 | FMS-like tyrosine kinase 1                                                                                                                                                                                                                                   | Flt1          |  |
| 1419301_at   | 0.71424 | frizzled homolog 4 (Drosophila)                                                                                                                                                                                                                              | Fzd4          |  |
| 1419302_at   | 1.05882 | hairy/enhancer-of-split related with YRPW motif-like                                                                                                                                                                                                         | Heyl          |  |
| 1419303_at   | 1.02284 | hairy/enhancer-of-split related with YRPW motif-like                                                                                                                                                                                                         | Heyl          |  |
| 1419304_at   | 0.98754 | brachyury                                                                                                                                                                                                                                                    | T             |  |
| 1419305_a_at | 0.96483 | F-box only protein 36                                                                                                                                                                                                                                        | Fbxo36        |  |
| 1419306_at   | 0.74834 | coiled-coil domain containing 96                                                                                                                                                                                                                             | Ccdc96        |  |
| 1419307_at   | 0.89380 | "tumor necrosis factor receptor superfamily, member 13c"                                                                                                                                                                                                     | Tnfrsf13c     |  |
| 1419308_at   | 0.89860 | inversin                                                                                                                                                                                                                                                     | Invs          |  |
| 1419309_at   | 1.14401 | podoplanin                                                                                                                                                                                                                                                   | Pdpn          |  |
| 1419310_s_at | 0.89542 | regulatory factor X-associated ankyrin-containing protein                                                                                                                                                                                                    | Rfxank        |  |
| 1419311_at   | 1.12936 | tripartite motif protein 10                                                                                                                                                                                                                                  | Trim10        |  |
| 1419312_at   | 0.98042 | "ATPase, Ca <sup>++</sup> transporting, cardiac muscle, fast twitch 1"                                                                                                                                                                                       | Atp2a1        |  |
| 1419313_at   | 1.05082 | cyclin T1                                                                                                                                                                                                                                                    | Ccnt1         |  |
| 1419314_at   | 0.49222 | tubulointerstitial nephritis antigen                                                                                                                                                                                                                         | Tinag         |  |
| 1419315_at   | 0.94486 | SLAM family member 9                                                                                                                                                                                                                                         | Slamf9        |  |
| 1419316_s_at | 1.00569 | "guanine nucleotide binding protein (G protein), beta polypeptide 1-like"                                                                                                                                                                                    | Gnb1l         |  |
| 1419317_x_at | 0.87717 | RIKEN cDNA 2310002A05 gene /// small proline rich-like 1 /// similar to late cornified envelope protein /// hypothetical protein LOC630971 /// similar to late cornified envelope protein 2310002A05Rik /// Sprr11 /// LOC545548 /// LOC630971 /// LOC630994 |               |  |
| 1419318_at   | 0.91067 | serum amyloid A 4                                                                                                                                                                                                                                            | Saa4          |  |
| 1419319_at   | 0.89212 | serum amyloid A 4                                                                                                                                                                                                                                            | Saa4          |  |
| 1419320_at   | 1.01245 | carbohydrate (N-acetylglucosamine 6-O) sulfotransferase 5                                                                                                                                                                                                    | Chst5         |  |
| 1419321_at   | 0.93464 | coagulation factor VII                                                                                                                                                                                                                                       | F7            |  |
| 1419322_at   | 0.94418 | "FYVE, RhoGEF and PH domain containing 6"                                                                                                                                                                                                                    | Fgd6          |  |
| 1419323_at   | 1.01893 | "peptidyl arginine deiminase, type I"                                                                                                                                                                                                                        | Padi1         |  |
| 1419324_at   | 0.85071 | LIM homeobox protein 9                                                                                                                                                                                                                                       | Lhx9          |  |
| 1419325_at   | 0.87045 | neuromedin U                                                                                                                                                                                                                                                 | Nmu           |  |
| 1419326_at   | 1.01137 | RIKEN cDNA 1700028P14 gene                                                                                                                                                                                                                                   | 1700028P14Rik |  |
| 1419327_at   | 0.92381 | RIKEN cDNA 2210010A19 gene                                                                                                                                                                                                                                   | 2210010A19Rik |  |
| 1419328_at   | 0.88148 | "sema domain, immunoglobulin domain (Ig), TM domain, and short cytoplasmic domain"                                                                                                                                                                           | Sema4f        |  |
| 1419329_at   | 0.94298 | sorbin and SH3 domain containing 3                                                                                                                                                                                                                           | Sorbs3        |  |
| 1419330_a_at | 1.04660 | glycoprotein A33 (transmembrane)                                                                                                                                                                                                                             | Gpa33         |  |
| 1419331_at   | 0.95173 | cadherin 17                                                                                                                                                                                                                                                  | Cdh17         |  |
| 1419332_at   | 0.99322 | "EGF-like-domain, multiple 6"                                                                                                                                                                                                                                | Egfl6         |  |
| 1419333_at   | 1.03092 | RIKEN cDNA 1110008J03 gene                                                                                                                                                                                                                                   | 1110008J03Rik |  |
| 1419334_at   | 1.02714 | cytotoxic T-lymphocyte-associated protein 4                                                                                                                                                                                                                  | Ctla4         |  |

1419335\_at 0.93717 RIKEN cDNA 4930441O14 gene 4930441O14Rik  
1419336\_at 0.92747 lipocalin 5 Lcn5  
1419337\_at 0.92613 RIKEN cDNA 1700080E11 gene 1700080E11Rik  
1419338\_at 0.91878 ICRFP703B1614Q5.5 gene ICRFP703B1614Q5.5  
1419339\_at 0.93565 neuraminidase 3 Neu3  
1419340\_at 1.11028 Moloney leukemia virus 10-like 1 Mov10l1  
1419341\_at 0.99832 Eph receptor A8 EphA8  
1419342\_at 0.94194 translocating chain-associating membrane protein 2 Tram2  
1419343\_at 1.09628 "solute carrier family 15 (oligopeptide transporter), member 1" Slc15a1  
1419344\_at 1.12792 t-complex-associated testis expressed 1 Tcte1  
1419345\_at 1.09527 parathyroid hormone Pth  
1419346\_a\_at 0.99136 seminal vesicle secretion 5 Svs5  
1419347\_x\_at 0.96614 seminal vesicle secretion 5 Svs5  
1419348\_at 0.95012 parotid secretory protein Psp  
1419349\_a\_at 0.87250 "cytochrome P450, family 2, subfamily d, polypeptide 9" Cyp2d9  
1419350\_at 1.11085 hook homolog 2 (Drosophila) Hook2  
1419351\_a\_at 1.10329 RIKEN cDNA 0610007P06 gene 0610007P06Rik  
1419352\_at 1.09866 RIKEN cDNA 0610007P06 gene 0610007P06Rik  
1419353\_at 0.93706 dolichol-phosphate (beta-D) mannosyltransferase 1 Dpm1  
1419354\_at 0.83277 Kruppel-like factor 7 (ubiquitous) Klf7  
1419355\_at 0.96870 Kruppel-like factor 7 (ubiquitous) Klf7  
1419356\_at 0.90601 Kruppel-like factor 7 (ubiquitous) Klf7  
1419357\_at 1.04757 RIKEN cDNA 5830446M03 gene 5830446M03Rik  
1419358\_at 0.76647 sortilin-related VPS10 domain containing receptor 2 Sorcs2  
1419359\_at 1.02117 hexamethylene bis-acetamide inducible 1 Hexim1  
1419360\_a\_at 0.91339 "synovial sarcoma translocation, Chromosome 18" Ss18  
1419361\_at 0.94448 "synovial sarcoma translocation, Chromosome 18" Ss18  
1419362\_at 0.92989 mitochondrial ribosomal protein L35 Mrpl35  
1419363\_a\_at 1.07807 mitochondrial ribosomal protein L35 Mrpl35  
1419364\_a\_at 1.00764 ribosomal protein S7 /// similar to 40S ribosomal protein S7 (S8) /// similar to  
40S ribosomal protein S7 (S8) /// similar to 40S ribosomal protein S7 (S8) /// similar to 40S ribosomal  
protein S7 (S8) Rps7 /// LOC621699 /// LOC624124 /// LOC634044 /// LOC670565  
1419365\_at 0.96524 peroxisomal biogenesis factor 11a Pex11a  
1419366\_at 1.06388 "zinc finger, matrin type 5" Zmat5  
1419367\_at 1.01163 "2,4-dienoyl CoA reductase 1, mitochondrial" Decr1  
1419368\_a\_at 1.03480 ring finger protein 138 Rnf138  
1419369\_at 0.86515 ring finger protein 138 Rnf138  
1419370\_a\_at 0.99718 microfibrillar-associated protein 1 Mfap1  
1419371\_s\_at 0.93712 golgi SNAP receptor complex member 2 Gosr2  
1419372\_at 1.03194 golgi SNAP receptor complex member 2 Gosr2  
1419373\_at 0.95093 "ATPase, H+ transporting, lysosomal V1 subunit B1" Atp6v1b1  
1419374\_at 1.10385 WW domain binding protein 4 Wbp4  
1419375\_at 0.91924 WW domain binding protein 4 Wbp4

1419376\_at 0.74819 RIKEN cDNA 1110018M03 gene 1110018M03Rik  
 1419377\_at 1.02209 "mediator of RNA polymerase II transcription, subunit 9 homolog (yeast)"  
 Med9  
 1419378\_a\_at 0.96580 FXYP domain-containing ion transport regulator 2 Fxyd2  
 1419379\_x\_at 1.00783 FXYP domain-containing ion transport regulator 2 Fxyd2  
 1419380\_at 1.01134 zinc finger protein 423 Zfp423  
 1419381\_at 0.93982 "telomeric repeat binding factor 2, interacting protein" Terf2ip  
 1419382\_a\_at 1.04815 dehydrogenase/reductase (SDR family) member 4 Dhrs4  
 1419383\_at 0.88965 "S100 protein, beta polypeptide, neural" S100b  
 1419384\_at 1.00773 protein interacting with C kinase 1 Pick1  
 1419385\_a\_at 1.03260 ubiquilin 1 Ubqln1  
 1419386\_at 0.98380 "mucin 13, epithelial transmembrane" Muc13  
 1419387\_s\_at 0.86109 "mucin 13, epithelial transmembrane" Muc13  
 1419388\_at 1.01879 transmembrane 4 L six family member 20 Tm4sf20  
 1419389\_at 1.08663 phosphodiesterase 10A Pde10a  
 1419390\_at 1.10786 phosphodiesterase 10A Pde10a  
 1419391\_at 0.96259 myogenin Myog  
 1419392\_at 0.97613 piccolo (presynaptic cytomatrix protein) Pclo  
 1419393\_at 0.89184 "ATP-binding cassette, sub-family G (WHITE), member 5" Abcg5  
 1419394\_s\_at 0.97088 S100 calcium binding protein A8 (calgranulin A) S100a8  
 1419395\_at 0.99038 acyl-CoA thioesterase 12 Acot12  
 1419396\_at 1.07854 AT rich interactive domain 3A (Bright like) Arid3a  
 1419397\_at 0.96928 "polymerase (DNA directed), alpha 1" Pola1  
 1419398\_a\_at 0.96080 receptor accessory protein 5 Reep5  
 1419399\_at 1.08683 microsomal triglyceride transfer protein Mttp  
 1419400\_at 1.07935 microsomal triglyceride transfer protein Mttp  
 1419401\_at 0.94376 ankyrin repeat and SOCS box-containing protein 13 Asb13  
 1419402\_at 0.94986 meiosis-specific nuclear structural protein 1 Mns1  
 1419403\_at 1.02827 cDNA sequence BC017612 BC017612  
 1419404\_s\_at 0.82161 seven in absentia 1A /// seven in absentia 1B Siah1a /// Siah1b  
 1419405\_at 0.98097 neuromedin B Nmb  
 1419406\_a\_at 1.08882 B-cell CLL/lymphoma 11A (zinc finger protein) Bcl11a  
 1419407\_at 1.09224 hemolytic complement Hc  
 1419408\_at 0.85188 sine oculis-related homeobox 6 homolog (Drosophila) Six6  
 1419409\_at 0.99682 small proline rich-like 5 Sprrl5  
 1419410\_at 1.03071 "basic leucine zipper transcription factor, ATF-like" Batf  
 1419411\_at 1.02092 tachykinin 2 Tac2  
 1419412\_at 0.98846 chemokine (C motif) ligand 1 Xcl1  
 1419413\_at 1.26455 chemokine (C-C motif) ligand 17 Ccl17  
 1419414\_at 1.03281 "guanine nucleotide binding protein 13, gamma" Gng13  
 1419415\_a\_at 0.94269 "retinoic acid receptor, gamma" Rarg  
 1419416\_a\_at 1.01532 "retinoic acid receptor, gamma" Rarg  
 1419417\_at 0.75396 vascular endothelial growth factor C Vegfc

1419418\_a\_at 1.15242 microrchidia 1 Morc1  
1419419\_at 1.08651 "DNA segment, human D6S2654E" D0H6S2654E  
1419420\_at 0.86449 "ST6 (alpha-N-acetyl-neuraminy1-2,3-beta-galactosyl-1,3)-N-acetylgalactosaminide alpha-2,6-sialyltransferase 5" St6galnac5  
1419421\_at 0.88770 "ankyrin 1, erythroid" Ank1  
1419422\_at 0.98919 polycystic kidney disease 2-like 2 Pkd2l2  
1419423\_at 0.98023 stabilin 2 Stab2  
1419424\_at 0.96868 "pancreas specific transcription factor, 1a" Ptf1a  
1419425\_at 0.99035 cannabinoid receptor 1 (brain) Cnr1  
1419426\_s\_at 0.95679 chemokine (C-C motif) ligand 21b /// chemokine (C-C motif) ligand 21a /// chemokine (C-C motif) ligand 21c (leucine) Ccl21b /// Ccl21a /// Ccl21c  
1419427\_at 1.28720 colony stimulating factor 3 (granulocyte) Csf3  
1419428\_a\_at 0.90348 "glucosidase, alpha, acid" Gaa  
1419429\_at 1.03689 ciliary neurotrophic factor receptor Cntfr  
1419430\_at 0.96450 "cytochrome P450, family 26, subfamily a, polypeptide 1" Cyp26a1  
1419431\_at 0.87500 epiregulin Ereg  
1419432\_at 1.02544 sperm adhesion molecule 1 Spam1  
1419433\_at 1.06270 nth (endonuclease III)-like 1 (E.coli) Nth1  
1419434\_at 0.95997 "solute carrier family 2 (facilitated glucose transporter), member 10" Slc2a10  
1419435\_at 0.89119 aldehyde oxidase 1 Aox1  
1419436\_at 0.98392 complement factor H-related 1 Cfhr1  
1419437\_at 0.98063 single-minded homolog 2 (Drosophila) Sim2  
1419438\_at 1.17413 single-minded homolog 2 (Drosophila) Sim2  
1419439\_at 1.00857 serine/threonine kinase 22 substrate 1 /// similar to serine/threonine kinase 22 substrate 1 Stk22s1 /// LOC672873  
1419440\_at 1.03274 tripartite motif-containing 54 Trim54  
1419441\_at 1.02805 acidic ribosomal phosphoprotein P0 Arbp  
1419442\_at 0.86344 matrilin 2 Matn2  
1419443\_at 1.05311 Sin3-associated polypeptide 18 Sap18  
1419444\_at 1.13434 Sin3-associated polypeptide 18 Sap18  
1419445\_s\_at 1.07232 Sin3-associated polypeptide 18 Sap18  
1419446\_at 0.83686 "TBC1 domain family, member 1" Tbc1d1  
1419447\_s\_at 0.92220 "TBC1 domain family, member 1" Tbc1d1  
1419448\_at 0.92452 "TBC1 domain family, member 1" Tbc1d1  
1419449\_a\_at 0.96191 "guanine nucleotide binding protein, alpha inhibiting 2" Gnai2  
1419450\_at 1.03739 ORM1-like 3 (S. cerevisiae) Ormdl3  
1419451\_at 0.94650 fizzy/cell division cycle 20 related 1 (Drosophila) Fzr1  
1419452\_at 1.06388 ubiquitin carboxyl-terminal esterase L5 Uchl5  
1419453\_at 1.09238 ubiquitin carboxyl-terminal esterase L5 Uchl5  
1419454\_x\_at 0.91919 protein inhibitor of activated STAT 2 Pias2  
1419455\_at 1.13132 "interleukin 10 receptor, beta" Il10rb  
1419456\_at 0.91391 dicarbonyl L-xylulose reductase Dcxr  
1419457\_at 0.98686 Rho-guanine nucleotide exchange factor Rgnef

|              |         |                                                                                                                         |                   |
|--------------|---------|-------------------------------------------------------------------------------------------------------------------------|-------------------|
| 1419458_at   | 1.01788 | Rho-guanine nucleotide exchange factor                                                                                  | Rgnef             |
| 1419459_a_at | 0.97371 | RIKEN cDNA 2610529C04 gene                                                                                              | 2610529C04Rik     |
| 1419460_at   | 1.03691 | ribonuclease P 14 subunit (human)                                                                                       | Rpp14             |
| 1419461_at   | 1.08310 | ribonuclease P 14 subunit (human)                                                                                       | Rpp14             |
| 1419462_s_at | 1.02853 | gene trap locus 3                                                                                                       | Gtl3              |
| 1419463_at   | 2.04763 | chloride channel calcium activated 2                                                                                    | Clca2             |
| 1419464_at   | 0.99949 | RIKEN cDNA 2810046M22 gene                                                                                              | 2810046M22Rik     |
| 1419465_at   | 0.98087 | naked cuticle 2 homolog (Drosophila)                                                                                    | Nkd2              |
| 1419466_at   | 0.98356 | naked cuticle 2 homolog (Drosophila)                                                                                    | Nkd2              |
| 1419467_at   | 1.10987 | "C-type lectin domain family 14, member a"                                                                              | Clec14a           |
| 1419468_at   | 1.02658 | "C-type lectin domain family 14, member a"                                                                              | Clec14a           |
| 1419469_at   | 0.73713 | "guanine nucleotide binding protein, beta 4"                                                                            | Gnb4              |
| 1419470_at   | 0.76323 | "guanine nucleotide binding protein, beta 4"                                                                            | Gnb4              |
| 1419471_a_at | 1.11955 | nuclear distribution gene C homolog (Aspergillus)                                                                       | Nudc              |
| 1419472_s_at | 1.08025 | "nuclear distribution gene C homolog (Aspergillus) /// nuclear distribution gene C homolog (Aspergillus), pseudogene 1" | Nudc /// Nudc-ps1 |
| 1419473_a_at | 0.98468 | cholecystokinin                                                                                                         | Cck               |
| 1419474_a_at | 1.01629 | ets homologous factor                                                                                                   | Ehf               |
| 1419475_a_at | 1.00647 | ets homologous factor                                                                                                   | Ehf               |
| 1419476_at   | 0.94488 | "ADAM-like, decysin 1"                                                                                                  | Adamdec1          |
| 1419477_at   | 1.04456 | "C-type lectin domain family 2, member d"                                                                               | Clec2d            |
| 1419478_at   | 1.07255 | secreted and transmembrane 1                                                                                            | Sectm1            |
| 1419479_at   | 1.02519 | secreted and transmembrane 1                                                                                            | Sectm1            |
| 1419480_at   | 0.97827 | "selectin, lymphocyte"                                                                                                  | Sell              |
| 1419481_at   | 0.99259 | "selectin, lymphocyte"                                                                                                  | Sell              |
| 1419482_at   | 1.14830 | complement component 3a receptor 1                                                                                      | C3ar1             |
| 1419483_at   | 1.17715 | complement component 3a receptor 1                                                                                      | C3ar1             |
| 1419484_a_at | 0.86042 | glioblastoma amplified sequence                                                                                         | Gbas              |
| 1419485_at   | 0.76069 | forkhead box C1                                                                                                         | Foxc1             |
| 1419486_at   | 0.68906 | forkhead box C1                                                                                                         | Foxc1             |
| 1419487_at   | 0.88515 | myosin binding protein H                                                                                                | Mybph             |
| 1419488_at   | 1.03498 | TNFAIP3 interacting protein 2                                                                                           | Tnip2             |
| 1419489_at   | 0.97881 | expressed sequence AW049604                                                                                             | AW049604          |
| 1419490_at   | 0.94228 | expressed sequence AW049604                                                                                             | AW049604          |
| 1419491_at   | 0.90415 | defensin beta 1                                                                                                         | Defb1             |
| 1419492_s_at | 0.97287 | defensin beta 1                                                                                                         | Defb1             |
| 1419493_a_at | 0.97467 | tumor protein D52                                                                                                       | Tpd52             |
| 1419494_a_at | 1.02403 | tumor protein D52                                                                                                       | Tpd52             |
| 1419495_at   | 1.07617 | IMP2 inner mitochondrial membrane peptidase-like (S. cerevisiae)                                                        | Imp21             |
| 1419496_at   | 1.01185 | "solute carrier organic anion transporter family, member 1a6"                                                           | Slco1a6           |
| 1419497_at   | 0.81809 | cyclin-dependent kinase inhibitor 1B                                                                                    | Cdkn1b            |
| 1419498_at   | 0.99194 | transmembrane and immunoglobulin domain containing 1                                                                    | Tmigd1            |
| 1419499_at   | 0.92926 | "glycerol-3-phosphate acyltransferase, mitochondrial"                                                                   | Gpam              |

1419500\_at 0.89757 "poly A binding protein, cytoplasmic 2" Pabpc2  
1419501\_at 1.18028 "polymerase (DNA directed), kappa" Polk  
1419502\_at 0.94475 GH3 domain containing Ghdc  
1419503\_at 0.99073 stanniocalcin 2 Stc2  
1419504\_at 1.20253 monoacylglycerol O-acyltransferase 1 Mogat1  
1419505\_a\_at 0.96397 geranylgeranyl diphosphate synthase 1 Ggps1  
1419506\_at 0.95768 geranylgeranyl diphosphate synthase 1 Ggps1  
1419507\_at 1.00626 keratin associated protein 15 Krtap15  
1419508\_at 0.93220 receptor (TNFRSF)-interacting serine-threonine kinase 1 Ripk1  
1419509\_a\_at 1.04620 N-acetylglucosamine kinase Nagk  
1419510\_at 0.93627 esterase 22 Es22  
1419511\_at 0.96101 mutS homolog 4 (E. coli) Msh4  
1419512\_at 0.77368 PRP40 pre-mRNA processing factor 40 homolog B (yeast) Prpf40b  
1419513\_a\_at 0.97491 ect2 oncogene Ect2  
1419514\_at 0.98707 paired-like homeodomain transcription factor 1 Pitx1  
1419515\_at 0.99863 "FYVE, RhoGEF and PH domain containing 2" Fgd2  
1419516\_at 1.09765 "DNA segment, human DXS9928E" D0HXS9928E  
1419517\_at 0.98151 cornichon homolog 3 (Drosophila) Cnih3  
1419518\_at 0.96761 "tubulin, alpha 8" Tuba8  
1419519\_at 0.69357 insulin-like growth factor 1 Igf1  
1419520\_at 0.99033 camello-like 4 Cml4  
1419521\_at 1.12495 zinc finger protein 94 Zfp94  
1419522\_at 1.14369 "zinc finger, MYND domain containing 19" Zmynd19  
1419523\_at 1.04517 "cytochrome P450, family 3, subfamily a, polypeptide 13" Cyp3a13  
1419524\_at 1.08662 tryptophan hydroxylase 1 Tph1  
1419525\_at 1.10218 "carbonic anhydrase 5a, mitochondrial" Car5a  
1419526\_at 0.84660 Gardner-Rasheed feline sarcoma viral (Fgr) oncogene homolog Fgr  
1419527\_at 0.75984 cartilage oligomeric matrix protein Comp  
1419528\_at 0.92422 "sulfotransferase family 2A, dehydroepiandrosterone (DHEA)-preferring, member 2" Sult2a2  
1419529\_at 0.95172 "interleukin 23, alpha subunit p19" Il23a  
1419530\_at 1.03911 interleukin 12b Il12b  
1419531\_at 0.93696 RIKEN cDNA 1700102P08 gene 1700102P08Rik  
1419532\_at 1.05634 "interleukin 1 receptor, type II" Il1r2  
1419533\_at 1.07490 nescient helix loop helix 1 Nhlh1  
1419534\_at 1.11611 oxidized low density lipoprotein (lectin-like) receptor 1 Olr1  
1419535\_at 0.86188 "solute carrier organic anion transporter family, member 6b1" Slco6b1  
1419536\_a\_at 0.94349 v-rel reticuloendotheliosis viral oncogene homolog A (avian) Rela  
1419537\_at 0.99572 transcription factor EC Tcfec  
1419538\_at 0.99307 FMS-like tyrosine kinase 3 Flt3  
1419539\_at 0.89846 Iroquois related homeobox 4 (Drosophila) Irx4  
1419540\_at 1.03867 "ferritin, heavy polypeptide-like 17 /// similar to ferritin, heavy polypeptide-like 17 /// similar to ferritin, heavy polypeptide-like 17 /// similar to ferritin, heavy polypeptide-like 17"



## Fthl17 /// LOC434726 /// LOC434727 /// LOC434728

|              |         |                                                                                |               |
|--------------|---------|--------------------------------------------------------------------------------|---------------|
| 1419541_at   | 0.98722 | RIKEN cDNA 4930403L05 gene                                                     | 4930403L05Rik |
| 1419542_at   | 0.93429 | deleted in azoospermia-like                                                    | Dazl          |
| 1419543_a_at | 1.06504 | "splicing factor, arginine/serine-rich 10 (transformer 2 homolog, Drosophila)" | Sfrs10        |
| 1419544_at   | 1.07331 | "ATPase, H+ transporting, lysosomal V1 subunit C1"                             | Atp6v1c1      |
| 1419545_a_at | 1.07527 | "ATPase, H+ transporting, lysosomal V1 subunit C1"                             | Atp6v1c1      |
| 1419546_at   | 1.06271 | "ATPase, H+ transporting, lysosomal V1 subunit C1"                             | Atp6v1c1      |
| 1419547_at   | 1.20378 | fumarylacetoacetate hydrolase domain containing 1                              | Fahd1         |
| 1419548_at   | 1.06155 | karyopherin (importin) alpha 1                                                 | Kpna1         |
| 1419549_at   | 1.00034 | "arginase 1, liver"                                                            | Arg1          |
| 1419550_a_at | 0.88131 | "serine/threonine kinase 39, STE20/SPS1 homolog (yeast)"                       | Stk39         |
| 1419551_s_at | 0.90393 | "serine/threonine kinase 39, STE20/SPS1 homolog (yeast)"                       | Stk39         |
| 1419552_at   | 1.08624 | enoyl Coenzyme A hydratase domain containing 1                                 | Echdc1        |
| 1419553_a_at | 1.04473 | "RAB geranylgeranyl transferase, b subunit"                                    | Rabggtb       |
| 1419554_at   | 1.23286 | "CD47 antigen (Rh-related antigen, integrin-associated signal transducer)"     | Cd47          |
| 1419555_at   | 0.99217 | E74-like factor 5                                                              | Elf5          |
| 1419556_at   | 0.92753 | E74-like factor 5                                                              | Elf5          |
| 1419557_a_at | 0.81672 | transmembrane protein 9                                                        | Tmem9         |
| 1419558_at   | 1.02193 | transformed mouse 3T3 cell double minute 4                                     | Mdm4          |
| 1419559_at   | 0.90362 | "cytochrome P450, family 4, subfamily f, polypeptide 14"                       | Cyp4f14       |
| 1419560_at   | 0.75762 | "lipase, hepatic"                                                              | Lipc          |
| 1419561_at   | 0.88731 | chemokine (C-C motif) ligand 3                                                 | Ccl3          |
| 1419562_at   | 1.02439 | baculoviral IAP repeat-containing 6                                            | Birc6         |
| 1419563_at   | 1.02446 | baculoviral IAP repeat-containing 6                                            | Birc6         |
| 1419564_at   | 0.86968 | zinc finger protein 467                                                        | Zfp467        |
| 1419565_a_at | 0.87361 | zinc finger protein X-linked                                                   | Zfx           |
| 1419566_at   | 0.88730 | fibronectin type 3 and ankyrin repeat domains 1                                | Fank1         |
| 1419567_at   | 1.01334 | fibronectin type 3 and ankyrin repeat domains 1                                | Fank1         |
| 1419568_at   | 1.06818 | mitogen activated protein kinase 1                                             | Mapk1         |
| 1419569_a_at | 0.99418 | interferon-stimulated protein                                                  | Isg20         |
| 1419570_at   | 1.04513 | "solute carrier family 28 (sodium-coupled nucleoside transporter), member 3"   | Slc28a3       |
| 1419571_at   | 1.03754 | "solute carrier family 28 (sodium-coupled nucleoside transporter), member 3"   | Slc28a3       |
| 1419572_a_at | 1.14186 | "ATP-binding cassette, sub-family D (ALD), member 4"                           | Abcd4         |
| 1419573_a_at | 1.00211 | "lectin, galactose binding, soluble 1"                                         | Lgals1        |
| 1419574_at   | 0.94135 | zinc finger protein 292                                                        | Zfp292        |
| 1419575_s_at | 0.91093 | zinc finger protein 292                                                        | Zfp292        |
| 1419576_at   | 1.04566 | homeo box B13                                                                  | Hoxb13        |
| 1419577_at   | 0.83196 | RIKEN cDNA A530089I17 gene                                                     | A530089I17Rik |
| 1419578_at   | 1.01525 | mannose binding lectin (A)                                                     | Mbl1          |

1419579\_at 1.03354 "solute carrier family 7 (cationic amino acid transporter, y+ system), member 12" Slc7a12

1419580\_at 0.93384 --- ---

1419581\_at 0.77775 "discs, large homolog 4 (Drosophila)" Dlgh4

1419582\_at 1.00805 "cytochrome P450, family 2, subfamily c, polypeptide 55" Cyp2c55

1419583\_at 0.79359 chromobox homolog 4 (Drosophila Pc class) Cbx4

1419584\_at 0.74050 tetratricopeptide repeat domain 28 Ttc28

1419585\_at 1.10238 retinitis pigmentosa 2 homolog (human) Rp2h

1419586\_at 1.00528 retinitis pigmentosa 2 homolog (human) Rp2h

1419587\_s\_at 1.01457 retinitis pigmentosa 2 homolog (human) Rp2h

1419588\_at 0.92606 sperm associated antigen 1 Spag1

1419589\_at 0.90483 CD93 antigen Cd93

1419590\_at 0.88949 "cytochrome P450, family 2, subfamily b, polypeptide 9" Cyp2b9

1419591\_at 0.94153 "melanoma-derived leucine zipper, extra-nuclear factor" Mlze

1419592\_at 0.90638 unc-5 homolog C (C. elegans) Unc5c

1419593\_at 0.85992 gene regulated by estrogen in breast cancer protein Greb1

1419594\_at 0.89711 cathepsin G Ctsg

1419595\_a\_at 0.86261 gamma-glutamyl hydrolase /// similar to Gamma-glutamyl hydrolase precursor (Gamma-Glu-x carboxypeptidase) (Conjugase) (GH) (Folylpolyglutamate hydrolase) (FGPH) Ggh /// LOC667301

1419596\_at 0.94694 ectodysplasin-A /// similar to Ectodysplasin-A (EDA protein homolog) (Tabby protein) Eda /// LOC675952

1419597\_at 0.97506 ectodysplasin-A Eda

1419598\_at 0.93933 "membrane-spanning 4-domains, subfamily A, member 6D" Ms4a6d

1419599\_s\_at 1.04870 "membrane-spanning 4-domains, subfamily A, member 11" Ms4a11

1419600\_at 0.96046 defensin beta 4 Defb4

1419601\_at 1.01092 "potassium inwardly-rectifying channel, subfamily J, member 10" Kcnj10

1419602\_at 0.94302 homeo box A2 Hoxa2

1419603\_at 1.11061 similar to Interferon-activatable protein 204 (Ifi-204) (Interferon-inducible protein p204) LOC672547

1419604\_at 0.97391 Z-DNA binding protein 1 Zbp1

1419605\_at 0.88862 macrophage galactose N-acetyl-galactosamine specific lectin 1 Mgl1

1419606\_a\_at 0.98331 "troponin T1, skeletal, slow" Tnnt1

1419607\_at 0.84808 tumor necrosis factor Tnf

1419608\_a\_at 0.94271 melanoma inhibitory activity 1 Mia1

1419609\_at 1.01230 chemokine (C-C motif) receptor 1 Ccr1

1419610\_at 0.99913 chemokine (C-C motif) receptor 1 Ccr1

1419611\_at 0.97151 --- ---

1419612\_at 0.98301 RIKEN cDNA 4632415L05 gene 4632415L05Rik

1419613\_at 1.32142 "procollagen, type VII, alpha 1" Col7a1

1419614\_at 1.06522 "phospholipase A2, group XIIB" Pla2g12b

1419615\_at 0.88687 "transient receptor potential cation channel, subfamily V, member 6" Trpv6

1419616\_at 1.16928 "bone morphogenic protein receptor, type II (serine/threonine kinase)" Bmpr2

1419617\_at 0.88696 "potassium intermediate/small conductance calcium-activated channel, subfamily N, member 1" Kcnn1  
 1419618\_at 1.07816 "butyrobetaine (gamma), 2-oxoglutarate dioxygenase 1 (gamma-butyrobetaine hydroxylase)" Bbox1  
 1419619\_at 1.05821 keratin 80 Krt80  
 1419620\_at 1.25014 pituitary tumor-transforming 1 Pttg1  
 1419621\_at 0.99071 ankyrin repeat domain 2 (stretch responsive muscle) Ankrd2  
 1419622\_at 0.94405 "UDP glucuronosyltransferase 2 family, polypeptide B5" Ugt2b5  
 1419623\_at 0.95956 "protease, serine, 21" Prss21  
 1419624\_a\_at 1.06255 RIKEN cDNA 1700010I14 gene 1700010I14Rik  
 1419625\_at 1.03462 heat shock protein 1-like Hspa11  
 1419626\_at 1.06358 similar to ADAM 25 precursor (A disintegrin and metalloproteinase domain 25) (Testase 2) LOC382006  
 1419627\_s\_at 0.91904 "C-type lectin domain family 4, member n" Clec4n  
 1419628\_at 1.01791 C. elegans ceh-10 homeo domain containing homolog Chx10  
 1419629\_at 1.06439 mesoderm posterior 2 Mesp2  
 1419630\_a\_at 1.11923 tripartite motif protein 11 Trim11  
 1419631\_at 1.02710 Wiskott-Aldrich syndrome homolog (human) Was  
 1419632\_at 0.86415 tectorin alpha Tecta  
 1419633\_at 0.97724 Unc4.1 homeobox (C. elegans) Uncx4.1  
 1419634\_a\_at 1.00561 growth hormone releasing hormone Ghrh  
 1419635\_at 0.83912 RIKEN cDNA 4833420G17 gene 4833420G17Rik  
 1419636\_at 1.06416 RIKEN cDNA 4833420G17 gene 4833420G17Rik  
 1419637\_s\_at 0.96587 RIKEN cDNA 4833420G17 gene 4833420G17Rik  
 1419638\_at 0.80671 ephrin B2 Efnb2  
 1419639\_at 0.83160 ephrin B2 Efnb2  
 1419640\_at 1.04011 purine rich element binding protein B Purb  
 1419641\_at 1.13962 purine rich element binding protein B Purb  
 1419642\_at 1.11953 purine rich element binding protein B Purb  
 1419643\_s\_at 1.11481 RIKEN cDNA 2310057J18 gene /// RIKEN cDNA 2310065H11 gene 2310057J18Rik /// 2310065H11Rik  
 1419644\_at 1.03914 "cleavage stimulation factor, 3' pre-RNA subunit 2" Cstf2  
 1419645\_at 0.99290 "cleavage stimulation factor, 3' pre-RNA subunit 2" Cstf2  
 1419646\_a\_at 0.86459 myelin basic protein Mbp  
 1419647\_a\_at 1.50754 immediate early response 3 Ier3  
 1419648\_at 1.03201 myosin IC Myo1c  
 1419649\_s\_at 1.04336 myosin IC Myo1c  
 1419650\_at 1.01112 zinc finger RNA binding protein Zfr  
 1419651\_at 1.02488 RIKEN cDNA 2610200G18 gene 2610200G18Rik  
 1419652\_s\_at 1.01018 RIKEN cDNA 2610200G18 gene 2610200G18Rik  
 1419653\_a\_at 0.96857 DEAD (Asp-Glu-Ala-Asp) box polypeptide 5 Ddx5  
 1419654\_at 0.88204 "transducin-like enhancer of split 3, homolog of Drosophila E(spl)" Tle3  
 1419655\_at 0.85765 "transducin-like enhancer of split 3, homolog of Drosophila E(spl)" Tle3

1419656\_at 0.71948 "solute carrier family 25, member 36" Slc25a36  
1419657\_a\_at 0.91411 "solute carrier family 25, member 36" Slc25a36  
1419658\_at 1.09012 RIKEN cDNA C920025E04 gene C920025E04Rik  
1419659\_s\_at 0.95516 cysteine-rich hydrophobic domain 2 Chic2  
1419660\_at 0.93906 RIKEN cDNA 1600012F09 gene 1600012F09Rik  
1419661\_at 0.96760 RIKEN cDNA 1600012F09 gene /// hypothetical LOC624446  
1600012F09Rik /// LOC624446  
1419662\_at 0.69936 osteoglycin Ogn  
1419663\_at 0.68411 osteoglycin Ogn  
1419664\_at 0.93444 serine racemase Srr  
1419665\_a\_at 1.37603 nuclear protein 1 Nupr1  
1419666\_x\_at 1.32508 nuclear protein 1 Nupr1  
1419667\_at 0.75772 "sarcoglycan, beta (dystrophin-associated glycoprotein)" Sgcb  
1419668\_at 0.77042 "sarcoglycan, beta (dystrophin-associated glycoprotein)" Sgcb  
1419669\_at 0.79882 proteinase 3 Prtn3  
1419670\_at 1.09996 formiminotransferase cyclodeaminase Ftcd  
1419671\_a\_at 0.86187 interleukin 17 receptor C Il17rc  
1419672\_at 0.97096 "sparc/osteonectin, cwcv and kazal-like domains proteoglycan 1" Spock1  
1419673\_at 1.11908 "sparc/osteonectin, cwcv and kazal-like domains proteoglycan 1 /// similar to  
sparc/osteonectin, cwcv and kazal-like domains proteoglycan 1" Spock1 /// LOC671214  
1419674\_a\_at 0.99226 dipeptidase 1 (renal) Dpep1  
1419675\_at 0.79456 "nerve growth factor, beta" Ngfb  
1419676\_at 1.10638 myxovirus (influenza virus) resistance 2 Mx2  
1419677\_at 0.92009 mannan-binding lectin serine peptidase 1 Masp1  
1419678\_at 0.95110 large tumor suppressor 2 Lats2  
1419679\_at 1.10990 large tumor suppressor 2 Lats2  
1419680\_a\_at 1.07060 elaC homolog 2 (E. coli) Elac2  
1419681\_a\_at 0.99805 prokineticin 2 Prok2  
1419682\_a\_at 1.20231 Trp53 regulating kinase /// RIKEN cDNA 2810408M09 gene Trp53rk ///  
2810408M09Rik  
1419683\_at 1.18019 Trp53 regulating kinase Trp53rk  
1419684\_at 1.25065 chemokine (C-C motif) ligand 8 Ccl8  
1419685\_at 0.98857 UPF1 regulator of nonsense transcripts homolog (yeast) Upf1  
1419686\_at 1.02039 testis specific gene A14 Tsga14  
1419687\_at 0.91822 RIKEN cDNA D930010J01 gene D930010J01Rik  
1419688\_at 0.75811 glypican 6 Gpc6  
1419689\_at 0.93952 glypican 6 Gpc6  
1419690\_at 0.97612 RIKEN cDNA 2610002M06 gene 2610002M06Rik  
1419691\_at 1.05188 cathelicidin antimicrobial peptide Camp  
1419692\_a\_at 1.16251 leukotriene C4 synthase Ltc4s  
1419693\_at 1.00867 collectin sub-family member 12 Colec12  
1419694\_at 0.92441 "ST8 alpha-N-acetyl-neuraminide alpha-2,8-sialyltransferase 1" St8sia1  
1419695\_at 0.90807 "ST8 alpha-N-acetyl-neuraminide alpha-2,8-sialyltransferase 1" St8sia1

1419696\_at 0.97559 CD4 antigen Cd4  
1419697\_at 2.56569 chemokine (C-X-C motif) ligand 11 Cxcl11  
1419698\_at 1.35578 chemokine (C-X-C motif) ligand 11 Cxcl11  
1419699\_at 1.01413 "secretoglobin, family 3A, member 1" Scgb3a1  
1419700\_a\_at 1.01971 prominin 1 Prom1  
1419701\_s\_at 1.09487 ankyrin repeat and sterile alpha motif domain containing 3 Anks3  
1419702\_at 1.14406 "TATA box binding protein (Tbp)-associated factor, RNA polymerase I, A" Taf1a  
1419703\_at 1.12225 "procollagen, type V, alpha 3" Col5a3  
1419704\_at 1.07089 "cytochrome P450, family 3, subfamily a, polypeptide 41" Cyp3a41  
1419705\_at 0.79570 "carbonic anhydrase 5b, mitochondrial" Car5b  
1419706\_a\_at 0.69399 A kinase (PRKA) anchor protein (gravin) 12 Akap12  
1419707\_at 0.90315 keratin associated protein 14 Krtap14  
1419708\_at 0.95111 wingless-related MMTV integration site 6 Wnt6  
1419709\_at 0.93228 stefin A3 Stfa3  
1419710\_at 0.91664 neurexophilin 3 Nxph3  
1419711\_at 0.99655 CD7 antigen Cd7  
1419712\_at 0.94614 "interleukin 3 receptor, alpha chain" Il3ra  
1419713\_at 0.90154 "ATPase, Class I, type 8B, member 3" Atp8b3  
1419714\_at 1.14861 CD274 antigen Cd274  
1419715\_at 1.02623 RIKEN cDNA 1700029F12 gene 1700029F12Rik  
1419716\_a\_at 1.04128 "POU domain, class 2, transcription factor 1" Pou2f1  
1419717\_at 0.99344 "sema domain, immunoglobulin domain (Ig), short basic domain, secreted, (semaphorin) 3E" Sema3e  
1419718\_at 0.98360 RIKEN cDNA 4921530L21 gene 4921530L21Rik  
1419719\_at 1.04581 "gamma-aminobutyric acid (GABA-A) receptor, subunit beta 1 /// RIKEN cDNA B230208N19 gene" Gabrb1 /// B230208N19Rik  
1419720\_at 0.87688 glycoprotein 9 (platelet) Gp9  
1419721\_at 0.89210 G protein-coupled receptor 109A Gpr109a  
1419722\_at 0.96102 kallikrein 8 Klk8  
1419723\_at 0.94384 "opsin 1 (cone pigments), medium-wave-sensitive (color blindness, deutan)" Opn1mw  
1419724\_at 0.99782 ectodysplasin-A receptor /// similar to Tumor necrosis factor receptor superfamily member EDAR precursor (Anhidrotic ectodysplasin receptor 1) (Ectodysplasin-A receptor) (Ectodermal dysplasia receptor) (Downless) Edar /// LOC669001  
1419725\_at 0.86571 "solute carrier family 26, member 4" Slc26a4  
1419726\_at 1.04702 a disintegrin and metallopeptidase domain 18 Adam18  
1419727\_at 0.95086 decay accelerating factor 2 Daf2  
1419728\_at 17.96972 chemokine (C-X-C motif) ligand 5 Cxcl5  
1419729\_at 0.92451 testis expressed gene 11 Tex11  
1419730\_at 1.27952 RIKEN cDNA 4631427C17 gene 4631427C17Rik  
1419731\_at 1.09461 "cytochrome P450, family 2, subfamily b, polypeptide 19" Cyp2b19  
1419732\_at 0.94276 reticulon 4 receptor Rtn4r

|              |         |                                                                                              |               |
|--------------|---------|----------------------------------------------------------------------------------------------|---------------|
| 1419733_at   | 0.94612 | GLI pathogenesis-related 1 like 2                                                            | Glipr112      |
| 1419734_at   | 1.27109 | "actin, beta, cytoplasmic"                                                                   | Actb          |
| 1419735_at   | 1.17759 | casein kappa                                                                                 | Csn3          |
| 1419736_a_at | 1.02736 | "eukaryotic translation initiation factor 1A, Y-linked"                                      | Eif1ay        |
| 1419737_a_at | 1.22801 | lactate dehydrogenase A                                                                      | Ldha          |
| 1419738_a_at | 0.87767 | "tropomyosin 2, beta"                                                                        | Tpm2          |
| 1419739_at   | 0.84181 | "tropomyosin 2, beta"                                                                        | Tpm2          |
| 1419740_at   | 0.94269 | "phosphodiesterase 6B, cGMP, rod receptor, beta polypeptide"                                 | Pde6b         |
| 1419741_at   | 1.06494 | suppressor of Ty 16 homolog ( <i>S. cerevisiae</i> )                                         | Supt16h       |
| 1419742_at   | 1.03071 | RIKEN cDNA 1700037H04 gene                                                                   | 1700037H04Rik |
| 1419743_s_at | 0.98727 | coactivator-associated arginine methyltransferase 1                                          | Carm1         |
| 1419744_at   | 0.95985 | "histocompatibility 2, class II, locus Mb2"                                                  | H2-DMb2       |
| 1419745_at   | 0.99590 | Rho GTPase activating protein 23                                                             | Arhgap23      |
| 1419746_at   | 1.11729 | Rho GTPase activating protein 23                                                             | Arhgap23      |
| 1419747_at   | 1.06167 | asialoglycoprotein receptor 2                                                                | Asgr2         |
| 1419748_at   | 0.94544 | "ATP-binding cassette, sub-family D (ALD), member 2"                                         | Abcd2         |
| 1419749_at   | 1.01441 | DNA methyltransferase 2                                                                      | Dnmt2         |
| 1419750_at   | 1.16193 | DNA methyltransferase 2                                                                      | Dnmt2         |
| 1419751_x_at | 0.94285 | cDNA sequence AB056442                                                                       | AB056442      |
| 1419752_at   | 1.03136 | "nuclear transcription factor, X-box binding 1"                                              | Nfx1          |
| 1419753_at   | 0.98284 | "nuclear transcription factor, X-box binding 1"                                              | Nfx1          |
| 1419754_at   | 1.25580 | myosin Va                                                                                    | Myo5a         |
| 1419755_at   | 1.00050 | antigen p97 (melanoma associated) identified by monoclonal antibodies 133.2 and 96.5         | Mfi2          |
| 1419756_at   | 1.04356 | "diacylglycerol kinase, gamma"                                                               | Dgkg          |
| 1419757_at   | 0.92134 | "phosphatidylinositol transfer protein, membrane-associated 2"                               | Pitpmn2       |
| 1419758_at   | 1.01937 | "ATP-binding cassette, sub-family B (MDR/TAP), member 1A"                                    | Abcb1a        |
| 1419759_at   | 1.05133 | "ATP-binding cassette, sub-family B (MDR/TAP), member 1A"                                    | Abcb1a        |
| 1419760_a_at | 0.99591 | open reading frame 5                                                                         | ORF5          |
| 1419761_a_at | 0.84408 | "GA repeat binding protein, beta 1"                                                          | Gabpb1        |
| 1419762_at   | 1.73338 | ubiquitin D                                                                                  | Ubd           |
| 1419763_at   | 0.90075 | RIKEN cDNA 2610020O08 gene                                                                   | 2610020O08Rik |
| 1419764_at   | 1.02081 | chitinase 3-like 3                                                                           | Chi3l3        |
| 1419765_at   | 0.96260 | cullin 2                                                                                     | Cul2          |
| 1419766_at   | 0.98792 | SNF1-like kinase                                                                             | Snf1lk        |
| 1419767_at   | 1.23128 | "peptidyl arginine deiminase, type III"                                                      | Padi3         |
| 1419768_at   | 0.96434 | CD22 antigen                                                                                 | Cd22          |
| 1419769_at   | 0.90422 | CD22 antigen                                                                                 | Cd22          |
| 1419770_at   | 0.97220 | ---                                                                                          | ---           |
| 1419771_at   | 1.02149 | "PREDICTED: Mus musculus similar to dachsous 2 isoform 2 (LOC627094), mRNA"                  | ---           |
| 1419772_at   | 1.04075 | Myeloid/lymphoid or mixed lineage-leukemia translocation to 10 homolog ( <i>Drosophila</i> ) | Mllt10        |

|              |         |                                                              |               |
|--------------|---------|--------------------------------------------------------------|---------------|
| 1419773_at   | 0.88437 | RIKEN cDNA 2010301N04 gene                                   | 2010301N04Rik |
| 1419774_at   | 0.95070 | "DNA segment, Chr 2, ERATO Doi 239, expressed"               | D2Ertd239e    |
| 1419775_at   | 0.86830 | ---                                                          | ---           |
| 1419776_at   | 1.06304 | ---                                                          | ---           |
| 1419777_at   | 0.91749 | Serine/threonine kinase 25 (yeast)                           | Stk25         |
| 1419778_at   | 1.04186 | ---                                                          | ---           |
| 1419779_at   | 1.07262 | ---                                                          | ---           |
| 1419780_at   | 0.92369 | ---                                                          | ---           |
| 1419781_at   | 0.87161 | RIKEN cDNA D630004N19 gene                                   | D630004N19Rik |
| 1419782_at   | 0.87136 | expressed sequence AA517864                                  | AA517864      |
| 1419783_at   | 0.94503 | ---                                                          | ---           |
| 1419784_x_at | 0.90961 | ---                                                          | ---           |
| 1419785_at   | 0.92911 | expressed sequence AA516738                                  | AA516738      |
| 1419786_at   | 1.07447 | latent transforming growth factor beta binding protein 1     | Ltbp1         |
| 1419787_a_at | 0.89633 | zinc finger protein 628 Zfp628                               |               |
| 1419788_at   | 0.87665 | Transcribed locus                                            | ---           |
| 1419789_at   | 0.92141 | "Centaurin, gamma 1"                                         | Centg1        |
| 1419790_at   | 0.94800 | ---                                                          | ---           |
| 1419791_at   | 0.93771 | zinc fingers and homeoboxes 3                                | Zhx3          |
| 1419792_at   | 1.04450 | M-phase phosphoprotein 1                                     | Mphosph1      |
| 1419793_at   | 1.08255 | "DNA segment, Chr 5, ERATO Doi 615, expressed"               | D5Ertd615e    |
| 1419794_at   | 0.90845 | Transcribed locus                                            | ---           |
| 1419795_at   | 0.93933 | expressed sequence AA517631                                  | AA517631      |
| 1419796_at   | 1.05776 | ---                                                          | ---           |
| 1419797_at   | 1.09253 | expressed sequence AA672641                                  | AA672641      |
| 1419798_at   | 1.17728 | RIKEN cDNA 2610019E17 gene                                   | 2610019E17Rik |
| 1419799_at   | 1.03669 | "Proteasome (prosome, macropain) 26S subunit, non-ATPase, 1" | Psmd1         |
| 1419800_at   | 1.08248 | Transcribed locus                                            | ---           |
| 1419801_x_at | 1.03028 | Transcribed locus                                            | ---           |
| 1419802_at   | 0.97584 | coiled-coil domain containing 12                             | Ccdc12        |
| 1419803_s_at | 1.03111 | coiled-coil domain containing 12                             | Ccdc12        |
| 1419804_at   | 1.07112 | RIKEN cDNA 1700051A21 gene                                   | 1700051A21Rik |
| 1419805_s_at | 0.96752 | geranylgeranyl diphosphate synthase 1                        | Ggps1         |
| 1419806_at   | 0.92992 | high density lipoprotein (HDL) binding protein               | Hdlbp         |
| 1419807_at   | 0.91922 | "DNA segment, Chr 4, ERATO Doi 335, expressed"               | D4Ertd335e    |
| 1419808_at   | 1.02632 | component of oligomeric golgi complex 4                      | Cog4          |
| 1419809_s_at | 0.94442 | component of oligomeric golgi complex 4                      | Cog4          |
| 1419810_x_at | 0.85933 | Rho GTPase activating protein 9                              | Arhgap9       |
| 1419811_at   | 0.76345 | "DNA segment, Chr 16, Wayne State University 65, expressed"  | D16Wsu65e     |
| 1419812_s_at | 1.06271 | coiled-coil domain containing 56                             | Ccdc56        |
| 1419813_at   | 0.93069 | Transcribed locus                                            | ---           |
| 1419814_s_at | 0.76958 | S100 calcium binding protein A1                              | S100a1        |
| 1419815_at   | 0.94454 | methyltransferase 11 domain containing 1                     | Mett11d1      |

1419816\_s\_at 0.88847 ERBB receptor feedback inhibitor 1 Errf1  
1419817\_s\_at 1.16231 "DNA segment, Chr 1, ERATO Doi 161, expressed" D1Ert161e  
1419818\_x\_at 0.98427 "DNA segment, Chr 1, ERATO Doi 161, expressed" D1Ert161e  
1419819\_s\_at 1.08114 SEC63-like (*S. cerevisiae*) Sec63  
1419820\_at 0.50608 polycystic kidney and hepatic disease 1 Pkhd1  
1419821\_s\_at 1.27236 "isocitrate dehydrogenase 1 (NADP+), soluble" Idh1  
1419822\_at 0.92388 "Eukaryotic translation initiation factor 3, subunit 6" Eif3s6  
1419823\_s\_at 1.06531 kinase suppressor of ras 1 Ksr1  
1419824\_a\_at 1.11117 RIKEN cDNA A230062G08 gene A230062G08Rik  
1419825\_at 0.98657 Neurexin III Nrxn3  
1419826\_at 0.90187 kinesin family member 17 Kif17  
1419827\_s\_at 0.94979 kinesin family member 17 Kif17  
1419828\_at 1.04896 ubiquitin specific peptidase 31 Usp31  
1419829\_a\_at 0.97709 Growth factor receptor bound protein 2-associated protein 2 Gab2  
1419830\_at 0.84745 --- ---  
1419831\_at 0.92427 expressed sequence AA416453 AA416453  
1419832\_s\_at 0.92168 "acid phosphatase, prostate" AcpP  
1419833\_s\_at 1.19455 "centaurin, delta 3" Centd3  
1419834\_x\_at 1.03064 MAP/microtubule affinity-regulating kinase 1 Mark1  
1419835\_s\_at 0.97366 plectin 1 Plec1  
1419836\_at 0.95401 --- ---  
1419837\_at 1.02771 triggering receptor expressed on myeloid cells-like 2 Trem12  
1419838\_s\_at 0.95988 polo-like kinase 4 (*Drosophila*) Plk4  
1419839\_x\_at 1.02520 PRP19/PSO4 pre-mRNA processing factor 19 homolog (*S. cerevisiae*)  
Prpf19  
1419840\_at 1.12688 keratin 72 Krt72  
1419842\_at 0.94771 Transcribed locus ---  
1419843\_at 0.89313 Calreticulin 4 Calr4  
1419844\_a\_at 1.03236 hypothetical protein LOC545086 LOC545086  
1419845\_at 0.97893 "distal-less homeobox 1, antisense" Dlx1as  
1419846\_at 0.98044 "TAF15 RNA polymerase II, TATA box binding protein (TBP)-associated  
factor" Taf15  
1419847\_at 0.88084 Protein serine kinase H1 Pskh1  
1419848\_x\_at 1.12954 toll-like receptor 7 Tlr7  
1419849\_at 1.09472 Ankyrin repeat domain 44 Ankrd44  
1419851\_at 1.03406 --- ---  
1419853\_a\_at 0.95885 "purinergic receptor P2X, ligand-gated ion channel, 7" P2rx7  
1419857\_at 0.97737 Transcribed locus ---  
1419858\_at 0.82994 Interferon activated gene 203 Ifi203  
1419859\_at 0.94879 Transcribed locus ---  
1419861\_at 0.95617 --- ---  
1419863\_at 0.90808 Tropomodulin 1 Tmod1  
1419864\_x\_at 0.94649 Transcribed locus ---



1419866\_s\_at 1.00764 ataxin 2 Atxn2  
1419867\_a\_at 1.13072 ankyrin repeat and KH domain containing 1 Ankhd1  
1419869\_s\_at 0.92407 high density lipoprotein (HDL) binding protein Hdlbp  
1419871\_at 1.07784 "Protein phosphatase 2 (formerly 2A), regulatory subunit A (PR 65), beta isoform" Ppp2r1b  
1419872\_at 0.65649 colony stimulating factor 1 receptor Csf1r  
1419873\_s\_at 0.79954 colony stimulating factor 1 receptor Csf1r  
1419874\_x\_at 1.01727 zinc finger and BTB domain containing 16 Zbtb16  
1419875\_at 1.07874 Transcribed locus ---  
1419876\_at 0.98605 RIKEN cDNA 2810449G22 gene 2810449G22Rik  
1419877\_x\_at 0.91470 Transcribed locus ---  
1419879\_s\_at 1.06142 tripartite motif protein 25 Trim25  
1419880\_x\_at 0.99290 Transcribed locus ---  
1419881\_x\_at 0.98277 --- ---  
1419882\_at 0.88833 "6-phosphofructo-2-kinase/fructose-2,6-biphosphatase 3" Pfkfb3  
1419883\_s\_at 1.08259 "ATPase, H+ transporting, lysosomal V1 subunit B2" Atp6v1b2  
1419884\_at 1.07242 Ethanolamine kinase 1 Etnk1  
1419885\_at 0.93465 "DNA segment, Chr X, ERATO Doi 223, expressed" DXErtd223e  
1419886\_at 1.58098 "DNA segment, Chr X, ERATO Doi 223, expressed" DXErtd223e  
1419887\_at 0.97460 NudC domain containing 1 Nudcd1  
1419888\_at 1.22880 RIKEN cDNA 1110033M05 gene 1110033M05Rik  
1419889\_at 1.11670 RIKEN cDNA 1110033M05 gene 1110033M05Rik  
1419890\_at 1.04110 --- ---  
1419891\_s\_at 0.86400 expressed sequence C77545 C77545  
1419892\_at 0.92392 RIKEN cDNA 1110021J02 gene 1110021J02Rik  
1419893\_at 0.96729 RIKEN cDNA D930048N14 gene D930048N14Rik  
1419894\_at 0.96189 "Similar to proteasome (prosome, macropain) subunit, beta type 7" MGC107702  
1419895\_at 1.11041 expressed sequence AA536748 AA536748  
1419896\_at 1.10181 expressed sequence BB001228 BB001228  
1419897\_at 1.12614 expressed sequence BB001228 BB001228  
1419898\_s\_at 1.20280 zinc finger CCCH type containing 7 A Zc3h7a  
1419899\_at 0.94831 Zinc finger CCCH type containing 7 A Zc3h7a  
1419900\_at 0.95686 --- ---  
1419901\_at 0.93916 "NOD-derived CD11c +ve dendritic cells cDNA, RIKEN full-length enriched library, clone:F630006H17 product:hypothetical protein, full insert sequence" ---  
1419902\_at 0.99335 "NOD-derived CD11c +ve dendritic cells cDNA, RIKEN full-length enriched library, clone:F630006H17 product:hypothetical protein, full insert sequence" ---  
1419903\_at 0.94488 "Adult male corpora quadrigemina cDNA, RIKEN full-length enriched library, clone:B230215D24 product:unclassifiable, full insert sequence" ---  
1419904\_at 0.89313 "Adult male corpora quadrigemina cDNA, RIKEN full-length enriched library, clone:B230215D24 product:unclassifiable, full insert sequence" ---  
1419905\_s\_at 1.01722 hydroxyprostaglandin dehydrogenase 15 (NAD) Hpgd

|              |         |                                                           |               |
|--------------|---------|-----------------------------------------------------------|---------------|
| 1419906_at   | 0.99380 | Hydroxyprostaglandin dehydrogenase 15 (NAD)               | Hpgd          |
| 1419907_s_at | 1.13910 | Fc receptor-like A                                        | Fcrla         |
| 1419908_at   | 0.99767 | Fc receptor-like A                                        | Fcrla         |
| 1419909_at   | 1.08367 | M-phase phosphoprotein 9                                  | Mphosph9      |
| 1419910_at   | 0.74871 | M-phase phosphoprotein 9                                  | Mphosph9      |
| 1419911_at   | 0.90950 | "Coronin, actin binding protein 1C"                       | Coro1c        |
| 1419912_s_at | 1.01554 | Serine/threonine kinase receptor associated protein       | Strap         |
| 1419913_at   | 1.04027 | Serine/threonine kinase receptor associated protein       | Strap         |
| 1419914_s_at | 1.05992 | "DNA segment, Chr 10, ERATO Doi 438, expressed"           | D10Ertd438e   |
| 1419915_at   | 0.72123 | "DNA segment, Chr 10, ERATO Doi 438, expressed"           | D10Ertd438e   |
| 1419916_at   | 0.87469 | Ring finger protein 20                                    | Rnf20         |
| 1419917_s_at | 0.93150 | transmembrane emp24 protein transport domain containing 7 | Tmed7         |
| 1419918_at   | 0.81393 | transmembrane emp24 protein transport domain containing 7 | Tmed7         |
| 1419919_at   | 0.88010 | RIKEN cDNA 4833422M21 gene                                | 4833422M21Rik |
| 1419920_s_at | 1.08178 | ubiquitin specific peptidase 7                            | Usp7          |
| 1419921_s_at | 0.91947 | Ubiquitin specific peptidase 7                            | Usp7          |
| 1419922_s_at | 0.73120 | attractin like 1                                          | Atrn1         |
| 1419923_at   | 0.89426 | Similar to Zinc finger protein 124 (HZF-16)               | LOC626391     |
| 1419924_at   | 0.90533 | RIKEN cDNA A730024A03 gene                                | A730024A03Rik |
| 1419925_s_at | 0.93965 | ---                                                       | ---           |
| 1419926_at   | 0.86511 | Thioredoxin domain containing 10                          | Txndc10       |
| 1419927_s_at | 1.04745 | RAB interacting factor                                    | Rabif         |
| 1419928_at   | 1.01694 | leucine-rich repeats and immunoglobulin-like domains 1    | Lrig1         |
| 1419929_at   | 1.00773 | "DNA segment, Chr 15, ERATO Doi 55, expressed"            | D15Ertd55e    |
| 1419930_at   | 0.92218 | "DNA segment, Chr 15, ERATO Doi 55, expressed"            | D15Ertd55e    |
| 1419931_at   | 0.97584 | "ATP-binding cassette, sub-family B (MDR/TAP), member 7"  | Abcb7         |
| 1419932_s_at | 1.04278 | ---                                                       | ---           |
| 1419933_at   | 1.02277 | p53 and DNA damage regulated 1                            | Pdrg1         |
| 1419934_at   | 0.95869 | ---                                                       | ---           |
| 1419935_s_at | 0.97136 | "casein kinase 2, alpha prime polypeptide"                | Csnk2a2       |
| 1419936_at   | 0.84347 | "Casein kinase II, alpha 2, polypeptide"                  | Csnk2a2       |
| 1419937_at   | 0.88588 | expressed sequence AA536749                               | AA536749      |
| 1419938_s_at | 0.88559 | Rho guanine nucleotide exchange factor (GEF) 17           | Arhgef17      |
| 1419939_at   | 0.90464 | Rho guanine nucleotide exchange factor (GEF) 17           | Arhgef17      |
| 1419940_at   | 1.19334 | RIKEN cDNA C030018P15 gene                                | C030018P15Rik |
| 1419941_at   | 0.90913 | RIKEN cDNA C030018P15 gene                                | C030018P15Rik |
| 1419942_at   | 1.06424 | Sulfiredoxin 1 homolog (S. cerevisiae)                    | Srxn1         |
| 1419943_s_at | 1.07897 | cyclin B1                                                 | Ccnb1         |
| 1419944_at   | 0.84215 | cyclin B1                                                 | Ccnb1         |
| 1419945_s_at | 0.88444 | "RAB2, member RAS oncogene family"                        | Rab2          |
| 1419946_s_at | 0.85773 | "RAB2, member RAS oncogene family"                        | Rab2          |
| 1419947_at   | 1.02052 | "DNA segment, Chr 4, ERATO Doi 117, expressed"            | D4Ertd117e    |
| 1419948_at   | 1.01839 | "DNA segment, Chr 4, ERATO Doi 117, expressed"            | D4Ertd117e    |

|              |         |                                                                             |               |
|--------------|---------|-----------------------------------------------------------------------------|---------------|
| 1419949_at   | 1.02770 | Transmembrane protein 38B                                                   | Tmem38b       |
| 1419950_s_at | 1.07563 | transportin 3                                                               | Tnpo3         |
| 1419951_at   | 0.98756 | "Lectin, mannose-binding, 1"                                                | Lman1         |
| 1419952_at   | 0.88963 | Syntaxin 5A                                                                 | Stx5a         |
| 1419953_at   | 1.01077 | expressed sequence C80678                                                   | C80678        |
| 1419954_s_at | 0.92201 | "zinc finger, AN1-type domain 3"                                            | Zfand3        |
| 1419955_at   | 0.95422 | "Zinc finger, AN1-type domain 3"                                            | Zfand3        |
| 1419956_at   | 1.08028 | expressed sequence C77144                                                   | C77144        |
| 1419957_at   | 0.94464 | expressed sequence C77144                                                   | C77144        |
| 1419958_at   | 0.94165 | RIKEN cDNA C330003B14 gene                                                  | C330003B14Rik |
| 1419959_s_at | 0.94977 | RIKEN cDNA C330003B14 gene                                                  | C330003B14Rik |
| 1419960_at   | 0.96647 | RIKEN cDNA C330003B14 gene                                                  | C330003B14Rik |
| 1419961_s_at | 1.04358 | RIKEN cDNA C330003B14 gene                                                  | C330003B14Rik |
| 1419962_at   | 1.00224 | Transcribed locus                                                           | ---           |
| 1419963_at   | 0.97374 | DEP domain containing 6                                                     | Depdc6        |
| 1419964_s_at | 1.08251 | hepatoma-derived growth factor                                              | Hdgf          |
| 1419965_at   | 0.94936 | expressed sequence C79445                                                   | C79445        |
| 1419966_at   | 1.03254 | "tubulin, beta 2b"                                                          | Tubb2b        |
| 1419967_at   | 1.09949 | SEH1-like ( <i>S. cerevisiae</i> )                                          | Seh1          |
| 1419968_at   | 0.93570 | expressed sequence C77370                                                   | C77370        |
| 1419969_at   | 1.06658 | expressed sequence C77370                                                   | C77370        |
| 1419970_at   | 0.81119 | "solute carrier family 35, member A5"                                       | Slc35a5       |
| 1419971_s_at | 0.88651 | "solute carrier family 35, member A5"                                       | Slc35a5       |
| 1419972_at   | 0.99876 | "Solute carrier family 35, member A5"                                       | Slc35a5       |
| 1419973_at   | 0.94501 | "3-oxoacyl-ACP synthase, mitochondrial"                                     | Oxsm          |
| 1419974_at   | 0.96614 | "sterol carrier protein 2, liver"                                           | Scp2          |
| 1419975_at   | 0.94180 | ---                                                                         | ---           |
| 1419976_s_at | 0.96925 | "nuclear factor of activated T-cells, cytoplasmic, calcineurin-dependent 3" | Nfatc3        |
| 1419977_s_at | 0.76183 | RNA binding motif protein 35b                                               | Rbm35b        |
| 1419978_s_at | 1.02474 | "DNA segment, Chr 10, ERATO Doi 610, expressed"                             | D10Ertd610e   |
| 1419979_s_at | 0.88685 | cAMP responsive element binding protein 3                                   | Creb3         |
| 1419980_at   | 0.92148 | glucosidase beta 2                                                          | Gba2          |
| 1419981_at   | 0.87590 | RIO kinase 3 (yeast)                                                        | Riok3         |
| 1419982_s_at | 1.00543 | ---                                                                         | ---           |
| 1419983_at   | 0.87522 | zinc finger protein 644                                                     | Zfp644        |
| 1419984_s_at | 0.87491 | zinc finger protein 644                                                     | Zfp644        |
| 1419985_s_at | 0.83916 | coiled-coil domain containing 69                                            | Ccdc69        |
| 1419986_at   | 1.01772 | Coiled-coil domain containing 69                                            | Ccdc69        |
| 1419987_at   | 0.88820 | ---                                                                         | ---           |
| 1419988_at   | 1.00999 | mitogen activated protein kinase kinase kinase 7                            | Map3k7        |
| 1419989_at   | 0.93699 | COMM domain containing 5                                                    | Commd5        |
| 1419990_at   | 1.12054 | RIKEN cDNA A830082K12 gene                                                  | A830082K12Rik |

|              |         |                                                                                                                                                                               |                    |
|--------------|---------|-------------------------------------------------------------------------------------------------------------------------------------------------------------------------------|--------------------|
| 1419991_at   | 0.81344 | RAB3A interacting protein (rabin3)-like 1                                                                                                                                     | Rab3il1            |
| 1419992_x_at | 0.87556 | RAB3A interacting protein (rabin3)-like 1                                                                                                                                     | Rab3il1            |
| 1419993_at   | 0.88531 | RAB3A interacting protein (rabin3)-like 1                                                                                                                                     | Rab3il1            |
| 1419994_s_at | 0.97380 | "DNA segment, Chr 10, ERATO Doi 641, expressed"                                                                                                                               | D10Ertd641e        |
| 1419995_at   | 0.92973 | "DNA segment, Chr 10, ERATO Doi 641, expressed"                                                                                                                               | D10Ertd641e        |
| 1419996_s_at | 0.97840 | aryl hydrocarbon receptor nuclear translocator                                                                                                                                | Arnt               |
| 1419997_at   | 0.96531 | ---                                                                                                                                                                           | ---                |
| 1419998_at   | 0.89880 | Transcribed locus                                                                                                                                                             | ---                |
| 1419999_at   | 1.03305 | immunoglobulin (CD79A) binding protein 1                                                                                                                                      | Igbp1              |
| 1420000_s_at | 1.07629 | immunoglobulin (CD79A) binding protein 1                                                                                                                                      | Igbp1              |
| 1420001_at   | 0.98452 | "DNA segment, Chr 7, ERATO Doi 1, expressed"                                                                                                                                  | D7Ertd1e           |
| 1420002_at   | 1.09302 | "DNA segment, Chr 7, ERATO Doi 1, expressed"                                                                                                                                  | D7Ertd1e           |
| 1420003_at   | 1.03818 | "NOL1/NOP2/Sun domain family, member 5"                                                                                                                                       | Nsun5              |
| 1420004_s_at | 0.97814 | nuclear pore membrane protein 121                                                                                                                                             | Pom121             |
| 1420005_s_at | 0.93487 | bone morphogenetic protein 15                                                                                                                                                 | Bmp15              |
| 1420006_at   | 0.89355 | Bone morphogenetic protein 15                                                                                                                                                 | Bmp15              |
| 1420007_at   | 0.98292 | ---                                                                                                                                                                           | ---                |
| 1420008_s_at | 0.92874 | ---                                                                                                                                                                           | ---                |
| 1420009_at   | 1.00927 | "WW, C2 and coiled-coil domain containing 1"                                                                                                                                  | Wwc1               |
| 1420010_at   | 0.82959 | hypothetical LOC574418                                                                                                                                                        | LOC574418          |
| 1420011_s_at | 0.85972 | X-box binding protein 1                                                                                                                                                       | Xbp1               |
| 1420012_at   | 0.96467 | X-box binding protein 1                                                                                                                                                       | Xbp1               |
| 1420013_s_at | 1.60090 | lanosterol synthase                                                                                                                                                           | Lss                |
| 1420014_at   | 1.09274 | Lanosterol synthase                                                                                                                                                           | Lss                |
| 1420015_s_at | 1.13869 | palmitoyl-protein thioesterase 1                                                                                                                                              | Ppt1               |
| 1420016_at   | 0.86117 | Palmitoyl-protein thioesterase 1                                                                                                                                              | Ppt1               |
| 1420017_at   | 0.97249 | tetraspanin 8                                                                                                                                                                 | Tspan8             |
| 1420018_s_at | 0.94401 | tetraspanin 8                                                                                                                                                                 | Tspan8             |
| 1420019_at   | 0.90182 | Tetraspanin 8                                                                                                                                                                 | Tspan8             |
| 1420020_at   | 0.95185 | suppressor of zeste 12 homolog (Drosophila)                                                                                                                                   | Suz12              |
| 1420021_s_at | 1.05767 | suppressor of zeste 12 homolog (Drosophila)                                                                                                                                   | Suz12              |
| 1420022_s_at | 0.93531 | Suppressor of zeste 12 homolog (Drosophila)                                                                                                                                   | Suz12              |
| 1420023_at   | 1.01304 | eukaryotic translation termination factor 1                                                                                                                                   | Etf1               |
| 1420024_s_at | 1.11670 | eukaryotic translation termination factor 1                                                                                                                                   | Etf1               |
| 1420025_s_at | 1.15374 | hypothetical protein LOC637741                                                                                                                                                | LOC637741          |
| 1420026_at   | 0.88800 | AP2 associated kinase 1                                                                                                                                                       | Aak1               |
| 1420027_at   | 0.93960 | expressed sequence C80171                                                                                                                                                     | C80171             |
| 1420028_s_at | 1.05444 | minichromosome maintenance deficient 3 (S. cerevisiae) /// similar to DNA replication licensing factor MCM3 (DNA polymerase alpha holoenzyme-associated protein P1) (P1-MCM3) | Mcm3 /// LOC671904 |
| 1420029_at   | 0.85627 | Minichromosome maintenance deficient 3 (S. cerevisiae)                                                                                                                        | Mcm3               |
| 1420030_at   | 1.01780 | "DNA segment, Chr 11, ERATO Doi 730, expressed"                                                                                                                               | D11Ertd730e        |
| 1420031_at   | 1.02374 | checkpoint kinase 1 homolog (S. pombe)                                                                                                                                        | Chek1              |

1420032\_at 0.98334 Checkpoint kinase 1 homolog (*S. pombe*) Chek1  
1420033\_s\_at 1.01201 "protein phosphatase 2, regulatory subunit B, delta isoform" Ppp2r2d  
1420034\_at 0.92245 "Protein phosphatase 2, regulatory subunit B, delta isoform" Ppp2r2d  
1420035\_at 1.03288 Aquaporin 6 Aqp6  
1420036\_at 0.93068 Arginine-tRNA-protein transferase 1 Ate1  
1420037\_at 0.88662 "ATP synthase, H<sup>+</sup> transporting, mitochondrial F1 complex, alpha subunit, isoform 1" Atp5a1  
1420038\_at 1.02208 "VATPase, H<sup>+</sup> transporting, lysosomal V1 subunit E1" Atp6v1e1  
1420039\_s\_at 1.03508 chromobox homolog 7 Cbx7  
1420040\_at 0.94295 RIKEN cDNA 5730472N09 gene 5730472N09Rik  
1420041\_at 1.06840 --- ---  
1420042\_at 1.00331 THO complex 1 Thoc1  
1420043\_s\_at 0.87204 THO complex 1 Thoc1  
1420044\_at 0.92950 --- ---  
1420045\_at 1.04590 --- ---  
1420046\_s\_at 0.89142 MAF1 homolog (*S. cerevisiae*) Maf1  
1420047\_at 1.04208 MAF1 homolog (*S. cerevisiae*) Maf1  
1420048\_at 1.04149 --- ---  
1420049\_at 0.89721 expressed sequence C78859 C78859  
1420050\_at 0.98030 Transcribed locus ---  
1420051\_at 1.08036 Transcribed locus ---  
1420052\_x\_at 1.10820 "proteasome (prosome, macropain) subunit, beta type 1" Psmb1  
1420053\_at 0.94000 "Proteasome (prosome, macropain) subunit, beta type 1" Psmb1  
1420054\_s\_at 1.01499 "solute carrier family 35, member C2" Slc35c2  
1420055\_at 0.85445 "solute carrier family 35, member C2" Slc35c2  
1420056\_s\_at 1.36470 phosphatidylserine receptor Ptdsr  
1420057\_at 0.98872 Phosphatidylserine receptor Ptdsr  
1420058\_s\_at 0.91643 RIKEN cDNA 2410166I05 gene 2410166I05Rik  
1420059\_at 0.97948 RIKEN cDNA 2410166I05 gene 2410166I05Rik  
1420060\_s\_at 0.93387 expressed sequence AA675344 AA675344  
1420061\_s\_at 1.06636 expressed sequence AA675344 AA675344  
1420062\_at 1.02867 Transcribed locus ---  
1420063\_at 1.06257 Transcribed locus ---  
1420064\_s\_at 0.86892 transketolase-like 1 Tktl1  
1420065\_at 0.97449 Transketolase-like 1 Tktl1  
1420066\_s\_at 0.96675 CD160 antigen Cd160  
1420067\_at 0.94636 CD160 antigen Cd160  
1420068\_at 1.12576 --- ---  
1420069\_at 0.95136 "PREDICTED: *Mus musculus* hypothetical protein LOC628408 (LOC628408), mRNA" ---  
1420070\_a\_at 0.96217 "solute carrier family 9 (sodium/hydrogen exchanger), member 5" Slc9a5  
1420071\_at 0.94003 "serine (or cysteine) peptidase inhibitor, clade B, member 6e" Serpinb6e  
1420072\_s\_at 1.07598 --- ---

1420073\_s\_at 1.00692 --- ---  
1420074\_at 0.95578 "DNA segment, Chr 8, ERATO Doi 738, expressed" D8Ertd738e  
1420075\_at 1.16418 "ATPase, class I, type 8B, member 1" Atp8b1  
1420076\_at 0.87385 "ATPase, class I, type 8B, member 1" Atp8b1  
1420077\_at 0.95669 expressed sequence AI452102 AI452102  
1420078\_at 0.98487 "Transcribed locus, moderately similar to XP\_218017.3 PREDICTED: similar to putative pheromone receptor [Rattus norvegicus]" ---  
1420079\_at 1.23441 similar to putative pheromone receptor (Go-VN5) /// hypothetical LOC627111 /// similar to putative pheromone receptor (Go-VN5)  
LOC195691 /// LOC224552 /// LOC328759 /// LOC433070 /// LOC627111 /// LOC627367 /// LOC627476 /// LOC637382 /// LOC665253 /// LOC665376 /// LOC670484  
1420080\_a\_at 0.92902 glutamine fructose-6-phosphate transaminase 1 Gfpt1  
1420081\_s\_at 1.06187 "DNA segment, Chr 2, ERATO Doi 750, expressed" D2Ertd750e  
1420082\_at 0.91452 "DNA segment, Chr 2, ERATO Doi 750, expressed" D2Ertd750e  
1420083\_at 0.81857 expressed sequence AU016916 AU016916  
1420084\_at 0.93452 Transcribed locus ---  
1420085\_at 0.89899 fibroblast growth factor 4 Fgf4  
1420086\_x\_at 0.95402 fibroblast growth factor 4 Fgf4  
1420087\_at 1.00328 Frizzled homolog 3 (Drosophila) Fzd3  
1420088\_at 1.36582 "nuclear factor of kappa light chain gene enhancer in B-cells inhibitor, alpha" Nfkbia  
1420089\_at 0.99115 "Nuclear factor of kappa light chain gene enhancer in B-cells inhibitor, alpha" Nfkbia  
1420090\_at 1.05548 --- ---  
1420091\_s\_at 1.01215 microrchidia 3 Morc3  
1420092\_at 0.98161 microrchidia 3 Morc3  
1420093\_s\_at 0.92837 heterogeneous nuclear ribonucleoprotein D-like Hnrpdl  
1420094\_at 0.98235 Heterogeneous nuclear ribonucleoprotein D-like Hnrpdl  
1420095\_s\_at 0.88865 zinc finger proliferation 1 Zipr1  
1420096\_at 0.82397 Zinc finger proliferation 1 Zipr1  
1420097\_at 0.94389 "DNA segment, Chr 13, ERATO Doi 787, expressed" D13Ertd787e  
1420098\_s\_at 1.24434 "DNA segment, Chr 13, ERATO Doi 787, expressed" D13Ertd787e  
1420099\_at 0.91532 "DNA segment, Chr 13, ERATO Doi 787, expressed" D13Ertd787e  
1420100\_s\_at 0.96834 "DNA segment, Chr 13, ERATO Doi 787, expressed" D13Ertd787e  
1420101\_at 0.93736 RIKEN cDNA 2610020H08 gene 2610020H08Rik  
1420102\_at 0.89175 --- ---  
1420103\_at 1.05707 --- ---  
1420104\_at 1.03525 --- ---  
1420105\_at 0.91454 "DNA segment, Chr 13, ERATO Doi 205, expressed" D13Ertd205e

|              |         |                                                                   |               |
|--------------|---------|-------------------------------------------------------------------|---------------|
| 1420106_at   | 0.94696 | "DNA Segment, Chr 9, Mouse Genome Informatics 7"                  | D9Mgi7        |
| 1420107_at   | 0.89763 | Bardet-Biedl syndrome 4 homolog (human) Bbs4                      |               |
| 1420108_at   | 1.14676 | ---                                                               | ---           |
| 1420109_at   | 1.03025 | "Phosphatidylinositol-4-phosphate 5-kinase, type II, alpha"       | Pip5k2a       |
| 1420110_s_at | 0.99616 | zinc finger protein 334 Zfp334                                    |               |
| 1420111_at   | 0.96621 | Zinc finger protein 334 Zfp334                                    |               |
| 1420112_at   | 1.13246 | Phosphofurin acidic cluster sorting protein 1                     | Pacs1         |
| 1420113_s_at | 1.27939 | RIKEN cDNA 2410022L05 gene                                        | 2410022L05Rik |
| 1420114_s_at | 0.91348 | RIKEN cDNA 2410022L05 gene                                        | 2410022L05Rik |
| 1420115_at   | 0.81251 | exosome component 8                                               | Exosc8        |
| 1420116_s_at | 0.97802 | golgi phosphoprotein 3                                            | Golph3        |
| 1420117_at   | 0.80711 | Transcribed locus                                                 | ---           |
| 1420118_s_at | 1.12409 | ---                                                               | ---           |
| 1420119_s_at | 1.13395 | PHD finger protein 3                                              | Phf3          |
| 1420120_at   | 0.87971 | expressed sequence AU020177                                       | AU020177      |
| 1420121_at   | 1.03860 | expressed sequence AA517858                                       | AA517858      |
| 1420122_at   | 0.90200 | expressed sequence AA517858                                       | AA517858      |
| 1420123_at   | 0.90932 | T-cell leukemia translocation altered gene                        | Tcta          |
| 1420124_s_at | 0.91991 | T-cell leukemia translocation altered gene                        | Tcta          |
| 1420125_at   | 1.05342 | T-cell leukemia translocation altered gene                        | Tcta          |
| 1420126_at   | 0.99285 | expressed sequence AA522020                                       | AA522020      |
| 1420127_s_at | 0.88915 | cell cycle progression 1                                          | Ccpg1         |
| 1420128_s_at | 0.86560 | "phosphatidylinositol glycan anchor biosynthesis, class B"        | Pigb          |
| 1420129_s_at | 1.04127 | "DNA segment, Chr 10, Wayne State University 52, expressed"       | D10Wsu52e     |
| 1420130_s_at | 1.00693 | "DNA segment, Chr 10, Wayne State University 52, expressed"       | D10Wsu52e     |
| 1420131_s_at | 1.00135 | pituitary tumor-transforming 1 interacting protein                | Pttg1ip       |
| 1420132_s_at | 1.08212 | Pituitary tumor-transforming 1 interacting protein                | Pttg1ip       |
| 1420133_at   | 0.93123 | hypothetical protein LOC433719                                    | RP23-289L21.1 |
| 1420134_at   | 1.08511 | Hypothetical protein LOC433719                                    | RP23-289L21.1 |
| 1420135_at   | 0.90318 | CDNA sequence BC021438                                            | BC021438      |
| 1420136_a_at | 1.66527 | ---                                                               | ---           |
| 1420137_at   | 1.09727 | ---                                                               | ---           |
| 1420138_at   | 1.07688 | "solute carrier family 19 (sodium/hydrogen exchanger), member 1"  | Slc19a1       |
| 1420139_s_at | 0.99173 | "KRR1, small subunit (SSU) processome component, homolog (yeast)" |               |
|              |         | Krr1                                                              |               |
| 1420140_at   | 1.02996 | "bin3, bicoid-interacting 3, homolog (Drosophila)"                | Bcdin3        |
| 1420141_at   | 1.03562 | expressed sequence AA517023                                       | AA517023      |
| 1420142_s_at | 1.12368 | proliferation-associated 2G4                                      | Pa2g4         |
| 1420143_at   | 1.08273 | membrane associated DNA binding protein                           | Mnab          |
| 1420144_x_at | 0.95469 | membrane associated DNA binding protein                           | Mnab          |
| 1420145_at   | 0.97359 | Transcribed locus                                                 | ---           |
| 1420146_at   | 1.01271 | ---                                                               | ---           |
| 1420147_at   | 1.10036 | expressed sequence AA407331                                       | AA407331      |

|              |         |                                                                             |                             |
|--------------|---------|-----------------------------------------------------------------------------|-----------------------------|
| 1420148_at   | 1.08424 | "solute carrier family 6 (neurotransmitter transporter, taurine), member 6" |                             |
| Slc6a6       |         |                                                                             |                             |
| 1420149_at   | 1.02003 | Pericentrin (kendrin)                                                       | Pcnt                        |
| 1420150_at   | 0.73751 | splA/ryanodine receptor domain and SOCS box containing 1                    | Spsb1                       |
| 1420151_at   | 0.94241 | ---                                                                         | ---                         |
| 1420152_at   | 0.86139 | ---                                                                         | ---                         |
| 1420153_at   | 1.01750 | ---                                                                         | ---                         |
| 1420154_at   | 1.12135 | ---                                                                         | ---                         |
| 1420155_at   | 1.02910 | expressed sequence AA408954                                                 | AA408954                    |
| 1420156_at   | 0.91531 | expressed sequence AA408954                                                 | AA408954                    |
| 1420157_s_at | 1.01904 | "ATP-binding cassette, sub-family F (GCN20), member 1"                      | Abcf1                       |
| 1420158_s_at | 0.97512 | "ATP-binding cassette, sub-family F (GCN20), member 1"                      | Abcf1                       |
| 1420159_at   | 1.32887 | myosin IE                                                                   | Myo1e                       |
| 1420160_s_at | 0.98064 | myosin IE                                                                   | Myo1e                       |
| 1420161_at   | 1.46855 | expressed sequence AA409749                                                 | AA409749                    |
| 1420162_at   | 1.07640 | expressed sequence AA409749                                                 | AA409749                    |
| 1420163_at   | 0.98500 | expressed sequence AA511261                                                 | AA511261                    |
| 1420164_at   | 1.12157 | "DNA segment, Chr 7, ERATO Doi 183, expressed"                              | D7Ertd183e                  |
| 1420165_s_at | 1.15450 | "DnaJ (Hsp40) homolog, subfamily C, member 17"                              | Dnajc17                     |
| 1420166_at   | 0.93785 | "Deoxynucleotidyltransferase, terminal"                                     | Dntt                        |
| 1420167_at   | 1.05574 | ---                                                                         | ---                         |
| 1420168_at   | 1.01222 | expressed sequence AA517841                                                 | AA517841                    |
| 1420169_at   | 1.08563 | expressed sequence AA517841                                                 | AA517841                    |
| 1420170_at   | 0.83862 | "myosin, heavy polypeptide 9, non-muscle"                                   | Myh9                        |
| 1420171_s_at | 0.91246 | "myosin, heavy polypeptide 9, non-muscle"                                   | Myh9                        |
| 1420172_at   | 0.87110 | "Myosin, heavy polypeptide 9, non-muscle"                                   | Myh9                        |
| 1420173_at   | 1.00623 | "DNA segment, Chr 11, ERATO Doi 326, expressed"                             | D11Ertd326e                 |
| 1420174_s_at | 0.94169 | ---                                                                         | ---                         |
| 1420175_at   | 0.81568 | Tax1 (human T-cell leukemia virus type I) binding protein 1                 | Tax1bp1                     |
| 1420176_x_at | 0.99074 | immunoglobulin lambda-like polypeptide 1                                    | Igl11                       |
| 1420177_at   | 0.97226 | immunoglobulin lambda-like polypeptide 1                                    | Igl11                       |
| 1420178_at   | 1.13172 | Transcribed locus                                                           | ---                         |
| 1420179_at   | 0.99492 | dolichyl-di-phosphooligosaccharide-protein glycotransferase                 | Ddost                       |
| 1420180_at   | 1.00116 | ---                                                                         | ---                         |
| 1420181_at   | 0.94182 | RIKEN cDNA 1700011M02 gene /// hypothetical protein LOC668339               | 1700011M02Rik /// LOC668339 |
| 1420182_x_at | 0.85111 | doublesex and mab-3 related transcription factor 3                          | Dmrt3                       |
| 1420183_at   | 0.90491 | Loricrin                                                                    | Lor                         |
| 1420184_at   | 0.97067 | ---                                                                         | ---                         |
| 1420185_at   | 0.90819 | "synovial sarcoma, X breakpoint 2 interacting protein"                      | Ssx2ip                      |
| 1420186_at   | 0.93984 | ---                                                                         | ---                         |
| 1420187_at   | 0.91264 | expressed sequence C76628                                                   | C76628                      |
| 1420188_at   | 1.03882 | synaptotagmin VI                                                            | Syt6                        |



|              |         |                                                                  |               |  |
|--------------|---------|------------------------------------------------------------------|---------------|--|
| 1420189_at   | 0.89771 | ---                                                              | ---           |  |
| 1420190_at   | 1.03531 | ---                                                              | ---           |  |
| 1420191_s_at | 1.18310 | "DNA segment, Chr 16, Brigham & Women's Genetics 1494 expressed" |               |  |
| D16Bwg1494e  |         |                                                                  |               |  |
| 1420192_at   | 0.91652 | "DNA segment, Chr 16, Brigham & Women's Genetics 1494 expressed" |               |  |
| D16Bwg1494e  |         |                                                                  |               |  |
| 1420193_at   | 1.02601 | keratin 17                                                       | Krt17         |  |
| 1420194_at   | 1.01047 | ---                                                              | ---           |  |
| 1420195_at   | 0.98818 | ---                                                              | ---           |  |
| 1420196_s_at | 0.91282 | "TBC1 domain family, member 14" Tbc1d14                          |               |  |
| 1420197_at   | 0.90791 | Growth arrest and DNA-damage-inducible 45 beta                   | Gadd45b       |  |
| 1420198_at   | 0.89024 | ---                                                              | ---           |  |
| 1420199_at   | 1.00080 | "Solute carrier family 35, member A4" Slc35a4                    |               |  |
| 1420200_at   | 1.02890 | ---                                                              | ---           |  |
| 1420201_at   | 0.95321 | ---                                                              | ---           |  |
| 1420202_at   | 0.98571 | ---                                                              | ---           |  |
| 1420203_at   | 0.93582 | ---                                                              | ---           |  |
| 1420204_at   | 1.07885 | ---                                                              | ---           |  |
| 1420205_at   | 0.89013 | ---                                                              | ---           |  |
| 1420206_at   | 0.94963 | ---                                                              | ---           |  |
| 1420207_at   | 0.96003 | ---                                                              | ---           |  |
| 1420208_at   | 1.04141 | ---                                                              | ---           |  |
| 1420209_at   | 0.98768 | Dihydrouridine synthase 4-like ( <i>S. cerevisiae</i> )          | Dus4l         |  |
| 1420210_at   | 0.94665 | Expressed sequence AV344025                                      | AV344025      |  |
| 1420211_at   | 1.03277 | ---                                                              | ---           |  |
| 1420212_at   | 0.92199 | ---                                                              | ---           |  |
| 1420213_x_at | 0.94801 | ---                                                              | ---           |  |
| 1420214_at   | 0.99608 | RIKEN cDNA 1810012K16 gene                                       | 1810012K16Rik |  |
| 1420215_x_at | 0.97794 | RIKEN cDNA 1810012K16 gene                                       | 1810012K16Rik |  |
| 1420216_at   | 0.86167 | RIKEN cDNA 1810012K16 gene                                       | 1810012K16Rik |  |
| 1420217_x_at | 0.78395 | ---                                                              | ---           |  |
| 1420218_at   | 0.91024 | ---                                                              | ---           |  |
| 1420219_at   | 0.93402 | RIKEN cDNA 4930461P20 gene                                       | 4930461P20Rik |  |
| 1420220_x_at | 0.98146 | RIKEN cDNA 4930461P20 gene                                       | 4930461P20Rik |  |
| 1420221_at   | 0.87244 | RIKEN cDNA 4930461P20 gene                                       | 4930461P20Rik |  |
| 1420222_at   | 1.04423 | ---                                                              | ---           |  |
| 1420223_at   | 0.86382 | ---                                                              | ---           |  |
| 1420224_at   | 0.93837 | ---                                                              | ---           |  |
| 1420225_at   | 0.90385 | ---                                                              | ---           |  |
| 1420226_x_at | 1.00123 | homeo box A4                                                     | Hoxa4         |  |
| 1420227_at   | 1.01657 | Transcribed locus                                                | ---           |  |
| 1420228_at   | 0.93395 | ---                                                              | ---           |  |
| 1420229_at   | 0.99671 | ---                                                              | ---           |  |

|              |         |                                                                                          |                      |
|--------------|---------|------------------------------------------------------------------------------------------|----------------------|
| 1420230_at   | 1.08817 | expressed sequence AA414993                                                              | AA414993             |
| 1420231_at   | 0.92222 | ---                                                                                      | ---                  |
| 1420232_at   | 0.90943 | ---                                                                                      | ---                  |
| 1420233_at   | 1.02457 | ---                                                                                      | ---                  |
| 1420234_at   | 0.96157 | ---                                                                                      | ---                  |
| 1420235_at   | 0.98319 | "biphenyl hydrolase-like (serine hydrolase, breast epithelial mucin-associated antigen)" | Bphl                 |
| 1420236_at   | 1.16319 | Transcribed locus                                                                        | ---                  |
| 1420237_at   | 1.06096 | Transcribed locus                                                                        | ---                  |
| 1420238_at   | 1.10002 | ---                                                                                      | ---                  |
| 1420239_x_at | 0.89529 | membrane-associated ring finger (C3HC4) 2                                                | 2-Mar                |
| 1420240_at   | 0.89307 | ---                                                                                      | ---                  |
| 1420241_at   | 0.95055 | ---                                                                                      | ---                  |
| 1420242_at   | 1.00550 | ---                                                                                      | ---                  |
| 1420243_at   | 0.90599 | zinc finger homeobox 1a                                                                  | Zfx1a                |
| 1420244_at   | 1.17678 | ---                                                                                      | ---                  |
| 1420245_x_at | 1.11963 | transgelin 2 /// similar to transgelin 2                                                 | Tagln2 /// LOC672466 |
| 1420246_at   | 1.14822 | "DNA segment, Chr 1, ERATO Doi 161, expressed"                                           | D1Ertd161e           |
| 1420247_at   | 0.93662 | "galactosidase, beta 1-like"                                                             | Glb1l                |
| 1420248_at   | 1.00649 | "tubulin, gamma 2"                                                                       | Tubg2                |
| 1420249_s_at | 1.09542 | chemokine (C-C motif) ligand 6                                                           | Ccl6                 |
| 1420250_at   | 0.87582 | ---                                                                                      | ---                  |
| 1420251_at   | 0.96476 | ---                                                                                      | ---                  |
| 1420252_at   | 1.09318 | ---                                                                                      | ---                  |
| 1420253_at   | 0.87218 | "DNA segment, Chr 2, ERATO Doi 63, expressed"                                            | D2Ertd63e            |
| 1420254_at   | 0.96493 | ---                                                                                      | ---                  |
| 1420255_at   | 1.06543 | ---                                                                                      | ---                  |
| 1420256_x_at | 1.01662 | Peripherin 1                                                                             | Prph1                |
| 1420257_at   | 1.01457 | RIKEN cDNA 1700073E17 gene                                                               | 1700073E17Rik        |
| 1420258_at   | 0.96519 | RIKEN cDNA 1700073E17 gene                                                               | 1700073E17Rik        |
| 1420259_at   | 1.04027 | Plakophilin 2                                                                            | Pkp2                 |
| 1420260_at   | 0.99743 | PHD finger protein 7                                                                     | Phf7                 |
| 1420261_at   | 0.99926 | presenilin 1                                                                             | Psen1                |
| 1420262_at   | 0.89663 | ---                                                                                      | ---                  |
| 1420263_at   | 0.98605 | ---                                                                                      | ---                  |
| 1420264_at   | 1.06758 | ---                                                                                      | ---                  |
| 1420265_x_at | 0.98681 | component of oligomeric golgi complex 8                                                  | Cog8                 |
| 1420266_at   | 0.98141 | ---                                                                                      | ---                  |
| 1420267_at   | 0.85386 | Nucleophosmin 1                                                                          | Npm1                 |
| 1420268_x_at | 0.93410 | Nucleophosmin 1                                                                          | Npm1                 |
| 1420269_at   | 1.01320 | Nucleophosmin 1                                                                          | Npm1                 |
| 1420270_at   | 0.97505 | ---                                                                                      | ---                  |
| 1420271_at   | 1.02383 | "3 days neonate thymus cDNA, RIKEN full-length enriched library, clone:                  |                      |

A630030O14 product:unclassifiable, full insert sequence" ---

|              |         |                                                                                                                                   |           |  |
|--------------|---------|-----------------------------------------------------------------------------------------------------------------------------------|-----------|--|
| 1420272_at   | 0.84483 | ---                                                                                                                               | ---       |  |
| 1420273_x_at | 0.84759 | ---                                                                                                                               | ---       |  |
| 1420274_at   | 1.01324 | "transporter 1, ATP-binding cassette, sub-family B (MDR/TAP)"                                                                     | Tap1      |  |
| 1420275_at   | 1.08449 | ---                                                                                                                               | ---       |  |
| 1420276_x_at | 0.89826 | ---                                                                                                                               | ---       |  |
| 1420277_at   | 1.12590 | ---                                                                                                                               | ---       |  |
| 1420278_at   | 0.90485 | cDNA sequence BC048599                                                                                                            | BC048599  |  |
| 1420279_at   | 1.03753 | CDNA sequence BC048599                                                                                                            | BC048599  |  |
| 1420280_x_at | 1.02797 | "procollagen, type IX, alpha 3"                                                                                                   | Col9a3    |  |
| 1420281_at   | 0.88037 | ---                                                                                                                               | ---       |  |
| 1420282_s_at | 1.00624 | "protease, serine, 29"                                                                                                            | Prss29    |  |
| 1420283_at   | 1.03008 | ---                                                                                                                               | ---       |  |
| 1420284_at   | 0.93983 | HLA-B associated transcript 4                                                                                                     | Bat4      |  |
| 1420285_at   | 0.90045 | ---                                                                                                                               | ---       |  |
| 1420286_at   | 0.85547 | Transcribed locus                                                                                                                 | ---       |  |
| 1420287_at   | 0.93748 | Transcribed locus                                                                                                                 | ---       |  |
| 1420288_at   | 0.90800 | expressed sequence T25656                                                                                                         | T25656    |  |
| 1420289_at   | 0.91653 | expressed sequence T25656                                                                                                         | T25656    |  |
| 1420290_at   | 0.94318 | Transcribed locus                                                                                                                 | ---       |  |
| 1420291_at   | 1.04469 | ---                                                                                                                               | ---       |  |
| 1420292_x_at | 0.99919 | ---                                                                                                                               | ---       |  |
| 1420293_at   | 0.84774 | acyltransferase like 2                                                                                                            | Aytl2     |  |
| 1420294_at   | 0.88760 | Acytransferase like 2                                                                                                             | Aytl2     |  |
| 1420295_x_at | 1.06168 | chloride channel 5                                                                                                                | Clcn5     |  |
| 1420296_at   | 0.88080 | chloride channel 5                                                                                                                | Clcn5     |  |
| 1420297_at   | 1.04971 | ---                                                                                                                               | ---       |  |
| 1420298_at   | 0.95666 | ---                                                                                                                               | ---       |  |
| 1420299_at   | 0.99250 | "gamma-aminobutyric acid (GABA-A) receptor, subunit alpha 2"                                                                      | Gabra2    |  |
| 1420300_at   | 1.10506 | ---                                                                                                                               | ---       |  |
| 1420301_at   | 0.99989 | expressed sequence AA414903                                                                                                       | AA414903  |  |
| 1420302_at   | 0.81649 | expressed sequence AA414903                                                                                                       | AA414903  |  |
| 1420303_x_at | 0.93743 | "Transcribed locus, strongly similar to XP_537399.1 PREDICTED: similar to 40S ribosomal protein S4, X isoform [Canis familiaris]" | ---       |  |
| 1420304_x_at | 0.98462 | "Transcribed locus, strongly similar to XP_537399.1 PREDICTED: similar to 40S ribosomal protein S4, X isoform [Canis familiaris]" | ---       |  |
| 1420305_at   | 0.94941 | Transcribed locus                                                                                                                 | ---       |  |
| 1420307_a_at | 1.02041 | "phosphatidylinositol transfer protein, beta"                                                                                     | Pitpnb    |  |
| 1420310_at   | 1.45167 | ---                                                                                                                               | ---       |  |
| 1420311_s_at | 0.92474 | ---                                                                                                                               | ---       |  |
| 1420312_s_at | 1.06280 | ---                                                                                                                               | ---       |  |
| 1420313_x_at | 1.05151 | ---                                                                                                                               | ---       |  |
| 1420318_at   | 0.99737 | Similar to zinc finger protein 709                                                                                                | LOC626877 |  |

|              |         |                                                                                                          |                              |
|--------------|---------|----------------------------------------------------------------------------------------------------------|------------------------------|
| 1420321_at   | 1.09890 | Radical S-adenosyl methionine domain containing 1                                                        | Rsad1                        |
| 1420325_at   | 1.09913 | "Crm, cramped-like (Drosophila)"                                                                         | Cramp11                      |
| 1420326_s_at | 0.98791 | "Crm, cramped-like (Drosophila)"                                                                         | Cramp11                      |
| 1420328_at   | 1.30438 | RIKEN cDNA 2210417D09 gene                                                                               | 2210417D09Rik                |
| 1420329_at   | 0.89315 | RIKEN cDNA 4930455C21 gene                                                                               | 4930455C21Rik                |
| 1420330_at   | 0.88639 | "C-type lectin domain family 4, member e"                                                                | Clec4e                       |
| 1420331_at   | 1.06359 | "C-type lectin domain family 4, member e"                                                                | Clec4e                       |
| 1420332_x_at | 0.98623 | small proline rich-like 7                                                                                | Sprrl7                       |
| 1420333_at   | 1.02819 | thioredoxin domain containing 8                                                                          | Txndc8                       |
| 1420334_at   | 1.02789 | "solute carrier family 12 (potassium/chloride transporters), member 8"                                   | Slc12a8                      |
| 1420335_at   | 0.99580 | disrupted meiotic cDNA 1 homolog                                                                         | Dmc1h                        |
| 1420336_at   | 1.00757 | ADAMTS-like 5                                                                                            | Adamts15                     |
| 1420337_at   | 0.90533 | gastrulation brain homeobox 2                                                                            | Gbx2                         |
| 1420338_at   | 1.04427 | arachidonate 15-lipoxygenase                                                                             | Alox15                       |
| 1420339_at   | 0.98671 | RIKEN cDNA 0610016J10 gene                                                                               | 0610016J10Rik                |
| 1420340_at   | 1.03687 | RIKEN cDNA 4930413O22 gene                                                                               | 4930413O22Rik                |
| 1420341_at   | 0.93387 | transmembrane and coiled-coil domains 5                                                                  | Tmco5                        |
| 1420342_at   | 2.50815 | ganglioside-induced differentiation-associated-protein 10                                                | Gdap10                       |
| 1420343_at   | 0.98285 | granzyme D                                                                                               | Gzmd                         |
| 1420344_x_at | 0.99664 | granzyme D                                                                                               | Gzmd                         |
| 1420345_at   | 0.89090 | claudin 14                                                                                               | Cldn14                       |
| 1420346_at   | 0.97092 | ankyrin repeat and SOCS box-containing protein 12                                                        | Asb12                        |
| 1420347_at   | 1.01876 | "palate, lung, and nasal epithelium carcinoma associated"                                                | Plunc                        |
| 1420348_at   | 0.98061 | LIM homeobox protein 5                                                                                   | Lhx5                         |
| 1420349_at   | 0.86281 | prostaglandin F receptor                                                                                 | Ptgfr                        |
| 1420350_at   | 1.07795 | small proline rich-like 2                                                                                | Sprrl2                       |
| 1420351_at   | 1.08180 | "tumor necrosis factor receptor superfamily, member 4"                                                   | Tnfrsf4                      |
| 1420352_at   | 1.04732 | "protease, serine, 22"                                                                                   | Prss22                       |
| 1420353_at   | 0.96656 | lymphotoxin A                                                                                            | Lta                          |
| 1420354_at   | 1.05631 | cyclin M1                                                                                                | Cnm1                         |
| 1420355_at   | 0.89985 | "G protein-coupled receptor kinase 2, groucho gene related (Drosophila)"                                 | Gprk21                       |
| 1420356_at   | 1.00040 | ninjurin 2                                                                                               | Ninj2                        |
| 1420357_s_at | 0.83469 | X-linked lymphocyte-regulated 3A /// X-linked lymphocyte-regulated 3B /// hypothetical protein LOC574437 | Xlr3a /// Xlr3b /// MGC76689 |
| 1420358_at   | 0.96731 | keratin associated protein 13                                                                            | Krtap13                      |
| 1420359_at   | 1.03918 | seminal vesicle antigen Sva                                                                              |                              |
| 1420360_at   | 1.04597 | dickkopf homolog 1 (Xenopus laevis)                                                                      | Dkk1                         |
| 1420361_at   | 1.25263 | "solute carrier family 11 (proton-coupled divalent metal ion transporters), member 1"                    | Slc11a1                      |
| 1420362_a_at | 0.99536 | Bcl2-interacting killer                                                                                  | Bik                          |
| 1420363_at   | 0.95889 | Bcl2-interacting killer                                                                                  | Bik                          |
| 1420364_at   | 0.97669 | G protein-coupled receptor 87                                                                            | Gpr87                        |

1420365\_a\_at 1.04234 heterogeneous nuclear ribonucleoprotein A2/B1 Hnrpa2b1  
1420366\_at 0.94171 sperm equatorial segment protein 1 Spesp1  
1420367\_at 0.88797 density-regulated protein Denr  
1420368\_at 1.14003 density-regulated protein Denr  
1420369\_a\_at 0.97767 casein beta Csn2  
1420370\_s\_at 0.97146 casein beta Csn2  
1420371\_at 0.95951 "syntrophin, basic 2" Sntb2  
1420372\_at 1.10294 "syntrophin, basic 2" Sntb2  
1420373\_at 0.80352 forkhead box J2 Foxj2  
1420374\_at 0.71465 forkhead box J2 Foxj2  
1420375\_at 0.97456 kinesin family member 3A Kif3a  
1420376\_a\_at 0.93936 "H3 histone, family 3B" H3f3b  
1420377\_at 0.86930 "ST8 alpha-N-acetyl-neuraminide alpha-2,8-sialyltransferase 2" St8sia2  
1420378\_at 1.20170 surfactant associated protein D Sftpd  
1420379\_at 0.86858 "solute carrier organic anion transporter family, member 1a1" Slco1a1  
1420380\_at 3.37928 chemokine (C-C motif) ligand 2 Ccl2  
1420381\_a\_at 1.04070 ribosomal protein L31 Rpl31  
1420382\_at 0.90697 apolipoprotein B48 receptor Apob48r  
1420383\_a\_at 1.08436 "procollagen, type IV, alpha 3 (Goodpasture antigen) binding protein"  
Col4a3bp  
1420384\_at 0.98492 "procollagen, type IV, alpha 3 (Goodpasture antigen) binding protein"  
Col4a3bp  
1420385\_at 0.95050 "guanine nucleotide binding protein, alpha 14" Gna14  
1420386\_at 1.00354 SEH1-like (S. cerevisiae) Seh1  
1420387\_at 1.07385 "Mpv17 transgene, kidney disease mutant" Mpv17  
1420388\_at 1.09072 "protease, serine, 12 neurotrypsin (motopsin)" Prss12  
1420389\_at 1.03723 paired box gene 3 Pax3  
1420390\_s\_at 0.88978 zinc finger protein 354A Zfp354a  
1420391\_at 0.79757 par-3 (partitioning defective 3) homolog (C. elegans) Pard3  
1420392\_at 1.04617 ubiquitin-like 4B Ubl4b  
1420393\_at 1.08462 "nitric oxide synthase 2, inducible, macrophage" Nos2  
1420394\_s\_at 1.07614 "glycoprotein 49 A /// leukocyte immunoglobulin-like receptor, subfamily B,  
member 4" Gp49a /// Lilrb4  
1420395\_a\_at 0.87540 kinesin family member 9 Kif9  
1420396\_at 0.94075 CD160 antigen Cd160  
1420397\_a\_at 0.96605 "SPEN homolog, transcriptional regulator (Drosophila)" Spen  
1420398\_at 0.98838 regulator of G-protein signaling 18 Rgs18  
1420399\_at 0.84005 growth factor independent 1B Gfi1b  
1420400\_at 0.99386 seminal vesicle antigen-like 1 Sval1  
1420401\_a\_at 1.03308 receptor (calcitonin) activity modifying protein 3 Ramp3  
1420402\_at 0.92088 "ATPase, Ca++ transporting, plasma membrane 2" Atp2b2  
1420403\_at 1.00652 "ATPase, Ca++ transporting, plasma membrane 2" Atp2b2  
1420404\_at 1.01450 CD86 antigen Cd86

1420405\_at 0.95897 "solute carrier organic anion transporter family, member 1a4" Slco1a4  
 1420406\_at 0.90279 paternally expressed 12 Peg12  
 1420407\_at 0.99266 leukotriene B4 receptor 1 Ltb4r1  
 1420408\_a\_at 0.88645 "ATP-binding cassette, sub-family C (CFTR/MRP), member 9" Abcc9  
 1420409\_at 0.95454 keratin 35 Krt35  
 1420410\_at 0.93761 "nuclear receptor subfamily 5, group A, member 2" Nr5a2  
 1420411\_a\_at 1.15354 phosphatidylinositol 4-kinase type 2 beta Pi4k2b  
 1420412\_at 0.99105 "tumor necrosis factor (ligand) superfamily, member 10" Tnfsf10  
 1420413\_at 1.19021 "solute carrier family 7 (cationic amino acid transporter, y+ system), member 11" Slc7a11  
 1420414\_at 1.11022 homeo box A11 Hoxa11  
 1420415\_at 0.84210 cDNA sequence AY026312 AY026312  
 1420416\_at 0.63470 "sema domain, immunoglobulin domain (Ig), short basic domain, secreted, (semaphorin) 3A" Sema3a  
 1420417\_at 0.97239 "sema domain, immunoglobulin domain (Ig), short basic domain, secreted, (semaphorin) 3A" Sema3a  
 1420418\_at 1.12596 synaptotagmin II Syt2  
 1420419\_a\_at 1.00557 otoferlin Otof  
 1420420\_at 1.00274 "hydroxyacid oxidase 1, liver" Hao1  
 1420421\_s\_at 1.11944 killer cell lectin-like receptor subfamily B member 1B Klrb1b  
 1420422\_at 0.88968 protocadherin beta 21 Pcdhb21  
 1420423\_at 1.00076 "T-cell leukemia/lymphoma 1B, 4" Tcl1b4  
 1420424\_at 0.96318 RIKEN cDNA 1700054O13 gene 1700054O13Rik  
 1420425\_at 0.92673 "PR domain containing 1, with ZNF domain" Prdm1  
 1420426\_at 0.85849 myosin VIIb Myo7b  
 1420427\_a\_at 0.82497 DEAH (Asp-Glu-Ala-His) box polypeptide 32 Dhx32  
 1420428\_at 0.79236 advanced glycosylation end product-specific receptor Ager  
 1420429\_at 0.91971 protocadherin beta 3 Pcdhb3  
 1420430\_a\_at 0.94092 RIKEN cDNA 2510048L02 gene 2510048L02Rik  
 1420431\_at 0.95728 repetin Rptn  
 1420432\_at 1.01981 "taste receptor, type 1, member 1" Tas1r1  
 1420433\_at 0.96881 "TAF7-like RNA polymerase II, TATA box binding protein (TBP)-associated factor" Taf7l  
 1420434\_at 0.92093 claudin 16 Cldn16  
 1420435\_at 1.05983 RIKEN cDNA 1700011A15 gene 1700011A15Rik  
 1420436\_x\_at 1.04850 testis expressed gene 21 Tex21  
 1420437\_at 1.19248 "indoleamine-pyrrole 2,3 dioxygenase" Indo  
 1420438\_at 1.07593 orosomucoid 2 Orm2  
 1420439\_at 0.99237 testis specific X-linked gene Tsx  
 1420440\_at 0.92880 pancreatic polypeptide Ppy  
 1420441\_at 1.03431 centromere protein C1 Cenpc1  
 1420442\_at 1.06770 "calcium channel, voltage-dependent, L type, alpha 1S subunit" Cacna1s  
 1420443\_at 0.87509 protocadherin beta 19 Pcdhb19

1420444\_at 0.92996 "solute carrier family 22 (organic cation transporter), member 3" Slc22a3  
 1420445\_at 0.93910 "solute carrier family 16 (monocarboxylic acid transporters), member 8" Slc16a8  
 1420446\_at 0.95814 outer dense fiber of sperm tails 3 Odf3  
 1420447\_at 1.11325 "sulfotransferase family 1E, member 1" Sult1e1  
 1420448\_at 1.17667 reproductive homeobox 2 Rhox2  
 1420449\_at 1.03951 RIKEN cDNA A230048G03 gene A230048G03Rik  
 1420450\_at 0.94298 matrix metalloproteinase 10 Mmp10  
 1420451\_at 1.08313 "amiloride-sensitive cation channel 5, intestinal" Accn5  
 1420452\_at 0.94372 keratin associated protein 5-2 Krtap5-2  
 1420453\_at 1.03144 "crystallin, gamma S" Crygs  
 1420454\_at 1.26259 retinoic acid induced 1 Rai1  
 1420455\_at 1.11291 glial cells missing homolog 2 (Drosophila) Gcm2  
 1420456\_at 1.05953 glial cells missing homolog 2 (Drosophila) Gcm2  
 1420457\_at 1.06371 "dishevelled 3, dsh homolog (Drosophila)" Dvl3  
 1420458\_at 1.06365 tachykinin 4 Tac4  
 1420459\_at 1.05290 Down syndrome critical region homolog 6 (human) Dscr6  
 1420460\_a\_at 0.90373 peroxisomal biogenesis factor 11b Pex11b  
 1420461\_at 0.84347 macrophage stimulating 1 receptor (c-met-related tyrosine kinase) Mst1r  
 1420462\_at 0.97978 interleukin 1 receptor accessory protein-like 2 Il1rapl2  
 1420463\_at 1.06527 cytokine-dependent hematopoietic cell linker Clnk  
 1420464\_s\_at 1.00794 "paired-Ig-like receptor A1 /// paired-Ig-like receptor A11 /// paired-Ig-like  
 receptor A2 /// paired-Ig-like receptor A3 /// paired-Ig-like receptor A4 /// paired-Ig-like receptor A6 ///  
 leukocyte immunoglobulin-like receptor, subfamily B (with TM and ITIM domains), member 3 ///  
 hypothetical LOC619608 /// similar to paired-Ig-like receptor A11 /// similar to paired-Ig-like receptor  
 A11 /// similar to paired-Ig-like receptor A1" Pira1 /// Pira11 /// Pira2 /// Pira3 /// Pira4 /// Pira6 ///  
 Lilrb3 /// LOC619608 /// LOC669449 /// LOC669458 /// LOC675749  
 1420465\_s\_at 1.01288 major urinary protein 1 /// major urinary protein 2 Mup1 /// Mup2  
 1420466\_at 0.92473 salivary protein 2 Spt2  
 1420467\_at 1.01554 psoriasis susceptibility 1 candidate 2 (human) Psors1c2  
 1420468\_at 0.99694 ankyrin repeat and SOCS box-containing protein 17 Asb17  
 1420469\_at 0.97295 RIKEN cDNA 4933411G06 gene 4933411G06Rik  
 1420470\_at 1.05694 "sulfotransferase family, cytosolic, 1C, member 1" Sult1c1  
 1420471\_at 0.88311 hypocretin Hcrt  
 1420472\_at 1.01089 myotrophin Mtpn  
 1420473\_at 1.00011 myotrophin Mtpn  
 1420474\_at 1.06860 myotrophin Mtpn  
 1420475\_at 0.97677 myotrophin Mtpn  
 1420476\_a\_at 1.07790 nucleosome assembly protein 1-like 1 Nap111  
 1420477\_at 1.14491 nucleosome assembly protein 1-like 1 Nap111  
 1420478\_at 1.02867 nucleosome assembly protein 1-like 1 Nap111  
 1420479\_a\_at 1.04303 nucleosome assembly protein 1-like 1 Nap111  
 1420480\_at 0.78010 cyclin M3 Cnm3  
 1420481\_at 0.81343 cyclin M3 Cnm3

|              |                                                                                                             |               |
|--------------|-------------------------------------------------------------------------------------------------------------|---------------|
| 1420482_at   | 0.94063 cyclin M3                                                                                           | Cnm3          |
| 1420483_at   | 1.08422 cyclin M3                                                                                           | Cnm3          |
| 1420484_a_at | 1.01275 vitronectin                                                                                         | Vtn           |
| 1420485_at   | 1.08574 nucleolar protein 7                                                                                 | Nol7          |
| 1420486_at   | 1.14809 nucleolar protein 7                                                                                 | Nol7          |
| 1420487_at   | 0.94462 nucleolar protein 7                                                                                 | Nol7          |
| 1420488_at   | 0.98406 mitochondrial ribosomal protein S14                                                                 | Mrps14        |
| 1420489_at   | 1.00408 mitochondrial ribosomal protein S14                                                                 | Mrps14        |
| 1420490_at   | 0.94569 kallikrein 1-related peptidase b16                                                                  | Klk1b16       |
| 1420491_at   | 1.11603 "eukaryotic translation initiation factor 2, subunit 1 alpha"                                       | Eif2s1        |
| 1420492_s_at | 0.90651 submaxillary gland androgen regulated protein 1 /// submaxillary gland androgen regulated protein 3 | Smr1 /// Smr3 |
| 1420493_a_at | 1.24317 "phosphate cytidyltransferase 2, ethanolamine"                                                      | Pcyt2         |
| 1420494_x_at | 0.94185 ubiquitin C                                                                                         | Ubc           |
| 1420495_a_at | 1.03822 vacuolar protein sorting 26 homolog A (yeast)                                                       | Vps26a        |
| 1420496_at   | 0.96343 coagulation factor XII (Hageman factor) F12                                                         |               |
| 1420497_a_at | 1.05058 CCAAT/enhancer binding protein zeta                                                                 | Cebpz         |
| 1420498_a_at | 0.91474 disabled homolog 2 (Drosophila) Dab2                                                                |               |
| 1420499_at   | 0.96353 GTP cyclohydrolase 1                                                                                | Gch1          |
| 1420500_at   | 0.98699 "DnaJ (Hsp40) homolog, subfamily C, member 1"                                                       | Dnajc1        |
| 1420501_at   | 0.94136 "DnaJ (Hsp40) homolog, subfamily C, member 1"                                                       | Dnajc1        |
| 1420502_at   | 1.03779 spermidine/spermine N1-acetyl transferase 1                                                         | Sat1          |
| 1420503_at   | 1.00668 "solute carrier family 6 (neurotransmitter transporter), member 14"                                 | Slc6a14       |
| 1420504_at   | 0.95744 "solute carrier family 6 (neurotransmitter transporter), member 14"                                 | Slc6a14       |
| 1420505_a_at | 1.14599 syntaxin binding protein 1                                                                          | Stxbp1        |
| 1420506_a_at | 1.02031 syntaxin binding protein 1                                                                          | Stxbp1        |
| 1420507_a_at | 0.83509 RIKEN cDNA 3110031B13 gene                                                                          | 3110031B13Rik |
| 1420508_at   | 0.88627 "sema domain, immunoglobulin domain (Ig), short basic domain, secreted, (semaphorin) 3 F"           | Sema3f        |
| 1420509_at   | 1.02833 serum response factor binding protein 1                                                             | Srfbp1        |
| 1420510_at   | 1.08121 --- ---                                                                                             |               |
| 1420511_at   | 1.08089 "retinal degeneration, slow (retinitis pigmentosa 7)"                                               | Rds           |
| 1420512_at   | 1.01809 dickkopf homolog 2 (Xenopus laevis)                                                                 | Dkk2          |
| 1420513_at   | 1.12326 EF-hand calcium binding domain 2                                                                    | Efcab2        |
| 1420514_at   | 1.01609 Transmembrane protein 47                                                                            | Tmem47        |
| 1420515_a_at | 1.15206 peptidoglycan recognition protein 2                                                                 | Pglyrp2       |
| 1420516_at   | 1.00651 nonagouti                                                                                           | a             |
| 1420517_at   | 0.86282 RIKEN cDNA 2310010I16 gene                                                                          | 2310010I16Rik |
| 1420518_a_at | 0.93263 "immunoglobulin superfamily, member 9"                                                              | Igsf9         |
| 1420519_a_at | 0.99501 Era (G-protein)-like 1 (E. coli)                                                                    | Eral1         |
| 1420520_x_at | 0.98234 Era (G-protein)-like 1 (E. coli)                                                                    | Eral1         |
| 1420521_at   | 0.99586 "papilin, proteoglycan-like sulfated glycoprotein"                                                  | Papln         |
| 1420522_at   | 0.91117 coiled-coil domain containing 50                                                                    | Ccdc50        |



1420523\_at 0.91411 coiled-coil domain containing 50 Ccdc50  
 1420524\_a\_at 0.86036 mannan-binding lectin serine peptidase 2 Masp2  
 1420525\_a\_at 1.09404 ornithine transcarbamylase Otc  
 1420526\_at 0.95796 "discoidin, CUB and LCCL domain containing 2" Dcbld2  
 1420527\_s\_at 1.01160 t-complex protein 10a /// t-complex protein 10b /// t-complex protein 10c  
 Tcp10a /// Tcp10b /// Tcp10c  
 1420528\_at 0.95789 G patch domain containing 2 Gpatc2  
 1420529\_at 0.98303 neuronal d4 domain family member Neud4  
 1420530\_at 0.93083 neuronal d4 domain family member Neud4  
 1420531\_at 0.97650 "hydroxy-delta-5-steroid dehydrogenase, 3 beta- and steroid delta-isomerase 5"  
 Hsd3b5  
 1420532\_at 0.88542 "membrane associated guanylate kinase, WW and PDZ domain containing 2"  
 Magi2  
 1420533\_at 0.92064 "guanylate cyclase 1, soluble, alpha 3" Gucy1a3  
 1420534\_at 0.93080 "guanylate cyclase 1, soluble, alpha 3" Gucy1a3  
 1420535\_a\_at 0.99452 negative regulator of ubiquitin-like proteins 1 Nub1  
 1420536\_at 0.94807 "crystallin, beta B2" Crybb2  
 1420537\_at 0.90729 potassium channel tetramerisation domain containing 4 Kctd4  
 1420538\_at 0.90595 "G protein-coupled receptor, family C, group 5, member D" Gprc5d  
 1420539\_a\_at 0.95258 chordin-like 2 Chrdl2  
 1420540\_a\_at 1.00462 Ras-like without CAAX 1 Rit1  
 1420541\_at 1.04034 retinol dehydrogenase 16 Rdh16  
 1420542\_at 1.03169 open reading frame 28 ORF28  
 1420543\_at 0.89509 open reading frame 28 ORF28  
 1420544\_at 0.95578 germinal center expressed transcript 2 Gcet2  
 1420545\_a\_at 0.96580 chimerin (chimaerin) 1 Chn1  
 1420546\_at 1.00823 tyrosine hydroxylase Th  
 1420547\_at 1.12306 galactosylceramidase Galc  
 1420548\_a\_at 1.22697 RIKEN cDNA 2310008H09 gene 2310008H09Rik  
 1420549\_at 1.32318 guanylate nucleotide binding protein 1 Gbp1  
 1420550\_at 0.93221 RIKEN cDNA 1110055J05 gene 1110055J05Rik  
 1420551\_at 0.98826 RIKEN cDNA 2310039E09 gene 2310039E09Rik  
 1420552\_s\_at 1.02032 testis specific gene A8 Tsga8  
 1420553\_x\_at 0.98110 "serine (or cysteine) peptidase inhibitor, clade A, member 1a" Serpina1a  
 1420554\_a\_at 0.99027 RAS-related C3 botulinum substrate 3 Rac3  
 1420555\_at 0.92350 aristaless 3 Alx3  
 1420556\_at 0.99735 oxytocin Oxt  
 1420557\_at 1.12246 Eph receptor A5 Epha5  
 1420558\_at 1.23025 "selectin, platelet" Selp  
 1420559\_a\_at 0.94704 short stature homeobox 2 Shox2  
 1420560\_at 1.04707 "cholinergic receptor, nicotinic, epsilon polypeptide" Chrne  
 1420561\_at 0.93216 "transient receptor potential cation channel, subfamily C, member 7" Trpc7  
 1420562\_at 0.95114 secreted Ly6/Plaur domain containing 1 Slurp1

|              |         |                                                                                   |                                    |
|--------------|---------|-----------------------------------------------------------------------------------|------------------------------------|
| 1420563_at   | 1.09899 | "glutamate receptor, ionotropic, AMPA3 (alpha 3)"                                 | Gria3                              |
| 1420564_at   | 0.96918 | insulin receptor-related receptor                                                 | Insr                               |
| 1420565_at   | 0.88002 | homeo box A1                                                                      | Hoxa1                              |
| 1420566_at   | 0.99810 | ---                                                                               | ---                                |
| 1420567_at   | 0.95901 | "protein kinase C, nu"                                                            | Prkc                               |
| 1420568_at   | 0.85498 | stimulated by retinoic acid gene 8                                                | Stra8                              |
| 1420569_at   | 0.96587 | chondroadherin                                                                    | Chad                               |
| 1420570_x_at | 0.96702 | "T-cell leukemia/lymphoma 1B, 3"                                                  | Tcl1b3                             |
| 1420571_at   | 1.11484 | prolactin-like protein B                                                          | Prlpb                              |
| 1420572_at   | 1.05171 | "membrane-spanning 4-domains, subfamily A, member 3"                              | Ms4a3                              |
| 1420573_at   | 0.95650 | homeo box D1                                                                      | Hoxd1                              |
| 1420574_at   | 0.94084 | RIKEN cDNA 1700065I17 gene                                                        | 1700065I17Rik                      |
| 1420575_at   | 0.92149 | metallothionein 3                                                                 | Mt3                                |
| 1420576_at   | 0.94809 | "endothelial differentiation, lysophosphatidic acid G-protein-coupled receptor 4" | Edg4                               |
| 1420577_at   | 0.88022 | activation-induced cytidine deaminase                                             | Aicda                              |
| 1420578_at   | 0.92773 | opticin                                                                           | Optc                               |
| 1420579_s_at | 0.95944 | cystic fibrosis transmembrane conductance regulator homolog                       | Cftr                               |
| 1420580_at   | 1.03029 | RIKEN cDNA 4930429B21 gene                                                        | 4930429B21Rik                      |
| 1420581_at   | 0.96408 | G protein-coupled receptor 143                                                    | Gpr143                             |
| 1420582_at   | 1.02329 | CD209e antigen                                                                    | Cd209e                             |
| 1420583_a_at | 0.85468 | RAR-related orphan receptor alpha                                                 | Rora                               |
| 1420584_at   | 1.00969 | "phospholipase A2, group IIC"                                                     | Pla2g2c                            |
| 1420585_a_at | 0.95763 | nuclear RNA export factor 2                                                       | Nxf2                               |
| 1420586_at   | 1.00501 | RIKEN cDNA 2900054J07 gene                                                        | 2900054J07Rik                      |
| 1420587_at   | 1.02183 | testis specific gene A13                                                          | Tsga13                             |
| 1420588_at   | 0.93172 | "serine protease inhibitor-like, with Kunitz and WAP domains 1 (eppin)"           | Spinlw1                            |
| 1420589_at   | 0.86213 | hyaluronan synthase 3                                                             | Has3                               |
| 1420590_at   | 0.92714 | hyaluronan synthase1                                                              | Has1                               |
| 1420591_at   | 1.02032 | G protein-coupled receptor 84                                                     | Gpr84                              |
| 1420592_a_at | 1.11345 | "acidic (leucine-rich) nuclear phosphoprotein 32 family, member E"                | Anp32e                             |
| 1420593_a_at | 0.95881 | TEA domain family member 3                                                        | Tead3                              |
| 1420594_at   | 0.97578 | BRCA1 associated RING domain 1                                                    | Bard1                              |
| 1420595_at   | 0.73223 | distal-less homeobox 4                                                            | Dlx4                               |
| 1420596_at   | 0.93889 | "calcium channel, voltage-dependent, gamma subunit 2"                             | Cacng2                             |
| 1420597_a_at | 0.96296 | calcium binding protein 2                                                         | Cabp2                              |
| 1420598_x_at | 1.04175 | "defensin related cryptdin, related sequence 2"                                   | Defcr-rs2                          |
| 1420599_at   | 1.00365 | RIKEN cDNA 2300006N05 gene                                                        | /// hypothetical protein LOC670472 |
|              |         | hypothetical protein LOC670482                                                    | 2300006N05Rik                      |
|              |         | /// LOC670472                                                                     | /// LOC670482                      |
| 1420600_at   | 0.98704 | thyroid peroxidase                                                                | Tpo                                |
| 1420601_at   | 1.04326 | glial cells missing homolog 1 (Drosophila)                                        | Gcm1                               |
| 1420602_a_at | 0.90200 | "extraembryonic, spermatogenesis, homeobox 1"                                     | Esx1                               |

1420603\_s\_at 0.91981 "retinoic acid early transcript 1, alpha /// retinoic acid early transcript beta ///  
retinoic acid early transcript gamma /// retinoic acid early transcript delta /// retinoic acid early transcript  
1E" Raet1a /// Raet1b /// Raet1c /// Raet1d /// Raet1e

1420604\_at 0.96877 homeo box gene expressed in ES cells Hesx1

1420605\_at 1.03446 metastasis associated gene 2 Mtag2

1420606\_at 1.06390 neuropeptide FF-amide peptide precursor Npff

1420607\_at 0.95015 RNA binding motif protein 18 Rbm18

1420608\_at 0.92833 RNA binding motif protein 18 Rbm18

1420609\_at 0.87759 membrane-associated ring finger (C3HC4) 7 7-Mar

1420610\_at 0.83466 "protein kinase, cAMP dependent, catalytic, beta" Prkacb

1420611\_at 0.89267 "protein kinase, cAMP dependent, catalytic, beta" Prkacb

1420612\_s\_at 1.13899 protein tyrosine phosphatase 4a2 Ptp4a2

1420613\_at 1.19703 protein tyrosine phosphatase 4a2 Ptp4a2

1420614\_at 0.84874 dynein light chain Tctex-type 3 Dynlt3

1420615\_at 0.80211 "ash2 (absent, small, or homeotic)-like (Drosophila)" Ash2l

1420616\_at 0.98416 "ash2 (absent, small, or homeotic)-like (Drosophila)" Ash2l

1420617\_at 0.89481 cytoplasmic polyadenylation element binding protein 4 Cpeb4

1420618\_at 0.77197 cytoplasmic polyadenylation element binding protein 4 Cpeb4

1420619\_a\_at 0.83789 amino-terminal enhancer of split Aes

1420620\_a\_at 0.89689 ring finger protein 13 Rnf13

1420621\_a\_at 0.81069 amyloid beta (A4) precursor protein App

1420622\_a\_at 0.97792 heat shock protein 8 /// similar to heat shock protein 8 /// heat shock protein 8  
pseudogene /// similar to heat shock protein 8 Hspa8 /// LOC621284 /// LOC666904 /// LOC669493

1420623\_x\_at 0.97471 heat shock protein 8 /// similar to heat shock protein 8 /// heat shock protein 8  
pseudogene Hspa8 /// LOC621284 /// LOC666904

1420624\_a\_at 1.03840 vesicle-associated membrane protein 8 Vamp8

1420625\_at 0.98096 RIKEN cDNA 2410016F19 gene 2410016F19Rik

1420626\_at 1.05873 RIKEN cDNA 2410016F19 gene 2410016F19Rik

1420627\_a\_at 0.97334 casein alpha s1 Csn1s1

1420628\_at 1.14468 purine rich element binding protein A Pura

1420629\_a\_at 1.12709 "DnaJ (Hsp40) homolog, subfamily A, member 3" Dnaja3

1420630\_at 0.86290 RIKEN cDNA 8430419L09 gene 8430419L09Rik

1420631\_a\_at 1.00894 bladder cancer associated protein homolog (human) Blcap

1420632\_a\_at 0.93732 Bernardinelli-Seip congenital lipodystrophy 2 homolog (human) Bslc2

1420633\_a\_at 0.93235 casein alpha s2-like A Csn1s2a

1420634\_a\_at 1.05670 MAD homolog 2 (Drosophila) Smad2

1420635\_a\_at 1.01707 "T-cell, immune regulator 1, ATPase, H+ transporting, lysosomal V0 protein  
A3" Tcirg1

1420636\_a\_at 1.01117 dual specificity phosphatase 12 Dusp12

1420637\_at 0.92076 phosphoribosyl pyrophosphate synthetase 2 Prps2

1420638\_at 1.00582 phosphoribosyl pyrophosphate synthetase 2 Prps2

1420639\_at 0.87687 junction-mediating and regulatory protein Jmy

1420640\_at 0.96781 junction-mediating and regulatory protein Jmy

1420641\_a\_at 0.86802 sulfide quinone reductase-like (yeast) Sqrdl  
1420642\_a\_at 0.88247 RIKEN cDNA 2010100O12 gene 2010100O12Rik  
1420643\_at 0.75393 lunatic fringe gene homolog (Drosophila) Lfng  
1420644\_a\_at 1.12670 "Sec61, alpha subunit 2 (S. cerevisiae)" Sec61a2  
1420645\_at 1.01440 polycomb group ring finger 2 Pcgf2  
1420646\_at 1.12312 "DNA segment, Chr 10, ERATO Doi 438, expressed" D10Ert438e  
1420647\_a\_at 0.91617 "keratin 8 /// similar to Keratin, type II cytoskeletal 8 (Cytokeratin 8) (Cytokeratin endo A) /// similar to Keratin, type II cytoskeletal 8 (Cytokeratin-8) (CK-8) (Keratin-8) (K8) (Cytokeratin endo A)" Krt8 /// LOC434261 /// LOC675884  
1420648\_at 1.13398 tripartite motif protein 12 Trim12  
1420649\_at 0.95328 AT motif binding factor 1 Atbf1  
1420650\_at 0.92736 AT motif binding factor 1 Atbf1  
1420651\_at 0.96877 arginine-tRNA-protein transferase 1 Ate1  
1420652\_at 0.95359 arginine-tRNA-protein transferase 1 Ate1  
1420653\_at 0.99570 "transforming growth factor, beta 1" Tgfb1  
1420654\_a\_at 1.12658 "glucan (1,4-alpha-), branching enzyme 1" Gbe1  
1420655\_at 0.86215 patatin-like phospholipase domain containing 3 Pnpla3  
1420656\_at 0.80675 "ATP-binding cassette, sub-family G (WHITE), member 8" Abcg8  
1420657\_at 1.09789 "uncoupling protein 3 (mitochondrial, proton carrier)" Ucp3  
1420658\_at 0.99103 "uncoupling protein 3 (mitochondrial, proton carrier)" Ucp3  
1420659\_at 0.99404 SLAM family member 6 Slamf6  
1420660\_at 1.01480 leucine rich repeat containing 6 (testis) Lrrc6  
1420661\_a\_at 0.87461 RIKEN cDNA 4933439F18 gene 4933439F18Rik  
1420662\_at 1.06622 RIKEN cDNA 4933439F18 gene 4933439F18Rik  
1420663\_at 1.06974 Zinc finger and BTB domain containing 7B Zbtb7b  
1420664\_s\_at 1.12527 "protein C receptor, endothelial" Procr  
1420665\_at 0.93105 integrin beta 3 binding protein (beta3-endonexin) Itgb3bp  
1420666\_at 0.96766 "double C2, beta" Doc2b  
1420667\_at 0.99388 "double C2, beta" Doc2b  
1420668\_a\_at 0.94301 "Yip1 domain family, member 2" Yipf2  
1420669\_at 0.94474 aryl hydrocarbon receptor nuclear translocator 2 Arnt2  
1420670\_at 1.12150 aryl hydrocarbon receptor nuclear translocator 2 Arnt2  
1420671\_x\_at 0.96436 "membrane-spanning 4-domains, subfamily A, member 4C" Ms4a4c  
1420672\_at 0.98106 "potassium voltage-gated channel, Isk-related subfamily, member 1" Kcne1  
1420673\_a\_at 0.89856 "acyl-Coenzyme A oxidase 2, branched chain" Acox2  
1420674\_at 1.08746 "phospholipase A2, group IIE" Pla2g2e  
1420675\_at 0.90682 zinc finger protein 113 Zfp113  
1420676\_at 1.06954 small proline rich-like 3 Sprl3  
1420677\_x\_at 0.97958 small proline rich-like 3 Sprl3  
1420678\_a\_at 1.07567 interleukin 17 receptor B Il17rb  
1420679\_a\_at 0.82168 androgen-induced 1 Aig1  
1420680\_at 0.92941 cathepsin 8 Cts8  
1420681\_at 1.00704 RIKEN cDNA 1700120K04 gene 1700120K04Rik

1420682\_at 1.18456 "cholinergic receptor, nicotinic, beta polypeptide 1 (muscle)" Chrb1  
 1420683\_at 1.14992 BCL2/adenovirus E1B 19kD interacting protein like Bnpl  
 1420684\_at 0.84405 "acyl-Coenzyme A oxidase 3, pristanoyl" Acox3  
 1420685\_at 0.82832 GRB2-related adaptor protein 2 /// similar to GRB2-related adaptor protein 2  
 (GADS protein) (Growth factor receptor binding protein) (GRBLG) (GRB-2-like protein) (GRB2L)  
 (Hematopoietic cell-associated adaptor protein GrpL) (GRB-2-related monocytic adapter protein)  
 (Monocytic adapter... Grap2 /// LOC674050  
 1420686\_at 0.95459 "crystallin, beta A4" Cryba4  
 1420687\_at 0.96062 RIKEN cDNA 4932438H23 gene 4932438H23Rik  
 1420688\_a\_at 0.86498 "sarcoglycan, epsilon" Sgce  
 1420689\_at 0.97586 RIKEN cDNA 4933415F23 gene 4933415F23Rik  
 1420690\_at 0.88806 fibroblast growth factor 10 Fgf10  
 1420691\_at 0.97919 "interleukin 2 receptor, alpha chain" Il2ra  
 1420692\_at 0.93259 "interleukin 2 receptor, alpha chain" Il2ra  
 1420693\_at 0.89809 myomesin 1 Myom1  
 1420694\_a\_at 1.05165 dachshund 1 (Drosophila) Dach1  
 1420695\_at 0.94146 dachshund 1 (Drosophila) Dach1  
 1420696\_at 0.94569 "sema domain, immunoglobulin domain (Ig), short basic domain, secreted,  
 (semaphorin) 3C" Sema3c  
 1420697\_at 0.91166 "solute carrier family 15, member 3" Slc15a3  
 1420698\_at 1.08587 glutathione peroxidase 5 Gpx5  
 1420699\_at 1.00232 "C-type lectin domain family 7, member a" Clec7a  
 1420700\_s\_at 1.05449 folate receptor 4 (delta) Folr4  
 1420701\_at 1.00996 kallikrein 1-related peptidase b1 Klk1b1  
 1420702\_at 1.08727 RIKEN cDNA 1700093K21 gene 1700093K21Rik  
 1420703\_at 1.04832 "colony stimulating factor 2 receptor, alpha, low-affinity (granulocyte-  
 macrophage)" Csf2ra  
 1420704\_at 0.86633 "colony stimulating factor 2 receptor, alpha, low-affinity (granulocyte-  
 macrophage) /// similar to Granulocyte-macrophage colony-stimulating factor receptor alpha chain  
 precursor (GM-CSF-R-alpha) (GMR) (CD116 antigen)" Csf2ra /// LOC671366  
 1420705\_at 0.94281 forkhead box B1 Foxb1  
 1420706\_at 1.00913 P140 gene P140  
 1420707\_a\_at 1.23079 TRAF-interacting protein Traip  
 1420708\_at 0.91157 TRAF-interacting protein Traip  
 1420709\_s\_at 0.97797 D-amino acid oxidase 1 Dao1  
 1420710\_at 1.17098 reticuloendotheliosis oncogene Rel  
 1420711\_a\_at 0.92764 peroxisomal membrane protein 3 Pxmp3  
 1420712\_a\_at 1.36636 hepsin Hpn  
 1420713\_a\_at 0.97833 MyoD family inhibitor Mdf1  
 1420714\_at 0.94155 ladybird homeobox homolog 2 (Drosophila) Lbx2  
 1420715\_a\_at 0.93175 peroxisome proliferator activated receptor gamma Pparg  
 1420716\_at 0.79570 CD247 antigen Cd247  
 1420717\_at 0.98586 RIKEN cDNA A930018P22 gene A930018P22Rik

1420718\_at 1.03048 odd Oz/ten-m homolog 2 (Drosophila) /// similar to odd Oz/ten-m homolog  
 2 Odz2 /// LOC669490  
 1420719\_at 0.88220 testis expressed gene 15 Tex15  
 1420720\_at 1.11656 neuronal pentraxin 2 Nptx2  
 1420721\_at 1.08943 RIKEN cDNA 4921536K21 gene 4921536K21Rik  
 1420722\_at 1.00397 "elongation of very long chain fatty acids (FEN1/Elo2, SUR4/Elo3, yeast)-like  
 3" Elovl3  
 1420723\_at 1.00668 vanin 3 Vnn3  
 1420724\_at 0.92883 RIKEN cDNA 1700067P10 gene 1700067P10Rik  
 1420725\_at 0.97229 "trimethyllysine hydroxylase, epsilon" Tmlhe  
 1420726\_x\_at 1.10285 "trimethyllysine hydroxylase, epsilon" Tmlhe  
 1420727\_a\_at 1.07937 "trimethyllysine hydroxylase, epsilon" Tmlhe  
 1420728\_at 1.03314 keratin 32 Krt32  
 1420729\_at 0.93465 "2-cell-stage, variable group, member 1" Tcstv1  
 1420730\_a\_at 1.08648 t-complex protein 11 Tcp11  
 1420731\_a\_at 0.77282 cysteine and glycine-rich protein 2 Csrp2  
 1420732\_at 0.97874 RIKEN cDNA 2510027J23 gene 2510027J23Rik  
 1420733\_at 0.93974 calcium binding protein 39-like Cab39l  
 1420734\_at 1.01299 "protein phosphatase 1, regulatory (inhibitor) subunit 3F" Ppp1r3f  
 1420735\_at 1.00755 "gamma-aminobutyric acid (GABA-C) receptor, subunit rho 2" Gabrr2  
 1420736\_at 0.90574 single-minded homolog 1 (Drosophila) Sim1  
 1420737\_at 0.96538 polyamine modulated factor 1 binding protein 1 Pmfbp1  
 1420738\_at 1.09254 myeloid zinc finger 1 Mzf1  
 1420739\_at 0.92348 contactin 3 Cntn3  
 1420740\_at 1.04033 interleukin 25 Il25  
 1420741\_x\_at 0.99437 RIKEN cDNA 2310069N01 gene 2310069N01Rik  
 1420742\_at 0.98465 a disintegrin and metallopeptidase domain 7 Adam7  
 1420743\_a\_at 0.99367 "protein phosphatase 3, catalytic subunit, gamma isoform" Ppp3cc  
 1420744\_at 1.01820 "cholinergic receptor, nicotinic, beta polypeptide 2 (neuronal)" Chrn2  
 1420745\_a\_at 0.88142 cyclin D-type binding-protein 1 Ccndbp1  
 1420746\_at 0.99190 prolactin-like protein I Prlpi  
 1420747\_at 2.34942 per-pentamer repeat gene Ppnr  
 1420748\_a\_at 1.05881 "adenosine deaminase, tRNA-specific 1" Adat1  
 1420749\_a\_at 0.93094 "POU domain, class 6, transcription factor 1" Pou6f1  
 1420750\_at 1.06160 RIKEN cDNA 1110006O24 gene 1110006O24Rik  
 1420751\_at 0.99885 keratin associated protein 6-1 Krtap6-1  
 1420752\_at 0.83271 deltex 3 homolog (Drosophila) Dtx3  
 1420753\_at 1.00301 tolloid-like Tll1  
 1420754\_at 1.03309 transcription termination factor 1 Ttf1  
 1420755\_a\_at 1.11980 parkin Park2  
 1420756\_at 1.02062 fucosyltransferase 7 Fut7  
 1420757\_at 0.99681 myogenic factor 5 Myf5  
 1420758\_at 0.99003 RIKEN cDNA 583041J07 gene 583041J07Rik

1420759\_s\_at 1.01886 "zinc finger protein 1, Y linked /// zinc finger protein 2, Y linked" Zfy1 ///  
 Zfy2  
 1420760\_s\_at 1.08424 N-myc downstream regulated-like Ndr1  
 1420761\_at 0.97825 "cholinergic receptor, nicotinic, delta polypeptide" Chrnd  
 1420762\_a\_at 0.86020 Y box protein 2 Ybx2  
 1420763\_at 0.95666 "kallikrein 4 (prostase, enamel matrix, prostate)" Klk4  
 1420764\_at 0.94209 scrapie responsive gene 1 Scrg1  
 1420765\_a\_at 0.90726 forkhead box P3 Foxp3  
 1420766\_at 0.97756 suppressor of cytokine signaling 7 Socs7  
 1420767\_at 0.95823 RIKEN cDNA 1700019G17 gene 1700019G17Rik  
 1420768\_a\_at 0.92876 "DNA segment, Chr 11, Lothar Hennighausen 2, expressed" D11Lgp2e  
 1420769\_at 0.99975 "DNA segment, Chr 11, Lothar Hennighausen 2, expressed" D11Lgp2e  
 1420770\_at 1.05633 kallikrein 1-related peptidase b24 Klk1b24  
 1420771\_at 1.00066 small proline-rich protein 2D Sprr2d  
 1420772\_a\_at 0.71944 TSC22 domain family 3 Tsc22d3  
 1420773\_at 0.84839 deubiquitinating enzyme 1 Dub1  
 1420774\_a\_at 1.11303 RIKEN cDNA 4930583H14 gene 4930583H14Rik  
 1420775\_at 0.98224 haloacid dehalogenase-like hydrolase domain Hdhd1a  
 1420776\_a\_at 0.83973 AU RNA binding protein/enoyl-coenzyme A hydratase Auh  
 1420777\_a\_at 1.00434 RIKEN cDNA 4933400A11 gene 4933400A11Rik  
 1420778\_at 0.99178 "taste receptor, type 1, member 3" Tas1r3  
 1420779\_at 1.05728 four and a half LIM domains 3 Fhl3  
 1420780\_at 0.99696 achaete-scute complex homolog-like 3 (Drosophila) Ascl3  
 1420781\_at 1.20562 ectopic ossification 1 Etos1  
 1420782\_at 1.08268 "tumor necrosis factor receptor superfamily, member 17" Tnfrsf17  
 1420783\_at 0.94434 tumor protein D52-like 3 Trpd52l3  
 1420784\_at 0.96981 "sodium channel, voltage-gated, type XI, alpha" Scn11a  
 1420785\_at 1.18373 growth factor receptor bound protein 2-associated protein 2 Gab2  
 1420786\_a\_at 0.97899 "RNA binding motif protein, Y chromosome, family 1, member A1" Rbmy1a1  
 1420787\_at 1.09162 RIKEN cDNA 4933436I01 gene 4933436I01Rik  
 1420788\_at 1.13949 "killer cell lectin-like receptor subfamily G, member 1" Klr1g1  
 1420789\_at 1.13837 "killer cell lectin-like receptor, subfamily A, member 5" Klra5  
 1420790\_x\_at 1.11555 "killer cell lectin-like receptor, subfamily A, member 16" Klra16  
 1420791\_x\_at 1.03340 spermatogenesis associated glutamate (E)-rich protein 4f Speer4f  
 1420792\_at 1.06637 RIKEN cDNA 4930433N12 gene 4930433N12Rik  
 1420793\_at 0.93058 major urinary protein 4 Mup4  
 1420794\_at 0.98393 ADP-ribosyltransferase 2b Art2b  
 1420795\_at 1.07925 fibroblast growth factor 9 Fgf9  
 1420796\_at 1.01909 aryl-hydrocarbon receptor repressor Ahrr  
 1420797\_at 0.95782 otogelin Otog  
 1420798\_s\_at 0.82033 "protocadherin alpha 4 /// protocadherin alpha 6 /// protocadherin alpha 7 ///  
 protocadherin alpha 5 /// protocadherin alpha 11 /// protocadherin alpha 10 /// protocadherin alpha 1 ///  
 protocadherin alpha 9 /// protocadherin alpha 3 /// protocadherin alpha 12 /// protocadherin alpha 2 ///

protocadherin alpha 8 /// protocadherin alpha subfamily C, 1 /// protocadherin alpha subfamily C, 2"  
 Pcdha4 /// Pcdha6 /// Pcdha7 /// Pcdha5 /// Pcdha11 /// Pcdha10 /// Pcdha1 /// Pcdha9 /// Pcdha3 ///  
 Pcdha12 /// Pcdha2 /// Pcdha8 /// Pcdhac1 /// Pcdhac2  
 1420799\_at 1.00355 neurotensin receptor 1 Ntsr1  
 1420800\_a\_at 1.16036 "potassium voltage-gated channel, subfamily Q, member 2" Kcnq2  
 1420801\_at 0.89593 neuronal PAS domain protein 1 Npas1  
 1420802\_at 1.05941 interleukin 13 Il13  
 1420803\_at 1.05125 testis expressed gene 18 Tex18  
 1420804\_s\_at 1.08230 "C-type lectin domain family 4, member d" Clec4d  
 1420805\_at 0.98258 "myosin light chain 2, precursor lymphocyte-specific" Mylc2pl  
 1420806\_at 1.04543 fibroblast growth factor 16 Fgf16  
 1420807\_a\_at 1.12154 "EGF-like-domain, multiple 9" Egf19  
 1420808\_at 0.95859 nuclear receptor coactivator 4 /// similar to nuclear receptor coactivator 4  
 Ncoa4 /// LOC627557  
 1420809\_a\_at 0.94974 RIKEN cDNA 1500003O03 gene 1500003O03Rik  
 1420810\_at 0.99943 RIKEN cDNA 1500003O03 gene 1500003O03Rik  
 1420811\_a\_at 1.02418 "catenin (cadherin associated protein), beta 1" Ctnnb1  
 1420812\_at 0.98766 histone deacetylase 7A Hdac7a  
 1420813\_at 0.98448 histone deacetylase 7A Hdac7a  
 1420814\_at 0.98187 guanosine diphosphate (GDP) dissociation inhibitor 2 Gdi2  
 1420815\_at 0.95050 guanosine diphosphate (GDP) dissociation inhibitor 2 Gdi2  
 1420816\_at 1.03854 "3-monooxygenase/tryptophan 5-monooxygenase activation protein, gamma  
 polypeptide" Ywhag  
 1420817\_at 1.01022 "3-monooxygenase/tryptophan 5-monooxygenase activation protein, gamma  
 polypeptide" Ywhag  
 1420818\_at 0.87266 src-like adaptor Sla  
 1420819\_at 0.84659 src-like adaptor Sla  
 1420820\_at 0.98420 RIKEN cDNA 2900073G15 gene 2900073G15Rik  
 1420821\_at 1.09303 sphingosine-1-phosphate phosphatase 1 Sgpp1  
 1420822\_s\_at 1.07028 sphingosine-1-phosphate phosphatase 1 Sgpp1  
 1420823\_at 0.86625 "sema domain, immunoglobulin domain (Ig), transmembrane domain (TM) and  
 short cytoplasmic domain, (semaphorin) 4D" Sema4d  
 1420824\_at 0.89478 "sema domain, immunoglobulin domain (Ig), transmembrane domain (TM) and  
 short cytoplasmic domain, (semaphorin) 4D" Sema4d  
 1420825\_at 0.97330 leucine zipper-EF-hand containing transmembrane protein 1 Letm1  
 1420826\_at 1.01848 leucine zipper-EF-hand containing transmembrane protein 1 Letm1  
 1420827\_a\_at 1.13854 cyclin G1 Ccng1  
 1420828\_s\_at 0.97580 "tyrosine 3-monooxygenase/tryptophan 5-monooxygenase activation protein,  
 theta polypeptide" Ywhaq  
 1420829\_a\_at 0.93118 "tyrosine 3-monooxygenase/tryptophan 5-monooxygenase activation protein,  
 theta polypeptide" Ywhaq  
 1420830\_x\_at 0.88458 "tyrosine 3-monooxygenase/tryptophan 5-monooxygenase activation protein,  
 theta polypeptide" Ywhaq



|              |         |                                                                                                |          |  |
|--------------|---------|------------------------------------------------------------------------------------------------|----------|--|
| 1420831_at   | 0.94286 | quiescin Q6                                                                                    | Qscn6    |  |
| 1420832_at   | 1.00199 | quiescin Q6                                                                                    | Qscn6    |  |
| 1420833_at   | 0.85761 | vesicle-associated membrane protein 2                                                          | Vamp2    |  |
| 1420834_at   | 0.92322 | vesicle-associated membrane protein 2                                                          | Vamp2    |  |
| 1420835_at   | 0.94754 | "solute carrier family 25, member 30"                                                          | Slc25a30 |  |
| 1420836_at   | 0.94990 | "solute carrier family 25, member 30"                                                          | Slc25a30 |  |
| 1420837_at   | 1.04204 | "neurotrophic tyrosine kinase, receptor, type 2"                                               | Ntrk2    |  |
| 1420838_at   | 1.12562 | "neurotrophic tyrosine kinase, receptor, type 2"                                               | Ntrk2    |  |
| 1420839_at   | 0.99631 | "pleckstrin homology domain-containing, family A (phosphoinositide binding specific) member 3" | Plekha3  |  |
| 1420840_at   | 0.97214 | "pleckstrin homology domain-containing, family A (phosphoinositide binding specific) member 3" | Plekha3  |  |
| 1420841_at   | 0.95828 | "protein tyrosine phosphatase, receptor type, F"                                               | Ptprf    |  |
| 1420842_at   | 0.93359 | "protein tyrosine phosphatase, receptor type, F"                                               | Ptprf    |  |
| 1420843_at   | 0.91314 | "protein tyrosine phosphatase, receptor type, F"                                               | Ptprf    |  |
| 1420844_at   | 0.99078 | ubiquilin 2                                                                                    | Ubqln2   |  |
| 1420845_at   | 0.95986 | mitochondrial ribosomal protein S2                                                             | Mrps2    |  |
| 1420846_at   | 0.97358 | mitochondrial ribosomal protein S2                                                             | Mrps2    |  |
| 1420847_a_at | 0.56703 | fibroblast growth factor receptor 2                                                            | Fgfr2    |  |
| 1420848_at   | 0.90520 | suppressor of fused homolog (Drosophila)                                                       | Sufu     |  |
| 1420849_at   | 1.04332 | "Crn, crooked neck-like 1 (Drosophila)"                                                        | Crnk11   |  |
| 1420850_at   | 0.97569 | "Crn, crooked neck-like 1 (Drosophila)"                                                        | Crnk11   |  |
| 1420851_at   | 0.87232 | par-6 partitioning defective 6 homolog gamma (C. elegans)                                      | Pard6g   |  |
| 1420852_a_at | 0.96264 | "UDP-GlcNAc:betaGal beta-1,3-N-acetylglucosaminyltransferase 2"                                | B3gnt2   |  |
| 1420853_at   | 1.01098 | syndecan 3                                                                                     | Sdc3     |  |
| 1420854_at   | 1.06557 | elastin                                                                                        | Eln      |  |
| 1420855_at   | 1.03183 | elastin                                                                                        | Eln      |  |
| 1420856_a_at | 0.94760 | LanC (bacterial lantibiotic synthetase component C)-like 2                                     | Lancl2   |  |
| 1420857_at   | 1.01063 | LanC (bacterial lantibiotic synthetase component C)-like 2                                     | Lancl2   |  |
| 1420858_at   | 0.79175 | "protein kinase inhibitor, alpha"                                                              | Pkia     |  |
| 1420859_at   | 0.75745 | "protein kinase inhibitor, alpha"                                                              | Pkia     |  |
| 1420860_at   | 0.87016 | integrin alpha 9                                                                               | Itga9    |  |
| 1420861_at   | 0.90042 | dynactin 4                                                                                     | Dctn4    |  |
| 1420862_at   | 0.93959 | dynactin 4                                                                                     | Dctn4    |  |
| 1420863_at   | 0.89153 | dynactin 4                                                                                     | Dctn4    |  |
| 1420864_at   | 0.82678 | zinc finger protein 161                                                                        | Zfp161   |  |
| 1420865_at   | 0.92611 | zinc finger protein 161                                                                        | Zfp161   |  |
| 1420866_at   | 0.80675 | zinc finger protein 161                                                                        | Zfp161   |  |
| 1420867_at   | 0.83464 | transmembrane emp24 domain trafficking protein 2                                               | Tmed2    |  |
| 1420868_s_at | 0.90044 | transmembrane emp24 domain trafficking protein 2                                               | Tmed2    |  |
| 1420869_at   | 0.99586 | myeloid/lymphoid or mixed lineage-leukemia translocation to 10 homolog (Drosophila)            | Mllt10   |  |
| 1420870_at   | 1.07046 | myeloid/lymphoid or mixed lineage-leukemia translocation to 10 homolog                         |          |  |

(Drosophila) Mllt10

1420871\_at 1.13354 "guanylate cyclase 1, soluble, beta 3" Gucy1b3

1420872\_at 1.14404 "guanylate cyclase 1, soluble, beta 3" Gucy1b3

1420873\_at 1.08597 protein tyrosine kinase 9 Ptk9

1420874\_at 0.93300 protein tyrosine kinase 9 Ptk9

1420875\_at 1.03224 protein tyrosine kinase 9 Ptk9

1420876\_a\_at 0.95704 septin 6 6-Sep

1420877\_at 0.80914 septin 6 6-Sep

1420878\_a\_at 0.97172 "tyrosine 3-monooxygenase/tryptophan 5-monooxygenase activation protein, beta polypeptide" Ywhab

1420879\_a\_at 0.88713 "tyrosine 3-monooxygenase/tryptophan 5-monooxygenase activation protein, beta polypeptide" Ywhab

1420880\_a\_at 0.88969 "tyrosine 3-monooxygenase/tryptophan 5-monooxygenase activation protein, beta polypeptide" Ywhab

1420881\_at 0.85786 nuclear receptor-binding SET-domain protein 1 Nsd1

1420882\_a\_at 0.97073 nuclear receptor-binding SET-domain protein 1 /// adrenocortical dysplasia Nsd1 /// Acd

1420883\_at 0.92759 sarcolipin Sln

1420884\_at 0.92208 sarcolipin Sln

1420885\_a\_at 1.09806 seizure related gene 6 Sez6

1420886\_a\_at 0.83042 X-box binding protein 1 Xbp1

1420887\_a\_at 0.89753 Bcl2-like 1 Bcl2l1

1420888\_at 1.02580 Bcl2-like 1 Bcl2l1

1420889\_at 0.90404 holocytochrome c synthetase Hccs

1420890\_at 0.91128 holocytochrome c synthetase Hccs

1420891\_at 1.11765 wingless-related MMTV integration site 7B Wnt7b

1420892\_at 1.20304 wingless-related MMTV integration site 7B Wnt7b

1420893\_a\_at 0.95614 "transforming growth factor, beta receptor I" Tgfbr1

1420894\_at 0.82972 "transforming growth factor, beta receptor I" Tgfbr1

1420895\_at 0.87068 "transforming growth factor, beta receptor I" Tgfbr1

1420896\_at 0.97300 synaptosomal-associated protein 23 Snap23

1420897\_at 0.93582 synaptosomal-associated protein 23 Snap23

1420898\_at 1.02065 synaptosomal-associated protein 23 Snap23

1420899\_at 0.95076 "RAB18, member RAS oncogene family" Rab18

1420900\_a\_at 0.96081 "RAB18, member RAS oncogene family" Rab18

1420901\_a\_at 1.02740 hexokinase 1 Hk1

1420902\_at 1.07994 "ST6 (alpha-N-acetyl-neuraminy-2,3-beta-galactosyl-1,3)-N-acetylgalactosaminide alpha-2,6-sialyltransferase 3" St6galnac3

1420903\_at 0.88776 "ST6 (alpha-N-acetyl-neuraminy-2,3-beta-galactosyl-1,3)-N-acetylgalactosaminide alpha-2,6-sialyltransferase 3" St6galnac3

1420904\_at 0.96155 interleukin 17 receptor A Il17ra

1420905\_at 1.31580 interleukin 17 receptor A Il17ra

1420906\_at 1.15706 CD2-associated protein Cd2ap

|              |         |                                                                        |               |
|--------------|---------|------------------------------------------------------------------------|---------------|
| 1420907_at   | 1.19999 | CD2-associated protein                                                 | Cd2ap         |
| 1420908_at   | 1.15694 | CD2-associated protein                                                 | Cd2ap         |
| 1420909_at   | 1.03136 | vascular endothelial growth factor A                                   | Vegfa         |
| 1420910_at   | 0.86458 | phosphatidic acid phosphatase type 2c                                  | Ppap2c        |
| 1420911_a_at | 0.82143 | milk fat globule-EGF factor 8 protein                                  | Mfge8         |
| 1420912_at   | 1.65249 | "AF4/FMR2 family, member 4"                                            | Aff4          |
| 1420913_at   | 0.97706 | "solute carrier organic anion transporter family, member 2a1"          | Slco2a1       |
| 1420914_at   | 1.10944 | ---                                                                    | ---           |
| 1420915_at   | 0.99210 | signal transducer and activator of transcription 1                     | Stat1         |
| 1420916_at   | 1.09834 | PRP40 pre-mRNA processing factor 40 homolog A (yeast)                  | Prpf40a       |
| 1420917_at   | 1.03257 | PRP40 pre-mRNA processing factor 40 homolog A (yeast)                  | Prpf40a       |
| 1420918_at   | 0.77922 | serum/glucocorticoid regulated kinase 3                                | Sgk3          |
| 1420919_at   | 0.72781 | serum/glucocorticoid regulated kinase 3                                | Sgk3          |
| 1420920_a_at | 0.97394 | ADP-ribosylation factor 1                                              | Arf1          |
| 1420921_at   | 1.05338 | CD151 antigen                                                          | Cd151         |
| 1420922_at   | 0.96384 | "ubiquitin specific peptidase 9, X chromosome"                         | Usp9x         |
| 1420923_at   | 1.17624 | "ubiquitin specific peptidase 9, X chromosome"                         | Usp9x         |
| 1420924_at   | 0.80993 | tissue inhibitor of metalloproteinase 2                                | Timp2         |
| 1420925_at   | 0.90042 | tubby candidate gene                                                   | Tub           |
| 1420926_at   | 1.06070 | aristaless related homeobox gene (Drosophila)                          | Arx           |
| 1420927_at   | 0.88079 | "beta galactoside alpha 2,6 sialyltransferase 1"                       | St6gal1       |
| 1420928_at   | 0.88620 | "beta galactoside alpha 2,6 sialyltransferase 1"                       | St6gal1       |
| 1420929_at   | 0.87285 | "catenin (cadherin associated protein), alpha-like 1"                  | Ctnnal1       |
| 1420930_s_at | 0.87699 | "catenin (cadherin associated protein), alpha-like 1"                  | Ctnnal1       |
| 1420931_at   | 1.06712 | mitogen activated protein kinase 8                                     | Mapk8         |
| 1420932_at   | 1.06900 | mitogen activated protein kinase 8                                     | Mapk8         |
| 1420933_a_at | 1.09490 | eyes absent 3 homolog (Drosophila)                                     | Eya3          |
| 1420934_a_at | 1.07536 | serine/arginine repetitive matrix 1                                    | Srrm1         |
| 1420935_a_at | 1.13489 | serine/arginine repetitive matrix 1                                    | Srrm1         |
| 1420936_s_at | 1.07742 | cleavage and polyadenylation specific factor 2                         | Cpsf2         |
| 1420937_at   | 1.03963 | cleavage and polyadenylation specific factor 2                         | Cpsf2         |
| 1420938_at   | 0.89702 | heparan sulfate 6-O-sulfotransferase 2                                 | Hs6st2        |
| 1420939_at   | 0.98079 | heparan sulfate 6-O-sulfotransferase 2                                 | Hs6st2        |
| 1420940_x_at | 0.93962 | regulator of G-protein signaling 5                                     | Rgs5          |
| 1420941_at   | 0.96711 | regulator of G-protein signaling 5                                     | Rgs5          |
| 1420942_s_at | 0.93722 | ---                                                                    | ---           |
| 1420943_at   | 0.88805 | zinc finger protein 185                                                | Zfp185        |
| 1420944_at   | 0.79373 | zinc finger protein 185                                                | Zfp185        |
| 1420945_at   | 0.89667 | alpha thalassemia/mental retardation syndrome X-linked homolog (human) | Atrx          |
| 1420946_at   | 0.91715 | alpha thalassemia/mental retardation syndrome X-linked homolog (human) | Atrx          |
| 1420947_at   | 1.07058 | alpha thalassemia/mental retardation syndrome X-linked homolog (human) | Atrx          |
| 1420948_s_at | 0.87014 | RIKEN cDNA 4833408C14 gene                                             | 4833408C14Rik |
| 1420949_at   | 0.79631 | zinc and ring finger 1                                                 | Znrf1         |

|              |         |                                                                                     |               |
|--------------|---------|-------------------------------------------------------------------------------------|---------------|
| 1420950_at   | 0.98093 | zinc and ring finger 1                                                              | Znrf1         |
| 1420951_a_at | 0.90079 | Son cell proliferation protein                                                      | Son           |
| 1420952_at   | 0.92706 | Son cell proliferation protein                                                      | Son           |
| 1420953_at   | 0.89042 | adducin 1 (alpha)                                                                   | Add1          |
| 1420954_a_at | 0.91909 | adducin 1 (alpha)                                                                   | Add1          |
| 1420955_at   | 1.10386 | visinin-like 1                                                                      | Vsnl1         |
| 1420956_at   | 1.01601 | adenomatosis polyposis coli                                                         | Apc           |
| 1420957_at   | 0.86561 | adenomatosis polyposis coli                                                         | Apc           |
| 1420958_at   | 1.10744 | ---                                                                                 | ---           |
| 1420959_at   | 0.75283 | aspartate-beta-hydroxylase                                                          | Asph          |
| 1420960_at   | 0.85952 | "Fanconi anemia, complementation group G"                                           | Fancg         |
| 1420961_a_at | 0.65129 | influenza virus NS1A binding protein                                                | Ivns1abp      |
| 1420962_at   | 1.02888 | hyaluronan and proteoglycan link protein 2                                          | Hapln2        |
| 1420963_at   | 0.89712 | hyaluronan and proteoglycan link protein 2                                          | Hapln2        |
| 1420964_at   | 1.04391 | ectodermal-neural cortex 1                                                          | Enc1          |
| 1420965_a_at | 0.98595 | ectodermal-neural cortex 1                                                          | Enc1          |
| 1420966_at   | 0.94397 | "solute carrier family 25 (mitochondrial carrier ornithine transporter), member 15" | Slc25a15      |
| 1420967_at   | 1.03218 | "solute carrier family 25 (mitochondrial carrier ornithine transporter), member 15" | Slc25a15      |
| 1420968_at   | 0.98596 | BTB (POZ) domain containing 14B                                                     | Btbd14b       |
| 1420969_at   | 0.97924 | BTB (POZ) domain containing 14B                                                     | Btbd14b       |
| 1420970_at   | 0.96748 | adenylate cyclase 7                                                                 | Adcy7         |
| 1420971_at   | 0.98895 | ubiquitin protein ligase E3 component n-recognin 1                                  | Ubr1          |
| 1420972_at   | 0.92040 | AT rich interactive domain 5B (Mrf1 like)                                           | Arid5b        |
| 1420973_at   | 0.76241 | AT rich interactive domain 5B (Mrf1 like)                                           | Arid5b        |
| 1420974_at   | 1.76011 | "SET domain, bifurcated 1"                                                          | Setdb1        |
| 1420975_at   | 1.04652 | "bromodomain adjacent to zinc finger domain, 1B"                                    | Baz1b         |
| 1420976_at   | 1.03011 | "mannosidase, alpha, class 1A, member 2"                                            | Man1a2        |
| 1420977_at   | 1.00739 | "mannosidase, alpha, class 1A, member 2"                                            | Man1a2        |
| 1420978_at   | 1.00587 | nuclear respiratory factor 1                                                        | Nrf1          |
| 1420979_at   | 0.99340 | p21 (CDKN1A)-activated kinase 1                                                     | Pak1          |
| 1420980_at   | 0.95104 | p21 (CDKN1A)-activated kinase 1                                                     | Pak1          |
| 1420981_a_at | 0.91617 | LIM domain only 4                                                                   | Lmo4          |
| 1420982_at   | 0.96376 | RNA binding motif protein 39                                                        | Rbm39         |
| 1420983_at   | 1.00650 | phosphatidylcholine transfer protein                                                | Pctp          |
| 1420984_at   | 1.11142 | phosphatidylcholine transfer protein                                                | Pctp          |
| 1420985_at   | 1.16252 | "ash1 (absent, small, or homeotic)-like (Drosophila)"                               | Ash11         |
| 1420986_s_at | 1.00934 | ---                                                                                 | ---           |
| 1420987_at   | 0.91203 | kinesin family member 3B                                                            | Kif3b         |
| 1420988_at   | 1.05406 | "polymerase (DNA directed), eta (RAD 30 related)"                                   | Polh          |
| 1420989_at   | 0.82483 | RIKEN cDNA 4933411K20 gene                                                          | 4933411K20Rik |
| 1420990_at   | 1.15187 | chromodomain helicase DNA binding protein 1                                         | Chd1          |

1420991\_at 1.18914 ankyrin repeat domain 1 (cardiac muscle) Ankrd1  
1420992\_at 1.24399 ankyrin repeat domain 1 (cardiac muscle) Ankrd1  
1420993\_at 0.99897 "UDP-GlcNAc:betaGal beta-1,3-N-acetylglucosaminyltransferase 5" B3gnt5  
1420994\_at 0.97896 "UDP-GlcNAc:betaGal beta-1,3-N-acetylglucosaminyltransferase 5" B3gnt5  
1420995\_at 0.87135 plexin A3 Plxna3  
1420996\_at 0.83726 plexin A3 Plxna3  
1420997\_a\_at 1.03975 glucose phosphate isomerase 1 /// similar to Glucose-6-phosphate isomerase (GPI) (Phosphoglucose isomerase) (PGI) (Phosphohexose isomerase) (PHI) (Neuroleukin) (NLK) Gpi1 /// LOC676596  
1420998\_at 0.95618 ets variant gene 5 Etv5  
1420999\_at 1.17964 "CCR4-NOT transcription complex, subunit 4" Cnot4  
1421000\_at 1.33805 "CCR4-NOT transcription complex, subunit 4" Cnot4  
1421001\_a\_at 0.97460 carbonic anhydrase 6 Car6  
1421002\_at 0.81116 angiopoietin-like 2 Angptl2  
1421003\_at 0.93910 glucocorticoid modulatory element binding protein 1 Gmeb1  
1421004\_at 0.84310 centrosomal protein 110 Cep110  
1421005\_at 0.98896 centrosomal protein 110 Cep110  
1421006\_at 0.90507 "procollagen, type IV, alpha 6" Col4a6  
1421007\_at 0.88375 "procollagen, type IV, alpha 6" Col4a6  
1421008\_at 0.97717 radical S-adenosyl methionine domain containing 2 Rsad2  
1421009\_at 1.12333 radical S-adenosyl methionine domain containing 2 Rsad2  
1421010\_at 1.08223 myelin-associated oligodendrocytic basic protein Mobp  
1421011\_at 0.80898 dehydrogenase/reductase (SDR family) member 8 Dhhrs8  
1421012\_at 0.86428 "signal recognition particle receptor, B subunit" Srprb  
1421013\_at 1.00454 "phosphatidylinositol transfer protein, beta" Pitpnb  
1421014\_a\_at 0.64337 citrate lyase beta like Clybl  
1421015\_s\_at 1.05345 "polymerase (DNA directed), epsilon 3 (p17 subunit)" Pole3  
1421016\_at 0.97277 immunoglobulin mu binding protein 2 Ighmbp2  
1421017\_at 0.99567 neuregulin 3 Nrg3  
1421018\_at 1.00680 RIKEN cDNA 1110018J18 gene 1110018J18Rik  
1421019\_at 0.92500 RIKEN cDNA 1700021F05 gene 1700021F05Rik  
1421020\_at 0.88365 RAN binding protein 17 Ranbp17  
1421021\_at 0.96807 --- ---  
1421022\_x\_at 0.86712 "acylphosphatase 1, erythrocyte (common) type" Acyp1  
1421023\_at 0.99951 "phosphatidylinositol 3-kinase, C2 domain containing, alpha polypeptide" Pik3c2a  
1421024\_at 0.99301 "1-acylglycerol-3-phosphate O-acyltransferase 1 (lysophosphatidic acid acyltransferase, alpha)" Agpat1  
1421025\_at 0.88708 "1-acylglycerol-3-phosphate O-acyltransferase 1 (lysophosphatidic acid acyltransferase, alpha)" Agpat1  
1421026\_at 0.88029 "guanine nucleotide binding protein, alpha 12" Gna12  
1421027\_a\_at 0.98572 myocyte enhancer factor 2C Mef2c  
1421028\_a\_at 0.95104 myocyte enhancer factor 2C Mef2c

1421029\_a\_at 0.92355 Hbs1-like (*S. cerevisiae*) Hbs11  
 1421030\_at 0.93337 zinc finger protein 64 Zfp64  
 1421031\_a\_at 1.52452 RIKEN cDNA 2310016C08 gene 2310016C08Rik  
 1421032\_a\_at 0.96622 "DnaJ (Hsp40) homolog, subfamily B, member 12" Dnajb12  
 1421033\_a\_at 1.14302 transcription elongation regulator 1 (CA150) Tcerg1  
 1421034\_a\_at 0.96299 "interleukin 4 receptor, alpha" Il4ra  
 1421035\_a\_at 0.95303 "membrane associated guanylate kinase, WW and PDZ domain containing 3"  
 Magi3  
 1421036\_at 0.90333 neuronal PAS domain protein 2 Npas2  
 1421037\_at 1.00875 neuronal PAS domain protein 2 Npas2  
 1421038\_a\_at 1.04912 "potassium intermediate/small conductance calcium-activated channel,  
 subfamily N, member 4" Kcnn4  
 1421039\_at 1.10553 major intrinsic protein of eye lens fiber Mip  
 1421040\_a\_at 0.97022 "glutathione S-transferase, alpha 2 (Yc2)" Gsta2  
 1421041\_s\_at 1.85571 "glutathione S-transferase, alpha 1 (Ya) /// glutathione S-transferase, alpha 2  
 (Yc2)" Gsta1 /// Gsta2  
 1421042\_at 1.01596 rho/rac guanine nucleotide exchange factor (GEF) 2 Arhgef2  
 1421043\_s\_at 0.97924 rho/rac guanine nucleotide exchange factor (GEF) 2 Arhgef2  
 1421044\_at 1.09571 "mannose receptor, C type 2" Mrc2  
 1421045\_at 1.01801 "mannose receptor, C type 2" Mrc2  
 1421046\_a\_at 1.03217 "poly A binding protein, cytoplasmic 4 /// similar to Poly(A) binding protein,  
 cytoplasmic 4, isoform 1" Pabpc4 /// LOC432881  
 1421047\_at 0.96505 MAD homolog 5 (*Drosophila*) Smad5  
 1421048\_a\_at 0.62127 yippee-like 1 (*Drosophila*) Ypell  
 1421049\_at 1.11461 RIKEN cDNA 0610009O20 gene 0610009O20Rik  
 1421050\_at 1.07091 vacuolar protein sorting 25 (yeast) Vps25  
 1421051\_s\_at 1.03935 vacuolar protein sorting 25 (yeast) Vps25  
 1421052\_a\_at 1.09902 spermine synthase /// similar to Spermine synthase (Spermidine  
 aminopropyltransferase) (SPMSY) Sms /// LOC671878  
 1421053\_at 0.96887 kinesin family member 1A Kif1a  
 1421054\_at 1.28294 exportin 4 Xpo4  
 1421055\_at 1.29048 large tumor suppressor 2 /// exportin 4 Lats2 /// Xpo4  
 1421056\_at 1.07677 deoxyribonuclease 1-like 3 Dnase113  
 1421057\_at 0.99846 deoxyribonuclease 1-like 3 Dnase113  
 1421058\_at 0.85104 "alcohol dehydrogenase 7 (class IV), mu or sigma polypeptide" Adh7  
 1421059\_a\_at 0.89838 "asparagine-linked glycosylation 2 homolog (yeast, alpha-1,3-  
 mannosyltransferase)" Alg2  
 1421060\_at 0.87567 myeloid/lymphoid or mixed lineage-leukemia translocation to 1 homolog  
 (*Drosophila*) Mllt1  
 1421061\_at 1.21937 guanylate cyclase activator 1a (retina) Guca1a  
 1421062\_s\_at 0.99243 "clathrin, light polypeptide (Lca)" Clta  
 1421063\_s\_at 0.99554 small nuclear ribonucleoprotein N /// SNRPN upstream reading frame  
 Snrpn /// Snurf

1421064\_at 1.04500 "membrane protein, palmitoylated 5 (MAGUK p55 subfamily member 5)"  
Mpp5

1421065\_at 0.96349 Janus kinase 2 Jak2

1421066\_at 0.95607 --- ---

1421067\_a\_at 0.94884 PHD finger protein 2 Phf2

1421068\_at 1.11014 PHD finger protein 2 Phf2

1421069\_at 0.79616 PHD finger protein 2 Phf2

1421070\_at 0.73941 "DNA segment, Chr 3, ERATO Doi 300, expressed" D3ErtD300e

1421071\_at 1.09989 von Hippel-Lindau syndrome homolog Vhlh

1421072\_at 0.95723 Iroquois related homeobox 5 (Drosophila) Irx5

1421073\_a\_at 0.94826 prostaglandin E receptor 4 (subtype EP4) Ptger4

1421074\_at 0.92259 "cytochrome P450, family 7, subfamily b, polypeptide 1" Cyp7b1

1421075\_s\_at 0.95262 "cytochrome P450, family 7, subfamily b, polypeptide 1" Cyp7b1

1421076\_at 0.85555 SERTA domain containing 3 Sertad3

1421077\_at 0.89813 SERTA domain containing 3 Sertad3

1421078\_at 0.95055 transcription factor 23 Tcf23

1421079\_at 1.04581 "nuclear receptor subfamily 4, group A, member 3" Nr4a3

1421080\_at 0.91301 "nuclear receptor subfamily 4, group A, member 3" Nr4a3

1421081\_a\_at 1.11880 barrier to autointegration factor 1 Banf1

1421082\_s\_at 1.05804 barrier to autointegration factor 1 Banf1

1421083\_x\_at 1.10646 barrier to autointegration factor 1 Banf1

1421084\_at 1.00739 retinoschisis 1 homolog (human) Rs1h

1421085\_at 1.01275 retinoschisis 1 homolog (human) Rs1h

1421086\_at 0.95937 period homolog 3 (Drosophila) Per3

1421087\_at 0.90740 period homolog 3 (Drosophila) Per3

1421088\_at 0.75616 glypican 4 Gpc4

1421089\_a\_at 1.05540 RIKEN cDNA 2610028A01 gene 2610028A01Rik

1421090\_at 0.94986 erythrocyte protein band 4.1-like 1 Epb4.111

1421091\_at 1.09259 "serine (or cysteine) peptidase inhibitor, clade A (alpha-1 antiproteinase, antitrypsin), member 12" Serpina12

1421092\_at 1.06675 "serine (or cysteine) peptidase inhibitor, clade A (alpha-1 antiproteinase, antitrypsin), member 12" Serpina12

1421093\_at 0.86869 "solute carrier family 7 (cationic amino acid transporter, y+ system), member 10" Slc7a10

1421094\_at 0.96433 zinc finger and BTB domain containing 33 Zbtb33

1421095\_a\_at 0.98323 "transient receptor potential cation channel, subfamily C, member 1" Trpc1

1421096\_at 1.01206 "transient receptor potential cation channel, subfamily C, member 1" Trpc1

1421097\_at 0.94303 endonuclease G Endog

1421098\_at 0.94867 expressed sequence AI586015 AI586015

1421099\_at 0.98819 "basic helix-loop-helix domain containing, class B3" Bhlhb3

1421100\_a\_at 0.97518 disabled homolog 1 (Drosophila) Dab1

1421101\_a\_at 0.94666 LIM domain binding 2 Ldb2

1421102\_a\_at 0.99705 vesicle-associated membrane protein 3 Vamp3

1421103\_at 0.94201 BMP2 inducible kinase Bmp2k  
 1421104\_at 0.89039 "macrophage activation 2 /// macrophage activation 2 like /// similar to  
 macrophage activation 2 /// similar to macrophage activation 2 like /// similar to macrophage activation  
 2 /// similar to guanylate binding protein family, member 6 /// similar to guanylate binding protein  
 family, member 6" Mpa2 /// Mpa2l /// LOC547126 /// LOC626578 /// LOC634650 /// LOC671219 ///  
 LOC673195  
 1421105\_at 1.06581 jagged 1 Jag1  
 1421106\_at 0.88644 jagged 1 Jag1  
 1421107\_at 1.08877 serine/threonine kinase 4 Stk4  
 1421108\_at 0.90777 camello-like 2 Cml2  
 1421109\_at 1.05822 camello-like 2 Cml2  
 1421110\_at 1.07358 Metadherin Mtdh  
 1421111\_at 0.87824 RING1 and YY1 binding protein Rybp  
 1421112\_at 1.00964 "NK2 transcription factor related, locus 2 (Drosophila)" Nkx2-2  
 1421113\_at 0.99835 "pepsinogen 5, group I" Pga5  
 1421114\_a\_at 1.03884 dermatan sulphate proteoglycan 3 Dspg3  
 1421115\_a\_at 0.96054 "zinc finger, DHHC domain containing 16" Zdhhc16  
 1421116\_a\_at 0.93395 reticulon 4 Rtn4  
 1421117\_at 0.97084 dystonin Dst  
 1421118\_a\_at 0.51927 G protein-coupled receptor 56 Gpr56  
 1421119\_at 0.93703 kinesin family member 21B Kif21b  
 1421120\_at 1.07459 myosin VI Myo6  
 1421121\_at 1.01212 A kinase (PRKA) anchor protein 10 Akap10  
 1421122\_at 0.99461 Casitas B-lineage lymphoma-like 1 Cbl1  
 1421123\_at 0.91366 "cyclin-dependent kinase 5, regulatory subunit (p35) 1" Cdk5r1  
 1421124\_at 1.01315 "cyclin-dependent kinase 5, regulatory subunit (p35) 1" Cdk5r1  
 1421125\_at 1.16951 spermatid perinuclear RNA binding protein Strbp  
 1421126\_at 0.95126 "ryanodine receptor 2, cardiac" Ryr2  
 1421127\_at 0.94835 transmembrane protein 42 Tmem42  
 1421128\_at 1.03011 "U2 small nuclear ribonucleoprotein auxiliary factor (U2AF) 1, related sequence  
 2" U2af1-rs2  
 1421129\_a\_at 0.92008 "ATPase, Ca++ transporting, ubiquitous" Atp2a3  
 1421130\_at 0.90806 zinc finger protein 111 Zfp111  
 1421131\_a\_at 0.76347 zinc finger protein 111 Zfp111  
 1421132\_at 0.78391 poliovirus receptor-related 3 Pvr13  
 1421133\_at 1.13443 poliovirus receptor-related 3 Pvr13  
 1421134\_at 1.01317 amphiregulin Areg  
 1421135\_a\_at 1.03076 "CCR4-NOT transcription complex, subunit 8" Cnot8  
 1421136\_at 0.80140 endothelin 3 Edn3  
 1421137\_a\_at 1.11963 "protein kinase inhibitor beta, cAMP dependent, testis specific" Pkib  
 1421138\_a\_at 1.11031 "protein kinase inhibitor beta, cAMP dependent, testis specific" Pkib  
 1421139\_a\_at 1.03560 zinc finger protein 386 (Kruppel-like) Zfp386  
 1421140\_a\_at 0.88106 forkhead box P1 Foxp1



1421141\_a\_at 0.89077 forkhead box P1 Foxp1  
1421142\_s\_at 0.96846 forkhead box P1 Foxp1  
1421143\_at 1.07714 diaphanous homolog 1 (Drosophila) Diap1  
1421144\_at 0.99710 retinitis pigmentosa GTPase regulator interacting protein 1 Rpgrip1  
1421145\_at 0.99554 "solute carrier family 26 (sulfate transporter), member 2" Slc26a2  
1421146\_at 1.24541 Rap guanine nucleotide exchange factor (GEF) 1 Rapgef1  
1421147\_at 0.84601 telomeric repeat binding factor 2 Terf2  
1421148\_a\_at 1.10993 Tial1 cytotoxic granule-associated RNA binding protein-like 1 Tial1  
1421149\_a\_at 0.97856 atrophin 1 Atn1  
1421150\_at 1.00195 human immunodeficiency virus type I enhancer binding protein 3 Hivep3  
1421151\_a\_at 1.12402 Eph receptor A2 Epha2  
1421152\_a\_at 0.68773 "guanine nucleotide binding protein, alpha o" Gnao1  
1421153\_at 1.16225 lysyl oxidase-like 4 Loxl4  
1421154\_at 0.91784 "hyperpolarization-activated, cyclic nucleotide-gated K+ 2" Hcn2  
1421155\_at 1.03971 "UDP-Gal:betaGal beta 1,3-galactosyltransferase, polypeptide 6" B3galt6  
1421156\_a\_at 1.00202 desmocollin 2 Dsc2  
1421157\_at 1.14533 frizzled homolog 3 (Drosophila) Fzd3  
1421158\_at 1.01182 cingulin-like 1 Cgnl1  
1421159\_at 1.00981 cingulin-like 1 /// similar to cingulin-like 1 isoform 1 Cgnl1 /// LOC677485  
1421160\_a\_at 0.98744 radical fringe gene homolog (Drosophila) Rfng  
1421161\_at 1.03351 "betacellulin, epidermal growth factor family member" Btc  
1421162\_a\_at 0.93080 nuclear factor I/A Nfia  
1421163\_a\_at 0.83825 nuclear factor I/A Nfia  
1421164\_a\_at 0.88139 Rho guanine nucleotide exchange factor (GEF) 1 Arhgef1  
1421165\_at 0.85542 c-myc binding protein Mycbp  
1421166\_at 0.95084 attractin Atrn  
1421167\_at 0.99383 "ATPase, class VI, type 11A" Atp11a  
1421168\_at 0.98700 "ATP-binding cassette, sub-family G (WHITE), member 3" Abcg3  
1421169\_at 1.11432 zinc finger protein 46 Zfp46  
1421170\_a\_at 1.01289 "phospholipase C, beta 1" Plcb1  
1421171\_at 0.95901 a disintegrin and metallopeptidase domain 12 (meltrin alpha) Adam12  
1421172\_at 0.77663 a disintegrin and metallopeptidase domain 12 (meltrin alpha) Adam12  
1421173\_at 1.08202 interferon regulatory factor 4 Irf4  
1421174\_at 0.93544 interferon regulatory factor 4 Irf4  
1421175\_at 1.00119 myelin transcription factor 1-like Myt1l  
1421176\_at 0.83306 RAS guanyl releasing protein 1 Rasgrp1  
1421177\_at 0.90559 "THAP domain containing, apoptosis associated protein 2" Thap2  
1421178\_at 0.96569 "mannosyl (alpha-1,3-)-glycoprotein beta-1,4-N-acetylglucosaminyltransferase, isozyme C (putative)" Mgat4c  
1421179\_at 1.29155 tweety homolog 2 (Drosophila) Ttyh2  
1421180\_at 0.92461 limb expression 1 homolog (chicken) Lix1  
1421181\_at 1.20846 neuronal pentraxin receptor Nptxr  
1421182\_at 1.06111 "C-type lectin domain family 1, member b" Clec1b

1421183\_at 0.82470 testis expressed gene 12 Tex12  
1421184\_a\_at 0.95669 methyltransferase like 7A /// UbiE-YGHL1 fusion protein /// UbiE-YGHL1 fusion protein Mettl7a /// Ubie /// LOC554292  
1421185\_at 0.81547 methyltransferase like 7A Mettl7a  
1421186\_at 1.05732 chemokine (C-C motif) receptor 2 Ccr2  
1421187\_at 0.95737 chemokine (C-C motif) receptor 2 Ccr2  
1421188\_at 0.98504 chemokine (C-C motif) receptor 2 Ccr2  
1421189\_at 1.08836 "gamma-aminobutyric acid (GABA-A) receptor, subunit beta 3" Gabrb3  
1421190\_at 0.92749 "gamma-aminobutyric acid (GABA-A) receptor, subunit beta 3" Gabrb3  
1421191\_s\_at 1.11354 golgi associated PDZ and coiled-coil motif containing Gopc  
1421192\_a\_at 0.98889 intersectin 1 (SH3 domain protein 1A) Itsn1  
1421193\_a\_at 0.99366 pre B-cell leukemia transcription factor 3 Pbx3  
1421194\_at 0.92744 integrin alpha 4 Itga4  
1421195\_at 0.98720 cholecystokinin A receptor Cckar  
1421196\_at 0.98871 "protein tyrosine phosphatase, non-receptor type 11" Ptpn11  
1421197\_a\_at 1.05151 apoptotic chromatin condensation inducer 1 Acin1  
1421198\_at 0.88899 integrin alpha V Itgav  
1421199\_at 1.11967 "discs, large homolog 2 (Drosophila)" Dlgh2  
1421200\_at 0.94456 "discs, large homolog 2 (Drosophila)" Dlgh2  
1421201\_a\_at 0.89566 trophinin Tro  
1421202\_at 0.97628 "cholinergic receptor, nicotinic, alpha polypeptide 4" Chrna4  
1421203\_at 1.01436 "cholinergic receptor, nicotinic, alpha polypeptide 4" Chrna4  
1421204\_a\_at 0.86430 nudix (nucleoside diphosphate linked moiety X)-type motif 16 Nudt16  
1421205\_at 1.37856 ataxia telangiectasia mutated homolog (human) Atm  
1421206\_at 0.89041 leukemia inhibitory factor Lif  
1421207\_at 1.48106 leukemia inhibitory factor Lif  
1421208\_at 0.94360 inhibitor of kappaB kinase gamma Ikbkg  
1421209\_s\_at 0.93812 inhibitor of kappaB kinase gamma Ikbkg  
1421210\_at 0.99602 class II transactivator C2ta  
1421211\_a\_at 1.07158 class II transactivator C2ta  
1421212\_at 0.91271 "ATP-binding cassette, sub-family C (CFTR/MRP), member 6" Abcc6  
1421213\_at 1.05555 EDAR (ectodysplasin-A receptor)-associated death domain Edaradd  
1421214\_at 0.94727 cytidine monophospho-N-acetylneuraminic acid hydroxylase Cmah  
1421215\_a\_at 1.06027 sarcolemma associated protein Smap  
1421216\_a\_at 0.81675 iduronate 2-sulfatase Ids  
1421217\_a\_at 1.08587 "lectin, galactose binding, soluble 9" Lgals9  
1421218\_at 1.06479 butyrylcholinesterase Bche  
1421219\_at 0.96319 "tubulin tyrosine ligase-like family, member 3" Ttl3  
1421220\_at 0.98637 ankyrin repeat domain 17 Ankrd17  
1421221\_at 0.86658 "beta-carotene 9', 10'-dioxygenase 2" Bcdo2  
1421222\_at 0.94031 FIP1 like 1 (S. cerevisiae) Fip111  
1421223\_a\_at 1.05763 annexin A4 Anxa4  
1421224\_a\_at 0.94655 transcription factor 2 Tcf2

1421225\_a\_at 1.13830 "solute carrier family 4 (anion exchanger), member 4" Slc4a4  
1421226\_at 0.96356 triggering receptor expressed on myeloid cells 2 Trem2  
1421227\_at 1.20754 granzyme E Gzme  
1421228\_at 1.17972 chemokine (C-C motif) ligand 7 Ccl7  
1421229\_at 1.02325 "DNA fragmentation factor, beta subunit" Dffb  
1421230\_a\_at 0.97711 Musashi homolog 2 (Drosophila) Msi2  
1421231\_at 0.90764 Musashi homolog 2 (Drosophila) Msi2  
1421232\_at 0.98395 plexin A1 Plxna1  
1421233\_at 0.87315 Pbx/knotted 1 homeobox Pknox1  
1421234\_at 0.91125 transcription factor 1 Tcf1  
1421235\_s\_at 0.85220 RecQ protein-like 5 Recql5  
1421236\_at 1.12725 receptor (TNFRSF)-interacting serine-threonine kinase 2 Ripk2  
1421237\_at 0.83984 thymopoietin Tmpo  
1421238\_a\_at 0.84454 "protein tyrosine phosphatase, receptor type, T" Ptprt  
1421239\_at 0.91015 interleukin 6 signal transducer Il6st  
1421240\_at 0.98254 endoplasmic reticulum (ER) to nucleus signalling 1 Ern1  
1421241\_at 1.08104 "nerve growth factor receptor (TNFR superfamily, member 16)" Ngfr  
1421242\_at 1.13499 ring finger protein 144 Rnf144  
1421243\_at 0.92698 ring finger protein 144 Rnf144  
1421244\_at 1.06545 estrogen receptor 1 (alpha) Esr1  
1421245\_at 0.93400 sclerostin Sost  
1421246\_at 0.98404 paired box gene 9 Pax9  
1421247\_at 1.10879 paired box gene 9 Pax9  
1421248\_at 0.95686 synapsin III Syn3  
1421249\_at 1.10415 "similar to solute carrier family 39 (zinc transporter), member 9" LOC674308  
1421250\_at 0.99302 "similar to solute carrier family 39 (zinc transporter), member 9" LOC674308  
1421251\_at 0.93853 zinc finger protein 40 Zfp40  
1421252\_a\_at 0.81696 myocyte enhancer factor 2A Mef2a  
1421253\_at 1.11011 nebulin-related anchoring protein Nrap  
1421254\_a\_at 0.98435 "sarcoglycan, gamma (dystrophin-associated glycoprotein)" Sgcg  
1421255\_a\_at 0.98904 calcium binding protein 1 Cabp1  
1421256\_at 1.04587 granzyme C Gzmc  
1421257\_at 1.08024 "phosphatidylinositol glycan anchor biosynthesis, class B" Pigb  
1421258\_a\_at 0.91699 pyruvate kinase liver and red blood cell Pklr  
1421259\_at 0.92953 pyruvate kinase liver and red blood cell Pklr  
1421260\_a\_at 1.04523 spermidine synthase Srm  
1421261\_at 0.94329 "lipase, endothelial" Lipg  
1421262\_at 1.12562 "lipase, endothelial" Lipg  
1421263\_at 0.99301 "gamma-aminobutyric acid (GABA-A) receptor, subunit alpha 3" Gabra3  
1421264\_at 0.97541 butyrophilin related 1 Butr1  
1421265\_a\_at 1.06472 RNA binding motif protein 38 Rbm38  
1421266\_s\_at 1.09531 "nuclear factor of kappa light chain gene enhancer in B-cells inhibitor, beta"  
Nfkbib

1421267\_a\_at 0.90660 "Cbp/p300-interacting transactivator, with Glu/Asp-rich carboxy-terminal domain, 2" Cited2

1421268\_at 1.00546 UDP-glucose ceramide glucosyltransferase Ugcg

1421269\_at 1.11828 UDP-glucose ceramide glucosyltransferase Ugcg

1421270\_at 1.10341 SH3 domain containing ring finger 1 Sh3rf1

1421271\_at 1.09247 SH3 domain containing ring finger 1 Sh3rf1

1421272\_at 0.94884 Vav2 oncogene Vav2

1421273\_at 0.95423 suppressor of cytokine signaling 4 Socs4

1421274\_at 0.99918 suppressor of cytokine signaling 4 Socs4

1421275\_s\_at 0.92498 suppressor of cytokine signaling 4 Socs4

1421276\_a\_at 0.97921 dystonin Dst

1421277\_at 0.64078 spectrin alpha 1 /// similar to spectrin alpha 1 Spna1 /// LOC630963

1421278\_s\_at 0.94835 similar to spectrin alpha 1 LOC630963

1421279\_at 1.22320 "laminin, gamma 2" Lamc2

1421280\_at 1.03673 "gamma-aminobutyric acid (GABA-A) receptor, subunit alpha 1" Gabra1

1421281\_at 1.10628 "gamma-aminobutyric acid (GABA-A) receptor, subunit alpha 1" Gabra1

1421282\_at 1.06589 bone morphogenetic protein 5 Bmp5

1421283\_at 0.97084 bone morphogenetic protein 5 Bmp5

1421284\_at 0.92452 "phosphatidylinositol glycan anchor biosynthesis, class N" Pign

1421285\_at 1.06677 phosphoinositide-3-kinase adaptor protein 1 Pik3ap1

1421286\_a\_at 0.87113 "ATPase, H+/K+ exchanging, gastric, alpha polypeptide" Atp4a

1421287\_a\_at 0.95087 platelet/endothelial cell adhesion molecule 1 Pecam1

1421288\_at 0.90899 coagulation factor II (thrombin) receptor-like 3 F2rl3

1421289\_at 1.05674 "heat shock protein family, member 7 (cardiovascular)" Hspb7

1421290\_at 0.97679 "heat shock protein family, member 7 (cardiovascular)" Hspb7

1421291\_at 1.01125 interleukin 18 receptor accessory protein Il18rap

1421292\_a\_at 0.89268 RIKEN cDNA A730008L03 gene A730008L03Rik

1421293\_at 1.01567 hepatoma derived growth factor-like 1 Hdgfl1

1421294\_at 0.81060 hepatoma derived growth factor-like 1 Hdgfl1

1421295\_at 0.92653 chordin-like 1 Chrdl1

1421296\_at 1.22070 "tumor necrosis factor receptor superfamily, member 10b" Tnfrsf10b

1421297\_a\_at 0.84397 "calcium channel, voltage-dependent, L type, alpha 1C subunit" Cacna1c

1421298\_a\_at 0.87302 homeodomain interacting protein kinase 1 Hipk1

1421299\_a\_at 0.92304 lymphoid enhancer binding factor 1 Lef1

1421300\_at 0.92907 "adenosine deaminase, RNA-specific, B2" Adarb2

1421301\_at 1.03593 Zic finger protein of the cerebellum 2 Zic2

1421302\_a\_at 0.91592 "guanine nucleotide binding protein, alpha 15" Gna15

1421303\_at 1.01516 "zinc finger protein, subfamily 1A, 1 (Ikaros)" Zfpn1a1

1421304\_at 1.06277 "killer cell lectin-like receptor, subfamily A, member 2" Klra2

1421305\_x\_at 1.00364 "rabaptin, RAB GTPase binding effector protein 1" Rabep1

1421306\_a\_at 1.02067 histone deacetylase 9 Hdac9

1421307\_at 1.13040 carbonic anhydrase 13 Car13

1421308\_at 1.04355 carbonic anhydrase 13 Car13

1421309\_at 0.98440 O-6-methylguanine-DNA methyltransferase Mgmt  
 1421310\_at 0.94718 RIKEN cDNA 4921517D21 gene 4921517D21Rik  
 1421311\_at 0.90649 protocadherin 10 Pcdh10  
 1421312\_a\_at 0.88987 kinesin family member C2 Kifc2  
 1421313\_s\_at 1.02774 cortactin Ctn  
 1421314\_at 1.10364 cortactin Ctn  
 1421315\_s\_at 0.97751 cortactin Ctn  
 1421316\_at 0.87496 RIKEN cDNA 1110058A15 gene 1110058A15Rik  
 1421317\_x\_at 0.95994 myeloblastosis oncogene Myb  
 1421318\_at 0.92133 N-deacetylase/N-sulfotransferase (heparin glucosaminyl) 4 Ndst4  
 1421319\_at 0.87912 prostaglandin F2 receptor negative regulator Ptgfrn  
 1421320\_a\_at 1.06435 queuine tRNA-ribosyltransferase domain containing 1 Qtrtd1  
 1421321\_a\_at 0.93480 neuroepithelial cell transforming gene 1 Net1  
 1421322\_a\_at 0.99704 interferon dependent positive acting transcription factor 3 gamma Isgf3g  
 1421323\_a\_at 1.06981 RIKEN cDNA E430034L04 gene E430034L04Rik  
 1421324\_a\_at 0.93485 thymoma viral proto-oncogene 2 Akt2  
 1421325\_at 1.10247 "phospholipase A2, group IIF" Pla2g2f  
 1421326\_at 1.03267 "colony stimulating factor 2 receptor, beta 1, low-affinity (granulocyte-macrophage)" Csf2rb1  
 1421327\_at 0.82817 microtubule-associated protein 2 /// hypothetical protein A730034C02  
 Mtap2 /// A730034C02  
 1421328\_at 0.86946 microtubule-associated protein 2 /// hypothetical protein A730034C02  
 Mtap2 /// A730034C02  
 1421329\_a\_at 0.92987 SET and MYND domain containing 1 Smyd1  
 1421330\_at 1.08398 "protein tyrosine phosphatase, non-receptor type 4" Ptpn4  
 1421331\_at 0.83832 heparan sulfate (glucosamine) 3-O-sulfotransferase 3B1 Hs3st3b1  
 1421332\_at 0.94561 heparan sulfate (glucosamine) 3-O-sulfotransferase 3B1 Hs3st3b1  
 1421333\_a\_at 0.86967 myoneurin Mynn  
 1421334\_x\_at 0.85859 myoneurin Mynn  
 1421335\_a\_at 0.99247 EGF-like domain 7 Egfl7  
 1421336\_at 0.98797 prospero-related homeobox 1 Prox1  
 1421337\_at 0.90607 E74-like factor 4 (ets domain transcription factor) Elf4  
 1421338\_at 1.01589 E74-like factor 4 (ets domain transcription factor) /// hypothetical protein  
 LOC676319 Elf4 /// LOC676319  
 1421339\_at 1.07934 exostoses (multiple)-like 3 Extl3  
 1421340\_at 0.66197 mitogen activated protein kinase kinase kinase 5 /// similar to mitogen activated  
 protein kinase kinase kinase 5 Map3k5 /// LOC675366  
 1421341\_at 0.91566 axin2 Axin2  
 1421342\_at 1.09981 "K+ voltage-gated channel, subfamily S, 2" Kcns2  
 1421343\_at 1.02720 BTB and CNC homology 2 Bach2  
 1421344\_a\_at 1.03301 ajuba Jub  
 1421345\_at 0.96473 lecithin-retinol acyltransferase (phosphatidylcholine-retinol-O-acyltransferase) Lrat

1421346\_a\_at 1.20363 "solute carrier family 6 (neurotransmitter transporter, taurine), member 6" Slc6a6

1421347\_at 0.94149 ferritin mitochondrial Ftmt

1421348\_a\_at 1.05217 cell cycle exit and neuronal differentiation 1 Cend1

1421349\_x\_at 1.00323 cell cycle exit and neuronal differentiation 1 Cend1

1421350\_a\_at 0.85527 glutamate receptor interacting protein 1 Grip1

1421351\_at 1.08615 "glutamate receptor, ionotropic, AMPA4 (alpha 4)" Gria4

1421352\_at 0.93919 toll-like receptor 6 Tlr6

1421353\_at 1.03917 phosphodiesterase 7B Pde7b

1421354\_at 0.92236 "protein kinase, cGMP-dependent, type II" Prkg2

1421355\_at 0.97651 "transglutaminase 3, E polypeptide" Tgm3

1421356\_at 1.06655 testis expressed gene 9 Tex9

1421357\_at 1.02364 "general transcription factor II A, 1" Gtf2a1

1421358\_at 1.10300 "histocompatibility 2, M region locus 3" H2-M3

1421359\_at 1.02397 ret proto-oncogene Ret

1421360\_at 0.92122 "inositol polyphosphate-4-phosphatase, type I" Inpp4a

1421361\_at 0.89687 G protein-coupled receptor kinase 1 Grk1

1421362\_a\_at 1.07128 fyn-related kinase Frk

1421363\_at 0.95058 "cytochrome P450, family 2, subfamily c, polypeptide 39" Cyp2c39

1421364\_at 0.84329 leucine rich repeat and fibronectin type III domain containing 1 Lfn1

1421365\_at 0.93067 follistatin Fst

1421366\_at 0.90620 "C-type lectin domain family 5, member a" Clec5a

1421367\_at 0.87841 RIKEN cDNA 4930549C01 gene 4930549C01Rik

1421368\_at 1.04626 "scratch homolog 1, zinc finger protein (Drosophila)" Sqrt1

1421369\_a\_at 0.88891 mab-21-like 1 (C. elegans) Mab21l1

1421370\_a\_at 0.82083 "interleukin 1 family, member 5 (delta)" Il1f5

1421371\_at 0.95571 --- ---

1421372\_at 1.03799 kallikrein 1-related peptidase b4 Klk1b4

1421373\_at 1.00951 cytochrome c oxidase subunit IV isoform 2 Cox4i2

1421374\_a\_at 0.86174 FXFD domain-containing ion transport regulator 1 Fxyd1

1421375\_a\_at 1.12175 S100 calcium binding protein A6 (calcylin) S100a6

1421376\_at 1.13966 Tnf receptor-associated factor 6 Traf6

1421377\_at 0.76199 Tnf receptor-associated factor 6 Traf6

1421378\_s\_at 1.14766 "ATP-binding cassette, sub-family C (CFTR/MRP), member 1" Abcc1

1421379\_at 0.96383 zinc finger protein 354B Zfp354b

1421380\_at 0.91513 insulin receptor Insr

1421381\_a\_at 0.98103 "procollagen, type IX, alpha 1" Col9a1

1421382\_at 0.93795 prolactin receptor Prlr

1421383\_at 1.16744 coiled-coil domain containing 82 Ccdc82

1421384\_at 0.66355 lysosomal trafficking regulator Lyst

1421385\_a\_at 0.63885 myosin VIIa Myo7a

1421386\_at 1.18450 ankyrin repeat domain 6 Ankrd6

1421387\_at 1.02880 kringle containing transmembrane protein 1 Kremen1

1421388\_at 0.92872 myocyte enhancer factor 2D Mef2d  
1421389\_a\_at 0.96116 eukaryotic translation initiation factor 2 alpha kinase 4 Eif2ak4  
1421390\_at 0.99451 "solute carrier family 12, member 1" Slc12a1  
1421391\_at 1.07612 vasoactive intestinal peptide receptor 2 Vipr2  
1421392\_a\_at 1.20644 baculoviral IAP repeat-containing 3 Birc3  
1421393\_at 0.99553 "glutamate receptor, ionotropic, NMDA2D (epsilon 4)" Grin2d  
1421394\_a\_at 0.87611 baculoviral IAP repeat-containing 4 Birc4  
1421395\_at 0.92524 zinc finger protein interacting with K protein 1 Zik1  
1421396\_at 0.84357 proprotein convertase subtilisin/kexin type 1 Pcsk1  
1421397\_a\_at 1.16216 leucine-rich and death domain containing Lrdd  
1421398\_at 1.01581 tripartite motif protein 7 Trim7  
1421399\_at 0.99758 insulinoma-associated 1 Insm1  
1421400\_at 1.11572 "potassium large conductance calcium-activated channel, subfamily M, beta member 1" Kcnmb1  
1421401\_at 0.96040 "Potassium large conductance calcium-activated channel, subfamily M, beta member 1" Kcnmb1  
1421402\_at 0.84516 metastasis associated 3 Mta3  
1421403\_at 1.16836 peptidase inhibitor 15 Pi15  
1421404\_at 1.08856 chemokine (C-X-C motif) ligand 15 Cxcl15  
1421405\_at 0.99303 "zinc finger, imprinted 1" Zim1  
1421406\_at 0.95686 --- ---  
1421407\_at 1.09950 coagulation factor II (thrombin) receptor-like 2 F2rl2  
1421408\_at 1.07983 "immunoglobulin superfamily, member 6" Igsf6  
1421409\_at 1.04654 Musashi homolog 1(Drosophila) Msi1  
1421410\_a\_at 0.93336 proline-serine-threonine phosphatase-interacting protein 2 Pstpip2  
1421411\_at 1.14571 proline-serine-threonine phosphatase-interacting protein 2 Pstpip2  
1421412\_at 0.98243 gooseoid Gsc  
1421413\_a\_at 0.86799 PDZ and LIM domain 5 /// similar to PDZ and LIM domain protein 5 (Enigma homolog) (Enigma-like PDZ and LIM domains protein) Pdlim5 /// LOC669660  
1421414\_a\_at 0.92486 "sema domain, transmembrane domain (TM), and cytoplasmic domain, (semaphorin) 6A" Sema6a  
1421415\_s\_at 0.89229 "glucosaminyl (N-acetyl) transferase 2, I-branching enzyme" Gcnt2  
1421416\_at 0.96849 mitogen activated protein kinase kinase 7 Map2k7  
1421417\_s\_at 1.13297 elaC homolog 1 (E. coli) Elac1  
1421418\_a\_at 0.91789 pregnancy specific glycoprotein 19 Psg19  
1421419\_at 0.90384 "potassium channel, subfamily K, member 4" Kcnk4  
1421420\_at 1.02336 chemokine (C-C motif) receptor 10 Ccr10  
1421421\_at 0.95468 angiopoietin-like 1 Angpt1  
1421422\_at 0.89174 cDNA sequence AF397014 AF397014  
1421423\_at 0.88512 prolactin-like protein O Prlpo  
1421424\_a\_at 0.82477 alanyl (membrane) aminopeptidase Anpep  
1421425\_a\_at 0.92231 Down syndrome critical region gene 1-like 1 Dscr111  
1421426\_at 0.99152 Hedgehog-interacting protein Hhip

|              |         |                                                                                 |           |
|--------------|---------|---------------------------------------------------------------------------------|-----------|
| 1421427_at   | 0.98670 | "procollagen, type XXV, alpha 1"                                                | Col25a1   |
| 1421428_at   | 1.09780 | "solute carrier family 5 (choline transporter), member 7"                       | Slc5a7    |
| 1421429_a_at | 0.71617 | nephronectin                                                                    | Npnt      |
| 1421430_at   | 0.96375 | RAD51-like 1 (S. cerevisiae)                                                    | Rad5111   |
| 1421431_at   | 1.07243 | polymerase I and transcript release factor                                      | Ptrf      |
| 1421432_at   | 0.93698 | ADP-ribosylation factor-like 10                                                 | Arl10     |
| 1421433_at   | 0.89336 | zinc finger homeodomain 4                                                       | Zfhx4     |
| 1421434_at   | 1.01933 | "dynein, axonemal, heavy chain 5"                                               | Dnahc5    |
| 1421435_at   | 1.06025 | "glutamate receptor, ionotropic, delta 2"                                       | Grid2     |
| 1421436_at   | 0.94296 | "glutamate receptor, ionotropic, delta 2"                                       | Grid2     |
| 1421437_x_at | 0.90448 | protocadherin beta 14                                                           | Pcdhb14   |
| 1421438_at   | 1.03269 | ---                                                                             | ---       |
| 1421439_at   | 1.08513 | wingless related MMTV integration site 8b                                       | Wnt8b     |
| 1421440_at   | 0.91275 | similar to wingless related MMTV integration site 8b                            | LOC677060 |
| 1421441_at   | 0.91840 | angiopoietin 1                                                                  | Angpt1    |
| 1421442_at   | 1.28954 | FMS-like tyrosine kinase 4                                                      | Flt4      |
| 1421443_at   | 0.99144 | G protein-coupled receptor 110                                                  | Gpr110    |
| 1421444_at   | 0.89884 | progesterone receptor                                                           | Pgr       |
| 1421445_at   | 1.01042 | "solute carrier family 26, member 3"                                            | Slc26a3   |
| 1421446_at   | 1.11121 | "protein kinase C, gamma"                                                       | Prkcc     |
| 1421447_at   | 1.02377 | "one cut domain, family member 1"                                               | Onecut1   |
| 1421448_at   | 0.79597 | GTPase activating RANGAP domain-like 1                                          | Garnl1    |
| 1421449_at   | 1.06072 | CUB and Sushi multiple domains 1                                                | Csmd1     |
| 1421450_a_at | 0.97383 | mitogen activated protein kinase kinase kinase 4                                | Map3k4    |
| 1421451_at   | 0.96751 | crumbs homolog 1 (Drosophila)                                                   | Crb1      |
| 1421452_at   | 0.85401 | cell adhesion molecule-related/down-regulated by oncogenes                      | Cdon      |
| 1421453_at   | 0.98780 | junctionophilin 2                                                               | Jph2      |
| 1421454_at   | 0.89322 | zinc finger protein 108                                                         | Zfp108    |
| 1421455_at   | 0.84985 | "syntrophin, basic 1"                                                           | Sntb1     |
| 1421456_at   | 0.80503 | "purinergic receptor P2Y, G-protein coupled 1"                                  | P2ry1     |
| 1421457_a_at | 0.90882 | "SAM domain, SH3 domain and nuclear localization signals, 1"                    | Samsn1    |
| 1421458_at   | 0.90301 | zinc finger protein 112                                                         | Zfp112    |
| 1421459_a_at | 0.97470 | "low density lipoprotein receptor-related protein 8, apolipoprotein e receptor" | Lrp8      |
| 1421460_at   | 0.92742 | desmocollin 1                                                                   | Dsc1      |
| 1421461_at   | 0.99956 | myeloproliferative leukemia virus oncogene                                      | Mpl       |
| 1421462_a_at | 0.83733 | leprecan 1                                                                      | Lepre1    |
| 1421463_at   | 1.05715 | sialic acid binding Ig-like lectin E                                            | Siglece   |
| 1421464_at   | 0.95539 | bagpipe homeobox gene 1 homolog (Drosophila)                                    | Bapx1     |
| 1421465_at   | 0.68140 | wingless related MMTV integration site 2b                                       | Wnt2b     |
| 1421466_at   | 1.02936 | ankyrin repeat and SOCS box-containing protein 10                               | Asb10     |
| 1421467_at   | 0.88612 | runt related transcription factor 3                                             | Runx3     |
| 1421468_at   | 0.86445 | "potassium inwardly-rectifying channel, subfamily J, member 3"                  | Kcnj3     |



1421469\_a\_at 0.98031 signal transducer and activator of transcription 5A Stat5a  
1421470\_at 1.02532 gastrin releasing peptide receptor Grpr  
1421471\_at 1.04320 neuropeptide Y receptor Y1 Npy1r  
1421472\_at 1.02741 RIKEN cDNA 2900083I11 gene 2900083I11Rik  
1421473\_at 0.89519 interleukin 1 alpha Il1a  
1421474\_a\_at 0.90407 splA/ryanodine receptor domain and SOCS box containing 1 Spsb1  
1421475\_at 0.96578 "membrane-spanning 4-domains, subfamily A, member 2" Ms4a2  
1421476\_a\_at 0.91465 calcium activated nucleotidase 1 Cant1  
1421477\_at 0.92550 complexin 2 Cplx2  
1421478\_a\_at 1.00316 zinc finger protein 318 Zfp318  
1421479\_at 0.89881 zinc finger protein 318 Zfp318  
1421480\_a\_at 1.02000 "adenosine deaminase, RNA-specific, B1" Adarb1  
1421481\_at 0.96306 "tumor necrosis factor receptor superfamily, member 9" Tnfrsf9  
1421482\_at 0.89942 "Bartter syndrome, infantile, with sensorineural deafness (Barttin)" Bsnd  
1421483\_at 1.09527 LIM homeobox protein 4 Lhx4  
1421484\_at 0.98725 "UDP glucuronosyltransferase 2 family, polypeptide A1 /// UDP  
glucuronosyltransferase 2 family, polypeptide A2" Ugt2a1 /// Ugt2a2  
1421485\_at 1.05055 tau tubulin kinase 2 Ttbk2  
1421486\_at 0.92898 early growth response 3 Egr3  
1421487\_a\_at 1.07438 non-catalytic region of tyrosine kinase adaptor protein 1 Nck1  
1421488\_at 1.00012 RAB GTPase activating protein 1-like Rabgap11  
1421489\_a\_at 1.00430 RIKEN cDNA 2010106E10 gene 2010106E10Rik  
1421490\_at 0.92928 proline-rich protein MP5 /// cDNA sequence BC061494 Prpmp5 /// BC061494  
1421491\_a\_at 0.92121 transmembrane protein 49 Tmem49  
1421492\_at 1.06059 "prostaglandin D2 synthase 2, hematopoietic" Ptgds2  
1421493\_a\_at 0.96118 regulator of G-protein signaling 20 Rgs20  
1421494\_at 0.90217 RIKEN cDNA 1110033F04 gene 1110033F04Rik  
1421495\_a\_at 1.04619 RIKEN cDNA 1700052N19 gene 1700052N19Rik  
1421496\_at 1.01723 N-acylsphingosine amidohydrolase 3-like Asah3l  
1421497\_at 0.89454 glycoprotein hormone alpha 2 Gpha2  
1421498\_a\_at 1.31511 RIKEN cDNA 2010204K13 gene 2010204K13Rik  
1421499\_a\_at 1.06987 "protein tyrosine phosphatase, non-receptor type 14" Ptpn14  
1421500\_at 1.00457 steroid sulfatase Sts  
1421501\_a\_at 0.86818 ELKS/RAB6-interacting/CAST family member 1 Erc1  
1421502\_at 0.96738 ubiquitin specific peptidase 26 Usp26  
1421503\_at 0.79616 protocadherin 15 Pcdh15  
1421504\_at 0.98478 trans-acting transcription factor 4 Sp4  
1421505\_at 0.96142 Mix1 homeobox-like 1 (Xenopus laevis) Mixl1  
1421506\_at 0.98589 olfactory receptor 78 Olfr78  
1421507\_at 1.01057 olfactory receptor 78 Olfr78  
1421508\_at 0.91355 odd Oz/ten-m homolog 1 (Drosophila) Odz1  
1421509\_at 0.96094 VPS10 domain receptor protein SORCS 1 Sorcs1  
1421510\_at 0.96959 "protease, serine, 7 (enterokinase)" Prss7

1421511\_at 0.94241 integrin beta 3 Itgb3  
1421512\_at 0.97700 centrosomal protein 250 Cep250  
1421513\_at 0.95908 tudor domain containing 1 Tdrd1  
1421514\_a\_at 0.96087 sex comb on midleg-like 2 (Drosophila) Scml2  
1421515\_at 0.90303 "nuclear receptor subfamily 6, group A, member 1" Nr6a1  
1421516\_at 0.98290 "nuclear receptor subfamily 6, group A, member 1" Nr6a1  
1421517\_at 1.01228 "ST6 (alpha-N-acetyl-neuraminyl-2,3-beta-galactosyl-1,3)-N-acetylgalactosaminide alpha-2,6-sialyltransferase 1" St6galnac1  
1421518\_at 1.11829 "K+ voltage-gated channel, subfamily S, 1" Kcns1  
1421519\_a\_at 0.89156 zinc finger protein 120 Zfp120  
1421520\_at 0.95472 junctophilin 1 Jph1  
1421521\_at 0.99035 RIKEN cDNA 4930430A15 gene 4930430A15Rik  
1421522\_at 0.99608 "beta-1,4-N-acetyl-galactosaminyl transferase 2" B4galnt2  
1421523\_at 1.07270 fibroblast growth factor 17 Fgf17  
1421524\_at 0.95151 "cripto, FRL-1, cryptic family 1" Cfc1  
1421525\_a\_at 1.03583 baculoviral IAP repeat-containing 1e Birc1e  
1421526\_at 1.03119 tolloid-like 2 Tll2  
1421527\_at 0.92504 Eph receptor A6 Epha6  
1421528\_a\_at 0.92118 surfeit gene 5 Surf5  
1421529\_a\_at 0.97644 thioredoxin reductase 1 Txnrd1  
1421530\_a\_at 1.11235 "glutamate receptor, metabotropic 8" Grm8  
1421531\_at 1.03261 A kinase (PRKA) anchor protein 3 Akap3  
1421532\_at 0.94099 relaxin/insulin-like family peptide receptor 2 Rxfp2  
1421533\_at 1.02881 "solute carrier family 7 (cationic amino acid transporter, y+ system), member 1" Slc7a1  
1421534\_at 0.89665 "deafness, autosomal dominant 5 homolog (human)" Dfna5h  
1421535\_a\_at 1.03689 "phosphodiesterase 4A, cAMP specific" Pde4a  
1421536\_at 0.97630 "gamma-aminobutyric acid (GABA-A) receptor, subunit theta" Gabrq  
1421537\_at 0.85807 homeo box D3 Hoxd3  
1421538\_at 1.00332 "potassium voltage-gated channel, Shal-related family, member 1" Kcnd1  
1421539\_at 1.16747 zinc finger protein of the cerebellum 4 Zic4  
1421540\_at 0.93126 testicular cell adhesion molecule 1 Tcam1  
1421541\_a\_at 0.86606 myocyte enhancer factor 2B Mef2b  
1421542\_at 0.91983 DAZ interacting protein 1 Dzip1  
1421543\_at 0.96621 F-box only protein 4 Fbxo4  
1421544\_at 0.92101 "dynein, axonemal, heavy chain 11" Dnahc11  
1421545\_a\_at 0.88049 synaptic nuclear envelope 1 Syne1  
1421546\_a\_at 0.92722 Rac GTPase-activating protein 1 Racgap1  
1421547\_at 0.97122 CD180 antigen Cd180  
1421548\_at 0.97844 protocadherin beta 2 Pcdhb2  
1421549\_at 1.02584 protocadherin beta 15 Pcdhb15  
1421550\_a\_at 0.80623 tripartite motif protein 34 /// similar to Tripartite motif protein 34 /// similar to Tripartite motif protein 34 Trim34 /// LOC434218 /// LOC640746

1421551\_s\_at 1.33871 interferon activated gene 202B Ifi202b  
1421552\_at 0.94369 caudal type homeo box 4 Cdx4  
1421553\_at 0.99939 "epilepsy, progressive myoclonic epilepsy, type 2 gene alpha" Epm2a  
1421554\_at 1.07450 LIM homeobox transcription factor 1 alpha Lmx1a  
1421555\_at 0.91395 "adrenergic receptor, beta 3" Adrb3  
1421556\_at 0.95405 "serine (or cysteine) peptidase inhibitor, clade A, member 3A" Serpina3a  
1421557\_x\_at 0.98528 thioredoxin 2 Txn2  
1421558\_at 0.91263 brachyury 2 T2  
1421559\_at 1.02803 "ABO blood group (transferase A, alpha 1-3-N-acetylgalactosaminyltransferase, transferase B, alpha 1-3-galactosyltransferase)" Abo  
1421560\_at 0.86946 snail homolog 3 (Drosophila) Snai3  
1421561\_at 1.02137 "basic helix-loop-helix domain containing, class B4" Bhlhb4  
1421562\_at 0.98093 CD209c antigen Cd209c  
1421563\_at 0.94470 "ATPase, Cu++ transporting, beta polypeptide" Atp7b  
1421564\_at 1.15721 "serine (or cysteine) peptidase inhibitor, clade A, member 3C" Serpina3c  
1421565\_at 1.08787 roundabout homolog 3 (Drosophila) Robo3  
1421566\_at 0.88339 plasmacytoma expressed transcript 2 Pet2  
1421567\_at 0.93532 neuronal PAS domain protein 3 Npas3  
1421568\_at 1.05815 "potassium voltage-gated channel, shaker-related, subfamily, member 6" Kcna6  
1421569\_at 1.10023 "glutamate receptor, ionotropic, delta 1" Grid1  
1421570\_at 0.89822 interleukin 9 receptor Il9r  
1421571\_a\_at 1.17632 "lymphocyte antigen 6 complex, locus C" Ly6c  
1421572\_at 0.99554 "hypoxia inducible factor 3, alpha subunit" Hif3a  
1421573\_at 1.03075 RIKEN cDNA 4930533N22 gene 4930533N22Rik  
1421574\_at 0.92945 RAS related protein 2a Rap2a  
1421575\_at 1.01192 RIKEN cDNA 2310057N15 gene 2310057N15Rik  
1421576\_at 1.00779 RIKEN cDNA 4930524B15 gene 4930524B15Rik  
1421577\_at 0.85831 even skipped homeotic gene 2 homolog Evx2  
1421578\_at 0.92071 chemokine (C-C motif) ligand 4 Ccl4  
1421579\_at 1.01954 homeo box A9 Hoxa9  
1421580\_at 1.05725 contactin associated protein 1 Cntnap1  
1421581\_at 1.10592 "potassium inwardly-rectifying channel, subfamily J, member 6" Kcnj6  
1421582\_a\_at 0.90124 cAMP responsive element binding protein 1 Creb1  
1421583\_at 1.06861 cAMP responsive element binding protein 1 Creb1  
1421584\_at 0.96899 opsin 4 (melanopsin) Opn4  
1421585\_at 0.96794 RIKEN cDNA 4933439F11 gene 4933439F11Rik  
1421586\_a\_at 0.93257 "CD46 antigen, complement regulatory protein" Cd46  
1421587\_at 1.05012 kallikrein 1-related peptidase b27 Klk1b27  
1421588\_at 0.96824 "tumor necrosis factor (ligand) superfamily, member 14" Tnfsf14  
1421589\_at 0.98118 keratin 31 Krt31  
1421590\_at 0.95952 "MAS-related GPR, member H" Mrgprh  
1421591\_at 0.92132 "cylicin, basic protein of sperm head cytoskeleton 1" Cylc1  
1421592\_at 1.06722 neural cell adhesion molecule 2 Ncam2

1421593\_at 0.96237 neural cell adhesion molecule 2 Ncam2  
1421594\_a\_at 0.70155 synaptotagmin-like 2 Syt12  
1421595\_at 0.93554 RIKEN cDNA 9630031F12 gene 9630031F12Rik  
1421596\_s\_at 0.96403 histocompatibility 28 H28  
1421597\_a\_at 0.86082 "homeo box, msh-like 3" Msx3  
1421598\_at 0.96947 --- ---  
1421599\_at 0.93800 heparan sulfate 6-O-sulfotransferase 3 Hs6st3  
1421600\_a\_at 0.98784 tripartite motif protein 26 Trim26  
1421601\_at 0.95775 genomic screened homeo box 2 Gsh2  
1421602\_at 1.01094 sex hormone binding globulin Shbg  
1421603\_a\_at 1.04215 CEA-related cell adhesion molecule 2 Ceacam2  
1421604\_a\_at 0.90788 Kruppel-like factor 3 (basic) Klf3  
1421605\_a\_at 1.00470 aquaporin 9 Aqp9  
1421606\_a\_at 1.18348 "sulfotransferase family 4A, member 1" Sult4a1  
1421607\_at 0.99798 vestigial like 1 homolog (Drosophila) Vgl1  
1421608\_at 1.20476 interleukin 20 Il20  
1421609\_a\_at 0.94407 camello-like 3 Cml3  
1421610\_at 1.03928 chemokine (C-X3-C motif) ligand 1 Cx3cl1  
1421611\_at 0.89206 "hypothetical protein, MNCb-2457" AB041806  
1421612\_a\_at 1.07465 "H2A histone family, member Y3 /// H2A histone family, member Y2"  
H2afy3 /// H2afy2  
1421613\_at 1.06673 "H2A histone family, member Y3" H2afy3  
1421614\_at 0.86951 zonadhesin Zan  
1421615\_at 1.12543 myosin XV Myo15  
1421616\_at 1.05471 "glutamate receptor, ionotropic, NMDA2A (epsilon 1)" Grin2a  
1421617\_at 1.13247 "transient receptor potential cation channel, subfamily M, member 8" Trpm8  
1421618\_at 0.91156 myosin IF Myo1f  
1421619\_at 0.93308 "potassium voltage-gated channel, subfamily H (eag-related), member 3" Kcnh3  
1421620\_at 1.02197 "interleukin 5 receptor, alpha" Il5ra  
1421621\_at 0.82207 RAS protein-specific guanine nucleotide-releasing factor 2 Rasgrf2  
1421622\_a\_at 0.97439 Rap guanine nucleotide exchange factor (GEF) 4 Rapgef4  
1421623\_at 1.10999 "interleukin 12 receptor, beta 2" Il12rb2  
1421624\_a\_at 1.05420 enabled homolog (Drosophila) Enah  
1421625\_a\_at 0.96000 transmembrane channel-like gene family 1 Tmc1  
1421626\_at 0.88357 transmembrane channel-like gene family 1 Tmc1  
1421627\_at 0.94192 even skipped homeotic gene 1 homolog Evx1  
1421628\_at 1.01347 interleukin 18 receptor 1 Il18r1  
1421629\_at 0.92921 "gamma-aminobutyric acid (GABA-A) receptor, subunit epsilon" Gabre  
1421630\_at 1.00255 "zinc finger protein 1, Y linked /// zinc finger protein 2, Y linked" Zfy1 /// Zfy2  
1421631\_at 0.97959 protocadherin beta 1 Pcdhb1  
1421632\_at 0.87911 "potassium intermediate/small conductance calcium-activated channel,  
subfamily N, member 3" Kcnn3  
1421633\_a\_at 0.96046 hyaluronan and proteoglycan link protein 1 Hapln1

1421634\_at 1.00209 calpain 8 Capn8  
1421635\_at 0.83850 cyclin M4 Cnnm4  
1421636\_at 0.97058 RIKEN cDNA 9030605E16 gene 9030605E16Rik  
1421637\_at 0.95172 "solute carrier family 5, member 4a" Slc5a4a  
1421638\_at 1.01787 pregnancy specific glycoprotein 17 Psg17  
1421639\_at 0.93634 RIKEN cDNA 1700082M22 gene 1700082M22Rik  
1421640\_a\_at 1.03486 TRAF family member-associated Nf-kappa B activator Tank  
1421641\_at 0.88386 "solute carrier family 6 (neurotransmitter transporter, noradrenalin), member 2" Slc6a2  
1421642\_a\_at 1.07208 cysteinyl leukotriene receptor 2 Cysltr2  
1421643\_at 0.98372 "zinc finger protein, subfamily 1A, 2 (Helios)" Zfpn1a2  
1421644\_at 1.09518 schlafen 3 Slfn3  
1421645\_at 1.02963 RIKEN cDNA 9930013L23 gene 9930013L23Rik  
1421646\_a\_at 0.88531 protein inhibitor of activated STAT 3 Pias3  
1421647\_at 0.98512 CD1d2 antigen Cd1d2  
1421648\_at 1.01143 neuroligin 1 Nlgn1  
1421649\_at 0.93587 "tumor necrosis factor receptor superfamily, member 8" Tnfrsf8  
1421650\_at 0.96901 matrix extracellular phosphoglycoprotein with ASARM motif (bone) Mepe  
1421651\_at 1.07557 ankyrin repeat domain 22 Ankrd22  
1421652\_at 1.00458 5-hydroxytryptamine (serotonin) receptor 3B Htr3b  
1421653\_a\_at 0.96986 immunoglobulin heavy chain (J558 family) /// similar to immunoglobulin heavy chain variable region /// similar to immunoglobulin mu-chain /// similar to anti-poly(dC) monoclonal antibody heavy chain /// similar to Ig heavy chain V region 23 precursor /// similar to Ig heavy chain V region 102 precursor /// similar to Ig heavy chain V region VH558 A1/A4 precursor Igh-VJ558 /// LOC238447 /// LOC544903 /// LOC544907 /// LOC633774 /// LOC676478 /// LOC677563  
1421654\_a\_at 1.00245 lamin A Lmna  
1421655\_a\_at 0.92023 chemokine (C-C motif) receptor 4 Ccr4  
1421656\_at 0.98460 sprouty homolog 2 (Drosophila) Spry2  
1421657\_a\_at 0.90766 SRY-box containing gene 17 Sox17  
1421658\_x\_at 0.99818 pregnancy specific glycoprotein 18 Psg18  
1421659\_at 0.92976 "adrenergic receptor, alpha 1a" Adra1a  
1421660\_at 0.99390 "sodium channel, voltage-gated, type IX, alpha /// similar to sodium channel 25" Scn9a /// LOC671835  
1421661\_at 1.02473 formyl peptide receptor-like 1 Fprl1  
1421662\_a\_at 0.91403 tumor suppressor candidate 3 Tusc3  
1421663\_at 1.00475 dehydrogenase/reductase member 2 Dhrs2  
1421664\_a\_at 1.10419 phosphoserine/threonine/tyrosine interaction protein Styx  
1421665\_a\_at 1.01437 gonadotropin releasing hormone receptor Gnhr  
1421666\_a\_at 0.94616 arylalkylamine N-acetyltransferase Aanat  
1421667\_at 0.82737 neuromedin U receptor 1 Nmur1  
1421668\_x\_at 0.99319 spermatogenesis associated glutamate (E)-rich protein 3 Speer3  
1421669\_at 0.97586 "sulfotransferase family 3A, member 1" Sult3a1  
1421670\_a\_at 0.89546 interleukin-1 receptor-associated kinase 4 Irak4

1421671\_at 1.10243 hydroxysteroid (17-beta) dehydrogenase 3 Hsd17b3  
1421672\_at 0.97678 interleukin 17A Il17a  
1421673\_s\_at 0.94741 syntaxin 1B2 /// syntaxin 1B1 Stx1b2 /// Stx1b1  
1421674\_at 1.01144 --- ---  
1421675\_at 0.97277 RIKEN cDNA 1700123K08 gene 1700123K08Rik  
1421676\_at 1.08237 RIKEN cDNA 4930542N07 gene 4930542N07Rik  
1421677\_at 1.06302 fibroblast growth factor 20 Fgf20  
1421678\_at 1.00512 "inositol 1,4,5-triphosphate receptor 2" Itpr2  
1421679\_a\_at 1.13529 cyclin-dependent kinase inhibitor 1A (P21) Cdkn1a  
1421680\_at 1.04455 RIKEN cDNA A030005L19 gene A030005L19Rik  
1421681\_at 0.83868 neuregulin 4 Nrg4  
1421682\_a\_at 1.02663 t-complex-associated testis expressed 3 Tcte3  
1421683\_at 1.08288 t-complex-associated testis expressed 3 Tcte3  
1421684\_at 1.01418 RIKEN cDNA 2310051M13 gene 2310051M13Rik  
1421685\_at 1.00403 "C-type lectin domain family 4, member b1" Clec4b1  
1421686\_at 0.93030 RFamide-related peptide Rfrp  
1421687\_at 1.12162 beta-microseminoprotein Msmb  
1421688\_a\_at 0.95225 chemokine (C-C motif) ligand 1 Ccl1  
1421689\_at 0.95626 keratin associated protein 8-2 Krtap8-2  
1421690\_s\_at 1.02172 agouti related protein Agrp  
1421691\_at 0.93669 keratin associated protein 16-7 Krtap16-7  
1421692\_at 1.14777 "calcium channel, voltage-dependent, R type, alpha 1E subunit" Cacna1e  
1421693\_a\_at 0.99505 G protein-coupled receptor 98 Gpr98  
1421694\_a\_at 0.91884 chondroitin sulfate proteoglycan 2 Cspg2  
1421695\_at 0.83334 stereocilin Strc  
1421696\_at 1.04922 polycystic kidney and hepatic disease 1-like 1 Pkhd11l  
1421697\_at 0.98472 "Usher syndrome 2A (autosomal recessive, mild) homolog (human)" Ush2a  
1421698\_a\_at 0.93224 "procollagen, type XIX, alpha 1" Col19a1  
1421699\_at 1.03527 enamel Enam  
1421700\_at 0.97809 testis expressed gene 16 Tex16  
1421701\_at 0.93941 "vomeronasal 2, receptor, 16" V2r16  
1421702\_at 1.05438 retinol dehydrogenase 1 (all trans) Rdh1  
1421703\_at 0.91203 zinc finger protein 59 Zfp59  
1421704\_a\_at 1.04936 "phosphatidylinositol 3-kinase, C2 domain containing, gamma polypeptide" Pik3c2g  
1421705\_at 0.96537 "sodium channel, voltage-gated, type III, alpha" Scn3a  
1421706\_at 0.92131 matrix metalloproteinase 20 (enamelysin) Mmp20  
1421707\_at 0.88659 transmembrane channel-like gene family 2 Tmc2  
1421708\_a\_at 1.02382 signal transducer and activator of transcription 6 Stat6  
1421709\_a\_at 0.89300 flavin containing monooxygenase 5 Fmo5  
1421710\_at 0.92001 zinc finger protein 92 Zfp92  
1421711\_at 0.94578 zinc finger protein 109 Zfp109  
1421712\_at 1.01038 "selectin, endothelial cell" Sele

|              |         |                                                                              |          |
|--------------|---------|------------------------------------------------------------------------------|----------|
| 1421713_at   | 1.03425 | preferentially expressed antigen in melanoma-like 1                          | Pramell1 |
| 1421714_at   | 0.94636 | "transmembrane protease, serine 3"                                           | Tmprss3  |
| 1421715_at   | 1.02240 | pheromone receptor V2Rx                                                      | V2rx     |
| 1421716_at   | 1.04923 | "vomeronasal 1 receptor, D6"                                                 | V1rd6    |
| 1421717_at   | 1.13943 | "vomeronasal 1 receptor, D4"                                                 | V1rd4    |
| 1421718_at   | 1.24079 | striamin                                                                     | Strm     |
| 1421719_at   | 1.05369 | "vomeronasal 2, receptor, 1b"                                                | V2r1b    |
| 1421720_a_at | 0.99423 | deltex 2 homolog (Drosophila)                                                | Dtx2     |
| 1421721_a_at | 0.90250 | aryl hydrocarbon receptor nuclear translocator                               | Arnt     |
| 1421722_at   | 0.87394 | ---                                                                          | ---      |
| 1421723_at   | 0.97670 | protocadherin beta 18                                                        | Pcdhb18  |
| 1421724_at   | 0.97721 | "vomeronasal 1 receptor, D7"                                                 | V1rd7    |
| 1421725_at   | 0.97054 | "solute carrier family 26, member 5"                                         | Slc26a5  |
| 1421726_at   | 0.94685 | "adaptor-related protein complex AP-4, beta 1"                               | Ap4b1    |
| 1421727_at   | 0.89001 | eyes absent 1 homolog (Drosophila)                                           | Eya1     |
| 1421728_at   | 0.85956 | oligodendrocyte transcription factor 3                                       | Olig3    |
| 1421729_a_at | 1.06102 | "fer (fms/fps related) protein kinase, testis specific 2"                    | Fert2    |
| 1421730_at   | 1.02000 | "nuclear receptor subfamily 5, group A, member 1"                            | Nr5a1    |
| 1421731_a_at | 0.95451 | flap structure specific endonuclease 1                                       | Fen1     |
| 1421732_at   | 1.11618 | glutamine repeat protein 1                                                   | Glrp1    |
| 1421733_a_at | 0.96213 | protein-tyrosine sulfotransferase 1                                          | Tpst1    |
| 1421734_at   | 1.00378 | ---                                                                          | ---      |
| 1421735_a_at | 0.91731 | "ST8 alpha-N-acetyl-neuraminide alpha-2,8-sialyltransferase 5"               | St8sia5  |
| 1421736_at   | 0.87637 | "vomeronasal 1 receptor, D3"                                                 | V1rd3    |
| 1421737_at   | 0.93278 | aristaless 4                                                                 | Alx4     |
| 1421738_at   | 1.01815 | "gamma-aminobutyric acid (GABA-A) receptor, subunit alpha 2"                 | Gabra2   |
| 1421739_a_at | 1.05299 | megakaryocyte-associated tyrosine kinase                                     | Matk     |
| 1421740_at   | 1.04881 | "GNAS (guanine nucleotide binding protein, alpha stimulating) complex locus" | Gnas     |
| 1421741_at   | 0.96535 | "cytochrome P450, family 3, subfamily a, polypeptide 16"                     | Cyp3a16  |
| 1421742_at   | 0.88386 | guanosine diphosphate (GDP) dissociation inhibitor 2                         | Gdi2     |
| 1421743_a_at | 0.91062 | poly(rC) binding protein 2                                                   | Pcbp2    |
| 1421744_at   | 0.90678 | "tumor necrosis factor (ligand) superfamily, member 4"                       | Tnfsf4   |
| 1421745_at   | 0.95312 | pleiomorphic adenoma gene 1                                                  | Plag1    |
| 1421746_a_at | 1.12308 | F-box protein 17                                                             | Fbxo17   |
| 1421747_at   | 0.93877 | estrogen-related receptor gamma                                              | Esrrg    |
| 1421748_a_at | 1.07656 | "tubulin, delta 1"                                                           | Tubd1    |
| 1421749_at   | 0.94186 | ---                                                                          | ---      |
| 1421750_a_at | 1.00697 | von Hippel-Lindau binding protein 1                                          | Vbp1     |
| 1421751_a_at | 1.11809 | "proteasome (prosome, macropain) 26S subunit, non-ATPase, 14"                | Psmd14   |
| 1421752_a_at | 0.94049 | "serine (or cysteine) peptidase inhibitor, clade B, member 5"                | Serpib5  |
| 1421753_a_at | 0.99089 | LIM homeobox protein 3                                                       | Lhx3     |
| 1421754_at   | 0.88327 | cDNA sequence AY036118                                                       | AY036118 |

1421755\_at 0.89308 G protein-coupled receptor 132 Gpr132  
1421756\_a\_at 0.75255 G protein-coupled receptor 19 Gpr19  
1421757\_at 1.03439 5-hydroxytryptamine (serotonin) receptor 6 Htr6  
1421758\_at 1.07675 N-acetyltransferase 1 (arylamine N-acetyltransferase) Nat1  
1421759\_a\_at 0.96213 forkhead box K1 Foxk1  
1421760\_at 1.21206 pre T-cell antigen receptor alpha Ptcra  
1421761\_a\_at 0.96075 BarH-like homeobox 2 Barx2  
1421762\_at 1.06534 "potassium inwardly-rectifying channel, subfamily J, member 5" Kcnj5  
1421763\_at 1.05226 bone morphogenetic protein 10 Bmp10  
1421764\_at 1.08447 "vomeronasal 1 receptor, D9" V1rd9  
1421765\_at 0.95399 paired box gene 5 Pax5  
1421766\_at 1.13378 ubiquitin carboxyl-terminal esterase L4 Uchl4  
1421767\_at 0.95567 Adenosine kinase Adk  
1421768\_a\_at 1.07327 homer homolog 1 (Drosophila) Homer1  
1421769\_at 0.93265 LIM homeobox transcription factor 1 beta Lmx1b  
1421770\_a\_at 0.90418 "T-cell leukemia, homeobox 2" Tlx2  
1421771\_a\_at 0.97189 IAP promoted placental gene Ipp  
1421772\_a\_at 0.93853 cytochrome c oxidase subunit VIIa polypeptide 2-like Cox7a2l  
1421773\_at 1.05329 ets variant gene 2 Etv2  
1421774\_at 0.87412 ventral anterior homeobox containing gene 1 Vax1  
1421775\_at 0.95428 "Fc receptor, IgE, high affinity I, alpha polypeptide" Fcer1a  
1421776\_at 0.96384 olfactory receptor 74 Olfr74  
1421777\_at 1.06026 olfactory receptor 73 Olfr73  
1421778\_at 0.96550 "vomeronasal 1, receptor B2" V1rb2  
1421779\_at 1.00968 Ras-like without CAAX 2 Rit2  
1421780\_a\_at 0.90812 calcium binding protein 5 Cabp5  
1421781\_at 0.82474 uroplakin 2 Upk2  
1421782\_a\_at 1.00257 submaxillary gland androgen regulated protein 2 Smr2  
1421783\_a\_at 1.07748 Kv channel-interacting protein 2 Kcnip2  
1421784\_a\_at 0.82562 ephrin A4 Efna4  
1421785\_at 0.91355 UEV and lactate/malate dehydrogenase domains Uevld  
1421786\_at 1.02378 "protein phosphatase 3, regulatory subunit B, alpha isoform (calcineurin B, type I)" Ppp3r1  
1421787\_at 0.94294 --- ---  
1421788\_x\_at 0.87533 epidermal growth factor binding protein type B Egfbp2  
1421789\_s\_at 1.05192 ADP-ribosylation factor 3 Arf3  
1421790\_a\_at 0.88159 "potassium voltage-gated channel, shaker-related subfamily, beta member 3" Kcnab3  
1421791\_at 1.00556 "angiogenin, ribonuclease A family, member 3" Ang3  
1421792\_s\_at 1.05646 triggering receptor expressed on myeloid cells 2 Trem2  
1421793\_at 0.97252 fibroblast growth factor 11 Fgf11  
1421794\_at 1.09724 "killer cell lectin-like receptor subfamily C, member 3" Klrc3  
1421795\_s\_at 0.95427 "killer cell lectin-like receptor subfamily C, member 2 /// killer cell lectin-like



receptor subfamily C, member 3" Klrc2 /// Klrc3

1421796\_a\_at 0.87462 ephrin A5 Efna5  
 1421797\_a\_at 0.99536 sorting nexin 12 Snx12  
 1421798\_at 1.02026 mesogenin 1 Msgn1  
 1421799\_at 1.02746 urotensin 2 Uts2  
 1421800\_at 1.35281 per-hexamer repeat gene 1 Phxr1  
 1421801\_at 1.04121 --- ---  
 1421802\_at 0.94432 "eosinophil-associated, ribonuclease A family, member 1" Ear1  
 1421803\_at 0.93868 androgen-binding protein eta Apbh  
 1421804\_at 0.93062 "fatty acid binding protein 9, testis" Fabp9  
 1421805\_at 0.97961 --- ---  
 1421806\_at 0.99058 defensin beta 3 Defb3  
 1421807\_at 0.96684 defensin beta 6 Defb6  
 1421808\_at 1.06336 defensin beta 5 Defb5  
 1421809\_at 0.96746 DiGeorge syndrome critical region gene 2 Dgcr2  
 1421810\_at 1.01604 DiGeorge syndrome critical region gene 2 Dgcr2  
 1421811\_at 0.68873 thrombospondin 1 /// similar to thrombospondin 1 Thbs1 /// LOC640441  
 1421812\_at 1.26214 TAP binding protein Tapbp  
 1421813\_a\_at 0.80694 prosaposin Psap  
 1421814\_at 1.03349 moesin Msn  
 1421815\_at 0.77499 ependymin related protein 2 (zebrafish) Epdr2  
 1421816\_at 0.97191 "similar to Glutathione reductase, mitochondrial precursor (GR) (GRase)"  
 LOC630729  
 1421817\_at 0.93235 glutathione reductase 1 Gsr  
 1421818\_at 0.99575 B-cell leukemia/lymphoma 6 Bcl6  
 1421819\_a\_at 1.19659 SET translocation /// similar to SET protein (Phosphatase 2A inhibitor I2PP2A) (I-2PP2A) (Template-activating factor I) (TAF-I) (Liver regeneration-related protein LRRGR00002) Set /// LOC671392  
 1421820\_a\_at 0.93107 neurofibromatosis 2 Nf2  
 1421821\_at 1.45311 low density lipoprotein receptor Ldlr  
 1421822\_at 0.97204 "protein phosphatase 2 (formerly 2A), catalytic subunit, beta isoform" Ppp2cb  
 1421823\_a\_at 0.97664 "protein phosphatase 2 (formerly 2A), catalytic subunit, beta isoform" Ppp2cb  
 1421824\_at 1.04091 beta-site APP cleaving enzyme 1 Bace1  
 1421825\_at 0.92734 beta-site APP cleaving enzyme 1 Bace1  
 1421826\_at 1.00036 delta-like 4 (Drosophila) Dll4  
 1421827\_at 0.76524 delta-like 4 (Drosophila) Dll4  
 1421828\_at 1.08412 karyopherin (importin) alpha 3 Kpna3  
 1421829\_at 1.11696 adenylate kinase 3 alpha-like 1 Ak311  
 1421830\_at 1.48040 adenylate kinase 3 alpha-like 1 Ak311  
 1421831\_at 1.07299 --- ---  
 1421832\_at 0.79265 twisted gastrulation homolog 1 (Drosophila) Twsg1  
 1421833\_at 0.93886 "phosphatidylinositol-4-phosphate 5-kinase, type 1 alpha" Pip5k1a  
 1421834\_at 0.96266 "phosphatidylinositol-4-phosphate 5-kinase, type 1 alpha" Pip5k1a

|              |         |                                                                   |         |
|--------------|---------|-------------------------------------------------------------------|---------|
| 1421835_at   | 0.97077 | microtubule-associated protein 7                                  | Mtap7   |
| 1421836_at   | 0.95588 | ---                                                               | ---     |
| 1421837_at   | 1.07022 | ribosomal protein S18                                             | Rps18   |
| 1421838_at   | 1.09357 | ribosomal protein S18                                             | Rps18   |
| 1421839_at   | 0.52932 | "ATP-binding cassette, sub-family A (ABC1), member 1"             | Abca1   |
| 1421840_at   | 0.25567 | "ATP-binding cassette, sub-family A (ABC1), member 1"             | Abca1   |
| 1421841_at   | 0.73813 | fibroblast growth factor receptor 3                               | Fgfr3   |
| 1421842_a_at | 0.89342 | secretory carrier membrane protein 4                              | Scamp4  |
| 1421843_at   | 0.89242 | interleukin 1 receptor accessory protein                          | Il1rap  |
| 1421844_at   | 1.23110 | ---                                                               | ---     |
| 1421845_at   | 0.89332 | golgi phosphoprotein 3                                            | Golph3  |
| 1421846_at   | 1.00945 | WD repeat and SOCS box-containing 2                               | Wsb2    |
| 1421847_at   | 0.98409 | WD repeat and SOCS box-containing 2                               | Wsb2    |
| 1421848_at   | 0.97408 | "solute carrier family 22 (organic cation transporter), member 5" | Slc22a5 |
| 1421849_at   | 0.91267 | stromal antigen 2                                                 | Stag2   |
| 1421850_at   | 1.08473 | microtubule-associated protein 1 B                                | Mtap1b  |
| 1421851_at   | 1.11920 | microtubule-associated protein 1 B                                | Mtap1b  |
| 1421852_at   | 1.02349 | "potassium channel, subfamily K, member 5"                        | Kcnk5   |
| 1421853_at   | 0.94879 | presenilin 1                                                      | Psen1   |
| 1421854_at   | 1.05270 | fibrinogen-like protein 2                                         | Fgl2    |
| 1421855_at   | 1.00599 | fibrinogen-like protein 2                                         | Fgl2    |
| 1421856_at   | 1.35877 | S100 calcium binding protein A3                                   | S100a3  |
| 1421857_at   | 0.94745 | a disintegrin and metallopeptidase domain 17                      | Adam17  |
| 1421858_at   | 0.98915 | a disintegrin and metallopeptidase domain 17                      | Adam17  |
| 1421859_at   | 1.03727 | a disintegrin and metallopeptidase domain 17                      | Adam17  |
| 1421860_at   | 0.96010 | calsyntenin 1                                                     | Clstn1  |
| 1421861_at   | 0.94977 | calsyntenin 1                                                     | Clstn1  |
| 1421862_a_at | 1.01704 | vesicle-associated membrane protein 1                             | Vamp1   |
| 1421863_at   | 0.84691 | vesicle-associated membrane protein 1                             | Vamp1   |
| 1421864_at   | 1.00306 | diazepam binding inhibitor-like 5                                 | Dbil5   |
| 1421865_at   | 0.97893 | diazepam binding inhibitor-like 5                                 | Dbil5   |
| 1421866_at   | 0.89714 | "nuclear receptor subfamily 3, group C, member 1"                 | Nr3c1   |
| 1421867_at   | 1.04664 | "nuclear receptor subfamily 3, group C, member 1"                 | Nr3c1   |
| 1421868_a_at | 0.94537 | pancreatic lipase                                                 | Pnlip   |
| 1421869_at   | 1.12215 | tripartite motif-containing 44                                    | Trim44  |
| 1421870_at   | 0.97716 | tripartite motif-containing 44                                    | Trim44  |
| 1421871_at   | 0.79209 | SH3-binding domain glutamic acid-rich protein like                | Sh3bgrl |
| 1421872_at   | 1.15240 | "RAB24, member RAS oncogene family"                               | Rab24   |
| 1421873_s_at | 1.13757 | "RAB24, member RAS oncogene family"                               | Rab24   |
| 1421874_a_at | 1.00700 | mitochondrial ribosomal protein S23                               | Mrps23  |
| 1421875_a_at | 0.98037 | mitochondrial ribosomal protein S23                               | Mrps23  |
| 1421876_at   | 0.95597 | mitogen activated protein kinase 9                                | Mapk9   |
| 1421877_at   | 0.86462 | mitogen activated protein kinase 9                                | Mapk9   |

1421878\_at 0.91576 mitogen activated protein kinase 9 Mapk9  
1421879\_at 0.95574 myotubularin related protein 1 Mtmr1  
1421880\_at 0.87773 myotubularin related protein 1 Mtmr1  
1421881\_a\_at 0.95054 "ELAV (embryonic lethal, abnormal vision, Drosophila)-like 2 (Hu antigen B)" Elavl2  
1421882\_a\_at 1.02149 "ELAV (embryonic lethal, abnormal vision, Drosophila)-like 2 (Hu antigen B)" Elavl2  
1421883\_at 1.03097 "ELAV (embryonic lethal, abnormal vision, Drosophila)-like 2 (Hu antigen B)" Elavl2  
1421884\_at 1.02719 Son of sevenless homolog 1 (Drosophila) Sos1  
1421885\_at 1.02397 Son of sevenless homolog 1 (Drosophila) Sos1  
1421886\_at 1.13381 Son of sevenless homolog 1 (Drosophila) Sos1  
1421887\_a\_at 0.90928 amyloid beta (A4) precursor-like protein 2 Aplp2  
1421888\_x\_at 0.94037 amyloid beta (A4) precursor-like protein 2 Aplp2  
1421889\_a\_at 0.86890 amyloid beta (A4) precursor-like protein 2 Aplp2  
1421890\_at 0.82770 "ST3 beta-galactoside alpha-2,3-sialyltransferase 2" St3gal2  
1421891\_at 0.82819 "ST3 beta-galactoside alpha-2,3-sialyltransferase 2" St3gal2  
1421892\_at 0.87857 --- ---  
1421893\_a\_at 1.04670 tripeptidyl peptidase II Tpp2  
1421894\_a\_at 1.09390 tripeptidyl peptidase II Tpp2  
1421895\_at 1.12130 "eukaryotic translation initiation factor 2, subunit 3, structural gene X-linked /// similar to eukaryotic translation initiation factor 2, subunit 3, structural gene X-linked" Eif2s3x /// LOC673373  
1421896\_at 0.98618 "ELK1, member of ETS oncogene family" Elk1  
1421897\_at 1.00888 "ELK1, member of ETS oncogene family" Elk1  
1421898\_a\_at 0.91217 "major histocompatibility complex, class I-related" Mr1  
1421899\_a\_at 0.92830 "major histocompatibility complex, class I-related" Mr1  
1421900\_at 0.98909 eukaryotic translation initiation factor 2 alpha kinase 1 Eif2ak1  
1421901\_at 0.93396 eukaryotic translation initiation factor 2 alpha kinase 1 Eif2ak1  
1421902\_at 0.98656 intersex-like (Drosophila) Ixl  
1421903\_at 0.98110 intersex-like (Drosophila) Ixl  
1421904\_at 1.00090 nuclear receptor coactivator 6 interacting protein Ncoa6ip  
1421905\_at 1.02551 nuclear receptor coactivator 6 interacting protein Ncoa6ip  
1421906\_at 1.11024 peroxisome proliferator activated receptor binding protein Pparbp  
1421907\_at 1.11821 peroxisome proliferator activated receptor binding protein Pparbp  
1421908\_a\_at 0.90963 transcription factor 12 Tcf12  
1421909\_at 0.97990 transcription factor 20 Tcf20  
1421910\_at 1.09777 transcription factor 20 Tcf20  
1421911\_at 0.96549 signal transducer and activator of transcription 2 Stat2  
1421912\_at 1.01021 "solute carrier family 23 (nucleobase transporters), member 1" Slc23a1  
1421913\_at 1.08589 mitochondrial ribosomal protein L19 Mrpl19  
1421914\_s\_at 1.07264 mitochondrial ribosomal protein L19 Mrpl19  
1421915\_a\_at 0.61199 "ST3 beta-galactoside alpha-2,3-sialyltransferase 3" St3gal3

|              |         |                                                                                                         |                                   |
|--------------|---------|---------------------------------------------------------------------------------------------------------|-----------------------------------|
| 1421916_at   | 0.91248 | "platelet derived growth factor receptor, alpha polypeptide"                                            | Pdgfra                            |
| 1421917_at   | 1.00173 | "platelet derived growth factor receptor, alpha polypeptide"                                            | Pdgfra                            |
| 1421918_at   | 0.95759 | "acidic (leucine-rich) nuclear phosphoprotein 32 family, member A"                                      | Anp32a                            |
| 1421919_a_at | 0.97475 | chemokine (C-C motif) receptor 9                                                                        | Ccr9                              |
| 1421920_a_at | 0.91692 | chemokine (C-C motif) receptor 9                                                                        | Ccr9                              |
| 1421921_at   | 0.94712 | "serine (or cysteine) peptidase inhibitor, clade A, member 3M"                                          | Serpina3m                         |
| 1421922_at   | 1.24248 | SH3-domain binding protein 5 (BTK-associated)                                                           | Sh3bp5                            |
| 1421923_at   | 1.32441 | SH3-domain binding protein 5 (BTK-associated)                                                           | Sh3bp5                            |
| 1421924_at   | 0.96427 | "solute carrier family 2 (facilitated glucose transporter), member 3"                                   | Slc2a3                            |
| 1421925_at   | 1.05119 | mitogen-activated protein kinase 11                                                                     | Mapk11                            |
| 1421926_at   | 1.40835 | mitogen-activated protein kinase 11                                                                     | Mapk11                            |
| 1421927_at   | 1.14119 | transducin (beta)-like 2                                                                                | Tbl2                              |
| 1421928_at   | 1.04876 | Eph receptor A4                                                                                         | Epha4                             |
| 1421929_at   | 1.13585 | Eph receptor A4                                                                                         | Epha4                             |
| 1421930_at   | 0.99818 | inducible T-cell co-stimulator                                                                          | Icos                              |
| 1421931_at   | 0.91253 | inducible T-cell co-stimulator                                                                          | Icos                              |
| 1421932_at   | 1.03713 | chromobox homolog 5 (Drosophila HP1a)                                                                   | Cbx5                              |
| 1421933_at   | 0.93702 | chromobox homolog 5 (Drosophila HP1a)                                                                   | Cbx5                              |
| 1421934_at   | 1.01995 | chromobox homolog 5 (Drosophila HP1a)                                                                   | Cbx5                              |
| 1421935_at   | 1.05989 | ribosomal protein S20 /// similar to 40S ribosomal protein S20 /// similar to 40S ribosomal protein S20 | Rps20 /// LOC245676 /// LOC623568 |
| 1421936_at   | 1.11981 | dual adaptor for phosphotyrosine and 3-phosphoinositides 1                                              | Dapp1                             |
| 1421937_at   | 1.09205 | dual adaptor for phosphotyrosine and 3-phosphoinositides 1                                              | Dapp1                             |
| 1421938_at   | 0.84200 | serine hydrolase-like                                                                                   | Serhl                             |
| 1421939_a_at | 0.95013 | stromal antigen 1                                                                                       | Stag1                             |
| 1421940_at   | 1.02215 | stromal antigen 1                                                                                       | Stag1                             |
| 1421941_at   | 0.95327 | calcium/calmodulin-dependent protein kinase IV                                                          | Camk4                             |
| 1421942_s_at | 0.99772 | transforming growth factor alpha                                                                        | Tgfa                              |
| 1421943_at   | 1.18026 | transforming growth factor alpha                                                                        | Tgfa                              |
| 1421944_a_at | 1.01243 | asialoglycoprotein receptor 1                                                                           | Asgr1                             |
| 1421945_a_at | 1.16080 | brix domain containing 1                                                                                | Bxdc1                             |
| 1421946_at   | 0.98720 | "C-reactive protein, pentraxin-related"                                                                 | Crp                               |
| 1421947_at   | 1.12967 | "guanine nucleotide binding protein (G protein), gamma 12"                                              | Gng12                             |
| 1421948_a_at | 0.97381 | RIKEN cDNA 2610507L03 gene                                                                              | 2610507L03Rik                     |
| 1421949_a_at | 1.02394 | RIKEN cDNA 2610507L03 gene                                                                              | 2610507L03Rik                     |
| 1421950_at   | 1.10836 | prefoldin 2                                                                                             | Pfdn2                             |
| 1421951_at   | 0.71705 | LIM homeobox protein 1                                                                                  | Lhx1                              |
| 1421952_at   | 1.17356 | calpain 6                                                                                               | Capn6                             |
| 1421953_at   | 0.92603 | v-crk sarcoma virus CT10 oncogene homolog (avian)-like                                                  | Crkl                              |
| 1421954_at   | 0.91127 | v-crk sarcoma virus CT10 oncogene homolog (avian)-like                                                  | Crkl                              |
| 1421955_a_at | 0.90040 | "neural precursor cell expressed, developmentally down-regulated gene 4"                                | Nedd4                             |
| 1421956_at   | 1.11437 | recombining binding protein suppressor of hairless-like (Drosophila)                                    | Rbpsuhl                           |

1421957\_a\_at 1.03966 "phosphate cytidyltransferase 1, choline, alpha isoform" Pcyt1a  
1421958\_at 0.95177 L1 cell adhesion molecule L1cam  
1421959\_s\_at 0.96574 adenylate cyclase 3 Adcy3  
1421960\_at 0.93843 adenylate cyclase 3 Adcy3  
1421961\_a\_at 0.98662 "DnaJ (Hsp40) homolog, subfamily B, member 5" Dnajb5  
1421962\_at 0.92277 "DnaJ (Hsp40) homolog, subfamily B, member 5" Dnajb5  
1421963\_a\_at 1.06251 cell division cycle 25 homolog B (S. cerevisiae) Cdc25b  
1421964\_at 0.69701 Notch gene homolog 3 (Drosophila) Notch3  
1421965\_s\_at 0.56422 Notch gene homolog 3 (Drosophila) Notch3  
1421966\_at 0.87309 neural cell adhesion molecule 1 Ncam1  
1421967\_at 1.09085 "UDP-Gal:betaGlcNAc beta 1,4-galactosyltransferase, polypeptide 5"  
B4galt5  
1421968\_a\_at 0.96658 non imprinted in Prader-Willi/Angelman syndrome 2 homolog (human)  
Nipa2  
1421969\_a\_at 0.88994 fatty acid amide hydrolase Faah  
1421970\_a\_at 0.89454 "glutamate receptor, ionotropic, AMPA2 (alpha 2)" Gria2  
1421971\_a\_at 1.12335 mitochondrial ribosomal protein S34 Mrps34  
1421972\_s\_at 1.01170 host cell factor C1 Hcfc1  
1421973\_at 0.91864 glial cell line derived neurotrophic factor family receptor alpha 1 Gfra1  
1421974\_at 0.98083 leucine rich repeat containing 50 Lrrc50  
1421975\_a\_at 1.08992 adducin 2 (beta) Add2  
1421976\_at 0.89409 matrix metalloproteinase 19 Mmp19  
1421977\_at 1.04228 matrix metalloproteinase 19 Mmp19  
1421978\_at 0.99840 glutamic acid decarboxylase 2 Gad2  
1421979\_at 0.89391 "phosphate regulating gene with homologies to endopeptidases on the X  
chromosome (hypophosphatemia, vitamin D resistant rickets)" Phex  
1421980\_at 1.04893 "potassium voltage gated channel, Shaw-related subfamily, member 3" Kcnc3  
1421981\_at 0.93527 "potassium voltage gated channel, Shaw-related subfamily, member 3" Kcnc3  
1421982\_a\_at 1.04950 unc-50 homolog (C. elegans) Unc50  
1421983\_s\_at 0.96391 "hepatic nuclear factor 4, alpha" Hnf4a  
1421984\_at 1.06618 stanniocalcin 1 Stc1  
1421985\_a\_at 1.10347 eukaryotic translation initiation factor 4E member 2 Eif4e2  
1421986\_at 1.02839 eukaryotic translation initiation factor 4E member 2 Eif4e2  
1421987\_at 0.98691 3'-phosphoadenosine 5'-phosphosulfate synthase 2 Papss2  
1421988\_at 1.00895 3'-phosphoadenosine 5'-phosphosulfate synthase 2 Papss2  
1421989\_s\_at 1.00173 3'-phosphoadenosine 5'-phosphosulfate synthase 2 Papss2  
1421990\_at 1.01130 synaptotagmin I Syt1  
1421991\_a\_at 0.90082 insulin-like growth factor binding protein 4 Igfbp4  
1421992\_a\_at 0.67232 insulin-like growth factor binding protein 4 Igfbp4  
1421993\_a\_at 1.10783 transmembrane protein 134 Tmem134  
1421994\_a\_at 0.95342 HCLS1 binding protein 3 Hs1bp3  
1421995\_at 1.01484 "transcription factor AP-2, alpha" Tcfap2a  
1421996\_at 1.02100 "transcription factor AP-2, alpha" Tcfap2a

1421997\_s\_at 1.02701 integrin alpha 3 Itga3  
1421998\_at 1.36372 "torsin family 3, member A" Tor3a  
1421999\_at 0.92251 thyroid stimulating hormone receptor Tshr  
1422000\_at 0.88625 "aldo-keto reductase family 1, member C12" Akr1c12  
1422001\_at 0.97826 inhibin beta-C Inhbc  
1422002\_at 0.89731 MAX dimerization protein 1 Mxd1  
1422003\_at 0.95025 Burkitt lymphoma receptor 1 Blr1  
1422004\_at 0.96135 RIKEN cDNA D730048I06 gene D730048I06Rik  
1422005\_at 1.13052 eukaryotic translation initiation factor 2-alpha kinase 2 Eif2ak2  
1422006\_at 1.19911 eukaryotic translation initiation factor 2-alpha kinase 2 Eif2ak2  
1422007\_at 1.11478 aquaporin 3 Aqp3  
1422008\_a\_at 1.07332 aquaporin 3 Aqp3  
1422009\_at 0.86687 "ATPase, Na+/K+ transporting, beta 2 polypeptide" Atp1b2  
1422010\_at 0.89966 toll-like receptor 7 Tlr7  
1422011\_s\_at 1.03985 X-linked lymphocyte-regulated complex /// RIKEN cDNA 3830403N18 gene Xlr /// 3830403N18Rik  
1422012\_at 1.04612 corticotropin releasing hormone receptor 2 Crhr2  
1422013\_at 1.22288 "C-type lectin domain family 4, member a2" Clec4a2  
1422014\_at 0.76901 forkhead box P2 Foxp2  
1422015\_a\_at 0.96413 "ATP-binding cassette, sub-family B (MDR/TAP), member 8" Abcb8  
1422016\_a\_at 0.97228 centromere protein H Cenph  
1422017\_s\_at 0.88913 RIKEN cDNA 4833439L19 gene 4833439L19Rik  
1422018\_at 0.80733 human immunodeficiency virus type I enhancer binding protein 2 Hivep2  
1422019\_at 0.96254 "transforming growth factor, beta receptor II" Tgfbr2  
1422020\_at 0.91069 sprouty homolog 4 (Drosophila) Spry4  
1422021\_at 0.92081 sprouty homolog 4 (Drosophila) Spry4  
1422022\_at 0.82289 zinc finger protein 319 Zfp319  
1422023\_at 1.00162 bassoon Bsn  
1422024\_at 1.04102 Friend leukemia integration 1 Fli1  
1422025\_at 0.99488 microphthalmia-associated transcription factor Mitf  
1422026\_at 0.93608 peptidase inhibitor 16 Pi16  
1422027\_a\_at 1.03981 "E26 avian leukemia oncogene 1, 5' domain" Ets1  
1422028\_a\_at 1.20961 "E26 avian leukemia oncogene 1, 5' domain" Ets1  
1422029\_at 2.23945 chemokine (C-C motif) ligand 20 Ccl20  
1422030\_at 1.03947 "ATPase, H+ transporting, lysosomal V0 subunit A4" Atp6v0a4  
1422031\_a\_at 0.89570 "zinc finger, AN1-type domain 6" Zfand6  
1422032\_a\_at 0.94531 "zinc finger, AN1-type domain 6" Zfand6  
1422033\_a\_at 1.15115 ciliary neurotrophic factor /// zinc finger protein 91 Cntf /// Zfp91  
1422034\_a\_at 0.85147 paralemmin Palm  
1422035\_at 1.05334 "serine (or cysteine) peptidase inhibitor, clade B, member 9c" Serpinb9c  
1422036\_at 0.99051 "striatin, calmodulin binding protein" Strn  
1422037\_at 1.07345 distal-less homeobox 3 Dlx3  
1422038\_a\_at 1.09677 "tumor necrosis factor receptor superfamily, member 22" Tnfrsf22

1422039\_at 0.97789 "tumor necrosis factor receptor superfamily, member 22" Tnfrsf22  
1422040\_at 0.88159 "sema domain, immunoglobulin domain (Ig), and GPI membrane anchor, (semaphorin) 7A" Sema7a  
1422041\_at 1.01227 paired immunoglobulin-like type 2 receptor beta 1 Pilrb1  
1422042\_at 1.10444 gap junction membrane channel protein epsilon 1 Gje1  
1422043\_at 1.09640 tuberous sclerosis 1 Tsc1  
1422044\_at 0.86751 N-deacetylase/N-sulfotransferase (heparan glucosaminyl) 1 Ndst1  
1422045\_a\_at 1.04787 "protein tyrosine phosphatase, non-receptor type 12" Ptpn12  
1422046\_at 1.02543 integrin alpha M Itgam  
1422047\_at 0.98717 cadherin 5 Cdh5  
1422048\_at 1.12505 "transient receptor potential cation channel, subfamily C, member 5" Trpc5  
1422049\_at 1.00591 "NK1 transcription factor related, locus 2 (Drosophila)" Nkx1-2  
1422050\_at 1.05658 "NK1 transcription factor related, locus 2 (Drosophila)" Nkx1-2  
1422051\_a\_at 1.21578 "gamma-aminobutyric acid (GABA-B) receptor, 1" Gabbr1  
1422052\_at 0.91100 cadherin 8 Cdh8  
1422053\_at 0.79646 inhibin beta-A Inhba  
1422054\_a\_at 0.89291 SKI-like Skil  
1422055\_at 1.21504 midline 1 Mid1  
1422056\_at 0.90351 netrin 2-like (chicken) Ntn2l  
1422057\_at 1.05905 nodal Nodal  
1422058\_at 0.99336 --- ---  
1422059\_at 1.02390 chromobox homolog 2 (Drosophila Pc class) Cbx2  
1422060\_at 0.95694 "parvin, beta /// similar to parvin, beta" Parvb /// LOC676024  
1422061\_at 0.91806 "aldo-keto reductase family 1, member C20" Akr1c20  
1422062\_at 1.04022 macrophage scavenger receptor 1 Msr1  
1422063\_a\_at 0.81969 peroxisome biogenesis factor 5 Pex5  
1422064\_a\_at 0.88096 zinc finger and BTB domain containing 20 Zbtb20  
1422065\_at 1.01746 killer cell lectin-like receptor subfamily B member 1D Klrbl1d  
1422066\_x\_at 0.95770 killer cell lectin-like receptor subfamily B member 1D Klrbl1d  
1422067\_at 0.96673 killer cell lectin-like receptor subfamily B member 1D Klrbl1d  
1422068\_at 1.06767 "POU domain, class 3, transcription factor 1" Pou3f1  
1422069\_at 1.10179 melanocortin 1 receptor Mc1r  
1422070\_at 0.98141 "alcohol dehydrogenase 4 (class II), pi polypeptide" Adh4  
1422071\_at 0.94488 "lectin, galactose binding, soluble 6" Lgals6  
1422072\_a\_at 0.89593 "glutathione S-transferase, mu 6" Gstm6  
1422073\_a\_at 0.73748 cadherin EGF LAG seven-pass G-type receptor 2 Celsr2  
1422074\_at 0.99555 caudal type homeo box 2 Cdx2  
1422075\_at 0.87008 caudal type homeo box 2 Cdx2  
1422076\_at 0.95803 acyl-CoA thioesterase 4 Acot4  
1422077\_at 1.09610 acyl-CoA thioesterase 4 Acot4  
1422078\_at 0.79681 thymoma viral proto-oncogene 3 Akt3  
1422079\_at 0.85508 "protein kinase C, eta" Prkch  
1422080\_at 1.06633 interleukin 7 Il7

1422081\_at 1.02213 kyphoscoliosis peptidase Ky  
1422082\_a\_at 1.00349 nuclear transcription factor-Y alpha Nfya  
1422083\_at 0.96456 toll-like receptor 9 Tlr9  
1422084\_at 0.93548 BMX non-receptor tyrosine kinase Bmx  
1422085\_at 0.87330 T-box 19 Tbx19  
1422086\_at 0.83875 T-box 19 Tbx19  
1422087\_at 0.87374 "v-myc myelocytomatosis viral oncogene homolog 1, lung carcinoma derived (avian)" Mycl1  
1422088\_at 0.98742 "v-myc myelocytomatosis viral oncogene homolog 1, lung carcinoma derived (avian)" Mycl1  
1422089\_at 0.96700 natural cytotoxicity triggering receptor 1 Ncr1  
1422090\_a\_at 0.84604 "6-phosphofructo-2-kinase/fructose-2,6-biphosphatase 2" Pfkfb2  
1422091\_at 0.97818 "6-phosphofructo-2-kinase/fructose-2,6-biphosphatase 2" Pfkfb2  
1422092\_at 0.92946 "6-phosphofructo-2-kinase/fructose-2,6-biphosphatase 2" Pfkfb2  
1422093\_at 1.07032 wingless-related MMTV integration site 3A Wnt3a  
1422094\_a\_at 1.39290 zinc finger protein 329 Zfp329  
1422095\_a\_at 1.05887 thymidylate kinase family LPS-inducible member Tyki  
1422096\_at 0.92275 RIKEN cDNA 4933434I20 gene 4933434I20Rik  
1422097\_at 0.87734 RIKEN cDNA 4933434I20 gene 4933434I20Rik  
1422098\_at 1.04609 "activin A receptor, type 1B" Acvr1b  
1422099\_a\_at 1.11354 opioid receptor-like 1 Oprl1  
1422100\_at 1.00702 "cytochrome P450, family 7, subfamily a, polypeptide 1" Cyp7a1  
1422101\_at 1.14531 "tumor necrosis factor receptor superfamily, member 23" Tnfrsf23  
1422102\_a\_at 0.88462 signal transducer and activator of transcription 5B Stat5b  
1422103\_a\_at 0.93987 signal transducer and activator of transcription 5B Stat5b  
1422104\_at 0.98624 visual system homeobox 1 homolog (zebrafish) Vsx1  
1422105\_at 1.04289 "CD3 antigen, epsilon polypeptide" Cd3e  
1422106\_a\_at 0.98247 splA/ryanodine receptor domain and SOCS box containing 2 Spsb2  
1422107\_at 0.87245 RIKEN cDNA 2410066E13 gene 2410066E13Rik  
1422108\_at 0.92553 "protein phosphatase 1, regulatory (inhibitor) subunit 3A" Ppp1r3a  
1422109\_at 1.01811 "regulatory factor X, 1 (influences HLA class II expression)" Rfx1  
1422110\_at 0.92048 hairless Hr  
1422111\_at 0.98744 chemokine binding protein 2 Ccbp2  
1422112\_at 1.00152 chemokine binding protein 2 Ccbp2  
1422113\_at 0.89888 "solute carrier family 5 (sodium iodide symporter), member 5" Slc5a5  
1422114\_at 1.02776 Ets2 repressor factor Erf  
1422115\_a\_at 1.05427 FMS-like tyrosine kinase 3 ligand Flt3l  
1422116\_at 0.94639 "AF4/FMR2 family, member 2" Aff2  
1422117\_s\_at 0.98996 "KH domain containing, RNA binding, signal transduction associated 2" Khdrbs2  
1422118\_at 1.03246 syncoilin Sync  
1422119\_at 1.10249 "RAB5B, member RAS oncogene family" Rab5b  
1422120\_at 1.00250 ELL associated factor 2 Eaf2



1422121\_at 1.07588 "opioid receptor, delta 1" Oprd1  
1422122\_at 0.99201 "Fc receptor, IgE, low affinity II, alpha polypeptide" Fcgr2a  
1422123\_s\_at 0.94468 CEA-related cell adhesion molecule 1 /// CEA-related cell adhesion molecule  
2 Ceacam1 /// Ceacam2  
1422124\_a\_at 1.01086 "protein tyrosine phosphatase, receptor type, C" Ptpcr  
1422125\_at 0.92403 5-hydroxytryptamine (serotonin) receptor 2B Htr2b  
1422126\_a\_at 1.03625 nudix (nucleoside diphosphate linked moiety X)-type motif 13 Nudt13  
1422127\_at 1.05276 desert hedgehog Dhh  
1422128\_at 1.09024 ribosomal protein L14 Rpl14  
1422129\_at 0.95053 adenomatous polyposis coli 2 Apc2  
1422130\_at 1.00320 neuronal pentraxin 1 Nptx1  
1422131\_at 0.95031 decapping enzyme Dcp1a  
1422132\_at 0.92896 "5,10-methylenetetrahydrofolate reductase" Mthfr  
1422133\_at 0.99568 sialophorin Spn  
1422134\_at 0.56161 FBJ osteosarcoma oncogene B Fosb  
1422135\_at 1.05398 similar to zinc finger protein 146 LOC677248  
1422136\_at 1.12867 U2AF homology motif (UHM) kinase 1 /// similar to U2AF homology motif  
(UHM) kinase 1 Uhmk1 /// LOC677213  
1422137\_at 0.93599 RIKEN cDNA 9030623N16 gene 9030623N16Rik  
1422138\_at 0.94315 "plasminogen activator, urokinase" Plau  
1422139\_at 0.84730 "plasminogen activator, urokinase" Plau  
1422140\_at 0.96519 similar to component of Sp100-rs /// similar to component of Sp100-rs ///  
similar to component of Sp100-rs /// similar to component of Sp100-rs /// similar to component of Sp100-  
rs /// similar to component of Sp100-rs /// similar to component of Sp100-rs /// similar to component of  
Sp100-rs /// similar to component of Sp100-rs /// similar to component of Sp100-rs Sp100-rs ///  
LOC620113 /// LOC665338 /// LOC665378 /// LOC673083 /// LOC673135 /// LOC673206 ///  
LOC673671 /// LOC673849 /// LOC673997  
1422141\_s\_at 0.99968 component of Sp100-rs Csprs  
1422142\_at 1.03863 "nephrosis 1 homolog, nephrin (human)" Nphs1  
1422143\_at 0.95824 A kinase (PKA) anchor protein 7 Akap7  
1422144\_at 0.98659 inhibin beta E Inhbe  
1422145\_at 1.02896 mannoside acetylglucosaminyltransferase 3 Mgat3  
1422146\_at 0.87925 "sema domain, seven thrombospondin repeats (type 1 and type 1-like),  
transmembrane domain (TM) and short cytoplasmic domain, (semaphorin) 5B" Sema5b  
1422147\_a\_at 1.08325 "phospholipase A2, group VI" Pla2g6  
1422148\_at 0.89499 matrilin 3 Matn3  
1422149\_at 0.95255 myeloid/lymphoid or mixed lineage-leukemia translocation to 7 homolog  
(Drosophila) Mllt7  
1422150\_at 0.94855 H6 homeo box 3 Hmx3  
1422151\_at 1.05013 opposite strand transcription unit to Stag3 Gats  
1422152\_at 0.82182 H6 homeo box 1 Hmx1  
1422153\_a\_at 0.97081 ankyrin repeat and SOCS box-containing protein 11 Asb11  
1422154\_at 0.84525 G protein-coupled receptor 27 Gpr27

1422155\_at 1.01345 "histone 2, H3c2" Hist2h3c2  
 1422156\_a\_at 1.02494 ribosomal protein S2 /// similar to 40S ribosomal protein S2 /// similar to 40S  
 ribosomal protein S2 /// similar to 40S ribosomal protein S2 /// similar to 40S ribosomal protein S2 ///  
 similar to 40S ribosomal protein S2 /// similar to 40S ribosomal protein S2 /// similar to 40S ribosomal  
 protein S2 /// similar to 40S ribosomal protein S2 /// similar to 40S ribosomal protein S2 /// similar to  
 40S ribosomal protein S2 /// similar to 40S ribosomal protein S2 /// similar to 40S ribosomal protein  
 S2 /// similar to 40S ribosomal protein S2 /// similar to 40S ribosomal protein S2 /// similar to 40S  
 ribosomal protein S2 /// similar to 40S ribosomal protein S2 /// similar to 40S ribosomal protein S2 ///  
 similar to 40S ribosomal protein S2 /// similar to 40S ribosomal protein S2 /// similar to 40S ribosomal  
 protein S2 /// similar to 40S ribosomal protein S2 /// similar to 40S ribosomal protein S2 Rps2 ///  
 LOC544872 /// LOC546164 /// LOC546298 /// LOC620248 /// LOC620559 /// LOC623242 ///  
 LOC628962 /// LOC637606 /// LOC664975 /// LOC665951 /// LOC667279 /// LOC667846 ///  
 LOC667847 /// LOC669206 /// LOC669347 /// LOC670479 /// LOC671929 /// LOC672594 ///  
 LOC674755 /// LOC675043 /// LOC676775 /// LOC677135  
 1422157\_a\_at 1.19510 integrin beta 1 binding protein 1 Itgb1bp1  
 1422158\_at 1.01172 calsyntenin 2 Clstn2  
 1422159\_at 1.03789 "protein phosphatase, EF hand calcium-binding domain 2" Ppef2  
 1422160\_at 1.10980 "histocompatibility 2, T region locus 24" H2-T24  
 1422161\_at 1.05310 "sialic acid binding Ig-like lectin 1, sialoadhesin" Siglec1  
 1422162\_at 0.87774 deleted in colorectal carcinoma Dcc  
 1422163\_at 0.90273 SH3 and PX domains 2A Sh3pxd2a  
 1422164\_at 1.04403 "POU domain, class 3, transcription factor 4" Pou3f4  
 1422165\_at 0.89677 "POU domain, class 3, transcription factor 4" Pou3f4  
 1422166\_at 0.99370 "C-type lectin domain family 2, member i" Clec2i  
 1422167\_at 1.03423 "sema domain, seven thrombospondin repeats (type 1 and type 1-like),  
 transmembrane domain (TM) and short cytoplasmic domain, (semaphorin) 5A" Sema5a  
 1422168\_a\_at 0.88026 brain derived neurotrophic factor Bdnf  
 1422169\_a\_at 0.87686 brain derived neurotrophic factor Bdnf  
 1422170\_at 1.18834 "solute carrier family 5 (inositol transporters), member 3" Slc5a3  
 1422171\_at 0.89254 prostaglandin D receptor Ptgdr  
 1422172\_x\_at 0.89511 RIKEN cDNA 2810408B13 gene 2810408B13Rik  
 1422173\_at 0.98825 "insulin promoter factor 1, homeodomain transcription factor" Ipf1  
 1422174\_at 1.02559 "insulin promoter factor 1, homeodomain transcription factor" Ipf1  
 1422175\_at 1.06220 matrix metalloproteinase 1a (interstitial collagenase) /// similar to matrix  
 metalloproteinase 1a (interstitial collagenase) Mmp1a /// LOC672109  
 1422176\_at 1.02914 fibroblast growth factor 23 Fgf23  
 1422177\_at 1.09138 "interleukin 13 receptor, alpha 2" Il13ra2  
 1422178\_a\_at 0.87058 "RAB17, member RAS oncogene family" Rab17  
 1422179\_at 1.24857 gap junction membrane channel protein beta 4 Gjb4  
 1422180\_a\_at 0.90359 mast cell protease 6 Mcpt6  
 1422181\_at 1.04421 cyclic nucleotide gated channel alpha 2 Cnga2  
 1422182\_at 1.01612 "hepatocyte nuclear factor 4, gamma" Hnf4g  
 1422183\_a\_at 0.82987 "adrenergic receptor, alpha 1b" Adra1b

1422184\_a\_at 0.77704 adenylate kinase 1 Ak1  
1422185\_a\_at 1.00601 cytochrome b5 reductase 3 Cyb5r3  
1422186\_s\_at 0.98698 cytochrome b5 reductase 3 Cyb5r3  
1422187\_at 0.86198 "gamma-aminobutyric acid (GABA-A) receptor, subunit gamma 3" Gabrg3  
1422188\_s\_at 0.96188 "T-cell receptor gamma chain /// T cell receptor gamma chain /// region containing T-cell receptor gamma chain; T-cell receptor gamma, variable 4" Tcrg /// LOC670271  
1422189\_x\_at 1.06588 "T-cell receptor gamma chain /// region containing T-cell receptor gamma chain; T-cell receptor gamma, variable 4" Tcrg /// LOC670271  
1422190\_at 0.96201 complement component 5a receptor 1 C5ar1  
1422191\_at 0.99479 CD200 receptor 1 Cd200r1  
1422192\_at 1.00079 gap junction membrane channel protein alpha 5 Gja5  
1422193\_at 1.04765 guanylate cyclase 2e Gucy2e  
1422194\_at 1.00717 "sodium channel, voltage-gated, type V, alpha" Scn5a  
1422195\_s\_at 0.79393 T-box 15 Tbx15  
1422196\_at 1.00468 5-hydroxytryptamine (serotonin) receptor 5B Htr5b  
1422197\_at 0.93716 "potassium voltage-gated channel, shaker-related subfamily, member 2" Kcna2  
1422198\_a\_at 1.14878 serine hydroxymethyl transferase 1 (soluble) Shmt1  
1422199\_at 0.94633 olfactory marker protein Omp  
1422200\_at 0.97545 olfactory marker protein Omp  
1422201\_at 1.09416 --- ---  
1422202\_at 0.92913 thyroid hormone receptor beta Thrb  
1422203\_at 0.92239 "solute carrier family 18 (vesicular monoamine), member 3" Slc18a3  
1422204\_at 0.94170 arginine vasopressin receptor 1B Avpr1b  
1422205\_at 0.97753 SRY-box containing gene 1 Sox1  
1422206\_at 0.97886 "UDP-Gal:betaGlcNAc beta 1,3-galactosyltransferase, polypeptide 1" B3galt1  
1422207\_at 1.09572 5-hydroxytryptamine (serotonin) receptor 5A Htr5a  
1422208\_a\_at 0.78333 "guanine nucleotide binding protein, beta 5" Gnb5  
1422209\_s\_at 0.99705 keratin associated protein 9-1 /// similar to keratin associated protein 9-1 /// similar to keratin associated protein 9-1 /// similar to keratin associated protein 9-1 Krtap9-1 /// LOC432600 /// LOC546515 /// LOC670533  
1422210\_at 1.05256 forkhead box D3 Foxd3  
1422211\_a\_at 0.89466 "UDP-GlcNAc:betaGal beta-1,3-N-acetylglucosaminyltransferase 3" B3gnt3  
1422212\_at 0.89625 forkhead box H1 Foxh1  
1422213\_s\_at 0.88695 forkhead box H1 Foxh1  
1422214\_at 0.97070 neuropeptide FF receptor 2 Npffr2  
1422215\_at 1.06346 RIKEN cDNA 4930542C12 gene 4930542C12Rik  
1422216\_at 0.82226 midline 2 Mid2  
1422217\_a\_at 0.44727 "cytochrome P450, family 1, subfamily a, polypeptide 1" Cyp1a1  
1422218\_at 0.94056 "purinergic receptor P2X, ligand-gated ion channel, 7" P2rx7  
1422219\_a\_at 0.94517 T-box 20 Tbx20  
1422220\_at 1.00087 pituitary specific transcription factor 1 Pit1  
1422221\_at 0.92561 heart and neural crest derivatives expressed transcript 2 Hand2

1422222\_at 0.82475 involucrin Iv1  
1422223\_at 1.12226 "glutamate receptor, ionotropic, NMDA2B (epsilon 2)" Grin2b  
1422224\_at 1.10119 t-complex protein 10a /// t-complex protein 10b /// t-complex protein 10c  
Tcp10a /// Tcp10b /// Tcp10c  
1422225\_s\_at 0.93059 t-complex protein 10a /// t-complex protein 10b /// t-complex protein 10c  
Tcp10a /// Tcp10b /// Tcp10c  
1422226\_at 0.72486 --- ---  
1422227\_at 1.04668 Kruppel-like factor 12 /// RIKEN cDNA D530033K05 gene Klf12 ///  
D530033K05Rik  
1422228\_at 1.04771 wingless-related MMTV integration site 8A Wnt8a  
1422229\_at 0.86017 deubiquitinating enzyme 2 Dub2  
1422230\_s\_at 1.02425 "cytochrome P450, family 2, subfamily a, polypeptide 4 /// cytochrome P450,  
family 2, subfamily a, polypeptide 5" Cyp2a4 /// Cyp2a5  
1422231\_a\_at 1.01466 "tumor necrosis factor receptor superfamily, member 25" Tnfrsf25  
1422232\_at 0.88280 paired-like homeobox 2b Phox2b  
1422233\_at 0.93451 "ELK4, member of ETS oncogene family" Elk4  
1422234\_at 0.93533 tachykinin receptor 2 Tacr2  
1422235\_at 0.92600 5-hydroxytryptamine (serotonin) receptor 7 Htr7  
1422236\_at 1.00113 RIKEN cDNA 4930560E09 gene 4930560E09Rik  
1422237\_at 0.89155 melanocortin 3 receptor Mc3r  
1422238\_at 0.97477 upregulated during skeletal muscle growth 1 Usmg1  
1422239\_at 0.73206 homeo box D13 Hoxd13  
1422240\_s\_at 1.00084 small proline-rich protein 2H Sprr2h  
1422241\_a\_at 0.95360 "NADH dehydrogenase (ubiquinone) 1 alpha subcomplex, 1" Ndufa1  
1422242\_at 0.92372 "defensin related cryptdin, related sequence 10" Defcr-rs10  
1422243\_at 1.11509 fibroblast growth factor 7 Fgf7  
1422244\_at 0.94826 "polycystic kidney disease (polycystin) and REJ (sperm receptor for egg jelly,  
sea urchin homolog)-like" Pkdrej  
1422245\_a\_at 1.04665 MRV integration site 1 Mrvi1  
1422246\_at 1.07816 dentin sialophosphoprotein Dspp  
1422247\_a\_at 1.12670 "ubiquitously transcribed tetratricopeptide repeat gene, Y chromosome" Uty  
1422248\_at 0.83123 insulin receptor substrate 4 /// similar to insulin receptor substrate 4 Irs4 ///  
LOC669982  
1422249\_s\_at 0.78528 "zinc finger protein, autosomal /// zinc finger protein X-linked" Zfa /// Zfx  
1422250\_at 0.87330 mitogen activated protein kinase kinase kinase 2 Map3k2  
1422251\_at 1.05418 neuralized-like homolog (Drosophila) Neurl  
1422252\_a\_at 1.02318 cell division cycle 25 homolog C (S. cerevisiae) Cdc25c  
1422253\_at 0.81023 "procollagen, type X, alpha 1" Col10a1  
1422254\_a\_at 0.92333 dual-specificity tyrosine-(Y)-phosphorylation regulated kinase 1b Dyrk1b  
1422255\_at 0.96161 "potassium voltage-gated channel, shaker-related subfamily, member 4" Kcna4  
1422256\_at 1.07486 somatostatin receptor 2 Sstr2  
1422257\_s\_at 0.90498 "cytochrome P450, family 2, subfamily b, polypeptide 10" Cyp2b10  
1422258\_at 0.93191 "cholinergic receptor, muscarinic 3, cardiac" Chrm3

|              |         |                                                          |               |
|--------------|---------|----------------------------------------------------------|---------------|
| 1422259_a_at | 1.05293 | chemokine (C-C motif) receptor 5                         | Ccr5          |
| 1422260_x_at | 1.03593 | chemokine (C-C motif) receptor 5                         | Ccr5          |
| 1422261_a_at | 0.96116 | mutS homolog 3 (E. coli)                                 | Msh3          |
| 1422262_a_at | 0.85597 | LIM homeobox protein 6                                   | Lhx6          |
| 1422263_at   | 1.03179 | "bradykinin receptor, beta 2"                            | Bdkrb2        |
| 1422264_s_at | 0.87984 | Kruppel-like factor 9                                    | Klf9          |
| 1422265_at   | 1.21806 | bombesin-like receptor 3                                 | Brs3          |
| 1422266_at   | 0.75085 | "myc-like oncogene, s-myc protein"                       | Mycs          |
| 1422267_at   | 0.91282 | forkhead box B2                                          | Foxb2         |
| 1422268_a_at | 0.99043 | "ribosomal protein S6 kinase, polypeptide 2"             | Rps6kb2       |
| 1422269_at   | 1.06175 | insulinoma-associated 2                                  | Insm2         |
| 1422270_a_at | 0.97359 | "interleukin 6 receptor, alpha"                          | Il6ra         |
| 1422271_at   | 0.86442 | pancreatic polypeptide receptor 1                        | Ppyr1         |
| 1422272_at   | 2.91765 | per-hexamer repeat gene 4                                | Phxr4         |
| 1422273_at   | 0.94575 | matrix metalloproteinase 1b (interstitial collagenase)   | Mmp1b         |
| 1422274_at   | 0.88308 | gap junction membrane channel protein alpha 8            | Gja8          |
| 1422275_at   | 1.01838 | G protein-coupled receptor 44                            | Gpr44         |
| 1422276_at   | 0.98819 | "pyrimidinergic receptor P2Y, G-protein coupled, 4"      | P2ry4         |
| 1422277_at   | 0.98008 | "glycine receptor, alpha 1 subunit"                      | Gla1          |
| 1422278_at   | 0.99945 | dopamine receptor 3                                      | Drd3          |
| 1422279_at   | 1.16205 | Friend virus susceptibility 1                            | Fv1           |
| 1422280_at   | 1.05601 | granzyme K                                               | Gzmk          |
| 1422281_at   | 0.87981 | somatostatin receptor 4                                  | Sstr4         |
| 1422282_at   | 0.97280 | tachykinin receptor 1                                    | Tacr1         |
| 1422283_at   | 1.03152 | CD40 ligand                                              | Cd40lg        |
| 1422284_at   | 1.03924 | "NK2 transcription factor related, locus 9 (Drosophila)" | Nkx2-9        |
| 1422285_at   | 1.01359 | orthopedia homolog (Drosophila)                          | Otp           |
| 1422286_a_at | 0.98171 | TG interacting factor                                    | Tgif          |
| 1422287_at   | 0.99936 | per-hexamer repeat gene 2                                | Phxr2         |
| 1422288_at   | 0.82925 | 5-hydroxytryptamine (serotonin) receptor 1B              | Htr1b         |
| 1422289_a_at | 0.94370 | cathepsin Q                                              | Ctsq          |
| 1422290_at   | 1.00707 | 5-hydroxytryptamine (serotonin) receptor 1D              | Htr1d         |
| 1422291_at   | 1.11825 | chemokine (C-C motif) receptor 8                         | Ccr8          |
| 1422292_at   | 0.83746 | RIKEN cDNA A030005K14 gene                               | A030005K14Rik |
| 1422293_a_at | 0.70652 | potassium channel tetramerisation domain containing 1    | Kctd1         |
| 1422294_at   | 0.92419 | chemokine (C motif) receptor 1                           | Xcr1          |
| 1422295_at   | 0.93542 | myelodysplasia syndrome 1 homolog (human)                | Mds1          |
| 1422296_at   | 1.09392 | RIKEN cDNA 5730470L24 gene                               | 5730470L24Rik |
| 1422297_at   | 1.06098 | prefoldin 5                                              | Pfdn5         |
| 1422298_at   | 0.99671 | RIKEN cDNA 5530401N06 gene                               | 5530401N06Rik |
| 1422299_a_at | 1.05493 | serine/threonine/tyrosine interacting-like 1             | Styx11        |
| 1422300_at   | 1.11800 | noggin                                                   | Nog           |
| 1422301_at   | 1.11054 | ferritin light chain 2                                   | Ftl2          |

1422302\_s\_at 1.12357 ferritin light chain 1 /// ferritin light chain 2 /// similar to Ferritin light chain 1 (Ferritin L subunit 1) /// similar to Ferritin light chain 1 (Ferritin L subunit 1) /// similar to Ferritin light chain 1 (Ferritin L subunit 1) /// similar to Ferritin light chain 1 (Ferritin L subunit 1) /// similar to Ferritin light chain 1 (Ferritin L subunit 1) /// similar to Ferritin light chain 1 (Ferritin L subunit 1) /// similar to Ferritin light chain 1 (Ferritin L subunit 1) /// Ftl1 /// Ftl2 /// LOC544951 /// LOC634386 /// LOC665937 /// LOC666673 /// LOC669088 /// LOC675170  
 1422303\_a\_at 0.92579 "tumor necrosis factor receptor superfamily, member 18" Tnfrsf18  
 1422304\_at 1.01129 lipocalin 4 Lcn4  
 1422305\_at 1.01487 "interferon beta 1, fibroblast" Ifnb1  
 1422306\_at 0.90379 lipocalin 3 Lcn3  
 1422307\_at 0.82436 --- ---  
 1422308\_a\_at 1.11189 "lectin, galactose binding, soluble 7" Lgals7  
 1422309\_a\_at 0.86042 lens epithelial protein Lenep  
 1422310\_at 1.00958 stannin Snn  
 1422311\_a\_at 0.88744 polymerase (RNA) II (DNA directed) polypeptide A Polr2a  
 1422312\_a\_at 0.88703 neurogenin 3 Neurog3  
 1422313\_a\_at 0.93480 insulin-like growth factor binding protein 5 Igfbp5  
 1422314\_at 0.95498 chloride channel 6 Clcn6  
 1422315\_x\_at 0.97470 phosphorylase kinase gamma 1 Phkg1  
 1422316\_at 1.05624 "glycoprotein 1b, alpha polypeptide" Gp1ba  
 1422317\_a\_at 0.91569 interleukin 1 receptor-like 1 Il1rl1  
 1422318\_at 1.09397 forkhead box D4 Foxd4  
 1422319\_at 1.01978 UDP-N-acetyl-alpha-D-galactosamine:polypeptide N-acetylgalactosaminyltransferase 11 Galnt11  
 1422320\_x\_at 0.95222 per-hexamer repeat gene 5 Phxr5  
 1422321\_a\_at 1.06633 splicing factor 1 Sf1  
 1422322\_at 0.95703 choroideremia-like Chml  
 1422323\_a\_at 0.90171 ladybird homeobox homolog 1 (Drosophila) Lbx1  
 1422324\_a\_at 1.14241 parathyroid hormone-like peptide Pthlh  
 1422325\_at 1.02136 "melanoma antigen, family A, 5" Magea5  
 1422326\_at 1.00225 glucose-6-phosphate dehydrogenase 2 G6pd2  
 1422327\_s\_at 1.10152 glucose-6-phosphate dehydrogenase 2 /// glucose-6-phosphate dehydrogenase X-linked G6pd2 /// G6pdx  
 1422328\_at 0.92952 gap junction membrane channel protein alpha 10 Gja10  
 1422329\_a\_at 0.96457 "neurotrophic tyrosine kinase, receptor, type 3" Ntrk3  
 1422330\_at 0.93714 glucagon-like peptide 1 receptor Glp1r  
 1422331\_at 0.99655 "POU domain, class 3, transcription factor 3" Pou3f3  
 1422332\_at 0.95830 interferon alpha 11 Ifna11  
 1422333\_at 0.99851 "cytochrome P450, family 21, subfamily a, polypeptide 1" Cyp21a1  
 1422334\_a\_at 1.07210 surfactant associated protein A1 Sftpa1  
 1422335\_at 0.99825 "adrenergic receptor, alpha 2c" Adra2c  
 1422336\_at 1.08717 homeo box A13 Hoxa13  
 1422337\_at 0.99288 olfactory receptor 156 Olfr156

1422338\_at 1.04537 G protein-coupled receptor 63 Gpr63  
1422339\_at 0.98649 gap junction membrane channel protein alpha 3 Gja3  
1422340\_a\_at 0.97221 "actin, gamma 2, smooth muscle, enteric" Actg2  
1422341\_s\_at 0.89995 lysophospholipase 3 Lypla3  
1422342\_at 0.92134 neuromedin B receptor Nmbr  
1422343\_at 1.02270 olfactory receptor 155 Olfr155  
1422344\_s\_at 1.01680 "tumor necrosis factor receptor superfamily, member 10b" Tnfrsf10b  
1422345\_s\_at 1.09435 "melanoma antigen, family B, 1 /// melanoma antigen, family B, 2 ///  
melanoma antigen, family B, 3" Mageb1 /// Mageb2 /// Mageb3  
1422346\_at 0.92574 thyroid transcription factor 1 Titf1  
1422347\_at 0.95248 neuropeptide Y receptor Y6 Npy6r  
1422348\_at 1.12060 "similar to H-2 class I histocompatibility antigen, L-D alpha chain precursor"  
LOC676708  
1422349\_at 1.05841 chemokine (C-C motif) receptor 1-like 1 Ccr111  
1422350\_at 0.86948 "formyl peptide receptor, related sequence 3" Fpr-rs3  
1422351\_at 0.98944 olfactory receptor 480 Olfr480  
1422352\_at 0.94687 mast cell protease 1 Mcpt1  
1422353\_at 0.95806 "POU domain, class 4, transcription factor 3" Pou4f3  
1422354\_at 0.85117 olfactory receptor 544 Olfr544  
1422355\_at 0.95743 trace amine-associated receptor 1 Taar1  
1422356\_at 0.96611 "vomeronasal 1 receptor, B10" V1rb10  
1422357\_at 1.02880 "melanoma antigen, family A, 6" Magea6  
1422358\_at 0.91891 "formyl peptide receptor, related sequence 4" Fpr-rs4  
1422359\_at 1.17030 olfactory receptor 690 Olfr690  
1422360\_at 1.09093 olfactory receptor 672 Olfr672  
1422361\_at 1.00213 T lymphoma oncogene Tlm  
1422362\_s\_at 0.97167 olfactory receptor 68 /// olfactory receptor 69 Olfr68 /// Olfr69  
1422363\_at 1.01375 olfactory receptor 65 Olfr64  
1422364\_at 0.97469 olfactory receptor 68 Olfr68  
1422365\_at 0.99588 olfactory receptor 17 Olfr17  
1422366\_at 0.91541 "vomeronasal 1 receptor, A9" V1ra9  
1422367\_at 0.97691 olfactory receptor 70 Olfr70  
1422368\_at 0.90726 "vomeronasal 1 receptor, A5" V1ra5  
1422369\_at 1.03791 "vomeronasal 1 receptor, A6" V1ra6  
1422370\_at 0.80420 olfactory receptor 49 Olfr49  
1422371\_at 0.96665 olfactory receptor 1507 Olfr1507  
1422372\_at 0.97087 olfactory receptor 15 Olfr15  
1422373\_at 0.81318 olfactory receptor 71 Olfr71  
1422374\_s\_at 1.19116 olfactory receptor 64 /// olfactory receptor 66 Olfr65 /// Olfr66  
1422375\_a\_at 0.90127 ADP-ribosyltransferase 1 Art1  
1422376\_at 0.97525 "vomeronasal 1 receptor, B1" V1rb1  
1422377\_at 1.07962 "vomeronasal 1 receptor, B4" V1rb4  
1422378\_at 1.08881 "vomeronasal 1 receptor, B7" V1rb7

1422379\_x\_at 1.14473 "vomeronasal 1 receptor, B9" V1rb9  
1422380\_at 1.04415 "vomeronasal 1 receptor, B5" V1rb5  
1422381\_at 0.87099 olfactory receptor 160 Olfr160  
1422382\_at 1.08059 olfactory receptor 16 Olfr16  
1422383\_at 0.94036 "vomeronasal 1 receptor, B6" V1rb6  
1422384\_at 0.99022 olfactory receptor 1509 Olfr1509  
1422385\_at 0.79631 olfactory receptor 1264 Olfr1264  
1422386\_at 1.11265 olfactory receptor 64 Olfr65  
1422387\_at 0.98928 "vomeronasal 1 receptor, C2" V1rc2  
1422388\_at 1.02178 "vomeronasal 1 receptor, C8" V1rc8  
1422389\_at 1.09756 "taste receptor, type 2, member 105" Tas2r105  
1422390\_at 0.97765 "vomeronasal 1 receptor, C5" V1rc5  
1422391\_at 0.96114 "vomeronasal 1 receptor, C3" V1rc3  
1422392\_at 1.06153 "vomeronasal 1 receptor, C6" V1rc6  
1422393\_at 0.88522 forkhead box E3 Foxe3  
1422394\_at 1.06107 "vomeronasal 1 receptor, C4" V1rc4  
1422395\_at 0.97669 "vomeronasal 1 receptor, C8 /// vomeronasal 1 receptor, C22" V1rc8 ///  
V1rc22  
1422396\_s\_at 0.87184 achaete-scute complex homolog-like 2 (Drosophila) Ascl2  
1422397\_a\_at 1.00191 "interleukin 15 receptor, alpha chain" Il15ra  
1422398\_at 0.95688 "histone 1, H1e" Hist1h1e  
1422399\_a\_at 1.08767 "RAB23, member RAS oncogene family" Rab23  
1422400\_a\_at 0.97096 hematopoietic cell transcript 1 Hemt1  
1422401\_at 0.98338 small proline-rich protein 3 Sprr3  
1422402\_a\_at 0.94006 "ankyrin repeat, SAM and basic leucine zipper domain containing 1" Asz1  
1422403\_at 0.90602 interferon alpha 1 /// interferon alpha 2 /// interferon alpha 4 /// interferon alpha  
5 /// interferon alpha 6 /// interferon alpha 7 /// interferon alpha 9 /// interferon alpha B /// interferon  
alpha 6T /// alpha-interferon /// interferon alpha 12 /// interferon alpha 8/6 precursor; IFNa8/6 ///  
interferon alpha 14 Ifna1 /// Ifna2 /// Ifna4 /// Ifna5 /// Ifna6 /// Ifna7 /// Ifna9 /// Ifnab /// Ifna6T ///  
LOC242517 /// Ifna12 /// LOC384100 /// Ifna14  
1422404\_x\_at 1.04806 interferon alpha 1 /// interferon alpha 2 /// interferon alpha 4 /// interferon alpha  
5 /// interferon alpha 6 /// interferon alpha 7 /// interferon alpha 9 /// interferon alpha B /// interferon  
alpha 6T /// alpha-interferon /// interferon alpha 12 /// interferon alpha 8/6 precursor; IFNa8/6 ///  
interferon alpha 14 Ifna1 /// Ifna2 /// Ifna4 /// Ifna5 /// Ifna6 /// Ifna7 /// Ifna9 /// Ifnab /// Ifna6T ///  
LOC242517 /// Ifna12 /// LOC384100 /// Ifna14  
1422405\_at 0.94848 "histocompatibility 2, D region locus 4" H2-D4  
1422406\_at 0.96014 interferon alpha 9 Ifna9  
1422407\_s\_at 0.99311 Harvey rat sarcoma virus oncogene 1 Hras1  
1422408\_at 0.79137 interferon alpha 4 Ifna4  
1422409\_at 0.94106 hairy and enhancer of split 3 (Drosophila) Hes3  
1422410\_at 1.11453 Fer3-like (Drosophila) Ferd3l  
1422411\_s\_at 0.97308 "eosinophil-associated, ribonuclease A family, member 1 /// eosinophil-  
associated, ribonuclease A family, member 2 /// eosinophil-associated, ribonuclease A family, member



3 /// eosinophil-associated, ribonuclease A family, member 12" Ear1 /// Ear2 /// Ear3 /// Ear12  
 1422412\_x\_at 0.96774 "eosinophil-associated, ribonuclease A family, member 3" Ear3  
 1422413\_at 0.95055 --- ---  
 1422414\_a\_at 1.02939 calmodulin 2 Calm2  
 1422415\_at 0.92053 "angiogenin, ribonuclease A family, member 2" Ang2  
 1422416\_s\_at 0.97892 pre-B lymphocyte gene 1 /// pre-B lymphocyte gene 2 Vpreb1 /// Vpreb2  
 1422417\_at 0.97683 --- ---  
 1422418\_s\_at 1.01985 suppressor of Ty 4 homolog 1 (S. cerevisiae) /// suppressor of Ty 4 homolog 2  
 (S. cerevisiae) Supt4h1 /// Supt4h2  
 1422419\_s\_at 0.90709 transition protein 2 Tnp2  
 1422420\_at 0.99216 myoglobin Mb  
 1422421\_at 0.90675 "defensin related cryptdin, related sequence 12" Defcr-rs12  
 1422422\_at 1.11956 defensin related cryptdin 4 Defcr4  
 1422423\_at 0.98301 "melanoma antigen, family A, 7" Magea7  
 1422424\_at 1.05010 human papillomavirus 18 E5 central sequence motif gene 2 Hpv2  
 1422425\_at 0.98349 small proline-rich protein 2K Sprr2k  
 1422426\_at 0.96508 cell matrix adhesion regulator Cmar  
 1422427\_a\_at 1.06659 "seminal vesicle protein, secretion 2" Svs2  
 1422428\_at 1.18151 acyl-CoA synthetase bubblegum family member 1 Acsbg1  
 1422429\_at 1.10451 ring finger protein 14 Rnf14  
 1422430\_at 1.05130 fidgetin-like 1 Figl1  
 1422431\_at 1.01773 "melanoma antigen, family E, 1" Magee1  
 1422432\_at 1.27036 diazepam binding inhibitor Dbi  
 1422433\_s\_at 1.30445 "isocitrate dehydrogenase 1 (NADP+), soluble" Idh1  
 1422434\_a\_at 1.10813 RIKEN cDNA 2210010C04 gene 2210010C04Rik  
 1422435\_at 0.99871 RIKEN cDNA 2210010C04 gene 2210010C04Rik  
 1422436\_at 1.02849 RIKEN cDNA 2210010C04 gene 2210010C04Rik  
 1422437\_at 0.94837 "procollagen, type V, alpha 2" Col5a2  
 1422438\_at 1.10184 "epoxide hydrolase 1, microsomal" Ephx1  
 1422439\_a\_at 1.05126 cyclin-dependent kinase 4 /// similar to Cell division protein kinase 4 (Cyclin-  
 dependent kinase 4) (PSK-J3) (CRK3) Cdk4 /// LOC640611  
 1422440\_at 1.10902 cyclin-dependent kinase 4 /// similar to Cell division protein kinase 4 (Cyclin-  
 dependent kinase 4) (PSK-J3) (CRK3) Cdk4 /// LOC640611  
 1422441\_x\_at 1.00594 cyclin-dependent kinase 4 Cdk4  
 1422442\_at 1.04626 smu-1 suppressor of mec-8 and unc-52 homolog (C. elegans) Smu1  
 1422443\_at 1.17974 "X-prolyl aminopeptidase (aminopeptidase P) 1, soluble" Xpnpep1  
 1422444\_at 0.97717 integrin alpha 6 Itga6  
 1422445\_at 0.87104 integrin alpha 6 Itga6  
 1422446\_x\_at 0.95800 insulin II Ins2  
 1422447\_at 0.87538 insulin I Ins1  
 1422448\_at 1.38608 trefoil factor 2 (spasmolytic protein 1) Tff2  
 1422449\_s\_at 0.80342 reticulocalbin 2 Rcn2  
 1422450\_at 1.05213 "catenin (cadherin associated protein), delta 1" Ctnnd1

1422451\_at 0.95582 mitochondrial ribosomal protein S21 Mrps21  
1422452\_at 0.93908 Bcl2-associated athanogene 3 Bag3  
1422453\_at 0.98955 pre-mRNA processing factor 8 Prpf8  
1422454\_at 0.91226 keratin 13 Krt13  
1422455\_s\_at 0.96597 N-ethylmaleimide sensitive fusion protein Nsf  
1422456\_at 1.03551 N-ethylmaleimide sensitive fusion protein Nsf  
1422457\_s\_at 1.07222 SMT3 suppressor of mif two 3 homolog 3 (yeast) Sumo3  
1422458\_at 1.04382 T-cell lymphoma breakpoint 1 Tcl1  
1422459\_a\_at 1.06203 "proteasome (prosome, macropain) 26S subunit, non-ATPase, 13" Psmd13  
1422460\_at 1.04194 "MAD2 (mitotic arrest deficient, homolog)-like 1 (yeast)" Mad2l1  
1422461\_at 1.08476 "ATPase family, AAA domain containing 3A" Atad3a  
1422462\_at 1.02593 ubiquitin-conjugating enzyme E2T (putative) Ube2t  
1422463\_a\_at 1.01604 mitochondrial ribosomal protein L3 Mrpl3  
1422464\_at 0.93946 mitochondrial ribosomal protein L3 Mrpl3  
1422465\_a\_at 0.97182 nucleoredoxin Nxn  
1422466\_at 1.00696 nucleoredoxin Nxn  
1422467\_at 0.97757 palmitoyl-protein thioesterase 1 Ppt1  
1422468\_at 0.97911 palmitoyl-protein thioesterase 1 Ppt1  
1422469\_at 1.17849 TANK-binding kinase 1 Tbk1  
1422470\_at 1.35236 "BCL2/adenovirus E1B interacting protein 1, NIP3" Bnip3  
1422471\_at 0.93392 peroxisomal biogenesis factor 13 Pex13  
1422472\_at 1.11895 peroxisomal biogenesis factor 13 Pex13  
1422473\_at 0.80155 "phosphodiesterase 4B, cAMP specific" Pde4b  
1422474\_at 0.94145 "phosphodiesterase 4B, cAMP specific" Pde4b  
1422475\_a\_at 0.99085 ribosomal protein S3a Rps3a  
1422476\_at 0.89322 interferon gamma inducible protein 30 Ifi30  
1422477\_at 0.99634 Cdk5 and Abl enzyme substrate 1 /// similar to Cdk5 and Abl enzyme substrate 1 Cables1 /// LOC635753  
1422478\_a\_at 1.42846 acyl-CoA synthetase short-chain family member 2 Acss2  
1422479\_at 1.38007 acyl-CoA synthetase short-chain family member 2 Acss2  
1422480\_at 0.98046 sorting nexin 3 Snx3  
1422481\_at 0.98644 keratin 1 Krt1  
1422482\_at 1.14184 RuvB-like protein 2 Ruvbl2  
1422483\_a\_at 1.00247 "cytochrome c, somatic /// similar to Cytochrome c, somatic" Cyps /// LOC672195  
1422484\_at 0.95740 "cytochrome c, somatic" Cyps  
1422485\_at 1.00119 MAD homolog 4 (Drosophila) Smad4  
1422486\_a\_at 1.04166 MAD homolog 4 (Drosophila) Smad4  
1422487\_at 1.00579 MAD homolog 4 (Drosophila) Smad4  
1422488\_at 1.15968 NTF2-related export protein 1 Nxt1  
1422489\_at 0.94588 glucosidase 1 Gcs1  
1422490\_at 1.03511 "BCL2/adenovirus E1B interacting protein 1, NIP2" Bnip2  
1422491\_a\_at 1.00523 "BCL2/adenovirus E1B interacting protein 1, NIP2" Bnip2

|              |         |                                                                                          |         |  |
|--------------|---------|------------------------------------------------------------------------------------------|---------|--|
| 1422492_at   | 1.04045 | coproporphyrinogen oxidase                                                               | Cpox    |  |
| 1422493_at   | 0.96749 | coproporphyrinogen oxidase                                                               | Cpox    |  |
| 1422494_s_at | 0.97482 | cell cycle related kinase                                                                | Ccrk    |  |
| 1422495_a_at | 1.01333 | high mobility group nucleosomal binding domain 1                                         | Hmgn1   |  |
| 1422496_at   | 0.91734 | high mobility group nucleosomal binding domain 1                                         | Hmgn1   |  |
| 1422497_at   | 0.90509 | "solute carrier family 30 (zinc transporter), member 5"                                  | Slc30a5 |  |
| 1422498_at   | 0.94569 | "melanoma antigen, family H, 1"                                                          | Mageh1  |  |
| 1422499_at   | 0.93890 | LIM domain and actin binding 1                                                           | Lima1   |  |
| 1422500_at   | 1.01262 | isocitrate dehydrogenase 3 (NAD+) alpha                                                  | Idh3a   |  |
| 1422501_s_at | 0.87755 | isocitrate dehydrogenase 3 (NAD+) alpha                                                  | Idh3a   |  |
| 1422502_at   | 1.03049 | "poly (ADP-ribose) polymerase family, member 1"                                          | Parp1   |  |
| 1422503_s_at | 1.01200 | "poly (ADP-ribose) polymerase family, member 1"                                          | Parp1   |  |
| 1422504_at   | 1.06552 | "glycine receptor, beta subunit"                                                         | Glrb    |  |
| 1422505_at   | 1.07279 | chromatin accessibility complex 1                                                        | Chrac1  |  |
| 1422506_a_at | 1.20639 | cystatin B                                                                               | Cstb    |  |
| 1422507_at   | 1.29093 | cystatin B                                                                               | Cstb    |  |
| 1422508_at   | 1.02333 | "ATPase, H+ transporting, lysosomal V1 subunit A"                                        | Atp6v1a |  |
| 1422509_at   | 1.11344 | U2 small nuclear ribonucleoprotein auxiliary factor (U2AF) 1                             | U2af1   |  |
| 1422510_at   | 1.06001 | "CTD (carboxy-terminal domain, RNA polymerase II, polypeptide A) small phosphatase-like" | Ctdspl  |  |
| 1422511_a_at | 1.01310 | opioid growth factor receptor                                                            | Ogfr    |  |
| 1422512_a_at | 0.96876 | opioid growth factor receptor                                                            | Ogfr    |  |
| 1422513_at   | 1.10660 | cyclin F                                                                                 | Ccnf    |  |
| 1422514_at   | 0.88617 | AE binding protein 1                                                                     | Aebp1   |  |
| 1422515_at   | 0.98331 | "seminal vesicle protein, secretion 7"                                                   | Svs7    |  |
| 1422516_a_at | 1.05418 | fibroblast growth factor (acidic) intracellular binding protein                          | Fibp    |  |
| 1422517_a_at | 1.07544 | "zinc ribbon domain containing, 1"                                                       | Znrd1   |  |
| 1422518_at   | 0.93644 | calcium/calmodulin-dependent serine protein kinase (MAGUK family)                        | Cask    |  |
| 1422519_at   | 0.95176 | calcium/calmodulin-dependent serine protein kinase (MAGUK family)                        | Cask    |  |
| 1422520_at   | 1.02980 | "neurofilament 3, medium"                                                                | Nef3    |  |
| 1422521_at   | 0.86142 | dynactin 1                                                                               | Dctn1   |  |
| 1422522_at   | 0.98370 | "fragile X mental retardation gene 2, autosomal homolog"                                 | Fxr2h   |  |
| 1422523_at   | 0.89862 | silver                                                                                   | Si      |  |
| 1422524_at   | 1.05505 | "ATP-binding cassette, sub-family B (MDR/TAP), member 6"                                 | Abcb6   |  |
| 1422525_at   | 0.87017 | "ATP synthase, H+ transporting, mitochondrial F1F0 complex, subunit e"                   | Atp5k   |  |
| 1422526_at   | 1.15083 | acyl-CoA synthetase long-chain family member 1                                           | Acs11   |  |
| 1422527_at   | 1.19324 | "histocompatibility 2, class II, locus DMA"                                              | H2-DMA  |  |
| 1422528_a_at | 0.74727 | "zinc finger protein 36, C3H type-like 1"                                                | Zfp3611 |  |
| 1422529_s_at | 0.92189 | calsequestrin 2                                                                          | Casq2   |  |
| 1422530_at   | 1.09143 | similar to peripherin 1 LOC673890                                                        |         |  |
| 1422531_at   | 1.07014 | synaptotagmin V                                                                          | Syt5    |  |
| 1422532_at   | 0.81083 | "xeroderma pigmentosum, complementation group C"                                         | Xpc     |  |

|              |         |                                                                                                                 |                 |
|--------------|---------|-----------------------------------------------------------------------------------------------------------------|-----------------|
| 1422533_at   | 1.55909 | "cytochrome P450, family 51"                                                                                    | Cyp51           |
| 1422534_at   | 1.20441 | "cytochrome P450, family 51"                                                                                    | Cyp51           |
| 1422535_at   | 1.01954 | cyclin E2                                                                                                       | Ccne2           |
| 1422536_at   | 0.91630 | "troponin I, cardiac"                                                                                           | Tnni3           |
| 1422537_a_at | 0.75078 | inhibitor of DNA binding 2                                                                                      | Id2             |
| 1422538_at   | 0.96591 | exotoses (multiple)-like 2                                                                                      | Extl2           |
| 1422539_at   | 0.95490 | exotoses (multiple)-like 2                                                                                      | Extl2           |
| 1422540_at   | 0.86516 | fibulin 1                                                                                                       | Fbln1           |
| 1422541_at   | 0.72290 | "protein tyrosine phosphatase, receptor type, M"                                                                | Ptprm           |
| 1422542_at   | 0.95522 | G protein-coupled receptor 34                                                                                   | Gpr34           |
| 1422543_at   | 0.77626 | "ropporin, rhophilin associated protein 1"                                                                      | Ropn1           |
| 1422544_at   | 1.03207 | myosin X                                                                                                        | Myo10           |
| 1422545_at   | 0.92584 | ---                                                                                                             | ---             |
| 1422546_at   | 0.93902 | interleukin enhancer binding factor 3                                                                           | Ilf3            |
| 1422547_at   | 1.08531 | RAN binding protein 1                                                                                           | Ranbp1          |
| 1422548_at   | 1.05174 | dehydrodolichyl diphosphate synthase                                                                            | Dhdds           |
| 1422549_at   | 1.06653 | ADP-ribosylation factor-like 2                                                                                  | Arl2            |
| 1422550_a_at | 1.06463 | microtubule-associated protein 6                                                                                | Mtap6           |
| 1422551_at   | 0.72845 | zinc finger protein 306                                                                                         | Zfp306          |
| 1422552_at   | 1.01995 | "reprimin, TP53 dependent G2 arrest mediator candidate"                                                         | Rprm            |
| 1422553_at   | 0.95831 | phosphatase and tensin homolog                                                                                  | Pten            |
| 1422554_at   | 0.98017 | necdin-like 2                                                                                                   | Ndnl2           |
| 1422555_s_at | 1.05466 | "guanine nucleotide binding protein, alpha 13"                                                                  | Gna13           |
| 1422556_at   | 1.08523 | "guanine nucleotide binding protein, alpha 13"                                                                  | Gna13           |
| 1422557_s_at | 0.98681 | metallothionein 1                                                                                               | Mt1             |
| 1422558_at   | 0.78907 | guanidinoacetate methyltransferase                                                                              | Gamt            |
| 1422559_at   | 1.15158 | ubiquitin-conjugating enzyme E2N                                                                                | Ube2n           |
| 1422560_at   | 1.07881 | "DNA-damage inducible protein 2 /// regulatory solute carrier protein, family 1, member 1"                      | Ddi2 /// Rsc1a1 |
| 1422561_at   | 0.68097 | "a disintegrin-like and metallopeptidase (reprolysin type) with thrombospondin type 1 motif, 5 (aggrecanase-2)" | Adamts5         |
| 1422562_at   | 0.93735 | Ras-related associated with diabetes                                                                            | Rrad            |
| 1422563_at   | 1.02467 | complement receptor related protein                                                                             | Crry            |
| 1422564_at   | 0.98831 | actin-like 6B                                                                                                   | Actl6b          |
| 1422565_s_at | 0.88906 | nuclear factor I/C                                                                                              | Nfic            |
| 1422566_at   | 0.88485 | transcription factor EB                                                                                         | Tcf7            |
| 1422567_at   | 0.94249 | niban protein                                                                                                   | Niban           |
| 1422568_at   | 0.96614 | nuclear distribution gene E-like homolog 1 (A. nidulans)                                                        | Ndel1           |
| 1422569_at   | 1.02320 | YY1 transcription factor                                                                                        | Yy1             |
| 1422570_at   | 0.96071 | ---                                                                                                             | ---             |
| 1422571_at   | 1.06976 | thrombospondin 2                                                                                                | Thbs2           |
| 1422572_at   | 0.98087 | "ras homolog gene family, member G"                                                                             | Rhog            |
| 1422573_at   | 1.24993 | AMP deaminase 3                                                                                                 | Ampd3           |

1422574\_at 0.89186 Max dimerization protein 4 Mxd4  
 1422575\_at 0.93345 Max dimerization protein 4 /// similar to Max dimerization protein 4 Mxd4 ///  
 LOC635153  
 1422576\_at 0.92993 ataxin 10 Atxn10  
 1422577\_at 1.02522 citrate synthase Cs  
 1422578\_at 1.05509 citrate synthase Cs  
 1422579\_at 1.12180 "heat shock protein 1 (chaperonin 10) /// similar to 10 kDa heat shock protein,  
 mitochondrial (Hsp10) (10 kDa chaperonin) (CPN10) /// similar to 10 kDa heat shock protein,  
 mitochondrial (Hsp10) (10 kDa chaperonin) (CPN10)" Hspe1 /// LOC628438 /// LOC636088  
 1422580\_at 0.82980 "myosin, light polypeptide 4" Myl4  
 1422581\_at 0.84012 protein inhibitor of activated STAT 1 Pias1  
 1422582\_at 0.99612 leptin Lep  
 1422583\_at 1.31085 "RAB3B, member RAS oncogene family" Rab3b  
 1422584\_at 1.04409 superkiller viralicidic activity 2-like (S. cerevisiae) Skiv21  
 1422585\_at 1.03562 outer dense fiber of sperm tails 1 Odf1  
 1422586\_at 0.96078 endothelin converting enzyme-like 1 Ecel1  
 1422587\_at 0.99891 transmembrane protein 45a Tmem45a  
 1422588\_at 0.94039 keratin 6B Krt6b  
 1422589\_at 0.83030 "RAB3A, member RAS oncogene family" Rab3a  
 1422590\_at 1.03300 cyclin-dependent kinase 5 Cdk5  
 1422591\_at 1.06344 "transcription elongation factor B (SIII), polypeptide 3" Tceb3  
 1422592\_at 1.03264 "catenin (cadherin associated protein), delta 2" Ctnnd2  
 1422593\_at 0.98620 "adaptor-related protein complex 3, sigma 1 subunit" Ap3s1  
 1422594\_at 1.01077 RIKEN cDNA 5730470L24 gene 5730470L24Rik  
 1422595\_s\_at 0.95973 RIKEN cDNA 5730470L24 gene 5730470L24Rik  
 1422596\_at 0.84477 RIKEN cDNA C030019F02 gene C030019F02Rik  
 1422597\_at 0.69120 matrix metalloproteinase 15 Mmp15  
 1422598\_at 0.94900 calsequestrin 1 Casq1  
 1422599\_s\_at 1.00005 zinc finger protein 143 Zfp143  
 1422600\_at 1.21460 RAS protein-specific guanine nucleotide-releasing factor 1 Rasgrf1  
 1422601\_at 1.11958 "serine (or cysteine) peptidase inhibitor, clade B, member 9" Serpinb9  
 1422602\_a\_at 1.00321 wingless-related MMTV integration site 5B Wnt5b  
 1422603\_at 0.90704 "ribonuclease, RNase A family 4" Rnase4  
 1422604\_at 0.93051 urate oxidase Uox  
 1422605\_at 1.00033 "protein phosphatase 1, regulatory (inhibitor) subunit 1A" Ppp1r1a  
 1422606\_at 0.95862 C1q and tumor necrosis factor related protein 3 C1qtnf3  
 1422607\_at 0.99214 ets variant gene 1 Etv1  
 1422608\_at 1.02222 cAMP-regulated phosphoprotein 19 /// RIKEN cDNA 2700024H10 gene  
 Arpp19 /// 2700024H10Rik  
 1422609\_at 0.88978 cAMP-regulated phosphoprotein 19 Arpp19  
 1422610\_s\_at 0.99607 insulin-like growth factor 2 mRNA binding protein 3 Igf2bp3  
 1422611\_s\_at 1.07797 insulin-like growth factor 2 mRNA binding protein 3 Igf2bp3  
 1422612\_at 1.85998 hexokinase 2 Hk2

1422613\_a\_at 1.03805 ribosomal protein L7a Rpl7a  
 1422614\_s\_at 1.02646 "biogenesis of lysosome-related organelles complex-1, subunit 1" Bloc1s1  
 1422615\_at 1.13942 mitogen-activated protein kinase kinase kinase 4 Map4k4  
 1422616\_s\_at 1.00925 WD repeat domain 54 Wdr54  
 1422617\_at 1.01550 "Xmr protein /// similar to Xlr-related, meiosis regulated /// similar to Xlr-related, meiosis regulated /// similar to Synaptonemal complex protein 3 (SCP-3) /// similar to Xlr-related, meiosis regulated /// similar to Xlr-related, meiosis regulated" Xmr ///  
 LOC546272 /// LOC619991 /// LOC664810 /// LOC664861 /// LOC664877 /// LOC664890 ///  
 LOC664906 /// LOC664923 /// LOC664944 /// LOC664989  
 1422618\_x\_at 1.10673 "Xmr protein /// similar to Xlr-related, meiosis regulated /// similar to Xlr-related, meiosis regulated /// similar to Synaptonemal complex protein 3 (SCP-3) /// similar to Xlr-related, meiosis regulated /// similar to Xlr-related, meiosis regulated" Xmr ///  
 LOC546272 /// LOC619991 /// LOC664810 /// LOC664861 /// LOC664877 /// LOC664890 ///  
 LOC664906 /// LOC664923 /// LOC664944 /// LOC664989  
 1422619\_at 1.15459 phosphatidic acid phosphatase 2a Ppap2a  
 1422620\_s\_at 1.11905 phosphatidic acid phosphatase 2a Ppap2a  
 1422621\_at 1.04340 RAN binding protein 2 Ranbp2  
 1422622\_at 1.22229 "nitric oxide synthase 3, endothelial cell" Nos3  
 1422623\_x\_at 1.03418 Ribosomal protein L41 Rpl41  
 1422624\_at 1.26437 REV1-like (*S. cerevisiae*) Rev1l  
 1422625\_at 0.98947 "lymphocyte antigen 6 complex, locus H" Ly6h  
 1422626\_at 0.98850 matrix metalloproteinase 16 Mmp16  
 1422627\_a\_at 1.00341 McKusick-Kaufman syndrome protein Mkks  
 1422628\_at 0.96568 RIKEN cDNA 4632417K18 gene 4632417K18Rik  
 1422629\_s\_at 0.90321 shroom family member 3 Shroom3  
 1422630\_at 1.06849 RAD50 homolog (*S. cerevisiae*) Rad50  
 1422631\_at 0.83170 aryl-hydrocarbon receptor Ahr  
 1422632\_at 1.03537 cathepsin W Ctsw  
 1422633\_at 0.97294 RIKEN cDNA 1700020D05 gene 1700020D05Rik  
 1422634\_a\_at 0.94854 V-set and immunoglobulin domain containing 2 Vsig2  
 1422635\_at 0.95999 acetylcholinesterase Ache  
 1422636\_at 0.88322 cyclin D binding myb-like transcription factor 1 Dmtf1  
 1422637\_at 0.81576 Ras association (RalGDS/AF-6) domain family 5 Rassf5  
 1422638\_s\_at 0.85158 Ras association (RalGDS/AF-6) domain family 5 Rassf5  
 1422639\_at 1.00308 "calcitonin-related polypeptide, beta" Calcb  
 1422640\_at 0.77191 protocadherin beta 9 Pcdhb9  
 1422641\_at 0.92168 docking protein 5 Dok5  
 1422642\_at 0.76516 CDC42 effector protein (Rho GTPase binding) 3 Cdc42ep3  
 1422643\_at 1.03057 "monooxygenase, DBH-like 1" Moxd1

1422644\_at 1.06497 SH3-binding domain glutamic acid-rich protein Sh3bgr  
 1422645\_at 0.96127 hemochromatosis Hfe  
 1422646\_at 1.00655 MAX gene associated Mga  
 1422647\_at 0.95079 ring finger protein 1 Ring1  
 1422648\_at 1.10487 "solute carrier family 7 (cationic amino acid transporter, y+ system), member 2" Slc7a2  
 1422649\_at 1.02366 contactin 6 Cntn6  
 1422650\_a\_at 1.10462 RIO kinase 3 (yeast) Riok3  
 1422651\_at 0.94976 "adiponectin, C1Q and collagen domain containing" Adipoq  
 1422652\_at 1.05942 "crystallin, gamma A" Cryga  
 1422653\_at 0.95142 centrosomal protein 70 Cep70  
 1422654\_at 1.03925 "sarcoglycan, alpha (dystrophin-associated glycoprotein)" Sgca  
 1422655\_at 0.98698 patched homolog 2 Ptch2  
 1422656\_at 0.94275 "RAS-like, family 2, locus 9" Rasl2-9  
 1422657\_at 0.93664 prolactin-like protein L Prlpl  
 1422658\_at 1.00514 "phospholipase C, zeta 1" Plcz1  
 1422659\_at 1.09466 "calcium/calmodulin-dependent protein kinase II, delta" Camk2d  
 1422660\_at 1.16031 similar to Putative RNA-binding protein 3 (RNA-binding motif protein 3)  
 LOC671237  
 1422661\_at 1.04943 "lectin, galactose binding, soluble 8" Lgals8  
 1422662\_at 1.05354 "lectin, galactose binding, soluble 8" Lgals8  
 1422663\_at 1.36690 "origin recognition complex, subunit 1-like (S.cerevisiae)" Orc11  
 1422664\_at 0.99462 "RAB10, member RAS oncogene family" Rab10  
 1422665\_a\_at 0.97020 protein-L-isoaspartate (D-aspartate) O-methyltransferase 1 Pcmt1  
 1422666\_at 1.02863 Casitas B-lineage lymphoma c Cblc  
 1422667\_at 0.91282 keratin 15 Krt15  
 1422668\_at 1.58161 "serine (or cysteine) peptidase inhibitor, clade B, member 9b" Serpinb9b  
 1422669\_at 0.89880 estrogen receptor-binding fragment-associated gene 9 Ebag9  
 1422670\_at 0.98104 Rho family GTPase 2 Rnd2  
 1422671\_s\_at 0.86503 N-acetylated alpha-linked acidic dipeptidase 2 Naalad2  
 1422672\_at 0.93316 small proline-rich protein 1B Sprr1b  
 1422673\_at 0.86622 "protein kinase C, mu" Prkcm  
 1422674\_s\_at 0.98070 "crystallin, gamma B /// crystallin, gamma C" Crygb /// Crygc  
 1422675\_at 1.06267 "SWI/SNF related, matrix associated, actin dependent regulator of chromatin, subfamily e, member 1" Smarce1  
 1422676\_at 0.92850 "SWI/SNF related, matrix associated, actin dependent regulator of chromatin, subfamily e, member 1" Smarce1  
 1422677\_at 0.96463 diacylglycerol O-acyltransferase 2 Dgat2  
 1422678\_at 0.97538 diacylglycerol O-acyltransferase 2 Dgat2  
 1422679\_s\_at 0.97180 "Ctr9, Paf1/RNA polymerase II complex component, homolog (S. cerevisiae)" Ctr9  
 1422680\_at 1.02775 "Ctr9, Paf1/RNA polymerase II complex component, homolog (S. cerevisiae)" Ctr9

1422681\_at 0.96512 "Ctr9, Paf1/RNA polymerase II complex component, homolog (S. cerevisiae)" Ctr9  
 1422682\_s\_at 0.90151 "protease, serine, 3 /// protease, serine, 1 (trypsin 1) /// trypsinogen 12" Prss3 /// Prss1 /// LOC436523  
 1422683\_at 1.07279 interleukin-1 receptor-associated kinase 1 binding protein 1 Irak1bp1  
 1422684\_a\_at 0.90095 exocyst complex component 4 Exoc4  
 1422685\_at 0.99379 exocyst complex component 4 Exoc4  
 1422686\_s\_at 0.96701 exocyst complex component 4 Exoc4  
 1422687\_at 1.02437 --- ---  
 1422688\_a\_at 1.04845 neuroblastoma ras oncogene Nras  
 1422689\_at 0.90047 RIKEN cDNA 4930547C10 gene 4930547C10Rik  
 1422690\_at 0.91088 "serine palmitoyltransferase, long chain base subunit 1" Sptlc1  
 1422691\_at 0.96056 "serine palmitoyltransferase, long chain base subunit 1" Sptlc1  
 1422692\_at 0.89810 SUB1 homolog (S. cerevisia Sub1  
 1422693\_a\_at 1.10476 SUB1 homolog (S. cerevisia Sub1  
 1422694\_at 0.96410 tweety homolog 1 (Drosophila) Ttyh1  
 1422695\_at 0.93865 "tweety homolog 1 (Drosophila) /// TAF1 RNA polymerase II, TATA box binding protein (TBP)-associated factor" Ttyh1 /// Taf1  
 1422696\_at 0.91847 tweety homolog 1 (Drosophila) Ttyh1  
 1422697\_s\_at 0.99285 --- ---  
 1422698\_s\_at 0.94089 "jumonji, AT rich interactive domain 2" Jarid2  
 1422699\_at 1.02867 arachidonate 12-lipoxygenase Alox12  
 1422700\_at 1.00340 arachidonate 12-lipoxygenase Alox12  
 1422701\_at 0.92776 zeta-chain (TCR) associated protein kinase Zap70  
 1422702\_at 0.94177 antizyme inhibitor 1 Azin1  
 1422703\_at 0.94171 glycerol kinase Gyk  
 1422704\_at 1.11499 glycerol kinase Gyk  
 1422705\_at 0.57493 "transmembrane, prostate androgen induced RNA" Tmepai  
 1422706\_at 0.73214 similar to Nedd4 WW binding protein 4 LOC637870  
 1422707\_at 0.95861 "phosphoinositide-3-kinase, catalytic, gamma polypeptide" Pik3cg  
 1422708\_at 1.08766 "phosphoinositide-3-kinase, catalytic, gamma polypeptide" Pik3cg  
 1422709\_a\_at 1.09719 WD repeat domain 46 Wdr46  
 1422710\_a\_at 0.96168 "calcium channel, voltage-dependent, T type, alpha 1H subunit" Cacna1h  
 1422711\_a\_at 1.23811 pregnancy upregulated non-ubiquitously expressed CaM kinase Pnck  
 1422712\_a\_at 1.04249 ubiquitin-conjugating enzyme E2I Ube2i  
 1422713\_a\_at 0.91996 ubiquitin-conjugating enzyme E2I Ube2i  
 1422714\_at 0.91530 "ubiquitin-conjugating enzyme E2I /// similar to Chain A, Human Ubiquitin-Conjugating Enzyme Ubc9 /// similar to Ubiquitin-conjugating enzyme E2 I (Ubiquitin-protein ligase I) (Ubiquitin carrier protein I) (SUMO-1-protein ligase) (SUMO-1-conjugating enzyme) (Ubiquitin-conjugating enzyme UbcE2A)" Ube2i /// LOC546265 /// LOC669417  
 1422715\_s\_at 1.01624 "acid phosphatase 1, soluble /// similar to acid phosphatase 1, soluble /// similar to acid phosphatase 1 isoform b /// similar to acid phosphatase 1 isoform b /// similar to acid phosphatase 1 isoform b" Acp1 /// LOC631286 /// LOC668486 /// LOC670469 /// LOC676625



|              |         |                                                                                  |               |  |
|--------------|---------|----------------------------------------------------------------------------------|---------------|--|
| 1422716_a_at | 1.04701 | "acid phosphatase 1, soluble"                                                    | Acp1          |  |
| 1422717_at   | 0.84951 | "acid phosphatase 1, soluble"                                                    | Acp1          |  |
| 1422718_at   | 0.88485 | "adaptor-related protein complex 3, sigma 2 subunit"                             | Ap3s2         |  |
| 1422719_s_at | 0.98277 | nucleoporin 50                                                                   | Nup50         |  |
| 1422720_at   | 1.09066 | "ISL1 transcription factor, LIM/homeodomain"                                     | Isl1          |  |
| 1422721_at   | 0.88287 | "tyrosine kinase, non-receptor, 1"                                               | Tnk1          |  |
| 1422722_at   | 1.08770 | RIKEN cDNA 1700001K19 gene                                                       | 1700001K19Rik |  |
| 1422723_at   | 1.07242 | stimulated by retinoic acid gene 6                                               | Stra6         |  |
| 1422724_at   | 0.92193 | male germ cell-associated kinase                                                 | Mak           |  |
| 1422725_at   | 1.00168 | male germ cell-associated kinase                                                 | Mak           |  |
| 1422726_x_at | 1.05289 | spermatogenesis associated glutamate (E)-rich protein 4a                         | Speer4a       |  |
| 1422727_at   | 0.84085 | expressed in non-metastatic cells 5                                              | Nme5          |  |
| 1422728_at   | 0.86276 | inhibin alpha                                                                    | Inha          |  |
| 1422729_at   | 1.08078 | protocadherin beta 10                                                            | Pcdhb10       |  |
| 1422730_at   | 0.88153 | LIM domains containing 1                                                         | Limd1         |  |
| 1422731_at   | 0.84136 | LIM domains containing 1                                                         | Limd1         |  |
| 1422732_at   | 0.94016 | "polymerase (DNA-directed), delta interacting protein 2"                         | Poldip2       |  |
| 1422733_at   | 1.00217 | four jointed box 1 (Drosophila)                                                  | Fjx1          |  |
| 1422734_a_at | 0.96889 | myeloblastosis oncogene                                                          | Myb           |  |
| 1422735_at   | 0.74873 | forkhead box Q1                                                                  | Foxq1         |  |
| 1422736_at   | 0.88636 | RAN binding protein 9                                                            | Ranbp9        |  |
| 1422737_at   | 1.03013 | nuclear receptor coactivator 3                                                   | Ncoa3         |  |
| 1422738_at   | 1.24044 | "discoidin domain receptor family, member 2"                                     | Ddr2          |  |
| 1422739_at   | 0.90288 | Heparan sulfate 2-O-sulfotransferase 1                                           | Hs2st1        |  |
| 1422740_at   | 0.97747 | "tumor necrosis factor receptor superfamily, member 21"                          | Tnfrsf21      |  |
| 1422741_a_at | 0.94644 | bobby sox homolog (Drosophila)                                                   | Bbx           |  |
| 1422742_at   | 1.08579 | human immunodeficiency virus type I enhancer binding protein 1                   | Hivep1        |  |
| 1422743_at   | 1.13211 | phosphorylase kinase alpha 1                                                     | Phka1         |  |
| 1422744_at   | 0.97099 | phosphorylase kinase alpha 1                                                     | Phka1         |  |
| 1422745_at   | 0.91072 | bicaudal D homolog 2 (Drosophila)                                                | Bicd2         |  |
| 1422746_s_at | 1.05194 | bicaudal D homolog 2 (Drosophila)                                                | Bicd2         |  |
| 1422747_at   | 1.01738 | CHK2 checkpoint homolog (S. pombe)                                               | Chek2         |  |
| 1422748_at   | 0.94461 | zinc finger homeobox 1b                                                          | Zfx1b         |  |
| 1422749_at   | 0.95519 | "lymphocyte antigen 6 complex, locus G6C"                                        | Ly6g6c        |  |
| 1422750_a_at | 0.95165 | "zinc finger, MYND domain containing 10"                                         | Zmynd10       |  |
| 1422751_at   | 0.84374 | "transducin-like enhancer of split 1, homolog of Drosophila E(spl)"              | Tle1          |  |
| 1422752_at   | 0.93009 | polymerase (RNA) III (DNA directed) polypeptide K                                | Polr3k        |  |
| 1422753_a_at | 1.05748 | polymerase (RNA) III (DNA directed) polypeptide K                                | Polr3k        |  |
| 1422754_at   | 0.84219 | ---                                                                              | ---           |  |
| 1422755_at   | 0.86715 | Bruton agammaglobulinemia tyrosine kinase                                        | Btk           |  |
| 1422756_at   | 1.08443 | "solute carrier family 32 (GABA vesicular transporter), member 1"                | Slc32a1       |  |
| 1422757_at   | 1.07522 | "solute carrier family 5 (neutral amino acid transporters, system A), member 4b" | Slc5a4b       |  |

1422758\_at 1.00820 carbohydrate sulfotransferase 2 Chst2  
 1422759\_a\_at 0.97176 exportin 6 Xpo6  
 1422760\_at 1.11143 "peptidyl arginine deiminase, type IV /// similar to Protein-arginine deiminase type IV (Peptidylarginine deiminase IV)" Padi4 /// LOC670543  
 1422761\_at 0.90473 transducin (beta)-like 1X-linked receptor 1 Tbl1xr1  
 1422762\_at 0.93667 kinesin family member 17 Kif17  
 1422763\_at 0.99245 "GIPC PDZ domain containing family, member 1" Gipc1  
 1422764\_at 1.03032 "microtubule-associated protein, RP/EB family, member 1" Mapre1  
 1422765\_at 0.94713 "microtubule-associated protein, RP/EB family, member 1" Mapre1  
 1422766\_at 0.97427 staufen (RNA binding protein) homolog 1 (Drosophila) Stau1  
 1422767\_at 1.07141 bystin-like Bysl  
 1422768\_at 0.99051 "synaptotagmin binding, cytoplasmic RNA interacting protein" Syncrip  
 1422769\_at 1.03680 "synaptotagmin binding, cytoplasmic RNA interacting protein" Syncrip  
 1422770\_at 1.06693 RAD51-like 3 (S. cerevisiae) Rad51l3  
 1422771\_at 0.67822 similar to Mothers against decapentaplegic homolog 6 (SMAD 6) (Mothers against DPP homolog 6) (Smad6) (Mad homolog 7) LOC670044  
 1422772\_at 0.93465 "core 1 UDP-galactose:N-acetylgalactosamine-alpha-R beta 1,3-galactosyltransferase" C1galt1  
 1422773\_at 0.89436 myelin transcription factor 1 Myt1  
 1422774\_at 0.75676 RIKEN cDNA 1700088E04 gene 1700088E04Rik  
 1422775\_at 0.88215 B lymphoid kinase Blk  
 1422776\_at 0.93530 "serine (or cysteine) peptdiase inhibitor, clade B, member 8" Serpinb8  
 1422777\_at 0.94838 "complement component 1, q subcomponent-like 1" C1ql1  
 1422778\_at 1.06020 "TAF9 RNA polymerase II, TATA box binding protein (TBP)-associated factor" Taf9  
 1422779\_at 0.98362 "sphingomyelin phosphodiesterase 3, neutral" Smpd3  
 1422780\_at 1.01140 peroxisomal membrane protein 4 Pxmp4  
 1422781\_at 0.98814 toll-like receptor 3 Tlr3  
 1422782\_s\_at 0.92477 toll-like receptor 3 Tlr3  
 1422783\_a\_at 0.93198 keratin 6A Krt6a  
 1422784\_at 0.93295 keratin 6A Krt6a  
 1422785\_at 1.19080 RAS p21 protein activator 2 Rasa2  
 1422786\_at 1.10714 "solute carrier family 30 (zinc transporter), member 1" Slc30a1  
 1422787\_at 0.98192 FK506 binding protein-like Fkbpl  
 1422788\_at 1.10546 "solute carrier family 43, member 3" Slc43a3  
 1422789\_at 0.95671 "aldehyde dehydrogenase family 1, subfamily A2" Aldh1a2  
 1422790\_at 0.95565 natriuretic peptide precursor type C Nppc  
 1422791\_at 1.10896 "platelet-activating factor acetylhydrolase, isoform 1b, alpha2 subunit" Pafah1b2  
 1422792\_at 1.04317 "platelet-activating factor acetylhydrolase, isoform 1b, alpha2 subunit" Pafah1b2  
 1422793\_at 0.97416 "platelet-activating factor acetylhydrolase, isoform 1b, alpha2 subunit" Pafah1b2

|              |         |                                                                          |           |              |
|--------------|---------|--------------------------------------------------------------------------|-----------|--------------|
| 1422794_at   | 0.98327 | cullin 3                                                                 | Cul3      |              |
| 1422795_at   | 0.86503 | cullin 3                                                                 | Cul3      |              |
| 1422796_at   | 1.10517 | prolyl endopeptidase                                                     | Prep      |              |
| 1422797_at   | 1.05939 | mitogen activated protein binding protein interacting protein            | Mapbpip   |              |
| 1422798_at   | 1.16706 | contactin associated protein-like 2                                      | Cntnap2   |              |
| 1422799_at   | 0.97360 | HLA-B associated transcript 2                                            | Bat2      |              |
| 1422800_at   | 0.86364 | HLA-B associated transcript 2                                            | Bat2      |              |
| 1422801_at   | 1.10053 | Ras-GTPase-activating protein SH3-domain binding protein                 |           | RP23-336J1.4 |
| 1422802_at   | 1.02836 | defensin related cryptdin 3                                              | Defcr3    |              |
| 1422803_at   | 0.75644 | follistatin-like 3                                                       | Fstl3     |              |
| 1422804_at   | 1.08989 | "serine (or cysteine) peptidase inhibitor, clade B, member 6b"           | Serpinb6b |              |
| 1422805_a_at | 0.88283 | "inhibitor of growth family, member 3"                                   | Ing3      |              |
| 1422806_x_at | 0.85080 | "inhibitor of growth family, member 3"                                   | Ing3      |              |
| 1422807_at   | 0.91066 | ADP-ribosylation factor 5                                                | Arf5      |              |
| 1422808_s_at | 0.89491 | dedicator of cyto-kinesis 2                                              | Dock2     |              |
| 1422809_at   | 0.98234 | regulating synaptic membrane exocytosis 2                                | Rims2     |              |
| 1422810_at   | 0.76683 | zinc finger protein 191                                                  | Zfp191    |              |
| 1422811_at   | 0.98548 | "solute carrier family 27 (fatty acid transporter), member 1"            | Slc27a1   |              |
| 1422812_at   | 1.02472 | chemokine (C-X-C motif) receptor 6                                       | Cxcr6     |              |
| 1422813_at   | 1.01748 | "calcium channel, voltage-dependent, gamma subunit 1"                    | Cacng1    |              |
| 1422814_at   | 1.03982 | "asp (abnormal spindle)-like, microcephaly associated (Drosophila)"      | Aspm      |              |
| 1422815_at   | 0.97607 | complement component 9                                                   | C9        |              |
| 1422816_a_at | 1.00355 | mutY homolog (E. coli)                                                   | Mutyh     |              |
| 1422817_at   | 0.98851 | glycoprotein 5 (platelet)                                                | Gp5       |              |
| 1422818_at   | 0.84361 | "neural precursor cell expressed, developmentally down-regulated gene 9" | Nedd9     |              |
| 1422819_at   | 0.97965 | mitochondrial ribosomal protein L36                                      | Mrpl36    |              |
| 1422820_at   | 0.85568 | "lipase, hormone sensitive"                                              | Lipe      |              |
| 1422821_s_at | 0.94109 | StAR-related lipid transfer (START) domain containing 5                  | Stard5    |              |
| 1422822_at   | 0.95583 | StAR-related lipid transfer (START) domain containing 5                  | Stard5    |              |
| 1422823_at   | 1.30166 | epidermal growth factor receptor pathway substrate 8                     | Eps8      |              |
| 1422824_s_at | 1.31315 | epidermal growth factor receptor pathway substrate 8                     | Eps8      |              |
| 1422825_at   | 0.91958 | cocaine and amphetamine regulated transcript                             | Cart      |              |
| 1422826_at   | 1.02405 | "insulin-like growth factor binding protein, acid labile subunit"        | Igfals    |              |
| 1422827_x_at | 0.93208 | "solute carrier family 35 (UDP-galactose transporter), member 2"         |           | Slc35a2      |
| 1422828_at   | 0.90247 | "CD3 antigen, delta polypeptide"                                         | Cd3d      |              |
| 1422829_at   | 0.99984 | dopamine receptor 4                                                      | Drd4      |              |
| 1422830_s_at | 0.97789 | dopamine receptor 4                                                      | Drd4      |              |
| 1422831_at   | 1.03490 | fibrillin 2 /// similar to fibrillin 2                                   | Fbn2 ///  | LOC639042    |
| 1422832_at   | 0.96679 | retinal G protein coupled receptor                                       | Rgr       |              |
| 1422833_at   | 0.80633 | forkhead box A2                                                          | Foxa2     |              |
| 1422834_at   | 0.92866 | "potassium voltage-gated channel, Shal-related family, member 2"         |           | Kcnd2        |
| 1422835_at   | 1.00976 | "potassium voltage-gated channel, Shal-related family, member 2"         |           | Kcnd2        |

1422836\_at 0.89999 muscleblind-like 3 (Drosophila) Mbnl3  
1422837\_at 1.06894 sciellin Scel  
1422838\_at 0.94194 "potassium channel, subfamily U, member 1" Kcnu1  
1422839\_at 0.96931 neurogenin 2 Neurog2  
1422840\_at 1.05034 RIKEN cDNA 1700013N18 gene 1700013N18Rik  
1422841\_at 0.92162 "1-acylglycerol-3-phosphate O-acyltransferase 6 (lysophosphatidic acid acyltransferase, zeta)" Agpat6  
1422842\_at 1.14455 5'-3' exoribonuclease 2 Xrn2  
1422843\_at 1.09309 --- ---  
1422844\_a\_at 1.03901 WD repeat domain 77 Wdr77  
1422845\_at 0.98531 calnexin Canx  
1422846\_at 1.02875 "retinol binding protein 2, cellular" Rbp2  
1422847\_a\_at 0.93359 "protein kinase C, delta" Prkcd  
1422848\_a\_at 1.12178 "poly(A) binding protein, nuclear 1" Pabpn1  
1422849\_a\_at 1.02270 "poly(A) binding protein, nuclear 1" Pabpn1  
1422850\_at 1.23947 "poly(A) binding protein, nuclear 1" Pabpn1  
1422851\_at 1.16590 high mobility group AT-hook 2 Hmga2  
1422852\_at 0.71761 calcium and integrin binding family member 2 Cib2  
1422853\_at 0.99805 src homology 2 domain-containing transforming protein C1 Shc1  
1422854\_at 1.02686 src homology 2 domain-containing transforming protein C1 Shc1  
1422855\_at 1.06746 cleavage and polyadenylation specificity factor 3 Cpsf3  
1422856\_at 0.73703 "solute carrier family 12, member 3" Slc12a3  
1422857\_at 1.05202 thyroid hormone receptor interactor 4 Trip4  
1422858\_at 0.95343 thyroid hormone receptor interactor 4 Trip4  
1422859\_a\_at 1.27977 ribosomal protein L23 Rpl23  
1422860\_at 0.93075 neurotensin Nts  
1422861\_s\_at 0.85872 similar to PDZ and LIM domain protein 5 (Enigma homolog) (Enigma-like PDZ and LIM domains protein) LOC669660  
1422862\_at 0.75626 similar to PDZ and LIM domain protein 5 (Enigma homolog) (Enigma-like PDZ and LIM domains protein) LOC669660  
1422863\_s\_at 0.78268 similar to PDZ and LIM domain protein 5 (Enigma homolog) (Enigma-like PDZ and LIM domains protein) LOC669660  
1422864\_at 1.05777 runt related transcription factor 1 Runx1  
1422865\_at 1.33967 runt related transcription factor 1 Runx1  
1422866\_at 0.97547 "procollagen, type XIII, alpha 1" Col13a1  
1422867\_at 1.11140 granzyme G Gzmg  
1422868\_s\_at 1.00140 guanine deaminase Gda  
1422869\_at 0.95235 c-mer proto-oncogene tyrosine kinase Mertk  
1422870\_at 1.00867 homeo box C4 Hoxc4  
1422871\_at 0.99147 "potassium inwardly-rectifying channel, subfamily J, member 12" Kcnj12  
1422872\_at 0.91876 "bone morphogenetic protein receptor, type 1B" Bmpr1b  
1422873\_at 0.96219 "proteoglycan 2, bone marrow" Prg2  
1422874\_at 0.90153 proacrosin binding protein Acrbp

|              |         |                                                                          |         |           |
|--------------|---------|--------------------------------------------------------------------------|---------|-----------|
| 1422875_at   | 1.01147 | CD84 antigen                                                             | Cd84    |           |
| 1422876_at   | 1.02142 | calpain 9 (nCL-4) /// similar to calpain 9 (nCL-4)                       | Capn9   | LOC639715 |
| 1422877_at   | 0.93691 | protocadherin beta 12                                                    | Pcdhb12 |           |
| 1422878_at   | 0.93643 | synaptotagmin XII                                                        | Syt12   |           |
| 1422879_at   | 0.94720 | synaptophysin-like protein                                               | Sypl    |           |
| 1422880_at   | 0.99654 | synaptophysin-like protein                                               | Sypl    |           |
| 1422881_s_at | 0.98356 | synaptophysin-like protein                                               | Sypl    |           |
| 1422882_at   | 0.91969 | synaptophysin-like protein                                               | Sypl    |           |
| 1422883_at   | 0.95513 | ubiquitin specific peptidase 8                                           | Usp8    |           |
| 1422884_at   | 1.16711 | small nuclear ribonucleoprotein D3                                       | Snrpd3  |           |
| 1422885_at   | 1.09468 | small nuclear ribonucleoprotein D3                                       | Snrpd3  |           |
| 1422886_a_at | 0.99917 | CDC like kinase 4                                                        | Clk4    |           |
| 1422887_a_at | 0.91881 | C-terminal binding protein 2                                             | Ctbp2   |           |
| 1422888_at   | 0.92686 | ring finger protein 5                                                    | Rnf5    |           |
| 1422889_at   | 0.77761 | protocadherin 18                                                         | Pcdh18  |           |
| 1422890_at   | 0.76008 | protocadherin 18                                                         | Pcdh18  |           |
| 1422891_at   | 0.96701 | "histocompatibility 2, class II antigen E alpha"                         | H2-Ea   |           |
| 1422892_s_at | 1.06112 | "histocompatibility 2, class II antigen E alpha"                         | H2-Ea   |           |
| 1422893_at   | 0.85394 | Scm-like with four mbt domains 1                                         | Sfmbt1  |           |
| 1422894_at   | 0.91120 | Scm-like with four mbt domains 1                                         | Sfmbt1  |           |
| 1422895_at   | 0.98456 | vesicle-associated membrane protein 4                                    | Vamp4   |           |
| 1422896_at   | 1.10956 | ---                                                                      | ---     |           |
| 1422897_at   | 0.97265 | "solute carrier family 22 (organic anion/cation transporter), member 12" |         |           |
| Slc22a12     |         |                                                                          |         |           |
| 1422898_s_at | 0.77040 | "solute carrier family 22 (organic anion/cation transporter), member 12" |         |           |
| Slc22a12     |         |                                                                          |         |           |
| 1422899_at   | 0.90216 | "solute carrier family 6 (neurotransmitter transporter), member 20"      | Slc6a20 |           |
| 1422900_at   | 0.94486 | meningioma expressed antigen 5 (hyaluronidase)                           | Mgea5   |           |
| 1422901_at   | 0.92397 | meningioma expressed antigen 5 (hyaluronidase)                           | Mgea5   |           |
| 1422902_s_at | 0.95331 | meningioma expressed antigen 5 (hyaluronidase)                           | Mgea5   |           |
| 1422903_at   | 1.10064 | lymphocyte antigen 86                                                    | Ly86    |           |
| 1422904_at   | 0.90174 | flavin containing monooxygenase 2                                        | Fmo2    |           |
| 1422905_s_at | 1.00506 | flavin containing monooxygenase 2                                        | Fmo2    |           |
| 1422906_at   | 0.82496 | "ATP-binding cassette, sub-family G (WHITE), member 2"                   | Abcg2   |           |
| 1422907_at   | 0.94940 | "guanine nucleotide binding protein, alpha transducing 2"                | Gnat2   |           |
| 1422908_at   | 0.96804 | "ATPase, (Na+)/K+ transporting, beta 4 polypeptide"                      | Atp1b4  |           |
| 1422909_at   | 1.13598 | structural maintenance of chromosomes 6                                  | Smc6    |           |
| 1422910_s_at | 0.93766 | structural maintenance of chromosomes 6                                  | Smc6    |           |
| 1422911_at   | 0.89872 | cerebellin 3 precursor protein                                           | Cbln3   |           |
| 1422912_at   | 1.10765 | bone morphogenetic protein 4                                             | Bmp4    |           |
| 1422913_at   | 1.02451 | protamine 3                                                              | Prm3    |           |
| 1422914_at   | 0.95502 | trans-acting transcription factor 5                                      | Sp5     |           |
| 1422915_at   | 1.09704 | gastrin                                                                  | Gast    |           |

1422916\_at 0.96547 fibroblast growth factor 21 Fgf21  
1422917\_at 0.89612 Eph receptor A1 EphA1  
1422918\_at 0.93986 RIKEN cDNA 1810009J06 gene 1810009J06Rik  
1422919\_at 0.84021 HRAS-like suppressor Hrasls  
1422920\_at 0.96364 claudin 13 Cldn13  
1422921\_at 0.89655 pre-B lymphocyte gene 3 Vpreb3  
1422922\_at 1.12410 RecQ protein-like 4 Recql4  
1422923\_at 0.99613 fibroblast growth factor 3 Fgf3  
1422924\_at 1.53340 "tumor necrosis factor (ligand) superfamily, member 9" Tnfsf9  
1422925\_s\_at 1.06013 acyl-CoA thioesterase 3 Acot3  
1422926\_at 1.15268 melanocortin 2 receptor Mc2r  
1422927\_at 0.99124 "Yip1 domain family, member 7" Yipf7  
1422928\_at 0.95424 "elastase 2, neutrophil" Ela2  
1422929\_s\_at 0.97741 atonal homolog 7 (Drosophila) Atoh7  
1422930\_at 0.85792 "intercellular adhesion molecule 4, Landsteiner-Wiener blood group" Icam4  
1422931\_at 1.13149 fos-like antigen 2 Fosl2  
1422932\_a\_at 0.91997 vav 1 oncogene Vav1  
1422933\_at 0.90239 X-linked lymphocyte-regulated 5D /// similar to X-linked lymphocyte-regulated 5C Xlr5d /// LOC627081  
1422934\_x\_at 1.08154 "defensin related cryptdin, related sequence 7" Defcr-rs7  
1422935\_x\_at 1.02131 chromobox homolog 1 (Drosophila HP1 beta) Cbx1  
1422936\_at 0.95156 MAS1 oncogene Mas1  
1422937\_at 0.91805 frizzled homolog 5 (Drosophila) Fzd5  
1422938\_at 0.88842 B-cell leukemia/lymphoma 2 Bcl2  
1422939\_at 0.98373 "serine (or cysteine) peptidase inhibitor, clade B (ovalbumin), member 3B" Serpinb3b  
1422940\_x\_at 1.12278 "serine (or cysteine) peptidase inhibitor, clade B (ovalbumin), member 3B" Serpinb3b  
1422941\_at 1.03273 wingless-related MMTV integration site 16 Wnt16  
1422942\_at 0.94599 galanin receptor 2 Galr2  
1422943\_a\_at 0.69132 heat shock protein 1 Hspb1  
1422944\_a\_at 1.09314 diaphanous homolog 3 (Drosophila) Diap3  
1422945\_a\_at 0.95361 kinesin family member 5C Kif5c  
1422946\_a\_at 0.96493 DNA methyltransferase (cytosine-5) 1 Dnmt1  
1422947\_at 1.07801 "histone 2, H4 /// histone 1, H4f /// histone 1, H4m /// histone 1, H4a /// histone 1, H4b" Hist2h4 /// Hist1h4f /// Hist1h4m /// Hist1h4a /// Hist1h4b  
1422948\_s\_at 1.13518 "histone 1, H4h /// histone 2, H4 /// histone 1, H4c /// histone 1, H4i /// histone 1, H4j /// histone 1, H4k /// histone 1, H4m /// histone 1, H4a /// histone 1, H4b" Hist1h4h /// Hist2h4 /// Hist1h4c /// Hist1h4i /// Hist1h4j /// Hist1h4k /// Hist1h4m /// Hist1h4a /// Hist1h4b  
1422949\_at 1.01379 "nitric oxide synthase 1, neuronal" Nos1  
1422950\_at 0.96545 hairy and enhancer of split 7 (Drosophila) Hes7  
1422951\_at 0.86517 protocadherin beta 4 Pcdhb4  
1422952\_at 1.03452 Ng23 protein Ng23

1422953\_at 1.08069 "formyl peptide receptor, related sequence 2" Fpr-rs2  
1422954\_at 0.91014 zinc finger protein 60 Zfp60  
1422955\_at 1.04232 synaptotagmin XVII Syt17  
1422956\_at 1.01238 "DNA segment, Chr 1, Pasteur Institute 1" D1Pas1  
1422957\_at 1.02527 chemokine (C-C motif) receptor 3 Ccr3  
1422958\_at 0.96247 keratin associated protein 5-4 Krtap5-4  
1422959\_s\_at 0.88710 zinc finger protein 313 Zfp313  
1422960\_at 0.92074 steroid 5 alpha-reductase 2 Srd5a2  
1422961\_at 1.08446 N-acetyltransferase 3 Nat3  
1422962\_a\_at 1.48513 "proteasome (prosome, macropain) subunit, beta type 8 (large multifunctional peptidase 7)" Psm8  
1422963\_at 0.91164 small proline-rich protein 2I Sprr2i  
1422964\_at 1.04236 RAD23a homolog (S. cerevisiae) Rad23a  
1422965\_at 0.96348 "angiotensin II, type I receptor-associated protein" Agrap  
1422966\_a\_at 1.02573 transferrin receptor Tfrc  
1422967\_a\_at 1.04450 transferrin receptor Tfrc  
1422968\_at 0.81814 inositol hexaphosphate kinase 1 Ihpk1  
1422969\_s\_at 0.92717 inositol hexaphosphate kinase 1 Ihpk1  
1422970\_at 0.84110 Max dimerization protein 3 Mxd3  
1422971\_at 1.06206 GCN5 general control of amino acid synthesis-like 2 (yeast) Gcn512  
1422972\_s\_at 1.15768 GCN5 general control of amino acid synthesis-like 2 (yeast) Gcn512  
1422973\_a\_at 1.04652 thyroid hormone responsive SPOT14 homolog (Rattus) Thrsp  
1422974\_at 0.82335 "5' nucleotidase, ecto" Nt5e  
1422975\_at 1.07077 membrane metallo endopeptidase Mme  
1422976\_x\_at 1.00168 "NADH dehydrogenase (ubiquinone) 1 alpha subcomplex, 7 (B14.5a)" Ndufa7  
1422977\_at 0.98447 "glycoprotein Ib, beta polypeptide" Gp1bb  
1422978\_at 1.10553 "cytochrome b-245, beta polypeptide" Cybb  
1422979\_at 1.06284 suppressor of variegation 3-9 homolog 2 (Drosophila) Suv39h2  
1422980\_a\_at 0.99771 blocked early in transport 1 homolog (S. cerevisiae)-like Bet11  
1422981\_at 0.95417 DiGeorge syndrome critical region gene 8 Dgcr8  
1422982\_at 1.01361 androgen receptor Ar  
1422983\_at 0.89364 integrin beta 6 Itgb6  
1422984\_at 1.13460 cytoplasmic linker 2 Cyln2  
1422985\_at 0.96733 frizzled homolog 1 (Drosophila) Fzd1  
1422986\_at 1.05748 "estrogen related receptor, beta" Esrrb  
1422987\_at 1.01665 netrin 1 Ntn1  
1422988\_at 1.09103 N-sulfoglucosamine sulfohydrolase (sulfamidase) Sgsh  
1422989\_a\_at 0.93121 dystrophin myotonic-protein kinase Dmpk  
1422990\_at 1.09576 met proto-oncogene Met  
1422991\_at 1.02316 phosphatidylinositol 3-kinase catalytic delta polypeptide Pik3cd  
1422992\_s\_at 1.08586 phosphatidylinositol 3-kinase catalytic delta polypeptide Pik3cd  
1422993\_s\_at 1.08660 THO complex 4 /// RNA and export factor binding protein 2 Thoc4 ///

## Refbp2

|              |         |                                                                                                                                                                     |                   |
|--------------|---------|---------------------------------------------------------------------------------------------------------------------------------------------------------------------|-------------------|
| 1422994_at   | 0.99261 | "phosphatidylinositol-3-phosphate/phosphatidylinositol 5-kinase, type III"                                                                                          |                   |
| Pip5k3       |         |                                                                                                                                                                     |                   |
| 1422995_at   | 0.80169 | Bcl2 modifying factor                                                                                                                                               | Bmf               |
| 1422996_at   | 1.02003 | acyl-CoA thioesterase 2                                                                                                                                             | Acot2             |
| 1422997_s_at | 0.89538 | acyl-CoA thioesterase 1 /// acyl-CoA thioesterase 2                                                                                                                 | Acot1 /// Acot2   |
| 1422998_a_at | 0.92776 | glutaredoxin 2 (thioltransferase)                                                                                                                                   | Glx2              |
| 1422999_at   | 1.01972 | mitogen-activated protein kinase kinase kinase 14                                                                                                                   | Map3k14           |
| 1423000_a_at | 0.87422 | "diacylglycerol kinase, epsilon"                                                                                                                                    | Dgke              |
| 1423001_at   | 0.92104 | "sprouty-related, EVH1 domain containing 2"                                                                                                                         | Spred2            |
| 1423002_at   | 0.93589 | phosphoprotein associated with glycosphingolipid microdomains 1                                                                                                     | Pag1              |
| 1423003_at   | 0.92204 | SET domain containing (lysine methyltransferase) 7                                                                                                                  | Setd7             |
| 1423004_at   | 0.91121 | vasoactive intestinal peptide receptor 1                                                                                                                            | Vipr1             |
| 1423005_a_at | 0.97187 | espin                                                                                                                                                               | Espn              |
| 1423006_at   | 1.03875 | proviral integration site 1                                                                                                                                         | Pim1              |
| 1423007_a_at | 0.93379 | glial cell line derived neurotrophic factor family receptor alpha 2                                                                                                 | Gfra2             |
| 1423008_at   | 1.00094 | ADP-ribosyltransferase 2a                                                                                                                                           | Art2a             |
| 1423009_at   | 1.07491 | secretory blood group 1                                                                                                                                             | Sec1              |
| 1423010_at   | 1.00377 | sacsin                                                                                                                                                              | Sacs              |
| 1423011_at   | 0.91845 | ecotropic viral integration site 1                                                                                                                                  | Evi1              |
| 1423012_at   | 0.97482 | synaptotagmin VII                                                                                                                                                   | Syt7              |
| 1423013_at   | 0.83345 | forkhead box F1a                                                                                                                                                    | Foxf1a            |
| 1423014_at   | 1.11165 | protocadherin beta 6                                                                                                                                                | Pcdhb6            |
| 1423015_at   | 0.91878 | kin of IRRE like 1 (Drosophila)                                                                                                                                     | Kirrel1           |
| 1423016_a_at | 0.84172 | glycophorin A                                                                                                                                                       | Gypa              |
| 1423017_a_at | 1.07801 | interleukin 1 receptor antagonist                                                                                                                                   | Il1rn             |
| 1423018_at   | 0.91978 | "potassium voltage-gated channel, shaker-related subfamily, member 3"                                                                                               | Kcna3             |
| 1423019_at   | 1.03689 | gap junction membrane channel protein alpha 9                                                                                                                       | Gja9              |
| 1423020_at   | 0.83858 | ---                                                                                                                                                                 | ---               |
| 1423021_s_at | 0.98498 | insulin-like 3 /// Janus kinase 3                                                                                                                                   | Insl3 /// Jak3    |
| 1423022_at   | 1.05532 | "adrenergic receptor, alpha 2a"                                                                                                                                     | Adra2a            |
| 1423023_at   | 0.98858 | secreted frizzled-related sequence protein 5                                                                                                                        | Sfrp5             |
| 1423024_at   | 0.79036 | SH2 domain protein 1B1                                                                                                                                              | Sh2d1b1           |
| 1423025_a_at | 0.89398 | schwannomin interacting protein 1                                                                                                                                   | Schip1            |
| 1423026_at   | 0.83060 | Rad51 homolog c (S. cerevisiae)                                                                                                                                     | Rad51c            |
| 1423027_at   | 1.19049 | forkhead box L1                                                                                                                                                     | Foxl1             |
| 1423028_at   | 0.89132 | interferon alpha 2                                                                                                                                                  | Ifna2             |
| 1423029_at   | 0.90686 | hairy and enhancer of split 2 (Drosophila)                                                                                                                          | Hes2              |
| 1423030_at   | 1.11507 | valosin containing protein /// similar to Transitional endoplasmic reticulum ATPase (TER ATPase) (15S Mg(2+)-ATPase p97 subunit) (Valosin-containing protein) (VCP) | Vcp /// LOC675857 |
| 1423031_at   | 0.95649 | macrophage erythroblast attacher                                                                                                                                    | Maea              |
| 1423032_at   | 1.06671 | ribosomal protein L39                                                                                                                                               | Rpl39             |



1423033\_at 1.04215 "STT3, subunit of the oligosaccharyltransferase complex, homolog A (S. cerevisiae)" Stt3a

1423034\_at 1.07116 thioredoxin-like 5 Txnl5

1423035\_s\_at 1.11030 thioredoxin-like 5 Txnl5

1423036\_at 0.87229 thioredoxin-like 5 Txnl5

1423037\_at 0.96019 angiotensin receptor-like 1 Agtrl1

1423038\_at 0.98223 syntaxin 6 Stx6

1423039\_a\_at 0.95984 --- ---

1423040\_at 1.13482 basic leucine zipper and W2 domains 1 Bzw1

1423041\_a\_at 1.05545 basic leucine zipper and W2 domains 1 Bzw1

1423042\_at 1.00706 "DEAD/H (Asp-Glu-Ala-Asp/His) box polypeptide 3, X-linked" Ddx3x

1423043\_s\_at 1.01525 "DEAD/H (Asp-Glu-Ala-Asp/His) box polypeptide 3, X-linked" Ddx3x

1423044\_at 1.01455 proline synthetase co-transcribed Prosc

1423045\_at 0.95862 nuclear cap binding protein subunit 2 Ncbp2

1423046\_s\_at 0.87246 nuclear cap binding protein subunit 2 Ncbp2

1423047\_at 1.00138 toll interacting protein Tollip

1423048\_a\_at 0.84967 toll interacting protein Tollip

1423049\_a\_at 0.92873 "tropomyosin 1, alpha" Tpm1

1423050\_s\_at 0.95211 heterogeneous nuclear ribonucleoprotein U Hnrpu

1423051\_at 1.13762 heterogeneous nuclear ribonucleoprotein U Hnrpu

1423052\_at 0.98138 ADP-ribosylation factor 4 Arf4

1423053\_at 0.92038 ADP-ribosylation factor 4 Arf4

1423054\_at 0.96726 WD repeat domain 1 Wdr1

1423055\_at 0.92580 neuron specific gene family member 1 Nsg1

1423056\_at 0.98407 neuron specific gene family member 1 Nsg1

1423057\_at 1.01135 "capping protein (actin filament) muscle Z-line, alpha 2" Capza2

1423058\_at 1.07045 "capping protein (actin filament) muscle Z-line, alpha 2" Capza2

1423059\_at 1.03853 PTK2 protein tyrosine kinase 2 Ptk2

1423060\_at 1.15671 proliferation-associated 2G4 Pa2g4

1423061\_at 0.81342 armadillo repeat gene deleted in velo-cardio-facial syndrome Arvcf

1423062\_at 0.99824 insulin-like growth factor binding protein 3 Igfbp3

1423063\_at 0.74538 DNA methyltransferase 3A Dnmt3a

1423064\_at 0.98785 DNA methyltransferase 3A Dnmt3a

1423065\_at 0.62061 DNA methyltransferase 3A Dnmt3a

1423066\_at 0.87415 DNA methyltransferase 3A Dnmt3a

1423067\_at 0.95037 CDK5 regulatory subunit associated protein 3 Cdk5rap3

1423068\_at 0.74841 intraflagellar transport 172 homolog (Chlamydomonas) Ift172

1423069\_at 0.89451 activity-dependent neuroprotective protein Adnp

1423070\_at 0.91802 ribosomal protein L21 Rpl21

1423071\_x\_at 0.79828 hypothetical gene supported by BC019681; BC027236 /// hypothetical LOC434328 /// hypothetical LOC544983 /// hypothetical LOC545175 /// hypothetical LOC619711 /// hypothetical LOC622782 /// hypothetical protein LOC623857 /// hypothetical LOC624831 /// hypothetical protein LOC665837 /// hypothetical protein LOC666017 /// hypothetical protein

LOC666200 /// hypothetical protein LOC666464 /// hypothetical protein LOC668524 /// hypothetical protein LOC670117 /// hypothetical protein LOC670242 LOC270335 /// LOC434328 /// LOC544983 /// LOC545175 /// LOC619711 /// LOC622782 /// LOC623857 /// LOC624831 /// LOC665837 /// LOC666017 /// LOC666200 /// LOC666464 /// LOC668524 /// LOC670117 /// LOC670242  
 1423072\_at 0.80948 RIKEN cDNA 6720475J19 gene /// similar to putative retrovirus-related gag protein 6720475J19Rik /// LOC670480  
 1423073\_at 0.92812 cytidylate kinase Cmpk  
 1423074\_at 0.80108 "lectin, mannose-binding 2" Lman2  
 1423075\_at 0.80541 "lectin, mannose-binding 2" Lman2  
 1423076\_at 1.00038 --- ---  
 1423077\_at 0.98966 sorting nexin 9 Snx9  
 1423078\_a\_at 1.57335 sterol-C4-methyl oxidase-like Sc4mol  
 1423079\_a\_at 1.10249 translocase of outer mitochondrial membrane 20 homolog (yeast) /// similar to translocase of outer mitochondrial membrane 20 homolog /// similar to translocase of outer mitochondrial membrane 20 homolog Tomm20 /// LOC546321 /// LOC673774  
 1423080\_at 1.13826 translocase of outer mitochondrial membrane 20 homolog (yeast) Tomm20  
 1423081\_a\_at 1.00563 translocase of outer mitochondrial membrane 20 homolog (yeast) Tomm20  
 1423082\_at 0.88221 "Der1-like domain family, member 1" Der1  
 1423083\_at 0.84246 "RAB33B, member of RAS oncogene family" Rab33b  
 1423084\_at 1.04577 "UDP-Gal:betaGlcNAc beta 1,3-galactosyltransferase, polypeptide 2" B3galt2  
 1423085\_at 0.86435 ephrin B3 Efnb3  
 1423086\_at 1.08057 Niemann Pick type C1 Npc1  
 1423087\_a\_at 1.09056 RIKEN cDNA 1110002E23 gene 1110002E23Rik  
 1423088\_at 0.89639 tropomodulin 3 Tmod3  
 1423089\_at 0.96552 tropomodulin 3 Tmod3  
 1423090\_x\_at 1.03875 "SEC61, gamma subunit" Sec61g  
 1423091\_a\_at 1.00602 glycoprotein m6b Gpm6b  
 1423092\_at 1.07117 inner centromere protein Incenp  
 1423093\_at 0.96387 inner centromere protein Incenp  
 1423094\_at 0.92392 cereblon Crbn  
 1423095\_s\_at 0.90265 cereblon Crbn  
 1423096\_at 1.00200 calpain 7 Capn7  
 1423097\_s\_at 1.01121 calpain 7 Capn7  
 1423098\_at 0.95943 calpain 7 Capn7  
 1423099\_a\_at 0.94531 methyltransferase-like 3 Mettl3  
 1423100\_at 0.43932 FBJ osteosarcoma oncogene Fos  
 1423101\_at 0.77203 progesterin and adipoQ receptor family member IV Paqr4  
 1423102\_a\_at 0.94723 ring finger protein 10 Rnf10  
 1423103\_at 0.97168 "regulatory factor X, 5 (influences HLA class II expression)" Rfx5  
 1423104\_at 0.76445 insulin receptor substrate 1 Irs1  
 1423105\_a\_at 0.96633 YEATS domain containing 4 Yeats4

1423106\_at 0.87717 "ubiquitin-conjugating enzyme E2B, RAD6 homology (S. cerevisiae)" Ube2b  
 1423107\_at 1.03716 "ubiquitin-conjugating enzyme E2B, RAD6 homology (S. cerevisiae)" Ube2b  
 1423108\_at 1.03442 "solute carrier family 25 (mitochondrial carnitine/acylcarnitine translocase), member 20" Slc25a20  
 1423109\_s\_at 0.98388 "solute carrier family 25 (mitochondrial carnitine/acylcarnitine translocase), member 20" Slc25a20  
 1423110\_at 1.02728 "procollagen, type I, alpha 2" Col1a2  
 1423111\_at 0.95663 "ATP synthase, H<sup>+</sup> transporting, mitochondrial F1 complex, alpha subunit, isoform 1" Atp5a1  
 1423112\_at 0.84967 "ubiquitin-conjugating enzyme E2D 3 (UBC4/5 homolog, yeast)" Ube2d3  
 1423113\_a\_at 1.01554 "ubiquitin-conjugating enzyme E2D 3 (UBC4/5 homolog, yeast)" Ube2d3  
 1423114\_at 0.85573 "ubiquitin-conjugating enzyme E2D 3 (UBC4/5 homolog, yeast)" Ube2d3  
 1423115\_at 0.82406 "ST6 (alpha-N-acetyl-neuraminy-2,3-beta-galactosyl-1,3)-N-acetylgalactosaminide alpha-2,6-sialyltransferase 6" St6galnac6  
 1423116\_at 1.02154 DOM-3 homolog Z (C. elegans) Dom3z  
 1423117\_at 1.07224 pumilio 1 (Drosophila) Pum1  
 1423118\_at 1.06094 RIKEN cDNA 1200014J11 gene 1200014J11Rik  
 1423119\_at 0.89115 radial spokehead-like 2A Rshl2a  
 1423120\_at 1.13448 insulin degrading enzyme Ide  
 1423121\_at 1.02598 insulin degrading enzyme Ide  
 1423122\_at 1.19784 arginine vasopressin-induced 1 Avp1  
 1423123\_at 0.95965 RAD54 like (S. cerevisiae) Rad54l  
 1423124\_x\_at 0.76271 RAD54 like (S. cerevisiae) Rad54l  
 1423125\_at 0.98201 doublecortin and calcium/calmodulin-dependent protein kinase-like 1 Dcamk1l  
 1423126\_at 0.94489 "ATPase, Na<sup>+</sup>/K<sup>+</sup> transporting, beta 3 polypeptide" Atp1b3  
 1423127\_at 1.06988 inositol (myo)-1(or 4)-monophosphatase 1 Imp1  
 1423128\_at 1.06351 aryl-hydrocarbon receptor-interacting protein Aip  
 1423129\_at 0.99131 soc-2 (suppressor of clear) homolog (C. elegans) Shoc2  
 1423130\_a\_at 0.98450 "splicing factor, arginine/serine-rich 5 (SRp40, HRS) /// similar to Splicing factor, arginine/serine-rich 5 (Pre-mRNA splicing factor SRP40) (Insulin-induced growth response protein CL-4) (Delayed-early protein HRS)" Sfrs5 /// LOC622469  
 1423131\_at 0.99695 similar to TGF beta-inducible nuclear protein 1 (L-name-related protein 42) (LNR42) LOC433230  
 1423132\_a\_at 1.01753 RIKEN cDNA 5730427N09 gene /// similar to TGF beta-inducible nuclear protein 1 (L-name-related protein 42) (LNR42) /// similar to TGF beta-inducible nuclear protein 1 (L-name related LNR42) 5730427N09Rik /// LOC433230 /// LOC636306  
 1423133\_at 1.08645 RIKEN cDNA 0610040D20 gene 0610040D20Rik  
 1423134\_at 1.19131 cDNA sequence BC003324 BC003324  
 1423135\_at 0.97955 "thymus cell antigen 1, theta" Thy1  
 1423136\_at 0.53920 fibroblast growth factor 1 Fgf1

|              |         |                                                                            |                     |
|--------------|---------|----------------------------------------------------------------------------|---------------------|
| 1423137_at   | 1.07358 | v-ral simian leukemia viral oncogene homolog A (ras related)               | Rala                |
| 1423138_at   | 1.11990 | WD repeat domain 4                                                         | Wdr4                |
| 1423139_at   | 0.92309 | WD repeat domain 4                                                         | Wdr4                |
| 1423140_at   | 0.86508 | lysosomal acid lipase 1                                                    | Lip1                |
| 1423141_at   | 0.94130 | Lysosomal acid lipase 1                                                    | Lip1                |
| 1423142_a_at | 1.08637 | GTP binding protein 4                                                      | Gtpbp4              |
| 1423143_at   | 1.03820 | GTP binding protein 4                                                      | Gtpbp4              |
| 1423144_at   | 1.02544 | "phosphatidylinositol 3-kinase, catalytic, alpha polypeptide"              | Pik3ca              |
| 1423145_a_at | 1.02962 | titin-cap                                                                  | Tcap                |
| 1423146_at   | 1.08270 | hairy and enhancer of split 5 (Drosophila)                                 | Hes5                |
| 1423147_at   | 1.01876 | "methionine adenosyltransferase I, alpha"                                  | Mat1a               |
| 1423148_at   | 0.96179 | S-phase kinase-associated protein 1A                                       | Skp1a               |
| 1423149_at   | 0.91904 | S-phase kinase-associated protein 1A                                       | Skp1a               |
| 1423150_at   | 1.07247 | secretogranin V                                                            | Scg5                |
| 1423151_at   | 0.98397 | "DnaJ (Hsp40) homolog, subfamily B, member 11"                             | Dnajb11             |
| 1423152_at   | 0.98513 | "vesicle-associated membrane protein, associated protein B and C"          | Vapb                |
| 1423153_x_at | 1.01962 | complement component factor h                                              | Cfh                 |
| 1423154_at   | 0.99398 | cDNA sequence BC005537                                                     | BC005537            |
| 1423155_at   | 0.90963 | sorcin                                                                     | Sri                 |
| 1423156_at   | 0.97667 | glucosamine-phosphate N-acetyltransferase 1                                | Gnpnat1             |
| 1423157_at   | 0.84401 | glucosamine-phosphate N-acetyltransferase 1                                | Gnpnat1             |
| 1423158_at   | 1.04663 | glucosamine-phosphate N-acetyltransferase 1                                | Gnpnat1             |
| 1423159_at   | 0.96521 | dihydrolipoamide dehydrogenase                                             | Dld                 |
| 1423160_at   | 1.07517 | "sprouty protein with EVH-1 domain 1, related sequence"                    | Spred1              |
| 1423161_s_at | 1.11769 | "sprouty protein with EVH-1 domain 1, related sequence"                    | Spred1              |
| 1423162_s_at | 1.12772 | "sprouty protein with EVH-1 domain 1, related sequence"                    | Spred1              |
| 1423163_at   | 1.06077 | HLA-B associated transcript 4                                              | Bat4                |
| 1423164_at   | 0.99582 | similar to transmembrane 7 superfamily member 1                            | LOC664862           |
| 1423165_a_at | 0.97711 | "metastasis-associated gene family, member 2"                              | Mta2                |
| 1423166_at   | 1.03552 | CD36 antigen                                                               | Cd36                |
| 1423167_at   | 1.00405 | preimplantation protein 3                                                  | Prei3               |
| 1423168_at   | 1.07702 | preimplantation protein 3                                                  | Prei3               |
| 1423169_at   | 0.82015 | "TAF7 RNA polymerase II, TATA box binding protein (TBP)-associated factor" | Taf7                |
| 1423170_at   | 0.78655 | "TAF7 RNA polymerase II, TATA box binding protein (TBP)-associated factor" | Taf7                |
| 1423171_at   | 0.94438 | G-protein coupled receptor 88 /// similar to G-protein coupled receptor 88 | Gpr88 /// LOC671461 |
| 1423172_at   | 1.03221 | N-ethylmaleimide sensitive fusion protein attachment protein beta          | Napb                |
| 1423173_at   | 1.09635 | N-ethylmaleimide sensitive fusion protein attachment protein beta          | Napb                |
| 1423174_a_at | 0.99000 | par-6 (partitioning defective 6) homolog beta (C. elegans)                 | Pard6b              |
| 1423175_s_at | 0.99671 | par-6 (partitioning defective 6) homolog beta (C. elegans)                 | Pard6b              |
| 1423176_at   | 0.91201 | transducer of ErbB-2.1                                                     | Tob1                |

|              |         |                                                                          |               |           |
|--------------|---------|--------------------------------------------------------------------------|---------------|-----------|
| 1423177_a_at | 0.99509 | abl-interactor 1                                                         | Abi1          |           |
| 1423178_at   | 0.87451 | abl-interactor 1                                                         | Abi1          |           |
| 1423179_at   | 0.88794 | "potassium voltage gated channel, Shab-related subfamily, member 1"      |               | Kcnb1     |
| 1423180_at   | 0.93103 | "potassium voltage gated channel, Shab-related subfamily, member 1"      |               | Kcnb1     |
| 1423181_s_at | 1.06063 | "chloride channel, nucleotide-sensitive, 1A"                             | Clns1a        |           |
| 1423182_at   | 0.95521 | "tumor necrosis factor receptor superfamily, member 13b"                 |               | Tnfrsf13b |
| 1423183_at   | 0.99422 | "leucine-rich repeat LGI family, member 1"                               | Lgi1          |           |
| 1423184_at   | 1.15685 | intersectin 2                                                            | Its2          |           |
| 1423185_a_at | 1.01463 | ubiquitin-associated protein 1                                           | Ubap1         |           |
| 1423186_at   | 1.35928 | T-cell lymphoma invasion and metastasis 2                                | Tiam2         |           |
| 1423187_at   | 0.99471 | gamma-aminobutyric acid (GABA-A) receptor-associated protein-like 2      |               | Gabarapl2 |
| 1423188_a_at | 0.97318 | RIKEN cDNA 6720456B07 gene                                               | 6720456B07Rik |           |
| 1423189_at   | 0.99857 | RIKEN cDNA 6720456B07 gene                                               | 6720456B07Rik |           |
| 1423190_at   | 0.93242 | RIKEN cDNA 1810020G14 gene                                               | 1810020G14Rik |           |
| 1423191_at   | 1.07910 | formin binding protein 4                                                 | Fnbp4         |           |
| 1423192_at   | 1.04292 | paraspeckle protein 1                                                    | Pspc1         |           |
| 1423193_at   | 0.99621 | paraspeckle protein 1                                                    | Pspc1         |           |
| 1423194_at   | 0.86457 | Rho GTPase activating protein 5                                          | Arhgap5       |           |
| 1423195_at   | 1.02824 | hippocampus abundant gene transcript 1                                   | Hiat1         |           |
| 1423196_at   | 0.95743 | "neural precursor cell expressed, developmentally down-regulated gene 1" |               | Nedd1     |
| 1423197_a_at | 1.06452 | expressed sequence AW011752                                              | AW011752      |           |
| 1423198_a_at | 1.02420 | expressed sequence AW011752                                              | AW011752      |           |
| 1423199_at   | 1.10316 | bromodomain containing 3                                                 | Brd3          |           |
| 1423200_at   | 0.89411 | nuclear receptor co-repressor 1                                          | Ncor1         |           |
| 1423201_at   | 0.97123 | nuclear receptor co-repressor 1                                          | Ncor1         |           |
| 1423202_a_at | 0.99999 | nuclear receptor co-repressor 1                                          | Ncor1         |           |
| 1423203_a_at | 0.92460 | centrin 1                                                                | Cetn1         |           |
| 1423204_at   | 1.06256 | transmembrane 9 superfamily protein member 4                             | Tm9sf4        |           |
| 1423205_at   | 0.97779 | transmembrane 9 superfamily protein member 4                             | Tm9sf4        |           |
| 1423206_s_at | 1.03314 | RIKEN cDNA 2310003F16 gene                                               | 2310003F16Rik |           |
| 1423207_at   | 0.90864 | ---                                                                      | ---           |           |
| 1423208_at   | 0.94448 | transmembrane protein 167                                                | Tmem167       |           |
| 1423209_at   | 1.05164 | ---                                                                      | ---           |           |
| 1423210_a_at | 0.96436 | "nucleolar protein family A, member 3"                                   | Nola3         |           |
| 1423211_at   | 1.10196 | "nucleolar protein family A, member 3"                                   | Nola3         |           |
| 1423212_at   | 0.95636 | polyhomeotic-like 1 (Drosophila)                                         | Phc1          |           |
| 1423213_at   | 1.04204 | plexin C1                                                                | Plxnc1        |           |
| 1423214_at   | 0.98333 | plexin C1                                                                | Plxnc1        |           |
| 1423215_at   | 0.98713 | signal peptidase complex subunit 2 homolog (S. cerevisiae)               |               | Spcs2     |
| 1423216_a_at | 0.99668 | RIKEN cDNA 2510049I19 gene                                               | 2510049I19Rik |           |
| 1423217_a_at | 0.88633 | RIKEN cDNA 2510049I19 gene                                               | 2510049I19Rik |           |

1423218\_a\_at 0.96667 mitochondrial ribosomal protein L49 Mrpl49  
 1423219\_a\_at 0.99321 mitochondrial ribosomal protein L49 Mrpl49  
 1423220\_at 1.03794 eukaryotic translation initiation factor 4E /// hypothetical LOC630527 Eif4e ///  
 LOC630527  
 1423221\_at 1.02214 "tubulin, beta 4" Tubb4  
 1423222\_at 0.98595 "CAP, adenylate cyclase-associated protein, 2 (yeast)" Cap2  
 1423223\_a\_at 1.14280 peroxiredoxin 6 Prdx6  
 1423224\_at 0.80411 RIKEN cDNA 4432405B04 gene 4432405B04Rik  
 1423225\_at 1.05521 selenoprotein K Selk  
 1423226\_at 0.93016 "membrane-spanning 4-domains, subfamily A, member 1" Ms4a1  
 1423227\_at 0.95573 keratin 17 Krt17  
 1423228\_at 1.26409 "UDP-Gal:betaGlcNAc beta 1,4-galactosyltransferase, polypeptide 6 /// similar  
 to Beta-1,4-galactosyltransferase 6 (Beta-1,4-GalTase 6) (Beta4Gal-T6) (b4Gal-T6) (UDP-galactose:  
 beta-N-acetylglucosamine beta-1,4-galactosyltransferase 6) (UDP-Gal:beta-GlcNAc beta-1,4-  
 galactosyltransferase 6)" B4galt6 /// LOC675709  
 1423229\_at 0.96386 inositol polyphosphate-5-phosphatase E Inpp5e  
 1423230\_at 1.03563 inositol polyphosphate-5-phosphatase E Inpp5e  
 1423231\_at 0.95821 neurogranin Nrgn  
 1423232\_at 1.20752 "ets variant gene 4 (E1A enhancer binding protein, E1AF)" Etv4  
 1423233\_at 3.68779 "CCAAT/enhancer binding protein (C/EBP), delta" Cebpd  
 1423234\_at 1.00154 "proteasome (prosome, macropain) 26S subunit, non-ATPase, 5" Psmd5  
 1423235\_at 0.96676 "adaptor-related protein complex 3, beta 1 subunit" Ap3b1  
 1423236\_at 0.85649 UDP-N-acetyl-alpha-D-galactosamine:polypeptide N-  
 acetylgalactosaminyltransferase 1 Galnt1  
 1423237\_at 0.94695 UDP-N-acetyl-alpha-D-galactosamine:polypeptide N-  
 acetylgalactosaminyltransferase 1 Galnt1  
 1423238\_at 1.25183 integrin beta 1 binding protein 2 Itgb1bp2  
 1423239\_at 0.98807 inosine 5'-phosphate dehydrogenase 1 Impdh1  
 1423240\_at 1.06383 Rous sarcoma oncogene Src  
 1423241\_a\_at 0.97968 transcription factor Dp 1 /// similar to Transcription factor Dp-1 (E2F  
 dimerization partner 1) (DRTF1-polypeptide 1) /// similar to Transcription factor Dp-1 (E2F  
 dimerization partner 1) (DRTF1-polypeptide 1) /// similar to Transcription factor Dp-1 (E2F  
 dimerization partner 1) (DRTF1-polypeptide 1) Tfdp1 /// LOC664889 /// LOC672007 /// LOC674691  
 1423242\_at 1.00793 mitochondrial ribosomal protein S36 Mrps36  
 1423243\_at 1.09718 "membrane protein, palmitoylated" Mpp1  
 1423244\_at 1.01033 RIKEN cDNA 9030012A22 gene 9030012A22Rik  
 1423245\_at 1.11980 "COP9 (constitutive photomorphogenic) homolog, subunit 7a (Arabidopsis  
 thaliana)" Cops7a  
 1423246\_at 0.79335 thioredoxin domain containing 4 (endoplasmic reticulum) Txndc4  
 1423247\_at 0.91138 thioredoxin domain containing 4 (endoplasmic reticulum) Txndc4  
 1423248\_at 1.08227 natural killer tumor recognition sequence Nkr  
 1423249\_at 0.93841 natural killer tumor recognition sequence Nkr  
 1423250\_a\_at 0.85011 "transforming growth factor, beta 2" Tgfb2

1423251\_at 1.08718 LUC7-like 2 (*S. cerevisiae*) Luc712  
 1423252\_at 1.12123 "hepatoma-derived growth factor, related protein 3" Hdgfrp3  
 1423253\_at 1.06414 myelin protein zero Mpz  
 1423254\_x\_at 1.06983 ribosomal protein S27-like Rps271  
 1423255\_at 1.17684 "ATPase, H<sup>+</sup> transporting, lysosomal V1 subunit G1" Atp6v1g1  
 1423256\_a\_at 1.03425 "ATPase, H<sup>+</sup> transporting, lysosomal V1 subunit G1 /// similar to vacuolar H<sup>+</sup> ATPase G1 /// similar to vacuolar H<sup>+</sup> ATPase G1 /// similar to vacuolar H<sup>+</sup> ATPase G1" Atp6v1g1 ///  
 LOC666030 /// LOC671155 /// LOC671196  
 1423257\_at 0.98427 "cytochrome P450, family 4, subfamily a, polypeptide 14" Cyp4a14  
 1423258\_at 0.78763 synaptotagmin IX Syt9  
 1423259\_at 0.65132 inhibitor of DNA binding 4 Id4  
 1423260\_at 0.72511 inhibitor of DNA binding 4 Id4  
 1423261\_at 0.79840 RIKEN cDNA 1500015O10 gene 1500015O10Rik  
 1423262\_a\_at 0.92844 "H3 histone, family 3A /// similar to H3 histone, family 3B /// similar to H3 histone, family 3B" H3f3a /// LOC623365 /// LOC624812 ///  
 LOC625328 /// LOC633468 /// LOC667250 /// LOC670535  
 1423263\_at 0.89735 "H3 histone, family 3A" H3f3a  
 1423264\_at 1.04373 block of proliferation 1 Bop1  
 1423265\_at 0.95806 multiple inositol polyphosphate histidine phosphatase 1 Minpp1  
 1423266\_at 0.88696 RIKEN cDNA 2810405K02 gene 2810405K02Rik  
 1423267\_s\_at 0.95327 integrin alpha 5 (fibronectin receptor alpha) Itga5  
 1423268\_at 0.87035 integrin alpha 5 (fibronectin receptor alpha) Itga5  
 1423269\_a\_at 0.92018 "neural precursor cell expressed, developmentally down-regulated gene 4-like" Nedd4l  
 1423270\_at 0.88855 "neural precursor cell expressed, developmentally down-regulated gene 4-like" Nedd4l  
 1423271\_at 0.92356 gap junction membrane channel protein beta 2 Gjb2  
 1423272\_at 0.96388 "polymerase (DNA directed), gamma" Polg  
 1423273\_at 1.00092 "polymerase (DNA directed), gamma" Polg  
 1423274\_at 1.09619 integrator complex subunit 6 Ints6  
 1423275\_at 1.10839 integrator complex subunit 6 Ints6  
 1423276\_at 0.92178 immunoglobulin-like domain containing receptor 1 Ildr1  
 1423277\_at 0.94510 "protein tyrosine phosphatase, receptor type, K" Ptpkr  
 1423278\_at 0.72619 "protein tyrosine phosphatase, receptor type, K" Ptpkr  
 1423279\_at 0.92906 "solute carrier family 34 (sodium phosphate), member 1" Slc34a1  
 1423280\_at 1.02288 stathmin-like 2 Stmn2  
 1423281\_at 0.90125 stathmin-like 2 Stmn2  
 1423282\_at 0.98652 "phosphatidylinositol transfer protein, alpha" Pitpna  
 1423283\_at 1.01204 "phosphatidylinositol transfer protein, alpha" Pitpna  
 1423284\_at 1.12183 MANS domain containing 1 Mansc1  
 1423285\_at 0.99630 coagulation factor C homolog (*Limulus polyphemus*) Coch  
 1423286\_at 0.88480 cerebellin 1 precursor protein Cbln1

|              |                                                                          |                   |        |
|--------------|--------------------------------------------------------------------------|-------------------|--------|
| 1423287_at   | 0.94441 cerebellin 1 precursor protein                                   | Cbln1             |        |
| 1423288_s_at | 0.85961 cerebellin 1 precursor protein                                   | Cbln1             |        |
| 1423289_a_at | 1.07855 RIKEN cDNA 1810029B16 gene                                       | 1810029B16Rik     |        |
| 1423290_at   | 0.96903 hypoxia up-regulated 1                                           | Hyou1             |        |
| 1423291_s_at | 0.92966 hypoxia up-regulated 1                                           | Hyou1             |        |
| 1423292_a_at | 0.90006 periaxin                                                         | Prx               |        |
| 1423293_at   | 1.04899 replication protein A1                                           | Rpa1              |        |
| 1423294_at   | 0.95324 mesoderm specific transcript                                     | Mest              |        |
| 1423295_at   | 0.95040 transmembrane 9 superfamily member 2                             | Tm9sf2            |        |
| 1423296_at   | 1.06839 "proteasome (prosome, macropain) 26S subunit, non-ATPase, 8"     | Psm8              |        |
| 1423297_at   | 0.94772 adducin 3 (gamma)                                                | Add3              |        |
| 1423298_at   | 0.85254 adducin 3 (gamma)                                                | Add3              |        |
| 1423299_at   | 0.98924 thioredoxin-like 1                                               | Txn1              |        |
| 1423300_at   | 0.98107 "zinc finger, DHHC domain containing 6"                          | Zdhhc6            |        |
| 1423301_at   | 0.99358 "coatamer protein complex, subunit beta 1"                       | Cop1              |        |
| 1423302_a_at | 1.02937 PAX interacting (with transcription-activation domain) protein 1 |                   | Paxip1 |
| 1423303_at   | 0.95994 PAX interacting (with transcription-activation domain) protein 1 |                   | Paxip1 |
| 1423304_a_at | 1.01950 ring finger 111                                                  | Rnf111            |        |
| 1423305_at   | 0.95400 exostoses (multiple)-like 1                                      | Ext1              |        |
| 1423306_at   | 1.22941 RIKEN cDNA 2010002N04 gene                                       | 2010002N04Rik     |        |
| 1423307_s_at | 0.88219 trans-golgi network protein /// trans-golgi network protein 2    | Tgoln1 /// Tgoln2 |        |
| 1423308_at   | 0.97863 trans-golgi network protein                                      | Tgoln1            |        |
| 1423309_at   | 0.96256 trans-golgi network protein                                      | Tgoln1            |        |
| 1423310_at   | 0.93915 trophoblast glycoprotein                                         | Tpbg              |        |
| 1423311_s_at | 0.89731 trophoblast glycoprotein                                         | Tpbg              |        |
| 1423312_at   | 1.02244 trophoblast glycoprotein                                         | Tpbg              |        |
| 1423313_at   | 1.05308 phosphodiesterase 7A                                             | Pde7a             |        |
| 1423314_s_at | 1.20123 phosphodiesterase 7A                                             | Pde7a             |        |
| 1423315_at   | 0.99780 Bcl-2 binding component 3                                        | Bbc3              |        |
| 1423316_at   | 0.94600 transmembrane protein 39a                                        | Tmem39a           |        |
| 1423317_at   | 0.93309 RIKEN cDNA 3110001D03 gene                                       | 3110001D03Rik     |        |
| 1423318_at   | 0.97608 RAD18 homolog (S. cerevisiae)                                    | Rad18             |        |
| 1423319_at   | 0.92610 hematopoietically expressed homeobox                             | Hhex              |        |
| 1423320_at   | 1.22676 deoxyribonuclease 1-like 2                                       | Dnase12           |        |
| 1423321_at   | 1.03342 myeloid-associated differentiation marker                        | Myadm             |        |
| 1423322_at   | 0.96850 lin-7 homolog C (C. elegans)                                     | Lin7c             |        |
| 1423323_at   | 1.03069 tumor-associated calcium signal transducer 2                     | Tacstd2           |        |
| 1423324_at   | 1.12009 pinin                                                            | Pnn               |        |
| 1423325_at   | 0.91482 pinin                                                            | Pnn               |        |
| 1423326_at   | 0.94586 ectonucleoside triphosphate diphosphohydrolase 1                 | Entpd1            |        |
| 1423327_at   | 0.97994 RIKEN cDNA 4930517K11 gene                                       | 4930517K11Rik     |        |
| 1423328_at   | 0.96189 ganglioside-induced differentiation-associated-protein 1         |                   | Gdap1  |
| 1423329_at   | 1.01363 ganglioside-induced differentiation-associated-protein 1         |                   | Gdap1  |



|              |         |                                                                       |               |  |
|--------------|---------|-----------------------------------------------------------------------|---------------|--|
| 1423330_at   | 0.89013 | endosulfine alpha                                                     | Ensa          |  |
| 1423331_a_at | 0.84131 | poliovirus receptor-related 3                                         | Pvrl3         |  |
| 1423332_at   | 0.97572 | syndecan binding protein                                              | Sdcbp         |  |
| 1423333_at   | 0.99280 | RIKEN cDNA 1200007D18 gene                                            | 1200007D18Rik |  |
| 1423334_at   | 1.02514 | RIKEN cDNA 1200007D18 gene                                            | 1200007D18Rik |  |
| 1423335_at   | 1.04085 | RIKEN cDNA 1110004F10 gene                                            | 1110004F10Rik |  |
| 1423336_at   | 1.02306 | "origin recognition complex, subunit 4-like ( <i>S. cerevisiae</i> )" | Orc4l         |  |
| 1423337_at   | 1.02774 | "origin recognition complex, subunit 4-like ( <i>S. cerevisiae</i> )" | Orc4l         |  |
| 1423338_at   | 0.97547 | coiled-coil domain containing 16                                      | Ccdc16        |  |
| 1423339_s_at | 1.00596 | coiled-coil domain containing 16                                      | Ccdc16        |  |
| 1423340_at   | 0.97205 | transcription factor AP-2 beta                                        | Tcfap2b       |  |
| 1423341_at   | 0.74397 | chondroitin sulfate proteoglycan 4                                    | Cspg4         |  |
| 1423342_at   | 1.07724 | BarH-like homeobox 1                                                  | Barx1         |  |
| 1423343_at   | 1.03952 | "solute carrier organic anion transporter family, member 1c1"         | Slco1c1       |  |
| 1423344_at   | 1.03886 | erythropoietin receptor                                               | Epor          |  |
| 1423345_at   | 0.98566 | degenerative spermatocyte homolog 1 ( <i>Drosophila</i> )             | Degs1         |  |
| 1423346_at   | 0.91524 | degenerative spermatocyte homolog 1 ( <i>Drosophila</i> )             | Degs1         |  |
| 1423347_at   | 0.81268 | SEC23A ( <i>S. cerevisiae</i> )                                       | Sec23a        |  |
| 1423348_at   | 0.70832 | frizzled homolog 8 ( <i>Drosophila</i> )                              | Fzd8          |  |
| 1423349_at   | 1.01336 | suppressor of cytokine signaling 5                                    | Socs5         |  |
| 1423350_at   | 1.02929 | suppressor of cytokine signaling 5                                    | Socs5         |  |
| 1423351_at   | 0.87892 | mitochondrial ribosomal protein L1                                    | Mrpl1         |  |
| 1423352_at   | 0.95904 | cysteine-rich secretory protein LCCL domain containing 1              | Crispld1      |  |
| 1423353_at   | 1.02865 | cysteine-rich secretory protein LCCL domain containing 1              | Crispld1      |  |
| 1423354_at   | 0.93505 | synaptosomal-associated protein Snap29                                |               |  |
| 1423355_at   | 1.24592 | synaptosomal-associated protein Snap29                                |               |  |
| 1423356_at   | 0.82396 | synaptosomal-associated protein Snap29                                |               |  |
| 1423357_at   | 0.86033 | RIKEN cDNA 2610209A20 gene                                            | 2610209A20Rik |  |
| 1423358_at   | 0.92073 | RIKEN cDNA 1810009K13 gene                                            | 1810009K13Rik |  |
| 1423359_at   | 1.03688 | phospholamban                                                         | Pln           |  |
| 1423360_at   | 1.05289 | YME1-like 1 ( <i>S. cerevisiae</i> )                                  | Yme1l1        |  |
| 1423361_at   | 1.08017 | YME1-like 1 ( <i>S. cerevisiae</i> )                                  | Yme1l1        |  |
| 1423362_at   | 0.79553 | sortilin 1                                                            | Sort1         |  |
| 1423363_at   | 0.81731 | sortilin 1                                                            | Sort1         |  |
| 1423364_a_at | 0.90985 | fused toes                                                            | Fts           |  |
| 1423365_at   | 0.73502 | "calcium channel, voltage-dependent, T type, alpha 1G subunit"        | Cacna1g       |  |
| 1423366_at   | 0.91354 | stearoyl-coenzyme A desaturase 3                                      | Scd3          |  |
| 1423367_at   | 1.17881 | wingless-related MMTV integration site 7A                             | Wnt7a         |  |
| 1423368_at   | 0.94776 | lysosomal-associated protein transmembrane 4A                         | Laptm4a       |  |
| 1423369_at   | 0.96004 | fragile X mental retardation syndrome 1 homolog                       | Fmr1          |  |
| 1423370_a_at | 0.97592 | "casein kinase 1, gamma 2"                                            | Csnk1g2       |  |
| 1423371_at   | 0.91974 | "polymerase (DNA-directed), epsilon 4 (p12 subunit)"                  | Pole4         |  |
| 1423372_at   | 1.02751 | "polymerase (DNA-directed), epsilon 4 (p12 subunit)"                  | Pole4         |  |

1423373\_at 1.09196 ribonuclease P/MRP 30 subunit (human) Rpp30  
1423374\_at 1.06333 nuclear receptor coactivator 6 Ncoa6  
1423375\_at 1.18996 RIKEN cDNA 1700023B02 gene 1700023B02Rik  
1423376\_a\_at 0.88264 docking protein 4 Dok4  
1423377\_at 1.10557 insulin-like growth factor binding protein-like 1 Igfbpl1  
1423378\_at 0.91446 a disintegrin and metallopeptidase domain 23 Adam23  
1423379\_at 0.89269 "nuclear factor of activated T-cells, cytoplasmic, calcineurin-dependent 4 /// similar to cytoplasmic nuclear factor of activated T-cells 4" Nfatc4 /// LOC672021  
1423380\_s\_at 0.76808 "nuclear factor of activated T-cells, cytoplasmic, calcineurin-dependent 4" Nfatc4  
1423381\_at 0.82248 RIKEN cDNA 4921521F21 gene 4921521F21Rik  
1423382\_a\_at 1.00025 heterogeneous nuclear ribonucleoprotein F /// similar to heterogeneous nuclear ribonucleoprotein F Hnrpf /// LOC637008 /// LOC672616  
1423383\_a\_at 0.96895 oxysterol binding protein-like 9 Osbp19  
1423384\_s\_at 0.96445 testis expressed gene 261 Tex261  
1423385\_at 0.90365 ARP8 actin-related protein 8 homolog (S. cerevisiae) Actr8  
1423386\_at 1.08987 "proteasome (prosome, macropain) 26S subunit, non-ATPase, 9" Psm9  
1423387\_at 0.81435 "proteasome (prosome, macropain) 26S subunit, non-ATPase, 9" Psm9  
1423388\_at 1.03979 "adaptor protein complex AP-1, gamma 1 subunit" Ap1g1  
1423389\_at 0.76961 MAD homolog 7 (Drosophila) Smad7  
1423390\_at 0.95199 seven in absentia 1A Siah1a  
1423391\_at 1.01384 G protein-coupled receptor kinase-interactor 2 Git2  
1423392\_at 0.98039 chloride intracellular channel 4 (mitochondrial) Clic4  
1423393\_at 0.97095 chloride intracellular channel 4 (mitochondrial) Clic4  
1423394\_at 0.91651 prenylcysteine oxidase 1 Pcyox1  
1423395\_at 1.00847 translin-associated factor X Tsnax  
1423396\_at 0.73761 "angiotensinogen (serpin peptidase inhibitor, clade A, member 8)" Agt  
1423397\_at 0.92987 "UDP glucuronosyltransferase 2 family, polypeptide B38" Ugt2b38  
1423398\_at 1.04324 "TAF12 RNA polymerase II, TATA box binding protein (TBP)-associated factor" Taf12  
1423399\_a\_at 0.93946 YY1 associated factor 2 Yaf2  
1423400\_at 1.00497 klotho Kl  
1423401\_at 0.97792 ets variant gene 6 (TEL oncogene) Etv6  
1423402\_at 1.11107 cAMP responsive element binding protein 1 Creb1  
1423403\_at 0.81480 mitogen activated protein kinase binding protein 1 Mapkbp1  
1423404\_at 1.03830 gastroke 1 Gkn1  
1423405\_at 1.00544 tissue inhibitor of metalloproteinase 4 Timp4  
1423406\_at 0.81627 synaptic vesicle glycoprotein 2 a Sv2a  
1423407\_a\_at 0.76751 fibulin 2 Fbln2  
1423408\_a\_at 0.97210 RIKEN cDNA 2500003M10 gene 2500003M10Rik  
1423409\_a\_at 0.93617 RIKEN cDNA 2500003M10 gene 2500003M10Rik  
1423410\_at 0.95944 meiosis expressed gene 1 Meig1

1423411\_at 0.91199 cDNA sequence BC013481 BC013481  
1423412\_at 0.95537 cDNA sequence BC013481 BC013481  
1423413\_at 1.04805 N-myc downstream regulated gene 1 Ndrp1  
1423414\_at 0.62171 prostaglandin-endoperoxide synthase 1 Ptgs1  
1423415\_at 0.89160 G protein-coupled receptor 83 Gpr83  
1423416\_at 0.97051 "SWI/SNF related, matrix associated, actin dependent regulator of chromatin, subfamily c, member 1" Smarcc1  
1423417\_at 1.01290 "SWI/SNF related, matrix associated, actin dependent regulator of chromatin, subfamily c, member 1" Smarcc1  
1423418\_at 1.59456 farnesyl diphosphate synthetase Fdps  
1423419\_at 1.11087 "ligase III, DNA, ATP-dependent" Lig3  
1423420\_at 1.10370 "adrenergic receptor, beta 1" Adrb1  
1423421\_at 0.97543 ankyrin repeat domain 49 Ankrd49  
1423422\_at 1.03095 ankyrin repeat and SOCS box-containing protein 4 Asb4  
1423423\_at 0.97977 protein disulfide isomerase associated 3 Pdia3  
1423424\_at 0.93080 zinc finger protein of the cerebellum 3 Zic3  
1423425\_at 0.91149 RIKEN cDNA 1300012G16 gene 1300012G16Rik  
1423426\_at 0.94024 RIKEN cDNA 1300012G16 gene 1300012G16Rik  
1423427\_at 0.96945 adenylate cyclase activating polypeptide 1 Adcyap1  
1423428\_at 0.91268 receptor tyrosine kinase-like orphan receptor 2 Ror2  
1423429\_at 0.94201 reproductive homeobox 5 Rhox5  
1423430\_at 1.24814 MYB binding protein (P160) 1a Mybbp1a  
1423431\_a\_at 1.24075 MYB binding protein (P160) 1a Mybbp1a  
1423432\_at 1.12047 pleckstrin homology domain interacting protein Phip  
1423433\_at 1.07914 "TROVE domain family, member 2" Trove2  
1423434\_at 1.02186 TEA domain family member 1 Tead1  
1423435\_at 0.96484 --- ---  
1423436\_at 1.09022 "glutathione S-transferase, alpha 3" Gsta3  
1423437\_at 1.01114 --- ---  
1423438\_at 1.04461 kaptin Kptn  
1423439\_at 0.99430 "phosphoenolpyruvate carboxykinase 1, cytosolic" Pck1  
1423440\_at 0.99059 RIKEN cDNA 1110001A07 gene 1110001A07Rik  
1423441\_at 1.04075 "transcription factor B2, mitochondrial" Tfb2m  
1423442\_a\_at 0.98987 F-box and WD-40 domain protein 2 Fbxw2  
1423443\_at 0.79563 "solute carrier family 4 (anion exchanger), member 8" Slc4a8  
1423444\_at 1.06536 Rho-associated coiled-coil containing protein kinase 1 Rock1  
1423445\_at 0.97341 Rho-associated coiled-coil containing protein kinase 1 Rock1  
1423446\_at 0.97899 death-associated kinase 3 Dapk3  
1423447\_at 1.05493 caseinolytic peptidase X (E.coli) Clpx  
1423448\_at 0.94431 "RAB11B, member RAS oncogene family" Rab11b  
1423449\_a\_at 0.98257 actinin alpha 4 Actn4  
1423450\_a\_at 0.89962 heparan sulfate (glucosamine) 3-O-sulfotransferase 1 Hs3st1  
1423451\_at 0.87020 progesterone receptor membrane component 1 Pgrmc1

1423452\_at 0.93657 serine/threonine kinase 17b (apoptosis-inducing) Stk17b  
 1423453\_at 1.08403 nucleolar protein 12 Nol12  
 1423454\_a\_at 0.81368 "sema domain, transmembrane domain (TM), and cytoplasmic domain, (semaphorin) 6C" Sema6c  
 1423455\_at 1.01447 prothymosin alpha Ptma  
 1423456\_at 1.09269 basic leucine zipper and W2 domains 2 Bzw2  
 1423457\_at 0.86625 "solute carrier family 35, member A5" Slc35a5  
 1423458\_at 0.91073 "solute carrier family 35, member A5" Slc35a5  
 1423459\_at 1.02785 "COP9 (constitutive photomorphogenic) homolog, subunit 2 (Arabidopsis thaliana)" Cops2  
 1423460\_at 1.30355 "PERQ amino acid rich, with GYF domain 1" Perq1  
 1423461\_a\_at 0.97034 ubiquitin-like 3 Ubl3  
 1423462\_at 0.97475 mitogen-activated protein kinase kinase kinase 7 interacting protein 2 Map3k7ip2  
 1423463\_a\_at 1.07181 "DNA segment, Chr 2, ERATO Doi 750, expressed" D2Ertd750e  
 1423464\_at 1.03848 "DNA segment, Chr 2, ERATO Doi 750, expressed" D2Ertd750e  
 1423465\_at 1.10010 ferric-chelate reductase 1 /// similar to stromal cell derived factor receptor 2 Frrs1 /// LOC635993  
 1423466\_at 1.00542 chemokine (C-C motif) receptor 7 Ccr7  
 1423467\_at 0.95151 "membrane-spanning 4-domains, subfamily A, member 4B" Ms4a4b  
 1423468\_at 0.92362 STEAP family member 3 Steap3  
 1423469\_at 0.99787 RIKEN cDNA 1700129C05 gene 1700129C05Rik  
 1423470\_at 0.92069 polypyrimidine tract binding protein 2 Ptbp2  
 1423471\_at 0.71956 polypyrimidine tract binding protein 2 Ptbp2  
 1423472\_at 1.07020 septin 2 2-Sep  
 1423473\_at 1.09205 septin 2 2-Sep  
 1423474\_at 0.96819 topoisomerase (DNA) I Top1  
 1423475\_at 0.82408 cyclin M2 Cnm2  
 1423476\_at 0.86371 thymic stromal cotransporter Tscot  
 1423477\_at 1.01835 zinc finger protein of the cerebellum 1 Zic1  
 1423478\_at 0.85651 "protein kinase C, beta 1" Prkcb1  
 1423479\_at 1.00827 nucleolar protein 11 Nol11  
 1423480\_at 1.04674 nucleolar protein 11 Nol11  
 1423481\_at 1.04994 RIO kinase 2 (yeast) Riok2  
 1423482\_at 0.90965 uroporphyrinogen III synthase Uros  
 1423483\_s\_at 1.02555 "TATA box binding protein (Tbp)-associated factor, RNA polymerase I, C" Taf1c  
 1423484\_at 0.84879 bicaudal C homolog 1 (Drosophila) Biccl  
 1423485\_at 0.86618 Rad54 like 2 (S. cerevisiae) Rad54l2  
 1423486\_at 1.04666 cysteine-rich PDZ-binding protein Cript  
 1423487\_at 0.93449 cysteine-rich PDZ-binding protein Cript  
 1423488\_at 0.82204 monocyte to macrophage differentiation-associated Mmd  
 1423489\_at 0.82427 monocyte to macrophage differentiation-associated Mmd

|              |         |                                                                                      |                                 |  |
|--------------|---------|--------------------------------------------------------------------------------------|---------------------------------|--|
| 1423490_at   | 0.85723 | F-box only protein 3                                                                 | Fbxo3                           |  |
| 1423491_at   | 0.87771 | F-box only protein 3                                                                 | Fbxo3                           |  |
| 1423492_at   | 1.14690 | mitochondrial ribosomal protein L45                                                  | Mrpl45                          |  |
| 1423493_a_at | 0.82930 | nuclear factor I/X                                                                   | Nfix                            |  |
| 1423494_at   | 0.91289 | RIKEN cDNA 2310042E22 gene                                                           | 2310042E22Rik                   |  |
| 1423495_at   | 0.92146 | "2-4-dienoyl-Coenzyme A reductase 2, peroxisomal"                                    | Decr2                           |  |
| 1423496_a_at | 0.96333 | putative neuronal cell adhesion molecule                                             | Punc                            |  |
| 1423497_at   | 1.00288 | kelch-like 10 (Drosophila)                                                           | Klhl10                          |  |
| 1423498_at   | 1.12000 | "aldolase 1, A isoform, pseudogene 1"                                                | Aldoa-ps1                       |  |
| 1423499_at   | 0.99190 | "synuclein, alpha interacting protein (synphilin)"                                   | Sncaip                          |  |
| 1423500_a_at | 0.91776 | SRY-box containing gene 5                                                            | Sox5                            |  |
| 1423501_at   | 1.01606 | Max protein                                                                          | Max                             |  |
| 1423502_at   | 0.92130 | bromodomain containing 2                                                             | Brd2                            |  |
| 1423503_at   | 0.85295 | junction adhesion molecule 3                                                         | Jam3                            |  |
| 1423504_at   | 0.90199 | junction adhesion molecule 3                                                         | Jam3                            |  |
| 1423505_at   | 0.64889 | transgelin                                                                           | Tagln                           |  |
| 1423506_a_at | 1.04429 | neuronatin                                                                           | Nnat                            |  |
| 1423507_a_at | 0.93978 | "sirtuin 2 (silent mating type information regulation 2, homolog) 2 (S. cerevisiae)" | Sirt2                           |  |
| 1423508_at   | 0.95603 | MYST histone acetyltransferase monocytic leukemia 4                                  | Myst4                           |  |
| 1423509_a_at | 0.98908 | islet amyloid polypeptide                                                            | Iapp                            |  |
| 1423510_at   | 1.01596 | islet amyloid polypeptide                                                            | Iapp                            |  |
| 1423511_at   | 1.01076 | ASF1 anti-silencing function 1 homolog A (S. cerevisiae)                             | Asf1a                           |  |
| 1423512_at   | 0.90663 | expressed sequence AW209491                                                          | AW209491                        |  |
| 1423513_at   | 1.00100 | neogenin /// RIKEN cDNA E030041M21 gene Neo1 /// E030041M21Rik                       |                                 |  |
| 1423514_at   | 0.88456 | glycerol kinase-like 1                                                               | Gykl1                           |  |
| 1423515_at   | 0.95272 | "sodium channel, voltage-gated, type VIII, alpha"                                    | Scn8a                           |  |
| 1423516_a_at | 1.08822 | nidogen 2                                                                            | Nid2                            |  |
| 1423517_at   | 1.00771 | chaperonin subunit 6a (zeta)                                                         | Cct6a                           |  |
| 1423518_at   | 0.96846 | c-src tyrosine kinase                                                                | Csk                             |  |
| 1423519_at   | 0.89620 | RIKEN cDNA 2210412D01 gene                                                           | 2210412D01Rik                   |  |
| 1423520_at   | 1.09728 | lamin B1                                                                             | Lmnb1                           |  |
| 1423521_at   | 1.00263 | lamin B1                                                                             | Lmnb1                           |  |
| 1423522_at   | 1.18694 | "nucleoplasmin 3 /// nucleoplasmin 3, pseudogene 1 /// similar to Nucleoplasmin-3"   | Npm3 /// Npm3-ps1 /// LOC639633 |  |
| 1423523_at   | 1.01880 | aminoadipate-semialdehyde synthase                                                   | Aass                            |  |
| 1423524_at   | 1.01985 | microtubule associated serine/threonine kinase-like                                  | Mastl                           |  |
| 1423525_at   | 1.00800 | microtubule associated serine/threonine kinase-like                                  | Mastl                           |  |
| 1423526_at   | 1.00570 | AT rich interactive domain 3B (Bright like)                                          | Arid3b                          |  |
| 1423527_at   | 1.02060 | RIKEN cDNA 4921510H08 gene                                                           | 4921510H08Rik                   |  |
| 1423528_at   | 0.79961 | breast carcinoma amplified sequence 3                                                | Bcas3                           |  |
| 1423529_at   | 0.96934 | "glucose-6-phosphatase, catalytic, 2"                                                | G6pc2                           |  |
| 1423530_at   | 0.85105 | serine/threonine kinase 32C                                                          | Stk32c                          |  |

1423531\_a\_at 1.06525 heterogeneous nuclear ribonucleoprotein A1 Hnrpa1  
1423532\_at 0.98460 ring finger protein 44 Rnf44  
1423533\_a\_at 1.01127 "ras homolog gene family, member T1" Rhot1  
1423534\_at 1.09962 programmed cell death 2 Pcd2  
1423535\_at 0.96540 "striatin, calmodulin binding protein 3" Strn3  
1423536\_at 1.03114 "striatin, calmodulin binding protein 3" Strn3  
1423537\_at 1.10453 growth associated protein 43 Gap43  
1423538\_at 0.96516 N-terminal Asn amidase Ntan1  
1423539\_at 1.03542 postmeiotic segregation increased 2 (S. cerevisiae) Pms2  
1423540\_at 0.98362 "RNA binding motif, single stranded interacting protein 2" Rbms2  
1423541\_at 1.03215 RIKEN cDNA 4930511I11 gene 4930511I11Rik  
1423542\_at 1.03022 "kallikrein 7 (chymotryptic, stratum corneum)" Klk7  
1423543\_at 0.98462 SWA-70 protein Swap70  
1423544\_at 1.03814 "protein tyrosine phosphatase, non-receptor type 5" Ptpn5  
1423545\_a\_at 1.09111 zinc finger protein 207 Zfp207  
1423546\_at 1.09895 zinc finger protein 207 Zfp207  
1423547\_at 1.21895 lysozyme Lyzs  
1423548\_s\_at 0.94257 ERGIC and golgi 3 Ergic3  
1423549\_at 1.03053 "solute carrier family 1 (glutamate/neutral amino acid transporter), member 4"  
Slc1a4  
1423550\_at 1.01499 "solute carrier family 1 (glutamate/neutral amino acid transporter), member 4"  
Slc1a4  
1423551\_at 1.23782 cadherin 13 Cdh13  
1423552\_at 1.00670 leptin receptor overlapping transcript-like 1 Leprotl1  
1423553\_at 1.04287 "DnaJ (Hsp40) homolog, subfamily B, member 3" Dnajb3  
1423554\_at 0.86040 gamma-glutamyl carboxylase Ggcx  
1423555\_a\_at 1.02445 interferon-induced protein 44 Ifi44  
1423556\_at 0.78163 "aldo-keto reductase family 1, member B7" Akr1b7  
1423557\_at 1.27628 interferon gamma receptor 2 Ifngr2  
1423558\_at 1.22295 interferon gamma receptor 2 Ifngr2  
1423559\_at 1.02194 "potassium voltage gated channel, Shaw-related subfamily, member 1" Kcnc1  
1423560\_at 1.16816 NEL-like 2 (chicken) Nell2  
1423561\_at 0.88926 NEL-like 2 (chicken) Nell2  
1423562\_at 1.09370 proline-rich transmembrane protein 1 Prrt1  
1423563\_at 0.87434 proline-rich transmembrane protein 1 Prrt1  
1423564\_a\_at 0.93400 "phosphoribosylaminoimidazole carboxylase,  
phosphoribosylaminoribosylaminoimidazole, succinocarboxamide synthetase" Paics  
1423565\_at 0.95343 "phosphoribosylaminoimidazole carboxylase,  
phosphoribosylaminoribosylaminoimidazole, succinocarboxamide synthetase" Paics  
1423566\_a\_at 0.98504 heat shock protein 110 Hsp110  
1423567\_a\_at 1.12658 "proteasome (prosome, macropain) subunit, alpha type 7" Psma7  
1423568\_at 1.16844 "proteasome (prosome, macropain) subunit, alpha type 7" Psma7  
1423569\_at 0.94458 glycine amidinotransferase (L-arginine:glycine amidinotransferase) Gatm

1423570\_at 1.01809 "ATP-binding cassette, sub-family G (WHITE), member 1" Abcg1  
1423571\_at 0.93004 endothelial differentiation sphingolipid G-protein-coupled receptor 1 Edg1  
1423572\_at 1.14467 Bcl2-like 2 Bcl2l2  
1423573\_at 1.06386 steroid 5 alpha-reductase 2-like Srd5a2l  
1423574\_s\_at 1.06040 steroid 5 alpha-reductase 2-like Srd5a2l  
1423575\_a\_at 0.96094 Williams Beuren syndrome chromosome region 22 Wbscr22  
1423576\_a\_at 0.93231 four and a half LIM domains 4 Fhl4  
1423577\_at 1.09841 ankyrin repeat domain 32 Ankrd32  
1423578\_at 1.01219 "procollagen, type XI, alpha 2" Col11a2  
1423579\_a\_at 1.05767 "transient receptor potential cation channel, subfamily C, member 4" Trpc4  
1423580\_at 0.98320 ankyrin repeat domain 48 /// similar to spermatogenic cell-specific gene 2  
Ankrd48 /// LOC633134  
1423581\_at 1.13142 N-myristoyltransferase 2 Nmt2  
1423582\_at 1.05548 doublesex and mab-3 related transcription factor 1 Dmrt1  
1423583\_at 0.98703 feminization 1 homolog a (C. elegans) Fem1a  
1423584\_at 0.86651 insulin-like growth factor binding protein 7 Igfbp7  
1423585\_at 0.79656 insulin-like growth factor binding protein 7 /// similar to O-acyltransferase  
(membrane bound) domain containing 2 Igfbp7 /// LOC621527  
1423586\_at 1.11796 AXL receptor tyrosine kinase Axl  
1423587\_a\_at 1.00555 exosome component 10 Exosc10  
1423588\_at 1.00504 "actin related protein 2/3 complex, subunit 4" Arpc4  
1423589\_at 0.96059 "actin related protein 2/3 complex, subunit 4" Arpc4  
1423590\_at 0.92117 napsin A aspartic peptidase Napsa  
1423591\_at 0.95973 FGFR1 oncogene partner 2 Fgfr1op2  
1423592\_at 1.19517 Rho-associated coiled-coil containing protein kinase 2 Rock2  
1423593\_a\_at 0.96260 colony stimulating factor 1 receptor Csf1r  
1423594\_a\_at 1.03561 endothelin receptor type B Ednrb  
1423595\_at 0.92338 myc induced nuclear antigen Mina  
1423596\_at 1.18543 NIMA (never in mitosis gene a)-related expressed kinase 6 /// similar to NIMA  
(never in mitosis gene a)-related expressed kinase 6 Nek6 /// LOC674247  
1423597\_at 0.93435 "ATPase, aminophospholipid transporter (APLT), class I, type 8A, member  
1" Atp8a1  
1423598\_at 0.83163 "ATPase, aminophospholipid transporter (APLT), class I, type 8A, member  
1" Atp8a1  
1423599\_a\_at 0.87538 phosducin-like Pdcl  
1423600\_a\_at 1.14108 "Treacher Collins Franceschetti syndrome 1, homolog" Tcof1  
1423601\_s\_at 1.11197 "Treacher Collins Franceschetti syndrome 1, homolog" Tcof1  
1423602\_at 0.90906 Tnf receptor-associated factor 1 Traf1  
1423603\_at 1.19203 "zinc finger protein, multitype 1" Zfp1  
1423604\_at 0.89330 chondroitin sulfate proteoglycan 3 Cspg3  
1423605\_a\_at 1.06022 transformed mouse 3T3 cell double minute 2 Mdm2  
1423606\_at 0.86248 "periostin, osteoblast specific factor" Postn  
1423607\_at 1.04414 lumican Lum

1423608\_at 1.00104 integral membrane protein 2A Itm2a  
 1423609\_a\_at 0.88888 mannoside acetylglucosaminyltransferase 1 Mgat1  
 1423610\_at 1.09171 methionine aminopeptidase 2 Metap2  
 1423611\_at 0.92356 "alkaline phosphatase 2, liver" Akp2  
 1423612\_at 0.95250 expressed sequence AI462438 AI462438  
 1423613\_at 0.98528 --- ---  
 1423614\_at 0.85490 "leucine rich repeat containing 8 family, member C" Lrrc8c  
 1423615\_at 0.98208 zinc finger protein 364 Zfp364  
 1423616\_at 1.01061 TAR (HIV) RNA binding protein 2 Tarbp2  
 1423617\_at 1.00513 component of oligomeric golgi complex 8 Cog8  
 1423618\_at 0.99033 bridging integrator 1 Bin1  
 1423619\_at 0.89622 "RAS, dexamethasone-induced 1" Rasd1  
 1423620\_at 1.01949 centromere protein Q Cenpq  
 1423621\_a\_at 0.93825 "solute carrier family 33 (acetyl-CoA transporter), member 1" Slc33a1  
 1423622\_a\_at 0.91924 cyclin L1 Ccn1  
 1423623\_at 0.95654 RIKEN cDNA 2810021B07 gene 2810021B07Rik  
 1423624\_at 0.94201 "Fanconi anemia, complementation group L" Fanc1  
 1423625\_a\_at 1.07250 "DnaJ (Hsp40) homolog, subfamily C, member 19" Dnajc19  
 1423626\_at 0.95631 dystonin Dst  
 1423627\_at 1.52902 "NAD(P)H dehydrogenase, quinone 1" Nqo1  
 1423628\_s\_at 0.94454 "protocadherin gamma subfamily B, 1 /// protocadherin gamma subfamily B, 2 /// protocadherin gamma subfamily B, 4 /// protocadherin gamma subfamily B, 5 /// protocadherin gamma subfamily B, 6 /// protocadherin gamma subfamily B, 7 /// protocadherin gamma subfamily B, 8 /// protocadherin gamma subfamily C, 3 /// protocadherin gamma subfamily C, 4 /// protocadherin gamma subfamily C, 5 /// protocadherin gamma subfamily A, 1 /// protocadherin gamma subfamily A, 2 /// protocadherin gamma subfamily A, 3 /// protocadherin gamma subfamily A, 4 /// protocadherin gamma subfamily A, 5 /// protocadherin gamma subfamily A, 6 /// protocadherin gamma subfamily A, 7 /// protocadherin gamma subfamily A, 8 /// protocadherin gamma subfamily A, 9 /// protocadherin gamma subfamily A, 10 /// protocadherin gamma subfamily A, 11 /// protocadherin gamma subfamily A, 12" Pcdhgb1 /// Pcdhgb2 /// Pcdhgb4 /// Pcdhgb5 /// Pcdhgb6 /// Pcdhgb7 /// Pcdhgb8 /// Pcdhgc3 /// Pcdhgc4 /// Pcdhgc5 /// Pcdhga1 /// Pcdhga2 /// Pcdhga3 /// Pcdhga4 /// Pcdhga5 /// Pcdhga6 /// Pcdhga7 /// Pcdhga8 /// Pcdhga9 /// Pcdhga10 /// Pcdhga11 /// Pcdhga12  
 1423629\_at 1.05432 dynamin 2 Dnm2  
 1423630\_at 0.94886 cytoglobin Cygb  
 1423631\_at 0.98835 "nuclear receptor subfamily 2, group E, member 3" Nr2e3  
 1423632\_at 1.10816 G protein-coupled receptor 146 Gpr146  
 1423633\_at 1.09086 RIKEN cDNA 6530403A03 gene 6530403A03Rik  
 1423634\_at 1.02526 gasdermin 1 Gsdm1  
 1423635\_at 0.81211 bone morphogenetic protein 2 Bmp2  
 1423636\_at 0.90661 WD repeat domain 31 Wdr31  
 1423637\_at 1.10645 UDP-N-acetyl-alpha-D-galactosamine:polypeptide N-acetylglucosaminyltransferase 4 Galnt4  
 1423638\_at 0.94409 UDP-N-acetyl-alpha-D-galactosamine:polypeptide N-



|                                   |                                                                                                                                                                                              |                                                                            |
|-----------------------------------|----------------------------------------------------------------------------------------------------------------------------------------------------------------------------------------------|----------------------------------------------------------------------------|
| acetylgalactosaminyltransferase 4 | Galnt4                                                                                                                                                                                       |                                                                            |
| 1423639_at                        | 1.00947 histamine receptor H 2                                                                                                                                                               | Hrh2                                                                       |
| 1423640_at                        | 1.01031 synaptoporin                                                                                                                                                                         | Synpr                                                                      |
| 1423641_s_at                      | 0.97490 "CCR4-NOT transcription complex, subunit 7"                                                                                                                                          | Cnot7                                                                      |
| 1423642_at                        | 1.04776 "tubulin, beta 2c"                                                                                                                                                                   | Tubb2c                                                                     |
| 1423643_at                        | 1.13810 DEAD (Asp-Glu-Ala-Asp) box polypeptide 39                                                                                                                                            | Ddx39                                                                      |
| 1423644_at                        | 1.09000 aconitase 1                                                                                                                                                                          | Aco1                                                                       |
| 1423645_a_at                      | 0.88063 DEAD (Asp-Glu-Ala-Asp) box polypeptide 5                                                                                                                                             | Ddx5                                                                       |
| 1423646_at                        | 0.97541 "zinc finger, DHHC domain containing 3"                                                                                                                                              | Zdhhc3                                                                     |
| 1423647_a_at                      | 1.04676 "zinc finger, DHHC domain containing 3"                                                                                                                                              | Zdhhc3                                                                     |
| 1423648_at                        | 0.98069 protein disulfide isomerase associated 6                                                                                                                                             | Pdia6                                                                      |
| 1423649_at                        | 1.00460 transmembrane protein 68                                                                                                                                                             | Tmem68                                                                     |
| 1423650_at                        | 0.92430 ring finger protein 26                                                                                                                                                               | Rnf26                                                                      |
| 1423651_at                        | 0.91234 HESB like domain containing 2                                                                                                                                                        | Hbld2                                                                      |
| 1423652_at                        | 0.88575 HESB like domain containing 2                                                                                                                                                        | Hbld2                                                                      |
| 1423653_at                        | 0.86120 "ATPase, Na+/K+ transporting, alpha 1 polypeptide"                                                                                                                                   | Atp1a1                                                                     |
| 1423654_a_at                      | 1.03496 ring finger protein 4                                                                                                                                                                | Rnf4                                                                       |
| 1423655_a_at                      | 0.90616 RIKEN cDNA 1500010J02 gene                                                                                                                                                           | 1500010J02Rik                                                              |
| 1423656_x_at                      | 0.94808 RIKEN cDNA 1500010J02 gene                                                                                                                                                           | 1500010J02Rik                                                              |
| 1423657_at                        | 0.96230 CDP-diacylglycerol--inositol 3-phosphatidyltransferase (phosphatidylinositol synthase)                                                                                               | Cdpt                                                                       |
| 1423658_at                        | 0.93210 signal peptide peptidase 3                                                                                                                                                           | Spp13                                                                      |
| 1423659_a_at                      | 1.16560 "TBC1 domain family, member 17"                                                                                                                                                      | Tbc1d17                                                                    |
| 1423660_at                        | 1.08851 "CTD (carboxy-terminal domain, RNA polymerase II, polypeptide A) small phosphatase 2"                                                                                                | Ctdsp2                                                                     |
| 1423661_s_at                      | 1.06043 "CTD (carboxy-terminal domain, RNA polymerase II, polypeptide A) small phosphatase 2"                                                                                                | Ctdsp2                                                                     |
| 1423662_at                        | 1.00036 "ATPase, H+ transporting, lysosomal accessory protein 2"                                                                                                                             | Atp6ap2                                                                    |
| 1423663_at                        | 0.98811 folliculin                                                                                                                                                                           | Flcn                                                                       |
| 1423664_at                        | 1.05219 quinoid dihydropteridine reductase                                                                                                                                                   | Qdpr                                                                       |
| 1423665_a_at                      | 1.01183 ribosomal protein L5                                                                                                                                                                 | Rpl5                                                                       |
| 1423666_s_at                      | 1.06578 ribosomal protein L5 /// similar to 60S ribosomal protein L5 | Rpl5 /// LOC382740 /// LOC665407 /// LOC668032 /// LOC672748 /// LOC675821 |
| 1423667_at                        | 0.95989 "methionine adenosyltransferase II, alpha"                                                                                                                                           | Mat2a                                                                      |
| 1423668_at                        | 0.92642 "zinc finger, DHHC domain containing 14"                                                                                                                                             | Zdhhc14                                                                    |
| 1423669_at                        | 0.72693 "procollagen, type I, alpha 1"                                                                                                                                                       | Coll1a1                                                                    |
| 1423670_a_at                      | 1.01830 signal recognition particle receptor ('docking protein')                                                                                                                             | Srpr                                                                       |
| 1423671_at                        | 0.94138 delta/notch-like EGF-related receptor                                                                                                                                                | Dner                                                                       |
| 1423672_at                        | 0.73796 RIKEN cDNA 2510042P03 gene                                                                                                                                                           | 2510042P03Rik                                                              |
| 1423673_at                        | 0.95122 "leucine zipper, down-regulated in cancer 1-like"                                                                                                                                    | Ldoc11                                                                     |
| 1423674_at                        | 1.03018 ubiquitin specific peptidase 1                                                                                                                                                       | Usp1                                                                       |

|              |         |                                                                                  |                    |
|--------------|---------|----------------------------------------------------------------------------------|--------------------|
| 1423675_at   | 0.93482 | ubiquitin specific peptdiase 1                                                   | Usp1               |
| 1423676_at   | 1.00793 | "ATP synthase, H+ transporting, mitochondrial F0 complex, subunit d"             | Atp5h              |
| 1423677_at   | 0.86863 | FK506 binding protein 9                                                          | Fkbp9              |
| 1423678_at   | 0.95421 | cDNA sequence                                                                    | BC017643 BC017643  |
| 1423679_at   | 0.85752 | RIKEN cDNA 2810432L12                                                            | gene 2810432L12Rik |
| 1423680_at   | 1.08579 | fatty acid desaturase 1                                                          | Fads1              |
| 1423681_at   | 1.05838 | RIKEN cDNA 1300018I05                                                            | gene 1300018I05Rik |
| 1423682_a_at | 0.96544 | cell division cycle associated 4                                                 | Cdca4              |
| 1423683_at   | 0.96189 | cell division cycle associated 4                                                 | Cdca4              |
| 1423684_at   | 1.00395 | heterogeneous nuclear ribonucleoprotein K                                        | Hnrpk              |
| 1423685_at   | 1.17502 | alanyl-tRNA synthetase                                                           | Aars               |
| 1423686_a_at | 1.04152 | proline rich 13                                                                  | Prr13              |
| 1423687_a_at | 1.07003 | "mannosidase, alpha, class 2C, member 1"                                         | Man2c1             |
| 1423688_at   | 0.97627 | "mannosidase, alpha, class 2C, member 1"                                         | Man2c1             |
| 1423689_a_at | 0.81500 | "G-protein signalling modulator 1 (AGS3-like, C. elegans)"                       | Gpsm1              |
| 1423690_s_at | 0.93562 | "G-protein signalling modulator 1 (AGS3-like, C. elegans)"                       | Gpsm1              |
| 1423691_x_at | 0.99177 | keratin 8                                                                        | Krt8               |
| 1423692_at   | 1.07262 | "NADH dehydrogenase (ubiquinone) 1 alpha subcomplex, 8"                          | Ndufa8             |
| 1423693_at   | 0.84027 | "elastase 1, pancreatic"                                                         | Ela1               |
| 1423694_at   | 0.96967 | potassium channel tetramerisation domain containing 10                           | Kctd10             |
| 1423695_at   | 0.91012 | "ER degradation enhancer, mannosidase alpha-like 2"                              | Edem2              |
| 1423696_a_at | 1.00350 | "proteasome (prosome, macropain) 26S subunit, non-ATPase, 6"                     | Psm6               |
| 1423697_at   | 1.06203 | "proteasome (prosome, macropain) 26S subunit, non-ATPase, 6"                     | Psm6               |
| 1423698_at   | 0.85856 | "DNA segment, Chr 15, ERATO Doi 785, expressed"                                  | D15Ertd785e        |
| 1423699_at   | 0.89807 | "DNA segment, Chr 15, ERATO Doi 785, expressed"                                  | D15Ertd785e        |
| 1423700_at   | 0.98153 | replication factor C (activator 1) 3                                             | Rfc3               |
| 1423701_at   | 0.98128 | Coenzyme A synthase                                                              | Coasy              |
| 1423702_at   | 0.96053 | "H1 histone family, member 0"                                                    | H1f0               |
| 1423703_at   | 1.07679 | peter pan homolog (Drosophila)                                                   | Ppan               |
| 1423704_at   | 0.96106 | lysophospholipase 3                                                              | Lypla3             |
| 1423705_at   | 1.07295 | RIKEN cDNA 2310057D15                                                            | gene 2310057D15Rik |
| 1423706_a_at | 1.26301 | phosphogluconate dehydrogenase                                                   | Pgd                |
| 1423707_at   | 0.89394 | transmembrane protein 50B                                                        | Tmem50b            |
| 1423708_a_at | 1.05253 | "phenylalanine-tRNA synthetase-like, beta subunit"                               | Farslb             |
| 1423709_s_at | 1.05535 | "phenylalanine-tRNA synthetase-like, beta subunit"                               | Farslb             |
| 1423710_at   | 1.00511 | dihydrolipoamide S-succinyltransferase (E2 component of 2-oxo-glutarate complex) | Dlst               |
| 1423711_at   | 0.95397 | "NADH dehydrogenase (ubiquinone) 1 alpha subcomplex, assembly factor 1"          | Ndufaf1            |
| 1423712_a_at | 1.02371 | glutaminyl-tRNA synthetase                                                       | Qars               |
| 1423713_at   | 0.98329 | "ATP-binding cassette, sub-family B (MDR/TAP), member 8"                         | Abcb8              |
| 1423714_at   | 1.00673 | ASF1 anti-silencing function 1 homolog B (S. cerevisiae)                         | Asf1b              |
| 1423715_a_at | 1.11057 | "neural precursor cell expressed, developmentally down-regulated gene 8"         |                    |

## Nedd8

1423716\_s\_at 0.96048 "ATP synthase, H<sup>+</sup> transporting, mitochondrial F1 complex, delta subunit"

## Atp5d

1423717\_at 0.93053 adenylate kinase 3 Ak3

1423718\_at 0.87184 adenylate kinase 3 Ak3

1423719\_at 1.00968 cDNA sequence U46068 U46068

1423720\_a\_at 1.01247 SAR1 gene homolog A (*S. cerevisiae*) Sar1a

1423721\_at 0.90707 "tropomyosin 1, alpha" Tpm1

1423722\_at 0.96055 transmembrane protein 49 Tmem49

1423723\_s\_at 1.05847 TAR DNA binding protein Tardbp

1423724\_at 0.90263 ZW10 interactor Zwint

1423725\_at 1.02653 plastin 3 (T-isoform) Pls3

1423726\_at 1.17301 vesicle amine transport protein 1 homolog (*T. californica*) Vat1

1423727\_at 0.97774 cornichon homolog (*Drosophila*) Cnih

1423728\_at 0.93037 "eukaryotic translation initiation factor 3, subunit 6 interacting protein"

## Eif3s6ip

1423729\_a\_at 1.02082 RIKEN cDNA 2500002L14 gene 2500002L14Rik

1423730\_at 0.98011 CLPTM1-like Clptm1l

1423731\_at 1.09477 "aldehyde dehydrogenase 16 family, member A1" Aldh16a1

1423732\_at 0.94670 translocating chain-associating membrane protein 1 Tram1

1423733\_a\_at 0.87103 Flt3 interacting zinc finger protein 1 Fiz1

1423734\_at 1.02470 RAS-related C3 botulinum substrate 1 Rac1

1423735\_a\_at 1.09599 WD repeat domain 36 Wdr36

1423736\_a\_at 0.99811 dymeclin Dym

1423737\_at 0.98623 NADH dehydrogenase (ubiquinone) Fe-S protein 3 Ndufs3

1423738\_at 0.96396 oxidase assembly 1-like Oxa1l

1423739\_x\_at 0.89616 amyloid beta (A4) precursor-like protein 2 Aplp2

1423740\_a\_at 0.97394 RNA binding motif protein 10 Rbm10

1423741\_at 0.95811 RNA binding motif protein 10 Rbm10

1423742\_at 1.03939 RNA binding motif protein 10 Rbm10

1423743\_at 0.94552 archain 1 Arcn1

1423744\_x\_at 1.08453 "eukaryotic translation initiation factor 2, subunit 3, structural gene X-linked" Eif2s3x

1423745\_at 1.02341 RIKEN cDNA 1110031B06 gene 1110031B06Rik

1423746\_at 0.90019 thioredoxin domain containing 5 Txndc5

1423747\_a\_at 1.15948 "pyruvate dehydrogenase kinase, isoenzyme 1" Pdk1

1423748\_at 1.28526 "pyruvate dehydrogenase kinase, isoenzyme 1" Pdk1

1423749\_s\_at 1.04256 RAN GTPase activating protein 1 Rangap1

1423750\_a\_at 1.01875 Splicing factor 1 Sf1

1423751\_at 1.10573 splicing factor 1 Sf1

1423752\_at 1.02271 DEAD (Asp-Glu-Ala-Asp) box polypeptide 47 Ddx47

1423753\_at 0.54296 "BMP and activin membrane-bound inhibitor, homolog (*Xenopus laevis*)"

## Bambi

1423754\_at 1.45086 interferon induced transmembrane protein 3 Ifitm3  
1423755\_at 0.95277 "zinc finger, CCHC domain containing 8" Zcchc8  
1423756\_s\_at 0.48289 insulin-like growth factor binding protein 4 Igfbp4  
1423757\_x\_at 0.78559 insulin-like growth factor binding protein 4 Igfbp4  
1423758\_at 1.02389 RIKEN cDNA E430034L04 gene E430034L04Rik  
1423759\_a\_at 1.02016 transmembrane and coiled-coil domains 1 Tmco1  
1423760\_at 1.19661 CD44 antigen Cd44  
1423761\_at 1.03279 RIKEN cDNA 5630401D24 gene 5630401D24Rik  
1423762\_at 0.99354 aarF domain containing kinase 1 Adck1  
1423763\_x\_at 0.92532 Cytotoxic granule-associated RNA binding protein 1 Tia1  
1423764\_s\_at 1.01587 mitochondrial ribosomal protein L37 Mrpl37  
1423765\_at 0.86750 "ATH1, acid trehalase-like 1 (yeast)" Athl1  
1423766\_at 1.01565 PAK1 interacting protein 1 Pak1ip1  
1423767\_at 0.96998 RIKEN cDNA 2810410M20 gene 2810410M20Rik  
1423768\_at 1.18450 unc-93 homolog B1 (C. elegans) Unc93b1  
1423769\_at 0.98192 pentatricopeptide repeat domain 2 Ptdc2  
1423770\_at 0.86623 transmembrane channel-like gene family 6 Tmc6  
1423771\_at 1.05841 "protein kinase C, delta binding protein" Prkcdbp  
1423772\_x\_at 1.05482 "solute carrier family 25 (mitochondrial carrier, adenine nucleotide translocator), member 5" Slc25a5  
1423773\_at 0.98170 GC-rich promoter binding protein 1 Gbbp1  
1423774\_a\_at 0.99156 protein regulator of cytokinesis 1 Prc1  
1423775\_s\_at 0.95222 protein regulator of cytokinesis 1 Prc1  
1423776\_s\_at 0.96052 "TBC1 domain family, member 22a" Tbc1d22a  
1423777\_at 0.71232 ubiquitin specific peptidase 20 Usp20  
1423778\_at 0.77434 ubiquitin specific peptidase 20 Usp20  
1423779\_at 0.96723 coiled-coil-helix-coiled-coil-helix domain containing 6 Chchd6  
1423780\_at 0.87287 3-hydroxyisobutyrate dehydrogenase Hibadh  
1423781\_at 1.09255 amyloid beta precursor protein binding protein 1 Appbp1  
1423782\_at 1.07816 "MOB1, Mps One Binder kinase activator-like 1B (yeast)" Mobk1b  
1423783\_at 1.01776 "torsin family 2, member A" Tor2a  
1423784\_at 1.10671 glycyl-tRNA synthetase Gars  
1423785\_at 1.01216 EGL nine homolog 1 (C. elegans) Egl1  
1423786\_at 0.98074 RIKEN cDNA 8430410A17 gene 8430410A17Rik  
1423787\_at 1.01021 nucleoporin 133 Nup133  
1423788\_at 0.92780 nucleoporin 133 Nup133  
1423789\_at 0.99398 cDNA sequence BC005624 BC005624  
1423790\_at 0.98866 death-associated protein Dap  
1423791\_at 0.95702 IK cytokine Ik  
1423792\_a\_at 0.94168 CKLF-like MARVEL transmembrane domain containing 6 Cmtm6  
1423793\_at 0.92540 "DNA segment, Chr 2, ERATO Doi 391, expressed" D2Ertd391e  
1423794\_at 1.04406 "DNA segment, Chr 2, ERATO Doi 391, expressed" D2Ertd391e  
1423795\_at 1.03731 splicing factor proline/glutamine rich (polypyrimidine tract binding protein

associated) Sfpq  
 1423796\_at 1.10460 splicing factor proline/glutamine rich (polypyrimidine tract binding protein associated) Sfpq  
 1423797\_at 1.19866 acetoacetyl-CoA synthetase Aacs  
 1423798\_a\_at 0.96571 eukaryotic translation initiation factor 1 Eif1  
 1423799\_at 1.02935 eukaryotic translation initiation factor 1 Eif1  
 1423800\_at 1.00841 aspartyl-tRNA synthetase Dars  
 1423801\_a\_at 1.14016 adenine phosphoribosyl transferase Aprt  
 1423802\_at 0.98156 CaM kinase-like vesicle-associated Camkv  
 1423803\_s\_at 1.03665 glioma tumor suppressor candidate region gene 2 Gltscr2  
 1423804\_a\_at 1.45896 isopentenyl-diphosphate delta isomerase Idi1  
 1423805\_at 0.72971 disabled homolog 2 (Drosophila) Dab2  
 1423806\_at 1.03680 integrator complex subunit 4 Ints4  
 1423807\_a\_at 0.95855 calmodulin 2 Calm2  
 1423808\_at 0.94734 WD repeat domain 79 Wdr79  
 1423809\_at 0.85444 transcription factor 19 Tcf19  
 1423810\_at 1.01186 protein phosphatase methylesterase 1 Ppme1  
 1423811\_at 1.09388 "splicing factor 3a, subunit 3" Sf3a3  
 1423812\_s\_at 1.04481 expressed sequence AW146242 AW146242  
 1423813\_at 1.02935 kinesin family member 22 Kif22  
 1423814\_at 0.81907 DEAD (Asp-Glu-Ala-Asp) box polypeptide 41 Ddx41  
 1423815\_at 1.07388 DEAD (Asp-Glu-Ala-Asp) box polypeptide 56 Ddx56  
 1423816\_at 0.88557 CAAX box 1 homolog B (human) Cxx1b  
 1423817\_s\_at 0.96367 RIKEN cDNA 2010315L10 gene 2010315L10Rik  
 1423818\_a\_at 0.93829 ADP-ribosylation factor-like 6 interacting protein 1 Arl6ip1  
 1423819\_s\_at 0.94993 ADP-ribosylation factor-like 6 interacting protein 1 Arl6ip1  
 1423820\_at 1.05378 "elongation factor 1 homolog (ELF1, S. cerevisiae)" Elof1  
 1423821\_at 0.76986 transmembrane protein 168 Tmem168  
 1423822\_a\_at 0.83799 transmembrane protein 168 Tmem168  
 1423823\_at 1.20342 RIKEN cDNA 2610012O22 gene 2610012O22Rik  
 1423824\_at 0.85568 G protein-coupled receptor 177 Gpr177  
 1423825\_at 0.86937 G protein-coupled receptor 177 Gpr177  
 1423826\_at 0.97225 nucleolar complex associated 4 homolog (S. cerevisiae) Noc4l  
 1423827\_s\_at 1.04479 nucleolar complex associated 4 homolog (S. cerevisiae) Noc4l  
 1423828\_at 1.19076 fatty acid synthase Fasn  
 1423829\_at 1.00993 RIKEN cDNA 0910001A06 gene 0910001A06Rik  
 1423830\_a\_at 1.01731 "mesoderm induction early response 1, family member 2" Mier2  
 1423831\_at 0.81411 "protein kinase, AMP-activated, gamma 2 non-catalytic subunit" Prkag2  
 1423832\_at 0.82386 "protein kinase, AMP-activated, gamma 2 non-catalytic subunit" Prkag2  
 1423833\_a\_at 0.89343 brain protein 44 Brp44  
 1423834\_s\_at 0.97591 "golgi associated, gamma adaptin ear containing, ARF binding protein 1" Gga1  
 1423835\_at 0.90645 zinc finger protein 503 Zfp503  
 1423836\_at 0.90619 zinc finger protein 503 Zfp503

1423837\_at 0.92730 RIKEN cDNA 2400003C14 gene 2400003C14Rik  
1423838\_s\_at 0.94847 RIKEN cDNA 2400003C14 gene 2400003C14Rik  
1423839\_a\_at 1.02014 basic transcription factor 3 Btf3  
1423840\_at 1.15908 coiled-coil domain containing 56 Ccdc56  
1423841\_at 0.91743 brix domain containing 2 Bxdc2  
1423842\_a\_at 0.92265 ring finger protein 41 Rnf41  
1423843\_at 1.06249 leucine rich repeat containing 61 Lrrc61  
1423844\_s\_at 0.57999 cystathionine beta-synthase Cbs  
1423845\_at 0.85657 "cold shock domain containing C2, RNA binding" Csdc2  
1423846\_x\_at 0.93589 "tubulin, alpha 2" Tuba2  
1423847\_at 0.94525 RIKEN cDNA 2810406C15 gene 2810406C15Rik  
1423848\_at 1.06409 M phase phosphoprotein 6 Mphosph6  
1423849\_a\_at 1.09606 CDC-like kinase 3 Clk3  
1423850\_at 1.20515 NOL1/NOP2/Sun domain family 2 Nsun2  
1423851\_a\_at 0.94881 transmembrane protein 46 Tmem46  
1423852\_at 1.05911 transmembrane protein 46 Tmem46  
1423853\_at 0.92540 RIKEN cDNA 6330527O06 gene 6330527O06Rik  
1423854\_a\_at 0.37482 "RAS-like, family 11, member B" Rasl11b  
1423855\_x\_at 1.06708 ribosomal protein L17 Rpl17  
1423856\_at 1.12354 popeye domain containing 3 Popdc3  
1423857\_at 1.00505 mitochondrial ribosomal protein L30 Mrpl30  
1423858\_a\_at 1.05247 3-hydroxy-3-methylglutaryl-Coenzyme A synthase 2 Hmgcs2  
1423859\_a\_at 1.32571 prostaglandin D2 synthase (brain) Ptgds  
1423860\_at 1.44704 prostaglandin D2 synthase (brain) Ptgds  
1423861\_at 0.90389 "pleckstrin homology domain containing, family F (with FYVE domain)  
member 2" Plekhf2  
1423862\_at 0.86253 "pleckstrin homology domain containing, family F (with FYVE domain)  
member 2" Plekhf2  
1423863\_at 1.06704 "ATP-binding cassette, sub-family F (GCN20), member 2" Abcf2  
1423864\_at 0.93697 nuclear receptor binding protein Nrbp  
1423865\_at 0.72228 "solute carrier family 44, member 1" Slc44a1  
1423866\_at 1.05086 "serine (or cysteine) peptidase inhibitor, clade A, member 3K" Serpina3k  
1423867\_at 1.06633 "serine (or cysteine) peptidase inhibitor, clade A, member 3K" Serpina3k  
1423868\_at 1.24003 thioredoxin reductase 3 Txnrd3  
1423869\_s\_at 0.91550 thioredoxin reductase 3 Txnrd3  
1423870\_at 1.01830 RIKEN cDNA 2610208M17 gene 2610208M17Rik  
1423871\_at 0.93437 transmembrane protein 63a Tmem63a  
1423872\_a\_at 0.93687 dystroglycan 1 Dag1  
1423873\_at 0.99590 "LSM1 homolog, U6 small nuclear RNA associated (S. cerevisiae)" Lsm1  
1423874\_at 0.96240 WD repeat domain 33 Wdr33  
1423875\_at 1.22968 expressed sequence AI450540 AI450540  
1423876\_at 1.09672 expressed sequence AI450540 AI450540  
1423877\_at 1.02283 "chromatin assembly factor 1, subunit B (p60)" Chaf1b

|              |         |                                                                            |          |               |
|--------------|---------|----------------------------------------------------------------------------|----------|---------------|
| 1423878_at   | 1.07909 | glycophorin C                                                              | Gypc     |               |
| 1423879_at   | 1.02452 | RIKEN cDNA D030056L22                                                      | gene     | D030056L22Rik |
| 1423880_at   | 1.07912 | "DNA segment, Chr 10, Wayne State University 52, expressed"                |          | D10Wsu52e     |
| 1423881_at   | 1.04777 | "SAPS domain family, member 3"                                             | Saps3    |               |
| 1423882_at   | 1.12145 | ring finger and WD repeat domain 3                                         | Rfwd3    |               |
| 1423883_at   | 1.04141 | acyl-CoA synthetase long-chain family member 1                             | Acs11    |               |
| 1423884_at   | 1.12170 | "cirrhosis, autosomal recessive 1A (human)"                                | Cirh1a   |               |
| 1423885_at   | 0.93179 | "laminin, gamma 1"                                                         | Lamc1    |               |
| 1423886_at   | 0.84338 | "laminin, gamma 1"                                                         | Lamc1    |               |
| 1423887_a_at | 0.99647 | RIKEN cDNA 1200003M09                                                      | gene     | 1200003M09Rik |
| 1423888_at   | 1.05474 | RIKEN cDNA 1200003M09                                                      | gene     | 1200003M09Rik |
| 1423889_at   | 0.91236 | similar to hypothetical protein FLJ20010                                   |          | MGC5739       |
| 1423890_x_at | 0.78492 | "ATPase, Na <sup>+</sup> /K <sup>+</sup> transporting, beta 1 polypeptide" |          | Atp1b1        |
| 1423891_at   | 0.86307 | "glutathione S-transferase, theta 3"                                       | Gstt3    |               |
| 1423892_at   | 0.86539 | "amyloid beta (A4) precursor protein-binding, family B, member 1"          |          | Apbb1         |
| 1423893_x_at | 0.88165 | "amyloid beta (A4) precursor protein-binding, family B, member 1"          |          | Apbb1         |
| 1423894_a_at | 0.86926 | DALR anticodon binding domain containing 3                                 | Dalrd3   |               |
| 1423895_a_at | 0.96551 | "CUG triplet repeat, RNA binding protein 2"                                | Cugbp2   |               |
| 1423896_a_at | 0.92484 | ring finger protein 187                                                    | Rnf187   |               |
| 1423897_at   | 0.93990 | ring finger protein 187                                                    | Rnf187   |               |
| 1423898_a_at | 1.06870 | thyroid hormone receptor interactor 12                                     | Trip12   |               |
| 1423899_at   | 0.79017 | thyroid hormone receptor interactor 12                                     | Trip12   |               |
| 1423900_at   | 1.05509 | thyroid hormone receptor interactor 12                                     | Trip12   |               |
| 1423901_at   | 1.05715 | thyroid hormone receptor interactor 12                                     | Trip12   |               |
| 1423902_s_at | 0.82585 | Rho guanine nucleotide exchange factor (GEF) 12                            | Arhgef12 |               |
| 1423903_at   | 1.26269 | poliovirus receptor                                                        | Pvr      |               |
| 1423904_a_at | 1.27019 | poliovirus receptor                                                        | Pvr      |               |
| 1423905_at   | 1.22497 | poliovirus receptor                                                        | Pvr      |               |
| 1423906_at   | 1.02346 | heat shock factor binding protein 1                                        | Hsbp1    |               |
| 1423907_a_at | 1.01300 | NADH dehydrogenase (ubiquinone) Fe-S protein 8                             | Ndufs8   |               |
| 1423908_at   | 1.02623 | NADH dehydrogenase (ubiquinone) Fe-S protein 8                             | Ndufs8   |               |
| 1423909_at   | 1.44486 | RIKEN cDNA 0610011I04                                                      | gene     | 0610011I04Rik |
| 1423910_at   | 1.03685 | "centaurin, gamma 3"                                                       | Centg3   |               |
| 1423911_at   | 0.80497 | "protein phosphatase 2, regulatory subunit B (B56), alpha isoform"         |          | Ppp2r5a       |
| 1423912_at   | 0.99184 | "alveolar soft part sarcoma chromosome region, candidate 1 (human)"        |          | Aspscr1       |
| 1423913_at   | 0.90236 | HECT domain containing 3                                                   | Hectd3   |               |
| 1423914_at   | 0.91525 | RIKEN cDNA C630004H02                                                      | gene     | C630004H02Rik |
| 1423915_at   | 0.83774 | olfactomedin-like 2B                                                       | Olfml2b  |               |
| 1423916_s_at | 0.94285 | myeloid leukemia factor 2                                                  | Mlf2     |               |
| 1423917_a_at | 1.00337 | cortactin                                                                  | Ctnn     |               |
| 1423918_at   | 0.87589 | rhomboid domain containing 1                                               | Rhbdd1   |               |
| 1423919_at   | 0.96146 | cDNA sequence BC023882                                                     |          | BC023882      |

1423920\_at 0.97778 barren homolog (Drosophila) Brn1  
1423921\_at 1.01530 integrator complex subunit 3 Ints3  
1423922\_s\_at 0.96509 integrator complex subunit 3 Ints3  
1423923\_a\_at 0.99764 WD repeat domain 8 Wdr8  
1423924\_s\_at 0.90638 tetraspanin 14 Tspan14  
1423925\_at 1.07182 DEAH (Asp-Glu-Ala-His) box polypeptide 16 Dhx16  
1423926\_at 0.90237 "solute carrier family 39 (metal ion transporter), member 13" Slc39a13  
1423927\_at 0.89691 "solute carrier family 35, member B2" Slc35b2  
1423928\_at 0.96890 phosphoglycerate dehydrogenase like 1 Phgdh1  
1423929\_at 0.94849 phosphoglycerate dehydrogenase like 1 Phgdh1  
1423930\_at 1.04298 anaphase promoting complex subunit 4 Anapc4  
1423931\_s\_at 0.97931 anaphase promoting complex subunit 4 Anapc4  
1423932\_at 0.98778 "CUG triplet repeat, RNA binding protein 1" Cugbp1  
1423933\_a\_at 0.87504 RIKEN cDNA 1600029D21 gene 1600029D21Rik  
1423934\_at 0.92854 --- ---  
1423935\_x\_at 1.04710 keratin 14 Krt14  
1423936\_at 0.99596 potassium channel tetramerisation domain containing 5 Kctd5  
1423937\_at 1.05435 potassium channel tetramerisation domain containing 5 Kctd5  
1423938\_at 0.91490 lethal giant larvae homolog 2 (Drosophila) Llg2  
1423939\_a\_at 0.91875 Yip1 interacting factor homolog A (S. cerevisiae) Yif1a  
1423940\_at 0.98879 Yip1 interacting factor homolog A (S. cerevisiae) Yif1a  
1423941\_at 1.07881 calcium/calmodulin-dependent protein kinase II gamma Camk2g  
1423942\_a\_at 1.12861 calcium/calmodulin-dependent protein kinase II gamma Camk2g  
1423943\_at 1.02731 dihydrouridine synthase 1-like (S. cerevisiae) Dus11  
1423944\_at 0.86526 hemopexin Hpxn  
1423945\_a\_at 0.82762 "protein kinase inhibitor, gamma" Pkig  
1423946\_at 1.10962 PDZ and LIM domain 2 Pdlim2  
1423947\_at 1.29195 RIKEN cDNA 1110008P14 gene 1110008P14Rik  
1423948\_at 1.14013 Bcl2-associated athanogene 2 Bag2  
1423949\_at 1.07107 ubiquitin-conjugating enzyme E2Z (putative) Ube2z  
1423950\_at 0.96874 "potassium voltage-gated channel, shaker-related subfamily, beta member 3"  
Kcnab3  
1423951\_at 0.96300 TM2 domain containing 3 Tm2d3  
1423952\_a\_at 1.10469 keratin 7 Krt7  
1423953\_at 0.86397 CDK5 regulatory subunit associated protein 1-like 1 Cdkal1  
1423954\_at 5.81380 complement component 3 C3  
1423955\_a\_at 0.96805 longevity assurance homolog 2 (S. cerevisiae) Lass2  
1423956\_at 0.93089 stromal membrane-associated protein 1 Smap1  
1423957\_at 1.19762 interferon stimulated exonuclease gene 20-like 1 Isg20l1  
1423958\_a\_at 0.93786 RIKEN cDNA 2900001O04 gene 2900001O04Rik  
1423959\_at 1.26256 ropporin 1-like Ropn11  
1423960\_at 0.97568 membrane bound O-acyltransferase domain containing 5 Mboat5  
1423961\_at 1.10835 WD repeat domain 26 Wdr26



1423962\_at 0.92736 WD repeat domain 26 Wdr26  
1423963\_at 1.01901 WD repeat domain 26 Wdr26  
1423964\_at 1.02099 cleavage and polyadenylation specific factor 3-like Cpsf31  
1423965\_at 0.83126 Cd99 antigen-like 2 Cd99l2  
1423966\_at 0.82280 Cd99 antigen-like 2 Cd99l2  
1423967\_at 0.85861 paralemmin Palm  
1423968\_at 0.97305 "UDP glycosyltransferases 3 family, polypeptide A2" Ugt3a2  
1423969\_at 1.10240 nucleoporin 37 Nup37  
1423970\_at 1.01421 THO complex 3 Thoc3  
1423971\_at 1.09181 THO complex 3 Thoc3  
1423972\_at 1.01102 "electron transferring flavoprotein, alpha polypeptide" EtfA  
1423973\_a\_at 1.06481 ADP-ribosylation factor 3 Arf3  
1423974\_at 0.90995 nuclear mitotic apparatus protein 1 Numa1  
1423975\_s\_at 0.96965 nuclear mitotic apparatus protein 1 Numa1  
1423976\_at 0.94276 RIKEN cDNA 4930453N24 gene 4930453N24Rik  
1423977\_at 1.01822 RIKEN cDNA 4930453N24 gene /// similar to CG13876-PA /// similar to  
CG13876-PA /// similar to CG13876-PA 4930453N24Rik /// LOC667795 /// LOC670686 ///  
LOC676400  
1423978\_at 0.67183 SH3-binding kinase 1 Sbk1  
1423979\_a\_at 0.89380 "solute carrier family 25 (mitochondrial carrier, palmitoylcarnitine transporter),  
member 29" Slc25a29  
1423980\_at 0.84232 "solute carrier family 25 (mitochondrial carrier, palmitoylcarnitine transporter),  
member 29" Slc25a29  
1423981\_x\_at 0.98239 "solute carrier family 25 (mitochondrial carrier, palmitoylcarnitine  
transporter), member 29" Slc25a29  
1423982\_at 1.11498 FUS interacting protein (serine-arginine rich) 1 Fusip1  
1423983\_at 0.82963 seizure related 6 homolog like 2 Sez6l2  
1423984\_a\_at 0.99298 myeloid ecotropic viral integration site-related gene 2 /// similar to Homeobox  
protein Meis3 (Meis1-related protein 2) Mrg2 /// LOC670770  
1423985\_at 0.90372 "guanine nucleotide binding protein (G protein), gamma 5 subunit" Gng5  
1423986\_a\_at 0.93235 scotin gene Scotin  
1423987\_at 0.96027 cell division cycle 26 Cdc26  
1423988\_at 0.95307 adenylate kinase 1 Ak1  
1423989\_at 0.94849 RIKEN cDNA 2210010N04 gene 2210010N04Rik  
1423990\_at 0.92005 "RAB28, member RAS oncogene family" Rab28  
1423991\_at 1.05714 RIKEN cDNA 2610033H07 gene 2610033H07Rik  
1423992\_at 1.06958 GATA zinc finger domain containing 2A Gatad2a  
1423993\_at 1.13971 "ATPase, H+ transporting, lysosomal V1 subunit F" Atp6v1f  
1423994\_at 0.86460 kinesin family member 1B Kif1b  
1423995\_at 0.95601 kinesin family member 1B Kif1b  
1423996\_a\_at 0.90404 "interleukin 4 receptor, alpha" Il4ra  
1423997\_at 1.12257 "cold shock domain containing E1, RNA binding" Csde1  
1423998\_at 0.99175 "general transcription factor IIIC, polypeptide 5" Gtf3c5

1423999\_at 0.86805 v-abl Abelson murine leukemia oncogene 1 Abl1  
1424000\_a\_at 1.04474 ribosomal protein S11 Rps11  
1424001\_at 1.02782 Mki67 (FHA domain) interacting nucleolar phosphoprotein Mki67ip  
1424002\_at 1.02821 phosducin-like 3 Pdc13  
1424003\_at 0.98245 RIKEN cDNA 4930444A02 gene 4930444A02Rik  
1424004\_x\_at 0.81270 RIKEN cDNA 4930444A02 gene 4930444A02Rik  
1424005\_at 0.87663 RIKEN cDNA B230219D22 gene B230219D22Rik  
1424006\_at 0.97374 alanyl-tRNA synthetase domain containing 1 Aarsd1  
1424007\_at 0.88198 growth differentiation factor 10 Gdf10  
1424008\_a\_at 1.07520 RNA binding protein with multiple splicing 2 Rbpms2  
1424009\_at 1.05072 regenerating islet-derived 3 delta Reg3d  
1424010\_at 0.80435 microfibrillar-associated protein 4 Mfap4  
1424011\_at 0.90158 aquaporin 9 Aqp9  
1424012\_at 0.77014 RIKEN cDNA 4930506L13 gene 4930506L13Rik  
1424013\_at 1.10025 eukaryotic translation termination factor 1 Etf1  
1424014\_at 1.09657 RIKEN cDNA 2900092E17 gene 2900092E17Rik  
1424015\_at 0.93522 Rab6 interacting protein 1 Rab6ip1  
1424016\_at 0.84497 RIKEN cDNA 2310007F21 gene 2310007F21Rik  
1424017\_a\_at 0.98165 histidine triad nucleotide binding protein 1 Hint1  
1424018\_at 1.00802 histidine triad nucleotide binding protein 1 Hint1  
1424019\_at 1.08521 nucleolar protein 1 Noll  
1424020\_at 0.95356 ADP-ribosylation factor-like 6 interacting protein 6 /// similar to ADP-  
ribosylation-like factor 6-interacting protein 6 Arl6ip6 /// LOC674449  
1424021\_at 0.90721 similar to ADP-ribosylation-like factor 6-interacting protein 6 LOC674449  
1424022\_at 1.02129 RIKEN cDNA 1700012B18 gene 1700012B18Rik  
1424023\_at 0.95275 ATP binding domain 3 Atpbd3  
1424024\_at 0.93794 multiple coagulation factor deficiency 2 Mcfd2  
1424025\_at 1.01487 cDNA sequence BC013529 BC013529  
1424026\_s\_at 0.91084 cDNA sequence BC013529 BC013529  
1424027\_at 0.90465 paxillin Pxn  
1424028\_at 0.99202 RIKEN cDNA 5830457O10 gene 5830457O10Rik  
1424029\_at 0.75138 TSPY-like 4 Tspyl4  
1424030\_at 0.88219 grainyhead-like 1 (Drosophila) Grhl1  
1424031\_at 0.93957 sorting nexin 11 Snx11  
1424032\_at 1.09741 hydrogen voltage-gated channel 1 Hvcn1  
1424033\_at 0.74190 "splicing factor, arginine/serine-rich 7" Sfrs7  
1424034\_at 1.15373 RAR-related orphan receptor alpha Rora  
1424035\_at 1.14244 RAR-related orphan receptor alpha Rora  
1424036\_at 0.99962 PRP6 pre-mRNA splicing factor 6 homolog (yeast) Prpf6  
1424037\_at 0.88206 "inositol 1,4,5-trisphosphate 3-kinase A" Itpka  
1424038\_a\_at 0.86242 RIKEN cDNA 2310044H10 gene 2310044H10Rik  
1424039\_at 0.84856 transmembrane protein 66 Tmem66  
1424040\_at 0.96212 arginine/proline rich coiled-coil 1 Rprc1

|              |         |                                                                    |               |
|--------------|---------|--------------------------------------------------------------------|---------------|
| 1424041_s_at | 2.25994 | "complement component 1, s subcomponent"                           | C1s           |
| 1424042_at   | 1.05586 | transmembrane protein 5                                            | Tmem5         |
| 1424043_at   | 1.20838 | peptidylprolyl isomerase (cyclophilin)-like 4                      | Ppil4         |
| 1424044_at   | 1.06747 | jumonji domain containing 2B                                       | Jmjd2b        |
| 1424045_at   | 1.06072 | RIKEN cDNA 5730437N04 gene                                         | 5730437N04Rik |
| 1424046_at   | 1.00979 | budding uninhibited by benzimidazoles 1 homolog (S. cerevisiae)    | Bub1          |
| 1424047_at   | 1.04148 | 2-deoxyribose-5-phosphate aldolase homolog (C. elegans)            | Dera          |
| 1424048_a_at | 0.94564 | cytochrome b5 reductase 1                                          | Cyb5r1        |
| 1424049_at   | 0.89099 | leucine rich repeat containing 42                                  | Lrrc42        |
| 1424050_s_at | 0.67295 | fibroblast growth factor receptor 1                                | Fgfr1         |
| 1424051_at   | 0.88595 | "procollagen, type IV, alpha 2"                                    | Col4a2        |
| 1424052_at   | 1.01330 | THAP domain containing 4                                           | Thap4         |
| 1424053_a_at | 0.96259 | transcription factor 25 (basic helix-loop-helix)                   | Tcf25         |
| 1424054_at   | 0.93896 | BTB (POZ) domain containing 2                                      | Btbd2         |
| 1424055_at   | 0.87224 | nuclear receptor coactivator 5                                     | Ncoa5         |
| 1424056_at   | 1.00744 | ubiquitin specific peptidase 48                                    | Usp48         |
| 1424057_at   | 0.98123 | ganglioside-induced differentiation-associated-protein 2           | Gdap2         |
| 1424058_at   | 0.99455 | RIKEN cDNA 1190002C06 gene                                         | 1190002C06Rik |
| 1424059_at   | 0.97549 | suppressor of variegation 4-20 homolog 2 (Drosophila)              | Suv420h2      |
| 1424060_at   | 0.99430 | nei like 3 (E. coli)                                               | Neil3         |
| 1424061_at   | 0.95927 | "mannosidase, beta A, lysosomal-like"                              | Manbal        |
| 1424062_at   | 0.91582 | "ubiquitin-conjugating enzyme E2D 1, UBC4/5 homolog (yeast)"       | Ube2d1        |
| 1424063_at   | 1.04213 | androgen binding protein alpha                                     | Abpa          |
| 1424064_at   | 0.92436 | "RAB1B, member RAS oncogene family"                                | Rab1b         |
| 1424065_at   | 0.90184 | "ER degradation enhancer, mannosidase alpha-like 1"                | Edem1         |
| 1424066_at   | 0.95310 | dihydrouridine synthase 3-like (S. cerevisiae)                     | Dus3l         |
| 1424067_at   | 1.29022 | intercellular adhesion molecule                                    | Icam1         |
| 1424068_at   | 0.87779 | T-cell leukemia translocation altered gene                         | Tcta          |
| 1424069_at   | 0.99961 | N-ethylmaleimide sensitive fusion protein attachment protein gamma | Napg          |
| 1424070_at   | 1.01956 | N-ethylmaleimide sensitive fusion protein attachment protein gamma | Napg          |
| 1424071_s_at | 0.84653 | cDNA sequence BC018507                                             | BC018507      |
| 1424072_at   | 0.96458 | RIKEN cDNA 2010107G23 gene                                         | 2010107G23Rik |
| 1424073_at   | 1.03595 | RIKEN cDNA 5430437P03 gene                                         | 5430437P03Rik |
| 1424074_at   | 0.87607 | basic transcription factor 3-like 4                                | Btf3l4        |
| 1424075_at   | 1.02386 | RIKEN cDNA 9430016H08 gene                                         | 9430016H08Rik |
| 1424076_at   | 1.02017 | glycerophosphodiester phosphodiesterase domain containing 1        | Gdpd1         |
| 1424077_at   | 1.19009 | glycerophosphodiester phosphodiesterase domain containing 1        | Gdpd1         |
| 1424078_s_at | 0.82498 | peroxisomal biogenesis factor 6                                    | Pex6          |
| 1424079_x_at | 0.97104 | RIKEN cDNA 2900073H19 gene                                         | 2900073H19Rik |
| 1424080_at   | 0.97629 | "decapping enzyme, scavenger"                                      | Dcps          |
| 1424081_at   | 1.07985 | polycomb group ring finger 6                                       | Pcgf6         |
| 1424082_at   | 1.04674 | "TBC1 domain family, member 13"                                    | Tbc1d13       |
| 1424083_at   | 0.98829 | ROD1 regulator of differentiation 1 (S. pombe)                     | Rod1          |

1424084\_at 1.05755 ROD1 regulator of differentiation 1 (S. pombe) Rod1  
1424085\_at 0.93413 "NADH dehydrogenase (ubiquinone) 1 alpha subcomplex, 4" Ndufa4  
1424086\_at 0.96837 "DNA segment, Chr 9, University of California at Los Angeles 1" D9Ucla1  
1424087\_at 1.03271 RIKEN cDNA 1810042K04 gene 1810042K04Rik  
1424088\_at 0.96969 melanocyte proliferating gene 1 Myg1  
1424089\_a\_at 0.90531 transcription factor 4 Tcf4  
1424090\_at 1.02497 syndecan binding protein (syntenin) 2 Sdcbp2  
1424091\_at 1.12354 expressed sequence AI449175 AI449175  
1424092\_at 1.07392 erythrocyte protein band 4.1 Epb4.1  
1424093\_x\_at 0.89428 CD151 antigen Cd151  
1424094\_at 1.00892 NIMA (never in mitosis gene a)-related expressed kinase 9 Nek9  
1424095\_at 1.10331 RNA terminal phosphate cyclase domain 1 Rtdc1  
1424096\_at 1.00493 keratin 5 Krt5  
1424097\_at 0.89320 "ELOVL family member 7, elongation of long chain fatty acids (yeast)" Elovl7  
1424098\_at 0.85396 "ELOVL family member 7, elongation of long chain fatty acids (yeast)" Elovl7  
1424099\_at 0.99485 RIKEN cDNA 2310016C16 gene 2310016C16Rik  
1424100\_s\_at 1.10051 cell cycle exit and neuronal differentiation 1 Cend1  
1424101\_at 0.98073 heterogeneous nuclear ribonucleoprotein L Hnrpl  
1424102\_at 1.03527 autophagy-related 4B (yeast) Atg4b  
1424103\_at 0.92961 autophagy-related 4B (yeast) Atg4b  
1424104\_at 1.01141 "SYF2 homolog, RNA splicing factor (S. cerevisiae)" Syf2  
1424105\_a\_at 1.13182 pituitary tumor-transforming 1 Pttg1  
1424106\_at 0.85352 RIKEN cDNA 1200003C05 gene 1200003C05Rik  
1424107\_at 0.95136 kinesin family member 18A Kif18a  
1424108\_at 0.99031 glyoxalase 1 Glo1  
1424109\_a\_at 0.97291 glyoxalase 1 Glo1  
1424110\_a\_at 1.18210 "expressed in non-metastatic cells 1, protein" Nme1  
1424111\_at 0.90622 insulin-like growth factor 2 receptor Igf2r  
1424112\_at 0.88754 insulin-like growth factor 2 receptor Igf2r  
1424113\_at 0.96650 laminin B1 subunit 1 Lamb1-1  
1424114\_s\_at 0.93240 laminin B1 subunit 1 Lamb1-1  
1424115\_at 0.91916 "protein phosphatase 5, catalytic subunit" Ppp5c  
1424116\_x\_at 0.97594 "protein phosphatase 5, catalytic subunit" Ppp5c  
1424117\_at 0.94902 cDNA sequence BC056474 BC056474  
1424118\_a\_at 0.93965 spindle pole body component 25 homolog (S. cerevisiae) Spbc25  
1424119\_at 0.96772 "protein kinase, AMP-activated, beta 1 non-catalytic subunit" Prkab1  
1424120\_at 0.97427 ring finger protein 8 Rnf8  
1424121\_at 0.97764 COMM domain containing 1 Commd1  
1424122\_s\_at 1.02721 COMM domain containing 1 Commd1  
1424123\_at 0.99720 cDNA sequence BC011209 BC011209  
1424124\_at 1.08067 motile sperm domain containing 2 Mospd2  
1424125\_at 1.03314 "potassium channel, subfamily K, member 13" Kcnk13  
1424126\_at 1.08035 aminolevulinic acid synthase 1 Alas1

1424127\_at 0.80959 eyes absent 2 homolog (Drosophila) Eya2  
 1424128\_x\_at 0.98016 aurora kinase B Aurkb  
 1424129\_at 1.11475 major facilitator superfamily domain containing 1 Mfsd1  
 1424130\_a\_at 1.06761 polymerase I and transcript release factor Ptrf  
 1424131\_at 0.86240 "procollagen, type VI, alpha 3 /// similar to alpha 3 type VI collagen isoform 1 precursor" Col6a3 /// LOC674521  
 1424132\_at 1.00650 Harvey rat sarcoma virus oncogene 1 Hras1  
 1424133\_at 0.89371 transmembrane protein 98 Tmem98  
 1424134\_at 0.98416 ring finger and SPRY domain containing 1 Rspry1  
 1424135\_at 0.88560 ring finger and SPRY domain containing 1 Rspry1  
 1424136\_a\_at 1.07247 peptidyl prolyl isomerase H /// similar to peptidyl prolyl isomerase H /// hypothetical protein LOC624822 /// similar to peptidylprolyl isomerase H Ppih /// LOC433064 /// LOC624822 /// LOC665989 /// LOC667598 /// LOC669441 /// LOC670964 /// LOC676493  
 1424137\_at 1.08830 G protein-regulated inducer of neurite outgrowth 1 Gprin1  
 1424138\_at 1.12821 rhomboid family 1 (Drosophila) Rhbdf1  
 1424139\_at 1.00153 RAS-related protein-1a Rap1a  
 1424140\_at 1.23911 "galactose-4-epimerase, UDP" Gale  
 1424141\_at 0.99236 HECT domain containing 1 Hectd1  
 1424142\_at 0.88167 "inhibitor of kappa light polypeptide enhancer in B-cells, kinase complex-associated protein" Ikbkap  
 1424143\_a\_at 0.98332 chromatin licensing and DNA replication factor 1 Cdt1  
 1424144\_at 0.88624 chromatin licensing and DNA replication factor 1 Cdt1  
 1424145\_at 0.96275 proline-rich polypeptide 3 Prr3  
 1424146\_at 0.94934 G protein-coupled receptor 37-like 1 Gpr3711  
 1424147\_at 0.98977 "AHA1, activator of heat shock protein ATPase homolog 1 (yeast)" Ahsa1  
 1424148\_a\_at 1.00578 expressed sequence AW049765 AW049765  
 1424149\_at 1.10810 "non-SMC element 2 homolog (MMS21, S. cerevisiae)" Nsmce2  
 1424150\_at 1.39352 glycerophosphodiester phosphodiesterase domain containing 5 Gdpd5  
 1424151\_at 1.21742 JTV1 gene Jtv1  
 1424152\_at 1.08020 CDNA clone IMAGE:30031514 ---  
 1424153\_s\_at 0.99432 sal-like 4 (Drosophila) Sall4  
 1424154\_a\_at 1.04755 HESB like domain containing 1 Hbld1  
 1424155\_at 0.96048 "fatty acid binding protein 4, adipocyte" Fabp4  
 1424156\_at 1.00718 retinoblastoma-like 1 (p107) Rbl1  
 1424157\_at 0.95078 EH-domain containing 2 /// similar to EH-domain containing 2 Ehd2 /// LOC673251  
 1424158\_at 0.84602 similar to EH-domain containing 2 LOC673251  
 1424159\_at 0.92436 RIKEN cDNA 1300010M03 gene 1300010M03Rik  
 1424160\_at 0.97531 "asparagine-linked glycosylation 5 homolog (yeast, dolichyl-phosphate beta-glucosyltransferase)" Alg5  
 1424161\_at 1.24252 DEAD (Asp-Glu-Ala-Asp) box polypeptide 27 Ddx27

|              |                                                                                                       |               |         |
|--------------|-------------------------------------------------------------------------------------------------------|---------------|---------|
| 1424162_at   | 1.01341 tripartite motif protein 29                                                                   | Trim29        |         |
| 1424163_at   | 1.06920 required for meiotic nuclear division 5 homolog B (S. cerevisiae)                             |               | Rmnd5b  |
| 1424164_at   | 1.18059 mitochondrial ribosomal protein L50                                                           | Mrp150        |         |
| 1424165_a_at | 1.02242 SHANK-associated RH domain interacting protein                                                | Sharpin       |         |
| 1424166_at   | 0.90320 mutS homolog 3 (E. coli)                                                                      | Msh3          |         |
| 1424167_a_at | 0.97580 phosphomannomutase 1                                                                          | Pmm1          |         |
| 1424168_a_at | 0.95654 "capping protein (actin filament) muscle Z-line, beta"                                        | Capzb         |         |
| 1424169_at   | 0.82045 Tax1 (human T-cell leukemia virus type I) binding protein 3                                   |               | Tax1bp3 |
| 1424170_at   | 0.95623 PHD finger protein 5A                                                                         | Phf5a         |         |
| 1424171_a_at | 1.14107 hydroxyacyl glutathione hydrolase                                                             |               | Hagh    |
| 1424172_at   | 1.12980 hydroxyacyl glutathione hydrolase                                                             |               | Hagh    |
| 1424173_at   | 0.94317 transmembrane protein 48                                                                      | Tmem48        |         |
| 1424174_at   | 0.95985 Sh3kbp1 binding protein 1                                                                     | Shkbp1        |         |
| 1424175_at   | 0.89854 thyrotroph embryonic factor                                                                   | Tef           |         |
| 1424176_a_at | 1.00052 annexin A4                                                                                    | Anxa4         |         |
| 1424177_at   | 0.85986 transmembrane protein 38a                                                                     | Tmem38a       |         |
| 1424178_at   | 0.97531 transmembrane protein 38a                                                                     | Tmem38a       |         |
| 1424179_at   | 1.03592 "pleckstrin homology domain containing, family J member 1"                                    |               | Plekhj1 |
| 1424180_a_at | 1.06085 thyroid hormone receptor associated protein 4                                                 | Thrap4        |         |
| 1424181_at   | 1.00276 septin 6                                                                                      | 6-Sep         |         |
| 1424182_at   | 0.91488 acetyl-Coenzyme A acetyltransferase 1                                                         | Acat1         |         |
| 1424183_at   | 0.93028 acetyl-Coenzyme A acetyltransferase 1                                                         | Acat1         |         |
| 1424184_at   | 0.84890 "acyl-Coenzyme A dehydrogenase, very long chain"                                              |               | Acadvl  |
| 1424185_a_at | 1.04550 mortality factor 4 like 1 /// similar to mortality factor 4 like 1 isoform b ///              |               |         |
|              | RIKEN cDNA A730098P11 gene /// similar to mortality factor 4 like 1 /// similar to mortality factor 4 |               |         |
|              | like 1 (predicted) Morf4l1 /// LOC433955 /// A730098P11Rik /// LOC627352 /// LOC635663                |               |         |
| 1424186_at   | 0.96265 coiled-coil domain containing 80                                                              | Ccdc80        |         |
| 1424187_at   | 0.94055 coiled-coil domain containing 80                                                              | Ccdc80        |         |
| 1424188_at   | 1.07576 RAB GTPase activating protein 1                                                               | Rabgap1       |         |
| 1424189_at   | 0.95938 "phosphatidylinositol glycan anchor biosynthesis, class C"                                    |               | Pigc    |
| 1424190_at   | 1.00981 "phosphatidylinositol glycan anchor biosynthesis, class C"                                    |               | Pigc    |
| 1424191_a_at | 0.94577 transmembrane protein 41a                                                                     | Tmem41a       |         |
| 1424192_at   | 0.98794 RIKEN cDNA 1500011H22 gene                                                                    | 1500011H22Rik |         |
| 1424193_at   | 1.09594 "PWP2 (periodic tryptophan protein) homolog, yeast"                                           |               | Pwp2h   |
| 1424194_at   | 1.02797 RCSD domain containing 1                                                                      | Rcsd1         |         |
| 1424195_a_at | 0.84455 inositol polyphosphate-5-phosphatase D                                                        | Inpp5d        |         |
| 1424196_at   | 0.96124 "Yip1 domain family, member 1"                                                                | Yipf1         |         |
| 1424197_s_at | 0.90486 "Fanconi anemia, complementation group E"                                                     |               | Fance   |
| 1424198_at   | 0.92616 "discs, large homolog 5 (Drosophila)"                                                         | Dlg5          |         |
| 1424199_at   | 0.98340 SEH1-like (S. cerevisiae)                                                                     | Seh1l         |         |
| 1424200_s_at | 1.04918 SEH1-like (S. cerevisiae)                                                                     | Seh1l         |         |
| 1424201_a_at | 1.06598 SEH1-like (S. cerevisiae)                                                                     | Seh1l         |         |
| 1424202_at   | 0.98569 SEH1-like (S. cerevisiae)                                                                     | Seh1l         |         |

1424203\_at 1.03538 nicalin homolog (zebrafish) Ncln  
1424204\_at 1.00573 mitochondrial ribosomal protein L13 Mrpl13  
1424205\_at 0.99721 "SWI/SNF related, matrix associated, actin dependent regulator of chromatin, subfamily a, member 5 /// RIKEN cDNA 9230115A19 gene /// similar to SWI/SNF related, matrix associated, actin dependent regulator of chromatin, subfamily a, member 5" Smarca5 /// 9230115A19Rik /// LOC675704  
1424206\_at 1.01670 "SWI/SNF related, matrix associated, actin dependent regulator of chromatin, subfamily a, member 5 /// RIKEN cDNA 9230115A19 gene /// similar to SWI/SNF related, matrix associated, actin dependent regulator of chromatin, subfamily a, member 5" Smarca5 /// 9230115A19Rik /// LOC675704  
1424207\_at 1.01403 "SWI/SNF related, matrix associated, actin dependent regulator of chromatin, subfamily a, member 5 /// RIKEN cDNA 9230115A19 gene /// similar to SWI/SNF related, matrix associated, actin dependent regulator of chromatin, subfamily a, member 5" Smarca5 /// 9230115A19Rik /// LOC675704  
1424208\_at 0.80049 prostaglandin E receptor 4 (subtype EP4) Ptger4  
1424209\_at 0.98737 arginyl-tRNA synthetase-like Rarsl  
1424210\_at 1.01303 "SPFH domain family, member 1" Spfh1  
1424211\_at 1.14379 RIKEN cDNA 5730438N18 gene 5730438N18Rik  
1424212\_at 0.95274 RIKEN cDNA 9430023L20 gene 9430023L20Rik  
1424213\_at 1.02987 UbiA prenyltransferase domain containing 1 Ubiad1  
1424214\_at 0.96265 RIKEN cDNA 9130213B05 gene 9130213B05Rik  
1424215\_at 0.84135 FUN14 domain containing 1 Fundc1  
1424216\_a\_at 0.99354 poly (A) polymerase alpha Papola  
1424217\_at 1.05243 poly (A) polymerase alpha Papola  
1424218\_a\_at 0.94184 cAMP responsive element binding protein 3-like 4 Creb3l4  
1424219\_at 1.03273 mitochondrial rRNA methyltransferase 1 homolog (S. cerevisiae) Mrm1  
1424220\_a\_at 1.08102 porcupine homolog (Drosophila) Porcn  
1424221\_at 0.82058 sushi domain containing 4 Susd4  
1424222\_s\_at 1.12591 RAD23b homolog (S. cerevisiae) Rad23b  
1424223\_at 0.88646 RIKEN cDNA 1700020C11 gene 1700020C11Rik  
1424224\_at 1.00472 ankyrin repeat and SOCS box-containing protein 8 Asb8  
1424225\_at 0.93522 ankyrin repeat and SOCS box-containing protein 8 Asb8  
1424226\_at 1.26427 RIKEN cDNA 9030617O03 gene 9030617O03Rik  
1424227\_at 1.02032 polymerase (RNA) III (DNA directed) polypeptide H Polr3h  
1424228\_at 0.94044 polymerase (RNA) III (DNA directed) polypeptide H Polr3h  
1424229\_at 0.88111 dual-specificity tyrosine-(Y)-phosphorylation regulated kinase 3 Dyrk3  
1424230\_at 1.04291 exocyst complex component 6 Exoc6  
1424231\_s\_at 1.04951 exocyst complex component 6 Exoc6  
1424232\_a\_at 0.88949 cDNA sequence BC025546 BC025546  
1424233\_at 1.02141 mesenchyme homeobox 2 Meox2  
1424234\_s\_at 0.93310 mesenchyme homeobox 2 Meox2  
1424235\_at 1.00726 ORM1-like 2 (S. cerevisiae) Ormdl2  
1424236\_at 1.10719 "TBC1 domain family, member 10b" Tbc1d10b

1424237\_at 1.00922 zinc finger protein 639 Zfp639  
 1424238\_at 0.99424 "sirtuin 7 (silent mating type information regulation 2, homolog) 7 (S. cerevisiae)" Sirt7  
 1424239\_at 0.84458 RIKEN cDNA 2310066E14 gene 2310066E14Rik  
 1424240\_at 0.98797 ADP-ribosylation factor interacting protein 2 Arfip2  
 1424241\_at 1.05153 "solute carrier family 30 (zinc transporter), member 6" Slc30a6  
 1424242\_at 0.85580 "biphenyl hydrolase-like (serine hydrolase, breast epithelial mucin-associated antigen)" Bphl  
 1424243\_at 0.95382 RWD domain containing 4A Rwdd4a  
 1424244\_at 0.98986 RWD domain containing 4A Rwdd4a  
 1424245\_at 0.95726 carboxylesterase 2 /// similar to carboxylesterase 2 Ces2 /// LOC667754  
 1424246\_a\_at 1.00251 testis derived transcript Tes  
 1424247\_at 0.96123 ELKS/RAB6-interacting/CAST family member 1 Erc1  
 1424248\_at 0.94033 "cyclic AMP-regulated phosphoprotein, 21" Arpp21  
 1424249\_a\_at 0.88306 Rho GTPase activating protein 9 Arhgap9  
 1424250\_a\_at 1.07944 Rho guanine nucleotide exchange factor (GEF) 3 Arhgef3  
 1424251\_a\_at 0.96894 heterogeneous nuclear ribonucleoprotein D-like Hnrpdl  
 1424252\_at 0.88314 heterogeneous nuclear ribonucleoprotein D-like Hnrpdl  
 1424253\_at 1.02072 RIKEN cDNA 1810073G14 gene 1810073G14Rik  
 1424254\_at 0.95812 interferon induced transmembrane protein 1 Ifitm1  
 1424255\_at 1.01564 suppressor of Ty 5 homolog (S. cerevisiae) Supt5h  
 1424256\_at 0.97760 retinol dehydrogenase 12 Rdh12  
 1424257\_at 0.99396 cyclin-dependent kinase 7 (homolog of Xenopus MO15 cdk-activating kinase) Cdk7  
 1424258\_at 1.16454 polymerase (RNA) II (DNA directed) polypeptide D Polr2d  
 1424259\_at 0.73132 RIKEN cDNA 2400010G15 gene 2400010G15Rik  
 1424260\_at 1.04392 "solute carrier family 12, member 1" Slc12a1  
 1424261\_at 0.82770 zinc finger protein 672 Zfp672  
 1424262\_at 0.90984 RIKEN cDNA 2810003C17 gene 2810003C17Rik  
 1424263\_at 1.04261 RIKEN cDNA 2810003C17 gene 2810003C17Rik  
 1424264\_at 1.00709 "mediator of RNA polymerase II transcription, subunit 6 homolog (yeast)" Med6  
 1424265\_at 0.91426 N-acetylneuraminatase pyruvate lyase Npl  
 1424266\_s\_at 0.93973 expressed sequence AU018778 AU018778  
 1424267\_at 0.85981 RIKEN cDNA 1810043G02 gene 1810043G02Rik  
 1424268\_at 0.87142 spermine oxidase Smox  
 1424269\_a\_at 0.92992 "myosin, light polypeptide 6, alkali, smooth muscle and non-muscle /// similar to myosin, light polypeptide 6, alkali, smooth muscle and non-muscle /// similar to Myosin light polypeptide 6 (Myosin light chain alkali 3) (Myosin light chain 3) (MLC-3) (LC17) /// similar to Myosin light polypeptide 6 (Myosin light chain alkali 3) (Myosin light chain 3) (MLC-3) (LC17)" Myl6 /// LOC433297 /// LOC667952 /// LOC671953  
 1424270\_at 1.12898 doublecortin and calcium/calmodulin-dependent protein kinase-like 1 Dcamk1l



1424271\_at 1.18420 doublecortin and calcium/calmodulin-dependent protein kinase-like 1  
 Dcamk1l  
 1424272\_at 1.02566 signal transducer and activator of transcription 3 Stat3  
 1424273\_at 0.96258 "cytochrome P450, family 2, subfamily c, polypeptide 70" Cyp2c70  
 1424274\_at 1.12517 vesicle docking protein Vdp  
 1424275\_s\_at 0.96389 tripartite motif-containing 41 Trim41  
 1424276\_at 0.97683 sorting nexin 16 Snx16  
 1424277\_at 1.04884 RIKEN cDNA 1110020L19 gene 1110020L19Rik  
 1424278\_a\_at 1.09373 baculoviral IAP repeat-containing 5 Birc5  
 1424279\_at 1.07865 "fibrinogen, alpha polypeptide" Fga  
 1424280\_at 0.79970 motile sperm domain containing 1 Mospd1  
 1424281\_at 0.96530 ubiquitin-associated protein 2 Ubap2  
 1424282\_at 1.01516 PET112-like (yeast) Pet112l  
 1424283\_at 0.98362 jumping translocation breakpoint Jtb  
 1424284\_at 0.85360 protein-O-mannosyltransferase 1 Pomt1  
 1424285\_s\_at 1.03929 ADP-ribosylation factor-like 6 interacting protein 4 Arl6ip4  
 1424286\_at 0.95544 "protein kinase, X-linked" Prkx  
 1424287\_at 1.04183 "protein kinase, X-linked" Prkx  
 1424288\_at 0.91143 "bin3, bicoid-interacting 3, homolog (Drosophila)" Bcdin3  
 1424289\_at 0.88883 cDNA sequence BC010311 BC010311  
 1424290\_at 0.79232 cDNA sequence BC010311 BC010311  
 1424291\_at 1.06581 nucleoporin 93 Nup93  
 1424292\_at 0.87912 DEP domain containing 1a Depdc1a  
 1424293\_s\_at 1.00250 transmembrane protein 55A Tmem55a  
 1424294\_at 0.99917 "protein phosphatase 4, regulatory subunit 1" Ppp4r1  
 1424295\_at 1.13337 developmental pluripotency-associated 3 Dppa3  
 1424296\_at 0.88143 "glutamate-cysteine ligase, catalytic subunit" Gclc  
 1424297\_at 0.90546 zinc finger protein 282 Zfp282  
 1424298\_at 1.03817 zinc finger protein 282 Zfp282  
 1424299\_at 1.01432 "OMA1 homolog, zinc metallopeptidase (S. cerevisiae)" Oma1  
 1424300\_at 1.15943 gem (nuclear organelle) associated protein 6 Gemin6  
 1424301\_at 0.97432 zinc finger protein 219 Zfp219  
 1424302\_at 0.97716 "leukocyte immunoglobulin-like receptor, subfamily B (with TM and ITIM  
 domains), member 3 /// hypothetical LOC619608" Lilrb3 /// LOC619608  
 1424303\_at 0.97612 DEP domain containing 7 Depdc7  
 1424304\_at 1.12928 two pore segment channel 2 Tpcn2  
 1424305\_at 0.94079 immunoglobulin joining chain Igj  
 1424306\_at 0.98127 "elongation of very long chain fatty acids (FEN1/Elo2, SUR4/Elo3, yeast)-like  
 4" Elovl4  
 1424307\_at 0.94220 Rho GTPase activating protein 1 Arhgap1  
 1424308\_at 0.80786 "solute carrier family 24 (sodium/potassium/calcium exchanger), member 3"  
 Slc24a3  
 1424309\_a\_at 1.05696 molybdenum cofactor synthesis 2 Mocs2

1424310\_at 1.08245 --- ---  
1424311\_at 1.02172 RIKEN cDNA 0710008K08 gene 0710008K08Rik  
1424312\_at 0.99726 adiponectin receptor 1 Adipor1  
1424313\_a\_at 0.95404 NADH dehydrogenase (ubiquinone) Fe-S protein 7 Ndufs7  
1424314\_at 0.99280 PRP3 pre-mRNA processing factor 3 homolog (yeast) Prpf3  
1424315\_at 1.18669 RIKEN cDNA 1110004E09 gene 1110004E09Rik  
1424316\_at 0.96146 "solute carrier family 25 (mitochondrial deoxynucleotide carrier), member 19"  
Slc25a19  
1424317\_at 1.06593 "solute carrier family 25 (mitochondrial deoxynucleotide carrier), member 19"  
Slc25a19  
1424318\_at 0.90980 RIKEN cDNA 1110067D22 gene 1110067D22Rik  
1424319\_at 0.98826 oral cancer overexpressed 1 Oraov1  
1424320\_a\_at 1.02827 Tnf receptor-associated factor 7 Traf7  
1424321\_at 0.94483 replication factor C (activator 1) 4 Rfc4  
1424322\_at 0.92426 apurinic/aprimidinic endonuclease 2 Apex2  
1424323\_at 1.17140 nucleolar complex associated 2 homolog (S. cerevisiae) Noc21  
1424324\_at 1.02841 establishment of cohesion 1 homolog 1 (S. cerevisiae) Esco1  
1424325\_at 1.01093 establishment of cohesion 1 homolog 1 (S. cerevisiae) Esco1  
1424326\_at 1.00468 LEM domain containing 2 Lemd2  
1424327\_at 1.09726 RIKEN cDNA 3200002M19 gene 3200002M19Rik  
1424328\_s\_at 1.04140 RIKEN cDNA 3200002M19 gene 3200002M19Rik  
1424329\_a\_at 0.92452 proline-rich Gla (G-carboxyglutamic acid) polypeptide 2 Prrg2  
1424330\_at 0.99766 SUMO1/sentrin specific peptidase 1 Senp1  
1424331\_at 0.96968 "Rab40c, member RAS oncogene family" Rab40c  
1424332\_at 0.90428 "Rab40c, member RAS oncogene family" Rab40c  
1424333\_at 1.00633 RNA (guanine-9-) methyltransferase domain containing 1 Rg9mtd1  
1424334\_at 0.83636 tetraspanin 17 Tspan17  
1424335\_at 1.06137 phosphopantothenoylcysteine decarboxylase Ppcdc  
1424336\_at 1.14119 phosphopantothenoylcysteine decarboxylase Ppcdc  
1424337\_at 0.99755 sorting nexin 15 Snx15  
1424338\_at 1.07183 "solute carrier family 6 (neurotransmitter transporter, GABA), member 13"  
Slc6a13  
1424339\_at 1.06343 2'-5' oligoadenylate synthetase-like 1 Oas11  
1424340\_at 0.73170 leucine rich repeat containing 48 Lrrc48  
1424341\_s\_at 0.97154 "protocadherin alpha 4 /// protocadherin alpha 6 /// protocadherin alpha 7 ///  
protocadherin alpha 5 /// protocadherin alpha 11 /// protocadherin alpha 10 /// protocadherin alpha 1 ///  
protocadherin alpha 9 /// protocadherin alpha 3 /// protocadherin alpha 12 /// protocadherin alpha 2 ///  
protocadherin alpha 8 /// protocadherin alpha subfamily C, 1 /// protocadherin alpha subfamily C, 2"  
Pcdha4 /// Pcdha6 /// Pcdha7 /// Pcdha5 /// Pcdha11 /// Pcdha10 /// Pcdha1 /// Pcdha9 /// Pcdha3 ///  
Pcdha12 /// Pcdha2 /// Pcdha8 /// Pcdhac1 /// Pcdhac2  
1424342\_at 0.94710 forty-two-three domain containing 1 Fyttl1  
1424343\_a\_at 1.22124 eukaryotic translation initiation factor 1A Eif1a  
1424344\_s\_at 1.14211 eukaryotic translation initiation factor 1A Eif1a

|              |         |                                                              |               |
|--------------|---------|--------------------------------------------------------------|---------------|
| 1424345_s_at | 0.94239 | "ubiquitin-conjugating enzyme E2M (UBC12 homolog, yeast)"    | Ube2m         |
| 1424346_at   | 1.04248 | "protein phosphatase 6, catalytic subunit"                   | Ppp6c         |
| 1424347_at   | 0.90111 | "protein phosphatase 6, catalytic subunit"                   | Ppp6c         |
| 1424348_at   | 0.99534 | RIKEN cDNA 1110007A13 gene                                   | 1110007A13Rik |
| 1424349_a_at | 0.85994 | lysophosphatidylglycerol acyltransferase 1                   | Lpgat1        |
| 1424350_s_at | 0.86211 | lysophosphatidylglycerol acyltransferase 1                   | Lpgat1        |
| 1424351_at   | 1.17855 | WAP four-disulfide core domain 2                             | Wfdc2         |
| 1424352_at   | 0.89880 | "cytochrome P450, family 4, subfamily a, polypeptide 12"     | Cyp4a12       |
| 1424353_at   | 1.15592 | leucine-rich PPR-motif containing                            | Lrpprc        |
| 1424354_at   | 1.03365 | RIKEN cDNA 1110007F12 gene                                   | 1110007F12Rik |
| 1424355_a_at | 1.13707 | "transcriptional regulator, SIN3B (yeast)"                   | Sin3b         |
| 1424356_a_at | 0.98472 | "meteorin, glial cell differentiation regulator-like"        | Metrn1        |
| 1424357_at   | 0.86205 | transmembrane protein 45b                                    | Tmem45b       |
| 1424358_at   | 0.92779 | "ubiquitin-conjugating enzyme E2E 2 (UBC4/5 homolog, yeast)" | Ube2e2        |
| 1424359_at   | 0.81975 | 5-oxoprolinase (ATP-hydrolysing)                             | Oplah         |
| 1424360_at   | 0.96795 | cDNA sequence BC019943                                       | BC019943      |
| 1424361_at   | 0.99540 | cDNA sequence BC019943                                       | BC019943      |
| 1424362_at   | 0.92135 | phosphatidic acid phosphatase type 2 domain containing 3     | Ppapdc3       |
| 1424363_at   | 1.00124 | Mycbp associated protein                                     | Mycbpap       |
| 1424364_a_at | 0.95270 | RIKEN cDNA 1110020P15 gene                                   | 1110020P15Rik |
| 1424365_at   | 0.98549 | RIKEN cDNA 1810037I17 gene                                   | 1810037I17Rik |
| 1424366_at   | 0.93455 | transmembrane protein 15                                     | Tmem15        |
| 1424367_a_at | 0.99881 | homer homolog 2 (Drosophila)                                 | Homer2        |
| 1424368_s_at | 0.99488 | ubiquilin 1                                                  | Ubqln1        |
| 1424369_at   | 0.91523 | "proteasome (prosome, macropain) inhibitor subunit 1"        | Psmf1         |
| 1424370_s_at | 0.99796 | "proteasome (prosome, macropain) inhibitor subunit 1"        | Psmf1         |
| 1424371_at   | 0.75547 | "proteasome (prosome, macropain) inhibitor subunit 1"        | Psmf1         |
| 1424372_at   | 1.06192 | mitochondrial ribosomal protein L32                          | Mrpl32        |
| 1424373_at   | 1.02117 | "armadillo repeat containing, X-linked 3"                    | Armxc3        |
| 1424374_at   | 0.92158 | "GTPase, IMAP family member 4"                               | Gimap4        |
| 1424375_s_at | 1.05814 | "GTPase, IMAP family member 4"                               | Gimap4        |
| 1424376_at   | 0.89252 | CDC42 effector protein (Rho GTPase binding) 1                | Cdc42ep1      |
| 1424377_at   | 1.03282 | similar to ribosomal protein L24-like                        | LOC670726     |
| 1424378_at   | 1.25436 | low density lipoprotein receptor adaptor protein 1           | Ldlrap1       |
| 1424379_at   | 0.89471 | carbonic anhydrase 11                                        | Car11         |
| 1424380_at   | 1.02973 | vacuolar protein sorting 37B (yeast)                         | Vps37b        |
| 1424381_at   | 0.94495 | splicing factor 4                                            | Sf4           |
| 1424382_at   | 0.87897 | "reticulocalbin 3, EF-hand calcium binding domain"           | Rcn3          |
| 1424383_at   | 1.07647 | transmembrane protein 51                                     | Tmem51        |
| 1424384_a_at | 1.14216 | zinc and ring finger 1                                       | Znrf1         |
| 1424385_at   | 1.02329 | ---                                                          | ---           |
| 1424386_at   | 1.11860 | receptor accessory protein 2                                 | Reep2         |
| 1424387_at   | 1.11001 | prolactin-like protein C 3                                   | Prlpc3        |

1424388\_at 0.83844 clusterin associated protein 1 Cluap1  
1424389\_at 1.00568 nucleoporin like 1 Nupl1  
1424390\_at 1.08160 Nucleoporin like 1 Nupl1  
1424391\_at 1.12002 "nardilysin, N-arginine dibasic convertase, NRD convertase 1" Nrd1  
1424392\_at 1.04659 "alcohol dehydrogenase, iron containing, 1" Adhfe1  
1424393\_s\_at 0.93100 "alcohol dehydrogenase, iron containing, 1" Adhfe1  
1424394\_at 0.81194 selenoprotein M Selm  
1424395\_at 0.94635 asparaginase like 1 Asrg11  
1424396\_a\_at 0.96108 asparaginase like 1 Asrg11  
1424397\_at 0.99956 DEAH (Asp-Glu-Ala-His) box polypeptide 36 Dhx36  
1424398\_at 1.12199 DEAH (Asp-Glu-Ala-His) box polypeptide 36 Dhx36  
1424399\_at 0.92644 uridine-cytidine kinase 1 Uck1  
1424400\_a\_at 0.98513 "aldehyde dehydrogenase 1 family, member L1" Aldh111  
1424401\_at 0.97946 "aldehyde dehydrogenase 1 family, member L1" Aldh111  
1424402\_at 1.05179 RUN and FYVE domain containing 3 Rufy3  
1424403\_a\_at 0.97742 RUN and FYVE domain containing 3 Rufy3  
1424404\_at 0.86933 RIKEN cDNA 0610040J01 gene 0610040J01Rik  
1424405\_at 1.02215 MAP3K12 binding inhibitory protein 1 Mbip  
1424406\_at 1.03442 BCL2-like 13 (apoptosis facilitator) Bcl2l13  
1424407\_s\_at 0.94991 chromobox homolog 6 Cbx6  
1424408\_at 0.83583 LIM and senescent cell antigen like domains 2 Lims2  
1424409\_at 0.96794 claudin 23 Cldn23  
1424410\_at 0.83133 tetratricopeptide repeat domain 8 Ttc8  
1424411\_at 0.99354 expressed sequence AI840826 AI840826  
1424412\_at 0.85520 opioid growth factor receptor-like 1 Ogfr11  
1424413\_at 0.98773 opioid growth factor receptor-like 1 Ogfr11  
1424414\_at 0.92845 opioid growth factor receptor-like 1 /// similar to opioid growth factor receptor-like 1 Ogfr11 /// LOC673882  
1424415\_s\_at 0.83608 "spondin 1, (f-spondin) extracellular matrix protein" Spon1  
1424416\_at 0.89389 NFkB inhibitor interacting Ras-like protein 2 Nkiras2  
1424417\_at 1.22008 --- ---  
1424418\_at 0.97160 cDNA sequence BC010801 BC010801  
1424419\_at 0.94678 leucine rich repeat containing 14 Lrrc14  
1424420\_at 0.68085 cell cycle progression 1 Ccpg1  
1424421\_at 0.99788 "RFad1, flavin adenine dinucleotide synthetase, homolog (yeast)" Flad1  
1424422\_s\_at 1.00565 "lens epithelial protein /// RFad1, flavin adenine dinucleotide synthetase, homolog (yeast)" Lenep /// Flad1  
1424423\_at 0.92062 "lens epithelial protein /// RFad1, flavin adenine dinucleotide synthetase, homolog (yeast)" Lenep /// Flad1  
1424424\_at 1.05200 "solute carrier family 39 (zinc transporter), member 1" Slc39a1  
1424425\_a\_at 0.87041 methylthioadenosine phosphorylase Mtap  
1424426\_at 0.91537 methylthioadenosine phosphorylase Mtap  
1424427\_at 0.89491 "transcriptional adaptor 1 (HF11 homolog, yeast) like" Tada11

1424428\_at 1.06096 coiled-coil domain containing 95 Ccdc95  
1424429\_s\_at 1.09267 coiled-coil domain containing 95 Ccdc95  
1424430\_at 1.13598 MTERF domain containing 2 Mterfd2  
1424431\_at 1.00786 chondroitin sulfate GalNAcT-2 Galnact2  
1424432\_at 1.03363 ubiquitin domain containing 1 Ubtd1  
1424433\_at 0.93998 methionine sulfoxide reductase B2 Msrb2  
1424434\_at 1.00700 cDNA sequence BC024814 BC024814  
1424435\_a\_at 1.10908 phosphoribosylglycinamide formyltransferase Gart  
1424436\_at 0.98486 phosphoribosylglycinamide formyltransferase Gart  
1424437\_s\_at 1.07127 "ATP-binding cassette, sub-family G (WHITE), member 4" Abcg4  
1424438\_a\_at 0.85018 leptin receptor overlapping transcript Leprot  
1424439\_at 0.87545 RIKEN cDNA 1810065E05 gene 1810065E05Rik  
1424440\_at 1.08793 mitochondrial ribosomal protein S6 Mrps6  
1424441\_at 0.99322 "solute carrier family 27 (fatty acid transporter), member 4" Slc27a4  
1424442\_a\_at 0.88986 "praja 2, RING-H2 motif containing" Pja2  
1424443\_at 0.86758 "hepatoma-derived growth factor, related protein 3 /// transmembrane 6 superfamily member 1" Hdgfrp3 /// Tm6sf1  
1424444\_a\_at 0.97490 RIKEN cDNA 1600014C10 gene 1600014C10Rik  
1424445\_at 0.96370 transmembrane 4 superfamily member 5 Tm4sf5  
1424446\_at 0.94357 armadillo repeat containing 7 Armc7  
1424447\_at 0.95098 RIKEN cDNA 1700030K09 gene 1700030K09Rik  
1424448\_at 1.14508 tripartite motif protein 6 /// similar to Tripartite motif protein 6 Trim6 /// LOC633467  
1424449\_at 0.86953 fibroblast growth factor receptor substrate 3 Frs3  
1424450\_at 0.84344 "G protein-coupled receptor, family C, group 5, member C" Gprc5c  
1424451\_at 0.67622 acetyl-Coenzyme A acyltransferase 1B Acaa1b  
1424452\_at 1.18217 "SAFB-like, transcription modulator" Sltm  
1424453\_at 0.99864 "phosphate cytidylyltransferase 1, choline, alpha isoform" Pcyt1a  
1424454\_at 0.96567 transmembrane protein 87A Tmem87a  
1424455\_at 0.70583 G protein-coupled receptor associated sorting protein 1 Gprasp1  
1424456\_at 1.11574 poliovirus receptor-related 2 Pvr12  
1424457\_at 0.98692 "amyloid beta (A4) precursor protein-binding, family B, member 3" Apbb3  
1424458\_at 0.91097 jumonji domain containing 2C Jmjd2c  
1424459\_at 0.95440 acyltransferase like 2 Aytl2  
1424460\_s\_at 0.93213 acyltransferase like 2 Aytl2  
1424461\_at 0.94036 dynactin 2 Dctn2  
1424462\_at 1.02020 ERGIC and golgi 2 Ergic2  
1424463\_at 0.79846 RIKEN cDNA 2210010L05 gene 2210010L05Rik  
1424464\_s\_at 0.95045 RIKEN cDNA 2210010L05 gene 2210010L05Rik  
1424465\_at 1.25275 coiled-coil domain containing 58 Ccdc58  
1424466\_at 0.95267 importin 9 Ipo9  
1424467\_at 0.96441 "pleckstrin homology-like domain, family B, member 1" Phldb1  
1424468\_s\_at 0.89317 "pleckstrin homology-like domain, family B, member 1" Phldb1

1424469\_a\_at 0.99815 cleavage and polyadenylation specific factor 4 Cpsf4  
1424470\_a\_at 1.11368 Rap guanine nucleotide exchange factor (GEF) 3 Rapgef3  
1424471\_at 1.22536 Rap guanine nucleotide exchange factor (GEF) 3 Rapgef3  
1424472\_at 0.99919 nucleolar protein family 6 (RNA-associated) Nol6  
1424473\_at 1.01257 polymerase (RNA) II (DNA directed) polypeptide H Polr2h  
1424474\_a\_at 1.08152 "calcium/calmodulin-dependent protein kinase kinase 2, beta" Camkk2  
1424475\_at 1.07546 "calcium/calmodulin-dependent protein kinase kinase 2, beta" Camkk2  
1424476\_at 1.09517 "calcium/calmodulin-dependent protein kinase kinase 2, beta" Camkk2  
1424477\_at 0.95059 cDNA sequence BC019731 BC019731  
1424478\_at 0.97341 Bardet-Biedl syndrome 2 homolog (human) Bbs2  
1424479\_at 0.99917 cystatin 8 (cystatin-related epididymal spermatogenic) Cst8  
1424480\_s\_at 0.95564 thymoma viral proto-oncogene 2 Akt2  
1424481\_s\_at 1.00503 "armadillo repeat containing, X-linked 5" Armcx5  
1424482\_at 1.01320 Rho guanine nucleotide exchange factor (GEF7) Arhgef7  
1424483\_at 1.08558 --- ---  
1424484\_at 0.99726 "MOB1, Mps One Binder kinase activator-like 1B (yeast)" Mobk1b  
1424485\_at 1.02737 angiopoietin-like 3 Angptl3  
1424486\_a\_at 0.90321 thioredoxin reductase 1 Txnrd1  
1424487\_x\_at 0.97962 thioredoxin reductase 1 Txnrd1  
1424488\_a\_at 0.93581 pyrophosphatase (inorganic) 2 Ppa2  
1424489\_a\_at 1.14589 tRNA isopentenyltransferase 1 Trit1  
1424490\_at 1.09817 zinc finger protein 428 Zfp428  
1424491\_at 0.90786 --- ---  
1424492\_at 0.88807 "transient receptor potential cation channel, subfamily C, member 2" Trpc2  
1424493\_s\_at 0.99195 "UDP glycosyltransferases 3 family, polypeptide A1" Ugt3a1  
1424494\_s\_at 0.83715 RIKEN cDNA 2810417J12 gene 2810417J12Rik  
1424495\_a\_at 1.08663 chemokine-like factor Cklf  
1424496\_at 1.06970 RIKEN cDNA 5133401N09 gene 5133401N09Rik  
1424497\_at 0.97456 RIKEN cDNA 1110032O16 gene 1110032O16Rik  
1424498\_at 1.05568 RIKEN cDNA 5730596K20 gene 5730596K20Rik  
1424499\_s\_at 1.06523 RIKEN cDNA 5730596K20 gene 5730596K20Rik  
1424500\_at 1.13882 "UTP6, small subunit (SSU) processome component, homolog (yeast)" Utp6  
1424501\_at 1.04374 "UTP6, small subunit (SSU) processome component, homolog (yeast)" Utp6  
1424502\_at 0.97001 oncoprotein induced transcript 1 Oit1  
1424503\_at 1.00312 "RAB22A, member RAS oncogene family" Rab22a  
1424504\_at 1.00208 "RAB22A, member RAS oncogene family" Rab22a  
1424505\_at 0.93065 RIKEN cDNA 0610042C05 gene 0610042C05Rik  
1424506\_at 0.91247 cDNA sequence BC026432 BC026432  
1424507\_at 1.16612 Ras and Rab interactor 1 Rin1  
1424508\_at 0.95770 tetratricopeptide repeat domain 5 Ttc5  
1424509\_at 1.09239 CD177 antigen Cd177  
1424510\_at 1.26594 nudix (nucleoside diphosphate linked moiety X)-type motif 6 Nudt6  
1424511\_at 1.02610 aurora kinase A Aurka

1424512\_a\_at 1.04741 thioredoxin domain containing 9 Txndc9  
 1424513\_at 1.05434 "ATPase, H<sup>+</sup> transporting, lysosomal V0 subunit A2" Atp6v0a2  
 1424514\_at 1.10780 ring finger protein 126 Rnf126  
 1424515\_at 1.17407 RIKEN cDNA B230354K17 gene B230354K17Rik  
 1424516\_at 1.12569 RIKEN cDNA B230354K17 gene B230354K17Rik  
 1424517\_at 1.03209 coiled-coil domain containing 12 Ccdc12  
 1424518\_at 1.73497 RIKEN cDNA 2310016F22 gene /// cDNA sequence BC020489  
 2310016F22Rik /// BC020489  
 1424519\_at 1.01124 mitochondrial GTPase 1 homolog (S. cerevisiae) Mtg1  
 1424520\_at 1.14661 RIKEN cDNA 2010305A19 gene 2010305A19Rik  
 1424521\_at 0.94913 "zinc finger, AN1 type domain 2B" Zfand2b  
 1424522\_at 1.24004 HEAT repeat containing 1 Heatr1  
 1424523\_at 0.97638 "engulfment and cell motility 1, ced-12 homolog (C. elegans)" Elmo1  
 1424524\_at 0.80223 RIKEN cDNA 1200002N14 gene 1200002N14Rik  
 1424525\_at 1.00548 gastrin releasing peptide Grp  
 1424526\_a\_at 1.02566 "TDP-glucose 4,6-dehydratase" Tgds  
 1424527\_at 0.92791 "protein phosphatase 2, regulatory subunit B, delta isoform" Ppp2r2d  
 1424528\_at 0.86395 cell growth regulator with EF hand domain 1 Cgref1  
 1424529\_s\_at 0.93367 cell growth regulator with EF hand domain 1 Cgref1  
 1424530\_at 0.88160 SEC14-like 2 (S. cerevisiae) Sec14l2  
 1424531\_a\_at 0.71230 "transcription elongation factor A (SII), 3" Tcea3  
 1424532\_at 0.98919 YLP motif containing 1 Ylpm1  
 1424533\_a\_at 0.97983 RIKEN cDNA 3110023B02 gene 3110023B02Rik  
 1424534\_at 1.13555 monocyte to macrophage differentiation-associated 2 Mmd2  
 1424535\_at 0.89333 RIKEN cDNA 4930521E07 gene 4930521E07Rik  
 1424536\_at 0.98301 2'-5' oligoadenylate synthetase 1E Oas1e  
 1424537\_at 1.04866 RIKEN cDNA 1700017G21 gene /// similar to Germ cell-less protein-like 2  
 (mGclh) /// similar to Germ cell-less protein-like 2 (mGclh) /// similar to Germ cell-less protein-like 2  
 (mGclh) /// similar to Germ cell-less protein-like 2 (mGclh) /// similar to Germ cell-less protein-like 2  
 (mGclh) /// similar to Germ cell-less protein-like 2 (mGclh) /// similar to Germ cell-less protein-like 2  
 (mGclh) /// similar to Germ cell-less protein-like 2 (mGclh) /// similar to Germ cell-less protein-like 2  
 (mGclh) 1700017G21Rik /// LOC434724 /// LOC434725 /// LOC627264 /// LOC630022 ///  
 LOC668958 /// LOC668960 /// LOC668963 /// LOC668964 /// LOC672864  
 1424538\_at 1.05886 ubiquitin-like 4 Ubl4  
 1424539\_at 0.93839 ubiquitin-like 4 Ubl4  
 1424540\_at 0.99955 homeodomain interacting protein kinase 1 Hipk1  
 1424541\_at 1.00077 transmembrane protein 70 Tmem70  
 1424542\_at 1.33595 S100 calcium binding protein A4 S100a4  
 1424543\_at 0.91692 non-catalytic region of tyrosine kinase adaptor protein 1 Nck1  
 1424544\_at 0.87220 nuclear receptor binding protein 2 Nrbp2  
 1424545\_at 1.04686 cDNA sequence BC003965 BC003965  
 1424546\_at 0.91595 cDNA sequence BC003965 BC003965  
 1424547\_at 1.03615 carbonic anhydrase 10 Car10

1424548\_at 0.89139 "zinc finger, CCCH-type with G patch domain" Zgpat  
 1424549\_at 1.02413 "degenerative spermatocyte homolog 2 (Drosophila), lipid desaturase" Degs2  
 1424550\_at 0.93439 "zinc finger, FYVE domain containing 27" Zfyve27  
 1424551\_at 0.93893 "zinc finger, FYVE domain containing 27" Zfyve27  
 1424552\_at 0.96212 caspase 8 Casp8  
 1424553\_at 1.05165 "Gup1, glycerol uptake/transporter homolog (yeast)" Gup1  
 1424554\_at 0.96788 "protein phosphatase 1, regulatory (inhibitor) subunit 8" Ppp1r8  
 1424555\_at 0.86184 RIKEN cDNA 9430015G10 gene 9430015G10Rik  
 1424556\_at 0.94427 pyrroline-5-carboxylate reductase 1 Pycr1  
 1424557\_at 0.99253 "zinc finger, CCHC domain containing 9" Zcchc9  
 1424558\_a\_at 1.01437 calcium-binding tyrosine-(Y)-phosphorylation regulated (fibrousheathin 2)  
 Cabyr  
 1424559\_at 0.87104 expressed sequence AW060207 AW060207  
 1424560\_at 0.97401 proline-serine-threonine phosphatase-interacting protein 1 Pstpip1  
 1424561\_at 1.00877 endothelin converting enzyme 2 Ece2  
 1424562\_a\_at 1.00545 "solute carrier family 25 (mitochondrial carrier, adenine nucleotide  
 translocator), member 4" Slc25a4  
 1424563\_at 0.96979 "solute carrier family 25 (mitochondrial carrier, adenine nucleotide  
 translocator), member 4" Slc25a4  
 1424564\_at 0.95686 RIKEN cDNA 2410001C21 gene 2410001C21Rik  
 1424565\_at 0.94872 polymerase (RNA) III (DNA directed) polypeptide D Polr3d  
 1424566\_s\_at 0.95868 polymerase (RNA) III (DNA directed) polypeptide D Polr3d  
 1424567\_at 1.04386 tetraspanin 2 Tspan2  
 1424568\_at 0.98263 tetraspanin 2 Tspan2  
 1424569\_at 1.04533 DEAD (Asp-Glu-Ala-Asp) box polypeptide 46 Ddx46  
 1424570\_at 1.12640 DEAD (Asp-Glu-Ala-Asp) box polypeptide 46 Ddx46  
 1424571\_at 0.96142 DEAD (Asp-Glu-Ala-Asp) box polypeptide 46 Ddx46  
 1424572\_a\_at 0.98845 "H2A histone family, member Y" H2afy  
 1424573\_at 1.03248 transmembrane emp24 protein transport domain containing 5 Tmed5  
 1424574\_at 1.09854 transmembrane emp24 protein transport domain containing 5 Tmed5  
 1424575\_at 0.93764 "RAB, member of RAS oncogene family-like 5" Rabl5  
 1424576\_s\_at 1.06205 "cytochrome P450, family 2, subfamily c, polypeptide 44" Cyp2c44  
 1424577\_at 1.05995 misato homolog 1 (Drosophila) Msto1  
 1424578\_at 0.94808 arrestin domain containing 1 Arrdc1  
 1424579\_at 0.97043 "solute carrier family 35 (UDP-N-acetylglucosamine (UDP-GlcNAc)  
 transporter), member 3" Slc35a3  
 1424580\_at 1.05103 "solute carrier family 35 (UDP-N-acetylglucosamine (UDP-GlcNAc)  
 transporter), member 3" Slc35a3  
 1424581\_at 1.02106 SH3 and cysteine rich domain 2 Stac2  
 1424582\_at 1.07532 multiple substrate lipid kinase /// similar to multi-substrate lipid kinase ///  
 similar to multi-substrate lipid kinase Mulk /// LOC667266 /// LOC672697  
 1424583\_at 1.01593 "FERM, RhoGEF and pleckstrin domain protein 2" Farp2  
 1424584\_a\_at 0.99754 RAN binding protein 10 Ranbp10



1424585\_at 1.03774 RAN binding protein 10 Ranbp10  
1424586\_at 0.85502 EH domain binding protein 1 Ehbp1  
1424587\_at 1.16009 cDNA sequence BC023488 BC023488  
1424588\_at 0.97448 SLIT-ROBO Rho GTPase activating protein 3 Srgap3  
1424589\_s\_at 0.88132 "RNA-binding region (RNP1, RRM) containing 3" Rnpc3  
1424590\_at 0.90037 DEAD (Asp-Glu-Ala-Asp) box polypeptide 19b Ddx19b  
1424591\_at 0.85770 RIKEN cDNA 5830433M19 gene 5830433M19Rik  
1424592\_a\_at 1.12099 deoxyribonuclease I Dnase1  
1424593\_at 0.96199 ecdysoneless homolog (Drosophila) Ecd  
1424594\_at 1.14609 "lectin, galactose binding, soluble 7" Lgals7  
1424595\_at 0.91170 F11 receptor F11r  
1424596\_s\_at 0.74638 LIM and cysteine-rich domains 1 Lmcd1  
1424597\_at 1.00638 open reading frame 19 ORF19  
1424598\_at 0.95560 DEAD (Asp-Glu-Ala-Asp) box polypeptide 6 Ddx6  
1424599\_at 1.37209 fibrinogen-like protein 1 Fgl1  
1424600\_at 1.00249 "amiloride binding protein 1 (amine oxidase, copper-containing)" Abp1  
1424601\_at 0.92072 X-ray repair complementing defective repair in Chinese hamster cells 4 Xrcc4  
1424602\_s\_at 0.88395 X-ray repair complementing defective repair in Chinese hamster cells 4 Xrcc4  
1424603\_at 1.02567 sulfatase modifying factor 1 Sumf1  
1424604\_s\_at 1.00711 sulfatase modifying factor 1 Sumf1  
1424605\_at 1.05693 proprotein convertase subtilisin/kexin type 5 Pcsk5  
1424606\_at 1.07433 complexin 3 Cplx3  
1424607\_a\_at 1.60719 cDNA sequence BC003993 /// hypothetical LOC544818 BC003993 ///  
LOC544818  
1424608\_a\_at 1.18935 basic leucine zipper and W2 domains 2 Bzw2  
1424609\_a\_at 1.76789 cDNA sequence BC003993 /// hypothetical LOC544818 BC003993 ///  
LOC544818  
1424610\_at 1.01209 TruB pseudouridine (psi) synthase homolog 2 (E. coli) Trub2  
1424611\_x\_at 0.97109 TruB pseudouridine (psi) synthase homolog 2 (E. coli) Trub2  
1424612\_at 0.91322 NIPA-like domain containing 2 Npal2  
1424613\_at 0.96592 "G protein-coupled receptor, family C, group 5, member B" Gprc5b  
1424614\_at 0.95176 FGF receptor activating protein 1 Frag1  
1424615\_at 1.04115 FGF receptor activating protein 1 Frag1  
1424616\_s\_at 0.90294 FGF receptor activating protein 1 Frag1  
1424617\_at 1.11692 interferon-induced protein 35 Ifi35  
1424618\_at 1.01250 4-hydroxyphenylpyruvic acid dioxygenase Hpd  
1424619\_at 0.94988 "splicing factor 3b, subunit 4 /// similar to splicing factor 3b, subunit 4  
(predicted) /// similar to splicing factor 3b, subunit 4 (predicted)" Sf3b4 /// LOC634414 /// LOC666113  
1424620\_at 1.12793 "DNA segment, Chr 13, Wayne State University 177, expressed" D13Wsu177e  
1424621\_at 0.94509 EST AA792894 AA792894  
1424622\_at 0.98689 heat shock factor 1 Hsf1  
1424623\_at 1.07231 "serine (or cysteine) peptidase inhibitor, clade B, member 5" Serpinb5  
1424624\_at 0.98028 RIKEN cDNA 2900011O08 gene 2900011O08Rik

1424625\_a\_at 0.77555 DENN/MADD domain containing 1A Dennd1a  
1424626\_at 1.08815 RIKEN cDNA 2010003K11 gene 2010003K11Rik  
1424627\_at 1.11934 cystatin 12 Cst12  
1424628\_a\_at 1.05725 RIKEN cDNA 1500032D16 gene 1500032D16Rik  
1424629\_at 0.89912 breast cancer 1 Brca1  
1424630\_a\_at 0.95383 breast cancer 1 Brca1  
1424631\_a\_at 1.00197 Immunoglobulin heavy chain (gamma polypeptide) Ighg  
1424632\_a\_at 0.81230 "REV3-like, catalytic subunit of DNA polymerase zeta RAD54 like (S. cerevisiae)" Rev3l  
1424633\_at 0.87019 calcium/calmodulin-dependent protein kinase I gamma Camk1g  
1424634\_at 1.00151 transcription elongation factor A (SII)-like 1 Tceal1  
1424635\_at 0.99843 eukaryotic translation elongation factor 1 alpha 1 Eef1a1  
1424636\_at 0.95260 RIKEN cDNA 2610204L23 gene 2610204L23Rik  
1424637\_s\_at 0.96792 RIKEN cDNA 2610204L23 gene 2610204L23Rik  
1424638\_at 1.16762 cyclin-dependent kinase inhibitor 1A (P21) Cdkn1a  
1424639\_a\_at 1.00319 3-hydroxy-3-methylglutaryl-Coenzyme A lyase Hmgcl  
1424640\_at 1.05849 ADP-ribosylation factor-like 8A Arl8a  
1424641\_a\_at 0.89571 THO complex 1 Thoc1  
1424642\_at 1.01318 THO complex 1 Thoc1  
1424643\_at 1.05508 "Treacher Collins Franceschetti syndrome 1, homolog" Tcof1  
1424644\_at 0.94849 tubulin-specific chaperone c Tbcc  
1424645\_at 0.99032 trinucleotide repeat containing 6C Tnrc6c  
1424646\_at 0.91842 uridine-cytidine kinase 1-like 1 Uck1l  
1424647\_at 1.02046 "gamma-aminobutyric acid (GABA-A) receptor, pi" Gabrp  
1424648\_at 1.08269 "RAB, member of RAS oncogene family-like 4" Rabl4  
1424649\_a\_at 0.91144 tetraspanin 8 Tspan8  
1424650\_at 0.91591 protein disulfide isomerase associated 5 Pdia5  
1424651\_at 0.98015 cDNA sequence BC021611 BC021611  
1424652\_at 0.99722 transmembrane protein 166 Tmem166  
1424653\_at 1.04755 similar to Tetraspanin-15 (Tspan-15) (Transmembrane 4 superfamily member 15) (Tetraspan NET-7) LOC669875  
1424654\_at 0.96947 "acid phosphatase 2, lysosomal" Acp2  
1424655\_at 1.03227 "acid phosphatase 2, lysosomal" Acp2  
1424656\_s\_at 0.97937 ubiquitin specific peptidase 19 Usp19  
1424657\_at 1.17614 TAO kinase 1 Taok1  
1424658\_at 1.07314 TAO kinase 1 Taok1  
1424659\_at 1.04373 slit homolog 2 (Drosophila) Slit2  
1424660\_s\_at 0.95052 CREB regulated transcription coactivator 2 Crtc2  
1424661\_at 1.00439 peptidase (mitochondrial processing) alpha Pmpca  
1424662\_at 1.13156 peptidase (mitochondrial processing) alpha Pmpca  
1424663\_at 1.03235 cDNA sequence BC017647 BC017647  
1424664\_at 0.98509 cDNA sequence BC017647 BC017647  
1424665\_at 0.99828 RIKEN cDNA 5430405G24 gene 5430405G24Rik

|              |         |                                                                               |               |
|--------------|---------|-------------------------------------------------------------------------------|---------------|
| 1424666_at   | 1.04256 | RIKEN cDNA 5430405G24 gene                                                    | 5430405G24Rik |
| 1424667_a_at | 0.90940 | cut-like 1 (Drosophila) Cut11                                                 |               |
| 1424668_a_at | 0.88107 | cut-like 1 (Drosophila) Cut11                                                 |               |
| 1424669_at   | 0.93145 | "zinc finger, FYVE domain containing 21"                                      | Zfyve21       |
| 1424670_s_at | 0.97160 | "zinc finger, FYVE domain containing 21"                                      | Zfyve21       |
| 1424671_at   | 1.15093 | "pleckstrin homology domain containing, family F (with FYVE domain) member 1" | Plekhf1       |
| 1424672_at   | 0.86275 | Dmx-like 1                                                                    | Dmx11         |
| 1424673_at   | 1.05803 | "C-type lectin domain family 2, member h"                                     | Clec2h        |
| 1424674_at   | 1.02565 | "solute carrier family 39 (metal ion transporter), member 6"                  | Slc39a6       |
| 1424675_at   | 1.04099 | "solute carrier family 39 (metal ion transporter), member 6"                  | Slc39a6       |
| 1424676_s_at | 1.06480 | SEC14-like 4 ( <i>S. cerevisiae</i> )                                         | Sec1414       |
| 1424677_at   | 0.90049 | "cytochrome P450, family 2, subfamily j, polypeptide 9"                       | Cyp2j9        |
| 1424678_at   | 0.85272 | actin-like 7b                                                                 | Act17b        |
| 1424679_at   | 1.04776 | mab-21-like 1 ( <i>C. elegans</i> )                                           | Mab2111       |
| 1424680_at   | 0.93096 | expressed sequence BB146404                                                   | BB146404      |
| 1424681_a_at | 1.11119 | "proteasome (prosome, macropain) subunit, alpha type 5"                       | Psma5         |
| 1424682_at   | 1.08320 | "ATP binding domain 1 family, member C"                                       | Atpbd1c       |
| 1424683_at   | 1.02825 | RIKEN cDNA 1810015C04 gene                                                    | 1810015C04Rik |
| 1424684_at   | 1.02091 | "RAB5C, member RAS oncogene family"                                           | Rab5c         |
| 1424685_at   | 1.06032 | exosome component 4                                                           | Exosc4        |
| 1424686_at   | 1.08616 | RIKEN cDNA 2700008B19 gene                                                    | 2700008B19Rik |
| 1424687_at   | 0.96481 | RIKEN cDNA 2700008B19 gene                                                    | 2700008B19Rik |
| 1424688_at   | 1.02800 | cAMP responsive element binding protein 3-like 3                              | Creb3l3       |
| 1424689_at   | 0.90702 | "protease, serine, 32"                                                        | Prss32        |
| 1424690_at   | 0.99037 | RIKEN cDNA 5930434B04 gene                                                    | 5930434B04Rik |
| 1424691_at   | 0.84466 | RIKEN cDNA 5930434B04 gene                                                    | 5930434B04Rik |
| 1424692_at   | 0.99731 | RIKEN cDNA 2810055F11 gene                                                    | 2810055F11Rik |
| 1424693_at   | 1.08083 | RIKEN cDNA 4933407N01 gene                                                    | 4933407N01Rik |
| 1424694_at   | 0.53024 | RIKEN cDNA 2010011I20 gene                                                    | 2010011I20Rik |
| 1424695_at   | 0.72375 | RIKEN cDNA 2010011I20 gene                                                    | 2010011I20Rik |
| 1424696_at   | 0.97078 | G protein-coupled receptor 89                                                 | Gpr89         |
| 1424697_at   | 1.30217 | DTW domain containing 1                                                       | Dtwd1         |
| 1424698_s_at | 0.84020 | grancalcin                                                                    | Gca           |
| 1424699_at   | 1.01501 | RIKEN cDNA 4921511K06 gene                                                    | 4921511K06Rik |
| 1424700_at   | 0.92274 | transmembrane protein 38B                                                     | Tmem38b       |
| 1424701_at   | 0.92424 | protocadherin 20                                                              | Pcdh20        |
| 1424702_a_at | 1.11149 | RIKEN cDNA 2410024A21 gene                                                    | 2410024A21Rik |
| 1424703_at   | 1.02565 | HemK methyltransferase family member 1                                        | Hemk1         |
| 1424704_at   | 1.22375 | runt related transcription factor 2                                           | Runx2         |
| 1424705_at   | 0.97000 | "RNA binding motif protein, X-linked 2"                                       | RbmX2         |
| 1424706_at   | 0.88899 | zinc finger protein 51                                                        | Zfp51         |
| 1424707_at   | 0.92638 | transmembrane emp24-like trafficking protein 10 (yeast)                       | Tmed10        |

1424708\_at 1.03205 transmembrane emp24-like trafficking protein 10 (yeast) Tmed10  
 1424709\_at 1.03986 "sterol-C5-desaturase (fungal ERG3, delta-5-desaturase) homolog (S. cerevisae)" Sc5d  
 1424710\_a\_at 0.96771 golgi reassembly stacking protein 2 Gorasp2  
 1424711\_at 1.10157 transmembrane protein 2 Tmem2  
 1424712\_at 1.08105 AT hook containing transcription factor 1 Ahctf1  
 1424713\_at 0.60312 calmodulin-like 4 Calml4  
 1424714\_at 1.10251 "aldolase 3, C isoform" Aldoc  
 1424715\_at 0.80768 "retinol saturase (all trans retinol 13,14 reductase)" Retsat  
 1424716\_at 0.77045 "retinol saturase (all trans retinol 13,14 reductase)" Retsat  
 1424717\_at 1.16444 MIS12 homolog (yeast) Mis12  
 1424718\_at 0.89367 microtubule-associated protein tau Mapt  
 1424719\_a\_at 0.98994 microtubule-associated protein tau Mapt  
 1424720\_at 0.93662 "mannoside acetylglucosaminyltransferase 4, isoenzyme B" Mgat4b  
 1424721\_at 1.03597 microfibrillar-associated protein 3 Mfap3  
 1424722\_at 1.15353 RIKEN cDNA 1300017J02 gene 1300017J02Rik  
 1424723\_s\_at 1.04257 "cleavage stimulation factor, 3' pre-RNA, subunit 3" Cstf3  
 1424724\_a\_at 1.18956 "DNA segment, Chr 16, ERATO Doi 472, expressed" D16Ertd472e  
 1424725\_at 0.92946 "DNA segment, Chr 16, ERATO Doi 472, expressed" D16Ertd472e  
 1424726\_at 1.11340 transmembrane protein 150 Tmem150  
 1424727\_at 1.02440 chemokine (C-C motif) receptor 5 Ccr5  
 1424728\_at 1.13788 cDNA sequence BC011248 BC011248  
 1424729\_at 1.02508 cDNA sequence BC054059 BC054059  
 1424730\_a\_at 0.92932 "solute carrier family 15 (H<sup>+</sup>/peptide transporter), member 2" Slc15a2  
 1424731\_at 1.16206 notchless homolog 1 (Drosophila) Nle1  
 1424732\_s\_at 1.19705 RIKEN cDNA 3110005G23 gene 3110005G23Rik  
 1424733\_at 0.97927 "purinergic receptor P2Y, G-protein coupled, 14" P2ry14  
 1424734\_at 1.08169 RAS protein-specific guanine nucleotide-releasing factor 1 Rasgrf1  
 1424735\_at 1.07174 "solute carrier family 25 (mitochondrial carrier, phosphate carrier), member 25" Slc25a25  
 1424736\_at 1.02203 eukaryotic translation elongation factor 2 Eef2  
 1424737\_at 0.93074 thyroid hormone responsive SPOT14 homolog (Rattus) Thrsp  
 1424738\_at 1.01141 RIKEN cDNA 4932432K03 gene 4932432K03Rik  
 1424739\_at 0.95291 RIKEN cDNA 4932432K03 gene 4932432K03Rik  
 1424740\_at 0.99938 cAMP responsive element binding protein 3 Creb3  
 1424741\_s\_at 0.95706 cAMP responsive element binding protein 3 Creb3  
 1424742\_at 1.08028 --- ---  
 1424743\_at 1.03328 RIKEN cDNA 2610003J06 gene 2610003J06Rik  
 1424744\_at 0.85764 serine dehydratase Sds  
 1424745\_at 1.09083 RIKEN cDNA 2900006B13 gene 2900006B13Rik  
 1424746\_at 0.85071 --- ---  
 1424747\_at 0.80685 Kinesin family member 1C Kif1c  
 1424748\_at 0.82054 UDP-N-acetyl-alpha-D-galactosamine:polypeptide N-

acetylgalactosaminyltransferase 11 Galnt11  
 1424749\_at 0.94881 WD repeat and FYVE domain containing 1 Wdfy1  
 1424750\_at 0.99041 zinc finger and BTB domain containing 1 Zbtb1  
 1424751\_at 0.99635 activator of basal transcription Abt1  
 1424752\_x\_at 1.05727 "zinc finger protein 71, related sequence 1" Zfp71-rs1  
 1424753\_at 0.92842 nudix (nucleoside diphosphate linked moiety X)-type motif 14 Nudt14  
 1424754\_at 0.84795 "membrane-spanning 4-domains, subfamily A, member 7" Ms4a7  
 1424755\_at 0.83427 huntingtin interacting protein 1 Hip1  
 1424756\_at 1.01910 huntingtin interacting protein 1 Hip1  
 1424757\_at 0.82820 cDNA sequence BC018242 BC018242  
 1424758\_s\_at 1.09125 "serine (or cysteine) peptidase inhibitor, clade A (alpha-1 antiproteinase, antitrypsin), member 10" Serpina10  
 1424759\_at 0.95790 arrestin domain containing 4 Arrdc4  
 1424760\_a\_at 1.09319 SET and MYND domain containing 2 Smyd2  
 1424761\_at 0.92581 cDNA sequence BC011487 BC011487  
 1424762\_at 0.87835 C1q and tumor necrosis factor related protein 5 /// membrane-type frizzled-related protein C1qtnf5 /// Mfrp  
 1424763\_at 0.88705 RIKEN cDNA 1700027N10 gene 1700027N10Rik  
 1424764\_at 0.99215 seizure related 6 homolog like Sez6l  
 1424765\_at 1.06610 epidermal growth factor receptor pathway substrate 15-like 1 Eps15l1  
 1424766\_at 0.97636 excision repair cross-complementing rodent repair deficiency complementation group 6 - like Ercc6l  
 1424767\_at 1.14163 cadherin 22 Cdh22  
 1424768\_at 1.06764 caldesmon 1 Cald1  
 1424769\_s\_at 0.93774 caldesmon 1 Cald1  
 1424770\_at 1.04796 caldesmon 1 Cald1  
 1424771\_at 1.13535 "H2A histone family, member J /// similar to H2A histone family, member J isoform 2" H2afj /// LOC632401  
 1424772\_at 1.30113 "H2A histone family, member J /// similar to H2A histone family, member J isoform 2" H2afj /// LOC632401  
 1424773\_at 1.00099 RIKEN cDNA 1110012M11 gene 1110012M11Rik  
 1424774\_s\_at 1.00987 RIKEN cDNA 3230401I01 gene 3230401I01Rik  
 1424775\_at 1.05372 2'-5' oligoadenylate synthetase 1A Oas1a  
 1424776\_a\_at 0.98952 "solute carrier family 25, member 28" Slc25a28  
 1424777\_at 1.05609 WD repeat domain 21 Wdr21  
 1424778\_at 1.05778 "DNA segment, Chr 10, University of California at Los Angeles 1" D10Ucla1  
 1424779\_at 1.14898 "DNA segment, Chr 10, University of California at Los Angeles 1" D10Ucla1  
 1424780\_a\_at 1.06301 "DNA segment, Chr 10, University of California at Los Angeles 1" D10Ucla1  
 1424781\_at 1.14304 "DNA segment, Chr 10, University of California at Los Angeles 1" D10Ucla1

1424782\_at 0.94978 transmembrane protein 77 Tmem77  
 1424783\_a\_at 0.88449 "UDP glucuronosyltransferase 1 family, polypeptide A2 /// UDP  
 glucuronosyltransferase 1 family, polypeptide A6A /// UDP glycosyltransferase 1 family, polypeptide  
 A10 /// UDP glucuronosyltransferase 1 family, polypeptide A7C /// UDP glucuronosyltransferase 1  
 family, polypeptide A5 /// UDP glucuronosyltransferase 1 family, polypeptide A9 /// UDP  
 glucuronosyltransferase 1 family, polypeptide A6B /// UDP glucuronosyltransferase 1 family,  
 polypeptide A1" Ugt1a2 /// Ugt1a6a /// Ugt1a10 /// Ugt1a7c /// Ugt1a5 /// Ugt1a9 /// Ugt1a6b /// Ugt1a1  
 1424784\_at 1.08670 RIKEN cDNA 1700029I01 gene /// similar to zinc finger protein 665 /// similar  
 to zinc finger protein 665 /// similar to zinc finger protein 665 1700029I01Rik /// LOC433791 ///  
 LOC666532 /// LOC671566  
 1424785\_at 0.98958 angiopoietin-like 6 Angptl6  
 1424786\_s\_at 0.90290 WD repeat domain 45 Wdr45  
 1424787\_a\_at 1.02591 nuclear respiratory factor 1 Nrf1  
 1424788\_at 1.24612 cDNA sequence BC021438 BC021438  
 1424789\_at 0.80796 GLI-Kruppel family member HKR2 Hkr2  
 1424790\_at 0.99953 RIKEN cDNA 2900084M01 gene 2900084M01Rik  
 1424791\_a\_at 0.84892 basal cell adhesion molecule Bcam  
 1424792\_at 1.11195 ribonuclease P 40 subunit (human) Rpp40  
 1424793\_a\_at 1.08186 phosphatidylethanolamine binding protein 2 Pbp2  
 1424794\_at 1.07659 ring finger protein 186 Rnf186  
 1424795\_a\_at 0.92410 RIKEN cDNA 1700001O22 gene 1700001O22Rik  
 1424796\_at 0.94179 RIKEN cDNA 1700054N08 gene 1700054N08Rik  
 1424797\_a\_at 0.74461 paired-like homeodomain transcription factor 2 Pitx2  
 1424798\_a\_at 0.93482 a disintegrin and metallopeptidase domain 5 Adam5  
 1424799\_a\_at 1.00646 golgi coiled coil 1 Gcc1  
 1424800\_at 0.84937 enabled homolog (Drosophila) Enah  
 1424801\_at 0.86649 enabled homolog (Drosophila) Enah  
 1424802\_a\_at 0.97219 RIKEN cDNA 3300001P08 gene 3300001P08Rik  
 1424803\_at 1.00521 cDNA sequence BC020002 BC020002  
 1424804\_at 0.95916 cDNA sequence BC020002 BC020002  
 1424805\_a\_at 0.89697 RIKEN cDNA 1110039B18 gene 1110039B18Rik  
 1424806\_s\_at 0.95274 RIKEN cDNA 1110039B18 gene 1110039B18Rik  
 1424807\_at 0.90175 "laminin, alpha 4" Lama4  
 1424808\_at 0.92657 "laminin, alpha 4" Lama4  
 1424809\_at 0.95378 crumbs homolog 3 (Drosophila) Crb3  
 1424810\_at 1.09394 "taspase, threonine aspartase 1" Tasp1  
 1424811\_at 0.98319 camello-like 5 Cml5  
 1424812\_at 0.90142 cDNA sequence BC017158 BC017158  
 1424813\_at 1.06896 expressed sequence AA536717 AA536717  
 1424814\_a\_at 0.91482 Bcl2-like 14 (apoptosis facilitator) Bcl2l14  
 1424815\_at 0.99753 glycogen synthase 2 /// similar to glycogen synthase 2 Gys2 /// LOC633620  
 1424816\_at 0.93997 "cat eye syndrome chromosome region, candidate 5 homolog (human)"  
 Cocr5

|              |         |                                                                                                                                                                                                                                                                                        |                                    |          |
|--------------|---------|----------------------------------------------------------------------------------------------------------------------------------------------------------------------------------------------------------------------------------------------------------------------------------------|------------------------------------|----------|
| 1424817_at   | 0.81466 | sperm flagellar 1                                                                                                                                                                                                                                                                      | Spef1                              |          |
| 1424818_at   | 0.95734 | "asparagine-linked glycosylation 12 homolog (yeast, alpha-1,6-mannosyltransferase)"                                                                                                                                                                                                    | Alg12                              |          |
| 1424819_a_at | 1.08563 | resistance to inhibitors of cholinesterase 8 homolog (C. elegans)                                                                                                                                                                                                                      |                                    | Ric8     |
| 1424820_a_at | 0.79016 | Nedd4 family interacting protein 1                                                                                                                                                                                                                                                     | Ndfip1                             |          |
| 1424821_at   | 0.83731 | Nedd4 family interacting protein 1                                                                                                                                                                                                                                                     | Ndfip1                             |          |
| 1424822_at   | 1.01443 | RIKEN cDNA 9630044O09 gene                                                                                                                                                                                                                                                             | 9630044O09Rik                      |          |
| 1424823_s_at | 1.04526 | RIKEN cDNA 9630044O09 gene                                                                                                                                                                                                                                                             | 9630044O09Rik                      |          |
| 1424824_at   | 0.97632 | RIKEN cDNA 9630044O09 gene                                                                                                                                                                                                                                                             | 9630044O09Rik                      |          |
| 1424825_a_at | 1.08121 | glycosylation dependent cell adhesion molecule 1                                                                                                                                                                                                                                       |                                    | Glycam1  |
| 1424826_s_at | 0.92496 | metastasis suppressor 1                                                                                                                                                                                                                                                                | Mtss1                              |          |
| 1424827_a_at | 0.90525 | "casein kinase 1, alpha 1"                                                                                                                                                                                                                                                             | Csnk1a1                            |          |
| 1424828_a_at | 1.05624 | fumarate hydratase 1                                                                                                                                                                                                                                                                   | Fh1                                |          |
| 1424829_at   | 1.07993 | RIKEN cDNA A830007P12 gene                                                                                                                                                                                                                                                             | A830007P12Rik                      |          |
| 1424830_at   | 1.03673 | cyclin K                                                                                                                                                                                                                                                                               | Ccnk                               |          |
| 1424831_at   | 1.04265 | copine II                                                                                                                                                                                                                                                                              | Cpne2                              |          |
| 1424832_at   | 1.01598 | RIKEN cDNA 4732429D16 gene                                                                                                                                                                                                                                                             | 4732429D16Rik                      |          |
| 1424833_at   | 0.80385 | "inositol 1,4,5-triphosphate receptor 2"                                                                                                                                                                                                                                               | Itpr2                              |          |
| 1424834_s_at | 0.90164 | "inositol 1,4,5-triphosphate receptor 2"                                                                                                                                                                                                                                               | Itpr2                              |          |
| 1424835_at   | 1.05674 | "glutathione S-transferase, mu 4"                                                                                                                                                                                                                                                      | Gstm4                              |          |
| 1424836_a_at | 1.01669 | CLIP associating protein 2                                                                                                                                                                                                                                                             | Clasp2                             |          |
| 1424837_at   | 0.98981 | ring finger protein 113A1                                                                                                                                                                                                                                                              | Rnf113a1                           |          |
| 1424838_at   | 1.03780 | RIKEN cDNA A330049M08 gene                                                                                                                                                                                                                                                             | A330049M08Rik                      |          |
| 1424839_a_at | 0.98145 | "NOL1/NOP2/Sun domain family, member 4"                                                                                                                                                                                                                                                | Nsun4                              |          |
| 1424840_at   | 0.92152 | ribokinase                                                                                                                                                                                                                                                                             | Rbks                               |          |
| 1424841_s_at | 0.88650 | ribokinase                                                                                                                                                                                                                                                                             | Rbks                               |          |
| 1424842_a_at | 0.63184 | Rho GTPase activating protein 24                                                                                                                                                                                                                                                       |                                    | Arhgap24 |
| 1424843_a_at | 1.26431 | growth arrest specific 5                                                                                                                                                                                                                                                               | Gas5                               |          |
| 1424844_at   | 0.92381 | angel homolog 1 (Drosophila)                                                                                                                                                                                                                                                           | Angel1                             |          |
| 1424845_a_at | 1.11214 | centrosomal protein 68                                                                                                                                                                                                                                                                 | Cep68                              |          |
| 1424846_at   | 0.85507 | centrosomal protein 68                                                                                                                                                                                                                                                                 | Cep68                              |          |
| 1424847_at   | 1.06779 | "neurofilament, heavy polypeptide"                                                                                                                                                                                                                                                     | Nefh                               |          |
| 1424848_at   | 0.92359 | "potassium large conductance calcium-activated channel, subfamily M, alpha member 1"                                                                                                                                                                                                   | Kcnma1                             |          |
| 1424849_at   | 1.14397 | WD repeat domain 62                                                                                                                                                                                                                                                                    | Wdr62                              |          |
| 1424850_at   | 0.89511 | mitogen activated protein kinase kinase kinase 1 /// similar to Mitogen-activated protein kinase kinase kinase 1 (MAPK/ERK kinase kinase 1) (MEK kinase 1) (MEKK 1) /// similar to Mitogen-activated protein kinase kinase kinase 1 (MAPK/ERK kinase kinase 1) (MEK kinase 1) (MEKK 1) | Map3k1 /// LOC670493 /// LOC674573 |          |
| 1424851_at   | 0.89585 | coiled-coil-helix-coiled-coil-helix domain containing 5                                                                                                                                                                                                                                | Chchd5                             |          |
| 1424852_at   | 1.10565 | myocyte enhancer factor 2C                                                                                                                                                                                                                                                             | Mef2c                              |          |
| 1424853_s_at | 0.96012 | "cytochrome P450, family 4, subfamily a, polypeptide 10 /// cDNA sequence BC013476"                                                                                                                                                                                                    | Cyp4a10 /// BC013476               |          |

1424854\_at 1.16013 "histone 1, H4i" Hist1h4i  
1424855\_at 0.92877 oleoyl-ACP hydrolase Olah  
1424856\_at 1.06136 "ATPase, Na+/K+ transporting, alpha 3 polypeptide" Atp1a3  
1424857\_a\_at 0.85848 tripartite motif protein 34 /// similar to Tripartite motif protein 34 Trim34 ///  
LOC434218  
1424858\_at 1.17759 L-2-hydroxyglutarate dehydrogenase L2hgdh  
1424859\_at 1.01767 homer homolog 3 (Drosophila) Homer3  
1424860\_at 0.94400 RIKEN cDNA D930016D06 gene D930016D06Rik  
1424861\_at 1.03807 RIKEN cDNA D930016D06 gene D930016D06Rik  
1424862\_s\_at 0.99503 mindbomb homolog 2 (Drosophila) Mib2  
1424863\_a\_at 0.75102 homeodomain interacting protein kinase 2 Hipk2  
1424864\_at 0.84302 homeodomain interacting protein kinase 2 Hipk2  
1424865\_at 0.91784 peptide YY Pyy  
1424866\_at 0.96343 ubiquitin specific peptidase 43 Usp43  
1424867\_a\_at 0.83708 glycine-N-acyltransferase Glyat  
1424868\_at 1.07071 glycine-N-acyltransferase Glyat  
1424869\_at 1.00150 dehydrogenase/reductase (SDR family) member 7B Dhhrs7b  
1424870\_at 1.05623 oxysterol binding protein-like 10 Osbpl10  
1424871\_s\_at 0.98851 RIKEN cDNA 1500031H01 gene 1500031H01Rik  
1424872\_at 1.00499 RIKEN cDNA 2310001H12 gene /// similar to zinc finger protein 709 /// similar  
to zinc finger protein 665 2310001H12Rik /// LOC636362 /// LOC666849  
1424873\_at 0.94431 ring finger protein 2 Rnf2  
1424874\_a\_at 1.07374 polypyrimidine tract binding protein 1 Ptbp1  
1424875\_at 1.06064 "spastic paraplegia 20, spartin (Troyer syndrome) homolog (human)" Spg20  
1424876\_s\_at 1.10428 "spastic paraplegia 20, spartin (Troyer syndrome) homolog (human)" Spg20  
1424877\_a\_at 0.93691 "aminolevulinate, delta-, dehydratase" Alad  
1424878\_at 1.02135 leucine-rich repeats and calponin homology (CH) domain containing 4 Lrch4  
1424879\_at 0.90148 leucine-rich repeats and calponin homology (CH) domain containing 4 Lrch4  
1424880\_at 0.93672 tribbles homolog 1 (Drosophila) Trib1  
1424881\_at 1.06517 tribbles homolog 1 (Drosophila) Trib1  
1424882\_a\_at 0.78623 5'-nucleotidase domain containing 2 Nt5dc2  
1424883\_s\_at 1.07197 "splicing factor, arginine/serine-rich 7" Sfrs7  
1424884\_at 1.04771 F-box and WD-40 domain protein 2 Fbxw2  
1424885\_at 0.76188 kelch domain containing 8A Klhdc8a  
1424886\_at 0.71530 "protein tyrosine phosphatase, receptor type, D" Ptpkd  
1424887\_at 1.07327 kelch domain containing 4 Klhdc4  
1424888\_at 0.86052 membrane-associated ring finger (C3HC4) 2 2-Mar  
1424889\_at 0.98843 nucleoporin like 2 Nupl2  
1424890\_at 0.92659 basenuclin 1 Bnc1  
1424891\_a\_at 1.03137 "ZW10 homolog (Drosophila), centromere/kinetochore protein" Zw10  
1424892\_at 0.88023 zinc finger protein 95 Zfp95  
1424893\_at 2.19071 nuclear distribution gene E-like homolog 1 (A. nidulans) Ndel1  
1424894\_at 0.98055 "RAB13, member RAS oncogene family" Rab13



1424895\_at 1.02023 "G-protein signalling modulator 2 (AGS3-like, *C. elegans*)" Gpsm2  
1424896\_at 0.84096 G protein-coupled receptor 85 Gpr85  
1424897\_at 1.11727 G protein-coupled receptor 85 Gpr85  
1424898\_at 1.07516 "solute carrier family 10 (sodium/bile acid cotransporter family), member 1" Slc10a1  
1424899\_at 1.08488 nicotinamide nucleotide adenylyltransferase 3 Nmnat3  
1424900\_at 0.89798 "solute carrier family 29 (nucleoside transporters), member 4" Slc29a4  
1424901\_at 1.03916 "glucosaminyl (N-acetyl) transferase 3, mucin type" Gcnt3  
1424902\_at 0.81619 plexin domain containing 1 Plxdc1  
1424903\_at 0.95807 "jumonji, AT rich interactive domain 1D (Rbp2 like)" Jarid1d  
1424904\_at 0.91867 RIKEN cDNA 1300010F03 gene 1300010F03Rik  
1424905\_a\_at 0.98540 "solute carrier family 39 (metal ion transporter), member 11" Slc39a11  
1424906\_at 1.02529 PQ loop repeat containing Pqlc3  
1424907\_a\_at 1.04342 "phenylalanine-tRNA synthetase-like, alpha subunit" Farsla  
1424908\_at 1.00397 mitochondrial methionyl-tRNA formyltransferase Mtfmt  
1424909\_at 0.96893 leucine rich repeat containing 46 Lrrc46  
1424910\_at 1.11945 kinesin family member 12 Kif12  
1424911\_a\_at 1.06616 lysozyme-like 4 Lyz14  
1424912\_at 0.98613 "solute carrier family 25 (mitochondrial carrier, peroxisomal membrane protein), member 17" Slc25a17  
1424913\_at 0.99960 RIKEN cDNA 2310044G17 gene 2310044G17Rik  
1424914\_at 0.97607 --- ---  
1424915\_s\_at 1.03594 --- ---  
1424916\_x\_at 1.04723 RIKEN cDNA 8030466O12 gene 8030466O12Rik  
1424917\_a\_at 0.90842 "WD repeat domain, phosphoinositide interacting 1" Wipi1  
1424918\_at 0.81822 "TBC1 domain family, member 19" Tbc1d19  
1424919\_at 0.92069 "v-erb-b2 erythroblastic leukemia viral oncogene homolog 2, neuro/glioblastoma derived oncogene homolog (avian)" Erbb2  
1424920\_at 0.96336 "solute carrier family 37 (glycerol-3-phosphate transporter), member 3" Slc37a3  
1424921\_at 1.45613 bromodomain containing 4 /// bone marrow stromal cell antigen 2 Brd4 /// Bst2  
1424922\_a\_at 1.24310 bromodomain containing 4 Brd4  
1424923\_at 2.95804 "serine (or cysteine) peptidase inhibitor, clade A, member 3G" Serpina3g  
1424924\_at 1.20635 SEC63-like (*S. cerevisiae*) Sec63  
1424925\_at 1.02342 SEC63-like (*S. cerevisiae*) Sec63  
1424926\_at 1.14756 SEC63-like (*S. cerevisiae*) Sec63  
1424927\_at 0.89142 GLI pathogenesis-related 1 (glioma) Glipr1  
1424928\_at 1.12488 RIKEN cDNA 2210018M11 gene 2210018M11Rik  
1424929\_a\_at 1.01091 tripartite motif protein 26 Trim26  
1424930\_s\_at 0.95160 expressed sequence AW544981 AW544981  
1424931\_s\_at 1.08003 "immunoglobulin lambda chain, variable 1" Igl-V1  
1424932\_at 0.96316 epidermal growth factor receptor Egfr  
1424933\_at 1.03583 myosin VC Myo5c  
1424934\_at 0.90805 "UDP glucuronosyltransferase 2 family, polypeptide B1" Ugt2b1

1424935\_at 1.02091 ganglioside-induced differentiation-associated protein 1-like 1 Gdap1l1  
1424936\_a\_at 0.99915 "dynein, axonemal, heavy chain 8" Dnahc8  
1424937\_at 1.08024 RIKEN cDNA 2310076L09 gene 2310076L09Rik  
1424938\_at 1.23377 six transmembrane epithelial antigen of the prostate 1 Steap1  
1424939\_at 0.97640 "ankyrin repeat, SAM and basic leucine zipper domain containing 1" Asz1  
1424940\_s\_at 1.00238 cDNA sequence BC022687 BC022687  
1424941\_at 1.04781 "cDNA sequence, BC016579" BC016579  
1424942\_a\_at 1.17907 myelocytomatosis oncogene Myc  
1424943\_at 0.88785 cDNA sequence BC013476 BC013476  
1424944\_at 0.93988 Purkinje cell protein 2 (L7) Pcp2  
1424945\_at 1.07266 chordin-like 1 Chrdl1  
1424946\_a\_at 1.02246 mitochondrial fission regulator 1 Mtfr1  
1424947\_at 1.08459 dynein cytoplasmic 1 light intermediate chain 1 Dync1li1  
1424948\_x\_at 1.31213 "histocompatibility 2, D region locus 1 /// histocompatibility 2, K1, K region ///  
MHC (A.CA/J(H-2K-f) class I antigen" H2-D1 /// H2-K1 /// LOC56628  
1424949\_at 0.95788 "HECT, UBA and WWE domain containing 1" Huwe1  
1424950\_at 0.97270 SRY-box containing gene 9 Sox9  
1424951\_at 0.75933 BAI1-associated protein 2-like 1 Baiap2l1  
1424952\_at 0.91194 OCIA domain containing 1 Ociad1  
1424953\_at 1.12593 cDNA sequence BC021614 BC021614  
1424954\_a\_at 1.00259 --- ---  
1424955\_at 1.12520 coiled-coil domain containing 5 Ccdc5  
1424956\_at 0.99856 "AT hook, DNA binding motif, containing 1" Ahdc1  
1424957\_at 0.92966 "AT hook, DNA binding motif, containing 1" Ahdc1  
1424958\_at 1.06884 carbonic anhydrase 8 Car8  
1424959\_at 1.00215 annexin A13 Anxa13  
1424960\_at 0.89499 epsin 3 Epn3  
1424961\_at 1.08677 TAP binding protein-like Tapbpl  
1424962\_at 0.84273 transmembrane 4 superfamily member 4 Tm4sf4  
1424963\_at 1.00923 retinitis pigmentosa 1 homolog (human) Rp1h  
1424964\_at 0.91939 retinitis pigmentosa 1 homolog (human) Rp1h  
1424965\_at 1.00130 leupaxin Lpxn  
1424966\_at 1.12467 transmembrane protein 40 Tmem40  
1424967\_x\_at 0.82839 "troponin T2, cardiac" Tnnt2  
1424968\_at 0.95667 RIKEN cDNA 2210023G05 gene 2210023G05Rik  
1424969\_s\_at 0.97718 --- ---  
1424970\_at 0.74832 purine-rich element binding protein G Purg  
1424971\_at 0.96845 coiled-coil domain containing 99 Ccdc99  
1424972\_at 1.07636 --- ---  
1424973\_at 0.94542 "cytochrome P450, family 3, subfamily a, polypeptide 25 /// similar to  
cytochrome P450, family 3, subfamily a, polypeptide 25" Cyp3a25 /// LOC622249  
1424974\_at 1.07369 zinc finger protein 418 Zfp418  
1424975\_at 0.98173 sialic acid binding Ig-like lectin F Siglecf

1424976\_at 1.10706 "ras homolog gene family, member V" Rhov  
1424977\_at 1.01062 RIKEN cDNA 4930418G15 gene 4930418G15Rik  
1424978\_at 0.99937 outer dense fiber of sperm tails 4 Odf4  
1424979\_at 1.11204 anterior pharynx defective 1a homolog (C. elegans) Aph1a  
1424980\_s\_at 0.94515 anterior pharynx defective 1a homolog (C. elegans) Aph1a  
1424981\_at 1.29216 neurolysin (metallopeptidase M3 family) Nln  
1424982\_a\_at 1.04744 RIKEN cDNA 2700078E11 gene 2700078E11Rik  
1424983\_a\_at 1.00870 RIKEN cDNA 2700078E11 gene 2700078E11Rik  
1424984\_at 0.99685 RIKEN cDNA 2700078E11 gene 2700078E11Rik  
1424985\_a\_at 1.03952 SRY-box containing gene 10 Sox10  
1424986\_s\_at 1.09959 "F-box and WD-40 domain protein 7, archipelago homolog (Drosophila)"  
Fbxw7  
1424987\_at 1.01457 RIKEN cDNA 5430435G22 gene 5430435G22Rik  
1424988\_at 1.01727 myosin regulatory light chain interacting protein Mylip  
1424989\_at 1.01067 transmembrane protein 142A Tmem142a  
1424990\_at 1.07709 transmembrane protein 142A Tmem142a  
1424991\_s\_at 1.01613 "thymidylate synthase /// thymidylate synthase, pseudogene" Tyms /// Tyms-  
ps  
1424992\_at 1.22854 Tp53rk binding protein Tprkb  
1424993\_at 0.95589 RIKEN cDNA 8430410K20 gene 8430410K20Rik  
1424994\_at 1.06019 RIKEN cDNA 6230410P16 gene 6230410P16Rik  
1424995\_at 0.94176 RIKEN cDNA 6230410P16 gene 6230410P16Rik  
1424996\_at 1.04763 CASP8 and FADD-like apoptosis regulator Cflar  
1424997\_at 0.98614 "splicing factor, arginine/serine-rich 8" Sfrs8  
1424998\_at 0.93592 "EGF-like module containing, mucin-like, hormone receptor-like sequence  
4" Emr4  
1424999\_at 1.17632 RIKEN cDNA 1700022C21 gene 1700022C21Rik  
1425000\_s\_at 1.03917 RIKEN cDNA 5430407P10 gene 5430407P10Rik  
1425001\_at 0.72631 ring finger protein 146 Rnf146  
1425002\_at 0.99027 cDNA sequence BC010462 BC010462  
1425003\_at 0.93118 urocanase domain containing 1 Uroc1  
1425004\_s\_at 1.00647 molybdenum cofactor synthesis 1 Mocs1  
1425005\_at 0.88941 "killer cell lectin-like receptor subfamily C, member 1 /// killer cell lectin-like  
receptor subfamily C, member 2" Klrc1 /// Klrc2  
1425006\_a\_at 1.08615 vaccinia related kinase 1 Vrk1  
1425007\_at 1.12512 zinc finger protein 566 Zfp566  
1425008\_a\_at 1.04506 interferon activated gene 203 Ifi203  
1425009\_at 1.09893 t-complex-associated testis expressed 2 Tcte2  
1425010\_at 1.07314 zinc finger protein 119 Zfp119  
1425011\_x\_at 0.96544 syntaxin 18 Stx18  
1425012\_at 0.94918 "guanine nucleotide binding protein (G protein), gamma 5 subunit ///  
hypothetical protein LOC668891 /// similar to guanine nucleotide binding protein (G protein), gamma 5  
subunit" Gng5 /// LOC668891 /// LOC671715

1425013\_at 1.02294 "solute carrier family 25 (mitochondrial carrier, ornithine transporter) member 2" Slc25a2  
 1425014\_at 1.00905 "nuclear receptor subfamily 2, group C, member 2" Nr2c2  
 1425015\_at 0.78073 Eph receptor B2 Ephb2  
 1425016\_at 0.72821 Eph receptor B2 Ephb2  
 1425017\_at 0.97425 "protocadherin alpha subfamily C, 1" Pcdhac1  
 1425018\_at 1.15542 malignant T cell amplified sequence 1 Mcts1  
 1425019\_at 0.93984 UBX domain containing 4 Ubx4  
 1425020\_at 1.00234 UBX domain containing 4 /// similar to UBX domain containing 4 /// similar to UBX domain containing 4 Ubx4 /// LOC621629 /// LOC637151  
 1425021\_a\_at 0.86701 peroxisome biogenesis factor 16 Pex16  
 1425022\_at 0.96722 ubiquitin specific peptidase 3 Usp3  
 1425023\_at 0.91116 ubiquitin specific peptidase 3 Usp3  
 1425024\_at 0.81466 RIKEN cDNA E430018J23 gene E430018J23Rik  
 1425025\_at 1.03160 transmembrane protein 106A Tmem106a  
 1425026\_at 0.97261 SFT2 domain containing 2 Sft2d2  
 1425027\_s\_at 1.09768 SFT2 domain containing 2 Sft2d2  
 1425028\_a\_at 0.81754 "tropomyosin 2, beta" Tpm2  
 1425029\_a\_at 0.94286 membrane bound O-acyltransferase domain containing 2 Mboat2  
 1425030\_at 1.06069 zinc finger protein 622 Zfp622  
 1425031\_at 0.96030 Fukuyama type congenital muscular dystrophy homolog (human) Fcmd  
 1425032\_at 1.05596 androgen binding protein beta Abpb  
 1425033\_at 1.01291 "solute carrier family 17 (sodium phosphate), member 2" Slc17a2  
 1425034\_at 1.15649 "solute carrier family 17 (sodium phosphate), member 2" Slc17a2  
 1425035\_s\_at 0.98765 DNA (cytosine-5-)-methyltransferase 3-like Dnmt3l  
 1425036\_a\_at 0.93458 trinucleotide repeat containing 6a Tnrc6a  
 1425037\_at 1.06485 "FYVE, RhoGEF and PH domain containing 4" Fgd4  
 1425038\_at 0.98242 "solute carrier family 22 (organic anion transporter), member 19" Slc22a19  
 1425039\_at 0.99955 "integrin, beta-like 1" Itgb1  
 1425040\_at 1.09319 cytochrome b reductase 1 Cybrd1  
 1425041\_at 0.94521 LIM homeobox protein 3 Lhx3  
 1425042\_s\_at 0.99715 "proline, glutamic acid and leucine rich protein 1" Pelp1  
 1425043\_s\_at 1.03671 RIKEN cDNA 0610037D15 gene 0610037D15Rik  
 1425044\_at 0.93496 "potassium inwardly-rectifying channel, subfamily J, member 6" Kcnj6  
 1425045\_at 1.02074 "phospholipase A2, group IVB (cytosolic)" Pla2g4b  
 1425046\_at 1.05302 cDNA sequence BC018465 BC018465  
 1425047\_a\_at 0.90092 RIKEN cDNA 4921517L17 gene 4921517L17Rik  
 1425048\_a\_at 0.99035 high mobility group box 1 Hmgb1  
 1425049\_at 0.82819 2'-5' oligoadenylate synthetase 1H Oas1h  
 1425050\_at 0.90135 isochorismatase domain containing 1 Isoc1  
 1425051\_at 0.92208 isochorismatase domain containing 1 Isoc1  
 1425052\_at 0.84286 "CDNA, clone:Y2G0147N17, strand:unspecified" ---  
 1425053\_at 0.93030 isochorismatase domain containing 1 Isoc1

1425054\_at 1.07997 RIKEN cDNA 2510006D16 gene 2510006D16Rik  
 1425055\_at 0.96602 "SAPS domain family, member 2" Saps2  
 1425056\_s\_at 1.07387 "SAPS domain family, member 2" Saps2  
 1425057\_at 1.00319 RIKEN cDNA 0610038K03 gene 0610038K03Rik  
 1425058\_at 1.06498 zinc finger protein 472 Zfp472  
 1425059\_at 1.01736 protein arginine N-methyltransferase 6 Prmt6  
 1425060\_s\_at 0.84731 restin (Reed-Steinberg cell-expressed intermediate filament-associated protein)  
 Rsn  
 1425061\_at 0.90803 "WAS protein family, member 3" Wasf3  
 1425062\_at 1.20278 Fc receptor-like 1 Fcrl1  
 1425063\_at 1.06228 --- ---  
 1425064\_at 1.08480 aryl hydrocarbon receptor nuclear translocator Arnt  
 1425065\_at 0.92351 2'-5' oligoadenylate synthetase 2 Oas2  
 1425066\_a\_at 0.97416 RIKEN cDNA 1110061O04 gene 1110061O04Rik  
 1425067\_at 1.05142 cadherin EGF LAG seven-pass G-type receptor 3 Celsr3  
 1425068\_a\_at 0.99666 testis expressed gene 264 Tex264  
 1425069\_at 0.97180 cDNA sequence BC018285 BC018285  
 1425070\_at 0.97013 "neurotrophic tyrosine kinase, receptor, type 3" Ntrk3  
 1425071\_s\_at 0.91554 "neurotrophic tyrosine kinase, receptor, type 3" Ntrk3  
 1425072\_at 1.66945 S-phase kinase-associated protein 2 (p45) Skp2  
 1425073\_at 0.99486 "pleckstrin homology domain containing, family G (with RhoGef domain)  
 member 6" Plekhg6  
 1425074\_at 0.89992 Werner syndrome homolog (human) Wrn  
 1425075\_at 0.90644 GATA zinc finger domain containing 2B Gatad2b  
 1425076\_at 1.01303 "DnaJ (Hsp40) homolog, subfamily C, member 18" Dnajc18  
 1425077\_at 0.84726 "DnaJ (Hsp40) homolog, subfamily C, member 18" Dnajc18  
 1425078\_x\_at 0.95607 similar to SP140 nuclear body protein (predicted) LOC620078  
 1425079\_at 1.08373 transmembrane 6 superfamily member 2 Tm6sf2  
 1425080\_at 0.95364 zinc finger protein 286 Zfp286  
 1425081\_at 1.12130 zinc finger protein 286 Zfp286  
 1425082\_s\_at 1.17140 RIKEN cDNA 9030416H16 gene 9030416H16Rik  
 1425083\_at 1.00653 otoraplin Otor  
 1425084\_at 1.12905 "GTPase, IMAP family member 7" Gimap7  
 1425085\_at 1.02864 RIKEN cDNA 6330416L07 gene 6330416L07Rik  
 1425086\_a\_at 1.00210 SLAM family member 6 Slamf6  
 1425087\_at 1.06543 RIKEN cDNA 2310003F16 gene 2310003F16Rik  
 1425088\_at 0.94108 "sodium channel, nonvoltage-gated, type I, alpha" Scnn1a  
 1425089\_at 1.09481 "potassium voltage gated channel, Shaw-related subfamily, member 4" Kcnc4  
 1425090\_s\_at 0.91292 "potassium voltage gated channel, Shaw-related subfamily, member 4"  
 Kcnc4  
 1425091\_at 0.98318 retinoic acid receptor responder (tazarotene induced) 2 Rarres2  
 1425092\_at 1.09979 cadherin 10 Cdh10  
 1425093\_at 1.01512 "purinergic receptor P2X, ligand-gated ion channel, 3" P2rx3

1425094\_a\_at 0.77368 LIM homeobox protein 6 Lhx6  
1425095\_at 1.08236 cDNA sequence BC002059 BC002059  
1425096\_a\_at 0.87786 pentatricopeptide repeat domain 1 Ptc1  
1425097\_a\_at 1.14778 zinc finger protein 106 Zfp106  
1425098\_at 0.95067 zinc finger protein 106 Zfp106  
1425099\_a\_at 0.90532 aryl hydrocarbon receptor nuclear translocator-like Arntl  
1425100\_a\_at 0.88687 "phosphodiesterase 6G, cGMP-specific, rod, gamma" Pde6g  
1425101\_a\_at 1.00817 FK506 binding protein 6 Fkbp6  
1425102\_a\_at 0.24823 angiotensin I converting enzyme (peptidyl-dipeptidase A) 2 Ace2  
1425103\_at 0.48144 angiotensin I converting enzyme (peptidyl-dipeptidase A) 2 Ace2  
1425104\_at 0.90644 potassium channel tetramerisation domain containing 1 Kctd1  
1425105\_at 0.96949 "retinol binding protein 3, interstitial" Rbp3  
1425106\_a\_at 1.06703 tryptophanyl-tRNA synthetase Wars  
1425107\_a\_at 0.86648 leukemia inhibitory factor receptor Lifr  
1425108\_a\_at 0.88476 cDNA sequence BC004728 BC004728  
1425109\_at 0.86483 "solute carrier family 44, member 3" Slc44a3  
1425110\_at 0.95379 sortilin-related VPS10 domain containing receptor 3 Sorcs3  
1425111\_at 1.02357 sortilin-related VPS10 domain containing receptor 3 Sorcs3  
1425112\_at 1.07376 ankyrin repeat domain 27 (VPS9 domain) Ankrd27  
1425113\_x\_at 1.03512 "PREDICTED: Mus musculus hypothetical protein LOC621686  
(LOC621686), mRNA" ---  
1425114\_at 0.81203 retinoblastoma binding protein 6 Rbbp6  
1425115\_at 0.73288 retinoblastoma binding protein 6 Rbbp6  
1425116\_a\_at 1.03625 spectrin beta 4 Spnb4  
1425117\_at 0.96516 RIKEN cDNA 0610012D14 gene 0610012D14Rik  
1425118\_at 1.04945 spire homolog 2 (Drosophila) Spire2  
1425119\_at 0.96167 --- ---  
1425120\_x\_at 0.90013 RIKEN cDNA 1810023F06 gene 1810023F06Rik  
1425121\_a\_at 0.92349 cDNA sequence BC006965 BC006965  
1425122\_at 0.93517 open reading frame 9 ORF9  
1425123\_at 0.91380 cDNA sequence BC025816 BC025816  
1425124\_at 1.02499 ring finger protein 183 Rnf183  
1425125\_at 1.30895 oncoprotein induced transcript 3 Oit3  
1425126\_at 0.89666 neural cell adhesion molecule 1 Ncam1  
1425127\_at 0.91534 "hydroxy-delta-5-steroid dehydrogenase, 3 beta- and steroid delta-isomerase 2"  
Hsd3b2  
1425128\_at 0.84021 "UDP-GlcNAc:betaGal beta-1,3-N-acetylglucosaminyltransferase 8" B3gnt8  
1425129\_a\_at 1.06735 transaldolase 1 Taldo1  
1425130\_a\_at 0.98309 "protein tyrosine phosphatase, non-receptor type 5" Ptpn5  
1425131\_at 0.97973 "protein tyrosine phosphatase, non-receptor type 5" Ptpn5  
1425132\_at 0.92464 neuropilin (NRP) and tolloid (TLL)-like 1 Neto1  
1425133\_s\_at 0.75904 RAB3A interacting protein (rabin3)-like 1 Rab3il1  
1425134\_a\_at 0.96695 "phosphatidylinositol glycan anchor biosynthesis, class X" Pigx

|              |         |                                                                                            |               |  |
|--------------|---------|--------------------------------------------------------------------------------------------|---------------|--|
| 1425135_a_at | 0.89119 | dynamamin 2                                                                                | Dnm2          |  |
| 1425136_x_at | 0.96665 | dynamamin 2                                                                                | Dnm2          |  |
| 1425137_a_at | 1.01654 | "histocompatibility 2, Q region locus 10"                                                  | H2-Q10        |  |
| 1425138_at   | 1.07305 | guanylate cyclase activator 1B                                                             | Guca1b        |  |
| 1425139_at   | 1.00232 | sestrin 2                                                                                  | Sesn2         |  |
| 1425140_at   | 1.23245 | "lactamase, beta 2"                                                                        | Lactb2        |  |
| 1425141_at   | 1.23539 | "lactamase, beta 2"                                                                        | Lactb2        |  |
| 1425142_a_at | 0.99707 | heterogeneous nuclear ribonucleoprotein D                                                  | Hnrpd         |  |
| 1425143_a_at | 0.98722 | NADH dehydrogenase (ubiquinone) Fe-S protein 1                                             | Ndufs1        |  |
| 1425144_at   | 1.02377 | kallikrein 1-related peptidase b11                                                         | Klk1b11       |  |
| 1425145_at   | 0.97007 | interleukin 1 receptor-like 1                                                              | Il1rl1        |  |
| 1425146_at   | 0.87830 | RIKEN cDNA 2410075B13 gene                                                                 | 2410075B13Rik |  |
| 1425147_at   | 1.00334 | RIKEN cDNA 2410075B13 gene                                                                 | 2410075B13Rik |  |
| 1425148_a_at | 0.93937 | sorting nexin 6                                                                            | Snx6          |  |
| 1425149_a_at | 0.85610 | phosducin-like                                                                             | Pdcl          |  |
| 1425150_at   | 1.00089 | RIKEN cDNA C730036D15 gene                                                                 | C730036D15Rik |  |
| 1425151_a_at | 1.02360 | NADPH oxidase organizer 1                                                                  | Noxo1         |  |
| 1425152_s_at | 0.89897 | "serine (or cysteine) peptidase inhibitor, clade I, member 2"                              | Serpini2      |  |
| 1425153_at   | 1.01912 | "myosin, heavy polypeptide 2, skeletal muscle, adult"                                      | Myh2          |  |
| 1425154_a_at | 1.18408 | colony stimulating factor 1 (macrophage)                                                   | Csf1          |  |
| 1425155_x_at | 1.32692 | colony stimulating factor 1 (macrophage)                                                   | Csf1          |  |
| 1425156_at   | 1.01325 | guanylate binding protein 7                                                                | Gbp7          |  |
| 1425157_x_at | 1.03950 | tetraspanin 33                                                                             | Tspan33       |  |
| 1425158_at   | 0.97960 | T-box 20                                                                                   | Tbx20         |  |
| 1425159_at   | 0.93112 | golgi transport 1 homolog A (S. cerevisiae)                                                | Golt1a        |  |
| 1425160_at   | 1.00883 | cDNA sequence AF067063                                                                     | AF067063      |  |
| 1425161_a_at | 0.99193 | TraB domain containing                                                                     | Trabd         |  |
| 1425162_at   | 0.85592 | RAR-related orphan receptor beta                                                           | Rorb          |  |
| 1425163_at   | 0.97659 | expressed sequence AI661453                                                                | AI661453      |  |
| 1425164_a_at | 0.95267 | phosphorylase kinase gamma 1                                                               | Phkg1         |  |
| 1425165_at   | 1.01619 | granzyme N                                                                                 | Gzmn          |  |
| 1425166_at   | 1.03740 | retinoblastoma-like 1 (p107)                                                               | Rbl1          |  |
| 1425167_a_at | 0.89628 | "guanine nucleotide binding protein (G protein), gamma transducing activity polypeptide 1" | Gngt1         |  |
| 1425168_at   | 0.98186 | "guanine nucleotide binding protein (G protein), gamma transducing activity polypeptide 1" | Gngt1         |  |
| 1425169_at   | 0.95266 | testis serine protease 2                                                                   | Tessp2        |  |
| 1425170_a_at | 0.65641 | a disintegrin and metallopeptidase domain 15 (metargidin)                                  | Adam15        |  |
| 1425171_at   | 0.91103 | rhodopsin                                                                                  | Rho           |  |
| 1425172_at   | 1.05020 | rhodopsin                                                                                  | Rho           |  |
| 1425173_s_at | 0.77565 | golgi phosphoprotein 3-like                                                                | Golph3l       |  |
| 1425174_at   | 0.92080 | CDNA clone MGC:18942 IMAGE:3979577                                                         | ---           |  |
| 1425175_at   | 0.89091 | C1q-like 3                                                                                 | C1ql3         |  |

1425176\_at 0.95341 C1q-like 3 C1ql3  
1425177\_at 1.04786 serine hydroxymethyl transferase 1 (soluble) Shmt1  
1425178\_s\_at 0.98456 serine hydroxymethyl transferase 1 (soluble) Shmt1  
1425179\_at 1.09882 serine hydroxymethyl transferase 1 (soluble) Shmt1  
1425180\_at 1.01753 SH3-domain GRB2-like (endophilin) interacting protein 1 Sgip1  
1425181\_at 0.97132 SH3-domain GRB2-like (endophilin) interacting protein 1 Sgip1  
1425182\_x\_at 0.91390 kallikrein 1-related peptidase b22 /// kallikrein 1-related peptidase b9  
Klk1b22 /// Klk1b9  
1425183\_a\_at 1.03849 ribosomal protein L4 Rpl4  
1425184\_at 0.98446 RIKEN cDNA 2810433K01 gene 2810433K01Rik  
1425185\_at 1.08765 RIKEN cDNA 5830417C01 gene 5830417C01Rik  
1425186\_at 1.04832 LMBR1 domain containing 1 Lmbrd1  
1425187\_at 0.94488 Sel1 (suppressor of lin-12) 1 homolog (C. elegans) Sel1h  
1425188\_s\_at 1.02084 Sel1 (suppressor of lin-12) 1 homolog (C. elegans) Sel1h  
1425189\_a\_at 1.03274 mitochondrial ribosomal protein L15 Mrpl15  
1425190\_a\_at 1.01035 "phosphatase, orphan 2" Phospho2  
1425191\_at 0.87938 RIKEN cDNA 9430098E02 gene 9430098E02Rik  
1425192\_at 0.98762 kelch-like 25 (Drosophila) Klhl25  
1425193\_at 0.96524 RIKEN cDNA 2010106G01 gene 2010106G01Rik  
1425194\_a\_at 1.06113 RIKEN cDNA 6330577E15 gene 6330577E15Rik  
1425195\_a\_at 1.55069 acetyl-Coenzyme A acetyltransferase 2 /// acetyl-Coenzyme A  
acetyltransferase 3 Acat2 /// Acat3  
1425196\_a\_at 0.95949 histidine triad nucleotide binding protein 2 Hint2  
1425197\_at 0.84465 "protein tyrosine phosphatase, non-receptor type 2" Ptpn2  
1425198\_at 1.01510 "protein tyrosine phosphatase, non-receptor type 2" Ptpn2  
1425199\_a\_at 1.00894 erythrocyte protein band 4.1-like 5 Epb4.115  
1425200\_at 1.07335 chloride channel CLIC-like 1 Clcc1  
1425201\_a\_at 1.16545 hydroxypyruvate isomerase homolog (E. coli) Hyi  
1425202\_a\_at 0.88506 "ankyrin 3, epithelial" Ank3  
1425203\_at 1.23061 DEAD (Asp-Glu-Ala-Asp) box polypeptide 19b Ddx19b  
1425204\_s\_at 1.02082 DEAD (Asp-Glu-Ala-Asp) box polypeptide 19a /// DEAD (Asp-Glu-Ala-Asp)  
box polypeptide 19b Ddx19a /// Ddx19b  
1425205\_at 0.83929 DEAD (Asp-Glu-Ala-Asp) box polypeptide 19b Ddx19b  
1425206\_a\_at 0.81685 Ubiquitin protein ligase E3A Ube3a  
1425207\_at 0.97861 cDNA sequence BC026439 BC026439  
1425208\_at 0.85527 limb-bud and heart Lbh  
1425209\_at 0.96178 zinc finger protein 84 Zfp84  
1425210\_s\_at 1.07681 zinc finger protein 84 Zfp84  
1425211\_at 1.04517 RIKEN cDNA 2010003O18 gene 2010003O18Rik  
1425212\_a\_at 1.02476 "tumor necrosis factor receptor superfamily, member 19" Tnfrsf19  
1425213\_at 0.59292 RIKEN cDNA 6430514L14 gene 6430514L14Rik  
1425214\_at 1.29307 "pyrimidinergic receptor P2Y, G-protein coupled, 6" P2ry6  
1425215\_at 1.14718 free fatty acid receptor 2 Ffar2



1425216\_at 1.03422 free fatty acid receptor 2 Ffar2  
 1425217\_a\_at 0.92787 synaptojanin 2 Synj2  
 1425218\_a\_at 1.04110 "secretoglobin, family 3A, member 2" Scgb3a2  
 1425219\_x\_at 1.15927 "guanine nucleotide binding protein (G protein), gamma transducing activity polypeptide 1" Gngt1  
 1425220\_x\_at 0.99438 "cDNA sequence AF067061 /// hypothetical protein LOC639910 /// similar to 2-cell-stage, variable group, member 1" AF067061 /// LOC639910 /// LOC675060  
 1425221\_at 1.05908 RIKEN cDNA E030025L21 gene E030025L21Rik  
 1425222\_x\_at 1.02543 RIKEN cDNA D630002G06 gene /// RIKEN cDNA C730048C13 gene /// similar to integral membrane transport protein UST5r D630002G06Rik /// C730048C13Rik /// LOC673838  
 1425223\_at 0.92567 baculoviral IAP repeat-containing 3 Birc3  
 1425224\_at 0.94511 cDNA sequence BC019561 BC019561  
 1425225\_at 0.93383 "Fc fragment of IgG, low affinity IIIa, receptor" Fcgr3a  
 1425226\_x\_at 1.03245 "T-cell receptor beta, variable 13 /// similar to T-cell receptor beta-2 chain C region /// similar to T-cell receptor beta-1 chain C region /// similar to T-cell receptor beta-2 chain C region" Tcrb-V13 /// LOC665506 /// LOC669847 /// LOC674048  
 1425227\_a\_at 1.18678 "ATPase, H+ transporting, lysosomal V0 subunit A1" Atp6v0a1  
 1425228\_a\_at 0.95632 deoxyguanosine kinase Dguok  
 1425229\_a\_at 0.95982 "transcription factor 7-like 2, T-cell specific, HMG-box" Tcf7l2  
 1425230\_at 1.04767 N-acetylglutamate synthase Nags  
 1425231\_a\_at 0.89635 zinc finger protein 46 Zfp46  
 1425232\_x\_at 0.91675 "arrestin 3, retinal" Arr3  
 1425233\_at 0.97047 RIKEN cDNA 2210407C18 gene 2210407C18Rik  
 1425234\_at 0.93132 "collagen, type XX, alpha 1" Col20a1  
 1425235\_s\_at 0.99338 "collagen, type XX, alpha 1" Col20a1  
 1425236\_at 1.01190 "collagen, type XX, alpha 1" Col20a1  
 1425237\_at 0.93565 keratin associated protein 16-8 Krtap16-8  
 1425238\_at 1.13569 40S ribosomal protein S20 pseudogene LOC625603  
 1425239\_at 0.91661 SET domain containing 4 Setd4  
 1425240\_at 1.05320 cDNA sequence BC011426 BC011426  
 1425241\_a\_at 0.98651 WD repeat and SOCS box-containing 1 Wsb1  
 1425242\_at 1.00197 RIKEN cDNA 1810006K21 gene 1810006K21Rik  
 1425243\_at 0.86480 CD 207 antigen Cd207  
 1425244\_a\_at 0.87171 testicular haploid expressed gene Theg  
 1425245\_a\_at 0.89004 regulator of G-protein signaling 11 Rgs11  
 1425246\_at 0.93912 RIKEN cDNA 0610008F07 gene 0610008F07Rik  
 1425247\_a\_at 0.96591 immunoglobulin heavy chain 4 (serum IgG1) Igh-4  
 1425248\_a\_at 0.80113 TYRO3 protein tyrosine kinase 3 Tyro3  
 1425249\_a\_at 1.07162 TYRO3 protein tyrosine kinase 3 Tyro3  
 1425250\_a\_at 0.90942 "solute carrier family 14 (urea transporter), member 2" Slc14a2  
 1425251\_at 0.93792 prostaglandin E receptor 3 (subtype EP3) Ptger3  
 1425252\_a\_at 0.97759 mitotic arrest deficient 1-like 1 Mad11

1425253\_a\_at 1.12045 mucosal vascular addressin cell adhesion molecule 1 Madcam1  
1425254\_at 1.03354 forkhead box N4 Foxn4  
1425255\_s\_at 1.01577 heterogeneous nuclear ribonucleoprotein L-like Hnrpll  
1425256\_a\_at 0.95540 DIX domain containing 1 Dixdc1  
1425257\_at 0.99317 acyl-CoA thioesterase 5 Acot5  
1425258\_at 0.94402 cystatin 11 Cst11  
1425259\_x\_at 1.02407 "killer cell lectin-like receptor subfamily A, member 12" Klra12  
1425260\_at 1.03312 albumin 1 Alb1  
1425261\_at 1.07135 "CCAAT/enhancer binding protein (C/EBP), gamma" Cebpg  
1425262\_at 1.12011 "CCAAT/enhancer binding protein (C/EBP), gamma" Cebpg  
1425263\_a\_at 1.17537 myelin basic protein Mbp  
1425264\_s\_at 1.05486 myelin basic protein Mbp  
1425265\_a\_at 0.93302 prion protein interacting protein 1 Prnpi1  
1425266\_a\_at 1.00755 "RAP1, GTP-GDP dissociation stimulator 1" Rap1gds1  
1425267\_a\_at 0.91334 RIKEN cDNA 3110045G13 gene 3110045G13Rik  
1425268\_a\_at 0.96324 RIKEN cDNA 3110045G13 gene 3110045G13Rik  
1425269\_at 1.00184 "amyloid beta (A4) precursor protein-binding, family B, member 1 interacting protein" Apbb1p  
1425270\_at 1.20773 kinesin family member 1B Kif1b  
1425271\_at 1.00335 "proteasome (prosome, macropain) 26S subunit, ATPase 3, interacting protein" Psmc3ip  
1425272\_at 0.87591 epithelial membrane protein 2 Emp2  
1425273\_s\_at 0.84407 epithelial membrane protein 2 Emp2  
1425274\_at 1.18503 aspartate-beta-hydroxylase Asph  
1425275\_at 1.12842 aspartate-beta-hydroxylase Asph  
1425276\_at 0.87229 fibrosin 1 Fbs1  
1425277\_at 1.04687 slit homolog 1 (Drosophila) Slit1  
1425278\_at 1.11573 "ubiquitination factor E4A, UFD2 homolog (S. cerevisiae)" Ube4a  
1425279\_at 0.85137 PDLIM1 interacting kinase 1 like Pdik11  
1425280\_at 0.93462 leukocyte receptor cluster (LRC) member 1 Leng1  
1425281\_a\_at 0.73093 TSC22 domain family 3 Tsc22d3  
1425282\_at 0.89308 IBR domain containing 2 Ibrdc2  
1425283\_a\_at 1.24271 "metallothionein-like 5, testis-specific (tesmin)" Mtl5  
1425284\_a\_at 1.06958 "RAB27A, member RAS oncogene family" Rab27a  
1425285\_a\_at 0.98410 "RAB27A, member RAS oncogene family" Rab27a  
1425286\_at 0.95094 "crystallin, gamma N" Crygn  
1425287\_at 0.91372 zinc finger protein 189 Zfp189  
1425288\_at 0.98054 sterile alpha motif domain containing 11 Samd11  
1425289\_a\_at 0.94896 complement receptor 2 Cr2  
1425290\_at 1.06169 syntaxin 19 Stx19  
1425291\_at 0.78290 forkhead box J1 Foxj1  
1425292\_at 1.05971 dystrobrevin alpha Dtna  
1425293\_a\_at 1.06236 "zinc finger, CCHC domain containing 18" Zcchc18

1425294\_at 1.05746 SLAM family member 8 Slamf8  
1425295\_at 0.84421 "eosinophil-associated, ribonuclease A family, member 11" Ear11  
1425296\_a\_at 0.95693 regulator of G-protein signaling 3 /// similar to Regulator of G-protein signaling 3 (RGS3) (C2PA) /// similar to Regulator of G-protein signaling 3 (RGS3) (C2PA) Rgs3 ///  
LOC436235 /// LOC670092  
1425297\_at 0.96437 cDNA sequence BC012278 BC012278  
1425298\_a\_at 0.84662 baculoviral IAP repeat-containing 1a Birc1a  
1425299\_s\_at 1.06761 RIKEN cDNA 0610038D11 gene /// similar to UPF0315 protein /// similar to UPF0315 protein /// similar to UPF0315 protein 0610038D11Rik ///  
LOC623390 /// LOC627985 /// LOC631562 /// LOC665860  
1425300\_at 1.11846 dihydroxyacetone kinase 2 homolog (yeast) Dak  
1425301\_at 1.12706 neural cell adhesion molecule 2 Ncam2  
1425302\_at 0.85832 cDNA sequence BC024997 BC024997  
1425303\_at 0.95991 glucokinase Gck  
1425304\_s\_at 0.93283 proline rich membrane anchor 1 Prima1  
1425305\_at 1.08266 zinc finger protein 295 Zfp295  
1425306\_at 0.95615 cDNA sequence BC027072 BC027072  
1425307\_at 0.96591 "dynein, axonemal, heavy chain 1" Dnahc1  
1425308\_at 0.95565 tripartite motif-containing 31 Trim31  
1425309\_at 1.04535 "cation channel, sperm associated 2" Catsper2  
1425310\_a\_at 0.91191 EMI domain containing 2 Emid2  
1425311\_at 1.10647 RIKEN cDNA 4930432F04 gene 4930432F04Rik  
1425312\_s\_at 1.08766 "DNA segment, Chr 11, ERATO Doi 636, expressed" D11Erttd636e  
1425313\_at 1.03865 calcium response factor Carf  
1425314\_at 0.94962 G protein-coupled receptor 98 Gpr98  
1425315\_at 1.60249 dedicator of cytokinesis 7 Dock7  
1425316\_at 0.83045 "beta-1,3-glucuronyltransferase 1 (glucuronosyltransferase P)" B3gat1  
1425317\_x\_at 0.92748 serine threonine kinase 31 Stk31  
1425318\_a\_at 0.92245 transmembrane protein 116 Tmem116  
1425319\_s\_at 1.06753 RIKEN cDNA 6530403A03 gene 6530403A03Rik  
1425320\_at 1.14641 RIKEN cDNA A830023I12 gene A830023I12Rik  
1425321\_a\_at 1.00674 calmin Clmn  
1425322\_at 0.99418 interferon zeta /// similar to interferon zeta  
Ifnz /// LOC435791 /// LOC545645 /// LOC545646 /// LOC545647 ///  
LOC545648 /// LOC545649 /// LOC545650 /// LOC545651 /// LOC545652 /// LOC545653 ///  
LOC545654 /// LOC545655 /// LOC638085 /// LOC641172 /// LOC668147 /// LOC668208 ///  
LOC671856 /// LOC673717  
1425323\_a\_at 1.12137 cDNA sequence BC008155 BC008155  
1425324\_x\_at 1.05663 immunoglobulin heavy chain 4 (serum IgG1) Igh-4

1425325\_at 0.93450 "membrane-spanning 4-domains, subfamily A, member 4B" Ms4a4b  
 1425326\_at 1.36034 ATP citrate lyase Acly  
 1425327\_at 0.96667 cDNA sequence BC008163 BC008163  
 1425328\_at 0.97914 cDNA sequence BC008163 BC008163  
 1425329\_a\_at 1.08855 cytochrome b5 reductase 3 Cyb5r3  
 1425330\_a\_at 0.93378 "protein phosphatase 1B, magnesium dependent, beta isoform" Ppm1b  
 1425331\_at 1.08482 zinc finger protein 106 Zfp106  
 1425332\_at 1.04043 zinc finger protein 106 Zfp106  
 1425333\_at 0.90803 RIKEN cDNA 1810048P08 gene 1810048P08Rik  
 1425334\_at 0.99821 golgi reassembly stacking protein 1 Gorasp1  
 1425335\_at 0.99528 "CD8 antigen, alpha chain /// similar to T-cell surface glycoprotein CD8 alpha chain precursor (T-cell surface glycoprotein Lyt-2) /// similar to T-cell surface glycoprotein CD8 alpha chain precursor (T-cell surface glycoprotein Lyt-2) (CD8a antigen)" Cd8a /// LOC636147 /// LOC669166  
 1425336\_x\_at 1.20515 "histocompatibility 2, K1, K region" H2-K1  
 1425337\_at 0.84854 "solute carrier family 12, member 5" Slc12a5  
 1425338\_at 0.92434 "phospholipase C, beta 4" Plcb4  
 1425339\_at 0.89414 "phospholipase C, beta 4" Plcb4  
 1425340\_a\_at 0.98362 "protein tyrosine phosphatase, receptor type, A" Ptptra  
 1425341\_at 1.00784 "potassium channel, subfamily K, member 3" Kcnk3  
 1425342\_a\_at 0.96756 "potassium channel, subfamily K, member 3" Kcnk3  
 1425343\_at 0.90714 haloacid dehalogenase-like hydrolase domain containing 3 Hdhd3  
 1425344\_at 1.02316 nuclear prelamin A recognition factor Narf  
 1425345\_at 0.88534 coiled-coil domain containing 28A Ccdc28a  
 1425346\_at 0.99259 zinc finger protein 318 Zfp318  
 1425347\_a\_at 1.06152 zinc finger protein 318 Zfp318  
 1425348\_a\_at 0.81260 "signal recognition particle receptor, B subunit" Srprb  
 1425349\_a\_at 1.07518 "myelin basic protein expression factor 2, repressor" Myef2  
 1425350\_a\_at 1.00808 "myelin basic protein expression factor 2, repressor" Myef2  
 1425351\_at 1.01303 sulfiredoxin 1 homolog (S. cerevisiae) Srxn1  
 1425352\_at 0.96749 REST corepressor 3 Rcor3  
 1425353\_at 0.98316 ectonucleotide pyrophosphatase/phosphodiesterase 3 Enpp3  
 1425354\_a\_at 0.93295 angiogenic factor with G patch and FHA domains 1 Aggf1  
 1425355\_at 0.93860 cDNA sequence BC018371 /// hypothetical LOC433604 BC018371 /// LOC433604  
 1425356\_at 0.89746 zinc finger protein 142 Zfp142  
 1425357\_a\_at 1.09458 gremlin 1 Grem1  
 1425358\_at 1.07743 RIO kinase 1 (yeast) Riok1  
 1425359\_at 1.02031 "mal, T-cell differentiation protein-like" Mall  
 1425360\_at 0.92420 similar to myeloid/lymphoid or mixed lineage-leukemia translocation to 6 homolog /// similar to myeloid/lymphoid or mixed lineage-leukemia translocation to 6 homolog LOC639490 /// LOC669933  
 1425361\_at 1.00315 zinc finger protein 397 Zfp397

1425362\_at 2.96741 HIV-1 Rev binding protein-like Hrbl  
 1425363\_at 0.94237 "beta-1,4-N-acetyl-galactosaminyl transferase 1" B4galnt1  
 1425364\_a\_at 0.90567 "solute carrier family 3 (activators of dibasic and neutral amino acid transport), member 2" Slc3a2  
 1425365\_a\_at 0.97521 "cytochrome P450, family 2, subfamily d, polypeptide 13" Cyp2d13  
 1425366\_a\_at 0.96091 Hus1 homolog (S. pombe) Hus1  
 1425367\_at 1.08562 integrin alpha L /// similar to Integrin alpha-L precursor (Leukocyte adhesion glycoprotein LFA-1 alpha chain) (LFA-1A) (Leukocyte function-associated molecule 1 alpha chain) (Lymphocyte antigen Ly-15) (CD11a antigen) Itgal /// LOC671163  
 1425368\_a\_at 0.91836 numb gene homolog (Drosophila) Numb  
 1425369\_a\_at 0.95314 SRY-box containing gene 10 Sox10  
 1425370\_a\_at 0.93997 avian erythroblastosis virus E-26 (v-ets) oncogene related Erg  
 1425371\_at 1.42655 "polymerase (DNA directed), beta" Polb  
 1425372\_at 0.95711 "DnaJ (Hsp40) homolog, subfamily C, member 19" Dnajc19  
 1425373\_a\_at 1.06306 "tumor necrosis factor superfamily, member 5-induced protein 1" Tnfsf5ip1  
 1425374\_at 1.11492 2'-5' oligoadenylate synthetase 3 Oas3  
 1425375\_at 1.09736 TD and POZ domain containing 1 Tdpoz1  
 1425376\_at 0.98643 arachidonate 8-lipoxygenase Alox8  
 1425377\_at 0.97844 wingless-related MMTV integration site 1 Wnt1  
 1425378\_at 1.02087 hect (homologous to the E6-AP (UBE3A) carboxyl terminus) domain and RCC1 (CHC1)-like domain (RLD) 1 Herc1  
 1425379\_at 0.98014 hepatocyte growth factor Hgf  
 1425380\_at 0.87362 RAS guanyl releasing protein 4 Rasgrp4  
 1425381\_a\_at 0.94881 transferrin receptor 2 Trfr2  
 1425382\_a\_at 0.98954 aquaporin 4 Aqp4  
 1425383\_a\_at 0.75490 pre B-cell leukemia transcription factor 1 /// region containing RIKEN cDNA 2310056B04 gene; pre B-cell leukemia transcription factor 1 Pbx1 /// LOC676870  
 1425384\_a\_at 1.09640 "ubiquitination factor E4A, UFD2 homolog (S. cerevisiae)" Ube4a  
 1425385\_a\_at 0.96398 immunoglobulin heavy chain 1a (serum IgG2a) Igh-1a  
 1425386\_at 1.03978 RIKEN cDNA 4833422F24 gene 4833422F24Rik  
 1425387\_at 0.86965 "aldo-keto reductase family 1, member C20" Akr1c20  
 1425388\_a\_at 0.84358 thiamine pyrophosphokinase Tpk1  
 1425389\_a\_at 0.97632 runt related transcription factor 2 Runx2  
 1425390\_at 1.00590 "adenosine deaminase, tRNA-specific 1" Adat1  
 1425391\_a\_at 0.94082 oxysterol binding protein-like 5 Osbp15  
 1425392\_a\_at 0.94371 "nuclear receptor subfamily 1, group I, member 3" Nr1i3  
 1425393\_a\_at 0.89975 mitogen activated protein kinase kinase 7 Map2k7  
 1425394\_at 0.87521 cDNA sequence BC023105 BC023105  
 1425395\_at 0.94026 a disintegrin and metallopeptidase domain 26A (testase 3) Adam26a  
 1425396\_a\_at 0.92729 lymphocyte protein tyrosine kinase Lck  
 1425397\_at 0.99689 CDNA clone MGC:6909 IMAGE:2655941 ---  
 1425398\_at 0.94261 "histone 1, H2bc /// similar to Histone H2B F (H2B 291A) /// similar to Histone H2B F (H2B 291A) /// similar to Histone H2B F (H2B 291A)" Hist1h2bc /// LOC665596 ///

## LOC665622 /// LOC671645

1425399\_at 1.04635 RIKEN cDNA 9630055N22 gene 9630055N22Rik  
 1425400\_a\_at 0.96056 "Cbp/p300-interacting transactivator, with Glu/Asp-rich carboxy-terminal domain, 4" Cited4  
 1425401\_at 1.04765 "DNA segment, Chr 11, ERATO Doi 636, expressed" D11Ertd636e  
 1425402\_at 1.10836 thimet oligopeptidase 1 Thop1  
 1425403\_at 1.01347 dynamin 3 Dnm3  
 1425404\_a\_at 0.94438 transmembrane protein 110 Tmem110  
 1425405\_a\_at 1.30733 "adenosine deaminase, RNA-specific" Adar  
 1425406\_at 1.09294 "C-type lectin domain family 4, member a2" Clec4a2  
 1425407\_s\_at 1.02978 "C-type lectin domain family 4, member a2 /// C-type lectin domain family 4, member b1" Clec4a2 /// Clec4b1  
 1425408\_a\_at 1.06349 RIKEN cDNA 2610034M16 gene 2610034M16Rik  
 1425409\_at 1.03887 "cholinergic receptor, nicotinic, alpha polypeptide 2 (neuronal)" Chrna2  
 1425410\_at 0.96348 Tp53rk binding protein Tprkb  
 1425411\_at 0.86894 ADP-ribosylation factor-like 4A Arl4a  
 1425412\_at 1.00692 cold autoinflammatory syndrome 1 homolog (human) Cias1  
 1425413\_at 0.85118 "regulatory factor X, 3 (influences HLA class II expression)" Rfx3  
 1425414\_at 0.95608 "protein phosphatase 1, regulatory (inhibitor) subunit 16B" Ppp1r16b  
 1425415\_a\_at 0.88672 "solute carrier family 1 (neuronal/epithelial high affinity glutamate transporter, system Xag), member 1" Slc1a1  
 1425416\_s\_at 0.97682 proline/serine-rich coiled-coil 1 Psrc1  
 1425417\_x\_at 1.03122 "killer cell lectin-like receptor, subfamily A, member 8 /// killer cell lectin-like receptor subfamily A, member 21 /// similar to killer cell lectin-like receptor subfamily A, member 21 /// killer cell lectin-like receptor subfamily A member 29 /// similar to killer cell lectin-like receptor subfamily A, member 21 /// similar to Killer cell lectin-like receptor 8 (T-cell surface glycoprotein Ly-49H) (Ly49-H antigen) (Lymphocyte antigen 49H)" Klra8 /// Klra21 /// LOC640965 /// Klra29 ///  
 LOC667769 /// LOC673223  
 1425418\_at 0.94603 WAP four-disulfide core domain 5 Wfdc5  
 1425419\_a\_at 0.96392 v-raf-leukemia viral oncogene 1 Raf1  
 1425420\_s\_at 1.20532 large tumor suppressor 2 Lats2  
 1425421\_at 1.23554 Retinoblastoma binding protein 6 Rbbp6  
 1425422\_a\_at 0.97407 poly(A)-specific ribonuclease (deadenylation nuclease) Parn  
 1425423\_at 0.83561 GLIS family zinc finger 1 Glis1  
 1425424\_at 1.13825 hypothetical protein LOC620031 MGC7817  
 1425425\_a\_at 1.00069 Wnt inhibitory factor 1 Wif1  
 1425426\_a\_at 0.75378 myocyte enhancer factor 2A Mef2a  
 1425427\_at 0.89073 hypothetical protein LOC639910 LOC639910  
 1425428\_at 0.87822 "hypoxia inducible factor 3, alpha subunit" Hif3a  
 1425429\_s\_at 0.92791 "hypoxia inducible factor 3, alpha subunit /// similar to hypoxia inducible factor 3, alpha subunit" Hif3a /// LOC641092  
 1425430\_at 0.90711 keratin associated protein 16-5 Krtap16-5  
 1425431\_at 1.01925 keratin associated protein 16-10 /// keratin associated protein 16-3 /// keratin

associated protein 16-6 Krtap16-10 /// Krtap16-3 /// Krtap16-6  
 1425432\_at 0.87237 "opioid receptor, mu 1" Oprm1  
 1425433\_a\_at 0.94375 neuropilin 2 Nrp2  
 1425434\_a\_at 0.91694 macrophage scavenger receptor 1 Msr1  
 1425435\_at 0.97368 macrophage scavenger receptor 1 Msr1  
 1425436\_x\_at 1.03703 "killer cell lectin-like receptor, subfamily A, member 3" Klra3  
 1425437\_a\_at 1.14611 "potassium channel, subfamily K, member 7" Kcnk7  
 1425438\_at 0.94615 --- ---  
 1425439\_a\_at 0.81891 "solute carrier family 41, member 3" Slc41a3  
 1425440\_x\_at 0.91689 "solute carrier family 41, member 3" Slc41a3  
 1425441\_at 0.93295 --- ---  
 1425442\_at 1.01858 osteoclast associated receptor Oscar  
 1425443\_at 1.08624 "transcription factor AP-2, delta" Tcfap2d  
 1425444\_a\_at 1.00112 "transforming growth factor, beta receptor II" Tgfbr2  
 1425445\_a\_at 1.02389 claudin 18 Cldn18  
 1425446\_at 0.90537 --- ---  
 1425447\_at 1.06648 dickkopf homolog 4 (Xenopus laevis) Dkk4  
 1425448\_x\_at 1.00442 "ATPase, H+ transporting, lysosomal V0 subunit B" Atp6v0b  
 1425449\_at 0.90989 phosphatidic acid phosphatase 2a Ppap2a  
 1425450\_at 0.88902 chitinase 3-like 4 Chi3l4  
 1425451\_s\_at 0.97096 chitinase 3-like 3 /// chitinase 3-like 4 Chi3l3 /// Chi3l4  
 1425452\_s\_at 0.92275 "protein tyrosine phosphatase, receptor type, J /// expressed sequence  
 AW125753" Ptpnj /// AW125753  
 1425453\_x\_at 1.01977 "killer cell lectin-like receptor subfamily A, member 12" Klra12  
 1425454\_a\_at 0.99882 interleukin 12a Il12a  
 1425455\_a\_at 1.03731 churchill domain containing 1 Churc1  
 1425456\_a\_at 1.05646 mitogen activated protein kinase kinase 3 Map2k3  
 1425457\_a\_at 1.03315 growth factor receptor bound protein 10 Grb10  
 1425458\_a\_at 0.86352 growth factor receptor bound protein 10 Grb10  
 1425459\_at 1.05614 myotubularin related protein 2 Mtmr2  
 1425460\_at 1.03564 myotubularin related protein 2 Mtmr2  
 1425461\_at 0.87754 F-box and WD-40 domain protein 11 Fbxw11  
 1425462\_at 0.96376 F-box and WD-40 domain protein 11 Fbxw11  
 1425463\_at 0.76842 GATA binding protein 6 Gata6  
 1425464\_at 0.77540 GATA binding protein 6 Gata6  
 1425465\_a\_at 0.99764 SUMO/sentrin specific peptidase 2 Senp2  
 1425466\_at 1.04261 SUMO/sentrin specific peptidase 2 Senp2  
 1425467\_a\_at 0.91063 proteolipid protein (myelin) 1 Plp1  
 1425468\_at 0.97990 proteolipid protein (myelin) 1 Plp1  
 1425469\_a\_at 0.91943 RIKEN cDNA 9030208C03 gene 9030208C03Rik  
 1425470\_at 0.97190 --- ---  
 1425471\_x\_at 0.82961 --- ---  
 1425472\_a\_at 1.05883 lamin A Lmna

|              |         |                                                                                                                                                |             |
|--------------|---------|------------------------------------------------------------------------------------------------------------------------------------------------|-------------|
| 1425473_at   | 1.08974 | "cofactor required for Sp1 transcriptional activation, subunit 6"                                                                              | Crsp6       |
| 1425474_a_at | 0.83002 | vacuolar protein sorting 39 (yeast)                                                                                                            | Vps39       |
| 1425475_at   | 0.72344 | "procollagen, type IV, alpha 5"                                                                                                                | Col4a5      |
| 1425476_at   | 0.75076 | "procollagen, type IV, alpha 5"                                                                                                                | Col4a5      |
| 1425477_x_at | 0.90709 | "histocompatibility 2, class II antigen A, beta 1"                                                                                             | H2-Ab1      |
| 1425478_x_at | 0.90886 | ubiquitin-conjugating enzyme E2I                                                                                                               | Ube2i       |
| 1425479_at   | 1.05304 | SET and MYND domain containing 5                                                                                                               | Smyd5       |
| 1425480_at   | 1.01225 | "CCR4-NOT transcription complex, subunit 6-like"                                                                                               | Cnot6l      |
| 1425481_at   | 0.93073 | "CCR4-NOT transcription complex, subunit 6-like"                                                                                               | Cnot6l      |
| 1425482_s_at | 0.91985 | ankyrin repeat and MYND domain containing 2                                                                                                    | Ankmy2      |
| 1425483_at   | 0.89312 | thymocyte selection-associated HMG box gene                                                                                                    | Tox         |
| 1425484_at   | 1.10343 | thymocyte selection-associated HMG box gene                                                                                                    | Tox         |
| 1425485_at   | 0.99147 | myotubularin related protein 6                                                                                                                 | Mtmr6       |
| 1425486_s_at | 1.00824 | myotubularin related protein 6                                                                                                                 | Mtmr6       |
| 1425487_at   | 0.92019 | "DNA segment, Chr 11, ERATO Doi 730, expressed"                                                                                                | D11Ertd730e |
| 1425488_at   | 1.06917 | "DNA segment, Chr 11, ERATO Doi 730, expressed"                                                                                                | D11Ertd730e |
| 1425489_at   | 0.95108 | "DNA segment, Chr 11, ERATO Doi 730, expressed"                                                                                                | D11Ertd730e |
| 1425490_a_at | 1.01216 | WD repeat domain 13                                                                                                                            | Wdr13       |
| 1425491_at   | 0.94293 | "bone morphogenetic protein receptor, type 1A"                                                                                                 | Bmpr1a      |
| 1425492_at   | 1.02316 | "bone morphogenetic protein receptor, type 1A"                                                                                                 | Bmpr1a      |
| 1425493_at   | 0.87398 | "bone morphogenetic protein receptor, type 1A"                                                                                                 | Bmpr1a      |
| 1425494_s_at | 0.93864 | "bone morphogenetic protein receptor, type 1A"                                                                                                 | Bmpr1a      |
| 1425495_at   | 0.88325 | zinc finger protein 62                                                                                                                         | Zfp62       |
| 1425496_at   | 0.93302 | "ATP-binding cassette, sub-family A (ABC1), member 3"                                                                                          | Abca3       |
| 1425497_a_at | 0.98890 | PRP4 pre-mRNA processing factor 4 homolog B (yeast)                                                                                            | Prpf4b      |
| 1425498_at   | 1.03625 | PRP4 pre-mRNA processing factor 4 homolog B (yeast)                                                                                            | Prpf4b      |
| 1425499_at   | 1.00895 | Hypothetical protein LOC625794                                                                                                                 | LOC625794   |
| 1425500_x_at | 1.07324 | Hypothetical protein LOC625794                                                                                                                 | LOC625794   |
| 1425501_at   | 0.88966 | "Mammary gland RCB-0526 Jyg-MC(A) cDNA, RIKEN full-length enriched library, clone:G830022P11 product:unclassifiable, full insert sequence" --- |             |
| 1425502_x_at | 0.92342 | "Mammary gland RCB-0526 Jyg-MC(A) cDNA, RIKEN full-length enriched library, clone:G830022P11 product:unclassifiable, full insert sequence" --- |             |
| 1425503_at   | 1.13661 | "glucosaminyl (N-acetyl) transferase 2, I-branching enzyme"                                                                                    | Gcnt2       |
| 1425504_at   | 0.92067 | "myosin, light polypeptide kinase"                                                                                                             | Mylk        |
| 1425505_at   | 0.93188 | "myosin, light polypeptide kinase"                                                                                                             | Mylk        |
| 1425506_at   | 1.11682 | "myosin, light polypeptide kinase"                                                                                                             | Mylk        |
| 1425507_at   | 1.12686 | ADP-ribosylation factor related protein 1                                                                                                      | Arfrp1      |
| 1425508_s_at | 0.97844 | ADP-ribosylation factor related protein 1                                                                                                      | Arfrp1      |
| 1425509_at   | 0.99252 | MAP/microtubule affinity-regulating kinase 1                                                                                                   | Mark1       |
| 1425510_at   | 1.02297 | MAP/microtubule affinity-regulating kinase 1                                                                                                   | Mark1       |
| 1425511_at   | 0.86869 | MAP/microtubule affinity-regulating kinase 1                                                                                                   | Mark1       |
| 1425512_at   | 1.03786 | mitogen activated protein kinase kinase 7                                                                                                      | Map2k7      |
| 1425513_at   | 0.93882 | mitogen activated protein kinase kinase 7                                                                                                      | Map2k7      |



1425514\_at 1.09358 "phosphatidylinositol 3-kinase, regulatory subunit, polypeptide 1 (p85 alpha)"  
 Pik3r1  
 1425515\_at 0.92162 "phosphatidylinositol 3-kinase, regulatory subunit, polypeptide 1 (p85 alpha)"  
 Pik3r1  
 1425516\_at 0.90877 O-linked N-acetylglucosamine (GlcNAc) transferase (UDP-N-acetylglucosamine:polypeptide-N-acetylglucosaminyl transferase) Ogt  
 1425517\_s\_at 0.93836 O-linked N-acetylglucosamine (GlcNAc) transferase (UDP-N-acetylglucosamine:polypeptide-N-acetylglucosaminyl transferase) Ogt  
 1425518\_at 0.90701 Rap guanine nucleotide exchange factor (GEF) 4 Rapgef4  
 1425519\_a\_at 1.41070 "CD74 antigen (invariant polypeptide of major histocompatibility complex, class II antigen-associated)" Cd74  
 1425520\_a\_at 0.87053 dehydrodolichyl diphosphate synthase Dhdds  
 1425521\_at 1.04422 polyadenylate binding protein-interacting protein 1 Paip1  
 1425522\_at 1.56341 RIKEN cDNA 2600011C06 gene 2600011C06Rik  
 1425523\_at 1.08922 RIKEN cDNA 2600011C06 gene 2600011C06Rik  
 1425524\_at 1.84224 RIKEN cDNA 2600011C06 gene 2600011C06Rik  
 1425525\_a\_at 1.12197 "purinergic receptor P2X, ligand-gated ion channel 4" P2rx4  
 1425526\_a\_at 0.95720 paired related homeobox 1 Prrx1  
 1425527\_at 0.96113 paired related homeobox 1 Prrx1  
 1425528\_at 0.96804 paired related homeobox 1 Prrx1  
 1425529\_s\_at 0.96357 "DNA segment, Chr 19, Wayne State University 162, expressed"  
 D19Wsu162e  
 1425530\_a\_at 0.98149 syntaxin 3 Stx3  
 1425531\_at 1.05204 "zinc finger, HIT domain containing 1" Znhit1  
 1425532\_a\_at 0.95297 bridging integrator 1 Bin1  
 1425533\_a\_at 0.90833 staufen (RNA binding protein) homolog 2 (Drosophila) Stau2  
 1425534\_at 0.78537 staufen (RNA binding protein) homolog 2 (Drosophila) Stau2  
 1425535\_at 0.83831 replication initiator 1 Repin1  
 1425536\_at 1.30666 syntaxin 3 Stx3  
 1425537\_at 1.10411 "protein phosphatase 1A, magnesium dependent, alpha isoform" Ppm1a  
 1425538\_x\_at 1.06451 CEA-related cell adhesion molecule 1 Ceacam1  
 1425539\_a\_at 0.97883 reticulon 3 Rtn3  
 1425540\_at 0.99790 ornithine transcarbamylase Otc  
 1425541\_at 1.01195 DEAD (Asp-Glu-Ala-Asp) box polypeptide 27 Ddx27  
 1425542\_a\_at 1.09644 "protein phosphatase 2, regulatory subunit B (B56), gamma isoform"  
 Ppp2r5c  
 1425543\_s\_at 0.76084 "pleckstrin homology domain containing, family A member 5" Plekha5  
 1425544\_at 0.88618 "pleckstrin homology domain containing, family A member 5" Plekha5  
 1425545\_x\_at 2.10424 "histocompatibility 2, D region locus 1" H2-D1  
 1425546\_a\_at 0.82632 transferrin Trf  
 1425547\_a\_at 0.89759 kinesin light chain 4 Klc4  
 1425548\_a\_at 1.07125 leukocyte specific transcript 1 Lst1  
 1425549\_at 1.15704 presenilin 1 Psen1

1425550\_a\_at 0.98235 "protein kinase, cAMP dependent regulatory, type I, alpha" Prkar1a  
 1425551\_at 0.86226 huntingtin interacting protein 1 related Hip1r  
 1425552\_at 0.94219 huntingtin interacting protein 1 related Hip1r  
 1425553\_s\_at 0.81963 huntingtin interacting protein 1 related Hip1r  
 1425554\_a\_at 1.01308 CDC16 cell division cycle 16 homolog (*S. cerevisiae*) Cdc16  
 1425555\_at 0.92760 "Cdc2-related kinase, arginine/serine-rich" Crkrs  
 1425556\_at 1.11113 "Cdc2-related kinase, arginine/serine-rich" Crkrs  
 1425557\_x\_at 0.90523 TSC22 domain family 3 Tsc22d3  
 1425558\_at 0.96304 kinesin light chain 3 Klc3  
 1425559\_a\_at 0.86682 acyl-CoA synthetase medium-chain family member 3 Acsm3  
 1425560\_a\_at 0.84986 S100 calcium binding protein A16 S100a16  
 1425561\_at 0.97144 "tRNA nucleotidyl transferase, CCA-adding, 1" Trnt1  
 1425562\_s\_at 0.97134 "tRNA nucleotidyl transferase, CCA-adding, 1" Trnt1  
 1425563\_s\_at 0.90199 protocadherin 10 Pcdh10  
 1425564\_at 0.81382 RE1-silencing transcription factor Rest  
 1425565\_at 0.96128 RE1-silencing transcription factor Rest  
 1425566\_at 0.94348 RE1-silencing transcription factor /// hypothetical protein LOC665152 ///  
 hypothetical protein LOC669155 Rest /// LOC665152 /// LOC669155  
 1425567\_a\_at 0.85866 annexin A5 Anxa5  
 1425568\_a\_at 1.01417 transmembrane protein 33 Tmem33  
 1425569\_a\_at 0.91276 signaling lymphocytic activation molecule family member 1 Slamf1  
 1425570\_at 0.98347 signaling lymphocytic activation molecule family member 1 Slamf1  
 1425571\_at 1.00137 signaling lymphocytic activation molecule family member 1 Slamf1  
 1425572\_a\_at 1.01648 development and differentiation enhancing Ddef1  
 1425573\_a\_at 1.02377 development and differentiation enhancing Ddef1  
 1425574\_at 1.00781 Eph receptor A3 Epha3  
 1425575\_at 0.92540 Eph receptor A3 Epha3  
 1425576\_at 0.99514 S-adenosylhomocysteine hydrolase-like 1 Ahcy11  
 1425577\_at 1.02016 RIKEN cDNA 9830124H08 gene 9830124H08Rik  
 1425578\_a\_at 0.98898 glial cell line derived neurotrophic factor family receptor alpha 2 Gfra2  
 1425579\_at 0.99337 glial cell line derived neurotrophic factor family receptor alpha 2 Gfra2  
 1425580\_a\_at 0.87612 "phosphoinositide-3-kinase, class 3" Pik3c3  
 1425581\_s\_at 1.31811 UDP-N-acetyl-alpha-D-galactosamine: polypeptide N-  
 acetylgalactosaminyltransferase 7 Galnt7  
 1425582\_a\_at 0.97888 endomucin Emcn  
 1425583\_at 0.94782 "Mammary gland RCB-0526 Jyg-MC(A) cDNA, RIKEN full-length enriched  
 library, clone:G830022P11 product:unclassifiable, full insert sequence" ---  
 1425584\_x\_at 0.89838 "Mammary gland RCB-0526 Jyg-MC(A) cDNA, RIKEN full-length enriched  
 library, clone:G830022P11 product:unclassifiable, full insert sequence" ---  
 1425585\_at 0.94934 "mediator of RNA polymerase II transcription, subunit 12 homolog (yeast)"  
 Med12  
 1425586\_a\_at 0.93364 melanophilin Mlph  
 1425587\_a\_at 1.08224 "protein tyrosine phosphatase, receptor type, J" Ptprij

1425588\_at 0.96190 "protein tyrosine phosphatase, receptor type, J" Ptpnj  
1425589\_at 0.83514 hydroxysteroid (17-beta) dehydrogenase 13 Hsd17b13  
1425590\_s\_at 0.98185 aryl hydrocarbon receptor-interacting protein-like 1 Aipl1  
1425591\_a\_at 1.08080 chromatin modifying protein 2A Chmp2a  
1425592\_at 1.06873 "transportin 2 (importin 3, karyopherin beta 2b)" Tnp2  
1425593\_at 1.08138 "transportin 2 (importin 3, karyopherin beta 2b)" Tnp2  
1425594\_at 0.84630 laminin gamma 3 Lamc3  
1425595\_at 0.96974 "gamma-aminobutyric acid (GABA-B) receptor, 1" Gabbr1  
1425596\_at 0.99934 expressed sequence AI317395 AI317395  
1425597\_a\_at 1.06323 quaking Qk  
1425598\_a\_at 1.07168 similar to Yamaguchi sarcoma viral (v-yes-1) oncogene homolog LOC676654  
1425599\_a\_at 0.93180 GATA zinc finger domain containing 1 Gatad1  
1425600\_a\_at 1.00757 "phospholipase C, beta 1" Plcb1  
1425601\_a\_at 0.91255 rhotekin Rtkn  
1425602\_a\_at 0.97633 "rabaptin, RAB GTPase binding effector protein 2" Rabep2  
1425603\_at 1.27999 RIKEN cDNA 0610011I04 gene 0610011I04Rik  
1425604\_at 1.09207 v-crk sarcoma virus CT10 oncogene homolog (avian)-like Crkl  
1425605\_a\_at 0.93351 limb region 1 Lmbr1  
1425606\_at 0.99924 "solute carrier family 5 (iodide transporter), member 8" Slc5a8  
1425607\_at 1.01683 holocarboxylase synthetase (biotin- [propionyl-Coenzyme A-carboxylase (ATP-hydrolysing)] ligase) Hlcs  
1425608\_at 0.95699 dual specificity phosphatase 3 (vaccinia virus phosphatase VH1-related) Dusp3  
1425609\_at 0.95036 neutrophil cytosolic factor 1 Ncf1  
1425610\_s\_at 0.78849 UDP-N-acetyl-alpha-D-galactosamine:polypeptide N-acetylgalactosaminyltransferase 2 Galnt2  
1425611\_a\_at 0.76800 cut-like 1 (Drosophila) Cutl1  
1425612\_at 0.97397 cut-like 1 (Drosophila) Cutl1  
1425613\_at 1.00609 protocadherin alpha 11 Pcdha11  
1425614\_x\_at 1.96110 "histocompatibility 2, D region locus 1" H2-D1  
1425615\_a\_at 0.99363 phosphoenolpyruvate carboxykinase 2 (mitochondrial) Pck2  
1425616\_a\_at 0.90184 coiled-coil domain containing 23 Ccdc23  
1425617\_at 1.18137 DEAH (Asp-Glu-Ala-His) box polypeptide 9 Dhx9  
1425618\_at 0.96818 DEAH (Asp-Glu-Ala-His) box polypeptide 9 Dhx9  
1425619\_s\_at 0.83593 desmoglein 2 Dsg2  
1425620\_at 0.79859 "transforming growth factor, beta receptor III" Tgfbr3  
1425621\_at 0.83210 tripartite motif-containing 35 Trim35  
1425622\_at 1.06738 EGF-like repeats and discoidin I-like domains 3 Edil3  
1425623\_a\_at 0.66224 cystathionine beta-synthase Cbs  
1425624\_at 0.86894 EPM2A (laforin) interacting protein 1 Epm2aip1  
1425625\_at 1.02285 "interleukin 13 receptor, alpha 1" Il13ra1  
1425626\_at 0.87020 "glutathione S-transferase, mu 1 /// similar to Glutathione S-transferase Mu 1 (GST class-mu 1) (Glutathione S-transferase GT8.7) (pmGT10) (GST 1-1) /// similar to Glutathione S-transferase Mu 1 (GST class-mu 1) (Glutathione S-transferase GT8.7) (pmGT10) (GST 1-1)" Gstm1 ///

LOC433943 /// LOC674086

1425627\_x\_at 0.82174 "glutathione S-transferase, mu 1 /// similar to Glutathione S-transferase Mu 1 (GST class-mu 1) (Glutathione S-transferase GT8.7) (pmGT10) (GST 1-1) /// similar to Glutathione S-transferase Mu 1 (GST class-mu 1) (Glutathione S-transferase GT8.7) (pmGT10) (GST 1-1)" Gstm1 /// LOC433943 /// LOC674086

1425628\_a\_at 0.86335 similar to General transcription factor II-I (GTFII-I) (TFII-I) (Bruton tyrosine kinase-associated protein 135) (BTK-associated protein 135) (BAP-135) LOC669007

1425629\_a\_at 1.04935 nucleolar protein family 6 (RNA-associated) Nol6

1425630\_at 0.89617 "transcriptional regulator, SIN3B (yeast)" Sin3b

1425631\_at 1.10489 "protein phosphatase 1, regulatory (inhibitor) subunit 3C" Ppp1r3c

1425632\_a\_at 0.98342 PQ loop repeat containing 2 Pqlc2

1425633\_at 0.93082 cDNA sequence BC026782 BC026782

1425634\_a\_at 0.90450 "tyrosine kinase, non-receptor, 1" Tnk1

1425635\_at 0.83957 "tyrosine kinase, non-receptor, 1" Tnk1

1425636\_at 1.05948 hedgehog acyltransferase Hhat

1425637\_at 0.91850 --- ---

1425638\_at 0.97097 "centaurin, alpha 2" Centa2

1425639\_at 0.91037 "centaurin, alpha 2" Centa2

1425640\_at 0.96511 "AF4/FMR2 family, member 1" Aff1

1425641\_at 1.02328 --- ---

1425642\_at 0.86955 centrosomal protein 290 Cep290

1425643\_at 0.99006 glycophorin A Gypa

1425644\_at 0.91097 leptin receptor Lepr

1425645\_s\_at 0.97876 "cytochrome P450, family 2, subfamily b, polypeptide 10" Cyp2b10

1425646\_at 1.09055 cDNA sequence BC016495 BC016495

1425647\_at 1.02827 tripartite motif-containing 60 Trim60

1425648\_at 0.89174 tripartite motif-containing 60 /// tripartite motif-containing 61 Trim60 /// Trim61

1425649\_at 0.90493 "solute carrier family 39 (zinc transporter), member 14" Slc39a14

1425650\_at 0.94403 "transducin-like enhancer of split 4, homolog of Drosophila E(spl)" Tle4

1425651\_at 0.97062 nonhomologous end-joining factor 1 Nhej1

1425652\_s\_at 0.86967 RNA binding protein gene with multiple splicing Rbpms

1425653\_at 1.00758 activating transcription factor 7 Atf7

1425654\_a\_at 0.93247 LIM domain and actin binding 1 Lima1

1425655\_at 0.96087 keratin associated protein 16-1 Krtap16-1

1425656\_a\_at 0.93056 brain-specific angiogenesis inhibitor 1-associated protein 2 Baiap2

1425657\_at 0.97700 RIKEN cDNA 1700016D06 gene 1700016D06Rik

1425658\_at 0.90930 CD109 antigen Cd109

1425659\_at 1.03113 target of myb1-like 2 (chicken) Tom112

1425660\_at 0.99626 BTB (POZ) domain containing 3 Btbd3

1425661\_at 0.93501 cytidine and dCMP deaminase domain containing 1 Cdadc1

1425662\_at 0.99236 cytidine and dCMP deaminase domain containing 1 Cdadc1

1425663\_at 0.91992 interleukin 1 receptor antagonist Il1rn

1425664\_at 1.08492 kelch-like 20 (Drosophila) Klhl20  
1425665\_a\_at 0.97685 signal recognition particle 54 /// similar to signal recognition particle 54  
Srp54 /// LOC665155  
1425666\_at 1.02215 similar to zinc finger protein of the cerebellum 5 LOC624168  
1425667\_at 1.17298 acyl-CoA thioesterase 11 Acot11  
1425668\_a\_at 0.91086 "ST3 beta-galactoside alpha-2,3-sialyltransferase 4" St3gal4  
1425669\_at 0.89634 "MOB1, Mps One Binder kinase activator-like 2B (yeast)" Mobk12b  
1425670\_at 0.88259 regulatory factor X-associated ankyrin-containing protein Rfxank  
1425671\_at 0.93635 homer homolog 1 (Drosophila) Homer1  
1425672\_a\_at 0.96249 "transient receptor potential cation channel, subfamily C, member 2" Trpc2  
1425673\_at 1.72086 LIM domain containing preferred translocation partner in lipoma Lpp  
1425674\_a\_at 1.08554 Ssu72 RNA polymerase II CTD phosphatase homolog (yeast) Ssu72  
1425675\_s\_at 0.87601 CEA-related cell adhesion molecule 1 Ceacam1  
1425676\_a\_at 1.13392 "elongation of very long chain fatty acids (FEN1/Elo2, SUR4/Elo3, yeast)-like  
1" Elovl1  
1425677\_a\_at 1.05786 "ankyrin 1, erythroid" Ank1  
1425678\_a\_at 0.81377 SNF related kinase Snrk  
1425679\_a\_at 0.77834 mitogen activated protein kinase 8 interacting protein 1 Mapk8ip1  
1425680\_a\_at 1.03821 beta-transducin repeat containing protein Btrc  
1425681\_a\_at 2.42038 prion protein dublet Prnd  
1425682\_a\_at 1.29393 Tp53rk binding protein Tprkb  
1425683\_at 1.02567 --- ---  
1425684\_at 0.98648 RIKEN cDNA 2310005E10 gene 2310005E10Rik  
1425685\_at 1.07561 RIKEN cDNA 2310005E10 gene 2310005E10Rik  
1425686\_at 1.11040 CASP8 and FADD-like apoptosis regulator Cflar  
1425687\_at 1.18785 CASP8 and FADD-like apoptosis regulator Cflar  
1425688\_a\_at 1.10847 dihydropyrimidinase Dpys  
1425689\_at 0.96481 dihydropyrimidinase Dpys  
1425690\_at 1.03704 "beta-1,3-glucuronyltransferase 1 (glucuronosyltransferase P)" B3gat1  
1425691\_at 1.01707 "beta-1,3-glucuronyltransferase 1 (glucuronosyltransferase P)" B3gat1  
1425692\_a\_at 1.03004 "dynein, axonemal, heavy chain 8" Dnahc8  
1425693\_at 1.11620 Braf transforming gene Braf  
1425694\_at 1.17014 T-box 5 Tbx5  
1425695\_at 0.92103 T-box 5 Tbx5  
1425696\_at 1.04984 thioredoxin-like 6 Txnl6  
1425697\_at 0.98197 serologically defined colon cancer antigen 1 Sdccag1  
1425698\_a\_at 0.84573 HCF-binding transcription factor Zhangfei Zf  
1425699\_a\_at 0.88244 abhydrolase domain containing 14A Abhd14a  
1425700\_at 1.02957 "glutamate receptor, metabotropic 1" Grm1  
1425701\_a\_at 0.94478 regulator of G-protein signaling 3 Rgs3  
1425702\_a\_at 0.76988 ectonucleotide pyrophosphatase/phosphodiesterase 5 Enpp5  
1425703\_at 0.86538 peroxisome proliferator activator receptor delta Ppard  
1425704\_at 0.88154 cDNA sequence BC022224 BC022224

1425705\_a\_at 0.83124 ERO1-like beta (*S. cerevisiae*) Ero1lb  
1425706\_a\_at 0.87776 damage specific DNA binding protein 2 Ddb2  
1425707\_a\_at 1.01779 "potassium inwardly-rectifying channel, subfamily J, member 6" Kcnj6  
1425708\_at 1.01286 ring finger protein 17 Rnf17  
1425709\_at 0.96122 ring finger protein 17 Rnf17  
1425710\_a\_at 0.90500 homer homolog 1 (*Drosophila*) Homer1  
1425711\_a\_at 0.99263 thymoma viral proto-oncogene 1 Akt1  
1425712\_at 1.07584 cDNA sequence BC025446 BC025446  
1425713\_a\_at 0.82942 ring finger protein 146 Rnf146  
1425714\_a\_at 1.05169 Nfat activating molecule with ITAM motif 1 Nfam1  
1425715\_at 0.86092 "interleukin 1 family, member 8" Il1f8  
1425716\_s\_at 1.00571 BCL2-antagonist/killer 1 Bak1  
1425717\_at 1.07212 LPS-responsive beige-like anchor Lrba  
1425718\_a\_at 0.77956 influenza virus NS1A binding protein Ivns1abp  
1425719\_a\_at 1.26129 N-myc (and STAT) interactor Nmi  
1425720\_at 0.92758 --- ---  
1425721\_at 0.85820 pleckstrin homology domain interacting protein Phip  
1425722\_at 1.03636 similar to interferon-inducible GTPase LOC435565  
1425723\_at 1.00791 "nuclear receptor subfamily 1, group I, member 2" Nr1i2  
1425724\_at 0.80627 "protein tyrosine phosphatase, receptor type, N polypeptide 2" Ptpn2  
1425725\_s\_at 0.86584 "Protein phosphatase 2, regulatory subunit B (B56), gamma isoform"  
Ppp2r5c  
1425726\_x\_at 0.91973 "protein phosphatase 2, regulatory subunit B (B56), gamma isoform"  
Ppp2r5c  
1425727\_at 0.99078 claudin 19 Cldn19  
1425728\_at 0.99320 hypothetical gene Rp23-14f5.7 RP23-14F5.7  
1425729\_at 0.99508 vitelliform macular dystrophy 2-like protein 1 Vmd211  
1425730\_at 0.99946 "calcium channel, voltage-dependent, gamma subunit 6" Cacng6  
1425731\_at 0.97740 ankyrin repeat domain 24 Ankrd24  
1425732\_a\_at 0.86091 Max interacting protein 1 Mxi1  
1425733\_a\_at 1.33040 epidermal growth factor receptor pathway substrate 8 Eps8  
1425734\_a\_at 1.10138 coiled-coil domain containing 77 Ccdc77  
1425735\_at 1.10919 MAP-kinase activating death domain Madd  
1425736\_at 0.98994 CD37 antigen Cd37  
1425737\_at 0.93610 --- ---  
1425738\_at 0.96629 immunoglobulin kappa chain variable 21 (V21)-12 /// similar to Ig kappa chain  
V-III region PC 6684 /// similar to Ig kappa chain V-III region PC 6684 Iggk-V21-12 /// LOC669090 ///  
LOC676193  
1425739\_at 0.83244 phospholipase D1 Pld1  
1425740\_at 1.05550 --- ---  
1425741\_at 0.90214 SLIT-ROBO Rho GTPase activating protein 3 Srgap3  
1425742\_a\_at 0.85033 "TSC22 domain family, member 1" Tsc22d1  
1425743\_at 0.99000 tripartite motif protein 7 Trim7

1425744\_a\_at 1.06318 mannoside acetylglucosaminyltransferase 5 Mgat5  
 1425745\_a\_at 0.86391 "transforming, acidic coiled-coil containing protein 2" Tacc2  
 1425746\_at 1.18980 RIKEN cDNA D730039F16 gene D730039F16Rik  
 1425747\_at 1.01127 RIKEN cDNA 1110060D06 gene /// dedicator of cytokinesis 5  
 1110060D06Rik /// Dock5  
 1425748\_at 0.91522 "DIRAS family, GTP-binding RAS-like 1" Diras1  
 1425749\_at 0.90182 syntaxin binding protein 6 (amisyn) Stxbp6  
 1425750\_a\_at 0.97313 Janus kinase 3 Jak3  
 1425751\_at 1.01522 cDNA sequence BC014805 BC014805  
 1425752\_at 0.93338 cDNA sequence BC014805 BC014805  
 1425753\_a\_at 0.90600 uracil DNA glycosylase Ung  
 1425754\_a\_at 0.97919 "butyrophilin, subfamily 1, member A1" Btn1a1  
 1425755\_at 1.11308 mature T-cell proliferation 1 Mtcp1  
 1425756\_at 0.91139 "Rab40b, member RAS oncogene family" Rab40b  
 1425757\_a\_at 1.09090 interphotoreceptor matrix proteoglycan 1 Impg1  
 1425758\_a\_at 1.24992 interphotoreceptor matrix proteoglycan 1 Impg1  
 1425759\_at 0.84722 NOBOX oogenesis homeobox Nobox  
 1425760\_a\_at 1.00337 phosphatidylinositol membrane-associated 1 Pitpm1  
 1425761\_a\_at 1.00099 "nuclear factor of activated T-cells, cytoplasmic, calcineurin-dependent 1"  
 Nfatc1  
 1425762\_a\_at 0.90188 retinoid X receptor alpha Rxra  
 1425763\_x\_at 1.01899 immunoglobulin heavy chain (J558 family) /// similar to immunoglobulin  
 heavy chain variable region /// similar to immunoglobulin mu-chain /// similar to anti-poly(dC)  
 monoclonal antibody heavy chain /// similar to Ig heavy chain V region 23 precursor /// similar to Ig  
 heavy chain V region 102 precursor /// similar to Ig heavy chain V region VH558 A1/A4 precursor Igh-  
 VJ558 /// LOC238447 /// LOC544903 /// LOC544907 /// LOC633774 /// LOC676478 /// LOC677563  
 1425764\_a\_at 1.00759 "branched chain aminotransferase 2, mitochondrial" Bcat2  
 1425765\_at 1.09333 "LOC622757 gene /// similar to transcription elongation factor B (SIII),  
 polypeptide 2" LOC622757 /// LOC676501  
 1425766\_x\_at 1.10003 "LOC622757 gene /// similar to transcription elongation factor B (SIII),  
 polypeptide 2" LOC622757 /// LOC676501  
 1425767\_a\_at 1.20028 sine oculis-related homeobox 4 homolog (Drosophila) Six4  
 1425768\_at 1.03318 diablo homolog (Drosophila) Diablo  
 1425769\_x\_at 1.09931 chemokine-like factor Cklf  
 1425770\_at 0.98877 RIKEN cDNA A730028G07 gene A730028G07Rik  
 1425771\_at 1.09963 "aldo-keto reductase family 1, member D1" Akr1d1  
 1425772\_at 0.52842 "procollagen, type IV, alpha 4" Col4a4  
 1425773\_s\_at 1.01496 nicotinamide nucleotide adenylyltransferase 1 Nmnat1  
 1425774\_at 0.79961 RIKEN cDNA 1500001A10 gene 1500001A10Rik  
 1425775\_at 1.08546 hypothetical gene MGC29393 MGC29393  
 1425776\_a\_at 0.87860 expressed sequence C87436 C87436  
 1425777\_at 1.02915 "calcium channel, voltage-dependent, beta 1 subunit" Cacnb1  
 1425778\_at 0.86815 RIKEN cDNA C230043N17 gene C230043N17Rik

1425779\_a\_at 1.02220 T-box 1 Tbx1  
1425780\_a\_at 1.02186 transmembrane protein 167 Tmem167  
1425781\_a\_at 1.03969 "phospholipase C, beta 1" Plcb1  
1425782\_at 0.93012 "phospholipase C, beta 1" Plcb1  
1425783\_at 1.02282 membrane targeting (tandem) C2 domain containing 1 Mtac2d1  
1425784\_a\_at 0.95115 olfactomedin 1 Olfm1  
1425785\_a\_at 0.91805 TXK tyrosine kinase Txk  
1425786\_a\_at 1.05263 heat shock transcription factor 4 Hsf4  
1425787\_a\_at 1.06568 synaptotagmin-like 3 Sytl3  
1425788\_a\_at 0.88662 enoyl Coenzyme A hydratase domain containing 2 Echdc2  
1425789\_s\_at 1.15201 annexin A8 Anxa8  
1425790\_a\_at 0.98935 "glutamate receptor, ionotropic, kainate 2 (beta 2)" Grik2  
1425791\_at 1.03727 paraoxonase 2 Pon2  
1425792\_a\_at 0.68771 RAR-related orphan receptor gamma Rorc  
1425793\_a\_at 0.89542 RAR-related orphan receptor gamma Rorc  
1425794\_at 1.21755 "polymerase (DNA directed), alpha 2" Pola2  
1425795\_a\_at 0.99633 mitogen activated protein kinase kinase kinase 7 Map3k7  
1425796\_a\_at 0.73735 fibroblast growth factor receptor 3 Fgfr3  
1425797\_a\_at 1.02483 spleen tyrosine kinase Syk  
1425798\_a\_at 0.99655 RecQ protein-like Recql  
1425799\_at 1.04280 flavin containing monooxygenase 4 Fmo4  
1425800\_at 0.96612 RAD9 homolog B (S. cerevisiae) Rad9b  
1425801\_x\_at 0.89727 coactosin-like 1 (Dictyostelium) Cotl1  
1425802\_a\_at 0.93909 Fc receptor-like A Fcrla  
1425803\_a\_at 0.97041 methyl-CpG binding domain protein 2 Mbd2  
1425804\_at 0.98575 H6 homeo box 2 Hmx2  
1425805\_a\_at 0.92747 ubiquitin specific peptidase 12 Usp12  
1425806\_a\_at 1.03226 SRB7 (suppressor of RNA polymerase B) homolog (S. cerevisiae) Surb7  
1425807\_at 0.92819 cDNA sequence BC021891 BC021891  
1425808\_a\_at 0.99087 myocardin Myocd  
1425809\_at 0.94710 "fatty acid binding protein 4, adipocyte" Fabp4  
1425810\_a\_at 0.80631 cysteine and glycine-rich protein 1 Csrp1  
1425811\_a\_at 0.90912 cysteine and glycine-rich protein 1 Csrp1  
1425812\_a\_at 0.97598 "calcium channel, voltage-dependent, N type, alpha 1B subunit" Cacna1b  
1425813\_at 0.94992 "phosphatidylinositol glycan anchor biosynthesis, class N" Pign  
1425814\_a\_at 0.97056 calcitonin receptor-like Calcrl  
1425815\_a\_at 0.94460 hyaluronan mediated motility receptor (RHAMM) Hmnr  
1425816\_at 0.87937 zinc finger protein 287 Zfp287  
1425817\_a\_at 1.03225 "solute carrier family 8 (sodium/calcium exchanger), member 1" Slc8a1  
1425818\_at 0.97556 --- ---  
1425819\_at 0.96274 zinc finger and BTB domain containing 7C Zbtb7c  
1425820\_x\_at 1.25619 G patch domain containing 4 Gpatc4  
1425821\_at 1.08227 chloride channel 7 Clcn7



1425822\_a\_at 1.06607 deltex 1 homolog (Drosophila) Dtx1  
1425823\_at 1.05915 cDNA sequence BC026782 /// similar to complement factor H-related protein B BC026782 /// LOC640602  
1425824\_a\_at 1.06939 proprotein convertase subtilisin/kexin type 4 Pcsk4  
1425825\_at 0.93379 RIKEN cDNA C230094A16 gene C230094A16Rik  
1425826\_a\_at 0.70146 sorbin and SH3 domain containing 1 Sorbs1  
1425827\_at 0.94143 "NK2 transcription factor related, locus 3 (Drosophila)" Nkx2-3  
1425828\_at 1.17334 "NK6 transcription factor related, locus 1 (Drosophila)" Nkx6-1  
1425829\_a\_at 1.07973 STEAP family member 4 Steap4  
1425830\_a\_at 0.98466 RIKEN cDNA 2810452K22 gene /// similar to cyclin-dependent kinase 2-interacting protein 2810452K22Rik /// LOC640972  
1425831\_at 1.18480 zinc finger protein 101 Zfp101  
1425832\_a\_at 1.09413 chemokine (C-X-C motif) receptor 6 Cxcr6  
1425833\_a\_at 0.90070 hippocalcin Hpca  
1425834\_a\_at 0.95721 "glycerol-3-phosphate acyltransferase, mitochondrial" Gpam  
1425835\_a\_at 0.99581 bobby sox homolog (Drosophila) Bbx  
1425836\_a\_at 1.03482 "LIM-domain containing, protein kinase" Limk1  
1425837\_a\_at 1.21401 CCR4 carbon catabolite repression 4-like (S. cerevisiae) Ccrn4l  
1425838\_at 1.23019 "ATPase, class II, type 9A" Atp9a  
1425839\_at 0.96183 FK506 binding protein 11 Fkbp11  
1425840\_a\_at 0.79977 "sema domain, immunoglobulin domain (Ig), short basic domain, secreted, (semaphorin) 3 F" Sema3f  
1425841\_at 0.89698 "solute carrier family 26, member 7" Slc26a7  
1425842\_at 0.95557 EGF-like repeats and discoidin I-like domains 3 Edil3  
1425843\_at 0.97866 mitochondrial ribosomal protein L33 Mrpl33  
1425844\_a\_at 0.91447 RNA guanylyltransferase and 5'-phosphatase Rngtt  
1425845\_a\_at 0.91877 soc-2 (suppressor of clear) homolog (C. elegans) Shoc2  
1425846\_a\_at 0.97437 calneuron 1 Caln1  
1425847\_a\_at 0.81456 RIKEN cDNA B230120H23 gene B230120H23Rik  
1425848\_a\_at 1.00971 dual specificity phosphatase 26 (putative) Dusp26  
1425849\_at 1.00087 "cholinergic receptor, nicotinic, beta polypeptide 4" Chrn4  
1425850\_a\_at 1.09628 NIMA (never in mitosis gene a)-related expressed kinase 6 /// similar to NIMA (never in mitosis gene a)-related expressed kinase 6 Nek6 /// LOC674247  
1425851\_a\_at 1.07203 adhesion molecule with Ig like domain 1 Amigo1  
1425852\_at 0.91353 RIKEN cDNA A230107C01 gene A230107C01Rik  
1425853\_s\_at 1.00900 prolactin receptor Prlr  
1425854\_x\_at 1.00429 "T-cell receptor beta, variable 13 /// similar to T-cell receptor beta-2 chain C region /// similar to T-cell receptor beta-1 chain C region /// similar to T-cell receptor beta-2 chain C region" Tcrb-V13 /// LOC665506 /// LOC669847 /// LOC674048  
1425855\_a\_at 0.98715 v-crk sarcoma virus CT10 oncogene homolog (avian) Crk  
1425856\_at 0.95398 Calcium and integrin binding 1 (calmyrin) Cib1  
1425857\_at 1.11982 F-box and WD-40 domain protein 9 Fbxw9  
1425858\_at 0.96879 "ubiquitin-conjugating enzyme E2M (UBC12 homolog, yeast)" Ube2m

1425859\_a\_at 1.11525 "proteasome (prosome, macropain) 26S subunit, non-ATPase, 4" Psm4  
 1425860\_x\_at 0.99462 chemokine-like factor Cklf  
 1425861\_x\_at 1.09076 "calcium channel, voltage-dependent, alpha2/delta subunit 1" Cacna2d1  
 1425862\_a\_at 0.92087 "phosphatidylinositol 3-kinase, C2 domain containing, alpha polypeptide"  
 Pik3c2a  
 1425863\_a\_at 0.90464 "protein tyrosine phosphatase, receptor type, O" Ptpro  
 1425864\_a\_at 1.01108 VPS10 domain receptor protein SORCS 1 Sorcs1  
 1425865\_a\_at 0.96990 "ligase III, DNA, ATP-dependent" Lig3  
 1425866\_a\_at 0.93690 "pleckstrin homology domain containing, family A (phosphoinositide binding  
 specific) member 4" Plekha4  
 1425867\_at 0.86579 "pleckstrin homology domain containing, family A (phosphoinositide binding  
 specific) member 4" Plekha4  
 1425868\_at 0.99504 "Histone 2, H2bb" Hist2h2bb  
 1425869\_a\_at 0.92496 presenilin 2 Psen2  
 1425870\_a\_at 1.09993 Kv channel-interacting protein 2 Kcnip2  
 1425871\_a\_at 1.23266 Similar to immunoglobulin light chain variable region LOC384413  
 1425872\_at 1.06341 keratin associated protein 6-1 Krtap6-1  
 1425873\_a\_at 1.13365 leptin receptor Lepr  
 1425874\_at 1.02922 homeo box C13 Hoxc13  
 1425875\_a\_at 1.06735 leptin receptor Lepr  
 1425876\_a\_at 1.05394 glucuronyl C5-epimerase Glce  
 1425877\_at 0.97565 hyaluronoglucosaminidase 3 Hyal3  
 1425878\_at 1.23704 calcium binding protein 4 Cabp4  
 1425879\_at 0.93352 zinc finger protein 352 Zfp352  
 1425880\_x\_at 1.02096 zinc finger protein 352 Zfp352  
 1425881\_at 1.37765 pregnancy-specific glycoprotein 28 Psg28  
 1425882\_at 1.03815 growth differentiation factor 2 Gdf2  
 1425883\_at 1.26300 "Smg-6 homolog, nonsense mediated mRNA decay factor (C. elegans)"  
 Smg6  
 1425884\_at 0.82937 brix domain containing 1 Bxdc1  
 1425885\_a\_at 0.94990 "potassium voltage-gated channel, shaker-related subfamily, beta member  
 2" Kcnab2  
 1425886\_at 0.90363 FEV (ETS oncogene family) Fev  
 1425887\_at 0.95459 RIKEN cDNA 4930511J11 gene 4930511J11Rik  
 1425888\_at 0.99937 "killer cell lectin-like receptor, subfamily A, member 17" Klra17  
 1425889\_at 0.97892 wingless-type MMTV integration site 9A Wnt9a  
 1425890\_at 1.05671 "lymphocyte antigen 6 complex, locus I" Ly6i  
 1425891\_a\_at 0.88365 GH regulated TBC protein 1 Grtp1  
 1425892\_a\_at 0.96040 prepronociceptin Pnoc  
 1425893\_a\_at 1.03030 fragile histidine triad gene Fhit  
 1425894\_at 0.95974 "MAS-related GPR, member F" Mrgprf  
 1425895\_a\_at 0.59093 inhibitor of DNA binding 1 Id1  
 1425896\_a\_at 0.94804 fibrillin 1 Fbn1

1425897\_at 1.03648 baculoviral IAP repeat-containing 1c Birc1c  
1425898\_x\_at 0.98291 olfactomedin 3 Olfm3  
1425899\_a\_at 1.07390 intersectin 1 (SH3 domain protein 1A) Itsn1  
1425900\_at 0.90124 hexokinase domain containing 1 Hkdc1  
1425901\_at 0.89173 "nuclear factor of activated T-cells, cytoplasmic, calcineurin-dependent 2"  
Nfatc2  
1425902\_a\_at 1.19293 "nuclear factor of kappa light polypeptide gene enhancer in B-cells 2, p49/  
p100" Nfkb2  
1425903\_at 0.83509 "sema domain, transmembrane domain (TM), and cytoplasmic domain,  
(semaphorin) 6A" Sema6a  
1425904\_at 0.89872 special AT-rich sequence binding protein 2 Satb2  
1425905\_at 1.05908 --- ---  
1425906\_a\_at 0.97435 "sema domain, immunoglobulin domain (Ig), short basic domain, secreted,  
(semaphorin) 3E" Sema3e  
1425907\_s\_at 0.93894 angiominin Amot  
1425908\_at 1.06860 "guanine nucleotide binding protein, beta 1" Gnb1  
1425909\_at 0.91369 CDNA clone MGC:11898 IMAGE:3598523 ---  
1425910\_at 0.99382 "DnaJ (Hsp40) homolog, subfamily C, member 2" Dnajc2  
1425911\_a\_at 0.83846 fibroblast growth factor receptor 1 Fgfr1  
1425912\_at 0.97873 centrosomal protein 164 Cep164  
1425913\_a\_at 0.94711 RIKEN cDNA 2810022L02 gene 2810022L02Rik  
1425914\_a\_at 1.07891 "armadillo repeat containing, X-linked 1" Armcx1  
1425915\_at 1.02039 "solute carrier family 26, member 8" Slc26a8  
1425916\_at 0.87571 calpain 8 Capn8  
1425917\_at 1.00421 histocompatibility 28 H28  
1425918\_at 0.99729 EGL nine homolog 3 (C. elegans) Egl3  
1425919\_at 1.34488 "NADH dehydrogenase (ubiquinone) 1 alpha subcomplex, 12" Ndufa12  
1425920\_at 1.18437 CUE domain containing 1 Cuedc1  
1425921\_a\_at 0.97825 RIKEN cDNA 1810055G02 gene 1810055G02Rik  
1425922\_a\_at 0.76901 "v-myc myelocytomatosis viral related oncogene, neuroblastoma derived  
(avian)" Mycn  
1425923\_at 0.98960 "v-myc myelocytomatosis viral related oncogene, neuroblastoma derived  
(avian)" Mycn  
1425924\_at 0.91106 MyoD family inhibitor Mdf1  
1425925\_at 0.97977 "Fc receptor, IgA, IgM, high affinity" Fcgr2  
1425926\_a\_at 1.10620 orthodenticle homolog 2 (Drosophila) Otx2  
1425927\_a\_at 1.02506 activating transcription factor 5 Atf5  
1425928\_at 0.96559 X Kell blood group precursor related family member 6 homolog Xkr6  
1425929\_a\_at 1.05548 ring finger protein 14 Rnf14  
1425930\_a\_at 1.01636 MAX-like protein X Mlx  
1425931\_a\_at 0.97370 aryl hydrocarbon receptor nuclear translocator-like 2 Arntl2  
1425932\_a\_at 1.15759 "CUG triplet repeat, RNA binding protein 1" Cugbp1  
1425933\_a\_at 0.93241 "5'-nucleotidase, cytosolic II" Nt5c2

1425934\_a\_at 1.10252 "UDP-Gal:betaGlcNAc beta 1,4-galactosyltransferase, polypeptide 4"  
 B4galt4  
 1425935\_at 1.04269 RIKEN cDNA 2900042B11 gene 2900042B11Rik  
 1425936\_a\_at 1.17396 ankyrin repeat and MYND domain containing 2 Ankmy2  
 1425937\_a\_at 1.02441 hexamethylene bis-acetamide inducible 1 Hexim1  
 1425938\_a\_at 1.00593 FK506 binding protein 11 Fkbp11  
 1425939\_at 0.99341 RAD50 homolog (*S. cerevisiae*) Rad50  
 1425940\_a\_at 0.73683 single-stranded DNA binding protein 3 Ssbp3  
 1425941\_a\_at 1.03225 cDNA sequence BC025462 BC025462  
 1425942\_a\_at 0.94264 glycoprotein m6b Gpm6b  
 1425943\_at 0.89085 neuromedin U receptor 2 Nmur2  
 1425944\_a\_at 0.91759 RAD51-like 3 (*S. cerevisiae*) Rad51l3  
 1425945\_at 1.04178 RIKEN cDNA 4933426I21 gene 4933426I21Rik  
 1425946\_at 1.02876 "glutathione S-transferase, mu 7" Gstm7  
 1425947\_at 0.92885 interferon gamma Ifng  
 1425948\_a\_at 0.92660 "solute carrier family 25, member 30" Slc25a30  
 1425949\_at 0.98442 "solute carrier family 25, member 30" Slc25a30  
 1425950\_at 0.99556 cDNA sequence BC019537 BC019537  
 1425951\_a\_at 0.98575 "C-type lectin domain family 4, member n" Clec4n  
 1425952\_a\_at 1.08466 glucagon Gcg  
 1425953\_at 0.97000 Dynein cytoplasmic 1 light intermediate chain 1 Dync1li1  
 1425954\_a\_at 0.96549 apurinic/aprimidinic endonuclease 2 Apex2  
 1425955\_at 1.03859 caveolin 2 Cav2  
 1425956\_a\_at 0.91398 cytidine and dCMP deaminase domain containing 1 Cdadc1  
 1425957\_x\_at 0.91624 RIKEN cDNA 1700021K02 gene 1700021K02Rik  
 1425958\_at 0.89861 "interleukin 1 family, member 9" Il1f9  
 1425959\_x\_at 1.02522 "killer cell lectin-like receptor, subfamily A, member 1 /// killer cell lectin-like  
 receptor subfamily A, member 12 /// killer cell lectin-like receptor subfamily A, member 13 /// killer cell  
 lectin-like receptor, subfamily A, member 4 /// killer cell lectin-like receptor, subfamily A, member  
 15 /// killer cell lectin-like receptor, subfamily A, member 16 /// killer cell lectin-like receptor subfamily  
 A, member 23 /// killer cell lectin-like receptor subfamily A, member 20 /// killer cell lectin-like receptor  
 subfamily A, member 22 /// killer cell lectin-like receptor, subfamily A, member 18 /// similar to Killer  
 cell lectin-like receptor 4 (T-cell surface glycoprotein Ly-49D) (Ly49-D antigen) (Lymphocyte antigen  
 49D) /// Ly49p/d /// similar to killer cell lectin-like receptor, subfamily A, member 16 /// killer cell lectin-  
 like receptor subfamily A member 33 /// similar to killer cell lectin-like receptor, subfamily A, member  
 18 /// similar to killer cell lectin-like receptor subfamily A, member 13" Klra1 /// Klra12 /// Klra13 ///  
 Klra4 /// Klra15 /// Klra16 /// Klra23 /// Klra20 /// Klra22 /// Klra18 /// LOC634585 /// LOC635513 ///  
 LOC640058 /// Klra33 /// LOC667764 /// LOC673407  
 1425960\_s\_at 0.97339 paired box gene 6 Pax6  
 1425961\_at 0.99493 cDNA sequence BC016548 BC016548  
 1425962\_at 0.96310 killer cell lectin-like receptor subfamily B member 1F Klrb1f  
 1425963\_at 0.86621 calcium binding protein 7 Cabp7  
 1425964\_x\_at 0.66481 heat shock protein 1 Hspb1

1425965\_at 0.79839 ubiquitin C Ubc  
1425966\_x\_at 0.84548 ubiquitin C Ubc  
1425967\_a\_at 0.88526 mast cell protease 4 Mcpt4  
1425968\_s\_at 0.86393 SPEG complex locus Speg  
1425969\_a\_at 1.07246 Huntington disease gene homolog Hdh  
1425970\_a\_at 1.12079 Ros1 proto-oncogene Ros1  
1425971\_at 1.03740 (ORF 1) and reverse transcriptase (ORF 2) genes ---  
1425972\_a\_at 1.04398 zinc finger protein X-linked Zfx  
1425973\_at 0.90382 lysosomal trafficking regulator Lyst  
1425974\_a\_at 1.05397 tripartite motif protein 25 Trim25  
1425975\_a\_at 0.90548 mitogen-activated protein kinase 8 interacting protein 3 Mapk8ip3  
1425976\_x\_at 1.04831 zinc finger protein 353 Zfp353  
1425977\_a\_at 1.02545 STE20-like kinase (yeast) Slk  
1425978\_at 0.90876 myocardin Myocd  
1425979\_a\_at 0.88116 Fas (TNFRSF6) binding factor 1 Fbf1  
1425980\_at 0.98617 WD repeat domain 54 Wdr54  
1425981\_a\_at 0.96789 retinoblastoma-like 2 /// similar to retinoblastoma-like 2 Rbl2 ///  
LOC635075  
1425982\_a\_at 0.88776 Werner syndrome homolog (human) Wrn  
1425983\_x\_at 0.76888 homeodomain interacting protein kinase 2 Hipk2  
1425984\_at 1.01171 "procollagen, type V, alpha 3" Col5a3  
1425985\_s\_at 0.62027 mannan-binding lectin serine peptidase 1 Masp1  
1425986\_a\_at 0.89480 "DCUN1D1 DCN1, defective in cullin neddylation 1, domain containing 1 (S. cerevisiae)" Dcun1d1  
1425987\_a\_at 0.93409 "potassium large conductance calcium-activated channel, subfamily M, alpha member 1" Kcnma1  
1425988\_a\_at 0.88695 homeodomain interacting protein kinase 1 /// similar to homeodomain-interacting protein kinase 1 Hipk1 /// LOC634033  
1425989\_a\_at 1.05407 eyes absent 3 homolog (Drosophila) Eya3  
1425990\_a\_at 0.98867 "nuclear factor of activated T-cells, cytoplasmic, calcineurin-dependent 2" Nfatc2  
1425991\_a\_at 0.95752 ankyrin repeat domain 25 Ankrd25  
1425992\_at 0.88162 "solute carrier family 6 (neurotransmitter transporter, glycine), member 5" Slc6a5  
1425993\_a\_at 0.94915 heat shock protein 110 Hsp110  
1425994\_a\_at 0.99179 N-acylsphingosine amidohydrolase 2 Asah2  
1425995\_s\_at 1.06524 Wilms tumor homolog Wt1  
1425996\_a\_at 0.77872 "SWI/SNF related, matrix associated, actin dependent regulator of chromatin, subfamily a, member 3" Smarca3  
1425997\_a\_at 0.93286 "phosphatidylinositol glycan anchor biosynthesis, class N" Pign  
1425998\_at 0.96678 synaptotagmin-like 4 Sytl4  
1425999\_at 0.91980 complement factor H-related protein LOC214403  
1426000\_at 0.91712 oxytocin receptor Oxt

|              |         |                                                                                                |               |
|--------------|---------|------------------------------------------------------------------------------------------------|---------------|
| 1426001_at   | 1.00497 | eomesodermin homolog ( <i>Xenopus laevis</i> )                                                 | Eomes         |
| 1426002_a_at | 1.11076 | cell division cycle 7 ( <i>S. cerevisiae</i> )                                                 | Cdc7          |
| 1426003_at   | 0.96405 | "neurotrophic tyrosine kinase, receptor, type 3"                                               | Ntrk3         |
| 1426004_a_at | 0.89870 | "transglutaminase 2, C polypeptide"                                                            | Tgm2          |
| 1426005_at   | 0.91215 | dentin matrix protein 1                                                                        | Dmp1          |
| 1426006_at   | 0.94409 | "potassium voltage-gated channel, subfamily Q, member 2"                                       | Kcnq2         |
| 1426007_a_at | 0.97615 | UBX domain containing 3                                                                        | Ubx3          |
| 1426008_a_at | 0.90804 | "solute carrier family 7 (cationic amino acid transporter, y+ system), member 2"               | Slc7a2        |
| 1426009_a_at | 1.15056 | "phosphatidylinositol-4-phosphate 5-kinase, type 1 beta"                                       | Pip5k1b       |
| 1426010_a_at | 0.92459 | erythrocyte protein band 4.1-like 3                                                            | Epb4.113      |
| 1426011_a_at | 1.08917 | gametogenetin binding protein 2                                                                | Ggnbp2        |
| 1426012_a_at | 0.98994 | RIKEN cDNA 2610301G19 gene                                                                     | 2610301G19Rik |
| 1426013_s_at | 1.00864 | "pleckstrin homology domain containing, family A (phosphoinositide binding specific) member 4" | Plekha4       |
| 1426014_a_at | 1.09084 | mucin and cadherin like                                                                        | Mucdhl        |
| 1426015_s_at | 0.86115 | aspartate-beta-hydroxylase                                                                     | Asph          |
| 1426016_a_at | 1.12696 | trophinin                                                                                      | Tro           |
| 1426017_a_at | 1.05971 | RIKEN cDNA 0610011L14 gene                                                                     | 0610011L14Rik |
| 1426018_a_at | 1.01780 | SRY-box containing gene 6                                                                      | Sox6          |
| 1426019_at   | 1.04757 | "phospholipase A2, activating protein"                                                         | Plaa          |
| 1426020_at   | 1.06205 | thymopoietin                                                                                   | Tmpo          |
| 1426021_a_at | 0.98423 | cell division cycle 7 ( <i>S. cerevisiae</i> )                                                 | Cdc7          |
| 1426022_a_at | 0.97996 | villin-like                                                                                    | Vill          |
| 1426023_a_at | 1.01873 | "rabaptin, RAB GTPase binding effector protein 1"                                              | Rabep1        |
| 1426024_a_at | 0.80027 | drebrin 1                                                                                      | Dbn1          |
| 1426025_s_at | 0.97043 | lysosomal-associated protein transmembrane 5                                                   | Laptn5        |
| 1426026_at   | 0.97183 | PRP6 pre-mRNA splicing factor 6 homolog (yeast)                                                | Prpf6         |
| 1426027_a_at | 0.83080 | Rho GTPase activating protein 10                                                               | Arhgap10      |
| 1426028_a_at | 0.77895 | citron                                                                                         | Cit           |
| 1426029_a_at | 0.81925 | nuclear factor of activated T-cells 5                                                          | Nfat5         |
| 1426030_a_at | 0.86622 | acylpeptide hydrolase                                                                          | Apeh          |
| 1426031_a_at | 0.99396 | "nuclear factor of activated T-cells, cytoplasmic, calcineurin-dependent 2"                    | Nfatc2        |
| 1426032_at   | 0.91166 | "nuclear factor of activated T-cells, cytoplasmic, calcineurin-dependent 2"                    | Nfatc2        |
| 1426033_at   | 0.95767 | regulator of G-protein signaling 9                                                             | Rgs9          |
| 1426034_a_at | 1.05744 | runt related transcription factor 2                                                            | Runx2         |
| 1426035_at   | 0.97732 | hypothetical LOC574418                                                                         | LOC574418     |
| 1426036_a_at | 0.95547 | phosphodiesterase 1C                                                                           | Pde1c         |
| 1426037_a_at | 1.03357 | regulator of G-protein signaling 16                                                            | Rgs16         |
| 1426038_at   | 1.04894 | ---                                                                                            | ---           |
| 1426039_a_at | 0.88381 | "arachidonate lipoxygenase, epidermal"                                                         | Alox12e       |

1426040\_a\_at 1.16643 outer dense fiber of sperm tails 2 Odf2  
 1426041\_a\_at 0.96794 "FYVE, RhoGEF and PH domain containing 4" Fgd4  
 1426042\_at 0.88391 "FYVE, RhoGEF and PH domain containing 4" Fgd4  
 1426043\_a\_at 0.75751 calpain 3 Capn3  
 1426044\_a\_at 0.85746 "protein kinase C, theta" Prkcq  
 1426045\_at 0.93461 kininogen 1 Kng1  
 1426046\_a\_at 1.19172 "Rab geranylgeranyl transferase, a subunit" Rabggta  
 1426047\_a\_at 1.00580 "protein tyrosine phosphatase, receptor type, R" Ptprr  
 1426048\_s\_at 0.97574 "histidine rich calcium binding protein /// transcription factor AP-2, alpha"  
 Hrc /// Tcfap2a  
 1426049\_a\_at 0.95820 --- ---  
 1426050\_at 0.89451 Bcl2-like 1 Bcl2l1  
 1426051\_a\_at 1.16510 centromere protein B Cenpb  
 1426052\_at 0.83128 mutL homolog 3 (E coli) Mlh3  
 1426053\_a\_at 0.92419 xenotropic and polytropic retrovirus receptor 1 Xpr1  
 1426054\_at 0.96368 neuropeptide Y receptor Y1 Npy1r  
 1426055\_a\_at 0.96083 "phosphatidylinositol glycan anchor biosynthesis, class Q" Pigq  
 1426056\_at 1.01594 "phosphatidylinositol glycan anchor biosynthesis, class Q" Pigq  
 1426057\_a\_at 0.92362 Eph receptor A3 Epha3  
 1426058\_a\_at 0.98480 "potassium channel, subfamily K, member 3" Kcnk3  
 1426059\_at 0.94052 glucokinase regulatory protein Gckr  
 1426060\_at 1.26939 --- ---  
 1426061\_x\_at 1.13292 --- ---  
 1426062\_a\_at 0.91115 caspase 7 Casp7  
 1426063\_a\_at 0.89126 GTP binding protein (gene overexpressed in skeletal muscle) Gem  
 1426064\_at 1.01033 "cytochrome P450, family 3, subfamily a, polypeptide 44" Cyp3a44  
 1426065\_a\_at 1.27316 tribbles homolog 3 (Drosophila) Trib3  
 1426066\_a\_at 1.01429 dystrobrevin alpha Dtna  
 1426067\_x\_at 1.00094 chaperonin subunit 3 (gamma) Cct3  
 1426068\_at 0.91185 "solute carrier family 7 (cationic amino acid transporter, y+ system), member  
 4" Slc7a4  
 1426069\_s\_at 0.88588 "solute carrier family 7 (cationic amino acid transporter, y+ system), member  
 4" Slc7a4  
 1426070\_a\_at 0.82684 "potassium voltage-gated channel, Shal-related family, member 3" Kcnd3  
 1426071\_at 1.05082 TGF-beta1-induced anti-apoptotic factor 2 Tiaf2  
 1426072\_at 0.99982 chemokine-like receptor 1 Cmk1r1  
 1426073\_at 1.07896 twisted gastrulation homolog 1 (Drosophila) Twsg1  
 1426074\_at 0.93327 LOC434536 LOC434536  
 1426075\_at 1.03199 klotho beta Klb  
 1426076\_at 0.87250 cell division cycle 27 homolog (S. cerevisiae) Cdc27  
 1426077\_at 0.89733 "monooxygenase, DBH-like 2" Moxd2  
 1426078\_a\_at 0.91812 G protein-coupled receptor 108 Gpr108  
 1426079\_at 1.01922 CD247 antigen Cd247

1426080\_a\_at 0.90787 "potassium voltage-gated channel, subfamily Q, member 2" Kcnq2  
 1426081\_a\_at 1.07821 "deiodinase, iodothyronine, type II" Dio2  
 1426082\_a\_at 0.85967 "solute carrier family 16 (monocarboxylic acid transporters), member 4"  
 Slc16a4  
 1426083\_a\_at 0.92854 "B-cell translocation gene 1, anti-proliferative" Btg1  
 1426084\_a\_at 0.97467 torsin A interacting protein 1 Tor1aip1  
 1426085\_a\_at 0.90406 paxillin Pxn  
 1426086\_a\_at 0.92063 fragile X mental retardation syndrome 1 homolog Fmr1  
 1426087\_at 1.11769 icos ligand Icosl  
 1426088\_at 1.05654 --- ---  
 1426089\_a\_at 0.98042 cDNA sequence BC003331 BC003331  
 1426090\_a\_at 1.09303 "fer (fms/fps related) protein kinase, testis specific 2" Fert2  
 1426091\_a\_at 1.04075 wingless related MMTV integration site 10b Wnt10b  
 1426092\_a\_at 0.91797 tripartite motif protein 34 Trim34  
 1426093\_at 0.93829 tripartite motif protein 34 Trim34  
 1426094\_at 1.02636 "rhomboid, veinlet-like 1 (Drosophila)" Rhbdl1  
 1426095\_a\_at 1.21120 "tumor necrosis factor receptor superfamily, member 22" Tnfrsf22  
 1426096\_at 0.90431 protein arginine N-methyltransferase 7 Prmt7  
 1426097\_a\_at 1.00673 coiled-coil domain containing 106 Ccdc106  
 1426098\_a\_at 1.08072 calpastatin Cast  
 1426099\_at 1.01880 histamine H4 receptor Hrh4  
 1426100\_a\_at 0.91994 "thymidine kinase 2, mitochondrial" Tk2  
 1426101\_at 0.99525 ORFs (putative primordial protein) ---  
 1426102\_at 0.95679 "cytochrome P450, family 2, subfamily j, polypeptide 13" Cyp2j13  
 1426103\_a\_at 0.98455 estrogen receptor 2 (beta) Esr2  
 1426104\_at 0.98759 mitogen activated protein kinase 14 Mapk14  
 1426105\_a\_at 0.88600 UBX domain containing 5 Ubx5  
 1426106\_a\_at 0.98337 synaptotagmin VI Syt6  
 1426107\_at 0.93580 VPR domain containing 9 Prdm9  
 1426108\_s\_at 0.95606 "calcium channel, voltage-dependent, beta 1 subunit" Cacnb1  
 1426109\_a\_at 1.03233 "solute carrier family 14 (urea transporter), member 2" Slc14a2  
 1426110\_a\_at 0.93991 "endothelial differentiation, lysophosphatidic acid G-protein-coupled receptor,  
 2" Edg2  
 1426111\_x\_at 0.90772 interferon regulatory factor 3 Irf3  
 1426112\_a\_at 0.90187 CD72 antigen Cd72  
 1426113\_x\_at 0.89445 T-cell receptor alpha chain /// RIKEN cDNA A430107P09 gene Tcra ///  
 A430107P09Rik  
 1426114\_at 0.93748 heterogeneous nuclear ribonucleoprotein A/B Hnripab  
 1426115\_a\_at 0.83965 "potassium inwardly-rectifying channel, subfamily J, member 9" Kcnj9  
 1426116\_at 0.91350 ankyrin repeat and SOCS box-containing 18 Asb18  
 1426117\_a\_at 1.18921 "solute carrier family 19 (thiamine transporter), member 2" Slc19a2  
 1426118\_a\_at 1.07194 translocase of outer mitochondrial membrane 40 homolog (yeast) Tomm40  
 1426119\_at 1.00590 "thymidylate synthase, pseudogene" Tyms-ps



1426120\_a\_at 1.04545 CD244 natural killer cell receptor 2B4 /// similar to Natural killer cell receptor 2B4 precursor (NKR2B4) (NK cell type I receptor protein 2B4) (CD244 antigen) (Non MHC restricted killing associated) Cd244 /// LOC677008  
 1426121\_at 0.86115 "MAS-related GPR, member A3" Mrgpra3  
 1426122\_a\_at 0.77711 "coronin, actin binding protein 6" Coro6  
 1426123\_a\_at 1.32850 ribosome binding protein 1 Rrbp1  
 1426124\_a\_at 1.17107 CDC-like kinase 1 Clk1  
 1426125\_a\_at 0.88017 caspase 9 Casp9  
 1426126\_a\_at 0.90701 hypothetical protein MGC30332 MGC30332  
 1426127\_x\_at 0.91012 "killer cell lectin-like receptor, subfamily A, member 18" Klra18  
 1426128\_a\_at 1.00473 "potassium voltage-gated channel, subfamily Q, member 2" Kcnq2  
 1426129\_at 1.04544 breast cancer metastasis-suppressor 1 Brms1  
 1426130\_at 0.94021 thioredoxin-like 6 Txnl6  
 1426131\_at 1.03033 RIKEN cDNA 1700036D21 gene 1700036D21Rik  
 1426132\_at 0.98008 --- ---  
 1426133\_a\_at 1.20169 "MIT, microtubule interacting and transport, domain containing 1" Mitd1  
 1426134\_at 1.01093 triadin Trdn  
 1426135\_a\_at 0.97505 parkin Park2  
 1426136\_x\_at 0.94057 "killer cell lectin-like receptor subfamily A, member 21" Klra21  
 1426137\_at 1.04703 reduced expression 2 Rex2  
 1426138\_a\_at 1.04319 "ubiquitin-conjugating enzyme E2, J2 homolog (yeast)" Ube2j2  
 1426139\_a\_at 1.02523 chemokine (C-C motif) receptor-like 1 Ccr1  
 1426140\_x\_at 1.00907 "killer cell lectin-like receptor, subfamily A, member 19" Klra19  
 1426141\_at 0.89558 "MAS-related GPR, member A1" Mrgpra1  
 1426142\_a\_at 1.07823 triadin Trdn  
 1426143\_at 1.03493 triadin Trdn  
 1426144\_x\_at 0.94525 triadin Trdn  
 1426145\_at 0.91442 --- ---  
 1426146\_a\_at 0.96269 choline phosphotransferase 1 Chpt1  
 1426147\_s\_at 0.96864 claudin 10 Cldn10  
 1426148\_at 0.81040 "globoside alpha-1,3-N-acetylgalactosaminyltransferase 1" Gbgt1  
 1426149\_at 0.90328 serine protease inhibitor 15 Spi15  
 1426150\_at 0.91665 "GIPC PDZ domain containing family, member 3" Gipc3  
 1426151\_a\_at 1.04886 syntaxin 3 Stx3  
 1426152\_a\_at 0.99376 kit ligand Kitl  
 1426153\_a\_at 0.99219 desmoglein 2 Dsg2  
 1426154\_s\_at 0.99349 major urinary protein 1 /// major urinary protein 3 Mup1 /// Mup3  
 1426155\_a\_at 1.01329 odd-skipped related 2 (Drosophila) Osr2  
 1426156\_at 0.95039 large tumor suppressor 2 Lats2  
 1426157\_a\_at 0.91244 CD209b antigen Cd209b  
 1426158\_at 0.99925 "T-cell receptor beta, variable 13" Tcrb-V13  
 1426159\_x\_at 1.01651 "T-cell receptor beta, variable 13" Tcrb-V13  
 1426160\_a\_at 0.96510 serine/threonine kinase 16 Stk16

1426161\_at 1.03299 --- ---  
1426162\_a\_at 1.02169 ribosomal protein L7 Rpl7  
1426163\_x\_at 1.04635 ribosomal protein L7 Rpl7  
1426164\_a\_at 0.87659 upstream transcription factor 1 Usf1  
1426165\_a\_at 1.00470 caspase 3 Casp3  
1426166\_at 0.80472 major urinary protein 5 Mup5  
1426167\_a\_at 0.91533 calcium/calmodulin-dependent protein kinase IV Camk4  
1426168\_a\_at 0.85941 T-cell receptor alpha chain /// RIKEN cDNA A130082M07 gene /// RIKEN  
cDNA A430107P09 gene Tcra /// A130082M07Rik /// A430107P09Rik  
1426169\_a\_at 1.02388 "linker for activation of T cells family, member 2" Lat2  
1426170\_a\_at 0.93650 "CD8 antigen, beta chain 1" Cd8b1  
1426171\_x\_at 0.93778 "killer cell lectin-like receptor, subfamily A, member 7" Klra7  
1426172\_a\_at 1.00460 CD209a antigen Cd209a  
1426173\_at 1.07672 "Cytochrome P450, family 51" Cyp51  
1426174\_s\_at 1.07094 Immunoglobulin heavy chain (gamma polypeptide) Ighg  
1426175\_a\_at 1.01153 tryptase alpha/beta 1 Tpsab1  
1426176\_a\_at 0.93874 prokineticin 2 Prok2  
1426177\_a\_at 1.00504 "NK1 transcription factor related, locus 2 (Drosophila)" Nkx1-2  
1426178\_at 1.07317 Immunoglobulin kappa chain complex ---  
1426179\_a\_at 0.81129 twisted gastrulation homolog 1 (Drosophila) Twsg1  
1426180\_a\_at 0.92167 submaxillary gland androgen regulated protein 2 Smr2  
1426181\_a\_at 1.08015 interleukin 24 Il24  
1426182\_a\_at 1.03229 "killer cell lectin-like receptor subfamily C, member 1" Klrc1  
1426183\_a\_at 0.86372 CD209d antigen Cd209d  
1426184\_a\_at 1.00736 programmed cell death 6 interacting protein Pdc6ip  
1426185\_at 1.03535 "calcium channel, voltage-dependent, alpha 2/delta subunit 2" Cacna2d2  
1426186\_a\_at 0.94442 fibroblast growth factor 5 Fgf5  
1426187\_a\_at 1.11026 HCLS1 associated X-1 Hax1  
1426188\_s\_at 0.92688 cDNA sequence BC005685 BC005685  
1426189\_at 1.08267 dual specificity phosphatase-like 15 Dusp15  
1426190\_at 1.08436 activator of yeast meiotic promoters 1 Aym1  
1426191\_a\_at 0.87845 Bcl2-like 1 Bcl2l1  
1426192\_at 0.81738 "SWI/SNF related, matrix associated, actin dependent regulator of chromatin,  
subfamily d, member 2" Smardc2  
1426193\_at 1.07084 otospiralin Otos  
1426194\_x\_at 0.94966 "REV3-like, catalytic subunit of DNA polymerase zeta RAD54 like (S.  
cerevisiae)" Rev3l  
1426195\_a\_at 0.87681 cystatin C Cst3  
1426196\_at 0.89371 Immunoglobulin heavy chain 1a (serum IgG2a) Igh-1a  
1426197\_at 1.06906 Anti-human CD20 antibody 1F5 gamma heavy chain variable region ---  
1426198\_at 1.16510 Anti-human CD37 antibody WR17 gamma heavy chain variable region ---  
1426199\_x\_at 0.86434 Anti-human CD37 antibody WR17 gamma heavy chain variable region ---  
1426200\_at 0.97730 Immunoglobulin kappa chain complex ---

1426201\_at 0.83167 "Gene model 1499, (NCBI)" Gm1499  
1426202\_at 0.99967 "Histocompatibility 2, class II antigen E alpha /// MHC class II E-sub-alpha (E-sub-alpha) mRNA, 5' flanking region and partial cds" H2-Ea  
1426203\_at 1.00215 keratin associated protein 16-4 Krtap16-4  
1426204\_a\_at 1.03235 opioid receptor-like 1 Oprl1  
1426205\_at 0.93802 "protein phosphatase 1, catalytic subunit, beta isoform" Ppp1cb  
1426206\_at 1.03780 roundabout homolog 4 (Drosophila) Robo4  
1426207\_at 0.96696 inhibitor of kappaB kinase beta Ikbkb  
1426208\_x\_at 1.11247 pleiomorphic adenoma gene-like 1 Plagl1  
1426209\_at 0.95446 "striatin, calmodulin binding protein 4" Strn4  
1426210\_x\_at 1.12749 "poly (ADP-ribose) polymerase family, member 3" Parp3  
1426211\_at 0.96530 transmembrane protein 161A Tmem161a  
1426212\_s\_at 0.94058 transmembrane protein 161A Tmem161a  
1426213\_at 0.98378 "IMP4, U3 small nucleolar ribonucleoprotein, homolog (yeast)" Imp4  
1426214\_at 0.99435 "IMP4, U3 small nucleolar ribonucleoprotein, homolog (yeast)" Imp4  
1426215\_at 0.66404 dopa decarboxylase Ddc  
1426216\_at 0.97097 component of oligomeric golgi complex 6 Cog6  
1426217\_at 0.94211 RIKEN cDNA 2810441K11 gene 2810441K11Rik  
1426218\_at 0.89092 glucocorticoid induced transcript 1 Glcci1  
1426219\_at 0.97599 "sterol carrier protein 2, liver" Scp2  
1426220\_at 0.98137 RIKEN cDNA 4930471M23 gene 4930471M23Rik  
1426221\_at 0.85343 "loss of heterozygosity, 11, chromosomal region 2, gene A homolog (human)" Loh11cr2a  
1426222\_s\_at 0.97735 "loss of heterozygosity, 11, chromosomal region 2, gene A homolog (human)" Loh11cr2a  
1426223\_at 0.83999 RIKEN cDNA 2810439F02 gene 2810439F02Rik  
1426224\_x\_at 1.03324 CKLF-like MARVEL transmembrane domain containing 2A Cmtm2a  
1426225\_at 0.95888 "retinol binding protein 4, plasma" Rbp4  
1426226\_at 0.90766 dual-specificity tyrosine-(Y)-phosphorylation regulated kinase 1a Dyrk1a  
1426227\_s\_at 0.96178 vacuolar protein sorting 37C (yeast) Vps37c  
1426228\_at 0.91182 v-Ki-ras2 Kirsten rat sarcoma viral oncogene homolog Kras  
1426229\_s\_at 0.83413 v-Ki-ras2 Kirsten rat sarcoma viral oncogene homolog Kras  
1426230\_at 1.06724 sphingosine kinase 2 Sphk2  
1426231\_at 0.98318 vitrin Vit  
1426232\_at 1.05844 cDNA sequence BC024479 BC024479  
1426233\_at 0.89560 mitogen activated protein kinase kinase 4 Map2k4  
1426234\_s\_at 1.08862 cDNA sequence BC002199 BC002199  
1426235\_a\_at 0.82473 glutamate-ammonia ligase (glutamine synthetase) Glul  
1426236\_a\_at 0.79571 glutamate-ammonia ligase (glutamine synthetase) Glul  
1426237\_at 0.91376 Sp2 transcription factor Sp2  
1426238\_at 0.92478 bone morphogenetic protein 1 Bmp1  
1426239\_s\_at 1.01894 "arrestin, beta 2" Arrb2  
1426240\_at 1.01537 chromatin modifying protein 4B Chmp4b

1426241\_a\_at 0.87201 sex comb on midleg homolog 1 Scmh1  
 1426242\_at 0.98769 polymerase (RNA) II (DNA directed) polypeptide A Polr2a  
 1426243\_at 0.98429 cystathionase (cystathionine gamma-lyase) Cth  
 1426244\_at 1.00018 "microtubule-associated protein, RP/EB family, member 2" Mapre2  
 1426245\_s\_at 0.89802 "microtubule-associated protein, RP/EB family, member 2" Mapre2  
 1426246\_at 0.84940 protein S (alpha) Pros1  
 1426247\_at 0.97275 "serine/threonine kinase 24 (STE20 homolog, yeast)" Stk24  
 1426248\_at 1.02049 "serine/threonine kinase 24 (STE20 homolog, yeast)" Stk24  
 1426249\_at 1.02586 "adrenergic receptor kinase, beta 1" Adrbk1  
 1426250\_s\_at 1.09769 RIKEN cDNA 9130404D08 gene 9130404D08Rik  
 1426251\_at 1.01002 carboxypeptidase Z Cpz  
 1426252\_a\_at 0.92840 uromodulin Umod  
 1426253\_at 1.03846 RIKEN cDNA 4933428G09 gene 4933428G09Rik  
 1426254\_at 0.88445 TM2 domain containing 1 Tm2d1  
 1426255\_at 0.96840 "neurofilament, light polypeptide" Nefl  
 1426256\_at 1.15073 translocase of inner mitochondrial membrane 17a Timm17a  
 1426257\_a\_at 1.05364 seryl-aminoacyl-tRNA synthetase Sars  
 1426258\_at 0.66613 "sortilin-related receptor, LDLR class A repeats-containing" Sorl1  
 1426259\_at 1.03513 pantothenate kinase 3 Pank3  
 1426260\_a\_at 0.88308 "UDP glucuronosyltransferase 1 family, polypeptide A2 /// UDP  
 glucuronosyltransferase 1 family, polypeptide A6A /// UDP glycosyltransferase 1 family, polypeptide  
 A10 /// UDP glucuronosyltransferase 1 family, polypeptide A7C /// UDP glucuronosyltransferase 1  
 family, polypeptide A5 /// UDP glucuronosyltransferase 1 family, polypeptide A9 /// UDP  
 glucuronosyltransferase 1 family, polypeptide A6B /// UDP glucuronosyltransferase 1 family,  
 polypeptide A1" Ugt1a2 /// Ugt1a6a /// Ugt1a10 /// Ugt1a7c /// Ugt1a5 /// Ugt1a9 /// Ugt1a6b /// Ugt1a1  
 1426261\_s\_at 0.84020 "UDP glucuronosyltransferase 1 family, polypeptide A2 /// UDP  
 glucuronosyltransferase 1 family, polypeptide A6A /// UDP glycosyltransferase 1 family, polypeptide  
 A10 /// UDP glucuronosyltransferase 1 family, polypeptide A7C /// UDP glucuronosyltransferase 1  
 family, polypeptide A5 /// UDP glucuronosyltransferase 1 family, polypeptide A9 /// UDP  
 glucuronosyltransferase 1 family, polypeptide A6B /// UDP glucuronosyltransferase 1 family,  
 polypeptide A1" Ugt1a2 /// Ugt1a6a /// Ugt1a10 /// Ugt1a7c /// Ugt1a5 /// Ugt1a9 /// Ugt1a6b /// Ugt1a1  
 1426262\_at 0.89352 zinc finger protein 508 Zfp508  
 1426263\_at 0.82574 "immunoglobulin superfamily, member 4C" Igsf4c  
 1426264\_at 0.89223 dihydrolipoamide S-acetyltransferase (E2 component of pyruvate  
 dehydrogenase complex) Dlat  
 1426265\_x\_at 0.90323 dihydrolipoamide S-acetyltransferase (E2 component of pyruvate  
 dehydrogenase complex) Dlat  
 1426266\_s\_at 1.21370 zinc finger and BTB domain containing 8 opposite strand Zbtb8os  
 1426267\_at 0.99131 zinc finger and BTB domain containing 8 opposite strand Zbtb8os  
 1426268\_at 0.87957 RIKEN cDNA C130090K23 gene C130090K23Rik  
 1426269\_at 0.89851 synaptobrevin like 1 Sybl1  
 1426270\_at 1.18656 structural maintenance of chromosomes 5 Smc5  
 1426271\_at 1.14754 structural maintenance of chromosomes 5 Smc5

|              |         |                                                                                         |               |  |
|--------------|---------|-----------------------------------------------------------------------------------------|---------------|--|
| 1426272_at   | 0.98773 | limb region 1                                                                           | Lmbr1         |  |
| 1426273_at   | 0.89026 | limb region 1                                                                           | Lmbr1         |  |
| 1426274_at   | 1.04412 | "solute carrier family 9 (sodium/hydrogen exchanger), member 8"                         | Slc9a8        |  |
| 1426275_a_at | 1.04675 | UDP-glucuronate decarboxylase 1                                                         | Uxs1          |  |
| 1426276_at   | 0.79714 | interferon induced with helicase C domain 1                                             | Ifih1         |  |
| 1426277_at   | 1.02391 | RIKEN cDNA C730025P13 gene                                                              | C730025P13Rik |  |
| 1426278_at   | 1.03642 | "interferon, alpha-inducible protein 27"                                                | Ifi27         |  |
| 1426279_at   | 1.07104 | RIKEN cDNA 5830415L20 gene                                                              | 5830415L20Rik |  |
| 1426280_at   | 0.93945 | expressed sequence AV249152                                                             | AV249152      |  |
| 1426281_at   | 1.12953 | cation channel of sperm 1                                                               | Catsper1      |  |
| 1426282_at   | 1.02347 | neurotrimin                                                                             | Hnt           |  |
| 1426283_at   | 1.04135 | neurotrimin                                                                             | Hnt           |  |
| 1426284_at   | 0.98378 | keratin 20                                                                              | Krt20         |  |
| 1426285_at   | 0.89333 | "laminin, alpha 2"                                                                      | Lama2         |  |
| 1426286_at   | 1.18855 | nucleolar complex associated 3 homolog (S. cerevisiae)                                  | Noc3l         |  |
| 1426287_at   | 1.00385 | ataxin 7                                                                                | Atxn7         |  |
| 1426288_at   | 1.04142 | low density lipoprotein receptor-related protein 4                                      | Lrp4          |  |
| 1426289_at   | 0.94642 | RIKEN cDNA 2610028H07 gene                                                              | 2610028H07Rik |  |
| 1426290_at   | 1.04239 | DIM1 dimethyladenosine transferase 1-like (S. cerevisiae)                               | Dimt1         |  |
| 1426291_at   | 1.03436 | DIM1 dimethyladenosine transferase 1-like (S. cerevisiae)                               | Dimt1         |  |
| 1426292_at   | 0.88777 | RIKEN cDNA 6330581L23 gene                                                              | 6330581L23Rik |  |
| 1426293_at   | 0.82467 | RIKEN cDNA 6330581L23 gene                                                              | 6330581L23Rik |  |
| 1426294_at   | 0.95627 | hyaluronan and proteoglycan link protein 1                                              | Hapln1        |  |
| 1426295_at   | 0.93425 | hyaluronan and proteoglycan link protein 1                                              | Hapln1        |  |
| 1426296_at   | 1.03713 | RAD52 homolog (S. cerevisiae)                                                           | Rad52         |  |
| 1426297_at   | 0.95061 | transcription factor E2a                                                                | Tcfe2a        |  |
| 1426298_at   | 0.91807 | Iroquois related homeobox 2 (Drosophila)                                                | Irx2          |  |
| 1426299_at   | 0.93432 | RIKEN cDNA 9130017C17 gene                                                              | 9130017C17Rik |  |
| 1426300_at   | 0.90433 | activated leukocyte cell adhesion molecule                                              | Alcam         |  |
| 1426301_at   | 0.85033 | activated leukocyte cell adhesion molecule                                              | Alcam         |  |
| 1426302_at   | 0.90566 | "transmembrane protease, serine 4"                                                      | Tmprss4       |  |
| 1426303_at   | 1.10723 | "xylosylprotein beta1,4-galactosyltransferase, polypeptide 7 (galactosyltransferase I)" | B4galt7       |  |
| 1426304_x_at | 1.00154 | "xylosylprotein beta1,4-galactosyltransferase, polypeptide 7 (galactosyltransferase I)" | B4galt7       |  |
| 1426305_at   | 0.87503 | uroplakin 1A                                                                            | Upk1a         |  |
| 1426306_a_at | 0.92986 | "melanoma antigen, family D, 2"                                                         | Maged2        |  |
| 1426307_at   | 1.00278 | cytochrome b5 reductase 4                                                               | Cyb5r4        |  |
| 1426308_at   | 0.98843 | methyl-CpG binding domain protein 3-like 1                                              | Mbd3l1        |  |
| 1426309_at   | 0.89750 | ankyrin repeat and SOCS box-containing protein 9                                        | Asb9          |  |
| 1426310_at   | 0.96594 | "zinc finger, DHHC domain containing 5"                                                 | Zdhhc5        |  |
| 1426311_s_at | 0.94984 | "zinc finger, DHHC domain containing 5"                                                 | Zdhhc5        |  |
| 1426312_at   | 1.02681 | brain and reproductive organ-expressed protein                                          | Bre           |  |

1426313\_at 0.99386 brain and reproductive organ-expressed protein Bre  
1426314\_at 1.10638 endothelin receptor type B Ednrb  
1426315\_a\_at 1.03203 RIKEN cDNA 6330416G13 gene 6330416G13Rik  
1426316\_at 1.05659 RIKEN cDNA 6330416G13 gene 6330416G13Rik  
1426317\_at 0.95486 StAR-related lipid transfer (START) domain containing 6 Stard6  
1426318\_at 1.26169 "serine (or cysteine) peptidase inhibitor, clade B, member 1b" Serpinb1b  
1426319\_at 1.01145 "platelet-derived growth factor, D polypeptide" Pdgfd  
1426320\_at 1.04278 RIKEN cDNA 4933437K13 gene 4933437K13Rik  
1426321\_at 0.95458 T-box 4 Tbx4  
1426322\_a\_at 0.98504 "potassium large conductance calcium-activated channel, subfamily M, beta member 2" Kcnmb2  
1426323\_x\_at 0.99326 Cd27 binding protein (Hindu God of destruction) Siva  
1426324\_at 1.39686 "histocompatibility 2, D region locus 1" H2-D1  
1426325\_at 0.86701 kinesin family member 1C Kif1c  
1426326\_at 0.96108 zinc finger protein 91 Zfp91  
1426327\_s\_at 1.01866 ciliary neurotrophic factor /// zinc finger protein 91 Cntf /// Zfp91  
1426328\_a\_at 0.84737 "sodium channel, voltage-gated, type III, beta" Scn3b  
1426329\_s\_at 0.99011 "brain and acute leukemia, cytoplasmic" Baalc  
1426330\_at 0.85686 "calcium channel, voltage-dependent, gamma subunit 5" Cacng5  
1426331\_a\_at 0.84348 FERM domain containing 4B Frmd4b  
1426332\_a\_at 0.86597 claudin 3 Cldn3  
1426333\_a\_at 0.89972 inhibitor of kappaB kinase beta Ikbkb  
1426334\_a\_at 0.72393 BCL2-like 11 (apoptosis facilitator) Bcl2l11  
1426335\_at 0.90358 "potassium voltage-gated channel, subfamily Q, member 2" Kcnq2  
1426336\_at 0.89897 "calcium channel, voltage-dependent, gamma subunit 7" Cacng7  
1426337\_a\_at 1.09594 TEA domain family member 4 Tead4  
1426338\_a\_at 0.91164 netrin G1 Ntng1  
1426339\_at 0.96254 adenylate kinase 5 Ak5  
1426340\_at 0.96574 "solute carrier family 1 (glial high affinity glutamate transporter), member 3" Slc1a3  
1426341\_at 1.05389 "solute carrier family 1 (glial high affinity glutamate transporter), member 3" Slc1a3  
1426342\_at 1.02403 "STT3, subunit of the oligosaccharyltransferase complex, homolog B (S. cerevisiae)" Stt3b  
1426343\_at 1.01173 "STT3, subunit of the oligosaccharyltransferase complex, homolog B (S. cerevisiae)" Stt3b  
1426344\_at 0.87855 GLE1 RNA export mediator-like (yeast Gle1  
1426345\_at 0.89905 prolyl endopeptidase-like Prepl  
1426346\_at 0.90032 prolyl endopeptidase-like Prepl  
1426347\_at 0.93600 RIKEN cDNA 2010321M09 gene 2010321M09Rik  
1426348\_at 0.87914 "procollagen, type IV, alpha 1" Col4a1  
1426349\_s\_at 0.90720 thymopoietin Tmpo  
1426350\_at 0.99706 mannoside acetylglucosaminyltransferase 2 Mgat2

1426351\_at 1.17220 heat shock protein 1 (chaperonin) Hspd1  
1426352\_s\_at 0.88980 Tial1 cytotoxic granule-associated RNA binding protein-like 1 Tial1  
1426353\_at 1.10176 signal transducer and activator of transcription 6 Stat6  
1426354\_at 0.91824 Brca1 associated protein 1 Bap1  
1426355\_a\_at 0.95842 RIKEN cDNA 6330578E17 gene 6330578E17Rik  
1426356\_at 0.98312 RIKEN cDNA 6330578E17 gene 6330578E17Rik  
1426357\_at 0.94401 TAO kinase 1 Taok1  
1426358\_at 1.02119 TAO kinase 1 Taok1  
1426359\_at 1.04798 zinc finger CCCH type containing 11A Zc3h11a  
1426360\_at 1.01451 zinc finger CCCH type containing 11A Zc3h11a  
1426361\_at 1.00745 zinc finger CCCH type containing 11A Zc3h11a  
1426362\_at 0.90391 transmembrane protein 144 Tmem144  
1426363\_x\_at 1.08141 "H2A histone family, member Y2" H2afy2  
1426364\_at 0.97408 mitochondrial ribosome recycling factor Mrrf  
1426365\_at 1.02420 RIKEN cDNA 2810403A07 gene 2810403A07Rik  
1426366\_at 1.10366 "eukaryotic translation initiation factor 2C, 2" Eif2c2  
1426367\_at 0.95542 calcium binding protein 39-like Cab39l  
1426368\_at 0.76025 Ras and Rab interactor 2 Rin2  
1426369\_at 0.98827 male sterility domain containing 2 Mlstd2  
1426370\_at 0.95353 male sterility domain containing 2 Mlstd2  
1426371\_at 1.00299 male sterility domain containing 2 Mlstd2  
1426372\_a\_at 0.96015 blocked early in transport 1 homolog (*S. cerevisiae*)-like Bet11  
1426373\_at 0.87782 Sloan-Kettering viral oncogene homolog Ski  
1426374\_at 0.98370 RIKEN cDNA 2410166I05 gene 2410166I05Rik  
1426375\_s\_at 0.99399 oxidoreductase NAD-binding domain containing 1 Oxnad1  
1426376\_at 0.90236 receptor accessory protein 5 Reep5  
1426377\_at 1.00921 zinc finger protein 281 Zfp281  
1426378\_at 0.99316 eukaryotic translation initiation factor 4B Eif4b  
1426379\_at 0.96080 eukaryotic translation initiation factor 4B Eif4b  
1426380\_at 0.97078 eukaryotic translation initiation factor 4B Eif4b  
1426381\_at 1.20627 "peroxisome proliferative activated receptor, gamma, coactivator-related 1"  
Pprc1  
1426382\_at 1.01038 "protein phosphatase 1B, magnesium dependent, beta isoform" Ppm1b  
1426383\_at 0.94042 cryptochrome 2 (photolyase-like) Cry2  
1426384\_a\_at 1.10382 "tyrosine 3-monooxygenase/tryptophan 5-monooxygenase activation protein,  
epsilon polypeptide" Ywhae  
1426385\_x\_at 1.06145 "tyrosine 3-monooxygenase/tryptophan 5-monooxygenase activation protein,  
epsilon polypeptide" Ywhae  
1426386\_at 1.13505 ribosomal protein L7-like 1 Rpl7l1  
1426387\_x\_at 0.85210 RIKEN cDNA 4933439C20 gene /// phosphatidylserine decarboxylase  
4933439C20Rik /// Pisd  
1426388\_s\_at 0.95342 receptor-like tyrosine kinase Ryk  
1426389\_at 1.02290 calcium/calmodulin-dependent protein kinase ID Camk1d

1426390\_a\_at 0.97405 ADP-ribosylation factor 1 Arf1  
 1426391\_at 0.99854 ADP-ribosylation factor 1 /// similar to ADP-ribosylation factor 1 Arf1 ///  
 LOC545267  
 1426392\_a\_at 0.93007 ARP3 actin-related protein 3 homolog (yeast) Actr3  
 1426393\_a\_at 0.96126 stromal cell derived factor 4 Sdf4  
 1426394\_at 1.02718 "eukaryotic translation initiation factor 3, subunit 1 alpha" Eif3s1  
 1426395\_s\_at 1.14176 "eukaryotic translation initiation factor 3, subunit 1 alpha" Eif3s1  
 1426396\_at 0.91770 CD247 antigen Cd247  
 1426397\_at 1.03905 "transforming growth factor, beta receptor II" Tgfbr2  
 1426398\_at 0.91735 ubiquitin-conjugating enzyme E2W (putative) Ube2w  
 1426399\_at 0.65137 von Willebrand factor A domain containing 1 Vwa1  
 1426400\_a\_at 1.01778 "calpain, small subunit 1" Capns1  
 1426401\_at 0.95169 "protein phosphatase 3, catalytic subunit, alpha isoform" Ppp3ca  
 1426402\_at 1.06843 "synaptotagmin binding, cytoplasmic RNA interacting protein" Syncrip  
 1426403\_at 1.00513 ARP1 actin-related protein 1 homolog B (yeast) Actr1b  
 1426404\_a\_at 0.86389 ring finger protein 11 Rnf11  
 1426405\_at 0.97257 ring finger protein 11 Rnf11  
 1426406\_at 1.00214 SET domain containing (lysine methyltransferase) 8 Setd8  
 1426407\_at 1.00590 "CUG triplet repeat, RNA binding protein 1" Cugbp1  
 1426408\_at 1.04495 "CUG triplet repeat, RNA binding protein 1" Cugbp1  
 1426409\_at 0.87085 "leucine zipper, putative tumor suppressor 2" Lzts2  
 1426410\_at 1.10840 "pyruvate dehydrogenase kinase, isoenzyme 3" Pdk3  
 1426411\_a\_at 0.89926 spermatid perinuclear RNA binding protein /// RIKEN cDNA C230082I21  
 gene Strbp /// C230082I21Rik  
 1426412\_at 1.10085 neurogenic differentiation 1 Neurod1  
 1426413\_at 1.05982 neurogenic differentiation 1 Neurod1  
 1426414\_a\_at 1.08569 ring finger protein 7 Rnf7  
 1426415\_a\_at 1.16339 tripartite motif protein 25 Trim25  
 1426416\_a\_at 0.86822 "Yip1 domain family, member 4" Yipf4  
 1426417\_at 1.23885 "Yip1 domain family, member 4" Yipf4  
 1426418\_at 0.70982 atonal homolog 8 (Drosophila) Atoh8  
 1426419\_at 1.03275 RNA binding motif protein 26 Rbm26  
 1426420\_at 0.94294 RNA binding motif protein 26 Rbm26  
 1426421\_s\_at 1.01550 RNA binding motif protein 26 Rbm26  
 1426422\_at 0.96786 coiled-coil and C2 domain containing 1A Cc2d1a  
 1426423\_at 1.07704 serine hydroxymethyl transferase 2 (mitochondrial) Shmt2  
 1426424\_at 0.95837 "SGT1, suppressor of G2 allele of SKP1 (S. cerevisiae)" Sugt1  
 1426425\_at 1.12311 "SGT1, suppressor of G2 allele of SKP1 (S. cerevisiae)" Sugt1  
 1426426\_at 1.03651 RNA binding motif protein 13 Rbm13  
 1426427\_at 0.99190 tubulin tyrosine ligase-like 1 Ttl1  
 1426428\_at 1.00088 THAP domain containing 7 Thap7  
 1426429\_at 0.89270 THAP domain containing 7 Thap7  
 1426430\_at 0.94507 jagged 2 Jag2



|              |                                                                                               |               |  |
|--------------|-----------------------------------------------------------------------------------------------|---------------|--|
| 1426431_at   | 0.93249 jagged 2                                                                              | Jag2          |  |
| 1426432_a_at | 0.99595 "solute carrier family 4 (anion exchanger), member 4"                                 | Slc4a4        |  |
| 1426433_at   | 1.03110 myc target 1                                                                          | Myct1         |  |
| 1426434_at   | 0.92333 transmembrane protein 43                                                              | Tmem43        |  |
| 1426435_at   | 0.86406 transmembrane protein 135                                                             | Tmem135       |  |
| 1426436_at   | 0.93973 transmembrane protein 159                                                             | Tmem159       |  |
| 1426437_s_at | 0.99593 histone deacetylase 3                                                                 | Hdac3         |  |
| 1426438_at   | 0.97569 "DEAD (Asp-Glu-Ala-Asp) box polypeptide 3, Y-linked"                                  | Ddx3y         |  |
| 1426439_at   | 1.09898 "DEAD (Asp-Glu-Ala-Asp) box polypeptide 3, Y-linked"                                  | Ddx3y         |  |
| 1426440_at   | 0.90476 dehydrogenase/reductase (SDR family) member 7                                         | Dhrs7         |  |
| 1426441_at   | 1.50484 "solute carrier family 11 (proton-coupled divalent metal ion transporters), member 2" | Slc11a2       |  |
| 1426442_at   | 1.00989 glycoprotein m6a                                                                      | Gpm6a         |  |
| 1426443_at   | 0.86815 rhomboid domain containing 2                                                          | Rhbdd2        |  |
| 1426444_at   | 0.98106 rhomboid domain containing 2                                                          | Rhbdd2        |  |
| 1426445_at   | 0.97165 meningioma expressed antigen 6 (coiled-coil proline-rich)                             | Mgea6         |  |
| 1426446_at   | 1.12723 RIKEN cDNA 6430548M08 gene                                                            | 6430548M08Rik |  |
| 1426447_at   | 1.09914 nucleoporin 35                                                                        | Nup35         |  |
| 1426448_at   | 0.86252 "praja1, RING-H2 motif containing"                                                    | Pja1          |  |
| 1426449_a_at | 0.87427 "praja1, RING-H2 motif containing"                                                    | Pja1          |  |
| 1426450_at   | 0.91889 phospholipase C-like 2                                                                | Plcl2         |  |
| 1426451_at   | 0.94038 RIKEN cDNA 6030465E24 gene                                                            | 6030465E24Rik |  |
| 1426452_a_at | 1.08867 "RAB30, member RAS oncogene family"                                                   | Rab30         |  |
| 1426453_at   | 0.96893 pitrilysin metalloproteinase 1                                                        | Pitrm1        |  |
| 1426454_at   | 1.82764 "Rho, GDP dissociation inhibitor (GDI) beta"                                          | Arhgdib       |  |
| 1426455_at   | 1.07429 serologically defined colon cancer antigen 10                                         | Sdccag10      |  |
| 1426456_a_at | 0.95546 protein inhibitor of activated STAT 2                                                 | Pias2         |  |
| 1426457_at   | 1.19193 sarcolemma associated protein                                                         | Slmap         |  |
| 1426458_at   | 1.10886 sarcolemma associated protein                                                         | Slmap         |  |
| 1426459_s_at | 0.90296 expressed sequence AW549877                                                           | AW549877      |  |
| 1426460_a_at | 1.00091 UDP-glucose pyrophosphorylase 2                                                       | Ugp2          |  |
| 1426461_at   | 0.93342 UDP-glucose pyrophosphorylase 2                                                       | Ugp2          |  |
| 1426462_at   | 1.18767 gephyrin                                                                              | Gphn          |  |
| 1426463_at   | 1.11541 gephyrin                                                                              | Gphn          |  |
| 1426464_at   | 0.81429 "nuclear receptor subfamily 1, group D, member 1"                                     | Nr1d1         |  |
| 1426465_at   | 1.01509 "discs, large homolog-associated protein 4 (Drosophila)"                              | Dlgap4        |  |
| 1426466_s_at | 0.91917 ribosomal protein S6 kinase-like 1                                                    | Rps6kl1       |  |
| 1426467_s_at | 1.00536 RIKEN cDNA 0610037L13 gene                                                            | 0610037L13Rik |  |
| 1426468_at   | 0.98530 RIKEN cDNA 0610037L13 gene                                                            | 0610037L13Rik |  |
| 1426469_a_at | 0.94170 TATA box binding protein                                                              | Tbp           |  |
| 1426470_at   | 1.00144 --- ---                                                                               |               |  |
| 1426471_at   | 0.96132 zinc finger protein 52                                                                | Zfp52         |  |
| 1426472_at   | 1.10417 zinc finger protein 52                                                                | Zfp52         |  |

1426473\_at 0.90497 "DnaJ (Hsp40) homolog, subfamily C, member 9" Dnajc9  
1426474\_at 1.05834 ATP synthase mitochondrial F1 complex assembly factor 2 Atpaf2  
1426475\_at 1.07901 hydroxymethylbilane synthase Hmbs  
1426476\_at 0.89968 RAS p21 protein activator 1 Rasa1  
1426477\_at 1.00512 RAS p21 protein activator 1 Rasa1  
1426478\_at 0.73405 RAS p21 protein activator 1 Rasa1  
1426479\_a\_at 0.88715 trinucleotide repeat containing 5 Tnrc5  
1426480\_at 0.96817 Shwachman-Bodian-Diamond syndrome homolog (human) Sbds  
1426481\_at 0.94608 kelch-like 22 (Drosophila) Klhl22  
1426482\_at 1.13424 "protein-kinase, interferon-inducible double stranded RNA dependent inhibitor, repressor of (P58 repressor)" Prkrir  
1426483\_at 1.01249 "protein-kinase, interferon-inducible double stranded RNA dependent inhibitor, repressor of (P58 repressor)" Prkrir  
1426484\_at 0.95296 UBX domain containing 2 Ubxd2  
1426485\_at 0.99625 UBX domain containing 2 Ubxd2  
1426486\_at 0.98220 UBX domain containing 2 Ubxd2  
1426487\_a\_at 1.14781 retinoblastoma binding protein 6 Rbbp6  
1426488\_at 0.96902 bifunctional apoptosis regulator Bfar  
1426489\_s\_at 0.96075 bifunctional apoptosis regulator Bfar  
1426490\_at 0.91189 bifunctional apoptosis regulator Bfar  
1426491\_at 0.97567 hect (homologous to the E6-AP (UBE3A) carboxyl terminus) domain and RCC1 (CHC1)-like domain (RLD) 2 Herc2  
1426492\_at 1.01542 tyrosyl-DNA phosphodiesterase 1 Tdp1  
1426493\_a\_at 0.90782 kinesin family member C2 Kifc2  
1426494\_at 0.92030 RNA (guanine-9-) methyltransferase domain containing 3 Rg9mtd3  
1426495\_at 1.06795 RIKEN cDNA 2410042D21 gene 2410042D21Rik  
1426496\_at 1.09747 WD repeat domain 55 Wdr55  
1426497\_at 0.95827 "jumonji, AT rich interactive domain 1C (Rbp2 like)" Jarid1c  
1426498\_at 1.19943 "jumonji, AT rich interactive domain 1C (Rbp2 like)" Jarid1c  
1426499\_at 1.01739 SH3-domain GRB2-like endophilin B2 Sh3glb2  
1426500\_at 1.01154 isoprenylcysteine carboxyl methyltransferase Icmt  
1426501\_a\_at 1.04995 Traf2 binding protein T2bp  
1426502\_s\_at 1.12336 "glutamic pyruvic transaminase 1, soluble" Gpt1  
1426503\_a\_at 1.01752 ring finger protein 121 Rnf121  
1426504\_a\_at 0.95684 ring finger protein 121 Rnf121  
1426505\_at 0.96229 ecotropic viral integration site 2b Evi2b  
1426506\_at 0.95682 ecotropic viral integration site 2a /// ecotropic viral integration site 2b Evi2a /// Evi2b  
1426507\_at 0.99563 "interleukin 1 family, member 5 (delta)" Il1f5  
1426508\_at 0.94840 glial fibrillary acidic protein Gfap  
1426509\_s\_at 1.12608 glial fibrillary acidic protein Gfap  
1426510\_at 1.01899 saccharopine dehydrogenase (putative) Sccpdh  
1426511\_at 0.94337 sushi domain containing 2 Susd2

1426512\_at 0.98794 olfactomedin 3 Olfm3  
1426513\_at 1.15909 RNA binding motif protein 28 Rbm28  
1426514\_at 0.91548 RIKEN cDNA 4631426J05 gene 4631426J05Rik  
1426515\_a\_at 0.99098 "torsin family 1, member A (torsin A)" Tor1a  
1426516\_a\_at 1.32974 lipin 1 Lpin1  
1426517\_at 0.98672 "guanine nucleotide binding protein, alpha z subunit" Gnaz  
1426518\_at 0.89535 "tubulin, gamma complex associated protein 5" Tubgcp5  
1426519\_at 0.81754 "procollagen-proline, 2-oxoglutarate 4-dioxygenase (proline 4-hydroxylase), alpha 1 polypeptide" P4ha1  
1426520\_at 0.96762 B-cell translocation gene 4 Btg4  
1426521\_at 0.91907 RIKEN cDNA D230025D16 gene D230025D16Rik  
1426522\_at 0.86813 "hydroxyacyl-Coenzyme A dehydrogenase/3-ketoacyl-Coenzyme A thiolase/enoyl-Coenzyme A hydratase (trifunctional protein), beta subunit /// similar to hydroxyacyl-Coenzyme A dehydrogenase/3-ketoacyl-Coenzyme A thiolase/enoyl-Coenzyme A hydratase (trifunctional protein), beta subunit" Hadhb /// LOC623031  
1426523\_a\_at 1.01083 glucosamine-6-phosphate deaminase 2 Gnpda2  
1426524\_at 1.08149 glucosamine-6-phosphate deaminase 2 Gnpda2  
1426525\_at 0.93345 AT rich interactive domain 2 (Arid-rfx like) Arid2  
1426526\_s\_at 1.05289 oviductal glycoprotein 1 Ovgp1  
1426527\_at 1.00521 "target of EGR1, member 1 (nuclear)" Toe1  
1426528\_at 1.30951 neuropilin 2 Nrp2  
1426529\_a\_at 1.00700 transgelin 2 Tagln2  
1426530\_a\_at 0.86815 kelch-like 5 (Drosophila) Klh15  
1426531\_at 0.90843 "zinc finger, MYND domain containing 11" Zmynd11  
1426532\_at 0.95300 "zinc finger, MYND domain containing 11" Zmynd11  
1426533\_at 1.13851 nucleolar protein 5A Nol5a  
1426534\_a\_at 0.97725 ADP-ribosylation factor GTPase activating protein 3 Arfgap3  
1426535\_at 0.97208 RIKEN cDNA 9630046K23 gene 9630046K23Rik  
1426536\_at 0.96248 NMDA receptor-regulated gene 2 Narg2  
1426537\_at 1.04967 NMDA receptor-regulated gene 2 Narg2  
1426538\_a\_at 1.02281 transformation related protein 53 Trp53  
1426539\_at 0.89298 ubiquitin specific peptidase 11 Usp11  
1426540\_at 1.01269 endonuclease domain containing 1 Endod1  
1426541\_a\_at 0.97816 endonuclease domain containing 1 Endod1  
1426542\_at 0.94670 endonuclease domain containing 1 Endod1  
1426543\_x\_at 1.05646 endonuclease domain containing 1 Endod1  
1426544\_a\_at 1.02777 tetratricopeptide repeat domain 14 Ttc14  
1426545\_at 0.93383 trinucleotide repeat containing 6b Tnrc6b  
1426546\_at 1.16304 testis-specific kinase 2 Tesk2  
1426547\_at 0.75594 group specific component Gc  
1426548\_a\_at 0.92071 ATP binding domain 4 Atpbd4  
1426549\_at 1.04335 RIKEN cDNA 2410018C20 gene 2410018C20Rik  
1426550\_at 0.97910 "SID1 transmembrane family, member 1" Sidt1

1426551\_at 0.93324 "SID1 transmembrane family, member 1" Sidt1  
 1426552\_a\_at 0.98892 B-cell CLL/lymphoma 11A (zinc finger protein) Bcl11a  
 1426553\_at 0.91852 "DnaJ (Hsp40) homolog, subfamily C, member 14" Dnajc14  
 1426554\_a\_at 1.10608 phosphoglycerate mutase 1 /// similar to Phosphoglycerate mutase 1 (Phosphoglycerate mutase isozyme B) (PGAM-B) (BPG-dependent PGAM 1) /// similar to Phosphoglycerate mutase 1 (Phosphoglycerate mutase isozyme B) (PGAM-B) (BPG-dependent PGAM 1) /// similar to Phosphoglycerate mutase 1 (Phosphoglycerate mutase isozyme B) (PGAM-B) (BPG-dependent PGAM 1) /// similar to Phosphoglycerate mutase 1 (Phosphoglycerate mutase isozyme B) (PGAM-B) (BPG-dependent PGAM 1) Pgam1 /// LOC668045 /// LOC672147 /// LOC675179 /// LOC677000  
 1426555\_at 0.95641 serine carboxypeptidase 1 Scpep1  
 1426556\_at 0.98365 suppressor of hairy wing homolog 4 (Drosophila) Suhw4  
 1426557\_at 0.97818 mesoderm posterior 1 Mesp1  
 1426558\_x\_at 0.91125 RIKEN cDNA 3100002L24 gene /// similar to zinc finger protein 14 /// RIKEN cDNA 0610010B08 gene /// similar to zinc finger protein 91 /// similar to zinc finger protein 709 /// similar to gonadotropin inducible ovarian transcription factor 1 /// similar to zinc finger protein 97 /// similar to gonadotropin inducible ovarian transcription factor 1 3100002L24Rik /// LOC627901 /// 0610010B08Rik /// LOC628084 /// LOC628147 /// LOC668030 /// LOC668039 /// LOC668066  
 1426559\_at 1.11630 "sno, strawberry notch homolog 1 (Drosophila)" Sbno1  
 1426560\_a\_at 0.76723 nephronectin Npnt  
 1426561\_a\_at 0.76668 nephronectin Npnt  
 1426562\_a\_at 0.92125 olfactomedin 1 Olm1  
 1426563\_at 0.86768 zinc finger protein 553 Zfp553  
 1426564\_at 1.08640 zinc finger protein 553 Zfp553  
 1426565\_at 1.00922 insulin-like growth factor I receptor Igflr  
 1426566\_s\_at 0.78928 interleukin 17 receptor E Il17re  
 1426567\_a\_at 0.90388 PQ loop repeat containing 1 Pqlc1  
 1426568\_at 1.10421 "solute carrier family 2 (facilitated glucose transporter), member 9" Slc2a9  
 1426569\_a\_at 1.24620 fyn-related kinase Frk  
 1426570\_a\_at 1.02677 fyn-related kinase Frk  
 1426571\_at 0.74502 transmembrane protein 16A Tmem16a  
 1426572\_at 1.19200 "malic enzyme 2, NAD(+)-dependent, mitochondrial" Me2  
 1426573\_at 1.00778 "malic enzyme 2, NAD(+)-dependent, mitochondrial" Me2  
 1426574\_a\_at 0.88418 adducin 3 (gamma) Add3  
 1426575\_at 0.96738 transmembrane protein 23 Tmem23  
 1426576\_at 0.99890 transmembrane protein 23 Tmem23  
 1426577\_a\_at 1.03666 RIKEN cDNA 1810054G18 gene 1810054G18Rik  
 1426578\_s\_at 0.96860 SNAP-associated protein Snapap  
 1426579\_at 0.98255 guanine nucleotide binding protein-like 2 (nucleolar) Gnl2  
 1426580\_at 1.01080 polo-like kinase 4 (Drosophila) Plk4  
 1426581\_at 1.02428 "protein tyrosine phosphatase, mitochondrial 1" Ptpmt1  
 1426582\_at 1.14295 activating transcription factor 2 Atf2  
 1426583\_at 1.05259 activating transcription factor 2 Atf2

1426584\_a\_at 0.80633 sorbitol dehydrogenase Sord  
1426585\_s\_at 1.06394 mitogen activated protein kinase 1 Mapk1  
1426586\_at 0.92733 "solute carrier family 25 (mitochondrial carrier oxoglutarate carrier), member 11" Slc25a11  
1426587\_a\_at 1.02680 signal transducer and activator of transcription 3 Stat3  
1426588\_at 0.95712 tetraspanin 10 Tspan10  
1426589\_at 1.07291 growth factor receptor bound protein 2-associated protein 3 Gab3  
1426590\_at 0.90490 "G elongation factor, mitochondrial 2" Gfm2  
1426591\_at 1.05488 "G elongation factor, mitochondrial 2" Gfm2  
1426592\_a\_at 1.04754 F-box only protein 22 Fbxo22  
1426593\_a\_at 1.03584 F-box only protein 22 Fbxo22  
1426594\_at 0.85890 FERM domain containing 4B Frmd4b  
1426595\_at 1.02097 "solute carrier family 18 (vesicular monoamine), member 1" Slc18a1  
1426596\_a\_at 1.16162 survival motor neuron 1 Smn1  
1426597\_s\_at 1.08809 expressed sequence C79267 C79267  
1426598\_at 1.08088 "ubiquitously transcribed tetratricopeptide repeat gene, Y chromosome" Uty  
1426599\_a\_at 1.40866 "solute carrier family 2 (facilitated glucose transporter), member 1" Slc2a1  
1426600\_at 1.25073 "solute carrier family 2 (facilitated glucose transporter), member 1" Slc2a1  
1426601\_at 0.94922 "solute carrier family 37 (glycerol-3-phosphate transporter), member 1" Slc37a1  
1426602\_at 1.04647 v-raf murine sarcoma 3611 viral oncogene homolog Araf  
1426603\_at 0.87759 "ribonuclease L (2', 5'-oligoadenylate synthetase-dependent)" Rnasel  
1426604\_at 0.86229 "ribonuclease L (2', 5'-oligoadenylate synthetase-dependent)" Rnasel  
1426605\_at 0.81559 "BRCA1/BRCA2-containing complex, subunit 3" Brcc3  
1426606\_at 0.97483 cartilage acidic protein 1 Crtac1  
1426607\_at 0.77850 similar to CG10866-PA LOC633640  
1426608\_at 1.02836 similar to CG10866-PA LOC633640  
1426609\_at 1.12161 RIKEN cDNA 2810028N01 gene 2810028N01Rik  
1426610\_a\_at 0.99068 transcription termination factor 1 Ttf1  
1426611\_at 1.05097 "proteasome (prosome, macropain) 26S subunit, ATPase 2" Psmc2  
1426612\_at 1.02128 timeless interacting protein Tipin  
1426613\_a\_at 1.04456 U2 small nuclear ribonucleoprotein B Snrpb2  
1426614\_at 0.93714 protein kinase C binding protein 1 Prkcbp1  
1426615\_s\_at 0.74869 N-myc downstream regulated gene 4 Ndr4  
1426616\_at 1.00512 TLC domain containing 1 Tlcd1  
1426617\_a\_at 1.09196 tweety homolog 1 (Drosophila) Ttyh1  
1426618\_a\_at 0.91268 "protein O-linked mannose beta1,2-N-acetylglucosaminyltransferase"  
Pomgnt1  
1426619\_at 0.87971 "gene model 1313, (NCBI)" Gm1313  
1426620\_at 0.91179 carbohydrate sulfotransferase 10 Chst10  
1426621\_a\_at 0.73016 "protein phosphatase 2 (formerly 2A), regulatory subunit B (PR 52), beta isoform" Ppp2r2b  
1426622\_a\_at 0.95705 glutaminyl-peptide cyclotransferase (glutaminyl cyclase) /// similar to  
Glutaminyl-peptide cyclotransferase precursor (QC) (Glutaminyl-tRNA cyclotransferase) (Glutaminyl

cyclase) Qpct /// LOC639942  
1426623\_a\_at 0.88411 Rho GTPase activating protein 17 Arhgap17  
1426624\_a\_at 0.68708 yippee-like 3 (Drosophila) Ypel3  
1426625\_at 0.97410 zinc finger protein 623 Zfp623  
1426626\_at 1.18511 "general transcription factor IIF, polypeptide 2" Gtf2f2  
1426627\_at 0.99794 mitogen activated protein kinase kinase kinase 7 Map3k7  
1426628\_at 0.87677 transmembrane protein 34 Tmem34  
1426629\_at 1.04212 DEAH (Asp-Glu-Ala-His) box polypeptide 8 Dhx8  
1426630\_at 1.12333 exosome component 2 Exosc2  
1426631\_at 1.07599 pseudouridylate synthase 7 homolog (S. cerevisiae) Pus7  
1426632\_at 0.97797 potassium channel tetramerisation domain containing 14 Kctd14  
1426633\_s\_at 0.88974 potassium channel tetramerisation domain containing 14 Kctd14  
1426634\_at 1.01762 "solute carrier family 5 (sodium/glucose cotransporter), member 9" Slc5a9  
1426635\_at 0.99001 acyl-Coenzyme A binding domain containing 3 Acbd3  
1426636\_a\_at 0.96600 baculoviral IAP repeat-containing 4 Birc4  
1426637\_a\_at 0.92495 sine oculis-related homeobox 3 homolog (Drosophila) Six3  
1426638\_at 1.10780 sine oculis-related homeobox 3 homolog (Drosophila) Six3  
1426639\_a\_at 0.91436 "transcription factor 7-like 2, T-cell specific, HMG-box" Tcf712  
1426640\_s\_at 0.87507 tribbles homolog 2 (Drosophila) Trib2  
1426641\_at 1.07334 tribbles homolog 2 (Drosophila) Trib2  
1426642\_at 0.75945 fibronectin 1 Fn1  
1426643\_at 0.98626 elongation protein 3 homolog (S. cerevisiae) Elp3  
1426644\_at 1.10018 "TBC1 domain family, member 20" Tbc1d20  
1426645\_at 1.05798 "heat shock protein 90kDa alpha (cytosolic), class A member 1" Hsp90aa1  
1426646\_at 0.88903 RIKEN cDNA 9130011J15 gene 9130011J15Rik  
1426647\_at 0.88296 RIKEN cDNA 9130011J15 gene 9130011J15Rik  
1426648\_at 1.00439 MAP kinase-activated protein kinase 2 Mapkapk2  
1426649\_at 0.83755 transmembrane protein with EGF-like and two follistatin-like domains 1 Tmeff1  
1426650\_at 1.01568 "myosin, heavy polypeptide 8, skeletal muscle, perinatal" Myh8  
1426651\_at 1.15870 mitochondrial ribosomal protein L44 Mrpl44  
1426652\_at 1.05920 minichromosome maintenance deficient 3 (S. cerevisiae) /// similar to DNA replication licensing factor MCM3 (DNA polymerase alpha holoenzyme-associated protein P1) (P1-MCM3) Mcm3 /// LOC671904  
1426653\_at 1.04203 minichromosome maintenance deficient 3 (S. cerevisiae) Mcm3  
1426654\_at 1.02115 "zinc finger, C3HC type 1" Zc3hc1  
1426655\_a\_at 1.04298 RIKEN cDNA 4930504E06 gene 4930504E06Rik  
1426656\_at 0.91177 RIKEN cDNA 4930504E06 gene 4930504E06Rik  
1426657\_s\_at 1.12307 3-phosphoglycerate dehydrogenase /// similar to 3-phosphoglycerate dehydrogenase Phgdh /// LOC666422 /// LOC666875 /// LOC669985 /// LOC671102 /// LOC673015 /// LOC675010  
1426658\_x\_at 1.07357 3-phosphoglycerate dehydrogenase /// similar to 3-phosphoglycerate

dehydrogenase Phgdh /// LOC673015  
 1426659\_a\_at 1.00978 ribosomal protein L23a Rpl23a  
 1426660\_x\_at 1.00598 ribosomal protein L23a Rpl23a  
 1426661\_at 1.03080 ribosomal protein L27a /// similar to ribosomal protein L27a Rpl27a ///  
 LOC665189  
 1426662\_at 0.91510 cytidine monophospho-N-acetylneuraminic acid synthetase Cmas  
 1426663\_s\_at 1.09059 "solute carrier family 45, member 3" Slc45a3  
 1426664\_x\_at 1.04734 "solute carrier family 45, member 3" Slc45a3  
 1426665\_at 1.02474 katanin p80 (WD40-containing) subunit B 1 Katnb1  
 1426666\_a\_at 0.93520 unc-84 homolog A (C. elegans) Unc84a  
 1426667\_a\_at 0.91596 unc-84 homolog A (C. elegans) Unc84a  
 1426668\_at 0.90413 "solute carrier family 30 (zinc transporter), member 9" Slc30a9  
 1426669\_at 0.83997 RIKEN cDNA C530044N13 gene C530044N13Rik  
 1426670\_at 0.92439 agrin Agrin  
 1426671\_a\_at 0.88587 RNA binding motif protein 39 Rbm39  
 1426672\_at 0.91972 transmembrane protein 16K Tmem16k  
 1426673\_at 0.98069 cadherin 3 Cdh3  
 1426674\_at 1.02509 "eukaryotic translation initiation factor 3, subunit 9 (eta)" Eif3s9  
 1426675\_at 1.02472 translocase of outer mitochondrial membrane 70 homolog A (yeast)  
 Tomm70a  
 1426676\_s\_at 1.02275 translocase of outer mitochondrial membrane 70 homolog A (yeast)  
 Tomm70a  
 1426677\_at 0.95786 "filamin, alpha" Flna  
 1426678\_at 0.94932 zinc finger protein 706 Zfp706  
 1426679\_at 0.98402 zinc finger protein 706 Zfp706  
 1426680\_at 0.77143 "selenoprotein N, 1" Sepn1  
 1426681\_at 0.91939 zinc finger CCCH type containing 5 Zc3h5  
 1426682\_at 0.86524 "CCR4-NOT transcription complex, subunit 6" Cnot6  
 1426683\_at 0.98549 "CCR4-NOT transcription complex, subunit 6" Cnot6  
 1426684\_at 0.91602 "CCR4-NOT transcription complex, subunit 6" Cnot6  
 1426685\_a\_at 0.98667 "CCR4-NOT transcription complex, subunit 6" Cnot6  
 1426686\_s\_at 0.93685 mitogen activated protein kinase kinase kinase 3 Map3k3  
 1426687\_at 1.03293 mitogen activated protein kinase kinase kinase 3 Map3k3  
 1426688\_at 0.95454 "succinate dehydrogenase complex, subunit A, flavoprotein (Fp)" Sdha  
 1426689\_s\_at 0.94856 "succinate dehydrogenase complex, subunit A, flavoprotein (Fp)" Sdha  
 1426690\_a\_at 0.90132 sterol regulatory element binding factor 1 Srebf1  
 1426691\_at 1.05738 tight junction associated protein 1 Tjap1  
 1426692\_at 1.00743 coiled-coil domain containing 97 Ccdc97  
 1426693\_x\_at 0.99147 "COX15 homolog, cytochrome c oxidase assembly protein (yeast)" Cox15  
 1426694\_at 0.96553 RIKEN cDNA 9030624J02 gene 9030624J02Rik  
 1426695\_at 1.06070 RIKEN cDNA 9030624J02 gene 9030624J02Rik  
 1426696\_at 0.78810 low density lipoprotein receptor-related protein associated protein 1 Lrpap1  
 1426697\_a\_at 0.75301 low density lipoprotein receptor-related protein associated protein 1 Lrpap1

1426698\_a\_at 1.07643 heterogeneous nuclear ribonucleoprotein M Hnrpm  
1426699\_at 0.91357 expressed sequence AU040320 AU040320  
1426700\_a\_at 1.05837 ubiquitin specific peptidase 52 Usp52  
1426701\_at 0.89717 RIKEN cDNA 4632419K20 gene 4632419K20Rik  
1426702\_at 0.89348 RIKEN cDNA 4632419K20 gene 4632419K20Rik  
1426703\_at 1.04815 cyclin G associated kinase Gak  
1426704\_at 0.88196 cyclin G associated kinase Gak  
1426705\_s\_at 1.20688 isoleucine-tRNA synthetase Iars  
1426706\_s\_at 1.07715 xylulokinase homolog (H. influenzae) Xylb  
1426707\_at 0.87843 "tubulin, gamma complex associated protein 3" Tubgcp3  
1426708\_at 0.90330 anthrax toxin receptor 2 Antxr2  
1426709\_a\_at 0.98522 ubiquitin specific peptidase 33 Usp33  
1426710\_at 0.99069 calmodulin 3 Calm3  
1426711\_at 0.75189 transmembrane and coiled-coil domains 3 Tmco3  
1426712\_at 1.02046 "solute carrier family 6 (neurotransmitter transporter), member 15" Slc6a15  
1426713\_s\_at 1.12103 glutamyl-prolyl-tRNA synthetase /// similar to Bifunctional aminoacyl-tRNA  
synthetase Eprs /// LOC633677  
1426714\_at 1.04648 "DNA segment, Chr 11, ERATO Doi 18, expressed" D11Ert18e  
1426715\_s\_at 1.09137 "DNA segment, Chr 11, ERATO Doi 18, expressed" D11Ert18e  
1426716\_at 1.11205 tudor domain containing 7 Tdrd7  
1426717\_at 0.99457 non imprinted in Prader-Willi/Angelman syndrome 2 homolog (human)  
Nipa2  
1426718\_at 1.11174 superkiller viralicidic activity 2-like 2 (S. cerevisiae) Skiv2l2  
1426719\_at 0.94600 "amyloid beta (A4) precursor protein-binding, family B, member 2" Apbb2  
1426720\_at 0.81488 "amyloid beta (A4) precursor protein-binding, family B, member 2" Apbb2  
1426721\_s\_at 1.13862 TCDD-inducible poly(ADP-ribose) polymerase Tiparp  
1426722\_at 0.86304 "solute carrier family 38, member 2" Slc38a2  
1426723\_at 0.96961 WD repeat domain 48 Wdr48  
1426724\_at 0.90931 "calponin 3, acidic" Cnn3  
1426725\_s\_at 1.01116 "E26 avian leukemia oncogene 1, 5' domain" Ets1  
1426726\_at 1.00201 "protein phosphatase 1, regulatory subunit 10" Ppp1r10  
1426727\_s\_at 1.00725 "protein phosphatase 1, regulatory subunit 10" Ppp1r10  
1426728\_x\_at 0.94301 phosphatidylserine synthase 2 Ptdss2  
1426729\_at 0.97105 RIKEN cDNA 2900046G09 gene 2900046G09Rik  
1426730\_a\_at 0.98891 prolactin-like protein K Prlplk  
1426731\_at 0.83521 desmin Des  
1426732\_at 1.04705 desmin Des  
1426733\_at 1.03611 "inositol 1,3,4-triphosphate 5/6 kinase" Itpk1  
1426734\_at 0.92887 cDNA sequence BC022623 BC022623  
1426735\_at 1.00149 "isoleucine-tRNA synthetase 2, mitochondrial" Iars2  
1426736\_at 0.98070 G1 to S phase transition 1 Gspt1  
1426737\_at 1.12141 G1 to S phase transition 1 Gspt1  
1426738\_at 0.87049 diacylglycerol kinase zeta Dgkz



1426739\_at 0.96770 downstream neighbor of SON Donson  
1426740\_s\_at 1.07190 armadillo repeat containing 5 Armc5  
1426741\_a\_at 0.92520 FAST kinase domains 2 Fastkd2  
1426742\_at 0.95200 "ATP synthase, H+ transporting, mitochondrial F0 complex, subunit b, isoform 1" Atp5f1  
1426743\_at 0.89537 Dip3 beta Dip3b  
1426744\_at 1.17206 sterol regulatory element binding factor 2 Srebf2  
1426745\_at 0.96748 "DNA segment, Chr 11, Brigham & Women's Genetics 0434 expressed" D11Bwg0434e  
1426746\_at 0.91399 RIKEN cDNA 1810026J23 gene 1810026J23Rik  
1426747\_at 1.08845 "ATP-binding cassette, sub-family F (GCN20), member 3" Abcf3  
1426748\_s\_at 0.82382 "ATP-binding cassette, sub-family F (GCN20), member 3" Abcf3  
1426749\_at 1.09922 protein arginine N-methyltransferase 3 Prmt3  
1426750\_at 1.12219 "filamin, beta" Flnb  
1426751\_s\_at 1.05725 nucleoporin 107 Nup107  
1426752\_at 0.83286 PHD finger protein 17 Phf17  
1426753\_at 0.94202 PHD finger protein 17 Phf17  
1426754\_x\_at 0.89295 cytoskeleton-associated protein 4 Ckap4  
1426755\_at 0.83080 cytoskeleton-associated protein 4 Ckap4  
1426756\_at 0.75695 UDP-N-acetyl-alpha-D-galactosamine:polypeptide N-acetylgalactosaminyltransferase 2 Galnt2  
1426757\_at 1.04094 adenosine monophosphate deaminase 2 (isoform L) Ampd2  
1426758\_s\_at 1.05696 "GTL2, imprinted maternally expressed untranslated mRNA" Gtl2  
1426759\_at 0.86046 mitogen-activated protein kinase kinase kinase 3 /// similar to mitogen-activated protein kinase kinase kinase 3 Map4k3 /// LOC675560  
1426760\_at 0.95880 importin 8 Ipo8  
1426761\_at 0.96232 amine oxidase (flavin containing) domain 2 Aof2  
1426762\_s\_at 0.91048 amine oxidase (flavin containing) domain 2 Aof2  
1426763\_at 0.88323 ornithine decarboxylase antizyme 2 Oaz2  
1426764\_at 0.93192 ornithine decarboxylase antizyme 2 Oaz2  
1426765\_at 1.08880 COMM domain containing 7 /// similar to COMM domain containing protein 7 /// similar to COMM domain-containing protein 7 Commd7 /// LOC631742 /// LOC674161  
1426766\_at 1.06405 RIKEN cDNA 6330403K07 gene 6330403K07Rik  
1426767\_at 0.93594 RIKEN cDNA 3230401M21 gene 3230401M21Rik  
1426768\_at 0.94872 RIKEN cDNA 1700060H10 gene 1700060H10Rik  
1426769\_s\_at 0.93624 mastermind like 1 (Drosophila) Maml1  
1426770\_at 0.89898 peroxisome biogenesis factor 5 Pex5  
1426771\_at 0.88459 taurine upregulated gene 1 Tug1  
1426772\_x\_at 0.97245 "T-cell receptor beta, joining region /// T-cell receptor beta, variable 13 /// similar to T-cell receptor beta-1 chain C region /// similar to T-cell receptor beta-2 chain C region /// similar to T-cell receptor beta-1 chain C region /// similar to T-cell receptor beta-1 chain C region /// similar to T-cell receptor beta-2 chain C region /// similar to T-cell receptor beta-1 chain C region" Tcrb-J /// Tcrb-V13 /// LOC665500 ///

LOC665506 /// LOC669844 /// LOC669847 /// LOC674047 /// LOC674048 /// LOC676782  
 1426773\_at 0.90905 mitofusin 1 Mfn1  
 1426774\_at 0.99782 "poly (ADP-ribose) polymerase family, member 12" Parp12  
 1426775\_s\_at 0.91507 secretory carrier membrane protein 1 Scamp1  
 1426776\_at 0.98718 Wiskott-Aldrich syndrome-like (human) Wasl  
 1426777\_a\_at 1.02150 Wiskott-Aldrich syndrome-like (human) Wasl  
 1426778\_at 0.89111 dystroglycan 1 Dag1  
 1426779\_x\_at 0.90647 dystroglycan 1 Dag1  
 1426780\_at 0.95640 "DNA segment, Chr 14, ERATO Doi 436, expressed" D14Ertd436e  
 1426781\_at 0.84295 tRNA-yW synthesizing protein 1 homolog (S. cerevisiae) Tyw1  
 1426782\_at 0.85490 G protein-coupled receptor 125 Gpr125  
 1426783\_at 0.96181 GCN5 general control of amino acid synthesis-like 2 (yeast) Gcn512  
 1426784\_at 0.90057 tripartite motif protein 47 Trim47  
 1426785\_s\_at 1.24084 monoglyceride lipase Mgl1  
 1426786\_s\_at 1.01521 DEAH (Asp-Glu-Ala-His) box polypeptide 38 Dhx38  
 1426787\_at 0.96821 "Sfi1 homolog, spindle assembly associated (yeast) /// similar to spindle  
 assembly associated Sfi1 homolog isoform b /// similar to spindle assembly associated Sfi1 homolog  
 isoform b /// similar to Sfi1 homolog, spindle assembly associated (yeast)" Sfi1 /// LOC673404 ///  
 LOC673420 /// LOC673566  
 1426788\_a\_at 1.07009 structure specific recognition protein 1 Ssrp1  
 1426789\_s\_at 1.01749 structure specific recognition protein 1 Ssrp1  
 1426790\_at 1.00055 structure specific recognition protein 1 Ssrp1  
 1426791\_at 0.93345 RUN and SH3 domain containing 2 Rusc2  
 1426792\_s\_at 0.99430 RUN and SH3 domain containing 2 Rusc2  
 1426793\_a\_at 1.21569 ribosomal protein L14 Rpl14  
 1426794\_at 0.94038 "protein tyrosine phosphatase, receptor type, S" Ptprs  
 1426795\_at 0.89400 "protein tyrosine phosphatase, receptor type, S" Ptprs  
 1426796\_at 0.97007 karyopherin (importin) alpha 6 Kpna6  
 1426797\_at 1.01291 RIKEN cDNA 2700094F01 gene 2700094F01Rik  
 1426798\_a\_at 1.02959 --- ---  
 1426799\_at 1.09600 "RAB8B, member RAS oncogene family" Rab8b  
 1426800\_at 0.91272 "RAB8B, member RAS oncogene family /// similar to RAB8B, member RAS  
 oncogene family" Rab8b /// LOC670268  
 1426801\_at 1.03795 septin 8 8-Sep  
 1426802\_at 1.13832 septin 8 8-Sep  
 1426803\_at 1.10904 RNA binding motif protein 26 Rbm26  
 1426804\_at 0.99693 "SWI/SNF related, matrix associated, actin dependent regulator of chromatin,  
 subfamily a, member 4" Smarca4  
 1426805\_at 1.06020 "SWI/SNF related, matrix associated, actin dependent regulator of chromatin,  
 subfamily a, member 4" Smarca4  
 1426806\_at 1.27003 RIKEN cDNA 5830411E10 gene 5830411E10Rik  
 1426807\_at 0.91354 Leukotriene A4 hydrolase Lta4h  
 1426808\_at 1.21593 "lectin, galactose binding, soluble 3" Lgals3

1426809\_at 1.03209 RIKEN cDNA C430004E15 gene C430004E15Rik  
1426810\_at 1.15244 jumonji domain containing 1A Jmjd1a  
1426811\_at 1.00750 "protein phosphatase 2, regulatory subunit B (B56), beta isoform" Ppp2r5b  
1426812\_a\_at 1.02985 RIKEN cDNA 9130404D14 gene 9130404D14Rik  
1426813\_at 1.05160 LTV1 homolog (S. cerevisiae) Ltv1  
1426814\_at 0.92964 expressed sequence AU024582 AU024582  
1426815\_s\_at 0.92083 expressed sequence AU024582 AU024582  
1426816\_at 0.90105 coiled-coil domain containing 64 Ccdc64  
1426817\_at 1.05301 antigen identified by monoclonal antibody Ki 67 /// similar to Antigen KI-67  
Mki67 /// LOC638774  
1426818\_at 0.76042 arrestin domain containing 4 Arrdc4  
1426819\_at 0.94875 homeodomain interacting protein kinase 3 Hipk3  
1426820\_at 0.97323 RIKEN cDNA 2610507B11 gene 2610507B11Rik  
1426821\_at 0.87765 component of oligomeric golgi complex 8 Cog8  
1426822\_at 0.91856 "ras homolog gene family, member T2" Rhot2  
1426823\_s\_at 1.09056 "proteasome (prosome, macropain) activator subunit 4" Psme4  
1426824\_at 1.02661 "proteasome (prosome, macropain) activator subunit 4" Psme4  
1426825\_at 1.07969 formin-like 3 Fmnl3  
1426826\_at 1.03913 RNA binding motif protein 16 Rbm16  
1426827\_at 0.88852 RIKEN cDNA A730098D12 gene A730098D12Rik  
1426828\_at 0.90634 RIKEN cDNA 1300018I17 gene 1300018I17Rik  
1426829\_at 1.10842 retinoid X receptor interacting protein 110 Rxrip110  
1426830\_a\_at 0.98658 S-adenosylhomocysteine hydrolase-like 1 Ahcyl1  
1426831\_at 0.95516 S-adenosylhomocysteine hydrolase-like 1 Ahcyl1  
1426832\_at 0.78383 RIKEN cDNA 6330505F04 gene 6330505F04Rik  
1426833\_at 0.97349 "eukaryotic translation initiation factor 4 gamma, 3" Eif4g3  
1426834\_s\_at 0.93292 RIKEN cDNA D930015E06 gene D930015E06Rik  
1426835\_at 1.07719 methionyl aminopeptidase 1 Metap1  
1426836\_s\_at 1.12332 methionyl aminopeptidase 1 Metap1  
1426837\_at 1.14196 methionyl aminopeptidase 1 Metap1  
1426838\_at 1.00041 "polymerase (DNA-directed), delta 3, accessory subunit" Pold3  
1426839\_at 1.00122 "polymerase (DNA-directed), delta 3, accessory subunit" Pold3  
1426840\_at 0.97426 YTH domain family 3 Ythdf3  
1426841\_at 1.03202 YTH domain family 3 Ythdf3  
1426842\_at 0.94450 YTH domain family 3 Ythdf3  
1426843\_at 1.05324 RIKEN cDNA 1810013C15 gene 1810013C15Rik  
1426844\_a\_at 1.01115 programmed cell death 2-like Pcd2l  
1426845\_at 0.95548 programmed cell death 2-like Pcd2l  
1426846\_at 0.91980 centromere protein T Cenpt  
1426847\_at 0.92698 sirtuin 4 (silent mating type information regulation 2 homolog) 4 (S.  
cerevisiae) Sirt4  
1426848\_at 1.01745 "SEC24 related gene family, member B (S. cerevisiae)" Sec24b  
1426849\_at 1.04115 "SEC24 related gene family, member B (S. cerevisiae)" Sec24b

1426850\_a\_at 0.87502 mitogen activated protein kinase kinase 6 Map2k6  
 1426851\_a\_at 1.30404 nephroblastoma overexpressed gene Nov  
 1426852\_x\_at 1.46551 nephroblastoma overexpressed gene Nov  
 1426853\_at 1.26757 SET translocation Set  
 1426854\_a\_at 1.07353 SET translocation Set  
 1426855\_at 0.91747 "DNA segment, Chr 10, ERATO Doi 610, expressed" D10Erttd610e  
 1426856\_at 0.87369 hydroxysteroid dehydrogenase like 2 Hsd12  
 1426857\_a\_at 0.83636 hydroxysteroid dehydrogenase like 2 Hsd12  
 1426858\_at 0.51837 inhibin beta-B Inhbb  
 1426859\_at 0.79621 inhibin beta-B Inhbb  
 1426860\_at 1.08971 E1A binding protein p400 Ep400  
 1426861\_at 0.97096 aftiphilin Aftph  
 1426862\_at 1.00992 aftiphilin Aftph  
 1426863\_at 0.83131 "RNA binding motif protein, X chromosome" Rbmx  
 1426864\_a\_at 0.67627 neural cell adhesion molecule 1 Ncam1  
 1426865\_a\_at 0.72284 neural cell adhesion molecule 1 Ncam1  
 1426866\_at 0.91301 dermatan 4 sulfotransferase 1 D4st1  
 1426867\_at 1.07262 doublesex and mab-3 related transcription factor 2 Dmrt2  
 1426868\_x\_at 1.11707 lamin A Lmna  
 1426869\_at 1.10357 biregional cell adhesion molecule-related/down-regulated by oncogenes (Cdon)  
 binding protein Boc  
 1426870\_at 0.89451 F-box only protein 33 Fbxo33  
 1426871\_at 0.86147 F-box only protein 33 Fbxo33  
 1426872\_at 1.08451 Fc fragment of IgG binding protein Fcgbp  
 1426873\_s\_at 0.85630 junction plakoglobin Jup  
 1426874\_at 0.95617 enhancer of mRNA decapping 4 Edc4  
 1426875\_s\_at 1.10957 sulfiredoxin 1 homolog (S. cerevisiae) Srxn1  
 1426876\_at 0.87397 RIKEN cDNA 4732466D17 gene 4732466D17Rik  
 1426877\_a\_at 0.96430 polybromo 1 Pb1  
 1426878\_at 0.94796 polybromo 1 Pb1  
 1426879\_at 1.03265 RIKEN cDNA 1190005F20 gene 1190005F20Rik  
 1426880\_at 0.88277 cDNA sequence BC026657 BC026657  
 1426881\_at 0.99582 ubiquitin protein ligase E3C Ube3c  
 1426882\_at 0.97562 ubiquitin protein ligase E3C Ube3c  
 1426883\_at 0.78617 expressed sequence AW491445 AW491445  
 1426884\_at 0.92311 required for meiotic nuclear division 5 homolog A (S. cerevisiae) Rmnd5a  
 1426885\_a\_at 0.90676 CDK2 (cyclin-dependent kinase 2)-associated protein 1 Cdk2ap1  
 1426886\_at 1.03330 "ceroid-lipofuscinosis, neuronal 5" Cln5  
 1426887\_at 0.89430 nudix (nucleoside diphosphate linked moiety X)-type motif 11 Nudt11  
 1426888\_at 0.95952 euchromatic histone lysine N-methyltransferase 2 Ehmt2  
 1426889\_at 0.87523 RIKEN cDNA 4930566A11 gene 4930566A11Rik  
 1426890\_a\_at 1.09384 RNA polymerase II associated protein 1 Rpap1  
 1426891\_at 0.94840 RNA polymerase II associated protein 1 Rpap1

1426892\_at 0.85869 utrophin Utn  
1426893\_at 0.88783 RIKEN cDNA C230093N12 gene C230093N12Rik  
1426894\_s\_at 0.78102 RIKEN cDNA C230093N12 gene C230093N12Rik  
1426895\_at 0.87464 zinc finger protein 191 Zfp191  
1426896\_at 1.02784 zinc finger protein 191 Zfp191  
1426897\_at 0.97146 regulator of chromosome condensation 2 Rcc2  
1426898\_at 0.91088 mitogen-activated protein kinase kinase kinase 7 interacting protein 1  
Map3k7ip1  
1426899\_at 0.94601 "TBC1 domain family, member 23" Tbc1d23  
1426900\_at 1.04163 jumonji domain containing 1C Jmjd1c  
1426901\_s\_at 1.15782 calmodulin binding transcription activator 2 Camta2  
1426902\_at 0.98207 coenzyme Q6 homolog (yeast) Coq6  
1426903\_at 1.06114 fibronectin type III domain containing 3a Fndc3a  
1426904\_s\_at 0.93261 "DnaJ (Hsp40) homolog, subfamily C, member 10" Dnajc10  
1426905\_a\_at 0.93309 "DnaJ (Hsp40) homolog, subfamily C, member 10" Dnajc10  
1426906\_at 1.34391 interferon activated gene 203 Ifi203  
1426907\_s\_at 0.94805 DEAH (Asp-Glu-Ala-Asp/His) box polypeptide 57 Dhx57  
1426908\_at 1.16746 UDP-N-acetyl-alpha-D-galactosamine: polypeptide N-  
acetylgalactosaminyltransferase 7 Galnt7  
1426909\_at 1.07764 uridine-cytidine kinase 2 Uck2  
1426910\_at 0.95977 --- ---  
1426911\_at 0.93643 desmocollin 2 Dsc2  
1426912\_at 1.02279 ring finger and WD repeat domain 2 /// similar to constitutive  
photomorphogenic protein 1 Rfwd2 /// LOC621205  
1426913\_at 2.03842 lanosterol synthase Lss  
1426914\_at 1.04522 MARVEL (membrane-associating) domain containing 2 Marveld2  
1426915\_at 1.00630 death associated protein kinase 1 Dapk1  
1426916\_at 0.89543 secernin 3 Scrn3  
1426917\_s\_at 0.90275 secernin 3 Scrn3  
1426918\_at 0.94170 integrin beta 1 (fibronectin receptor beta) Itgb1  
1426919\_at 1.10555 --- ---  
1426920\_x\_at 0.87320 integrin beta 1 (fibronectin receptor beta) Itgb1  
1426921\_at 0.99772 "ATP-binding cassette, sub-family F (GCN20), member 1" Abcf1  
1426922\_s\_at 1.02655 HIV-1 Rev binding protein Hrb  
1426923\_at 1.06052 HIV-1 Rev binding protein Hrb  
1426924\_at 1.11850 membrane associated DNA binding protein MnaB  
1426925\_at 0.94754 membrane associated DNA binding protein MnaB  
1426926\_at 0.83863 "phospholipase C, gamma 2" Plcg2  
1426927\_at 0.91958 "adaptor-related protein complex 3, beta 2 subunit" Ap3b2  
1426928\_at 1.04787 coiled-coil domain containing 93 Ccdc93  
1426929\_at 1.04129 "bruno-like 4, RNA binding protein (Drosophila)" Brunol4  
1426930\_at 1.04266 "bruno-like 4, RNA binding protein (Drosophila)" Brunol4  
1426931\_s\_at 1.08777 "DNA segment, Chr 19, Brigham & Women's Genetics 1357 expressed /// SWI/

SNF related, matrix associated, actin dependent regulator of chromatin, subfamily a, member 2"

D19Bwg1357e /// Smarca2

1426932\_at 1.01968 "SWI/SNF related, matrix associated, actin dependent regulator of chromatin, subfamily a, member 2" Smarca2

1426933\_at 1.11189 oxidative-stress responsive 1 Oxsrl

1426934\_at 0.82757 NHS-like 1 Nhs1

1426935\_at 1.00057 RIKEN cDNA 6330590E21 gene 6330590E21Rik

1426936\_at 1.22192 RIKEN cDNA 2610305J24 gene /// cDNA sequence BC005512 /// hypothetical protein LOC215866 /// hypothetical protein LOC629242 /// similar to melanoma antigen /// hypothetical ENV polyprotein /// similar to melanoma antigen /// hypothetical protein LOC669019 /// similar to melanoma antigen /// hypothetical protein LOC669436 /// hypothetical protein LOC670270 /// similar to melanoma antigen 2610305J24Rik /// BC005512 /// LOC215866 /// LOC629242 /// LOC630153 /// LOC630525 /// LOC631386 /// LOC637482 /// LOC641366 /// LOC668904 /// LOC669019 /// LOC669231 /// LOC669436 /// LOC670270 /// LOC670719 /// LOC672061 /// LOC672196 /// LOC672939 /// LOC673876 /// LOC674912 /// LOC674927 /// LOC675168 /// LOC675410 /// LOC675706 /// LOC676247 /// LOC676718 /// LOC677506

1426937\_at 0.92073 RIKEN cDNA 6330406I15 gene 6330406I15Rik

1426938\_at 0.71507 neuro-oncological ventral antigen 1 /// similar to neuro-oncological ventral antigen 1 isoform 2 Nova1 /// LOC664883

1426939\_at 0.94521 "TSR2, 20S rRNA accumulation, homolog (*S. cerevisiae*)" Tsr2

1426940\_at 0.84905 "SID1 transmembrane family, member 2" Sidt2

1426941\_at 1.01450 --- ---

1426942\_at 0.98947 absent in melanoma 1 Aim1

1426943\_at 0.93574 integrator complex subunit 1 Ints1

1426944\_at 0.85419 F-box and WD-40 domain protein 8 Fbxw8

1426945\_at 1.14581 RAN binding protein 5 Ranbp5

1426946\_at 1.15267 RAN binding protein 5 Ranbp5

1426947\_x\_at 0.85493 "procollagen, type VI, alpha 2" Col6a2

1426948\_at 1.05219 translocated promoter region Tpr

1426949\_s\_at 1.07174 translocated promoter region Tpr

1426950\_at 0.91218 "poly (ADP-ribose) polymerase family, member 16" Parp16

1426951\_at 1.24860 cysteine rich transmembrane BMP regulator 1 (chordin like) Crim1

1426952\_at 1.03837 Rho GTPase activating protein 18 Arhgap18

1426953\_at 0.98116 high mobility group box 2-like 1 Hmgb2l1

1426954\_at 1.00191 tripartite motif protein 33 /// RIKEN cDNA 8030451N04 gene Trim33 /// 8030451N04Rik

1426955\_at 1.03000 "procollagen, type XVIII, alpha 1" Col18a1

1426956\_a\_at 0.95945 transformation related protein 53 binding protein 1 Trp53bp1

1426957\_at 0.97536 transformation related protein 53 binding protein 1 Trp53bp1  
 1426958\_at 1.27748 ribosomal protein S9 /// similar to ribosomal protein S9 Rps9 /// LOC272691  
 1426959\_at 0.96381 "3-hydroxybutyrate dehydrogenase, type 1" Bdh1  
 1426960\_a\_at 0.99079 fatty acid 2-hydroxylase Fa2h  
 1426961\_at 0.98243 PHD finger protein 20 Phf20  
 1426962\_at 1.03919 PHD finger protein 20 Phf20  
 1426963\_at 1.09402 phosphofurin acidic cluster sorting protein 2 Pacs2  
 1426964\_at 1.00648 RIKEN cDNA 3110003A17 gene 3110003A17Rik  
 1426965\_at 0.96446 RAS related protein 2a Rap2a  
 1426966\_at 1.02729 axin 1 Axin1  
 1426967\_at 1.02172 axin 1 Axin1  
 1426968\_a\_at 0.86595 retinol dehydrogenase 10 (all-trans) Rdh10  
 1426969\_at 1.05921 tripartite motif protein 23 Trim23  
 1426970\_a\_at 1.13137 ubiquitin-activating enzyme E1-like /// RIKEN cDNA D330022A01 gene  
 Ube11 /// D330022A01Rik  
 1426971\_at 1.32364 ubiquitin-activating enzyme E1-like Ube11  
 1426972\_at 0.89795 "SEC24 related gene family, member D (S. cerevisiae)" Sec24d  
 1426973\_at 0.92286 G protein-coupled receptor 153 Gpr153  
 1426974\_at 0.85887 RIKEN cDNA 4632413K17 gene 4632413K17Rik  
 1426975\_at 0.87827 RIKEN cDNA 4632413K17 gene 4632413K17Rik  
 1426976\_at 0.93425 ubiquitin specific peptidase 47 Usp47  
 1426977\_at 0.94977 ubiquitin specific peptidase 47 Usp47  
 1426978\_at 0.90583 "kelch-like 2, Mayven (Drosophila)" Klh12  
 1426979\_at 0.94473 MLX interacting protein Mlxip  
 1426980\_s\_at 0.97108 RIKEN cDNA E130012A19 gene E130012A19Rik  
 1426981\_at 0.89110 proprotein convertase subtilisin/kexin type 6 Pcsk6  
 1426982\_at 0.92055 FLYWCH-type zinc finger 1 Flywch1  
 1426983\_at 1.14792 formin binding protein 1 Fnbp1  
 1426984\_at 0.91877 RIKEN cDNA 2310067B10 gene 2310067B10Rik  
 1426985\_s\_at 1.03136 RIKEN cDNA 2810485I05 gene 2810485I05Rik  
 1426986\_at 0.97774 RIKEN cDNA 2810485I05 gene 2810485I05Rik  
 1426987\_at 0.95171 RIKEN cDNA 5430417L22 gene 5430417L22Rik  
 1426988\_at 0.97393 kelch domain containing 5 Klhdc5  
 1426989\_at 0.88328 calsynenin 3 Clstn3  
 1426990\_at 0.95273 cubilin (intrinsic factor-cobalamin receptor) Cubn  
 1426991\_at 0.78229 RIKEN cDNA 1810048J11 gene 1810048J11Rik  
 1426992\_at 0.83656 xenotropic and polytropic retrovirus receptor 1 Xpr1  
 1426993\_at 0.79931 xenotropic and polytropic retrovirus receptor 1 Xpr1  
 1426994\_at 0.85925 PH domain and leucine rich repeat protein phosphatase Phlpp  
 1426995\_a\_at 1.10139 "growth factor, erv1 (S. cerevisiae)-like (augmenter of liver regeneration)"  
 Gfer  
 1426996\_at 0.98720 expressed sequence AA409316 AA409316  
 1426997\_at 0.92898 thyroid hormone receptor alpha Thra

1426998\_at 0.98605 "zinc finger, AN1-type domain 3" Zfand3  
 1426999\_at 1.02036 zinc finger CCCH type containing 14 Zc3h14  
 1427000\_at 0.90302 "hepatic nuclear factor 4, alpha" Hnf4a  
 1427001\_s\_at 0.81690 "hepatic nuclear factor 4, alpha" Hnf4a  
 1427002\_s\_at 1.06164 arylsulfatase G Arsg  
 1427003\_at 1.04907 "protein phosphatase 2, regulatory subunit B (B56), gamma isoform" Ppp2r5c  
 1427004\_at 0.98484 F-box only protein 2 Fbxo2  
 1427005\_at 1.18058 polo-like kinase 2 (Drosophila) Plk2  
 1427006\_at 1.00020 Rap guanine nucleotide exchange factor (GEF) 1 Rapgef1  
 1427007\_at 0.91719 RIKEN cDNA 1200013B08 gene 1200013B08Rik  
 1427008\_at 1.11021 ring finger protein 43 Rnf43  
 1427009\_at 0.96389 "laminin, alpha 5 /// similar to Laminin alpha-5 chain precursor" Lama5 ///  
 LOC671909  
 1427010\_s\_at 0.99368 "laminin, alpha 5 /// similar to Laminin alpha-5 chain precursor" Lama5 ///  
 LOC671909  
 1427011\_a\_at 0.83396 LanC (bacterial lantibiotic synthetase component C)-like 1 Lancl1  
 1427012\_at 1.05567 LanC (bacterial lantibiotic synthetase component C)-like 1 Lancl1  
 1427013\_at 0.97895 carbonic anhydrase 9 Car9  
 1427014\_at 0.96011 DENN/MADD domain containing 4B Dennd4b  
 1427015\_at 1.02605 Riken cDNA C230021P08 gene C230021P08Rik  
 1427016\_at 0.80548 RIKEN cDNA 4932438A13 gene /// similar to CG4841-PA  
 4932438A13Rik /// LOC665732  
 1427017\_at 1.15694 special AT-rich sequence binding protein 2 Satb2  
 1427018\_at 1.03804 translin-associated factor X (Tsnax) interacting protein 1 Tsnaxip1  
 1427019\_at 1.02116 "protein tyrosine phosphatase, receptor type Z, polypeptide 1" Ptporz1  
 1427020\_at 1.04337 "scavenger receptor class A, member 3" Scara3  
 1427021\_s\_at 1.03629 ferritin heavy chain 1 Fth1  
 1427022\_at 1.05764 DEAD (Asp-Glu-Ala-Asp) box polypeptide 42 Ddx42  
 1427023\_at 0.90565 phytanoyl-CoA hydroxylase interacting protein-like Phyhip1  
 1427024\_at 1.19916 RIKEN cDNA 5033405K12 gene 5033405K12Rik  
 1427025\_at 0.86898 myotubularin related protein 7 Mtmr7  
 1427026\_at 0.88949 "myosin, heavy polypeptide 4, skeletal muscle" Myh4  
 1427027\_a\_at 0.94982 general transcription factor III A Gtf3a  
 1427028\_at 0.88978 leucine-rich repeat-containing G protein-coupled receptor 6 Lgr6  
 1427029\_at 0.86042 HtrA serine peptidase 3 Htra3  
 1427030\_at 0.81277 coiled-coil domain containing 52 Ccdc52  
 1427031\_s\_at 0.90401 coiled-coil domain containing 52 Ccdc52  
 1427032\_at 1.05219 hect domain and RLD 4 Herc4  
 1427033\_at 0.92588 dynamin binding protein Dnmbp  
 1427034\_at 1.04856 angiotensin I converting enzyme (peptidyl-dipeptidase A) 1 Ace  
 1427035\_at 1.11224 "solute carrier family 39 (zinc transporter), member 14" Slc39a14  
 1427036\_a\_at 1.10591 "eukaryotic translation initiation factor 4, gamma 1" Eif4g1  
 1427037\_at 0.95309 "eukaryotic translation initiation factor 4, gamma 1" Eif4g1



|              |         |                                                                                                  |                     |
|--------------|---------|--------------------------------------------------------------------------------------------------|---------------------|
| 1427038_at   | 0.96420 | preproenkephalin 1                                                                               | Penk1               |
| 1427039_at   | 0.95060 | epsin 1                                                                                          | Epn1                |
| 1427040_at   | 0.98009 | MyoD family inhibitor domain containing                                                          | Mdfic               |
| 1427041_at   | 0.99709 | cDNA sequence BC013712                                                                           | BC013712            |
| 1427042_at   | 0.84150 | "mal, T-cell differentiation protein 2"                                                          | Mal2                |
| 1427043_s_at | 0.85051 | cytosolic ovarian carcinoma antigen 1                                                            | Cova1               |
| 1427044_a_at | 0.95113 | amphiphysin                                                                                      | Amph                |
| 1427045_at   | 0.95720 | synaptopodin                                                                                     | Synpo               |
| 1427046_at   | 0.91773 | grainyhead-like 2 (Drosophila)                                                                   | Grhl2               |
| 1427047_at   | 1.03133 | nucleoporin 188                                                                                  | Nup188              |
| 1427048_at   | 0.88507 | smoothened homolog (Drosophila)                                                                  | Smo                 |
| 1427049_s_at | 0.91252 | smoothened homolog (Drosophila)                                                                  | Smo                 |
| 1427050_at   | 0.79573 | RIKEN cDNA 5730420B22 gene                                                                       | 5730420B22Rik       |
| 1427051_at   | 0.98644 | tankyrase 1 binding protein 1                                                                    | Tnks1bp1            |
| 1427052_at   | 0.92054 | acetyl-Coenzyme A carboxylase beta                                                               | Acacb               |
| 1427053_at   | 1.21470 | "ABI gene family, member 3 (NESH) binding protein"                                               | Abi3bp              |
| 1427054_s_at | 0.91727 | "ABI gene family, member 3 (NESH) binding protein"                                               | Abi3bp              |
| 1427055_at   | 0.82923 | thioesterase superfamily member 4                                                                | Them4               |
| 1427056_at   | 0.94593 | "a disintegrin-like and metallopeptidase (reprolysin type) with thrombospondin type 1 motif, 15" | Adamts15            |
| 1427057_at   | 1.11589 | RIKEN cDNA C630002B14 gene                                                                       | C630002B14Rik       |
| 1427058_at   | 1.13181 | eukaryotic translation initiation factor 4A1                                                     | Eif4a1              |
| 1427059_at   | 0.98645 | RIKEN cDNA 4732495E13 gene                                                                       | 4732495E13Rik       |
| 1427060_at   | 0.97068 | mitogen activated protein kinase 3                                                               | Mapk3               |
| 1427061_at   | 0.91091 | retinoblastoma binding protein 8                                                                 | Rbbp8               |
| 1427062_at   | 0.92821 | retinoblastoma binding protein 8                                                                 | Rbbp8               |
| 1427063_at   | 0.92503 | RIKEN cDNA 5330417C22 gene                                                                       | 5330417C22Rik       |
| 1427064_a_at | 1.05031 | scribbled homolog (Drosophila)                                                                   | Scrib               |
| 1427065_at   | 1.02565 | RIKEN cDNA 4933439F18 gene                                                                       | 4933439F18Rik       |
| 1427066_a_at | 0.90227 | RIKEN cDNA 4933439F18 gene                                                                       | 4933439F18Rik       |
| 1427067_at   | 0.92330 | RIKEN cDNA 4933439F18 gene                                                                       | 4933439F18Rik       |
| 1427068_x_at | 1.06905 | RIKEN cDNA 4933439F18 gene                                                                       | 4933439F18Rik       |
| 1427069_at   | 0.79328 | F-box protein 28                                                                                 | Fbxo28              |
| 1427070_at   | 0.94118 | RIKEN cDNA 5730407K14 gene                                                                       | 5730407K14Rik       |
| 1427071_at   | 1.14754 | F-box protein 42                                                                                 | Fbxo42              |
| 1427072_at   | 0.61436 | START domain containing 8                                                                        | Stard8              |
| 1427073_at   | 0.84727 | lactation elevated 1                                                                             | Lace1               |
| 1427074_at   | 0.91059 | protein-L-isoaspartate (D-aspartate) O-methyltransferase domain containing 2                     | Pcmdt2              |
| 1427075_s_at | 0.92043 | protein-L-isoaspartate (D-aspartate) O-methyltransferase domain containing 2                     | Pcmdt2              |
| 1427076_at   | 0.99818 | macrophage expressed gene 1 /// similar to macrophage expressed gene 1                           | Mpeg1 /// LOC671359 |

1427077\_a\_at 1.06020 "adaptor-related protein complex 2, beta 1 subunit" Ap2b1  
 1427078\_at 1.00150 sorting nexin 19 Snx19  
 1427079\_at 0.93105 "microtubule-associated protein, RP/EB family, member 3" Mapre3  
 1427080\_at 0.93037 RIKEN cDNA 2610036D13 gene 2610036D13Rik  
 1427081\_at 1.00747 RIKEN cDNA A630072M18 gene A630072M18Rik  
 1427082\_at 0.87137 RIKEN cDNA 4632417N05 gene 4632417N05Rik  
 1427083\_a\_at 0.98212 mitogen-activated protein kinase kinase kinase kinase 5 Map4k5  
 1427084\_a\_at 1.01030 mitogen-activated protein kinase kinase kinase kinase 5 Map4k5  
 1427085\_at 1.03167 RIKEN cDNA 2810432D09 gene 2810432D09Rik  
 1427086\_at 0.87737 slit homolog 3 (Drosophila) Slit3  
 1427087\_at 1.16542 LUC7-like 2 (S. cerevisiae) Luc7l2  
 1427088\_at 0.95358 cyclin T2 Ccnt2  
 1427089\_at 0.97068 cyclin T2 Ccnt2  
 1427090\_at 0.95623 "zinc finger, BED domain containing 4" Zbed4  
 1427091\_at 0.96915 expressed sequence AI481105 AI481105  
 1427092\_at 1.06846 --- ---  
 1427093\_at 0.91772 zinc finger protein 707 Zfp707  
 1427094\_at 0.95247 "polymerase (DNA directed), epsilon 2 (p59 subunit)" Pole2  
 1427095\_at 1.08519 CUB domain containing protein 1 Cdcpl  
 1427096\_s\_at 0.93317 "signal sequence receptor, delta" Ssr4  
 1427097\_at 1.01972 WW domain containing E3 ubiquitin protein ligase 1 Wwp1  
 1427098\_at 0.86029 WW domain containing E3 ubiquitin protein ligase 1 Wwp1  
 1427099\_at 0.92855 MYC-associated zinc finger protein (purine-binding transcription factor)  
 Maz  
 1427100\_at 1.00691 "meteorin, glial cell differentiation regulator" Metrn  
 1427101\_at 0.98250 "meteorin, glial cell differentiation regulator" Metrn  
 1427102\_at 1.00850 schlafen 4 Slfn4  
 1427103\_at 0.96242 "pleckstrin homology domain containing, family Q member 1" Plekhq1  
 1427104\_at 0.81106 zinc finger protein 612 Zfp612  
 1427105\_at 0.93343 RIKEN cDNA 2610510J17 gene 2610510J17Rik  
 1427106\_at 0.84850 zinc finger and BTB domain containing 3 Zbtb3  
 1427107\_at 0.86666 "solute carrier family 16 (monocarboxylic acid transporters), member 11"  
 Slc16a11  
 1427108\_at 0.97199 RIKEN cDNA 9530068E07 gene 9530068E07Rik  
 1427109\_at 0.98964 open reading frame 61 ORF61  
 1427110\_at 0.99794 "ribonucleoprotein, PTB-binding 1" Raver1  
 1427111\_s\_at 0.98149 "ribonucleoprotein, PTB-binding 1" Raver1  
 1427112\_at 0.95016 RIKEN cDNA 2700049H19 gene 2700049H19Rik  
 1427113\_s\_at 0.90802 RIKEN cDNA 2700049H19 gene 2700049H19Rik  
 1427114\_at 0.95943 tetratricopeptide repeat domain 19 Ttc19  
 1427115\_at 0.95082 "myosin, heavy polypeptide 3, skeletal muscle, embryonic" Myh3  
 1427116\_at 1.12307 SET domain containing 1A Setd1a  
 1427117\_at 1.03686 myotubularin related protein 3 Mtmr3

|              |         |                                                                                                  |               |          |
|--------------|---------|--------------------------------------------------------------------------------------------------|---------------|----------|
| 1427118_at   | 0.95748 | keratin 86                                                                                       | krt86         |          |
| 1427119_at   | 1.09928 | "serine peptidase inhibitor, Kazal type 4"                                                       | Spink4        |          |
| 1427120_at   | 1.01191 | zinc finger protein 26                                                                           | Zfp26         |          |
| 1427121_at   | 1.03067 | F-box only protein 4                                                                             | Fbxo4         |          |
| 1427122_at   | 1.02920 | "coatamer protein complex, subunit gamma 2, antisense 2"                                         |               | Copg2as2 |
| 1427123_s_at | 0.99155 | "coatamer protein complex, subunit gamma 2, antisense 2"                                         |               | Copg2as2 |
| 1427124_at   | 1.06094 | RIKEN cDNA 4932416H05 gene                                                                       | 4932416H05Rik |          |
| 1427125_s_at | 0.92283 | leucine rich repeat containing 41                                                                | Lrrc41        |          |
| 1427126_at   | 0.95029 | heat shock protein 1B                                                                            | Hspa1b        |          |
| 1427127_x_at | 0.85299 | heat shock protein 1B                                                                            | Hspa1b        |          |
| 1427128_at   | 0.98986 | "protein tyrosine phosphatase, non-receptor type 23"                                             | Ptpn23        |          |
| 1427129_a_at | 0.99099 | heterogeneous nuclear ribonucleoprotein R                                                        | Hnrpr         |          |
| 1427130_x_at | 0.97875 | RIKEN cDNA 1700021K02 gene                                                                       | 1700021K02Rik |          |
| 1427131_s_at | 0.95421 | leucine rich repeat containing 58                                                                | Lrrc58        |          |
| 1427132_at   | 0.98994 | SET binding factor 2                                                                             | Sbf2          |          |
| 1427133_s_at | 0.96212 | low density lipoprotein receptor-related protein 2                                               | Lrp2          |          |
| 1427134_at   | 1.43169 | "splicing factor, arginine/serine-rich 12"                                                       | Sfrs12        |          |
| 1427135_at   | 1.46769 | "splicing factor, arginine/serine-rich 12"                                                       | Sfrs12        |          |
| 1427136_s_at | 1.41384 | "splicing factor, arginine/serine-rich 12"                                                       | Sfrs12        |          |
| 1427137_at   | 0.97224 | carboxylesterase 5                                                                               | Ces5          |          |
| 1427138_at   | 0.83240 | RIKEN cDNA 0610010D24 gene                                                                       | 0610010D24Rik |          |
| 1427139_at   | 0.81197 | "a disintegrin-like and metallopeptidase (reprolysin type) with thrombospondin type 1 motif, 10" | Adamts10      |          |
| 1427140_at   | 1.12587 | plasmacytoma variant translocation 1                                                             | Pvt1          |          |
| 1427141_at   | 1.01644 | RIKEN cDNA 2700099C18 gene                                                                       | 2700099C18Rik |          |
| 1427142_s_at | 0.73572 | "jumonji, AT rich interactive domain 1B (Rbp2 like)"                                             | Jarid1b       |          |
| 1427143_at   | 0.87792 | "jumonji, AT rich interactive domain 1B (Rbp2 like)"                                             | Jarid1b       |          |
| 1427144_at   | 0.99976 | heterogeneous nuclear ribonucleoprotein L-like                                                   | Hnrpll        |          |
| 1427145_at   | 0.88397 | IQ motif and Sec7 domain 1                                                                       | Iqsec1        |          |
| 1427146_at   | 0.83009 | expressed sequence AI790298                                                                      | AI790298      |          |
| 1427147_at   | 1.01408 | RIKEN cDNA F730047E07 gene                                                                       | F730047E07Rik |          |
| 1427148_at   | 0.97393 | "praja 2, RING-H2 motif containing"                                                              | Pja2          |          |
| 1427149_at   | 0.82744 | "pleckstrin homology domain containing, family A member 6"                                       | Plekha6       |          |
| 1427150_at   | 0.87214 | myeloid/lymphoid or mixed-lineage leukemia 3                                                     | Mll3          |          |
| 1427151_at   | 0.82625 | glutamine and serine rich 1                                                                      | Qser1         |          |
| 1427152_at   | 0.98953 | glutamine and serine rich 1                                                                      | Qser1         |          |
| 1427153_at   | 1.03096 | "branched chain ketoacid dehydrogenase E1, beta polypeptide"                                     | Bckdhb        |          |
| 1427154_at   | 0.96187 | keratin 2                                                                                        | Krt2          |          |
| 1427155_at   | 0.92351 | FCH and double SH3 domains 1                                                                     | Fchsd1        |          |
| 1427156_s_at | 0.93445 | activating signal cointegrator 1 complex subunit 2                                               | Ascc2         |          |
| 1427157_at   | 1.05095 | coiled-coil domain containing 85A                                                                | Ccdc85a       |          |
| 1427158_at   | 0.97802 | mitochondrial ribosomal protein S30                                                              | Mrps30        |          |
| 1427159_at   | 0.99009 | cleavage and polyadenylation factor subunit homolog (S. cerevisiae)                              | Pcf11         |          |

1427160\_at 1.00641 cleavage and polyadenylation factor subunit homolog (*S. cerevisiae*) Pcf11  
 1427161\_at 1.01225 centromere protein F Cenpf  
 1427162\_a\_at 1.03898 "ELK4, member of ETS oncogene family" Elk4  
 1427163\_at 0.93063 ubiquitin protein ligase E3 component n-recogin 2 Ubr2  
 1427164\_at 1.07738 "interleukin 13 receptor, alpha 1" Il13ra1  
 1427165\_at 1.10982 "interleukin 13 receptor, alpha 1" Il13ra1  
 1427166\_a\_at 0.93854 receptor-like tyrosine kinase /// spastic paraplegia 7 homolog (human) Ryk /// Spg7  
 1427167\_at 0.96202 expressed sequence AI448196 AI448196  
 1427168\_a\_at 0.73570 "procollagen, type XIV, alpha 1" Col14a1  
 1427169\_at 0.77393 "amyotrophic lateral sclerosis 2 (juvenile) chromosome region, candidate 19 (human)" Als2cr19  
 1427170\_at 1.03295 "proteasome (prosome, macropain) subunit, alpha type, 8" Psma8  
 1427171\_at 1.15522 rearranged L-myc fusion sequence Rlf  
 1427172\_at 0.99295 oral-facial-digital syndrome 1 gene homolog (human) Ofd1  
 1427173\_a\_at 1.00241 mitochondrial ribosomal protein S33 Mrps33  
 1427174\_at 1.07779 RIKEN cDNA 3100002L24 gene /// RIKEN cDNA 9230108I15 gene /// hypothetical LOC329575 /// similar to gonadotropin inducible ovarian transcription factor 1 /// similar to zinc finger protein 709 /// similar to gonadotropin inducible ovarian transcription factor 1 /// similar to zinc finger protein 97 /// similar to gonadotropin inducible ovarian transcription factor 1 3100002L24Rik /// 9230108I15Rik /// LOC329575 /// LOC626832 /// LOC627914 /// LOC628147 /// LOC665043 /// LOC665078 /// LOC665211 /// LOC668030 /// LOC668039 /// LOC668066  
 1427175\_at 0.97104 expressed sequence AI428936 AI428936  
 1427176\_s\_at 0.91510 expressed sequence AI428936 AI428936  
 1427177\_at 0.99398 FYVE and coiled-coil domain containing 1 Fyco1  
 1427178\_at 1.07945 transmembrane channel-like gene family 4 Tmc4  
 1427179\_at 0.92616 keratin 33B Krt33b  
 1427180\_at 0.85197 "solute carrier family 27 (fatty acid transporter), member 3" Slc27a3  
 1427181\_at 1.08761 "DNA segment, Chr 18, ERATO Doi 653, expressed" D18Ertd653e  
 1427182\_s\_at 0.96888 "DNA segment, Chr 18, ERATO Doi 653, expressed" D18Ertd653e  
 1427183\_at 1.01062 epidermal growth factor-containing fibulin-like extracellular matrix protein 1 Efemp1  
 1427184\_at 1.05917 "T-cell receptor beta, variable 13" Tcrb-V13  
 1427185\_at 0.78190 myocyte enhancer factor 2A Mef2a  
 1427186\_a\_at 0.87223 myocyte enhancer factor 2A Mef2a  
 1427187\_at 0.85136 RIKEN cDNA 6030413G23 gene 6030413G23Rik  
 1427188\_at 0.94740 ariadne ubiquitin-conjugating enzyme E2 binding protein homolog 1 (Drosophila) Arih1  
 1427189\_at 1.02866 ariadne ubiquitin-conjugating enzyme E2 binding protein homolog 1 (Drosophila) Arih1  
 1427190\_at 0.88787 RIKEN cDNA 2900057D21 gene 2900057D21Rik

1427191\_at 0.61311 natriuretic peptide receptor 2 Npr2  
1427192\_a\_at 1.06324 bromodomain containing 8 Brd8  
1427193\_at 1.31707 bromodomain containing 8 Brd8  
1427194\_a\_at 1.06873 "excision repair cross-complementing rodent repair deficiency, complementation group 8" Ercc8  
1427195\_at 1.06058 "Mus musculus, clone IMAGE:3983419, mRNA" ---  
1427196\_at 0.96489 WNK lysine deficient protein kinase 4 Wnk4  
1427197\_at 1.17536 ataxia telangiectasia and Rad3 related Atr  
1427198\_at 1.09375 cDNA sequence BC022960 BC022960  
1427199\_at 0.96146 furry homolog-like (Drosophila) Fryl  
1427200\_at 0.97361 "zinc finger, RAN-binding domain containing 1" Zranb1  
1427201\_at 0.90595 "musculoskeletal, embryonic nuclear protein 1" Mustn1  
1427202\_at 1.00788 RIKEN cDNA 4833442J19 gene 4833442J19Rik  
1427203\_at 1.10317 myosin XVB Myo15b  
1427204\_at 0.97889 RIKEN cDNA 3322402L07 gene 3322402L07Rik  
1427205\_x\_at 0.95109 coiled-coil domain containing 46 Ccdc46  
1427206\_at 1.01355 AFG3(ATPase family gene 3)-like 2 (yeast) Afg3l2  
1427207\_s\_at 1.00276 AFG3(ATPase family gene 3)-like 2 (yeast) Afg3l2  
1427208\_at 0.95937 zinc finger protein 451 Zfp451  
1427209\_at 0.94844 "bromodomain adjacent to zinc finger domain, 2A" Baz2a  
1427210\_at 1.01069 "bromodomain adjacent to zinc finger domain, 2A" Baz2a  
1427211\_at 1.23789 keratin associated protein 8-1 Krtap8-1  
1427212\_at 1.03494 mitogen-activated protein kinase associated protein 1 Mapkap1  
1427213\_at 1.05598 "6-phosphofructo-2-kinase/fructose-2,6-biphosphatase 1" Pfkfb1  
1427214\_at 0.83246 agmatine ureohydrolase (agmatinase) Agmat  
1427215\_at 0.96847 acyl-CoA synthetase medium-chain family member 2 Acsm2  
1427216\_at 0.87410 interferon zeta Ifnz  
1427217\_at 0.88139 zinc finger protein 455 Zfp455  
1427218\_at 1.05693 kelch-like 11 (Drosophila) Klhl11  
1427219\_at 0.96805 --- ---  
1427220\_a\_at 0.97161 seminal vesicle secretion 5 Svs5  
1427221\_at 1.06014 X transporter protein 3 similar 1 gene Xtrp3s1  
1427222\_a\_at 1.02678 seminal vesicle protein 2 Svp2  
1427223\_a\_at 1.19251 acyl-CoA synthetase medium-chain family member 2 Acsm2  
1427224\_at 0.97385 Acyl-CoA synthetase medium-chain family member 2 Acsm2  
1427225\_at 1.23535 epsin 2 Epn2  
1427226\_at 1.12623 epsin 2 Epn2  
1427227\_at 1.01440 "gamma-aminobutyric acid (GABA-A) receptor, subunit gamma 1" Gabrg1  
1427228\_at 0.88653 "palladin, cytoskeletal associated protein" Palld  
1427229\_at 1.48997 3-hydroxy-3-methylglutaryl-Coenzyme A reductase Hmgcr  
1427230\_at 0.95068 RIKEN cDNA B930041F14 gene B930041F14Rik  
1427231\_at 0.76273 roundabout homolog 1 (Drosophila) Robo1  
1427232\_at 0.77395 teashirt zinc finger family member 1 Tshz1

1427233\_at 0.83827 teashirt zinc finger family member 1 Tshz1  
 1427234\_at 0.92077 "vang-like 1 (van gogh, Drosophila)" Vangl1  
 1427235\_at 0.95278 "ubiquitously transcribed tetratricopeptide repeat gene, X chromosome" Utx  
 1427236\_a\_at 0.93366 myeloid/lymphoid or mixed-lineage leukemia 5 Mll5  
 1427237\_at 0.96330 RIKEN cDNA 2410015M20 gene 2410015M20Rik  
 1427238\_at 0.96229 F-box protein 15 Fbxo15  
 1427239\_at 0.77406 intraflagellar transport 122 homolog (Chlamydomonas) Ift122  
 1427240\_at 1.04106 dedicator of cytokinesis 6 /// similar to Dedicator of cytokinesis protein 6  
 Dock6 /// LOC670024  
 1427241\_at 1.00122 poly(A) polymerase gamma Papolg  
 1427242\_at 0.99548 DEAD (Asp-Glu-Ala-Asp) box polypeptide 4 Ddx4  
 1427243\_at 0.84133 expressed sequence AA536743 AA536743  
 1427244\_at 0.88903 tetratricopeptide repeat domain 15 Ttc15  
 1427245\_at 0.91927 ADP-ribosylation factor GTPase activating protein 1 Arfgap1  
 1427246\_at 0.85979 "membrane associated guanylate kinase, WW and PDZ domain containing 1"  
 Magi1  
 1427247\_at 1.05045 "DNA segment, Chr 3, Brigham & Women's Genetics 0562 expressed"  
 D3Bwg0562e  
 1427248\_at 0.98736 Wolf-Hirschhorn syndrome candidate 2 (human) Whsc2  
 1427249\_x\_at 1.04564 major urinary protein 3 Mup3  
 1427250\_at 0.92468 "ATPase, Ca<sup>++</sup> transporting, cardiac muscle, slow twitch 2" Atp2a2  
 1427251\_at 0.84145 "ATPase, Ca<sup>++</sup> transporting, cardiac muscle, slow twitch 2" Atp2a2  
 1427252\_at 0.99645 "DMRT-like family B with proline-rich C-terminal, 1" Dmrtb1  
 1427253\_s\_at 1.07706 suppressor of zeste 12 homolog (Drosophila) Suz12  
 1427254\_at 0.98862 zinc finger protein 445 Zfp445  
 1427255\_s\_at 0.92319 zinc finger protein 445 Zfp445  
 1427256\_at 0.84703 chondroitin sulfate proteoglycan 2 Cspg2  
 1427257\_at 0.95810 chondroitin sulfate proteoglycan 2 Cspg2  
 1427258\_at 0.95673 tripartite motif protein 24 Trim24  
 1427259\_at 0.93642 tripartite motif protein 24 Trim24  
 1427260\_a\_at 0.98019 "tropomyosin 3, gamma" Tpm3  
 1427261\_at 1.06849 "WW, C2 and coiled-coil domain containing 1" Wwc1  
 1427262\_at 1.25650 inactive X specific transcripts Xist  
 1427263\_at 1.13864 inactive X specific transcripts Xist  
 1427264\_at 0.90998 "crystallin, gamma B" Crygb  
 1427265\_at 0.94073 breakpoint cluster region homolog Bcr  
 1427266\_at 1.02190 polybromo 1 Pb1  
 1427267\_at 1.05911 zinc finger protein 469 Zfp469  
 1427268\_at 0.97269 filaggrin /// similar to Filaggrin /// similar to Filaggrin Flg /// LOC620355 ///  
 LOC675741  
 1427269\_at 0.93065 "splicing factor, arginine/serine-rich 11" Sfrs11  
 1427270\_a\_at 0.93109 BSD domain containing 1 Bsdc1  
 1427271\_at 1.11836 BTB (POZ) domain containing 15 Btbd15

|              |                                                                                 |               |  |
|--------------|---------------------------------------------------------------------------------|---------------|--|
| 1427272_at   | 1.01497 BTB (POZ) domain containing 15                                          | Btbd15        |  |
| 1427273_at   | 1.00454 RIKEN cDNA D130054N24 gene                                              | D130054N24Rik |  |
| 1427274_at   | 0.91620 RIKEN cDNA D130054N24 gene                                              | D130054N24Rik |  |
| 1427275_at   | 0.91640 structural maintenance of chromosomes 4                                 | Smc4          |  |
| 1427276_at   | 0.89924 structural maintenance of chromosomes 4                                 | Smc4          |  |
| 1427277_at   | 0.98574 sine oculis-related homeobox 1 homolog (Drosophila)                     | Six1          |  |
| 1427278_at   | 1.04875 restin-like 2                                                           | Rsnl2         |  |
| 1427279_at   | 0.83142 ---                                                                     | ---           |  |
| 1427280_at   | 1.07572 "sodium channel, voltage-gated, type II, alpha 1"                       | Scn2a1        |  |
| 1427281_at   | 1.08314 "sodium channel, voltage-gated, type II, alpha 1"                       | Scn2a1        |  |
| 1427282_a_at | 1.10718 frataxin                                                                | Fxn           |  |
| 1427283_at   | 1.05755 myeloid/lymphoid or mixed-lineage leukemia 1                            | Mll1          |  |
| 1427284_a_at | 0.95028 tocopherol (alpha) transfer protein                                     | Ttpa          |  |
| 1427285_s_at | 1.21274 metastasis associated lung adenocarcinoma transcript 1 (non-coding RNA) | Malat1        |  |
| 1427286_at   | 0.88590 "DNA segment, Chr 11, Brigham & Women's Genetics 0517 expressed"        | D11Bwg0517e   |  |
| 1427287_s_at | 0.73887 "inositol 1,4,5-triphosphate receptor 2"                                | Itpr2         |  |
| 1427288_at   | 1.06928 "amyloid beta (A4) precursor protein-binding, family A, member 2"       | Apba2         |  |
| 1427289_at   | 0.97563 DDHD domain containing 1                                                | Ddhd1         |  |
| 1427290_at   | 1.08612 keratin 81                                                              | Krt81         |  |
| 1427291_at   | 1.05290 synaptonemal complex protein 1                                          | Sycp1         |  |
| 1427292_at   | 0.90246 "immunoglobulin lambda chain, variable 1"                               | Igl-V1        |  |
| 1427293_a_at | 1.08025 autism susceptibility candidate 2                                       | Auts2         |  |
| 1427294_a_at | 0.91600 RIKEN cDNA 1810073N04 gene                                              | 1810073N04Rik |  |
| 1427295_at   | 0.93771 RIKEN cDNA 1810073N04 gene                                              | 1810073N04Rik |  |
| 1427296_at   | 1.00799 cDNA sequence BC010304                                                  | BC010304      |  |
| 1427297_at   | 0.97941 mitochondrial ribosomal protein L9                                      | Mrpl9         |  |
| 1427298_at   | 0.95408 "dynamin 3, opposite strand"                                            | Dnm3os        |  |
| 1427299_at   | 1.02886 ribosomal protein S6 kinase polypeptide 3                               | Rps6ka3       |  |
| 1427300_at   | 0.95846 LIM homeobox protein 8                                                  | Lhx8          |  |
| 1427301_at   | 1.04857 CD48 antigen                                                            | Cd48          |  |
| 1427302_at   | 0.96475 ectonucleotide pyrophosphatase/phosphodiesterase 3                      | Enpp3         |  |
| 1427303_at   | 1.05418 ectonucleotide pyrophosphatase/phosphodiesterase 3                      | Enpp3         |  |
| 1427304_at   | 0.99450 vacuolar protein sorting 18 (yeast)                                     | Vps18         |  |
| 1427305_at   | 1.23459 "phosphatidylinositol glycan anchor biosynthesis, class A"              | Piga          |  |
| 1427306_at   | 1.05870 "ryanodine receptor 1, skeletal muscle"                                 | Ryr1          |  |
| 1427307_a_at | 1.08468 disabled homolog 1 (Drosophila)                                         | Dab1          |  |
| 1427308_at   | 1.03045 disabled homolog 1 (Drosophila)                                         | Dab1          |  |
| 1427309_at   | 0.97574 prolyl-tRNA synthetase (mitochondrial)(putative)                        | Pars2         |  |
| 1427310_at   | 1.17648 fetal Alzheimer antigen Falz                                            |               |  |
| 1427311_at   | 0.97663 fetal Alzheimer antigen Falz                                            |               |  |
| 1427312_at   | 0.90695 cardiomyopathy associated 5                                             | Cmya5         |  |

1427313\_at 1.00246 prostaglandin I receptor (IP) Ptgir  
1427314\_at 1.00075 transmembrane emp24 protein transport domain containing 7 Tmed7  
1427315\_at 0.99476 transmembrane emp24 protein transport domain containing 7 Tmed7  
1427316\_s\_at 0.76647 EST AA881470 AA881470  
1427317\_at 0.94882 antigenic determinant of rec-A protein Kin  
1427318\_s\_at 1.10815 "dysferlin /// fer-1-like 3, myoferlin (C. elegans)" Dysf /// Fer113  
1427319\_at 1.18169 RIKEN cDNA A230046K03 gene A230046K03Rik  
1427320\_at 1.06813 "coatomer protein complex, subunit gamma 2, antisense 2" Copg2as2  
1427321\_s\_at 1.03875 coxsackievirus and adenovirus receptor Cxadr  
1427322\_at 0.90267 bromodomain and WD repeat domain containing 1 Brwd1  
1427323\_s\_at 0.96359 "WD repeat domain, phosphoinositide interacting 1" Wipi1  
1427324\_at 0.81930 cDNA sequence BC022593 BC022593  
1427325\_s\_at 1.00554 expressed sequence AI597013 AI597013  
1427326\_at 1.08752 RIKEN cDNA 4732471D19 gene 4732471D19Rik  
1427327\_at 1.07174 paired immunoglobulin-like type 2 receptor alpha Pilra  
1427328\_a\_at 0.86904 CLIP associating protein 2 Clasp2  
1427329\_a\_at 1.00858 immunoglobulin heavy chain 6 (heavy chain of IgM) Igh-6  
1427330\_at 0.92703 cysteinyl-tRNA synthetase Cars  
1427331\_at 0.92613 adenosine A1 receptor Adora1  
1427332\_at 0.97177 "mediator of RNA polymerase II transcription, subunit 19 homolog (yeast)"  
Med19  
1427333\_s\_at 1.04563 "splicing factor, arginine/serine-rich 15 /// similar to splicing factor, arginine/  
serine-rich 15" Sfrs15 /// LOC670368  
1427334\_s\_at 1.06201 RIKEN cDNA 2810474O19 gene 2810474O19Rik  
1427335\_at 0.94892 RIKEN cDNA 6720456H20 gene 6720456H20Rik  
1427336\_at 0.95536 "aldehyde dehydrogenase 8 family, member A1" Aldh8a1  
1427337\_at 0.99032 "aldehyde dehydrogenase 8 family, member A1" Aldh8a1  
1427338\_at 0.90368 "ciliary rootlet coiled-coil, rootletin" Crocc  
1427339\_at 0.93425 "solute carrier family 30 (zinc transporter), member 2" Slc30a2  
1427340\_at 0.89317 regulator of G-protein signaling 6 Rgs6  
1427341\_at 0.87674 RIKEN cDNA E130103I17 gene E130103I17Rik  
1427342\_at 1.01206 FAST kinase domains 1 Fastkd1  
1427343\_at 0.97835 "RASD family, member 2" Rasd2  
1427344\_s\_at 1.10642 "RASD family, member 2" Rasd2  
1427345\_a\_at 0.76534 "sulfotransferase family 1A, phenol-preferring, member 1" Sult1a1  
1427346\_at 0.99118 ovary testis transcribed /// similar to ovary testis transcribed /// similar to ovary  
testis transcribed /// similar to ovary testis transcribed /// similar to ovary testis transcribed /// similar to  
ovary testis transcribed Ott /// LOC434863 /// LOC434864 /// LOC434865 /// LOC666184 ///  
LOC666260  
1427347\_s\_at 0.89628 "tubulin, beta 2a /// tubulin, beta 2b /// similar to tubulin, beta 3 /// similar to  
tubulin, beta 3" Tubb2a /// Tubb2b /// LOC665524 /// LOC671656  
1427348\_at 1.55759 zinc finger CCCH type containing 12A Zc3h12a  
1427349\_x\_at 0.98171 RIKEN cDNA 2810021G02 gene 2810021G02Rik



1427350\_a\_at 0.98231 GTP binding protein 6 (putative) Gtpbp6  
1427351\_s\_at 0.98935 immunoglobulin heavy chain 6 (heavy chain of IgM) Igh-6  
1427352\_at 0.82275 cDNA sequence BC031593 BC031593  
1427353\_at 1.50699 CLIP associating protein 1 Clasp1  
1427354\_at 0.92604 homeo box A4 Hoxa4  
1427355\_at 1.07849 "calcitonin/calcitonin-related polypeptide, alpha" Calca  
1427356\_at 0.82387 RIKEN cDNA 2310031A18 gene 2310031A18Rik  
1427357\_at 1.10336 cytidine deaminase Cda  
1427358\_a\_at 1.09128 death associated protein kinase 1 Dapk1  
1427359\_at 1.04666 RIKEN cDNA A630082K20 gene A630082K20Rik  
1427360\_at 0.89851 RIKEN cDNA 4930507D05 gene 4930507D05Rik  
1427361\_at 0.92098 homeo box C6 Hoxc6  
1427362\_x\_at 0.91702 homeo box C6 Hoxc6  
1427363\_at 2.21629 Myosin X Myo10  
1427364\_a\_at 1.08193 "ornithine decarboxylase, structural 1 /// similar to Ornithine decarboxylase (ODC) /// hypothetical protein LOC671973 /// similar to Ornithine decarboxylase (ODC)" Odc1 /// LOC639787 /// LOC666231 /// LOC668343 /// LOC670279 /// LOC671154 /// LOC671973 /// LOC673302  
1427365\_at 0.90383 keratin 86 krt86  
1427366\_at 0.99444 keratin associated protein 3-1 Krtap3-1  
1427367\_at 0.89779 EF-hand calcium binding domain 4A Efcab4a  
1427368\_x\_at 0.88673 feline sarcoma oncogene Fes  
1427369\_at 1.01184 "NACHT, leucine rich repeat and PYD containing 6" Nalp6  
1427370\_at 0.86771 amidohydrolase domain containing 1 Amdhd1  
1427371\_at 0.87948 "ATP-binding cassette, sub-family A (ABC1), member 8a" Abca8a  
1427372\_at 0.96152 "cytochrome P450, family 27, subfamily b, polypeptide 1" Cyp27b1  
1427373\_at 1.05027 adhesion molecule with Ig like domain 1 Amigo1  
1427374\_at 0.99967 "mucin 3, intestinal /// similar to mucin 17 /// similar to mucin 17" Muc3 /// LOC666339 /// LOC677034  
1427375\_at 1.11905 RNA (guanine-9-) methyltransferase domain containing 2 Rg9mtd2  
1427376\_a\_at 1.01935 mitogen-activated protein kinase kinase kinase 5 Map4k5  
1427377\_x\_at 0.93296 "hydroxy-delta-5-steroid dehydrogenase, 3 beta- and steroid delta-isomerase 3" Hsd3b3  
1427378\_at 0.85705 keratin 75 Krt75  
1427379\_at 1.20362 Neuropathy target esterase Nte  
1427380\_at 1.02187 kallikrein 1-related peptidase b3 Klk1b3  
1427381\_at 0.94331 immunoresponsive gene 1 Irg1  
1427382\_a\_at 1.04530 suppressor of variegation 3-9 homolog 1 (Drosophila) Suv39h1  
1427383\_at 0.94258 Iroquois related homeobox 6 (Drosophila) Irx6  
1427384\_at 0.85728 chromodomain helicase DNA binding protein 6 Chd6  
1427385\_s\_at 1.02366 "actinin, alpha 1" Actn1  
1427386\_at 0.99668 Rho guanine nucleotide exchange factor (GEF) 16 Arhgef16

1427387\_a\_at 0.75938 integrin beta 4 Itgb4  
1427388\_at 0.98564 leucine rich repeat containing 2 Lrrc2  
1427389\_at 1.17753 cDNA sequence BC021785 BC021785  
1427390\_at 1.00072 "biogenesis of lysosome-related organelles complex-1, subunit 3" Bloc1s3  
1427391\_a\_at 0.84560 "procollagen, type XII, alpha 1" Col12a1  
1427392\_at 0.99629 Down syndrome cell adhesion molecule-like 1 Dscaml1  
1427393\_at 1.00203 coagulation factor IX F9  
1427394\_at 1.01260 "insulin-like growth factor 2, antisense" Igf2as  
1427395\_a\_at 0.84762 "aldehyde dehydrogenase family 1, subfamily A3" Aldh1a3  
1427396\_a\_at 0.97013 "cold shock domain containing E1, RNA binding" Csde1  
1427397\_at 1.13597 RIKEN cDNA 2810046L04 gene 2810046L04Rik  
1427398\_at 0.96703 mucin 4 Muc4  
1427399\_a\_at 0.88528 nuclear RNA export factor 7 Nxf7  
1427400\_at 0.95191 ladybird homeobox homolog 1 (Drosophila) Lbx1  
1427401\_at 0.97220 "cholinergic receptor, nicotinic, alpha polypeptide 5" Chrna5  
1427402\_at 0.96047 polymerase (RNA) II (DNA directed) polypeptide F Polr2f  
1427403\_at 0.92775 "solute carrier organic anion transporter family, member 1a5" Slco1a5  
1427404\_x\_at 1.04680 "similar to enolase 1, alpha non-neuron" LOC433182  
1427405\_s\_at 0.93581 RAB11 family interacting protein 5 (class I) Rab11fip5  
1427406\_at 1.09055 thyroid hormone receptor interactor 11 Trip11  
1427407\_s\_at 0.98767 thyroid hormone receptor interactor 11 Trip11  
1427408\_a\_at 0.96973 thyroid hormone receptor associated protein 3 Thrap3  
1427409\_at 0.92267 membrane-associated ring finger (C3HC4) 9 9-Mar  
1427410\_at 0.54320 "deleted in lymphocytic leukemia, 2" Dleu2  
1427411\_s\_at 0.49405 "deleted in lymphocytic leukemia, 2" Dleu2  
1427412\_s\_at 0.96650 Rap guanine nucleotide exchange factor (GEF) 6 Rapgef6  
1427413\_a\_at 1.17879 "CUG triplet repeat, RNA binding protein 1" Cugbp1  
1427414\_at 1.00148 "protein kinase, cAMP dependent regulatory, type II alpha" Prkar2a  
1427415\_at 1.04510 F-box protein 43 Fbxo43  
1427416\_x\_at 1.03900 similar to dual specificity phosphatase 7 LOC674944  
1427417\_at 1.13222 sex comb on midleg-like 4 (Drosophila) Scml4  
1427418\_a\_at 1.17056 "hypoxia inducible factor 1, alpha subunit" Hif1a  
1427419\_x\_at 1.03888 chemokine (C-C motif) receptor 9 Ccr9  
1427420\_at 0.98956 "NK6 transcription factor related, locus 2 (Drosophila)" Nkx6-2  
1427421\_at 1.03584 t-complex protein 10b Tcp10b  
1427422\_at 0.93612 similar to hepatocellular carcinoma-associated gene TD26 LOC624219  
1427423\_at 0.99185 RIKEN cDNA 2810410C14 gene 2810410C14Rik  
1427424\_at 1.07788 UDP-N-acetyl-alpha-D-galactosamine:polypeptide N-acetylgalactosaminyltransferase 6 Galnt6  
1427425\_at 1.22119 RIKEN cDNA 9130208E07 gene 9130208E07Rik  
1427426\_at 1.00339 "potassium voltage-gated channel, subfamily Q, member 5" Kcnq5  
1427427\_at 0.97669 ryanodine receptor 3 Ryr3  
1427428\_at 1.02378 "C-type lectin domain family 4, member g" Clec4g

1427429\_at 1.36065 colony stimulating factor 2 (granulocyte-macrophage) Csf2  
1427430\_at 0.86648 expressed sequence AI848100 AI848100  
1427431\_at 0.89145 --- ---  
1427432\_a\_at 1.07096 "splicing factor, arginine/serine-rich 10 (transformer 2 homolog, Drosophila)" Sfrs10  
1427433\_s\_at 0.94992 homeo box A3 Hoxa3  
1427434\_at 0.91360 --- ---  
1427435\_at 1.03738 --- ---  
1427436\_at 0.88935 sine oculis-related homeobox 2 homolog (Drosophila) Six2  
1427437\_at 0.80356 RIKEN cDNA 2610203C20 gene 2610203C20Rik  
1427438\_at 1.08972 "Phosphatidylinositol-4-phosphate 5-kinase, type II, beta" Pip5k2b  
1427439\_s\_at 1.11195 protein arginine N-methyltransferase 5 Prmt5  
1427440\_a\_at 0.64371 afamin Afm  
1427441\_a\_at 0.95987 "succinate-Coenzyme A ligase, GDP-forming, beta subunit" Suclg2  
1427442\_a\_at 0.86711 amyloid beta (A4) precursor protein App  
1427443\_at 1.11731 Hypothetical protein LOC625794 LOC625794  
1427444\_at 0.86067 "ATP-binding cassette, sub-family F (GCN20), member 1" Abcf1  
1427445\_a\_at 1.16473 titin Ttn  
1427446\_s\_at 1.05038 titin Ttn  
1427447\_a\_at 0.91297 TRIO and F-actin binding protein Triobp  
1427448\_at 0.97197 "rabaptin, RAB GTPase binding effector protein 1" Rabep1  
1427449\_a\_at 0.92444 ADP-ribosylhydrolase like 2 Adprhl2  
1427450\_x\_at 1.01997 myosin IB Myo1b  
1427451\_a\_at 0.89082 cDNA sequence BC018473 BC018473  
1427452\_at 1.01207 ribosomal protein L7 Rpl7  
1427453\_at 0.96311 cDNA sequence BC018473 BC018473  
1427454\_at 1.01830 homeo box C6 Hoxc6  
1427455\_x\_at 1.01837 "immunoglobulin kappa chain, constant region /// immunoglobulin kappa chain variable 28 (V28) /// immunoglobulin kappa chain variable 8 (V8)-16" Igk-C /// Igk-V28 /// Igk-V8-16  
1427456\_at 0.85142 WD repeat and FYVE domain containing 3 Wdfy3  
1427457\_a\_at 0.91023 bone morphogenetic protein 1 Bmp1  
1427458\_at 0.94252 bone morphogenetic protein 1 Bmp1  
1427459\_at 0.80399 "carboxypeptidase N, polypeptide 2" Cpn2  
1427460\_at 1.02664 "TAF4A RNA polymerase II, TATA box binding protein (TBP)-associated factor" Taf4a  
1427461\_at 1.02167 cDNA sequence BC005561 BC005561  
1427462\_at 1.21825 E2F transcription factor 3 E2f3  
1427463\_at 0.87106 CAS1 domain containing 1 Casd1  
1427464\_s\_at 0.94173 heat shock 70kD protein 5 (glucose-regulated protein) Hspa5  
1427465\_at 0.83207 "ATPase, Na+/K+ transporting, alpha 2 polypeptide" Atp1a2  
1427466\_at 1.01254 CDC91 cell division cycle 91-like 1 (S. cerevisiae) Cdc9111  
1427467\_a\_at 0.93425 retinitis pigmentosa GTPase regulator Rpgr

1427468\_at 0.94621 "protein phosphatase 3, catalytic subunit, beta isoform" Ppp3cb  
1427469\_at 0.86874 helicase with zinc finger domain Helz  
1427470\_s\_at 1.14205 N-ethylmaleimide sensitive fusion protein attachment protein beta Napb  
1427471\_at 0.83286 F-box and leucine-rich repeat protein 3 Fbxl3  
1427472\_a\_at 0.92840 "complement component 8, beta subunit" C8b  
1427473\_at 0.98389 "glutathione S-transferase, mu 3" Gstm3  
1427474\_s\_at 0.94345 "glutathione S-transferase, mu 3" Gstm3  
1427475\_a\_at 0.89486 similar to PDZ and LIM domain protein 5 (Enigma homolog) (Enigma-like  
PDZ and LIM domains protein) LOC669660  
1427476\_a\_at 0.96250 tripartite motif protein 32 Trim32  
1427477\_at 1.05184 "transmembrane protease, serine 13" Tmprss13  
1427478\_at 0.88857 ubiquitin specific peptidase 12 Usp12  
1427479\_at 1.09634 eukaryotic translation initiation factor 1A /// similar to Eukaryotic translation  
initiation factor 1A (eIF-1A) (eIF-4C) /// similar to GLE1 RNA export mediator-like (yeast /// similar to  
Eukaryotic translation initiation factor 1A (eIF-1A) (eIF-4C) /// similar to Eukaryotic translation  
initiation factor 1A (eIF-1A) (eIF-4C) /// similar to X-linked eukaryotic translation initiation factor  
1A /// similar to X-linked eukaryotic translation initiation factor 1A /// similar to X-linked eukaryotic  
translation initiation factor 1A /// similar to X-linked eukaryotic translation initiation factor 1A ///  
similar to X-linked eukaryotic translation initiation factor 1A /// similar to X-linked eukaryotic  
translation initiation factor 1A /// similar to X-linked eukaryotic translation initiation factor 1A ///  
similar to X-linked eukaryotic translation initiation factor 1A /// similar to X-linked eukaryotic  
translation initiation factor 1A /// similar to X-linked eukaryotic translation initiation factor 1A  
Eif1a /// MGC107533 /// LOC432715 /// LOC435337 /// LOC544881 /// LOC544883 /// LOC546233 ///  
LOC623167 /// LOC627878 /// LOC627881 /// LOC630607 /// LOC640794 /// LOC641136 ///  
LOC666806 /// LOC666862  
1427480\_at 0.99967 liver-expressed antimicrobial peptide 2 Leap2  
1427481\_a\_at 1.02657 "ATPase, Na+/K+ transporting, alpha 3 polypeptide" Atp1a3  
1427482\_a\_at 1.06432 carbonic anhydrase 8 /// similar to Carbonic anhydrase-related protein (CARP)  
(CA-VIII) Car8 /// LOC676792  
1427483\_at 1.06357 "solute carrier family 25 (mitochondrial carrier, phosphate carrier), member  
24" Slc25a24  
1427484\_at 1.16592 echinoderm microtubule associated protein like 5 Eml5  
1427485\_at 0.93639 leiomodulin 1 (smooth muscle) Lmod1  
1427486\_at 1.26490 "protein tyrosine phosphatase, receptor type, B" Ptpnb2  
1427487\_at 1.04107 --- ---  
1427488\_a\_at 0.99181 baculoviral IAP repeat-containing 6 Birc6  
1427489\_at 0.95521 integrin alpha 8 Itga8  
1427490\_at 0.92982 "ATP-binding cassette, sub-family B (MDR/TAP), member 7" Abcb7  
1427491\_at 1.22705 NOL1/NOP2/Sun domain family 6 Nsun6  
1427492\_at 0.99974 premature ovarian failure 1B Pof1b  
1427493\_at 0.95886 sodium channel and clathrin linker 1 Sclt1  
1427494\_at 0.95249 homeo box B7 /// homeo box B8 Hoxb7 /// Hoxb8  
1427495\_at 0.89405 "sodium channel, voltage-gated, type VII, alpha" Scn7a

1427496\_at 1.00069 centrosomal protein 152 Cep152  
1427497\_at 0.92739 RIKEN cDNA 2610015P09 gene 2610015P09Rik  
1427498\_a\_at 0.98639 sperm associated antigen 5 Spag5  
1427499\_at 0.86380 zinc finger protein 81 Zfp81  
1427500\_at 1.01292 signal peptidase complex subunit 1 homolog (*S. cerevisiae*) Spcs1  
1427501\_at 0.97816 cDNA sequence BC007180 BC007180  
1427502\_at 1.06245 a disintegrin and metallopeptidase domain 4 Adam4  
1427503\_at 0.92163 expressed sequence AI324046 AI324046  
1427504\_s\_at 0.99464 "splicing factor, arginine/serine-rich 2 (SC-35)" Sfrs2  
1427505\_a\_at 0.82794 CASP2 and RIPK1 domain containing adaptor with death domain Cradd  
1427506\_at 1.06579 peptidylprolyl isomerase (cyclophilin) like 5 Ppil5  
1427507\_at 0.91527 tripartite motif protein 17 Trim17  
1427508\_at 0.97757 arylsulfatase i Arsi  
1427509\_at 0.98604 BAI1-associated protein 3 Baiap3  
1427510\_at 0.49545 "guanine nucleotide binding protein, alpha inhibiting 1" Gnai1  
1427511\_at 1.56679 Beta-2 microglobulin B2m  
1427512\_a\_at 1.02173 "laminin, alpha 3 /// similar to Laminin alpha-3 chain precursor (Nicein alpha subunit)" Lama3 /// LOC669814  
1427513\_at 1.12925 cDNA sequence BC024137 BC024137  
1427514\_at 1.06121 hypothetical protein LOC624295 LOC624295  
1427515\_at 1.07314 RIKEN cDNA A530088I07 gene A530088I07Rik  
1427516\_a\_at 0.98062 biregional cell adhesion molecule-related/down-regulated by oncogenes (Cdon) binding protein Boc  
1427517\_at 0.91299 biregional cell adhesion molecule-related/down-regulated by oncogenes (Cdon) binding protein Boc  
1427518\_at 0.96108 cDNA sequence D10627 D10627  
1427519\_at 0.86525 adenosine A2a receptor Adora2a  
1427520\_a\_at 0.90326 "myosin, heavy polypeptide 1, skeletal muscle, adult" Myh1  
1427521\_a\_at 1.03797 RIKEN cDNA 9930023K05 gene 9930023K05Rik  
1427522\_at 0.88297 Rho GTPase activating protein 20 Arhgap20  
1427523\_at 0.93012 sine oculis-related homeobox 3 homolog (*Drosophila*) /// RIKEN cDNA E130112M24 gene Six3 /// E130112M24Rik  
1427524\_a\_at 0.98000 RIKEN cDNA 4930548G07 gene 4930548G07Rik  
1427525\_at 1.00663 CD151 antigen Cd151  
1427526\_at 1.07978 FGFR1 oncogene partner 2 Fgfr1op2  
1427527\_a\_at 1.03643 parathyroid hormone-like peptide Pthlh  
1427528\_a\_at 0.66881 Eph receptor A7 EphA7  
1427529\_at 0.81426 frizzled homolog 9 (*Drosophila*) Fzd9  
1427530\_at 1.00702 bicaudal D homolog 1 (*Drosophila*) Bicd1  
1427531\_a\_at 0.95176 "solute carrier family 22 (organic cation transporter), member 18" Slc22a18  
1427532\_at 0.95984 T cell receptor associated transmembrane adaptor 1 Trat1  
1427533\_at 1.44959 ALS2 C-terminal like Als2cl  
1427534\_at 0.95117 RIKEN cDNA 4930535I16 gene 4930535I16Rik

1427535\_s\_at 0.86454 expressed sequence AW822216 AW822216  
1427536\_at 0.95893 "Adult male olfactory brain cDNA, RIKEN full-length enriched library, clone:6430562O12 product:hypothetical protein, full insert sequence" ---  
1427537\_at 0.90665 epiplakin 1 Eppk1  
1427538\_at 0.91051 zinc finger protein 369 Zfp369  
1427539\_a\_at 1.19052 ZW10 interactor Zwint  
1427540\_at 1.37087 ZW10 interactor Zwint  
1427541\_x\_at 0.98191 hyaluronan mediated motility receptor (RHAMM) Hmnr  
1427542\_at 0.87089 RIKEN cDNA 5330439J01 gene 5330439J01Rik  
1427543\_s\_at 0.97960 "ubiquitin-activating enzyme E1, Chr Y 1" Ube1y1  
1427544\_a\_at 1.34219 poly (A) polymerase alpha Papola  
1427545\_at 1.01405 sex comb on midleg-like 4 (Drosophila) Scml4  
1427546\_at 1.05959 "ATP-binding cassette, sub-family A (ABC1), member 8b" Abca8b  
1427547\_a\_at 1.03401 "solute carrier family 26, member 3" Slc26a3  
1427548\_a\_at 1.09747 "chloride channel, nucleotide-sensitive, 1A" Clns1a  
1427549\_s\_at 0.95543 keratin associated protein 16-10 /// keratin associated protein 16-3 /// keratin associated protein 16-6 Krtap16-10 /// Krtap16-3 /// Krtap16-6  
1427550\_at 0.98827 paternally expressed 10 Peg10  
1427551\_at 0.97620 ubiquitin specific peptidase 29 Usp29  
1427552\_a\_at 0.95573 glutathione transferase zeta 1 (maleylacetoacetate isomerase) Gstz1  
1427553\_at 1.08223 hypothetical protein LOC628926 LOC628926  
1427554\_at 1.00277 "helicase, mus308-like (Drosophila)" Hel308  
1427555\_at 0.89991 cDNA sequence BC032281 BC032281  
1427556\_at 0.98497 "myosin, light polypeptide kinase 2, skeletal muscle /// similar to Myosin light chain kinase 2, skeletal/cardiac muscle (MLCK2)" Mylk2 /// LOC669275  
1427557\_at 0.99175 "asparagine-linked glycosylation 12 homolog (yeast, alpha-1,6-mannosyltransferase)" Alg12  
1427558\_s\_at 0.95565 "asparagine-linked glycosylation 12 homolog (yeast, alpha-1,6-mannosyltransferase)" Alg12  
1427559\_a\_at 1.08652 activating transcription factor 2 Atf2  
1427560\_at 0.99687 sine oculis-related homeobox 5 homolog (Drosophila) Six5  
1427561\_a\_at 0.70387 afamin Afm  
1427562\_a\_at 1.09682 "protein kinase C, alpha" Prkca  
1427563\_at 0.91821 "distal-less homeobox 6, antisense" Dlx6as  
1427564\_at 1.27548 diaphanous homolog 2 (Drosophila) Diap2  
1427565\_a\_at 1.02686 "ATP-binding cassette, sub-family C (CFTR/MRP), member 5" Abcc5  
1427566\_at 1.06788 "WAP, FS, Ig, KU, and NTR-containing protein 1" Wfikn1  
1427567\_a\_at 1.02053 "tropomyosin 3, gamma" Tpm3  
1427568\_a\_at 0.81472 intraflagellar transport 80 homolog (Chlamydomonas) Ift80  
1427569\_a\_at 1.12048 utrophin Utrn  
1427570\_at 1.04266 signal recognition particle receptor ('docking protein') Srpr  
1427571\_at 1.08973 sonic hedgehog Shh  
1427572\_at 1.12720 Leucine rich repeat containing 51 Lrrc51

1427573\_at 1.03243 cysteine-rich hydrophobic domain 1 Chic1  
 1427574\_s\_at 1.16237 SH3 domain protein D19 Sh3d19  
 1427575\_at 0.96472 F-box and WD-40 domain protein 14 Fbxw14  
 1427576\_at 0.98005 immunoglobulin kappa chain variable 28 (V28) /// immunoglobulin kappa chain variable 8 (V8) /// immunoglobulin kappa chain /// immunoglobulin kappa chain variable 21 (V21) Igk-V28 /// Igk-V8 /// LOC545854 /// Igk-V21  
 1427577\_x\_at 0.79810 immunoglobulin kappa chain variable 28 (V28) /// immunoglobulin kappa chain variable 8 (V8) /// immunoglobulin kappa chain /// immunoglobulin kappa chain variable 6-23 /// immunoglobulin kappa chain variable 19 (V19)-17 /// immunoglobulin kappa chain variable 19 (V19)-14 /// immunoglobulin kappa chain variable 19 (V19)-13 /// similar to Ig kappa chain V-V region MPC11 precursor /// similar to Ig kappa chain V-V region MPC11 precursor /// similar to Ig kappa chain V-V region MPC11 precursor /// similar to Ig kappa chain V-V region MPC11 precursor /// immunoglobulin kappa chain variable 21 (V21) Igk-V28 /// Igk-V8 /// LOC545854 /// Igkv6-23 /// Igk-V19-17 /// Igk-V19-14 /// Igk-V19-13 /// LOC669070 /// LOC672450 /// LOC673123 /// LOC676136 /// LOC676175 /// Igk-V21  
 1427578\_a\_at 1.14985 integrin beta 4 binding protein Itgb4bp  
 1427579\_at 0.85712 "rhomoid, veinlet-like 3 (Drosophila)" Rhbdl3  
 1427580\_a\_at 1.06130 RNA imprinted and accumulated in nucleus Rian  
 1427581\_at 0.96078 hypermethylated in cancer 2 Hic2  
 1427582\_at 0.89416 fibroblast growth factor 6 Fgf6  
 1427583\_at 0.89820 RIKEN cDNA 4921505C17 gene 4921505C17Rik  
 1427584\_at 0.86956 angiominin Amot  
 1427585\_at 1.02524 --- ---  
 1427586\_at 1.04861 "sema domain, immunoglobulin domain (Ig), transmembrane domain (TM) and short cytoplasmic domain, (semaphorin) 4B" Sema4b  
 1427587\_at 1.08051 zinc finger protein 28 Zfp28  
 1427588\_a\_at 0.96019 dystrobrevin alpha Dtna  
 1427589\_at 0.93731 RIKEN cDNA 8430419L09 gene 8430419L09Rik  
 1427590\_at 0.92281 zinc finger protein 39 Zfp39  
 1427591\_at 0.95456 chloride channel 1 Clcn1  
 1427592\_at 0.97883 protocadherin 7 Pcdh7  
 1427593\_at 0.87797 tripartite motif protein 8 Trim8  
 1427594\_at 1.05636 zinc finger protein 697 Zfp697  
 1427595\_at 1.15444 acetyl-Coenzyme A carboxylase alpha /// similar to acetyl-coenzyme A carboxylase alpha Acaca /// LOC672245  
 1427596\_at 0.93575 "X (inactive)-specific transcript, antisense" Tsix  
 1427597\_at 1.08973 "pleckstrin homology domain containing, family H (with MyTH4 domain) member 2" Plekhh2  
 1427598\_at 1.03897 Prader-Willi chromosome region 1 homolog (human) Pwcr1  
 1427599\_at 0.97251 "bol, boule-like (Drosophila)" Boll  
 1427600\_at 1.01086 "Tumor necrosis factor receptor superfamily, member 19" Tnfrsf19  
 1427601\_at 1.17694 RIKEN cDNA 9430022F06 gene 9430022F06Rik  
 1427602\_at 1.16764 diabetic embryopathy 1 Dep1

1427603\_at 1.02226 activating transcription factor 7 interacting protein 2 Atf7ip2  
 1427604\_a\_at 0.97990 "ATPase, class II, type 9A" Atp9a  
 1427605\_at 0.97885 homeo box B3 Hoxb3  
 1427606\_at 1.01268 "ubiquitin specific peptidase 27, X chromosome" Usp27x  
 1427607\_at 0.94985 "calcium channel, voltage-dependent, T type, alpha 1H subunit" Cacna1h  
 1427608\_a\_at 0.95129 "T-cell receptor gamma, constant region" Tcr-g-C  
 1427609\_at 0.91741 SRY-box containing gene 14 Sox14  
 1427610\_at 0.64304 desmoplakin Dsp  
 1427611\_at 1.03225 growth hormone releasing hormone receptor Ghrhr  
 1427612\_at 1.06995 defensin beta 9 Defb9  
 1427613\_at 0.90286 cDNA sequence AY074887 AY074887  
 1427614\_at 1.00879 prolactin induced protein Pip  
 1427615\_at 1.06849 integrin alpha 4 Itga4  
 1427616\_at 0.97917 "Mus musculus, clone IMAGE:5362978" ---  
 1427617\_at 0.94173 fucosyltransferase 10 Fut10  
 1427618\_at 0.96679 cadherin 9 Cdh9  
 1427619\_a\_at 0.95352 SH3 domain and tetratricopeptide repeats 1 Sh3tc1  
 1427620\_at 1.00659 p53-associated parkin-like cytoplasmic protein Parc  
 1427621\_at 0.99703 Low density lipoprotein receptor-related protein 2 Lrp2  
 1427622\_at 0.97970 maternal embryonic message 1 Mem1  
 1427623\_at 0.96610 hect (homologous to the E6-AP (UBE3A) carboxyl terminus) domain and  
 RCC1 (CHC1)-like domain (RLD) 2 Herc2  
 1427624\_s\_at 1.01050 interleukin 22 /// interleukin 10-related T cell-derived inducible factor beta  
 Il22 /// Iltifb  
 1427625\_a\_at 0.83161 hect (homologous to the E6-AP (UBE3A) carboxyl terminus) domain and  
 RCC1 (CHC1)-like domain (RLD) 2 Herc2  
 1427626\_at 0.92828 "mucin 5, subtype B, tracheobronchial /// similar to mucin 5, subtype B,  
 tracheobronchial" Muc5b /// LOC640195  
 1427627\_at 1.06744 "Solute carrier family 34 (sodium phosphate), member 1" Slc34a1  
 1427628\_at 0.95925 "T-cell receptor beta, variable 8.2" Tcrb-V8.2  
 1427629\_at 1.17839 "protein tyrosine phosphatase, receptor type, J" Ptpnj  
 1427630\_x\_at 0.93246 CEA-related cell adhesion molecule 1 Ceacam1  
 1427631\_x\_at 0.91513 major urinary protein 3 Mup3  
 1427632\_x\_at 1.04137 decay accelerating factor 2 Daf2  
 1427633\_a\_at 1.02431 pregnancy-associated plasma protein A Pappa  
 1427634\_at 1.01431 "potassium voltage-gated channel, subfamily H (eag-related), member 7" Kcnh7  
 1427635\_at 1.01081 kinesin family member 5C Kif5c  
 1427636\_at 0.95418 "testis specific protein-Y encoded, pseudogene" Tspy-ps  
 1427637\_a\_at 0.83789 desmocollin 3 Dsc3  
 1427638\_at 0.98946 zinc finger and BTB domain containing 16 Zbtb16  
 1427639\_a\_at 1.06231 NIMA (never in mitosis gene a)-related expressed kinase 4 Nek4  
 1427640\_a\_at 1.09091 "runt-related transcription factor 1; translocated to, 1 (cyclin D-related)"  
 Runx1t1



1427641\_at 1.02822 Distal-less homeobox 4 Dlx4  
1427642\_at 1.03539 "transient receptor potential cation channel, subfamily M, member 6" Trpm6  
1427643\_at 1.03310 RIKEN cDNA 1200009O22 gene 1200009O22Rik  
1427644\_at 1.05271 "DNA segment, KIST 4" D0Kist4  
1427645\_a\_at 0.94445 interleukin 1 receptor accessory protein-like 2 Il1rapl2  
1427646\_a\_at 0.91471 rho/rac guanine nucleotide exchange factor (GEF) 2 Arhgef2  
1427647\_at 0.97515 cDNA sequence BC022150 BC022150  
1427648\_at 0.83557 Regulator of G-protein signaling 3 Rgs3  
1427649\_at 1.07487 WD repeat domain 22 Wdr22  
1427650\_a\_at 1.16802 runt related transcription factor 1 Runx1  
1427651\_x\_at 2.08011 "histocompatibility 2, D region locus 1" H2-D1  
1427652\_x\_at 0.97569 synaptojanin 2 Synj2  
1427653\_at 0.89376 "T-cell receptor alpha chain /// RIKEN cDNA A430107P09 gene /// gene model  
1220, (NCBI) /// similar to T-cell receptor alpha chain V region CTL-F3 precursor /// similar to T-cell  
receptor alpha chain V region CTL-F3 precursor /// T cell receptor alpha variable 6D-6" Tcra ///  
A430107P09Rik /// Gm1220 /// LOC620297 /// LOC634046 /// Trav6d-6  
1427654\_a\_at 1.08306 5 hydroxytryptamine (serotonin) receptor 4 Htr4  
1427655\_a\_at 0.87001 RIKEN cDNA A630038E17 gene A630038E17Rik  
1427656\_at 0.98698 "T-cell receptor beta, variable 13" Tcrb-V13  
1427657\_at 0.99260 RIKEN cDNA 2310042L06 gene 2310042L06Rik  
1427658\_at 1.05188 "chitobiase, di-N-acetyl-" Ctbs  
1427659\_at 0.89934 "Mus musculus, clone IMAGE:4006890" ---  
1427660\_x\_at 0.87026 "immunoglobulin kappa chain, constant region /// immunoglobulin kappa  
chain variable 28 (V28) /// immunoglobulin kappa chain variable 8 (V8)-16" Igk-C /// Igk-V28 /// Igk-  
V8-16  
1427661\_a\_at 0.98174 tumor-suppressing subchromosomal transferable fragment 4 Tssc4  
1427662\_at 1.01120 Supervillin Svll  
1427663\_a\_at 1.06961 CDC like kinase 4 Clk4  
1427664\_at 0.95358 RIKEN cDNA 4930453N24 gene 4930453N24Rik  
1427665\_a\_at 0.88576 nuclear factor I/C Nfic  
1427666\_a\_at 0.95897 "T-cell receptor beta, joining region" Tcrb-J  
1427667\_s\_at 0.96616 "T-cell receptor beta, joining region" Tcrb-J  
1427668\_at 0.81131 "sialic acid binding Ig-like lectin 1, sialoadhesin" Siglec1  
1427669\_a\_at 1.01317 citron Cit  
1427670\_a\_at 0.98187 transcription factor 12 Tcf12  
1427671\_a\_at 0.89758 formin 1 Fmn1  
1427672\_a\_at 1.00925 "ubiquitously transcribed tetratricopeptide repeat gene, X chromosome" Utx  
1427673\_a\_at 1.00155 "sema domain, immunoglobulin domain (Ig), short basic domain, secreted,  
(semaphorin) 3E" Sema3e  
1427674\_a\_at 0.95619 seizure related gene 6 Sez6  
1427675\_at 1.08266 "vomeronasal 1 receptor, A2" V1ra2  
1427676\_a\_at 0.94318 "glutamate receptor, ionotropic, kainate 1" Grik1  
1427677\_a\_at 0.83906 SRY-box containing gene 6 Sox6

1427678\_at 0.98656 "zinc finger, imprinted 3" Zim3  
 1427679\_at 1.21211 large tumor suppressor Lats1  
 1427680\_a\_at 1.02473 nuclear factor I/B Nfib  
 1427681\_s\_at 0.86231 "vomeronasal 2, receptor, 13" V2r13  
 1427682\_a\_at 0.69791 early growth response 2 Egr2  
 1427683\_at 0.38888 early growth response 2 Egr2  
 1427684\_at 1.11202 zinc finger protein 264 Zfp264  
 1427685\_a\_at 1.26587 synaptojanin 2 Synj2  
 1427686\_at 0.97890 "vomeronasal 2, receptor, 13 /// similar to vomeronasal 2, receptor, 8" V2r13 ///  
 LOC632660  
 1427687\_at 1.06918 protocadherin alpha 10 Pcdha10  
 1427688\_a\_at 0.72675 "protein tyrosine phosphatase, receptor type, S" Ptpns  
 1427689\_a\_at 1.18680 TNFAIP3 interacting protein 1 Tnip1  
 1427690\_a\_at 0.87364 transmembrane phosphatase with tensin homology Tpte  
 1427691\_a\_at 1.23862 interferon (alpha and beta) receptor 2 Ifnar2  
 1427692\_a\_at 0.95680 calcium/calmodulin-dependent serine protein kinase (MAGUK family)  
 Cask  
 1427693\_at 0.92558 "inositol 1,4,5-triphosphate receptor 2" Itpr2  
 1427694\_at 0.89483 gonadotropin releasing hormone receptor Gnhr  
 1427695\_a\_at 1.07216 "POU domain, class 2, transcription factor 1" Pou2f1  
 1427696\_at 1.02927 ferrochelatase Fech  
 1427697\_a\_at 0.85999 transformation related protein 73 Trp73  
 1427698\_at 1.07693 breast cancer 1 Brca1  
 1427699\_a\_at 1.16063 "protein tyrosine phosphatase, non-receptor type 11" Ptpn11  
 1427700\_x\_at 0.86590 keratin 6A Krt6a  
 1427701\_a\_at 1.19544 sine oculis-related homeobox 4 homolog (Drosophila) Six4  
 1427702\_at 1.11551 zinc finger protein 1 Zfp1  
 1427703\_at 1.14308 "platelet-activating factor acetylhydrolase, isoform 1b, beta1 subunit" Pafah1b1  
 1427704\_a\_at 1.01736 galanin receptor 1 Galr1  
 1427705\_a\_at 1.04553 "nuclear factor of kappa light chain gene enhancer in B-cells 1, p105" Nfkb1  
 1427706\_a\_at 1.05651 "sialic acid binding Ig-like lectin 1, sialoadhesin" Siglec1  
 1427707\_a\_at 1.10034 --- ---  
 1427708\_a\_at 0.97289 neurofibromatosis 2 Nf2  
 1427709\_at 1.08661 "glutamate receptor, ionotropic, kainate 3" Grik3  
 1427710\_at 1.07966 cDNA sequence BC013491 BC013491  
 1427711\_a\_at 1.04969 CEA-related cell adhesion molecule 1 Ceacam1  
 1427712\_at 0.96371 CEA-related cell adhesion molecule 1 Ceacam1  
 1427713\_x\_at 0.90500 "POU domain, class 2, transcription factor 2" Pou2f2  
 1427714\_at 0.89800 SET and MYND domain containing 1 Smyd1  
 1427715\_a\_at 1.09962 "5'-nucleotidase, cytosolic IB" Nt5c1b  
 1427716\_at 1.00531 RIKEN cDNA 1700036D21 gene 1700036D21Rik  
 1427717\_at 1.11007 CD80 antigen Cd80  
 1427718\_a\_at 1.09400 transformed mouse 3T3 cell double minute 2 Mdm2

1427719\_s\_at 0.96483 "keratin complex 2, basic, pseudogene 1 /// keratin 82" Krt2-ps1 /// Krt82  
1427720\_a\_at 0.99822 novel nuclear protein 1 Nnp1  
1427721\_at 1.00953 --- ---  
1427722\_at 0.94546 RIKEN cDNA 9830102E05 gene 9830102E05Rik  
1427723\_at 0.87149 growth differentiation factor 11 Gdf11  
1427724\_at 1.08808 topoisomerase (DNA) II alpha Top2a  
1427725\_a\_at 0.91020 "POU domain, class 2, transcription factor 2" Pou2f2  
1427726\_at 0.99553 "similar to histocompatibility 2, T region locus 3" LOC633417  
1427727\_x\_at 0.96109 pregnancy specific glycoprotein 19 Psg19  
1427728\_at 0.95159 "cholinergic receptor, nicotinic, gamma polypeptide" Chrng  
1427729\_at 1.17533 EH-domain containing 2 Ehd2  
1427730\_a\_at 0.85948 zinc finger protein 148 Zfp148  
1427731\_at 1.13179 gonadotropin releasing hormone receptor Gnhr  
1427732\_s\_at 0.89432 "ATP-binding cassette, sub-family G (WHITE), member 4" Abcg4  
1427733\_a\_at 0.96003 nuclear factor I/A Nfia  
1427734\_a\_at 1.19876 Down syndrome cell adhesion molecule-like 1 Dscaml1  
1427735\_a\_at 0.95128 "actin, alpha 1, skeletal muscle" Acta1  
1427736\_a\_at 0.99970 chemokine (C-C motif) receptor-like 2 Ccr12  
1427737\_a\_at 0.97307 RIKEN cDNA 1200011M11 gene 1200011M11Rik  
1427738\_at 1.14195 "DNA segment, KIST 2" D0Kist2  
1427739\_a\_at 1.08750 transformation related protein 53 Trp53  
1427740\_a\_at 1.10688 Strain C3H/HeN mRNA preferentially expressed in LPS-normoresponsive  
macrophages ---  
1427741\_x\_at 0.96749 "NK2 transcription factor related, locus 3 (Drosophila)" Nkx2-3  
1427742\_a\_at 1.05889 Kruppel-like factor 6 Klf6  
1427743\_at 1.14061 "Gene model 672, (NCBI)" Gm672  
1427744\_at 0.97640 cyclin B3 Ccnb3  
1427745\_x\_at 0.82340 proline rich protein MP4 /// similar to proline rich protein MP4 /// cDNA  
sequence BC061494 /// proline-rich protein BstNI subfamily 1 /// similar to proline rich protein MP4 ///  
similar to proline rich protein MP4 MP4 /// MGC78233 /// BC061494 /// Prb1 /// LOC667929 ///  
LOC674323  
1427746\_x\_at 1.28425 "histocompatibility 2, K1, K region" H2-K1  
1427747\_a\_at 37.64685 lipocalin 2 Lcn2  
1427748\_at 1.19405 Immunoglobulin kappa chain variable 1 (V1) Igk-V1  
1427749\_at 1.15964 hypothetical protein LOC620893 LOC620893  
1427750\_at 1.03726 Immunoglobulin kappa chain variable 1 (V1) Igk-V1  
1427751\_a\_at 0.91775 keratin 36 Krt36  
1427752\_a\_at 0.99115 "T-cell receptor beta, variable 13 /// similar to T-cell receptor beta chain V  
region PHDS203 precursor /// similar to T-cell receptor beta chain V region PHDS203 precursor ///  
similar to T-cell receptor beta chain V region PHDS203 precursor /// similar to T-cell receptor beta  
chain V region PHDS203 precursor" Tcrb-V13 /// LOC665446 /// LOC669809 /// LOC674045 ///  
LOC676754  
1427753\_at 0.97326 Immunoglobulin light chain variable region Igv1-135

1427754\_a\_at 0.93075 dynamin 1 Dnm1  
 1427755\_at 1.03498 "mast cell protease, pseudogene 1" Mcpt-ps1  
 1427756\_x\_at 0.97926 immunoglobulin heavy chain 4 (serum IgG1) Igh-4  
 1427757\_at 0.88129 immunoglobulin kappa chain variable 21 (V21) Igh-V21  
 1427758\_x\_at 0.87486 immunoglobulin heavy chain 4 (serum IgG1) /// immunoglobulin heavy chain 6 (heavy chain of IgM) /// immunoglobulin heavy chain (V7183 family) /// immunoglobulin heavy chain (J558 family) /// immunoglobulin heavy chain (S107 family) /// immunoglobulin heavy chain 1a (serum IgG2a) /// Immunoglobulin heavy chain (gamma polypeptide) /// expressed sequence AI324046 /// similar to immunoglobulin mu-chain /// similar to Ig heavy chain V region M315 precursor /// similar to Ig heavy chain V region M315 precursor Igh-4 /// Igh-6 /// Igh-V7183 /// Igh-VJ558 /// Igh-VS107 /// Igh-1a /// Ighg /// AI324046 /// LOC544903 /// LOC633674 /// LOC641025 /// LOC676462  
 1427759\_a\_at 0.99248 ADP-ribosyltransferase 5 Art5  
 1427760\_s\_at 1.15699 "proliferin /// proliferin 2 /// mitogen regulated protein, proliferin 3" Plf /// Plf2 /// Mrpplf3  
 1427761\_at 0.97210 prion protein interacting protein 1 Prnpi1  
 1427762\_x\_at 1.04034 "histone 1, H2bp" Hist1h2bp  
 1427763\_a\_at 1.16165 "calcium/calmodulin-dependent protein kinase II, delta" Camk2d  
 1427764\_a\_at 0.94560 transcription factor E2a Tcf2a  
 1427765\_a\_at 0.95263 "T-cell receptor beta, variable 13 /// similar to T-cell receptor beta chain V region CTL-L17 precursor /// similar to T-cell receptor beta chain V region CTL-L17 precursor" Tcrb-V13 /// LOC384373 /// LOC669782  
 1427766\_at 1.07715 "T-cell receptor alpha, variable 8" Tcra-V8  
 1427767\_a\_at 0.93832 cystic fibrosis transmembrane conductance regulator homolog Cftr  
 1427768\_s\_at 0.94783 "myosin, light polypeptide 3" Myl3  
 1427769\_x\_at 0.89198 "myosin, light polypeptide 3" Myl3  
 1427770\_a\_at 0.99658 "solute carrier family 2 (facilitated glucose transporter), member 3" Slc2a3  
 1427771\_x\_at 1.05773 integrin beta 1 (fibronectin receptor beta) Itgb1  
 1427772\_at 0.97886 defensin beta 15 Defb15  
 1427773\_a\_at 0.93163 Rab acceptor 1 (prenylated) Rabac1  
 1427774\_at 1.00547 defensin beta 7 Defb7  
 1427775\_at 0.96185 defensin beta 10 Defb10  
 1427776\_a\_at 0.97807 fibroblast growth factor receptor 4 Fgfr4  
 1427777\_x\_at 1.00142 fibroblast growth factor receptor 4 Fgfr4  
 1427778\_at 0.89932 defensin beta 8 Defb8  
 1427779\_a\_at 1.07621 CD4 antigen Cd4  
 1427780\_at 0.97821 defensin beta 35 Defb35  
 1427781\_at 1.00852 upregulated during skeletal muscle growth 2 Usmg2  
 1427782\_a\_at 0.93678 corticotropin releasing hormone receptor 1 Crhr1  
 1427783\_at 0.94669 v-erb-a erythroblastic leukemia viral oncogene homolog 4 (avian) Erbb4  
 1427784\_at 0.90364 defensin beta 13 Defb13  
 1427785\_x\_at 0.98118 Small optic lobes homolog (Drosophila) Solh  
 1427786\_at 0.89289 trans-acting transcription factor 6 Sp6

1427787\_at 0.99410 trans-acting transcription factor 6 Sp6  
 1427788\_at 1.14019 neuroendocrine secretory protein antisense Nespas  
 1427789\_s\_at 0.95469 "GNAS (guanine nucleotide binding protein, alpha stimulating) complex locus" Gnas  
 1427790\_at 0.83081 MAP kinase-activated protein kinase 5 /// a disintegrin and metallopeptidase domain 1a Mapkapk5 /// Adam1a  
 1427791\_a\_at 1.00197 a disintegrin and metallopeptidase domain 1a Adam1a  
 1427792\_at 0.90935 Similar to immunoglobulin light chain variable region LOC384413  
 1427793\_at 0.89973 "hypothetical protein, P4(21)n gene" AJ242955  
 1427794\_at 0.87934 "hypothetical protein, P4(21)n gene" AJ242955  
 1427795\_s\_at 1.02491 "Mus musculus, clone IMAGE:5068294" ---  
 1427796\_at 1.11332 zinc finger protein 133 Zfp133  
 1427797\_s\_at 0.99898 cathepsin E /// similar to melanoma antigen /// hypothetical protein LOC670510 /// similar to melanoma antigen Ctse /// LOC622147 /// LOC665955 /// LOC666402 /// LOC667328 /// LOC667538 /// LOC668269 /// LOC668639 /// LOC668769 /// LOC668842 /// LOC669176 /// LOC669407 /// LOC669658 /// LOC669821 /// LOC670510 /// LOC671134  
 1427798\_x\_at 1.04496 "Envelope protein, mRNA sequence" ---  
 1427799\_x\_at 0.99404 immunoglobulin kappa chain variable 28 (V28) /// immunoglobulin kappa chain variable 8 (V8) /// immunoglobulin kappa chain /// immunoglobulin kappa chain variable 19 (V19)-14 /// immunoglobulin kappa chain variable 21 (V21) Igc-V28 /// Igc-V8 /// LOC545854 /// Igc-V19-14 /// Igc-V21  
 1427800\_at 0.94325 keratin associated protein 16-2 Krtap16-2  
 1427801\_at 0.98516 keratin associated protein 16-2 Krtap16-2  
 1427802\_a\_at 1.00669 T-cell receptor gamma chain Tcrg  
 1427803\_at 1.00524 --- ---  
 1427804\_at 0.90527 --- ---  
 1427805\_at 0.98987 --- ---  
 1427806\_at 1.07590 --- ---  
 1427807\_at 0.87797 hypothetical protein LOC676582 LOC676582  
 1427808\_at 0.83351 nuclear transcription factor-Y alpha Nfya  
 1427809\_at 0.98172 Latrophilin 3 Lphn3  
 1427810\_at 1.00662 thymidylate synthase Tyms  
 1427811\_at 0.98002 thymidylate synthase Tyms  
 1427812\_at 0.95547 iduronate 2-sulfatase Ids  
 1427813\_at 0.98753 iduronate 2-sulfatase Ids  
 1427814\_at 1.02336 oncofetal antigen Ofa  
 1427815\_at 1.01922 --- ---  
 1427816\_at 0.96078 "splicing factor, arginine/serine-rich 2 (SC-35)" Sfrs2  
 1427817\_at 1.08949 hypothetical protein LOC641050 LOC641050

|              |         |                                                                                                    |                      |
|--------------|---------|----------------------------------------------------------------------------------------------------|----------------------|
| 1427818_at   | 1.21536 | B-cell leukemia/lymphoma 2                                                                         | Bcl2                 |
| 1427819_at   | 0.93698 | ---                                                                                                | ---                  |
| 1427820_at   | 1.03561 | ---                                                                                                | ---                  |
| 1427821_at   | 1.05296 | "coatomer protein complex, subunit gamma 2, antisense 2"                                           | Copg2as2             |
| 1427822_a_at | 0.90453 | "coatomer protein complex, subunit gamma 2, antisense 2"                                           | Copg2as2             |
| 1427823_at   | 0.95191 | ---                                                                                                | ---                  |
| 1427824_at   | 1.01948 | ---                                                                                                | ---                  |
| 1427825_at   | 0.94083 | ---                                                                                                | ---                  |
| 1427826_a_at | 1.10557 | "solute carrier organic anion transporter family, member 1b2"                                      | Slco1b2              |
| 1427827_at   | 0.95093 | Murine retrovirus readthrough RNA sequence                                                         | ---                  |
| 1427828_at   | 0.83177 | Murine retrovirus readthrough RNA sequence                                                         | ---                  |
| 1427829_at   | 0.92503 | "ATP-binding cassette, sub-family D (ALD), member 4"                                               | Abcd4                |
| 1427830_at   | 0.80431 | zinc finger protein 260                                                                            | Zfp260               |
| 1427831_s_at | 0.78219 | zinc finger protein 260 /// similar to Zinc finger protein OZF (Zinc finger protein 260) (Zfp-260) | Zfp260 /// LOC635007 |
| 1427832_at   | 0.93809 | "tubulin alpha, related sequence 1"                                                                | Tuba-rs1             |
| 1427833_at   | 0.96744 | serine protease inhibitor 16                                                                       | Spi16                |
| 1427834_at   | 0.90691 | serine protease inhibitor 16                                                                       | Spi16                |
| 1427835_at   | 0.96768 | "POU domain, class 2, transcription factor 1"                                                      | Pou2f1               |
| 1427836_at   | 0.93542 | stretch responsive protein 278                                                                     | Sr278                |
| 1427837_at   | 0.98934 | Immunoglobulin kappa chain variable 32 (V32)                                                       | Igk-V32              |
| 1427838_at   | 0.93681 | "tubulin, beta 2a"                                                                                 | Tubb2a               |
| 1427839_at   | 0.96432 | Immunoglobulin heavy chain (J558 family)                                                           | Igh-VJ558            |
| 1427840_at   | 0.99831 | ---                                                                                                | ---                  |
| 1427841_at   | 0.95389 | keratin 14 /// keratin 17                                                                          | Krt14 /// Krt17      |
| 1427842_at   | 0.88335 | keratin associated protein 6-3                                                                     | Krtap6-3             |
| 1427843_at   | 0.95799 | expressed sequence AI840826                                                                        | AI840826             |
| 1427844_a_at | 0.97233 | "CCAAT/enhancer binding protein (C/EBP), beta"                                                     | Cebpb                |
| 1427845_at   | 0.95790 | fibroblast growth factor receptor 4                                                                | Fgfr4                |
| 1427846_x_at | 0.96858 | fibroblast growth factor receptor 4                                                                | Fgfr4                |
| 1427847_at   | 0.94258 | runt related transcription factor 1                                                                | Runx1                |
| 1427848_at   | 0.99672 | "T-cell receptor beta, variable 13"                                                                | Tcrb-V13             |
| 1427849_a_at | 0.87706 | "T-cell receptor beta, variable 13"                                                                | Tcrb-V13             |
| 1427850_x_at | 0.96421 | immunoglobulin heavy chain (J558 family)                                                           | Igh-VJ558            |
| 1427851_x_at | 0.94438 | immunoglobulin heavy chain (J558 family)                                                           | Igh-VJ558            |
| 1427852_x_at | 0.84321 | immunoglobulin heavy chain (J558 family)                                                           | Igh-VJ558            |
| 1427853_a_at | 0.82062 | heat shock protein 1                                                                               | Hspb1                |
| 1427854_x_at | 0.72501 | heat shock protein 1                                                                               | Hspb1                |
| 1427855_at   | 0.83636 | ---                                                                                                | ---                  |
| 1427856_a_at | 0.93291 | Immunoglobulin kappa chain complex                                                                 | ---                  |
| 1427857_x_at | 1.10637 | "Ig kappa chain V-region mRNA, partial cds, clone 2F2"                                             | ---                  |
| 1427858_at   | 1.04620 | Immunoglobulin kappa chain variable 1 (V1)                                                         | Igk-V1               |
| 1427859_at   | 1.00059 | Immunoglobulin kappa chain complex                                                                 | ---                  |

1427860\_at 1.03805 immunoglobulin kappa chain variable 6-23 /// immunoglobulin kappa chain  
 variable 19 (V19)-14 /// immunoglobulin kappa chain variable 19 (V19)-13 /// similar to Ig kappa chain  
 V-V region MPC11 precursor /// similar to Ig kappa chain V-V region MPC11 precursor /// similar to Ig  
 kappa chain V-V region MPC11 precursor /// similar to Ig kappa chain V-V region MPC11 precursor ///  
 similar to Ig kappa chain V-V region MPC11 precursor Igkv6-23 /// Igk-V19-14 /// Igk-V19-13 ///  
 LOC669053 /// LOC669070 /// LOC676136 /// LOC676162 /// LOC676175  
 1427861\_at 1.06725 ADP-ribosylation factor-like 6 interacting protein 3 Arl6ip3  
 1427862\_at 1.08001 ADP-ribosylation factor-like 6 interacting protein 3 Arl6ip3  
 1427863\_at 0.98447 "histone1, H3d" Hist1h3d  
 1427864\_at 1.09334 "histone 2, H3c1 /// histone1, H3d /// histone 1, H3b /// histone 1, H3e /// histone  
 2, H3b" Hist2h3c1 /// Hist1h3d /// Hist1h3b /// Hist1h3e /// Hist2h3b  
 1427865\_at 1.00264 --- ---  
 1427866\_x\_at 0.89434 "hemoglobin, beta adult major chain" Hbb-b1  
 1427867\_at 0.96078 "Myosin, heavy polypeptide 1, skeletal muscle, adult" Myh1  
 1427868\_x\_at 0.99871 "myosin, heavy polypeptide 1, skeletal muscle, adult" Myh1  
 1427869\_at 0.96502 immunoglobulin heavy chain 4 (serum IgG1) Igh-4  
 1427870\_x\_at 0.99742 immunoglobulin heavy chain 4 (serum IgG1) Igh-4  
 1427871\_at 0.89330 platelet-activating factor receptor Ptafr  
 1427872\_at 0.88983 platelet-activating factor receptor Ptafr  
 1427873\_at 0.94728 defensin related cryptdin 15 Defcr15  
 1427874\_at 0.89039 zinc finger protein 313 Zfp313  
 1427875\_a\_at 1.07898 RIKEN cDNA 1100001I22 gene 1100001I22Rik  
 1427876\_at 1.07583 RIKEN cDNA 2610312B22 gene 2610312B22Rik  
 1427877\_at 0.97671 RIKEN cDNA 2610312B22 gene 2610312B22Rik  
 1427878\_at 0.99388 RIKEN cDNA 0610010O12 gene 0610010O12Rik  
 1427879\_at 0.93774 RIKEN cDNA 1810031K17 gene 1810031K17Rik  
 1427880\_at 1.02851 "ubiquinol-cytochrome c reductase, complex III subunit VII" Uqcrq  
 1427881\_at 1.06217 "deoxynucleotidyltransferase, terminal, interacting protein 2" Dnttip2  
 1427882\_at 1.07078 "deoxynucleotidyltransferase, terminal, interacting protein 2" Dnttip2  
 1427883\_a\_at 0.84851 "procollagen, type III, alpha 1" Col3a1  
 1427884\_at 1.06664 "procollagen, type III, alpha 1" Col3a1  
 1427885\_at 0.93994 "polymerase (DNA-directed), delta 4" Pold4  
 1427886\_at 0.96162 nuclear pore membrane protein 121 Pom121  
 1427887\_at 1.03988 RIKEN cDNA 2610304G08 gene 2610304G08Rik  
 1427888\_a\_at 0.92627 "spectrin alpha 2 /// similar to Spectrin alpha chain, brain (Spectrin, non-  
 erythroid alpha chain) (Alpha-II spectrin) (Fodrin alpha chain)" Spna2 /// LOC381358  
 1427889\_at 0.93659 "spectrin alpha 2 /// similar to Spectrin alpha chain, brain (Spectrin, non-  
 erythroid alpha chain) (Alpha-II spectrin) (Fodrin alpha chain)" Spna2 /// LOC381358  
 1427890\_a\_at 0.89987 leucine rich repeat containing 56 Lrrc56  
 1427891\_at 0.98616 "GTPase, IMAP family member 6" Gimap6  
 1427892\_at 1.13768 myosin IG Myo1g  
 1427893\_a\_at 1.41999 phosphomevalonate kinase Pmvk  
 1427894\_at 0.79656 vasorin Vasn

|              |         |                                                                                                                                                                                                                                              |      |                     |
|--------------|---------|----------------------------------------------------------------------------------------------------------------------------------------------------------------------------------------------------------------------------------------------|------|---------------------|
| 1427895_at   | 0.96084 | RIKEN cDNA 2310004N24                                                                                                                                                                                                                        | gene | 2310004N24Rik       |
| 1427896_at   | 0.90018 | RIKEN cDNA 2400003N08                                                                                                                                                                                                                        | gene | 2400003N08Rik       |
| 1427897_s_at | 0.84126 | RIKEN cDNA 2400003N08                                                                                                                                                                                                                        | gene | 2400003N08Rik       |
| 1427898_at   | 1.05450 | ring finger protein (C3H2C3 type) 6                                                                                                                                                                                                          |      | Rnf6                |
| 1427899_at   | 0.97426 | ring finger protein (C3H2C3 type) 6                                                                                                                                                                                                          |      | Rnf6                |
| 1427900_at   | 1.15251 | phosphatidylinositol-4-phosphate 5-kinase-like 1                                                                                                                                                                                             |      | Pip5k1l             |
| 1427901_at   | 1.09679 | mitochondrial ribosomal protein S18C                                                                                                                                                                                                         |      | Mrps18c             |
| 1427902_at   | 1.32502 | serine/arginine repetitive matrix 2                                                                                                                                                                                                          |      | Srrm2               |
| 1427903_at   | 1.07067 | phosphohistidine phosphatase 1                                                                                                                                                                                                               |      | Phpt1               |
| 1427904_s_at | 1.01787 | RIKEN cDNA 2410091C18                                                                                                                                                                                                                        | gene | 2410091C18Rik       |
| 1427905_at   | 1.11495 | RIKEN cDNA 1810063B07                                                                                                                                                                                                                        | gene | 1810063B07Rik       |
| 1427906_at   | 1.01277 | RIKEN cDNA 1110037F02                                                                                                                                                                                                                        | gene | 1110037F02Rik       |
| 1427907_at   | 1.03626 | RIKEN cDNA 1110037F02                                                                                                                                                                                                                        | gene | 1110037F02Rik       |
| 1427908_at   | 1.12341 | "BCL2/adenovirus E1B interacting protein 1, NIP1"                                                                                                                                                                                            |      | Bnip1               |
| 1427909_at   | 1.02959 | RIKEN cDNA 2410015M20                                                                                                                                                                                                                        | gene | 2410015M20Rik       |
| 1427910_at   | 1.07365 | cystatin E/M                                                                                                                                                                                                                                 |      | Cst6                |
| 1427911_at   | 1.04865 | RIKEN cDNA 2610307O08                                                                                                                                                                                                                        | gene | 2610307O08Rik       |
| 1427912_at   | 1.13759 | carbonyl reductase 3                                                                                                                                                                                                                         |      | Cbr3                |
| 1427913_at   | 1.04063 | RWD domain containing 1                                                                                                                                                                                                                      |      | Rwdd1               |
| 1427914_a_at | 1.04378 | "transcription elongation factor B (SIII), polypeptide 1"                                                                                                                                                                                    |      | Tceb1               |
| 1427915_s_at | 0.91656 | "transcription elongation factor B (SIII), polypeptide 1"                                                                                                                                                                                    |      | Tceb1               |
| 1427916_at   | 0.78519 | suppression of tumorigenicity 7-like                                                                                                                                                                                                         |      | St7l                |
| 1427917_s_at | 0.89785 | single-stranded DNA binding protein 3                                                                                                                                                                                                        |      | Ssbp3               |
| 1427918_a_at | 0.94442 | "ras homolog gene family, member Q"                                                                                                                                                                                                          |      | Rhoq                |
| 1427919_at   | 1.01646 | "sushi-repeat-containing protein, X-linked 2"                                                                                                                                                                                                |      | SrpX2               |
| 1427920_at   | 1.00924 | PHD finger protein 19                                                                                                                                                                                                                        |      | Phf19               |
| 1427921_s_at | 0.95488 | RIKEN cDNA 2310061C15                                                                                                                                                                                                                        | gene | 2310061C15Rik       |
| 1427922_at   | 0.88298 | RIKEN cDNA 2310061C15                                                                                                                                                                                                                        | gene | 2310061C15Rik       |
| 1427923_at   | 0.91989 | "zinc metalloproteinase, STE24 homolog (S. cerevisiae)"                                                                                                                                                                                      |      | Zmpste24            |
| 1427924_at   | 0.94876 | syntaxin 17                                                                                                                                                                                                                                  |      | Stx17               |
| 1427925_at   | 1.11764 | syntaxin 17                                                                                                                                                                                                                                  |      | Stx17               |
| 1427926_at   | 1.09803 | mastermind like 2 (Drosophila) /// similar to mastermind-like 2; mastermind (Drosophila)-like 2                                                                                                                                              |      | Maml2 /// LOC434369 |
| 1427927_at   | 0.97750 | expressed sequence AW049829                                                                                                                                                                                                                  |      | AW049829            |
| 1427928_s_at | 0.90893 | CDC91 cell division cycle 91-like 1 (S. cerevisiae)                                                                                                                                                                                          |      | Cdc91l1             |
| 1427929_a_at | 0.90409 | "pyridoxal (pyridoxine, vitamin B6) kinase"                                                                                                                                                                                                  |      | Pdxk                |
| 1427930_at   | 1.05920 | "pyridoxal (pyridoxine, vitamin B6) kinase"                                                                                                                                                                                                  |      | Pdxk                |
| 1427931_s_at | 1.09876 | "pyridoxal (pyridoxine, vitamin B6) kinase"                                                                                                                                                                                                  |      | Pdxk                |
| 1427932_s_at | 1.34453 | RIKEN cDNA 1200003I10 gene /// RIKEN cDNA 1200015M12 gene /// RIKEN cDNA 1200016E24 gene /// RIKEN cDNA A130040M12 gene /// RIKEN cDNA E430024C06 gene 1200003I10Rik /// 1200015M12Rik /// 1200016E24Rik /// A130040M12Rik /// E430024C06Rik |      |                     |
| 1427933_at   | 1.02004 | vacuolar protein sorting 33B (yeast)                                                                                                                                                                                                         |      | Vps33b              |
| 1427934_at   | 0.97370 | RIKEN cDNA 2610208E05                                                                                                                                                                                                                        | gene | 2610208E05Rik       |



1427935\_at 1.03944 RIKEN cDNA 2610208E05 gene 2610208E05Rik  
1427936\_at 0.91253 threonine synthase-like 1 (bacterial) Thns11  
1427937\_at 1.01553 RIKEN cDNA 2610030H06 gene 2610030H06Rik  
1427938\_at 0.83273 c-myc binding protein Mycbp  
1427939\_s\_at 0.84245 c-myc binding protein Mycbp  
1427940\_s\_at 0.89069 c-myc binding protein Mycbp  
1427941\_at 1.08184 "Dicer1, Dcr-1 homolog (Drosophila)" Dicer1  
1427942\_at 0.78703 peptidylglycine alpha-amidating monooxygenase COOH-terminal interactor  
Pamci  
1427943\_at 0.98724 "acylphosphatase 2, muscle type" Acyp2  
1427944\_at 0.90906 C1q domain containing 1 C1qdc1  
1427945\_at 1.01151 dihydropyrimidine dehydrogenase Dpyd  
1427946\_s\_at 0.99757 dihydropyrimidine dehydrogenase Dpyd  
1427947\_at 1.09559 cDNA sequence BC028440 BC028440  
1427948\_a\_at 1.00895 zinc finger protein 99 Zfp99  
1427949\_at 1.04790 zinc finger protein 294 Zfp294  
1427950\_at 1.02044 zinc finger protein 294 Zfp294  
1427951\_s\_at 0.83722 coiled-coil domain containing 28A Ccdc28a  
1427952\_at 0.94590 aryl hydrocarbon receptor-interacting protein-like 1 Aipl1  
1427953\_at 0.95229 cDNA sequence BC025462 BC025462  
1427954\_at 1.04483 cDNA sequence BC048403 BC048403  
1427955\_a\_at 0.85929 differentially expressed in B16F10 1 Deb1  
1427956\_at 1.11259 polycomb group ring finger 1 Pcgf1  
1427957\_at 1.03613 RIKEN cDNA 9530008L14 gene 9530008L14Rik  
1427958\_at 0.83300 abhydrolase domain containing 10 Abhd10  
1427959\_at 0.99326 abhydrolase domain containing 10 Abhd10  
1427960\_at 0.72341 "UDP glucuronosyltransferase 2 family, polypeptide B34" Ugt2b34  
1427961\_s\_at 0.68199 "UDP glucuronosyltransferase 2 family, polypeptide B34" Ugt2b34  
1427962\_at 0.89988 coiled-coil domain containing 102A /// similar to CG31638-PA Ccdc102a ///  
LOC672218  
1427963\_s\_at 1.02495 retinol dehydrogenase 9 Rdh9  
1427964\_at 0.79395 CKLF-like MARVEL transmembrane domain containing 8 Cmtm8  
1427965\_at 1.06773 single-stranded DNA binding protein 1 Ssbp1  
1427966\_at 0.92110 cDNA sequence BC087945 BC087945  
1427967\_at 0.88526 SLIT-ROBO Rho GTPase activating protein 2 Srgap2  
1427968\_at 0.92524 TGIF homeobox 1 Tgifx1  
1427969\_s\_at 1.08518 zinc finger protein 654 Zfp654  
1427970\_at 0.94959 zinc finger protein 689 Zfp689  
1427971\_at 0.99325 "Vcell division cycle 73, Paf1/RNA polymerase II complex component,  
homolog (S. cerevisiae)" Cdc73  
1427972\_at 0.90869 "Vcell division cycle 73, Paf1/RNA polymerase II complex component,  
homolog (S. cerevisiae)" Cdc73  
1427973\_s\_at 1.01914 "Vcell division cycle 73, Paf1/RNA polymerase II complex component,

homolog (*S. cerevisiae*)" Cdc73

1427974\_s\_at 0.97406 "calcium channel, voltage-dependent, L type, alpha 1D subunit" Cacna1d

1427975\_at 0.73926 RIKEN cDNA 2210403B10 gene 2210403B10Rik

1427976\_at 0.89686 oogenesisin 1 Oog1

1427977\_x\_at 1.07387 oogenesisin 1 Oog1

1427978\_at 1.08563 RIKEN cDNA 4732418C07 gene 4732418C07Rik

1427979\_at 0.99902 RIKEN cDNA 4732418C07 gene 4732418C07Rik

1427980\_at 0.90311 RIKEN cDNA 4933407C03 gene 4933407C03Rik

1427981\_a\_at 0.86712 cysteine sulfinic acid decarboxylase Csad

1427982\_s\_at 1.01907 synaptic nuclear envelope 2 Syne2

1427983\_at 1.33185 suppressor of hairy wing homolog 3 (*Drosophila*) Suhw3

1427984\_at 1.02356 SUMO/sentrin specific peptidase 6 Senp6

1427985\_at 0.83650 RIKEN cDNA 9630042H07 gene 9630042H07Rik

1427986\_a\_at 0.88029 "procollagen, type XVI, alpha 1" Col16a1

1427987\_at 1.15235 scaffold attachment factor B2 Safb2

1427988\_s\_at 1.13170 scaffold attachment factor B2 Safb2

1427989\_at 0.93064 anti-Mullerian hormone type 2 receptor Amhr2

1427990\_at 0.98901 ubiquitin specific peptidase 45 Usp45

1427991\_s\_at 0.92007 ubiquitin specific peptidase 45 Usp45

1427992\_a\_at 1.00957 "RAB12, member RAS oncogene family" Rab12

1427993\_at 0.84520 RUN and FYVE domain-containing 2 Rufy2

1427994\_at 0.83236 CD300 antigen like family member F Cd300lf

1427995\_at 0.98577 carboxypeptidase A5 Cpa5

1427996\_at 0.97224 cDNA sequence BC028528 BC028528

1427997\_at 1.09162 RIKEN cDNA 1110007M04 gene 1110007M04Rik

1427998\_at 0.96775 RIKEN cDNA 2600001B17 gene 2600001B17Rik

1427999\_at 1.05007 "small nuclear RNA activating complex, polypeptide 5" Snapc5

1428000\_at 0.99653 transmembrane protein 60 Tmem60

1428001\_at 1.05228 thyroid stimulating hormone receptor Tshr

1428002\_at 0.97787 serum amyloid A-like 1 Saal1

1428003\_s\_at 0.93372 "thiamine triphosphatase /// zinc finger homeobox 2, antisense" Thtpa /// Zfhx2as

1428004\_at 1.07655 RIKEN cDNA 3300001G02 gene 3300001G02Rik

1428005\_at 0.86220 MOCO sulphurase C-terminal domain containing 1 Moscl1

1428006\_at 0.94854 sec1 family domain containing 1 Scfd1

1428007\_at 0.98643 keratin associated protein 13-1 Krtap13-1

1428008\_at 1.03092 dynamin 1-like Dnm1l

1428009\_a\_at 1.01892 "ATP-binding cassette, sub-family C (CFTR/MRP), member 10" Abcc10

1428010\_at 1.08178 translocase of inner mitochondrial membrane 9 homolog (yeast) Timm9

1428011\_a\_at 0.91292 Erbb2 interacting protein Erbb2ip

1428012\_at 0.98629 "complement component 8, alpha polypeptide" C8a

1428013\_at 1.28507 RIKEN cDNA 6030458C11 gene 6030458C11Rik

1428014\_at 0.95902 "histone 1, H4h" Hist1h4h

1428015\_at 1.18195 "DNA segment, Chr 12, Wayne State University 118, expressed" D12Wsu118e  
1428016\_a\_at 0.96706 Ras interacting protein 1 Rasip1  
1428017\_at 1.08330 Pbx/knotted 1 homeobox 2 Pknox2  
1428018\_a\_at 0.96091 Cd300D antigen Cd300d  
1428019\_at 0.89848 RIKEN cDNA 4932425I24 gene 4932425I24Rik  
1428020\_at 0.88576 brix domain containing 5 Bxdc5  
1428021\_at 0.98973 methylcrotonoyl-Coenzyme A carboxylase 2 (beta) Mccc2  
1428022\_at 0.97635 lipocalin 13 Lcn13  
1428023\_at 1.03727 RIKEN cDNA 3110009E18 gene 3110009E18Rik  
1428024\_at 1.08045 Microtubule-associated protein 1 light chain 3 beta Map1lc3b  
1428025\_s\_at 1.02897 "phosphatidylinositol transfer protein, cytoplasmic 1" Pitpnc1  
1428026\_at 0.87335 teashirt zinc finger family member 2 Tshz2  
1428027\_at 1.18187 "BIC noncoding mRNA, complete sequence" ---  
1428028\_at 0.99836 gene trap insertion site 4-1 Gt4-1  
1428029\_a\_at 0.96101 "H2A histone family, member V" H2afv  
1428030\_at 0.98752 a disintegrin and metallopeptidase domain 34 Adam34  
1428031\_at 0.97660 melanin-concentrating hormone receptor 1 Mchr1  
1428032\_at 0.95654 "activin A receptor, type IC" Acvr1c  
1428033\_at 0.89826 hypothetical protein LOC245174 LOC245174  
1428034\_a\_at 1.53846 "tumor necrosis factor receptor superfamily, member 9" Tnfrsf9  
1428035\_at 1.04789 fibrous sheath-interacting protein 1 Fsip1  
1428036\_at 0.93192 "MRNA similar to phosphatidylinositol glycan, class S (cDNA clone MGC:41618 IMAGE:1265093)" ---  
1428037\_at 0.98026 otoancorin Otoa  
1428038\_at 1.08288 "gene model 568, (NCBI)" Gm568  
1428039\_at 0.95988 RIKEN cDNA 2310040A13 gene 2310040A13Rik  
1428040\_at 0.93971 "one cut domain, family member 3" Onecut3  
1428041\_at 0.99788 RIKEN cDNA 1600002H07 gene 1600002H07Rik  
1428042\_at 0.99908 Similar to RIKEN cDNA B430319H21 gene MGC41410  
1428043\_a\_at 1.04759 cytidine monophospho-N-acetylneuraminic acid hydroxylase Cmah  
1428044\_at 1.09046 "adaptor-related protein complex 3, sigma 2 subunit" Ap3s2  
1428045\_a\_at 0.87426 E74-like factor 2 Elf2  
1428046\_a\_at 0.80730 zinc finger protein X-linked Zfx  
1428047\_s\_at 0.87270 "zinc finger protein, autosomal /// zinc finger protein X-linked" Zfa /// Zfx  
1428048\_at 0.99979 cDNA sequence BC027582 BC027582  
1428049\_a\_at 0.98761 nudix (nucleoside diphosphate linked moiety X)-type motif 16-like 1 Nudt16l1  
1428050\_a\_at 0.96057 transmembrane BAX inhibitor motif containing 4 Tmbim4  
1428051\_a\_at 1.11206 "calcium channel, voltage-dependent, L type, alpha 1D subunit" Cacna1d  
1428052\_a\_at 1.00254 "zinc finger, MYM domain containing 1" Zmym1  
1428053\_at 1.04085 "G protein-coupled receptor, family C, group 6, member A" Gprc6a  
1428054\_at 0.95562 "solute carrier family 8 (sodium/calcium exchanger), member 2" Slc8a2  
1428055\_at 0.93869 RNA imprinted and accumulated in nucleus Rian

|              |         |                                                                     |               |
|--------------|---------|---------------------------------------------------------------------|---------------|
| 1428056_at   | 0.97310 | "Killer cell lectin-like receptor, subfamily A, member 4"           | Klra4         |
| 1428057_a_at | 0.91702 | AHNAK nucleoprotein (desmoyokin)                                    | Ahnak         |
| 1428058_at   | 0.92311 | AHNAK nucleoprotein (desmoyokin)                                    | Ahnak         |
| 1428059_at   | 1.00731 | CD247 antigen                                                       | Cd247         |
| 1428060_at   | 0.89296 | CD247 antigen                                                       | Cd247         |
| 1428061_at   | 1.06475 | histone aminotransferase 1                                          | Hat1          |
| 1428062_at   | 1.12624 | carboxypeptidase A1                                                 | Cpa1          |
| 1428063_at   | 0.88123 | ankyrin repeat domain 46                                            | Ankrd46       |
| 1428064_at   | 1.04319 | "centaurin, delta 2"                                                | Centd2        |
| 1428065_at   | 0.86973 | "solute carrier family 44, member 2"                                | Slc44a2       |
| 1428066_at   | 1.07686 | coiled-coil domain containing 120                                   | Ccdc120       |
| 1428067_at   | 1.02403 | "RAS-like, family 12"                                               | Ras12         |
| 1428068_at   | 1.02427 | sorting and assembly machinery component 50 homolog (S. cerevisiae) | Samm50        |
| 1428069_at   | 1.02622 | cell division cycle associated 7                                    | Cdca7         |
| 1428070_at   | 0.92431 | "synovial apoptosis inhibitor 1, synoviolin"                        | Syvn1         |
| 1428071_at   | 0.94809 | RIKEN cDNA 1110038D17 gene                                          | 1110038D17Rik |
| 1428072_a_at | 0.99714 | dolichyl pyrophosphate phosphatase 1                                | Dolpp1        |
| 1428073_a_at | 1.01708 | nucleoporin 88                                                      | Nup88         |
| 1428074_at   | 1.23537 | transmembrane protein 158                                           | Tmem158       |
| 1428075_at   | 0.92319 | NADH dehydrogenase (ubiquinone) 1 beta subcomplex 4                 | Ndufb4        |
| 1428076_s_at | 0.99370 | NADH dehydrogenase (ubiquinone) 1 beta subcomplex 4                 | Ndufb4        |
| 1428077_at   | 0.87357 | transmembrane protein 163                                           | Tmem163       |
| 1428078_at   | 0.85457 | RIKEN cDNA 0610013E23 gene                                          | 0610013E23Rik |
| 1428079_at   | 0.99049 | "fibrinogen, B beta polypeptide"                                    | Fgb           |
| 1428080_at   | 0.95838 | phosphoglycerate mutase family member 5                             | Pgam5         |
| 1428081_at   | 1.06218 | kelch-like 21 (Drosophila)                                          | Klhl21        |
| 1428082_at   | 1.02764 | acyl-CoA synthetase long-chain family member 5                      | Acsl5         |
| 1428083_at   | 1.89701 | RIKEN cDNA 2310043N10 gene                                          | 2310043N10Rik |
| 1428084_at   | 0.99243 | "KRR1, small subunit (SSU) processome component, homolog (yeast)"   | Krr1          |
| 1428085_at   | 1.03359 | RIKEN cDNA 1110057K04 gene                                          | 1110057K04Rik |
| 1428086_at   | 0.97779 | dynamamin 1-like                                                    | Dnm11         |
| 1428087_at   | 0.95044 | dynamamin 1-like                                                    | Dnm11         |
| 1428088_at   | 0.89616 | RIKEN cDNA 2410002I01 gene                                          | 2410002I01Rik |
| 1428089_at   | 1.01416 | "SLIT and NTRK-like family, member 1"                               | Slitrk1       |
| 1428090_at   | 1.03361 | Pentatricopeptide repeat domain 3                                   | Ptcd3         |
| 1428091_at   | 0.93459 | kelch-like 7 (Drosophila)                                           | Klhl7         |
| 1428092_at   | 1.01656 | cell division cycle 5-like (S. pombe)                               | Cdc51         |
| 1428093_at   | 0.91225 | TraB domain containing                                              | Trabd         |
| 1428094_at   | 0.86681 | lysosomal membrane glycoprotein 2                                   | Lamp2         |
| 1428095_a_at | 0.96406 | transmembrane protein 24                                            | Tmem24        |
| 1428096_at   | 1.10436 | importin 11                                                         | Ipo11         |
| 1428097_at   | 1.16865 | RIKEN cDNA 2510009E07 gene                                          | 2510009E07Rik |

1428098\_a\_at 0.91338 transmembrane 7 superfamily member 3 Tm7sf3  
1428099\_a\_at 1.00616 "splicing factor, arginine/serine-rich 1 (ASF/SF2)" Sfrs1  
1428100\_at 1.07007 "splicing factor, arginine/serine-rich 1 (ASF/SF2)" Sfrs1  
1428101\_at 0.91172 ring finger protein 38 Rnf38  
1428102\_at 0.94624 carboxypeptidase B1 (tissue) Cpb1  
1428103\_at 0.82392 --- ---  
1428104\_at 1.07201 "TPX2, microtubule-associated protein homolog (Xenopus laevis)" Tpx2  
1428105\_at 0.97392 "TPX2, microtubule-associated protein homolog (Xenopus laevis)" Tpx2  
1428106\_at 1.03604 RIKEN cDNA 1300001I01 gene 1300001I01Rik  
1428107\_at 0.84738 SH3-binding domain glutamic acid-rich protein like Sh3bgrl  
1428108\_x\_at 1.03449 transmembrane and coiled-coil domains 2 Tmcc2  
1428109\_at 1.03429 vacuolar protein sorting 11 (yeast) Vps11  
1428110\_x\_at 1.09748 vacuolar protein sorting 11 (yeast) Vps11  
1428111\_at 0.91378 "solute carrier family 38, member 4" Slc38a4  
1428112\_at 1.02728 "arginine-rich, mutated in early stage tumors" Armet  
1428113\_at 0.82000 transmembrane and tetratricopeptide repeat containing 4 Tmtc4  
1428114\_at 0.97225 "solute carrier family 14 (urea transporter), member 1" Slc14a1  
1428115\_a\_at 0.85476 "RAB2B, member RAS oncogene family" Rab2b  
1428116\_a\_at 0.92016 dynein light chain Tctex-type 1 Dynlt1  
1428117\_x\_at 0.79196 G protein-coupled receptor 178 Gpr178  
1428118\_at 0.93059 leucine rich repeat neuronal 6A Lrrn6a  
1428119\_a\_at 1.03201 "RAP2C, member of RAS oncogene family" Rap2c  
1428120\_at 0.95198 F-box and WD-40 domain protein 9 Fbxw9  
1428121\_at 0.96244 RIKEN cDNA 2610528K11 gene 2610528K11Rik  
1428122\_s\_at 0.78206 RIKEN cDNA 2610528K11 gene 2610528K11Rik  
1428123\_at 0.93152 RIKEN cDNA 2610528K11 gene 2610528K11Rik  
1428124\_at 0.97431 "general transcription factor II E, polypeptide 1 (alpha subunit)" Gtf2e1  
1428125\_at 0.82519 RIKEN cDNA 4921506J03 gene 4921506J03Rik  
1428126\_a\_at 0.94431 RIKEN cDNA 4921506J03 gene 4921506J03Rik  
1428127\_at 0.89383 RIKEN cDNA 4921506J03 gene 4921506J03Rik  
1428128\_at 0.91951 RIKEN cDNA 4921506J03 gene 4921506J03Rik  
1428129\_at 0.87781 "lectin, mannose-binding, 1" Lman1  
1428130\_at 0.99462 "lectin, mannose-binding, 1" Lman1  
1428131\_a\_at 0.92024 CDC42 small effector 1 Cdc42se1  
1428132\_at 0.87832 CDC42 small effector 1 Cdc42se1  
1428133\_at 0.99810 Smad nuclear interacting protein 1 Snip1  
1428134\_at 0.79585 coenzyme Q9 homolog (yeast) Coq9  
1428135\_a\_at 1.01282 eukaryotic translation elongation factor 1 delta (guanine nucleotide exchange protein) Eef1d  
1428136\_at 0.96769 secreted frizzled-related sequence protein 1 Sfrp1  
1428137\_at 0.98893 ADP-ribosylation factor-like 8B Arl8b  
1428138\_s\_at 0.98208 ADP-ribosylation factor-like 8B Arl8b  
1428139\_at 1.06669 RIKEN cDNA 4930538D17 gene 4930538D17Rik

1428140\_at 0.93445 3-oxoacid CoA transferase 1 Oxct1  
1428141\_at 0.98709 "golgi associated, gamma adaptin ear containing, ARF binding protein 2" Gga2  
1428142\_at 1.35082 ets variant gene 5 Etv5  
1428143\_a\_at 0.93066 patatin-like phospholipase domain containing 2 Pnpla2  
1428144\_at 0.94206 RIKEN cDNA 1200011O22 gene 1200011O22Rik  
1428145\_at 0.90114 acetyl-Coenzyme A acyltransferase 2 (mitochondrial 3-oxoacyl-Coenzyme A thiolase) Acaa2  
1428146\_s\_at 0.94981 acetyl-Coenzyme A acyltransferase 2 (mitochondrial 3-oxoacyl-Coenzyme A thiolase) Acaa2  
1428147\_at 1.03080 coronin 7 Coro7  
1428148\_s\_at 0.95984 coronin 7 Coro7  
1428149\_at 0.88218 coronin 7 Coro7  
1428150\_at 0.93743 coronin 7 Coro7  
1428151\_x\_at 0.89890 cysteine conjugate-beta lyase 1 Ccb11  
1428152\_a\_at 1.00421 Ribosomal protein L18A Rpl18a  
1428153\_at 1.15488 mitochondrial ribosomal protein S10 Mrps10  
1428154\_s\_at 0.89303 phosphatidic acid phosphatase type 2 domain containing 1 Ppapdc1  
1428155\_at 0.99208 COMM domain containing 9 Commd9  
1428156\_at 0.99384 "guanine nucleotide binding protein (G protein), gamma 2 subunit" Gng2  
1428157\_at 0.98217 "guanine nucleotide binding protein (G protein), gamma 2 subunit" Gng2  
1428158\_at 0.95457 AKT1 substrate 1 (proline-rich) Akt1s1  
1428159\_s\_at 1.01115 "NADH dehydrogenase (ubiquinone) 1, alpha/beta subcomplex, 1" Ndufab1  
1428160\_at 0.75467 "NADH dehydrogenase (ubiquinone) 1, alpha/beta subcomplex, 1" Ndufab1  
1428161\_a\_at 0.96510 coiled-coil-helix-coiled-coil-helix domain containing 2 Chchd2  
1428162\_at 0.93474 RIKEN cDNA 4933421E11 gene 4933421E11Rik  
1428163\_at 1.01335 SAR1 gene homolog B (S. cerevisiae) Sar1b  
1428164\_at 0.96143 nudix (nucleoside diphosphate linked moiety X)-type motif 9 Nudt9  
1428165\_at 0.94542 vacuolar protein sorting 24 (yeast) Vps24  
1428166\_at 1.04004 "congenital dyserythropoietic anemia, type I (human)" Cdan1  
1428167\_a\_at 0.72030 myelin protein zero-like 1 Mpzl1  
1428168\_at 0.95238 myelin protein zero-like 1 Mpzl1  
1428169\_at 0.92448 autophagy-related 16-like 1 (yeast) Atg16l1  
1428170\_at 1.02159 zinc finger protein 180 Zfp180  
1428171\_at 1.11370 PRP39 pre-mRNA processing factor 39 homolog (yeast) Prpf39  
1428172\_at 1.08633 PRP39 pre-mRNA processing factor 39 homolog (yeast) Prpf39  
1428173\_at 1.04177 echinoderm microtubule associated protein like 2 Eml2  
1428174\_x\_at 1.00207 KH-type splicing regulatory protein Khgrp  
1428175\_at 0.90821 transmembrane protein 161B Tmem161b  
1428176\_at 1.06024 "endothelial differentiation, sphingolipid G-protein-coupled receptor, 5" Edg5  
1428177\_at 1.02009 trafficking protein particle complex 6B /// similar to Trafficking protein particle complex subunit 6B Trappc6b /// LOC433458  
1428178\_s\_at 0.95928 trafficking protein particle complex 6B Trappc6b

1428179\_at 1.02813 NADH dehydrogenase (ubiquinone) flavoprotein 2 Ndufv2  
 1428180\_at 1.01258 RIKEN cDNA 2810422J05 gene 2810422J05Rik  
 1428181\_at 1.02348 "electron transferring flavoprotein, beta polypeptide" Etfb  
 1428182\_at 1.02723 phosphoribosyl pyrophosphate synthetase-associated protein 1 Prpsap1  
 1428183\_at 0.92680 ankyrin repeat domain 23 Ankrd23  
 1428184\_at 1.02286 RIKEN cDNA 3110035E14 gene 3110035E14Rik  
 1428185\_at 0.93288 potassium channel tetramerisation domain containing 18 Kctd18  
 1428186\_at 0.87784 potassium channel tetramerisation domain containing 6 Kctd6  
 1428187\_at 1.21323 "CD47 antigen (Rh-related antigen, integrin-associated signal transducer)"  
 Cd47  
 1428188\_at 1.02738 RIKEN cDNA 2610019A05 gene 2610019A05Rik  
 1428189\_at 0.94099 RIKEN cDNA 5730494M16 gene 5730494M16Rik  
 1428190\_at 1.21422 "solute carrier family 25 (mitochondrial carrier, citrate transporter), member  
 1" Slc25a1  
 1428191\_s\_at 0.99731 methyltransferase 11 domain containing 1 Mett11d1  
 1428192\_at 0.93633 kelch repeat and BTB (POZ) domain containing 7 Kbtbd7  
 1428193\_at 1.06004 "ubiquitin specific peptidase 9, X chromosome" Usp9x  
 1428194\_at 0.98259 "ubiquitin specific peptidase 9, X chromosome" Usp9x  
 1428195\_at 0.92388 RIKEN cDNA 4631427C17 gene 4631427C17Rik  
 1428196\_a\_at 0.99189 RIKEN cDNA 1200015F23 gene 1200015F23Rik  
 1428197\_at 0.89288 tetraspanin 9 Tspan9  
 1428198\_at 0.93746 adenosine deaminase-like Adal  
 1428199\_at 0.81879 adenosine deaminase-like Adal  
 1428200\_a\_at 0.84655 RIKEN cDNA 2210010A19 gene 2210010A19Rik  
 1428201\_at 1.02666 RIKEN cDNA 2310036O22 gene 2310036O22Rik  
 1428202\_at 0.86944 RIKEN cDNA 1810037C20 gene 1810037C20Rik  
 1428203\_at 1.24304 RIKEN cDNA C030002O17 gene C030002O17Rik  
 1428204\_at 0.98824 RIKEN cDNA C030002O17 gene C030002O17Rik  
 1428205\_x\_at 1.13384 RIKEN cDNA C030002O17 gene C030002O17Rik  
 1428206\_at 0.97583 coiled-coil domain containing 69 Ccdc69  
 1428207\_at 0.70015 B-cell CLL/lymphoma 7A Bcl7a  
 1428208\_at 1.20619 B-cell CLL/lymphoma 7A Bcl7a  
 1428209\_at 0.87795 brain expressed gene 4 Bex4  
 1428210\_s\_at 1.01344 conserved helix-loop-helix ubiquitous kinase Chuk  
 1428211\_at 0.87715 RIKEN cDNA 4933406E20 gene 4933406E20Rik  
 1428212\_x\_at 1.04930 ribosomal protein L31 /// similar to ribosomal protein L31 /// similar to  
 ribosomal protein L31 /// similar to ribosomal protein L31 /// similar to ribosomal protein L31 /// similar  
 to ribosomal protein L31 /// similar to ribosomal protein L31 /// similar to ribosomal protein L31 ///  
 similar to ribosomal protein L31 /// similar to ribosomal protein L31 Rpl31 /// LOC544868 ///  
 LOC632618 /// LOC638399 /// LOC665562 /// LOC667682 /// LOC670381 /// LOC672957 ///  
 LOC673582 /// LOC676592  
 1428213\_at 0.95989 RIKEN cDNA 2410003A14 gene 2410003A14Rik  
 1428214\_at 0.97690 translocase of outer mitochondrial membrane 7 homolog (yeast) Tomm7

1428215\_x\_at 0.92910 translocase of outer mitochondrial membrane 7 homolog (yeast) Tomm7  
1428216\_s\_at 0.96505 translocase of outer mitochondrial membrane 7 homolog (yeast) Tomm7  
1428217\_at 0.89550 RIKEN cDNA 1600012H06 gene 1600012H06Rik  
1428218\_a\_at 0.99481 RIKEN cDNA 1600012H06 gene 1600012H06Rik  
1428219\_at 0.86075 RING1 and YY1 binding protein /// similar to RING1 and YY1 binding protein Rybp /// LOC628746  
1428220\_at 1.03745 RIKEN cDNA 5730419I09 gene 5730419I09Rik  
1428221\_at 0.70273 kelch domain containing 8B Klhdc8b  
1428222\_at 0.93786 doublecortin and CaM kinase-like 2 Dcamk2  
1428223\_at 0.93331 major facilitator superfamily domain containing 2 Mfsd2  
1428224\_at 0.77297 heterogeneous nuclear ribonucleoprotein D-like Hnrpd1  
1428225\_s\_at 1.04029 heterogeneous nuclear ribonucleoprotein D-like Hnrpd1  
1428226\_at 1.06382 "neuroguidin, EIF4E binding protein" Ngdn  
1428227\_at 1.00254 RE1-silencing transcription factor Rest  
1428228\_at 0.95902 phosphoglucomutase 3 Pgm3  
1428229\_at 0.95345 "protein kinase C, nu" Prkc  
1428230\_at 0.94129 "protein kinase C, nu" Prkc  
1428231\_at 1.00826 cleavage and polyadenylation specific factor 6 Cpsf6  
1428232\_at 1.06317 cleavage and polyadenylation specific factor 6 Cpsf6  
1428233\_at 0.97845 cleavage and polyadenylation specific factor 6 Cpsf6  
1428234\_at 1.08717 cleavage and polyadenylation specific factor 6 Cpsf6  
1428235\_at 1.04766 "succinate dehydrogenase complex, subunit D, integral membrane protein" Sdhd  
1428236\_at 1.03735 acyl-Coenzyme A binding domain containing 5 Acbd5  
1428237\_at 0.97934 RIKEN cDNA 2700059D21 gene 2700059D21Rik  
1428238\_at 0.92108 RIKEN cDNA 2700059D21 gene 2700059D21Rik  
1428239\_at 1.15036 ankyrin repeat domain 16 Ankrd16  
1428240\_at 0.96960 neurexin I Nrxa1  
1428241\_at 0.83705 RIKEN cDNA 2310035K24 gene 2310035K24Rik  
1428242\_at 0.95807 histocompatibility (minor) HA-1 Hmha1  
1428243\_at 1.02783 RIKEN cDNA 1700021K19 gene 1700021K19Rik  
1428244\_at 1.16107 "La ribonucleoprotein domain family, member 1 /// similar to la related protein isoform 1" Larpl /// LOC631268  
1428245\_at 1.00124 "glucose 6 phosphatase, catalytic, 3" G6pc3  
1428246\_at 1.03416 vacuolar protein sorting 26 homolog B (yeast) Vps26b  
1428247\_at 0.97168 vacuolar protein sorting 26 homolog B (yeast) Vps26b  
1428248\_at 1.07870 "nuclear transcription factor, X-box binding 1" Nfx1  
1428249\_at 0.98410 pygopus 2 Pygo2  
1428250\_at 0.76202 G protein-coupled receptor 30 Gpr30  
1428251\_at 0.99307 SMC hinge domain containing 1 Smchd1  
1428252\_at 1.03077 chromatin modifying protein 2B Chmp2b  
1428253\_at 1.01785 chromatin modifying protein 2B Chmp2b  
1428254\_at 1.06767 Purine rich element binding protein B Purb  
1428255\_at 0.89160 Luc7 homolog (S. cerevisiae)-like Luc7l



1428256\_at 0.92826 RIKEN cDNA 2310047H23 gene 2310047H23Rik  
1428257\_s\_at 1.13296 dynein light chain roadblock-type 1 Dynlrb1  
1428258\_at 0.95781 RIKEN cDNA 2010107E04 gene 2010107E04Rik  
1428259\_at 0.95822 peroxidasin homolog (Drosophila) Pxdn  
1428260\_at 0.82771 spastic paraplegia 3A homolog (human) Spg3a  
1428261\_at 0.99265 RIKEN cDNA 2310042L06 gene 2310042L06Rik  
1428262\_s\_at 1.11911 heterogeneous nuclear ribonucleoprotein A3 /// similar to Hnrpa3 /// LOC545592 /// LOC629025 /// LOC630401 /// LOC668559  
1428263\_a\_at 1.07442 "transcription elongation factor B (SIII), polypeptide 2" Tceb2  
1428264\_at 1.07261 WD repeat domain 57 (U5 snRNP specific) Wdr57  
1428265\_at 1.26192 "protein phosphatase 2 (formerly 2A), regulatory subunit A (PR 65), beta isoform" Ppp2r1b  
1428266\_at 0.94012 "myosin, light polypeptide 3" Myl3  
1428267\_at 0.97500 DEAH (Asp-Glu-Ala-His) box polypeptide 40 Dhx40  
1428268\_at 0.87864 pleckstrin and Sec7 domain containing 2 Psd2  
1428269\_a\_at 0.85001 glycosyltransferase 8 domain containing 1 Glt8d1  
1428270\_at 0.91439 glycosyltransferase 8 domain containing 1 Glt8d1  
1428271\_at 1.00480 acyl-Coenzyme A binding domain containing 4 Acbd4  
1428272\_at 0.97359 eukaryotic translation initiation factor 1B Eif1b  
1428273\_at 0.93099 abhydrolase domain containing 13 Abhd13  
1428274\_s\_at 0.88582 abhydrolase domain containing 13 Abhd13  
1428275\_at 0.87835 abhydrolase domain containing 13 Abhd13  
1428276\_at 0.95861 abhydrolase domain containing 13 Abhd13  
1428277\_at 1.00209 OTU domain containing 6B Otud6b  
1428278\_at 1.01091 "zinc finger, DHHC domain containing 24" Zdhhc24  
1428279\_a\_at 1.17062 ataxin 7-like 4 Atxn7l4  
1428280\_at 0.86660 FIP1 like 1 (S. cerevisiae) Fip111  
1428281\_at 1.02699 TruB pseudouridine (psi) synthase homolog 1 (E. coli) Trub1  
1428282\_at 1.06429 tubulin-specific chaperone e Tbce  
1428283\_at 1.29980 "cytochrome P450, family 2, subfamily s, polypeptide 1" Cyp2s1  
1428284\_at 0.94744 RIKEN cDNA 8430427H17 gene 8430427H17Rik  
1428285\_at 0.92905 RIKEN cDNA 8430427H17 gene 8430427H17Rik  
1428286\_at 1.03164 --- ---  
1428287\_at 1.04842 cullin 5 Cul5  
1428288\_at 0.82676 Kruppel-like factor 9 Klf9  
1428289\_at 0.79912 Kruppel-like factor 9 Klf9  
1428290\_at 0.97173 mitochondrial intermediate peptidase Mipep  
1428291\_at 1.06132 exosome component 8 Exosc8  
1428292\_at 0.99405 NADPH dependent diflavin oxidoreductase 1 Ndor1  
1428293\_at 0.95308 RIKEN cDNA 2310022M17 gene 2310022M17Rik  
1428294\_at 0.96532 zinc finger protein 259 Zfp259

1428295\_at 1.01413 synaptopodin 2-like Synpo2l  
1428296\_at 0.91706 polymerase (RNA) II (DNA directed) polypeptide L Polr2l  
1428297\_at 1.01880 mitogen activated protein kinase kinase kinase 2 Map4k2  
1428298\_at 0.85420 RIKEN cDNA 1700029G01 gene 1700029G01Rik  
1428299\_at 0.96382 dual-specificity tyrosine-(Y)-phosphorylation regulated kinase 1a Dyrk1a  
1428300\_at 0.91439 RIKEN cDNA 4932439K10 gene 4932439K10Rik  
1428301\_at 0.96423 hypothetical protein LOC544988 /// RIKEN cDNA B930046C15 gene ///  
hypothetical protein LOC545007 /// RIKEN cDNA 2610042L04 gene /// similar to Spetex-2H protein ///  
similar to Spetex-2H protein /// hypothetical protein LOC664825 /// similar to Spetex-2F protein ///  
similar to Spetex-2H protein /// similar to Spetex-2H protein /// similar to Spetex-2H protein ///  
hypothetical protein LOC666740 /// hypothetical protein LOC666772 /// hypothetical protein  
LOC666890 /// hypothetical protein LOC671957 LOC544988 /// B930046C15Rik /// LOC545007 ///  
2610042L04Rik /// LOC622931 /// LOC638853 /// LOC664825 /// LOC666193 /// LOC666329 ///  
LOC666442 /// LOC666684 /// LOC666740 /// LOC666772 /// LOC666890 /// LOC671957  
1428302\_at 1.11540 mitochondrial ribosomal protein L48 Mrpl48  
1428303\_at 1.00120 RIKEN cDNA 1500005I02 gene 1500005I02Rik  
1428304\_at 0.94247 establishment of cohesion 1 homolog 2 (S. cerevisiae) Esco2  
1428305\_at 0.93725 proprotein convertase subtilisin/kexin type 2 Pcsk2  
1428306\_at 1.56003 DNA-damage-inducible transcript 4 Ddit4  
1428307\_at 0.99102 "zinc finger, DHHC domain containing 13" Zdhhc13  
1428308\_at 1.00685 p53 and DNA damage regulated 1 Pdrg1  
1428309\_s\_at 1.04176 p53 and DNA damage regulated 1 Pdrg1  
1428310\_at 0.96222 "La ribonucleoprotein domain family, member 7" Larp7  
1428311\_at 1.05244 coiled-coil domain containing 6 Ccdc6  
1428312\_at 1.02690 leucine rich repeat containing 57 Lrrc57  
1428313\_at 1.09133 "zinc finger, SWIM domain containing 3" Zswim3  
1428314\_at 0.97713 PEST proteolytic signal containing nuclear protein Pcnp  
1428315\_at 1.18887 EBNA1 binding protein 2 Ebna1bp2  
1428316\_a\_at 1.04571 FUN14 domain containing 2 Fundc2  
1428317\_at 0.94620 --- ---  
1428318\_at 1.00085 submandibular gland protein C Smgc  
1428319\_at 0.78780 PDZ and LIM domain 7 Pdlim7  
1428320\_at 0.97365 jumonji domain containing 1B Jmjd1b  
1428321\_at 0.85631 echinoderm microtubule associated protein like 1 /// similar to echinoderm  
microtubule associated protein like 1 Eml1 /// LOC634102  
1428322\_a\_at 0.95802 "NADH dehydrogenase (ubiquinone) 1 beta subcomplex, 10" Ndufb10  
1428323\_at 1.13121 "glycerol phosphate dehydrogenase 2, mitochondrial" Gpd2  
1428324\_at 1.19684 --- ---  
1428325\_at 0.94103 RIKEN cDNA 2610019P18 gene 2610019P18Rik  
1428326\_s\_at 1.04334 heat-responsive protein 12 Hrsp12  
1428327\_at 0.93472 "trafficking protein, kinesin binding 1" Trak1  
1428328\_at 0.94481 nucleoporin 50 Nup50  
1428329\_a\_at 0.79665 intraflagellar transport 80 homolog (Chlamydomonas) Ift80

|              |         |                                                                                                 |          |               |
|--------------|---------|-------------------------------------------------------------------------------------------------|----------|---------------|
| 1428330_at   | 1.02471 | dopey family member 2                                                                           | Dopey2   |               |
| 1428331_at   | 0.97672 | RIKEN cDNA 2210016F16                                                                           | gene     | 2210016F16Rik |
| 1428332_at   | 0.70462 | RIKEN cDNA 1500004A08                                                                           | gene     | 1500004A08Rik |
| 1428333_at   | 0.99268 | RIKEN cDNA 2900062L11                                                                           | gene     | 2900062L11Rik |
| 1428334_at   | 1.06128 | osteopetrosis associated transmembrane protein 1                                                |          | Ostm1         |
| 1428335_a_at | 0.96294 | sec1 family domain containing 1                                                                 | Scfd1    |               |
| 1428336_at   | 0.99648 | "1-acylglycerol-3-phosphate O-acyltransferase 1 (lysophosphatidic acid acyltransferase, delta)" | Agpat4   |               |
| 1428337_at   | 0.98864 | RIKEN cDNA 1810034K20                                                                           | gene     | 1810034K20Rik |
| 1428338_at   | 0.90290 | RIKEN cDNA 2610039E05                                                                           | gene     | 2610039E05Rik |
| 1428339_at   | 0.94042 | nudix (nucleoside diphosphate linked moiety X)-type motif 21                                    | Nudt21   |               |
| 1428340_s_at | 0.84006 | ATPase type 13A2                                                                                | Atp13a2  |               |
| 1428341_at   | 0.98422 | zinc finger protein 655                                                                         | Zfp655   |               |
| 1428342_at   | 0.85986 | REST corepressor 3                                                                              | Rcor3    |               |
| 1428343_at   | 0.94100 | REST corepressor 3                                                                              | Rcor3    |               |
| 1428344_at   | 0.90107 | phosphatidic acid phosphatase type 2 domain containing 2                                        |          | Ppapdc2       |
| 1428345_at   | 0.89123 | phosphatidic acid phosphatase type 2 domain containing 2                                        |          | Ppapdc2       |
| 1428346_at   | 0.86297 | TRAF type zinc finger domain containing 1                                                       | Trafd1   |               |
| 1428347_at   | 0.92180 | cytoplasmic FMR1 interacting protein 2                                                          | Cyfp2    |               |
| 1428348_at   | 0.95840 | zinc finger protein 336                                                                         | Zfp336   |               |
| 1428349_s_at | 0.99585 | early B-cell factor 3                                                                           | Ebf3     |               |
| 1428350_at   | 1.07155 | RIKEN cDNA 2310061F22                                                                           | gene     | 2310061F22Rik |
| 1428351_at   | 0.97001 | protein phosphatase 1M                                                                          | Ppm1m    |               |
| 1428352_at   | 1.38048 | arrestin domain containing 2                                                                    | Arrdc2   |               |
| 1428353_at   | 1.12701 | forkhead box K2                                                                                 | Foxk2    |               |
| 1428354_at   | 1.19533 | forkhead box K2                                                                                 | Foxk2    |               |
| 1428355_at   | 1.08437 | oxysterol binding protein 2                                                                     | Osbp2    |               |
| 1428356_at   | 0.92472 | oxysterol binding protein 2                                                                     | Osbp2    |               |
| 1428357_at   | 0.93286 | RIKEN cDNA 2610019F03                                                                           | gene     | 2610019F03Rik |
| 1428358_at   | 0.90500 | RIKEN cDNA 1810010M01                                                                           | gene     | 1810010M01Rik |
| 1428359_s_at | 0.92811 | RIKEN cDNA 1810010M01                                                                           | gene     | 1810010M01Rik |
| 1428360_x_at | 0.99029 | "NADH dehydrogenase (ubiquinone) 1 alpha subcomplex, 7 (B14.5a)"                                |          | Ndufa7        |
| 1428361_x_at | 0.87159 | "hemoglobin alpha, adult chain 1"                                                               | Hba-a1   |               |
| 1428362_at   | 0.98851 | "eukaryotic translation initiation factor 4, gamma 2"                                           | Eif4g2   |               |
| 1428363_at   | 0.96253 | "eukaryotic translation initiation factor 4, gamma 2"                                           | Eif4g2   |               |
| 1428364_at   | 1.10120 | sodium channel modifier 1                                                                       | Scnm1    |               |
| 1428365_a_at | 1.27400 | "protease, serine, 15"                                                                          | Prss15   |               |
| 1428366_at   | 1.05730 | RIKEN cDNA 1600027N09                                                                           | gene     | 1600027N09Rik |
| 1428367_at   | 0.94486 | N-deacetylase/N-sulfotransferase (heparan glucosaminyl) 1                                       |          | Ndst1         |
| 1428368_at   | 0.86218 | Rho GTPase activating protein 21                                                                | Arhgap21 |               |
| 1428369_s_at | 0.88771 | Rho GTPase activating protein 21                                                                | Arhgap21 |               |
| 1428370_at   | 1.00004 | RIKEN cDNA 1500011B03                                                                           | gene     | 1500011B03Rik |

1428371\_at 0.94385 RIKEN cDNA 2610507N02 gene 2610507N02Rik  
1428372\_at 1.09422 suppression of tumorigenicity 5 St5  
1428373\_at 1.10464 inositol hexaphosphate kinase 2 Ihpk2  
1428374\_at 1.04120 glucuronyl C5-epimerase Glce  
1428375\_at 0.74256 RIKEN cDNA 4932415G12 gene 4932415G12Rik  
1428376\_at 0.90315 RIKEN cDNA 4932415G12 gene 4932415G12Rik  
1428377\_at 0.78816 BTB (POZ) domain containing 11 Btbd11  
1428378\_at 1.04783 "zinc finger CCCH type, antiviral 1" Zc3hav1  
1428379\_at 1.11915 "solute carrier family 17 (sodium-dependent inorganic phosphate cotransporter), member 6" Slc17a6  
1428380\_at 1.01721 RIKEN cDNA 0610007C21 gene 0610007C21Rik  
1428381\_a\_at 0.93331 RIKEN cDNA 2700038C09 gene 2700038C09Rik  
1428382\_at 0.94332 "SWI/SNF related, matrix associated, actin dependent regulator of chromatin, subfamily c, member 2" Smarcc2  
1428383\_a\_at 1.08930 RIKEN cDNA 2310021P13 gene 2310021P13Rik  
1428384\_at 0.98358 "DNA segment, Chr 4, Brigham & Women's Genetics 0951 expressed" D4Bwg0951e  
1428385\_at 0.92830 membrane-associated ring finger (C3HC4) 8 8-Mar  
1428386\_at 1.17532 acyl-CoA synthetase long-chain family member 3 Acsl3  
1428387\_at 1.13362 acyl-CoA synthetase long-chain family member 3 Acsl3  
1428388\_at 0.97155 "tankyrase, TRF1-interacting ankyrin-related ADP-ribose polymerase 2" Tnks2  
1428389\_s\_at 1.10944 WD repeat domain 43 Wdr43  
1428390\_at 1.21596 WD repeat domain 43 Wdr43  
1428391\_at 0.75456 RAB3A interacting protein (rabin3)-like 1 Rab3il1  
1428392\_at 0.98002 Ras association (RalGDS/AF-6) domain family 2 Rassf2  
1428393\_at 0.88795 neuritin 1 Nrn1  
1428394\_at 0.49605 phytanoyl-CoA dioxygenase domain containing 1 /// leucine rich repeat containing 8A Phyhd1 /// Lrrc8a  
1428395\_at 1.04828 SMAD specific E3 ubiquitin protein ligase 1 /// similar to Smad ubiquitination regulatory factor 1 (Ubiquitin--protein ligase SMURF1) (Smad-specific E3 ubiquitin ligase 1) (hSMURF1) Smurf1 /// LOC640390  
1428396\_at 0.96993 SMAD specific E3 ubiquitin protein ligase 1 /// similar to Smad ubiquitination regulatory factor 1 (Ubiquitin--protein ligase SMURF1) (Smad-specific E3 ubiquitin ligase 1) (hSMURF1) Smurf1 /// LOC640390  
1428397\_at 0.95661 "UDP-Gal:betaGlcNAc beta 1,3-galactosyltransferase, polypeptide 5" B3galt5  
1428398\_at 0.98971 "UDP-Gal:betaGlcNAc beta 1,3-galactosyltransferase, polypeptide 5" B3galt5  
1428399\_a\_at 1.00835 armadillo repeat containing 9 Armc9  
1428400\_at 0.95427 RIKEN cDNA 2200002K05 gene 2200002K05Rik  
1428401\_at 0.87741 "zinc finger, CCHC domain containing 3" Zcchc3  
1428402\_at 0.90824 "zinc finger, CCHC domain containing 3" Zcchc3  
1428403\_at 0.98242 RIKEN cDNA 2410025L10 gene 2410025L10Rik

|              |         |                                                                       |               |  |
|--------------|---------|-----------------------------------------------------------------------|---------------|--|
| 1428404_at   | 0.85407 | RIKEN cDNA 2410025L10 gene                                            | 2410025L10Rik |  |
| 1428405_at   | 0.93289 | host cell factor C1 regulator 1 (XPO1-dependent)                      | Hcfc1r1       |  |
| 1428406_s_at | 0.92998 | host cell factor C1 regulator 1 (XPO1-dependent)                      | Hcfc1r1       |  |
| 1428407_at   | 0.96222 | heterogeneous nuclear ribonucleoprotein A0                            | Hnrpa0        |  |
| 1428408_a_at | 1.01712 | "DNA segment, Chr 12, ERATO Doi 551, expressed"                       | D12Ert551e    |  |
| 1428409_at   | 1.17514 | N-acetyltransferase 13                                                | Nat13         |  |
| 1428410_at   | 1.00160 | N-acetyltransferase 13                                                | Nat13         |  |
| 1428411_at   | 0.94892 | RIKEN cDNA 1700020I14 gene                                            | 1700020I14Rik |  |
| 1428412_at   | 0.96742 | transmembrane 9 superfamily member 3                                  | Tm9sf3        |  |
| 1428413_at   | 0.80796 | RIKEN cDNA 5730405I09 gene                                            | 5730405I09Rik |  |
| 1428414_at   | 1.09158 | RIKEN cDNA 5730405I09 gene                                            | 5730405I09Rik |  |
| 1428415_at   | 0.88830 | ring finger protein 113A2                                             | Rnf113a2      |  |
| 1428416_at   | 0.84673 | RIKEN cDNA 3110050N22 gene                                            | 3110050N22Rik |  |
| 1428417_at   | 0.82833 | RIKEN cDNA 3110050N22 gene                                            | 3110050N22Rik |  |
| 1428418_s_at | 1.01180 | RIKEN cDNA 3110050N22 gene                                            | 3110050N22Rik |  |
| 1428419_at   | 1.04103 | RIKEN cDNA 5430411K18 gene                                            | 5430411K18Rik |  |
| 1428420_a_at | 1.06787 | RIKEN cDNA 1200009I06 gene                                            | 1200009I06Rik |  |
| 1428421_a_at | 1.00618 | RIKEN cDNA 2700085E05 gene                                            | 2700085E05Rik |  |
| 1428422_at   | 1.07328 | UBX domain containing 8                                               | Ubx8          |  |
| 1428423_at   | 0.93029 | polycomb group ring finger 3                                          | Pcgf3         |  |
| 1428424_at   | 1.01869 | polycomb group ring finger 3                                          | Pcgf3         |  |
| 1428425_at   | 1.00632 | "transforming growth factor, beta receptor associated protein 1"      | Tgfbrap1      |  |
| 1428426_s_at | 0.96577 | "transforming growth factor, beta receptor associated protein 1"      | Tgfbrap1      |  |
| 1428427_at   | 1.03022 | F-box and leucine-rich repeat protein 2                               | Fbxl2         |  |
| 1428428_at   | 1.17206 | abhydrolase domain containing 11                                      | Abhd11        |  |
| 1428429_at   | 1.03919 | "RGM domain family, member B"                                         | Rgmb          |  |
| 1428430_at   | 0.91452 | "RGM domain family, member B"                                         | Rgmb          |  |
| 1428431_at   | 0.77125 | RIKEN cDNA 2310047A01 gene                                            | 2310047A01Rik |  |
| 1428432_at   | 0.78783 | RIKEN cDNA 2310047A01 gene                                            | 2310047A01Rik |  |
| 1428433_at   | 0.69561 | homeodomain interacting protein kinase 2                              | Hipk2         |  |
| 1428434_at   | 1.00864 | "zinc finger, CCHC domain containing 12"                              | Zcchc12       |  |
| 1428435_at   | 0.93764 | mucin 2                                                               | Muc2          |  |
| 1428436_at   | 0.98426 | "LSM14 homolog A (SCD6, S. cerevisiae)"                               | Lsm14a        |  |
| 1428437_at   | 0.84814 | "LSM14 homolog A (SCD6, S. cerevisiae)"                               | Lsm14a        |  |
| 1428438_s_at | 0.93610 | "LSM14 homolog A (SCD6, S. cerevisiae)"                               | Lsm14a        |  |
| 1428439_at   | 1.02809 | negative regulator of ubiquitin-like proteins 1                       | Nub1          |  |
| 1428440_at   | 0.92304 | "solute carrier family 25 (mitochondrial carrier, Aralar), member 12" | Slc25a12      |  |
| 1428441_at   | 1.06870 | RIKEN cDNA 1500009M05 gene                                            | 1500009M05Rik |  |
| 1428442_at   | 1.05457 | cDNA sequence BC029722                                                | BC029722      |  |
| 1428443_a_at | 0.74635 | Rap1 GTPase-activating protein                                        | Rap1gap       |  |
| 1428444_at   | 0.99892 | ankyrin repeat and SOCS box-containing protein 2                      | Asb2          |  |
| 1428445_at   | 0.88534 | Yip1 interacting factor homolog B (S. cerevisiae)                     | Yif1b         |  |
| 1428446_at   | 0.82509 | dynein cytoplasmic 2 light intermediate chain 1                       | Dync2li1      |  |

|              |         |                                                                             |               |         |
|--------------|---------|-----------------------------------------------------------------------------|---------------|---------|
| 1428447_at   | 0.99635 | transmembrane protein 14A                                                   | Tmem14a       |         |
| 1428448_a_at | 0.99208 | "general transcription factor IIIC, polypeptide 2, beta"                    |               | Gtf3c2  |
| 1428449_at   | 0.86906 | "general transcription factor IIIC, polypeptide 2, beta"                    |               | Gtf3c2  |
| 1428450_at   | 0.90536 | RIKEN cDNA 2610034B18 gene                                                  | 2610034B18Rik |         |
| 1428451_at   | 1.01069 | leucine rich repeat containing 47                                           | Lrrc47        |         |
| 1428452_at   | 1.06400 | RIKEN cDNA 2810025M15 gene                                                  | 2810025M15Rik |         |
| 1428453_at   | 0.92450 | N-acetyltransferase 12                                                      | Nat12         |         |
| 1428454_at   | 0.90178 | breast carcinoma amplified sequence 3                                       | Bcas3         |         |
| 1428455_at   | 0.93215 | "procollagen, type XIV, alpha 1"                                            | Col14a1       |         |
| 1428456_at   | 1.05631 | bolA-like 1 (E. coli)                                                       | Bol1          |         |
| 1428457_at   | 1.03534 | RIKEN cDNA 5830472M02 gene                                                  | 5830472M02Rik |         |
| 1428458_at   | 1.28853 | "processing of precursor 1, ribonuclease P/MRP family, (S. cerevisiae)"     | Pop1          |         |
| 1428459_at   | 1.09917 | PRAME family member 12                                                      | Pramef12      |         |
| 1428460_at   | 0.97832 | synapsin II                                                                 | Syn2          |         |
| 1428461_at   | 1.09680 | "protein phosphatase 2, regulatory subunit B (B56), epsilon isoform"        |               | Ppp2r5e |
| 1428462_at   | 0.86322 | "protein phosphatase 2, regulatory subunit B (B56), epsilon isoform"        |               | Ppp2r5e |
| 1428463_a_at | 0.89631 | "protein phosphatase 2, regulatory subunit B (B56), epsilon isoform"        |               | Ppp2r5e |
| 1428464_at   | 0.92571 | "NADH dehydrogenase (ubiquinone) 1 alpha subcomplex, 3"                     | Ndufa3        |         |
| 1428465_at   | 1.01435 | transmembrane protein 147                                                   | Tmem147       |         |
| 1428466_at   | 0.96602 | chromodomain helicase DNA binding protein 3                                 | Chd3          |         |
| 1428467_at   | 0.84268 | TAR DNA binding protein                                                     | Tardbp        |         |
| 1428468_at   | 0.98693 | RIKEN cDNA 3110043O21 gene                                                  | 3110043O21Rik |         |
| 1428469_a_at | 1.03447 | DAZ interacting protein 1                                                   | Dzip1         |         |
| 1428470_at   | 0.98952 | exocyst complex component 2                                                 | Exoc2         |         |
| 1428471_at   | 0.67202 | sorbin and SH3 domain containing 1                                          | Sorbs1        |         |
| 1428472_at   | 0.75912 | splA/ryanodine receptor domain and SOCS box containing 1                    | Spsb1         |         |
| 1428473_at   | 0.98008 | "protein phosphatase 3, catalytic subunit, beta isoform"                    |               | Ppp3cb  |
| 1428474_at   | 0.87363 | "protein phosphatase 3, catalytic subunit, beta isoform"                    |               | Ppp3cb  |
| 1428475_at   | 1.21477 | RIKEN cDNA 1190005P17 gene                                                  | 1190005P17Rik |         |
| 1428476_a_at | 1.12133 | elaC homolog 2 (E. coli)                                                    | Elac2         |         |
| 1428477_at   | 1.02232 | elaC homolog 2 (E. coli)                                                    | Elac2         |         |
| 1428478_at   | 1.03616 | receptor accessory protein 4                                                | Reep4         |         |
| 1428479_at   | 1.07668 | "nuclear factor of activated T-cells, cytoplasmic, calcineurin-dependent 1" |               | Nfatc1  |
| 1428480_at   | 1.08796 | cell division cycle associated 8                                            | Cdca8         |         |
| 1428481_s_at | 0.99490 | cell division cycle associated 8                                            | Cdca8         |         |
| 1428482_at   | 1.09132 | A kinase (PRKA) anchor protein 10                                           | Akap10        |         |
| 1428483_a_at | 0.97547 | RIKEN cDNA 2610039C10 gene                                                  | 2610039C10Rik |         |
| 1428484_at   | 1.11702 | oxysterol binding protein-like 3                                            | Osbpl3        |         |
| 1428485_at   | 0.88463 | carbonic anhydrase 12                                                       | Car12         |         |
| 1428486_at   | 0.98259 | RIKEN cDNA 1700123L14 gene                                                  | 1700123L14Rik |         |
| 1428487_s_at | 0.87762 | coenzyme Q10 homolog B (S. cerevisiae)                                      | Coq10b        |         |
| 1428488_at   | 0.95950 | "phosphatidylinositol glycan anchor biosynthesis, class K"                  |               | Pigk    |

1428489\_at 0.99659 zinc finger CCHC-type and RNA binding motif 1 Zcrb1  
 1428490\_at 0.99145 "core 1 UDP-galactose:N-acetylgalactosamine-alpha-R beta 1,3-galactosyltransferase" C1galt1  
 1428491\_at 1.06587 COMM domain containing 10 Commd10  
 1428492\_at 0.99066 GLI pathogenesis-related 2 Glipr2  
 1428493\_at 1.07078 RIKEN cDNA 2610511M17 gene /// similar to signal-induced proliferation-associated 1 like 3 2610511M17Rik /// LOC672426  
 1428494\_a\_at 0.94567 polymerase (RNA) II (DNA directed) polypeptide I Polr2i  
 1428495\_at 1.07386 RIKEN cDNA 2410003K15 gene 2410003K15Rik  
 1428496\_at 1.08075 SECIS binding protein 2 Secisbp2  
 1428497\_at 1.08064 SECIS binding protein 2 Secisbp2  
 1428498\_at 0.90922 RIKEN cDNA 2610206B13 gene 2610206B13Rik  
 1428499\_at 0.93260 RIKEN cDNA 2810454L23 gene 2810454L23Rik  
 1428500\_at 0.93064 RIKEN cDNA 2210419D22 gene 2210419D22Rik  
 1428501\_at 0.89853 RIKEN cDNA 1110051M20 gene 1110051M20Rik  
 1428502\_at 0.97365 ARP6 actin-related protein 6 homolog (yeast) Actr6  
 1428503\_a\_at 1.10822 NFkB inhibitor interacting Ras-like protein 1 Nkiras1  
 1428504\_at 1.01906 X-ray repair complementing defective repair in Chinese hamster cells 6 Xrcc6  
 1428505\_at 0.94600 RIKEN cDNA 2310015N07 gene 2310015N07Rik  
 1428506\_at 1.13061 5-aminoimidazole-4-carboxamide ribonucleotide formyltransferase/IMP cyclohydrolase Atic  
 1428507\_at 0.99514 haloacid dehalogenase-like hydrolase domain containing 2 Hdhd2  
 1428508\_at 0.88581 "TBC1 domain family, member 2B" Tbc1d2b  
 1428509\_at 0.90884 myosin IE Myo1e  
 1428510\_at 0.69305 latrophilin 1 Lphn1  
 1428511\_at 1.10724 "phosphorylase kinase, gamma 2 (testis)" Phkg2  
 1428512\_at 0.98973 "basic helix-loop-helix domain containing, class B9" Bhlhb9  
 1428513\_at 0.89054 calcium binding and coiled coil domain 1 Calcoco1  
 1428514\_at 1.14957 copine III Cpne3  
 1428515\_at 1.16142 RIKEN cDNA 2410012H22 gene 2410012H22Rik  
 1428516\_a\_at 1.06384 "alkB, alkylation repair homolog 7 (E. coli)" Alkbh7  
 1428517\_at 0.89555 WD repeat and FYVE domain containing 3 Wdfy3  
 1428518\_at 1.06757 myeloid leukemia factor 1 interacting protein Mlf1ip  
 1428519\_at 1.08485 RIKEN cDNA 2610528E23 gene 2610528E23Rik  
 1428520\_at 1.00490 RIKEN cDNA 1110032A13 gene 1110032A13Rik  
 1428521\_at 1.01325 "THAP domain containing, apoptosis associated protein 3" Thap3  
 1428522\_at 0.96179 "transcription termination factor, RNA polymerase II" Ttf2  
 1428523\_at 0.90084 latrophilin 3 Lphn3  
 1428524\_at 0.81141 RIKEN cDNA 2310051N18 gene 2310051N18Rik  
 1428525\_at 0.97166 RIKEN cDNA 4930488B01 gene 4930488B01Rik  
 1428526\_at 1.08195 LSM domain containing 1 Lsmd1  
 1428527\_at 0.99053 sorting nexin 7 Snx7  
 1428528\_at 0.96155 RIKEN cDNA 1110007L15 gene 1110007L15Rik

1428529\_at 1.05554 RIKEN cDNA 2810026P18 gene 2810026P18Rik  
 1428530\_x\_at 1.07182 ribosomal protein S24 /// similar to ribosomal protein S24 /// similar to  
 ribosomal protein S24 /// similar to ribosomal protein S24 Rps24 /// LOC629116 /// LOC636056 ///  
 LOC677113  
 1428531\_at 1.03659 integrator complex subunit 7 Ints7  
 1428532\_at 0.99754 integrator complex subunit 7 Ints7  
 1428533\_at 0.97691 "DNA segment, Chr 1, Brigham & Women's Genetics 0212 expressed"  
 D1Bwg0212e  
 1428534\_at 1.09462 RIKEN cDNA 2310073E15 gene 2310073E15Rik  
 1428535\_at 1.01782 RIKEN cDNA 9430020K01 gene 9430020K01Rik  
 1428536\_at 0.95411 "potassium voltage-gated channel, subfamily G, member 4" Kcng4  
 1428537\_at 1.02502 "casein kinase 1, alpha 1" Csnk1a1  
 1428538\_s\_at 1.04338 retinoic acid receptor responder (tazarotene induced) 2 Rarres2  
 1428539\_at 1.05191 RIKEN cDNA 2610207I05 gene 2610207I05Rik  
 1428540\_at 0.83057 RIKEN cDNA 3321401G04 gene 3321401G04Rik  
 1428541\_at 0.98753 RIKEN cDNA 3321401G04 gene 3321401G04Rik  
 1428542\_at 1.10757 RIKEN cDNA 2010003J03 gene 2010003J03Rik  
 1428543\_at 1.05607 phosphoribosyl pyrophosphate amidotransferase Ppat  
 1428544\_at 0.99955 RIKEN cDNA 0610007L01 gene 0610007L01Rik  
 1428545\_at 1.02428 RIKEN cDNA 0610007L01 gene 0610007L01Rik  
 1428546\_at 1.01694 "synaptotagmin binding, cytoplasmic RNA interacting protein" Syncrip  
 1428547\_at 0.44609 "5' nucleotidase, ecto" Nt5e  
 1428548\_at 0.94049 p21 (CDKN1A)-activated kinase 4 Pak4  
 1428549\_at 0.87903 coiled-coil domain containing 3 Ccdc3  
 1428550\_at 0.87345 RIKEN cDNA 1810015A11 gene 1810015A11Rik  
 1428551\_at 1.11452 RIKEN cDNA 2410075D05 gene 2410075D05Rik  
 1428552\_at 1.04036 RIKEN cDNA 2610001J05 gene 2610001J05Rik  
 1428553\_at 1.10739 glutaredoxin 5 homolog (*S. cerevisiae*) Glrx5  
 1428554\_a\_at 1.00885 RIKEN cDNA 1810035L17 gene 1810035L17Rik  
 1428555\_at 1.04048 SET domain containing 2 Setd2  
 1428556\_at 1.02123 "phosphatidylinositol glycan anchor biosynthesis, class Y" Pigy  
 1428557\_a\_at 1.06774 O-sialoglycoprotein endopeptidase-like 1 Osgepl1  
 1428558\_at 1.01494 O-sialoglycoprotein endopeptidase-like 1 Osgepl1  
 1428559\_at 0.97295 follicular lymphoma variant translocation 1 Fvt1  
 1428560\_at 1.16690 exportin 5 Xpo5  
 1428561\_at 1.02377 RIKEN cDNA 2610002J23 gene 2610002J23Rik  
 1428562\_at 1.26344 RIKEN cDNA 2210403K04 gene 2210403K04Rik  
 1428563\_at 1.13286 DEAD (Asp-Glu-Ala-Asp) box polypeptide 10 Ddx10  
 1428564\_at 0.93933 zinc finger protein 579 Zfp579  
 1428565\_at 1.08783 unkempt-like (*Drosophila*) Unkl  
 1428566\_at 1.04849 Hspb associated protein 1 Hspbap1  
 1428567\_at 1.08060 Hspb associated protein 1 Hspbap1  
 1428568\_at 1.12262 RIKEN cDNA B230217C12 gene B230217C12Rik



1428569\_at 1.04644 RIKEN cDNA B230217C12 gene B230217C12Rik  
1428570\_at 1.05151 cyclin C Ccnc  
1428571\_at 0.87028 "procollagen, type IX, alpha 1" Col9a1  
1428572\_at 1.07585 "brain abundant, membrane attached signal protein 1" Basp1  
1428573\_at 0.78386 chimerin (chimaerin) 2 Chn2  
1428574\_a\_at 0.95333 chimerin (chimaerin) 2 Chn2  
1428575\_at 0.87761 FCH domain only 1 Fcho1  
1428576\_at 1.01317 "hypoxia-inducible factor 1, alpha subunit inhibitor" Hif1an  
1428577\_at 0.95715 "protein tyrosine phosphatase, receptor type, f polypeptide (PTPRF), interacting protein (liprin), alpha 4" Ppfia4  
1428578\_s\_at 1.00694 "protein tyrosine phosphatase, receptor type, f polypeptide (PTPRF), interacting protein (liprin), alpha 4" Ppfia4  
1428579\_at 1.12779 formin-like 2 Fmnl2  
1428580\_at 1.09809 biliverdin reductase A Blvra  
1428581\_at 0.95586 RIKEN cDNA 1700024G10 gene 1700024G10Rik  
1428582\_at 1.13351 RIKEN cDNA 2010208K18 gene 2010208K18Rik  
1428583\_at 0.98746 nuclear fragile X mental retardation protein interacting protein 2 Nufip2  
1428584\_a\_at 1.14604 hydroxyacylglutathione hydrolase-like Haghl  
1428585\_at 1.02059 "actinin, alpha 1" Actn1  
1428586\_at 1.02494 transmembrane protein 41B Tmem41b  
1428587\_at 1.08426 transmembrane protein 41B Tmem41b  
1428588\_a\_at 0.99529 mitochondrial ribosomal protein L41 Mrpl41  
1428589\_at 1.10078 mitochondrial ribosomal protein L41 Mrpl41  
1428590\_at 0.87063 mitochondrial ribosomal protein L41 Mrpl41  
1428591\_at 0.86853 patatin-like phospholipase domain containing 2 Pnpla2  
1428592\_s\_at 0.81432 ubiquitin specific peptidase 38 Usp38  
1428593\_at 1.10584 RIKEN cDNA 1700029F09 gene 1700029F09Rik  
1428594\_at 0.92258 GTPase activating RANGAP domain-like 1 Garnl1  
1428595\_at 0.84713 "solute carrier family 6 (neurotransmitter transporter), member 19" Slc6a19  
1428596\_at 0.81722 "TBC1 domain family, member 9B" Tbc1d9b  
1428597\_at 0.90236 "TBC1 domain family, member 9B" Tbc1d9b  
1428598\_at 1.06553 "TBC1 domain family, member 7" Tbc1d7  
1428599\_at 1.25170 kinase non-catalytic C-lobe domain (KIND) containing 1 Kndc1  
1428600\_at 1.07639 RIKEN cDNA 3110068G20 gene 3110068G20Rik  
1428601\_at 0.91454 RIKEN cDNA 1700003E16 gene 1700003E16Rik  
1428602\_at 1.17356 "potassium inwardly-rectifying channel, subfamily J, member 9" Kcnj9  
1428603\_at 0.93303 glucocorticoid induced transcript 1 Glcci1  
1428604\_at 0.99193 RIKEN cDNA 2610305D13 gene 2610305D13Rik  
1428605\_at 1.05610 similar to Y73E7A.1 LOC669879  
1428606\_at 0.83078 coiled-coil domain containing 124 Ccdc124  
1428607\_at 0.90136 v-raf murine sarcoma 3611 viral oncogene homolog Araf  
1428608\_at 0.93988 "myosin light chain, regulatory B" Mylc2b  
1428609\_at 0.88235 "myosin light chain, regulatory B /// similar to myosin regulatory light chain-

like /// similar to Myosin regulatory light chain 2-B, smooth muscle isoform (Myosin RLC-B)"  
Mylc2b /// LOC630701 /// LOC640689

|              |         |                                                                                          |                                     |  |
|--------------|---------|------------------------------------------------------------------------------------------|-------------------------------------|--|
| 1428610_at   | 0.89331 | autophagy-related 7 (yeast)                                                              | Atg7                                |  |
| 1428611_at   | 1.02410 | autophagy-related 7 (yeast)                                                              | Atg7                                |  |
| 1428612_at   | 0.87656 | autophagy-related 7 (yeast)                                                              | Atg7                                |  |
| 1428613_at   | 0.96650 | lactate dehydrogenase D                                                                  | Ldhd                                |  |
| 1428614_at   | 1.04302 | lactate dehydrogenase D                                                                  | Ldhd                                |  |
| 1428615_at   | 0.98106 | "purinergic receptor P2Y, G-protein coupled, 5"                                          | P2ry5                               |  |
| 1428616_at   | 1.00214 | zinc finger protein 131                                                                  | Zfp131                              |  |
| 1428617_at   | 1.03735 | host cell factor C2                                                                      | Hcfc2                               |  |
| 1428618_at   | 1.13143 | host cell factor C2                                                                      | Hcfc2                               |  |
| 1428619_at   | 0.81660 | RIKEN cDNA 2310005N03 gene                                                               | 2310005N03Rik                       |  |
| 1428620_at   | 0.97151 | endosulfine alpha                                                                        | Ensa                                |  |
| 1428621_a_at | 1.06980 | vacuolar protein sorting 25 (yeast)                                                      | Vps25                               |  |
| 1428622_at   | 0.82827 | DEP domain containing 6                                                                  | Depdc6                              |  |
| 1428623_at   | 0.94232 | plexin A1                                                                                | Plxna1                              |  |
| 1428624_at   | 1.03348 | RIKEN cDNA 2810482I07 gene                                                               | 2810482I07Rik                       |  |
| 1428625_a_at | 0.99543 | "RMI1, RecQ mediated genome instability 1, homolog (S. cerevisiae)"                      | Rmi1                                |  |
| 1428626_at   | 0.99710 | "LysM, putative peptidoglycan-binding, domain containing 2"                              | Lysmd2                              |  |
| 1428627_at   | 0.97980 | zinc finger protein 509                                                                  | Zfp509                              |  |
| 1428628_at   | 1.00864 | RIKEN cDNA 1190002A17 gene                                                               | 1190002A17Rik                       |  |
| 1428629_at   | 0.95503 | zinc finger protein 518                                                                  | Zfp518                              |  |
| 1428630_x_at | 1.16076 | hydroxyacylglutathione hydrolase-like                                                    | Haghl                               |  |
| 1428631_a_at | 0.99822 | ubiquinol cytochrome c reductase core protein 2                                          | Uqcrc2                              |  |
| 1428632_at   | 0.95930 | RIKEN cDNA 1810006K21 gene                                                               | 1810006K21Rik                       |  |
| 1428633_at   | 1.14382 | TWIST neighbor /// similar to TWIST neighbor /// similar to TWIST neighbor               | Twistnb /// LOC627278 /// LOC667501 |  |
| 1428634_at   | 1.00582 | TWIST neighbor                                                                           | Twistnb                             |  |
| 1428635_at   | 1.09829 | catechol-O-methyltransferase domain containing 1                                         | Comtd1                              |  |
| 1428636_at   | 1.12143 | six transmembrane epithelial antigen of prostate 2                                       | Steap2                              |  |
| 1428637_at   | 1.05374 | dual-specificity tyrosine-(Y)-phosphorylation regulated kinase 2                         | Dyrk2                               |  |
| 1428638_at   | 1.00809 | EF-hand domain (C-terminal) containing 2                                                 | Efhc2                               |  |
| 1428639_at   | 1.00066 | lin-9 homolog (C. elegans)                                                               | Lin9                                |  |
| 1428640_at   | 1.03158 | heat shock transcription factor 2 binding protein                                        | Hsf2bp                              |  |
| 1428641_at   | 0.87880 | heat shock transcription factor 2 binding protein                                        | Hsf2bp                              |  |
| 1428642_at   | 1.06409 | "solute carrier family 35, member D3"                                                    | Slc35d3                             |  |
| 1428643_at   | 0.79354 | mannoside acetylglucosaminyltransferase 5                                                | Mgat5                               |  |
| 1428644_at   | 1.02347 | mannoside acetylglucosaminyltransferase 5                                                | Mgat5                               |  |
| 1428645_at   | 0.96471 | "guanine nucleotide binding protein, alpha inhibiting 3"                                 | Gnai3                               |  |
| 1428646_at   | 0.82543 | region containing RIKEN cDNA 2310056B04 gene; pre B-cell leukemia transcription factor 1 | LOC676870                           |  |
| 1428647_at   | 0.80128 | region containing RIKEN cDNA 2310056B04 gene; pre B-cell leukemia transcription factor 1 | LOC676870                           |  |

1428648\_at 1.07468 cullin associated and neddylation disassociated 1 Cand1  
1428649\_at 1.01751 cullin associated and neddylation disassociated 1 Cand1  
1428650\_at 0.67816 tensin 1 Tns1  
1428651\_at 0.81792 kelch-like 24 (Drosophila) Klh24  
1428652\_at 0.95365 RIKEN cDNA 0610010F05 gene 0610010F05Rik  
1428653\_x\_at 0.91344 "ELAV (embryonic lethal, abnormal vision, Drosophila)-like 1 (Hu antigen R)" Elavl1  
1428654\_at 0.88774 RIKEN cDNA 1200016B10 gene 1200016B10Rik  
1428655\_at 1.03039 RIKEN cDNA 1110018J12 gene 1110018J12Rik  
1428656\_at 1.03005 "ribonuclease III, nuclear" Rnasen  
1428657\_at 0.87457 ras responsive element binding protein 1 Rreb1  
1428658\_at 0.98894 "protein (peptidyl-prolyl cis/trans isomerase) NIMA-interacting, 4 (parvulin) /// similar to Peptidyl-prolyl cis-trans isomerase NIMA-interacting 4 (Rotamase Pin4) (PPIase Pin4) /// similar to Peptidyl-prolyl cis-trans isomerase NIMA-interacting 4 (Rotamase Pin4) (PPIase Pin4)" Pin4 /// LOC628161 /// LOC635999  
1428659\_at 1.05658 PHD finger protein 7 Phf7  
1428660\_s\_at 1.32230 "torsin family 3, member A" Tor3a  
1428661\_at 0.91235 nuclear factor of kappa light polypeptide gene enhancer in B-cells inhibitor-like 2 Nfkbil2  
1428662\_a\_at 0.88460 homeobox only domain Hod  
1428663\_at 0.98343 RIKEN cDNA 5133401H06 gene 5133401H06Rik  
1428664\_at 1.00903 vasoactive intestinal polypeptide Vip  
1428665\_at 1.01976 --- ---  
1428666\_at 1.09358 asparaginyl-tRNA synthetase Nars  
1428667\_at 0.85003 monoamine oxidase A Maoa  
1428668\_at 0.90808 acyl-Coenzyme A binding domain containing 3 Acbd3  
1428669\_at 1.00671 brain expressed myelocytomatosis oncogene Bmyc  
1428670\_at 1.18196 RIKEN cDNA 2610305J24 gene /// similar to melanoma antigen /// hypothetical protein LOC669436 /// hypothetical protein LOC670270 /// hypothetical protein LOC672052 /// similar to melanoma antigen /// similar to melanoma antigen 2610305J24Rik /// LOC668904 /// LOC669436 /// LOC670270 /// LOC672052 /// LOC672939 /// LOC677506  
1428671\_at 1.18346 RIKEN cDNA 2200002D01 gene 2200002D01Rik  
1428672\_at 1.11122 small nuclear ribonucleoprotein polypeptide F Snrpf  
1428673\_at 1.05387 symplekin Sympk  
1428674\_at 1.05247 PRP38 pre-mRNA processing factor 38 (yeast) domain containing B Prpf38b  
1428675\_at 0.96092 RIKEN cDNA 1110049F12 gene 1110049F12Rik  
1428676\_at 1.05786 transmembrane serine protease 6 Tmprss6  
1428677\_at 1.00773 WD repeat domain 73 Wdr73  
1428678\_s\_at 1.06122 WD repeat domain 73 Wdr73  
1428679\_s\_at 1.08386 RIKEN cDNA 0610010K14 gene 0610010K14Rik  
1428680\_at 1.07387 CDP-diacylglycerol synthase 1 Cds1  
1428681\_at 0.97889 "gene model 608, (NCBI)" Gm608  
1428682\_at 0.72193 zinc finger CCCH type containing 6 Zc3h6

1428683\_at 1.02006 RIKEN cDNA A930016P21 gene A930016P21Rik  
1428684\_at 1.08790 RIKEN cDNA 1500001M20 gene 1500001M20Rik  
1428685\_at 1.03270 synaptonemal complex central element protein 1 Syce1  
1428686\_at 1.04009 RIKEN cDNA 2810029C07 gene 2810029C07Rik  
1428687\_at 0.97321 zinc finger protein 687 Zfp687  
1428688\_at 1.16371 programmed cell death protein 11 Pcd11  
1428689\_at 1.01824 trypsin domain containing 1 Tysnd1  
1428690\_at 1.06391 trypsin domain containing 1 Tysnd1  
1428691\_at 1.01413 RIKEN cDNA 5630401D06 gene 5630401D06Rik  
1428692\_at 0.81908 HD domain containing 3 Hddc3  
1428693\_at 0.85209 RIKEN cDNA 2610044O15 gene 2610044O15Rik  
1428694\_at 1.16331 RIKEN cDNA 5033413D16 gene 5033413D16Rik  
1428695\_at 1.01648 RIKEN cDNA 2310014G06 gene 2310014G06Rik  
1428696\_at 1.04530 RIKEN cDNA 2310015N21 gene 2310015N21Rik  
1428697\_at 0.89986 dipeptidylpeptidase 8 Dpp8  
1428698\_at 0.88098 RIKEN cDNA 2310004I03 gene 2310004I03Rik  
1428699\_at 1.17251 spermine synthase Sms  
1428700\_at 0.95299 "purinergic receptor P2Y, G-protein coupled 13" P2ry13  
1428701\_at 1.00168 poliovirus receptor-related 4 Pvr14  
1428702\_at 1.07215 DEAD (Asp-Glu-Ala-Asp) box polypeptide 28 Ddx28  
1428703\_at 0.95494 RIKEN cDNA 1700012B07 gene 1700012B07Rik  
1428704\_at 1.08384 zinc finger protein 661 Zfp661  
1428705\_at 1.05195 RIKEN cDNA 1700007K13 gene 1700007K13Rik  
1428706\_at 0.97035 proline-rich polypeptide 6 Prr6  
1428707\_at 0.85889 parathymosin Ptms  
1428708\_x\_at 0.87699 parathymosin Ptms  
1428709\_a\_at 1.08377 mitochondrial ribosomal protein L24 Mrpl24  
1428710\_at 0.85109 Ras-like without CAAX 1 Rit1  
1428711\_at 1.07931 MON1 homolog b (yeast) Mon1b  
1428712\_at 1.04565 MON1 homolog b (yeast) Mon1b  
1428713\_s\_at 0.99936 RIKEN cDNA 4833427B12 gene 4833427B12Rik  
1428714\_at 0.96718 progesterone receptor membrane component 2 Pgrmc2  
1428715\_at 1.00424 RIKEN cDNA 2810423A18 gene 2810423A18Rik  
1428716\_at 0.96862 peroxisome biogenesis factor 1 Pex1  
1428717\_at 1.17938 secernin 1 Scrn1  
1428718\_at 1.13826 secernin 1 Scrn1  
1428719\_at 0.92198 RIKEN cDNA 2010309G21 gene /// hypothetical protein LOC207685  
2010309G21Rik /// LOC207685  
1428720\_s\_at 0.96657 "immunoglobulin lambda chain, variable 1 /// RIKEN cDNA 2010309G21  
gene /// hypothetical protein LOC207685 /// similar to Ig lambda-3 chain C region - mouse" Igl-V1 ///  
2010309G21Rik /// LOC207685 /// LOC386520  
1428721\_at 1.01964 BTB (POZ) domain containing 5 Btbd5  
1428722\_at 0.96187 "creatine kinase, mitochondrial 2" Ckmt2

1428723\_at 1.10196 RIKEN cDNA 2310047M10 gene 2310047M10Rik  
1428724\_at 0.78555 cleavage and polyadenylation factor subunit homolog (*S. cerevisiae*) Pcf11  
1428725\_at 0.93516 protein inhibitor of activated STAT 2 Pias2  
1428726\_at 1.01473 THUMP domain containing 2 Thumpd2  
1428727\_at 1.10972 RIKEN cDNA 4631422C13 gene 4631422C13Rik  
1428728\_at 0.97566 DEAD (Asp-Glu-Ala-Asp) box polypeptide 51 Ddx51  
1428729\_at 1.10953 "KRIT1, ankyrin repeat containing" Krit1  
1428730\_at 1.10741 "KRIT1, ankyrin repeat containing" Krit1  
1428731\_at 0.98124 ubiquitin specific peptidase 54 Usp54  
1428732\_at 0.99656 RIKEN cDNA 1700008J07 gene 1700008J07Rik  
1428733\_at 1.02261 "guanine nucleotide binding protein (G protein), gamma transducing activity polypeptide 2" Gngt2  
1428734\_at 0.80122 RIKEN cDNA 3200002M19 gene 3200002M19Rik  
1428735\_at 0.99804 CD69 antigen Cd69  
1428736\_at 0.86050 GRAM domain containing 3 Gramd3  
1428737\_s\_at 0.81832 GRAM domain containing 3 Gramd3  
1428738\_a\_at 0.97348 "DNA segment, Chr 14, ERATO Doi 449, expressed" D14Ertd449e  
1428739\_at 0.96457 RIKEN cDNA 2310040A07 gene 2310040A07Rik  
1428740\_a\_at 0.75868 "phosphatidylinositol glycan anchor biosynthesis, class T" Pigt  
1428741\_at 0.97384 "ELAV (embryonic lethal, abnormal vision, *Drosophila*)-like 4 (Hu antigen D)" Elavl4  
1428742\_at 1.02767 F-box protein 45 Fbxo45  
1428743\_at 0.92732 Bri3 binding protein Bri3bp  
1428744\_s\_at 0.97912 Bri3 binding protein Bri3bp  
1428745\_a\_at 0.92192 RIKEN cDNA 2310003L22 gene 2310003L22Rik  
1428746\_a\_at 1.06453 tRNA selenocysteine associated protein 1 Trspap1  
1428747\_at 1.00315 tRNA selenocysteine associated protein 1 Trspap1  
1428748\_at 1.45079 RIKEN cDNA 5830428H23 gene 5830428H23Rik  
1428749\_at 1.09155 Dmx-like 2 Dmxl2  
1428750\_at 1.11431 CDC42 effector protein (Rho GTPase binding) 2 Cdc42ep2  
1428751\_at 0.95701 Park2 co-regulated Pacrg  
1428752\_at 0.98746 "solute carrier family 5 (sodium/glucose cotransporter), member 11" Slc5a11  
1428753\_a\_at 1.01317 DiGeorge syndrome critical region gene 6 Dgcr6  
1428754\_at 1.12452 RIKEN cDNA 3300001M20 gene 3300001M20Rik  
1428755\_at 1.03452 cAMP responsive element binding protein 1 Creb1  
1428756\_at 0.96229 aminoadipate-semialdehyde dehydrogenase-phosphopantetheinyl transferase Aasdhppt  
1428757\_at 1.01508 aminoadipate-semialdehyde dehydrogenase-phosphopantetheinyl transferase Aasdhppt  
1428758\_at 0.69435 transmembrane protein 86A Tmem86a  
1428759\_s\_at 0.81182 coiled-coil domain containing 49 Ccdc49  
1428760\_at 1.05378 "small nuclear RNA activating complex, polypeptide 3" Snapc3  
1428761\_a\_at 1.25152 "small nuclear RNA activating complex, polypeptide 3" Snapc3

|              |         |                                                                              |               |
|--------------|---------|------------------------------------------------------------------------------|---------------|
| 1428762_at   | 0.86223 | mitogen-activated protein kinase kinase kinase 7 interacting protein 3       |               |
| Map3k7ip3    |         |                                                                              |               |
| 1428763_at   | 1.06738 | single-strand selective monofunctional uracil DNA glycosylase                | Smug1         |
| 1428764_at   | 1.06798 | "GTL2, imprinted maternally expressed untranslated mRNA"                     | Gtl2          |
| 1428765_at   | 1.04266 | "GTL2, imprinted maternally expressed untranslated mRNA"                     | Gtl2          |
| 1428766_at   | 0.99298 | RNA methyltransferase like 1                                                 | Rnmtl1        |
| 1428767_at   | 1.20188 | gasdermin domain containing 1                                                | Gsdmdc1       |
| 1428768_at   | 0.97855 | PAN3 polyA specific ribonuclease subunit homolog (S. cerevisiae)             | Pan3          |
| 1428769_at   | 1.01010 | TatD DNase domain containing 3                                               | Tatdn3        |
| 1428770_at   | 0.98993 | DIP2 disco-interacting protein 2 homolog A (Drosophila)                      | Dip2a         |
| 1428771_at   | 0.87863 | RIKEN cDNA 2410127E18 gene                                                   | 2410127E18Rik |
| 1428772_at   | 1.25137 | "exportin, tRNA (nuclear export receptor for tRNAs)"                         | Xpot          |
| 1428773_s_at | 0.79492 | Bcl6 interacting corepressor                                                 | Bcor          |
| 1428774_at   | 0.71097 | glypican 6                                                                   | Gpc6          |
| 1428775_at   | 1.01956 | RIKEN cDNA 1110008L16 gene                                                   | 1110008L16Rik |
| 1428776_at   | 0.95346 | "solute carrier family 10 (sodium/bile acid cotransporter family), member 6" |               |
| Slc10a6      |         |                                                                              |               |
| 1428777_at   | 1.09295 | "sprouty protein with EVH-1 domain 1, related sequence"                      | Spred1        |
| 1428778_at   | 1.11421 | "Sfi1 homolog, spindle assembly associated (yeast)"                          | Sfi1          |
| 1428779_at   | 0.79844 | zinc finger and BTB domain containing 41 homolog                             | Zbtb41        |
| 1428780_at   | 0.98981 | threonine aldolase 1                                                         | Tha1          |
| 1428781_at   | 0.97241 | dermokine                                                                    | Dmkn          |
| 1428782_a_at | 0.98269 | ubiquinol-cytochrome c reductase core protein 1                              | Uqcrc1        |
| 1428783_at   | 0.95531 | "protein kinase, cAMP dependent regulatory, type II alpha"                   | Prkar2a       |
| 1428784_at   | 1.06156 | Gem-interacting protein                                                      | Gmip          |
| 1428785_at   | 1.06983 | angiomin-like 1                                                              | Amotl1        |
| 1428786_at   | 0.93677 | NCK associated protein 1 like                                                | Nckap11       |
| 1428787_at   | 1.03314 | NCK associated protein 1 like                                                | Nckap11       |
| 1428788_at   | 1.39226 | RIKEN cDNA 1700012G19 gene                                                   | 1700012G19Rik |
| 1428789_at   | 1.05814 | Ral GEF with PH domain and SH3 binding motif 2                               | Ralgps2       |
| 1428790_at   | 0.95135 | Nfat activating molecule with ITAM motif 1                                   | Nfam1         |
| 1428791_at   | 0.82891 | ubiquitin-conjugating enzyme E2H                                             | Ube2h         |
| 1428792_at   | 1.19973 | breast carcinoma amplified sequence 1                                        | Bcas1         |
| 1428793_at   | 1.05234 | "solute carrier family 36 (proton/amino acid symporter), member 1"           | Slc36a1       |
| 1428794_at   | 1.07697 | spectrin domain with coiled-coils 1                                          | Specc1        |
| 1428795_at   | 0.76483 | RIKEN cDNA 1110021L09 gene                                                   | 1110021L09Rik |
| 1428796_at   | 0.95685 | RIKEN cDNA 5530401J07 gene                                                   | 5530401J07Rik |
| 1428797_at   | 1.01621 | RIKEN cDNA 0610039J04 gene                                                   | 0610039J04Rik |
| 1428798_s_at | 1.06572 | RIKEN cDNA 0610039J04 gene                                                   | 0610039J04Rik |
| 1428799_at   | 1.06038 | RIKEN cDNA 4930431B11 gene                                                   | 4930431B11Rik |
| 1428800_a_at | 0.93186 | pseudouridylate synthase 7 homolog (S. cerevisiae)-like                      | Pus7l         |
| 1428801_at   | 1.04633 | mannoside acetylglucosaminyltransferase 3                                    | Mgat3         |
| 1428802_at   | 0.90132 | mannoside acetylglucosaminyltransferase 3                                    | Mgat3         |

1428803\_at 1.01418 RIKEN cDNA 4632408A20 gene 4632408A20Rik  
1428804\_at 1.14003 microfibrillar-associated protein 3-like Mfap3l  
1428805\_at 1.02555 "solute carrier family 35, member E3" Slc35e3  
1428806\_at 1.03691 "casein kinase 1, gamma 1" Csnk1g1  
1428807\_at 1.07465 RIKEN cDNA 4932702K14 gene 4932702K14Rik  
1428808\_at 0.99715 prickle-like 2 (Drosophila) Prickle2  
1428809\_at 0.97045 RIKEN cDNA 1810010H24 gene /// hypothetical protein LOC671668 ///  
hypothetical protein LOC674875 1810010H24Rik /// LOC671668 /// LOC674875  
1428810\_at 1.02299 RIKEN cDNA 2700097O09 gene 2700097O09Rik  
1428811\_at 1.13924 "WAP, follistatin/kazal, immunoglobulin, kunitz and netrin domain containing  
2" Wfikkn2  
1428812\_at 0.93733 RIKEN cDNA 1700040L02 gene 1700040L02Rik  
1428813\_a\_at 0.92768 dopamine receptor D1 interacting protein Drd1ip  
1428814\_at 1.10496 --- ---  
1428815\_at 1.09223 RIKEN cDNA 4930583C14 gene 4930583C14Rik  
1428816\_a\_at 0.92775 GATA binding protein 2 Gata2  
1428817\_at 0.89780 MON2 homolog (yeast) Mon2  
1428818\_at 0.86584 MON2 homolog (yeast) Mon2  
1428819\_at 1.20750 "microtubule-associated protein, RP/EB family, member 1" Mapre1  
1428820\_at 1.39067 "microtubule-associated protein, RP/EB family, member 1" Mapre1  
1428821\_at 0.95688 "1-acylglycerol-3-phosphate O-acyltransferase 2 (lysophosphatidic acid  
acyltransferase, beta)" Agpat2  
1428822\_a\_at 0.81242 sorting nexin 24 Snx24  
1428823\_at 1.26503 HD domain containing 2 Hddc2  
1428824\_at 1.01173 RIKEN cDNA 2310003C23 gene 2310003C23Rik  
1428825\_at 1.05460 "nuclear receptor subfamily 6, group A, member 1" Nr6a1  
1428826\_at 1.19379 "nuclear receptor subfamily 6, group A, member 1" Nr6a1  
1428827\_at 1.01352 Wolf-Hirschhorn syndrome candidate 1 (human) Whsc1  
1428828\_at 1.04850 RPA interacting protein Rpain  
1428829\_at 1.00240 RIKEN cDNA 6820401H01 gene 6820401H01Rik  
1428830\_at 1.28233 ataxia telangiectasia mutated homolog (human) Atm  
1428831\_at 1.03151 RIKEN cDNA 6230429P13 gene 6230429P13Rik  
1428832\_at 0.98202 RIKEN cDNA 1600002H07 gene 1600002H07Rik  
1428833\_at 0.95266 RIKEN cDNA 4930406D14 gene 4930406D14Rik  
1428834\_at 1.44978 dual specificity phosphatase 4 Dusp4  
1428835\_at 0.84320 "myosin, heavy polypeptide 14 /// similar to nonmuscle myosin heavy chain"  
Myh14 /// LOC672865  
1428836\_at 0.92051 RIKEN cDNA 2300009A05 gene 2300009A05Rik  
1428837\_at 1.00437 kelch-like 14 (Drosophila) Kllh14  
1428838\_a\_at 0.94842 deoxycytidine kinase Dck  
1428839\_at 1.08279 WD repeat domain 53 Wdr53  
1428840\_s\_at 1.01048 WD repeat domain 53 Wdr53  
1428841\_at 0.85706 vitelliform macular dystrophy 2 homolog (human) Vmd2

1428842\_a\_at 0.99996 nerve growth factor receptor (TNFRSF16) associated protein 1 Ngfrap1  
 1428843\_at 0.96488 membrane-associated ring finger (C3HC4) 5 5-Mar  
 1428844\_a\_at 1.04582 BCL2-associated transcription factor 1 Bclaf1  
 1428845\_at 1.01476 BCL2-associated transcription factor 1 Bclaf1  
 1428846\_at 0.96932 tetratricopeptide repeat domain 14 Ttc14  
 1428847\_a\_at 0.94563 microtubule-actin crosslinking factor 1 Macf1  
 1428848\_a\_at 1.04376 microtubule-actin crosslinking factor 1 Macf1  
 1428849\_at 0.95483 "ribosomal protein S6 kinase, polypeptide 1" Rps6kb1  
 1428850\_x\_at 0.94047 CD99 antigen Cd99  
 1428851\_at 1.02285 RIKEN cDNA 1300014I06 gene 1300014I06Rik  
 1428852\_at 0.86390 dedicator of cyto-kinesis 3 Dock3  
 1428853\_at 0.88381 patched homolog 1 Ptch1  
 1428854\_at 0.91608 transmembrane emp24 domain containing 8 Tmed8  
 1428855\_at 1.09333 histocompatibility 13 H13  
 1428856\_at 1.00596 Histocompatibility 13 H13  
 1428857\_at 0.90638 "Sin3A associated protein, 130kDa" Sap130  
 1428858\_at 0.95061 WD repeat domain 70 Wdr70  
 1428859\_at 0.98922 polyamine oxidase (exo-N4-amino) Paox  
 1428860\_at 0.90646 RIKEN cDNA 4930572J05 gene 4930572J05Rik  
 1428861\_at 0.88450 RIKEN cDNA 4631422O05 gene /// similar to downregulated in ovarian cancer  
 1 isoform 2 /// similar to downregulated in ovarian cancer 1 isoform 2 4631422O05Rik ///  
 LOC667770 /// LOC676704  
 1428862\_at 0.93873 tetratricopeptide repeat domain 17 Ttc17  
 1428863\_at 0.92255 ankyrin repeat domain 39 Ankrd39  
 1428864\_at 0.98689 RIKEN cDNA 5530400B01 gene 5530400B01Rik  
 1428865\_at 0.99106 BCL2-like 12 (proline rich) Bcl2l12  
 1428866\_at 0.97783 RIKEN cDNA 2810037O22 gene 2810037O22Rik  
 1428867\_at 0.88386 RIKEN cDNA 4933417E01 gene 4933417E01Rik  
 1428868\_a\_at 1.08680 ornithine decarboxylase antizyme Oaz1  
 1428869\_at 1.33253 nucleolar and coiled-body phosphoprotein 1 Nolc1  
 1428870\_at 1.12587 nucleolar and coiled-body phosphoprotein 1 Nolc1  
 1428871\_at 1.07591 RIKEN cDNA 4121402D02 gene 4121402D02Rik  
 1428872\_at 1.01966 RIKEN cDNA 4121402D02 gene 4121402D02Rik  
 1428873\_a\_at 1.07086 RIKEN cDNA 4121402D02 gene 4121402D02Rik  
 1428874\_at 1.01695 RIKEN cDNA 1110019N10 gene 1110019N10Rik  
 1428875\_at 0.93434 golgi phosphoprotein 4 Golph4  
 1428876\_at 0.99465 signal recognition particle 72 Srp72  
 1428877\_at 0.97906 signal recognition particle 72 Srp72  
 1428878\_a\_at 0.90081 "phosphatidylinositol transfer protein, cytoplasmic 1" Pitpnc1  
 1428879\_at 0.88459 "phosphatidylinositol transfer protein, cytoplasmic 1" Pitpnc1  
 1428880\_at 1.04140 RIKEN cDNA 0610038F07 gene 0610038F07Rik  
 1428881\_at 1.09869 kinesin 2 Kns2  
 1428882\_at 1.09139 "WD repeat domain, phosphoinositide interacting 2" Wipi2



|              |         |                                                                                   |               |
|--------------|---------|-----------------------------------------------------------------------------------|---------------|
| 1428883_at   | 0.84966 | transmembrane protein 57                                                          | Tmem57        |
| 1428884_at   | 0.99652 | transmembrane protein 57                                                          | Tmem57        |
| 1428885_at   | 1.12600 | arylformamidase                                                                   | Afmid         |
| 1428886_at   | 1.05705 | retinoblastoma binding protein 5                                                  | Rbbp5         |
| 1428887_at   | 0.87831 | RIKEN cDNA 2610020C11 gene                                                        | 2610020C11Rik |
| 1428888_at   | 0.96170 | transmembrane protein 33                                                          | Tmem33        |
| 1428889_at   | 1.00768 | "alkB, alkylation repair homolog 3 (E. coli)"                                     | Alkbh3        |
| 1428890_at   | 0.93278 | fem-1 homolog c (C.elegans)                                                       | Fem1c         |
| 1428891_at   | 0.84003 | ---                                                                               | ---           |
| 1428892_at   | 1.04396 | peptidylprolyl isomerase (cyclophilin)-like 1                                     | Ppil1         |
| 1428893_at   | 1.04611 | oxysterol binding protein-like 7                                                  | Osbp17        |
| 1428894_at   | 1.00357 | RIKEN cDNA 1300018J18 gene                                                        | 1300018J18Rik |
| 1428895_at   | 1.03602 | RIKEN cDNA 3222401M22 gene                                                        | 3222401M22Rik |
| 1428896_at   | 0.95677 | platelet-derived growth factor receptor-like                                      | Pdgfrl        |
| 1428897_at   | 1.11477 | RIKEN cDNA 2610029I01 gene                                                        | 2610029I01Rik |
| 1428898_at   | 0.82971 | MON1 homolog A (yeast)                                                            | Mon1a         |
| 1428899_at   | 1.04926 | RIKEN cDNA 2310079P10 gene                                                        | 2310079P10Rik |
| 1428900_s_at | 0.74197 | methyltransferase 5 domain containing 1                                           | Mett5d1       |
| 1428901_at   | 1.06758 | DTW domain containing 2                                                           | Dtwd2         |
| 1428902_at   | 1.00196 | carbohydrate sulfotransferase 11                                                  | Chst11        |
| 1428903_at   | 1.03395 | RIKEN cDNA 3110037I16 gene                                                        | 3110037I16Rik |
| 1428904_at   | 1.16784 | RIKEN cDNA E230022H04 gene                                                        | E230022H04Rik |
| 1428905_at   | 1.04374 | Ras-related GTP binding A                                                         | Rraga         |
| 1428906_at   | 1.02622 | "general transcription factor IIH, polypeptide 5"                                 | Gtf2h5        |
| 1428907_at   | 1.12092 | RIKEN cDNA 2600011C06 gene                                                        | 2600011C06Rik |
| 1428908_at   | 1.20614 | RIKEN cDNA 2600011C06 gene                                                        | 2600011C06Rik |
| 1428909_at   | 1.95939 | RIKEN cDNA A130040M12 gene                                                        | A130040M12Rik |
| 1428910_at   | 0.98378 | RIKEN cDNA 2310022B05 gene                                                        | 2310022B05Rik |
| 1428911_at   | 1.02382 | "tubulin tyrosine ligase-like family, member 4"                                   | Ttll4         |
| 1428912_at   | 0.96842 | "tubulin tyrosine ligase-like family, member 4"                                   | Ttll4         |
| 1428913_at   | 1.04564 | "DNA segment, Chr 2, Brigham & Women's Genetics 1335 expressed"                   | D2Bwg1335e    |
| 1428914_at   | 0.81796 | RIKEN cDNA 2310014D11 gene                                                        | 2310014D11Rik |
| 1428915_at   | 0.87845 | sirtuin 5 (silent mating type information regulation 2 homolog) 5 (S. cerevisiae) | Sirt5         |
| 1428916_s_at | 0.87657 | sirtuin 5 (silent mating type information regulation 2 homolog) 5 (S. cerevisiae) | Sirt5         |
| 1428917_at   | 0.83939 | syntaxin 17                                                                       | Stx17         |
| 1428918_at   | 1.04826 | SCY1-like 3 (S. cerevisiae)                                                       | Scyl3         |
| 1428919_at   | 1.39676 | Fgfr1 oncogene partner                                                            | Fgfr1op       |
| 1428920_at   | 1.37494 | ---                                                                               | ---           |
| 1428921_at   | 1.15070 | RIKEN cDNA 2810021B07 gene                                                        | 2810021B07Rik |
| 1428922_at   | 1.30324 | RIKEN cDNA 1200009O22 gene                                                        | 1200009O22Rik |

|              |         |                                                                                                      |               |
|--------------|---------|------------------------------------------------------------------------------------------------------|---------------|
| 1428923_at   | 0.97446 | "protein phosphatase 1, regulatory (inhibitor) subunit 3G"                                           | Ppp1r3g       |
| 1428924_at   | 0.89816 | molybdenum cofactor synthesis 3                                                                      | Mocs3         |
| 1428925_at   | 0.91759 | SUMO1/sentrin specific peptidase 1                                                                   | Senp1         |
| 1428926_at   | 0.83753 | RIKEN cDNA 1110003O08 gene                                                                           | 1110003O08Rik |
| 1428927_at   | 1.06331 | SHQ1 homolog ( <i>S. cerevisiae</i> )                                                                | Shq1          |
| 1428928_at   | 0.83207 | "calcium channel, voltage-dependent, beta 4 subunit"                                                 | Cacnb4        |
| 1428929_s_at | 0.87453 | "solute carrier family 25 (mitochondrial carrier, phosphate carrier), member 26"                     | Slc25a26      |
| 1428930_at   | 0.89958 | transmembrane protein 29                                                                             | Tmem29        |
| 1428931_a_at | 0.92973 | "poly (ADP-ribose) polymerase family, member 6"                                                      | Parp6         |
| 1428932_at   | 1.07160 | tetratricopeptide repeat domain 21A                                                                  | ttc21a        |
| 1428933_at   | 1.03341 | histone deacetylase 8                                                                                | Hdac8         |
| 1428934_at   | 0.94190 | CKLF-like MARVEL transmembrane domain containing 2B                                                  | Cmtm2b        |
| 1428935_at   | 0.88808 | calnexin                                                                                             | Canx          |
| 1428936_at   | 1.20390 | "ATPase, Ca <sup>++</sup> transporting, plasma membrane 1"                                           | Atp2b1        |
| 1428937_at   | 1.07929 | "ATPase, Ca <sup>++</sup> transporting, plasma membrane 1"                                           | Atp2b1        |
| 1428938_at   | 0.98224 | "guanine nucleotide binding protein, alpha q polypeptide"                                            | Gnaq          |
| 1428939_s_at | 0.95041 | "guanine nucleotide binding protein, alpha q polypeptide"                                            | Gnaq          |
| 1428940_at   | 1.03678 | "guanine nucleotide binding protein, alpha q polypeptide"                                            | Gnaq          |
| 1428941_at   | 0.73037 | "zinc finger, MYM-type 2"                                                                            | Zmym2         |
| 1428942_at   | 0.90220 | metallothionein 2                                                                                    | Mt2           |
| 1428943_at   | 1.12441 | nudix (nucleoside diphosphate linked moiety X)-type motif 13                                         | Nudt13        |
| 1428944_at   | 1.03719 | ubiquitin-activating enzyme E1-like 2                                                                | Ube1l2        |
| 1428945_at   | 1.06608 | ubiquitin-activating enzyme E1-like 2                                                                | Ube1l2        |
| 1428946_at   | 1.02692 | ubiquitin-activating enzyme E1-like 2                                                                | Ube1l2        |
| 1428947_at   | 1.07471 | RIKEN cDNA 2010001M09 gene                                                                           | 2010001M09Rik |
| 1428948_at   | 0.93078 | RIKEN cDNA 5730414M22 gene                                                                           | 5730414M22Rik |
| 1428949_at   | 1.12572 | "exportin, tRNA (nuclear export receptor for tRNAs)"                                                 | Xpot          |
| 1428950_s_at | 1.18105 | nucleolar protein 8                                                                                  | Nol8          |
| 1428951_at   | 1.20096 | nucleolar protein 8                                                                                  | Nol8          |
| 1428952_at   | 1.04919 | protein disulfide isomerase associated 2                                                             | Pdia2         |
| 1428953_at   | 0.96357 | OTU domain containing 7B                                                                             | Otud7b        |
| 1428954_at   | 0.95845 | "solute carrier family 9 (sodium/hydrogen exchanger), isoform 3 regulator 2"                         | Slc9a3r2      |
| 1428955_x_at | 0.91705 | "solute carrier family 9 (sodium/hydrogen exchanger), isoform 3 regulator 2"                         | Slc9a3r2      |
| 1428956_at   | 0.89368 | RIKEN cDNA 2300008B03 gene                                                                           | 2300008B03Rik |
| 1428957_at   | 1.06419 | RIKEN cDNA 2300008B03 gene                                                                           | 2300008B03Rik |
| 1428958_at   | 0.80629 | progesterin and adipoQ receptor family member VIII                                                   | Paqr8         |
| 1428959_at   | 1.00654 | RIKEN cDNA 5830405N20 gene                                                                           | 5830405N20Rik |
| 1428960_at   | 0.82082 | RIKEN cDNA 4933434I06 gene                                                                           | 4933434I06Rik |
| 1428961_a_at | 0.89665 | "splicing factor, arginine/serine-rich 16 (suppressor-of-white-apricot homolog, <i>Drosophila</i> )" | Sfrs16        |

|              |         |                                                                                           |               |
|--------------|---------|-------------------------------------------------------------------------------------------|---------------|
| 1428962_at   | 0.91913 | RIKEN cDNA 1700013F07 gene                                                                | 1700013F07Rik |
| 1428963_at   | 0.73194 | RWD domain containing 2                                                                   | Rwdd2         |
| 1428964_at   | 0.95073 | "solute carrier family 25 (mitochondrial carrier), member 18"                             | Slc25a18      |
| 1428965_at   | 0.99905 | coiled-coil domain containing 54                                                          | Ccdc54        |
| 1428966_at   | 0.99695 | RIKEN cDNA 2610204K14 gene                                                                | 2610204K14Rik |
| 1428967_at   | 0.95123 | insulin-like growth factor I receptor                                                     | Igflr         |
| 1428968_at   | 1.02204 | centrosomal protein 57                                                                    | Cep57         |
| 1428969_at   | 0.97311 | RIKEN cDNA D030074E01 gene                                                                | D030074E01Rik |
| 1428970_at   | 1.02493 | N-acetyltransferase 13                                                                    | Nat13         |
| 1428971_at   | 0.98054 | RIKEN cDNA 5730405I09 gene                                                                | 5730405I09Rik |
| 1428972_at   | 1.13631 | RIKEN cDNA 0610012D17 gene                                                                | 0610012D17Rik |
| 1428973_s_at | 1.18917 | RIKEN cDNA 0610012D17 gene                                                                | 0610012D17Rik |
| 1428974_s_at | 0.85293 | leucine zipper transcription factor-like 1                                                | Lztfl1        |
| 1428975_at   | 1.02739 | sushi domain containing 3                                                                 | Susd3         |
| 1428976_at   | 0.91063 | thymopoietin                                                                              | Tmpo          |
| 1428977_at   | 0.56866 | carbohydrate (N-acetylgalactosamine 4-0) sulfotransferase 8                               | Chst8         |
| 1428978_at   | 0.90384 | RIKEN cDNA 2900009J20 gene                                                                | 2900009J20Rik |
| 1428979_at   | 0.98480 | metal response element binding transcription factor 1                                     | Mtf1          |
| 1428980_at   | 0.99270 | RIKEN cDNA 1110001M24 gene                                                                | 1110001M24Rik |
| 1428981_at   | 1.09388 | RIKEN cDNA 2810007J24 gene                                                                | 2810007J24Rik |
| 1428982_at   | 1.02548 | RIKEN cDNA D530031C13 gene                                                                | D530031C13Rik |
| 1428983_at   | 0.85450 | scleraxis                                                                                 | Scx           |
| 1428984_a_at | 0.91461 | RIKEN cDNA 1700012B09 gene                                                                | 1700012B09Rik |
| 1428985_at   | 0.75797 | integrator complex subunit 12                                                             | Ints12        |
| 1428986_at   | 0.80226 | "solute carrier family 17 (sodium-dependent inorganic phosphate cotransporter), member 7" | Slc17a7       |
| 1428987_at   | 0.83829 | dynein light chain roadblock-type 2                                                       | Dynlrb2       |
| 1428988_at   | 1.14673 | "ATP-binding cassette, sub-family C (CFTR/MRP), member 3"                                 | Abcc3         |
| 1428989_at   | 0.90636 | RIKEN cDNA 0710001D07 gene                                                                | 0710001D07Rik |
| 1428990_at   | 0.80122 | RIKEN cDNA 2310047K21 gene                                                                | 2310047K21Rik |
| 1428991_at   | 1.16194 | HRAS-like suppressor                                                                      | Hrasls        |
| 1428992_at   | 0.94236 | unc-13 homolog D (C. elegans)                                                             | Unc13d        |
| 1428993_at   | 0.98116 | RIKEN cDNA 1110017I16 gene                                                                | 1110017I16Rik |
| 1428994_s_at | 0.92996 | RIKEN cDNA 1110017I16 gene                                                                | 1110017I16Rik |
| 1428995_at   | 0.88430 | 5-oxoprolinase (ATP-hydrolysing)                                                          | Oplah         |
| 1428996_at   | 1.19649 | RIKEN cDNA 4833426J09 gene                                                                | 4833426J09Rik |
| 1428997_at   | 1.03415 | PHD finger protein 23                                                                     | Phf23         |
| 1428998_at   | 0.99445 | PHD finger protein 3                                                                      | Phf3          |
| 1428999_at   | 1.01385 | PHD finger protein 3                                                                      | Phf3          |
| 1429000_at   | 0.98114 | PHD finger protein 3                                                                      | Phf3          |
| 1429001_at   | 1.11974 | pirin                                                                                     | Pir           |
| 1429002_at   | 0.90993 | SNW domain containing 1                                                                   | Snw1          |
| 1429003_at   | 0.85510 | SNW domain containing 1                                                                   | Snw1          |

|              |         |                                                                               |                     |
|--------------|---------|-------------------------------------------------------------------------------|---------------------|
| 1429004_at   | 0.97286 | pleckstrin homology domain interacting protein                                | Phip                |
| 1429005_at   | 1.01813 | malignant fibrous histiocytoma amplified sequence 1                           | Mfhas1              |
| 1429006_s_at | 1.04519 | RIKEN cDNA 2610110G12 gene                                                    | 2610110G12Rik       |
| 1429007_at   | 1.10293 | "solute carrier family 35, member B2"                                         | Slc35b2             |
| 1429008_at   | 1.15016 | RIKEN cDNA 1810074P20 gene                                                    | 1810074P20Rik       |
| 1429009_at   | 1.23258 | U1 small nuclear ribonucleoprotein polypeptide A                              | Snrp70              |
| 1429010_at   | 0.97060 | U1 small nuclear ribonucleoprotein polypeptide A                              | Snrp70              |
| 1429011_x_at | 0.93595 | U1 small nuclear ribonucleoprotein polypeptide A                              | Snrp70              |
| 1429012_at   | 0.99758 | Rac/Cdc42 guanine nucleotide exchange factor (GEF) 6                          | Arhgef6             |
| 1429013_at   | 0.92710 | RIKEN cDNA 2900002G04 gene                                                    | 2900002G04Rik       |
| 1429014_at   | 0.81603 | "DNA segment, Chr 1, ERATO Doi 161, expressed"                                | D1Ert161e           |
| 1429015_at   | 0.95259 | "DNA segment, Chr 1, ERATO Doi 161, expressed"                                | D1Ert161e           |
| 1429016_at   | 0.99935 | "DNA segment, Chr 1, ERATO Doi 161, expressed /// galactosidase, beta 1-like" | D1Ert161e /// Glb1l |
| 1429017_at   | 1.04498 | "Smith-Magenis syndrome chromosome region, candidate 8 homolog (human)"       | Smcr8               |
| 1429018_at   | 1.09312 | RIKEN cDNA 3830408D24 gene                                                    | 3830408D24Rik       |
| 1429019_s_at | 0.95747 | paraoxonase 2                                                                 | Pon2                |
| 1429020_at   | 0.99326 | paraoxonase 2                                                                 | Pon2                |
| 1429021_at   | 0.87320 | Eph receptor A4                                                               | Epha4               |
| 1429022_at   | 0.99751 | adenylate cyclase activating polypeptide 1 receptor 1                         | Adcyap1r1           |
| 1429023_at   | 1.07858 | RIKEN cDNA 2900042E01 gene                                                    | 2900042E01Rik       |
| 1429024_at   | 0.86696 | RIKEN cDNA 1110018J23 gene                                                    | 1110018J23Rik       |
| 1429025_a_at | 0.75702 | hexamethylene bis-acetamide inducible 2                                       | Hexim2              |
| 1429026_at   | 0.85680 | hexamethylene bis-acetamide inducible 2                                       | Hexim2              |
| 1429027_at   | 0.89374 | RIKEN cDNA 0610007N19 gene                                                    | 0610007N19Rik       |
| 1429028_at   | 1.27003 | dedicator of cytokinesis 11                                                   | Dock11              |
| 1429029_at   | 1.03670 | RIKEN cDNA 4933405A16 gene                                                    | 4933405A16Rik       |
| 1429030_at   | 0.91115 | C1q and tumor necrosis factor related protein 7                               | C1qtnf7             |
| 1429031_at   | 0.87245 | RIKEN cDNA 4833408D11 gene                                                    | 4833408D11Rik       |
| 1429032_at   | 0.87469 | MICAL C-terminal like                                                         | Micalcl             |
| 1429033_at   | 0.75837 | golgi coiled coil 1                                                           | Gcc1                |
| 1429034_at   | 1.13538 | essential meiotic endonuclease 1 homolog 2 (S. pombe)                         | Eme2                |
| 1429035_at   | 1.01273 | dipeptidase 3                                                                 | Dpep3               |
| 1429036_at   | 0.99006 | otopetrin 3                                                                   | Otop3               |
| 1429037_at   | 0.97377 | RIKEN cDNA 1700019A02 gene                                                    | 1700019A02Rik       |
| 1429038_at   | 1.04057 | RIKEN cDNA 1500034J01 gene                                                    | 1500034J01Rik       |
| 1429039_s_at | 0.88619 | RIKEN cDNA 1500034J01 gene                                                    | 1500034J01Rik       |
| 1429040_at   | 0.93838 | RIKEN cDNA 2610005L07 gene                                                    | 2610005L07Rik       |
| 1429041_at   | 1.30826 | RIKEN cDNA 2610005L07 gene                                                    | 2610005L07Rik       |
| 1429042_at   | 0.89924 | RIKEN cDNA 2010200O16 gene                                                    | 2010200O16Rik       |
| 1429043_at   | 0.92955 | survival motor neuron domain containing 1                                     | Smndc1              |
| 1429044_at   | 0.96953 | calmodulin regulated spectrin-associated protein 1-like 1                     | Camsap111           |

1429045\_at 1.08591 SMAD specific E3 ubiquitin protein ligase 2 Smurf2  
1429046\_at 0.94159 SMAD specific E3 ubiquitin protein ligase 2 Smurf2  
1429047\_at 1.02000 "Rtf1, Paf1/RNA polymerase II complex component, homolog (S. cerevisiae)" Rtf1  
1429048\_at 1.08613 "biogenesis of lysosome-related organelles complex-1, subunit 2" Bloc1s2  
1429049\_at 0.89660 "NUAK family, SNF1-like kinase, 2" Nuak2  
1429050\_at 0.82006 cysteine-rich hydrophobic domain 2 Chic2  
1429051\_s\_at 0.86170 SRY-box containing gene 11 Sox11  
1429052\_at 0.58090 "protein tyrosine phosphatase, receptor type, D" Ptpnd  
1429053\_at 0.97146 RIKEN cDNA 1110012J17 gene 1110012J17Rik  
1429054\_at 1.09966 mitochondrial ribosomal protein L47 Mrpl47  
1429055\_at 0.94459 RIKEN cDNA 4930506M07 gene 4930506M07Rik  
1429056\_at 1.11950 NMDA receptor regulated 1-like Narg11  
1429057\_at 1.26906 NMDA receptor regulated 1-like Narg11  
1429058\_at 0.86789 RIKEN cDNA 1110004B13 gene 1110004B13Rik  
1429059\_s\_at 0.88317 RIKEN cDNA 1110004B13 gene 1110004B13Rik  
1429060\_at 1.45758 --- ---  
1429061\_at 1.11910 RIKEN cDNA 1810063B05 gene 1810063B05Rik  
1429062\_at 0.81636 kinesin family member 16B Kif16b  
1429063\_s\_at 0.86111 kinesin family member 16B Kif16b  
1429064\_at 0.91559 DIP2 disco-interacting protein 2 homolog C (Drosophila) Dip2c  
1429065\_at 0.77990 RIKEN cDNA 1200009F10 gene 1200009F10Rik  
1429066\_at 0.97748 RIKEN cDNA 4930565B19 gene 4930565B19Rik  
1429067\_at 1.00870 "calpain, small subunit 2" Capns2  
1429068\_at 0.95122 RIKEN cDNA 2810488G03 gene 2810488G03Rik  
1429069\_at 0.96610 STIP1 homology and U-Box containing protein 1 Stub1  
1429070\_at 0.91923 RIKEN cDNA 4933440H19 gene 4933440H19Rik  
1429071\_at 0.94243 "malic enzyme 3, NADP(+)-dependent, mitochondrial" Me3  
1429072\_at 0.91969 RIKEN cDNA 1110001D15 gene 1110001D15Rik  
1429073\_at 0.93222 RIKEN cDNA 2210015D19 gene 2210015D19Rik  
1429074\_at 0.95372 RIKEN cDNA 1700026D08 gene 1700026D08Rik  
1429075\_a\_at 0.97299 RIKEN cDNA 1700018B08 gene 1700018B08Rik  
1429076\_a\_at 0.96217 glycerophosphodiester phosphodiesterase domain containing 2 Gdpd2  
1429077\_x\_at 1.04409 ribosomal protein L21 /// similar to 60S ribosomal protein L21 /// similar to ribosomal protein L21 Rpl21 /// LOC433125 /// LOC434067 /// LOC545423 /// LOC635258 /// LOC636855 /// LOC639424 /// LOC674827 /// LOC675278 /// LOC676253 /// LOC676590 /// LOC676825 /// LOC676903  
1429078\_a\_at 1.20490 "COP9 (constitutive photomorphogenic) homolog, subunit 7a (Arabidopsis thaliana)" Cops7a  
1429079\_a\_at 1.09632 RIKEN cDNA 2310045N01 gene 2310045N01Rik

1429080\_at 1.08296 M-phase phosphoprotein 10 (U3 small nucleolar ribonucleoprotein) Mphosph10

1429081\_at 0.91050 GRIP and coiled-coil domain containing 2 Gcc2

1429082\_at 1.09093 "DNA segment, Chr 5, ERATO Doi 585, expressed" D5Ertd585e

1429083\_at 1.02343 "amylo-1,6-glucosidase, 4-alpha-glucanotransferase" Agl

1429084\_at 0.90791 vascular endothelial zinc finger 1 Vezf1

1429085\_at 1.00945 vascular endothelial zinc finger 1 Vezf1

1429086\_at 0.99039 grainyhead-like 2 (Drosophila) Grhl2

1429087\_at 0.85626 RIKEN cDNA 1110054O05 gene 1110054O05Rik

1429088\_at 0.68425 limb-bud and heart Lbh

1429089\_s\_at 0.90056 RIKEN cDNA 2900026A02 gene 2900026A02Rik

1429090\_at 1.07875 RIKEN cDNA A030007L17 gene A030007L17Rik

1429091\_at 0.99217 RIKEN cDNA 1600002K03 gene 1600002K03Rik

1429092\_at 1.01278 "vitamin K epoxide reductase complex, subunit 1-like 1" Vkorc111

1429093\_at 1.04039 DNA-damage inducible protein 2 Ddi2

1429094\_at 1.05585 DNA-damage inducible protein 2 Ddi2

1429095\_at 0.97945 centromere protein P Cenpp

1429096\_at 0.90969 RIKEN cDNA 2810455D13 gene 2810455D13Rik

1429097\_at 0.94566 RIKEN cDNA C030044C12 gene C030044C12Rik

1429098\_s\_at 0.89340 nonhomologous end-joining factor 1 Nhej1

1429099\_at 1.04421 RIKEN cDNA 1110051B16 gene 1110051B16Rik

1429100\_at 0.82327 RIKEN cDNA 2010109K11 gene 2010109K11Rik

1429101\_at 1.04170 gap junction membrane channel protein alpha 5 Gja5

1429102\_at 1.00333 arrestin domain containing 5 Arrdc5

1429103\_at 1.02190 translocase of outer mitochondrial membrane 22 homolog (yeast) Tomm22

1429104\_at 0.95863 LIM domain containing 2 Limd2

1429105\_at 1.03346 "discs, large (Drosophila) homolog-associated protein 1" Dlgap1

1429106\_at 1.23925 RIKEN cDNA 4921509J17 gene 4921509J17Rik

1429107\_at 1.00362 RIKEN cDNA 1110059H15 gene 1110059H15Rik

1429108\_at 0.87869 male-specific lethal 2-like 1 (Drosophila) Msl211

1429109\_at 0.96957 male-specific lethal 2-like 1 (Drosophila) Msl211

1429110\_a\_at 1.06910 "NOL1/NOP2/Sun domain family, member 4" Nsun4

1429111\_at 0.95888 talin 2 /// similar to talin 2 Tln2 /// LOC639214

1429112\_at 1.00440 talin 2 /// similar to talin 2 Tln2 /// LOC639214

1429113\_at 0.79202 RIKEN cDNA 2900092E17 gene /// RIKEN cDNA 1500031I19 gene 2900092E17Rik /// 1500031I19Rik

1429114\_at 1.00473 SEC14 and spectrin domains 1 Sestd1

1429115\_at 0.95636 RIKEN cDNA 2010003O02 gene 2010003O02Rik

1429116\_at 0.90699 "solute carrier family 17 (anion/sugar transporter), member 5" Slc17a5

1429117\_at 0.87000 TNFRSF1A-associated via death domain Tradd

1429118\_a\_at 1.02203 RIKEN cDNA 4930429M06Rik 4930429M06Rik

1429119\_at 1.01707 RIKEN cDNA 4833421E05 gene 4833421E05Rik

1429120\_at 0.87179 limb and neural patterns Lnp

|              |         |                                                                                  |               |
|--------------|---------|----------------------------------------------------------------------------------|---------------|
| 1429121_at   | 1.02643 | RIKEN cDNA 4921517N04 gene                                                       | 4921517N04Rik |
| 1429122_a_at | 0.95515 | RIKEN cDNA 1700040I03 gene                                                       | 1700040I03Rik |
| 1429123_at   | 0.89423 | "RAB27A, member RAS oncogene family"                                             | Rab27a        |
| 1429124_s_at | 1.04551 | "REX1, RNA exonuclease 1 homolog (S. cerevisiae)"                                | Rexo1         |
| 1429125_at   | 0.96106 | zinc finger and BTB domain containing 9                                          | Zbtb9         |
| 1429126_at   | 0.95414 | RIKEN cDNA 2600001M11 gene                                                       | 2600001M11Rik |
| 1429127_at   | 0.92296 | neurotrophin receptor associated death domain                                    | Nradd         |
| 1429128_x_at | 1.14779 | "nuclear factor of kappa light polypeptide gene enhancer in B-cells 2, p49/p100" | Nfkb2         |
| 1429129_at   | 0.73710 | leucine rich repeat and coiled-coil domain containing 1                          | Lrrcc1        |
| 1429130_at   | 0.98709 | tetratricopeptide repeat domain 25                                               | Ttc25         |
| 1429131_at   | 0.89897 | ubiquitin-conjugating enzyme E2 variant 2                                        | Ube2v2        |
| 1429132_at   | 0.85974 | ubiquitin-conjugating enzyme E2 variant 2                                        | Ube2v2        |
| 1429133_at   | 0.95232 | RIKEN cDNA 4930519N16 gene                                                       | 4930519N16Rik |
| 1429134_at   | 1.05249 | human immunodeficiency virus type I enhancer binding protein 3                   | Hivep3        |
| 1429135_at   | 0.89527 | RIKEN cDNA 1110059M19 gene                                                       | 1110059M19Rik |
| 1429136_at   | 0.90220 | RIKEN cDNA 1700052K11 gene                                                       | 1700052K11Rik |
| 1429137_at   | 0.97519 | RIKEN cDNA 2810422O20 gene                                                       | 2810422O20Rik |
| 1429138_at   | 0.78434 | neuronal PAS domain protein 3                                                    | Npas3         |
| 1429139_at   | 0.82850 | OTU domain containing 7B                                                         | Otud7b        |
| 1429140_at   | 1.07126 | RIKEN cDNA 9830002I17 gene                                                       | 9830002I17Rik |
| 1429141_at   | 1.05314 | neuralized-like 2 (Drosophila)                                                   | Neurl2        |
| 1429142_at   | 0.96732 | RIKEN cDNA 1700012A03 gene                                                       | 1700012A03Rik |
| 1429143_at   | 1.00473 | tektin 3                                                                         | Tekt3         |
| 1429144_at   | 0.87424 | preimplantation protein 4                                                        | Prei4         |
| 1429145_at   | 1.03156 | NHL repeat containing 2                                                          | Nhlrc2        |
| 1429146_at   | 1.06034 | RIKEN cDNA 6620401M08 gene                                                       | 6620401M08Rik |
| 1429147_at   | 0.87630 | growth arrest specific 2                                                         | Gas2          |
| 1429148_at   | 1.03485 | nuclear factor I/C                                                               | Nfic          |
| 1429149_at   | 0.99564 | GINS complex subunit 3 (Psf3 homolog)                                            | Gins3         |
| 1429150_at   | 1.01497 | coiled-coil domain containing 77                                                 | Ccdc77        |
| 1429151_at   | 0.94544 | WD repeat domain 68                                                              | Wdr68         |
| 1429152_at   | 0.91688 | zinc finger with KRAB and SCAN domains 1                                         | Zkscan1       |
| 1429153_at   | 1.15128 | RIKEN cDNA 6530406A20 gene                                                       | 6530406A20Rik |
| 1429154_at   | 0.98319 | "solute carrier family 35, member F2"                                            | Slc35f2       |
| 1429155_at   | 0.92246 | RIKEN cDNA 4933411K20 gene                                                       | 4933411K20Rik |
| 1429156_at   | 0.93264 | RIKEN cDNA 2610036L11 gene                                                       | 2610036L11Rik |
| 1429157_at   | 0.96098 | RIKEN cDNA 4930507C10 gene                                                       | 4930507C10Rik |
| 1429158_at   | 1.04642 | F-box protein 28                                                                 | Fbxo28        |
| 1429159_at   | 0.83536 | RIKEN cDNA 4631408O11 gene                                                       | 4631408O11Rik |
| 1429160_at   | 0.96993 | RIKEN cDNA 2810012L14 gene                                                       | 2810012L14Rik |
| 1429161_at   | 1.03301 | ARV1 homolog (yeast)                                                             | Arv1          |
| 1429162_at   | 0.97396 | RIKEN cDNA 1500015A07 gene                                                       | 1500015A07Rik |

1429163\_at 1.04264 dachsous 1 (Drosophila) Dchs1  
1429164\_at 0.99718 "protease, serine, 36" Prss36  
1429165\_at 1.10487 RIKEN cDNA 3110001I22 gene 3110001I22Rik  
1429166\_s\_at 0.58016 calmin Clmn  
1429167\_at 0.99991 coiled-coil domain containing 112 Ccdc112  
1429168\_at 0.98864 BTB (POZ) domain containing 4 Btbd4  
1429169\_at 1.09392 RNA binding motif protein 3 Rbm3  
1429170\_a\_at 1.09795 metal response element binding transcription factor 1 Mtf1  
1429171\_a\_at 1.05434 RIKEN cDNA 5730507H05 gene 5730507H05Rik  
1429172\_a\_at 1.01667 RIKEN cDNA 5730507H05 gene 5730507H05Rik  
1429173\_at 1.12015 deoxyribonuclease 1-like 1 Dnase111  
1429174\_at 0.92508 WD repeat domain 34 Wdr34  
1429175\_at 0.93400 RIKEN cDNA 2810417M05 gene 2810417M05Rik  
1429176\_at 0.96667 leucine rich repeat and sterile alpha motif containing 1 Lrsam1  
1429177\_x\_at 1.02164 SRY-box containing gene 17 Sox17  
1429178\_at 0.87474 odd Oz/ten-m homolog 3 (Drosophila) Odz3  
1429179\_at 1.11171 collectin sub-family member 11 Colec11  
1429180\_at 1.20721 guanosine monophosphate reductase 2 Gmpr2  
1429181\_at 0.93431 RIKEN cDNA 1700009P17 gene 1700009P17Rik  
1429182\_at 1.02672 RIKEN cDNA 5430400D12 gene 5430400D12Rik  
1429183\_at 1.07159 plakophilin 2 Pkp2  
1429184\_at 0.90506 "GTPase, very large interferon inducible 1" Gvin1  
1429185\_at 0.89707 RIKEN cDNA 4631416L12 gene 4631416L12Rik  
1429186\_a\_at 0.84066 cytidine and dCMP deaminase domain containing 1 Cdadc1  
1429187\_at 0.91706 transmembrane emp24 protein transport domain containing 7 Tmed7  
1429188\_at 0.96892 "COX11 homolog, cytochrome c oxidase assembly protein (yeast)" Cox11  
1429189\_at 0.85919 RIKEN cDNA 1110007C02 gene 1110007C02Rik  
1429190\_at 0.99199 arylsulfatase B Arsb  
1429191\_at 1.03239 DEAH (Asp-Glu-Ala-His) box polypeptide 33 Dhx33  
1429192\_at 0.90232 Sloan-Kettering viral oncogene homolog Ski  
1429193\_at 0.99669 ankyrin repeat and IBR domain containing 1 Ankib1  
1429194\_at 0.94931 tigger transposable element derived 2 Tigd2  
1429195\_at 1.01291 --- ---  
1429196\_at 0.70052 RAB GTPase activating protein 1-like Rabgap11  
1429197\_s\_at 0.90976 RAB GTPase activating protein 1-like Rabgap11  
1429198\_at 0.95229 RIKEN cDNA 1810030O07 gene 1810030O07Rik  
1429199\_s\_at 1.02099 serum amyloid A-like 1 Saal1  
1429200\_at 0.97340 serum amyloid A-like 1 Saal1  
1429201\_at 0.93343 cylindromatosis (turban tumor syndrome) Cyld  
1429202\_at 1.00364 RIKEN cDNA 2610019N06 gene 2610019N06Rik  
1429203\_at 1.12733 RIKEN cDNA 2410076I21 gene 2410076I21Rik  
1429204\_at 0.83708 calcium/calmodulin-dependent protein kinase II inhibitor 2 Camk2n2  
1429205\_at 0.84732 myeloid/lymphoid or mixed lineage-leukemia translocation to 3 homolog



|              |                                                                                                 |               |  |
|--------------|-------------------------------------------------------------------------------------------------|---------------|--|
| (Drosophila) | Mllt3                                                                                           |               |  |
| 1429206_at   | 0.97985 Rho-related BTB domain containing 1                                                     | Rhobtb1       |  |
| 1429207_at   | 1.24791 RIKEN cDNA 5730408K05 gene                                                              | 5730408K05Rik |  |
| 1429208_at   | 0.97740 RIKEN cDNA 5730408K05 gene                                                              | 5730408K05Rik |  |
| 1429209_at   | 0.98270 "procollagen, type XXIII, alpha 1"                                                      | Col23a1       |  |
| 1429210_at   | 0.98636 "procollagen, type XXIII, alpha 1"                                                      | Col23a1       |  |
| 1429211_at   | 0.89970 RIKEN cDNA 2900078E11 gene                                                              | 2900078E11Rik |  |
| 1429212_a_at | 0.87072 leucine rich repeat containing 51                                                       | Lrrc51        |  |
| 1429213_at   | 1.09284 RIKEN cDNA 2310030N02 gene                                                              | 2310030N02Rik |  |
| 1429214_at   | 1.00182 ADAMTS-like 2                                                                           | Adamtsl2      |  |
| 1429215_at   | 1.07869 RIKEN cDNA 2310058N22 gene                                                              | 2310058N22Rik |  |
| 1429216_at   | 1.11682 progesterin and adipoQ receptor family member III                                       | Paqr3         |  |
| 1429217_at   | 0.98046 zinc finger protein 655                                                                 | Zfp655        |  |
| 1429218_at   | 0.89219 de-etiolated homolog 1 (Arabidopsis)                                                    | Det1          |  |
| 1429219_at   | 0.91230 RIKEN cDNA 1200009F10 gene                                                              | 1200009F10Rik |  |
| 1429220_at   | 0.83777 WD40 repeat domain 85                                                                   | Wdr85         |  |
| 1429221_at   | 1.10704 WD40 repeat domain 85                                                                   | Wdr85         |  |
| 1429222_at   | 1.20476 --- ---                                                                                 |               |  |
| 1429223_a_at | 1.00529 hemochromatosis type 2 (juvenile) (human homolog)                                       | Hfe2          |  |
| 1429224_at   | 1.03136 paraneoplastic antigen MA1                                                              | Pnma1         |  |
| 1429225_at   | 0.97122 RIKEN cDNA 6330417K15 gene                                                              | 6330417K15Rik |  |
| 1429226_at   | 0.96421 RIKEN cDNA 2310014F06 gene                                                              | 2310014F06Rik |  |
| 1429227_x_at | 1.06093 nucleosome assembly protein 1-like 1                                                    | Nap111        |  |
| 1429228_at   | 0.75352 RIKEN cDNA 4930534B04 gene                                                              | 4930534B04Rik |  |
| 1429229_s_at | 0.86821 RIKEN cDNA 4930534B04 gene                                                              | 4930534B04Rik |  |
| 1429230_at   | 1.02862 kallikrein 5                                                                            | Klk5          |  |
| 1429231_at   | 1.14808 --- ---                                                                                 |               |  |
| 1429232_at   | 0.88894 RIKEN cDNA 2610528B01 gene                                                              | 2610528B01Rik |  |
| 1429233_at   | 1.02787 septin 11                                                                               | 11-Sep        |  |
| 1429234_s_at | 0.99755 septin 11                                                                               | 11-Sep        |  |
| 1429235_at   | 1.02524 UDP-N-acetyl-alpha-D-galactosamine:polypeptide N-acetylgalactosaminyltransferase-like 2 | Galntl2       |  |
| 1429236_at   | 1.02398 UDP-N-acetyl-alpha-D-galactosamine:polypeptide N-acetylgalactosaminyltransferase-like 2 | Galntl2       |  |
| 1429237_at   | 1.10416 syntaxin 16                                                                             | Stx16         |  |
| 1429238_a_at | 0.95934 2-oxoglutarate and iron-dependent oxygenase domain containing 2                         | Ogfod2        |  |
| 1429239_a_at | 1.34894 StAR-related lipid transfer (START) domain containing 4                                 | Stard4        |  |
| 1429240_at   | 1.32412 StAR-related lipid transfer (START) domain containing 4                                 | Stard4        |  |
| 1429241_at   | 1.00129 NIPA-like domain containing 3                                                           | Npal3         |  |
| 1429242_at   | 0.93955 RIKEN cDNA 1110054O05 gene                                                              | 1110054O05Rik |  |
| 1429243_at   | 1.06776 RIKEN cDNA 1110054O05 gene                                                              | 1110054O05Rik |  |
| 1429244_at   | 1.02006 RIKEN cDNA 2610524H06 gene                                                              | 2610524H06Rik |  |
| 1429245_at   | 0.98608 RIKEN cDNA 2510022D24 gene                                                              | 2510022D24Rik |  |

|              |         |                                                                                              |                                                   |               |
|--------------|---------|----------------------------------------------------------------------------------------------|---------------------------------------------------|---------------|
| 1429246_a_at | 0.82816 | annexin A6                                                                                   | Anxa6                                             |               |
| 1429247_at   | 1.01747 | annexin A6                                                                                   | Anxa6                                             |               |
| 1429248_at   | 1.05676 | RIKEN cDNA 2810002N01                                                                        | gene                                              | 2810002N01Rik |
| 1429249_at   | 1.04293 | RIKEN cDNA 4833424O15                                                                        | gene                                              | 4833424O15Rik |
| 1429250_at   | 0.83403 | dynein cytoplasmic 2 heavy chain 1                                                           | Dync2h1                                           |               |
| 1429251_at   | 0.83307 | "PR domain containing 2, with ZNF domain"                                                    | Prdm2                                             |               |
| 1429252_at   | 1.14562 | RIKEN cDNA 0610010K14                                                                        | gene                                              | 0610010K14Rik |
| 1429253_at   | 0.96084 | "zinc finger, MYM-type 4"                                                                    | Zmym4                                             |               |
| 1429254_at   | 0.96539 | aquaporin 11                                                                                 | Aqp11                                             |               |
| 1429255_at   | 0.95791 | RIKEN cDNA 2010007H12                                                                        | gene                                              | 2010007H12Rik |
| 1429256_at   | 0.95831 | "GTL2, imprinted maternally expressed untranslated mRNA"                                     |                                                   | Gtl2          |
| 1429257_at   | 0.87389 | "GTL2, imprinted maternally expressed untranslated mRNA"                                     |                                                   | Gtl2          |
| 1429258_at   | 1.06983 | RIKEN cDNA 1110025D03                                                                        | gene                                              | 1110025D03Rik |
| 1429259_a_at | 1.02831 | RIKEN cDNA 1810014B01                                                                        | gene                                              | 1810014B01Rik |
| 1429260_at   | 1.03353 | RIKEN cDNA 1810014B01                                                                        | gene                                              | 1810014B01Rik |
| 1429261_at   | 1.07642 | hypothetical protein LOC664968 /// hypothetical protein LOC669621 ///                        |                                                   |               |
|              |         | hypothetical protein LOC675341 LOC664968 /// LOC669621 /// LOC675341                         |                                                   |               |
| 1429262_at   | 1.06165 | Ras association (RalGDS/AF-6) domain family 6                                                | Rassf6                                            |               |
| 1429263_at   | 0.93871 | RIKEN cDNA 4933425D22                                                                        | gene                                              | 4933425D22Rik |
| 1429264_at   | 0.90727 | RIKEN cDNA C030044B11                                                                        | gene                                              | C030044B11Rik |
| 1429265_a_at | 0.85832 | ring finger protein 130                                                                      | Rnf130                                            |               |
| 1429266_at   | 1.04255 | "tetraspan transmembrane protein, hair cell stereocilia"                                     |                                                   | Tmhs          |
| 1429267_at   | 0.95624 | acyl-CoA thioesterase 11                                                                     | Acot11                                            |               |
| 1429268_at   | 1.02251 | RIKEN cDNA 2610318N02                                                                        | gene                                              | 2610318N02Rik |
| 1429269_at   | 1.03090 | cDNA sequence BC068157                                                                       | BC068157                                          |               |
| 1429270_a_at | 1.07499 | synaptonemal complex central element protein 2                                               | Syce2                                             |               |
| 1429271_at   | 1.05193 | RIKEN cDNA 9130011E15                                                                        | gene                                              | 9130011E15Rik |
| 1429272_a_at | 0.90178 | "RIKEN cDNA 9130022K13 gene /// RIKEN cDNA 2210421G13 gene ///                               |                                                   |               |
|              |         | hypothetical protein LOC193676 /// similar to apolipoprotein L, 3 (predicted) /// similar to |                                                   |               |
|              |         | apolipoprotein L, 3 (predicted)"                                                             | 9130022K13Rik /// 2210421G13Rik /// LOC193676 /// |               |
|              |         | LOC666661 /// LOC672691                                                                      |                                                   |               |
| 1429273_at   | 1.29194 | BMP-binding endothelial regulator                                                            | Bmper                                             |               |
| 1429274_at   | 0.96949 | RIKEN cDNA 2310010M24                                                                        | gene                                              | 2310010M24Rik |
| 1429275_at   | 0.72047 | RIKEN cDNA 9530059J11                                                                        | gene                                              | 9530059J11Rik |
| 1429276_at   | 0.99975 | lupus brain antigen 1                                                                        | Lba1                                              |               |
| 1429277_at   | 1.10871 | ---                                                                                          | ---                                               |               |
| 1429278_at   | 1.00732 | nucleotide binding protein-like                                                              | Nubpl                                             |               |
| 1429279_at   | 1.11641 | tryptophanyl tRNA synthetase 2 (mitochondrial)                                               | Wars2                                             |               |
| 1429280_at   | 0.89130 | "collagen, type XXII, alpha 1"                                                               | Col22a1                                           |               |
| 1429281_at   | 0.86293 | RIKEN cDNA 2610008E11                                                                        | gene                                              | 2610008E11Rik |
| 1429282_at   | 1.00027 | "THAP domain containing, apoptosis associated protein 1"                                     |                                                   | Thap1         |
| 1429283_at   | 1.18319 | RIKEN cDNA 1500009M05                                                                        | gene                                              | 1500009M05Rik |
| 1429284_at   | 0.84640 | RIKEN cDNA 8430436F23                                                                        | gene                                              | 8430436F23Rik |

1429285\_at 0.74595 "serine (or cysteine) peptidase inhibitor, clade A (alpha-1 antitrypsin), member 9" Serpina9

1429286\_at 1.00960 RIKEN cDNA 1190003M12 gene 1190003M12Rik

1429287\_a\_at 0.92735 prolactin Prl

1429288\_x\_at 1.00110 syntaxin 18 Stx18

1429289\_at 1.07305 LETM1 domain containing 1 Letmd1

1429290\_at 0.87766 chromobox homolog 6 Cbx6

1429291\_at 1.12008 "proteasome (prosome, macropain) 26S subunit, non-ATPase, 1" Psm1

1429292\_a\_at 0.95969 RIKEN cDNA 2310046K01 gene 2310046K01Rik

1429293\_at 1.04856 glypican 2 (cerebroglycan) Gpc2

1429294\_at 1.00271 thyroid hormone receptor interactor 13 Trip13

1429295\_s\_at 1.05717 thyroid hormone receptor interactor 13 Trip13

1429296\_at 0.90055 "RAB10, member RAS oncogene family" Rab10

1429297\_at 1.05354 "serine (or cysteine) peptidase inhibitor, clade B (ovalbumin), member 12" Serpinb12

1429298\_at 1.07479 dimethylarginine dimethylaminohydrolase 1 Ddah1

1429299\_at 1.01263 dimethylarginine dimethylaminohydrolase 1 Ddah1

1429300\_at 0.96399 ankyrin repeat domain 9 Ankrd9

1429301\_at 0.95204 "casein kinase 2, alpha prime polypeptide" Csnk2a2

1429302\_at 0.99510 "casein kinase 2, alpha prime polypeptide" Csnk2a2

1429303\_at 0.91695 Kruppel-like factor 17 Klf17

1429304\_at 1.03851 ankyrin repeat domain 10 Ankrd10

1429305\_at 0.93974 ankyrin repeat domain 10 Ankrd10

1429306\_at 1.12544 leucine zipper and CTNNBIP1 domain containing Lzic

1429307\_s\_at 0.96514 leucine zipper and CTNNBIP1 domain containing Lzic

1429308\_at 1.06117 PR domain containing 16 Prdm16

1429309\_at 1.03017 PR domain containing 16 Prdm16

1429310\_at 0.79068 fibronectin leucine rich transmembrane protein 3 Flrt3

1429311\_at 1.05817 ubiquitin-conjugating enzyme E2Q (putative) Ube2q

1429312\_s\_at 0.94799 receptor tyrosine kinase-like orphan receptor 1 Ror1

1429313\_at 0.97090 receptor tyrosine kinase-like orphan receptor 1 Ror1

1429314\_at 0.86430 synaptotagmin XI Syt11

1429315\_at 0.86364 synaptotagmin XI Syt11

1429316\_at 0.96508 "RasGEF domain family, member 1A" Rasgef1a

1429317\_at 0.98437 glutaminyl-tRNA synthase (glutamine-hydrolyzing)-like 1 Qrs11

1429318\_a\_at 0.92681 quaking Qk

1429319\_at 0.95054 "ras homolog gene family, member H" Rhoh

1429320\_at 0.89233 RIKEN cDNA 4921511I16 gene 4921511I16Rik

1429321\_at 0.91011 ring finger protein 149 Rnf149

1429322\_at 1.00601 Exosome component 6 Exosc6

1429323\_at 0.90598 RIKEN cDNA 1700001E04 gene 1700001E04Rik

1429324\_at 0.96253 RIKEN cDNA 1700012A16 gene 1700012A16Rik

1429325\_at 1.16049 WD repeat domain 51B Wdr51b

1429326\_at 0.96044 centromere protein L Cenpl  
 1429327\_at 1.18123 serologically defined colon cancer antigen 1 Sdccag1  
 1429328\_at 1.17208 NSFL1 (p97) cofactor (p47) Nsfl1c  
 1429329\_at 1.10445 "COX10 homolog, cytochrome c oxidase assembly protein, heme A: farnesyltransferase (yeast)" Cox10  
 1429330\_at 0.98898 "gamma-aminobutyric acid (GABA-A) receptor, subunit alpha 4" Gabra4  
 1429331\_at 1.23991 RIKEN cDNA 4632427E13 gene 4632427E13Rik  
 1429332\_at 1.20611 RIKEN cDNA 4632427E13 gene 4632427E13Rik  
 1429333\_at 1.00437 kinesin family member 2B Kif2b  
 1429334\_at 1.08805 RIKEN cDNA 2300002O18 gene 2300002O18Rik  
 1429335\_at 1.02091 "small nuclear RNA activating complex, polypeptide 1" Snapc1  
 1429336\_at 0.87680 RIKEN cDNA 2610301K12 gene 2610301K12Rik  
 1429337\_at 1.14595 RIKEN cDNA 2610301K12 gene 2610301K12Rik  
 1429338\_a\_at 1.11304 nucleolar protein 9 Nol9  
 1429339\_a\_at 0.93262 "acyl-Coenzyme A dehydrogenase family, member 10" Acad10  
 1429340\_at 1.03855 "HRAS-like suppressor family, member 5" Hrasls5  
 1429341\_at 0.85743 ornithine decarboxylase antizyme 3 Oaz3  
 1429342\_s\_at 0.88317 RIKEN cDNA 2310021H06 gene 2310021H06Rik  
 1429343\_at 0.96031 RIKEN cDNA 1700012H05 gene 1700012H05Rik  
 1429344\_at 0.99608 cortactin binding protein 2 Ctnbp2  
 1429345\_at 1.19746 "DNA segment, Chr 2, ERATO Doi 435, expressed" D2Ertd435e  
 1429346\_a\_at 0.79119 RIKEN cDNA 4933440J22 gene 4933440J22Rik  
 1429347\_at 1.02424 Bcl2-like 14 (apoptosis facilitator) Bcl2l14  
 1429348\_at 0.89689 "sema domain, immunoglobulin domain (Ig), short basic domain, secreted, (semaphorin) 3C" Sema3c  
 1429349\_at 1.14006 high-mobility group box 4 Hmgb4  
 1429350\_at 0.90627 RIKEN cDNA 1700027M21 gene 1700027M21Rik  
 1429351\_at 0.86636 kelch-like 24 (Drosophila) Klh24  
 1429352\_at 0.93941 molybdenum cofactor sulfurase Mocos  
 1429353\_a\_at 0.93249 RIKEN cDNA 4930511M11 gene 4930511M11Rik  
 1429354\_at 1.03953 thioesterase superfamily member 5 Them5  
 1429355\_at 1.09099 RIKEN cDNA 3300001K11 gene 3300001K11Rik  
 1429356\_s\_at 0.98134 geranylgeranyl diphosphate synthase 1 Ggps1  
 1429357\_at 1.12757 RIKEN cDNA 4921533L14 gene 4921533L14Rik  
 1429358\_at 0.97082 RIKEN cDNA 4921533L14 gene 4921533L14Rik  
 1429359\_s\_at 0.91285 RNA binding protein gene with multiple splicing Rbpms  
 1429360\_at 0.93943 Kruppel-like factor 3 (basic) Klf3  
 1429361\_at 0.95344 pro-melanin-concentrating hormone Pmch  
 1429362\_a\_at 0.94353 "splicing factor 3b, subunit 2" Sf3b2  
 1429363\_at 1.12667 vacuolar protein sorting 37A (yeast) Vps37a  
 1429364\_at 1.03686 RIKEN cDNA 4930579G24 gene 4930579G24Rik  
 1429365\_at 0.89828 RIKEN cDNA 1700016M24 gene 1700016M24Rik  
 1429366\_at 0.89583 leucine rich repeat containing 34 Lrrc34

1429367\_at 0.91777 "WD repeat domain, phosphoinositide interacting 2" Wipi2  
1429368\_at 1.02175 leucine-rich repeats and immunoglobulin-like domains 3 Lrig3  
1429369\_at 1.05203 transportin 3 Tnp3  
1429370\_a\_at 1.17516 "proteasome (prosome, macropain) 26S subunit, non-ATPase, 11" Psmd11  
1429371\_at 0.72434 RIKEN cDNA 2810426N06 gene 2810426N06Rik  
1429372\_at 0.93942 SRY-box containing gene 11 Sox11  
1429373\_x\_at 0.94208 CREB regulated transcription coactivator 2 Crtc2  
1429374\_at 0.95818 cysteine-rich perinuclear theca 12 Cypt12  
1429375\_at 1.04221 anaphase promoting complex subunit 10 Anapc10  
1429376\_s\_at 1.03923 anaphase promoting complex subunit 10 Anapc10  
1429377\_at 1.06781 RIKEN cDNA 2410004A20 gene 2410004A20Rik  
1429378\_x\_at 0.95496 cDNA sequence AY761184 AY761184  
1429379\_at 0.95720 extra cellular link domain-containing 1 Xlkd1  
1429380\_at 0.97341 regulator of G-protein signaling 12 Rgs12  
1429381\_x\_at 1.09473 immunoglobulin heavy chain (J558 family) /// similar to immunoglobulin heavy chain variable region /// similar to immunoglobulin mu-chain /// similar to anti-poly(dC) monoclonal antibody heavy chain /// similar to Ig heavy chain V region 23 precursor /// similar to Ig heavy chain V region 102 precursor /// similar to Ig heavy chain V region VH558 A1/A4 precursor Igh-VJ558 /// LOC238447 /// LOC544903 /// LOC544907 /// LOC633774 /// LOC676478 /// LOC677563  
1429382\_at 0.93147 translocase of outer mitochondrial membrane 40 homolog-like (yeast) Tomm40l  
1429383\_at 0.85708 "casein kinase 1, gamma 3" Csnk1g3  
1429384\_at 0.97486 "casein kinase 1, gamma 3" Csnk1g3  
1429385\_at 0.96003 WD repeat domain 68 Wdr68  
1429386\_at 0.90200 WD repeat domain 68 Wdr68  
1429387\_at 1.00223 GRB2-related adaptor protein Grap  
1429388\_at 0.90407 Nanog homeobox Nanog  
1429389\_at 0.90070 SET domain and mariner transposase fusion gene Setmar  
1429390\_at 0.66487 acid phosphatase-like 2 Acpl2  
1429391\_at 1.07305 acid phosphatase-like 2 Acpl2  
1429392\_at 1.06812 WD repeat domain 40A Wdr40a  
1429393\_at 0.93069 WD repeat domain 40A Wdr40a  
1429394\_at 1.11625 RIKEN cDNA A130010J15 gene A130010J15Rik  
1429395\_at 0.90327 "glutathione S-transferase, C-terminal domain containing" Gstcd  
1429396\_at 0.72767 autophagy related 16 like 2 (S. cerevisiae) Atg16l2  
1429397\_a\_at 0.90786 RIKEN cDNA 4921509E07 gene 4921509E07Rik  
1429398\_at 1.10027 RIKEN cDNA 5730446D14 gene 5730446D14Rik  
1429399\_at 0.83565 ring finger protein 125 Rnf125  
1429400\_at 1.08697 chloride channel 5 Clcn5  
1429401\_at 0.88900 storkhead box 2 Stox2  
1429402\_at 1.03061 glycosyltransferase 8 domain containing 2 Glt8d2  
1429403\_x\_at 1.12574 glycosyltransferase 8 domain containing 2 Glt8d2  
1429404\_at 1.13257 RIKEN cDNA 2010317E24 gene 2010317E24Rik

|              |         |                                                                                         |               |
|--------------|---------|-----------------------------------------------------------------------------------------|---------------|
| 1429405_at   | 0.99620 | RIKEN cDNA 2010317E24 gene                                                              | 2010317E24Rik |
| 1429406_at   | 0.99414 | "solute carrier organic anion transporter family, member 6c1"                           | Slco6c1       |
| 1429407_at   | 0.96423 | peroxisomal biogenesis factor 11c                                                       | Pex11c        |
| 1429408_at   | 0.96291 | "TBC1 domain family, member 21"                                                         | Tbc1d21       |
| 1429409_at   | 1.05931 | "NACHT, leucine rich repeat and PYD containing 14"                                      | Nalp14        |
| 1429410_at   | 1.03368 | enhancer of yellow 2 homolog (Drosophila)                                               | Eny2          |
| 1429411_a_at | 0.99597 | enhancer of yellow 2 homolog (Drosophila)                                               | Eny2          |
| 1429412_at   | 1.14402 | enhancer of yellow 2 homolog (Drosophila)                                               | Eny2          |
| 1429413_at   | 0.89923 | carboxypeptidase M                                                                      | Cpm           |
| 1429414_at   | 0.91712 | RIKEN cDNA 4933400E14 gene                                                              | 4933400E14Rik |
| 1429415_at   | 0.93734 | protein kinase C binding protein 1                                                      | Prkcbp1       |
| 1429416_at   | 1.05512 | tetratricopeptide repeat domain 9B                                                      | Ttc9b         |
| 1429417_at   | 0.90882 | RIKEN cDNA 4833446K15 gene                                                              | 4833446K15Rik |
| 1429418_at   | 1.12664 | CDC14 cell division cycle 14 homolog B (S. cerevisiae)                                  | Cdc14b        |
| 1429419_at   | 1.02036 | RIKEN cDNA 2310007A19 gene                                                              | 2310007A19Rik |
| 1429420_at   | 0.87081 | RIKEN cDNA 4931414P19 gene                                                              | 4931414P19Rik |
| 1429421_at   | 0.90380 | RIKEN cDNA 2610203E10 gene                                                              | 2610203E10Rik |
| 1429422_at   | 0.94297 | RIKEN cDNA 4933412E12 gene                                                              | 4933412E12Rik |
| 1429423_at   | 1.23237 | RIKEN cDNA 4930518I15 gene                                                              | 4930518I15Rik |
| 1429424_at   | 0.80657 | cystatin 13                                                                             | Cst13         |
| 1429425_at   | 0.88933 | ring finger protein 139                                                                 | Rnf139        |
| 1429426_at   | 0.94613 | ring finger protein 139                                                                 | Rnf139        |
| 1429427_s_at | 0.73368 | "transcription factor 7-like 2, T-cell specific, HMG-box"                               | Tcf7l2        |
| 1429428_at   | 0.82665 | "transcription factor 7-like 2, T-cell specific, HMG-box"                               | Tcf7l2        |
| 1429429_s_at | 0.98206 | protein-L-isoaspartate (D-aspartate) O-methyltransferase domain containing 1            | Pcmd1         |
| 1429430_at   | 0.79991 | ---                                                                                     | ---           |
| 1429431_at   | 0.97932 | "zinc finger protein, subfamily 1A, 5"                                                  | Zfpn1a5       |
| 1429432_at   | 0.92998 | BAT2 domain containing 1                                                                | Bat2d         |
| 1429433_at   | 1.20691 | BAT2 domain containing 1                                                                | Bat2d         |
| 1429434_at   | 0.94155 | "phosphatidylinositol 3-kinase, catalytic, alpha polypeptide"                           | Pik3ca        |
| 1429435_x_at | 0.99407 | "phosphatidylinositol 3-kinase, catalytic, alpha polypeptide"                           | Pik3ca        |
| 1429436_at   | 0.98700 | PRP40 pre-mRNA processing factor 40 homolog A (yeast)                                   | Prpf40a       |
| 1429437_at   | 0.99059 | PRP40 pre-mRNA processing factor 40 homolog A (yeast)                                   | Prpf40a       |
| 1429438_at   | 0.81071 | Bcl6 interacting corepressor                                                            | Bcor          |
| 1429439_at   | 0.99434 | "excision repair cross-complementing rodent repair deficiency, complementation group 8" | Ercc8         |
| 1429440_at   | 1.11436 | RIKEN cDNA 1810041L15 gene                                                              | 1810041L15Rik |
| 1429441_at   | 1.03002 | F-box protein 30                                                                        | Fbxo30        |
| 1429442_at   | 0.97353 | RNA pseudouridylate synthase domain containing 2                                        | Rpsud2        |
| 1429443_at   | 0.86537 | copine IV                                                                               | Cpne4         |
| 1429444_at   | 0.67076 | "RAS-like, family 11, member A"                                                         | Rasl11a       |
| 1429445_at   | 0.89472 | RIKEN cDNA 4921510J17 gene                                                              | 4921510J17Rik |

1429446\_at 1.03401 serologically defined colon cancer antigen 1 Sdccag1  
1429447\_at 0.98312 Ellis van Creveld syndrome 2 homolog (human) Evc2  
1429448\_s\_at 0.89663 CXXC finger 6 Cxxc6  
1429449\_at 1.21272 sterile alpha motif domain containing 4 Samd4  
1429450\_at 1.00348 RIKEN cDNA 1700026J04 gene 1700026J04Rik  
1429451\_at 0.93699 RIKEN cDNA 2610301B20 gene 2610301B20Rik  
1429452\_x\_at 0.91655 RIKEN cDNA 4933439C20 gene 4933439C20Rik  
1429453\_a\_at 1.14475 mitochondrial ribosomal protein L55 Mrpl55  
1429454\_at 1.04305 GTPase activating protein and VPS9 domains 1 Gapvd1  
1429455\_at 1.07988 GTPase activating protein and VPS9 domains 1 Gapvd1  
1429456\_a\_at 1.01361 polymerase (RNA) III (DNA directed) polypeptide E Polr3e  
1429457\_at 0.95278 RIKEN cDNA 2310020A21 gene 2310020A21Rik  
1429458\_at 1.01391 "RIKEN cDNA 2410127L17 gene /// similar to RIKEN cDNA 2410127L17 ///  
similar to CG11596-PA, isoform A /// similar to CG11596-PA, isoform A /// similar to RIKEN cDNA  
2410127L17 gene" 2410127L17Rik /// LOC626107 /// LOC666456 /// LOC677519 /// LOC677553  
1429459\_at 1.10995 "sema domain, immunoglobulin domain (Ig), short basic domain, secreted,  
(semaphorin) 3D" Sema3d  
1429460\_at 1.03147 G protein-coupled receptor 115 Gpr115  
1429461\_at 1.04684 integrator complex subunit 2 Ints2  
1429462\_at 1.08313 "solute carrier family 25, member 32" Slc25a32  
1429463\_at 0.88136 "protein kinase, AMP-activated, alpha 2 catalytic subunit" Prkaa2  
1429464\_at 0.89741 "protein kinase, AMP-activated, alpha 2 catalytic subunit" Prkaa2  
1429465\_at 1.11540 RIKEN cDNA 1700010M22 gene 1700010M22Rik  
1429466\_s\_at 0.87056 anterior pharynx defective 1c homolog (C. elegans) /// anterior pharynx  
defective 1b homolog (C. elegans) Aph1c /// Aph1b  
1429467\_s\_at 0.97897 "solute carrier family 26, member 3" Slc26a3  
1429468\_at 1.02169 RIKEN cDNA 1110018F16 gene 1110018F16Rik  
1429469\_at 1.27317 RIKEN cDNA A930013F10 gene A930013F10Rik  
1429470\_at 0.94452 speedy homolog A (Drosophila) Spdya  
1429471\_at 0.90787 RIKEN cDNA 1110017D15 gene 1110017D15Rik  
1429472\_at 1.04807 RIKEN cDNA 4921525O09 gene 4921525O09Rik  
1429473\_at 0.91857 RIKEN cDNA 1200003I07 gene 1200003I07Rik  
1429474\_at 0.85173 "zinc binding alcohol dehydrogenase, domain containing 1" Zadh1  
1429475\_at 0.99134 RIKEN cDNA 2810457I06 gene 2810457I06Rik  
1429476\_s\_at 0.98918 "DnaJ (Hsp40) homolog, subfamily A, member 2" Dnaja2  
1429477\_at 1.55783 "DNA segment, Chr 15, ERATO Doi 785, expressed" D15Ertd785e  
1429478\_at 1.60827 RIKEN cDNA 6720463M24 gene 6720463M24Rik  
1429479\_at 0.95052 RIKEN cDNA 6430590I03 gene 6430590I03Rik  
1429480\_at 1.04091 RIKEN cDNA 1700011N24 gene 1700011N24Rik  
1429481\_at 0.97997 RIKEN cDNA 4833426I10 gene 4833426I10Rik  
1429482\_at 0.95830 RIKEN cDNA 1700003H04 gene 1700003H04Rik  
1429483\_at 1.04845 nuclear domain 10 protein 52 Ndp52  
1429484\_at 1.03338 RIKEN cDNA 1110002L01 gene 1110002L01Rik

1429485\_a\_at 1.14810 "UTP11-like, U3 small nucleolar ribonucleoprotein, (yeast)" Utp11  
1429486\_at 0.69089 "6-phosphofructo-2-kinase/fructose-2,6-biphosphatase 2" Pfkfb2  
1429487\_at 1.01828 "protein phosphatase 1, regulatory (inhibitor) subunit 12A" Ppp1r12a  
1429488\_at 1.24900 "zinc finger, DHHC domain containing 21" Zdhhc21  
1429489\_at 0.95405 "REX1, RNA exonuclease 1 homolog (S. cerevisiae)" Rexo1  
1429490\_at 1.02746 similar to Telomere-associated protein RIF1 (Rap1-interacting factor 1 homolog) (mRif1) LOC671598  
1429491\_s\_at 1.04563 Rap1 interacting factor 1 homolog (yeast) /// similar to Telomere-associated protein RIF1 (Rap1-interacting factor 1 homolog) (mRif1) Rif1 /// LOC671598  
1429492\_x\_at 0.96040 phosphatidylserine synthase 2 Ptdss2  
1429493\_at 1.04512 methyltransferase like 4 Mettl4  
1429494\_at 1.60966 tripartite motif-containing 35 Trim35  
1429495\_at 1.01124 RIKEN cDNA 1110004B13 gene 1110004B13Rik  
1429496\_x\_at 1.01237 RIKEN cDNA 2300002M23 gene 2300002M23Rik  
1429497\_s\_at 0.97797 sorting nexin 6 Snx6  
1429498\_at 0.86613 SFT2 domain containing 3 Sft2d3  
1429499\_at 1.02314 F-box only protein 5 Fbxo5  
1429500\_at 0.94765 "protein phosphatase 1A, magnesium dependent, alpha isoform" Ppm1a  
1429501\_s\_at 0.89378 "protein phosphatase 1A, magnesium dependent, alpha isoform" Ppm1a  
1429502\_at 0.99025 "stress 70 protein chaperone, microsomal-associated, human homolog" Stch  
1429503\_at 0.62694 RIKEN cDNA 2900024C23 gene 2900024C23Rik  
1429504\_at 0.94547 "RNA-binding region (RNP1, RRM) containing 3" Rnpc3  
1429505\_at 0.94947 RIKEN cDNA 2310076G13 gene 2310076G13Rik  
1429506\_at 1.13900 naked cuticle 1 homolog (Drosophila) /// similar to naked cuticle 1 homolog /// similar to naked cuticle 1 homolog Nkd1 /// LOC634379 /// LOC671838  
1429507\_at 0.98800 similar to naked cuticle 1 homolog LOC671838  
1429508\_at 0.99616 RIKEN cDNA 2310057M21 gene 2310057M21Rik  
1429509\_at 0.96058 RIKEN cDNA 2600001B17 gene 2600001B17Rik  
1429510\_at 0.93904 RIKEN cDNA 2810410L24 gene 2810410L24Rik  
1429511\_at 1.05454 RIKEN cDNA 4933402E13 gene 4933402E13Rik  
1429512\_at 0.96020 zona pellucida binding protein 2 Zpbp2  
1429513\_at 0.84378 RIKEN cDNA 1700019M22 gene 1700019M22Rik  
1429514\_at 0.80864 phosphatidic acid phosphatase type 2B Ppap2b  
1429515\_at 1.00089 ubiquitin protein ligase E3 component n-recogin 2 Ubr2  
1429516\_at 0.92878 ubiquitin protein ligase E3 component n-recogin 2 Ubr2  
1429517\_at 0.91225 "zinc finger, FYVE domain containing 20" Zfyve20  
1429518\_at 1.04289 Fas apoptotic inhibitory molecule 2 Faim2  
1429519\_at 0.82709 fucose-1-phosphate guanylyltransferase Fpgt  
1429520\_a\_at 0.97427 "phytoceramidase, alkaline" Phca  
1429521\_at 1.12645 "alkB, alkylation repair homolog 8 (E. coli)" Alkbh8  
1429522\_at 0.93195 ankyrin repeat domain 42 Ankrd42  
1429523\_a\_at 0.99500 "solute carrier family 39 (metal ion transporter), member 5" Slc39a5  
1429524\_at 1.08688 myosin IF Myo1f



1429525\_s\_at 0.91523 myosin IF Myo1f  
1429526\_at 1.55721 bromodomain containing 8 Brd8  
1429527\_a\_at 1.06945 phospholipid scramblase 1 /// hypothetical LOC433328 /// hypothetical protein  
LOC677340 Plscr1 /// LOC433328 /// LOC677340  
1429528\_at 1.04906 RAE1 RNA export 1 homolog (S. pombe) Rae1  
1429529\_at 0.98394 "tRNA splicing endonuclease 54 homolog (SEN54, S. cerevisiae)" Tsen54  
1429530\_a\_at 1.01944 sphingomyelin phosphodiesterase 4 Smpd4  
1429531\_at 0.88546 sphingomyelin phosphodiesterase 4 Smpd4  
1429532\_at 1.01820 microrchidia 2A Morc2a  
1429533\_at 0.98944 "inner membrane protein, mitochondrial" Immt  
1429534\_a\_at 1.05323 "inner membrane protein, mitochondrial" Immt  
1429535\_at 1.27946 armadillo repeat containing 8 Armc8  
1429536\_at 1.07814 RIKEN cDNA 2310040C09 gene 2310040C09Rik  
1429537\_at 1.01354 RIKEN cDNA 5730406M06 gene 5730406M06Rik  
1429538\_a\_at 1.04766 RIKEN cDNA 5730406M06 gene 5730406M06Rik  
1429539\_at 0.88414 BCL2-like 13 (apoptosis facilitator) Bcl2l13  
1429540\_at 1.06804 cornifelin Cnfn  
1429541\_at 1.00268 RIKEN cDNA 2500002G23 gene 2500002G23Rik  
1429542\_at 1.08376 RIKEN cDNA 1700007B14 gene 1700007B14Rik  
1429543\_at 0.80979 RIKEN cDNA 6230424C14 gene 6230424C14Rik  
1429544\_at 1.13935 RIKEN cDNA 1700029J11 gene 1700029J11Rik  
1429545\_at 1.15494 "ubiquitin-conjugating enzyme E2I /// RIKEN cDNA F830028O17 gene ///  
similar to Chain A, Human Ubiquitin-Conjugating Enzyme Ubc9 /// similar to Ubiquitin-conjugating  
enzyme E2 I (Ubiquitin-protein ligase I) (Ubiquitin carrier protein I) (SUMO-1-protein ligase) (SUMO-  
1-conjugating enzyme) (Ubiquitin-conjugating enzyme UbcE2A)" Ube2i /// F830028O17Rik ///  
LOC546265 /// LOC669417  
1429546\_at 0.79731 RIKEN cDNA 4930423K06 gene 4930423K06Rik  
1429547\_at 0.98825 RIKEN cDNA 4930578I06 gene 4930578I06Rik  
1429548\_at 0.96919 testis expressed gene 22 Tex22  
1429549\_at 0.93735 "procollagen, type XXVII, alpha 1" Col27a1  
1429550\_at 0.90488 ectonucleoside triphosphate diphosphohydrolase 8 Entpd8  
1429551\_at 0.85405 RIKEN cDNA 4930579G22 gene 4930579G22Rik  
1429552\_at 0.96443 WD repeat domain 16 Wdr16  
1429553\_at 0.99782 cartilage intermediate layer protein 2 Cilp2  
1429554\_at 1.01757 serologically defined colon cancer antigen 3 Sdccag3  
1429555\_at 0.89575 claudin domain containing 1 Cldnd1  
1429556\_at 1.16086 RIKEN cDNA 2610024B07 gene 2610024B07Rik  
1429557\_at 1.08971 minichromosome maintenance deficient 8 (S. cerevisiae) Mcm8  
1429558\_a\_at 0.94751 "La ribonucleoprotein domain family, member 7" Larp7  
1429559\_at 0.97040 "guanine nucleotide binding protein, alpha q polypeptide" Gnaq  
1429560\_at 0.98384 "zinc finger protein 422, related sequence 1" Zfp422-rs1  
1429561\_at 1.00950 "BRF2, subunit of RNA polymerase III transcription initiation factor, BRF1-  
like" Brf2

|              |         |                                                         |                                                                                 |
|--------------|---------|---------------------------------------------------------|---------------------------------------------------------------------------------|
| 1429562_at   | 1.03244 | RIKEN cDNA 5031415C07 gene                              | 5031415C07Rik                                                                   |
| 1429563_x_at | 0.99029 | RIKEN cDNA 5031415C07 gene                              | 5031415C07Rik                                                                   |
| 1429564_at   | 1.07807 | polycomb group ring finger 5                            | Pcgf5                                                                           |
| 1429565_s_at | 0.73306 | late cornified envelope 5A                              | Lce5a                                                                           |
| 1429566_a_at | 0.94159 | homeodomain interacting protein kinase 2                | Hipk2                                                                           |
| 1429567_at   | 0.87089 | RIKEN cDNA 4632411J06 gene                              | 4632411J06Rik                                                                   |
| 1429568_x_at | 1.03695 | ubiquitin-conjugating enzyme E2F (putative)             | Ube2f                                                                           |
| 1429569_a_at | 0.88243 | coiled-coil domain containing 46                        | Ccdc46                                                                          |
| 1429570_at   | 1.29155 | mixed lineage kinase domain-like                        | Mlkl                                                                            |
| 1429571_a_at | 0.99728 | sperm acrosome associated 1                             | Spaca1                                                                          |
| 1429572_at   | 1.01171 | "NOL1/NOP2/Sun domain family, member 7"                 | Nsun7                                                                           |
| 1429573_at   | 0.96822 | DMRT-like family C1a                                    | Dmrta1a                                                                         |
| 1429574_at   | 0.93640 | chloride intracellular channel 3                        | Clic3                                                                           |
| 1429575_at   | 0.90213 | ---                                                     | ---                                                                             |
| 1429576_at   | 1.11183 | RIKEN cDNA 1700060E18 gene                              | 1700060E18Rik                                                                   |
| 1429577_at   | 0.86197 | IQ motif containing F4                                  | Iqcf4                                                                           |
| 1429578_at   | 0.94571 | RIKEN cDNA 1700049K14 gene                              | 1700049K14Rik                                                                   |
| 1429579_at   | 0.86934 | RIKEN cDNA 6330407I18 gene                              | 6330407I18Rik                                                                   |
| 1429580_x_at | 1.12494 | RIKEN cDNA 5133400G04 gene                              | 5133400G04Rik                                                                   |
| 1429581_at   | 1.12030 | "acyl-Coenzyme A dehydrogenase family, member 9"        | Acad9                                                                           |
| 1429582_at   | 0.86675 | BTB (POZ) domain containing 14A                         | Btbd14a                                                                         |
| 1429583_at   | 0.98639 | RIKEN cDNA 2900053A13 gene                              | 2900053A13Rik                                                                   |
| 1429584_at   | 0.86490 | myoneurin                                               | Mynn                                                                            |
| 1429585_s_at | 0.79914 | myoneurin                                               | Mynn                                                                            |
| 1429586_at   | 1.11533 | RIKEN cDNA 4930558N01 gene                              | 4930558N01Rik                                                                   |
| 1429587_at   | 1.06642 | RNA binding motif protein 34                            | Rbm34                                                                           |
| 1429588_at   | 0.98433 | RIKEN cDNA 2810474O19 gene                              | 2810474O19Rik                                                                   |
| 1429589_at   | 1.01130 | RIKEN cDNA 6330404F12 gene                              | 6330404F12Rik                                                                   |
| 1429590_at   | 0.77239 | "transforming, acidic coiled-coil containing protein 1" | Tacc1                                                                           |
| 1429591_at   | 0.79057 | "transforming, acidic coiled-coil containing protein 1" | Tacc1                                                                           |
| 1429592_at   | 0.94396 | lipoma HMGIC fusion partner-like 3                      | Lhfp13                                                                          |
| 1429593_at   | 1.02210 | "solute carrier family 38, member 2"                    | Slc38a2                                                                         |
| 1429594_at   | 0.84381 | "solute carrier family 38, member 2"                    | Slc38a2                                                                         |
| 1429595_at   | 0.96537 | RIKEN cDNA 2700049A03 gene                              | 2700049A03Rik                                                                   |
| 1429596_at   | 1.06511 | "solute carrier family 7, member 6 opposite strand"     | Slc7a6os                                                                        |
| 1429597_at   | 1.00971 | developmental pluripotency associated 4                 | Dppa4                                                                           |
| 1429598_at   | 0.88428 | RIKEN cDNA 2310042D19 gene                              | 2310042D19Rik                                                                   |
| 1429599_a_at | 1.03598 | RIKEN cDNA C630010D07 gene                              | /// similar to methylenetetrahydrofolate dehydrogenase (NADP+ dependent) 2-like |
|              |         | /// region containing RIKEN cDNA C630010D07 gene;       |                                                                                 |
|              |         | RIKEN cDNA 1110019K23 gene                              | C630010D07Rik                                                                   |
|              |         | /// LOC665563                                           | /// LOC674367                                                                   |
| 1429600_at   | 1.05807 | RIKEN cDNA C630010D07 gene                              | /// similar to methylenetetrahydrofolate dehydrogenase (NADP+ dependent) 2-like |
|              |         | /// region containing RIKEN cDNA C630010D07 gene;       |                                                                                 |
|              |         | RIKEN cDNA 1110019K23 gene                              | C630010D07Rik                                                                   |
|              |         | /// LOC665563                                           | /// LOC674367                                                                   |

1429601\_x\_at 1.05608 RIKEN cDNA C630010D07 gene /// similar to methylenetetrahydrofolate dehydrogenase (NADP+ dependent) 2-like /// region containing RIKEN cDNA C630010D07 gene; RIKEN cDNA 1110019K23 gene C630010D07Rik /// LOC665563 /// LOC674367

1429602\_at 0.89247 D164 sialomucin-like 2 Cd164l2

1429603\_at 1.19809 RIKEN cDNA 2610110G12 gene 2610110G12Rik

1429604\_at 1.03144 RIKEN cDNA 1810011H11 gene 1810011H11Rik

1429605\_at 0.92043 RIKEN cDNA 4930532L20 gene 4930532L20Rik

1429606\_at 0.93618 RIKEN cDNA 4930527B16 gene 4930527B16Rik

1429607\_at 0.92052 "trafficking protein, kinesin binding 2" Trak2

1429608\_at 1.00528 alcohol dehydrogenase 6A (class V) Adh6a

1429609\_at 1.07103 RIKEN cDNA 1700001D09 gene 1700001D09Rik

1429610\_a\_at 1.04696 zinc finger protein 511 Zfp511

1429611\_at 0.99891 RIKEN cDNA 1700034E13 gene 1700034E13Rik

1429612\_at 1.05417 echinoderm microtubule associated protein like 4 Eml4

1429613\_at 0.94677 RIKEN cDNA 0710001B24 gene 0710001B24Rik

1429614\_at 1.08629 PRP18 pre-mRNA processing factor 18 homolog (yeast) Prpf18

1429615\_at 0.96702 zinc finger protein 91 Zfp91

1429616\_at 1.08805 zinc finger protein 91 Zfp91

1429617\_at 1.10968 cylindromatosis (turban tumor syndrome) Cyld

1429618\_at 1.22584 cylindromatosis (turban tumor syndrome) Cyld

1429619\_a\_at 1.02566 RIKEN cDNA 8430406I07 gene 8430406I07Rik

1429620\_at 0.97818 RIKEN cDNA 8430406I07 gene 8430406I07Rik

1429621\_at 0.69383 cullin-associated and neddylation-dissociated 2 (putative) Cand2

1429622\_at 0.88066 cullin-associated and neddylation-dissociated 2 (putative) Cand2

1429623\_at 0.91904 zinc finger protein 644 Zfp644

1429624\_at 1.22684 "SAFB-like, transcription modulator" Sltm

1429625\_at 0.77265 RIKEN cDNA 2900054C01 gene 2900054C01Rik

1429626\_at 1.05083 surfactant associated protein A1 Sftpa1

1429627\_at 1.03952 peptidylprolyl isomerase (cyclophilin)-like 3 Ppil3

1429628\_at 1.12438 RIKEN cDNA 6330407J23 gene 6330407J23Rik

1429629\_at 0.90653 enhancer of zeste homolog 1 (Drosophila) Ezh1

1429630\_at 1.06578 enhancer of zeste homolog 1 (Drosophila) Ezh1

1429631\_at 0.94387 "sirtuin 6 (silent mating type information regulation 2, homolog) 6 (S. cerevisiae)" Sirt6

1429632\_at 1.11087 trafficking protein particle complex 4 Trappc4

1429633\_at 1.22685 ligand dependent nuclear receptor corepressor Lcor

1429634\_at 0.82259 zinc finger protein 580 Zfp580

1429635\_at 1.01622 coiled-coil domain containing 89 Ccdc89

1429636\_at 0.87902 RIKEN cDNA 1700010D01 gene /// similar to hypothetical protein LOC76386 1700010D01Rik /// MGC118250

1429637\_at 1.03916 RIKEN cDNA 2210419I08 gene 2210419I08Rik

1429638\_at 0.96916 Werner helicase interacting protein 1 Wrnip1

1429639\_at 1.19179 preimplantation protein 4 Prei4

1429640\_at 1.02595 RIKEN cDNA 1700025F22 gene 1700025F22Rik  
1429641\_x\_at 1.00329 RIKEN cDNA 2310007F04 gene 2310007F04Rik  
1429642\_at 0.75939 "AN1, ubiquitin-like, homolog (Xenopus laevis)" Anubl1  
1429643\_a\_at 0.97527 phosphodiesterase 1C Pde1c  
1429644\_at 0.96003 RIKEN cDNA 1700011I03 gene /// hypothetical gene supported by AK005868;  
BC048576 1700011I03Rik /// LOC433188  
1429645\_at 0.98251 RIKEN cDNA 1700017G19 gene 1700017G19Rik  
1429646\_at 0.92849 RIKEN cDNA 1700112C13 gene 1700112C13Rik  
1429647\_at 0.93010 RIKEN cDNA 1700027L20 gene 1700027L20Rik  
1429648\_at 1.05449 "solute carrier family 35 (UDP-N-acetylglucosamine (UDP-GlcNAc)  
transporter), member 3" Slc35a3  
1429649\_at 0.89877 "solute carrier family 35 (UDP-N-acetylglucosamine (UDP-GlcNAc)  
transporter), member 3" Slc35a3  
1429650\_at 0.94455 serine/threonine kinase 40 Stk40  
1429651\_at 1.10021 phosphatase and actin regulator 3 Phactr3  
1429652\_at 0.79164 RIKEN cDNA 1190002C06 gene 1190002C06Rik  
1429653\_at 0.85621 genetic suppressor element 1 Gse1  
1429654\_at 0.95685 developmental pluripotency associated 2 Dppa2  
1429655\_at 1.10398 NudC domain containing 1 Nudcd1  
1429656\_at 1.10474 Rho-related BTB domain containing 1 Rhobtb1  
1429657\_at 1.31079 "zinc finger, AN1-type domain 5" Zfand5  
1429658\_a\_at 1.10946 structural maintenance of chromosomes 2 Smc2  
1429659\_at 0.82716 structural maintenance of chromosomes 2 Smc2  
1429660\_s\_at 0.98570 structural maintenance of chromosomes 2 Smc2  
1429661\_at 1.05393 Rho-related BTB domain containing 3 Rhobtb3  
1429662\_at 0.95110 spermatogenesis associated 1 Spata1  
1429663\_at 0.71455 katanin p60 subunit A-like 2 Katnal2  
1429664\_at 0.94191 cyclin-dependent kinase-like 1 (CDC2-related kinase) Cdkl1  
1429665\_at 0.93165 RIKEN cDNA 6230416J20 gene 6230416J20Rik  
1429666\_at 0.99227 potassium channel tetramerisation domain containing 16 Kctd16  
1429667\_at 0.90686 "POU domain, class 4, transcription factor 1" Pou4f1  
1429668\_at 1.02371 "POU domain, class 4, transcription factor 1" Pou4f1  
1429669\_at 0.86790 RIKEN cDNA 4930488L21 gene 4930488L21Rik  
1429670\_a\_at 0.94000 leucine-rich repeats and IQ motif containing 2 Lrriq2  
1429671\_at 0.74019 RIKEN cDNA 2410018M08 gene 2410018M08Rik  
1429672\_at 1.01873 RIKEN cDNA 5830407E08 gene 5830407E08Rik  
1429673\_at 1.05244 RIKEN cDNA 5830407E08 gene 5830407E08Rik  
1429674\_at 0.98412 RIKEN cDNA 1700113H08 gene 1700113H08Rik  
1429675\_at 1.13081 RIKEN cDNA 1700023A16 gene 1700023A16Rik  
1429676\_at 0.96484 "Adult male stomach cDNA, RIKEN full-length enriched library,  
clone:2210408O09 product:unclassifiable, full insert sequence" ---  
1429677\_at 1.05892 RIKEN cDNA 1700056E22 gene 1700056E22Rik  
1429678\_at 1.07032 RIKEN cDNA 5730508B09 gene 5730508B09Rik

1429679\_at 1.00533 leucine rich repeat containing 17 Lrrc17  
1429680\_at 1.23699 transformer 2 alpha homolog (Drosophila) Tra2a  
1429681\_a\_at 1.12465 "glycoprotein, synaptic 2" Gpsn2  
1429682\_at 0.76820 RIKEN cDNA 4930431B09 gene 4930431B09Rik  
1429683\_at 0.95021 RIKEN cDNA 5830472M02 gene 5830472M02Rik  
1429684\_at 1.05145 RIKEN cDNA 5830472M02 gene 5830472M02Rik  
1429685\_at 0.99493 RIKEN cDNA C030002O17 gene C030002O17Rik  
1429686\_at 1.15397 polymerase (RNA) III (DNA directed) polypeptide F Polr3f  
1429687\_at 0.96685 RIKEN cDNA 4930503B16 gene 4930503B16Rik  
1429688\_at 0.99534 aryl hydrocarbon receptor nuclear translocator-like 2 Arntl2  
1429689\_at 1.00142 RIKEN cDNA 4932433N03 gene 4932433N03Rik  
1429690\_at 0.88583 RIKEN cDNA 1300003B13 gene 1300003B13Rik  
1429691\_at 0.87009 RIKEN cDNA 5430405N12 gene 5430405N12Rik  
1429692\_s\_at 1.01057 GTP cyclohydrolase 1 Gch1  
1429693\_at 1.23305 disabled homolog 2 (Drosophila) Dab2  
1429694\_at 1.13320 RIKEN cDNA 4930402H24 gene 4930402H24Rik  
1429695\_at 0.98297 izumo sperm-egg fusion 1 Izumo1  
1429696\_at 0.92243 G protein-coupled receptor 123 Gpr123  
1429697\_at 0.87981 RIKEN cDNA 1700023D19 gene 1700023D19Rik  
1429698\_at 1.10452 mitochondrial transcription termination factor Mterf  
1429699\_at 1.01939 "3-oxoacyl-ACP synthase, mitochondrial" Oxsm  
1429700\_at 0.94040 RIKEN cDNA 3110040M04 gene /// similar to U2-associated SR140 protein ///  
hypothetical protein LOC668055 /// similar to U2-associated SR140 protein /// similar to U2-associated  
SR140 protein /// similar to U2-associated SR140 protein /// similar to U2-associated SR140 protein ///  
similar to U2-associated SR140 protein /// similar to U2-associated SR140 protein  
3110040M04Rik /// LOC668050 /// LOC668055 /// LOC671025 /// LOC671035 /// LOC671043 ///  
LOC671049 /// LOC676755 /// LOC676758  
1429701\_at 1.01752 RIKEN cDNA 2410003J06 gene 2410003J06Rik  
1429702\_at 2.18015 RIKEN cDNA 2900072G11 gene 2900072G11Rik  
1429703\_at 2.09242 RIKEN cDNA 2900072G11 gene 2900072G11Rik  
1429704\_at 1.00860 Lrp2 binding protein Lrp2bp  
1429705\_at 0.99587 sperm acrosome associated 4 Spaca4  
1429706\_at 0.96311 IQ motif containing F5 Iqcf5  
1429707\_at 1.16386 "phospholipase A2, activating protein" Plaa  
1429708\_at 0.94797 NADH dehydrogenase (ubiquinone) 1 alpha subcomplex 11 Ndufa11  
1429709\_at 0.99732 peptidase (mitochondrial processing) beta Pmpcb  
1429710\_at 1.08540 phosphoserine/threonine/tyrosine interaction protein Styx  
1429711\_at 1.03855 phosphoserine/threonine/tyrosine interaction protein Styx  
1429712\_at 1.10707 ethanol induced 1 /// RIKEN cDNA 6230416C02 gene /// similar to zinc finger  
protein 97 /// similar to zinc finger protein 97 Etoh1 /// 6230416C02Rik /// LOC667962 ///  
LOC668009  
1429713\_at 0.87333 sulfatase modifying factor 2 Sumf2  
1429714\_at 0.94993 sulfatase modifying factor 2 Sumf2

1429715\_at 1.01688 "protein phosphatase 2 (formerly 2A), regulatory subunit B (PR 52), alpha isoform" Ppp2r2a

1429716\_at 1.07503 "zinc finger, CCHC domain containing 4" Zcchc4

1429717\_at 1.02169 importin 11 Ipo11

1429718\_at 0.93558 "SLIT and NTRK-like family, member 5" Slitrk5

1429719\_at 0.86730 forkhead box P4 Foxp4

1429720\_at 0.93203 "MAK10 homolog, amino-acid N-acetyltransferase subunit, (*S. cerevisiae*)" Mak10

1429721\_s\_at 0.91263 RIKEN cDNA 4930579C15 gene 4930579C15Rik

1429722\_at 0.88860 zinc finger and BTB domain containing 4 Zbtb4

1429723\_at 1.10829 RIKEN cDNA 6330409N04 gene 6330409N04Rik

1429724\_at 1.09351 PRP4 pre-mRNA processing factor 4 homolog (yeast) Prpf4

1429725\_at 1.20906 AT motif binding factor 1 Atbf1

1429726\_at 0.96630 "solute carrier family 16 (monocarboxylic acid transporters), member 9" Slc16a9

1429727\_at 1.01765 "solute carrier family 16 (monocarboxylic acid transporters), member 9" Slc16a9

1429728\_at 1.10415 RIKEN cDNA 4930429M06Rik 4930429M06Rik

1429729\_at 0.86864 synaptotagmin XI Syt11

1429730\_at 1.01592 RIKEN cDNA 1810009N02 gene 1810009N02Rik

1429731\_at 1.08857 RIKEN cDNA 6530403G13 gene 6530403G13Rik

1429732\_at 1.06101 "protein phosphatase 1, regulatory (inhibitor) subunit 1C" Ppp1r1c

1429733\_at 0.94842 coiled-coil domain containing 94 Ccdc94

1429734\_at 1.08364 RIKEN cDNA 4632434I11 gene 4632434I11Rik

1429735\_at 1.14176 RIKEN cDNA 1110003F05 gene 1110003F05Rik

1429736\_at 0.90973 RIKEN cDNA 1110003F05 gene 1110003F05Rik

1429737\_a\_at 1.11856 cardiolipin synthase 1 Crls1

1429738\_at 1.02426 myelin transcription factor 1-like Myt11

1429739\_a\_at 0.81779 zinc finger protein 278 Zfp278

1429740\_at 0.91381 tetratricopeptide repeat domain 7 Ttc7

1429741\_at 1.05872 "potassium channel, subfamily V, member 1" Kcnv1

1429742\_at 1.09395 regulator of chromosome condensation (RCC1) and BTB (POZ) domain containing protein 2 Rcbtb2

1429743\_at 1.06221 RIKEN cDNA 6720468P15 gene 6720468P15Rik

1429744\_at 0.88577 RIKEN cDNA 4931407G18 gene 4931407G18Rik

1429745\_at 0.87141 similar to melanoma ubiquitous mutated protein /// similar to UBE-1C2 protein /// similar to UBE-1C2 protein /// hypothetical protein LOC574404 /// hypothetical protein LOC574405 /// similar to melanoma associated antigen (mutated) 1-like 1 LOC434795 /// LOC434797 /// LOC546325 /// MGC106740 /// LOC574405 /// LOC674060

1429746\_at 1.10728 RIKEN cDNA 1700007I06 gene 1700007I06Rik

1429747\_at 0.88018 RIKEN cDNA 1700009N14 gene 1700009N14Rik

1429748\_at 1.05733 --- ---

1429749\_at 0.93939 RIKEN cDNA 9330180L21 gene 9330180L21Rik

1429750\_at 1.19041 multiple inositol polyphosphate histidine phosphatase 1 Minpp1

1429751\_at 1.00903 "zinc finger, SWIM domain containing 2" Zswim2

1429752\_x\_at 0.97976 restin-like 2 Rsnl2  
1429753\_at 0.97964 neurexophilin 4 Nxph4  
1429754\_a\_at 0.92260 RIKEN cDNA 4933406F09 gene 4933406F09Rik  
1429755\_a\_at 1.07527 RIKEN cDNA 4933406F09 gene 4933406F09Rik  
1429756\_at 1.01533 RIKEN cDNA 4931428F04 gene 4931428F04Rik  
1429757\_at 0.94895 RIKEN cDNA 1700094C09 gene 1700094C09Rik  
1429758\_at 1.16284 RIKEN cDNA 1700017B05 gene /// hypothetical protein LOC640563  
1700017B05Rik /// LOC640563  
1429759\_at 0.88950 ribosomal protein S6 kinase polypeptide 6 Rps6ka6  
1429760\_at 1.07644 ribosomal protein S6 kinase polypeptide 6 Rps6ka6  
1429761\_at 1.15875 reticulon 1 Rtn1  
1429762\_a\_at 1.03796 Bardet-Biedl syndrome 5 (human) Bbs5  
1429763\_at 1.12011 cornichon homolog 4 (Drosophila) Cnih4  
1429764\_at 0.96440 RIKEN cDNA 1500005K14 gene 1500005K14Rik  
1429765\_at 0.98268 RIKEN cDNA 1500005K14 gene 1500005K14Rik  
1429766\_at 0.87177 RIKEN cDNA 2810013P06 gene 2810013P06Rik  
1429767\_at 0.96225 RIKEN cDNA 2810013P06 gene 2810013P06Rik  
1429768\_at 0.91500 dystrobrevin alpha Dtna  
1429769\_at 0.89090 "protein geranylgeranyltransferase type I, beta subunit" Pgg1b  
1429770\_at 1.06988 "protein geranylgeranyltransferase type I, beta subunit" Pgg1b  
1429771\_at 1.22991 RIKEN cDNA 3110073H01 gene 3110073H01Rik  
1429772\_at 0.93484 plexin A2 Plxna2  
1429773\_at 1.04678 RIKEN cDNA 2810451A06 gene 2810451A06Rik  
1429774\_a\_at 0.99994 coiled-coil domain containing 98 Ccdc98  
1429775\_a\_at 1.08229 G protein-coupled receptor 137B /// similar to transmembrane 7 superfamily  
member 1 /// similar to transmembrane 7 superfamily member 1 Gpr137b /// LOC664862 ///  
LOC673335  
1429776\_a\_at 0.91425 "DnaJ (Hsp40) homolog, subfamily B, member 6" Dnajb6  
1429777\_at 0.99693 "DnaJ (Hsp40) homolog, subfamily B, member 6" Dnajb6  
1429778\_at 1.01057 optineurin Optn  
1429779\_at 1.07320 "eukaryotic translation initiation factor 2C, 4" Eif2c4  
1429780\_at 1.00985 coiled-coil domain containing 39 Ccdc39  
1429781\_s\_at 1.00695 coiled-coil domain containing 39 Ccdc39  
1429782\_at 1.11576 "gene rich cluster, C10 gene" Grcc10  
1429783\_at 1.01381 PDZ and LIM domain 5 Pdlim5  
1429784\_at 1.99801 RIKEN cDNA C130032J12 gene C130032J12Rik  
1429785\_at 0.90973 RIKEN cDNA 5830458C19 gene 5830458C19Rik  
1429786\_a\_at 1.02272 ZW10 interactor Zwint  
1429787\_x\_at 1.08461 ZW10 interactor Zwint  
1429788\_at 1.04512 actin related protein M1 Arpm1  
1429789\_at 0.94578 actin related protein M1 Arpm1  
1429790\_at 1.06198 "bruno-like 6, RNA binding protein (Drosophila) /// similar to bruno-like 6,  
RNA binding protein" Brunol6 /// LOC669789

|              |         |                                                                                                         |      |                     |
|--------------|---------|---------------------------------------------------------------------------------------------------------|------|---------------------|
| 1429791_at   | 0.86717 | RIKEN cDNA A930004D18                                                                                   | gene | A930004D18Rik       |
| 1429792_at   | 1.06681 | RIKEN cDNA 9530048O09                                                                                   | gene | 9530048O09Rik       |
| 1429793_at   | 0.96490 | RIKEN cDNA 1600014K23                                                                                   | gene | 1600014K23Rik       |
| 1429794_a_at | 1.01994 | "purinergic receptor P2X, ligand-gated ion channel, 1"                                                  |      | P2rx1               |
| 1429795_at   | 0.98146 | RIKEN cDNA 1700001L05                                                                                   | gene | 1700001L05Rik       |
| 1429796_at   | 0.99176 | "kalirin, RhoGEF kinase"                                                                                |      | Kalrn               |
| 1429797_at   | 1.32468 | RIKEN cDNA 5730596K20                                                                                   | gene | 5730596K20Rik       |
| 1429798_s_at | 1.01212 | CKLF-like MARVEL transmembrane domain containing 5                                                      |      | Cmtm5               |
| 1429799_at   | 0.91143 | zinc finger protein 606                                                                                 |      | Zfp606              |
| 1429800_at   | 0.99257 | RIKEN cDNA 9130221H12                                                                                   | gene | 9130221H12Rik       |
| 1429801_at   | 1.12072 | RIKEN cDNA 2310028H24                                                                                   | gene | 2310028H24Rik       |
| 1429802_at   | 0.94289 | dehydrogenase/reductase (SDR family) member 10                                                          |      | Dhrs10              |
| 1429803_at   | 1.13234 | RIKEN cDNA 1700021F07                                                                                   | gene | 1700021F07Rik       |
| 1429804_at   | 1.00137 | "solute carrier family 22 (organic cation transporter), member 16"                                      |      | Slc22a16            |
| 1429805_at   | 1.02219 | myosin IA /// similar to Myosin Ia (Brush border myosin I) (BBM-I) (BBMI) (Myosin I heavy chain) (MIHC) |      | Myo1a /// LOC674795 |
| 1429806_at   | 1.26972 | Era (G-protein)-like 1 (E. coli)                                                                        |      | Eral1               |
| 1429807_at   | 0.95094 | RIKEN cDNA 1700011H22                                                                                   | gene | 1700011H22Rik       |
| 1429808_at   | 0.89540 | RIKEN cDNA 1110020C03                                                                                   | gene | 1110020C03Rik       |
| 1429809_at   | 0.87819 | transmembrane and tetratricopeptide repeat containing 2                                                 |      | Tmtc2               |
| 1429810_at   | 1.48811 | RIKEN cDNA 4921505C17                                                                                   | gene | 4921505C17Rik       |
| 1429811_at   | 1.02516 | RIKEN cDNA 4933424B01                                                                                   | gene | 4933424B01Rik       |
| 1429812_at   | 1.16452 | RIKEN cDNA 2610002D18                                                                                   | gene | 2610002D18Rik       |
| 1429813_at   | 1.00703 | pantothenate kinase 1                                                                                   |      | Pank1               |
| 1429814_at   | 1.01140 | pantothenate kinase 1                                                                                   |      | Pank1               |
| 1429815_at   | 1.09775 | armadillo repeat containing 3                                                                           |      | Armc3               |
| 1429816_at   | 0.95217 | armadillo repeat containing 3                                                                           |      | Armc3               |
| 1429817_at   | 1.07772 | spermatogenesis and oogenesis specific basic helix-loop-helix 2                                         |      | Sohlh2              |
| 1429818_at   | 0.91529 | RIKEN cDNA 2410012M07                                                                                   | gene | 2410012M07Rik       |
| 1429819_at   | 1.01051 | nicotinamide nucleotide adenylyltransferase 1                                                           |      | Nmnat1              |
| 1429820_at   | 1.02814 | RUN and TBC1 domain containing 2                                                                        |      | Rutbc2              |
| 1429821_at   | 1.15911 | RIKEN cDNA 2810046L04                                                                                   | gene | 2810046L04Rik       |
| 1429822_at   | 1.75026 | RIKEN cDNA 4633401B06                                                                                   | gene | 4633401B06Rik       |
| 1429823_at   | 0.90728 | RIKEN cDNA 5430420E18                                                                                   | gene | 5430420E18Rik       |
| 1429824_at   | 1.01531 | RIKEN cDNA 4930550C14                                                                                   | gene | 4930550C14Rik       |
| 1429825_at   | 0.88784 | RIKEN cDNA 1700030E15                                                                                   | gene | 1700030E15Rik       |
| 1429826_at   | 0.95004 | prolactin-like protein N                                                                                |      | Prlpn               |
| 1429827_at   | 0.97806 | RIKEN cDNA 1700010B08                                                                                   | gene | 1700010B08Rik       |
| 1429828_at   | 1.05280 | RIKEN cDNA 1700024P04                                                                                   | gene | 1700024P04Rik       |
| 1429829_at   | 0.94317 | RIKEN cDNA 9530003J23                                                                                   | gene | 9530003J23Rik       |
| 1429830_a_at | 0.90688 | CD59a antigen                                                                                           |      | Cd59a               |
| 1429831_at   | 1.10210 | phosphoinositide-3-kinase adaptor protein 1                                                             |      | Pik3ap1             |
| 1429832_at   | 1.21608 | peptidyl prolyl isomerase H /// similar to peptidyl prolyl isomerase H ///                              |      |                     |



hypothetical protein LOC624822 /// similar to Peptidyl-prolyl cis-trans isomerase H (PPIase H) (Rotamase H) /// similar to peptidylprolyl isomerase H /// similar to Peptidyl-prolyl cis-trans isomerase H (PPIase H) (Rotamase H) /// similar to peptidylprolyl isomerase H /// similar to peptidylprolyl isomerase H /// similar to peptidylprolyl isomerase H /// similar to Peptidyl-prolyl cis-trans isomerase H (PPIase H) (Rotamase H) /// similar to peptidylprolyl isomerase H Ppih /// LOC433064 /// LOC624822 /// LOC629952 /// LOC665989 /// LOC666411 /// LOC667598 /// LOC669441 /// LOC670964 /// LOC671009 /// LOC676493

1429833\_at 1.12194 "lymphocyte antigen 6 complex, locus G6E" Ly6g6e  
1429834\_a\_at 0.97935 RIKEN cDNA 1110014N23 gene 1110014N23Rik  
1429835\_at 0.92615 RIKEN cDNA 2310033E01 gene 2310033E01Rik  
1429836\_at 0.99403 UDP-glucose ceramide glucosyltransferase-like 2 Ugcgl2  
1429837\_at 0.92464 RIKEN cDNA 1700016D18 gene 1700016D18Rik  
1429838\_at 1.02488 sperm associated antigen 16 Spag16  
1429839\_a\_at 0.90100 YY1 associated factor 2 Yaf2  
1429840\_at 1.00935 RIKEN cDNA 4933439G12 gene 4933439G12Rik  
1429841\_at 0.99024 multiple EGF-like-domains 10 Megf10  
1429842\_at 0.92063 "malate dehydrogenase 1B, NAD (soluble)" Mdh1b  
1429843\_at 1.00830 glycine/arginine rich protein 1 Grp1  
1429844\_at 1.10758 RIKEN cDNA 2310043J07 gene 2310043J07Rik  
1429845\_at 0.99961 RIKEN cDNA 1700019L03 gene 1700019L03Rik  
1429846\_at 1.24726 RIKEN cDNA 9030411K21 gene 9030411K21Rik  
1429847\_a\_at 1.04131 RIKEN cDNA 4833418A01 gene 4833418A01Rik  
1429848\_at 1.03194 poliovirus receptor Pvr  
1429849\_at 1.34171 RIKEN cDNA 4632411B12 gene 4632411B12Rik  
1429850\_x\_at 0.89703 "alkB, alkylation repair homolog 4 (E. coli)" Alkbh4  
1429851\_at 1.03577 RIKEN cDNA 1700003M02 gene 1700003M02Rik  
1429852\_at 0.94454 coiled-coil domain containing 57 Ccdc57  
1429853\_at 0.89463 RIKEN cDNA 1700018C11 gene 1700018C11Rik  
1429854\_at 0.90051 RIKEN cDNA 2900092C05 gene 2900092C05Rik  
1429855\_at 1.03338 RIKEN cDNA 1700023I07 gene 1700023I07Rik  
1429856\_at 0.89035 tetraspanin 18 Tspan18  
1429857\_at 1.19030 RIKEN cDNA 2900092D14 gene 2900092D14Rik  
1429858\_at 1.13476 RIKEN cDNA 1700011E24 gene 1700011E24Rik  
1429859\_a\_at 0.99225 ADP-ribosylation factor-like 2 binding protein Arl2bp  
1429860\_at 1.03427 similar to RIKEN cDNA 5730590G19-like LOC677447  
1429861\_at 0.82119 protocadherin 9 /// similar to protocadherin 9 isoform 1 precursor Pcdh9 ///  
LOC638275  
1429862\_at 0.98894 "phospholipase A2, group IVE" Pla2g4e  
1429863\_at 1.10139 LON peptidase N-terminal domain and ring finger 3 Lonrf3  
1429864\_at 1.01957 spermatogenesis and centriole associated 1 Spatc1  
1429865\_at 0.99081 RIKEN cDNA 4931417G12 gene 4931417G12Rik  
1429866\_at 1.12476 AHNAK nucleoprotein (desmoyokin) Ahnak  
1429867\_at 0.95669 RIKEN cDNA 4933424C08 gene 4933424C08Rik

|              |                 |                                                                                                                 |
|--------------|-----------------|-----------------------------------------------------------------------------------------------------------------|
| 1429868_at   | 0.99246 --- --- |                                                                                                                 |
| 1429869_at   | 1.02242         | RIKEN cDNA 1110020C03 gene 1110020C03Rik                                                                        |
| 1429870_at   | 0.92230         | RIKEN cDNA C630040K21 gene C630040K21Rik                                                                        |
| 1429871_at   | 1.33672         | hyaluronan mediated motility receptor (RHAMM) Hmnr                                                              |
| 1429872_at   | 0.94536         | RIKEN cDNA 1700007N14 gene 1700007N14Rik                                                                        |
| 1429873_at   | 0.89687         | RIKEN cDNA 1700125H20 gene 1700125H20Rik                                                                        |
| 1429874_at   | 0.91239         | spermatogenesis associated 17 Spata17                                                                           |
| 1429875_at   | 0.95185         | RIKEN cDNA 1700034J05 gene /// hypothetical protein LOC635035<br>1700034J05Rik /// LOC635035                    |
| 1429876_at   | 0.92951         | suppressor of Ty 7 ( <i>S. cerevisiae</i> )-like Supt7l                                                         |
| 1429877_at   | 1.04379         | leucine rich repeat containing 44 Lrrc44                                                                        |
| 1429878_a_at | 0.97463         | nucleoporin like 1 Nupl1                                                                                        |
| 1429879_at   | 1.12479         | RIKEN cDNA 0610037L13 gene 0610037L13Rik                                                                        |
| 1429880_at   | 1.03002         | RIKEN cDNA 4921531C22 gene 4921531C22Rik                                                                        |
| 1429881_at   | 0.99290         | Rho GTPase activating protein 15 Arhgap15                                                                       |
| 1429882_at   | 1.80946         | RIKEN cDNA 2610005L07 gene 2610005L07Rik                                                                        |
| 1429883_at   | 1.28497         | actin-like 6A Actl6a                                                                                            |
| 1429884_at   | 0.93579         | SLIT-ROBO Rho GTPase activating protein 2 Srgap2                                                                |
| 1429885_at   | 1.06102         | RIKEN cDNA 4930431P19 gene 4930431P19Rik                                                                        |
| 1429886_at   | 0.88583         | zinc finger protein 294 Zfp294                                                                                  |
| 1429887_at   | 0.98173         | RIKEN cDNA 2310005C01 gene 2310005C01Rik                                                                        |
| 1429888_a_at | 0.88601         | heat shock protein 2 Hspb2                                                                                      |
| 1429889_at   | 0.89239         | Fas apoptotic inhibitory molecule 3 Faim3                                                                       |
| 1429890_at   | 1.00512         | RIKEN cDNA A930007D18 gene A930007D18Rik                                                                        |
| 1429891_at   | 0.98302         | calcyphosine-like Capsl                                                                                         |
| 1429892_at   | 1.05136         | PLAC8-like 1 Plac8l1                                                                                            |
| 1429893_at   | 0.98423         | RIKEN cDNA 2810004A10 gene 2810004A10Rik                                                                        |
| 1429894_a_at | 0.98929         | microtubule-associated protein 7 Mtap7                                                                          |
| 1429895_at   | 1.01351         | RIKEN cDNA 2310010G23 gene 2310010G23Rik                                                                        |
| 1429896_at   | 1.15316         | RIKEN cDNA 5830408B19 gene 5830408B19Rik                                                                        |
| 1429897_a_at | 1.07072         | "DNA segment, Chr 16, ERATO Doi 472, expressed" D16Ert472e                                                      |
| 1429898_at   | 1.22014         | RIKEN cDNA 2310008M10 gene 2310008M10Rik                                                                        |
| 1429899_at   | 0.89526         | RIKEN cDNA 5730414N17 gene 5730414N17Rik                                                                        |
| 1429900_at   | 2.87693         | RIKEN cDNA 5330406M23 gene 5330406M23Rik                                                                        |
| 1429901_at   | 1.07555         | T-cell lymphoma breakpoint associated target 1 Tcba1                                                            |
| 1429902_at   | 1.63161         | RIKEN cDNA 5830443J22 gene 5830443J22Rik                                                                        |
| 1429903_at   | 1.07990         | "gap junction membrane channel protein alpha 10 /// D4, zinc and double PHD<br>fingers family 2" Gja10 /// Dpf2 |
| 1429904_at   | 0.97108         | RIKEN cDNA 4930507A01 gene 4930507A01Rik                                                                        |
| 1429905_at   | 1.05400         | RIKEN cDNA 3110009O07 gene 3110009O07Rik                                                                        |
| 1429906_at   | 0.86405         | RIKEN cDNA A930035E12 gene A930035E12Rik                                                                        |
| 1429907_at   | 1.09049         | RIKEN cDNA 1700094D03 gene 1700094D03Rik                                                                        |
| 1429908_at   | 0.93668         | RIKEN cDNA 6530403A03 gene 6530403A03Rik                                                                        |

|              |         |                                                                                              |      |               |
|--------------|---------|----------------------------------------------------------------------------------------------|------|---------------|
| 1429909_at   | 0.79306 | RIKEN cDNA 4833411O04                                                                        | gene | 4833411O04Rik |
| 1429910_at   | 0.94323 | RIKEN cDNA 5730499H23                                                                        | gene | 5730499H23Rik |
| 1429911_at   | 1.14550 | "microcephaly, primary autosomal recessive 1"                                                |      | Mcph1         |
| 1429912_at   | 1.04744 | sperm associated antigen 4-like                                                              |      | Spag4l        |
| 1429913_at   | 0.98835 | "potassium channel, subfamily K, member 16"                                                  |      | Kcnk16        |
| 1429914_at   | 0.71766 | enhancer of polycomb homolog 1 (Drosophila)                                                  |      | Epc1          |
| 1429915_at   | 0.99074 | RIKEN cDNA 4930426L09                                                                        | gene | 4930426L09Rik |
| 1429916_at   | 0.94979 | RIKEN cDNA 9530077C05                                                                        | gene | 9530077C05Rik |
| 1429917_at   | 0.82253 | RIKEN cDNA 9030625N01                                                                        | gene | 9030625N01Rik |
| 1429918_at   | 0.92375 | Rho GTPase activating protein 20                                                             |      | Arhgap20      |
| 1429919_at   | 1.01281 | ankyrin repeat domain 48                                                                     |      | Ankrd48       |
| 1429920_at   | 1.11986 | RIKEN cDNA 4933403M22                                                                        | gene | 4933403M22Rik |
| 1429921_at   | 1.25580 | RIKEN cDNA 9530068E07                                                                        | gene | 9530068E07Rik |
| 1429922_at   | 1.06745 | "Sodium channel, voltage-gated, type IX, alpha"                                              |      | Scn9a         |
| 1429923_x_at | 0.97643 | spermatogenesis associated 3                                                                 |      | Spata3        |
| 1429924_at   | 1.07520 | RIKEN cDNA 1700019O17                                                                        | gene | 1700019O17Rik |
| 1429925_at   | 0.94125 | RIKEN cDNA 4933425B16                                                                        | gene | 4933425B16Rik |
| 1429926_at   | 1.26950 | RIKEN cDNA 6720473G16                                                                        | gene | 6720473G16Rik |
| 1429927_at   | 0.93945 | RIKEN cDNA 5830409B07                                                                        | gene | 5830409B07Rik |
| 1429928_at   | 1.20706 | RIKEN cDNA 1700030B21                                                                        | gene | 1700030B21Rik |
| 1429929_at   | 0.99044 | meiosis defective 1                                                                          |      | Mei1          |
| 1429930_at   | 0.91635 | coiled-coil domain containing 19                                                             |      | Ccdc19        |
| 1429931_at   | 0.91476 | RIKEN cDNA 4930553P18                                                                        | gene | 4930553P18Rik |
| 1429932_at   | 0.90563 | RIKEN cDNA 4930566F21                                                                        | gene | 4930566F21Rik |
| 1429933_at   | 0.90598 | ATP/GTP binding protein 1                                                                    |      | Agtpbp1       |
| 1429934_at   | 0.96386 | RIKEN cDNA 4930502E18                                                                        | gene | 4930502E18Rik |
| 1429935_at   | 0.94334 | lipocalin 12                                                                                 |      | Lcn12         |
| 1429936_at   | 0.95029 | RIKEN cDNA 2700059L22                                                                        | gene | 2700059L22Rik |
| 1429937_at   | 1.20059 | RIKEN cDNA D530033C11                                                                        | gene | D530033C11Rik |
| 1429938_at   | 0.99700 | RIKEN cDNA A930009E05                                                                        | gene | A930009E05Rik |
| 1429939_at   | 0.95807 | "SAPS domain family, member 3"                                                               |      | Saps3         |
| 1429940_at   | 0.86154 | "Vcell division cycle 73, Paf1/RNA polymerase II complex component, homolog (S. cerevisiae)" |      | Cdc73         |
| 1429941_at   | 0.89966 | RIKEN cDNA 2410193C02                                                                        | gene | 2410193C02Rik |
| 1429942_at   | 0.93815 | glucocorticoid modulatory element binding protein 1                                          |      | Gmeb1         |
| 1429943_at   | 0.88568 | "chitinase, di-N-acetyl-"                                                                    |      | Ctbs          |
| 1429944_at   | 1.00308 | trichohyalin-like 1                                                                          |      | Tchhl1        |
| 1429945_at   | 1.09714 | RIKEN cDNA 2810406K13                                                                        | gene | 2810406K13Rik |
| 1429946_at   | 1.05201 | RIKEN cDNA 2610301F02                                                                        | gene | 2610301F02Rik |
| 1429947_a_at | 1.07234 | Z-DNA binding protein 1                                                                      |      | Zbp1          |
| 1429948_x_at | 0.91735 | "crystallin, gamma F"                                                                        |      | Crygf         |
| 1429949_at   | 0.75128 | RIKEN cDNA 6530415H11                                                                        | gene | 6530415H11Rik |
| 1429950_at   | 0.95006 | unc-5 homolog C (C. elegans)-like                                                            |      | Unc5cl        |

|              |         |                                                          |                                                      |                             |
|--------------|---------|----------------------------------------------------------|------------------------------------------------------|-----------------------------|
| 1429951_at   | 1.60359 | single-stranded DNA binding protein 2                    | Ssbp2                                                |                             |
| 1429952_at   | 1.01914 | motile sperm domain containing 4                         | Mospd4                                               |                             |
| 1429953_at   | 0.84199 | RIKEN cDNA 2210011C24                                    | gene                                                 | 2210011C24Rik               |
| 1429954_at   | 1.01707 | "C-type lectin domain family 4, member a3"               | Clec4a3                                              |                             |
| 1429955_at   | 0.91893 | RIKEN cDNA 5031434O11                                    | gene                                                 | 5031434O11Rik               |
| 1429956_at   | 1.12594 | RIKEN cDNA 1700021K02                                    | gene                                                 | 1700021K02Rik               |
| 1429957_at   | 0.81350 | RIKEN cDNA 2310002B14                                    | gene                                                 | 2310002B14Rik               |
| 1429958_x_at | 1.24140 | hydroxyacylglutathione hydrolase-like                    | Haghl                                                |                             |
| 1429959_at   | 0.96954 | ---                                                      | ---                                                  |                             |
| 1429960_at   | 0.87641 | RIKEN cDNA 4930438A08                                    | gene                                                 | 4930438A08Rik               |
| 1429961_at   | 0.94151 | RIKEN cDNA 1700021C14                                    | gene                                                 | 1700021C14Rik               |
| 1429962_at   | 1.15035 | CCAAT/enhancer binding protein zeta                      | Cebpz                                                |                             |
| 1429963_at   | 1.37613 | mitogen-activated protein kinase 6                       | Mapk6                                                |                             |
| 1429964_at   | 1.04048 | RIKEN cDNA 5031420N21                                    | gene                                                 | 5031420N21Rik               |
| 1429965_at   | 0.96120 | LON peptidase N-terminal domain and ring finger 2        |                                                      | Lonrf2                      |
| 1429966_at   | 1.00841 | RIKEN cDNA 3110057O12                                    | gene                                                 | 3110057O12Rik               |
| 1429967_at   | 1.02209 | RIKEN cDNA 2600002B07                                    | gene                                                 | 2600002B07Rik               |
| 1429968_at   | 1.28914 | RIKEN cDNA 2310047L11                                    | gene                                                 | 2310047L11Rik               |
| 1429969_at   | 0.95092 | RIKEN cDNA 4833403J16                                    | gene                                                 | 4833403J16Rik               |
| 1429970_at   | 1.04771 | sperm acrosome associated 3                              | Spaca3                                               |                             |
| 1429971_at   | 0.97025 | thioredoxin reductase 2                                  | Txnrd2                                               |                             |
| 1429972_s_at | 0.90613 | thioredoxin reductase 2                                  | Txnrd2                                               |                             |
| 1429973_at   | 0.94560 | RIKEN cDNA 4921509B22                                    | gene                                                 | 4921509B22Rik               |
| 1429974_at   | 0.68642 | T-box18                                                  | Tbx18                                                |                             |
| 1429975_at   | 0.96936 | RIKEN cDNA 4931432M23                                    | gene /// similar to plasma kallikrein-like protein 4 | 4931432M23Rik /// LOC636530 |
| 1429976_at   | 0.88365 | CLIP associating protein 2                               | Clasp2                                               |                             |
| 1429977_at   | 1.00419 | RIKEN cDNA 9030425L15                                    | gene                                                 | 9030425L15Rik               |
| 1429978_at   | 0.95986 | RIKEN cDNA 5830467E07                                    | gene                                                 | 5830467E07Rik               |
| 1429979_a_at | 0.99462 | RIKEN cDNA 1810073N04                                    | gene                                                 | 1810073N04Rik               |
| 1429980_x_at | 0.96014 | RIKEN cDNA 1810073N04                                    | gene                                                 | 1810073N04Rik               |
| 1429981_a_at | 0.98625 | RIKEN cDNA 4933426K21                                    | gene                                                 | 4933426K21Rik               |
| 1429982_at   | 1.03893 | RIKEN cDNA 4933426K21                                    | gene                                                 | 4933426K21Rik               |
| 1429983_at   | 0.82395 | RIKEN cDNA 2010002M09                                    | gene                                                 | 2010002M09Rik               |
| 1429984_at   | 1.07535 | RIKEN cDNA 5730455O13                                    | gene                                                 | 5730455O13Rik               |
| 1429985_at   | 0.95520 | RIKEN cDNA 5430439G13                                    | gene                                                 | 5430439G13Rik               |
| 1429986_at   | 0.94971 | G-protein coupled receptor 173                           | Gpr173                                               |                             |
| 1429987_at   | 0.93245 | RIKEN cDNA 9930013L23                                    | gene                                                 | 9930013L23Rik               |
| 1429988_at   | 0.89691 | zinc finger protein 235                                  | Zfp235                                               |                             |
| 1429989_at   | 0.85886 | RIKEN cDNA 1700008A04                                    | gene                                                 | 1700008A04Rik               |
| 1429990_at   | 1.07391 | hyaluronoglucosaminidase 4                               | Hyal4                                                |                             |
| 1429991_at   | 1.08450 | Fez family zinc finger 1                                 | Fezf1                                                |                             |
| 1429992_at   | 1.04134 | spermatogenesis associated glutamate (E)-rich protein 4b |                                                      | Speer4b                     |

|              |         |                                                                                                                                                                                                                                                                                                                                                                                                                       |                                                                |
|--------------|---------|-----------------------------------------------------------------------------------------------------------------------------------------------------------------------------------------------------------------------------------------------------------------------------------------------------------------------------------------------------------------------------------------------------------------------|----------------------------------------------------------------|
| 1429993_s_at | 0.97482 | spermatogenesis associated glutamate (E)-rich protein 4b                                                                                                                                                                                                                                                                                                                                                              | Speer4b                                                        |
| 1429994_s_at | 1.05370 | "cytochrome P450, family 2, subfamily c, polypeptide 65"                                                                                                                                                                                                                                                                                                                                                              | Cyp2c65                                                        |
| 1429995_at   | 1.05415 | RIKEN cDNA 1700036D21 gene                                                                                                                                                                                                                                                                                                                                                                                            | 1700036D21Rik                                                  |
| 1429996_at   | 3.25059 | RIKEN cDNA 6330417A16 gene                                                                                                                                                                                                                                                                                                                                                                                            | 6330417A16Rik                                                  |
| 1429997_at   | 1.01714 | RIKEN cDNA 4832441B07 gene                                                                                                                                                                                                                                                                                                                                                                                            | 4832441B07Rik                                                  |
| 1429998_at   | 1.02429 | tripartite motif protein 23                                                                                                                                                                                                                                                                                                                                                                                           | Trim23                                                         |
| 1429999_at   | 1.00659 | RIKEN cDNA 4933403M19 gene                                                                                                                                                                                                                                                                                                                                                                                            | 4933403M19Rik                                                  |
| 1430000_at   | 1.23420 | RIKEN cDNA B230117O15 gene                                                                                                                                                                                                                                                                                                                                                                                            | B230117O15Rik                                                  |
| 1430001_at   | 1.01222 | interleukin 31                                                                                                                                                                                                                                                                                                                                                                                                        | Il31                                                           |
| 1430002_at   | 0.91457 | IQ motif containing F1                                                                                                                                                                                                                                                                                                                                                                                                | Iqcf1                                                          |
| 1430003_at   | 0.96802 | RIKEN cDNA 6330412A17 gene                                                                                                                                                                                                                                                                                                                                                                                            | 6330412A17Rik                                                  |
| 1430004_s_at | 0.96431 | WD repeat domain 20                                                                                                                                                                                                                                                                                                                                                                                                   | Wdr20                                                          |
| 1430005_a_at | 0.89171 | "basic leucine zipper transcription factor, ATF-like 2"                                                                                                                                                                                                                                                                                                                                                               | Batf2                                                          |
| 1430006_x_at | 1.06509 | RIKEN cDNA 1700024B05 gene                                                                                                                                                                                                                                                                                                                                                                                            | 1700024B05Rik                                                  |
| 1430007_a_at | 0.85397 | calcium-binding tyrosine-(Y)-phosphorylation regulated (fibrousheathin 2)                                                                                                                                                                                                                                                                                                                                             | Cabyr                                                          |
| 1430008_x_at | 1.00034 | "spermatogenesis associated glutamate (E)-rich protein 5, pseudogene 1"                                                                                                                                                                                                                                                                                                                                               | Speer5-ps1                                                     |
| 1430009_at   | 0.93507 | "heat shock transcription factor, Y linked 2"                                                                                                                                                                                                                                                                                                                                                                         | Hsfy2                                                          |
| 1430010_at   | 1.18575 | RIKEN cDNA 2810465G24 gene                                                                                                                                                                                                                                                                                                                                                                                            | 2810465G24Rik                                                  |
| 1430011_at   | 1.05612 | RIKEN cDNA 2610317O13 gene                                                                                                                                                                                                                                                                                                                                                                                            | 2610317O13Rik                                                  |
| 1430012_at   | 0.92385 | RIKEN cDNA 1110050K14 gene                                                                                                                                                                                                                                                                                                                                                                                            | 1110050K14Rik                                                  |
| 1430013_at   | 0.92269 | RIKEN cDNA 2210008F06 gene                                                                                                                                                                                                                                                                                                                                                                                            | 2210008F06Rik                                                  |
| 1430014_at   | 1.09891 | RIKEN cDNA 5430419D17 gene                                                                                                                                                                                                                                                                                                                                                                                            | 5430419D17Rik                                                  |
| 1430015_at   | 1.07120 | "peroxisomal, testis specific 1"                                                                                                                                                                                                                                                                                                                                                                                      | Pxt1                                                           |
| 1430016_at   | 0.99391 | RIKEN cDNA 4930584F24 gene                                                                                                                                                                                                                                                                                                                                                                                            | 4930584F24Rik                                                  |
| 1430017_at   | 1.10014 | RIKEN cDNA 1600016N20 gene                                                                                                                                                                                                                                                                                                                                                                                            | 1600016N20Rik                                                  |
| 1430018_at   | 0.89441 | CDC42 effector protein (Rho GTPase binding) 5                                                                                                                                                                                                                                                                                                                                                                         | Cdc42ep5                                                       |
| 1430019_a_at | 1.07442 | heterogeneous nuclear ribonucleoprotein A1 /// heterogeneous nuclear ribonucleoprotein A1 pseudogene /// heterogeneous nuclear ribonucleoprotein A1 pseudogene /// heterogeneous nuclear ribonucleoprotein A1 pseudogene /// similar to Heterogeneous nuclear ribonucleoprotein A1 (Helix-destabilizing protein) (Single-strand binding protein) (hnRNP core protein A1) (HDP-1) (Topoisomerase-inhibitor suppressed) | Hnrpa1 /// LOC225307 /// LOC434858 /// LOC654467 /// LOC665646 |
| 1430020_x_at | 1.10213 | heterogeneous nuclear ribonucleoprotein A1                                                                                                                                                                                                                                                                                                                                                                            | Hnrpa1                                                         |
| 1430021_a_at | 1.08087 | ubiquitin-like 1 (sentrin) activating enzyme E1A                                                                                                                                                                                                                                                                                                                                                                      | Uble1a                                                         |
| 1430022_at   | 0.94328 | ubiquitin-like 1 (sentrin) activating enzyme E1A                                                                                                                                                                                                                                                                                                                                                                      | Uble1a                                                         |
| 1430023_at   | 1.04291 | RIKEN cDNA 5133400G04 gene                                                                                                                                                                                                                                                                                                                                                                                            | 5133400G04Rik                                                  |
| 1430024_at   | 1.07354 | "Yip1 domain family, member 6"                                                                                                                                                                                                                                                                                                                                                                                        | Yipf6                                                          |
| 1430025_at   | 0.94283 | "protein phosphatase 3, catalytic subunit, gamma isoform"                                                                                                                                                                                                                                                                                                                                                             | Ppp3cc                                                         |
| 1430026_at   | 0.99500 | "stress 70 protein chaperone, microsome-associated, human homolog"                                                                                                                                                                                                                                                                                                                                                    | Stch                                                           |
| 1430027_at   | 1.04608 | RIKEN cDNA 1810028F09 gene                                                                                                                                                                                                                                                                                                                                                                                            | 1810028F09Rik                                                  |
| 1430028_at   | 1.01217 | RIKEN cDNA 2210018M11 gene                                                                                                                                                                                                                                                                                                                                                                                            | 2210018M11Rik                                                  |

|              |         |                                                     |         |               |
|--------------|---------|-----------------------------------------------------|---------|---------------|
| 1430029_a_at | 0.93874 | tetraspanin 31                                      | Tspan31 |               |
| 1430030_at   | 1.28130 | RIKEN cDNA 5330426P16                               | gene    | 5330426P16Rik |
| 1430031_at   | 0.87709 | inositol polyphosphate multikinase                  | Ipmk    |               |
| 1430032_at   | 0.81723 | RNA binding motif protein 4B                        | Rbm4b   |               |
| 1430033_at   | 1.46525 | RIKEN cDNA 5330431K02                               | gene    | 5330431K02Rik |
| 1430034_at   | 1.04447 | chaperonin subunit 4 (delta)                        | Cct4    |               |
| 1430035_at   | 1.05646 | RIKEN cDNA 1700034M03                               | gene    | 1700034M03Rik |
| 1430036_at   | 1.01429 | RIKEN cDNA 2310015B20                               | gene    | 2310015B20Rik |
| 1430037_at   | 1.06914 | sorting nexin family member 27                      | Snx27   |               |
| 1430038_at   | 0.98335 | gephyrin                                            | Gphn    |               |
| 1430039_at   | 0.93565 | CDK5 regulatory subunit associated protein 1-like 1 | Cdkal1  |               |
| 1430040_at   | 0.86464 | heat shock protein 12A                              | Hspa12a |               |
| 1430041_at   | 1.12700 | RIKEN cDNA 6330548G22                               | gene    | 6330548G22Rik |
| 1430042_at   | 1.24439 | RIKEN cDNA A930012M21                               | gene    | A930012M21Rik |
| 1430043_at   | 1.70833 | tetratricopeptide repeat domain 19                  | Ttc19   |               |
| 1430044_at   | 0.96491 | RIKEN cDNA 4930415F15                               | gene    | 4930415F15Rik |
| 1430045_at   | 1.08124 | translin-associated factor X                        | Tsnax   |               |
| 1430046_at   | 1.08436 | OTU domain containing 3                             | Otud3   |               |
| 1430047_at   | 1.00624 | BRCT domain containing 1                            | Brctd1  |               |
| 1430048_at   | 1.04080 | RIKEN cDNA 7630402I04                               | gene    | 7630402I04Rik |
| 1430049_at   | 1.04843 | RIKEN cDNA 4932701A20                               | gene    | 4932701A20Rik |
| 1430050_at   | 1.06097 | DEAD (Asp-Glu-Ala-Asp) box polypeptide 23           | Ddx23   |               |
| 1430051_at   | 1.07542 | RIKEN cDNA 4930486L24                               | gene    | 4930486L24Rik |
| 1430052_at   | 1.05666 | RIKEN cDNA C030048H21                               | gene    | C030048H21Rik |
| 1430053_a_at | 1.17240 | RIKEN cDNA 2810409H07                               | gene    | 2810409H07Rik |
| 1430054_at   | 0.98185 | RIKEN cDNA 1700030F18                               | gene    | 1700030F18Rik |
| 1430055_at   | 0.93305 | RIKEN cDNA 1700080G18                               | gene    | 1700080G18Rik |
| 1430056_at   | 1.00670 | RIKEN cDNA D130059P03                               | gene    | D130059P03Rik |
| 1430057_s_at | 0.87004 | leucine rich repeat containing 57                   | Lrrc57  |               |
| 1430058_at   | 1.86700 | stem-loop binding protein                           | Slbp    |               |
| 1430059_at   | 1.15877 | WD repeat domain 40A                                | Wdr40a  |               |
| 1430060_at   | 1.00317 | RIKEN cDNA 1700034G24                               | gene    | 1700034G24Rik |
| 1430061_at   | 0.99094 | RIKEN cDNA 1700105P06                               | gene    | 1700105P06Rik |
| 1430062_at   | 1.04826 | RIKEN cDNA 1600002O04                               | gene    | 1600002O04Rik |
| 1430063_at   | 0.98107 | RIKEN cDNA 4930571K23                               | gene    | 4930571K23Rik |
| 1430064_at   | 1.13938 | RIKEN cDNA 4933424A20                               | gene    | 4933424A20Rik |
| 1430065_at   | 1.00969 | RIKEN cDNA A930005N03                               | gene    | A930005N03Rik |
| 1430066_at   | 0.93618 | RIKEN cDNA 4930589M24                               | gene    | 4930589M24Rik |
| 1430067_at   | 1.00858 | RIKEN cDNA 5430401F13                               | gene    | 5430401F13Rik |
|              |         | 5430401F13Rik                                       | ///     | LOC625758     |
| 1430068_at   | 1.00892 | RIKEN cDNA C030011L09                               | gene    | C030011L09Rik |
| 1430069_at   | 1.00130 | RIKEN cDNA 4921517L17                               | gene    | 4921517L17Rik |
| 1430070_at   | 1.01498 | RIKEN cDNA 1500035N22                               | gene    | 1500035N22Rik |

|              |         |                                                        |         |               |
|--------------|---------|--------------------------------------------------------|---------|---------------|
| 1430071_at   | 1.03469 | brain protein 44                                       | Brp44   |               |
| 1430072_at   | 0.97376 | RIKEN cDNA 1700057K13                                  | gene    | 1700057K13Rik |
| 1430073_at   | 1.02355 | RIKEN cDNA 2900016B01                                  | gene    | 2900016B01Rik |
| 1430074_x_at | 1.10887 | RIKEN cDNA 8430426H19                                  | gene    | 8430426H19Rik |
| 1430075_at   | 1.56313 | "splicing factor 3b, subunit 3"                        | Sf3b3   |               |
| 1430076_at   | 0.99078 | coiled-coil domain containing 116                      | Ccdc116 |               |
| 1430077_at   | 1.27437 | "splicing factor, arginine/serine-rich 11"             | Sfrs11  |               |
| 1430078_a_at | 0.94337 | 8-oxoguanine DNA-glycosylase 1                         | Ogg1    |               |
| 1430079_at   | 1.01615 | RIKEN cDNA 5033406O09                                  | gene    | 5033406O09Rik |
| 1430080_at   | 1.06059 | ficolin B                                              | Fcnb    |               |
| 1430081_at   | 0.94559 | PHD finger protein 15                                  | Phf15   |               |
| 1430082_at   | 0.84237 | RIKEN cDNA 4930511H01                                  | gene    | 4930511H01Rik |
| 1430083_at   | 0.77669 | RIKEN cDNA 2610307P16                                  | gene    | 2610307P16Rik |
| 1430084_at   | 1.03879 | TLC domain containing 1                                | Tlcd1   |               |
| 1430085_at   | 1.07244 | RIKEN cDNA 4933412A08                                  | gene    | 4933412A08Rik |
| 1430086_at   | 1.02357 | "cholinergic receptor, nicotinic, alpha polypeptide 9" | Chrna9  |               |
| 1430087_at   | 0.92359 | "NTPase, KAP family P-loop domain containing 1"        | Nkpd1   |               |
| 1430088_at   | 0.96255 | RIKEN cDNA 3000002G13                                  | gene    | 3000002G13Rik |
| 1430089_at   | 2.42141 | RIKEN cDNA 5830469G19                                  | gene    | 5830469G19Rik |
| 1430090_at   | 0.98402 | coiled coil domain containing 28B                      | Ccdc28b |               |
| 1430091_at   | 1.00126 | RIKEN cDNA 1700001P01                                  | gene    | 1700001P01Rik |
| 1430092_at   | 1.13481 | serine active site containing 1                        | Serac1  |               |
| 1430093_at   | 0.98571 | RIKEN cDNA 4933406P04                                  | gene    | 4933406P04Rik |
| 1430094_at   | 1.15032 | RIKEN cDNA 4931440L10                                  | gene    | 4931440L10Rik |
| 1430095_at   | 1.02534 | RIKEN cDNA 1500017I17                                  | gene    | 1500017I17Rik |
| 1430096_at   | 0.96431 | RIKEN cDNA 2900017F05                                  | gene    | 2900017F05Rik |
| 1430097_at   | 1.24961 | RIKEN cDNA 8430436C05                                  | gene    | 8430436C05Rik |
| 1430098_at   | 0.97102 | RIKEN cDNA 6330409D20                                  | gene    | 6330409D20Rik |
| 1430099_at   | 0.96874 | RIKEN cDNA 4930509E16                                  | gene    | 4930509E16Rik |
| 1430100_at   | 1.06160 | mitochondrial ribosomal protein S15                    | Mrps15  |               |
| 1430101_at   | 0.93042 | RIKEN cDNA 6330406O05                                  | gene    | 6330406O05Rik |
| 1430102_at   | 0.91845 | ring finger protein 148                                | Rnf148  |               |
| 1430103_at   | 1.00430 | RIKEN cDNA 9030607L20                                  | gene    | 9030607L20Rik |
| 1430104_at   | 0.96277 | R-spondin 2 homolog ( <i>Xenopus laevis</i> )          | Rspo2   |               |
| 1430105_at   | 0.88453 | RIKEN cDNA 1700042O10                                  | gene    | 1700042O10Rik |
| 1430106_at   | 1.01808 | RIKEN cDNA 1700126L10                                  | gene    | 1700126L10Rik |
| 1430107_at   | 1.12589 | RIKEN cDNA 9230116B18                                  | gene    | 9230116B18Rik |
| 1430108_at   | 1.04609 | RIKEN cDNA 9030622M22                                  | gene    | 9030622M22Rik |
| 1430109_at   | 1.61961 | RIKEN cDNA 4833412E19                                  | gene    | 4833412E19Rik |
| 1430110_at   | 1.07560 | RIKEN cDNA D230044M03                                  | gene    | D230044M03Rik |
| 1430111_a_at | 1.01863 | "branched chain aminotransferase 1, cytosolic"         | Bcat1   |               |
| 1430112_at   | 0.93389 | WD repeat domain 66                                    | Wdr66   |               |
| 1430113_at   | 0.91319 | RIKEN cDNA 4933424C13                                  | gene    | 4933424C13Rik |

|              |         |                                                                |      |               |
|--------------|---------|----------------------------------------------------------------|------|---------------|
| 1430114_at   | 0.95080 | RIKEN cDNA 5430420C16                                          | gene | 5430420C16Rik |
| 1430115_at   | 1.19144 | RIKEN cDNA 4833413E03                                          | gene | 4833413E03Rik |
| 1430116_at   | 1.01944 | RIKEN cDNA 6030422M01                                          | gene | 6030422M01Rik |
| 1430117_a_at | 0.89512 | zinc finger protein 64                                         |      | Zfp64         |
| 1430118_at   | 0.88716 | RIKEN cDNA 2700046A07                                          | gene | 2700046A07Rik |
| 1430119_at   | 0.90720 | fibronectin type III domain containing 1                       |      | Fndc1         |
| 1430120_at   | 0.92898 | RIKEN cDNA 4930519G04                                          | gene | 4930519G04Rik |
| 1430121_at   | 0.97520 | RIKEN cDNA 1700006E09                                          | gene | 1700006E09Rik |
| 1430122_at   | 1.11445 | RIKEN cDNA 9430002A10                                          | gene | 9430002A10Rik |
| 1430123_a_at | 0.95645 | "aldo-keto reductase family 1, member A4 (aldehyde reductase)" |      | Akr1a4        |
| 1430124_x_at | 0.93893 | "aldo-keto reductase family 1, member A4 (aldehyde reductase)" |      | Akr1a4        |
| 1430125_s_at | 0.72378 | PQ loop repeat containing 1                                    |      | Pqlc1         |
| 1430126_at   | 0.88624 | RIKEN cDNA 2310035C23                                          | gene | 2310035C23Rik |
| 1430127_a_at | 1.05984 | cyclin D2                                                      |      | Ccnd2         |
| 1430128_a_at | 0.89874 | receptor accessory protein 6                                   |      | Reep6         |
| 1430129_a_at | 1.01274 | COMM domain containing 8                                       |      | Commd8        |
| 1430130_at   | 1.00223 | von Willebrand factor C and EGF domains                        |      | Vwce          |
| 1430131_at   | 0.98245 | complement receptor related protein                            |      | Crry          |
| 1430132_at   | 1.00093 | keratin 28                                                     |      | Krt28         |
| 1430133_at   | 1.06509 | "TBC1 domain family, member 8B"                                |      | Tbc1d8b       |
| 1430134_a_at | 1.03772 | tyrosyl-tRNA synthetase 2 (mitochondrial)                      |      | Yars2         |
| 1430135_at   | 0.95130 | deoxyribonuclease II alpha                                     |      | Dnase2a       |
| 1430136_at   | 1.00950 | "glutamate receptor, metabotropic 3"                           |      | Grm3          |
| 1430137_at   | 0.98279 | mitogen-activated protein kinase kinase kinase 13              |      | Map3k13       |
| 1430138_at   | 1.19688 | "CD3E antigen, epsilon polypeptide associated protein"         |      | Cd3eap        |
| 1430139_at   | 1.05706 | "helicase, lymphoid specific"                                  |      | Hells         |
| 1430140_at   | 0.94340 | RIKEN cDNA 1700017N19                                          | gene | 1700017N19Rik |
| 1430141_at   | 1.10059 | RIKEN cDNA 1200015N20                                          | gene | 1200015N20Rik |
| 1430142_at   | 0.98631 | transglutaminase 5                                             |      | Tgm5          |
| 1430143_at   | 1.03434 | RIKEN cDNA 4930426D05                                          | gene | 4930426D05Rik |
| 1430144_at   | 1.11194 | RIKEN cDNA 5830411G16                                          | gene | 5830411G16Rik |
| 1430145_at   | 1.06233 | leucine rich repeat containing 28                              |      | Lrrc28        |
| 1430146_at   | 1.05173 | RIKEN cDNA 4933402N03                                          | gene | 4933402N03Rik |
| 1430147_a_at | 1.11450 | Josephin domain containing 3                                   |      | Josd3         |
| 1430148_at   | 1.05479 | "RAB19, member RAS oncogene family"                            |      | Rab19         |
| 1430149_at   | 1.08342 | "NADH dehydrogenase (ubiquinone) 1 alpha subcomplex, 3"        |      | Ndufa3        |
| 1430150_at   | 1.06543 | DCP2 decapping enzyme homolog (S. cerevisiae)                  |      | Dcp2          |
| 1430151_at   | 1.85976 | nischarin                                                      |      | Nisch         |
| 1430152_at   | 1.43956 | epidermal growth factor receptor pathway substrate 15          |      | Eps15         |
| 1430153_at   | 0.92820 | tropomodulin 2                                                 |      | Tmod2         |
| 1430154_at   | 1.02337 | RIKEN cDNA 4930543C13                                          | gene | 4930543C13Rik |
| 1430155_at   | 1.04495 | RIKEN cDNA 4933427E11                                          | gene | 4933427E11Rik |
| 1430156_at   | 1.02217 | RIKEN cDNA 4930520O04                                          | gene | 4930520O04Rik |



1430157\_at 1.08350 RIKEN cDNA 1700095J03 gene 1700095J03Rik  
1430158\_at 1.18194 RIKEN cDNA 3110021A11 gene 3110021A11Rik  
1430159\_at 1.40498 RIKEN cDNA 5830408C22 gene 5830408C22Rik  
1430160\_at 1.00015 ankyrin repeat and IBR domain containing 1 Ankib1  
1430161\_at 1.10791 dihydrolipoamide S-succinyltransferase (E2 component of 2-oxo-glutarate complex) Dlst  
1430162\_at 0.84731 RIKEN cDNA 3830417A13 gene 3830417A13Rik  
1430163\_at 1.03963 RIKEN cDNA 1810048P08 gene 1810048P08Rik  
1430164\_a\_at 1.11084 growth factor receptor bound protein 10 Grb10  
1430165\_at 1.09840 serine/threonine kinase 17b (apoptosis-inducing) Stk17b  
1430166\_at 0.98314 RIKEN cDNA 1700042D18 gene 1700042D18Rik  
1430167\_a\_at 0.95026 RWD domain containing 3 Rwdd3  
1430168\_at 1.07129 "CSA-conditional, T cell activation-dependent protein" Cstad  
1430169\_at 0.92068 RIKEN cDNA 1700007K09 gene 1700007K09Rik  
1430170\_at 0.83822 Bardet-Biedl syndrome 10 (human) Bbs10  
1430171\_at 1.29306 fibroblast growth factor (acidic) intracellular binding protein Fibp  
1430172\_a\_at 0.83974 "cytochrome P450, family 4, subfamily f, polypeptide 16 /// similar to cytochrome P450, family 4, subfamily f, polypeptide 16 /// similar to cytochrome P450, family 4, subfamily f, polypeptide 16" Cyp4f16 /// LOC623748 /// LOC677156  
1430173\_x\_at 1.09153 "cytochrome P450, family 4, subfamily f, polypeptide 16" Cyp4f16  
1430174\_at 0.96614 RIKEN cDNA A930010G16 gene A930010G16Rik  
1430175\_at 1.03418 RIKEN cDNA 4930588G05 gene 4930588G05Rik  
1430176\_at 0.94831 RIKEN cDNA 5430433E21 gene 5430433E21Rik  
1430177\_at 1.12680 "ubiquitin-conjugating enzyme E2B, RAD6 homology (S. cerevisiae)" Ube2b  
1430178\_at 1.01959 RIKEN cDNA 2810408A11 gene 2810408A11Rik  
1430179\_at 1.14692 RIKEN cDNA 4921507G05 gene 4921507G05Rik  
1430180\_at 1.43003 mitogen activated protein kinase kinase 5 Map2k5  
1430181\_at 1.03824 "H1 histone family, member N, testis-specific" H1fnt  
1430182\_a\_at 0.96975 RIKEN cDNA 1700006J14 gene 1700006J14Rik  
1430183\_at 2.48506 Pre B-cell leukemia transcription factor 1 Pbx1  
1430184\_at 1.06873 zinc finger protein 597 Zfp597  
1430185\_at 1.11426 RIKEN cDNA 5830460E08 gene 5830460E08Rik  
1430186\_at 1.01868 "odontogenic, ameloblast associated" Odam  
1430187\_at 0.93239 zinc finger protein 60 Zfp60  
1430188\_at 1.00204 RIKEN cDNA 1700037C18 gene 1700037C18Rik  
1430189\_at 1.03347 nucleolar protein 4 Nol4  
1430190\_at 0.89710 RIKEN cDNA 1700041C02 gene 1700041C02Rik  
1430191\_at 4.18034 RIKEN cDNA 9130004J05 gene 9130004J05Rik  
1430192\_at 1.07514 caspase 3 Casp3  
1430193\_at 0.90640 cancer susceptibility candidate 5 /// similar to cancer susceptibility candidate 5 isoform 2 Casc5 /// LOC677208  
1430194\_at 0.91074 RIKEN cDNA 1110018H23 gene 1110018H23Rik

|              |         |                                                                                       |      |               |
|--------------|---------|---------------------------------------------------------------------------------------|------|---------------|
| 1430195_at   | 2.61970 | RIKEN cDNA 2810043O03                                                                 | gene | 2810043O03Rik |
| 1430196_at   | 1.11850 | RIKEN cDNA 8430408J09                                                                 | gene | 8430408J09Rik |
| 1430197_a_at | 0.90746 | "phosphatidylinositol transfer protein, membrane-associated 2"                        |      | Pitpnm2       |
| 1430198_at   | 1.24668 | RIKEN cDNA 3110009F21                                                                 | gene | 3110009F21Rik |
| 1430199_at   | 1.01250 | RIKEN cDNA 1700007E05                                                                 | gene | 1700007E05Rik |
| 1430200_at   | 1.00671 | RIKEN cDNA 4930579D07                                                                 | gene | 4930579D07Rik |
| 1430201_at   | 1.24814 | RIKEN cDNA 9130017K11                                                                 | gene | 9130017K11Rik |
| 1430202_at   | 1.02647 | RIKEN cDNA 1700108F19                                                                 | gene | 1700108F19Rik |
| 1430203_at   | 0.95172 | ubiquitin specific peptidase 16                                                       |      | Usp16         |
| 1430204_at   | 0.99238 | RIKEN cDNA 5033425G24                                                                 | gene | 5033425G24Rik |
| 1430205_a_at | 1.00615 | cell division cycle 37 homolog (S. cerevisiae)-like 1                                 |      | Cdc3711       |
| 1430206_at   | 0.86392 | RIKEN cDNA 4933407L21                                                                 | gene | 4933407L21Rik |
| 1430207_at   | 1.09159 | RIKEN cDNA 4933437N03                                                                 | gene | 4933437N03Rik |
| 1430208_at   | 0.90144 | keratin 42                                                                            |      | Krt42         |
| 1430209_at   | 0.98289 | RIKEN cDNA 4930404H21                                                                 | gene | 4930404H21Rik |
| 1430210_at   | 1.19512 | RIKEN cDNA C330024D12                                                                 | gene | C330024D12Rik |
| 1430211_at   | 1.82800 | RIKEN cDNA 4930415O20                                                                 | gene | 4930415O20Rik |
| 1430212_at   | 0.84711 | zinc finger protein 712                                                               |      | Zfp712        |
| 1430213_at   | 0.84398 | regulator of chromosome condensation (RCC1) and BTB (POZ) domain containing protein 1 |      | Rcbtb1        |
| 1430214_a_at | 1.07681 | RIKEN cDNA 2610020H08                                                                 | gene | 2610020H08Rik |
| 1430215_at   | 0.81228 | RIKEN cDNA 2610020H08                                                                 | gene | 2610020H08Rik |
| 1430216_at   | 0.90196 | zinc finger protein 292                                                               |      | Zfp292        |
| 1430217_at   | 0.93392 | RIKEN cDNA 4921528H16                                                                 | gene | 4921528H16Rik |
| 1430218_at   | 1.03780 | RIKEN cDNA 4933424M12                                                                 | gene | 4933424M12Rik |
| 1430219_at   | 0.91433 | fused toes                                                                            |      | Fts           |
| 1430220_at   | 1.11491 | RIKEN cDNA 4833420G17                                                                 | gene | 4833420G17Rik |
| 1430221_at   | 0.95199 | RIKEN cDNA 9130008F23                                                                 | gene | 9130008F23Rik |
| 1430222_at   | 1.01621 | RIKEN cDNA 9130007G19                                                                 | gene | 9130007G19Rik |
| 1430223_at   | 0.81479 | RIKEN cDNA 4930442P07                                                                 | gene | 4930442P07Rik |
| 1430224_at   | 0.87572 | WAP four-disulfide core domain 3                                                      |      | Wfdc3         |
| 1430225_at   | 1.02453 | RIKEN cDNA 5730442G03                                                                 | gene | 5730442G03Rik |
| 1430226_at   | 1.05139 | X-linked lymphocyte-regulated 4C                                                      |      | Xlr4c         |
| 1430227_at   | 1.01562 | RIKEN cDNA 1700007I08                                                                 | gene | 1700007I08Rik |
| 1430228_at   | 2.05113 | denticleless homolog (Drosophila)                                                     |      | Dtl           |
| 1430229_at   | 0.94319 | RIKEN cDNA 6330416L11                                                                 | gene | 6330416L11Rik |
| 1430230_at   | 1.01150 | RCSD domain containing 1                                                              |      | Rcsd1         |
| 1430231_a_at | 0.74894 | centrosomal protein 70                                                                |      | Cep70         |
| 1430232_at   | 0.94847 | RIKEN cDNA 4933407E14                                                                 | gene | 4933407E14Rik |
| 1430233_a_at | 0.93093 | RIKEN cDNA 4933425K02                                                                 | gene | 4933425K02Rik |
| 1430234_at   | 1.00580 | ADP-ribosylation factor-like 14                                                       |      | Arl14         |
| 1430235_at   | 0.93917 | RIKEN cDNA 4933424G06                                                                 | gene | 4933424G06Rik |
| 1430236_s_at | 1.08440 | gasdermin 2                                                                           |      | Gsdm2         |

|              |         |                                                                     |               |  |
|--------------|---------|---------------------------------------------------------------------|---------------|--|
| 1430237_at   | 1.02103 | claudin 22                                                          | Cldn22        |  |
| 1430238_at   | 1.07043 | glutamic-oxaloacetic transaminase 1-like 1                          | Got111        |  |
| 1430239_at   | 0.98134 | RIKEN cDNA 5430421F17 gene                                          | 5430421F17Rik |  |
| 1430240_a_at | 1.03462 | calmegin                                                            | Clgn          |  |
| 1430241_at   | 0.88262 | F-box and leucine-rich repeat protein 17                            | Fbxl17        |  |
| 1430242_at   | 0.94771 | RWD domain containing 1                                             | Rwdd1         |  |
| 1430243_at   | 0.84155 | RIKEN cDNA 1700058C01 gene                                          | 1700058C01Rik |  |
| 1430244_at   | 1.22800 | RIKEN cDNA 4921509J17 gene                                          | 4921509J17Rik |  |
| 1430245_at   | 1.00237 | ---                                                                 | ---           |  |
| 1430246_at   | 1.03064 | RIKEN cDNA 4933406C10 gene                                          | 4933406C10Rik |  |
| 1430247_at   | 0.82844 | dishevelled associated activator of morphogenesis 2                 | Daam2         |  |
| 1430248_at   | 1.05331 | RIKEN cDNA 4930415O11 gene                                          | 4930415O11Rik |  |
| 1430249_at   | 0.99580 | RIKEN cDNA 4930473A02 gene                                          | 4930473A02Rik |  |
| 1430250_at   | 1.00687 | "SEC24 related gene family, member C ( <i>S. cerevisiae</i> )"      | Sec24c        |  |
| 1430251_at   | 1.19258 | RIKEN cDNA D330022H12 gene                                          | D330022H12Rik |  |
| 1430252_at   | 0.87671 | RIKEN cDNA 3110027N22 gene                                          | 3110027N22Rik |  |
| 1430253_at   | 1.05495 | RIKEN cDNA 2900006B11 gene                                          | 2900006B11Rik |  |
| 1430254_at   | 1.01006 | RIKEN cDNA 4921517D22 gene                                          | 4921517D22Rik |  |
| 1430255_at   | 1.00516 | Kruppel-like factor 5                                               | Klf5          |  |
| 1430256_at   | 1.01328 | RIKEN cDNA 2310033K02 gene                                          | 2310033K02Rik |  |
| 1430257_at   | 0.83823 | "caspase recruitment domain family, member 11"                      | Card11        |  |
| 1430258_at   | 1.14701 | RIKEN cDNA 2810422J05 gene                                          | 2810422J05Rik |  |
| 1430259_at   | 0.94811 | "tumor necrosis factor receptor superfamily, member 11a"            | Tnfrsf11a     |  |
| 1430260_at   | 1.03376 | ---                                                                 | ---           |  |
| 1430261_at   | 0.93449 | ---                                                                 | ---           |  |
| 1430262_at   | 0.92961 | RIKEN cDNA 5330411J11 gene                                          | 5330411J11Rik |  |
| 1430263_at   | 1.07069 | RIKEN cDNA 1700109F18 gene                                          | 1700109F18Rik |  |
| 1430264_at   | 1.12957 | RIKEN cDNA 2610030P05 gene                                          | 2610030P05Rik |  |
| 1430265_at   | 1.11156 | amyloid beta precursor protein (cytoplasmic tail) binding protein 2 | Appbp2        |  |
| 1430266_at   | 0.91297 | RIKEN cDNA 1700003D09 gene                                          | 1700003D09Rik |  |
| 1430267_at   | 0.81887 | RIKEN cDNA 4833422M21 gene                                          | 4833422M21Rik |  |
| 1430268_at   | 1.06948 | RIKEN cDNA 9630005C17 gene                                          | 9630005C17Rik |  |
| 1430269_at   | 1.02427 | myosin binding protein H-like                                       | Mybphl        |  |
| 1430270_at   | 1.09073 | RIKEN cDNA 4933411K05 gene                                          | 4933411K05Rik |  |
| 1430271_x_at | 1.03205 | Josephin domain containing 3                                        | Josd3         |  |
| 1430272_at   | 1.24682 | GTP binding protein 5                                               | Gtpbp5        |  |
| 1430273_at   | 1.04974 | RIKEN cDNA 2410087M07 gene                                          | 2410087M07Rik |  |
| 1430274_a_at | 0.94125 | STARD3 N-terminal like                                              | Stard3nl      |  |
| 1430275_a_at | 1.08861 | aquarius                                                            | Aqr           |  |
| 1430276_at   | 1.08835 | RIKEN cDNA 1700003I16 gene                                          | 1700003I16Rik |  |
| 1430277_at   | 1.30837 | RIKEN cDNA 9430034F23 gene                                          | 9430034F23Rik |  |
| 1430278_a_at | 1.04783 | DEAQ RNA-dependent ATPase                                           | Dqx1          |  |
| 1430279_at   | 1.02721 | RIKEN cDNA 3110038A09 gene                                          | 3110038A09Rik |  |

|              |         |                                                                                                                                                                         |                                                  |
|--------------|---------|-------------------------------------------------------------------------------------------------------------------------------------------------------------------------|--------------------------------------------------|
| 1430280_at   | 1.14422 | RIKEN cDNA 1810062G17 gene                                                                                                                                              | 1810062G17Rik                                    |
| 1430281_at   | 0.96493 | GLI pathogenesis-related 1 like 1                                                                                                                                       | Glipr111                                         |
| 1430282_at   | 0.86722 | RIKEN cDNA 5730437N04 gene                                                                                                                                              | 5730437N04Rik                                    |
| 1430283_s_at | 1.13450 | RIKEN cDNA 4930418G15 gene                                                                                                                                              | 4930418G15Rik                                    |
| 1430284_at   | 0.96218 | RIKEN cDNA 1700008P02 gene                                                                                                                                              | 1700008P02Rik                                    |
| 1430285_at   | 1.00509 | "protein phosphatase 1, regulatory (inhibitor) subunit 14c"                                                                                                             | Ppp1r14c                                         |
| 1430286_s_at | 0.97923 | "protein phosphatase 1, regulatory (inhibitor) subunit 14c"                                                                                                             | Ppp1r14c                                         |
| 1430287_s_at | 0.99655 | HemK methyltransferase family member 1                                                                                                                                  | Hemk1                                            |
| 1430288_x_at | 0.96503 | ribosomal protein S21                                                                                                                                                   | Rps21                                            |
| 1430289_a_at | 1.11541 | WD repeat domain 77                                                                                                                                                     | Wdr77                                            |
| 1430290_at   | 1.18094 | ribosomal protein S15a /// similar to ribosomal protein S15a /// similar to ribosomal protein S15a /// similar to ribosomal protein S15a                                | Rps15a /// LOC434460 /// LOC664903 /// LOC675729 |
| 1430291_at   | 0.99833 | RIKEN cDNA 1110060D06 gene /// dedicator of cytokinesis 5                                                                                                               | 1110060D06Rik /// Dock5                          |
| 1430292_a_at | 0.94166 | RIKEN cDNA 1810030N24 gene                                                                                                                                              | 1810030N24Rik                                    |
| 1430293_a_at | 1.07245 | RIKEN cDNA B230118G17 gene                                                                                                                                              | B230118G17Rik                                    |
| 1430294_at   | 1.10270 | single-stranded DNA binding protein 1                                                                                                                                   | Ssbp1                                            |
| 1430295_at   | 1.02902 | "guanine nucleotide binding protein, alpha 13"                                                                                                                          | Gna13                                            |
| 1430296_at   | 0.86819 | RIKEN cDNA 4733401H21 gene                                                                                                                                              | 4733401H21Rik                                    |
| 1430297_a_at | 1.05440 | RIKEN cDNA 2010301N04 gene                                                                                                                                              | 2010301N04Rik                                    |
| 1430298_at   | 1.09603 | RIKEN cDNA 4930473A06 gene                                                                                                                                              | 4930473A06Rik                                    |
| 1430299_at   | 0.99733 | TSC22 domain family 4                                                                                                                                                   | Tsc22d4                                          |
| 1430300_at   | 0.93953 | SCO cytochrome oxidase deficient homolog 1 (yeast)                                                                                                                      | Sco1                                             |
| 1430301_at   | 0.95880 | syntaxin binding protein 5 (tomosyn)                                                                                                                                    | Stxbp5                                           |
| 1430302_at   | 0.90704 | RIKEN cDNA 1500041B16 gene                                                                                                                                              | 1500041B16Rik                                    |
| 1430303_at   | 1.17186 | RIKEN cDNA 4921537D05 gene                                                                                                                                              | 4921537D05Rik                                    |
| 1430304_at   | 0.99870 | WD repeat domain 76                                                                                                                                                     | Wdr76                                            |
| 1430305_at   | 1.07195 | RIKEN cDNA 2500004C02 gene                                                                                                                                              | 2500004C02Rik                                    |
| 1430306_a_at | 0.99284 | "ATPase, H+ transporting, lysosomal V1 subunit C2"                                                                                                                      | Atp6v1c2                                         |
| 1430307_a_at | 1.11376 | "malic enzyme, supernatant /// similar to NADP-dependent malic enzyme (NADP-ME) (Malic enzyme 1) /// similar to NADP-dependent malic enzyme (NADP-ME) (Malic enzyme 1)" | Mod1 /// LOC624892 /// LOC677317                 |
| 1430308_at   | 1.08907 | RIKEN cDNA 5730409N16 gene                                                                                                                                              | 5730409N16Rik                                    |
| 1430309_at   | 1.11092 | Nipped-B homolog (Drosophila)                                                                                                                                           | Nipbl                                            |
| 1430310_at   | 0.88679 | tetraspanin 11                                                                                                                                                          | Tspan11                                          |
| 1430311_at   | 1.25525 | Myristoylated alanine rich protein kinase C substrate                                                                                                                   | Marcks                                           |
| 1430312_at   | 0.96966 | tryptophan rich basic protein                                                                                                                                           | Wrb                                              |
| 1430313_at   | 0.94100 | ADAMTS-like 1                                                                                                                                                           | Adamts11                                         |
| 1430314_at   | 0.86478 | RIKEN cDNA 4933437F05 gene                                                                                                                                              | 4933437F05Rik                                    |
| 1430315_at   | 0.91723 | RIKEN cDNA 1700010N08 gene                                                                                                                                              | 1700010N08Rik                                    |
| 1430316_at   | 0.96581 | RIKEN cDNA 4930579E17 gene                                                                                                                                              | 4930579E17Rik                                    |
| 1430317_at   | 1.29946 | "ubiquitin-conjugating enzyme E2, J2 homolog (yeast)"                                                                                                                   | Ube2j2                                           |

1430318\_at 0.94959 spermidine/spermine N1-acetyl transferase 2 Sat2  
1430319\_at 1.07594 RIKEN cDNA 4833411C07 gene 4833411C07Rik  
1430320\_at 0.90104 "dystrophin, muscular dystrophy" Dmd  
1430321\_at 0.92045 RIKEN cDNA A930040G15 gene A930040G15Rik  
1430322\_at 0.96206 ADP-ribosylation factor-like 13B Arl13b  
1430323\_at 0.97171 RIKEN cDNA 1700049E17 gene /// hypothetical protein LOC624112 /// similar  
to Spetex-2C protein /// similar to Spetex-2C protein 1700049E17Rik /// LOC624112 ///  
LOC638262 /// LOC666214  
1430324\_x\_at 1.02725 RIKEN cDNA 1700049E17 gene /// similar to Spetex-2C protein  
1700049E17Rik /// LOC666214  
1430325\_at 0.96472 --- ---  
1430326\_s\_at 1.02884 "ubiquinol-cytochrome c reductase, complex III subunit VII" Uqcrcq  
1430327\_at 0.98028 secretory carrier membrane protein 4 Scamp4  
1430328\_at 1.33472 polymerase (RNA) III (DNA directed) polypeptide F Polr3f  
1430329\_at 1.20710 cingulin Cgn  
1430330\_at 1.02911 widely-interspaced zinc finger motifs Wiz  
1430331\_at 0.94396 RIKEN cDNA 1110005A03 gene 1110005A03Rik  
1430332\_a\_at 0.84813 "glucuronidase, beta" Gusb  
1430333\_at 1.05398 elongation factor Tu GTP binding domain containing 1 Eftud1  
1430334\_at 0.91232 zinc finger protein 192 Zfp192  
1430335\_a\_at 1.02119 paired box gene 3 Pax3  
1430336\_at 0.97430 guanylate cyclase 2g Gucy2g  
1430337\_at 0.91148 RIKEN cDNA 6530401N04 gene 6530401N04Rik  
1430338\_at 0.98074 RIKEN cDNA 4122401K19 gene 4122401K19Rik  
1430339\_at 0.90760 RIKEN cDNA 2610021K21 gene 2610021K21Rik  
1430340\_at 0.84936 RIKEN cDNA 4930431B11 gene 4930431B11Rik  
1430341\_at 1.30082 nudix (nucleoside diphosphate linked moiety X)-type motif 5 Nudt5  
1430342\_at 0.93604 RIKEN cDNA 4930518J20 gene 4930518J20Rik  
1430343\_at 0.90286 nucleoporin 205 Nup205  
1430344\_at 1.05412 RIKEN cDNA 2900064P18 gene 2900064P18Rik  
1430345\_at 1.07977 RIKEN cDNA 5530402H23 gene 5530402H23Rik  
1430346\_at 0.93741 RIKEN cDNA 5730507A09 gene 5730507A09Rik  
1430347\_at 1.00136 RIKEN cDNA 4930524J08 gene 4930524J08Rik  
1430348\_at 1.13217 RIKEN cDNA 2900019E01 gene 2900019E01Rik  
1430349\_at 0.88627 "zinc finger, DHHC domain containing 11" Zdhhc11  
1430350\_at 0.99772 RIKEN cDNA 2610035F20 gene 2610035F20Rik  
1430351\_at 1.04325 spermatogenesis associated 18 Spata18  
1430352\_at 1.76198 RIKEN cDNA 8430417A20 gene 8430417A20Rik  
1430353\_at 0.83702 GLIS family zinc finger 3 Glis3  
1430354\_x\_at 0.88423 SCY1-like 1 (S. cerevisiae) Scyl1  
1430355\_a\_at 0.98816 STEAP family member 3 Steap3  
1430356\_at 1.12324 RIKEN cDNA 2210402A03 gene 2210402A03Rik  
1430357\_at 2.71064 "H3 histone, family 3B" H3f3b

1430358\_at 1.06853 "beclin 1 (coiled-coil, myosin-like BCL2-interacting protein)" Becn1  
1430359\_a\_at 0.94870 NAD synthetase 1 Nadsyn1  
1430360\_at 1.18186 RIKEN cDNA 4833412C15 gene 4833412C15Rik  
1430361\_at 0.89605 RIKEN cDNA 2610005M20 gene 2610005M20Rik  
1430362\_at 0.98697 RIKEN cDNA 5730409N24 gene 5730409N24Rik  
1430363\_at 0.81366 RIKEN cDNA 4933407O12 gene 4933407O12Rik  
1430364\_at 1.08431 activating transcription factor 7 interacting protein 2 Atf7ip2  
1430365\_at 1.02893 "nuclear transcription factor, X-box binding-like 1" Nfxl1  
1430366\_at 0.95977 RIKEN cDNA 5430405H02 gene 5430405H02Rik  
1430367\_at 1.25235 Stam binding protein like 1 Stambpl1  
1430368\_s\_at 0.99859 RIKEN cDNA 1700019D03 gene 1700019D03Rik  
1430369\_at 1.13710 erythrocyte protein band 4.1 Epb4.1  
1430370\_at 1.13508 glutamyl-prolyl-tRNA synthetase Eprs  
1430371\_x\_at 1.06205 eukaryotic translation initiation factor 2 alpha kinase 3 Eif2ak3  
1430372\_at 0.86534 RIKEN cDNA D730045B01 gene D730045B01Rik  
1430373\_at 0.98216 RIKEN cDNA 5430427O19 gene 5430427O19Rik  
1430374\_at 1.00266 "solute carrier family 25, member 37" Slc25a37  
1430375\_a\_at 0.98247 chemokine (C-C motif) ligand 27 Ccl27  
1430376\_at 0.98089 leucine rich repeat containing 9 Lrrc9  
1430377\_at 1.02933 RIKEN cDNA 1300015D01 gene 1300015D01Rik  
1430378\_at 0.85780 RIKEN cDNA 2900011G08 gene 2900011G08Rik  
1430379\_at 1.16904 RIKEN cDNA 5830411K21 gene 5830411K21Rik  
1430380\_at 1.13458 HemK methyltransferase family member 2 Hemk2  
1430381\_at 0.98865 Ftsj homolog 1 (E. coli) Ftsj1  
1430382\_at 0.87761 RIKEN cDNA 4833413G10 gene 4833413G10Rik  
1430383\_at 1.03856 CEA-related cell adhesion molecule 20 Ceacam20  
1430384\_at 1.47389 "transducin-like enhancer of split 4, homolog of Drosophila E(spl)" Tle4  
1430385\_a\_at 0.91133 "galactosidase, beta 1-like" Glb1l  
1430386\_at 1.91338 RIKEN cDNA E030024N20 gene E030024N20Rik  
1430387\_at 1.03050 RIKEN cDNA 1810073O08 gene 1810073O08Rik  
1430388\_a\_at 0.72866 sulfatase 2 Sulf2  
1430389\_at 0.94447 RIKEN cDNA 4930509H03 gene 4930509H03Rik  
1430390\_x\_at 0.92613 RIKEN cDNA 4930444G20 gene /// similar to sentrin 18 /// similar to Sumo1/  
sentrin/Smt3 specific protease 17 /// similar to Sumo1/sentrin/Smt3 specific protease 17  
4930444G20Rik /// LOC625660 /// LOC639644 /// LOC672736  
1430391\_a\_at 0.94767 "ST8 alpha-N-acetyl-neuraminide alpha-2,8-sialyltransferase 4" St8sia4  
1430392\_at 1.73779 RIKEN cDNA 9530086O07 gene 9530086O07Rik  
1430393\_at 1.72508 RIKEN cDNA 2510017J16 gene 2510017J16Rik  
1430394\_a\_at 0.96405 "ATP-binding cassette, sub-family B (MDR/TAP), member 9" Abcb9  
1430395\_at 0.95781 ankyrin repeat domain 45 Ankrd45  
1430396\_at 0.93526 RIKEN cDNA 5730403I07 gene 5730403I07Rik  
1430397\_at 1.11601 "glutamate oxaloacetate transaminase 2, mitochondrial /// similar to Aspartate  
aminotransferase, mitochondrial precursor (Transaminase A) (Glutamate oxaloacetate transaminase

## 2)" Got2 /// LOC640847

|              |         |                                                                                    |                                            |               |         |
|--------------|---------|------------------------------------------------------------------------------------|--------------------------------------------|---------------|---------|
| 1430398_at   | 0.95203 | RIKEN cDNA 4921517O11                                                              | gene                                       | 4921517O11Rik |         |
| 1430399_at   | 1.13566 | RIKEN cDNA 2810458H16                                                              | gene                                       | 2810458H16Rik |         |
| 1430400_at   | 1.09158 | RIKEN cDNA 4930521A18                                                              | gene                                       | 4930521A18Rik |         |
| 1430401_at   | 1.20621 | RIKEN cDNA 3110045C21                                                              | gene                                       | 3110045C21Rik |         |
| 1430402_at   | 0.92816 | "succinate-Coenzyme A ligase, ADP-forming, beta subunit"                           |                                            |               | Sucla2  |
| 1430403_at   | 1.31674 | ubiquitin specific peptidase 32                                                    | Usp32                                      |               |         |
| 1430404_at   | 2.01209 | RIKEN cDNA 4833416J08                                                              | gene                                       | 4833416J08Rik |         |
| 1430405_at   | 0.89832 | ---                                                                                | ---                                        |               |         |
| 1430406_at   | 0.91922 | RIKEN cDNA 4930467M19                                                              | gene                                       | 4930467M19Rik |         |
| 1430407_at   | 0.76105 | RIKEN cDNA 3110035C09                                                              | gene                                       | 3110035C09Rik |         |
| 1430408_at   | 0.93881 | "calcium channel, voltage-dependent, P/Q type, alpha 1A subunit"                   |                                            |               | Cacna1a |
| 1430409_at   | 0.98225 | N-ethylmaleimide sensitive fusion protein                                          | Nsf                                        |               |         |
| 1430410_at   | 0.89166 | RIKEN cDNA 1810019N24                                                              | gene                                       | 1810019N24Rik |         |
| 1430411_at   | 0.95732 | RIKEN cDNA 6330525I24                                                              | gene                                       | 6330525I24Rik |         |
| 1430412_at   | 1.28442 | RIKEN cDNA 2310068C19                                                              | gene                                       | 2310068C19Rik |         |
| 1430413_at   | 1.04221 | transmembrane protein 29                                                           | Tmem29                                     |               |         |
| 1430414_at   | 1.10576 | RIKEN cDNA 5730406G12                                                              | gene                                       | 5730406G12Rik |         |
| 1430415_at   | 1.69190 | PHD finger protein 6                                                               | Phf6                                       |               |         |
| 1430416_at   | 1.01478 | RIKEN cDNA 4931431B13                                                              | gene                                       | 4931431B13Rik |         |
| 1430417_s_at | 0.99620 | RIKEN cDNA 0610025P10                                                              | gene                                       | 0610025P10Rik |         |
| 1430418_at   | 1.49489 | transmembrane protein 57                                                           | Tmem57                                     |               |         |
| 1430419_at   | 1.02191 | RIKEN cDNA 2310031A07                                                              | gene                                       | 2310031A07Rik |         |
| 1430420_at   | 0.97334 | "asparagine-linked glycosylation 9 homolog (yeast, alpha 1,2 mannosyltransferase)" | Alg9                                       |               |         |
| 1430421_a_at | 1.05825 | cDNA sequence BC010787                                                             | BC010787                                   |               |         |
| 1430422_at   | 1.30126 | RIKEN cDNA 1700020A23                                                              | gene                                       | 1700020A23Rik |         |
| 1430423_s_at | 1.01761 | RIKEN cDNA 2610528E23                                                              | gene /// FGF receptor activating protein 1 |               |         |
|              |         |                                                                                    | 2610528E23Rik /// Frag1                    |               |         |
| 1430424_at   | 1.01334 | RIKEN cDNA 4933433C11                                                              | gene                                       | 4933433C11Rik |         |
| 1430425_at   | 0.96482 | sidekick homolog 2 (chicken)                                                       | Sdk2                                       |               |         |
| 1430426_at   | 1.01156 | RIKEN cDNA 4930540M05                                                              | gene                                       | 4930540M05Rik |         |
| 1430427_a_at | 0.78777 | protocadherin 18                                                                   | Pcdh18                                     |               |         |
| 1430428_at   | 1.22512 | RIKEN cDNA 2310066F23                                                              | gene                                       | 2310066F23Rik |         |
| 1430429_at   | 0.95090 | phosphatidylglycerophosphate synthase 1                                            | Pgs1                                       |               |         |
| 1430430_at   | 1.08223 | RIKEN cDNA 6130401L20                                                              | gene                                       | 6130401L20Rik |         |
| 1430431_at   | 1.06458 | RIKEN cDNA 4933407H18                                                              | gene                                       | 4933407H18Rik |         |
| 1430432_at   | 0.83115 | tripartite motif-containing 42                                                     | Trim42                                     |               |         |
| 1430433_at   | 0.94095 | RIKEN cDNA 4933406J08                                                              | gene /// hypothetical protein LOC640572    |               |         |
|              |         |                                                                                    | 4933406J08Rik /// LOC640572                |               |         |
| 1430434_at   | 1.08333 | transketolase-like 2                                                               | Tktl2                                      |               |         |
| 1430435_at   | 0.84590 | "AF4/FMR2 family, member 3"                                                        | Aff3                                       |               |         |
| 1430436_at   | 0.94112 | RIKEN cDNA 3321401G04                                                              | gene                                       | 3321401G04Rik |         |

|              |         |                                                          |               |  |
|--------------|---------|----------------------------------------------------------|---------------|--|
| 1430437_a_at | 0.93342 | RIKEN cDNA 1300018I17 gene                               | 1300018I17Rik |  |
| 1430438_at   | 1.14522 | RIKEN cDNA 8430439J12 gene                               | 8430439J12Rik |  |
| 1430439_at   | 0.94648 | "multiple C2 domains, transmembrane 1"                   | Mctp1         |  |
| 1430440_at   | 0.92519 | RIKEN cDNA 4930442J19 gene                               | 4930442J19Rik |  |
| 1430441_at   | 1.05115 | RIKEN cDNA 4933438K21 gene                               | 4933438K21Rik |  |
| 1430442_at   | 1.01177 | nitric oxide synthase 1 (neuronal) adaptor protein       | Nos1ap        |  |
| 1430443_at   | 1.04670 | annexin A10                                              | Anxa10        |  |
| 1430444_at   | 0.83518 | RIKEN cDNA 0610006L08 gene                               | 0610006L08Rik |  |
| 1430445_at   | 0.96674 | A kinase (PRKA) anchor protein 13                        | Akap13        |  |
| 1430446_at   | 1.01822 | RIKEN cDNA 2310057B04 gene                               | 2310057B04Rik |  |
| 1430447_a_at | 0.96152 | leukocyte-associated Ig-like receptor 1                  | Lair1         |  |
| 1430448_at   | 1.01842 | RIKEN cDNA 6720418B01 gene                               | 6720418B01Rik |  |
| 1430449_at   | 0.99291 | RIKEN cDNA C330002I19 gene                               | C330002I19Rik |  |
| 1430450_at   | 1.01699 | RIKEN cDNA 2310004L02 gene                               | 2310004L02Rik |  |
| 1430451_at   | 1.00250 | RIKEN cDNA 4930481B07 gene                               | 4930481B07Rik |  |
| 1430452_at   | 1.03709 | "cytochrome P450, family 20, subfamily A, polypeptide 1" | Cyp20a1       |  |
| 1430453_a_at | 1.00813 | Bcl2-like 2                                              | Bcl2l2        |  |
| 1430454_x_at | 0.97510 | Bcl2-like 2                                              | Bcl2l2        |  |
| 1430455_at   | 0.99633 | olfactory receptor 701                                   | Olf701        |  |
| 1430456_at   | 0.91775 | RIKEN cDNA 5830406C21 gene                               | 5830406C21Rik |  |
| 1430457_at   | 0.93325 | decay accelerating factor 2                              | Daf2          |  |
| 1430458_at   | 0.97802 | suppressor of Ty 6 homolog (S. cerevisiae)               | Supt6h        |  |
| 1430459_at   | 0.99024 | RIKEN cDNA 4632428C04 gene                               | 4632428C04Rik |  |
| 1430460_at   | 1.22593 | RIKEN cDNA 5830410F13 gene                               | 5830410F13Rik |  |
| 1430461_at   | 0.94414 | RIKEN cDNA 1700120E14 gene                               | 1700120E14Rik |  |
| 1430462_at   | 0.99439 | RIKEN cDNA 2310002L09 gene                               | 2310002L09Rik |  |
| 1430463_a_at | 0.94648 | "synuclein, alpha interacting protein (synphilin)"       | Sncaip        |  |
| 1430464_at   | 0.98606 | RIKEN cDNA 9430021M05 gene                               | 9430021M05Rik |  |
| 1430465_at   | 1.16627 | ---                                                      | ---           |  |
| 1430466_at   | 0.94361 | RIKEN cDNA 2310005G13 gene                               | 2310005G13Rik |  |
| 1430467_at   | 1.03058 | RIKEN cDNA 4921511H03 gene                               | 4921511H03Rik |  |
| 1430468_at   | 0.99141 | RIKEN cDNA 2810449G22 gene                               | 2810449G22Rik |  |
| 1430469_at   | 0.84766 | tubulin tyrosine ligase like family 5                    | Tll5          |  |
| 1430470_at   | 0.93519 | RIKEN cDNA 5730411F24 gene                               | 5730411F24Rik |  |
| 1430471_at   | 1.03558 | RIKEN cDNA 9230110K08 gene                               | 9230110K08Rik |  |
| 1430472_at   | 1.04465 | armadillo repeat containing 1                            | Armcl         |  |
| 1430473_at   | 0.94796 | RIKEN cDNA 9530034A14 gene                               | 9530034A14Rik |  |
| 1430474_a_at | 1.00843 | mitochondrial carrier homolog 2 (C. elegans)             | Mtch2         |  |
| 1430475_at   | 0.93514 | ---                                                      | ---           |  |
| 1430476_at   | 1.05303 | signal recognition particle 54                           | Srp54         |  |
| 1430477_s_at | 0.90404 | ---                                                      | ---           |  |
| 1430478_at   | 0.96440 | RIKEN cDNA 3110043A19 gene                               | 3110043A19Rik |  |
| 1430479_at   | 0.97181 | RIKEN cDNA 2010007H06 gene                               | 2010007H06Rik |  |



|              |         |                                                                         |         |               |
|--------------|---------|-------------------------------------------------------------------------|---------|---------------|
| 1430480_at   | 0.83800 | negative regulator of ubiquitin-like proteins 1                         | Nub1    |               |
| 1430481_at   | 1.05682 | RIKEN cDNA 4930545L23                                                   | gene    | 4930545L23Rik |
| 1430482_at   | 0.94281 | ---                                                                     | ---     |               |
| 1430483_a_at | 0.99563 | transmembrane protein 79                                                | Tmem79  |               |
| 1430484_at   | 0.83830 | RIKEN cDNA 8430428J23                                                   | gene    | 8430428J23Rik |
| 1430485_at   | 2.09424 | RIKEN cDNA 3010009O07                                                   | gene    | 3010009O07Rik |
| 1430486_at   | 0.97501 | RAD51-like 1 ( <i>S. cerevisiae</i> )                                   | Rad5111 |               |
| 1430487_at   | 1.03094 | AU RNA binding protein/enoyl-coenzyme A hydratase                       |         | Auh           |
| 1430488_at   | 0.99461 | RIKEN cDNA 1700066B19                                                   | gene    | 1700066B19Rik |
| 1430489_at   | 0.94580 | RIKEN cDNA 5430416G10                                                   | gene    | 5430416G10Rik |
| 1430490_at   | 0.90493 | ---                                                                     | ---     |               |
| 1430491_at   | 1.46176 | block of proliferation 1                                                | Bop1    |               |
| 1430492_at   | 0.94863 | phosphorylase kinase alpha 2                                            | Phka2   |               |
| 1430493_at   | 0.95088 | RIKEN cDNA 2310061G22                                                   | gene    | 2310061G22Rik |
| 1430494_at   | 1.15615 | RIKEN cDNA 2010005J08                                                   | gene    | 2010005J08Rik |
| 1430495_at   | 0.95347 | inositol (myo)-1(or 4)-monophosphatase 1                                | Imp1    |               |
| 1430496_at   | 1.15461 | RIKEN cDNA 6720408I04                                                   | gene    | 6720408I04Rik |
| 1430497_at   | 1.10718 | retinoid X receptor alpha                                               | Rxra    |               |
| 1430498_at   | 1.17912 | RIKEN cDNA 9130009I01                                                   | gene    | 9130009I01Rik |
| 1430499_at   | 0.91813 | RIKEN cDNA 1700058M13                                                   | gene    | 1700058M13Rik |
| 1430500_s_at | 0.96716 | metaxin 2                                                               | Mtx2    |               |
| 1430501_at   | 0.98574 | RIKEN cDNA C030047K22                                                   | gene    | C030047K22Rik |
| 1430502_at   | 1.19340 | RIKEN cDNA 9130206N08                                                   | gene    | 9130206N08Rik |
| 1430503_at   | 1.05953 | RIKEN cDNA 6330522J23                                                   | gene    | 6330522J23Rik |
| 1430504_at   | 0.86047 | RIKEN cDNA 1700108E19                                                   | gene    | 1700108E19Rik |
| 1430505_at   | 1.07361 | RIKEN cDNA 1110032O16                                                   | gene    | 1110032O16Rik |
| 1430506_at   | 1.02824 | RIKEN cDNA 8430406P12                                                   | gene    | 8430406P12Rik |
| 1430507_at   | 0.95568 | RIKEN cDNA 1700027J07                                                   | gene    | 1700027J07Rik |
| 1430508_at   | 0.98718 | RIKEN cDNA 1700084F23                                                   | gene    | 1700084F23Rik |
| 1430509_at   | 0.79478 | ---                                                                     | ---     |               |
| 1430510_at   | 0.88237 | RIKEN cDNA B130050I23                                                   | gene    | B130050I23Rik |
| 1430511_at   | 0.95569 | RIKEN cDNA 1500037O19                                                   | gene    | 1500037O19Rik |
| 1430512_a_at | 0.95886 | immunoglobulin (CD79A) binding protein 1b                               | Igbp1b  |               |
| 1430513_at   | 0.92602 | RIKEN cDNA 1700055N04                                                   | gene    | 1700055N04Rik |
| 1430514_a_at | 0.93209 | CD99 antigen                                                            | Cd99    |               |
| 1430515_s_at | 1.00344 | aminoadipate-semialdehyde dehydrogenase-phosphopantetheinyl transferase |         |               |
| Aasdhppt     |         |                                                                         |         |               |
| 1430516_at   | 0.93722 | RIKEN cDNA 4930428B01                                                   | gene    | 4930428B01Rik |
| 1430517_at   | 1.00583 | RIKEN cDNA 4930544O15                                                   | gene    | 4930544O15Rik |
| 1430518_at   | 0.96383 | RIKEN cDNA 5430402E10                                                   | gene    | 5430402E10Rik |
| 1430519_a_at | 0.99065 | "CCR4-NOT transcription complex, subunit 7"                             | Cnot7   |               |
| 1430520_at   | 0.93506 | copine VIII                                                             | Cpne8   |               |
| 1430521_s_at | 0.92322 | copine VIII                                                             | Cpne8   |               |

1430522\_a\_at 1.09716 vesicle-associated membrane protein 5 Vamp5  
1430523\_s\_at 0.94866 "immunoglobulin lambda chain, variable 1" Igl-V1  
1430524\_at 0.86563 RIKEN cDNA 1700020N15 gene /// hypothetical LOC627927  
1700020N15Rik /// LOC627927  
1430525\_at 0.86614 RIKEN cDNA 2310001K24 gene 2310001K24Rik  
1430526\_a\_at 0.94536 "SWI/SNF related, matrix associated, actin dependent regulator of chromatin, subfamily a, member 2" Smarca2  
1430527\_a\_at 0.79827 ring finger protein 167 Rnf167  
1430528\_at 1.08528 syndecan binding protein Sdcbp  
1430529\_at 1.46459 "casein kinase 1, alpha 1" Csnk1a1  
1430530\_s\_at 0.94292 NmrA-like family domain containing 1 Nmral1  
1430531\_at 1.03806 "biphenyl hydrolase-like (serine hydrolase, breast epithelial mucin-associated antigen)" Bphl  
1430532\_at 0.97519 dymeclin Dym  
1430533\_a\_at 1.00822 "catenin (cadherin associated protein), beta 1" Ctnnb1  
1430534\_at 0.93453 "ribonuclease, RNase A family, 6" Rnase6  
1430535\_at 0.86933 TSC22 domain family 2 Tsc22d2  
1430536\_a\_at 1.16628 enhancer of rudimentary homolog (Drosophila) Erh  
1430537\_at 0.95887 tRNA methyltransferase 12 homolog (S. cerevisiae) Trmt12  
1430538\_at 0.86458 RIKEN cDNA 2210013O21 gene 2210013O21Rik  
1430539\_at 1.01582 RIKEN cDNA 1810057P16 gene 1810057P16Rik  
1430540\_at 0.92685 coiled-coil-helix-coiled-coil-helix domain containing 8 Chchd8  
1430541\_at 0.96815 : F-box protein 44 Fbxo44  
1430542\_a\_at 1.15428 "solute carrier family 25 (mitochondrial carrier, adenine nucleotide translocator), member 5 /// similar to ADP/ATP translocase 2 (Adenine nucleotide translocator 2) (ANT 2) (ADP,ATP carrier protein 2) (Solute carrier family 25 member 5) /// similar to solute carrier family 25, member 5" Slc25a5 /// LOC433923 /// LOC670371  
1430543\_at 1.05515 RIKEN cDNA 1500005P14 gene 1500005P14Rik  
1430544\_at 0.91124 RIKEN cDNA 5830404H04 gene 5830404H04Rik  
1430545\_at 1.10507 DBF4 homolog (S. cerevisiae) Dbf4  
1430546\_at 0.95998 "crystallin, zeta (quinone reductase)-like 1" Cryz11  
1430547\_s\_at 1.06343 "crystallin, zeta (quinone reductase)-like 1" Cryz11  
1430548\_at 1.02758 --- ---  
1430549\_at 1.04001 blocked early in transport 1 homolog (S. cerevisiae)-like Bet11  
1430550\_at 0.85805 "lipase-like, ab-hydrolase domain containing 3" Lip13  
1430551\_s\_at 1.05059 "lipase-like, ab-hydrolase domain containing 3" Lip13  
1430552\_a\_at 0.94862 SET binding factor 1 Sbf1  
1430553\_at 0.98834 V-set and immunoglobulin domain containing 1 Vsig1  
1430554\_at 0.96949 leucine-rich repeats and immunoglobulin-like domains 3 Lrig3  
1430555\_s\_at 0.82116 leucine-rich repeats and immunoglobulin-like domains 3 Lrig3  
1430556\_at 1.20474 sperm associated antigen 9 Spag9  
1430557\_at 0.91566 RIKEN cDNA 4930434J08 gene 4930434J08Rik  
1430558\_at 0.98247 zinc finger protein 318 Zfp318

|              |         |                                                                                                                                                                                                                       |               |
|--------------|---------|-----------------------------------------------------------------------------------------------------------------------------------------------------------------------------------------------------------------------|---------------|
| 1430559_at   | 1.01939 | "5'-nucleotidase, cytosolic III-like"                                                                                                                                                                                 | Nt5c3l        |
| 1430560_at   | 1.09510 | "protein phosphatase 1, regulatory subunit 10"                                                                                                                                                                        | Ppp1r10       |
| 1430561_at   | 0.84579 | "DnaJ (Hsp40) homolog, subfamily B, member 14"                                                                                                                                                                        | Dnajb14       |
| 1430562_at   | 1.00497 | zinc finger protein 95                                                                                                                                                                                                | Zfp95         |
| 1430563_at   | 0.98993 | minichromosome maintenance deficient domain containing 1                                                                                                                                                              | Mcmdc1        |
| 1430564_at   | 1.00938 | "MOB1, Mps One Binder kinase activator-like 1A (yeast)"                                                                                                                                                               | Mobk11a       |
| 1430565_at   | 0.84156 | RIKEN cDNA 1700030J22 gene                                                                                                                                                                                            | 1700030J22Rik |
| 1430566_at   | 1.44306 | RIKEN cDNA 4733401A01 gene                                                                                                                                                                                            | 4733401A01Rik |
| 1430567_at   | 1.04803 | "serine peptidase inhibitor, Kazal type 5"                                                                                                                                                                            | Spink5        |
| 1430568_at   | 0.99521 | zinc finger CCCH type containing 13                                                                                                                                                                                   | Zc3h13        |
| 1430569_at   | 0.99782 | tetratricopeptide repeat domain 9C                                                                                                                                                                                    | Ttc9c         |
| 1430570_at   | 0.91639 | kynureninase (L-kynurenine hydrolase)                                                                                                                                                                                 | Kynu          |
| 1430571_s_at | 1.01645 | armadillo repeat containing 6                                                                                                                                                                                         | Armc6         |
| 1430572_at   | 1.15121 | RIKEN cDNA 1810042K04 gene                                                                                                                                                                                            | 1810042K04Rik |
| 1430573_s_at | 0.90016 | ethanol decreased 2                                                                                                                                                                                                   | Etohd2        |
| 1430574_at   | 1.01736 | cyclin-dependent kinase inhibitor 3                                                                                                                                                                                   | Cdkn3         |
| 1430575_a_at | 1.41028 | tripeptidyl peptidase II                                                                                                                                                                                              | Tpp2          |
| 1430576_at   | 1.29776 | tripeptidyl peptidase II                                                                                                                                                                                              | Tpp2          |
| 1430577_at   | 0.77249 | centrosomal protein 27                                                                                                                                                                                                | Cep27         |
| 1430578_at   | 1.04658 | "eukaryotic translation initiation factor 4 gamma, 3"                                                                                                                                                                 | Eif4g3        |
| 1430579_at   | 0.63607 | TRAF2 and NCK interacting kinase /// similar to [Segment 1 of 2] Traf2 and NCK-interacting kinase /// region containing TRAF2 and NCK interacting kinase; RIKEN cDNA C630040K21 gene Tnik /// LOC665113 /// LOC674765 |               |
| 1430580_at   | 0.95158 | RIKEN cDNA 2810030E01 gene                                                                                                                                                                                            | 2810030E01Rik |
| 1430581_at   | 0.99161 | ---                                                                                                                                                                                                                   | ---           |
| 1430582_at   | 0.90202 | SNF2 histone linker PHD RING helicase                                                                                                                                                                                 | Shprh         |
| 1430583_at   | 0.92159 | RIKEN cDNA C130076O07 gene                                                                                                                                                                                            | C130076O07Rik |
| 1430584_s_at | 0.99614 | carbonic anhydrase 3                                                                                                                                                                                                  | Car3          |
| 1430585_at   | 1.95957 | RIKEN cDNA 5930436O19 gene                                                                                                                                                                                            | 5930436O19Rik |
| 1430586_at   | 1.05170 | RIKEN cDNA 2700007P21 gene                                                                                                                                                                                            | 2700007P21Rik |
| 1430587_at   | 1.02266 | RIKEN cDNA 4933425L03 gene                                                                                                                                                                                            | 4933425L03Rik |
| 1430588_at   | 0.89348 | Maestro                                                                                                                                                                                                               | Mro           |
| 1430589_at   | 0.98852 | "phosphatidylinositol glycan anchor biosynthesis, class H"                                                                                                                                                            | Pigh          |
| 1430590_at   | 0.93450 | "DNA segment, Chr 3, ERATO Doi 751, expressed"                                                                                                                                                                        | D3Ertd751e    |
| 1430591_at   | 0.97332 | dopa decarboxylase                                                                                                                                                                                                    | Ddc           |
| 1430592_at   | 1.13626 | transmembrane protein 106B                                                                                                                                                                                            | Tmem106b      |
| 1430593_at   | 0.99357 | RIKEN cDNA 1700041C02 gene                                                                                                                                                                                            | 1700041C02Rik |
| 1430594_at   | 0.97083 | RAB11 family interacting protein 1 (class I)                                                                                                                                                                          | Rab11fip1     |
| 1430595_at   | 0.91711 | growth arrest-specific 2 like 1                                                                                                                                                                                       | Gas2l1        |
| 1430596_s_at | 0.88205 | RIKEN cDNA 1700110N18 gene                                                                                                                                                                                            | 1700110N18Rik |
| 1430597_at   | 0.99859 | janus kinase and microtubule interacting protein 1                                                                                                                                                                    | Jakmip1       |
| 1430598_at   | 1.01119 | cAMP responsive element modulator                                                                                                                                                                                     | Crem          |
| 1430599_at   | 1.07750 | myelin transcription factor 1-like                                                                                                                                                                                    | Myt1l         |

|              |                                                                                                                                                                                                                                                                                                                                                                                                                                                                                                                                                                                                                                                                                                                       |                   |
|--------------|-----------------------------------------------------------------------------------------------------------------------------------------------------------------------------------------------------------------------------------------------------------------------------------------------------------------------------------------------------------------------------------------------------------------------------------------------------------------------------------------------------------------------------------------------------------------------------------------------------------------------------------------------------------------------------------------------------------------------|-------------------|
| 1430600_at   | 0.79921 CKLF-like MARVEL transmembrane domain containing 5                                                                                                                                                                                                                                                                                                                                                                                                                                                                                                                                                                                                                                                            | Cmtm5             |
| 1430601_at   | 0.92395 TBCC domain containing 1                                                                                                                                                                                                                                                                                                                                                                                                                                                                                                                                                                                                                                                                                      | Tbccd1            |
| 1430602_at   | 0.98915 RIKEN cDNA 4930520K10 gene                                                                                                                                                                                                                                                                                                                                                                                                                                                                                                                                                                                                                                                                                    | 4930520K10Rik     |
| 1430603_at   | 0.96014 RIKEN cDNA 4930579K19 gene                                                                                                                                                                                                                                                                                                                                                                                                                                                                                                                                                                                                                                                                                    | 4930579K19Rik     |
| 1430604_a_at | 0.92270 disabled homolog 2 (Drosophila)                                                                                                                                                                                                                                                                                                                                                                                                                                                                                                                                                                                                                                                                               | Dab2              |
| 1430605_at   | 1.02985 coiled-coil domain containing 101                                                                                                                                                                                                                                                                                                                                                                                                                                                                                                                                                                                                                                                                             | Ccdc101           |
| 1430606_at   | 1.00743 RIKEN cDNA 2310020F24 gene                                                                                                                                                                                                                                                                                                                                                                                                                                                                                                                                                                                                                                                                                    | 2310020F24Rik     |
| 1430607_at   | 0.99206 RIKEN cDNA 4930505D03 gene                                                                                                                                                                                                                                                                                                                                                                                                                                                                                                                                                                                                                                                                                    | 4930505D03Rik     |
| 1430608_at   | 1.10661 RIKEN cDNA 4930535I16 gene                                                                                                                                                                                                                                                                                                                                                                                                                                                                                                                                                                                                                                                                                    | 4930535I16Rik     |
| 1430609_at   | 1.10040 MORN repeat containing 1                                                                                                                                                                                                                                                                                                                                                                                                                                                                                                                                                                                                                                                                                      | Morn1             |
| 1430610_at   | 1.05580 mitochondrial ribosomal protein L38                                                                                                                                                                                                                                                                                                                                                                                                                                                                                                                                                                                                                                                                           | Mrpl38            |
| 1430611_at   | 0.97815 "zinc finger, DHHC domain containing 25"                                                                                                                                                                                                                                                                                                                                                                                                                                                                                                                                                                                                                                                                      | Zdhhc25           |
| 1430612_at   | 1.06423 RIKEN cDNA 1810033B17 gene                                                                                                                                                                                                                                                                                                                                                                                                                                                                                                                                                                                                                                                                                    | 1810033B17Rik     |
| 1430613_at   | 1.03652 RIKEN cDNA 1520402A15 gene                                                                                                                                                                                                                                                                                                                                                                                                                                                                                                                                                                                                                                                                                    | 1520402A15Rik     |
| 1430614_at   | 0.90415 RIKEN cDNA 4632415K11 gene                                                                                                                                                                                                                                                                                                                                                                                                                                                                                                                                                                                                                                                                                    | 4632415K11Rik     |
| 1430615_at   | 1.05662 RIKEN cDNA 4921517B04 gene                                                                                                                                                                                                                                                                                                                                                                                                                                                                                                                                                                                                                                                                                    | 4921517B04Rik     |
| 1430616_at   | 0.88147 RIKEN cDNA 4930528A17 gene                                                                                                                                                                                                                                                                                                                                                                                                                                                                                                                                                                                                                                                                                    | 4930528A17Rik     |
| 1430617_at   | 0.96827 Opa interacting protein 5                                                                                                                                                                                                                                                                                                                                                                                                                                                                                                                                                                                                                                                                                     | Oip5              |
| 1430618_at   | 1.20517 RIKEN cDNA 2610020C07 gene                                                                                                                                                                                                                                                                                                                                                                                                                                                                                                                                                                                                                                                                                    | 2610020C07Rik     |
| 1430619_a_at | 1.10810 mevalonate kinase /// similar to mevalonate kinase                                                                                                                                                                                                                                                                                                                                                                                                                                                                                                                                                                                                                                                            | Mvk /// LOC637711 |
| 1430620_at   | 0.94786 RIKEN cDNA 4930588N13 gene                                                                                                                                                                                                                                                                                                                                                                                                                                                                                                                                                                                                                                                                                    | 4930588N13Rik     |
| 1430621_at   | 1.01313 multimerin 1                                                                                                                                                                                                                                                                                                                                                                                                                                                                                                                                                                                                                                                                                                  | Mmrn1             |
| 1430622_at   | 1.84174 RIKEN cDNA 4833423F13 gene                                                                                                                                                                                                                                                                                                                                                                                                                                                                                                                                                                                                                                                                                    | 4833423F13Rik     |
| 1430623_s_at | 1.18202 RIKEN cDNA 5830411E10 gene                                                                                                                                                                                                                                                                                                                                                                                                                                                                                                                                                                                                                                                                                    | 5830411E10Rik     |
| 1430624_at   | 0.93695 RIKEN cDNA 4921511M17 gene /// hypothetical LOC434874 /// hypothetical LOC434879 /// hypothetical LOC546397 /// hypothetical LOC625650 /// hypothetical LOC625679 /// hypothetical LOC625713 /// hypothetical protein LOC635502 /// hypothetical protein LOC635523 /// hypothetical protein LOC635580 /// hypothetical protein LOC635709 /// similar to RIKEN cDNA 4921511M17 gene /// hypothetical protein LOC667285 /// hypothetical protein LOC670713 /// hypothetical protein LOC673177 4921511M17Rik /// LOC434874 /// LOC434879 /// LOC546397 /// LOC625650 /// LOC625679 /// LOC625713 /// LOC635502 /// LOC635523 /// LOC635580 /// LOC635709 /// LOC667256 /// LOC667285 /// LOC670713 /// LOC673177 |                   |
| 1430625_at   | 0.98796 keratin associated protein 3-2                                                                                                                                                                                                                                                                                                                                                                                                                                                                                                                                                                                                                                                                                | Krtap3-2          |
| 1430626_at   | 1.11748 zinc finger protein 398                                                                                                                                                                                                                                                                                                                                                                                                                                                                                                                                                                                                                                                                                       | Zfp398            |
| 1430627_at   | 1.06288 RIKEN cDNA 5330420P17 gene                                                                                                                                                                                                                                                                                                                                                                                                                                                                                                                                                                                                                                                                                    | 5330420P17Rik     |
| 1430628_at   | 0.96881 jumonji domain containing 2C                                                                                                                                                                                                                                                                                                                                                                                                                                                                                                                                                                                                                                                                                  | Jmjd2c            |
| 1430629_at   | 1.05254 "solute carrier family 16 (monocarboxylic acid transporters), member 14"                                                                                                                                                                                                                                                                                                                                                                                                                                                                                                                                                                                                                                      | Slc16a14          |
| 1430630_at   | 1.14236 --- ---                                                                                                                                                                                                                                                                                                                                                                                                                                                                                                                                                                                                                                                                                                       |                   |
| 1430631_at   | 1.05798 protein phosphatase 1F (PP2C domain containing)                                                                                                                                                                                                                                                                                                                                                                                                                                                                                                                                                                                                                                                               | Ppm1f             |
| 1430632_at   | 1.01986 ankyrin repeat and SOCS box-containing protein 1                                                                                                                                                                                                                                                                                                                                                                                                                                                                                                                                                                                                                                                              | Asb1              |
| 1430633_s_at | 1.38239 RIKEN cDNA C430045I18 gene                                                                                                                                                                                                                                                                                                                                                                                                                                                                                                                                                                                                                                                                                    | C430045I18Rik     |
| 1430634_a_at | 0.94389 "phosphofructokinase, platelet"                                                                                                                                                                                                                                                                                                                                                                                                                                                                                                                                                                                                                                                                               | Pfkp              |

|              |                                                                    |               |
|--------------|--------------------------------------------------------------------|---------------|
| 1430635_at   | 1.37470 melan-A Mlana                                              |               |
| 1430636_at   | 1.22879 RIKEN cDNA C030010B13 gene                                 | C030010B13Rik |
| 1430637_at   | 1.01449 RIKEN cDNA 2210016H18 gene                                 | 2210016H18Rik |
| 1430638_at   | 1.01077 RIKEN cDNA 1700041C02 gene                                 | 1700041C02Rik |
| 1430639_at   | 1.04134 RIKEN cDNA 4930524L23 gene                                 | 4930524L23Rik |
| 1430640_a_at | 0.93414 "protein kinase, cAMP dependent regulatory, type II beta"  | Prkar2b       |
| 1430641_at   | 0.89046 RIKEN cDNA 9030605I04 gene /// expressed sequence AI987692 |               |
|              | 9030605I04Rik /// AI987692                                         |               |
| 1430642_at   | 0.96998 RIKEN cDNA 2900001G08 gene                                 | 2900001G08Rik |
| 1430643_at   | 0.91361 mutS homolog 3 (E. coli)                                   | Msh3          |
| 1430644_at   | 0.87216 Williams Beuren syndrome chromosome region 25 (human)      | Wbscr25       |
| 1430645_at   | 0.96797 CD200 receptor 3                                           | Cd200r3       |
| 1430646_at   | 1.19247 RIKEN cDNA 5830407P18 gene                                 | 5830407P18Rik |
| 1430647_at   | 1.09601 cytoskeleton associated protein 5                          | Ckap5         |
| 1430648_at   | 1.18251 "sodium channel, voltage-gated, type II, beta"             | Scn2b         |
| 1430649_at   | 0.98930 "brain and acute leukemia, cytoplasmic"                    | Baalc         |
| 1430650_at   | 0.94458 zinc finger protein 191                                    | Zfp191        |
| 1430651_s_at | 0.92715 zinc finger protein 191                                    | Zfp191        |
| 1430652_at   | 0.99873 RIKEN cDNA 9030612E09 gene                                 | 9030612E09Rik |
| 1430653_at   | 1.43322 RIKEN cDNA A930026B05 gene                                 | A930026B05Rik |
| 1430654_at   | 1.12381 NOL1/NOP2/Sun domain family 3                              | Nsun3         |
| 1430655_at   | 0.86330 RIKEN cDNA 4631405K08 gene                                 | 4631405K08Rik |
| 1430656_a_at | 1.00357 asparagine synthetase domain containing 1                  | Asnsd1        |
| 1430657_at   | 1.05365 RIKEN cDNA 1810034E14 gene                                 | 1810034E14Rik |
| 1430658_a_at | 1.07278 gasdermin 2                                                | Gsdm2         |
| 1430659_at   | 0.95617 RIKEN cDNA 4930548H24 gene                                 | 4930548H24Rik |
| 1430660_at   | 0.99838 RIKEN cDNA 5830417I10 gene                                 | 5830417I10Rik |
| 1430661_at   | 1.11015 "myosin, light polypeptide 6B"                             | Myl6b         |
| 1430662_at   | 0.90167 RIKEN cDNA 9430091E24 gene                                 | 9430091E24Rik |
| 1430663_at   | 1.32433 RIKEN cDNA 9430037O13 gene                                 | 9430037O13Rik |
| 1430664_at   | 0.95815 zinc finger protein 169                                    | Zfp169        |
| 1430665_at   | 1.10764 RIKEN cDNA 5730480H06 gene                                 | 5730480H06Rik |
| 1430666_at   | 0.93069 similar to phospholipase B                                 | LOC665270     |
| 1430667_at   | 0.94896 protocadherin 10                                           | Pcdh10        |
| 1430668_a_at | 0.82295 "ankyrin repeat, family A (RFXANK-like), 2"                | Ankra2        |
| 1430669_at   | 1.01920 keratin associated protein 4-7                             | Krtap4-7      |
| 1430670_at   | 1.03417 coiled-coil domain containing 91                           | Ccdc91        |
| 1430671_a_at | 0.89987 RIKEN cDNA 0610010K06 gene                                 | 0610010K06Rik |
| 1430672_at   | 1.84795 RIKEN cDNA 5033418A18 gene                                 | 5033418A18Rik |
| 1430673_a_at | 0.97466 RIKEN cDNA 2210009G21 gene                                 | 2210009G21Rik |
| 1430674_at   | 1.01270 RIKEN cDNA 1700016C15 gene                                 | 1700016C15Rik |
| 1430675_at   | 0.96433 RIKEN cDNA 2900055J20 gene                                 | 2900055J20Rik |
| 1430676_at   | 0.93296 "procollagen, type XIX, alpha 1"                           | Col19a1       |

1430677\_at 0.96162 RIKEN cDNA 4930442L01 gene 4930442L01Rik  
1430678\_at 0.99118 RIKEN cDNA 5730457N03 gene 5730457N03Rik  
1430679\_at 1.02687 RIKEN cDNA 4933404O12 gene 4933404O12Rik  
1430680\_a\_at 1.11573 RIKEN cDNA 5830417I10 gene /// similar to Dingo protein isoform 2 ///  
similar to Dingo protein isoform 2 5830417I10Rik /// LOC673610 /// LOC677582  
1430681\_at 0.93944 "crystallin, lamda 1" Cryl1  
1430682\_at 0.80420 RIKEN cDNA 4930555I21 gene 4930555I21Rik  
1430683\_at 0.95851 dedicator of cytokinesis 6 /// similar to Dedicator of cytokinesis protein 6  
Dock6 /// LOC670024  
1430684\_s\_at 0.77527 Lrp2 binding protein Lrp2bp  
1430685\_at 0.92199 RIKEN cDNA 6330503C03 gene 6330503C03Rik  
1430686\_at 0.89386 RIKEN cDNA 4833418N02 gene 4833418N02Rik  
1430687\_at 1.00122 RIKEN cDNA 6330545A04 gene 6330545A04Rik  
1430688\_s\_at 0.77672 RIKEN cDNA D730039F16 gene D730039F16Rik  
1430689\_at 0.95636 RIKEN cDNA 2810019C22 gene 2810019C22Rik  
1430690\_at 1.21553 RIKEN cDNA 5430411C19 gene 5430411C19Rik  
1430691\_at 0.88102 RIKEN cDNA 4632411P08 gene 4632411P08Rik  
1430692\_a\_at 0.95895 Sell1 (suppressor of lin-12) 1 homolog (C. elegans) Sellh  
1430693\_at 0.99892 patatin-like phospholipase domain containing 5 Pnpla5  
1430694\_at 0.91626 --- ---  
1430695\_at 0.91892 toll-like receptor 4 Tlr4  
1430696\_at 1.05752 eukaryotic translation initiation factor 2 alpha kinase 1 Eif2ak1  
1430697\_at 1.16859 "Alport syndrome, mental retardation, midface hypoplasia and elliptocytosis  
chromosomal region gene 1 homolog (human)" Ammecr1  
1430698\_a\_at 0.92485 "DNA segment, Chr 14, ERATO Doi 581, expressed" D14Ert581e  
1430699\_at 1.18646 G protein-coupled receptor 165 Gpr165  
1430700\_a\_at 0.99148 "phospholipase A2, group VII (platelet-activating factor acetylhydrolase,  
plasma)" Pla2g7  
1430701\_a\_at 1.03205 RIKEN cDNA 5730528L13 gene 5730528L13Rik  
1430702\_at 2.14875 RIKEN cDNA 5830427D03 gene 5830427D03Rik  
1430703\_at 0.96109 --- ---  
1430704\_at 0.90816 interleukin-1 receptor-associated kinase 3 Irak3  
1430705\_at 1.47765 RIKEN cDNA 2410104I19 gene 2410104I19Rik  
1430706\_at 1.00520 RIKEN cDNA 1700081D17 gene 1700081D17Rik  
1430707\_s\_at 0.98754 RIKEN cDNA 1700081D17 gene 1700081D17Rik  
1430708\_a\_at 0.93702 ubiquitin specific petidase 45 Usp45  
1430709\_at 0.99132 RIKEN cDNA 4833405L11 gene 4833405L11Rik  
1430710\_at 1.06097 --- ---  
1430711\_at 1.01238 RIKEN cDNA 4933416E03 gene 4933416E03Rik  
1430712\_at 0.77846 Rho GTPase activating protein 24 Arhgap24  
1430713\_s\_at 0.87787 "NADH dehydrogenase (ubiquinone) 1 alpha subcomplex, 13" Ndufa13  
1430714\_at 1.04077 RIKEN cDNA 4930451C15 gene 4930451C15Rik  
1430715\_at 0.89578 RIKEN cDNA 2310014L17 gene 2310014L17Rik

|              |         |                                                      |      |                                     |
|--------------|---------|------------------------------------------------------|------|-------------------------------------|
| 1430716_at   | 0.98268 | RIKEN cDNA 5330421F07                                | gene | 5330421F07Rik                       |
| 1430717_at   | 0.93102 | RIKEN cDNA 4930403C10                                | gene | 4930403C10Rik                       |
| 1430718_s_at | 1.11092 | "zinc finger, CSL-type containing 3"                 |      | Zcs13                               |
| 1430719_at   | 0.91997 | RIKEN cDNA 4833447P13                                | gene | 4833447P13Rik                       |
| 1430720_at   | 1.24374 | Y box protein 1                                      |      | Ybx1                                |
| 1430721_at   | 0.91014 | RIKEN cDNA 4931431C16                                | gene | 4931431C16Rik                       |
| 1430722_at   | 0.91777 | RIKEN cDNA 4921515J06                                | gene | 4921515J06Rik                       |
| 1430723_at   | 0.98061 | "prenyl (solanesyl) diphosphate synthase, subunit 2" |      | Pdss2                               |
| 1430724_at   | 0.90458 | abhydrolase domain containing 9                      |      | Abhd9                               |
| 1430725_at   | 0.92953 | RIKEN cDNA 4933432I09                                | gene | 4933432I09Rik                       |
| 1430726_at   | 1.06027 | Ras association (RalGDS/AF-6) domain family 8        |      | Rassf8                              |
| 1430727_at   | 0.99844 | RIKEN cDNA 4930432O21                                | gene | 4930432O21Rik                       |
| 1430728_at   | 0.87830 | keratin associated protein 5-5                       |      | Krtap5-5                            |
| 1430729_at   | 0.91020 | melanocyte proliferating gene 1                      |      | Myg1                                |
| 1430730_at   | 1.11547 | RIKEN cDNA 9430024F10                                | gene | 9430024F10Rik                       |
| 1430731_at   | 0.95874 | keratin associated protein 2-4                       |      | Krtap2-4                            |
| 1430732_at   | 0.84770 | RIKEN cDNA 4921525D07                                | gene | 4921525D07Rik                       |
| 1430733_at   | 1.10226 | RIKEN cDNA 4932441P12                                | gene | 4932441P12Rik                       |
| 1430734_at   | 1.08281 | cytochrome b5 reductase 3                            |      | Cyb5r3                              |
| 1430735_at   | 0.99315 | RIKEN cDNA 4930424G05                                | gene | 4930424G05Rik                       |
| 1430736_at   | 1.01186 | "RIKEN cDNA 9030411M15                               | gene | /// similar to CG8486-PA, isoform A |
|              |         | similar to CG8486-PA, isoform A"                     |      | 9030411M15Rik                       |
|              |         |                                                      |      | /// LOC629416                       |
|              |         |                                                      |      | /// LOC667742                       |
| 1430737_at   | 1.01366 | RIKEN cDNA 2810409K11                                | gene | 2810409K11Rik                       |
| 1430738_at   | 0.92820 | RIKEN cDNA 4833419K08                                | gene | 4833419K08Rik                       |
| 1430739_at   | 0.98787 | RIKEN cDNA 4930471M09                                | gene | 4930471M09Rik                       |
| 1430740_at   | 0.91247 | ---                                                  |      | ---                                 |
| 1430741_at   | 0.98981 | RIKEN cDNA 4933433G08                                | gene | 4933433G08Rik                       |
| 1430742_a_at | 0.81148 | spermatogenesis associated 16                        |      | Spata16                             |
| 1430743_at   | 1.03083 | RIKEN cDNA 4930412F12                                | gene | 4930412F12Rik                       |
| 1430744_at   | 0.98765 | napsin A aspartic peptidase                          |      | Napsa                               |
| 1430745_at   | 0.93588 | RIKEN cDNA 5930409G06                                | gene | 5930409G06Rik                       |
| 1430746_at   | 1.05063 | RIKEN cDNA 1110050P16                                | gene | 1110050P16Rik                       |
| 1430747_at   | 1.03870 | PQ loop repeat containing 1                          |      | Pqlc1                               |
| 1430748_at   | 0.93460 | RIKEN cDNA 1810063B07                                | gene | 1810063B07Rik                       |
| 1430749_at   | 1.08359 | RIKEN cDNA 2810040C05                                | gene | 2810040C05Rik                       |
| 1430750_at   | 1.01071 | dihydrofolate reductase                              |      | Dhfr                                |
| 1430751_at   | 0.89243 | ---                                                  |      | ---                                 |
| 1430752_at   | 1.12014 | RIKEN cDNA C330006D17                                | gene | C330006D17Rik                       |
| 1430753_at   | 0.86546 | RIKEN cDNA 8030491N06                                | gene | 8030491N06Rik                       |
| 1430754_at   | 1.10553 | RIKEN cDNA 4930511H11                                | gene | 4930511H11Rik                       |
| 1430755_at   | 0.98864 | RIKEN cDNA 4930452G13                                | gene | 4930452G13Rik                       |
| 1430756_at   | 1.07511 | RIKEN cDNA 5430427G11                                | gene | 5430427G11Rik                       |
| 1430757_at   | 1.07023 | RIKEN cDNA A330102H22                                | gene | A330102H22Rik                       |

1430758\_x\_at 0.94847 breast carcinoma amplified sequence 1 Bcas1  
1430759\_at 1.00113 RIKEN cDNA 4930523C07 gene 4930523C07Rik  
1430760\_a\_at 0.92262 ubiquitin specific peptidase 50 Usp50  
1430761\_at 1.01029 RIKEN cDNA 0610039K10 gene 0610039K10Rik  
1430762\_at 1.06062 RIKEN cDNA 4833427G06 gene 4833427G06Rik  
1430763\_at 0.95868 RIKEN cDNA 4930563E22 gene 4930563E22Rik  
1430764\_at 0.91421 RIKEN cDNA 1700023F06 gene 1700023F06Rik  
1430765\_at 1.15482 RIKEN cDNA 5730521K06 gene 5730521K06Rik  
1430766\_at 0.92697 RIKEN cDNA 5033403F01 gene 5033403F01Rik  
1430767\_a\_at 1.02101 RIKEN cDNA 4930543E12 gene 4930543E12Rik  
1430768\_at 0.88694 RIKEN cDNA 9530018H14 gene 9530018H14Rik  
1430769\_s\_at 0.94551 RIKEN cDNA 2900009I07 gene 2900009I07Rik  
1430770\_at 0.95809 RIKEN cDNA 3110080E11 gene 3110080E11Rik  
1430771\_a\_at 1.06276 mutS homolog 5 (E. coli) Msh5  
1430772\_at 0.80254 --- ---  
1430773\_a\_at 1.09351 t-complex-associated testis expressed 2 Tcte2  
1430774\_at 1.66431 RIKEN cDNA A430106A12 gene A430106A12Rik  
1430775\_at 0.99540 WD repeat domain 44 Wdr44  
1430776\_s\_at 0.92969 ankyrin repeat domain 24 Ankrd24  
1430777\_a\_at 0.93827 golgi phosphoprotein 3 Golph3  
1430778\_a\_at 1.19278 nucleotide binding protein 1 Nubp1  
1430779\_at 0.83520 netrin G1 Ntng1  
1430780\_a\_at 0.90265 phosphomannomutase 1 Pmm1  
1430781\_at 0.92019 adenylate kinase 7 Ak7  
1430782\_at 1.18633 RIKEN cDNA B130055D15 gene B130055D15Rik  
1430783\_at 0.96204 RIKEN cDNA 4932416J16 gene 4932416J16Rik  
1430784\_a\_at 1.06329 RIKEN cDNA 4932417H02 gene 4932417H02Rik  
1430785\_at 1.01960 orphan short chain dehydrogenase/reductase Sdro  
1430786\_at 1.07684 RIKEN cDNA 1110002E22 gene 1110002E22Rik  
1430787\_at 1.06200 RIKEN cDNA 2310050B05 gene 2310050B05Rik  
1430788\_at 1.02699 --- ---  
1430789\_at 1.04188 RIKEN cDNA 4930452B06 gene 4930452B06Rik  
1430790\_at 1.03175 RIKEN cDNA 4930485G23 gene 4930485G23Rik  
1430791\_at 0.94193 RIKEN cDNA 6330415B21 gene 6330415B21Rik  
1430792\_at 1.43133 --- ---  
1430793\_at 0.93571 RIKEN cDNA 4931429I11 gene 4931429I11Rik  
1430794\_at 1.06650 RIKEN cDNA 4933426K07 gene 4933426K07Rik  
1430795\_at 1.04332 RIKEN cDNA 5830407F19 gene 5830407F19Rik  
1430796\_at 1.13651 tripartite motif-containing 14 Trim14  
1430797\_at 1.10694 exportin 4 Xpo4  
1430798\_x\_at 1.13059 mitochondrial ribosomal protein L15 Mrpl15  
1430799\_at 0.99156 RIKEN cDNA 5830432E09 gene 5830432E09Rik  
1430800\_at 0.97058 RIKEN cDNA 4930518F22 gene 4930518F22Rik



1430801\_at 0.97311 RIKEN cDNA 2310042E16 gene /// vacuolar protein sorting 13B (yeast) /// similar to vacuolar protein sorting 13B isoform 4 /// region containing RIKEN cDNA C330002D13 gene; RIKEN cDNA 2310042E16 gene; vacuolar protein sorting 13B (yeast) 2310042E16Rik /// Vps13b /// LOC666173 /// LOC669978  
 1430802\_at 1.04606 "histocompatibility 2, Q region locus 8" H2-Q8  
 1430803\_at 0.97664 lin-28 homolog B (C. elegans) Lin28b  
 1430804\_at 0.98983 "solute carrier family 13 (sodium/sulphate symporters), member 1" Slc13a1  
 1430805\_s\_at 1.00129 "RMI1, RecQ mediated genome instability 1, homolog (S. cerevisiae)" Rmi1  
 1430806\_at 0.91132 RIKEN cDNA 2810047F03 gene 2810047F03Rik  
 1430807\_at 0.95530 kelch-like 22 (Drosophila) Klh22  
 1430808\_at 1.28199 "TBC1 domain family, member 5" Tbc1d5  
 1430809\_at 1.02021 Frizzled homolog 5 (Drosophila) Fzd5  
 1430810\_at 0.93863 RIKEN cDNA 5730409E15 gene 5730409E15Rik  
 1430811\_a\_at 0.98069 cell division cycle associated 1 Cdca1  
 1430812\_at 0.92963 RIKEN cDNA 4930511A02 gene 4930511A02Rik  
 1430813\_at 0.96236 RIKEN cDNA 1810057I13 gene 1810057I13Rik  
 1430814\_at 1.12880 "RIKEN cDNA 1300013D18 gene /// similar to cytochrome P450, family 2, subfamily d, polypeptide 13" 1300013D18Rik /// LOC271300  
 1430815\_at 0.79323 RIKEN cDNA 4930534B04 gene 4930534B04Rik  
 1430816\_at 0.98448 RIKEN cDNA 3110003A22 gene 3110003A22Rik  
 1430817\_at 0.99514 sterile alpha motif domain containing 7 Samd7  
 1430818\_at 1.09363 transmembrane channel-like gene family 1 Tmc1  
 1430819\_at 1.01024 N-acylsphingosine amidohydrolase (acid ceramidase)-like Asah1  
 1430820\_a\_at 1.06943 bobby sox homolog (Drosophila) Bbx  
 1430821\_at 1.08034 RIKEN cDNA 1700024C24 gene 1700024C24Rik  
 1430822\_at 1.07437 "SWI/SNF related, matrix associated, actin dependent regulator of chromatin, subfamily e, member 1" Smarce1  
 1430823\_at 0.97591 RIKEN cDNA 2700029L08 gene 2700029L08Rik  
 1430824\_at 1.03758 Rho GTPase activating protein 23 Arhgap23  
 1430825\_at 1.17170 RIKEN cDNA E130102C15 gene E130102C15Rik  
 1430826\_s\_at 1.39918 "glucosaminyl (N-acetyl) transferase 2, I-branching enzyme" Gcnt2  
 1430827\_a\_at 1.06165 PTK2 protein tyrosine kinase 2 Ptk2  
 1430828\_at 1.07475 tRNA 5-methylaminomethyl-2-thiouridylate methyltransferase Trmu  
 1430829\_s\_at 0.94185 fatso Fto  
 1430830\_at 1.09546 RIKEN cDNA A430105J06 gene A430105J06Rik  
 1430831\_at 0.96695 RIKEN cDNA 4930404J24 gene 4930404J24Rik  
 1430832\_at 0.92317 RIKEN cDNA 4930426I24 gene 4930426I24Rik  
 1430833\_at 0.90999 IL2-inducible T-cell kinase Itk  
 1430834\_at 1.04210 --- ---  
 1430835\_at 1.07465 RIKEN cDNA 5830436D01 gene 5830436D01Rik  
 1430836\_at 0.95650 RIKEN cDNA 4933437G19 gene 4933437G19Rik  
 1430837\_a\_at 0.90020 methyl-CpG binding domain protein 1 Mbd1  
 1430838\_x\_at 0.89594 methyl-CpG binding domain protein 1 Mbd1

|              |         |                                                                                                      |                                |               |
|--------------|---------|------------------------------------------------------------------------------------------------------|--------------------------------|---------------|
| 1430839_at   | 0.96535 | RIKEN cDNA 9430076G02                                                                                | gene                           | 9430076G02Rik |
| 1430840_at   | 0.98303 | RIKEN cDNA 4930449C09                                                                                | gene                           | 4930449C09Rik |
| 1430841_at   | 1.10884 | RIKEN cDNA 3300002P13                                                                                | gene                           | 3300002P13Rik |
| 1430842_at   | 0.96457 | RIKEN cDNA 1500002F19                                                                                | gene                           | 1500002F19Rik |
| 1430843_at   | 1.07132 | glutamate decarboxylase-like 1                                                                       | Gad1l                          |               |
| 1430844_at   | 0.88887 | RIKEN cDNA 1700018M17                                                                                | gene                           | 1700018M17Rik |
| 1430845_at   | 0.93510 | RIKEN cDNA 2410018L13                                                                                | gene                           | 2410018L13Rik |
| 1430846_at   | 0.88004 | RIKEN cDNA 1700061G19                                                                                | gene                           | 1700061G19Rik |
| 1430847_a_at | 1.05793 | cAMP responsive element modulator                                                                    | Crem                           |               |
| 1430848_a_at | 0.94585 | RIKEN cDNA 2410017P07                                                                                | gene                           | 2410017P07Rik |
| 1430849_a_at | 0.89700 | cell growth regulator with ring finger domain 1                                                      | Cgrrf1                         |               |
| 1430850_x_at | 1.06772 | cell growth regulator with ring finger domain 1                                                      | Cgrrf1                         |               |
| 1430851_at   | 1.08461 | zinc finger protein 444                                                                              | Zfp444                         |               |
| 1430852_at   | 1.09815 | RIKEN cDNA 1600029I14                                                                                | gene                           | 1600029I14Rik |
| 1430853_a_at | 1.07037 | RIKEN cDNA 3110045G13                                                                                | gene                           | 3110045G13Rik |
| 1430854_at   | 0.90607 | "asparagine-linked glycosylation 5 homolog (yeast, dolichyl-phosphate beta-glucosyltransferase)"     | Alg5                           |               |
| 1430855_at   | 0.86176 | "collagen, type XX, alpha 1"                                                                         | Col20a1                        |               |
| 1430856_at   | 0.87873 | peroxisomal biogenesis factor 11c                                                                    | Pex11c                         |               |
| 1430857_s_at | 1.03879 | peroxisomal biogenesis factor 11c                                                                    | Pex11c                         |               |
| 1430858_at   | 1.00716 | RIKEN cDNA 4632433K11                                                                                | gene                           | 4632433K11Rik |
| 1430859_at   | 0.95080 | RIKEN cDNA 5330427O13                                                                                | gene                           | 5330427O13Rik |
| 1430860_at   | 1.10878 | RIKEN cDNA 4833422M21                                                                                | gene                           | 4833422M21Rik |
| 1430861_at   | 1.03471 | RIKEN cDNA 2010111I01                                                                                | gene                           | 2010111I01Rik |
| 1430862_at   | 1.11349 | RIKEN cDNA 2310057M21                                                                                | gene                           | 2310057M21Rik |
| 1430863_at   | 0.98788 | RIKEN cDNA 4933411B09                                                                                | gene                           | 4933411B09Rik |
| 1430864_at   | 0.85176 | tubulin tyrosine ligase like family 9                                                                | Ttl19                          |               |
| 1430865_s_at | 1.12210 | tubulin tyrosine ligase like family 9                                                                | Ttl19                          |               |
| 1430866_at   | 0.91090 | RIKEN cDNA 4921537D05                                                                                | gene                           | 4921537D05Rik |
| 1430867_at   | 0.97989 | RIKEN cDNA 4933431M02                                                                                | gene                           | 4933431M02Rik |
| 1430868_at   | 0.95001 | RIKEN cDNA 5830403M04                                                                                | gene                           | 5830403M04Rik |
| 1430869_a_at | 0.93765 | homeo box C13 /// hyaluronic acid binding protein 4 /// similar to hyaluronic acid binding protein 4 | Hoxc13 /// Habp4 /// LOC671769 |               |
| 1430870_at   | 0.87177 | RIKEN cDNA 4930442P19                                                                                | gene                           | 4930442P19Rik |
| 1430871_at   | 1.04903 | "phospholipase C, beta 4"                                                                            | Plcb4                          |               |
| 1430872_at   | 1.07507 | RIKEN cDNA 4930412O13                                                                                | gene                           | 4930412O13Rik |
| 1430873_at   | 1.16592 | ---                                                                                                  | ---                            |               |
| 1430874_at   | 1.01239 | RIKEN cDNA 9430085M18                                                                                | gene                           | 9430085M18Rik |
| 1430875_a_at | 1.07918 | PAK1 interacting protein 1                                                                           | Pak1ip1                        |               |
| 1430876_at   | 1.01454 | RIKEN cDNA 2610312I10                                                                                | gene                           | 2610312I10Rik |
| 1430877_at   | 1.04964 | RIKEN cDNA 8030425K09                                                                                | gene                           | 8030425K09Rik |
| 1430878_at   | 1.01893 | RIKEN cDNA 2210406H18                                                                                | gene                           | 2210406H18Rik |
| 1430879_at   | 1.03454 | RIKEN cDNA C030008P14                                                                                | gene                           | C030008P14Rik |

|              |         |                                                             |                    |
|--------------|---------|-------------------------------------------------------------|--------------------|
| 1430880_at   | 0.88930 | pleckstrin and Sec7 domain containing 3                     | Psd3               |
| 1430881_at   | 0.96800 | RIKEN cDNA 7630403G23                                       | gene 7630403G23Rik |
| 1430882_at   | 0.86819 | ---                                                         | ---                |
| 1430883_at   | 1.01461 | RIKEN cDNA 4933402C05                                       | gene 4933402C05Rik |
| 1430884_at   | 0.98311 | RIKEN cDNA 4930568G15                                       | gene 4930568G15Rik |
| 1430885_at   | 0.91758 | RIKEN cDNA 1110012N22                                       | gene 1110012N22Rik |
| 1430886_at   | 0.90059 | RIKEN cDNA 1700112E06                                       | gene 1700112E06Rik |
| 1430887_s_at | 1.04342 | RIKEN cDNA 1700112E06                                       | gene 1700112E06Rik |
| 1430888_at   | 0.99614 | RIKEN cDNA 4930535E21                                       | gene 4930535E21Rik |
| 1430889_a_at | 0.97252 | thiopurine methyltransferase                                | Tpmt               |
| 1430890_at   | 1.05850 | RIKEN cDNA 2210010C17                                       | gene 2210010C17Rik |
| 1430891_at   | 0.88274 | dual specificity phosphatase 12                             | Dusp12             |
| 1430892_at   | 0.99099 | RIKEN cDNA 1700011F03                                       | gene 1700011F03Rik |
| 1430893_at   | 1.11498 | major urinary protein 1                                     | Mup1               |
| 1430894_at   | 0.98230 | RIKEN cDNA 5530401N12                                       | gene 5530401N12Rik |
| 1430895_at   | 0.89494 | RIKEN cDNA 2010109A12                                       | gene 2010109A12Rik |
| 1430896_s_at | 1.07791 | nudix (nucleoside diphosphate linked moiety X)-type motif 7 | Nudt7              |
| 1430897_at   | 0.95199 | RIKEN cDNA 4931428L18                                       | gene 4931428L18Rik |
| 1430898_s_at | 1.02584 | RIKEN cDNA 4931428L18                                       | gene 4931428L18Rik |
| 1430899_at   | 0.97916 | "mucin 5, subtypes A and C, tracheobronchial/gastric"       | Muc5ac             |
| 1430900_at   | 0.95148 | RIKEN cDNA 4930430O22                                       | gene 4930430O22Rik |
| 1430901_at   | 1.02354 | RIKEN cDNA 1700003F17                                       | gene 1700003F17Rik |
| 1430902_at   | 1.06535 | ankyrin repeat domain 24                                    | Ankrd24            |
| 1430903_at   | 0.89049 | RIKEN cDNA 4933416O17                                       | gene 4933416O17Rik |
| 1430904_at   | 1.08887 | ADP-ribosylation factor GTPase activating protein 3         | Arfgap3            |
| 1430905_at   | 1.04228 | RIKEN cDNA 4921504E06                                       | gene 4921504E06Rik |
| 1430906_at   | 1.00018 | RIKEN cDNA 2510016G02                                       | gene 2510016G02Rik |
| 1430907_at   | 1.05981 | RIKEN cDNA 4930455J16                                       | gene 4930455J16Rik |
| 1430908_at   | 0.94016 | RIKEN cDNA 4933429O19                                       | gene 4933429O19Rik |
| 1430909_at   | 0.88563 | nucleoporin 210-like                                        | Nup210l            |
| 1430910_at   | 1.01328 | RIKEN cDNA 4930544L04                                       | gene 4930544L04Rik |
| 1430911_at   | 1.06543 | "DNA segment, Chr 19, ERATO Doi 652, expressed"             | D19Ertd652e        |
| 1430912_a_at | 1.04426 | tectorin beta                                               | Tectb              |
| 1430913_at   | 0.85293 | RIKEN cDNA 1810033M07                                       | gene 1810033M07Rik |
| 1430914_at   | 1.02970 | RIKEN cDNA 5330426L24                                       | gene 5330426L24Rik |
| 1430915_at   | 0.93798 | fibronectin type III domain containing 8                    | Fndc8              |
| 1430916_at   | 1.32397 | "Fanconi anemia, complementation group D2"                  | Fancd2             |
| 1430917_at   | 0.84658 | RIKEN cDNA 9130401L11                                       | gene 9130401L11Rik |
| 1430918_at   | 0.98232 | membrane-associated ring finger (C3HC4) 3                   | 3-Mar              |
| 1430919_at   | 0.90334 | RIKEN cDNA 4930525F21                                       | gene 4930525F21Rik |
| 1430920_at   | 1.18157 | RIKEN cDNA 2410075D05                                       | gene 2410075D05Rik |
| 1430921_at   | 0.89747 | RIKEN cDNA 9130015G15                                       | gene 9130015G15Rik |
| 1430922_at   | 1.02653 | RIKEN cDNA 5530401A14                                       | gene 5530401A14Rik |

|            |         |                                                                 |      |               |
|------------|---------|-----------------------------------------------------------------|------|---------------|
| 1430923_at | 1.09819 | RIKEN cDNA 2610300M13                                           | gene | 2610300M13Rik |
| 1430924_at | 0.98058 | RIKEN cDNA 4933440M02                                           | gene | 4933440M02Rik |
| 1430925_at | 1.02782 | RIKEN cDNA 4930556L07                                           | gene | 4930556L07Rik |
| 1430926_at | 1.04189 | tetratricopeptide repeat domain 18                              |      | Ttc18         |
| 1430927_at | 1.02156 | CEA-related cell adhesion molecule 1                            |      | Ceacam18      |
| 1430928_at | 0.99159 | RIKEN cDNA 2900002J02                                           | gene | 2900002J02Rik |
| 1430929_at | 1.14629 | RIKEN cDNA 9430082L08                                           | gene | 9430082L08Rik |
| 1430930_at | 1.01708 | RIKEN cDNA 0610038B21                                           | gene | 0610038B21Rik |
| 1430931_at | 0.90162 | RIKEN cDNA 4933403O03                                           | gene | 4933403O03Rik |
| 1430932_at | 1.29647 | "solute carrier family 9 (sodium/hydrogen exchanger), member 8" |      | Slc9a8        |
| 1430933_at | 0.85976 | RIKEN cDNA 5730433K22                                           | gene | 5730433K22Rik |
| 1430934_at | 0.83782 | RIKEN cDNA 2810043G22                                           | gene | 2810043G22Rik |
| 1430935_at | 1.10825 | RIKEN cDNA 4933413G19                                           | gene | 4933413G19Rik |
| 1430936_at | 1.10436 | "CHMP family, member 7"                                         |      | Chmp7         |
| 1430937_at | 1.14060 | RIKEN cDNA A930016O22                                           | gene | A930016O22Rik |
| 1430938_at | 1.00191 | zinc finger protein 64                                          |      | Zfp64         |
| 1430939_at | 0.95748 | RIKEN cDNA 4930528D03                                           | gene | 4930528D03Rik |
| 1430940_at | 1.68694 | RIKEN cDNA 3110045A19                                           | gene | 3110045A19Rik |
| 1430941_at | 1.12212 | Bardet-Biedl syndrome 7                                         |      | Bbs7          |
| 1430942_at | 1.35624 | RIKEN cDNA 8430437O03                                           | gene | 8430437O03Rik |
| 1430943_at | 0.95786 | RIKEN cDNA 6030498E09                                           | gene | 6030498E09Rik |
| 1430944_at | 1.09932 | RIKEN cDNA A930030B08                                           | gene | A930030B08Rik |
| 1430945_at | 0.92311 | RIKEN cDNA A930028C08                                           | gene | A930028C08Rik |
| 1430946_at | 1.04694 | RIKEN cDNA 2600014E21                                           | gene | 2600014E21Rik |
| 1430947_at | 0.90184 | RIKEN cDNA 4930549C15                                           | gene | 4930549C15Rik |
| 1430948_at | 0.95978 | RIKEN cDNA 4921525B02                                           | gene | 4921525B02Rik |
| 1430949_at | 0.93049 | RIKEN cDNA 9130231A04                                           | gene | 9130231A04Rik |
| 1430950_at | 0.99554 | odd-skipped related 2 (Drosophila)                              |      | Osr2          |
| 1430951_at | 0.99925 | RIKEN cDNA 2810011L19                                           | gene | 2810011L19Rik |
| 1430952_at | 1.03472 | RIKEN cDNA 3110039C02                                           | gene | 3110039C02Rik |
| 1430953_at | 1.05257 | RIKEN cDNA 3200001G23                                           | gene | 3200001G23Rik |
| 1430954_at | 1.00934 | peptidylprolyl isomerase (cyclophilin)-like 3                   |      | Ppil3         |
| 1430955_at | 1.05871 | RIKEN cDNA 2810403A07                                           | gene | 2810403A07Rik |
| 1430956_at | 0.95504 | "Protease, serine, 23"                                          |      | Prss23        |
| 1430957_at | 0.99721 | Rho GTPase activating protein 26                                |      | Arhgap26      |
| 1430958_at | 1.07430 | RIKEN cDNA 4933430N04                                           | gene | 4933430N04Rik |
| 1430959_at | 0.90617 | RIKEN cDNA 4930546H06                                           | gene | 4930546H06Rik |
| 1430960_at | 1.00774 | RIKEN cDNA 4933440J02                                           | gene | 4933440J02Rik |
| 1430961_at | 0.99662 | zinc finger protein 292                                         |      | Zfp292        |
| 1430962_at | 1.12190 | ubiquitin-conjugating enzyme E2S                                |      | Ube2s         |
| 1430963_at | 0.92256 | "glucosaminyl (N-acetyl) transferase 3, mucin type"             |      | Gcnt3         |
| 1430964_at | 1.01004 | RIKEN cDNA 2310034O05                                           | gene | 2310034O05Rik |
| 1430965_at | 1.02411 | RIKEN cDNA 9430064K01                                           | gene | 9430064K01Rik |

1430966\_at 0.90761 camello-like 3 Cml3  
1430967\_at 1.07667 RIKEN cDNA 3110080O07 gene 3110080O07Rik  
1430968\_at 1.08705 RIKEN cDNA 4930517O19 gene 4930517O19Rik  
1430969\_at 1.34870 mitochondrial carrier homolog 2 (C. elegans) Mtch2  
1430970\_a\_at 0.97486 RIKEN cDNA 4930438O03 gene 4930438O03Rik  
1430971\_a\_at 1.01961 aquarius Aqr  
1430972\_x\_at 1.14348 aquarius Aqr  
1430973\_at 1.02656 zinc finger protein 558 Zfp558  
1430974\_a\_at 1.05125 SUMO1/sentrin specific peptidase 7 Senp7  
1430975\_at 1.05604 RIKEN cDNA 8430416G17 gene 8430416G17Rik  
1430976\_a\_at 0.90211 mitochondrial ribosomal protein L9 Mrpl9  
1430977\_at 0.87645 RIKEN cDNA A930021C24 gene A930021C24Rik  
1430978\_at 1.24899 ribosomal protein S25 Rps25  
1430979\_a\_at 0.98940 peroxiredoxin 2 Prdx2  
1430980\_a\_at 1.14838 eukaryotic translation initiation factor 4A1 Eif4a1  
1430981\_s\_at 0.92689 GC-rich promoter binding protein 1 Gbp1  
1430982\_at 1.03133 "splicing factor, arginine/serine-rich 1 (ASF/SF2)" Sfrs1  
1430983\_at 1.06431 protein disulfide isomerase associated 6 Pdia6  
1430984\_at 0.92522 antizyme inhibitor 1 Azin1  
1430985\_at 1.05388 RIKEN cDNA 1810027O10 gene 1810027O10Rik  
1430986\_at 1.05164 "phenylalanine-tRNA synthetase-like, beta subunit" Farslb  
1430987\_s\_at 0.94549 WW domain binding protein 11 Wbp11  
1430988\_at 0.92977 RIKEN cDNA 2810407C02 gene 2810407C02Rik  
1430989\_a\_at 0.98606 RIKEN cDNA 1700020I14 gene 1700020I14Rik  
1430990\_s\_at 0.98121 mitochondrial ribosomal protein L44 Mrpl44  
1430991\_at 1.02975 RIKEN cDNA 1810014B01 gene 1810014B01Rik  
1430992\_s\_at 1.10468 RIKEN cDNA 1500009M05 gene 1500009M05Rik  
1430993\_at 0.98256 ubiquitin associated protein 2-like Ubap2l  
1430994\_at 1.06142 membrane-associated ring finger (C3HC4) 5 5-Mar  
1430995\_at 1.10028 --- ---  
1430996\_at 0.92995 ethanolamine kinase 1 Etnk1  
1430997\_at 1.04402 "CD47 antigen (Rh-related antigen, integrin-associated signal transducer)"  
Cd47  
1430998\_at 0.87742 sulfide quinone reductase-like (yeast) Sqrdl  
1430999\_a\_at 0.91567 short coiled-coil protein Scoc  
1431000\_at 0.88120 RIKEN cDNA 2310002B06 gene 2310002B06Rik  
1431001\_at 0.93057 RIKEN cDNA 9030624J02 gene 9030624J02Rik  
1431002\_x\_at 0.93567 fumarylacetoacetate hydrolase domain containing 2A Fahd2a  
1431003\_a\_at 1.01948 RIKEN cDNA 2610002J02 gene 2610002J02Rik  
1431004\_at 1.19403 lysyl oxidase-like 2 Loxl2  
1431005\_at 0.91226 "DNA segment, Chr 10, Wayne State University 102, expressed" D10Wsu102e  
1431006\_at 1.06126 --- ---  
1431007\_at 1.08651 RIKEN cDNA 9030025P20 gene 9030025P20Rik

1431008\_at 1.31628 RIKEN cDNA 0610037M15 gene 0610037M15Rik  
1431009\_at 0.88208 RIKEN cDNA B230219D22 gene B230219D22Rik  
1431010\_a\_at 1.01190 retinol dehydrogenase 12 Rdh12  
1431011\_at 1.03380 dihydrolipoamide S-succinyltransferase (E2 component of 2-oxo-glutarate complex) Dlst  
1431012\_a\_at 0.89242 "peroxisomal delta3, delta2-enoyl-Coenzyme A isomerase" Peci  
1431013\_at 0.94603 "proteasome (prosome, macropain) 26S subunit, non-ATPase, 11 /// similar to 26S proteasome non-ATPase regulatory subunit 11 (26S proteasome regulatory subunit S9) (26S proteasome regulatory subunit p44.5) /// similar to 26S proteasome non-ATPase regulatory subunit 11 (26S proteasome regulatory subunit S9) (26S proteasome regulatory subunit p44.5)" Psm11 /// LOC627316 /// LOC671671  
1431014\_at 0.99838 "cat eye syndrome chromosome region, candidate 2 homolog (human)" Cacr2  
1431015\_at 0.91293 transmembrane protein 129 Tmem129  
1431016\_at 1.09974 "CWF19-like 1, cell cycle control (S. pombe)" Cwf19l1  
1431017\_at 1.06408 regulator of chromosome condensation (RCC1) and BTB (POZ) domain containing protein 2 Rcbtb2  
1431018\_at 1.09470 RIKEN cDNA 1810013L24 gene 1810013L24Rik  
1431019\_at 1.03516 leucine rich repeat containing 28 Lrrc28  
1431020\_a\_at 1.10966 FGFR1 oncogene partner 2 Fgfr1op2  
1431021\_at 0.93779 cytochrome b-561 domain containing 1 Cyb561d1  
1431022\_at 1.12582 "synuclein, alpha" Snca  
1431023\_at 0.96406 RIKEN cDNA C030046E11 gene C030046E11Rik  
1431024\_a\_at 0.96068 AT rich interactive domain 4B (Rbp1 like) Arid4b  
1431025\_at 1.01600 fuzzy homolog (Drosophila) Fuz  
1431026\_at 1.02458 N-acetyltransferase 12 Nat12  
1431027\_at 1.03279 RIKEN cDNA 2810455O05 gene 2810455O05Rik  
1431028\_a\_at 1.04900 pantothenate kinase 1 Pank1  
1431029\_at 1.04605 tubulin tyrosine ligase like family 9 Ttl9  
1431030\_a\_at 0.94149 ring finger protein 14 Rnf14  
1431031\_at 0.87107 AT rich interactive domain 4B (Rbp1 like) Arid4b  
1431032\_at 1.14681 "amylo-1,6-glucosidase, 4-alpha-glucanotransferase" Agl  
1431033\_x\_at 0.99553 "amylo-1,6-glucosidase, 4-alpha-glucanotransferase" Agl  
1431034\_at 0.99323 G protein-coupled receptor 125 Gpr125  
1431035\_at 1.04942 dishevelled associated activator of morphogenesis 1 Daam1  
1431036\_a\_at 0.93328 transmembrane emp24 domain trafficking protein 2 Tmed2  
1431037\_a\_at 0.94021 "ELAV (embryonic lethal, abnormal vision, Drosophila)-like 1 (Hu antigen R)" Elavl1  
1431038\_at 1.14734 Ras association (RalGDS/AF-6) domain family 4 Rassf4  
1431039\_at 1.03744 OTU domain containing 4 Otud4  
1431040\_at 0.99525 RIKEN cDNA 6530401N04 gene /// hypothetical protein LOC638977 6530401N04Rik /// LOC638977  
1431041\_at 0.97643 GTP-binding protein 8 (putative) Gtpbp8

|              |         |                                                                      |               |
|--------------|---------|----------------------------------------------------------------------|---------------|
| 1431042_at   | 0.90156 | progesterin and adipoQ receptor family member VIII                   | Paqr8         |
| 1431043_at   | 0.90062 | kelch repeat and BTB (POZ) domain containing 5                       | Kbtbd5        |
| 1431044_at   | 1.82315 | THO complex 1                                                        | Thoc1         |
| 1431045_at   | 0.98942 | "DNA segment, Chr 12, ERATO Doi 553, expressed"                      | D12ErtD553e   |
| 1431046_at   | 0.95905 | RIKEN cDNA 2410127E16 gene                                           | 2410127E16Rik |
| 1431047_at   | 0.88048 | chromodomain helicase DNA binding protein 6                          | Chd6          |
| 1431048_at   | 1.21806 | phosphoserine/threonine/tyrosine interaction protein                 | Styx          |
| 1431049_at   | 1.04864 | islet cell autoantigen 1-like                                        | Ica11         |
| 1431050_at   | 0.87066 | "ribosomal protein S6 kinase, polypeptide 5"                         | Rps6ka5       |
| 1431051_at   | 0.92928 | RIKEN cDNA 4930577N17 gene                                           | 4930577N17Rik |
| 1431052_at   | 0.72763 | Rho GTPase activating protein 12                                     | Arhgap12      |
| 1431053_at   | 1.05754 | M-phase phosphoprotein 9                                             | Mphosph9      |
| 1431054_at   | 1.05350 | "LSM6 homolog, U6 small nuclear RNA associated (S. cerevisiae)"      | Lsm6          |
| 1431055_a_at | 1.07510 | sorting nexin 10                                                     | Snx10         |
| 1431056_a_at | 0.61094 | lipoprotein lipase /// similar to Lipoprotein lipase precursor (LPL) | Lpl ///       |
| LOC669888    |         |                                                                      |               |
| 1431057_a_at | 1.04885 | "protease, serine, 23"                                               | Prss23        |
| 1431058_at   | 1.00895 | HIV TAT specific factor 1                                            | Htatsf1       |
| 1431059_x_at | 0.82415 | HIV TAT specific factor 1                                            | Htatsf1       |
| 1431060_at   | 1.65614 | pellino 1                                                            | Peli1         |
| 1431061_s_at | 0.91987 | pellino 1                                                            | Peli1         |
| 1431062_a_at | 1.04181 | exocyst complex component 4                                          | Exoc4         |
| 1431063_at   | 0.74580 | ---                                                                  | ---           |
| 1431064_at   | 0.90845 | dipeptidylpeptidase 8                                                | Dpp8          |
| 1431065_at   | 1.09405 | ELL associated factor 1                                              | Eaf1          |
| 1431066_at   | 0.95246 | fucosyltransferase 11                                                | Fut11         |
| 1431067_at   | 0.89040 | RIKEN cDNA 6330404A07 gene                                           | 6330404A07Rik |
| 1431068_at   | 0.87985 | required for meiotic nuclear division 5 homolog A (S. cerevisiae)    | Rmnd5a        |
| 1431069_at   | 0.92363 | RIKEN cDNA 4930544G21 gene                                           | 4930544G21Rik |
| 1431070_a_at | 0.93100 | RIKEN cDNA 9130404D08 gene                                           | 9130404D08Rik |
| 1431071_at   | 0.85534 | metaxin 3                                                            | Mtx3          |
| 1431072_a_at | 1.03283 | coiled-coil domain containing 50                                     | Ccdc50        |
| 1431073_at   | 1.10947 | protein prenyltransferase alpha subunit repeat containing 1          | Ptar1         |
| 1431074_a_at | 0.86005 | "phosphatidylinositol transfer protein, cytoplasmic 1"               | Pitpnc1       |
| 1431075_a_at | 0.97641 | eukaryotic translation initiation factor 4E nuclear import factor 1  | Eif4enif1     |
| 1431076_at   | 0.94900 | adducin 2 (beta)                                                     | Add2          |
| 1431077_at   | 1.10430 | "alkaline phosphatase, intestinal"                                   | Alpi          |
| 1431078_at   | 0.97475 | F-box only protein 3                                                 | Fbxo3         |
| 1431079_at   | 1.02745 | C1q and tumor necrosis factor related protein 2                      | C1qtnf2       |
| 1431080_at   | 0.96507 | RIKEN cDNA 1700021K10 gene                                           | 1700021K10Rik |
| 1431081_a_at | 0.90125 | phospholipid scramblase 3                                            | Plscr3        |
| 1431082_a_at | 0.96324 | "RAB, member of RAS oncogene family-like 3"                          | Rab13         |
| 1431083_a_at | 0.89407 | RIKEN cDNA 1810014B01 gene                                           | 1810014B01Rik |

1431084\_x\_at 0.95556 RIKEN cDNA 1810014B01 gene 1810014B01Rik  
1431085\_a\_at 1.04525 protein-L-isoaspartate (D-aspartate) O-methyltransferase 1 Pcmt1  
1431086\_s\_at 1.08779 protein-L-isoaspartate (D-aspartate) O-methyltransferase 1 Pcmt1  
1431087\_at 1.03993 spindle pole body component 24 homolog (S. cerevisiae) Spbc24  
1431088\_at 0.89674 forkhead box P4 Foxp4  
1431089\_at 0.95483 cleavage and polyadenylation specific factor 2 Cpsf2  
1431090\_at 0.87480 Ssu72 RNA polymerase II CTD phosphatase homolog (yeast) Ssu72  
1431091\_at 1.02331 pygopus 1 Pygo1  
1431092\_at 0.89595 "protein phosphatase 1, regulatory (inhibitor) subunit 12C" Ppp1r12c  
1431093\_at 1.02700 nephronophthisis 3 (adolescent) Nphp3  
1431094\_at 1.06904 RIKEN cDNA 1110006E14 gene 1110006E14Rik  
1431095\_a\_at 0.86864 hect domain and RLD 5 Herc5  
1431096\_at 1.03266 integrator complex subunit 8 Ints8  
1431097\_at 0.85296 GTPase activating RANGAP domain-like 1 Garnl1  
1431098\_at 0.93135 restin (Reed-Steinberg cell-expressed intermediate filament-associated protein)  
Rsn  
1431099\_at 0.99052 homeo box D8 Hoxd8  
1431100\_at 1.01882 RIKEN cDNA 9930116N10 gene 9930116N10Rik  
1431101\_a\_at 0.93712 steroid 5 alpha-reductase 1 Srd5a1  
1431102\_at 0.96820 centrosomal protein 350 Cep350  
1431103\_at 0.94009 RIKEN cDNA 1700003P14 gene 1700003P14Rik  
1431104\_at 0.98401 RIKEN cDNA 4930522H14 gene 4930522H14Rik  
1431105\_a\_at 1.02098 transmembrane protein 33 Tmem33  
1431106\_a\_at 0.92756 RIKEN cDNA 9530053H05 gene 9530053H05Rik  
1431107\_at 0.95239 serine/threonine kinase 35 Stk35  
1431108\_at 0.83348 RIKEN cDNA 2410131K14 gene 2410131K14Rik  
1431109\_at 0.91403 RIKEN cDNA 5430406M13 gene 5430406M13Rik  
1431110\_at 1.03944 RIKEN cDNA 5430431D22 gene 5430431D22Rik  
1431111\_at 1.17164 "enolase 1, alpha non-neuron /// similar to enolase 1, alpha non-neuron ///  
similar to enolase 1, alpha non-neuron /// similar to T21B10.2b /// similar to enolase 1, alpha non-  
neuron" Eno1 /// LOC238943 /// LOC433182 /// LOC671462 /// LOC674877  
1431112\_at 1.02239 unc-51-like kinase 3 (C. elegans) Ulk3  
1431113\_at 1.48553 RNA binding motif protein 4B Rbm4b  
1431114\_at 1.06514 dedicator of cytokinesis 4 Dock4  
1431115\_at 1.13345 TGFB-induced factor 2 Tgif2  
1431116\_at 1.01653 RIKEN cDNA C030003D03 gene C030003D03Rik  
1431117\_x\_at 1.06389 RIKEN cDNA 1810029B16 gene /// hypothetical LOC383495 /// hypothetical  
protein LOC675103 1810029B16Rik /// LOC383495 /// LOC675103  
1431118\_at 1.59625 RIKEN cDNA 6720427H10 gene 6720427H10Rik  
1431119\_at 1.15969 "DnaJ (Hsp40) related, subfamily B, member 13" Dnajb13  
1431120\_a\_at 1.24860 "golgi autoantigen, golgin subfamily a, 1" Golga1  
1431121\_at 1.00642 angiomotin-like 1 Amotl1  
1431122\_at 0.86167 armadillo repeat containing 9 Armc9



1431123\_s\_at 1.09923 "DnaJ (Hsp40) homolog, subfamily C, member 8 /// similar to DnaJ (Hsp40) homolog, subfamily C, member 8 (predicted)" Dnajc8 /// LOC669266  
 1431124\_at 1.01544 AU RNA binding protein/enoyl-coenzyme A hydratase Auh  
 1431125\_a\_at 0.93772 threonyl-tRNA synthetase-like 1 Tarsl1  
 1431126\_a\_at 1.07047 RIKEN cDNA 0610011F06 gene 0610011F06Rik  
 1431127\_at 0.93411 zinc finger protein 297B Zfp297b  
 1431128\_at 0.96866 "DNA segment, Chr 8, Brigham & Women's Genetics 1414 expressed" D8Bwg1414e  
 1431129\_at 0.94811 ubiquitin specific peptidase 31 Usp31  
 1431130\_at 1.01869 RIKEN cDNA 2010110P09 gene 2010110P09Rik  
 1431131\_s\_at 1.00043 RIKEN cDNA A630007B06 gene /// similar to oocyte-testis gene 1 A630007B06Rik /// LOC671029  
 1431132\_x\_at 1.09501 RIKEN cDNA 0610007P22 gene 0610007P22Rik  
 1431133\_at 1.05353 Rho GTPase activating protein 18 Arhgap18  
 1431134\_at 1.17268 "inhibitor of growth family, member 5" Ing5  
 1431135\_at 0.96763 --- ---  
 1431136\_at 0.90241 "RAB36, member RAS oncogene family" Rab36  
 1431137\_at 1.06541 RUN and SH3 domain containing 1 Ruscl  
 1431138\_at 0.88630 armadillo repeat containing 9 Armc9  
 1431139\_at 1.02395 "chromodomain protein, Y chromosome-like 2" Cdy12  
 1431140\_at 1.01711 thioesterase superfamily member 4 Them4  
 1431141\_at 0.97795 RIKEN cDNA 2610507I01 gene 2610507I01Rik  
 1431142\_s\_at 0.98044 apoptosis-inducing factor (AIF)-like mitochondrion-associated inducer of death Amid  
 1431143\_x\_at 0.97009 apoptosis-inducing factor (AIF)-like mitochondrion-associated inducer of death Amid  
 1431144\_at 1.10707 RIKEN cDNA 2810002G02 gene /// region containing RIKEN cDNA 2810002G02 gene; tuftelin interacting protein 11 2810002G02Rik /// LOC671202  
 1431145\_a\_at 0.99187 CUE domain containing 2 Cuedc2  
 1431146\_a\_at 0.83409 copine VIII Cpne8  
 1431147\_at 1.14911 RAD50 interactor 1 Rint1  
 1431148\_at 0.81112 --- ---  
 1431149\_at 0.86933 RIKEN cDNA B430105A11 gene B430105A11Rik  
 1431150\_at 0.85821 RIKEN cDNA 1700110M21 gene 1700110M21Rik  
 1431151\_at 0.92491 "similar to Gastric triacylglycerol lipase precursor (Gastric lipase) (GL) /// similar to Gastric triacylglycerol lipase precursor (Gastric lipase) (GL) /// similar to Gastric triacylglycerol lipase precursor (Gastric lipase) (GL) /// similar to lipase, gastric /// similar to Gastric triacylglycerol lipase precursor (Gastric lipase) (GL)" LOC628236 /// LOC668099 /// LOC668114 /// LOC673023 /// LOC676650  
 1431152\_at 1.09590 hyaluronan and proteoglycan link protein 3 Hapln3  
 1431153\_at 0.87434 Neurexin III Nrxn3  
 1431154\_at 1.00121 zinc and ring finger 2 Znrf2  
 1431155\_at 1.01755 calmodulin regulated spectrin-associated protein 1-like 1 Camsap111

1431156\_at 1.05922 RIKEN cDNA 9430040K09 gene 9430040K09Rik  
1431157\_at 1.02492 RIKEN cDNA 1700025I17 gene 1700025I17Rik  
1431158\_at 2.07253 RIKEN cDNA 8430406H22 gene 8430406H22Rik  
1431159\_at 1.07046 RIKEN cDNA 2900006F19 gene 2900006F19Rik  
1431160\_x\_at 0.95651 similar to gonadotropin inducible ovarian transcription factor 1 /// similar to Hippocalcin-like protein 1 (Visinin-like protein 3) (VILIP-3) (Neural visinin-like protein 3) (NVL-3) (NVP-3) LOC628850 /// LOC628882  
1431161\_at 1.02928 Rho-guanine nucleotide exchange factor Rgnef  
1431162\_a\_at 1.11060 enabled homolog (Drosophila) Enah  
1431163\_at 1.01749 RIKEN cDNA 2700046G09 gene 2700046G09Rik  
1431164\_at 0.94548 Ras-related GTP binding D Rragd  
1431165\_at 1.05877 RIKEN cDNA A030009A09 gene A030009A09Rik  
1431166\_at 1.02073 --- ---  
1431167\_at 1.01134 "diacylglycerol kinase, gamma" Dgkg  
1431168\_at 0.96418 Six3 opposite strand transcript 1 Six3os1  
1431169\_at 1.00685 RIKEN cDNA D230012E17 gene D230012E17Rik  
1431170\_at 1.04623 ephrin A3 Efna3  
1431171\_at 1.02168 RIKEN cDNA D730001G18 gene D730001G18Rik  
1431172\_at 0.92029 "origin recognition complex, subunit 4-like (S. cerevisiae)" Orc4l  
1431173\_at 1.01340 RIKEN cDNA A930008G19 gene A930008G19Rik  
1431174\_at 1.02386 RIKEN cDNA A930036K24 gene A930036K24Rik  
1431175\_at 0.91655 RIKEN cDNA 1810019D21 gene 1810019D21Rik  
1431176\_at 0.91938 RIKEN cDNA 2310010I16 gene 2310010I16Rik  
1431177\_a\_at 1.06828 ribosomal protein L10A Rpl10a  
1431178\_at 0.74335 similar to murine ULBP-like transcript 1 LOC640488  
1431179\_at 1.00267 ectonucleoside triphosphate diphosphohydrolase 7 Entpd7  
1431180\_at 0.97604 RIKEN cDNA 1700123A16 gene /// similar to zinc finger protein 709 1700123A16Rik /// LOC666461  
1431181\_a\_at 1.00091 Luc7 homolog (S. cerevisiae)-like Luc7l  
1431182\_at 1.11360 heat shock protein 8 /// similar to heat shock protein 8 /// similar to heat shock protein 8 /// similar to heat shock protein 8 /// heat shock protein 8 pseudogene /// heat shock protein 8 pseudogene /// similar to heat shock protein 8 /// similar to heat shock protein 8 /// Hspa8 /// LOC621284 /// LOC624853 /// LOC632214 /// LOC641192 /// LOC666508 /// LOC666904 /// LOC669493 /// LOC671270 /// LOC675417  
1431183\_at 0.96370 RIKEN cDNA 1700066M21 gene 1700066M21Rik  
1431184\_a\_at 1.02782 RIKEN cDNA 4930503B20 gene 4930503B20Rik  
1431185\_at 0.96572 RIKEN cDNA 4930503B20 gene 4930503B20Rik  
1431186\_at 1.03382 "discs, large homolog 5 (Drosophila)" Dlg5  
1431187\_s\_at 1.18849 "discs, large homolog 5 (Drosophila)" Dlg5  
1431188\_a\_at 1.01392 target of myb1 homolog (chicken) /// similar to TOM1 Tom1 /// LOC545878  
1431189\_a\_at 0.85651 fumarylacetoacetate hydrolase domain containing 2A Fahd2a  
1431190\_x\_at 0.94787 fumarylacetoacetate hydrolase domain containing 2A Fahd2a

1431191\_a\_at 0.99839 synaptotagmin I Syt1  
1431192\_at 1.06167 RIKEN cDNA 2010203O03 gene 2010203O03Rik  
1431193\_at 0.94056 "TAF4B RNA polymerase II, TATA box binding protein (TBP)-associated factor" Taf4b  
1431194\_at 1.00292 RIKEN cDNA 6030468B19 gene 6030468B19Rik  
1431195\_at 1.07078 ring finger protein 170 Rnf170  
1431196\_at 0.97663 "ATPase, Ca<sup>++</sup>-sequestering" Atp2c1  
1431197\_at 0.89534 ADP-ribosylation factor-like 6 interacting protein 2 Arl6ip2  
1431198\_x\_at 1.29130 RIKEN cDNA 9430038I01 gene 9430038I01Rik  
1431199\_at 0.87969 RIKEN cDNA 0610031G08 gene 0610031G08Rik  
1431200\_a\_at 0.96235 "zinc finger, CSL domain containing 2" Zcsl2  
1431201\_at 0.95524 "solute carrier family 25, member 27" Slc25a27  
1431202\_at 1.02265 hect domain and RLD 3 Herc3  
1431203\_at 0.96624 serologically defined colon cancer antigen 8 Sdccag8  
1431204\_at 0.78367 RIKEN cDNA 4930578N16 gene 4930578N16Rik  
1431205\_at 0.94693 "Solute carrier family 9 (sodium/hydrogen exchanger), member 8" Slc9a8  
1431206\_at 0.81043 RIKEN cDNA 5730601F06 gene 5730601F06Rik  
1431207\_at 1.04137 RIKEN cDNA 2900024O10 gene 2900024O10Rik  
1431208\_a\_at 0.86089 "solute carrier family 9 (sodium/hydrogen exchanger), isoform 3 regulator 2" Slc9a3r2  
1431209\_s\_at 1.02721 transmembrane protein 42 Tmem42  
1431210\_at 1.03007 ATP/GTP binding protein-like 3 Agbl3  
1431211\_s\_at 0.97356 thioesterase superfamily member 5 Them5  
1431212\_a\_at 1.04753 RIKEN cDNA 3300001M20 gene 3300001M20Rik  
1431213\_a\_at 1.31174 RIKEN cDNA 1300007C21 gene /// similar to RIKEN cDNA 1300007C21 gene /// similar to NADH-ubiquinone oxidoreductase MWFE subunit (Complex I-MWFE) (CI-MWFE) /// hypothetical protein LOC670993 /// hypothetical protein LOC673100 1300007C21Rik /// LOC668462 /// LOC668581 /// LOC670993 /// LOC673100  
1431214\_at 0.99084 RIKEN cDNA 1300007C21 gene 1300007C21Rik  
1431215\_at 0.97025 "DnaJ (Hsp40) homolog, subfamily C, member 6" Dnajc6  
1431216\_s\_at 1.04651 "DnaJ (Hsp40) homolog, subfamily C, member 6" Dnajc6  
1431217\_at 1.22789 leucine rich repeat containing 27 Lrrc27  
1431218\_at 1.35006 "zinc finger, DHHC domain containing 20" Zdhhc20  
1431219\_at 1.29789 "beta-1,3-glucuronyltransferase 3 (glucuronosyltransferase I)" B3gat3  
1431220\_at 0.70539 RIKEN cDNA 2810416G20 gene 2810416G20Rik  
1431221\_at 1.07004 RIKEN cDNA 5830405M20 gene 5830405M20Rik  
1431222\_at 0.98826 T-cell lymphoma invasion and metastasis 2 Tiam2  
1431223\_at 0.95282 RIKEN cDNA 2700054A10 gene 2700054A10Rik  
1431224\_at 0.92874 ubiquitin protein ligase E3A Ube3a  
1431225\_at 0.71521 SRY-box containing gene 11 Sox11  
1431226\_a\_at 0.85481 fibronectin type III domain containing 4 Fndc4  
1431227\_at 1.05733 RIKEN cDNA 2310040A13 gene 2310040A13Rik  
1431228\_s\_at 1.06466 RIKEN cDNA 4930526I15 gene 4930526I15Rik

1431229\_at 0.95728 imprinted gene in the Prader-Willi syndrome region Ipw  
1431230\_a\_at 0.98345 BTB (POZ) domain containing 9 Btbd9  
1431231\_at 1.22423 "histone 2, H3c1 /// histone 1, H3f /// histone1, H3d /// histone 1, H3b /// histone 1, H3e /// histone 2, H3b" Hist2h3c1 /// Hist1h3f /// Hist1h3d /// Hist1h3b /// Hist1h3e /// Hist2h3b  
1431232\_a\_at 1.23365 MAX gene associated Mga  
1431233\_at 0.72642 cyclin M4 Cnm4  
1431234\_at 1.00503 RIKEN cDNA 1700041B20 gene 1700041B20Rik  
1431235\_at 1.88541 --- ---  
1431236\_at 0.87220 serine/threonine kinase 32B Stk32b  
1431237\_at 0.97260 "nuclear receptor subfamily 2, group F, member 2" Nr2f2  
1431238\_at 0.92174 PQ loop repeat containing 1 Pqlc1  
1431239\_at 1.51523 "non-POU-domain-containing, octamer binding protein" Nono  
1431240\_at 1.03397 "C-type lectin domain family 2, member h" Clec2h  
1431241\_at 1.14786 coiled-coil-helix-coiled-coil-helix domain containing 3 Chchd3  
1431242\_at 0.94582 RIKEN cDNA 6330575P09 gene 6330575P09Rik  
1431243\_at 0.97704 RIKEN cDNA 1700120J03 gene 1700120J03Rik  
1431244\_s\_at 0.84890 dynamin binding protein Dnmbp  
1431245\_at 0.80474 RIKEN cDNA 1700063H04 gene 1700063H04Rik  
1431246\_at 0.96434 IQ motif containing E Iqce  
1431247\_at 1.02132 RIKEN cDNA 1300014J16 gene 1300014J16Rik  
1431248\_at 2.34493 RIKEN cDNA 5031426D15 gene 5031426D15Rik  
1431249\_at 1.02508 --- ---  
1431250\_at 0.95178 RIKEN cDNA 9030624G23 gene /// similar to development- and differentiation-  
enhancing factor 2 /// similar to Hippocalcin-like protein 1 (Visinin-like protein 3) (VILIP-3) (Neural  
visinin-like protein 3) (NVL-3) (NVP-3) /// similar to development- and differentiation-enhancing factor  
2 /// similar to development- and differentiation-enhancing factor 2 /// similar to gonadotropin inducible  
ovarian transcription factor 1 /// similar to development- and differentiation-enhancing factor 2 ///  
similar to development- and differentiation-enhancing factor 2 /// similar to development- and  
differentiation-enhancing factor 2 /// hypothetical protein LOC673340 9030624G23Rik ///  
LOC272713 /// LOC544848 /// LOC623886 /// LOC668643 /// LOC668669 /// LOC671762 ///  
LOC673231 /// LOC673232 /// LOC673340  
1431251\_at 0.99365 RIKEN cDNA 1300011L04 gene 1300011L04Rik  
1431252\_a\_at 0.87671 zinc finger protein 655 Zfp655  
1431253\_s\_at 0.82254 "TBC1 domain family, member 9" Tbc1d9  
1431254\_at 0.96170 kelch repeat and BTB (POZ) domain containing 11 /// similar to Protein  
KIAA0711 Kbtbd11 /// LOC632344  
1431255\_at 1.13878 calreticulin 3 Calr3  
1431256\_at 1.33634 RIKEN cDNA 5033423O07 gene 5033423O07Rik  
1431257\_at 0.91475 RIKEN cDNA 6230409E13 gene 6230409E13Rik  
1431258\_at 1.07743 death inducer-obliterator 1 Dido1  
1431259\_at 0.81546 --- ---  
1431260\_at 1.02270 RIKEN cDNA 4833417C18 gene 4833417C18Rik  
1431261\_at 0.91002 chloride intracellular channel 5 Clic5

1431262\_at 1.00949 hypothetical protein LOC544988 /// similar to Spetex-2H protein /// similar to Spetex-2H protein /// hypothetical protein LOC666772 LOC544988 /// LOC622931 /// LOC666442 /// LOC666772

1431263\_at 0.97388 "protein kinase, AMP-activated, gamma 2 non-catalytic subunit" Prkag2

1431264\_at 1.03431 --- ---

1431265\_at 0.97884 zinc finger protein 28 Zfp28

1431266\_at 1.04014 RIKEN cDNA 5830433G22 gene 5830433G22Rik

1431267\_at 1.01069 RIKEN cDNA 5430425J12 gene 5430425J12Rik

1431268\_at 1.09947 RIKEN cDNA 1700047I17 gene 1700047I17Rik

1431269\_at 1.17710 peroxiredoxin 4 Prdx4

1431270\_a\_at 0.90748 asteroid homolog 1 (Drosophila) Aste1

1431271\_at 0.98489 RIKEN cDNA 2810428J06 gene 2810428J06Rik

1431272\_at 0.96160 RIKEN cDNA 5430405H02 gene 5430405H02Rik

1431273\_at 1.10387 RIKEN cDNA 2810417H13 gene 2810417H13Rik

1431274\_a\_at 1.03976 --- ---

1431275\_at 0.93334 "chromatin assembly factor 1, subunit B (p60)" Chaf1b

1431276\_at 0.91103 RIKEN cDNA 9130019P16 gene 9130019P16Rik

1431277\_at 0.93299 --- ---

1431278\_s\_at 0.91123 "phospholipase A2, group VI" Pla2g6

1431279\_s\_at 1.07332 tubulin tyrosine ligase like family 5 Ttl15

1431280\_at 1.18463 expressed sequence AI597468 AI597468

1431281\_at 1.00798 dysferlin interacting protein 1 Dysfip1

1431282\_at 0.99592 thyroid hormone receptor associated protein 4 Thrap4

1431283\_at 0.86220 --- ---

1431284\_a\_at 1.05104 RIKEN cDNA 2210013K02 gene 2210013K02Rik

1431285\_at 0.89416 "mahogunin, ring finger 1" Mgrn1

1431286\_at 1.02009 --- ---

1431287\_at 1.13847 pericentriolar material 1 Pcm1

1431288\_at 1.02755 carbonic anhydrase 10 Car10

1431289\_at 0.97033 tetraspanin 32 Tspan32

1431290\_at 1.03160 RIKEN cDNA 4930588J15 gene 4930588J15Rik

1431291\_at 1.07861 RIKEN cDNA 2700071J12 gene 2700071J12Rik

1431292\_a\_at 1.00240 protein tyrosine kinase 9-like (A6-related protein) Ptk9l

1431293\_a\_at 0.90326 claudin domain containing 1 Cldnd1

1431294\_at 0.95714 "spermatogenesis associated glutamate (E)-rich protein 8, pseudogene 1 /// spermatogenesis associated glutamate (E)-rich protein 7, pseudogene 1" Speer8-ps1 /// Speer7-ps1

1431295\_a\_at 0.96088 syntaxin 18 Stx18

1431296\_at 0.96704 G protein-coupled receptor 15 Gpr15

1431297\_a\_at 1.03200 RIKEN cDNA 4933436C20 gene 4933436C20Rik

1431298\_at 1.18895 RIKEN cDNA 5930416I19 gene 5930416I19Rik

1431299\_a\_at 0.94268 RIKEN cDNA 2310014H01 gene 2310014H01Rik

1431300\_at 0.94545 SH3-domain GRB2-like (endophilin) interacting protein 1 Sgip1

1431301\_at 1.07959 RIKEN cDNA E130201N16 gene E130201N16Rik

1431302\_a\_at 1.05800 nudix (nucleoside diphosphate linked moiety X)-type motif 7 Nudt7  
1431303\_at 1.12408 serine/threonine kinase 38 Stk38  
1431304\_a\_at 0.97491 RIKEN cDNA 1300007B12 gene 1300007B12Rik  
1431305\_at 0.99892 mucolipin 1 Mcoln1  
1431306\_at 0.99442 "5'-nucleotidase, cytosolic III" Nt5c3  
1431307\_at 1.08234 RIKEN cDNA 4930589M24 gene 4930589M24Rik  
1431308\_at 0.95601 RIKEN cDNA 5730557B15 gene 5730557B15Rik  
1431309\_at 0.99873 "tubulin tyrosine ligase-like family, member 10" Ttl10  
1431310\_s\_at 0.95714 "tubulin tyrosine ligase-like family, member 10" Ttl10  
1431311\_at 1.02124 RIKEN cDNA 4430401P03 gene 4430401P03Rik  
1431312\_at 0.87810 RIKEN cDNA 5730577I03 gene 5730577I03Rik  
1431313\_at 0.92016 RIKEN cDNA 5730442P18 gene 5730442P18Rik  
1431314\_a\_at 1.03729 RIKEN cDNA 5830417I10 gene 5830417I10Rik  
1431315\_at 1.02980 hydrolethalus syndrome 1 Hyls1  
1431316\_at 1.41922 itchy Itch  
1431317\_at 1.13660 RIKEN cDNA 2410018L13 gene 2410018L13Rik  
1431318\_at 0.97529 RIKEN cDNA 4833420G17 gene 4833420G17Rik  
1431319\_at 0.86420 unc-51-like kinase 4 (C. elegans) Ulk4  
1431320\_a\_at 1.12677 myosin Va Myo5a  
1431321\_at 0.99348 RIKEN cDNA 4930513E20 gene 4930513E20Rik  
1431322\_at 0.91000 "immunoglobulin superfamily, member 3" Igsf3  
1431323\_at 0.98542 leucine zipper transcription factor-like 1 Lztf1  
1431324\_at 0.97775 "extracellular matrix protein 2, female organ and adipocyte specific" Ecm2  
1431325\_at 0.95319 camello-like 3 Cml3  
1431326\_a\_at 1.01307 tropomodulin 2 Tmod2  
1431327\_at 1.18128 vacuolar protein sorting 13A (yeast) Vps13a  
1431328\_at 0.87135 "protein phosphatase 1, catalytic subunit, beta isoform" Ppp1cb  
1431329\_at 0.96581 nephronophthisis 4 (juvenile) homolog (human) Nphp4  
1431330\_at 0.93763 RIKEN cDNA 3110002H16 gene 3110002H16Rik  
1431331\_at 0.91102 monoglyceride lipase Mgl  
1431332\_a\_at 1.09468 telomeric repeat binding factor 1 Terf1  
1431333\_at 0.98670 "histone 1, H4h" Hist1h4h  
1431334\_a\_at 1.03737 RIKEN cDNA 4933433P14 gene 4933433P14Rik  
1431335\_a\_at 0.59213 WAP four-disulfide core domain 1 Wfdc1  
1431336\_at 0.99317 "scavenger receptor class A, member 5 (putative)" Scara5  
1431337\_a\_at 0.95773 RIKEN cDNA 1810055E12 gene 1810055E12Rik  
1431338\_at 0.97290 CASK interacting protein 1 Caskin1  
1431339\_a\_at 1.04014 EF hand domain containing 2 Efhd2  
1431340\_a\_at 1.12744 RIKEN cDNA 2310002J21 gene 2310002J21Rik  
1431341\_at 0.88065 "Protein phosphatase 2 (formerly 2A), catalytic subunit, beta isoform" Ppp2cb  
1431342\_at 0.91429 --- ---  
1431343\_at 1.04628 --- ---  
1431344\_at 0.93311 "G protein-coupled receptor, family C, group 1, member B" Grm2

|              |         |                                                                         |               |
|--------------|---------|-------------------------------------------------------------------------|---------------|
| 1431345_a_at | 0.90781 | "TATA box binding protein (Tbp)-associated factor, RNA polymerase I, B" |               |
| Taf1b        |         |                                                                         |               |
| 1431346_at   | 0.85471 | RIKEN cDNA 6330405D24 gene                                              | 6330405D24Rik |
| 1431347_at   | 1.09523 | RIKEN cDNA 5730407M17 gene                                              | 5730407M17Rik |
| 1431348_at   | 0.99783 | "peptidylprolyl isomerase F, opposite strand transcription unit"        | Ppifos        |
| 1431349_at   | 1.06605 | heterogeneous nuclear ribonucleoprotein A/B                             | Hnrpab        |
| 1431350_at   | 0.93980 | RIKEN cDNA C130036L24 gene                                              | C130036L24Rik |
| 1431351_at   | 1.13279 | plasmacytoma variant translocation 1                                    | Pvt1          |
| 1431352_s_at | 1.30902 | plasmacytoma variant translocation 1                                    | Pvt1          |
| 1431353_at   | 1.12882 | RIKEN cDNA C330050A14 gene                                              | C330050A14Rik |
| 1431354_a_at | 0.95912 | phenylalanine-tRNA synthetase 2 (mitochondrial)                         | Fars2         |
| 1431355_s_at | 2.23628 | "transient receptor potential cation channel, subfamily M, member 7"    | Trpm7         |
| 1431356_at   | 1.07972 | RIKEN cDNA 6430710C18 gene                                              | 6430710C18Rik |
| 1431357_a_at | 0.93565 | retinitis pigmentosa GTPase regulator interacting protein 1             | Rpgrip1       |
| 1431358_at   | 1.00816 | RIKEN cDNA 4930547N16 gene                                              | 4930547N16Rik |
| 1431359_a_at | 1.10057 | RIKEN cDNA 1110007C09 gene                                              | 1110007C09Rik |
| 1431360_s_at | 1.05634 | DMRT-like family C1a                                                    | Dmrta1a       |
| 1431361_at   | 0.97038 | prolylcarboxypeptidase (angiotensinase C)                               | Prpc          |
| 1431362_a_at | 1.02599 | SPARC related modular calcium binding 2                                 | Smoc2         |
| 1431363_at   | 0.90595 | RIKEN cDNA 4933425K02 gene                                              | 4933425K02Rik |
| 1431364_a_at | 1.09090 | RIKEN cDNA 2810047C21 gene                                              | 2810047C21Rik |
| 1431365_at   | 0.94198 | ring finger protein 32                                                  | Rnf32         |
| 1431366_at   | 0.95865 | RIKEN cDNA 4930519G04 gene                                              | 4930519G04Rik |
| 1431367_at   | 0.92905 | membrane-associated ring finger (C3HC4) 1                               | 1-Mar         |
| 1431368_at   | 1.03906 | RIKEN cDNA 4930404N11 gene                                              | 4930404N11Rik |
| 1431369_at   | 1.03242 | development and differentiation enhancing factor 2                      | Ddef2         |
| 1431370_at   | 1.04436 | RIKEN cDNA 4930512B01 gene                                              | 4930512B01Rik |
| 1431371_at   | 1.00654 | RIKEN cDNA 9030411M13 gene                                              | 9030411M13Rik |
| 1431372_at   | 1.31418 | serine/arginine-rich protein specific kinase 2                          | Srpk2         |
| 1431373_at   | 0.97381 | "processing of precursor 5, ribonuclease P/MRP family (S. cerevisiae)"  | Pop5          |
| 1431374_at   | 1.22722 | RIKEN cDNA 6330407A03 gene                                              | 6330407A03Rik |
| 1431375_s_at | 0.98430 | "parvin, alpha"                                                         | Parva         |
| 1431376_at   | 1.19334 | WD repeat domain 62                                                     | Wdr62         |
| 1431377_at   | 1.31239 | ataxin 10                                                               | Atxn10        |
| 1431378_at   | 0.95332 | ---                                                                     | ---           |
| 1431379_a_at | 1.00979 | "solute carrier family 13 (sodium/sulphate symporters), member 1"       | Slc13a1       |
| 1431380_at   | 1.06279 | RIKEN cDNA 5730409L17 gene                                              | 5730409L17Rik |
| 1431381_at   | 0.95335 | RIKEN cDNA 3110005L24 gene                                              | 3110005L24Rik |
| 1431382_a_at | 0.98072 | restin-like 2                                                           | Rsnl2         |
| 1431383_at   | 0.97047 | RIKEN cDNA 1110028F11 gene                                              | 1110028F11Rik |
| 1431384_at   | 1.03093 | RIKEN cDNA 1700095G12 gene                                              | 1700095G12Rik |
| 1431385_a_at | 0.79905 | "membrane-bound transcription factor peptidase, site 1"                 | Mbtps1        |
| 1431386_s_at | 0.99713 | "membrane-bound transcription factor peptidase, site 1"                 | Mbtps1        |

1431387\_at 0.96161 Annexin A11 Anxa11  
1431388\_at 1.11740 M-phase phosphoprotein 10 (U3 small nucleolar ribonucleoprotein)  
Mphosph10  
1431389\_at 0.92348 TBK1 binding protein 1 Tbkbp1  
1431390\_a\_at 0.83109 "glutamate receptor, ionotropic, N-methyl D-aspartate-like 1A" Grin1a  
1431391\_at 1.41934 Ral GEF with PH domain and SH3 binding motif 1 Ralgps1  
1431392\_at 1.00118 homeo box A3 /// RIKEN cDNA 5730596B20 gene Hoxa3 ///  
5730596B20Rik  
1431393\_at 1.08665 Six6 opposite strand transcript 1 Six6os1  
1431394\_a\_at 0.83164 leucine-rich repeat kinase 2 Lrrk2  
1431395\_a\_at 1.09563 IQ motif containing GTPase activating protein 1 Iqgap1  
1431396\_at 1.13366 IQ motif containing GTPase activating protein 1 Iqgap1  
1431397\_at 0.98771 --- ---  
1431398\_at 0.89754 RIKEN cDNA 5730446D14 gene 5730446D14Rik  
1431399\_at 1.19663 "a disintegrin-like and metallopeptidase (reprolysin type) with thrombospondin  
type 1 motif, 9" Adamts9  
1431400\_a\_at 0.92850 growth arrest specific 7 Gas7  
1431401\_at 1.17314 RIKEN cDNA 4930539J05 gene 4930539J05Rik  
1431402\_at 1.14723 kin of IRRE like 3 (Drosophila) Kirrel3  
1431403\_a\_at 0.93607 RIKEN cDNA 2900002G04 gene 2900002G04Rik  
1431404\_at 0.90845 transmembrane protein 56 Tmem56  
1431405\_a\_at 1.41338 RIKEN cDNA 4930413O22 gene 4930413O22Rik  
1431406\_at 0.94288 alanine-glyoxylate aminotransferase 2-like 1 Agxt2l1  
1431407\_at 1.00639 RIKEN cDNA 2310024H09 gene 2310024H09Rik  
1431408\_at 0.98651 RIKEN cDNA 4930412B13 gene 4930412B13Rik  
1431409\_at 0.89686 RIKEN cDNA C030015A19 gene C030015A19Rik  
1431410\_at 0.96609 "DNA segment, Chr 16, ERATO Doi 472, expressed" D16Ertd472e  
1431411\_a\_at 0.99754 retinoic acid induced 12 Rai12  
1431412\_at 1.14409 RIKEN cDNA 2810455B08 gene 2810455B08Rik  
1431413\_at 1.05526 RIKEN cDNA 9130218E19 gene 9130218E19Rik  
1431414\_at 1.03451 RIKEN cDNA 2610312K03 gene 2610312K03Rik  
1431415\_a\_at 1.08907 TATA box binding protein-like 1 Tbp1l  
1431416\_a\_at 0.97366 junction adhesion molecule 2 Jam2  
1431417\_at 1.07211 junction adhesion molecule 2 Jam2  
1431418\_at 0.93853 RIKEN cDNA C030026M15 gene C030026M15Rik  
1431419\_at 1.01166 RIKEN cDNA 2610524G07 gene 2610524G07Rik  
1431420\_s\_at 1.09525 RIKEN cDNA 2610524G07 gene 2610524G07Rik  
1431421\_x\_at 1.05096 RIKEN cDNA 2610524G07 gene 2610524G07Rik  
1431422\_a\_at 1.16724 dual specificity phosphatase 14 Dusp14  
1431423\_a\_at 1.10311 "mediator of RNA polymerase II transcription, subunit 8 homolog (yeast)"  
Med8  
1431424\_at 0.89854 RIKEN cDNA 2810055G20 gene 2810055G20Rik  
1431425\_a\_at 0.94665 RIKEN cDNA 4930535B03 gene 4930535B03Rik



|               |         |                                                                   |               |
|---------------|---------|-------------------------------------------------------------------|---------------|
| 1431426_at    | 0.96595 | RIKEN cDNA 4930535B03 gene                                        | 4930535B03Rik |
| 1431427_at    | 1.01963 | RIKEN cDNA 5430427M07 gene                                        | 5430427M07Rik |
| 1431428_a_at  | 1.02943 | nitric oxide synthase interacting protein                         | Nosip         |
| 1431429_a_at  | 0.85464 | ADP-ribosylation factor-like 4A                                   | Arl4a         |
| 1431430_s_at  | 0.83152 | tripartite motif-containing 59 /// similar to mouse RING finger 1 | Trim59 ///    |
| LOC630539     |         |                                                                   |               |
| 1431431_a_at  | 0.96136 | nitrogen fixation gene 1 ( <i>S. cerevisiae</i> )                 | Nfs1          |
| 1431432_at    | 1.21558 | "cofilin 2, muscle"                                               | Cfl2          |
| 1431433_at    | 1.05328 | SET binding factor 2                                              | Sbf2          |
| 1431434_at    | 0.94434 | "serine/threonine kinase 39, STE20/SPS1 homolog (yeast)"          | Stk39         |
| 1431435_at    | 0.95541 | ---                                                               | ---           |
| 1431436_a_at  | 0.72334 | katanin p60 subunit A-like 2                                      | Katnal2       |
| 1431437_at    | 1.02390 | forkhead box P4                                                   | Foxp4         |
| 1431438_at    | 1.07915 | RIKEN cDNA C530001K22 gene                                        | C530001K22Rik |
| 1431439_at    | 1.12078 | RIKEN cDNA 5830487J09 gene                                        | 5830487J09Rik |
| 1431440_at    | 1.09608 | "polymerase (DNA directed), epsilon 2 (p59 subunit)"              | Pole2         |
| 1431441_at    | 0.81701 | RIKEN cDNA 1700106J16 gene                                        | 1700106J16Rik |
| 1431442_at    | 0.91838 | RIKEN cDNA 2310047B19 gene                                        | 2310047B19Rik |
| 1431443_at    | 0.99448 | RIKEN cDNA 1810008B01 gene                                        | 1810008B01Rik |
| 1431444_at    | 0.97893 | "serine protease inhibitor, Kunitz type 4"                        | Spint4        |
| 1431445_at    | 0.95308 | RIKEN cDNA 4921509A18 gene                                        | 4921509A18Rik |
| 1431446_at    | 1.04896 | RIKEN cDNA 0610009B14 gene                                        | 0610009B14Rik |
| 1431447_at    | 0.97258 | RIKEN cDNA 4930432K09 gene                                        | 4930432K09Rik |
| 1431448_at    | 0.97974 | RIKEN cDNA 4930474N09 gene                                        | 4930474N09Rik |
| 1431449_at    | 1.03129 | "solute carrier organic anion transporter family, member 6d1"     | Slco6d1       |
| 1431450_at    | 1.06105 | RIKEN cDNA 4930444P10 gene /// hypothetical protein LOC638108     |               |
| 4930444P10Rik |         | /// LOC638108                                                     |               |
| 1431451_at    | 0.82825 | glycosyltransferase 6 domain containing 1                         | Glt6d1        |
| 1431452_at    | 0.98721 | N-deacetylase/N-sulfotransferase (heparin glucosaminyl) 4         | Ndst4         |
| 1431453_at    | 1.00205 | RIKEN cDNA 4933406K04 gene                                        | 4933406K04Rik |
| 1431454_at    | 1.03560 | RIKEN cDNA 4930523O13 gene                                        | 4930523O13Rik |
| 1431455_at    | 1.02444 | RIKEN cDNA 4933401B01 gene                                        | 4933401B01Rik |
| 1431456_at    | 0.96645 | RIKEN cDNA 4931439C15 gene                                        | 4931439C15Rik |
| 1431457_at    | 0.97955 | RIKEN cDNA 7420700N18 gene                                        | 7420700N18Rik |
| 1431458_at    | 0.93645 | RIKEN cDNA 4921507L20 gene                                        | 4921507L20Rik |
| 1431459_at    | 1.00165 | RIKEN cDNA 9430013L14 gene                                        | 9430013L14Rik |
| 1431460_at    | 0.90354 | RIKEN cDNA 4930519D14 gene                                        | 4930519D14Rik |
| 1431461_at    | 1.05748 | RIKEN cDNA 4933417E11 gene                                        | 4933417E11Rik |
| 1431462_at    | 0.94765 | "protein phosphatase 1, regulatory (inhibitor) subunit 12B"       | Ppp1r12b      |
| 1431463_at    | 1.00347 | RIKEN cDNA 1700041C02 gene                                        | 1700041C02Rik |
| 1431464_a_at  | 1.03094 | phosphomannomutase 2                                              | Pmm2          |
| 1431465_s_at  | 1.02717 | forty-two-three domain containing 1                               | Fytd1         |
| 1431466_at    | 1.06664 | RIKEN cDNA 4930553D19 gene                                        | 4930553D19Rik |

|              |         |                                                                                                                                                                                                                                                                          |               |
|--------------|---------|--------------------------------------------------------------------------------------------------------------------------------------------------------------------------------------------------------------------------------------------------------------------------|---------------|
| 1431467_at   | 0.96287 | RIKEN cDNA 4931402G19 gene                                                                                                                                                                                                                                               | 4931402G19Rik |
| 1431468_at   | 0.95464 | cysteine-rich secretory protein 4                                                                                                                                                                                                                                        | Crisp4        |
| 1431469_a_at | 0.60163 | CXXC finger 5 Cxxc5                                                                                                                                                                                                                                                      |               |
| 1431470_a_at | 1.11302 | RIKEN cDNA 4933414I15 gene                                                                                                                                                                                                                                               | 4933414I15Rik |
| 1431471_at   | 1.07594 | RIKEN cDNA 4833428M15 gene                                                                                                                                                                                                                                               | 4833428M15Rik |
| 1431472_at   | 1.05085 | RIKEN cDNA 2310043D23 gene                                                                                                                                                                                                                                               | 2310043D23Rik |
| 1431473_at   | 1.13103 | RIKEN cDNA 5330423I11 gene                                                                                                                                                                                                                                               | 5330423I11Rik |
| 1431474_at   | 0.96587 | RIKEN cDNA 4833414L08 gene                                                                                                                                                                                                                                               | 4833414L08Rik |
| 1431475_a_at | 0.91140 | homeo box A10 Hoxa10                                                                                                                                                                                                                                                     |               |
| 1431476_at   | 0.95165 | RIKEN cDNA 4933407I05 gene                                                                                                                                                                                                                                               | 4933407I05Rik |
| 1431477_at   | 0.99865 | RIKEN cDNA 4921515L22 gene                                                                                                                                                                                                                                               | 4921515L22Rik |
| 1431478_at   | 1.01140 | RIKEN cDNA 3110035G12 gene                                                                                                                                                                                                                                               | 3110035G12Rik |
| 1431479_at   | 0.97085 | RIKEN cDNA 4921524L21 gene                                                                                                                                                                                                                                               | 4921524L21Rik |
| 1431480_at   | 1.02914 | RIKEN cDNA 4833419E13 gene                                                                                                                                                                                                                                               | 4833419E13Rik |
| 1431481_at   | 0.98983 | RIKEN cDNA 4930443O20 gene                                                                                                                                                                                                                                               | 4930443O20Rik |
| 1431482_at   | 1.07206 | RIKEN cDNA 2900012M01 gene                                                                                                                                                                                                                                               | 2900012M01Rik |
| 1431483_at   | 1.00207 | RIKEN cDNA 4930544M13 gene                                                                                                                                                                                                                                               | 4930544M13Rik |
| 1431484_at   | 1.03311 | RIKEN cDNA 2010007L08 gene                                                                                                                                                                                                                                               | 2010007L08Rik |
| 1431485_at   | 1.12904 | RIKEN cDNA 4833447I15 gene                                                                                                                                                                                                                                               | 4833447I15Rik |
| 1431486_at   | 0.92892 | RIKEN cDNA 4930503E24 gene                                                                                                                                                                                                                                               | 4930503E24Rik |
| 1431487_at   | 0.99441 | kinesin light chain 2 Klc2                                                                                                                                                                                                                                               |               |
| 1431488_at   | 0.96456 | RIKEN cDNA 4833428L15 gene                                                                                                                                                                                                                                               | 4833428L15Rik |
| 1431489_at   | 0.99270 | RIKEN cDNA 4933432K03 gene                                                                                                                                                                                                                                               | 4933432K03Rik |
| 1431490_at   | 0.92132 | RIKEN cDNA A930033C23 gene                                                                                                                                                                                                                                               | A930033C23Rik |
| 1431491_at   | 1.01854 | RIKEN cDNA 9430087N24 gene                                                                                                                                                                                                                                               | 9430087N24Rik |
| 1431492_at   | 1.02236 | RIKEN cDNA 2210418G03 gene                                                                                                                                                                                                                                               | 2210418G03Rik |
| 1431493_at   | 1.01259 | RIKEN cDNA 9530046B11 gene                                                                                                                                                                                                                                               | 9530046B11Rik |
| 1431494_at   | 1.15373 | RIKEN cDNA A930008B05 gene                                                                                                                                                                                                                                               | A930008B05Rik |
| 1431495_at   | 0.99004 | RIKEN cDNA 6030440G07 gene                                                                                                                                                                                                                                               | 6030440G07Rik |
| 1431496_at   | 1.08784 | RIKEN cDNA B230104F01 gene                                                                                                                                                                                                                                               | B230104F01Rik |
| 1431497_at   | 0.88007 | RIKEN cDNA C330022C24 gene                                                                                                                                                                                                                                               | C330022C24Rik |
| 1431498_at   | 1.03223 | RIKEN cDNA 9530097N15 gene                                                                                                                                                                                                                                               | 9530097N15Rik |
| 1431499_at   | 0.95843 | RIKEN cDNA 4933436F18 gene                                                                                                                                                                                                                                               | 4933436F18Rik |
| 1431500_at   | 0.93558 | RIKEN cDNA 4933406J10 gene                                                                                                                                                                                                                                               | 4933406J10Rik |
| 1431501_at   | 0.97589 | RIKEN cDNA 1700037C18 gene                                                                                                                                                                                                                                               | 1700037C18Rik |
| 1431502_a_at | 1.21255 | exosome component 3 Exosc3                                                                                                                                                                                                                                               |               |
| 1431503_at   | 1.03874 | RIKEN cDNA 4930513O06 gene                                                                                                                                                                                                                                               | 4930513O06Rik |
| 1431504_at   | 1.00385 | RIKEN cDNA 2310061N02 gene                                                                                                                                                                                                                                               | 2310061N02Rik |
| 1431505_at   | 1.05219 | similar to Peptidyl-prolyl cis-trans isomerase H (PPIase H) (Rotamase H) /// similar to Peptidyl-prolyl cis-trans isomerase H (PPIase H) (Rotamase H) /// similar to Peptidyl-prolyl cis-trans isomerase H (PPIase H) (Rotamase H) LOC629952 /// LOC666411 /// LOC671009 |               |
| 1431506_s_at | 1.06499 | peptidyl prolyl isomerase H /// similar to peptidyl prolyl isomerase H /// similar to Peptidyl-prolyl cis-trans isomerase H (PPIase H) (Rotamase H) /// similar to peptidylprolyl isomerase                                                                              |               |

H /// similar to Peptidyl-prolyl cis-trans isomerase H (PPIase H) (Rotamase H) /// similar to peptidylprolyl isomerase H /// similar to Peptidyl-prolyl cis-trans isomerase H (PPIase H) (Rotamase H) /// similar to peptidylprolyl isomerase H Ppih /// LOC433064 /// LOC629952 /// LOC665989 /// LOC666411 /// LOC669441 /// LOC671009 /// LOC676493

1431507\_a\_at 1.01097 synaptojanin 2 binding protein /// RIKEN cDNA 1810020G14 gene Synj2bp /// 1810020G14Rik

1431508\_at 0.93134 RIKEN cDNA 4930423M02 gene 4930423M02Rik

1431509\_at 0.92683 RIKEN cDNA 4933404G15 gene 4933404G15Rik

1431510\_s\_at 0.99689 RIKEN cDNA 2010110K16 gene 2010110K16Rik

1431511\_at 0.93035 RIKEN cDNA 9230110F15 gene 9230110F15Rik

1431512\_at 0.99498 RIKEN cDNA 4933437F24 gene 4933437F24Rik

1431513\_at 0.92495 RIKEN cDNA 4921537P18 gene 4921537P18Rik

1431514\_at 0.65876 RIKEN cDNA 5730453C05 gene 5730453C05Rik

1431515\_at 0.95043 RIKEN cDNA 4932414N04 gene 4932414N04Rik

1431516\_at 0.77235 RIKEN cDNA 4930565N06 gene 4930565N06Rik

1431517\_at 0.90558 RIKEN cDNA 4933417C20 gene 4933417C20Rik

1431518\_at 0.94908 patched domain containing 3 Ptchd3

1431519\_at 0.98007 RIKEN cDNA 4933406L23 gene 4933406L23Rik

1431520\_at 1.02687 RIKEN cDNA 4933406J09 gene 4933406J09Rik

1431521\_at 1.04205 RIKEN cDNA 5033428B15 gene 5033428B15Rik

1431522\_at 0.97773 RIKEN cDNA A930001A20 gene A930001A20Rik

1431523\_at 0.91078 RIKEN cDNA 4930564K09 gene 4930564K09Rik

1431524\_at 0.94850 RIKEN cDNA 4933427I22 gene 4933427I22Rik

1431525\_at 1.10602 RIKEN cDNA 9130002K18 gene 9130002K18Rik

1431526\_at 0.92169 hypothetical protein LOC672430 LOC672430

1431527\_at 0.96510 CD164 antigen Cd164

1431528\_at 1.58326 RIKEN cDNA 5830427D02 gene 5830427D02Rik

1431529\_at 1.09869 RIKEN cDNA A930002H02 gene A930002H02Rik

1431530\_a\_at 0.85549 tetraspanin 5 Tspan5

1431531\_at 0.88556 RIKEN cDNA 1700025D03 gene 1700025D03Rik

1431532\_at 0.97405 RIKEN cDNA 4931400O07 gene 4931400O07Rik

1431533\_at 0.88868 RIKEN cDNA 4921530D09 gene 4921530D09Rik

1431534\_at 0.95036 protein kinase C and casein kinase substrate in neurons 3 Pacsin3

1431535\_at 0.99958 phospholipase B1 Plb1

1431536\_at 1.10426 RIKEN cDNA 4933432K03 gene 4933432K03Rik

1431537\_at 0.86917 RIKEN cDNA 2010001E11 gene 2010001E11Rik

1431538\_at 0.96769 RIKEN cDNA 4931415C17 gene 4931415C17Rik

1431539\_at 0.91577 "SAM domain, SH3 domain and nuclear localization signals, 1" Samsn1

1431540\_at 0.94944 RIKEN cDNA 4930511E03 gene 4930511E03Rik

1431541\_at 0.94616 "STT3, subunit of the oligosaccharyltransferase complex, homolog B (S. cerevisiae)" Stt3b

1431542\_at 0.98081 presenilin 2 Psen2

1431543\_at 0.81193 RIKEN cDNA 9130001E16 gene 9130001E16Rik

|              |         |                                                  |         |               |
|--------------|---------|--------------------------------------------------|---------|---------------|
| 1431544_at   | 1.20823 | RIKEN cDNA 4930524B17                            | gene    | 4930524B17Rik |
| 1431545_at   | 1.11257 | RIKEN cDNA 4921532D01                            | gene    | 4921532D01Rik |
| 1431546_at   | 1.02814 | RIKEN cDNA 4930509K18                            | gene    | 4930509K18Rik |
| 1431547_at   | 1.01781 | RIKEN cDNA 4930435F18                            | gene    | 4930435F18Rik |
| 1431548_at   | 0.98976 | RIKEN cDNA 4933424G05                            | gene    | 4933424G05Rik |
| 1431549_at   | 1.18940 | ---                                              | ---     |               |
| 1431550_at   | 1.04409 | RIKEN cDNA 4930488B22                            | gene    | 4930488B22Rik |
| 1431551_at   | 1.09440 | RIKEN cDNA 2610028D06                            | gene    | 2610028D06Rik |
| 1431552_at   | 0.90680 | RIKEN cDNA 1810006J02                            | gene    | 1810006J02Rik |
| 1431553_at   | 0.91364 | ---                                              | ---     |               |
| 1431554_a_at | 1.18781 | annexin A9                                       | Anxa9   |               |
| 1431555_at   | 0.91852 | RIKEN cDNA 4933409F18                            | gene    | 4933409F18Rik |
| 1431556_at   | 0.97825 | RIKEN cDNA 4930435M08                            | gene    | 4930435M08Rik |
| 1431557_at   | 1.02000 | RIKEN cDNA 4930488N15                            | gene    | 4930488N15Rik |
| 1431558_at   | 1.07164 | RIKEN cDNA 2310016D03                            | gene    | 2310016D03Rik |
| 1431559_at   | 1.06779 | RIKEN cDNA 6430710C18                            | gene    | 6430710C18Rik |
| 1431560_at   | 1.00806 | dephospho-CoA kinase domain containing           | Dcakd   |               |
| 1431561_a_at | 0.93511 | DEAH (Asp-Glu-Ala-His) box polypeptide 34        | Dhx34   |               |
| 1431562_at   | 0.88355 | RIKEN cDNA 4921513I03                            | gene    | 4921513I03Rik |
| 1431563_at   | 1.02374 | RIKEN cDNA 2010003K10                            | gene    | 2010003K10Rik |
| 1431564_at   | 1.06032 | breast cancer anti-estrogen resistance 3         | Bcar3   |               |
| 1431565_at   | 0.96291 | RIKEN cDNA 4930511J24                            | gene    | 4930511J24Rik |
| 1431566_at   | 0.98658 | ---                                              | ---     |               |
| 1431567_at   | 0.98934 | RIKEN cDNA 1700018A04                            | gene    | 1700018A04Rik |
| 1431568_at   | 1.00766 | RIKEN cDNA 4933427E13                            | gene    | 4933427E13Rik |
| 1431569_a_at | 1.07056 | Ly6/Plaur domain containing 1                    | Lypd1   |               |
| 1431570_at   | 1.23410 | RIKEN cDNA 4930588G17                            | gene    | 4930588G17Rik |
| 1431571_at   | 0.97356 | RIKEN cDNA 4933437I04                            | gene    | 4933437I04Rik |
| 1431572_at   | 0.96193 | RIKEN cDNA 2310015K22                            | gene    | 2310015K22Rik |
| 1431573_at   | 0.85593 | spermidine/spermine N1-acetyl transferase-like 1 | Satl1   |               |
| 1431574_at   | 0.80953 | RIKEN cDNA 4930465M20                            | gene    | 4930465M20Rik |
| 1431575_at   | 0.98557 | "C-type lectin domain family 4, member g"        | Clec4g  |               |
| 1431576_at   | 1.01359 | RIKEN cDNA 4933404K08                            | gene    | 4933404K08Rik |
| 1431577_at   | 1.01696 | ---                                              | ---     |               |
| 1431578_at   | 1.00403 | WBP2 N-terminal like                             | Wbp2nl  |               |
| 1431579_at   | 0.81512 | RIKEN cDNA 4933421D24                            | gene    | 4933421D24Rik |
| 1431580_at   | 0.95259 | RIKEN cDNA 4833421K07                            | gene    | 4833421K07Rik |
| 1431581_at   | 1.13416 | RIKEN cDNA 4922502B01                            | gene    | 4922502B01Rik |
| 1431582_at   | 1.17567 | integrin beta 4 binding protein                  | Itgb4bp |               |
| 1431583_at   | 1.05923 | RIKEN cDNA 0610038L08                            | gene    | 0610038L08Rik |
| 1431584_at   | 1.13156 | RIKEN cDNA 1110028F18                            | gene    | 1110028F18Rik |
| 1431585_at   | 1.02095 | RIKEN cDNA 1700034P13                            | gene    | 1700034P13Rik |
| 1431586_at   | 0.92890 | RIKEN cDNA 4921529N20                            | gene    | 4921529N20Rik |

1431587\_at 0.93167 coiled-coil domain containing 7 Ccdc7  
1431588\_at 1.04914 RIKEN cDNA 2900045O20 gene 2900045O20Rik  
1431589\_at 0.98603 hydrocephalus inducing Hydin  
1431590\_at 1.00237 RIKEN cDNA 4930521C21 gene 4930521C21Rik  
1431591\_s\_at 1.61175 hypothetical protein LOC677168 LOC677168  
1431592\_a\_at 0.85860 SH3-domain kinase binding protein 1 Sh3kbp1  
1431593\_a\_at 0.87312 "tRNA splicing endonuclease 34 homolog (SEN34, *S. cerevisiae*)" Tsen34  
1431594\_at 0.93611 dipeptidylpeptidase 3 Dpp3  
1431595\_at 0.99670 RIKEN cDNA 2900064B16 gene 2900064B16Rik  
1431596\_at 1.06601 --- ---  
1431597\_a\_at 0.94488 nuclear receptor interacting protein 3 Nrip3  
1431598\_a\_at 1.11508 LIM homeobox protein 9 Lhx9  
1431599\_at 1.00092 RIKEN cDNA 2310069B03 gene 2310069B03Rik  
1431600\_at 0.97314 RIKEN cDNA 4930564C03 gene 4930564C03Rik  
1431601\_at 0.83852 rhabdoid tumor deletion region gene 1 Rtdr1  
1431602\_a\_at 0.80726 UDP-glucose ceramide glucosyltransferase-like 2 Ugcgl2  
1431603\_at 0.97970 RIKEN cDNA 4931407E12 gene 4931407E12Rik  
1431604\_a\_at 0.95261 coiled-coil domain containing 97 Ccdc97  
1431605\_at 1.02305 RB1-inducible coiled-coil 1 Rb1cc1  
1431606\_a\_at 0.98202 angel homolog 2 (*Drosophila*) Angel2  
1431607\_at 0.98213 lysophospholipase 1 Lypl1  
1431608\_at 1.03745 amyotrophic lateral sclerosis 2 (juvenile) homolog (human) Als2  
1431609\_a\_at 0.84960 "acid phosphatase 5, tartrate resistant" Acp5  
1431610\_at 1.00494 RIKEN cDNA 5330439A09 gene 5330439A09Rik  
1431611\_a\_at 0.84476 "immunoglobulin superfamily, member 4A" Igsf4a  
1431612\_at 1.02887 RIKEN cDNA 1700007J10 gene 1700007J10Rik  
1431613\_a\_at 0.91227 RIKEN cDNA 1700024D23 gene 1700024D23Rik  
1431614\_at 0.93186 RIKEN cDNA 2810049E08 gene 2810049E08Rik  
1431615\_at 0.93024 RIKEN cDNA 4930558J22 gene 4930558J22Rik  
1431616\_at 1.02986 RIKEN cDNA 1700067C01 gene 1700067C01Rik  
1431617\_at 1.09086 RIKEN cDNA 4933405E24 gene 4933405E24Rik  
1431618\_a\_at 0.83586 "DNA segment, Chr 14, ERATO Doi 581, expressed" D14Ertd581e  
1431619\_a\_at 1.10881 dystrobrevin binding protein 1 Dtnbp1  
1431620\_at 0.96691 RIKEN cDNA 4930442J19 gene 4930442J19Rik  
1431621\_at 0.90029 RIKEN cDNA 4930420G21 gene 4930420G21Rik  
1431622\_at 0.97447 RIKEN cDNA 4933406K04 gene 4933406K04Rik  
1431623\_at 1.20376 RIKEN cDNA 1700023H06 gene 1700023H06Rik  
1431624\_a\_at 0.95846 RIKEN cDNA 2610206B13 gene 2610206B13Rik  
1431625\_at 1.23621 "phosphodiesterase 1A, calmodulin-dependent" Pde1a  
1431626\_at 0.96025 RIKEN cDNA 4933429K18 gene 4933429K18Rik  
1431627\_at 0.88331 kinesin family member 27 Kif27  
1431628\_at 1.11498 RIKEN cDNA 4930435H24 gene 4930435H24Rik  
1431629\_at 0.94935 RIKEN cDNA 9130221D24 gene 9130221D24Rik

|              |         |                                                                                   |                    |
|--------------|---------|-----------------------------------------------------------------------------------|--------------------|
| 1431630_a_at | 0.91419 | Kruppel-like factor 3 (basic)                                                     | Klf3               |
| 1431631_at   | 0.90325 | RIKEN cDNA 2900057B20                                                             | gene 2900057B20Rik |
| 1431632_at   | 0.92280 | RIKEN cDNA 4930526L06                                                             | gene 4930526L06Rik |
| 1431633_x_at | 0.96142 | RIKEN cDNA 4930526L06                                                             | gene 4930526L06Rik |
| 1431634_at   | 0.95964 | RIKEN cDNA 4930455C13                                                             | gene 4930455C13Rik |
| 1431635_at   | 1.03263 | RIKEN cDNA 4930412F09                                                             | gene 4930412F09Rik |
| 1431636_at   | 1.07611 | RIKEN cDNA 4930558K02                                                             | gene 4930558K02Rik |
| 1431637_at   | 1.03108 | ---                                                                               | ---                |
| 1431638_at   | 0.97717 | RIKEN cDNA 4930592A05                                                             | gene 4930592A05Rik |
| 1431639_at   | 1.05003 | RIKEN cDNA 4930468A15                                                             | gene 4930468A15Rik |
| 1431640_at   | 0.95326 | RIKEN cDNA 4933431J24                                                             | gene 4933431J24Rik |
| 1431641_at   | 0.90731 | RIKEN cDNA 9330161L09                                                             | gene 9330161L09Rik |
| 1431642_at   | 1.00327 | "eukaryotic translation initiation factor 2, subunit 3, structural gene Y-linked" | Eif2s3y            |
| 1431643_at   | 1.05235 | "spermatogenesis associated glutamate (E)-rich protein 6, pseudogene 1"           | Speer6-ps1         |
| 1431644_a_at | 0.90261 | islet cell autoantigen 1                                                          | Ica1               |
| 1431645_a_at | 0.89563 | guanosine diphosphate (GDP) dissociation inhibitor 2                              | Gdi2               |
| 1431646_a_at | 0.92786 | syntaxin 6                                                                        | Stx6               |
| 1431647_a_at | 1.02119 | CEA-related cell adhesion molecule 13                                             | Ceacam13           |
| 1431648_at   | 1.04851 | RIKEN cDNA 4930528F23                                                             | gene 4930528F23Rik |
| 1431649_at   | 1.00714 | RIKEN cDNA 1700108M19                                                             | gene 1700108M19Rik |
| 1431650_at   | 1.00969 | RIKEN cDNA 1110054P19                                                             | gene 1110054P19Rik |
| 1431651_at   | 0.99422 | RIKEN cDNA C330001K17                                                             | gene C330001K17Rik |
| 1431652_at   | 1.09840 | uridine monophosphate synthetase                                                  | Umps               |
| 1431653_at   | 1.06462 | "T-cell receptor beta, joining region"                                            | Tcrb-J             |
| 1431654_at   | 0.90030 | RIKEN cDNA 1700112M01                                                             | gene 1700112M01Rik |
| 1431655_a_at | 0.91237 | multiple substrate lipid kinase                                                   | Mulk               |
| 1431656_at   | 0.98001 | RIKEN cDNA C630050I24                                                             | gene C630050I24Rik |
| 1431657_at   | 0.87528 | RIKEN cDNA 9230112D13                                                             | gene 9230112D13Rik |
| 1431658_at   | 0.97546 | "histone 1, H4j"                                                                  | Hist1h4j           |
| 1431659_at   | 1.12528 | transmembrane protein 86B                                                         | Tmem86b            |
| 1431660_at   | 0.95966 | RIKEN cDNA 4930564D02                                                             | gene 4930564D02Rik |
| 1431661_at   | 1.05333 | RIKEN cDNA 4930562A09                                                             | gene 4930562A09Rik |
| 1431662_at   | 0.99554 | RIKEN cDNA 4930555F03                                                             | gene 4930555F03Rik |
| 1431663_a_at | 0.93498 | ciliary neurotrophic factor receptor                                              | Cntfr              |
| 1431664_at   | 1.23751 | Luc7 homolog (S. cerevisiae)-like                                                 | Luc7l              |
| 1431665_a_at | 1.08428 | translocase of inner mitochondrial membrane 8 homolog b (yeast)                   | Timm8b             |
| 1431666_at   | 0.99362 | RIKEN cDNA 2610021K21                                                             | gene 2610021K21Rik |
| 1431667_s_at | 1.01287 | RIKEN cDNA 2610021K21                                                             | gene 2610021K21Rik |
| 1431668_at   | 1.02243 | "capping protein (actin filament) muscle Z-line, beta"                            | Capzb              |
| 1431669_at   | 0.86068 | RIKEN cDNA 4930583I09                                                             | gene 4930583I09Rik |
| 1431670_at   | 0.98887 | "NADH dehydrogenase (ubiquinone) 1, subcomplex unknown, 2"                        | Ndufc2             |

|              |         |                                                                        |               |
|--------------|---------|------------------------------------------------------------------------|---------------|
| 1431671_at   | 0.88038 | RIKEN cDNA 4930447A16 gene                                             | 4930447A16Rik |
| 1431672_at   | 0.99657 | RIKEN cDNA 9430069I07 gene                                             | 9430069I07Rik |
| 1431673_at   | 0.99226 | RIKEN cDNA 4930557A04 gene                                             | 4930557A04Rik |
| 1431674_at   | 0.84559 | RIKEN cDNA 2610303G11 gene                                             | 2610303G11Rik |
| 1431675_a_at | 0.80433 | general transcription factor II I                                      | Gtf2i         |
| 1431676_x_at | 0.90755 | general transcription factor II I                                      | Gtf2i         |
| 1431677_at   | 1.31617 | RIKEN cDNA 4631424J17 gene                                             | 4631424J17Rik |
| 1431678_at   | 0.95769 | RIKEN cDNA 4930556N08 gene                                             | 4930556N08Rik |
| 1431679_at   | 0.90934 | RIKEN cDNA 2510042H12 gene                                             | 2510042H12Rik |
| 1431680_a_at | 0.74485 | "protein tyrosine phosphatase, receptor type, K"                       | Ptprk         |
| 1431681_at   | 0.86177 | kallikrein 9                                                           | Klk9          |
| 1431682_at   | 1.00313 | RIKEN cDNA 4930594C11 gene                                             | 4930594C11Rik |
| 1431683_at   | 0.93551 | RIKEN cDNA 4930473H19 gene                                             | 4930473H19Rik |
| 1431684_at   | 1.00478 | RIKEN cDNA 4933402J24 gene                                             | 4933402J24Rik |
| 1431685_at   | 1.03855 | RIKEN cDNA 4930549O18 gene                                             | 4930549O18Rik |
| 1431686_a_at | 1.14706 | "glia maturation factor, beta"                                         | Gmfb          |
| 1431687_at   | 0.97950 | "glia maturation factor, beta"                                         | Gmfb          |
| 1431688_at   | 0.95644 | hypothetical LOC73899                                                  | LOC73899      |
| 1431689_at   | 1.27575 | RIKEN cDNA 5830400J07 gene                                             | 5830400J07Rik |
| 1431690_at   | 0.91400 | "potassium voltage-gated channel, subfamily H (eag-related), member 3" | Kcnh3         |
| 1431691_a_at | 0.88573 | "RAB31, member RAS oncogene family"                                    | Rab31         |
| 1431692_a_at | 0.83295 | Casitas B-lineage lymphoma c                                           | Cblc          |
| 1431693_a_at | 1.08423 | interleukin 17B II17b                                                  |               |
| 1431694_a_at | 0.99688 | catenin beta interacting protein 1                                     | Ctnnbip1      |
| 1431695_at   | 0.90475 | rabphilin 3A-like (without C2 domains)                                 | Rph3al        |
| 1431696_at   | 1.04771 | RIKEN cDNA 4632413K17 gene                                             | 4632413K17Rik |
| 1431697_at   | 0.96320 | synaptojanin 2                                                         | Synj2         |
| 1431698_at   | 1.06024 | "ubiquitin associated and SH3 domain containing, A"                    | Ubash3a       |
| 1431699_at   | 0.82630 | "fucosyltransferase 4, pseudogene 1"                                   | Fut4-ps1      |
| 1431700_at   | 1.07848 | "glutamate receptor, ionotropic, NMDA2B (epsilon 2)"                   | Grin2b        |
| 1431701_a_at | 1.02181 | PDZ domain containing 1                                                | Pdzk1         |
| 1431702_at   | 1.12112 | ---                                                                    | ---           |
| 1431703_at   | 1.03164 | RIKEN cDNA 2900027M19 gene                                             | 2900027M19Rik |
| 1431704_a_at | 0.94582 | Ral GEF with PH domain and SH3 binding motif 2                         | Ralgps2       |
| 1431705_a_at | 1.00506 | mucolipin 2                                                            | Mcoln2        |
| 1431706_at   | 1.07771 | RAN binding protein 5                                                  | Ranbp5        |
| 1431707_a_at | 1.01540 | "pleckstrin homology, Sec7 and coiled-coil domains 3"                  | Pscd3         |
| 1431708_a_at | 1.52890 | cytotoxic granule-associated RNA binding protein 1                     | Tia1          |
| 1431709_at   | 0.90700 | "metallothionein-like 5, testis-specific (tesmin)"                     | Mtl5          |
| 1431710_at   | 0.93757 | CKLF-like MARVEL transmembrane domain containing 2A                    | Cmtm2a        |
| 1431711_a_at | 0.94666 | RIKEN cDNA 9030409G11 gene                                             | 9030409G11Rik |
| 1431712_a_at | 0.99337 | RIKEN cDNA 2310022A10 gene                                             | 2310022A10Rik |
| 1431713_at   | 1.04475 | suppressor of fused homolog (Drosophila)                               | Sufu          |

1431714\_at 1.02165 RIKEN cDNA 2310015D24 gene 2310015D24Rik  
1431715\_a\_at 0.91588 "ligase III, DNA, ATP-dependent" Lig3  
1431716\_at 0.88800 hect domain and RLD 4 Herc4  
1431717\_at 1.09950 RIKEN cDNA 3526401B18 gene 3526401B18Rik  
1431718\_at 0.85754 kinesin family member 15 Kif15  
1431719\_a\_at 0.89722 SLIT-ROBO Rho GTPase activating protein 1 Srgap1  
1431720\_at 1.06847 RIKEN cDNA 2810404F17 gene 2810404F17Rik  
1431721\_a\_at 0.89990 "protein Z, vitamin K-dependent plasma glycoprotein" Proz  
1431722\_a\_at 1.07362 arylformamidase Afmid  
1431723\_at 1.13823 RIKEN cDNA 1600022D10 gene 1600022D10Rik  
1431724\_a\_at 1.06035 "purinergic receptor P2Y, G-protein coupled 12" P2ry12  
1431725\_at 1.06318 formin 2 Fmn2  
1431726\_a\_at 0.92628 transmembrane protein 80 Tmem80  
1431727\_at 1.06759 submandibular gland protein C Smgc  
1431728\_at 1.13662 RIKEN cDNA 2310010I16 gene 2310010I16Rik  
1431729\_at 1.05008 spermatogenesis associated 17 Spata17  
1431730\_at 0.89871 RIKEN cDNA 4921506M07 gene 4921506M07Rik  
1431731\_at 1.00538 "BCL2/adenovirus E1B interacting protein 1, NIP2" Bnip2  
1431732\_at 1.10148 sperm associated antigen 16 Spag16  
1431733\_at 0.95932 alpha-kinase 1 Alpk1  
1431734\_a\_at 0.81682 "DnaJ (Hsp40) homolog, subfamily B, member 4" Dnajb4  
1431735\_at 1.12714 RIKEN cDNA 4930469G21 gene 4930469G21Rik  
1431736\_at 0.95267 RIKEN cDNA 4933405D12 gene 4933405D12Rik  
1431737\_at 1.00285 hypothetical LOC629820 LOC629820  
1431738\_at 0.93111 RIKEN cDNA 4921531P14 gene 4921531P14Rik  
1431739\_at 1.00893 mitochondrial translation optimization 1 homolog (*S. cerevisiae*) Mto1  
1431740\_at 1.03916 "solute carrier family 7, (cationic amino acid transporter, y+ system) member 13" Slc7a13  
1431741\_a\_at 0.89812 RIKEN cDNA 4930408O21 gene 4930408O21Rik  
1431742\_at 1.06697 RIKEN cDNA 1810053B23 gene 1810053B23Rik  
1431743\_a\_at 0.93519 "solute carrier family 4 (anion exchanger), member 1" Slc4a1  
1431744\_a\_at 0.98643 stromal membrane-associated protein 1 Smap1  
1431745\_a\_at 0.96392 zinc finger CCCH type containing 14 Zc3h14  
1431746\_a\_at 0.96277 ubiquitin-activating enzyme E1C Ube1c  
1431747\_at 1.12861 "ZW10 homolog (*Drosophila*), centromere/kinetochore protein" Zw10  
1431748\_a\_at 0.84494 ring finger and FYVE like domain containing protein Rffl  
1431749\_a\_at 1.09399 RAS guanyl releasing protein 1 Rasgrp1  
1431750\_at 0.89052 "Usher syndrome 2A (autosomal recessive, mild) homolog (human)" Ush2a  
1431751\_a\_at 0.94695 metallophosphoesterase domain containing 2 Mpped2  
1431752\_a\_at 0.96942 RIKEN cDNA 2900073H19 gene 2900073H19Rik  
1431753\_x\_at 0.95789 RIKEN cDNA 2900073H19 gene 2900073H19Rik  
1431754\_at 1.04478 RIKEN cDNA 4930578N16 gene 4930578N16Rik  
1431755\_a\_at 0.87831 coiled-coil domain containing 49 Ccdc49



1431756\_at 1.08534 "Adult male testis cDNA, RIKEN full-length enriched library,  
clone:4930516B21 product:unclassifiable, full insert sequence" ---

1431757\_s\_at 0.99141 RIKEN cDNA 5033417F24 gene 5033417F24Rik

1431758\_at 0.91781 cDNA sequence BC051628 BC051628

1431759\_at 0.91679 "zinc finger, BED domain containing 4 /// RIKEN cDNA 4930529C04 gene ///  
similar to zinc finger, BED domain containing 4" Zbed4 /// 4930529C04Rik /// LOC669068

1431760\_a\_at 0.91291 serologically defined colon cancer antigen 3 Sdccag3

1431761\_at 0.95754 ectonucleoside triphosphate diphosphohydrolase 4 Entpd4

1431762\_at 0.84041 HtrA serine peptidase 3 Htra3

1431763\_a\_at 1.04354 chymotrypsin-like Ctrl

1431764\_at 1.07241 RIKEN cDNA 2310067P03 gene 2310067P03Rik

1431765\_a\_at 1.04427 ribosomal protein S2 /// similar to 40S ribosomal protein S2 /// similar to 40S  
ribosomal protein S2 /// similar to 40S ribosomal protein S2 /// similar to 40S ribosomal protein S2 ///  
similar to 40S ribosomal protein S2 /// similar to 40S ribosomal protein S2 /// similar to 40S ribosomal  
protein S2 /// similar to 40S ribosomal protein S2 /// similar to 40S ribosomal protein S2 /// similar to  
40S ribosomal protein S2 /// similar to 40S ribosomal protein S2 /// hypothetical LOC634678 /// similar  
to 40S ribosomal protein S2 /// similar to 40S ribosomal protein S2 /// similar to 40S ribosomal protein  
S2 /// similar to 40S ribosomal protein S2 /// similar to 40S ribosomal protein S2 /// similar to 40S  
ribosomal protein S2 /// similar to 40S ribosomal protein S2 /// similar to 40S ribosomal protein S2 ///  
similar to 40S ribosomal protein S2 /// similar to 40S ribosomal protein S2 /// similar to 40S ribosomal  
protein S2 /// similar to 40S ribosomal protein S2 /// similar to 40S ribosomal protein S2 /// similar to  
ribosomal protein S2 /// similar to 40S ribosomal protein S2 /// similar to 40S ribosomal protein S2 ///  
similar to 40S ribosomal protein S2 /// similar to 40S ribosomal protein S2 /// similar to 40S ribosomal  
protein S2 /// similar to 40S ribosomal protein S2 /// similar to 40S ribosomal protein S2 /// similar to  
40S ribosomal protein S2 /// similar to 40S ribosomal protein S2 /// similar to 40S ribosomal protein  
S2 /// similar to 40S ribosomal protein S2 /// similar to 40S ribosomal protein S2 /// similar to 40S  
ribosomal protein S2 /// similar to 40S ribosomal protein S2 /// similar to 40S ribosomal protein S2  
Rps2 /// LOC243642 /// LOC544872 /// LOC545808 /// LOC546164 /// LOC546298 /// LOC620248 ///  
LOC620559 /// LOC621842 /// LOC623242 /// LOC628962 /// LOC629408 /// LOC634678 ///  
LOC635931 /// LOC637606 /// LOC639043 /// LOC639606 /// LOC665951 /// LOC666668 ///  
LOC666682 /// LOC667093 /// LOC667116 /// LOC667279 /// LOC667847 /// LOC669028 ///  
LOC669347 /// LOC669682 /// LOC670133 /// LOC670228 /// LOC670479 /// LOC670968 ///  
LOC671469 /// LOC671914 /// LOC671929 /// LOC672225 /// LOC672467 /// LOC674219 ///  
LOC674755 /// LOC675043 /// LOC676775 /// LOC676958 /// LOC677135

1431766\_x\_at 1.04941 ribosomal protein S2 Rps2

1431767\_at 1.07365 RIKEN cDNA 4930442G15 gene 4930442G15Rik

1431768\_a\_at 1.08693 protein arginine N-methyltransferase 3 Prmt3

1431769\_at 0.98200 RIKEN cDNA 2210406O10 gene 2210406O10Rik

1431770\_at 0.98163 calcium homeostasis endoplasmic reticulum protein Cherp

1431771\_a\_at 1.00124 interleukin-1 receptor-associated kinase 1 binding protein 1 Irak1bp1

1431772\_a\_at 1.08106 intersectin 2 Itsn2

1431773\_at 1.07927 chromobox homolog 1 (Drosophila HP1 beta) Cbx1

1431774\_a\_at 1.05224 RIKEN cDNA 4930404J24 gene 4930404J24Rik

|              |         |                                                                                          |               |       |
|--------------|---------|------------------------------------------------------------------------------------------|---------------|-------|
| 1431775_at   | 0.84819 | RIKEN cDNA 3100002H09 gene                                                               | 3100002H09Rik |       |
| 1431776_at   | 0.87846 | "transducer of ERBB2, 2"                                                                 | Tob2          |       |
| 1431777_a_at | 0.98421 | high mobility group nucleosomal binding domain 3                                         |               | Hmgn3 |
| 1431778_at   | 1.01513 | RIKEN cDNA 2310051N18 gene                                                               | 2310051N18Rik |       |
| 1431779_at   | 0.95689 | ---                                                                                      | ---           |       |
| 1431780_at   | 1.08007 | RIKEN cDNA 1700021K14 gene                                                               | 1700021K14Rik |       |
| 1431781_at   | 1.09224 | yippee-like 1 (Drosophila)                                                               | Ypell         |       |
| 1431782_s_at | 0.91446 | yippee-like 1 (Drosophila)                                                               | Ypell         |       |
| 1431783_at   | 1.02891 | RIKEN cDNA 1700010L04 gene                                                               | 1700010L04Rik |       |
| 1431784_a_at | 1.12611 | brix domain containing 5                                                                 | Bxdc5         |       |
| 1431785_at   | 0.99598 | ribonuclease T2 Rnaset2                                                                  |               |       |
| 1431786_s_at | 0.91921 | RIKEN cDNA 1190003J15 gene                                                               | 1190003J15Rik |       |
| 1431787_at   | 0.97864 | RIKEN cDNA 3300002A11 gene                                                               | 3300002A11Rik |       |
| 1431788_at   | 1.10551 | RIKEN cDNA 1700008G05 gene                                                               | 1700008G05Rik |       |
| 1431789_s_at | 1.24835 | transmembrane emp24 protein transport domain containing 5                                |               | Tmed5 |
| 1431790_at   | 0.93968 | RIKEN cDNA 4932412D23 gene                                                               | 4932412D23Rik |       |
| 1431791_a_at | 0.79892 | "protein tyrosine phosphatase, non-receptor type 13"                                     | Ptpn13        |       |
| 1431792_a_at | 0.74605 | serine/threonine kinase 11 interacting protein                                           | Stk11ip       |       |
| 1431793_at   | 1.07683 | RIKEN cDNA 3732407C23 gene                                                               | 3732407C23Rik |       |
| 1431794_at   | 0.97956 | RIKEN cDNA 4932434E15 gene                                                               | 4932434E15Rik |       |
| 1431795_a_at | 0.89345 | "sema domain, immunoglobulin domain (Ig), short basic domain, secreted, (semaphorin) 3B" | Sema3b        |       |
| 1431796_at   | 0.94702 | RIKEN cDNA 2810430I11 gene                                                               | 2810430I11Rik |       |
| 1431797_at   | 0.98299 | RIKEN cDNA 4921518K17 gene                                                               | 4921518K17Rik |       |
| 1431798_a_at | 1.11429 | "synapse defective 1, Rho GTPase, homolog 1 (C. elegans)"                                | Syde1         |       |
| 1431799_at   | 1.05114 | myeloid/lymphoid or mixed lineage-leukemia translocation to 4 homolog (Drosophila)       | Mllt4         |       |
| 1431800_at   | 0.97533 | RIKEN cDNA 1300010F03 gene                                                               | 1300010F03Rik |       |
| 1431801_at   | 1.02784 | Down syndrome cell adhesion molecule                                                     | Dscam         |       |
| 1431802_a_at | 1.19720 | "DNA segment, Chr 5, Wayne State University 178, expressed"                              | D5Wsu178e     |       |
| 1431803_at   | 0.91892 | "cytochrome P450, family 2, subfamily d, polypeptide 13"                                 | Cyp2d13       |       |
| 1431804_a_at | 0.89224 | trans-acting transcription factor 3                                                      | Sp3           |       |
| 1431805_a_at | 1.40813 | "rhopilin, Rho GTPase binding protein 2"                                                 | Rhpn2         |       |
| 1431806_at   | 0.94492 | RIKEN cDNA 4931408D14 gene                                                               | 4931408D14Rik |       |
| 1431807_at   | 0.89715 | F-box and WD-40 domain protein 8                                                         | Fbxw8         |       |
| 1431808_a_at | 0.67011 | "inter alpha-trypsin inhibitor, heavy chain 4"                                           | Itih4         |       |
| 1431809_at   | 1.00182 | RIKEN cDNA 4932442L08 gene                                                               | 4932442L08Rik |       |
| 1431810_a_at | 0.93222 | transmembrane and coiled-coil domains 4                                                  | Tmco4         |       |
| 1431811_a_at | 0.96734 | F-box only protein 34                                                                    | Fbxo34        |       |
| 1431812_a_at | 0.87009 | "solute carrier family 6 (neurotransmitter transporter, glycine), member 9"              | Slc6a9        |       |
| 1431813_at   | 1.10479 | myosin XVIIIb                                                                            | Myo18b        |       |
| 1431814_at   | 0.87443 | RIKEN cDNA 4932443L11 gene                                                               | 4932443L11Rik |       |

|              |         |                                                                                         |               |
|--------------|---------|-----------------------------------------------------------------------------------------|---------------|
| 1431815_a_at | 1.02580 | MMS19 (MET18 <i>S. cerevisiae</i> )-like                                                | Mms19l        |
| 1431816_at   | 1.05182 | testis expressed gene 9                                                                 | Tex9          |
| 1431817_at   | 0.87888 | "alcohol dehydrogenase 6 (class V), pseudogene 1"                                       | Adh6-ps1      |
| 1431818_at   | 0.75295 | RIKEN cDNA 1700012B15 gene                                                              | 1700012B15Rik |
| 1431819_at   | 1.04447 | ---                                                                                     | ---           |
| 1431820_at   | 1.12054 | RIKEN cDNA 4632404H12 gene                                                              | 4632404H12Rik |
| 1431821_a_at | 0.90686 | EPS8-like 1                                                                             | Eps8l1        |
| 1431822_a_at | 0.96689 | 5-azacytidine induced gene 2                                                            | Azi2          |
| 1431823_at   | 0.93411 | modulator of apoptosis 1                                                                | Moap1         |
| 1431824_at   | 0.96618 | cadherin 13                                                                             | Cdh13         |
| 1431825_at   | 0.95518 | serine/arginine-rich protein specific kinase 3                                          | Srpk3         |
| 1431826_a_at | 0.99503 | BR serine/threonine kinase 2                                                            | Brsk2         |
| 1431827_a_at | 1.07107 | tousled-like kinase 2 ( <i>Arabidopsis</i> )                                            | Tlk2          |
| 1431828_a_at | 0.92058 | synaptojanin 2                                                                          | Synj2         |
| 1431829_a_at | 0.78982 | ral guanine nucleotide dissociation stimulator-like 3                                   | Rgl3          |
| 1431830_at   | 0.96910 | zinc finger protein 329                                                                 | Zfp329        |
| 1431831_at   | 1.12703 | RIKEN cDNA 2210009G21 gene                                                              | 2210009G21Rik |
| 1431832_x_at | 1.11039 | exosome component 10                                                                    | Exosc10       |
| 1431833_a_at | 0.96593 | 3-hydroxy-3-methylglutaryl-Coenzyme A synthase 2                                        | Hmgcs2        |
| 1431834_a_at | 0.92370 | elastin microfibril interfacer 1                                                        | Emilin1       |
| 1431835_at   | 0.99712 | transcription elongation regulator 1-like                                               | Tcerg1l       |
| 1431836_x_at | 0.96734 | RIKEN cDNA 5430432N15 gene                                                              | 5430432N15Rik |
| 1431837_at   | 1.01412 | RIKEN cDNA 1200007C13 gene                                                              | 1200007C13Rik |
| 1431838_at   | 0.91045 | RIKEN cDNA 1700128E19 gene                                                              | 1700128E19Rik |
| 1431839_a_at | 0.95580 | coiled-coil domain containing 81                                                        | Ccdc81        |
| 1431840_at   | 0.97179 | DENN/MADD domain containing 1C                                                          | Dennd1c       |
| 1431841_at   | 0.92100 | RIKEN cDNA 4930434E21 gene                                                              | 4930434E21Rik |
| 1431842_at   | 0.98654 | RIKEN cDNA 4930422C21 gene                                                              | 4930422C21Rik |
| 1431843_a_at | 1.29766 | "nuclear factor of kappa light polypeptide gene enhancer in B-cells inhibitor, epsilon" | Nfkbie        |
| 1431844_at   | 0.97814 | "potassium large conductance calcium-activated channel, subfamily M, beta member 2"     | Kcnmb2        |
| 1431845_at   | 0.97112 | RIKEN cDNA 2810016G10 gene                                                              | 2810016G10Rik |
| 1431846_at   | 1.14102 | RIKEN cDNA 4930546C10 gene                                                              | 4930546C10Rik |
| 1431847_at   | 1.06592 | RIKEN cDNA 5330439K02 gene                                                              | 5330439K02Rik |
| 1431848_at   | 1.05232 | angiopoietin-like 2                                                                     | Angptl2       |
| 1431849_at   | 0.80050 | RIKEN cDNA 4933432B09 gene                                                              | 4933432B09Rik |
| 1431850_at   | 0.97848 | RIKEN cDNA 3200001D21 gene                                                              | 3200001D21Rik |
| 1431851_at   | 0.88823 | RIKEN cDNA 4930534P07 gene                                                              | 4930534P07Rik |
| 1431852_at   | 1.00472 | PR domain containing 8                                                                  | Prdm8         |
| 1431853_at   | 0.90169 | RIKEN cDNA 4933413C19 gene                                                              | 4933413C19Rik |
| 1431854_a_at | 0.93705 | RIKEN cDNA 4930452B06 gene                                                              | 4930452B06Rik |
| 1431855_at   | 0.95331 | RIKEN cDNA 4930570E03 gene                                                              | 4930570E03Rik |

1431856\_a\_at 0.80230 C1q and tumor necrosis factor related protein 6 C1qtnf6  
1431857\_at 0.97592 PHD finger protein 19 Phf19  
1431858\_at 0.91408 RIKEN cDNA 4930480K15 gene 4930480K15Rik  
1431859\_at 0.96227 RIKEN cDNA 4930414F18 gene 4930414F18Rik  
1431860\_at 0.99382 cDNA sequence BC026513 BC026513  
1431861\_a\_at 0.99304 outer dense fiber of sperm tails 2-like Odf2l  
1431862\_x\_at 0.92728 outer dense fiber of sperm tails 2-like Odf2l  
1431863\_at 1.04316 RIKEN cDNA 4931430N09 gene 4931430N09Rik  
1431864\_at 0.96098 F-box only protein 24 Fbxo24  
1431865\_a\_at 0.97174 RIKEN cDNA 4933405K07 gene 4933405K07Rik  
1431866\_at 0.91307 RIKEN cDNA 4930425K24 gene 4930425K24Rik  
1431867\_a\_at 0.83675 RIKEN cDNA 1700007B13 gene 1700007B13Rik  
1431868\_at 0.91514 A kinase (PRKA) anchor protein 4 Akap4  
1431869\_at 0.91638 RIKEN cDNA 5730419F03 gene 5730419F03Rik  
1431870\_at 0.93976 RIKEN cDNA 4930463O16 gene 4930463O16Rik  
1431871\_at 1.09944 thioredoxin domain containing 3 (spermatozoa) Txndc3  
1431872\_at 0.97543 RIKEN cDNA 4930449A18 gene 4930449A18Rik  
1431873\_a\_at 0.89463 epsilon-tubulin 1 Tube1  
1431874\_at 1.02915 RIKEN cDNA 4931429L15 gene 4931429L15Rik  
1431875\_a\_at 0.91790 E2F transcription factor 1 E2f1  
1431876\_at 1.17352 RIKEN cDNA 4931429P17 gene 4931429P17Rik  
1431877\_a\_at 1.00001 grainyhead-like 2 (Drosophila) Grhl2  
1431878\_at 0.98347 grainyhead-like 2 (Drosophila) Grhl2  
1431879\_at 0.87222 RIKEN cDNA 9030417H13 gene 9030417H13Rik  
1431880\_at 1.35025 RIKEN cDNA 3100003M19 gene 3100003M19Rik  
1431881\_at 1.00325 RIKEN cDNA 2410024F20 gene 2410024F20Rik  
1431882\_at 1.02988 "amyotrophic lateral sclerosis 2 (juvenile) chromosome region, candidate 12 (human)" Als2cr12  
1431883\_at 0.91226 tachykinin 1 Tac1  
1431884\_at 1.00549 RIKEN cDNA 1110019B22 gene 1110019B22Rik  
1431885\_a\_at 0.93934 MUS81 endonuclease homolog (yeast) Mus81  
1431886\_at 0.98197 endoplasmic reticulum (ER) to nucleus signalling 1 Ern1  
1431887\_at 0.92250 "RNA binding motif 31, Y-linked" Rbm31y  
1431888\_s\_at 0.88118 pregnancy-specific glycoprotein 21 Psg21  
1431889\_x\_at 0.98661 pregnancy-specific glycoprotein 21 Psg21  
1431890\_a\_at 0.78255 myeloid/lymphoid or mixed lineage-leukemia translocation to 3 homolog (Drosophila) Mllt3  
1431891\_at 0.76856 "zinc finger, SWIM domain containing 5" Zswim5  
1431892\_a\_at 0.97083 "phospholipase C, delta 3" Plcd3  
1431893\_a\_at 1.05886 "prenyl (solanesyl) diphosphate synthase, subunit 1" Pdss1  
1431894\_at 1.39247 RIKEN cDNA 4833424O12 gene 4833424O12Rik  
1431895\_at 0.98272 RIKEN cDNA 4933434M16 gene 4933434M16Rik  
1431896\_at 0.93946 Six6 opposite strand transcript 1 Six6os1

|              |         |                                                             |               |
|--------------|---------|-------------------------------------------------------------|---------------|
| 1431897_at   | 1.04424 | carbohydrate (N-acetylgalactosamine 4-0) sulfotransferase 9 | Chst9         |
| 1431898_at   | 0.92421 | RIKEN cDNA 4930403J07 gene                                  | 4930403J07Rik |
| 1431899_at   | 0.95167 | "NK6 transcription factor related, locus 3 (Drosophila)"    | Nkx6-3        |
| 1431900_a_at | 0.84991 | forkhead box A3                                             | Foxa3         |
| 1431901_a_at | 0.94068 | "6-phosphofructo-2-kinase/fructose-2,6-biphosphatase 2"     | Pfkfb2        |
| 1431902_at   | 0.93952 | RIKEN cDNA 4930401A09 gene                                  | 4930401A09Rik |
| 1431903_at   | 1.01627 | RIKEN cDNA 4930524C18 gene                                  | 4930524C18Rik |
| 1431904_at   | 0.94681 | RIKEN cDNA 4933427G17 gene                                  | 4933427G17Rik |
| 1431905_s_at | 0.92868 | RIKEN cDNA 4933427G17 gene                                  | 4933427G17Rik |
| 1431906_at   | 0.88270 | RIKEN cDNA 2700068H02 gene                                  | 2700068H02Rik |
| 1431907_at   | 1.08145 | RIKEN cDNA 4933404M02 gene                                  | 4933404M02Rik |
| 1431908_at   | 1.05279 | RIKEN cDNA 4933408J17 gene                                  | 4933408J17Rik |
| 1431909_at   | 0.98053 | "zinc finger CCCH type, antiviral 1"                        | Zc3hav1       |
| 1431910_at   | 1.00951 | RIKEN cDNA 5730460C07 gene                                  | 5730460C07Rik |
| 1431911_at   | 0.90777 | RIKEN cDNA 4931423N10 gene                                  | 4931423N10Rik |
| 1431912_at   | 1.11996 | RIKEN cDNA 2700089I24 gene                                  | 2700089I24Rik |
| 1431913_a_at | 0.87813 | "phosphodiesterase 3A, cGMP inhibited"                      | Pde3a         |
| 1431914_at   | 0.98499 | "phosphodiesterase 3A, cGMP inhibited"                      | Pde3a         |
| 1431915_at   | 1.00900 | RIKEN cDNA 4930442E04 gene                                  | 4930442E04Rik |
| 1431916_at   | 0.97969 | RIKEN cDNA 9030618K22 gene                                  | 9030618K22Rik |
| 1431917_at   | 0.80743 | "phosphatidylinositol glycan anchor biosynthesis, class Q"  | Pigq          |
| 1431918_at   | 0.98839 | RIKEN cDNA 1700036A12 gene                                  | 1700036A12Rik |
| 1431919_at   | 0.97889 | rotatin                                                     | Rtnn          |
| 1431920_a_at | 1.09863 | RIKEN cDNA 2010004A03 gene                                  | 2010004A03Rik |
| 1431921_a_at | 1.00281 | stromal antigen 1                                           | Stag1         |
| 1431922_at   | 1.05876 | intestine specific homeobox                                 | Isx           |
| 1431923_at   | 1.15021 | RIKEN cDNA 2810401C16 gene                                  | 2810401C16Rik |
| 1431924_at   | 0.92500 | RIKEN cDNA 4930432N10 gene                                  | 4930432N10Rik |
| 1431925_at   | 1.01326 | RIKEN cDNA 4933433H22 gene                                  | 4933433H22Rik |
| 1431926_a_at | 0.87092 | RIKEN cDNA 1300010M03 gene                                  | 1300010M03Rik |
| 1431927_at   | 0.99727 | RIKEN cDNA 5033417F24 gene                                  | 5033417F24Rik |
| 1431928_at   | 0.99279 | titin                                                       | Ttn           |
| 1431929_a_at | 0.92609 | syntaxin 17                                                 | Stx17         |
| 1431930_x_at | 0.99750 | cardiolipin synthase 1                                      | Crls1         |
| 1431931_a_at | 0.99942 | "RAB, member of RAS oncogene family-like 2A"                | Rabl2a        |
| 1431932_s_at | 0.96077 | tripartite motif-containing 44                              | Trim44        |
| 1431933_a_at | 1.04008 | decapping enzyme                                            | Dcp1a         |
| 1431934_at   | 0.87674 | RIKEN cDNA 4930505O20 gene                                  | 4930505O20Rik |
| 1431935_at   | 1.10675 | lipoic acid synthetase                                      | Lias          |
| 1431936_a_at | 0.70812 | neuraminidase 2                                             | Neu2          |
| 1431937_at   | 0.92367 | kinesin family member 24                                    | Kif24         |
| 1431938_a_at | 1.02830 | phosphomannomutase 2                                        | Pmm2          |
| 1431939_a_at | 0.95978 | myc induced nuclear antigen                                 | Mina          |

|              |         |                                                                                   |               |
|--------------|---------|-----------------------------------------------------------------------------------|---------------|
| 1431940_at   | 1.31261 | hypothetical protein LOC74457                                                     | LOC74457      |
| 1431941_at   | 1.07746 | "solute carrier family 35, member B4"                                             | Slc35b4       |
| 1431942_at   | 0.95043 | WW domain-containing oxidoreductase                                               | Wwox          |
| 1431943_at   | 1.03021 | RIKEN cDNA 2210011K15 gene                                                        | 2210011K15Rik |
| 1431944_at   | 0.99305 | RIKEN cDNA 4930484H19 gene                                                        | 4930484H19Rik |
| 1431945_at   | 0.98462 | ADP-ribosylation factor-like 13A                                                  | Arl13a        |
| 1431946_a_at | 0.88036 | "amyloid beta (A4) precursor protein-binding, family A, member 1 binding protein" | Apba2bp       |
| 1431947_at   | 2.17703 | low density lipoprotein receptor                                                  | Ldlr          |
| 1431948_a_at | 1.06965 | pantothenate kinase 2 (Hallervorden-Spatz syndrome)                               | Pank2         |
| 1431949_at   | 1.08677 | RIKEN cDNA 4930544F09 gene                                                        | 4930544F09Rik |
| 1431950_at   | 1.06638 | RIKEN cDNA 4930528G23 gene                                                        | 4930528G23Rik |
| 1431951_a_at | 0.88310 | ubiquitin specific peptidase 16                                                   | Usp16         |
| 1431952_at   | 1.02520 | RIKEN cDNA 4930532I03 gene                                                        | 4930532I03Rik |
| 1431953_at   | 0.97548 | "ATPase, aminophospholipid transporter-like, class I, type 8A, member 2"          | Atp8a2        |
| 1431954_x_at | 0.91933 | RIKEN cDNA 4930431C11 gene                                                        | 4930431C11Rik |
| 1431955_at   | 1.06048 | RIKEN cDNA 4930453H23 gene                                                        | 4930453H23Rik |
| 1431956_at   | 0.94321 | RIKEN cDNA 5830453K13 gene                                                        | 5830453K13Rik |
| 1431957_at   | 1.01705 | leucine rich repeat containing 44                                                 | Lrrc44        |
| 1431958_at   | 0.97209 | sperm associated antigen 16                                                       | Spag16        |
| 1431959_x_at | 0.93146 | pregnancy-specific glycoprotein 21                                                | Psg21         |
| 1431960_at   | 1.70856 | WW domain-containing oxidoreductase                                               | Wwox          |
| 1431961_at   | 0.97645 | dedicator of cytokinesis 8                                                        | Dock8         |
| 1431962_a_at | 0.94617 | Stam binding protein                                                              | Stampbp       |
| 1431963_at   | 0.93146 | RIKEN cDNA 4930556A20 gene                                                        | 4930556A20Rik |
| 1431964_at   | 1.09221 | RIKEN cDNA 4921518J05 gene                                                        | 4921518J05Rik |
| 1431965_at   | 0.81117 | RIKEN cDNA 4933411E08 gene                                                        | 4933411E08Rik |
| 1431966_at   | 0.96802 | ATP/GTP binding protein-like 3                                                    | Agbl3         |
| 1431967_at   | 1.06803 | RIKEN cDNA 1700006A11 gene                                                        | 1700006A11Rik |
| 1431968_at   | 0.99619 | spermatogenesis associated 16                                                     | Spata16       |
| 1431969_at   | 0.96745 | RIKEN cDNA 4930402D18 gene                                                        | 4930402D18Rik |
| 1431970_at   | 1.04650 | transmembrane 7 superfamily member 4                                              | Tm7sf4        |
| 1431971_at   | 0.91626 | ---                                                                               | ---           |
| 1431972_a_at | 0.99400 | granule cell antiserum positive 14                                                | Gcap14        |
| 1431973_at   | 0.99500 | septin 6                                                                          | 6-Sep         |
| 1431974_at   | 0.91791 | RIKEN cDNA 4930443G12 gene                                                        | 4930443G12Rik |
| 1431975_at   | 0.86775 | RIKEN cDNA 4930521O11 gene                                                        | 4930521O11Rik |
| 1431976_at   | 0.96952 | RIKEN cDNA 4930526F13 gene                                                        | 4930526F13Rik |
| 1431977_at   | 0.81875 | RIKEN cDNA 4933402J15 gene                                                        | 4933402J15Rik |
| 1431978_at   | 0.97783 | RIKEN cDNA 8430437L04 gene                                                        | 8430437L04Rik |
| 1431979_at   | 0.96657 | RIKEN cDNA 4930444M15 gene                                                        | 4930444M15Rik |
| 1431980_a_at | 0.98716 | arsenic (+3 oxidation state) methyltransferase                                    | As3mt         |

|              |         |                                                       |               |
|--------------|---------|-------------------------------------------------------|---------------|
| 1431981_at   | 1.01928 | "hypoxia inducible factor 1, alpha subunit"           | Hif1a         |
| 1431982_at   | 1.01813 | Rho GTPase activating protein 19                      | Arhgap19      |
| 1431983_at   | 0.92284 | myosin IIIA                                           | Myo3a         |
| 1431984_at   | 0.92023 | RIKEN cDNA 1700007F19 gene                            | 1700007F19Rik |
| 1431985_at   | 0.85890 | RIKEN cDNA 2210010B09 gene                            | 2210010B09Rik |
| 1431986_at   | 1.08586 | RIKEN cDNA 4933421A08 gene                            | 4933421A08Rik |
| 1431987_at   | 1.04181 | RIKEN cDNA 4930510E17 gene                            | 4930510E17Rik |
| 1431988_at   | 0.87329 | RIKEN cDNA 1700112E06 gene                            | 1700112E06Rik |
| 1431989_at   | 0.89351 | RIKEN cDNA 4930433E13 gene                            | 4930433E13Rik |
| 1431990_at   | 0.92077 | RIKEN cDNA 4930429D17 gene                            | 4930429D17Rik |
| 1431991_at   | 0.97144 | RIKEN cDNA 2410004P03 gene                            | 2410004P03Rik |
| 1431992_at   | 0.81745 | RIKEN cDNA 4930568K20 gene                            | 4930568K20Rik |
| 1431993_a_at | 0.82929 | ring finger protein 38                                | Rnf38         |
| 1431994_at   | 0.86613 | RIKEN cDNA 4930432B10 gene                            | 4930432B10Rik |
| 1431995_at   | 1.00386 | anthrax toxin receptor 1                              | Antxr1        |
| 1431996_at   | 0.94201 | ---                                                   | ---           |
| 1431997_at   | 1.12001 | RIKEN cDNA 3000002C10 gene                            | 3000002C10Rik |
| 1431998_at   | 1.04737 | RIKEN cDNA 4930432L08 gene                            | 4930432L08Rik |
| 1431999_at   | 0.94918 | polymerase (RNA) III (DNA directed) polypeptide F     | Polr3f        |
| 1432000_a_at | 1.08205 | death effector domain-containing                      | Dedd          |
| 1432001_at   | 1.02406 | "zinc finger, MYND domain containing 17"              | Zmynd17       |
| 1432002_at   | 1.05195 | RIKEN cDNA 2810471M01 gene                            | 2810471M01Rik |
| 1432003_a_at | 0.95689 | ring finger protein 41                                | Rnf41         |
| 1432004_a_at | 0.92753 | dynamamin 2                                           | Dnm2          |
| 1432005_at   | 0.94075 | dynamamin 2                                           | Dnm2          |
| 1432006_at   | 1.45332 | "adaptor protein complex AP-2, alpha 2 subunit"       | Ap2a2         |
| 1432007_s_at | 2.48757 | "adaptor protein complex AP-2, alpha 2 subunit"       | Ap2a2         |
| 1432008_at   | 0.99043 | transmembrane protein 86B                             | Tmem86b       |
| 1432009_at   | 0.91043 | RIKEN cDNA 4933415D12 gene                            | 4933415D12Rik |
| 1432010_at   | 0.90965 | RIKEN cDNA 4933408N05 gene                            | 4933408N05Rik |
| 1432011_at   | 0.94964 | RIKEN cDNA 2900052L18 gene                            | 2900052L18Rik |
| 1432012_a_at | 0.95880 | NOL1/NOP2/Sun domain family 6                         | Nsun6         |
| 1432013_a_at | 1.16963 | RIKEN cDNA 2610016C23 gene                            | 2610016C23Rik |
| 1432014_at   | 1.09102 | RIKEN cDNA 6530409C15 gene                            | 6530409C15Rik |
| 1432015_a_at | 0.97223 | RIKEN cDNA 4933428M03 gene                            | 4933428M03Rik |
| 1432016_a_at | 0.90584 | isocitrate dehydrogenase 3 (NAD+) alpha               | Idh3a         |
| 1432017_at   | 1.06830 | huntingtin interacting protein 1                      | Hip1          |
| 1432018_at   | 1.17811 | achaete-scute complex homolog-like 2 (Drosophila)     | Ascl2         |
| 1432019_at   | 1.01320 | TruB pseudouridine (psi) synthase homolog 1 (E. coli) | Trub1         |
| 1432020_at   | 0.94347 | RIKEN cDNA 6330411D24 gene                            | 6330411D24Rik |
| 1432021_at   | 0.88984 | copine III                                            | Cpne3         |
| 1432022_at   | 1.12328 | Cdc42 GTPase-activating protein                       | Cdgap         |
| 1432023_a_at | 0.97452 | RIKEN cDNA 1700019H03 gene                            | 1700019H03Rik |

|              |         |                                                               |      |               |  |
|--------------|---------|---------------------------------------------------------------|------|---------------|--|
| 1432024_at   | 0.95478 | RIKEN cDNA 2310015L07                                         | gene | 2310015L07Rik |  |
| 1432025_at   | 0.99181 | RIKEN cDNA 4933430A20                                         | gene | 4933430A20Rik |  |
| 1432026_a_at | 0.99924 | hect domain and RLD 5                                         |      | Herc5         |  |
| 1432027_a_at | 0.88724 | "TBC1 domain family, member 14"                               |      | Tbc1d14       |  |
| 1432028_at   | 1.13733 | RAB11 family interacting protein 2 (class I)                  |      | Rab11fip2     |  |
| 1432029_a_at | 0.97351 | stromal membrane-associated protein 1                         |      | Smap1         |  |
| 1432030_at   | 0.89255 | RIKEN cDNA 4930434J06                                         | gene | 4930434J06Rik |  |
| 1432031_at   | 0.86157 | RIKEN cDNA 4930563E18                                         | gene | 4930563E18Rik |  |
| 1432032_a_at | 0.91770 | artemin                                                       |      | Artn          |  |
| 1432033_at   | 0.88946 | netrin G2                                                     |      | Ntng2         |  |
| 1432034_at   | 0.96070 | neurogenin 3                                                  |      | Neurog3       |  |
| 1432035_at   | 0.89405 | RIKEN cDNA 4933427J07                                         | gene | 4933427J07Rik |  |
| 1432036_at   | 0.86001 | RIKEN cDNA 4933436H12                                         | gene | 4933436H12Rik |  |
| 1432037_at   | 1.07375 | "protein phosphatase 1, regulatory (inhibitor) subunit 9A"    |      | Ppp1r9a       |  |
| 1432038_at   | 0.99891 | RIKEN cDNA 4930509J09                                         | gene | 4930509J09Rik |  |
| 1432039_a_at | 1.10664 | Lrp2 binding protein                                          |      | Lrp2bp        |  |
| 1432040_at   | 0.98178 | KCNQ1 overlapping transcript 1                                |      | Kcnq1ot1      |  |
| 1432041_at   | 0.90090 | RIKEN cDNA 4930519A11                                         | gene | 4930519A11Rik |  |
| 1432042_a_at | 1.08806 | smu-1 suppressor of mec-8 and unc-52 homolog (C. elegans)     |      | Smu1          |  |
| 1432043_at   | 0.92986 | smu-1 suppressor of mec-8 and unc-52 homolog (C. elegans)     |      | Smu1          |  |
| 1432044_a_at | 1.05575 | RIKEN cDNA 4921504E06                                         | gene | 4921504E06Rik |  |
| 1432045_at   | 0.96168 | testis-specific serine kinase 5                               |      | Tssk5         |  |
| 1432046_at   | 0.90349 | RIKEN cDNA 4930404K06                                         | gene | 4930404K06Rik |  |
| 1432047_at   | 0.94365 | DEP domain containing 2                                       |      | Depdc2        |  |
| 1432048_at   | 0.91449 | RIKEN cDNA 6330565B04                                         | gene | 6330565B04Rik |  |
| 1432049_at   | 1.02529 | RIKEN cDNA 4930422I22                                         | gene | 4930422I22Rik |  |
| 1432050_at   | 1.01139 | RIKEN cDNA 4930571B16                                         | gene | 4930571B16Rik |  |
| 1432051_at   | 1.01496 | coiled-coil domain containing 7                               |      | Ccdc7         |  |
| 1432052_at   | 1.04625 | Exosome component 1                                           |      | Exosc1        |  |
| 1432053_at   | 0.90228 | "regulatory factor X, 4 (influences HLA class II expression)" |      | Rfx4          |  |
| 1432054_at   | 1.02259 | "golgi autoantigen, golgin subfamily a, 1"                    |      | Golga1        |  |
| 1432055_at   | 0.90860 | SAM and SH3 domain containing 1                               |      | Sash1         |  |
| 1432056_at   | 0.96552 | "carboxypeptidase, vitellogenic-like"                         |      | Cpvl          |  |
| 1432057_a_at | 0.86284 | PR domain containing 5                                        |      | Prdm5         |  |
| 1432058_at   | 0.91804 | RIKEN cDNA 4930474H20                                         | gene | 4930474H20Rik |  |
| 1432059_x_at | 0.88610 | RIKEN cDNA 5031425E22                                         | gene | 5031425E22Rik |  |
| 1432060_at   | 0.98519 | IQ motif containing with AAA domain                           |      | Iqca          |  |
| 1432061_at   | 0.98341 | RIKEN cDNA 4933406B17                                         | gene | 4933406B17Rik |  |
| 1432062_at   | 0.91338 | MAM domain containing glycosylphosphatidylinositol anchor 1   |      | Mdga1         |  |
| 1432063_at   | 0.98990 | RIKEN cDNA 4833427F10                                         | gene | 4833427F10Rik |  |
| 1432064_at   | 0.94342 | U box domain containing 5                                     |      | Ubox5         |  |
| 1432065_at   | 1.19771 | RIKEN cDNA 3100003L13                                         | gene | 3100003L13Rik |  |
| 1432066_at   | 0.95226 | "DnaJ (Hsp40) homolog, subfamily A, member 3"                 |      | Dnaja3        |  |



|              |         |                                                                                   |      |               |        |
|--------------|---------|-----------------------------------------------------------------------------------|------|---------------|--------|
| 1432067_at   | 1.12134 | RIKEN cDNA 4930473O22                                                             | gene | 4930473O22Rik |        |
| 1432068_a_at | 1.01723 | ectonucleoside triphosphate diphosphohydrolase 7                                  |      |               | Entpd7 |
| 1432069_at   | 0.88696 | RIKEN cDNA 1700023G09                                                             | gene | 1700023G09Rik |        |
| 1432070_at   | 1.03527 | RIKEN cDNA 4921511C10                                                             | gene | 4921511C10Rik |        |
| 1432071_at   | 0.93038 | RIKEN cDNA 6330437I11                                                             | gene | 6330437I11Rik |        |
| 1432072_at   | 1.04005 | kinesin family member 2A                                                          |      | Kif2a         |        |
| 1432073_at   | 0.91721 | RIKEN cDNA 1700113I22                                                             | gene | 1700113I22Rik |        |
| 1432074_at   | 0.93601 | RIKEN cDNA 4930517E11                                                             | gene | 4930517E11Rik |        |
| 1432075_a_at | 0.95244 | tektin 1                                                                          |      | Tekt1         |        |
| 1432076_at   | 1.09602 | RIKEN cDNA 4933430H16                                                             | gene | 4933430H16Rik |        |
| 1432077_at   | 0.95838 | protection of telomeres 1                                                         |      | Pot1          |        |
| 1432078_at   | 1.03034 | RIKEN cDNA 4930453L07                                                             | gene | 4930453L07Rik |        |
| 1432079_at   | 1.03129 | RIKEN cDNA 4933436N17                                                             | gene | 4933436N17Rik |        |
| 1432080_s_at | 1.02083 | MYST histone acetyltransferase 1                                                  |      | Myst1         |        |
| 1432081_at   | 1.07787 | "cytochrome P450, family 1, subfamily b, polypeptide 1"                           |      | Cyp1b1        |        |
| 1432082_at   | 1.05873 | RIKEN cDNA 4933436I20                                                             | gene | 4933436I20Rik |        |
| 1432083_a_at | 1.01040 | leucine rich repeat containing 23                                                 |      | Lrrc23        |        |
| 1432084_at   | 1.01877 | RIKEN cDNA 4921515G04                                                             | gene | 4921515G04Rik |        |
| 1432085_at   | 1.00468 | RIKEN cDNA 4930425O10                                                             | gene | 4930425O10Rik |        |
| 1432086_a_at | 0.90662 | RIB43A domain with coiled-coils 2                                                 |      | Ribc2         |        |
| 1432087_at   | 0.88359 | RIKEN cDNA 4933406G16                                                             | gene | 4933406G16Rik |        |
| 1432088_at   | 0.91837 | ventricular zone expressed PH domain homolog 1 (zebrafish)                        |      | Veph1         |        |
| 1432089_at   | 0.99404 | RIKEN cDNA 4930550C17                                                             | gene | 4930550C17Rik |        |
| 1432090_at   | 0.83762 | coiled-coil domain containing 83                                                  |      | Ccdc83        |        |
| 1432091_a_at | 0.98878 | RUN and TBC1 domain containing 3                                                  |      | Rutbc3        |        |
| 1432092_a_at | 1.00503 | "GULP, engulfment adaptor PTB domain containing 1"                                |      | Gulp1         |        |
| 1432093_at   | 1.03678 | RIKEN cDNA 2310005A03                                                             | gene | 2310005A03Rik |        |
| 1432094_a_at | 1.01228 | RIKEN cDNA 1700034M03                                                             | gene | 1700034M03Rik |        |
| 1432095_at   | 1.04296 | RIKEN cDNA 4921534H16                                                             | gene | 4921534H16Rik |        |
| 1432096_at   | 0.90773 | small nuclear ribonucleoprotein N                                                 |      | Snrpn         |        |
| 1432097_a_at | 0.88514 | "DNA cross-link repair 1A, PSO2 homolog (S. cerevisiae)"                          |      | Dclre1a       |        |
| 1432098_a_at | 0.98012 | olfactory receptor 701                                                            |      | Olf701        |        |
| 1432099_a_at | 0.97653 | proline dehydrogenase (oxidase) 2                                                 |      | Prodh2        |        |
| 1432100_a_at | 1.12782 | RIKEN cDNA 4930478P22                                                             | gene | 4930478P22Rik |        |
| 1432101_a_at | 0.82120 | testis-specific serine kinase 4                                                   |      | Tssk4         |        |
| 1432102_at   | 1.08931 | regulating synaptic membrane exocytosis 2                                         |      | Rims2         |        |
| 1432103_a_at | 0.95033 | SH3-domain GRB2-like 3                                                            |      | Sh3gl3        |        |
| 1432104_a_at | 0.93089 | allantoicase                                                                      |      | Allc          |        |
| 1432105_at   | 1.00329 | sirtuin 5 (silent mating type information regulation 2 homolog) 5 (S. cerevisiae) |      | Sirt5         |        |
| 1432106_at   | 0.89019 | RIKEN cDNA 6530403M18                                                             | gene | 6530403M18Rik |        |
| 1432107_at   | 0.98570 | RIKEN cDNA 2310010M20                                                             | gene | 2310010M20Rik |        |
| 1432108_at   | 1.52832 | polycomb group ring finger 6                                                      |      | Pcgf6         |        |

|              |         |                                                               |      |               |       |
|--------------|---------|---------------------------------------------------------------|------|---------------|-------|
| 1432109_at   | 1.01787 | RIKEN cDNA 4930578I07                                         | gene | 4930578I07Rik |       |
| 1432110_at   | 0.99969 | RIKEN cDNA 4930402F06                                         | gene | 4930402F06Rik |       |
| 1432111_at   | 1.00163 | RIKEN cDNA 4930542D17                                         | gene | 4930542D17Rik |       |
| 1432112_at   | 1.05852 | RIKEN cDNA 4930589L23                                         | gene | 4930589L23Rik |       |
| 1432113_at   | 0.94568 | coiled-coil domain containing 18                              |      | Ccdc18        |       |
| 1432114_at   | 0.91298 | RIKEN cDNA 1110035E04                                         | gene | 1110035E04Rik |       |
| 1432115_a_at | 0.94319 | "phosphatidylinositol glycan anchor biosynthesis, class N"    |      |               | Pign  |
| 1432116_at   | 1.16493 | RIKEN cDNA 1700031F05                                         | gene | 1700031F05Rik |       |
| 1432117_at   | 0.96261 | RIKEN cDNA 4933422A05                                         | gene | 4933422A05Rik |       |
| 1432118_at   | 1.01523 | RIKEN cDNA 2410012E07                                         | gene | 2410012E07Rik |       |
| 1432119_at   | 1.00635 | RIKEN cDNA 4933405I11                                         | gene | 4933405I11Rik |       |
| 1432120_at   | 0.85653 | RIKEN cDNA 4921513D11                                         | gene | 4921513D11Rik |       |
| 1432121_a_at | 0.84838 | leucine rich repeat containing 44                             |      | Lrrc44        |       |
| 1432122_at   | 0.82290 | leucine rich repeat containing 44                             |      | Lrrc44        |       |
| 1432123_at   | 1.01239 | RIKEN cDNA 4930455H04                                         | gene | 4930455H04Rik |       |
| 1432124_at   | 1.03797 | RIKEN cDNA 4921511I17                                         | gene | 4921511I17Rik |       |
| 1432125_at   | 1.08331 | "adaptor-related protein complex 3, mu 2 subunit"             |      |               | Ap3m2 |
| 1432126_at   | 1.00886 | RIKEN cDNA 1700072H12                                         | gene | 1700072H12Rik |       |
| 1432127_at   | 0.97564 | RIKEN cDNA 4933401L05                                         | gene | 4933401L05Rik |       |
| 1432128_at   | 1.01605 | RIKEN cDNA 4930455B06                                         | gene | 4930455B06Rik |       |
| 1432129_a_at | 1.00794 | paired related homeobox 1                                     |      | Prrx1         |       |
| 1432130_a_at | 0.79972 | tetratricopeptide repeat domain 14                            |      | Ttc14         |       |
| 1432131_at   | 0.98767 | RIKEN cDNA 4930404N11                                         | gene | 4930404N11Rik |       |
| 1432132_at   | 1.18076 | RIKEN cDNA 4933401D09                                         | gene | 4933401D09Rik |       |
| 1432133_at   | 1.00300 | RIKEN cDNA 2210022J03                                         | gene | 2210022J03Rik |       |
| 1432134_at   | 1.06560 | speedy homolog A (Drosophila)                                 |      | Spdya         |       |
| 1432135_s_at | 0.92811 | speedy homolog A (Drosophila) /// similar to speedy homolog 1 |      | Spdya ///     |       |
| LOC638442    |         |                                                               |      |               |       |
| 1432136_s_at | 0.86250 | "zinc finger, DHHC domain containing 4"                       |      | Zdhhc4        |       |
| 1432137_at   | 1.07395 | RIKEN cDNA 4933434P08                                         | gene | 4933434P08Rik |       |
| 1432138_at   | 1.01875 | RIKEN cDNA 1700080N15                                         | gene | 1700080N15Rik |       |
| 1432139_at   | 1.00111 | serine/arginine-rich protein specific kinase 3                |      | Srpk3         |       |
| 1432140_at   | 1.02812 | gasdermin 2                                                   |      | Gsdm2         |       |
| 1432141_x_at | 0.92315 | gasdermin 2                                                   |      | Gsdm2         |       |
| 1432142_at   | 0.99426 | "solute carrier family 35, member F4"                         |      | Slc35f4       |       |
| 1432143_a_at | 0.90287 | high mobility group box transcription factor 1                |      | Hbp1          |       |
| 1432144_a_at | 1.17177 | ring finger and CHY zinc finger domain containing 1           |      |               | Rchy1 |
| 1432145_at   | 0.83248 | RIKEN cDNA 2310026I22                                         | gene | 2310026I22Rik |       |
| 1432146_at   | 0.91783 | "cation channel, sperm associated 3"                          |      | Catsper3      |       |
| 1432147_at   | 1.27706 | RIKEN cDNA 4930447F24                                         | gene | 4930447F24Rik |       |
| 1432148_at   | 1.05370 | RIKEN cDNA 4930533K18                                         | gene | 4930533K18Rik |       |
| 1432149_at   | 0.98055 | DPH1 homolog (S. cerevisiae)                                  |      | Dph1          |       |
| 1432150_at   | 1.05123 | transmembrane protein 59                                      |      | Tmem59        |       |

|              |         |                                                                                                                                     |      |                    |
|--------------|---------|-------------------------------------------------------------------------------------------------------------------------------------|------|--------------------|
| 1432151_at   | 1.31858 | RIKEN cDNA 2810409H07                                                                                                               | gene | 2810409H07Rik      |
| 1432152_at   | 0.94686 | RIKEN cDNA 2610109H07                                                                                                               | gene | 2610109H07Rik      |
| 1432153_at   | 0.99465 | RIKEN cDNA 4933426B08                                                                                                               | gene | 4933426B08Rik      |
| 1432154_at   | 1.06824 | RIKEN cDNA 4933407I08                                                                                                               | gene | 4933407I08Rik      |
| 1432155_at   | 0.94945 | Wiskott-Aldrich syndrome-like (human)                                                                                               |      | Wasl               |
| 1432156_a_at | 0.87312 | ring finger protein 32                                                                                                              |      | Rnf32              |
| 1432157_at   | 1.06656 | RIKEN cDNA 4930515G13                                                                                                               | gene | 4930515G13Rik      |
| 1432158_a_at | 0.90246 | trafficking protein particle complex 2                                                                                              |      | Trappc2            |
| 1432159_a_at | 0.96306 | testis expressed gene 13                                                                                                            |      | Tex13              |
| 1432160_at   | 1.09219 | G protein-coupled receptor kinase-interactor 2                                                                                      |      | Git2               |
| 1432161_a_at | 1.12755 | protein prenyltransferase alpha subunit repeat containing 1                                                                         |      | Ptar1              |
| 1432162_s_at | 0.94780 | protein prenyltransferase alpha subunit repeat containing 1                                                                         |      | Ptar1              |
| 1432163_at   | 1.01086 | RIKEN cDNA 4930567K12                                                                                                               | gene | 4930567K12Rik      |
| 1432164_a_at | 1.13278 | "glycine cleavage system protein H (aminomethyl carrier) /// similar to Glycine cleavage system H protein, mitochondrial precursor" |      | Gcsh /// LOC674321 |
| 1432165_at   | 0.91246 | RIKEN cDNA 8430422H06                                                                                                               | gene | 8430422H06Rik      |
| 1432166_at   | 1.05021 | RIKEN cDNA E130018N17                                                                                                               | gene | E130018N17Rik      |
| 1432167_at   | 1.06088 | ---                                                                                                                                 | ---  |                    |
| 1432168_at   | 0.86670 | RIKEN cDNA D730045A05                                                                                                               | gene | D730045A05Rik      |
| 1432169_at   | 0.97178 | RIKEN cDNA 4930523O13                                                                                                               | gene | 4930523O13Rik      |
| 1432170_at   | 0.94175 | "Ts translation elongation factor, mitochondrial"                                                                                   |      | Tsfm               |
| 1432171_at   | 1.13938 | RIKEN cDNA 4933409F18                                                                                                               | gene | 4933409F18Rik      |
| 1432172_at   | 0.93732 | hypothetical protein LOC670300                                                                                                      |      | LOC670300          |
| 1432173_at   | 0.90567 | "serine (or cysteine) peptidase inhibitor, clade B (ovalbumin), member 12"                                                          |      | Serpinb12          |
| 1432174_a_at | 0.99527 | RIKEN cDNA 4933425K02                                                                                                               | gene | 4933425K02Rik      |
| 1432175_at   | 0.98908 | RIKEN cDNA 5430434I15                                                                                                               | gene | 5430434I15Rik      |
| 1432176_a_at | 0.93701 | ---                                                                                                                                 | ---  |                    |
| 1432177_a_at | 1.06478 | menage a trois 1                                                                                                                    |      | Mnat1              |
| 1432178_at   | 1.05093 | RIKEN cDNA 4933431I19                                                                                                               | gene | 4933431I19Rik      |
| 1432179_x_at | 1.01338 | RIKEN cDNA 2810433K01                                                                                                               | gene | 2810433K01Rik      |
| 1432180_at   | 1.05567 | RIKEN cDNA 4933403G17                                                                                                               | gene | 4933403G17Rik      |
| 1432181_s_at | 1.18586 | endothelial cell growth factor 1 (platelet-derived)                                                                                 |      | Ecgf1              |
| 1432182_at   | 1.04411 | RIKEN cDNA 4922502B01                                                                                                               | gene | 4922502B01Rik      |
| 1432183_at   | 0.96832 | transmembrane protein 116                                                                                                           |      | Tmem116            |
| 1432184_a_at | 1.15157 | RIKEN cDNA 2610204M08                                                                                                               | gene | 2610204M08Rik      |
| 1432185_a_at | 0.96137 | speedy homolog B (Drosophila)                                                                                                       |      | Spdyb              |
| 1432186_at   | 0.92567 | RIKEN cDNA 1700028J19                                                                                                               | gene | 1700028J19Rik      |
| 1432187_at   | 1.01604 | nucleoporin 43                                                                                                                      |      | Nup43              |
| 1432188_s_at | 1.12440 | nucleoporin 43                                                                                                                      |      | Nup43              |
| 1432189_a_at | 0.80197 | SRY-box containing gene 5                                                                                                           |      | Sox5               |
| 1432190_at   | 1.02976 | SRY-box containing gene 5                                                                                                           |      | Sox5               |
| 1432191_at   | 1.03253 | ---                                                                                                                                 | ---  |                    |

|              |         |                                                                    |         |               |
|--------------|---------|--------------------------------------------------------------------|---------|---------------|
| 1432192_at   | 1.06518 | RIKEN cDNA 4930483K19                                              | gene    | 4930483K19Rik |
| 1432193_at   | 1.07233 | RIKEN cDNA 4930412L05                                              | gene    | 4930412L05Rik |
| 1432194_at   | 0.93836 | RIKEN cDNA 9530020I12                                              | gene    | 9530020I12Rik |
| 1432195_s_at | 1.05144 | cyclin L2                                                          | Ccnl2   |               |
| 1432196_a_at | 0.91598 | Down syndrome cell adhesion molecule-like 1                        | Dscaml1 |               |
| 1432197_at   | 1.01813 | RIKEN cDNA 4933417D19                                              | gene    | 4933417D19Rik |
| 1432198_at   | 1.10414 | ---                                                                | ---     |               |
| 1432199_at   | 0.93290 | RIKEN cDNA 4930568D16                                              | gene    | 4930568D16Rik |
| 1432200_at   | 1.19505 | RIKEN cDNA C030044M21                                              | gene    | C030044M21Rik |
| 1432201_a_at | 0.94535 | "zinc finger, SWIM domain containing 2"                            | Zswim2  |               |
| 1432202_a_at | 1.08508 | WD repeat domain 51A                                               | Wdr51a  |               |
| 1432203_at   | 0.99287 | RIKEN cDNA 4930563P21                                              | gene    | 4930563P21Rik |
| 1432204_at   | 0.80811 | RIKEN cDNA 4930570B17                                              | gene    | 4930570B17Rik |
| 1432205_a_at | 0.99799 | RIKEN cDNA C130038G02                                              | gene    | C130038G02Rik |
| 1432206_at   | 1.09374 | RIKEN cDNA 9030404E10                                              | gene    | 9030404E10Rik |
| 1432207_a_at | 0.95452 | "target of EGR1, member 1 (nuclear)"                               | Toe1    |               |
| 1432208_at   | 1.06419 | RIKEN cDNA 4930459C07                                              | gene    | 4930459C07Rik |
| 1432209_at   | 1.10711 | RIKEN cDNA 1810010K12                                              | gene    | 1810010K12Rik |
| 1432210_at   | 0.89970 | RIKEN cDNA 4933401H06                                              | gene    | 4933401H06Rik |
| 1432211_a_at | 0.97809 | f-box only protein 9                                               | Fbxo9   |               |
| 1432212_at   | 1.01159 | RIKEN cDNA 1810073H04                                              | gene    | 1810073H04Rik |
| 1432213_at   | 0.93093 | RIKEN cDNA 9530047P18                                              | gene    | 9530047P18Rik |
| 1432214_at   | 1.08218 | RIKEN cDNA 1700017D01                                              | gene    | 1700017D01Rik |
| 1432215_s_at | 0.99489 | RIKEN cDNA 4930417O22                                              | gene    | 4930417O22Rik |
| 1432216_s_at | 1.12397 | "membrane protein, palmitoylated 7 (MAGUK p55 subfamily member 7)" | Mpp7    |               |
| 1432217_a_at | 1.06721 | WD repeat domain 16                                                | Wdr16   |               |
| 1432218_a_at | 1.01258 | nucleolar protein 9                                                | Nol9    |               |
| 1432219_at   | 1.06430 | nucleolar protein 9                                                | Nol9    |               |
| 1432220_at   | 1.03133 | RIKEN cDNA 4933430L12                                              | gene    | 4933430L12Rik |
| 1432221_at   | 0.99465 | RIKEN cDNA 5330417H12                                              | gene    | 5330417H12Rik |
| 1432222_at   | 1.07249 | RIKEN cDNA A930015G24                                              | gene    | A930015G24Rik |
| 1432223_at   | 1.04098 | RIKEN cDNA 4930552N02                                              | gene    | 4930552N02Rik |
| 1432224_at   | 0.99057 | RIKEN cDNA 4831407H17                                              | gene    | 4831407H17Rik |
| 1432225_at   | 1.01420 | ---                                                                | ---     |               |
| 1432226_at   | 1.13968 | RIKEN cDNA 4930548G14                                              | gene    | 4930548G14Rik |
| 1432227_at   | 0.90031 | suppressor of variegation 3-9 homolog 1 (Drosophila)               | Suv39h1 |               |
| 1432228_at   | 1.06657 | RIKEN cDNA 4933406B15                                              | gene    | 4933406B15Rik |
| 1432229_a_at | 0.93545 | "chromodomain protein, Y chromosome-like 2"                        | Cdyl2   |               |
| 1432230_at   | 1.20494 | huntingtin interacting protein 1                                   | Hip1    |               |
| 1432231_at   | 1.11926 | RIKEN cDNA 4930526H09                                              | gene    | 4930526H09Rik |
| 1432232_at   | 0.96819 | REST corepressor 3                                                 | Rcor3   |               |
| 1432233_at   | 0.99931 | RIKEN cDNA 1110020C17                                              | gene    | 1110020C17Rik |

|              |         |                                                                                           |               |
|--------------|---------|-------------------------------------------------------------------------------------------|---------------|
| 1432234_at   | 1.07875 | RIKEN cDNA 4933438B17 gene                                                                | 4933438B17Rik |
| 1432235_at   | 0.95379 | epithelial stromal interaction 1 (breast)                                                 | Epsti1        |
| 1432236_a_at | 0.91861 | suppressor of variegation 3-9 homolog 1 (Drosophila)                                      | Suv39h1       |
| 1432237_at   | 0.97687 | RIKEN cDNA 5730522E02 gene                                                                | 5730522E02Rik |
| 1432238_at   | 1.05980 | "spermatogenesis associated, serine-rich 1"                                               | Spats1        |
| 1432239_at   | 1.07428 | RIKEN cDNA 1700102J08 gene                                                                | 1700102J08Rik |
| 1432240_at   | 1.01661 | RIKEN cDNA 4930533L02 gene                                                                | 4930533L02Rik |
| 1432241_at   | 0.94833 | RIKEN cDNA 9030205G03 gene                                                                | 9030205G03Rik |
| 1432242_at   | 0.89409 | RIKEN cDNA 4930447N08 gene                                                                | 4930447N08Rik |
| 1432243_a_at | 0.99504 | RIKEN cDNA 4933433G15 gene                                                                | 4933433G15Rik |
| 1432244_at   | 1.00787 | RIKEN cDNA 4930507D10 gene                                                                | 4930507D10Rik |
| 1432245_s_at | 1.17264 | tetratricopeptide repeat domain 9C                                                        | Ttc9c         |
| 1432246_at   | 0.98490 | RIKEN cDNA 4922502N22 gene                                                                | 4922502N22Rik |
| 1432247_at   | 0.92803 | RIKEN cDNA 4633402D09 gene                                                                | 4633402D09Rik |
| 1432248_at   | 0.93814 | RIKEN cDNA 5430402P08 gene                                                                | 5430402P08Rik |
| 1432249_a_at | 1.04569 | "excision repair cross-complementing rodent repair deficiency, complementation group 8"   | Ercc8         |
| 1432250_at   | 0.94045 | "UTP14, U3 small nucleolar ribonucleoprotein, homolog A (yeast)"                          | Utp14a        |
| 1432251_at   | 0.95665 | RIKEN cDNA 4930403O15 gene                                                                | 4930403O15Rik |
| 1432252_a_at | 1.14262 | RIKEN cDNA 4933406K04 gene                                                                | 4933406K04Rik |
| 1432253_at   | 1.00564 | RIKEN cDNA 4921523P09 gene                                                                | 4921523P09Rik |
| 1432254_at   | 1.00846 | RIKEN cDNA C030013D06 gene                                                                | C030013D06Rik |
| 1432255_at   | 0.99331 | microtubule associated serine/threonine kinase 1                                          | Mast1         |
| 1432256_at   | 0.95470 | RIKEN cDNA 1700111N16 gene                                                                | 1700111N16Rik |
| 1432257_at   | 0.89703 | gasdermin domain containing 2                                                             | Gsdmdc2       |
| 1432258_at   | 0.96931 | RIKEN cDNA 9430014N10 gene                                                                | 9430014N10Rik |
| 1432259_s_at | 0.83410 | RIKEN cDNA 4931415C17 gene /// RIKEN cDNA 2810487C13 gene 4931415C17Rik /// 2810487C13Rik |               |
| 1432260_at   | 1.04807 | G protein-coupled receptor 39                                                             | Gpr39         |
| 1432261_at   | 0.96748 | RIKEN cDNA 2310039D24 gene                                                                | 2310039D24Rik |
| 1432262_at   | 0.89142 | RIKEN cDNA 4930504E06 gene                                                                | 4930504E06Rik |
| 1432263_a_at | 0.89056 | cytochrome c oxidase subunit VIIa polypeptide 2-like                                      | Cox7a2l       |
| 1432264_x_at | 0.91146 | cytochrome c oxidase subunit VIIa polypeptide 2-like                                      | Cox7a2l       |
| 1432265_at   | 0.89488 | RIKEN cDNA 4930445B16 gene                                                                | 4930445B16Rik |
| 1432266_at   | 1.08780 | cDNA sequence BC026657                                                                    | BC026657      |
| 1432267_at   | 0.85704 | RIKEN cDNA 6720483E21 gene                                                                | 6720483E21Rik |
| 1432268_at   | 1.14628 | RIKEN cDNA 2310068J16 gene                                                                | 2310068J16Rik |
| 1432269_a_at | 0.84147 | SH3-domain kinase binding protein 1                                                       | Sh3kbp1       |
| 1432270_a_at | 0.91900 | chromatin modifying protein 5                                                             | Chmp5         |
| 1432271_a_at | 1.06230 | "DCN1, defective in cullin neddylation 1, domain containing 5 (S. cerevisiae)"            | Dcun1d5       |
| 1432272_a_at | 0.83798 | "excision repair cross-complementing rodent repair deficiency, complementation group 4"   | Ercc4         |

|              |         |                                                      |               |
|--------------|---------|------------------------------------------------------|---------------|
| 1432273_a_at | 1.02499 | "Duffy blood group, chemokine receptor"              | Darc          |
| 1432274_at   | 1.01865 | RIKEN cDNA 4930543N07 gene                           | 4930543N07Rik |
| 1432275_at   | 1.03713 | inhibitor of kappaB kinase beta                      | Ikbkb         |
| 1432276_at   | 0.92531 | RIKEN cDNA 4930519F16 gene                           | 4930519F16Rik |
| 1432277_at   | 1.02432 | RIKEN cDNA 4930565D16 gene                           | 4930565D16Rik |
| 1432278_at   | 1.06127 | RIKEN cDNA 4930471M09 gene                           | 4930471M09Rik |
| 1432279_at   | 0.95623 | RIKEN cDNA 4930452L02 gene                           | 4930452L02Rik |
| 1432280_at   | 1.05747 | RIKEN cDNA 2310007L24 gene                           | 2310007L24Rik |
| 1432281_a_at | 0.80530 | integrin beta 6                                      | Itgb6         |
| 1432282_a_at | 0.86391 | RIKEN cDNA 2010305C02 gene                           | 2010305C02Rik |
| 1432283_at   | 0.97641 | RIKEN cDNA 4930417G10 gene                           | 4930417G10Rik |
| 1432284_at   | 1.03512 | mirror-image polydactyly gene 1 homolog (human)      | Mipol1        |
| 1432285_at   | 1.07285 | RIKEN cDNA 1700128F08 gene                           | 1700128F08Rik |
| 1432286_at   | 1.03316 | "polymerase (DNA-directed), epsilon 4 (p12 subunit)" | Pole4         |
| 1432287_a_at | 1.04004 | "syntrophin, gamma 1"                                | Sntg1         |
| 1432288_at   | 0.91557 | RIKEN cDNA 5830468F06 gene                           | 5830468F06Rik |
| 1432289_a_at | 0.93332 | junctional sarcoplasmic reticulum protein 1          | Jsrp1         |
| 1432290_at   | 0.92051 | RIKEN cDNA 1700040G22 gene                           | 1700040G22Rik |
| 1432291_at   | 0.92235 | RIKEN cDNA 0610033M10 gene                           | 0610033M10Rik |
| 1432292_at   | 1.16096 | RIKEN cDNA 4930504C09 gene                           | 4930504C09Rik |
| 1432293_at   | 1.10927 | RIKEN cDNA 4930579G18 gene                           | 4930579G18Rik |
| 1432294_at   | 1.02708 | RIKEN cDNA 9330177L23 gene                           | 9330177L23Rik |
| 1432295_a_at | 0.91031 | RIKEN cDNA 2310035K24 gene                           | 2310035K24Rik |
| 1432296_a_at | 1.08502 | integrin alpha V                                     | Itgav         |
| 1432297_at   | 1.01172 | "zinc finger, imprinted 2"                           | Zim2          |
| 1432298_at   | 0.96252 | RIKEN cDNA 4921508M14 gene                           | 4921508M14Rik |
| 1432299_at   | 0.92134 | RIKEN cDNA 4921513I08 gene                           | 4921513I08Rik |
| 1432300_at   | 0.94350 | RIKEN cDNA 1190003K10 gene                           | 1190003K10Rik |
| 1432301_a_at | 1.03311 | RIKEN cDNA 1700074P13 gene                           | 1700074P13Rik |
| 1432302_s_at | 0.94836 | RIKEN cDNA 2410024N13 gene                           | 2410024N13Rik |
| 1432303_at   | 0.84479 | RIKEN cDNA 9330198I05 gene                           | 9330198I05Rik |
| 1432304_a_at | 1.03497 | RIKEN cDNA 9030624J02 gene                           | 9030624J02Rik |
| 1432305_at   | 1.09072 | RIKEN cDNA 4930542C16 gene                           | 4930542C16Rik |
| 1432306_at   | 0.88867 | RIKEN cDNA A930023M06 gene                           | A930023M06Rik |
| 1432307_at   | 0.90641 | RIKEN cDNA 1700086D15 gene                           | 1700086D15Rik |
| 1432308_at   | 0.92182 | RIKEN cDNA 1700058C13 gene                           | 1700058C13Rik |
| 1432309_at   | 0.97368 | RIKEN cDNA 9130410C08 gene                           | 9130410C08Rik |
| 1432310_at   | 0.89051 | RIKEN cDNA 6530401F13 gene                           | 6530401F13Rik |
| 1432311_at   | 1.27646 | transmembrane protein 168                            | Tmem168       |
| 1432312_a_at | 0.95415 | RIKEN cDNA 4931440B09 gene                           | 4931440B09Rik |
| 1432313_at   | 0.88383 | RIKEN cDNA 4933433F19 gene                           | 4933433F19Rik |
| 1432314_at   | 1.04559 | RIKEN cDNA 4930554C24 gene                           | 4930554C24Rik |
| 1432315_at   | 0.91135 | RIKEN cDNA 4930483C13 gene                           | 4930483C13Rik |

|              |         |                                                              |           |               |
|--------------|---------|--------------------------------------------------------------|-----------|---------------|
| 1432316_at   | 1.05878 | RIKEN cDNA 4933439N14                                        | gene      | 4933439N14Rik |
| 1432317_at   | 0.90901 | RIKEN cDNA 9430078K24                                        | gene      | 9430078K24Rik |
| 1432318_at   | 1.05141 | UDP-glucose ceramide glucosyltransferase-like 1              | Ugcgl1    |               |
| 1432319_at   | 1.19759 | RIKEN cDNA 1700085C21                                        | gene      | 1700085C21Rik |
| 1432320_at   | 0.91750 | RIKEN cDNA 9430065F17                                        | gene      | 9430065F17Rik |
| 1432321_at   | 0.97931 | cellular nucleic acid binding protein 2                      | Cnbp2     |               |
| 1432322_at   | 0.90841 | RIKEN cDNA 2310016E02                                        | gene      | 2310016E02Rik |
| 1432323_at   | 0.96471 | RIKEN cDNA 8430436N08                                        | gene      | 8430436N08Rik |
| 1432324_at   | 1.02112 | RIKEN cDNA 4930432J09                                        | gene      | 4930432J09Rik |
| 1432325_at   | 0.99732 | RIKEN cDNA 4930502M04                                        | gene      | 4930502M04Rik |
| 1432326_at   | 1.03127 | RIKEN cDNA 1700042B14                                        | gene      | 1700042B14Rik |
| 1432327_at   | 0.96376 | RIKEN cDNA 9530067L11                                        | gene      | 9530067L11Rik |
| 1432328_at   | 1.16904 | RIKEN cDNA 4930516K23                                        | gene      | 4930516K23Rik |
| 1432329_a_at | 1.01633 | megakaryocyte-associated tyrosine kinase                     | Matk      |               |
| 1432330_at   | 0.90551 | complement factor H-like                                     | LOC381294 |               |
| 1432331_a_at | 0.70566 | paired related homeobox 2                                    | Prrx2     |               |
| 1432332_a_at | 0.98337 | nudix (nucleoside diphosphate linked moiety X)-type motif 19 | Nudt19    |               |
| 1432333_a_at | 0.99728 | RIKEN cDNA 1700027D21                                        | gene      | 1700027D21Rik |
| 1432334_at   | 0.88065 | RIKEN cDNA 4930488P18                                        | gene      | 4930488P18Rik |
| 1432335_at   | 1.01287 | RIKEN cDNA 4930551O13                                        | gene      | 4930551O13Rik |
| 1432336_at   | 0.98579 | RIKEN cDNA 5033404E19                                        | gene      | 5033404E19Rik |
| 1432337_at   | 0.95214 | "Fanconi anemia, complementation group L"                    | Fancl     |               |
| 1432338_at   | 0.93946 | RIKEN cDNA 4833419O12                                        | gene      | 4833419O12Rik |
| 1432339_at   | 1.00731 | RIKEN cDNA 4933432I03                                        | gene      | 4933432I03Rik |
| 1432340_at   | 0.99914 | RIKEN cDNA 1700121N20                                        | gene      | 1700121N20Rik |
| 1432341_at   | 0.96934 | RIKEN cDNA 1700022A22                                        | gene      | 1700022A22Rik |
| 1432342_at   | 1.02490 | nicotinamide nucleotide adenyltransferase 3                  | Nmnat3    |               |
| 1432343_at   | 0.97514 | RIKEN cDNA 4930419G24                                        | gene      | 4930419G24Rik |
| 1432344_a_at | 0.75940 | amyloid beta (A4) precursor-like protein 2                   | Aplp2     |               |
| 1432345_at   | 0.89196 | RIKEN cDNA 1700048F04                                        | gene      | 1700048F04Rik |
| 1432346_a_at | 0.91564 | cadherin 23 (otocadherin)                                    | Cdh23     |               |
| 1432347_at   | 1.01129 | RIKEN cDNA 4931428L18                                        | gene      | 4931428L18Rik |
| 1432348_at   | 1.02730 | RIKEN cDNA 4930524O07                                        | gene      | 4930524O07Rik |
| 1432349_a_at | 1.02145 | syncoilin                                                    | Sync      |               |
| 1432350_at   | 0.93953 | syncoilin                                                    | Sync      |               |
| 1432351_at   | 0.99183 | RIKEN cDNA 9030625G05                                        | gene      | 9030625G05Rik |
| 1432352_at   | 1.59311 | RIKEN cDNA 5730405I09                                        | gene      | 5730405I09Rik |
| 1432353_at   | 0.86897 | RIKEN cDNA 4933421B21                                        | gene      | 4933421B21Rik |
| 1432354_at   | 1.20448 | RIKEN cDNA 1700003H04                                        | gene      | 1700003H04Rik |
| 1432355_at   | 0.95170 | RIKEN cDNA 2210039B01                                        | gene      | 2210039B01Rik |
| 1432356_at   | 1.32244 | RIKEN cDNA 1700056N10                                        | gene      | 1700056N10Rik |
| 1432357_at   | 0.86304 | RIKEN cDNA 4930566D17                                        | gene      | 4930566D17Rik |
| 1432358_at   | 1.01361 | RIKEN cDNA 1110008I14                                        | gene      | 1110008I14Rik |

1432359\_at 1.14119 RIKEN cDNA 4930435F05 gene 4930435F05Rik  
1432360\_a\_at 0.82032 transmembrane and tetratricopeptide repeat containing 4 Tmtc4  
1432361\_a\_at 0.93347 centromere protein P Cenpp  
1432362\_at 1.32645 centromere protein P Cenpp  
1432363\_at 1.04202 RIKEN cDNA 2410018E23 gene 2410018E23Rik  
1432364\_at 1.11943 RIKEN cDNA 4930556N13 gene 4930556N13Rik  
1432365\_a\_at 0.95065 RIKEN cDNA 4930556L07 gene 4930556L07Rik  
1432366\_at 0.86235 RIKEN cDNA 4930447K03 gene 4930447K03Rik  
1432367\_a\_at 1.06938 ubiquitin fusion degradation 1 like Ufd1l  
1432368\_at 0.94107 RIKEN cDNA 4930594M17 gene 4930594M17Rik  
1432369\_at 1.02580 RIKEN cDNA 3010027C24 gene 3010027C24Rik  
1432370\_at 0.98933 RIKEN cDNA 4933411E02 gene 4933411E02Rik  
1432371\_a\_at 1.07002 RIKEN cDNA 1700109K24 gene 1700109K24Rik  
1432372\_a\_at 1.06909 sepiapterin reductase Spr  
1432373\_at 1.05329 RIKEN cDNA 4930533B01 gene 4930533B01Rik  
1432374\_a\_at 1.09914 "DNA segment, Chr 5, Wayne State University 178, expressed" D5Wsu178e  
1432375\_a\_at 1.09196 spermatogenesis associated 3 Spata3  
1432376\_at 0.93314 RIKEN cDNA 3830403N18 gene 3830403N18Rik  
1432377\_x\_at 1.03503 shroom family member 3 Shroom3  
1432378\_at 1.00605 RIKEN cDNA C030004G16 gene C030004G16Rik  
1432379\_at 1.00116 RIKEN cDNA 4930590A17 gene 4930590A17Rik  
1432380\_s\_at 0.86372 RIKEN cDNA 4933426G20 gene /// similar to gasdermin 1  
4933426G20Rik /// LOC665769  
1432381\_a\_at 0.97182 fibrous sheath-interacting protein 1 /// similar to fibrous sheath-interacting  
protein 1 Fsip1 /// LOC640450  
1432382\_at 0.99898 RIKEN cDNA 4930434B07 gene 4930434B07Rik  
1432383\_a\_at 1.13777 armadillo repeat containing 9 Armc9  
1432384\_a\_at 1.04292 methyltransferase like 6 Mettl6  
1432385\_a\_at 0.90502 ATP/GTP binding protein 1 Agtpbp1  
1432386\_a\_at 0.90050 PHD finger protein 7 Phf7  
1432387\_at 0.95215 plasma glutamate carboxypeptidase Pgcp  
1432388\_at 1.03290 RIKEN cDNA 5430440P10 gene 5430440P10Rik  
1432389\_at 1.00033 RIKEN cDNA 4933438A12 gene 4933438A12Rik  
1432390\_at 1.06740 RIKEN cDNA 4933400F21 gene 4933400F21Rik  
1432391\_at 1.09755 coiled-coil domain containing 21 Ccdc21  
1432392\_at 1.02012 kinesin family member 2C Kif2c  
1432393\_a\_at 1.16466 RIKEN cDNA 5730409G07 gene 5730409G07Rik  
1432394\_a\_at 1.01770 apoptosis antagonizing transcription factor Aatf  
1432395\_at 0.89277 RIKEN cDNA 1700039E15 gene 1700039E15Rik  
1432396\_at 1.01262 RIKEN cDNA 3110018I06 gene 3110018I06Rik  
1432397\_at 0.94885 testis-specific serine kinase 3 Tssk3  
1432398\_at 0.91150 RIKEN cDNA 1700084J12 gene 1700084J12Rik  
1432399\_a\_at 0.95284 Eph receptor A1 EphA1



|              |                                                                    |               |
|--------------|--------------------------------------------------------------------|---------------|
| 1432400_at   | 0.91477 Eph receptor A1 EphA1                                      |               |
| 1432401_a_at | 0.98635 RIKEN cDNA 4930511M11 gene                                 | 4930511M11Rik |
| 1432402_at   | 0.94298 RIKEN cDNA 4930402F11 gene                                 | 4930402F11Rik |
| 1432403_at   | 1.00814 RIKEN cDNA 4933402C06 gene                                 | 4933402C06Rik |
| 1432404_at   | 0.92899 RIKEN cDNA 4930505A04 gene                                 | 4930505A04Rik |
| 1432405_a_at | 1.04038 "phospholipase C, zeta 1" Plcz1                            |               |
| 1432406_at   | 0.97421 carboxylesterase 7 Ces7                                    |               |
| 1432407_at   | 1.13391 RIKEN cDNA 4933426D04 gene                                 | 4933426D04Rik |
| 1432408_a_at | 1.10461 "DNA segment, KIST 2" D0Kist2                              |               |
| 1432409_at   | 0.94237 "protein kinase, cAMP dependent regulatory, type II alpha" | Prkar2a       |
| 1432410_a_at | 0.83365 bone morphogenetic protein 7 Bmp7                          |               |
| 1432411_a_at | 0.98716 F-box and WD-40 domain protein 2 Fbxw2                     |               |
| 1432412_at   | 0.98976 RIKEN cDNA 9530004P13 gene                                 | 9530004P13Rik |
| 1432413_at   | 1.05078 RIKEN cDNA 1810044A24 gene                                 | 1810044A24Rik |
| 1432414_at   | 0.92675 --- ---                                                    |               |
| 1432415_at   | 1.01988 "RAB3C, member RAS oncogene family" Rab3c                  |               |
| 1432416_a_at | 1.12403 nucleophosmin 1 Npm1                                       |               |
| 1432417_a_at | 0.95370 tetraspanin 2 Tspan2                                       |               |
| 1432418_a_at | 0.96349 "creatine kinase, mitochondrial 1, ubiquitous" Ckmt1       |               |
| 1432419_a_at | 1.02340 RIKEN cDNA 2700078K21 gene                                 | 2700078K21Rik |
| 1432420_a_at | 1.03769 RIKEN cDNA 2310002L09 gene                                 | 2310002L09Rik |
| 1432421_at   | 1.07933 postmeiotic segregation increased 2 (S. cerevisiae) Pms2   |               |
| 1432422_at   | 1.00261 RIKEN cDNA 1700063K16 gene                                 | 1700063K16Rik |
| 1432423_a_at | 0.91513 RIKEN cDNA C530008M17 gene                                 | C530008M17Rik |
| 1432424_at   | 1.04798 RIKEN cDNA 4930505H01 gene                                 | 4930505H01Rik |
| 1432425_at   | 1.00628 RIKEN cDNA 4930418G15 gene                                 | 4930418G15Rik |
| 1432426_a_at | 1.06982 ubiquitin-conjugating enzyme E2F (putative) Ube2f          |               |
| 1432427_at   | 0.99146 NADH dehydrogenase (ubiquinone) 1 beta subcomplex 4        | Ndufb4        |
| 1432428_at   | 0.97388 ankyrin repeat domain 55 Ankrd55                           |               |
| 1432429_at   | 0.98563 RIKEN cDNA 8430437N05 gene                                 | 8430437N05Rik |
| 1432430_a_at | 0.86054 RIKEN cDNA 1700081L11 gene                                 | 1700081L11Rik |
| 1432431_s_at | 0.80315 RIKEN cDNA 2900006F19 gene                                 | 2900006F19Rik |
| 1432432_a_at | 1.16029 "RAB3C, member RAS oncogene family" Rab3c                  |               |
| 1432433_at   | 1.03858 RIKEN cDNA 4930524N10 gene                                 | 4930524N10Rik |
| 1432434_at   | 0.87358 RIKEN cDNA 4930522N08 gene                                 | 4930522N08Rik |
| 1432435_s_at | 1.05944 RIKEN cDNA C030004A17 gene                                 | C030004A17Rik |
| 1432436_a_at | 0.91452 adenylate kinase 3 Ak3                                     |               |
| 1432437_at   | 0.87520 RIKEN cDNA 4933413N12 gene                                 | 4933413N12Rik |
| 1432438_at   | 0.87209 RIKEN cDNA 4930597L12 gene                                 | 4930597L12Rik |
| 1432439_at   | 1.05056 zinc finger protein 715 Zfp715                             |               |
| 1432440_at   | 0.96910 RIKEN cDNA 1700111E14 gene                                 | 1700111E14Rik |
| 1432441_at   | 0.96218 RIKEN cDNA 4933413J09 gene                                 | 4933413J09Rik |
| 1432442_at   | 0.99381 RIKEN cDNA 4930481F22 gene                                 | 4930481F22Rik |

|              |         |                                                                     |      |               |         |
|--------------|---------|---------------------------------------------------------------------|------|---------------|---------|
| 1432443_at   | 1.03915 | RIKEN cDNA 1700021P22                                               | gene | 1700021P22Rik |         |
| 1432444_a_at | 1.09406 | RIKEN cDNA 1810011O16                                               | gene | 1810011O16Rik |         |
| 1432445_at   | 0.91627 | RIKEN cDNA 2310016G11                                               | gene | 2310016G11Rik |         |
| 1432446_at   | 1.12642 | RIKEN cDNA 1700016K13                                               | gene | 1700016K13Rik |         |
| 1432447_a_at | 0.98071 | RIKEN cDNA 2310005N01                                               | gene | 2310005N01Rik |         |
| 1432448_at   | 0.87189 | RIKEN cDNA 2600006K01                                               | gene | 2600006K01Rik |         |
| 1432449_at   | 0.95489 | RIKEN cDNA 4930564B18                                               | gene | 4930564B18Rik |         |
| 1432450_at   | 0.91598 | RIKEN cDNA 8030423J24                                               | gene | 8030423J24Rik |         |
| 1432451_at   | 1.00325 | RIKEN cDNA 4930445E18                                               | gene | 4930445E18Rik |         |
| 1432452_at   | 0.95363 | RIKEN cDNA 1700054O19                                               | gene | 1700054O19Rik |         |
| 1432453_a_at | 1.00113 | "membrane-spanning 4-domains, subfamily A, member 10"               |      |               | Ms4a10  |
| 1432454_at   | 0.99602 | RIKEN cDNA 2410137M14                                               | gene | 2410137M14Rik |         |
| 1432455_a_at | 0.96993 | prolactin-like protein C 4                                          |      |               | Prlpc4  |
| 1432456_at   | 0.95850 | RIKEN cDNA 4930533B18                                               | gene | 4930533B18Rik |         |
| 1432457_at   | 1.07196 | RIKEN cDNA 4930448F12                                               | gene | 4930448F12Rik |         |
| 1432458_at   | 1.00194 | RIKEN cDNA 1700011F14                                               | gene | 1700011F14Rik |         |
| 1432459_a_at | 1.00984 | zinc finger and BTB domain containing 32                            |      |               | Zbtb32  |
| 1432460_at   | 0.99661 | RIKEN cDNA 1700125F08                                               | gene | 1700125F08Rik |         |
| 1432461_at   | 0.93422 | eyes absent 4 homolog (Drosophila)                                  |      |               | Eya4    |
| 1432462_a_at | 1.00257 | "cofactor required for Sp1 transcriptional activation, subunit 8"   |      |               | Crsp8   |
| 1432463_at   | 0.95400 | RIKEN cDNA 5730510P18                                               | gene | 5730510P18Rik |         |
| 1432464_a_at | 0.77908 | RIKEN cDNA 2310057J16                                               | gene | 2310057J16Rik |         |
| 1432465_at   | 1.16802 | RIKEN cDNA 4933414I06                                               | gene | 4933414I06Rik |         |
| 1432466_a_at | 1.02139 | apolipoprotein E                                                    |      |               | Apoe    |
| 1432467_at   | 0.92897 | leucine-rich repeats and calponin homology (CH) domain containing 3 |      |               | Lrch3   |
| 1432468_at   | 1.12778 | lipocalin 9                                                         |      |               | Lcn9    |
| 1432469_at   | 0.90449 | RIKEN cDNA 1700094E07                                               | gene | 1700094E07Rik |         |
| 1432470_at   | 0.91256 | RIKEN cDNA 1700016A09                                               | gene | 1700016A09Rik |         |
| 1432471_at   | 0.85506 | RIKEN cDNA 5730419I09                                               | gene | 5730419I09Rik |         |
| 1432472_a_at | 1.00784 | methylcrotonoyl-Coenzyme A carboxylase 2 (beta)                     |      |               | Mccc2   |
| 1432473_a_at | 1.11332 | "ATP-binding cassette, sub-family A (ABC1), member 14"              |      |               | Abca14  |
| 1432474_a_at | 0.99357 | keratinocyte associated protein 3                                   |      |               | Krtcap3 |
| 1432475_at   | 0.89924 | RIKEN cDNA 1700014B07                                               | gene | 1700014B07Rik |         |
| 1432476_at   | 1.13743 | RIKEN cDNA 1700040F17                                               | gene | 1700040F17Rik |         |
| 1432477_at   | 0.83296 | RIKEN cDNA 4930412D23                                               | gene | 4930412D23Rik |         |
| 1432478_a_at | 1.01897 | IBR domain containing 3                                             |      |               | Ibrdc3  |
| 1432479_at   | 1.00108 | "Mus musculus, clone IMAGE:6772209, mRNA"                           |      |               | ---     |
| 1432480_a_at | 1.00316 | cyclin N-terminal domain containing 1                               |      |               | Cntd1   |
| 1432481_a_at | 0.89514 | lysozyme-like 6                                                     |      |               | Lyzl6   |
| 1432482_at   | 0.91233 | lysozyme-like 6                                                     |      |               | Lyzl6   |
| 1432483_at   | 0.93065 | RIKEN cDNA 1700124K17                                               | gene | 1700124K17Rik |         |
| 1432484_at   | 0.88645 | RIKEN cDNA 2310061C15                                               | gene | 2310061C15Rik |         |
| 1432485_at   | 0.92185 | RIKEN cDNA 3110057O12                                               | gene | 3110057O12Rik |         |

1432486\_a\_at 0.89696 testicular serine protease 2 *Tesp2*  
1432487\_at 0.86702 RIKEN cDNA 4930405H06 gene 4930405H06Rik  
1432488\_a\_at 1.11986 "splicing factor 3a, subunit 3 /// similar to splicing factor 3a, subunit 3 (predicted)" *Sf3a3* /// LOC626830  
1432489\_a\_at 1.35178 RIKEN cDNA 2410187C16 gene 2410187C16Rik  
1432490\_a\_at 0.94626 phosphodiesterase 10A *Pde10a*  
1432491\_at 0.93672 protocadherin 8 *Pcdh8*  
1432492\_a\_at 0.95257 "3-hydroxyanthranilate 3,4-dioxygenase" *Haa0*  
1432493\_at 1.10401 RIKEN cDNA 1700020M10 gene 1700020M10Rik  
1432494\_a\_at 0.99457 RIKEN cDNA 1700019E19 gene 1700019E19Rik  
1432495\_at 1.16307 SRY-box containing gene 7 *Sox7*  
1432496\_at 0.94691 RIKEN cDNA 1700122O11 gene 1700122O11Rik  
1432497\_at 0.95186 coiled-coil domain containing 93 *Ccdc93*  
1432498\_at 1.01632 RIKEN cDNA 1700020C07 gene 1700020C07Rik  
1432499\_a\_at 1.05041 "ubiquitination factor E4B, UFD2 homolog (*S. cerevisiae*)" *Ube4b*  
1432500\_at 0.98316 RIKEN cDNA 2410006F04 gene 2410006F04Rik  
1432501\_at 0.99394 RIKEN cDNA 1700092E16 gene 1700092E16Rik  
1432502\_at 1.21026 RIKEN cDNA 1700028N14 gene 1700028N14Rik  
1432503\_a\_at 1.03131 phosducin-like 2 *Pdcl2*  
1432504\_at 0.94363 RIKEN cDNA 1700106N22 gene 1700106N22Rik  
1432505\_at 0.92315 RIKEN cDNA 1700009J07 gene 1700009J07Rik  
1432506\_at 0.94230 transmembrane protein 86B *Tmem86b*  
1432507\_at 0.80575 RIKEN cDNA B430319H21 gene B430319H21Rik  
1432508\_at 0.99252 RIKEN cDNA 1700113I22 gene 1700113I22Rik  
1432509\_at 0.94271 RIKEN cDNA 5033430I15 gene 5033430I15Rik  
1432510\_at 1.04844 RIKEN cDNA 4930512M02 gene 4930512M02Rik  
1432511\_s\_at 1.02218 centrosomal protein 27 *Cep27*  
1432512\_at 1.03318 RIKEN cDNA 4931433A01 gene 4931433A01Rik  
1432513\_a\_at 0.97300 RIKEN cDNA 1700001C02 gene 1700001C02Rik  
1432514\_at 1.08413 RIKEN cDNA 1700066J24 gene 1700066J24Rik  
1432515\_at 1.05541 RIKEN cDNA 2410124H12 gene 2410124H12Rik  
1432516\_at 0.96471 RIKEN cDNA 4930447F04 gene 4930447F04Rik  
1432517\_a\_at 0.93493 nicotinamide N-methyltransferase *Nnmt*  
1432518\_at 1.02956 RIKEN cDNA 4930430J20 gene 4930430J20Rik  
1432519\_at 0.97329 RIKEN cDNA 1810059H22 gene 1810059H22Rik  
1432520\_at 0.85288 immunoglobulin heavy chain (J558 family) *Igh-VJ558*  
1432521\_at 1.01018 matrix-remodelling associated 8 *Mxra8*  
1432522\_s\_at 1.03278 coiled-coil domain containing 46 *Ccdc46*  
1432523\_at 0.85340 homeodomain interacting protein kinase 2 *Hipk2*  
1432524\_at 1.01635 RIKEN cDNA 4930550G17 gene 4930550G17Rik  
1432525\_at 1.09351 RIKEN cDNA 1700001C02 gene 1700001C02Rik  
1432526\_a\_at 1.00673 "SNF8, ESCRT-II complex subunit, homolog (*S. cerevisiae*)" *Snf8*  
1432527\_at 0.90197 RIKEN cDNA 1700108M19 gene 1700108M19Rik

|              |         |                                                                  |                                           |               |
|--------------|---------|------------------------------------------------------------------|-------------------------------------------|---------------|
| 1432528_at   | 1.01522 | RIKEN cDNA 1700021P04 gene                                       | 1700021P04Rik                             |               |
| 1432529_at   | 0.87161 | "bol, boule-like (Drosophila)" Boll                              |                                           |               |
| 1432530_s_at | 0.92439 | "bol, boule-like (Drosophila)" Boll                              |                                           |               |
| 1432531_at   | 1.11495 | RIKEN cDNA 9230104L09 gene                                       | 9230104L09Rik                             |               |
| 1432532_at   | 0.98230 | RIKEN cDNA 0610025J13 gene                                       | 0610025J13Rik                             |               |
| 1432533_a_at | 0.84567 | "solute carrier family 35 (UDP-galactose transporter), member 2" |                                           | Slc35a2       |
| 1432534_at   | 1.05547 | RIKEN cDNA 3300002I08 gene                                       | 3300002I08Rik                             |               |
| 1432535_at   | 1.10346 | RIKEN cDNA 5530400C23 gene                                       | 5530400C23Rik                             |               |
| 1432536_at   | 0.90262 | RIKEN cDNA 1700055M20 gene                                       | 1700055M20Rik                             |               |
| 1432537_at   | 0.95145 | RIKEN cDNA 4930465A12 gene                                       | 4930465A12Rik                             |               |
| 1432538_a_at | 0.96390 | replication factor C (activator 1) 3                             | Rfc3                                      |               |
| 1432539_a_at | 0.99678 | nucleoporin 54                                                   | Nup54                                     |               |
| 1432540_at   | 0.90030 | RIKEN cDNA 5430433J05 gene                                       | 5430433J05Rik                             |               |
| 1432541_at   | 1.03152 | RIKEN cDNA 4930408O17 gene                                       | 4930408O17Rik                             |               |
| 1432542_at   | 0.97925 | RIKEN cDNA 2810474C18 gene                                       | 2810474C18Rik                             |               |
| 1432543_a_at | 1.00251 | Kruppel-like factor 13                                           | Klf13                                     |               |
| 1432544_at   | 0.99423 | RIKEN cDNA 4930449E01 gene                                       | 4930449E01Rik                             |               |
| 1432545_at   | 0.93675 | DC-STAMP domain containing 1                                     | Dcst1                                     |               |
| 1432546_at   | 1.01574 | RIKEN cDNA 4930529I22 gene                                       | 4930529I22Rik                             |               |
| 1432547_at   | 0.98127 | RIKEN cDNA C030005H24 gene                                       | C030005H24Rik                             |               |
| 1432548_at   | 0.98474 | "poly (ADP-ribose) polymerase family, member 14"                 |                                           | Parp14        |
| 1432549_s_at | 0.89421 | RIKEN cDNA 1700112M01 gene                                       | 1700112M01Rik                             |               |
| 1432550_at   | 0.99614 | RIKEN cDNA 4930572D21 gene                                       | 4930572D21Rik                             |               |
| 1432551_at   | 1.03212 | hypothetical LOC73317                                            | LOC73317                                  |               |
| 1432552_at   | 1.00122 | transmembrane protein 89                                         | Tmem89                                    |               |
| 1432553_at   | 0.96442 | RIKEN cDNA 1700069L16 gene                                       | 1700069L16Rik                             |               |
| 1432554_at   | 1.11987 | RIKEN cDNA 2310040G07 gene                                       | 2310040G07Rik                             |               |
| 1432555_at   | 0.88846 | whirlin                                                          | Whrn                                      |               |
| 1432556_a_at | 0.85165 | RIKEN cDNA 3100002J23 gene                                       | 3100002J23Rik                             |               |
| 1432557_at   | 0.87995 | RIKEN cDNA 1700045I11 gene                                       | /// similar to RIKEN cDNA 1700045I11 gene | 1700045I11Rik |
| 1432558_a_at | 0.90378 | "myelin and lymphocyte protein, T-cell differentiation protein"  | Mal                                       |               |
| 1432559_at   | 0.89798 | RIKEN cDNA 2210409D07 gene                                       | 2210409D07Rik                             |               |
| 1432560_at   | 1.04464 | RIKEN cDNA 1700127D06 gene                                       | 1700127D06Rik                             |               |
| 1432561_at   | 0.99148 | RIKEN cDNA 4930569F06 gene                                       | 4930569F06Rik                             |               |
| 1432562_at   | 0.91221 | RIKEN cDNA 1110006G14 gene                                       | 1110006G14Rik                             |               |
| 1432563_at   | 1.09915 | RIKEN cDNA 1700116B05 gene                                       | 1700116B05Rik                             |               |
| 1432564_at   | 1.03537 | RIKEN cDNA 1700066C05 gene                                       | 1700066C05Rik                             |               |
| 1432565_at   | 1.10003 | ---                                                              | ---                                       |               |
| 1432566_at   | 0.99146 | RIKEN cDNA 1700129I15 gene                                       | 1700129I15Rik                             |               |
| 1432567_at   | 1.15432 | RIKEN cDNA A430105D02 gene                                       | A430105D02Rik                             |               |
| 1432568_at   | 0.97164 | RIKEN cDNA 1700121K02 gene                                       | 1700121K02Rik                             |               |
| 1432569_at   | 0.82706 | RIKEN cDNA 1700121K02 gene                                       | 1700121K02Rik                             |               |

|            |         |                                              |        |               |
|------------|---------|----------------------------------------------|--------|---------------|
| 1432570_at | 0.94908 | RIKEN cDNA 6030458E02                        | gene   | 6030458E02Rik |
| 1432571_at | 1.03023 | ---                                          | ---    |               |
| 1432572_at | 1.16884 | RIKEN cDNA 4931406H21                        | gene   | 4931406H21Rik |
| 1432573_at | 1.09251 | RIKEN cDNA 4930506C02                        | gene   | 4930506C02Rik |
| 1432574_at | 0.95603 | RIKEN cDNA 4930548F15                        | gene   | 4930548F15Rik |
| 1432575_at | 1.05936 | RIKEN cDNA 4930548F15                        | gene   | 4930548F15Rik |
| 1432576_at | 0.95927 | RIKEN cDNA 1700084C06                        | gene   | 1700084C06Rik |
| 1432577_at | 0.91557 | ---                                          | ---    |               |
| 1432578_at | 1.07930 | RIKEN cDNA 4933440H19                        | gene   | 4933440H19Rik |
| 1432579_at | 1.14971 | radial spokehead-like 2A                     | Rshl2a |               |
| 1432580_at | 1.03185 | radial spokehead-like 2A                     | Rshl2a |               |
| 1432581_at | 1.07264 | RIKEN cDNA 3110054G05                        | gene   | 3110054G05Rik |
| 1432582_at | 1.08807 | RIKEN cDNA 3110054G05                        | gene   | 3110054G05Rik |
| 1432583_at | 0.96910 | RIKEN cDNA 2900042E19                        | gene   | 2900042E19Rik |
| 1432584_at | 1.03466 | RIKEN cDNA 1110004M10                        | gene   | 1110004M10Rik |
| 1432585_at | 0.92757 | RIKEN cDNA 4931428A05                        | gene   | 4931428A05Rik |
| 1432586_at | 1.00060 | RIKEN cDNA 5730596P11                        | gene   | 5730596P11Rik |
| 1432587_at | 0.99994 | RIKEN cDNA 5730596P11                        | gene   | 5730596P11Rik |
| 1432588_at | 1.10463 | RIKEN cDNA 5830468K08                        | gene   | 5830468K08Rik |
| 1432589_at | 0.80327 | ---                                          | ---    |               |
| 1432590_at | 1.04127 | RIKEN cDNA 4930573O21                        | gene   | 4930573O21Rik |
| 1432591_at | 1.01554 | pregnancy-associated plasma protein A        | Pappa  |               |
| 1432592_at | 1.00044 | pregnancy-associated plasma protein A        | Pappa  |               |
| 1432593_at | 0.92538 | RIKEN cDNA 4933428P19                        | gene   | 4933428P19Rik |
| 1432594_at | 0.88449 | RIKEN cDNA 4933413I22                        | gene   | 4933413I22Rik |
| 1432595_at | 0.93853 | ---                                          | ---    |               |
| 1432596_at | 1.03336 | RIKEN cDNA 4930599N24                        | gene   | 4930599N24Rik |
| 1432597_at | 0.86197 | RIKEN cDNA 4930599N24                        | gene   | 4930599N24Rik |
| 1432598_at | 0.85573 | germ cell-less homolog 1 (Drosophila)        | Gmcl1  |               |
| 1432599_at | 1.21681 | RIKEN cDNA 2610301H18                        | gene   | 2610301H18Rik |
| 1432600_at | 1.04976 | RIKEN cDNA 2310061A09                        | gene   | 2310061A09Rik |
| 1432601_at | 1.05351 | myeloid/lymphoid or mixed-lineage leukemia 5 | Mll5   |               |
| 1432602_at | 0.92470 | ---                                          | ---    |               |
| 1432603_at | 0.95603 | nuclear receptor interacting protein 1       | Nrip1  |               |
| 1432604_at | 1.05250 | retinoblastoma-like 1 (p107)                 | Rbl1   |               |
| 1432605_at | 0.91705 | ---                                          | ---    |               |
| 1432606_at | 0.97001 | RIKEN cDNA 2610012C04                        | gene   | 2610012C04Rik |
| 1432607_at | 1.05740 | RIKEN cDNA 2610012C04                        | gene   | 2610012C04Rik |
| 1432608_at | 0.87637 | nicotinamide nucleotide transhydrogenase     | Nnt    |               |
| 1432609_at | 1.11333 | ---                                          | ---    |               |
| 1432610_at | 0.96763 | RIKEN cDNA 2900024J01                        | gene   | 2900024J01Rik |
| 1432611_at | 1.02911 | RIKEN cDNA 4932430A15                        | gene   | 4932430A15Rik |
| 1432612_at | 1.05969 | RIKEN cDNA 9030405F24                        | gene   | 9030405F24Rik |

|              |         |                                                                                                                                                                                                                                                       |                                       |
|--------------|---------|-------------------------------------------------------------------------------------------------------------------------------------------------------------------------------------------------------------------------------------------------------|---------------------------------------|
| 1432613_at   | 0.90659 | RIKEN cDNA E130201N16 gene                                                                                                                                                                                                                            | E130201N16Rik                         |
| 1432614_at   | 1.01539 | WD repeat domain 37 Wdr37                                                                                                                                                                                                                             |                                       |
| 1432615_at   | 1.04332 | WD repeat domain 37 Wdr37                                                                                                                                                                                                                             |                                       |
| 1432616_at   | 0.93153 | RIKEN cDNA 4833422B07 gene                                                                                                                                                                                                                            | 4833422B07Rik                         |
| 1432617_at   | 0.87928 | RIKEN cDNA 4933424C09 gene                                                                                                                                                                                                                            | 4933424C09Rik                         |
| 1432618_at   | 1.15146 | RIKEN cDNA 3110037L02 gene                                                                                                                                                                                                                            | 3110037L02Rik                         |
| 1432619_at   | 0.98523 | ---                                                                                                                                                                                                                                                   | ---                                   |
| 1432620_at   | 0.84868 | ---                                                                                                                                                                                                                                                   | ---                                   |
| 1432621_at   | 1.04710 | RIKEN cDNA 5730410E19 gene                                                                                                                                                                                                                            | 5730410E19Rik                         |
| 1432622_a_at | 1.03815 | RIKEN cDNA 4930507D05 gene                                                                                                                                                                                                                            | 4930507D05Rik                         |
| 1432623_at   | 0.94804 | "suppressor of var1, 3-like 1 (S. cerevisiae)"                                                                                                                                                                                                        | Supv311                               |
| 1432624_at   | 1.03148 | RIKEN cDNA 5830487K18 gene                                                                                                                                                                                                                            | 5830487K18Rik                         |
| 1432625_at   | 0.98706 | RIKEN cDNA 5830487K18 gene                                                                                                                                                                                                                            | 5830487K18Rik                         |
| 1432626_at   | 1.23782 | RIKEN cDNA 5730507A11 gene                                                                                                                                                                                                                            | 5730507A11Rik                         |
| 1432627_at   | 1.00927 | RIKEN cDNA 5730507A11 gene                                                                                                                                                                                                                            | 5730507A11Rik                         |
| 1432628_at   | 0.93712 | chromobox homolog 3 (Drosophila HP1 gamma)                                                                                                                                                                                                            | Cbx3                                  |
| 1432629_at   | 0.93017 | ---                                                                                                                                                                                                                                                   | ---                                   |
| 1432630_at   | 0.90092 | "tankyrase, TRF1-interacting ankyrin-related ADP-ribose polymerase"                                                                                                                                                                                   | Tnks                                  |
| 1432631_at   | 0.96051 | RIKEN cDNA 1190002C06 gene                                                                                                                                                                                                                            | 1190002C06Rik                         |
| 1432632_at   | 0.92931 | RIKEN cDNA 9430063H18 gene                                                                                                                                                                                                                            | 9430063H18Rik                         |
| 1432633_at   | 0.90304 | RIKEN cDNA 9430063H18 gene                                                                                                                                                                                                                            | 9430063H18Rik                         |
| 1432634_at   | 1.07718 | RIKEN cDNA 4933429H19 gene                                                                                                                                                                                                                            | 4933429H19Rik                         |
| 1432635_a_at | 0.87978 | translocation protein 1 Tloc1                                                                                                                                                                                                                         |                                       |
| 1432636_at   | 1.05105 | ---                                                                                                                                                                                                                                                   | ---                                   |
| 1432637_at   | 1.06813 | similar to Hippocalcin-like protein 1 (Visinin-like protein 3) (VILIP-3) (Neural visinin-like protein 3) (NVL-3) (NVP-3) /// similar to Hippocalcin-like protein 1 (Visinin-like protein 3) (VILIP-3) (Neural visinin-like protein 3) (NVL-3) (NVP-3) | LOC675539 /// LOC675641               |
| 1432638_at   | 0.93142 | BCL2-associated athanogene 5 Bag5                                                                                                                                                                                                                     |                                       |
| 1432639_at   | 0.95719 | RIKEN cDNA 4633401L03 gene                                                                                                                                                                                                                            | 4633401L03Rik                         |
| 1432640_at   | 0.98837 | RIKEN cDNA 4633401L03 gene                                                                                                                                                                                                                            | 4633401L03Rik                         |
| 1432641_at   | 0.94072 | RIKEN cDNA 5830490A12 gene                                                                                                                                                                                                                            | 5830490A12Rik                         |
| 1432642_at   | 1.09859 | RIKEN cDNA 4933411E06 gene                                                                                                                                                                                                                            | 4933411E06Rik                         |
| 1432643_at   | 0.94903 | RIKEN cDNA 4933411E06 gene                                                                                                                                                                                                                            | 4933411E06Rik                         |
| 1432644_at   | 1.00809 | RIKEN cDNA 6430711C07 gene                                                                                                                                                                                                                            | 6430711C07Rik                         |
| 1432645_at   | 0.91000 | Attractin Atrn                                                                                                                                                                                                                                        |                                       |
| 1432646_a_at | 1.01748 | hypothetical LOC640370 /// hypothetical protein LOC667653 /// hypothetical protein LOC672953                                                                                                                                                          | LOC640370 /// LOC667653 /// LOC672953 |
| 1432647_at   | 0.95424 | epidermal growth factor receptor                                                                                                                                                                                                                      | Egfr                                  |
| 1432648_at   | 0.91974 | RIKEN cDNA 4930466F19 gene                                                                                                                                                                                                                            | 4930466F19Rik                         |
| 1432649_at   | 0.90121 | RIKEN cDNA 3300002A11 gene                                                                                                                                                                                                                            | 3300002A11Rik                         |
| 1432650_at   | 1.08741 | RIKEN cDNA 2510019K15 gene                                                                                                                                                                                                                            | 2510019K15Rik                         |
| 1432651_at   | 1.03747 | RIKEN cDNA 2510019K15 gene                                                                                                                                                                                                                            | 2510019K15Rik                         |
| 1432652_at   | 0.85800 | RIKEN cDNA 1700008H02 gene                                                                                                                                                                                                                            | 1700008H02Rik                         |

|            |         |                                                |        |               |
|------------|---------|------------------------------------------------|--------|---------------|
| 1432653_at | 1.09380 | RIKEN cDNA 1700008H02                          | gene   | 1700008H02Rik |
| 1432654_at | 1.08385 | RIKEN cDNA 5830426C09                          | gene   | 5830426C09Rik |
| 1432655_at | 1.05476 | RIKEN cDNA 3222402N08                          | gene   | 3222402N08Rik |
| 1432656_at | 0.89544 | RIKEN cDNA 3222402N08                          | gene   | 3222402N08Rik |
| 1432657_at | 1.00871 | a disintegrin and metallopeptidase domain 1b   | Adam1b |               |
| 1432658_at | 0.95116 | RIKEN cDNA 2810403D21                          | gene   | 2810403D21Rik |
| 1432659_at | 0.95077 | RIKEN cDNA 4930402H05                          | gene   | 4930402H05Rik |
| 1432660_at | 0.95567 | RIKEN cDNA 5830420C07                          | gene   | 5830420C07Rik |
| 1432661_at | 0.99027 | RIKEN cDNA 0610042E11                          | gene   | 0610042E11Rik |
| 1432662_at | 0.84264 | RIKEN cDNA 0610042E11                          | gene   | 0610042E11Rik |
| 1432663_at | 0.97637 | RIKEN cDNA 1500005C15                          | gene   | 1500005C15Rik |
| 1432664_at | 0.91573 | RIKEN cDNA 4933404M09                          | gene   | 4933404M09Rik |
| 1432665_at | 0.88848 | RIKEN cDNA 2210416J07                          | gene   | 2210416J07Rik |
| 1432666_at | 1.06680 | ---                                            | ---    |               |
| 1432667_at | 0.98604 | RIKEN cDNA 2210411G17                          | gene   | 2210411G17Rik |
| 1432668_at | 0.93783 | RIKEN cDNA 2210411G17                          | gene   | 2210411G17Rik |
| 1432669_at | 1.09780 | RIKEN cDNA 9030420N05                          | gene   | 9030420N05Rik |
| 1432670_at | 0.86808 | RIKEN cDNA 9030420N05                          | gene   | 9030420N05Rik |
| 1432671_at | 0.90707 | RIKEN cDNA 4933407A17                          | gene   | 4933407A17Rik |
| 1432672_at | 0.92159 | RIKEN cDNA 4933407A17                          | gene   | 4933407A17Rik |
| 1432673_at | 1.00657 | RIKEN cDNA 2300010F08                          | gene   | 2300010F08Rik |
| 1432674_at | 1.04805 | RIKEN cDNA 2300010F08                          | gene   | 2300010F08Rik |
| 1432675_at | 0.94125 | midasin homolog (yeast) Mdn1                   |        |               |
| 1432676_at | 1.22246 | ---                                            | ---    |               |
| 1432677_at | 0.90373 | Golgi-specific brefeldin A-resistance factor 1 | Gbf1   |               |
| 1432678_at | 1.01663 | integrin alpha V                               | Itgav  |               |
| 1432679_at | 0.89140 | integrin alpha V                               | Itgav  |               |
| 1432680_at | 1.16647 | RIKEN cDNA 9130009M17                          | gene   | 9130009M17Rik |
| 1432681_at | 0.98506 | RIKEN cDNA 9130009M17                          | gene   | 9130009M17Rik |
| 1432682_at | 1.00320 | RIKEN cDNA 5530400K19                          | gene   | 5530400K19Rik |
| 1432683_at | 1.03575 | RIKEN cDNA 5530400K19                          | gene   | 5530400K19Rik |
| 1432684_at | 1.03563 | RIKEN cDNA 4921521C08                          | gene   | 4921521C08Rik |
| 1432685_at | 1.06315 | MON1 homolog b (yeast) Mon1b                   |        |               |
| 1432686_at | 1.00517 | RIKEN cDNA 4833406M21                          | gene   | 4833406M21Rik |
| 1432687_at | 0.93560 | RIKEN cDNA 4833406M21                          | gene   | 4833406M21Rik |
| 1432688_at | 0.94998 | RIKEN cDNA 4631422I05                          | gene   | 4631422I05Rik |
| 1432689_at | 0.97360 | RIKEN cDNA 4631422I05                          | gene   | 4631422I05Rik |
| 1432690_at | 0.99206 | RIKEN cDNA 9030407C09                          | gene   | 9030407C09Rik |
| 1432691_at | 0.94144 | RIKEN cDNA 9030407C09                          | gene   | 9030407C09Rik |
| 1432692_at | 0.99882 | RIKEN cDNA 4930517G19                          | gene   | 4930517G19Rik |
| 1432693_at | 1.00623 | RIKEN cDNA 4930517G19                          | gene   | 4930517G19Rik |
| 1432694_at | 1.10929 | RIKEN cDNA 4921527H02                          | gene   | 4921527H02Rik |
| 1432695_at | 0.97375 | RIKEN cDNA 4921527H02                          | gene   | 4921527H02Rik |

|            |         |                                                                                                                                                                                                                                                                                                                                                                                                                                                                                                                                                                                                                                                                                                                                                                                                                                                                        |      |                |
|------------|---------|------------------------------------------------------------------------------------------------------------------------------------------------------------------------------------------------------------------------------------------------------------------------------------------------------------------------------------------------------------------------------------------------------------------------------------------------------------------------------------------------------------------------------------------------------------------------------------------------------------------------------------------------------------------------------------------------------------------------------------------------------------------------------------------------------------------------------------------------------------------------|------|----------------|
| 1432696_at | 0.91522 | RIKEN cDNA 5830431M20                                                                                                                                                                                                                                                                                                                                                                                                                                                                                                                                                                                                                                                                                                                                                                                                                                                  | gene | 5830431M20Rik  |
| 1432697_at | 1.09575 | RIKEN cDNA 5830431M20                                                                                                                                                                                                                                                                                                                                                                                                                                                                                                                                                                                                                                                                                                                                                                                                                                                  | gene | 5830431M20Rik  |
| 1432698_at | 0.99401 | RIKEN cDNA 2900024I21                                                                                                                                                                                                                                                                                                                                                                                                                                                                                                                                                                                                                                                                                                                                                                                                                                                  | gene | 2900024I21Rik  |
| 1432699_at | 1.02784 | RIKEN cDNA 2900024I21                                                                                                                                                                                                                                                                                                                                                                                                                                                                                                                                                                                                                                                                                                                                                                                                                                                  | gene | 2900024I21Rik  |
| 1432700_at | 0.98903 | RIKEN cDNA 2810047J09                                                                                                                                                                                                                                                                                                                                                                                                                                                                                                                                                                                                                                                                                                                                                                                                                                                  | gene | 2810047J09Rik  |
| 1432701_at | 1.11008 | RIKEN cDNA 2810403G07                                                                                                                                                                                                                                                                                                                                                                                                                                                                                                                                                                                                                                                                                                                                                                                                                                                  | gene | 2810403G07Rik  |
| 1432702_at | 1.03847 | RIKEN cDNA 2810403G07                                                                                                                                                                                                                                                                                                                                                                                                                                                                                                                                                                                                                                                                                                                                                                                                                                                  | gene | 2810403G07Rik  |
| 1432703_at | 1.15265 | RIKEN cDNA 5730405A17                                                                                                                                                                                                                                                                                                                                                                                                                                                                                                                                                                                                                                                                                                                                                                                                                                                  | gene | 5730405A17Rik  |
| 1432704_at | 0.89754 | RIKEN cDNA 5730405A17                                                                                                                                                                                                                                                                                                                                                                                                                                                                                                                                                                                                                                                                                                                                                                                                                                                  | gene | 5730405A17Rik  |
| 1432705_at | 0.95233 | RIKEN cDNA 5330428N10                                                                                                                                                                                                                                                                                                                                                                                                                                                                                                                                                                                                                                                                                                                                                                                                                                                  | gene | 5330428N10Rik  |
| 1432706_at | 0.93841 | RIKEN cDNA 5330428N10                                                                                                                                                                                                                                                                                                                                                                                                                                                                                                                                                                                                                                                                                                                                                                                                                                                  | gene | 5330428N10Rik  |
| 1432707_at | 0.98619 | 3-phosphoglycerate dehydrogenase /// similar to 3-phosphoglycerate dehydrogenase Phgdh /// LOC382931 /// LOC384524 /// LOC385344 /// LOC547171 /// LOC627427 /// LOC666422 /// LOC666875 /// LOC668771 /// LOC669671 /// LOC669985 /// LOC670155 /// LOC670187 /// LOC671102 /// LOC671972 /// LOC673015 /// LOC675010 |      |                |
| 1432708_at | 0.92851 | ---                                                                                                                                                                                                                                                                                                                                                                                                                                                                                                                                                                                                                                                                                                                                                                                                                                                                    | ---  |                |
| 1432709_at | 1.12874 | RIKEN cDNA 4930505O19                                                                                                                                                                                                                                                                                                                                                                                                                                                                                                                                                                                                                                                                                                                                                                                                                                                  | gene | 4930505O19Rik  |
| 1432710_at | 0.96130 | RIKEN cDNA 4930505O19                                                                                                                                                                                                                                                                                                                                                                                                                                                                                                                                                                                                                                                                                                                                                                                                                                                  | gene | 4930505O19Rik  |
| 1432711_at | 1.08794 | RIKEN cDNA 4933425M03                                                                                                                                                                                                                                                                                                                                                                                                                                                                                                                                                                                                                                                                                                                                                                                                                                                  | gene | 4933425M03Rik  |
| 1432712_at | 1.07415 | RIKEN cDNA 4933425M03                                                                                                                                                                                                                                                                                                                                                                                                                                                                                                                                                                                                                                                                                                                                                                                                                                                  | gene | 4933425M03Rik  |
| 1432713_at | 0.94192 | RIKEN cDNA 6430709C05                                                                                                                                                                                                                                                                                                                                                                                                                                                                                                                                                                                                                                                                                                                                                                                                                                                  | gene | 6430709C05Rik  |
| 1432714_at | 0.94613 | RIKEN cDNA 6430709C05                                                                                                                                                                                                                                                                                                                                                                                                                                                                                                                                                                                                                                                                                                                                                                                                                                                  | gene | 6430709C05Rik  |
| 1432715_at | 0.94227 | "leucine rich repeat protein 1, neuronal"                                                                                                                                                                                                                                                                                                                                                                                                                                                                                                                                                                                                                                                                                                                                                                                                                              |      | Lrrn1          |
| 1432716_at | 0.91161 | "leucine rich repeat protein 1, neuronal"                                                                                                                                                                                                                                                                                                                                                                                                                                                                                                                                                                                                                                                                                                                                                                                                                              |      | Lrrn1          |
| 1432717_at | 0.96478 | RIKEN cDNA 1810015A16                                                                                                                                                                                                                                                                                                                                                                                                                                                                                                                                                                                                                                                                                                                                                                                                                                                  | gene | 1810015A16Rik  |
| 1432718_at | 1.14264 | ---                                                                                                                                                                                                                                                                                                                                                                                                                                                                                                                                                                                                                                                                                                                                                                                                                                                                    | ---  |                |
| 1432719_at | 1.23566 | RIKEN cDNA 4833412K13                                                                                                                                                                                                                                                                                                                                                                                                                                                                                                                                                                                                                                                                                                                                                                                                                                                  | gene | 4833412K13Rik  |
| 1432720_at | 0.91214 | RIKEN cDNA 4833412K13                                                                                                                                                                                                                                                                                                                                                                                                                                                                                                                                                                                                                                                                                                                                                                                                                                                  | gene | 4833412K13Rik  |
| 1432721_at | 0.87701 | RIKEN cDNA 5830424K16                                                                                                                                                                                                                                                                                                                                                                                                                                                                                                                                                                                                                                                                                                                                                                                                                                                  | gene | 5830424K16Rik  |
| 1432722_at | 0.87542 | RIKEN cDNA 4933408K01                                                                                                                                                                                                                                                                                                                                                                                                                                                                                                                                                                                                                                                                                                                                                                                                                                                  | gene | 4933408K01Rik  |
| 1432723_at | 1.04477 | RIKEN cDNA 4933408K01                                                                                                                                                                                                                                                                                                                                                                                                                                                                                                                                                                                                                                                                                                                                                                                                                                                  | gene | 4933408K01Rik  |
| 1432724_at | 0.98208 | RIKEN cDNA 4930445G23                                                                                                                                                                                                                                                                                                                                                                                                                                                                                                                                                                                                                                                                                                                                                                                                                                                  | gene | 4930445G23Rik  |
| 1432725_at | 0.96952 | RIKEN cDNA 4930445G23                                                                                                                                                                                                                                                                                                                                                                                                                                                                                                                                                                                                                                                                                                                                                                                                                                                  | gene | 4930445G23Rik  |
| 1432726_at | 1.06815 | "proteasome (prosome, macropain) 26S subunit, non-ATPase, 11"                                                                                                                                                                                                                                                                                                                                                                                                                                                                                                                                                                                                                                                                                                                                                                                                          |      | Psm11          |
| 1432727_at | 1.10022 | "proteasome (prosome, macropain) 26S subunit, non-ATPase, 11"                                                                                                                                                                                                                                                                                                                                                                                                                                                                                                                                                                                                                                                                                                                                                                                                          |      | /// similar to |



26S proteasome non-ATPase regulatory subunit 11 (26S proteasome regulatory subunit S9) (26S proteasome regulatory subunit p44.5) /// similar to 26S proteasome non-ATPase regulatory subunit 11 (26S proteasome regulatory subunit S9) (26S proteasome regulatory subunit p44.5)" Psm11 /// LOC627316 /// LOC671671

|            |         |                                                         |       |               |
|------------|---------|---------------------------------------------------------|-------|---------------|
| 1432728_at | 0.94247 | RIKEN cDNA 5830433D23                                   | gene  | 5830433D23Rik |
| 1432729_at | 1.04150 | RIKEN cDNA 5830415G21                                   | gene  | 5830415G21Rik |
| 1432730_at | 0.93603 | RIKEN cDNA 5830415G21                                   | gene  | 5830415G21Rik |
| 1432731_at | 0.86481 | RIKEN cDNA 5830437K03                                   | gene  | 5830437K03Rik |
| 1432732_at | 0.98500 | ---                                                     | ---   |               |
| 1432733_at | 1.01626 | RIKEN cDNA 4933402E15                                   | gene  | 4933402E15Rik |
| 1432734_at | 1.10008 | RIKEN cDNA 4933402E15                                   | gene  | 4933402E15Rik |
| 1432735_at | 0.86538 | RIKEN cDNA 1700017H01                                   | gene  | 1700017H01Rik |
| 1432736_at | 1.02365 | RIKEN cDNA 4933430H06                                   | gene  | 4933430H06Rik |
| 1432737_at | 0.95133 | RIKEN cDNA 2810026P18                                   | gene  | 2810026P18Rik |
| 1432738_at | 0.88558 | RIKEN cDNA 2810026P18                                   | gene  | 2810026P18Rik |
| 1432739_at | 0.89729 | RIKEN cDNA 2900060K15                                   | gene  | 2900060K15Rik |
| 1432740_at | 1.01084 | RIKEN cDNA 4833420L08                                   | gene  | 4833420L08Rik |
| 1432741_at | 1.08192 | RIKEN cDNA 9530071P10                                   | gene  | 9530071P10Rik |
| 1432742_at | 1.05984 | ---                                                     | ---   |               |
| 1432743_at | 0.99728 | RIKEN cDNA 4930443G03                                   | gene  | 4930443G03Rik |
| 1432744_at | 0.88964 | RIKEN cDNA 4930443G03                                   | gene  | 4930443G03Rik |
| 1432745_at | 1.17433 | RIKEN cDNA 9430092D12                                   | gene  | 9430092D12Rik |
| 1432746_at | 0.98040 | RIKEN cDNA 6030442H21                                   | gene  | 6030442H21Rik |
| 1432747_at | 1.01876 | RIKEN cDNA 4933403J19                                   | gene  | 4933403J19Rik |
| 1432748_at | 0.94867 | RIKEN cDNA 4933403J19                                   | gene  | 4933403J19Rik |
| 1432749_at | 0.78688 | ---                                                     | ---   |               |
| 1432750_at | 0.97177 | RIKEN cDNA 2810409C01                                   | gene  | 2810409C01Rik |
| 1432751_at | 1.00056 | RIKEN cDNA 4930403O18                                   | gene  | 4930403O18Rik |
| 1432752_at | 1.05279 | RIKEN cDNA 4930403O18                                   | gene  | 4930403O18Rik |
| 1432753_at | 0.95487 | RIKEN cDNA 9130214F15                                   | gene  | 9130214F15Rik |
| 1432754_at | 1.01040 | ---                                                     | ---   |               |
| 1432755_at | 1.06859 | RIKEN cDNA 2210409O19                                   | gene  | 2210409O19Rik |
| 1432756_at | 0.97383 | RIKEN cDNA 2210409O19                                   | gene  | 2210409O19Rik |
| 1432757_at | 2.63396 | RIKEN cDNA 2900011L18                                   | gene  | 2900011L18Rik |
| 1432758_at | 0.98232 | RIKEN cDNA 2900011L18                                   | gene  | 2900011L18Rik |
| 1432759_at | 1.27486 | RIKEN cDNA 6330571C24                                   | gene  | 6330571C24Rik |
| 1432760_at | 1.00223 | BAT2 domain containing 1                                | Bat2d |               |
| 1432761_at | 0.94151 | RIKEN cDNA 4930551I15                                   | gene  | 4930551I15Rik |
| 1432762_at | 0.96507 | RIKEN cDNA 9530025H10                                   | gene  | 9530025H10Rik |
| 1432763_at | 0.84001 | proline-rich Gla (G-carboxyglutamic acid) polypeptide 2 | Prrg2 |               |
| 1432764_at | 0.94104 | RIKEN cDNA 4933404I11                                   | gene  | 4933404I11Rik |
| 1432765_at | 1.00937 | RIKEN cDNA C030007D22                                   | gene  | C030007D22Rik |
| 1432766_at | 0.90313 | RIKEN cDNA E130112B07                                   | gene  | E130112B07Rik |

|            |         |                                                                 |      |               |
|------------|---------|-----------------------------------------------------------------|------|---------------|
| 1432767_at | 0.93664 | RIKEN cDNA E130112B07                                           | gene | E130112B07Rik |
| 1432768_at | 0.99135 | RIKEN cDNA 6430710M23                                           | gene | 6430710M23Rik |
| 1432769_at | 0.95406 | "solute carrier family 44, member 1"                            |      | Slc44a1       |
| 1432770_at | 0.95546 | RIKEN cDNA 0610040A22                                           | gene | 0610040A22Rik |
| 1432771_at | 1.03766 | "solute carrier family 9 (sodium/hydrogen exchanger), member 3" |      | Slc9a3        |
| 1432772_at | 1.03530 | RIKEN cDNA 1700081H04                                           | gene | 1700081H04Rik |
| 1432773_at | 0.97648 | RIKEN cDNA 2610105M22                                           | gene | 2610105M22Rik |
| 1432774_at | 0.97449 | RIKEN cDNA 2610105M22                                           | gene | 2610105M22Rik |
| 1432775_at | 0.95961 | RIKEN cDNA 9430087J23                                           | gene | 9430087J23Rik |
| 1432776_at | 0.89598 | RIKEN cDNA 9430087J23                                           | gene | 9430087J23Rik |
| 1432777_at | 0.88414 | RIKEN cDNA 9430032J07                                           | gene | 9430032J07Rik |
| 1432778_at | 0.91083 | ---                                                             | ---  |               |
| 1432779_at | 1.00675 | RIKEN cDNA 1700037N05                                           | gene | 1700037N05Rik |
| 1432780_at | 0.98297 | ---                                                             | ---  |               |
| 1432781_at | 0.89403 | PDZ domain containing 6                                         |      | Pdzd6         |
| 1432782_at | 0.96068 | RIKEN cDNA 4933435C09                                           | gene | 4933435C09Rik |
| 1432783_at | 1.11148 | RIKEN cDNA 4930556A17                                           | gene | 4930556A17Rik |
| 1432784_at | 0.84384 | RIKEN cDNA 4930556A17                                           | gene | 4930556A17Rik |
| 1432785_at | 0.96053 | RIKEN cDNA A930028O11                                           | gene | A930028O11Rik |
| 1432786_at | 1.09789 | RIKEN cDNA 4833420D23                                           | gene | 4833420D23Rik |
| 1432787_at | 1.03046 | RIKEN cDNA 6720420G18                                           | gene | 6720420G18Rik |
| 1432788_at | 0.97936 | RIKEN cDNA 6720420G18                                           | gene | 6720420G18Rik |
| 1432789_at | 0.96659 | RIKEN cDNA 8030476L19                                           | gene | 8030476L19Rik |
| 1432790_at | 1.14665 | RIKEN cDNA 9030218A15                                           | gene | 9030218A15Rik |
| 1432791_at | 0.97357 | RIKEN cDNA 9030218A15                                           | gene | 9030218A15Rik |
| 1432792_at | 1.04190 | RIKEN cDNA 4930401B11                                           | gene | 4930401B11Rik |
| 1432793_at | 0.87752 | RIKEN cDNA 4930401B11                                           | gene | 4930401B11Rik |
| 1432794_at | 1.07891 | RIKEN cDNA 2310058F05                                           | gene | 2310058F05Rik |
| 1432795_at | 1.05850 | RIKEN cDNA 2310058F05                                           | gene | 2310058F05Rik |
| 1432796_at | 1.08847 | RIKEN cDNA 3110067C02                                           | gene | 3110067C02Rik |
| 1432797_at | 0.84768 | RIKEN cDNA 2900060N12                                           | gene | 2900060N12Rik |
| 1432798_at | 1.05547 | RIKEN cDNA 9530023I19                                           | gene | 9530023I19Rik |
| 1432799_at | 0.92777 | RIKEN cDNA C030011G24                                           | gene | C030011G24Rik |
| 1432800_at | 0.93308 | RIKEN cDNA C030011G24                                           | gene | C030011G24Rik |
| 1432801_at | 1.11535 | RIKEN cDNA 4930418C01                                           | gene | 4930418C01Rik |
| 1432802_at | 1.00103 | RIKEN cDNA 9230106L01                                           | gene | 9230106L01Rik |
| 1432803_at | 1.02124 | RIKEN cDNA A230101C19                                           | gene | A230101C19Rik |
| 1432804_at | 1.02412 | RIKEN cDNA A230101C19                                           | gene | A230101C19Rik |
| 1432805_at | 0.93501 | RIKEN cDNA 8030431A06                                           | gene | 8030431A06Rik |
| 1432806_at | 0.89067 | RIKEN cDNA 9430099H24                                           | gene | 9430099H24Rik |
| 1432807_at | 0.95421 | RIKEN cDNA 5830426K05                                           | gene | 5830426K05Rik |
| 1432808_at | 1.05212 | RIKEN cDNA 5830426K05                                           | gene | 5830426K05Rik |
| 1432809_at | 1.01234 | RIKEN cDNA 1700113P08                                           | gene | 1700113P08Rik |

|              |         |                                                                                                                                              |                                                |
|--------------|---------|----------------------------------------------------------------------------------------------------------------------------------------------|------------------------------------------------|
| 1432810_at   | 1.00601 | tetratricopeptide repeat domain 32                                                                                                           | Ttc32                                          |
| 1432811_at   | 0.97299 | ---                                                                                                                                          | ---                                            |
| 1432812_at   | 1.09415 | RIKEN cDNA 4930554P06 gene                                                                                                                   | 4930554P06Rik                                  |
| 1432813_at   | 0.99796 | RIKEN cDNA 2900064F13 gene                                                                                                                   | 2900064F13Rik                                  |
| 1432814_at   | 0.99392 | RIKEN cDNA 2900064F13 gene                                                                                                                   | 2900064F13Rik                                  |
| 1432815_at   | 0.91030 | RIKEN cDNA 4833419A21 gene                                                                                                                   | 4833419A21Rik                                  |
| 1432816_s_at | 1.06539 | RIKEN cDNA 4930413G21 gene                                                                                                                   | 4930413G21Rik                                  |
| 1432817_x_at | 0.81393 | RIKEN cDNA 4930413G21 gene                                                                                                                   | 4930413G21Rik                                  |
| 1432818_at   | 0.92603 | RIKEN cDNA 1190002C06 gene                                                                                                                   | 1190002C06Rik                                  |
| 1432819_at   | 0.90628 | RIKEN cDNA 1190002C06 gene                                                                                                                   | 1190002C06Rik                                  |
| 1432820_at   | 1.09697 | "proteasome (prosome, macropain) 26S subunit, non-ATPase, 7"                                                                                 | Psmc7                                          |
| 1432821_at   | 1.01643 | "nuclear factor of activated T-cells, cytoplasmic, calcineurin-dependent 4"                                                                  | Nfatc4                                         |
| 1432822_at   | 0.97484 | RIKEN cDNA 4930557B21 gene                                                                                                                   | 4930557B21Rik                                  |
| 1432823_at   | 1.01651 | synaptophysin-like 2                                                                                                                         | Sypl2                                          |
| 1432824_at   | 0.96050 | RIKEN cDNA 2900018N21 gene                                                                                                                   | 2900018N21Rik                                  |
| 1432825_at   | 0.97895 | RIKEN cDNA 2900018N21 gene                                                                                                                   | 2900018N21Rik                                  |
| 1432826_a_at | 0.91302 | CD80 antigen                                                                                                                                 | Cd80                                           |
| 1432827_x_at | 0.89489 | ubiquitin C                                                                                                                                  | Ubc                                            |
| 1432828_at   | 1.17760 | ---                                                                                                                                          | ---                                            |
| 1432829_at   | 0.95250 | "enolase 1, alpha non-neuron /// similar to enolase 1, alpha non-neuron /// similar to T21B10.2b /// similar to enolase 1, alpha non-neuron" | Eno1 /// LOC433182 /// LOC671462 /// LOC674877 |
| 1432830_at   | 1.05166 | RIKEN cDNA 6230424H07 gene                                                                                                                   | 6230424H07Rik                                  |
| 1432831_at   | 1.00166 | RIKEN cDNA 6230424H07 gene                                                                                                                   | 6230424H07Rik                                  |
| 1432832_at   | 0.99467 | RIKEN cDNA 4933435G04 gene                                                                                                                   | 4933435G04Rik                                  |
| 1432833_at   | 1.04338 | RIKEN cDNA 4933435G04 gene                                                                                                                   | 4933435G04Rik                                  |
| 1432834_at   | 0.96319 | carboxypeptidase B2 (plasma)                                                                                                                 | Cpb2                                           |
| 1432835_at   | 1.04841 | carboxypeptidase B2 (plasma)                                                                                                                 | Cpb2                                           |
| 1432836_at   | 1.02727 | RIKEN cDNA 4833410I11 gene                                                                                                                   | 4833410I11Rik                                  |
| 1432837_at   | 1.03923 | RIKEN cDNA 2700080J24 gene                                                                                                                   | 2700080J24Rik                                  |
| 1432838_at   | 0.99310 | RIKEN cDNA 6430598H11 gene                                                                                                                   | 6430598H11Rik                                  |
| 1432839_at   | 1.04066 | RIKEN cDNA 6430598H11 gene                                                                                                                   | 6430598H11Rik                                  |
| 1432840_at   | 0.96386 | UDP-N-acetyl-alpha-D-galactosamine:polypeptide N-acetylgalactosaminyltransferase 11                                                          | Galnt11                                        |
| 1432841_at   | 0.99569 | RIKEN cDNA E130116L18 gene                                                                                                                   | E130116L18Rik                                  |
| 1432842_s_at | 1.00837 | "tyrosine 3-monooxygenase/tryptophan 5-monooxygenase activation protein, theta polypeptide"                                                  | Ywhaq                                          |
| 1432843_at   | 1.20756 | RIKEN cDNA 5730405O12 gene                                                                                                                   | 5730405O12Rik                                  |
| 1432844_at   | 0.89187 | phosphatase and actin regulator 4                                                                                                            | Phactr4                                        |
| 1432845_at   | 0.90856 | ---                                                                                                                                          | ---                                            |
| 1432846_at   | 0.96259 | RIKEN cDNA 5033428C03 gene                                                                                                                   | 5033428C03Rik                                  |
| 1432847_at   | 0.78917 | RIKEN cDNA 2810457G06 gene                                                                                                                   | 2810457G06Rik                                  |

|              |         |                                                          |               |  |
|--------------|---------|----------------------------------------------------------|---------------|--|
| 1432848_at   | 0.88835 | RIKEN cDNA 1200004M23 gene                               | 1200004M23Rik |  |
| 1432849_at   | 1.00419 | ---                                                      | ---           |  |
| 1432850_at   | 2.49113 | RIKEN cDNA 5430434G16 gene                               | 5430434G16Rik |  |
| 1432851_at   | 0.91244 | phosphatase and actin regulator 1                        | Phactr1       |  |
| 1432852_at   | 1.00274 | phosphatase and actin regulator 1                        | Phactr1       |  |
| 1432853_at   | 0.94815 | RIKEN cDNA 2900057C01 gene                               | 2900057C01Rik |  |
| 1432854_at   | 1.08957 | RIKEN cDNA 1700018P08 gene                               | 1700018P08Rik |  |
| 1432855_at   | 1.01053 | potassium channel tetramerisation domain containing 3    | Kctd3         |  |
| 1432856_at   | 0.94762 | ---                                                      | ---           |  |
| 1432857_at   | 1.00048 | RIKEN cDNA 6430500D05 gene                               | 6430500D05Rik |  |
| 1432858_at   | 1.00852 | RIKEN cDNA D730048M19 gene                               | D730048M19Rik |  |
| 1432859_at   | 1.41213 | RIKEN cDNA D730048M19 gene                               | D730048M19Rik |  |
| 1432860_at   | 1.17244 | pannexin 3                                               | Panx3         |  |
| 1432861_at   | 0.96329 | RIKEN cDNA 2900046F13 gene                               | 2900046F13Rik |  |
| 1432862_at   | 0.91643 | "NK2 transcription factor related, locus 4 (Drosophila)" | Nkx2-4        |  |
| 1432863_a_at | 1.00507 | "NK2 transcription factor related, locus 4 (Drosophila)" | Nkx2-4        |  |
| 1432864_at   | 1.00471 | ---                                                      | ---           |  |
| 1432865_at   | 1.00696 | RIKEN cDNA D730050C22 gene                               | D730050C22Rik |  |
| 1432866_at   | 1.10884 | RIKEN cDNA 6030442K20 gene                               | 6030442K20Rik |  |
| 1432867_at   | 0.95844 | RIKEN cDNA 9230112J17 gene                               | 9230112J17Rik |  |
| 1432868_at   | 0.95280 | RIKEN cDNA 2310047C04 gene                               | 2310047C04Rik |  |
| 1432869_at   | 0.94790 | ---                                                      | ---           |  |
| 1432870_at   | 0.90265 | RIKEN cDNA 4932429P19 gene                               | 4932429P19Rik |  |
| 1432871_at   | 1.10546 | RIKEN cDNA 4932429P19 gene                               | 4932429P19Rik |  |
| 1432872_at   | 0.81326 | RIKEN cDNA 4932702M13 gene                               | 4932702M13Rik |  |
| 1432873_at   | 0.99248 | RIKEN cDNA 4932702M13 gene                               | 4932702M13Rik |  |
| 1432874_at   | 0.97944 | RIKEN cDNA 4632404M16 gene                               | 4632404M16Rik |  |
| 1432875_at   | 0.93776 | RIKEN cDNA 4632409D06 gene                               | 4632409D06Rik |  |
| 1432876_at   | 0.91450 | RIKEN cDNA 4632418H02 gene                               | 4632418H02Rik |  |
| 1432877_at   | 1.02364 | RIKEN cDNA 4930544N03 gene                               | 4930544N03Rik |  |
| 1432878_at   | 0.93461 | RIKEN cDNA 4930544N03 gene                               | 4930544N03Rik |  |
| 1432879_at   | 0.91295 | RIKEN cDNA 6820402A03 gene                               | 6820402A03Rik |  |
| 1432880_at   | 0.99805 | RIKEN cDNA 6820402A03 gene                               | 6820402A03Rik |  |
| 1432881_at   | 0.92114 | RIKEN cDNA 4932437C15 gene                               | 4932437C15Rik |  |
| 1432882_at   | 0.93752 | RIKEN cDNA 4932431P20 gene                               | 4932431P20Rik |  |
| 1432883_at   | 1.02214 | RIKEN cDNA 4932431P20 gene                               | 4932431P20Rik |  |
| 1432884_at   | 0.97657 | RIKEN cDNA 2010003H20 gene                               | 2010003H20Rik |  |
| 1432885_at   | 0.99909 | RIKEN cDNA 4632432E15 gene                               | 4632432E15Rik |  |
| 1432886_at   | 1.03809 | RIKEN cDNA 5730488B01 gene                               | 5730488B01Rik |  |
| 1432887_at   | 1.00131 | RIKEN cDNA 3110048L19 gene                               | 3110048L19Rik |  |
| 1432888_at   | 1.07400 | RIKEN cDNA 4930455M05 gene                               | 4930455M05Rik |  |
| 1432889_at   | 0.87282 | RIKEN cDNA 4930466I24 gene                               | 4930466I24Rik |  |
| 1432890_at   | 1.08394 | RIKEN cDNA 2610011E03 gene                               | 2610011E03Rik |  |

|            |         |                                   |          |               |
|------------|---------|-----------------------------------|----------|---------------|
| 1432891_at | 1.07827 | RIKEN cDNA 5730564L20             | gene     | 5730564L20Rik |
| 1432892_at | 0.94943 | RIKEN cDNA 5730564L20             | gene     | 5730564L20Rik |
| 1432893_at | 1.03561 | RIKEN cDNA 9130011L11             | gene     | 9130011L11Rik |
| 1432894_at | 1.01338 | RIKEN cDNA 9130011L11             | gene     | 9130011L11Rik |
| 1432895_at | 0.96732 | RIKEN cDNA 9030409K20             | gene     | 9030409K20Rik |
| 1432896_at | 1.03109 | RIKEN cDNA 9030409K20             | gene     | 9030409K20Rik |
| 1432897_at | 0.89647 | RIKEN cDNA 4930435N07             | gene     | 4930435N07Rik |
| 1432898_at | 0.90743 | RIKEN cDNA 4930544L18             | gene     | 4930544L18Rik |
| 1432899_at | 0.92724 | RIKEN cDNA 4833408G04             | gene     | 4833408G04Rik |
| 1432900_at | 1.02808 | cDNA sequence BC026657            | BC026657 |               |
| 1432901_at | 1.29682 | cDNA sequence BC026657            | BC026657 |               |
| 1432902_at | 0.82832 | RIKEN cDNA 9130414P19             | gene     | 9130414P19Rik |
| 1432903_at | 0.87436 | ---                               | ---      |               |
| 1432904_at | 0.96006 | RIKEN cDNA 3110037C07             | gene     | 3110037C07Rik |
| 1432905_at | 1.02867 | RIKEN cDNA 3110037C07             | gene     | 3110037C07Rik |
| 1432906_at | 0.96775 | RIKEN cDNA 1700126A01             | gene     | 1700126A01Rik |
| 1432907_at | 1.06000 | RIKEN cDNA 1700126A01             | gene     | 1700126A01Rik |
| 1432908_at | 0.89426 | RIKEN cDNA 2810410P21             | gene     | 2810410P21Rik |
| 1432909_at | 0.96171 | RIKEN cDNA 4933424H11             | gene     | 4933424H11Rik |
| 1432910_at | 1.66988 | BTB (POZ) domain containing 7     | Btbd7    |               |
| 1432911_at | 1.03610 | scaffold attachment factor B      | Safb     |               |
| 1432912_at | 0.95248 | ---                               | ---      |               |
| 1432913_at | 0.91359 | leucine rich repeat containing 52 | Lrrc52   |               |
| 1432914_at | 1.01932 | leucine rich repeat containing 52 | Lrrc52   |               |
| 1432915_at | 0.97016 | RIKEN cDNA 5730407I07             | gene     | 5730407I07Rik |
| 1432916_at | 1.07318 | RIKEN cDNA 5730407I07             | gene     | 5730407I07Rik |
| 1432917_at | 0.97497 | RIKEN cDNA 4933408M05             | gene     | 4933408M05Rik |
| 1432918_at | 1.44204 | RIKEN cDNA 4921511E18             | gene     | 4921511E18Rik |
| 1432919_at | 0.92823 | RIKEN cDNA 4921511E18             | gene     | 4921511E18Rik |
| 1432920_at | 0.95398 | RIKEN cDNA 5330421C15             | gene     | 5330421C15Rik |
| 1432921_at | 0.95952 | ---                               | ---      |               |
| 1432922_at | 0.86105 | RIKEN cDNA 4933416E14             | gene     | 4933416E14Rik |
| 1432923_at | 1.03276 | RIKEN cDNA 2810404I24             | gene     | 2810404I24Rik |
| 1432924_at | 1.39091 | RIKEN cDNA 2810404I24             | gene     | 2810404I24Rik |
| 1432925_at | 0.97156 | RIKEN cDNA 4933416A02             | gene     | 4933416A02Rik |
| 1432926_at | 0.98600 | RIKEN cDNA 2900069M18             | gene     | 2900069M18Rik |
| 1432927_at | 0.84013 | RIKEN cDNA 4921507K24             | gene     | 4921507K24Rik |
| 1432928_at | 1.04952 | RIKEN cDNA 4921507K24             | gene     | 4921507K24Rik |
| 1432929_at | 1.02028 | RIKEN cDNA 4930453O09             | gene     | 4930453O09Rik |
| 1432930_at | 1.04628 | RIKEN cDNA 4930453O09             | gene     | 4930453O09Rik |
| 1432931_at | 0.89092 | neurexin III                      | Nrxn3    |               |
| 1432932_at | 1.01502 | ---                               | ---      |               |
| 1432933_at | 0.96859 | RIKEN cDNA 4930429N05             | gene     | 4930429N05Rik |

|            |         |                       |      |               |
|------------|---------|-----------------------|------|---------------|
| 1432934_at | 0.90120 | RIKEN cDNA 4930429N05 | gene | 4930429N05Rik |
| 1432935_at | 0.84937 | RIKEN cDNA 5330433J24 | gene | 5330433J24Rik |
| 1432936_at | 0.92157 | RIKEN cDNA 5330433J24 | gene | 5330433J24Rik |
| 1432937_at | 1.12439 | RIKEN cDNA 5430439C14 | gene | 5430439C14Rik |
| 1432938_at | 1.09016 | RIKEN cDNA 5430439C14 | gene | 5430439C14Rik |
| 1432939_at | 1.06455 | RIKEN cDNA 5730405N03 | gene | 5730405N03Rik |
| 1432940_at | 1.07748 | RIKEN cDNA 5730405N03 | gene | 5730405N03Rik |
| 1432941_at | 0.88731 | RIKEN cDNA 5730408A14 | gene | 5730408A14Rik |
| 1432942_at | 0.97287 | RIKEN cDNA 5730408A14 | gene | 5730408A14Rik |
| 1432943_at | 0.91161 | RIKEN cDNA 2900046L07 | gene | 2900046L07Rik |
| 1432944_at | 0.93354 | RIKEN cDNA 2900046L07 | gene | 2900046L07Rik |
| 1432945_at | 0.78428 | RIKEN cDNA 5230400M06 | gene | 5230400M06Rik |
| 1432946_at | 1.06380 | RIKEN cDNA 5230400M06 | gene | 5230400M06Rik |
| 1432947_at | 0.95701 | RIKEN cDNA 4921519G19 | gene | 4921519G19Rik |
| 1432948_at | 1.03107 | RIKEN cDNA 4921519G19 | gene | 4921519G19Rik |
| 1432949_at | 0.94841 | RIKEN cDNA 5330421F21 | gene | 5330421F21Rik |
| 1432950_at | 1.00218 | RIKEN cDNA 5330421F21 | gene | 5330421F21Rik |
| 1432951_at | 1.05936 | RIKEN cDNA 4930448E22 | gene | 4930448E22Rik |
| 1432952_at | 1.01437 | RIKEN cDNA 4930448E22 | gene | 4930448E22Rik |
| 1432953_at | 1.00360 | RIKEN cDNA 4921520E09 | gene | 4921520E09Rik |
| 1432954_at | 1.06915 | RIKEN cDNA 4921520E09 | gene | 4921520E09Rik |
| 1432955_at | 0.93607 | RIKEN cDNA 4930444K16 | gene | 4930444K16Rik |
| 1432956_at | 0.96215 | RIKEN cDNA 4930444K16 | gene | 4930444K16Rik |
| 1432957_at | 0.94262 | RIKEN cDNA 5730407O05 | gene | 5730407O05Rik |
| 1432958_at | 1.00472 | RIKEN cDNA 5730407O05 | gene | 5730407O05Rik |
| 1432959_at | 1.07642 | RIKEN cDNA 4930447I22 | gene | 4930447I22Rik |
| 1432960_at | 0.99541 | RIKEN cDNA 4930447I22 | gene | 4930447I22Rik |
| 1432961_at | 0.98615 | RIKEN cDNA 2610024D14 | gene | 2610024D14Rik |
| 1432962_at | 1.16936 | RIKEN cDNA 2610024D14 | gene | 2610024D14Rik |
| 1432963_at | 0.91471 | RIKEN cDNA 2410049M19 | gene | 2410049M19Rik |
| 1432964_at | 1.12497 | RIKEN cDNA 2410049M19 | gene | 2410049M19Rik |
| 1432965_at | 0.96821 | RIKEN cDNA 4921507H08 | gene | 4921507H08Rik |
| 1432966_at | 0.98804 | RIKEN cDNA 4921507H08 | gene | 4921507H08Rik |
| 1432967_at | 0.95796 | RIKEN cDNA 4930456A14 | gene | 4930456A14Rik |
| 1432968_at | 1.13880 | RIKEN cDNA 4930456A14 | gene | 4930456A14Rik |
| 1432969_at | 1.02074 | RIKEN cDNA 4933423K11 | gene | 4933423K11Rik |
| 1432970_at | 1.09439 | RIKEN cDNA 4933423K11 | gene | 4933423K11Rik |
| 1432971_at | 0.76360 | RIKEN cDNA 4921518B13 | gene | 4921518B13Rik |
| 1432972_at | 0.98864 | RIKEN cDNA 4921518B13 | gene | 4921518B13Rik |
| 1432973_at | 1.06073 | RIKEN cDNA 4933421H12 | gene | 4933421H12Rik |
| 1432974_at | 1.01758 | RIKEN cDNA 4933421H12 | gene | 4933421H12Rik |
| 1432975_at | 1.11448 | RIKEN cDNA 2310038E17 | gene | 2310038E17Rik |
| 1432976_at | 1.09231 | RIKEN cDNA 2310038E17 | gene | 2310038E17Rik |

|                        |         |                                                  |      |                            |
|------------------------|---------|--------------------------------------------------|------|----------------------------|
| 1432977_at             | 0.94250 | RIKEN cDNA 9030607L02                            | gene | 9030607L02Rik              |
| 1432978_at             | 1.35425 | RIKEN cDNA 9030607L02                            | gene | 9030607L02Rik              |
| 1432979_at             | 1.01694 | GATA zinc finger domain containing 2B            |      | Gatad2b                    |
| 1432980_at             | 0.87269 | RIKEN cDNA 5730420F10                            | gene | 5730420F10Rik              |
| 1432981_at             | 1.02847 | mitogen-activated protein kinase kinase kinase 9 |      | Map3k9                     |
| 1432982_at             | 0.99843 | RIKEN cDNA 4930456J16                            | gene | 4930456J16Rik              |
| 1432983_at             | 1.10549 | RIKEN cDNA 1700026H06                            | gene | 1700026H06Rik              |
| 1432984_at             | 1.04568 | RIKEN cDNA 1700026H06                            | gene | 1700026H06Rik              |
| 1432985_at             | 1.08119 | RIKEN cDNA 5430402M21                            | gene | 5430402M21Rik              |
| 1432986_at             | 0.98783 | RIKEN cDNA 5430402M21                            | gene | 5430402M21Rik              |
| 1432987_at             | 0.89557 | ---                                              | ---  |                            |
| 1432988_at             | 1.08874 | RIKEN cDNA 2610040L17                            | gene | 2610040L17Rik              |
| 1432989_at             | 0.98100 | RIKEN cDNA 2900011F02                            | gene | 2900011F02Rik              |
| 1432990_at             | 0.94746 | RIKEN cDNA 5830495A06                            | gene | 5830495A06Rik              |
| 1432991_at             | 0.89043 | RIKEN cDNA 4930519E07                            | gene | 4930519E07Rik              |
| 1432992_at             | 0.99050 | RIKEN cDNA 4930403L11                            | gene | 4930403L11Rik              |
| 1432993_at             | 1.19143 | RIKEN cDNA 4930403L11                            | gene | 4930403L11Rik              |
| 1432994_at             | 1.01184 | RIKEN cDNA 2900057E15                            | gene | 2900057E15Rik              |
| 1432995_at             | 1.14462 | RIKEN cDNA 2900057E15                            | gene | 2900057E15Rik              |
| 1432996_at             | 1.01177 | ---                                              | ---  |                            |
| 1432997_at             | 1.03985 | RIKEN cDNA 5830462P14                            | gene | 5830462P14Rik              |
| 1432998_at             | 0.99363 | RIKEN cDNA 5830462O15                            | gene | 5830462O15Rik              |
| 1432999_at             | 0.99991 | phosphodiesterase 11A                            |      | Pde11a                     |
| 1433000_at             | 0.97244 | ---                                              | ---  |                            |
| 1433001_at             | 0.94539 | RIKEN cDNA 1700019L13                            | gene | 1700019L13Rik              |
| 1433002_at             | 0.92635 | RIKEN cDNA 9030613N10                            | gene | 9030613N10Rik              |
| 1433003_at             | 0.92012 | RIKEN cDNA 4933423N03                            | gene | 4933423N03Rik              |
| 1433004_at             | 0.98333 | RIKEN cDNA 4833446E11                            | gene | 4833446E11Rik              |
| 1433005_at             | 1.05533 | RIKEN cDNA 4833446E11                            | gene | 4833446E11Rik              |
| 1433006_at             | 0.92858 | RIKEN cDNA 5430430B14                            | gene | 5430430B14Rik              |
| 1433007_at             | 0.98862 | RIKEN cDNA 5430430B14                            | gene | 5430430B14Rik              |
| 1433008_at             | 0.95657 | RIKEN cDNA 6330526H18                            | gene | 6330526H18Rik              |
| 1433009_at             | 1.10181 | RIKEN cDNA 9030607J07                            | gene | 9030607J07Rik              |
| 1433010_at             | 0.84929 | RIKEN cDNA 5530400N10                            | gene | 5530400N10Rik              |
| 1433011_at             | 1.03079 | RIKEN cDNA 4921506L19                            | gene | 4921506L19Rik              |
| 1433012_at             | 0.97052 | MAX gene associated                              |      | Mga                        |
| 1433013_at             | 0.95748 | RIKEN cDNA 4930485G23                            | gene | 4930485G23Rik              |
| 1433014_at             | 1.01076 | RIKEN cDNA 6330436F06                            | gene | 6330436F06Rik              |
| 1433015_at             | 0.99225 | RIKEN cDNA 6330436F06                            | gene | 6330436F06Rik              |
| 1433016_s_at           | 1.14605 | RIKEN cDNA 4933412F11                            | gene | RIKEN cDNA 4930529H12 gene |
| hypothetical LOC622653 | ///     | hypothetical LOC624958                           | ///  | hypothetical LOC625130     |
| ///                    |         | ///                                              |      | /// similar to RIKEN       |
| cDNA 4930529H12        | gene    | 4933412F11Rik                                    | ///  | 4930529H12Rik              |
| ///                    |         | ///                                              |      | /// LOC622653              |
| ///                    |         | ///                                              |      | /// LOC624958              |
| ///                    |         | ///                                              |      | /// LOC625130              |
| ///                    |         | ///                                              |      | /// LOC665740              |

|              |         |                                                                                                                            |      |               |
|--------------|---------|----------------------------------------------------------------------------------------------------------------------------|------|---------------|
| 1433017_at   | 0.99825 | RIKEN cDNA 8430420C20                                                                                                      | gene | 8430420C20Rik |
| 1433018_at   | 0.95807 | RIKEN cDNA 4930560O18                                                                                                      | gene | 4930560O18Rik |
| 1433019_at   | 0.85004 | RIKEN cDNA 4833419G08                                                                                                      | gene | 4833419G08Rik |
| 1433020_at   | 0.95193 | RIKEN cDNA 5830413G11                                                                                                      | gene | 5830413G11Rik |
| 1433021_at   | 0.89207 | RIKEN cDNA 5830413G11                                                                                                      | gene | 5830413G11Rik |
| 1433022_at   | 0.85621 | RIKEN cDNA 2310068G24                                                                                                      | gene | 2310068G24Rik |
| 1433023_at   | 0.90272 | RIKEN cDNA 2310068G24                                                                                                      | gene | 2310068G24Rik |
| 1433024_at   | 1.09972 | RIKEN cDNA 4930421C12                                                                                                      | gene | 4930421C12Rik |
| 1433025_x_at | 0.97287 | "BCL2/adenovirus E1B interacting protein 1, NIP2"                                                                          |      | Bnip2         |
| 1433026_at   | 0.95193 | ---                                                                                                                        | ---  |               |
| 1433027_at   | 1.19551 | RIKEN cDNA 5830485P09                                                                                                      | gene | 5830485P09Rik |
| 1433028_at   | 0.91758 | RIKEN cDNA 4833411I10                                                                                                      | gene | 4833411I10Rik |
| 1433029_at   | 1.01759 | "potassium inwardly-rectifying channel, subfamily J, member 9"                                                             |      | Kcnj9         |
| 1433030_at   | 1.06784 | RIKEN cDNA 5730406E14                                                                                                      | gene | 5730406E14Rik |
| 1433031_at   | 0.94391 | RIKEN cDNA 2900064K03                                                                                                      | gene | 2900064K03Rik |
| 1433032_at   | 1.02927 | RIKEN cDNA 2900064K03                                                                                                      | gene | 2900064K03Rik |
| 1433033_at   | 0.95739 | RIKEN cDNA 2310007H11                                                                                                      | gene | 2310007H11Rik |
| 1433034_at   | 0.99409 | RIKEN cDNA 2310007H11                                                                                                      | gene | 2310007H11Rik |
| 1433035_at   | 0.87154 | RIKEN cDNA 5430430K15                                                                                                      | gene | 5430430K15Rik |
| 1433036_at   | 0.94474 | RIKEN cDNA 4930564B12                                                                                                      | gene | 4930564B12Rik |
| 1433037_at   | 0.95580 | RIKEN cDNA 5830434F19                                                                                                      | gene | 5830434F19Rik |
| 1433038_at   | 0.89566 | "Visual cortex cDNA, RIKEN full-length enriched library, clone:K230311O21<br>product:unclassifiable, full insert sequence" | ---  |               |
| 1433039_at   | 1.02207 | RIKEN cDNA 4930555B11                                                                                                      | gene | 4930555B11Rik |
| 1433040_at   | 0.84525 | RIKEN cDNA 2900018E21                                                                                                      | gene | 2900018E21Rik |
| 1433041_at   | 1.01446 | Rab9 effector protein with kelch motifs                                                                                    |      | Rabepk        |
| 1433042_at   | 0.95376 | ---                                                                                                                        | ---  |               |
| 1433043_at   | 1.14299 | chondroitin sulfate proteoglycan 2                                                                                         |      | Cspg2         |
| 1433044_at   | 1.09760 | chondroitin sulfate proteoglycan 2                                                                                         |      | Cspg2         |
| 1433045_at   | 1.01572 | RIKEN cDNA 4930535F04                                                                                                      | gene | 4930535F04Rik |
| 1433046_at   | 0.97062 | RIKEN cDNA 4930535F04                                                                                                      | gene | 4930535F04Rik |
| 1433047_at   | 1.28300 | RIKEN cDNA 5330430B06                                                                                                      | gene | 5330430B06Rik |
| 1433048_at   | 1.09424 | RIKEN cDNA 4933428L01                                                                                                      | gene | 4933428L01Rik |
| 1433049_at   | 1.05413 | RIKEN cDNA 5730478J17                                                                                                      | gene | 5730478J17Rik |
| 1433050_at   | 1.24097 | RIKEN cDNA 5730478J17                                                                                                      | gene | 5730478J17Rik |
| 1433051_at   | 1.02780 | RIKEN cDNA 2610011I18                                                                                                      | gene | 2610011I18Rik |
| 1433052_at   | 0.98517 | "ELAV (embryonic lethal, abnormal vision, Drosophila)-like 2 (Hu antigen<br>B)"                                            |      | Elavl2        |
| 1433053_at   | 1.10446 | integrin beta 2-like                                                                                                       |      | Itgb2l        |
| 1433054_at   | 1.15667 | integrin beta 2-like                                                                                                       |      | Itgb2l        |
| 1433055_at   | 1.10887 | RIKEN cDNA 4931407J08                                                                                                      | gene | 4931407J08Rik |
| 1433056_at   | 1.00769 | RIKEN cDNA 4931407J08                                                                                                      | gene | 4931407J08Rik |
| 1433057_at   | 0.99632 | RIKEN cDNA 4933411O13                                                                                                      | gene | 4933411O13Rik |



|            |         |                                                                                           |               |
|------------|---------|-------------------------------------------------------------------------------------------|---------------|
| 1433058_at | 1.08030 | RIKEN cDNA 4933411O13 gene                                                                | 4933411O13Rik |
| 1433059_at | 1.02776 | RIKEN cDNA 4930439G18 gene                                                                | 4930439G18Rik |
| 1433060_at | 1.06301 | RIKEN cDNA 6230426I18 gene                                                                | 6230426I18Rik |
| 1433061_at | 1.03068 | RIKEN cDNA 4933423L19 gene                                                                | 4933423L19Rik |
| 1433062_at | 1.04332 | WD repeat domain 66 Wdr66                                                                 |               |
| 1433063_at | 0.99611 | WD repeat domain 66 Wdr66                                                                 |               |
| 1433064_at | 1.04633 | acyl-CoA thioesterase 12 Acot12                                                           |               |
| 1433065_at | 0.86145 | RIKEN cDNA 6330510M09 gene                                                                | 6330510M09Rik |
| 1433066_at | 1.04136 | RIKEN cDNA 6330510M09 gene                                                                | 6330510M09Rik |
| 1433067_at | 1.04121 | RIKEN cDNA 6330582A15 gene                                                                | 6330582A15Rik |
| 1433068_at | 1.06763 | RIKEN cDNA 6330582A15 gene                                                                | 6330582A15Rik |
| 1433069_at | 1.04817 | ---                                                                                       | ---           |
| 1433070_at | 1.02848 | RIKEN cDNA 5830433M15 gene                                                                | 5830433M15Rik |
| 1433071_at | 0.89839 | RIKEN cDNA 6430605C03 gene                                                                | 6430605C03Rik |
| 1433072_at | 1.19848 | RIKEN cDNA 4933425E08 gene                                                                | 4933425E08Rik |
| 1433073_at | 1.03727 | RIKEN cDNA 4933425E08 gene                                                                | 4933425E08Rik |
| 1433074_at | 0.95059 | RIKEN cDNA 4931412I15 gene                                                                | 4931412I15Rik |
| 1433075_at | 1.02134 | RIKEN cDNA 4931412I15 gene                                                                | 4931412I15Rik |
| 1433076_at | 0.97788 | RIKEN cDNA 5430402O13 gene                                                                | 5430402O13Rik |
| 1433077_at | 0.85606 | RIKEN cDNA 2700078F05 gene                                                                | 2700078F05Rik |
| 1433078_at | 0.93099 | RIKEN cDNA 5830435N06 gene                                                                | 5830435N06Rik |
| 1433079_at | 1.06729 | RIKEN cDNA 4933436P19 gene                                                                | 4933436P19Rik |
| 1433080_at | 1.03409 | RIKEN cDNA 4933436P19 gene                                                                | 4933436P19Rik |
| 1433081_at | 0.95340 | RIKEN cDNA 4933407I18 gene                                                                | 4933407I18Rik |
| 1433082_at | 1.18292 | RIKEN cDNA 4930448K20 gene                                                                | 4930448K20Rik |
| 1433083_at | 1.02940 | RIKEN cDNA 4930448K20 gene                                                                | 4930448K20Rik |
| 1433084_at | 1.05962 | RIKEN cDNA 4930402C16 gene                                                                | 4930402C16Rik |
| 1433085_at | 1.14799 | RIKEN cDNA 5930427J20 gene                                                                | 5930427J20Rik |
| 1433086_at | 1.02779 | RIKEN cDNA 5930427J20 gene                                                                | 5930427J20Rik |
| 1433087_at | 1.01142 | RIKEN cDNA 5330430C04 gene                                                                | 5330430C04Rik |
| 1433088_at | 0.93990 | RIKEN cDNA 5330430C04 gene                                                                | 5330430C04Rik |
| 1433089_at | 1.06387 | ---                                                                                       | ---           |
| 1433090_at | 1.10468 | ---                                                                                       | ---           |
| 1433091_at | 1.08587 | RIKEN cDNA 6430514K02 gene                                                                | 6430514K02Rik |
| 1433092_at | 1.00755 | RIKEN cDNA 3110062G12 gene                                                                | 3110062G12Rik |
| 1433093_at | 0.96930 | RIKEN cDNA 2900092N22 gene                                                                | 2900092N22Rik |
| 1433094_at | 1.02555 | "solute carrier family 1 (glial high affinity glutamate transporter), member 2"<br>Slc1a2 |               |
| 1433095_at | 1.07594 | ---                                                                                       | ---           |
| 1433096_at | 0.97659 | RIKEN cDNA 4930473M17 gene                                                                | 4930473M17Rik |
| 1433097_at | 1.03830 | RIKEN cDNA 4930473M17 gene                                                                | 4930473M17Rik |
| 1433098_at | 1.09281 | ---                                                                                       | ---           |
| 1433099_at | 0.80675 | RIKEN cDNA 4933428L12 gene                                                                | 4933428L12Rik |

|              |         |                                                                                                                                                                                                                          |                    |
|--------------|---------|--------------------------------------------------------------------------------------------------------------------------------------------------------------------------------------------------------------------------|--------------------|
| 1433100_at   | 1.12369 | transmembrane protein 153                                                                                                                                                                                                | Tmem153            |
| 1433101_at   | 1.20827 | RIKEN cDNA 9030419F21                                                                                                                                                                                                    | gene 9030419F21Rik |
| 1433102_at   | 0.98454 | RIKEN cDNA 3100002H20                                                                                                                                                                                                    | gene 3100002H20Rik |
| 1433103_at   | 0.96947 | hydrolethalus syndrome 1                                                                                                                                                                                                 | Hyls1              |
| 1433104_at   | 0.98404 | RIKEN cDNA 5730412F04                                                                                                                                                                                                    | gene 5730412F04Rik |
| 1433105_at   | 1.00893 | RIKEN cDNA 5830438M01                                                                                                                                                                                                    | gene 5830438M01Rik |
| 1433106_at   | 1.08285 | RIKEN cDNA 5830438M01                                                                                                                                                                                                    | gene 5830438M01Rik |
| 1433107_at   | 0.99893 | ---                                                                                                                                                                                                                      | ---                |
| 1433108_at   | 1.03743 | "T-cell receptor beta, joining region /// T-cell receptor beta, variable 8.2 /// T-cell receptor beta, variable 13 /// similar to T-cell receptor beta-1 chain C region" Tcrb-J /// Tcrb-V8.2 /// Tcrb-V13 /// LOC669847 |                    |
| 1433109_at   | 0.91602 | macrophage migration inhibitory factor                                                                                                                                                                                   | Mif                |
| 1433110_at   | 1.06854 | RIKEN cDNA 5830474E16                                                                                                                                                                                                    | gene 5830474E16Rik |
| 1433111_at   | 1.13780 | NHS-like 1                                                                                                                                                                                                               | Nhsl1              |
| 1433112_at   | 1.02344 | RIKEN cDNA 4933424L07                                                                                                                                                                                                    | gene 4933424L07Rik |
| 1433113_at   | 0.92987 | RIKEN cDNA 4921504P20                                                                                                                                                                                                    | gene 4921504P20Rik |
| 1433114_at   | 0.99099 | RIKEN cDNA 4921504P20                                                                                                                                                                                                    | gene 4921504P20Rik |
| 1433115_at   | 1.01790 | RIKEN cDNA 5730552O08                                                                                                                                                                                                    | gene 5730552O08Rik |
| 1433116_at   | 0.93102 | RIKEN cDNA 5730552O08                                                                                                                                                                                                    | gene 5730552O08Rik |
| 1433117_at   | 1.05773 | RIKEN cDNA 2300004M11                                                                                                                                                                                                    | gene 2300004M11Rik |
| 1433118_at   | 0.83355 | RIKEN cDNA 2300004M11                                                                                                                                                                                                    | gene 2300004M11Rik |
| 1433119_at   | 0.96456 | RIKEN cDNA 4930456G14                                                                                                                                                                                                    | gene 4930456G14Rik |
| 1433120_at   | 1.00203 | RIKEN cDNA 9530002O20                                                                                                                                                                                                    | gene 9530002O20Rik |
| 1433121_at   | 1.11205 | RIKEN cDNA 5830490A04                                                                                                                                                                                                    | gene 5830490A04Rik |
| 1433122_at   | 0.89812 | RIKEN cDNA 2900069G24                                                                                                                                                                                                    | gene 2900069G24Rik |
| 1433123_at   | 0.86853 | RIKEN cDNA 2900069G24                                                                                                                                                                                                    | gene 2900069G24Rik |
| 1433124_at   | 1.07498 | RIKEN cDNA 4930534I15                                                                                                                                                                                                    | gene 4930534I15Rik |
| 1433125_at   | 1.02965 | RIKEN cDNA 5330422M15                                                                                                                                                                                                    | gene 5330422M15Rik |
| 1433126_at   | 0.99702 | RIKEN cDNA 5330422M15                                                                                                                                                                                                    | gene 5330422M15Rik |
| 1433127_at   | 0.87101 | RIKEN cDNA 4930513L20                                                                                                                                                                                                    | gene 4930513L20Rik |
| 1433128_at   | 1.02083 | RIKEN cDNA 4930423C22                                                                                                                                                                                                    | gene 4930423C22Rik |
| 1433129_at   | 1.07821 | RIKEN cDNA 2900040J22                                                                                                                                                                                                    | gene 2900040J22Rik |
| 1433130_at   | 0.95857 | RIKEN cDNA 8430418B16                                                                                                                                                                                                    | gene 8430418B16Rik |
| 1433131_at   | 0.98169 | RIKEN cDNA 5033425B01                                                                                                                                                                                                    | gene 5033425B01Rik |
| 1433132_at   | 0.96369 | EDAR (ectodysplasin-A receptor)-associated death domain Edaradd                                                                                                                                                          |                    |
| 1433133_at   | 1.05075 | EDAR (ectodysplasin-A receptor)-associated death domain Edaradd                                                                                                                                                          |                    |
| 1433134_at   | 1.02498 | RIKEN cDNA 5830448L01                                                                                                                                                                                                    | gene 5830448L01Rik |
| 1433135_at   | 1.02431 | "golgi autoantigen, golgin subfamily b, macrogolgin 1" Golgb1                                                                                                                                                            |                    |
| 1433136_at   | 0.96036 | RIKEN cDNA 4930432H08                                                                                                                                                                                                    | gene 4930432H08Rik |
| 1433137_at   | 0.91077 | RIKEN cDNA 5031415H12                                                                                                                                                                                                    | gene 5031415H12Rik |
| 1433138_at   | 0.91647 | ---                                                                                                                                                                                                                      | ---                |
| 1433139_at   | 0.88297 | BTB (POZ) domain containing 14B Btbd14b                                                                                                                                                                                  |                    |
| 1433140_a_at | 0.98666 | BTB (POZ) domain containing 14B Btbd14b                                                                                                                                                                                  |                    |

|              |         |                                                                                    |       |               |
|--------------|---------|------------------------------------------------------------------------------------|-------|---------------|
| 1433141_at   | 1.03947 | RIKEN cDNA 4921504P05                                                              | gene  | 4921504P05Rik |
| 1433142_at   | 1.15723 | RIKEN cDNA 4921504P05                                                              | gene  | 4921504P05Rik |
| 1433143_at   | 0.91197 | RIKEN cDNA 9230118N17                                                              | gene  | 9230118N17Rik |
| 1433144_at   | 0.97889 | "asparagine-linked glycosylation 2 homolog (yeast, alpha-1,3-mannosyltransferase)" | Alg2  |               |
| 1433145_at   | 0.80585 | RIKEN cDNA 4933431C10                                                              | gene  | 4933431C10Rik |
| 1433146_at   | 0.91999 | caldesmon 1                                                                        | Cald1 |               |
| 1433147_at   | 2.05215 | caldesmon 1                                                                        | Cald1 |               |
| 1433148_at   | 1.18991 | RIKEN cDNA 4930513N20                                                              | gene  | 4930513N20Rik |
| 1433149_at   | 1.02281 | RIKEN cDNA 4930513N20                                                              | gene  | 4930513N20Rik |
| 1433150_at   | 0.98866 | RIKEN cDNA 4933415B22                                                              | gene  | 4933415B22Rik |
| 1433151_at   | 0.90112 | RIKEN cDNA 4933415B22                                                              | gene  | 4933415B22Rik |
| 1433152_at   | 1.03812 | RIKEN cDNA 2900022B07                                                              | gene  | 2900022B07Rik |
| 1433153_at   | 0.96309 | RIKEN cDNA 9030201C23                                                              | gene  | 9030201C23Rik |
| 1433154_at   | 0.96790 | RIKEN cDNA B230204H03                                                              | gene  | B230204H03Rik |
| 1433155_at   | 1.05042 | RIKEN cDNA B230204H03                                                              | gene  | B230204H03Rik |
| 1433156_at   | 0.86427 | Kv channel-interacting protein 1                                                   |       | Kcnip1        |
| 1433157_at   | 1.03398 | RIKEN cDNA 6330562C20                                                              | gene  | 6330562C20Rik |
| 1433158_at   | 1.00025 | kinesin family member 13B                                                          |       | Kif13b        |
| 1433159_at   | 1.05823 | kinesin family member 13B                                                          |       | Kif13b        |
| 1433160_at   | 0.88679 | RIKEN cDNA 1700008N17                                                              | gene  | 1700008N17Rik |
| 1433161_at   | 0.91233 | RIKEN cDNA 1700008N17                                                              | gene  | 1700008N17Rik |
| 1433162_at   | 1.04013 | RIKEN cDNA 6230414M07                                                              | gene  | 6230414M07Rik |
| 1433163_at   | 0.91612 | RIKEN cDNA 6230414M07                                                              | gene  | 6230414M07Rik |
| 1433164_at   | 1.01459 | RIKEN cDNA 4930570E01                                                              | gene  | 4930570E01Rik |
| 1433165_at   | 1.04758 | RIKEN cDNA 4930570E01                                                              | gene  | 4930570E01Rik |
| 1433166_at   | 1.02738 | RIKEN cDNA 4930485E13                                                              | gene  | 4930485E13Rik |
| 1433167_at   | 1.00550 | RIKEN cDNA 4930444E06                                                              | gene  | 4930444E06Rik |
| 1433168_x_at | 1.02194 | RIKEN cDNA 5830456J23                                                              | gene  | 5830456J23Rik |
| 1433169_at   | 0.87093 | RIKEN cDNA 5830456J23                                                              | gene  | 5830456J23Rik |
| 1433170_at   | 1.17670 | RIKEN cDNA 2900034C19                                                              | gene  | 2900034C19Rik |
| 1433171_at   | 0.95993 | RIKEN cDNA 3110049I03                                                              | gene  | 3110049I03Rik |
| 1433172_at   | 0.99922 | RIKEN cDNA 3110049I03                                                              | gene  | 3110049I03Rik |
| 1433173_at   | 0.88748 | RIKEN cDNA 5430440L12                                                              | gene  | 5430440L12Rik |
| 1433174_a_at | 1.20709 | RIKEN cDNA 5430440L12                                                              | gene  | 5430440L12Rik |
| 1433175_at   | 0.97157 | ---                                                                                | ---   |               |
| 1433176_at   | 0.87658 | RIKEN cDNA 4930563F15                                                              | gene  | 4930563F15Rik |
| 1433177_at   | 1.59811 | RIKEN cDNA 5830411G16                                                              | gene  | 5830411G16Rik |
| 1433178_at   | 1.01531 | RIKEN cDNA 4933427C19                                                              | gene  | 4933427C19Rik |
| 1433179_at   | 0.97022 | MORN repeat containing 1                                                           |       | Morn1         |
| 1433180_at   | 1.25839 | MORN repeat containing 1                                                           |       | Morn1         |
| 1433181_at   | 1.03747 | RIKEN cDNA 4930431N21                                                              | gene  | 4930431N21Rik |
| 1433182_at   | 0.80420 | RIKEN cDNA 4930431N21                                                              | gene  | 4930431N21Rik |

|              |         |                       |      |               |
|--------------|---------|-----------------------|------|---------------|
| 1433183_at   | 0.96571 | RIKEN cDNA 6720477C19 | gene | 6720477C19Rik |
| 1433184_at   | 1.08658 | RIKEN cDNA 6720477C19 | gene | 6720477C19Rik |
| 1433185_at   | 1.06424 | RIKEN cDNA 2610019A05 | gene | 2610019A05Rik |
| 1433186_at   | 1.21133 | RIKEN cDNA 2610019A05 | gene | 2610019A05Rik |
| 1433187_at   | 1.02980 | RIKEN cDNA B230112I24 | gene | B230112I24Rik |
| 1433188_at   | 1.00939 | RIKEN cDNA B230112I24 | gene | B230112I24Rik |
| 1433189_at   | 0.89362 | RIKEN cDNA 4933433N18 | gene | 4933433N18Rik |
| 1433190_at   | 0.98172 | RIKEN cDNA 4933433N18 | gene | 4933433N18Rik |
| 1433191_at   | 1.10328 | RIKEN cDNA A430105P17 | gene | A430105P17Rik |
| 1433192_at   | 1.06812 | RIKEN cDNA A430105P17 | gene | A430105P17Rik |
| 1433193_at   | 1.03511 | RIKEN cDNA 4930433M22 | gene | 4930433M22Rik |
| 1433194_at   | 0.96835 | RIKEN cDNA 4930433M22 | gene | 4930433M22Rik |
| 1433195_at   | 0.88670 | RIKEN cDNA 9530006O14 | gene | 9530006O14Rik |
| 1433196_at   | 0.95450 | RIKEN cDNA 9530006O14 | gene | 9530006O14Rik |
| 1433197_at   | 1.08240 | RIKEN cDNA 4930445B03 | gene | 4930445B03Rik |
| 1433198_at   | 1.02871 | RIKEN cDNA 4930445B03 | gene | 4930445B03Rik |
| 1433199_at   | 0.91278 | RIKEN cDNA B230114A03 | gene | B230114A03Rik |
| 1433200_at   | 1.00366 | RIKEN cDNA B230114A03 | gene | B230114A03Rik |
| 1433201_at   | 1.10219 | RIKEN cDNA 2310079F09 | gene | 2310079F09Rik |
| 1433202_at   | 0.87778 | RIKEN cDNA 6030400A10 | gene | 6030400A10Rik |
| 1433203_at   | 1.12281 | RIKEN cDNA 6030400A10 | gene | 6030400A10Rik |
| 1433204_at   | 0.94737 | RIKEN cDNA 2810436B12 | gene | 2810436B12Rik |
| 1433205_at   | 1.46773 | RIKEN cDNA 2810436B12 | gene | 2810436B12Rik |
| 1433206_at   | 1.01116 | RIKEN cDNA 5033430J17 | gene | 5033430J17Rik |
| 1433207_at   | 0.98917 | RIKEN cDNA 5033430J17 | gene | 5033430J17Rik |
| 1433208_at   | 0.91419 | RIKEN cDNA 2210017G18 | gene | 2210017G18Rik |
| 1433209_at   | 0.88377 | RIKEN cDNA 2210017G18 | gene | 2210017G18Rik |
| 1433210_at   | 0.95841 | repetin Rptn          |      |               |
| 1433211_at   | 1.12531 | repetin Rptn          |      |               |
| 1433212_at   | 0.96352 | RIKEN cDNA 2700008E08 | gene | 2700008E08Rik |
| 1433213_at   | 1.00156 | RIKEN cDNA 2700008E08 | gene | 2700008E08Rik |
| 1433214_x_at | 1.01542 | RIKEN cDNA 2700008E08 | gene | 2700008E08Rik |
| 1433215_at   | 0.92119 | ---                   | ---  |               |
| 1433216_at   | 0.88419 | RIKEN cDNA 9430024C03 | gene | 9430024C03Rik |
| 1433217_at   | 1.16925 | RIKEN cDNA 4930566N20 | gene | 4930566N20Rik |
| 1433218_at   | 0.90455 | RIKEN cDNA 4930566N20 | gene | 4930566N20Rik |
| 1433219_at   | 0.95438 | RIKEN cDNA 6720482G16 | gene | 6720482G16Rik |
| 1433220_at   | 0.97494 | RIKEN cDNA 6720482G16 | gene | 6720482G16Rik |
| 1433221_at   | 0.89927 | RIKEN cDNA 2610311E24 | gene | 2610311E24Rik |
| 1433222_at   | 1.05570 | RIKEN cDNA 2610311E24 | gene | 2610311E24Rik |
| 1433223_at   | 0.94798 | RIKEN cDNA 5830442K09 | gene | 5830442K09Rik |
| 1433224_at   | 1.04040 | RIKEN cDNA 5830442K09 | gene | 5830442K09Rik |
| 1433225_at   | 1.04827 | RIKEN cDNA 6330403N20 | gene | 6330403N20Rik |

|            |         |                                                                                                                                  |      |               |
|------------|---------|----------------------------------------------------------------------------------------------------------------------------------|------|---------------|
| 1433226_at | 0.98924 | RIKEN cDNA 6330403N20                                                                                                            | gene | 6330403N20Rik |
| 1433227_at | 1.05825 | RIKEN cDNA 9430081G06                                                                                                            | gene | 9430081G06Rik |
| 1433228_at | 1.09973 | RIKEN cDNA 9430081G06                                                                                                            | gene | 9430081G06Rik |
| 1433229_at | 1.09929 | RIKEN cDNA 9430031J08                                                                                                            | gene | 9430031J08Rik |
| 1433230_at | 1.03406 | RIKEN cDNA 5730415C11                                                                                                            | gene | 5730415C11Rik |
| 1433231_at | 1.05343 | RIKEN cDNA 4933426I03                                                                                                            | gene | 4933426I03Rik |
| 1433232_at | 1.07712 | RIKEN cDNA 4933426I03                                                                                                            | gene | 4933426I03Rik |
| 1433233_at | 0.95074 | RIKEN cDNA 5430425E15                                                                                                            | gene | 5430425E15Rik |
| 1433234_at | 0.95832 | RIKEN cDNA 4930424E08                                                                                                            | gene | 4930424E08Rik |
| 1433235_at | 0.99133 | RIKEN cDNA C030011I16                                                                                                            | gene | C030011I16Rik |
| 1433236_at | 1.00547 | RIKEN cDNA 3830422I06                                                                                                            | gene | 3830422I06Rik |
| 1433237_at | 0.96580 | RIKEN cDNA 3830422I06                                                                                                            | gene | 3830422I06Rik |
| 1433238_at | 1.19697 | RIKEN cDNA 4930448E06                                                                                                            | gene | 4930448E06Rik |
| 1433239_at | 0.90355 | RIKEN cDNA 4930448E06                                                                                                            | gene | 4930448E06Rik |
| 1433240_at | 1.00687 | RIKEN cDNA 9430013L17                                                                                                            | gene | 9430013L17Rik |
| 1433241_at | 1.11732 | RIKEN cDNA 9430013L17                                                                                                            | gene | 9430013L17Rik |
| 1433242_at | 1.08759 | RIKEN cDNA 5830415B17                                                                                                            | gene | 5830415B17Rik |
| 1433243_at | 1.05042 | RIKEN cDNA 2810421E14                                                                                                            | gene | 2810421E14Rik |
| 1433244_at | 1.05502 | RIKEN cDNA 4930573G07                                                                                                            | gene | 4930573G07Rik |
| 1433245_at | 0.88917 | RIKEN cDNA 6720475M21                                                                                                            | gene | 6720475M21Rik |
| 1433246_at | 0.97850 | RIKEN cDNA 6720475M21                                                                                                            | gene | 6720475M21Rik |
| 1433247_at | 0.96022 | RIKEN cDNA C530007A02                                                                                                            | gene | C530007A02Rik |
| 1433248_at | 0.91836 | RIKEN cDNA 2310075M01                                                                                                            | gene | 2310075M01Rik |
| 1433249_at | 1.00842 | RIKEN cDNA 4931409D07                                                                                                            | gene | 4931409D07Rik |
| 1433250_at | 1.22263 | RIKEN cDNA 4931409D07                                                                                                            | gene | 4931409D07Rik |
| 1433251_at | 1.02195 | "heat shock protein 90kDa alpha (cytosolic), class A member 1 /// similar to heat shock protein 1, alpha" Hsp90aa1 /// LOC670148 |      |               |
| 1433252_at | 0.87734 | RIKEN cDNA 4932703K07                                                                                                            | gene | 4932703K07Rik |
| 1433253_at | 0.74403 | RIKEN cDNA 5033423K11                                                                                                            | gene | 5033423K11Rik |
| 1433254_at | 0.97941 | RIKEN cDNA 5033423K11                                                                                                            | gene | 5033423K11Rik |
| 1433255_at | 1.22150 | RIKEN cDNA 8430437B07                                                                                                            | gene | 8430437B07Rik |
| 1433256_at | 0.94583 | RIKEN cDNA A930011E06                                                                                                            | gene | A930011E06Rik |
| 1433257_at | 0.99653 | RIKEN cDNA A330102K18                                                                                                            | gene | A330102K18Rik |
| 1433258_at | 1.06456 | RIKEN cDNA A330102K18                                                                                                            | gene | A330102K18Rik |
| 1433259_at | 0.94813 | RIKEN cDNA 4930518C04                                                                                                            | gene | 4930518C04Rik |
| 1433260_at | 1.10974 | RIKEN cDNA 4930500E03                                                                                                            | gene | 4930500E03Rik |
| 1433261_at | 0.93070 | RIKEN cDNA 9430052A13                                                                                                            | gene | 9430052A13Rik |
| 1433262_at | 0.93353 | RIKEN cDNA 9430052A13                                                                                                            | gene | 9430052A13Rik |
| 1433263_at | 1.02562 | ---                                                                                                                              | ---  |               |
| 1433264_at | 0.83681 | ---                                                                                                                              | ---  |               |
| 1433265_at | 0.99926 | RIKEN cDNA 2810416A17                                                                                                            | gene | 2810416A17Rik |
| 1433266_at | 0.98108 | RIKEN cDNA 2810416A17                                                                                                            | gene | 2810416A17Rik |
| 1433267_at | 0.96130 | "inhibitor of growth family, member 1" Ing1                                                                                      |      |               |

|              |         |                            |       |               |
|--------------|---------|----------------------------|-------|---------------|
| 1433268_at   | 0.89316 | RIKEN cDNA 4930553M12      | gene  | 4930553M12Rik |
| 1433269_at   | 0.97035 | RIKEN cDNA 4930553M12      | gene  | 4930553M12Rik |
| 1433270_at   | 1.04600 | RIKEN cDNA 9530004M16      | gene  | 9530004M16Rik |
| 1433271_at   | 1.06855 | RIKEN cDNA 9530004M16      | gene  | 9530004M16Rik |
| 1433272_at   | 0.97414 | RIKEN cDNA A430110A21      | gene  | A430110A21Rik |
| 1433273_at   | 0.99850 | RIKEN cDNA 2610200G18      | gene  | 2610200G18Rik |
| 1433274_at   | 0.93113 | RIKEN cDNA 2610200G18      | gene  | 2610200G18Rik |
| 1433275_at   | 0.99475 | RIKEN cDNA 4933401B01      | gene  | 4933401B01Rik |
| 1433276_at   | 0.98693 | RIKEN cDNA 4930556A12      | gene  | 4930556A12Rik |
| 1433277_at   | 1.07178 | RIKEN cDNA D730048A03      | gene  | D730048A03Rik |
| 1433278_at   | 0.91026 | RIKEN cDNA 5830440H09      | gene  | 5830440H09Rik |
| 1433279_at   | 1.16995 | RIKEN cDNA 5830440H09      | gene  | 5830440H09Rik |
| 1433280_at   | 0.90804 | RIKEN cDNA 4933417G07      | gene  | 4933417G07Rik |
| 1433281_at   | 1.07811 | prune homolog (Drosophila) | Prune |               |
| 1433282_at   | 0.91390 | RIKEN cDNA 4930529H12      | gene  | 4930529H12Rik |
| 1433283_s_at | 0.89074 | ---                        | ---   |               |
| 1433284_at   | 0.99977 | RIKEN cDNA 4921522E08      | gene  | 4921522E08Rik |
| 1433285_at   | 1.01064 | RIKEN cDNA 9330179C17      | gene  | 9330179C17Rik |
| 1433286_at   | 0.98309 | RIKEN cDNA 4833417J16      | gene  | 4833417J16Rik |
| 1433287_at   | 1.02430 | RIKEN cDNA 4833417J16      | gene  | 4833417J16Rik |
| 1433288_at   | 0.95925 | RIKEN cDNA 1520401O13      | gene  | 1520401O13Rik |
| 1433289_at   | 0.99182 | RIKEN cDNA 9530078B04      | gene  | 9530078B04Rik |
| 1433290_at   | 1.13168 | RIKEN cDNA C030045M22      | gene  | C030045M22Rik |
| 1433291_at   | 1.00576 | RIKEN cDNA C030045M22      | gene  | C030045M22Rik |
| 1433292_at   | 0.91361 | RIKEN cDNA 1500032O14      | gene  | 1500032O14Rik |
| 1433293_at   | 1.00452 | RIKEN cDNA 1500032O14      | gene  | 1500032O14Rik |
| 1433294_at   | 0.93631 | RIKEN cDNA 4930449I04      | gene  | 4930449I04Rik |
| 1433295_at   | 1.15046 | RIKEN cDNA 4930449I04      | gene  | 4930449I04Rik |
| 1433296_at   | 0.99612 | RIKEN cDNA 2310045N14      | gene  | 2310045N14Rik |
| 1433297_at   | 1.10074 | RIKEN cDNA 1700039M15      | gene  | 1700039M15Rik |
| 1433298_at   | 1.07416 | RIKEN cDNA 5830461L22      | gene  | 5830461L22Rik |
| 1433299_at   | 0.94660 | RIKEN cDNA 5830461L22      | gene  | 5830461L22Rik |
| 1433300_at   | 0.94598 | RIKEN cDNA 2900005I04      | gene  | 2900005I04Rik |
| 1433301_at   | 0.92509 | RIKEN cDNA 4930478M09      | gene  | 4930478M09Rik |
| 1433302_at   | 0.98413 | cadherin 10                | Cdh10 |               |
| 1433303_at   | 0.85339 | RIKEN cDNA 4930483C01      | gene  | 4930483C01Rik |
| 1433304_at   | 1.03909 | RIKEN cDNA 4930483C01      | gene  | 4930483C01Rik |
| 1433305_at   | 0.96480 | RIKEN cDNA 9530034D02      | gene  | 9530034D02Rik |
| 1433306_at   | 0.86486 | RIKEN cDNA 4930456K20      | gene  | 4930456K20Rik |
| 1433307_at   | 0.89728 | RIKEN cDNA 4930509E22      | gene  | 4930509E22Rik |
| 1433308_at   | 1.00591 | RIKEN cDNA 9330159N22      | gene  | 9330159N22Rik |
| 1433309_at   | 0.82629 | RIKEN cDNA 4930472F24      | gene  | 4930472F24Rik |
| 1433310_at   | 0.84898 | RIKEN cDNA D530031A16      | gene  | D530031A16Rik |

|              |         |                       |      |               |
|--------------|---------|-----------------------|------|---------------|
| 1433311_at   | 1.01709 | RIKEN cDNA D530031A16 | gene | D530031A16Rik |
| 1433312_at   | 1.21720 | RIKEN cDNA 2700057C20 | gene | 2700057C20Rik |
| 1433313_at   | 0.94912 | RIKEN cDNA 6720454L07 | gene | 6720454L07Rik |
| 1433314_at   | 0.95287 | RIKEN cDNA 4930486A15 | gene | 4930486A15Rik |
| 1433315_at   | 0.94368 | RIKEN cDNA 4930486A15 | gene | 4930486A15Rik |
| 1433316_at   | 0.95470 | RIKEN cDNA 4930477O15 | gene | 4930477O15Rik |
| 1433317_at   | 0.96362 | RIKEN cDNA 4930477O15 | gene | 4930477O15Rik |
| 1433318_at   | 0.94681 | RIKEN cDNA 5430416B10 | gene | 5430416B10Rik |
| 1433319_at   | 0.97758 | RIKEN cDNA 5430437A18 | gene | 5430437A18Rik |
| 1433320_at   | 1.04679 | RIKEN cDNA 4930519N06 | gene | 4930519N06Rik |
| 1433321_at   | 0.92217 | RIKEN cDNA 9430087B13 | gene | 9430087B13Rik |
| 1433322_at   | 1.00670 | RIKEN cDNA 4930529F21 | gene | 4930529F21Rik |
| 1433323_at   | 1.10146 | RIKEN cDNA 4930529F21 | gene | 4930529F21Rik |
| 1433324_at   | 1.07619 | RIKEN cDNA 9330154F10 | gene | 9330154F10Rik |
| 1433325_at   | 0.96385 | RIKEN cDNA 9330154F10 | gene | 9330154F10Rik |
| 1433326_at   | 1.03562 | RIKEN cDNA 4930488N24 | gene | 4930488N24Rik |
| 1433327_at   | 0.97073 | ---                   | ---  |               |
| 1433328_at   | 0.85465 | RIKEN cDNA 1700095A21 | gene | 1700095A21Rik |
| 1433329_at   | 0.96151 | RIKEN cDNA 4930573C08 | gene | 4930573C08Rik |
| 1433330_at   | 0.93005 | RIKEN cDNA 4933401J01 | gene | 4933401J01Rik |
| 1433331_at   | 0.95776 | RIKEN cDNA C030046M01 | gene | C030046M01Rik |
| 1433332_at   | 1.15498 | RIKEN cDNA C030004M13 | gene | C030004M13Rik |
| 1433333_at   | 1.11977 | RIKEN cDNA C030004M13 | gene | C030004M13Rik |
| 1433334_at   | 0.94768 | RIKEN cDNA 1700024P12 | gene | 1700024P12Rik |
| 1433335_at   | 1.06684 | RIKEN cDNA 4930405G09 | gene | 4930405G09Rik |
| 1433336_at   | 1.06183 | RIKEN cDNA 4930405G09 | gene | 4930405G09Rik |
| 1433337_at   | 0.97699 | RIKEN cDNA 6720460K10 | gene | 6720460K10Rik |
| 1433338_at   | 1.74395 | RIKEN cDNA 6720460K10 | gene | 6720460K10Rik |
| 1433339_at   | 1.06666 | RIKEN cDNA 6030460B20 | gene | 6030460B20Rik |
| 1433340_at   | 0.96505 | RIKEN cDNA 4930480K02 | gene | 4930480K02Rik |
| 1433341_at   | 0.99123 | RIKEN cDNA 5730416F02 | gene | 5730416F02Rik |
| 1433342_at   | 1.00858 | RIKEN cDNA 5730416F02 | gene | 5730416F02Rik |
| 1433343_at   | 0.82494 | RIKEN cDNA 4930448K20 | gene | 4930448K20Rik |
| 1433344_at   | 0.88810 | RIKEN cDNA 4930448K20 | gene | 4930448K20Rik |
| 1433345_s_at | 0.94755 | RIKEN cDNA 4930448K20 | gene | 4930448K20Rik |
| 1433346_at   | 0.98239 | RIKEN cDNA 5830432F11 | gene | 5830432F11Rik |
| 1433347_at   | 1.09405 | RIKEN cDNA A930036A04 | gene | A930036A04Rik |
| 1433348_at   | 0.96667 | RIKEN cDNA 2810414N06 | gene | 2810414N06Rik |
| 1433349_at   | 0.92308 | RIKEN cDNA 4930553P13 | gene | 4930553P13Rik |
| 1433350_at   | 0.90430 | RIKEN cDNA 4930553P13 | gene | 4930553P13Rik |
| 1433351_at   | 1.04187 | RIKEN cDNA 4933412L11 | gene | 4933412L11Rik |
| 1433352_at   | 0.92021 | RIKEN cDNA C430049A07 | gene | C430049A07Rik |
| 1433353_at   | 0.98281 | RIKEN cDNA D530015H24 | gene | D530015H24Rik |

|              |                                                                        |               |         |
|--------------|------------------------------------------------------------------------|---------------|---------|
| 1433354_at   | 1.05134 RIKEN cDNA D530015H24 gene                                     | D530015H24Rik |         |
| 1433355_at   | 1.04415 RIKEN cDNA 2610021J01 gene                                     | 2610021J01Rik |         |
| 1433356_at   | 0.97712 RIKEN cDNA 2610021J01 gene                                     | 2610021J01Rik |         |
| 1433357_at   | 0.97225 RIKEN cDNA 5730422E09 gene                                     | 5730422E09Rik |         |
| 1433358_at   | 0.85369 RIKEN cDNA A230102O21 gene                                     | A230102O21Rik |         |
| 1433359_at   | 0.98727 --- ---                                                        |               |         |
| 1433360_at   | 0.90723 RIKEN cDNA 1700023B13 gene                                     | 1700023B13Rik |         |
| 1433361_at   | 1.06418 RIKEN cDNA 4930527F18 gene                                     | 4930527F18Rik |         |
| 1433362_at   | 0.95631 RIKEN cDNA 4930527F18 gene                                     | 4930527F18Rik |         |
| 1433363_at   | 1.00786 RIKEN cDNA A930036I15 gene                                     | A930036I15Rik |         |
| 1433364_at   | 0.89575 RIKEN cDNA A930036I15 gene                                     | A930036I15Rik |         |
| 1433365_at   | 0.95283 RIKEN cDNA 4930563N14 gene                                     | 4930563N14Rik |         |
| 1433366_at   | 1.02084 RIKEN cDNA 6030458A19 gene                                     | 6030458A19Rik |         |
| 1433367_at   | 1.22175 RIKEN cDNA 8430401P03 gene                                     | 8430401P03Rik |         |
| 1433368_x_at | 1.04262 RIKEN cDNA 8430401P03 gene                                     | 8430401P03Rik |         |
| 1433369_at   | 1.09589 RIKEN cDNA 8430401P03 gene                                     | 8430401P03Rik |         |
| 1433370_at   | 1.13775 RIKEN cDNA 4930474A20 gene                                     | 4930474A20Rik |         |
| 1433371_at   | 1.02825 RIKEN cDNA 5430427N15 gene                                     | 5430427N15Rik |         |
| 1433372_at   | 1.10647 RIKEN cDNA 5330425B07 gene                                     | 5330425B07Rik |         |
| 1433373_at   | 1.12969 suppressor of Ty 7 ( <i>S. cerevisiae</i> )-like Supt7l        |               |         |
| 1433374_at   | 1.07586 suppressor of Ty 7 ( <i>S. cerevisiae</i> )-like Supt7l        |               |         |
| 1433375_at   | 0.98027 RIKEN cDNA D530037P16 gene                                     | D530037P16Rik |         |
| 1433376_at   | 1.10828 RIKEN cDNA 5830445D09 gene                                     | 5830445D09Rik |         |
| 1433377_at   | 1.04924 RIKEN cDNA 5830445D09 gene                                     | 5830445D09Rik |         |
| 1433378_at   | 1.01046 RIKEN cDNA 9430019H13 gene                                     | 9430019H13Rik |         |
| 1433379_at   | 0.89250 RIKEN cDNA 9430019H13 gene                                     | 9430019H13Rik |         |
| 1433380_at   | 0.96351 RIKEN cDNA 4921509A06 gene                                     | 4921509A06Rik |         |
| 1433381_at   | 1.03733 RIKEN cDNA 4921509A06 gene                                     | 4921509A06Rik |         |
| 1433382_at   | 0.97324 RIKEN cDNA 1110065P19 gene                                     | 1110065P19Rik |         |
| 1433383_at   | 1.11829 RIKEN cDNA 1500002K03 gene                                     | 1500002K03Rik |         |
| 1433384_at   | 1.04740 RIKEN cDNA 9330199C07 gene                                     | 9330199C07Rik |         |
| 1433385_at   | 0.96857 RIKEN cDNA 4933428C20 gene                                     | 4933428C20Rik |         |
| 1433386_at   | 1.03182 RIKEN cDNA 4933428C20 gene                                     | 4933428C20Rik |         |
| 1433387_at   | 1.11050 RIKEN cDNA 2900022M07 gene                                     | 2900022M07Rik |         |
| 1433388_at   | 0.89253 RIKEN cDNA 2900022M07 gene                                     | 2900022M07Rik |         |
| 1433389_at   | 0.98514 "cytochrome P450, family 4, subfamily f, polypeptide 18"       |               | Cyp4f18 |
| 1433390_at   | 0.89069 RIKEN cDNA A230105L22 gene                                     | A230105L22Rik |         |
| 1433391_at   | 1.02967 --- ---                                                        |               |         |
| 1433392_at   | 0.98618 --- ---                                                        |               |         |
| 1433393_at   | 0.92606 RIKEN cDNA 3300002I10 gene                                     | 3300002I10Rik |         |
| 1433394_at   | 0.92960 microtubule associated serine/threonine kinase family member 4 |               | Mast4   |
| 1433395_at   | 0.90470 RIKEN cDNA 4921504P13 gene                                     | 4921504P13Rik |         |
| 1433396_at   | 1.02066 RIKEN cDNA 4921504P13 gene                                     | 4921504P13Rik |         |



1433397\_at 1.03353 RIKEN cDNA 9430012M22 gene 9430012M22Rik  
1433398\_at 1.87318 "FYVE, RhoGEF and PH domain containing 3" Fgd3  
1433399\_at 1.10371 RIKEN cDNA 2900078I11 gene 2900078I11Rik  
1433400\_at 0.93748 RIKEN cDNA 5033405D04 gene 5033405D04Rik  
1433401\_at 1.00260 RIKEN cDNA 5033405D04 gene 5033405D04Rik  
1433402\_at 1.04321 RIKEN cDNA 4930451E06 gene 4930451E06Rik  
1433403\_at 1.01702 RIKEN cDNA 2810489J07 gene 2810489J07Rik  
1433404\_at 1.07690 RIKEN cDNA 4930423O20 gene 4930423O20Rik  
1433405\_at 1.01567 --- ---  
1433406\_at 1.00510 hypothetical protein LOC668408 /// hypothetical protein LOC670057  
LOC668408 /// LOC670057  
1433407\_at 0.91352 minichromosome maintenance deficient 10 (S. cerevisiae) Mcm10  
1433408\_a\_at 1.08068 minichromosome maintenance deficient 10 (S. cerevisiae) Mcm10  
1433409\_at 1.18826 RIKEN cDNA C030014O09 gene C030014O09Rik  
1433410\_at 0.89685 RIKEN cDNA C030014O09 gene C030014O09Rik  
1433411\_at 0.84400 --- ---  
1433412\_at 1.19093 RIKEN cDNA 5730446C15 gene 5730446C15Rik  
1433413\_at 1.00328 neurexin I Nrnx1  
1433414\_at 1.05193 RIKEN cDNA 9530086P17 gene 9530086P17Rik  
1433415\_at 1.12780 RIKEN cDNA 5430432H19 gene 5430432H19Rik  
1433416\_at 0.96152 RIKEN cDNA 5430432H19 gene 5430432H19Rik  
1433417\_at 0.79743 RIKEN cDNA 8030497O21 gene 8030497O21Rik  
1433418\_at 1.10419 --- ---  
1433419\_at 0.98997 RIKEN cDNA 4930405A07 gene 4930405A07Rik  
1433420\_at 0.83235 RIKEN cDNA 4930527J03 gene 4930527J03Rik  
1433421\_at 1.06684 RIKEN cDNA 4930527J03 gene 4930527J03Rik  
1433422\_at 0.89659 hypothetical protein LOC626748 LOC626748  
1433423\_at 0.86562 RIKEN cDNA 2210008N01 gene 2210008N01Rik  
1433424\_at 1.05825 --- ---  
1433425\_at 0.91441 RIKEN cDNA 1700101I19 gene 1700101I19Rik  
1433426\_at 0.94024 RIKEN cDNA 1700111A04 gene 1700111A04Rik  
1433427\_at 1.00695 RIKEN cDNA 1700111A04 gene 1700111A04Rik  
1433428\_x\_at 0.95480 "transglutaminase 2, C polypeptide" Tgm2  
1433429\_at 0.94510 "phosphatidylinositol glycan anchor biosynthesis, class S" Pigs  
1433430\_s\_at 0.99779 "CDC23 (cell division cycle 23, yeast, homolog)" Cdc23  
1433431\_at 0.91749 pancreatic lipase Pnlip  
1433432\_x\_at 1.03213 ribosomal protein S12 /// similar to ribosomal protein S12 /// similar to  
ribosomal protein S12 Rps12 /// LOC670751 /// LOC672959  
1433433\_at 0.92021 MYST histone acetyltransferase 2 Myst2  
1433434\_at 1.09140 expressed sequence AW551984 AW551984  
1433435\_at 1.10349 expressed sequence AW551984 AW551984  
1433436\_s\_at 0.95182 "thiamine triphosphatase /// zinc finger homeobox 2, antisense" Thtpa ///  
Zfhx2as

|              |         |                                                                                                                                                                           |                                                                             |
|--------------|---------|---------------------------------------------------------------------------------------------------------------------------------------------------------------------------|-----------------------------------------------------------------------------|
| 1433437_at   | 0.98484 | dedicator of cytokinesis 8                                                                                                                                                | Dock8                                                                       |
| 1433438_x_at | 0.96281 | melanoma antigen                                                                                                                                                          | Mela                                                                        |
| 1433439_at   | 1.10121 | copine I                                                                                                                                                                  | Cpne1                                                                       |
| 1433440_x_at | 0.95812 | ubiquitin-like 1 (sentrin) activating enzyme E1B                                                                                                                          | Uble1b                                                                      |
| 1433441_at   | 0.96411 | F-box and leucine-rich repeat protein 5                                                                                                                                   | Fbxl5                                                                       |
| 1433442_at   | 1.01222 | Kelch-like 9 (Drosophila)                                                                                                                                                 | Klhl9                                                                       |
| 1433443_a_at | 1.40268 | 3-hydroxy-3-methylglutaryl-Coenzyme A synthase 1                                                                                                                          | Hmgcs1                                                                      |
| 1433444_at   | 1.43825 | 3-hydroxy-3-methylglutaryl-Coenzyme A synthase 1                                                                                                                          | Hmgcs1                                                                      |
| 1433445_x_at | 1.42824 | 3-hydroxy-3-methylglutaryl-Coenzyme A synthase 1                                                                                                                          | Hmgcs1                                                                      |
| 1433446_at   | 1.63936 | 3-hydroxy-3-methylglutaryl-Coenzyme A synthase 1                                                                                                                          | Hmgcs1                                                                      |
| 1433447_x_at | 1.03525 | chaperonin subunit 4 (delta)                                                                                                                                              | Cct4                                                                        |
| 1433448_at   | 0.98960 | RIKEN cDNA B430110G05 gene                                                                                                                                                | B430110G05Rik                                                               |
| 1433449_at   | 0.97314 | RIKEN cDNA B930037P14 gene                                                                                                                                                | B930037P14Rik                                                               |
| 1433450_at   | 0.88289 | "cyclin-dependent kinase 5, regulatory subunit (p35) 1"                                                                                                                   | Cdk5r1                                                                      |
| 1433451_at   | 0.90218 | "cyclin-dependent kinase 5, regulatory subunit (p35) 1"                                                                                                                   | Cdk5r1                                                                      |
| 1433452_at   | 0.88614 | RIKEN cDNA B630019K06 gene                                                                                                                                                | B630019K06Rik                                                               |
| 1433453_a_at | 0.92209 | ankyrin repeat and BTB (POZ) domain containing 2                                                                                                                          | Abtb2                                                                       |
| 1433454_at   | 0.99085 | ankyrin repeat and BTB (POZ) domain containing 2                                                                                                                          | Abtb2                                                                       |
| 1433455_at   | 0.97053 | SH2B adaptor protein 3                                                                                                                                                    | Sh2b3                                                                       |
| 1433456_at   | 1.02136 | expressed sequence AU022751                                                                                                                                               | AU022751                                                                    |
| 1433457_s_at | 1.01182 | G-rich RNA sequence binding factor 1                                                                                                                                      | Grsf1                                                                       |
| 1433458_at   | 0.89602 | RIKEN cDNA E330021D16 gene                                                                                                                                                | E330021D16Rik                                                               |
| 1433459_x_at | 0.93718 | "protease, serine, 2"                                                                                                                                                     | Prss2                                                                       |
| 1433460_at   | 1.31241 | tetratricopeptide repeat domain 7B                                                                                                                                        | Ttc7b                                                                       |
| 1433461_at   | 0.98207 | "splicing factor 3b, subunit 2"                                                                                                                                           | Sf3b2                                                                       |
| 1433462_a_at | 0.97420 | phosphatidylinositol 4-kinase type 2 alpha                                                                                                                                | Pi4k2a                                                                      |
| 1433463_at   | 0.94309 | RIKEN cDNA 0610010K06 gene                                                                                                                                                | 0610010K06Rik                                                               |
| 1433464_at   | 0.89032 | importin 13                                                                                                                                                               | Ipo13                                                                       |
| 1433465_a_at | 1.22129 | expressed sequence AI467606                                                                                                                                               | AI467606                                                                    |
| 1433466_at   | 0.97101 | expressed sequence AI467606                                                                                                                                               | AI467606                                                                    |
| 1433467_at   | 1.07345 | "solute carrier family 7 (cationic amino acid transporter, y+ system), member 6"                                                                                          | Slc7a6                                                                      |
| 1433468_at   | 0.89436 | RIKEN cDNA 6430527G18 gene                                                                                                                                                | 6430527G18Rik                                                               |
| 1433469_at   | 1.03102 | "leucine rich repeat protein 2, neuronal"                                                                                                                                 | Lrrn2                                                                       |
| 1433470_a_at | 1.06140 | "inner membrane protein, mitochondrial"                                                                                                                                   | Immt                                                                        |
| 1433471_at   | 1.12048 | "transcription factor 7, T-cell specific"                                                                                                                                 | Tcf7                                                                        |
| 1433472_x_at | 0.91211 | ribosomal protein L38 /// similar to ribosomal protein L38 | Rpl38 /// LOC625646 /// LOC638514 /// LOC664868 /// LOC672023 /// LOC674951 |
| 1433473_x_at | 0.88267 | TM2 domain containing 2                                                                                                                                                   | Tm2d2                                                                       |
| 1433474_at   | 0.85543 | EGF-like repeats and discoidin I-like domains 3                                                                                                                           | Edil3                                                                       |
| 1433475_a_at | 0.91804 | expressed sequence C78339                                                                                                                                                 | C78339                                                                      |

|              |         |                                                           |               |
|--------------|---------|-----------------------------------------------------------|---------------|
| 1433476_at   | 0.89665 | expressed sequence C78339                                 | C78339        |
| 1433477_at   | 0.97302 | active BCR-related gene Abr                               |               |
| 1433478_at   | 1.17307 | "presenilin associated, rhomboid-like" Parl               |               |
| 1433479_at   | 0.94864 | RIKEN cDNA 5730410I19 gene                                | 5730410I19Rik |
| 1433480_at   | 1.11114 | RIKEN cDNA 2900010J23 gene                                | 2900010J23Rik |
| 1433481_at   | 0.79824 | FK506 binding protein 14                                  | Fkbp14        |
| 1433482_a_at | 0.97508 | far upstream element (FUSE) binding protein 1             | Fubp1         |
| 1433483_s_at | 0.90649 | expressed sequence C86187                                 | C86187        |
| 1433484_at   | 1.07294 | "DNA segment, Chr 6, ERATO Doi 527, expressed"            | D6Ertd527e    |
| 1433485_x_at | 0.56181 | G protein-coupled receptor 56                             | Gpr56         |
| 1433486_at   | 1.10031 | chloride channel 3                                        | Clcn3         |
| 1433487_at   | 0.99697 | chloride channel 3                                        | Clcn3         |
| 1433488_x_at | 0.95396 | glucosamine (N-acetyl)-6-sulfatase                        | Gns           |
| 1433489_s_at | 0.63720 | fibroblast growth factor receptor 2                       | Fgfr2         |
| 1433490_s_at | 1.02098 | erythrocyte protein band 4.1-like 2                       | Epb4.112      |
| 1433491_at   | 1.03479 | erythrocyte protein band 4.1-like 2                       | Epb4.112      |
| 1433492_at   | 0.87475 | erythrocyte protein band 4.1-like 2                       | Epb4.112      |
| 1433493_at   | 0.84677 | RIKEN cDNA 5730472N09 gene                                | 5730472N09Rik |
| 1433494_at   | 0.87166 | downstream of Stk11                                       | Dos           |
| 1433495_at   | 0.93360 | glycosyltransferase 25 domain containing 1                | Glt25d1       |
| 1433496_at   | 0.93715 | glycosyltransferase 25 domain containing 1                | Glt25d1       |
| 1433497_at   | 1.00164 | aquarius                                                  | Aqr           |
| 1433498_at   | 0.87892 | RIKEN cDNA 2010005J08 gene                                | 2010005J08Rik |
| 1433499_at   | 0.83098 | RIKEN cDNA 2010005J08 gene                                | 2010005J08Rik |
| 1433500_at   | 0.86759 | DENN/MADD domain containing 2A                            | Dennd2a       |
| 1433501_at   | 0.87146 | cathepsin O                                               | Ctso          |
| 1433502_s_at | 1.15801 | "TSR1, 20S rRNA accumulation, homolog (yeast)"            | Tsr1          |
| 1433503_at   | 0.81796 | "zinc binding alcohol dehydrogenase, domain containing 1" | Zadh1         |
| 1433504_at   | 0.78168 | brain glycogen phosphorylase                              | Pygb          |
| 1433505_a_at | 0.89919 | leucine rich repeat containing 8D                         | Lrrc8d        |
| 1433506_at   | 1.01227 | leucine rich repeat containing 8D                         | Lrrc8d        |
| 1433507_a_at | 0.91222 | high mobility group nucleosomal binding domain 2          | Hmgn2         |
| 1433508_at   | 1.03557 | Kruppel-like factor 6                                     | Klf6          |
| 1433509_s_at | 1.03005 | receptor accessory protein 1                              | Reep1         |
| 1433510_x_at | 1.07470 | similar to ribosomal protein L36                          | LOC622534     |
| 1433511_at   | 1.05010 | RIKEN cDNA 6330549H03 gene                                | 6330549H03Rik |
| 1433512_at   | 1.06166 | Friend leukemia integration 1                             | Fli1          |
| 1433513_x_at | 0.98847 | "NADH dehydrogenase (ubiquinone) 1 alpha subcomplex, 12"  | Ndufa12       |
| 1433514_at   | 1.04994 | ethanolamine kinase 1                                     | Etnk1         |
| 1433515_s_at | 1.02554 | ethanolamine kinase 1                                     | Etnk1         |
| 1433516_a_at | 0.88251 | myeloma overexpressed 2                                   | Myeov2        |
| 1433517_at   | 0.97538 | myeloma overexpressed 2                                   | Myeov2        |
| 1433518_at   | 0.89360 | leucine carboxyl methyltransferase 2                      | Lcmt2         |

|              |         |                                                                                     |               |
|--------------|---------|-------------------------------------------------------------------------------------|---------------|
| 1433519_at   | 1.07869 | nuclear casein kinase and cyclin-dependent kinase substrate 1                       | Nucks1        |
| 1433520_at   | 0.93147 | SREBP cleavage activating protein                                                   | Scap          |
| 1433521_at   | 0.98207 | ankyrin repeat domain 13c                                                           | Ankrd13c      |
| 1433522_at   | 0.90656 | protein serine kinase H1                                                            | Pskh1         |
| 1433523_at   | 1.09365 | RIKEN cDNA D930005D10 gene                                                          | D930005D10Rik |
| 1433524_at   | 0.84766 | expressed sequence AU042671                                                         | AU042671      |
| 1433525_at   | 0.95937 | endothelin receptor type A                                                          | Ednra         |
| 1433526_at   | 0.88712 | kelch-like 8 (Drosophila)                                                           | Klhl8         |
| 1433527_at   | 0.95250 | iron responsive element binding protein 2                                           | Ireb2         |
| 1433528_at   | 1.05196 | "general transcription factor II A, 2"                                              | Gtf2a2        |
| 1433529_at   | 0.87920 | RIKEN cDNA E430002G05 gene                                                          | E430002G05Rik |
| 1433530_at   | 1.63717 | RIKEN cDNA 2210411K19 gene                                                          | 2210411K19Rik |
| 1433531_at   | 1.34927 | acyl-CoA synthetase long-chain family member 4                                      | Acsl4         |
| 1433532_a_at | 1.12795 | myelin basic protein                                                                | Mbp           |
| 1433533_x_at | 0.94540 | "protein kinase, AMP-activated, gamma 1 non-catalytic subunit"                      | Prkag1        |
| 1433534_a_at | 1.03207 | chaperonin subunit 2 (beta)                                                         | Cct2          |
| 1433535_x_at | 0.98988 | chaperonin subunit 2 (beta)                                                         | Cct2          |
| 1433536_at   | 0.98550 | low density lipoprotein receptor-related protein 11                                 | Lrp11         |
| 1433537_at   | 1.01996 | RIKEN cDNA 4833408C14 gene                                                          | 4833408C14Rik |
| 1433538_at   | 0.86901 | MARVEL (membrane-associating) domain containing 1                                   | Marveld1      |
| 1433539_at   | 1.02321 | COMM domain containing 3                                                            | Commd3        |
| 1433540_x_at | 0.89817 | "protein phosphatase 1, catalytic subunit, beta isoform"                            | Ppp1cb        |
| 1433541_a_at | 1.02119 | ubiquitin associated protein 2-like                                                 | Ubap2l        |
| 1433542_at   | 0.93022 | inositol polyphosphate-5-phosphatase F                                              | Inpp5f        |
| 1433543_at   | 1.11612 | "anillin, actin binding protein (scraps homolog, Drosophila)"                       | Anln          |
| 1433544_at   | 0.95570 | "amyotrophic lateral sclerosis 2 (juvenile) chromosome region, candidate 2 (human)" | Als2cr2       |
| 1433545_s_at | 0.83378 | "acyl-Coenzyme A dehydrogenase family, member 11"                                   | Acad11        |
| 1433546_at   | 1.01480 | glucosamine (N-acetyl)-6-sulfatase                                                  | Gns           |
| 1433547_s_at | 1.12612 | NudC domain containing 1                                                            | Nudcd1        |
| 1433548_at   | 0.99649 | alpha globin regulatory element containing gene                                     | Mare          |
| 1433549_x_at | 0.94813 | ribosomal protein S21                                                               | Rps21         |
| 1433550_at   | 0.99114 | checkpoint with forkhead and ring finger domains                                    | Chfr          |
| 1433551_at   | 0.98669 | expressed sequence AI427515                                                         | AI427515      |
| 1433552_a_at | 0.94316 | polymerase (RNA) II (DNA directed) polypeptide B                                    | Polr2b        |
| 1433553_at   | 0.83368 | GTPase activating RANGAP domain-like 3                                              | Garnl3        |
| 1433554_at   | 0.97088 | expressed sequence AU022870                                                         | AU022870      |
| 1433555_at   | 1.05267 | ELL associated factor 1                                                             | Eaf1          |
| 1433556_at   | 0.87294 | "centaurin, alpha 1"                                                                | Centa1        |
| 1433557_at   | 1.08440 | chromobox homolog 7                                                                 | Cbx7          |
| 1433558_at   | 0.95257 | disabled homolog 2 (Drosophila) interacting protein                                 | Dab2ip        |
| 1433559_at   | 0.92640 | "solute carrier family 45, member 4"                                                | Slc45a4       |
| 1433560_at   | 0.89957 | "solute carrier family 45, member 4"                                                | Slc45a4       |

1433561\_at 1.00083 "centaurin, beta 2" Centb2  
1433562\_s\_at 0.98641 "ATP synthase, H<sup>+</sup> transporting, mitochondrial F0 complex, subunit b, isoform 1" Atp5f1  
1433563\_s\_at 0.95149 "Der1-like domain family, member 1" Der1l  
1433564\_at 0.96535 "diacylglycerol kinase, delta" Dgkd  
1433565\_at 1.04440 PRP38 pre-mRNA processing factor 38 (yeast) domain containing A Prpf38a  
1433566\_at 1.01405 "RAS-like, family 10, member B" Rasl10b  
1433567\_at 1.05454 guanine monophosphate synthetase Gmps  
1433568\_at 0.70061 PAP associated domain containing 4 Papd4  
1433569\_x\_at 1.05871 "RAN, member RAS oncogene family /// similar to RAN, member RAS oncogene family /// similar to RAN, member RAS oncogene family" Ran /// LOC625094 /// LOC671251  
1433570\_s\_at 0.87412 "MAK10 homolog, amino-acid N-acetyltransferase subunit, (S. cerevisiae)" Mak10  
1433571\_at 0.50088 serine incorporator 5 Serinc5  
1433572\_a\_at 1.00237 cDNA sequence BC010304 BC010304  
1433573\_x\_at 0.92018 "protease, serine, 2" Prss2  
1433574\_at 1.16650 cell division cycle 37 homolog (S. cerevisiae)-like 1 Cdc3711  
1433575\_at 0.75850 similar to Transcription factor SOX-4 LOC672274  
1433576\_at 0.99407 "methionine adenosyltransferase II, alpha" Mat2a  
1433577\_at 1.00011 RIKEN cDNA A730017C20 gene A730017C20Rik  
1433578\_at 1.03343 "solute carrier family 10 (sodium/bile acid cotransporter family), member 4" Slc10a4  
1433579\_at 1.02802 transmembrane protein 30B Tmem30b  
1433580\_at 1.02893 nucleoporin 54 Nup54  
1433581\_at 0.70937 RIKEN cDNA 1190002N15 gene 1190002N15Rik  
1433582\_at 0.70602 RIKEN cDNA 1190002N15 gene 1190002N15Rik  
1433583\_at 1.08749 zinc finger protein 365 /// similar to zinc finger protein 365 Zfp365 /// LOC674611  
1433584\_at 0.89018 "tubulin, alpha 1 /// similar to tubulin, alpha 1" Tuba1 /// LOC544863  
1433585\_at 1.09208 transportin 1 Tnpol  
1433586\_at 0.84664 "RGM domain family, member B" Rgmb  
1433587\_at 0.98893 "RGM domain family, member B" Rgmb  
1433588\_at 1.18868 "DNA segment, Chr 6, Wayne State University 116, expressed" D6Wsu116e  
1433589\_at 1.03598 "DNA segment, Chr 6, Wayne State University 116, expressed" D6Wsu116e  
1433590\_at 0.69677 hect domain and RLD 3 Herc3  
1433591\_at 1.06255 "protein phosphatase 3, regulatory subunit B, alpha isoform (calcineurin B, type I)" Ppp3r1  
1433592\_at 0.93184 calmodulin 1 Calm1  
1433593\_at 0.87252 yippee-like 5 (Drosophila) Ypel5  
1433594\_at 0.91735 COMM domain containing 2 Commd2  
1433595\_at 1.01662 --- ---  
1433596\_at 0.99269 "DnaJ (Hsp40) homolog, subfamily C, member 6" Dnajc6  
1433597\_at 1.02368 RIKEN cDNA 9430010O03 gene 9430010O03Rik

1433598\_at 1.30120 RIKEN cDNA 9430010O03 gene 9430010O03Rik  
1433599\_at 1.18621 bromodomain adjacent to zinc finger domain 1A Baz1a  
1433600\_at 1.06334 "adrenergic receptor, alpha 2a" Adra2a  
1433601\_at 0.94542 "adrenergic receptor, alpha 2a" Adra2a  
1433602\_at 1.01308 "gamma-aminobutyric acid (GABA-A) receptor, subunit alpha 5" Gabra5  
1433603\_at 1.03220 NADH dehydrogenase (ubiquinone) Fe-S protein 6 Ndufs6  
1433604\_x\_at 1.13529 "aldolase 1, A isoform" Aldoa  
1433605\_at 0.82290 inositol polyphosphate-5-phosphatase A Inpp5a  
1433606\_at 0.99433 decapping enzyme Dcp1a  
1433607\_at 1.01978 cerebellin 4 precursor protein Cbln4  
1433608\_at 0.94814 sec1 family domain containing 2 Scfd2  
1433609\_s\_at 1.11806 surfet gene 2 Surf2  
1433610\_at 0.79752 expressed sequence AA986860 AA986860  
1433611\_s\_at 1.07056 BUD31 homolog (yeast) Bud31  
1433612\_at 0.99357 "adaptor-related protein complex 2, sigma 1 subunit" Ap2s1  
1433613\_at 1.10255 --- ---  
1433614\_at 0.98042 sorting nexin family member 27 Snx27  
1433615\_at 0.69288 transmembrane protein 117 Tmem117  
1433616\_a\_at 0.93803 RIKEN cDNA 2310028O11 gene 2310028O11Rik  
1433617\_s\_at 1.05164 "UDP-Gal:betaGlcNAc beta 1,4-galactosyltransferase, polypeptide 5"  
B4galt5  
1433618\_at 1.00604 RIKEN cDNA C330006A16 gene C330006A16Rik  
1433619\_at 0.84778 expressed sequence AI894139 AI894139  
1433620\_at 0.90392 WD repeat domain 41 Wdr41  
1433621\_at 0.83931 WD repeat domain 41 Wdr41  
1433622\_at 1.09226 gem (nuclear organelle) associated protein 4 Gemin4  
1433623\_at 0.93332 zinc finger protein 367 Zfp367  
1433624\_at 0.94590 RIKEN cDNA 5830434P21 gene 5830434P21Rik  
1433625\_at 1.02831 RIKEN cDNA 5830434P21 gene 5830434P21Rik  
1433626\_at 1.17431 phospholipid scramblase 4 Plscr4  
1433627\_at 1.02661 Sec23 interacting protein Sec23ip  
1433628\_at 0.95035 coenzyme Q10 homolog A (yeast) Coq10a  
1433629\_s\_at 1.15438 expressed sequence AI316787 AI316787  
1433630\_at 0.94021 MAP6 domain containing 1 Map6d1  
1433631\_at 1.06111 eukaryotic translation initiation factor 5 Eif5  
1433632\_at 0.86498 interferon regulatory factor 2 binding protein 2 /// similar to interferon  
regulatory factor 2 binding protein 2 Irf2bp2 /// LOC672960  
1433633\_at 0.93605 interferon regulatory factor 2 binding protein 2 /// similar to interferon  
regulatory factor 2 binding protein 2 Irf2bp2 /// LOC672960  
1433634\_at 0.86796 interferon regulatory factor 2 binding protein 2 /// similar to interferon  
regulatory factor 2 binding protein 2 Irf2bp2 /// LOC672960  
1433635\_at 1.04134 WD repeat domain 18 Wdr18  
1433636\_at 1.10220 "BMS1-like, ribosome assembly protein (yeast)" Bms11

1433637\_at 0.76709 aarF domain containing kinase 2 Adck2  
1433638\_s\_at 0.99933 homeo box D8 Hoxd8  
1433639\_at 1.02115 RIKEN cDNA 5730593F17 gene 5730593F17Rik  
1433640\_at 0.92767 Far upstream element (FUSE) binding protein 1 Fubp1  
1433641\_at 0.88183 MAD homolog 5 (Drosophila) Smad5  
1433642\_at 0.96002 ADP-ribosylation factor-like 15 Arl15  
1433643\_at 0.93557 "calcium channel, voltage-dependent, alpha2/delta subunit 1" Cacna2d1  
1433644\_at 1.04823 protein-O-mannosyltransferase 2 Pomt2  
1433645\_at 0.87216 RIKEN cDNA 2210409B22 gene 2210409B22Rik  
1433646\_at 1.00115 mitochondrial ribosomal protein S27 Mrps27  
1433647\_s\_at 0.95317 Rho-related BTB domain containing 3 Rhobtb3  
1433648\_at 1.05184 sperm associated antigen 9 Spag9  
1433649\_at 0.82135 "amine oxidase, flavin containing 1" Aof1  
1433650\_at 1.04258 hydroxyacylglutathione hydrolase-like Hagh1  
1433651\_at 0.88706 WT1-interacting protein Wtip  
1433652\_at 0.99892 "immunoglobulin superfamily, member 1" Igsf1  
1433653\_at 0.94533 cDNA sequence BC029169 BC029169  
1433654\_at 0.96459 meningioma expressed antigen 5 (hyaluronidase) Mgea5  
1433655\_at 1.07011 ring finger protein 141 Rnf141  
1433656\_a\_at 1.25772 guanine nucleotide binding protein-like 3 (nucleolar) Gnl3  
1433657\_at 0.89993 RIKEN cDNA A130092J06 gene A130092J06Rik  
1433658\_x\_at 0.99920 poly(rC) binding protein 4 Pcbp4  
1433659\_at 0.93612 Transformation related protein 53 binding protein 1 Trp53bp1  
1433660\_at 1.01384 "DNA segment, Chr 2, ERATO Doi 435, expressed" D2Ertd435e  
1433661\_at 1.08905 cDNA sequence BC034204 BC034204  
1433662\_s\_at 0.86256 tissue inhibitor of metalloproteinase 2 Timp2  
1433663\_s\_at 1.13672 expressed sequence AU014645 AU014645  
1433664\_at 0.96393 ubiquitin-conjugating enzyme E2Q (putative) 2 Ube2q2  
1433665\_at 1.01202 vacuolar protein sorting 41 (yeast) Vps41  
1433666\_s\_at 0.92542 vacuolar protein sorting 41 (yeast) Vps41  
1433667\_at 0.92744 "leucine-rich repeat LGI family, member 3" Lgi3  
1433668\_at 0.92814 proline-rich nuclear receptor coactivator 1 Pnrc1  
1433669\_at 1.04144 A kinase (PRKA) anchor protein 8 Akap8  
1433670\_at 0.90750 epithelial membrane protein 2 Emp2  
1433671\_at 1.03270 RIKEN cDNA A130022J15 gene A130022J15Rik  
1433672\_at 0.85317 RIKEN cDNA 4732479N06 gene 4732479N06Rik  
1433673\_at 0.85140 RIKEN cDNA E130309D14 gene E130309D14Rik  
1433674\_a\_at 1.11418 "small nucleolar RNA, C/D box 22" Snord22  
1433675\_at 1.06156 "small nucleolar RNA, C/D box 22" Snord22  
1433676\_at 0.93732 WNK lysine deficient protein kinase 1 Wnk1  
1433677\_at 0.97091 "splicing factor, arginine/serine-rich 8" Sfrs8  
1433678\_at 0.86504 "phospholipase D family, member 4" Pld4  
1433679\_at 1.04907 far upstream element (FUSE) binding protein 3 Fubp3

1433680\_x\_at 1.06686 Cd27 binding protein (Hindu God of destruction) Siva  
1433681\_x\_at 0.90609 calpain 3 Capn3  
1433682\_at 0.99240 Rho guanine nucleotide exchange factor (GEF) 17 Arhgef17  
1433683\_at 0.96232 RNA binding motif protein 35b Rbm35b  
1433684\_at 1.17676 chromatin modifying protein 6 Chmp6  
1433685\_a\_at 0.93372 RIKEN cDNA C330011F01 gene /// RIKEN cDNA 6430706D22 gene  
C330011F01Rik /// 6430706D22Rik  
1433686\_at 0.94619 calcineurin binding protein 1 Cabin1  
1433687\_at 0.81247 expressed sequence AI662250 AI662250  
1433688\_x\_at 1.13182 ribosomal protein L14 Rpl14  
1433689\_s\_at 1.04423 ribosomal protein S9 Rps9  
1433690\_at 0.91925 RIKEN cDNA 2210016L21 gene 2210016L21Rik  
1433691\_at 0.96062 "protein phosphatase 1, regulatory (inhibitor) subunit 3C" Ppp1r3c  
1433692\_at 1.12674 N-acetyltransferase 10 Nat10  
1433693\_x\_at 0.88769 vesicle-associated membrane protein 3 Vamp3  
1433694\_at 0.79548 "phosphodiesterase 3B, cGMP-inhibited" Pde3b  
1433695\_at 0.98192 RIKEN cDNA 1500041B16 gene 1500041B16Rik  
1433696\_at 0.92189 "DNA segment, Chr 17, ERATO Doi 441, expressed" D17Ertd441e  
1433697\_at 1.04886 expressed sequence AV312086 AV312086  
1433698\_a\_at 1.08553 thioredoxin-like 4 Txnl4  
1433699\_at 1.48027 "tumor necrosis factor, alpha-induced protein 3" Tnfaip3  
1433700\_at 0.99953 RIKEN cDNA 4933433P14 gene 4933433P14Rik  
1433701\_at 0.97446 metallophosphoesterase domain containing 1 Mpped1  
1433702\_at 0.91917 "DNA segment, Chr 19, Wayne State University 12, expressed" D19Wsu12e  
1433703\_s\_at 1.02302 bromo adjacent homology domain containing 1 Bahd1  
1433704\_s\_at 0.87470 translocation protein 1 Tloc1  
1433705\_at 0.82652 zinc finger protein 213 Zfp213  
1433706\_a\_at 0.96588 protein tyrosine phosphatase-like A domain containing 1 Ptplad1  
1433707\_at 1.00014 "gamma-aminobutyric acid (GABA-A) receptor, subunit alpha 4" Gabra4  
1433708\_at 1.01024 signal recognition particle 68 Srp68  
1433709\_at 0.96471 calcium activated nucleotidase 1 Cant1  
1433710\_at 0.93546 enhancer of mRNA decapping 3 homolog (S. cerevisiae) Edc3  
1433711\_s\_at 0.86198 sestrin 1 Sesn1  
1433712\_at 0.96693 expressed sequence AW555464 AW555464  
1433713\_at 0.97418 GCN1 general control of amino-acid synthesis 1-like 1 (yeast) Gcn111  
1433714\_at 0.95284 "sulfotransferase family 4A, member 1" Sult4a1  
1433715\_at 0.93958 copine VII Cpne7  
1433716\_x\_at 1.03696 glial cell line derived neurotrophic factor family receptor alpha 2 Gfra2  
1433717\_at 0.96503 "DNA segment, Chr 19, Wayne State University 162, expressed" D19Wsu162e  
1433718\_a\_at 0.95100 chromobox homolog 1 (Drosophila HP1 beta) Cbx1  
1433719\_at 0.92723 "solute carrier family 9 (sodium/hydrogen exchanger), isoform 9" Slc9a9  
1433720\_s\_at 0.80132 Nur77 downstream gene 2 Ndg2  
1433721\_x\_at 0.96180 ribosomal protein S21 Rps21



1433722\_at 1.01056 A kinase (PRKA) anchor protein 13 Akap13  
1433723\_s\_at 0.89779 small EDRK-rich factor 2 Serf2  
1433724\_at 0.96871 "DNA segment, Chr 15, ERATO Doi 621, expressed" D15Ertd621e  
1433725\_at 0.89631 "activin A receptor, type 1B" Acvr1b  
1433726\_at 0.92888 --- ---  
1433727\_at 0.96590 cDNA sequence BC038479 BC038479  
1433728\_at 0.98458 cDNA sequence BC038479 BC038479  
1433729\_x\_at 0.99104 peptidase (mitochondrial processing) beta Pmpcb  
1433730\_at 0.82762 ELMO domain containing 2 Elmod2  
1433731\_at 0.96832 insulin-like growth factor 2 mRNA binding protein 3 Igf2bp3  
1433732\_x\_at 1.03943 insulin-like growth factor 2 mRNA binding protein 3 Igf2bp3  
1433733\_a\_at 1.00086 cryptochrome 1 (photolyase-like) Cry1  
1433734\_at 0.87111 "solute carrier family 13 (sodium/sulfate symporters), member 4" Slc13a4  
1433735\_a\_at 0.71082 transmembrane protein 64 Tmem64  
1433736\_at 0.96699 host cell factor C1 Hcfc1  
1433737\_at 1.02250 similar to U2AF homology motif (UHM) kinase 1 LOC677213  
1433738\_at 1.08795 RIKEN cDNA 5730445M16 gene 5730445M16Rik  
1433739\_at 1.04094 nucleolar protein 10 Nol10  
1433740\_at 0.91870 RIKEN cDNA 2610301K12 gene 2610301K12Rik  
1433741\_at 0.90844 CD38 antigen Cd38  
1433742\_at 0.60065 ankyrin repeat domain 15 Ankrd15  
1433743\_at 0.93985 dachshund 1 (Drosophila) Dach1  
1433744\_at 1.17903 expressed sequence AI841794 AI841794  
1433745\_at 0.99580 triple functional domain (PTPRF interacting) Trio  
1433746\_at 0.98351 WD repeat domain 3 Wdr3  
1433747\_at 1.05755 leucyl/cystinyl aminopeptidase Lnpep  
1433748\_at 0.99146 "zinc finger, DHHC domain containing 18" Zdhhc18  
1433749\_at 1.06778 "guanine nucleotide binding protein, alpha 13" Gna13  
1433750\_at 1.03718 "solute carrier family 31, member 1" Slc31a1  
1433751\_at 0.98587 "solute carrier family 39 (zinc transporter), member 10" Slc39a10  
1433752\_s\_at 0.89705 RIKEN cDNA D030016E14 gene D030016E14Rik  
1433753\_x\_at 0.93495 Era (G-protein)-like 1 (E. coli) Era1  
1433754\_at 0.97459 muscleblind-like 2 Mbnl2  
1433755\_at 1.19158 mesoderm induction early response 1 homolog (Xenopus laevis) Mier1  
1433756\_at 1.12097 S100P binding protein S100pbp  
1433757\_a\_at 1.12804 nischarin Nisch  
1433758\_at 1.23831 nischarin Nisch  
1433759\_at 1.09928 dpy-19-like 1 (C. elegans) Dpy191  
1433760\_a\_at 1.06006 rhomboid domain containing 3 Rhbdd3  
1433761\_at 0.85211 phosphodiesterase 4D interacting protein (myomegalin) Pde4dip  
1433762\_at 0.83800 RIKEN cDNA C630043F03 gene C630043F03Rik  
1433763\_at 0.86691 ectonucleoside triphosphate diphosphohydrolase 5 Entpd5  
1433764\_at 1.04028 "C-type lectin domain family, member 1 /// similar to CD69 antigen (p60, early

T-cell activation antigen)" Clec2l /// LOC665180

1433765\_at 0.96846 ubiquitin-conjugating enzyme E2o Ube2o

1433766\_at 1.04685 RIKEN cDNA C330023M02 gene C330023M02Rik

1433767\_at 1.12325 RIKEN cDNA 1110018G07 gene 1110018G07Rik

1433768\_at 0.84505 "palladin, cytoskeletal associated protein" Palld

1433769\_at 1.43274 ALS2 C-terminal like Als2cl

1433770\_at 0.95486 dihydropyrimidinase-like 2 Dpysl2

1433771\_at 0.90635 RIKEN cDNA 5730446C15 gene 5730446C15Rik

1433772\_at 0.96663 "stress 70 protein chaperone, microsomal-associated, human homolog" Stch

1433773\_at 0.86205 ribonucleotide reductase M2 B (TP53 inducible) Rrm2b

1433774\_x\_at 1.02795 component of oligomeric golgi complex 1 Cog1

1433775\_at 1.19076 expressed sequence C77080 C77080

1433776\_at 1.02084 lipoma HMGIC fusion partner Lhfp

1433777\_at 0.97909 l(3)mbt-like 2 (Drosophila) L3mbtl2

1433778\_at 0.93691 "tankyrase, TRF1-interacting ankyrin-related ADP-ribose polymerase" Tnks

1433779\_at 1.00685 cancer susceptibility candidate 4 Casc4

1433780\_at 1.00570 ubinuclein 1 Ubn1

1433781\_a\_at 1.04150 claudin 12 Cldn12

1433782\_at 1.03817 claudin 12 Cldn12

1433783\_at 1.01276 LIM domain binding 3 Ldb3

1433784\_at 0.97351 expressed sequence AI265322 AI265322

1433785\_at 1.02456 myelin-associated oligodendrocytic basic protein Mobp

1433786\_x\_at 0.96958 small EDRK-rich factor 2 Serf2

1433787\_at 0.92798 NEL-like 1 (chicken) Nell1

1433788\_at 1.01736 neurexin III Nrnx3

1433789\_at 1.12427 "small nucleolar RNA host gene (non-protein coding) 3 /// similar to RNA, U17d small nucleolar" Snhg3 /// LOC670438

1433790\_at 0.99145 trophinin associated protein Troap

1433791\_at 0.93276 "RAB9B, member RAS oncogene family" Rab9b

1433792\_at 0.84690 nuclear receptor interacting protein 2 Nrip2

1433793\_s\_at 0.89029 nuclear receptor interacting protein 2 Nrip2

1433794\_at 0.97570 senataxin Setx

1433795\_at 0.95702 "transforming growth factor, beta receptor III" Tgfbr3

1433796\_at 1.00565 endonuclease domain containing 1 Endod1

1433797\_at 1.00062 RIKEN cDNA E130309D02 gene E130309D02Rik

1433798\_a\_at 1.07126 RIKEN cDNA E330034G19 gene E330034G19Rik

1433799\_at 0.92037 retinol dehydrogenase 13 (all-trans and 9-cis) Rdh13

1433800\_a\_at 0.94773 pro-opiomelanocortin-alpha Pomc1

1433801\_at 1.08226 RIKEN cDNA 9930012K11 gene 9930012K11Rik

1433802\_at 0.84185 transmembrane protein 151 Tmem151

1433803\_at 0.92450 Janus kinase 1 Jak1

1433804\_at 0.88564 Janus kinase 1 Jak1

1433805\_at 1.00316 Janus kinase 1 Jak1

1433806\_x\_at 0.96494 calreticulin Calr  
1433807\_at 0.93678 RIKEN cDNA 6720463M24 gene 6720463M24Rik  
1433808\_at 0.93110 RIKEN cDNA D330001F17 gene D330001F17Rik  
1433809\_at 0.86798 DEAD (Asp-Glu-Ala-Asp) box polypeptide 5 Ddx5  
1433810\_x\_at 0.83048 DEAD (Asp-Glu-Ala-Asp) box polypeptide 5 Ddx5  
1433811\_at 0.90105 similar to myeloid/lymphoid or mixed lineage-leukemia translocation to 6 homolog /// similar to myeloid/lymphoid or mixed lineage-leukemia translocation to 6 homolog  
LOC639490 /// LOC669933  
1433812\_at 1.01139 Lix1-like Lix1l  
1433813\_at 0.89096 transmembrane protein 48 Tmem48  
1433814\_at 0.91246 Wingless-related MMTV integration site 5B Wnt5b  
1433815\_at 0.79796 janus kinase and microtubule interacting protein 1 Jakmip1  
1433816\_at 0.99540 mitochondrial carrier triple repeat 1 Mcart1  
1433817\_at 0.96872 1-acylglycerol-3-phosphate O-acyltransferase 3 Agpat3  
1433818\_at 0.83193 1-acylglycerol-3-phosphate O-acyltransferase 3 Agpat3  
1433819\_s\_at 0.96023 1-acylglycerol-3-phosphate O-acyltransferase 3 Agpat3  
1433820\_a\_at 0.93634 RIKEN cDNA 1110012D08 gene 1110012D08Rik  
1433821\_at 0.98040 RIKEN cDNA 1110012D08 gene 1110012D08Rik  
1433822\_x\_at 0.91336 anaphase-promoting complex subunit 5 Anapc5  
1433823\_at 0.91465 expressed sequence AW456874 AW456874  
1433824\_x\_at 0.97351 G-rich RNA sequence binding factor 1 Grsf1  
1433825\_at 1.03042 "Neurotrophic tyrosine kinase, receptor, type 3" Ntrk3  
1433826\_at 0.90205 TSPY-like 3 Tspyl3  
1433827\_at 0.88028 "ATPase, aminophospholipid transporter (APLT), class I, type 8A, member 1" Atp8a1  
1433828\_at 0.93958 "ATPase, aminophospholipid transporter (APLT), class I, type 8A, member 1" Atp8a1  
1433829\_a\_at 1.13863 heterogeneous nuclear ribonucleoprotein A2/B1 Hnrpa2b1  
1433830\_at 0.97318 heterogeneous nuclear ribonucleoprotein A2/B1 Hnrpa2b1  
1433831\_at 1.10285 RIKEN cDNA 4833418A01 gene 4833418A01Rik  
1433832\_at 0.97999 unc-84 homolog B (C. elegans) Unc84b  
1433833\_at 0.89305 fibronectin type III domain containing 3B Fndc3b  
1433834\_at 0.88803 membrane-associated ring finger (C3HC4) 6 6-Mar  
1433835\_at 0.92006 "protein phosphatase 3, catalytic subunit, beta isoform" Ppp3cb  
1433836\_a\_at 0.98729 RIKEN cDNA 8430408G22 gene 8430408G22Rik  
1433837\_at 1.01672 RIKEN cDNA 8430408G22 gene 8430408G22Rik  
1433838\_at 0.99937 aspartyl-tRNA synthetase 2 (mitochondrial) Dars2  
1433839\_at 1.09498 asparaginyl-tRNA synthetase 2 (mitochondrial)(putative) Nars2  
1433840\_a\_at 0.98073 KIAA0415 protein KIAA0415  
1433841\_at 0.98158 KIAA0415 protein KIAA0415  
1433842\_at 1.06849 leucine rich repeat (in FLII) interacting protein 1 Lrrfip1  
1433843\_at 1.08772 HS1 binding protein 3 Hs1bp3  
1433844\_a\_at 1.03892 dual specificity phosphatase 9 Dusp9

1433845\_x\_at 1.25387 dual specificity phosphatase 9 Dusp9  
1433846\_s\_at 1.03881 RIKEN cDNA C430003P19 gene C430003P19Rik  
1433847\_at 0.93344 RIKEN cDNA D330017J20 gene D330017J20Rik  
1433848\_at 0.99129 cell division cycle 27 homolog (S. cerevisiae) Cdc27  
1433849\_at 0.92512 cell division cycle 27 homolog (S. cerevisiae) Cdc27  
1433850\_at 1.08414 "protein phosphatase 4, regulatory subunit 2 /// similar to protein phosphatase 4, regulatory subunit 2" Ppp4r2 /// LOC627908  
1433851\_at 0.95735 "protein phosphatase 4, regulatory subunit 2" Ppp4r2  
1433852\_at 0.87768 RIKEN cDNA C330002I19 gene C330002I19Rik  
1433853\_at 0.96913 mindbomb homolog 1 (Drosophila) Mib1  
1433854\_at 0.90390 transmembrane protein 164 Tmem164  
1433855\_at 1.00996 4-aminobutyrate aminotransferase Abat  
1433856\_at 0.99903 histidine acid phosphatase domain containing 1 Hisppd1  
1433857\_at 0.95947 fat tumor suppressor homolog (Drosophila) /// similar to fat tumor suppressor homolog Fath /// LOC672128  
1433858\_at 1.13865 leucine rich repeat containing 28 Lrrc28  
1433859\_at 0.99918 RIKEN cDNA D030070L09 gene D030070L09Rik  
1433860\_at 1.02020 RIKEN cDNA 6030458C11 gene 6030458C11Rik  
1433861\_at 1.07156 coiled-coil and C2 domain containing 1B Cc2d1b  
1433862\_at 1.03039 extra spindle poles-like 1 (S. cerevisiae) Esp11  
1433863\_at 0.89031 basic transcription factor 3 /// similar to basic transcription factor 3 /// similar to basic transcription factor 3 /// similar to basic transcription factor 3 Btf3 /// LOC640665 /// LOC665385 /// LOC677433  
1433864\_at 0.86091 low density lipoprotein-related protein 12 Lrp12  
1433865\_at 1.08023 RIKEN cDNA E330016L19 gene /// RIKEN cDNA E330010L02 gene E330016L19Rik /// E330010L02Rik  
1433866\_x\_at 1.00271 peroxiredoxin 1 Prdx1  
1433867\_at 1.00508 RIKEN cDNA 1810030O07 gene 1810030O07Rik  
1433868\_at 1.00437 BTB (POZ) domain containing 3 Btbd3  
1433869\_at 1.04774 ZXD family zinc finger C Zxdc  
1433870\_at 0.97558 "ATPase family, AAA domain containing 4" Atad4  
1433871\_at 1.00785 R3H domain 1 (binds single-stranded nucleic acids) R3hdm1  
1433872\_at 0.98614 RIKEN cDNA 2410042D21 gene 2410042D21Rik  
1433873\_s\_at 0.96718 pericentrin (kendrin) Pcnt  
1433874\_at 1.00898 slingshot homolog 1 (Drosophila) Ssh1  
1433875\_at 0.94407 RIKEN cDNA 4732418C07 gene 4732418C07Rik  
1433876\_at 0.99466 leucine rich repeat containing 24 Lrrc24  
1433877\_at 1.11690 RIKEN cDNA 4732473B16 gene 4732473B16Rik  
1433878\_at 1.02095 mitochondrial ribosomal protein S26 Mrps26  
1433879\_a\_at 1.03386 RIKEN cDNA C130032J12 gene C130032J12Rik  
1433880\_at 1.13092 "DnaJ (Hsp40) homolog, subfamily C, member 11" Dnajc11  
1433881\_at 0.91726 "DnaJ (Hsp40) homolog, subfamily C, member 11" Dnajc11  
1433882\_at 1.02357 "CCR4-NOT transcription complex, subunit 10" Cnot10

1433883\_at 0.88411 tropomyosin 4 Tpm4  
1433884\_at 1.01431 synaptotagmin I Syt1  
1433885\_at 0.86849 IQ motif containing GTPase activating protein 2 Iqgap2  
1433886\_at 1.11724 "eukaryotic translation initiation factor 2B, subunit 5 epsilon" Eif2b5  
1433887\_at 0.84364 "DnaJ (Hsp40) homolog, subfamily C, member 3" Dnajc3  
1433888\_at 0.88389 "ATPase, Ca++ transporting, plasma membrane 2" Atp2b2  
1433889\_at 1.01663 SRY-box containing gene 9 Sox9  
1433890\_a\_at 1.00748 HLA-B-associated transcript 3 Bat3  
1433891\_at 0.80428 leucine-rich repeat-containing G protein-coupled receptor 4 /// similar to  
Leucine-rich repeat-containing G-protein coupled receptor 4 precursor Lgr4 /// LOC669588  
1433892\_at 1.04151 sperm associated antigen 5 Spag5  
1433893\_s\_at 1.10088 sperm associated antigen 5 Spag5  
1433894\_at 0.80116 expressed sequence AI591476 AI591476  
1433895\_at 0.99209 transmembrane protein 127 Tmem127  
1433896\_at 0.94299 transmembrane protein 127 Tmem127  
1433897\_at 0.94784 expressed sequence AI597468 AI597468  
1433898\_at 1.02089 Expressed sequence AV025504 AV025504  
1433899\_x\_at 0.86741 "TSC22 domain family, member 1" Tsc22d1  
1433900\_at 1.07268 RIKEN cDNA 0610007L01 gene 0610007L01Rik  
1433901\_at 0.91377 GPI-anchored membrane protein 1 Gpiap1  
1433902\_at 1.11780 kelch repeat and BTB (POZ) domain containing 8 Kbtbd8  
1433903\_at 0.94723 expressed sequence AU021838 AU021838  
1433904\_at 1.04023 gametogenetin binding protein 1 Ggnbp1  
1433905\_at 0.95692 A kinase (PRKA) anchor protein 7 Akap7  
1433906\_at 1.00013 RIKEN cDNA 4933402J24 gene 4933402J24Rik  
1433907\_at 0.95782 Pbx/knotted 1 homeobox 2 Pknox2  
1433908\_a\_at 0.97504 cortactin Ctn  
1433909\_at 0.91800 synaptotagmin XVII Syt17  
1433910\_at 0.96902 "zinc finger, CCHC domain containing 6" Zcchc6  
1433911\_at 0.87572 "Smg-6 homolog, nonsense mediated mRNA decay factor (C. elegans)"  
Smg6  
1433912\_at 0.99963 "TIP41, TOR signalling pathway regulator-like (S. cerevisiae)" Tipr1  
1433913\_at 0.87824 expressed sequence C80913 C80913  
1433914\_at 1.07446 expressed sequence AI747699 AI747699  
1433915\_s\_at 1.14352 epsin 2 Epn2  
1433916\_at 0.93137 vesicle-associated membrane protein 3 Vamp3  
1433917\_x\_at 0.77914 "DNA segment, Chr 2, Brigham & Women's Genetics 1423 expressed"  
D2Bwg1423e  
1433918\_at 0.99152 autophagy-related 4D (yeast) Atg4d  
1433919\_at 1.02786 ankyrin repeat and SOCS box-containing protein 4 Asb4  
1433920\_at 0.87324 "sema domain, immunoglobulin domain (Ig), transmembrane domain (TM) and  
short cytoplasmic domain, (semaphorin) 4C" Sema4c  
1433921\_s\_at 0.98923 "zinc finger, CSL domain containing 2" Zcs12

|              |         |                                                               |               |
|--------------|---------|---------------------------------------------------------------|---------------|
| 1433922_at   | 0.98126 | "RAB35, member RAS oncogene family"                           | Rab35         |
| 1433923_at   | 1.07476 | keratin 77                                                    | Krt77         |
| 1433924_at   | 0.99754 | paternally expressed 3                                        | Peg3          |
| 1433925_at   | 0.84752 | "dynein, cytoplasmic 1 light intermediate chain 2"            | Dync1li2      |
| 1433926_at   | 0.98178 | "dynein, cytoplasmic 1 light intermediate chain 2"            | Dync1li2      |
| 1433927_at   | 1.05266 | ubiquitin specific peptidase like 1                           | Usp11         |
| 1433928_a_at | 1.07553 | ribosomal protein L13a                                        | Rpl13a        |
| 1433929_at   | 0.93370 | NHL repeat containing 2                                       | Nhlrc2        |
| 1433930_at   | 1.43590 | Heparanase                                                    | Hpse          |
| 1433931_at   | 0.93230 | RIKEN cDNA C030046I01 gene                                    | C030046I01Rik |
| 1433932_x_at | 0.94725 | RIKEN cDNA C030046I01 gene                                    | C030046I01Rik |
| 1433933_s_at | 0.95372 | "solute carrier organic anion transporter family, member 2b1" | Slco2b1       |
| 1433934_at   | 1.03860 | "SEC24 related gene family, member A (S. cerevisiae)"         | Sec24a        |
| 1433935_at   | 1.18119 | expressed sequence AU020206                                   | AU020206      |
| 1433936_at   | 1.02036 | RIKEN cDNA 0610010E21 gene                                    | 0610010E21Rik |
| 1433937_at   | 0.94923 | transformation related protein 53 binding protein 2           | Trp53bp2      |
| 1433938_at   | 0.82946 | transformation related protein 53 binding protein 2           | Trp53bp2      |
| 1433939_at   | 0.73250 | hypothetical protein A730046J16                               | A730046J16    |
| 1433940_at   | 1.15210 | sperm associated antigen 7                                    | Spag7         |
| 1433941_at   | 0.96295 | "phosphatidylinositol (4,5) bisphosphate 5-phosphatase, A"    | Pib5pa        |
| 1433942_at   | 0.96335 | myosin VI                                                     | Myo6          |
| 1433943_at   | 0.95053 | cDNA sequence BC063749                                        | BC063749      |
| 1433944_at   | 1.16606 | HECT domain containing 2                                      | Hectd2        |
| 1433945_at   | 1.04496 | RIKEN cDNA 5730507A09 gene                                    | 5730507A09Rik |
| 1433946_at   | 0.86857 | zinc finger protein interacting with K protein 1              | Zik1          |
| 1433947_at   | 1.04476 | "RAB37, member of RAS oncogene family"                        | Rab37         |
| 1433948_at   | 1.21337 | "Phospholipase A2, group IB, pancreas"                        | Pla2g1b       |
| 1433949_x_at | 0.94332 | "phospholipase A2, group IB, pancreas"                        | Pla2g1b       |
| 1433950_at   | 1.06241 | "immunoglobulin superfamily, member 21"                       | Igsf21        |
| 1433951_at   | 0.89842 | ADP-ribosylation factor-like 5A                               | Arl5a         |
| 1433952_at   | 1.01353 | "Tu translation elongation factor, mitochondrial"             | Tufm          |
| 1433953_at   | 0.90161 | zinc finger protein 277                                       | Zfp277        |
| 1433954_at   | 0.94067 | RIKEN cDNA 4632419I22 gene                                    | 4632419I22Rik |
| 1433955_at   | 0.98679 | bromodomain and WD repeat domain containing 1                 | Brwd1         |
| 1433956_at   | 1.11538 | cadherin 5                                                    | Cdh5          |
| 1433957_at   | 0.78702 | RIKEN cDNA C030048B08 gene                                    | C030048B08Rik |
| 1433958_at   | 0.84810 | "centrobin, centrosomal BRCA2 interacting protein"            | Cntrob        |
| 1433959_at   | 0.91207 | "zinc finger, matrin type 4"                                  | Zmat4         |
| 1433960_at   | 1.06630 | interferon stimulated exonuclease gene 20-like 2              | Isg20l2       |
| 1433961_at   | 0.95729 | cDNA sequence BC023814                                        | BC023814      |
| 1433962_at   | 1.05131 | RIKEN cDNA 6720458F09 gene                                    | 6720458F09Rik |
| 1433963_a_at | 1.04442 | cDNA sequence BC032204                                        | BC032204      |
| 1433964_s_at | 1.08030 | cDNA sequence BC032204                                        | BC032204      |

1433965\_at 0.84131 "ATPase, aminophospholipid transporter (APLT), class I, type 8A, member 1" Atp8a1  
 1433966\_x\_at 1.01231 asparagine synthetase Asns  
 1433967\_at 1.07861 similar to RIKEN cDNA 5430413K10 LOC433492  
 1433968\_a\_at 0.91563 --- ---  
 1433969\_at 1.04215 expressed sequence AU067824 AU067824  
 1433970\_at 1.02005 bolA-like 3 (E. coli) Bola3  
 1433971\_at 0.84533 calmodulin binding transcription activator 1 Camta1  
 1433972\_at 0.86057 calmodulin binding transcription activator 1 Camta1  
 1433973\_at 1.05016 selenophosphate synthetase 1 Sephs1  
 1433974\_at 1.06452 selenophosphate synthetase 1 Sephs1  
 1433975\_at 0.90313 cyclin-dependent kinase (CDC2-like) 10 Cdk10  
 1433976\_at 1.08837 "DNA segment, Chr 10, University of California at Los Angeles 1" D10Ucla1  
 1433977\_at 1.04407 heparan sulfate (glucosamine) 3-O-sulfotransferase 3B1 Hs3st3b1  
 1433978\_at 0.96819 RIKEN cDNA 4930430F08 gene 4930430F08Rik  
 1433979\_at 0.97344 "RNA binding motif, single stranded interacting protein 2" Rbms2  
 1433980\_at 0.99409 "HIV-1 tat interactive protein, homolog (human)" Htatip  
 1433981\_s\_at 0.91082 "HIV-1 tat interactive protein, homolog (human)" Htatip  
 1433982\_at 0.97978 ubiquitin specific peptidase 28 Usp28  
 1433983\_at 0.92216 Cnksr family member 3 Cnksr3  
 1433984\_a\_at 0.98119 "malate dehydrogenase 2, NAD (mitochondrial)" Mdh2  
 1433985\_at 0.93453 abl-interactor 2 Abi2  
 1433986\_at 0.97642 cDNA sequence BC024659 BC024659  
 1433987\_at 1.12313 hippocalcin-like 4 Hpcal4  
 1433988\_s\_at 0.92855 RIKEN cDNA C230098O21 gene C230098O21Rik  
 1433989\_at 1.12201 "solute carrier family 6 (neurotransmitter transporter, GABA), member 11" Slc6a11  
 1433990\_at 0.97307 lipoma HMGIC fusion partner-like 3 Lhfpl3  
 1433991\_x\_at 1.09534 diazepam binding inhibitor Dbi  
 1433992\_at 1.06690 shroom family member 2 /// similar to Apical-like protein (APXL protein) Shroom2 /// LOC670546  
 1433993\_at 0.93352 RIKEN cDNA 4931406P16 gene 4931406P16Rik  
 1433994\_at 1.11152 RIKEN cDNA 4931406P16 gene 4931406P16Rik  
 1433995\_s\_at 1.00105 "DNA segment, Chr 16, Brigham & Women's Genetics 1543 expressed" D16Bwg1543e  
 1433996\_at 1.02874 suppressor of variegation 3-9 homolog 2 (Drosophila) Suv39h2  
 1433997\_at 0.90510 RIKEN cDNA 2410127E18 gene 2410127E18Rik  
 1433998\_at 1.02875 RIKEN cDNA 4933427D14 gene 4933427D14Rik  
 1433999\_at 1.01072 STE20-like kinase (yeast) Slk  
 1434000\_at 0.99531 v-Ki-ras2 Kirsten rat sarcoma viral oncogene homolog Kras  
 1434001\_at 1.11491 tetratricopeptide repeat domain 9C Ttc9c  
 1434002\_at 0.79028 checkpoint suppressor 1 Ches1

1434003\_a\_at 1.02865 deoxyhypusine synthase Dhps  
1434004\_at 1.07436 deoxyhypusine synthase Dhps  
1434005\_at 1.01662 "RNA binding motif, single stranded interacting protein 1" Rbms1  
1434006\_at 0.94129 cDNA sequence BC051227 BC051227  
1434007\_at 1.01170 glycosyltransferase-like 1B Gylt1b  
1434008\_at 0.95713 "sodium channel, type IV, beta" Scn4b  
1434009\_at 1.04157 glucocorticoid receptor DNA binding factor 1 Grfl1  
1434010\_at 1.10301 "amyotrophic lateral sclerosis 2 (juvenile) chromosome region, candidate 13 (human)" Als2cr13  
1434011\_a\_at 0.96665 integrator complex subunit 5 Ints5  
1434012\_at 0.93946 integrator complex subunit 5 Ints5  
1434013\_at 0.88535 "actin binding LIM protein family, member 3" Ablim3  
1434014\_at 0.95684 autophagy-related 4C (yeast) Atg4c  
1434015\_at 1.30424 "solute carrier family 2 (facilitated glucose transporter), member 6" Slc2a6  
1434016\_at 1.05560 zinc and ring finger 2 Znrf2  
1434017\_at 0.92229 --- ---  
1434018\_at 0.98454 cDNA sequence BC043098 BC043098  
1434019\_at 0.99519 PDGFA associated protein 1 Pdap1  
1434020\_at 1.11331 PDGFA associated protein 1 Pdap1  
1434021\_at 0.97709 RIKEN cDNA C230096C10 gene C230096C10Rik  
1434022\_at 0.86362 zinc finger and BTB domain containing 33 Zbtb33  
1434023\_at 0.84973 expressed sequence AU016693 AU016693  
1434024\_at 0.89492 nephronophthisis 4 (juvenile) homolog (human) Nphp4  
1434025\_at 1.25272 --- ---  
1434026\_at 0.86837 "Atpase, class I, type 8B, member 2" Atp8b2  
1434027\_at 0.84851 Down syndrome critical region gene 1-like 2 Dscr112  
1434028\_at 0.87185 aryl hydrocarbon receptor nuclear translocator 2 Arnt2  
1434029\_at 0.93028 RIKEN cDNA 2410025L10 gene 2410025L10Rik  
1434030\_at 0.97500 cDNA sequence BC034507 BC034507  
1434031\_at 1.20831 zinc finger protein 692 Zfp692  
1434032\_at 0.83324 --- ---  
1434033\_at 0.86225 "transducin-like enhancer of split 1, homolog of Drosophila E(spl)" Tle1  
1434034\_at 0.73468 ceramide kinase CerK  
1434035\_at 0.96019 "DnaJ (Hsp40) homolog, subfamily B, member 6" Dnajb6  
1434036\_at 0.95522 metastasis suppressor 1 Mtss1  
1434037\_s\_at 0.98696 p300/CBP-associated factor Pcaf  
1434038\_at 1.23445 "DnaJ (Hsp40) homolog, subfamily C, member 13" Dnajc13  
1434039\_at 0.92440 amyloid beta precursor protein (cytoplasmic tail) binding protein 2 Appbp2  
1434040\_at 0.98945 amyloid beta precursor protein (cytoplasmic tail) binding protein 2 Appbp2  
1434041\_at 1.02909 amyloid beta precursor protein (cytoplasmic tail) binding protein 2 Appbp2  
1434042\_s\_at 1.01281 myotubularin related protein 3 Mtmr3  
1434043\_a\_at 0.90421 --- ---  
1434044\_at 0.81526 replication initiator 1 Repin1



1434045\_at 0.93281 cyclin-dependent kinase inhibitor 1B Cdkn1b  
1434046\_at 0.88778 expressed sequence AA467197 AA467197  
1434047\_x\_at 1.07504 heterogeneous nuclear ribonucleoprotein A2/B1 Hnrpa2b1  
1434048\_at 0.84682 RIKEN cDNA 4930471M23 gene 4930471M23Rik  
1434049\_at 0.91650 ectonucleoside triphosphate diphosphohydrolase 3 Entpd3  
1434050\_at 0.93794 expressed sequence AI315068 AI315068  
1434051\_s\_at 0.86394 heat shock protein 12A Hspa12a  
1434052\_at 1.10309 expressed sequence AI593442 AI593442  
1434053\_x\_at 0.75657 "ATP synthase, H+ transporting, mitochondrial F1F0 complex, subunit e"  
Atp5k  
1434054\_at 1.18421 "v-maf musculoaponeurotic fibrosarcoma oncogene family, protein G  
(avian)" Mafg  
1434055\_at 1.01334 UDP-N-acetyl-alpha-D-galactosamine:polypeptide N-  
acetylgalactosaminyltransferase 9 Galnt9  
1434056\_a\_at 0.91461 "NADH dehydrogenase (ubiquinone) 1 beta subcomplex, 6" Ndufb6  
1434057\_at 0.96188 "NADH dehydrogenase (ubiquinone) 1 beta subcomplex, 6" Ndufb6  
1434058\_at 1.10293 Vmyotubularin related protein 12 Mtmr12  
1434059\_at 0.89622 RIKEN cDNA B230312A22 gene B230312A22Rik  
1434060\_at 1.03373 hect (homologous to the E6-AP (UBE3A) carboxyl terminus) domain and  
RCC1 (CHC1)-like domain (RLD) 1 Herc1  
1434061\_at 1.01540 retinitis pigmentosa 2 homolog (human) Rp2h  
1434062\_at 0.99648 RAB GTPase activating protein 1-like Rabgap11  
1434063\_at 1.02335 zinc finger protein 664 Zfp664  
1434064\_at 0.94101 transmembrane protein 142C Tmem142c  
1434065\_at 1.03804 "CWF19-like 1, cell cycle control (S. pombe)" Cwf1911  
1434066\_at 0.97287 general transcription factor III C 1 Gtf3c1  
1434067\_at 1.01836 expressed sequence AI662270 AI662270  
1434068\_s\_at 0.83198 expressed sequence AI662270 AI662270  
1434069\_at 0.93860 SET domain containing 6 Setd6  
1434070\_at 0.88332 jagged 1 Jag1  
1434071\_a\_at 0.99494 pelota homolog (Drosophila) Pelo  
1434072\_at 0.89546 "Smith-Magenis syndrome chromosome region, candidate 7 homolog (human)"  
Smcr7  
1434073\_at 0.99667 G protein-coupled receptor associated sorting protein 2 Gprasp2  
1434074\_x\_at 0.98919 ADP-ribosylation factor 4 Arf4  
1434075\_at 0.88646 cDNA sequence BC030336 BC030336  
1434076\_at 1.05400 WD repeat domain 37 Wdr37  
1434077\_at 1.10374 WD repeat domain 37 Wdr37  
1434078\_at 1.00065 "DNA segment, Chr 7, Wayne State University 128, expressed" D7Wsu128e  
1434079\_s\_at 0.92080 minichromosome maintenance deficient 2 mitotin (S. cerevisiae) Mcm2  
1434080\_at 1.09933 AE binding protein 2 Aebp2  
1434081\_at 1.06421 "adaptor protein complex AP-1, gamma 1 subunit" Ap1g1  
1434082\_at 0.95261 --- ---

|              |         |                                                                           |               |
|--------------|---------|---------------------------------------------------------------------------|---------------|
| 1434083_a_at | 0.70232 | ELMO domain containing 1                                                  | Elmod1        |
| 1434084_at   | 0.91861 | RIKEN cDNA 5730601F06 gene                                                | 5730601F06Rik |
| 1434085_at   | 0.93616 | zinc finger protein 523                                                   | Zfp523        |
| 1434086_at   | 1.00045 | expressed sequence AI790205                                               | AI790205      |
| 1434087_at   | 1.07268 | "5,10-methylenetetrahydrofolate reductase"                                | Mthfr         |
| 1434088_at   | 0.94425 | zinc finger protein 496                                                   | Zfp496        |
| 1434089_at   | 0.57408 | synaptopodin                                                              | Synpo         |
| 1434090_at   | 0.98499 | RIKEN cDNA 4930429A22 gene                                                | 4930429A22Rik |
| 1434091_at   | 0.86083 | fatty acid amide hydrolase                                                | Faah          |
| 1434092_at   | 1.32710 | nitric oxide synthase 3 antisense                                         | Nos3as        |
| 1434093_at   | 0.83405 | "LysM, putative peptidoglycan-binding, domain containing 4"               | Lysmd4        |
| 1434094_at   | 0.82888 | RIKEN cDNA 6330530A05 gene                                                | 6330530A05Rik |
| 1434095_at   | 1.05095 | unc-5 homolog A (C. elegans)                                              | Unc5a         |
| 1434096_at   | 0.96726 | "solute carrier family 4 (anion exchanger), member 4"                     | Slc4a4        |
| 1434097_at   | 0.99157 | Transcribed locus                                                         | ---           |
| 1434098_at   | 0.94350 | "glycine receptor, alpha 2 subunit"                                       | Gla2          |
| 1434099_at   | 0.68403 | "Peroxisome proliferative activated receptor, gamma, coactivator 1 alpha" | Ppargc1a      |
| 1434100_x_at | 0.79849 | "Peroxisome proliferative activated receptor, gamma, coactivator 1 alpha" | Ppargc1a      |
| 1434101_at   | 1.18142 | nuclear factor I/B                                                        | Nfib          |
| 1434102_at   | 0.90842 | nuclear factor I/B                                                        | Nfib          |
| 1434103_at   | 0.91318 | expressed sequence AA408278                                               | AA408278      |
| 1434104_at   | 0.98770 | hypothetical protein 6030458H05                                           | 6030458H05    |
| 1434105_at   | 0.90936 | EPM2A (laforin) interacting protein 1                                     | Epm2aip1      |
| 1434106_at   | 0.88663 | EPM2A (laforin) interacting protein 1                                     | Epm2aip1      |
| 1434107_at   | 1.02383 | spermatogenesis associated 2                                              | Spata2        |
| 1434108_at   | 0.98132 | F-box protein 11                                                          | Fbxo11        |
| 1434109_at   | 0.97997 | SH3 domain binding glutamic acid-rich protein like 2                      | Sh3bgrl2      |
| 1434110_x_at | 0.94532 | major urinary protein 1                                                   | Mup1          |
| 1434111_at   | 0.76494 | latrophilin 2                                                             | Lphn2         |
| 1434112_at   | 0.81159 | latrophilin 2                                                             | Lphn2         |
| 1434113_a_at | 1.05752 | "REX4, RNA exonuclease 4 homolog (S. cerevisiae)"                         | Rexo4         |
| 1434114_at   | 1.21646 | "REX4, RNA exonuclease 4 homolog (S. cerevisiae)"                         | Rexo4         |
| 1434115_at   | 1.18266 | ---                                                                       | ---           |
| 1434116_at   | 0.95101 | chromobox homolog 2 (Drosophila Pc class)                                 | Cbx2          |
| 1434117_at   | 0.95122 | "transcription elongation factor B (SIII), polypeptide 3"                 | Tceb3         |
| 1434118_at   | 0.73415 | RIKEN cDNA 0610009K11 gene                                                | 0610009K11Rik |
| 1434119_at   | 0.91327 | "DNA segment, Chr 2, Wayne State University 81, expressed"                | D2Wsu81e      |
| 1434120_a_at | 1.05256 | methionine aminopeptidase 2                                               | Metap2        |
| 1434121_at   | 0.87699 | "leucine-rich repeat LGI family, member 4"                                | Lgi4          |
| 1434122_at   | 0.90663 | F-box protein 27                                                          | Fbxo27        |
| 1434123_at   | 0.87316 | fucosyltransferase 11                                                     | Fut11         |

1434124\_x\_at 1.02482 RIKEN cDNA 2400001E08 gene 2400001E08Rik  
1434125\_at 1.16621 "UTP15, U3 small nucleolar ribonucleoprotein, homolog (yeast)" Utp15  
1434126\_at 0.94120 RIKEN cDNA 4930402H24 gene 4930402H24Rik  
1434127\_a\_at 0.96252 "H3 histone, family 3A /// similar to H3 histone, family 3B /// similar to H3 histone, family 3B" H3f3a /// LOC544973 /// LOC625328 /// LOC669889 /// LOC670535 /// LOC675719  
1434128\_a\_at 0.82247 zinc finger protein 574 Zfp574  
1434129\_s\_at 1.18438 lipoma HMGIC fusion partner-like 2 Lhfpl2  
1434130\_at 1.31245 lipoma HMGIC fusion partner-like 2 Lhfpl2  
1434131\_at 0.91231 RUN and FYVE domain containing 1 Rufy1  
1434132\_at 1.09627 RIKEN cDNA E430025E21 gene E430025E21Rik  
1434133\_s\_at 0.83396 WD repeat domain 42A Wdr42a  
1434134\_at 0.97161 WD repeat domain 42A Wdr42a  
1434135\_at 1.12210 "UDP-GalNAc:betaGlcNAc beta 1,3-galactosaminyltransferase, polypeptide 2" B3galnt2  
1434136\_at 1.08488 RIKEN cDNA 6332401O19 gene 6332401O19Rik  
1434137\_x\_at 1.06748 RIKEN cDNA 1810010M01 gene 1810010M01Rik  
1434138\_at 0.83293 prune homolog (Drosophila) Prune  
1434139\_at 1.10479 "poly (ADP-ribose) polymerase family, member 11" Parp11  
1434140\_at 0.59012 mcf.2 transforming sequence-like Mcf2l  
1434141\_at 1.08387 "guanylate cyclase 1, soluble, alpha 3" Gucyl1a3  
1434142\_at 0.84660 "protein phosphatase 1D magnesium-dependent, delta isoform" Ppm1d  
1434143\_at 0.92494 cDNA sequence BC060631 BC060631  
1434144\_s\_at 1.42371 RIKEN cDNA 2410187C16 gene 2410187C16Rik  
1434145\_s\_at 0.84955 serine hydrolase-like Serhl  
1434146\_at 1.06255 "glutamate receptor, ionotropic, AMPA2 (alpha 2)" Gria2  
1434147\_at 0.99381 RIKEN cDNA 4631403P03 gene 4631403P03Rik  
1434148\_at 0.89359 transcription factor 4 Tcf4  
1434149\_at 0.83352 transcription factor 4 Tcf4  
1434150\_a\_at 0.86388 methyltransferase like 7A /// UbiE-YGHL1 fusion protein Mettl7a /// Ubie  
1434151\_at 0.95280 methyltransferase like 7A Mettl7a  
1434152\_at 0.94356 "RIKEN cDNA 2210421G13 gene /// hypothetical protein LOC193676 /// similar to apolipoprotein L, 3 (predicted)" 2210421G13Rik /// LOC193676 /// LOC666661  
1434153\_at 1.12869 src homology 2 domain-containing transforming protein B Shb  
1434154\_at 0.93894 potassium channel tetramerisation domain containing 13 Kctd13  
1434155\_a\_at 1.04097 RIKEN cDNA 2310061I04 gene 2310061I04Rik  
1434156\_at 0.90130 --- ---  
1434157\_at 0.89813 taxilin alpha Txlna  
1434158\_at 0.92476 "GDP-mannose 4, 6-dehydratase" Gmds  
1434159\_at 1.03201 serine/threonine kinase 4 Stk4  
1434160\_at 1.10219 zinc finger protein 592 Zfp592  
1434161\_at 1.01815 RIKEN cDNA 5830457H20 gene 5830457H20Rik

1434162\_at 0.99722 RIKEN cDNA 2700078E11 gene 2700078E11Rik  
1434163\_at 1.03926 expressed sequence AU024076 AU024076  
1434164\_s\_at 1.07503 expressed sequence AU024076 AU024076  
1434165\_at 0.96865 chloride intracellular channel 6 Clic6  
1434166\_at 1.04536 RIKEN cDNA 9330151L19 gene 9330151L19Rik  
1434167\_at 1.05842 "solute carrier family 35, member E4" Slc35e4  
1434168\_at 1.12421 progressive external ophthalmoplegia 1 (human) Peo1  
1434169\_at 0.91326 RIKEN cDNA 9030409G11 gene 9030409G11Rik  
1434170\_at 0.96463 WD repeat domain 40B Wdr40b  
1434171\_at 0.92414 RIKEN cDNA C330011K17 gene C330011K17Rik  
1434172\_at 0.96555 cannabinoid receptor 1 (brain) Cnr1  
1434173\_s\_at 1.05037 "DNA segment, Chr 19, Brigham & Women's Genetics 1357 expressed /// SWI/SNF related, matrix associated, actin dependent regulator of chromatin, subfamily a, member 2" D19Bwg1357e /// Smarca2  
1434174\_at 1.06224 "LysM, putative peptidoglycan-binding, domain containing 3" Lysmd3  
1434175\_s\_at 0.92783 RIKEN cDNA 2210010N04 gene 2210010N04Rik  
1434176\_x\_at 1.04782 "polymerase (DNA-directed), delta interacting protein 3" Poldip3  
1434177\_at 1.04949 endothelin converting enzyme 1 Ece1  
1434178\_at 0.89629 myeloid/lymphoid or mixed-lineage leukemia 3 Mll3  
1434179\_at 0.75585 myeloid/lymphoid or mixed-lineage leukemia 3 Mll3  
1434180\_at 0.97912 "pleckstrin homology domain containing, family C (with FERM domain) member 1" Plekhc1  
1434181\_at 0.95702 "pleckstrin homology domain containing, family C (with FERM domain) member 1" Plekhc1  
1434182\_at 1.01714 DEAD/H (Asp-Glu-Ala-Asp/His) box polypeptide 31 Ddx31  
1434183\_at 0.98061 similar to sterile alpha motif domain containing 1 /// similar to sterile alpha motif domain containing 1 /// similar to sterile alpha motif domain containing 1 LOC546078 /// LOC666704 /// LOC671345  
1434184\_s\_at 1.11730 RIKEN cDNA 9430080K19 gene 9430080K19Rik  
1434185\_at 1.06686 similar to acetyl-coenzyme A carboxylase alpha LOC672245  
1434186\_at 1.08091 G protein-coupled receptor 23 Gpr23  
1434187\_at 1.08858 --- ---  
1434188\_at 0.92472 "solute carrier family 16 (monocarboxylic acid transporters), member 12" Slc16a12  
1434189\_at 1.06968 stromal antigen 1 Stag1  
1434190\_at 1.07281 spermine synthase Sms  
1434191\_at 1.02894 RIKEN cDNA A530016O06 gene A530016O06Rik  
1434192\_at 1.12931 "zinc finger, ZZ-type with EF hand domain 1" Zzef1  
1434193\_at 1.02785 "zinc finger, MYM-type 6" Zmym6  
1434194\_at 0.66868 microtubule-associated protein 2 Mtap2  
1434195\_at 1.06741 "protease, serine, 35" Prss35  
1434196\_at 1.05253 "DnaJ (Hsp40) homolog, subfamily A, member 4" Dnaja4  
1434197\_at 0.95328 attractin Atrn

1434198\_at 1.05673 ATPase inhibitory factor 1 Atpif1  
1434199\_at 0.98444 "gene model 323, (NCBI)" Gm323  
1434200\_at 0.94892 cDNA sequence BC010981 BC010981  
1434201\_at 0.90407 Chordin-like 1 Chrdl1  
1434202\_a\_at 0.86403 cDNA sequence BC055107 BC055107  
1434203\_at 0.77536 cDNA sequence BC055107 BC055107  
1434204\_x\_at 1.03030 Serine hydroxymethyl transferase 2 (mitochondrial) Shmt2  
1434205\_at 0.83515 "protein phosphatase 2, regulatory subunit B (B56), gamma isoform" Ppp2r5c  
1434206\_s\_at 0.68477 "protein phosphatase 2, regulatory subunit B (B56), gamma isoform"  
Ppp2r5c  
1434207\_at 0.96585 RIKEN cDNA 2900057K09 gene 2900057K09Rik  
1434208\_at 0.85592 RIKEN cDNA 2900057K09 gene 2900057K09Rik  
1434209\_at 0.94136 protein arginine N-methyltransferase 6 Prmt6  
1434210\_s\_at 1.21435 leucine-rich repeats and immunoglobulin-like domains 1 Lrig1  
1434211\_at 0.95192 SH3 domain binding glutamic acid-rich protein like 2 Sh3bgrl2  
1434212\_at 0.98941 NADH dehydrogenase (ubiquinone) Fe-S protein 8 Ndufs8  
1434213\_x\_at 0.98691 NADH dehydrogenase (ubiquinone) Fe-S protein 8 Ndufs8  
1434214\_at 0.99758 RIKEN cDNA 0910001L09 gene 0910001L09Rik  
1434215\_at 1.03109 RIKEN cDNA B230308N11 gene B230308N11Rik  
1434216\_a\_at 0.92286 nudix (nucleoside diphosphate linked moiety X)-type motif 19 Nudt19  
1434217\_at 0.99062 RIKEN cDNA C330019G07 gene C330019G07Rik  
1434218\_at 0.90724 RIKEN cDNA C330019G07 gene C330019G07Rik  
1434219\_at 0.99964 stromal interaction molecule 2 Stim2  
1434220\_at 1.12306 nucleoporin 98 Nup98  
1434221\_at 0.86362 cDNA sequence BC030863 BC030863  
1434222\_at 0.94533 signal-induced proliferation-associated 1 like 1 Sipal11  
1434223\_at 0.90428 RIKEN cDNA 1810007P19 gene 1810007P19Rik  
1434224\_at 1.27394 transducin (beta)-like 2 Tbl2  
1434225\_at 1.00498 SWA-70 protein Swap70  
1434226\_at 0.88366 cytochrome b-561 domain containing 1 Cyb561d1  
1434227\_at 1.07738 keratinocyte differentiation associated protein Krtdap  
1434228\_at 0.98206 "protein phosphatase 2C, magnesium dependent, catalytic subunit" Ppm2c  
1434229\_a\_at 1.04765 "polymerase (DNA directed), beta" Polb  
1434230\_at 0.93532 "polymerase (DNA directed), beta /// RIKEN cDNA A430088C08 gene"  
Polb /// A430088C08Rik  
1434231\_x\_at 1.00026 ribosomal protein L35 Rpl35  
1434232\_a\_at 0.96222 RIKEN cDNA 2610030H06 gene 2610030H06Rik  
1434233\_at 1.06635 RIKEN cDNA 2610030H06 gene 2610030H06Rik  
1434234\_at 0.97411 zinc finger protein 341 Zfp341  
1434235\_at 1.06360 "solute carrier family 20, member 2" Slc20a2  
1434236\_at 0.94037 "zinc finger, DHHC domain containing 20" Zdhhc20  
1434237\_at 1.17490 uroplakin 3B Upk3b  
1434238\_at 1.01073 "TAF2 RNA polymerase II, TATA box binding protein (TBP)-associated

factor" Taf2

|              |         |                                                                  |               |
|--------------|---------|------------------------------------------------------------------|---------------|
| 1434239_at   | 1.28587 | expressed sequence AA408556                                      | AA408556      |
| 1434240_at   | 0.91581 | RIKEN cDNA 4632434I11 gene                                       | 4632434I11Rik |
| 1434241_at   | 1.01257 | WD repeat domain 67                                              | Wdr67         |
| 1434242_at   | 0.96281 | ubiquitin specific peptidase 37                                  | Usp37         |
| 1434243_s_at | 1.13441 | ---                                                              | ---           |
| 1434244_x_at | 0.99449 | HpaII tiny fragments locus 9c                                    | Htf9c         |
| 1434245_a_at | 0.93574 | "cytochrome b, ascorbate dependent 3"                            | Cybasec3      |
| 1434246_at   | 1.01288 | l(3)mbt-like 3 (Drosophila)                                      | L3mbtl3       |
| 1434247_at   | 0.91314 | lactate dehydrogenase A-like 6B                                  | Ldhal6b       |
| 1434248_at   | 0.84224 | "protein kinase C, eta"                                          | Prkch         |
| 1434249_s_at | 1.03480 | ---                                                              | ---           |
| 1434250_at   | 0.96018 | p21 (CDKN1A)-activated kinase 2                                  | Pak2          |
| 1434251_at   | 1.05660 | "CCR4-NOT transcription complex, subunit 1"                      | Cnot1         |
| 1434252_at   | 0.81162 | transmembrane and coiled coil domains 3                          | Tmcc3         |
| 1434253_s_at | 0.92022 | transmembrane and coiled coil domains 3                          | Tmcc3         |
| 1434254_at   | 0.97729 | "guanine nucleotide binding protein, alpha 11"                   | Gna11         |
| 1434255_at   | 0.91163 | phosphofurin acidic cluster sorting protein 2                    | Pacs2         |
| 1434256_s_at | 1.01085 | CDP-diacylglycerol synthase (phosphatidate cytidyltransferase) 2 | Cds2          |
| 1434257_s_at | 1.00772 | "phosphatidylinositol transfer protein, beta"                    | Pitpnb        |
| 1434258_s_at | 1.06472 | phosphatase and actin regulator 4                                | Phactr4       |
| 1434259_at   | 1.08197 | "similar to H2A histone family, member J"                        | LOC666811     |
| 1434260_at   | 0.79877 | FCH and double SH3 domains 2                                     | Fchsd2        |
| 1434261_at   | 0.73447 | signal-induced proliferation-associated 1 like 2                 | Sipa1l2       |
| 1434262_at   | 1.05787 | ---                                                              | ---           |
| 1434263_at   | 0.96028 | RIKEN cDNA F630110N24 gene                                       | F630110N24Rik |
| 1434264_at   | 1.06960 | "ankyrin 2, brain"                                               | Ank2          |
| 1434265_s_at | 0.94078 | "ankyrin 2, brain"                                               | Ank2          |
| 1434266_at   | 1.01971 | expressed sequence AI847670                                      | AI847670      |
| 1434267_at   | 0.92294 | NIMA (never in mitosis gene a)-related expressed kinase 1        | Nek1          |
| 1434268_at   | 1.04043 | "adenosine deaminase, RNA-specific"                              | Adar          |
| 1434269_at   | 0.73296 | expressed sequence AA536717                                      | AA536717      |
| 1434270_at   | 0.76940 | neuronal pentraxin receptor                                      | Nptxr         |
| 1434271_at   | 0.90939 | glucosidase beta 2                                               | Gba2          |
| 1434272_at   | 0.97845 | cytoplasmic polyadenylation element binding protein 2            | Cpeb2         |
| 1434273_at   | 1.06946 | RIKEN cDNA A830073O21 gene                                       | A830073O21Rik |
| 1434274_at   | 1.02372 | "pam, highwire, rpm 1"                                           | Phr1          |
| 1434275_at   | 0.85026 | Transcribed locus                                                | ---           |
| 1434276_x_at | 0.98821 | cDNA sequence BC004004                                           | BC004004      |
| 1434277_a_at | 0.78594 | Hypothetical protein 6430570G24                                  | 6430570G24    |
| 1434278_at   | 1.18770 | X-linked myotubular myopathy gene 1                              | Mtm1          |
| 1434279_at   | 1.13791 | X-linked myotubular myopathy gene 1                              | Mtm1          |
| 1434280_at   | 1.14632 | Widely-interspaced zinc finger motifs                            | Wiz           |

1434281\_at 0.85687 RIKEN cDNA 1500034J01 gene 1500034J01Rik  
1434282\_at 0.89112 inhibitor of Bruton agammaglobulinemia tyrosine kinase Ibtk  
1434283\_at 0.84203 AT rich interactive domain 5B (Mrf1 like) Arid5b  
1434284\_at 1.12197 "B double prime 1, subunit of RNA polymerase III transcription initiation factor IIIB" Bdp1  
1434285\_at 0.94818 FERM domain containing 4A Frmd4a  
1434286\_at 0.52547 trichorhinophalangeal syndrome I (human) Trps1  
1434287\_at 0.98558 "1-acylglycerol-3-phosphate O-acyltransferase 5 (lysophosphatidic acid acyltransferase, epsilon)" Apat5  
1434288\_at 0.97773 "basic, immunoglobulin-like variable motif containing" Bivm  
1434289\_at 0.96872 "NOL1/NOP2/Sun domain family, member 5" Nsun5  
1434290\_at 1.00888 glycosyltransferase-like domain containing 1 Gtdc1  
1434291\_a\_at 0.83184 small EDRK-rich factor 1 Serf1  
1434292\_at 0.98419 RIKEN cDNA E130013N09 gene E130013N09Rik  
1434293\_at 0.88327 HECT domain containing 3 Hectd3  
1434294\_at 0.82977 Transcribed locus ---  
1434295\_at 1.07269 RAS guanyl releasing protein 1 Rasgrp1  
1434296\_at 1.05369 cDNA sequence BC049349 BC049349  
1434297\_at 1.27815 RIKEN cDNA E130304F04 gene E130304F04Rik  
1434298\_at 0.92086 zinc finger homeobox 1b Zfhx1b  
1434299\_x\_at 1.03098 "RAB, member of RAS oncogene family-like 4" Rabl4  
1434300\_at 1.02121 RIKEN cDNA 2610101N10 gene 2610101N10Rik  
1434301\_at 0.79059 RIKEN cDNA D330050I23 gene D330050I23Rik  
1434302\_at 1.69048 Ras association (RalGDS/AF-6) and pleckstrin homology domains 1 Raph1  
1434303\_at 1.79657 Ras association (RalGDS/AF-6) and pleckstrin homology domains 1 Raph1  
1434304\_s\_at 1.02267 "DNA segment, Chr 10, ERATO Doi 438, expressed" D10Erd438e  
1434305\_at 0.97754 U2 small nuclear RNA auxiliary factor 1-like 4 U2af114  
1434306\_at 0.96104 RAB3A interacting protein Rab3ip  
1434307\_at 0.82108 transmembrane protein 64 Tmem64  
1434308\_at 1.01770 "solute carrier family 43, member 2" Slc43a2  
1434309\_at 0.80283 "farnesyltransferase, CAAX box, beta" Fntb  
1434310\_at 0.96586 "bone morphogenic protein receptor, type II (serine/threonine kinase)" Bmpr2  
1434311\_at 0.83627 "CCR4-NOT transcription complex, subunit 6-like" Cnot6l  
1434312\_at 0.97659 expressed sequence AI788669 AI788669  
1434313\_at 0.95718 RIKEN cDNA 6330407D12 gene 6330407D12Rik  
1434314\_s\_at 0.85659 RAB11 family interacting protein 5 (class I) Rab11fip5  
1434315\_at 0.75783 NIPA-like domain containing 3 Npal3  
1434316\_at 1.07690 carbohydrate (chondroitin) synthase 1 Chsy1  
1434317\_s\_at 1.09610 testis expressed gene 10 Tex10  
1434318\_a\_at 0.98123 transcription factor E3 Tcf3  
1434319\_at 1.03578 "malate dehydrogenase 1, NAD (soluble)" Mdh1  
1434320\_at 1.00538 "general transcription factor IIIC, polypeptide 4" Gtf3c4  
1434321\_at 0.88255 RIKEN cDNA 6620401K05 gene 6620401K05Rik

1434322\_at 1.49514 RIKEN cDNA A930021H16 gene A930021H16Rik  
1434323\_at 0.86444 "eukaryotic translation initiation factor 3, subunit 3 (gamma) /// similar to eukaryotic translation initiation factor 3, subunit 3 gamma, 40kDa" Eif3s3 /// LOC625074  
1434324\_x\_at 0.90543 "eukaryotic translation initiation factor 3, subunit 3 (gamma) /// similar to eukaryotic translation initiation factor 3, subunit 3 gamma, 40kDa" Eif3s3 /// LOC625074  
1434325\_x\_at 1.01317 "protein kinase, cAMP dependent regulatory, type I beta" Prkar1b  
1434326\_x\_at 0.71469 "coronin, actin binding protein, 2B" Coro2b  
1434327\_at 0.92306 --- ---  
1434328\_at 0.92100 ribosomal protein L15 Rpl15  
1434329\_s\_at 1.14372 adiponectin receptor 2 Adipor2  
1434330\_at 1.07253 leucine rich repeat containing 35 Lrrc35  
1434331\_at 1.03636 "eukaryotic translation initiation factor 2C, 1" Eif2c1  
1434332\_at 1.02501 "zinc finger, ZZ domain containing 3" Zzz3  
1434333\_a\_at 0.97355 protein kinase D2 Prkd2  
1434334\_at 0.86584 protein kinase D2 Prkd2  
1434335\_at 0.92827 expressed sequence AI317237 AI317237  
1434336\_s\_at 0.87822 REST corepressor 1 Rcor1  
1434337\_at 0.91604 Transcribed locus ---  
1434338\_at 1.04549 RIKEN cDNA 1110029E03 gene 1110029E03Rik  
1434339\_at 0.93575 formin binding protein 1-like Fnbp11  
1434340\_at 1.13343 --- ---  
1434341\_x\_at 1.01358 RIKEN cDNA 1110020P15 gene /// similar to ubiquinol-cytochrome c reductase complex 7.2kDa protein isoform a 1110020P15Rik /// LOC622178  
1434342\_at 0.89137 "S100 protein, beta polypeptide, neural" S100b  
1434343\_at 1.03055 RIKEN cDNA 5730403M16 gene 5730403M16Rik  
1434344\_at 0.93421 G patch domain and KOW motifs Gpkow  
1434345\_at 1.00277 transmembrane protein 12 Tmem12  
1434346\_at 0.87993 --- ---  
1434347\_s\_at 1.03820 --- ---  
1434348\_at 1.00275 fasciculation and elongation protein zeta 2 (zygin II) Fez2  
1434349\_at 0.95505 valyl-tRNA synthetase 2-like Vars21  
1434350\_at 0.87492 AXIN1 up-regulated 1 Axud1  
1434351\_at 1.04670 nucleoporin 214 Nup214  
1434352\_at 1.11310 RIKEN cDNA B630005N14 gene B630005N14Rik  
1434353\_at 0.87035 Scm-like with four mbt domains 2 Sfm2  
1434354\_at 0.97426 monoamine oxidase B Maob  
1434355\_at 0.99669 zinc finger protein 617 Zfp617  
1434356\_a\_at 1.05959 "proteasome (prosome, macropain) subunit, alpha type 5" Psma5  
1434357\_a\_at 1.12195 karyopherin (importin) beta 1 Kpnb1  
1434358\_x\_at 0.99778 ribosomal protein S21 Rps21  
1434359\_at 1.08044 RIKEN cDNA 6330500D04 gene 6330500D04Rik  
1434360\_s\_at 1.02376 "protein tyrosine phosphatase, receptor type, G /// similar to protein tyrosine phosphatase, receptor type, G" Ptpg /// LOC632664



1434361\_at 0.90556 SH3 and PX domain containing 3 Sh3px3  
1434362\_at 1.00799 expressed sequence AW550831 AW550831  
1434363\_x\_at 0.99378 PAX interacting (with transcription-activation domain) protein 1 Paxip1  
1434364\_at 0.98589 mitogen-activated protein kinase kinase kinase 14 Map3k14  
1434365\_a\_at 0.96988 cDNA sequence BC055324 BC055324  
1434366\_x\_at 0.99274 "complement component 1, q subcomponent, beta polypeptide" C1qb  
1434367\_s\_at 1.02856 nuclear transport factor 2 Nutf2  
1434368\_at 0.90855 RIKEN cDNA 1700008K24 gene 1700008K24Rik  
1434369\_a\_at 0.87574 "crystallin, alpha B" Cryab  
1434370\_s\_at 0.98085 Fas-associated factor 1 Faf1  
1434371\_x\_at 1.10992 ubiquitin specific peptidase 7 Usp7  
1434372\_at 1.74218 expressed sequence AW112010 AW112010  
1434373\_at 0.85141 RIKEN cDNA B930006L02 gene B930006L02Rik  
1434374\_at 0.90910 RIKEN cDNA B930006L02 gene B930006L02Rik  
1434375\_at 0.98802 RIKEN cDNA B930006L02 gene B930006L02Rik  
1434376\_at 1.13961 CD44 antigen Cd44  
1434377\_x\_at 1.06324 ribosomal protein S6 /// similar to 40S ribosomal protein S6 /// similar to 40S ribosomal protein S6 Rps6 /// LOC667739 /// LOC672620  
1434378\_a\_at 0.73815 Max dimerization protein 4 Mxd4  
1434379\_at 0.71383 Max dimerization protein 4 Mxd4  
1434380\_at 1.00425 guanylate binding protein 7 Gbp7  
1434381\_at 0.83784 cDNA sequence BC060631 BC060631  
1434382\_at 0.69565 serine incorporator 2 Serinc2  
1434383\_at 0.97196 "praja 2, RING-H2 motif containing" Pja2  
1434384\_at 0.82682 nuclear receptor interacting protein 1 Nrip1  
1434385\_at 0.85383 target of myb1-like 2 (chicken) Tom112  
1434386\_at 0.91628 "ATPase, Ca<sup>++</sup>-sequestering" Atp2c1  
1434387\_at 0.85657 integrin alpha FG-GAP repeat containing 3 Itfg3  
1434388\_at 1.01802 "MOB1, Mps One Binder kinase activator-like 2A (yeast)" Mobk12a  
1434389\_at 0.97089 expressed sequence AI449023 AI449023  
1434390\_at 0.95520 Heterogeneous nuclear ribonucleoprotein U Hnrpu  
1434391\_at 0.90163 Heterogeneous nuclear ribonucleoprotein U Hnrpu  
1434392\_at 1.02064 ubiquitin specific peptidase 34 Usp34  
1434393\_at 1.05497 ubiquitin specific peptidase 34 Usp34  
1434394\_at 0.90799 Bcl3 binding protein B3bp  
1434395\_at 0.89796 "mannosidase, alpha, class 1A, member 2" Man1a2  
1434396\_a\_at 0.95064 "myosin, light polypeptide 6, alkali, smooth muscle and non-muscle /// similar to myosin, light polypeptide 6, alkali, smooth muscle and non-muscle /// similar to Myosin light polypeptide 6 (Myosin light chain alkali 3) (Myosin light chain 3) (MLC-3) (LC17) /// similar to Myosin light polypeptide 6 (Myosin light chain alkali 3) (Myosin light chain 3) (MLC-3) (LC17)" Myl6 /// LOC433297 /// LOC667952 /// LOC671953  
1434397\_at 1.00687 "zinc finger, DHHC domain containing 17" Zdhhc17  
1434398\_at 1.05885 NF-kappaB repressing factor Nkrf

1434399\_at 0.94489 UDP-N-acetyl-alpha-D-galactosamine:polypeptide N-acetylgalactosaminyltransferase 6 Galnt6  
1434400\_at 0.98091 TGFβ-induced factor 2 Tgif2  
1434401\_at 0.99257 "zinc finger, CCHC domain containing 2" Zcchc2  
1434402\_at 0.94561 sterile alpha motif domain containing 8 Samd8  
1434403\_at 1.16913 "sprouty-related, EVH1 domain containing 2" Spred2  
1434404\_at 0.93974 RIKEN cDNA C030011O14 gene C030011O14Rik  
1434405\_at 1.13336 RIKEN cDNA A730024A03 gene A730024A03Rik  
1434406\_at 1.00630 SLIT-ROBO Rho GTPase activating protein 2 Srgap2  
1434407\_at 0.93036 SLIT-ROBO Rho GTPase activating protein 2 Srgap2  
1434408\_at 0.86268 "Machado-Joseph disease (spinocerebellar ataxia 3, olivopontocerebellar ataxia 3, autosomal dominant, ataxin 3) homolog (human)" Mjd  
1434409\_at 0.79129 "armadillo repeat containing, X-linked 6" Armcx6  
1434410\_at 0.90437 cDNA sequence BC043118 BC043118  
1434411\_at 0.76548 --- ---  
1434412\_x\_at 0.99756 STIP1 homology and U-Box containing protein 1 Stub1  
1434413\_at 0.67428 --- ---  
1434414\_at 1.09829 FAD-dependent oxidoreductase domain containing 2 Foxred2  
1434415\_at 0.84945 dact 3 Dact3  
1434416\_a\_at 1.04592 Small optic lobes homolog (Drosophila) Solh  
1434417\_at 0.91641 --- ---  
1434418\_at 1.08440 longevity assurance homolog 6 (S. cerevisiae) Lass6  
1434419\_s\_at 1.07629 TAR DNA binding protein Tardbp  
1434420\_x\_at 1.05218 translocase of outer mitochondrial membrane 22 homolog (yeast) Tomm22  
1434421\_at 0.96303 immunoglobulin superfamily containing leucine-rich repeat 2 Islr2  
1434422\_at 1.06690 --- ---  
1434423\_at 0.97049 --- ---  
1434424\_at 1.03584 RIKEN cDNA 9630055N22 gene /// similar to Feline leukemia virus subgroup C receptor-related protein 1 (Feline leukemia virus subgroup C receptor) (hFLVCR) 9630055N22Rik /// LOC670389  
1434425\_at 1.03874 trichohyalin Tchh  
1434426\_at 1.19003 RIKEN cDNA B130055D15 gene B130055D15Rik  
1434427\_a\_at 0.86281 ring finger protein 157 Rnf157  
1434428\_at 0.69557 RIKEN cDNA D330028D13 gene D330028D13Rik  
1434429\_at 1.01148 synaptotagmin XVI Syt16  
1434430\_s\_at 0.90668 adenosine A2b receptor Adora2b  
1434431\_x\_at 1.03944 adenosine A2b receptor Adora2b  
1434432\_at 0.83133 ring finger and FYVE like domain containing protein Rffl  
1434433\_x\_at 1.07797 WD repeat domain 61 Wdr61  
1434434\_s\_at 0.99923 transcription elongation regulator 1 (CA150) Tcerg1  
1434435\_s\_at 0.90860 "cytochrome c oxidase, subunit XVII assembly protein homolog (yeast)" Cox17  
1434436\_at 0.95721 microrchidia 4 Morc4

1434437\_x\_at 0.91050 ribonucleotide reductase M2 Rrm2  
1434438\_at 1.00341 "SAM domain and HD domain, 1" Samhd1  
1434439\_at 1.04209 glycogen synthase kinase 3 beta Gsk3b  
1434440\_at 0.49752 "guanine nucleotide binding protein, alpha inhibiting 1" Gnai1  
1434441\_at 1.03161 RIKEN cDNA 1110018J18 gene 1110018J18Rik  
1434442\_at 0.79994 "DNA segment, Chr 5, ERATO Doi 593, expressed" D5Ertd593e  
1434443\_at 0.90611 --- ---  
1434444\_s\_at 0.91822 --- ---  
1434445\_at 0.95123 "DNA segment, Chr 15, Wayne State University 169, expressed" D15Wsu169e  
1434446\_at 0.91595 RIKEN cDNA D630014A15 gene D630014A15Rik  
1434447\_at 1.05006 expressed sequence AI838057 AI838057  
1434448\_at 0.94592 taxilin alpha Txlna  
1434449\_at 1.01849 aquaporin 4 Aqp4  
1434450\_s\_at 1.14287 "adrenergic receptor kinase, beta 2" Adrbk2  
1434451\_at 0.65630 "NOD-derived CD11c +ve dendritic cells cDNA, RIKEN full-length enriched library, clone:F630119A15 product:hypothetical protein, full insert sequence" ---  
1434452\_x\_at 1.06642 eukaryotic translation initiation factor 2a Eif2a  
1434453\_at 1.04753 polymerase (RNA) III (DNA directed) polypeptide A Polr3a  
1434454\_at 0.84013 "DNA segment, Chr 16, Wayne State University 65, expressed" D16Wsu65e  
1434455\_at 0.83636 : F-box protein 44 Fbxo44  
1434456\_at 0.80351 "gene model 440, (NCBI)" Gm440  
1434457\_at 1.01266 nuclear antigen Sp100 Sp100  
1434458\_at 0.85547 Follistatin Fst  
1434459\_at 0.92776 cDNA sequence BC057627 BC057627  
1434460\_at 0.92177 Bardet-Biedl syndrome 4 homolog (human) Bbs4  
1434461\_at 0.95476 zinc finger protein 715 Zfp715  
1434462\_at 0.96944 cDNA sequence BC088983 BC088983  
1434463\_at 0.84491 "beaded filament structural protein 2, phakinin" Bfsp2  
1434464\_at 1.07016 aquaporin 12 Aqp12  
1434465\_x\_at 1.00401 very low density lipoprotein receptor Vldlr  
1434466\_at 0.97966 "ataxia, cerebellar, Cayman type homolog (human)" Atcay  
1434467\_at 1.07966 "ataxia, cerebellar, Cayman type homolog (human)" Atcay  
1434468\_at 1.08203 OTU domain containing 4 Otud4  
1434469\_at 1.08376 OTU domain containing 4 Otud4  
1434470\_at 0.86434 synaptotagmin XIII Syt13  
1434471\_at 1.02330 cDNA sequence BC003331 BC003331  
1434472\_at 1.04305 dual specificity phosphatase 3 (vaccinia virus phosphatase VH1-related) Dusp3  
1434473\_at 0.98110 "solute carrier family 16 (monocarboxylic acid transporters), member 5" Slc16a5  
1434474\_at 0.85901 "ATP-binding cassette, sub-family A (ABC1), member 5" Abca5  
1434475\_at 0.92067 peptidyl-prolyl isomerase G (cyclophilin G) Ppig  
1434476\_at 0.92680 CREB regulated transcription coactivator 1 Crtc1  
1434477\_at 0.85461 headcase homolog (Drosophila) Heca  
1434478\_at 0.91839 headcase homolog (Drosophila) Heca

1434479\_at 0.86240 "Procollagen, type V, alpha 1" Col5a1  
1434480\_at 0.99810 RIKEN cDNA 4930402E16 gene 4930402E16Rik  
1434481\_at 0.89352 RIKEN cDNA 4121402D02 gene 4121402D02Rik  
1434482\_at 1.02500 "DNA segment, Chr 4, ERATO Doi 22, expressed" D4Ertd22e  
1434483\_at 1.00839 ubiquitin specific peptidase 12 Usp12  
1434484\_at 1.02550 RIKEN cDNA 1100001G20 gene 1100001G20Rik  
1434485\_a\_at 0.98401 UDP-glucose pyrophosphorylase 2 Ugp2  
1434486\_x\_at 1.01942 UDP-glucose pyrophosphorylase 2 Ugp2  
1434487\_at 0.86349 myocyte enhancer factor 2D Mef2d  
1434488\_at 1.10068 ADP-ribosylation factor related protein 1 Arfrp1  
1434489\_at 0.93033 "engulfment and cell motility 3, ced-12 homolog (C. elegans)" Elmo3  
1434490\_at 0.94310 "scavenger receptor class F, member 1" Scarf1  
1434491\_a\_at 0.99646 "cytochrome c oxidase, subunit VIc" Cox6c  
1434492\_at 0.97465 RIKEN cDNA A130022J15 gene A130022J15Rik  
1434493\_at 1.14126 RIKEN cDNA 1810022K09 gene 1810022K09Rik  
1434494\_at 0.90602 zygote arrest 1 Zar1  
1434495\_at 0.83587 zinc finger protein 278 Zfp278  
1434496\_at 1.12690 polo-like kinase 3 (Drosophila) Plk3  
1434497\_at 1.05724 --- ---  
1434498\_at 0.98110 "gene model 1673, (NCBI)" Gm1673  
1434499\_a\_at 1.16649 lactate dehydrogenase B Ldhb  
1434500\_at 0.92099 tweety homolog 2 (Drosophila) Ttyh2  
1434501\_at 0.95247 --- ---  
1434502\_x\_at 0.95384 "solute carrier family 4 (anion exchanger), member 1" Slc4a1  
1434503\_s\_at 0.93249 lysosomal membrane glycoprotein 2 Lamp2  
1434504\_at 0.90345 "zinc finger, FYVE domain containing 28" Zfyve28  
1434505\_a\_at 0.95006 --- ---  
1434506\_at 0.89057 AT rich interactive domain 2 (Arid-rfx like) Arid2  
1434507\_at 0.85955 aminopeptidase-like 1 Npepl1  
1434508\_at 1.05810 ubiquitin-conjugating enzyme E2Q (putative) Ube2q  
1434509\_at 0.97562 Rap guanine nucleotide exchange factor (GEF) 6 Rapgef6  
1434510\_at 0.92174 3'-phosphoadenosine 5'-phosphosulfate synthase 2 Paps2  
1434511\_at 0.93584 phosphorylase kinase beta Phkb  
1434512\_x\_at 0.95611 "splicing factor, arginine/serine-rich 3 (SRp20) /// similar to Splicing factor, arginine/serine-rich 3 (Pre-mRNA splicing factor SRP20) (X16 protein)" Sfrs3 /// LOC632248  
1434513\_at 1.08365 ATPase type 13A3 Atp13a3  
1434514\_at 1.01318 RNA binding motif protein 15 Rbm15  
1434515\_at 0.81764 nuclear receptor coactivator 1 Ncoal  
1434516\_at 0.99018 phosphoserine-tRNA kinase Pstk  
1434517\_at 1.15026 WD repeat and FYVE domain containing 2 Wdfy2  
1434518\_at 1.03874 phosphorylase kinase alpha 2 Phka2  
1434519\_at 0.89554 dimethylarginine dimethylaminohydrolase 1 Ddah1  
1434520\_at 1.40818 "sterol-C5-desaturase (fungal ERG3, delta-5-desaturase) homolog (S.

cerevisae)" Sc5d  
 1434521\_at 1.03395 regulatory factor X domain containing 2 homolog (human) Rfxdc2  
 1434522\_at 0.90441 WD repeat domain 4 Wdr4  
 1434523\_x\_at 1.01480 "eukaryotic translation initiation factor 3, subunit 6" Eif3s6  
 1434524\_at 1.09742 "eukaryotic translation initiation factor 2B, subunit 3" Eif2b3  
 1434525\_at 0.99944 protein kinase N3 Pkn3  
 1434526\_at 0.99570 abhydrolase domain containing 7 Abhd7  
 1434527\_at 0.97301 "NACHT, leucine rich repeat and PYD containing 4B" Nalp4b  
 1434528\_at 0.95339 alanine and arginine rich domain containing protein Aard  
 1434529\_x\_at 0.93493 checkpoint with forkhead and ring finger domains Chfr  
 1434530\_at 1.10895 odd Oz/ten-m homolog 4 (Drosophila) Odz4  
 1434531\_at 1.04717 "mannoside acetylglucosaminyltransferase 5, isoenzyme B" Mgat5b  
 1434532\_at 0.82632 cDNA sequence BC035295 BC035295  
 1434533\_x\_at 1.01284 CEA-related cell adhesion molecule 11 Ceacam11  
 1434534\_at 1.01454 --- ---  
 1434535\_at 1.09330 keratin 222 Krt222  
 1434536\_at 0.94630 G protein-coupled receptor 75 Gpr75  
 1434537\_at 0.92213 "solute carrier organic anion transporter family, member 3a1" Slco3a1  
 1434538\_x\_at 1.03349 "eukaryotic translation initiation factor 2B, subunit 2 beta" Eif2b2  
 1434539\_at 0.97060 "leucine rich repeat protein 3, neuronal" Lrrn3  
 1434540\_a\_at 1.09912 "clathrin, light polypeptide (Lca)" Clta  
 1434541\_x\_at 1.01440 --- ---  
 1434542\_at 1.03129 glutamic pyruvate transaminase (alanine aminotransferase) 2 Gpt2  
 1434543\_a\_at 0.98832 bolA-like 2 (E. coli) Bola2  
 1434544\_at 1.00954 bolA-like 2 (E. coli) Bola2  
 1434545\_x\_at 0.96150 bolA-like 2 (E. coli) Bola2  
 1434546\_at 0.97149 "Smg-5 homolog, nonsense mediated mRNA decay factor (C. elegans)"  
 Smg5  
 1434547\_at 0.96708 carboxypeptidase D Cpd  
 1434548\_at 0.91897 serine incorporator 3 Serinc3  
 1434549\_at 0.93660 --- ---  
 1434550\_at 0.96049 RIKEN cDNA 3830406C13 gene 3830406C13Rik  
 1434551\_at 0.89362 heterogeneous nuclear ribonucleoprotein U-like 2 Hnrpul2  
 1434552\_at 0.96283 WD repeat domain 77 Wdr77  
 1434553\_at 0.98070 transmembrane protein 56 Tmem56  
 1434554\_at 0.89129 tripartite motif protein 37 Trim37  
 1434555\_at 0.90175 "acidic (leucine-rich) nuclear phosphoprotein 32 family, member A" Anp32a  
 1434556\_at 1.34811 "Bone marrow macrophage cDNA, RIKEN full-length enriched library, clone:  
 I830003K21 product:unclassifiable, full insert sequence" ---  
 1434557\_at 0.79329 huntingtin interacting protein 1 Hip1  
 1434558\_at 1.06162 WD repeat domain 47 Wdr47  
 1434559\_at 1.06203 syntaxin 3 Stx3  
 1434560\_at 0.98200 WD and tetratricopeptide repeats 1 Wdtd1

1434561\_at 0.92462 additional sex combs like 1 (Drosophila) Asxl1  
1434562\_at 0.97032 microfibrillar-associated protein 3 Mfap3  
1434563\_at 0.94191 ribosomal protein S6 kinase polypeptide 1 Rps6kc1  
1434564\_at 1.19087 E2F transcription factor 3 E2f3  
1434565\_at 0.84983 cell growth regulator with ring finger domain 1 Cgrrf1  
1434566\_a\_at 0.77288 RIKEN cDNA 4732496O08 gene 4732496O08Rik  
1434567\_at 0.87174 RIKEN cDNA 4732496O08 gene 4732496O08Rik  
1434568\_at 1.07031 Transcribed locus ---  
1434569\_at 0.93016 expressed sequence AA474455 AA474455  
1434570\_at 1.06177 cDNA sequence AK122525 AK122525  
1434571\_at 0.91190 vacuolar protein sorting 13B (yeast) /// similar to vacuolar protein sorting 13B isoform 4 /// region containing RIKEN cDNA C330002D13 gene; RIKEN cDNA 2310042E16 gene; vacuolar protein sorting 13B (yeast) Vps13b /// LOC666173 /// LOC669978  
1434572\_at 1.02762 histone deacetylase 9 Hdac9  
1434573\_at 0.96083 TRAF3 interacting protein 3 Traf3ip3  
1434574\_at 1.04186 RIKEN cDNA 9430008C03 gene 9430008C03Rik  
1434575\_at 0.94985 erythrocyte protein band 4.1-like 1 Epb4.111  
1434576\_at 0.94201 testis specific gene A14 Tsga14  
1434577\_at 1.03758 cDNA sequence BC052040 BC052040  
1434578\_x\_at 1.06896 "RAN, member RAS oncogene family /// similar to RAN, member RAS oncogene family /// similar to RAN, member RAS oncogene family" Ran /// LOC625094 /// LOC671251  
1434579\_x\_at 0.94543 NADH dehydrogenase (ubiquinone) Fe-S protein 8 Ndufs8  
1434580\_at 0.97117 ectonucleotide pyrophosphatase/phosphodiesterase 4 Enpp4  
1434581\_at 0.67813 --- ---  
1434582\_at 0.82823 "DNA segment, Chr 14, ERATO Doi 171, expressed" D14Ertd171e  
1434583\_at 0.98197 transmembrane protein 26 Tmem26  
1434584\_a\_at 0.99293 preferentially expressed antigen in melanoma like 5 /// Unknown (protein for IMAGE:30033377) /// similar to preferentially expressed antigen in melanoma like 5 Pramel5 /// LOC384077 /// LOC674184  
1434585\_at 1.10346 RIKEN cDNA 2210038L17 gene 2210038L17Rik  
1434586\_a\_at 0.88105 phosphatidylserine synthase 2 Ptdss2  
1434587\_x\_at 0.97581 phosphatidylserine synthase 2 Ptdss2  
1434588\_x\_at 0.97655 tubulin cofactor a /// similar to Tubulin-specific chaperone A (Tubulin-folding cofactor A) (CFA) (TCP1-chaperonin cofactor A) Tbca /// LOC620313  
1434589\_x\_at 0.91882 surfeit gene 4 Surf4  
1434590\_at 0.82826 RIKEN cDNA B230209C24 gene B230209C24Rik  
1434591\_at 0.81402 RIKEN cDNA 4732460K03 gene 4732460K03Rik  
1434592\_at 0.89378 "solute carrier family 16 (monocarboxylic acid transporters), member 10" Slc16a10  
1434593\_at 0.96413 eukaryotic translation initiation factor 5A2 Eif5a2  
1434594\_at 0.97423 "dynein, axonemal, heavy chain 1" Dnahc1  
1434595\_at 0.99470 tripartite motif protein 9 Trim9  
1434596\_at 0.95224 "PREDICTED: Mus musculus hypothetical protein LOC625568 (LOC625568),

mRNA" ---

1434597\_at 1.01075 "La ribonucleoprotein domain family, member 5" Larp5  
 1434598\_at 1.03318 "La ribonucleoprotein domain family, member 5" Larp5  
 1434599\_a\_at 0.86049 tight junction protein 2 Tjp2  
 1434600\_at 0.89221 tight junction protein 2 Tjp2  
 1434601\_at 0.93539 adhesion molecule with Ig like domain 2 Amigo2  
 1434602\_at 0.96175 thyroid hormone receptor associated protein 2 Thrap2  
 1434603\_at 0.94619 thyroid hormone receptor associated protein 2 Thrap2  
 1434604\_at 1.09908 eukaryotic translation initiation factor 5B Eif5b  
 1434605\_at 1.08487 eukaryotic translation initiation factor 5B Eif5b  
 1434606\_at 0.83898 v-erb-b2 erythroblastic leukemia viral oncogene homolog 3 (avian) Erbb3  
 1434607\_at 0.98512 DEAD (Asp-Glu-Ala-Asp) box polypeptide 52 Ddx52  
 1434608\_at 1.05891 --- ---  
 1434609\_at 1.08721 RIKEN cDNA B930007L02 gene B930007L02Rik  
 1434610\_at 1.06100 plectin 1 Plec1  
 1434611\_at 1.01263 ring finger protein 123 Rnf123  
 1434612\_s\_at 1.01983 "sno, strawberry notch homolog 1 (Drosophila)" Sbnol  
 1434613\_at 0.98514 RIKEN cDNA 1810013L24 gene 1810013L24Rik  
 1434614\_at 1.00168 --- ---  
 1434615\_x\_at 0.85793 --- ---  
 1434616\_at 1.07521 RIKEN cDNA 1810073N04 gene 1810073N04Rik  
 1434617\_x\_at 0.91022 RIKEN cDNA 1810073N04 gene 1810073N04Rik  
 1434618\_at 1.04074 --- ---  
 1434619\_at 0.93356 --- ---  
 1434620\_s\_at 0.91155 RIKEN cDNA 2610024E20 gene 2610024E20Rik  
 1434621\_at 0.86583 cDNA sequence BC054438 BC054438  
 1434622\_at 0.91637 IQ motif containing E Iqce  
 1434623\_at 0.97996 ubiquitin A-52 residue ribosomal protein fusion product 1 /// similar to ubiquitin  
 A-52 residue ribosomal protein fusion product 1 /// similar to ubiquitin A-52 residue ribosomal protein  
 fusion product 1 /// similar to ubiquitin A-52 residue ribosomal protein fusion product 1 /// similar to  
 ubiquitin A-52 residue ribosomal protein fusion product 1 /// similar to ubiquitin A-52 residue ribosomal  
 protein fusion product 1 /// similar to ubiquitin A-52 residue ribosomal protein fusion product 1 ///  
 similar to ubiquitin A-52 residue ribosomal protein fusion product 1 Uba52 /// LOC383341 ///  
 LOC665823 /// LOC666586 /// LOC669193 /// LOC669699 /// LOC676355 /// LOC676687  
 1434624\_x\_at 1.04957 ribosomal protein S9 Rps9  
 1434625\_at 0.84256 RIKEN cDNA 4930432O21 gene 4930432O21Rik  
 1434626\_at 0.96778 RNA pseudouridylate synthase domain containing 3 Rpusd3  
 1434627\_at 1.56810 Nuclear respiratory factor 1 Nrf1  
 1434628\_a\_at 1.19667 "rhophilin, Rho GTPase binding protein 2" Rhpn2  
 1434629\_at 1.21433 zinc finger and BTB domain containing 26 Zbtb26  
 1434630\_at 1.05394 ankyrin repeat domain 28 Ankrd28  
 1434631\_at 0.90309 "DNA segment, Chr 3, ERATO Doi 751, expressed" D3Ert751e  
 1434632\_at 1.00716 Transcribed locus ---

1434633\_at 0.83990 CREB binding protein Crebbp  
1434634\_at 0.89394 "gene model 166, (NCBI)" Gm166  
1434635\_at 0.87228 rabphilin 3A Rph3a  
1434636\_at 0.97248 homeodomain leucine zipper-encoding gene Homez  
1434637\_x\_at 1.06869 "transcriptional regulator, SIN3B (yeast)" Sin3b  
1434638\_at 1.01513 "Adult male corpora quadrigemina cDNA, RIKEN full-length enriched library, clone:B230036G05 product:unclassifiable, full insert sequence" ---  
1434639\_at 0.91100 kelch repeat and BTB (POZ) domain containing 9 Kbtbd9  
1434640\_at 1.08415 neurensin 2 Nrsn2  
1434641\_x\_at 1.00988 seizure related 6 homolog like 2 Sez6l2  
1434642\_at 0.94897 dehydrogenase/reductase (SDR family) member 8 Dhrs8  
1434643\_at 1.02889 transducin (beta)-like 1 X-linked Tbl1x  
1434644\_at 0.94359 transducin (beta)-like 1 X-linked Tbl1x  
1434645\_at 1.00230 RIKEN cDNA C530008M17 gene C530008M17Rik  
1434646\_s\_at 1.08245 Sin3-associated polypeptide 18 Sap18  
1434647\_at 0.97451 expressed sequence AU040377 AU040377  
1434648\_a\_at 0.96834 cerebral cavernous malformation 2 homolog (human) Ccm2  
1434649\_at 0.91332 cerebral cavernous malformation 2 homolog (human) Ccm2  
1434650\_at 0.88097 pogo transposable element with ZNF domain Pogz  
1434651\_a\_at 0.87219 claudin 3 Cldn3  
1434652\_at 0.99580 Cdc42 binding protein kinase beta Cdc42bpb  
1434653\_at 0.82596 PTK2 protein tyrosine kinase 2 beta Ptk2b  
1434654\_at 1.01628 component of oligomeric golgi complex 3 Cog3  
1434655\_at 1.12522 forkhead box K1 Foxk1  
1434656\_at 1.02673 RIKEN cDNA B230339M05 gene B230339M05Rik  
1434657\_at 1.14104 glutaminase Glu  
1434658\_at 0.97893 RIKEN cDNA 3110056O03 gene 3110056O03Rik  
1434659\_at 0.95941 RIKEN cDNA 5830411G16 gene 5830411G16Rik  
1434660\_at 1.29684 "alkB, alkylation repair homolog 1 (E. coli)" Alkbh1  
1434661\_at 0.96301 synaptogyrin 1 Syng1  
1434662\_at 0.90268 autophagy-related 4A (yeast) /// similar to Cysteine protease ATG4A (Autophagy-related protein 4 homolog A) (Autophagin-2) (Autophagy-related cysteine endopeptidase 2) (AUT-like 2 cysteine endopeptidase) /// similar to Cysteine protease ATG4A (Autophagy-related protein 4 homolog A) (Autophagin-2) (Autophagy-related cysteine endopeptidase 2) (AUT-like 2 cysteine endopeptidase) Atg4a /// LOC666476 /// LOC675173  
1434663\_at 0.91415 RIKEN cDNA 2410129H14 gene 2410129H14Rik  
1434664\_at 0.95825 RIKEN cDNA 2410129H14 gene 2410129H14Rik  
1434665\_at 1.07626 aspartylglucosaminidase Aga  
1434666\_at 1.08166 polycomb group ring finger 5 Pcgf5  
1434667\_at 0.77848 "procollagen, type VIII, alpha 2" Col8a2  
1434668\_at 1.03453 nuclear casein kinase and cyclin-dependent kinase substrate 1 Nucks1  
1434669\_at 0.94997 Ral GEF with PH domain and SH3 binding motif 1 Ralgps1  
1434670\_at 0.94626 kinesin family member 5A Kif5a



1434671\_at 0.91019 RIKEN cDNA B230337E12 gene B230337E12Rik  
1434672\_at 1.05455 G protein-coupled receptor 22 Gpr22  
1434673\_at 1.07444 G protein-coupled receptor 22 Gpr22  
1434674\_at 0.82826 lysosomal trafficking regulator Lyst  
1434675\_at 1.01337 RIKEN cDNA 1700065O13 gene 1700065O13Rik  
1434676\_at 0.94864 myotubularin related protein 9 Mtmr9  
1434677\_at 0.90178 Hermansky-Pudlak syndrome 5 homolog (human) Hps5  
1434678\_at 1.03124 muscleblind-like 3 (Drosophila) Mbnl3  
1434679\_at 0.98926 chondroitin sulfate proteoglycan 3 Cspg3  
1434680\_at 0.99802 "pleckstrin homology domain containing, family G (with RhoGef domain)  
member 3" Plekhg3  
1434681\_at 1.13701 RIKEN cDNA 4932441K18 gene 4932441K18Rik  
1434682\_at 1.13091 RIKEN cDNA 6430601A21 gene 6430601A21Rik  
1434683\_at 0.74528 Cut-like 1 (Drosophila) Cutl1  
1434684\_at 0.96227 Ras and Rab interactor 3 Rin3  
1434685\_at 0.90711 "DNA segment, Chr 3, Brigham & Women's Genetics 0562 expressed"  
D3Bwg0562e  
1434686\_at 1.00372 --- ---  
1434687\_at 0.88829 hypothetical protein C730026J16 C730026J16  
1434688\_x\_at 0.88648 developmentally regulated GTP binding protein 1 Drg1  
1434689\_at 0.86162 zinc finger protein 637 Zfp637  
1434690\_at 0.89458 lysocardiolipin acyltransferase Lypcat  
1434691\_at 0.93284 "splicing factor, arginine/serine-rich 2, interacting protein" Sfrs2ip  
1434692\_at 1.11507 RIKEN cDNA 1110034B05 gene 1110034B05Rik  
1434693\_at 1.06478 "Adult male medulla oblongata cDNA, RIKEN full-length enriched library,  
clone:6330441D15 product:hypothetical protein, full insert sequence" ---  
1434694\_at 0.98541 leucine rich repeat containing 8A Lrrc8a  
1434695\_at 0.98705 denticleless homolog (Drosophila) Dtl  
1434696\_at 1.00391 intraflagellar transport 52 homolog (Chlamydomonas) Ift52  
1434697\_at 0.87830 RIKEN cDNA 1110001P04 gene 1110001P04Rik  
1434698\_at 0.95389 RIKEN cDNA 9130229H14 gene 9130229H14Rik  
1434699\_at 1.03245 RIKEN cDNA 6030408C04 gene 6030408C04Rik  
1434700\_at 1.07414 RIKEN cDNA 6030408C04 gene 6030408C04Rik  
1434701\_at 1.12584 expressed sequence AW215868 AW215868  
1434702\_at 1.05347 RIKEN cDNA 2600009E05 gene 2600009E05Rik  
1434703\_at 1.01169 exostoses (multiple)-like 3 Extl3  
1434704\_at 0.93658 myeloid/lymphoid or mixed-lineage leukemia 5 Mll5  
1434705\_at 0.96204 "C-terminal binding protein 2 /// zinc finger, RAN-binding domain containing  
1" Ctbp2 /// Zranb1  
1434706\_at 0.99013 valosin containing protein (p97)/p47 complex interacting protein 1 Vcpip1  
1434707\_at 1.00336 SET binding factor 1 Sbf1  
1434708\_at 1.10521 von Hippel-Lindau syndrome homolog Vhlh  
1434709\_at 1.02762 RIKEN cDNA C130076O07 gene C130076O07Rik

1434710\_at 1.05268 DEAH (Asp-Glu-Ala-His) box polypeptide 29 Dhx29  
1434711\_at 0.96381 cDNA sequence BC030867 BC030867  
1434712\_at 0.97798 "Smith-Magenis syndrome chromosome region, candidate 7-like (human)"  
Smcr7l  
1434713\_at 0.96158 "Smith-Magenis syndrome chromosome region, candidate 7-like (human)"  
Smcr7l  
1434714\_at 1.04488 ERO1-like beta (*S. cerevisiae*) Ero1lb  
1434715\_at 1.04234 RIKEN cDNA 1600014C10 gene 1600014C10Rik  
1434716\_at 1.03959 hepatitis A virus cellular receptor 1 Havcr1  
1434717\_at 0.97996 cullin 3 Cul3  
1434718\_at 1.01638 cullin 3 Cul3  
1434719\_at 1.01762 alpha-2-macroglobulin /// hypothetical protein LOC677369 A2m ///  
LOC677369  
1434720\_at 1.00913 RIKEN cDNA 9530033F24 gene 9530033F24Rik  
1434721\_at 1.01016 "DNA segment, Chr 5, ERATO Doi 585, expressed" D5Ert585e  
1434722\_at 0.88508 adenosine monophosphate deaminase 1 (isoform M) Ampd1  
1434723\_at 0.75800 expressed sequence AI426748 AI426748  
1434724\_at 1.03133 ubiquitin specific peptidase 31 Usp31  
1434725\_at 0.88712 GRAM domain containing 1C Gramd1c  
1434726\_at 0.99069 transmembrane protein 146 Tmem146  
1434727\_at 0.98250 RIKEN cDNA 2900042E01 gene 2900042E01Rik  
1434728\_at 0.92209 "glutamate receptor, ionotropic, AMPA3 (alpha 3)" Gria3  
1434729\_at 0.86883 cDNA sequence AK129302 AK129302  
1434730\_at 1.00183 expressed sequence AI854517 AI854517  
1434731\_x\_at 1.01539 peroxiredoxin 1 Prdx1  
1434732\_x\_at 0.86864 Translocase of outer mitochondrial membrane 7 homolog (yeast) Tomm7  
1434733\_at 0.82857 "serine/threonine kinase 36 (fused homolog, *Drosophila*)" Stk36  
1434734\_at 1.00370 RIKEN cDNA E130016E03 gene E130016E03Rik  
1434735\_at 0.92600 hepatic leukemia factor Hlf  
1434736\_at 0.72542 hepatic leukemia factor Hlf  
1434737\_at 0.97108 oligonucleotide/oligosaccharide-binding fold containing 1 Obfc1  
1434738\_at 0.86320 threonyl-tRNA synthetase-like 2 Tarsl2  
1434739\_at 1.13097 fragile X mental retardation 1 neighbor Fmr1nb  
1434740\_at 0.98136 "scavenger receptor class F, member 2" Scarf2  
1434741\_at 1.87641 ras responsive element binding protein 1 Rreb1  
1434742\_s\_at 0.88435 RIKEN cDNA 2810401C16 gene 2810401C16Rik  
1434743\_x\_at 0.92009 RUN and SH3 domain containing 1 Rusc1  
1434744\_at 1.00750 yrdC domain containing (*E.coli*) Yrdc  
1434745\_at 0.98045 cyclin D2 Ccnd2  
1434746\_at 1.09158 MAX gene associated Mga  
1434747\_at 0.95759 chymotrypsin C (caldecrin) Ctrc  
1434748\_at 1.07562 cytoskeleton associated protein 2 Ckap2  
1434749\_at 1.06576 cDNA sequence BC067068 BC067068

|              |         |                                                                                         |               |
|--------------|---------|-----------------------------------------------------------------------------------------|---------------|
| 1434750_at   | 0.88067 | exocyst complex component 3                                                             | Exoc3         |
| 1434751_at   | 0.75172 | iduronate 2-sulfatase                                                                   | Ids           |
| 1434752_at   | 1.84943 | zinc finger protein 207                                                                 | Zfp207        |
| 1434753_at   | 1.08596 | nuclear factor related to kappa B binding protein                                       | Nfrkb         |
| 1434754_at   | 0.60760 | GTPase activating RANGAP domain-like 4                                                  | Garnl4        |
| 1434755_at   | 0.79258 | "coronin, actin binding protein, 2B"                                                    | Coro2b        |
| 1434756_at   | 0.83165 | hypothetical protein 5430421B17                                                         | 5430421B17    |
| 1434757_at   | 0.89221 | "core-binding factor, runt domain, alpha subunit 2, translocated to, 2 homolog (human)" | Cbfa2t2h      |
| 1434758_at   | 0.97027 | cysteine-rich secretory protein LCCL domain containing 2                                | Crispld2      |
| 1434759_at   | 1.06437 | leucine rich repeat transmembrane neuronal 3                                            | Lrrtm3        |
| 1434760_at   | 0.92834 | leucine rich repeat transmembrane neuronal 3                                            | Lrrtm3        |
| 1434761_at   | 1.03200 | leucine rich repeat transmembrane neuronal 3                                            | Lrrtm3        |
| 1434762_at   | 1.02848 | transmembrane protein 142B                                                              | Tmem142b      |
| 1434763_at   | 0.88701 | transmembrane protein 142B                                                              | Tmem142b      |
| 1434764_at   | 0.93344 | A kinase (PRKA) anchor protein 11                                                       | Akap11        |
| 1434765_at   | 1.00056 | E1A binding protein p300                                                                | Ep300         |
| 1434766_at   | 0.70728 | "Mus musculus, clone IMAGE:1512359, mRNA"                                               | ---           |
| 1434767_at   | 0.97705 | expressed sequence C79407                                                               | C79407        |
| 1434768_at   | 1.03164 | tripeptidyl peptidase I                                                                 | Tpp1          |
| 1434769_at   | 0.92793 | BTB (POZ) domain containing 9                                                           | Btbd9         |
| 1434770_at   | 0.81510 | IQ calmodulin-binding motif containing 1                                                | Iqcb1         |
| 1434771_at   | 0.95576 | RIKEN cDNA 0610011F06 gene                                                              | 0610011F06Rik |
| 1434772_at   | 1.07593 | adenosine A2b receptor                                                                  | Adora2b       |
| 1434773_a_at | 1.38598 | "solute carrier family 2 (facilitated glucose transporter), member 1"                   | Slc2a1        |
| 1434774_at   | 0.97171 | rhomboid 5 homolog 2 (Drosophila)                                                       | Rhbdf2        |
| 1434775_at   | 0.84128 | par-3 (partitioning defective 3) homolog (C. elegans)                                   | Pard3         |
| 1434776_at   | 0.96027 | ---                                                                                     | ---           |
| 1434777_at   | 0.92367 | "v-myc myelocytomatosis viral oncogene homolog 1, lung carcinoma derived (avian)"       | Mycl1         |
| 1434778_at   | 1.00992 | Transcribed locus                                                                       | ---           |
| 1434779_at   | 0.95338 | cerebellin 2 precursor protein                                                          | Cbln2         |
| 1434780_at   | 0.91965 | RIKEN cDNA C130038G02 gene                                                              | C130038G02Rik |
| 1434781_at   | 0.97613 | ---                                                                                     | ---           |
| 1434782_at   | 1.02720 | ubiquitin specific peptidase 42                                                         | Usp42         |
| 1434783_at   | 0.86435 | transmembrane protein 106C                                                              | Tmem106c      |
| 1434784_s_at | 0.83415 | transmembrane protein 106C                                                              | Tmem106c      |
| 1434785_at   | 1.00200 | "calcium channel, voltage-dependent, gamma subunit 5"                                   | Cacng5        |
| 1434786_at   | 1.01395 | "protein phosphatase 1, regulatory (inhibitor) subunit 12B"                             | Ppp1r12b      |
| 1434787_at   | 1.07046 | ADP-ribosylation factor 3                                                               | Arf3          |
| 1434788_at   | 1.06149 | RIKEN cDNA D930050A07 gene                                                              | D930050A07Rik |
| 1434789_at   | 1.04390 | DEP domain containing 1B                                                                | Depdc1b       |
| 1434790_a_at | 0.91336 | leukotriene A4 hydrolase                                                                | Lta4h         |

|              |         |                                                                                               |               |
|--------------|---------|-----------------------------------------------------------------------------------------------|---------------|
| 1434791_at   | 0.89197 | "ATPase, H <sup>+</sup> transporting, lysosomal V0 subunit A2"                                | Atp6v0a2      |
| 1434792_at   | 0.91938 | RIKEN cDNA 2010320M18 gene                                                                    | 2010320M18Rik |
| 1434793_at   | 0.95130 | WD repeat domain 78                                                                           | Wdr78         |
| 1434794_at   | 0.91401 | "ras homolog gene family, member f"                                                           | Rhof          |
| 1434795_at   | 0.95480 | dispatched homolog 1 (Drosophila)                                                             | Disp1         |
| 1434796_at   | 1.00499 | vesicle-associated membrane protein 4                                                         | Vamp4         |
| 1434797_at   | 0.95510 | RIKEN cDNA 6720469N11 gene                                                                    | 6720469N11Rik |
| 1434798_at   | 1.06440 | "ATPase, H <sup>+</sup> transporting, lysosomal V0 subunit D2"                                | Atp6v0d2      |
| 1434799_x_at | 1.13239 | "aldolase 1, A isoform"                                                                       | Aldoa         |
| 1434800_at   | 0.88628 | synaptic vesicle glycoprotein 2 b                                                             | Sv2b          |
| 1434801_x_at | 1.04704 | "solute carrier family 25 (mitochondrial carrier, adenine nucleotide translocator), member 5" | Slc25a5       |
| 1434802_s_at | 0.97370 | neurotrophin 3                                                                                | Ntf3          |
| 1434803_a_at | 0.86438 | syncollin                                                                                     | Sycn          |
| 1434804_at   | 0.97521 | SEC15-like 2 (S. cerevisiae)                                                                  | Sec15l2       |
| 1434805_at   | 0.91095 | myeloid/lymphoid or mixed lineage-leukemia translocation to 1 homolog (Drosophila)            | Mllt1         |
| 1434806_at   | 0.84431 | metaxin 3                                                                                     | Mtx3          |
| 1434807_s_at | 0.85607 | metaxin 3                                                                                     | Mtx3          |
| 1434808_at   | 1.19374 | cDNA sequence BC066140                                                                        | BC066140      |
| 1434809_at   | 1.05932 | Rho GTPase activating protein 28                                                              | Arhgap28      |
| 1434810_a_at | 1.06959 | cancer antigen 1                                                                              | Cage1         |
| 1434811_at   | 1.01785 | cancer antigen 1                                                                              | Cage1         |
| 1434812_s_at | 0.88277 | docking protein 7                                                                             | Dok7          |
| 1434813_x_at | 1.07845 | tryptophanyl-tRNA synthetase                                                                  | Wars          |
| 1434814_x_at | 1.04225 | glucose phosphate isomerase 1                                                                 | Gpi1          |
| 1434815_a_at | 1.05986 | mitogen-activated protein kinase-activated protein kinase 3                                   | Mapkapk3      |
| 1434816_at   | 0.97932 | vacuolar protein sorting 33A (yeast)                                                          | Vps33a        |
| 1434817_s_at | 0.98750 | RIKEN cDNA 4930535B03 gene                                                                    | 4930535B03Rik |
| 1434818_at   | 0.94712 | hypothetical protein 9330159K06                                                               | 9330159K06    |
| 1434819_at   | 0.98652 | "beta galactoside alpha 2,6 sialyltransferase 2"                                              | St6gal2       |
| 1434820_s_at | 0.84605 | "protein kinase inhibitor, gamma"                                                             | Pkig          |
| 1434821_at   | 0.97341 | bromodomain containing 1                                                                      | Brd1          |
| 1434822_at   | 0.99348 | periphilin 1                                                                                  | Pphln1        |
| 1434823_x_at | 0.87047 | myeloma overexpressed 2                                                                       | Myeov2        |
| 1434824_at   | 0.97267 | "bromodomain adjacent to zinc finger domain, 1B"                                              | Baz1b         |
| 1434825_at   | 0.77803 | similar to CAGL79                                                                             | LOC381742     |
| 1434826_at   | 0.92363 | expressed sequence AI256775                                                                   | AI256775      |
| 1434827_at   | 1.13064 | THO complex 6 homolog (Drosophila)                                                            | Thoc6         |
| 1434828_at   | 0.99184 | RIKEN cDNA B430201A12 gene                                                                    | B430201A12Rik |
| 1434829_at   | 1.07653 | Casitas B-lineage lymphoma                                                                    | Cbl           |
| 1434830_at   | 0.84665 | MAX dimerization protein 1                                                                    | Mxd1          |
| 1434831_a_at | 0.99352 | forkhead box O3a                                                                              | Foxo3a        |

1434832\_at 0.98803 forkhead box O3a Foxo3a  
1434833\_at 0.91083 Mitogen activated protein kinase kinase kinase 2 Map4k2  
1434834\_at 0.82854 suppressor of cytokine signaling 7 Socs7  
1434835\_at 1.01825 wings apart-like homolog (Drosophila) Wapal  
1434836\_at 0.94884 "nuclear factor of activated T-cells, cytoplasmic, calcineurin-dependent 2 interacting protein" Nfatc2ip  
1434837\_at 0.91570 mediator of DNA damage checkpoint 1 Mdc1  
1434838\_at 1.00595 similar to Potassium voltage-gated channel subfamily G member 2 (Voltage-gated potassium channel subunit Kv6.2) (Cardiac potassium channel subunit) LOC240444  
1434839\_s\_at 0.92488 transducin (beta)-like 1X-linked receptor 1 Tbl1xr1  
1434840\_at 0.90219 HIV-1 Rev binding protein Hrb  
1434841\_at 1.17788 CDNA sequence BC010584 BC010584  
1434842\_s\_at 1.03182 UPF3 regulator of nonsense transcripts homolog B (yeast) Upf3b  
1434843\_at 1.04230 RIKEN cDNA A430041B07 gene A430041B07Rik  
1434844\_at 0.92492 "hexosaminidase (glycosyl hydrolase family 20, catalytic domain) containing" Hexdc  
1434845\_at 1.01599 Expressed sequence AI195381 AI195381  
1434846\_at 1.01838 RIKEN cDNA 1700065A05 gene 1700065A05Rik  
1434847\_at 0.93672 --- ---  
1434848\_at 0.94690 Transcribed locus ---  
1434849\_at 1.00686 TSPY-like 2 Tspyl2  
1434850\_at 0.95388 IQ motif containing GTPase activating protein 3 Iqgap3  
1434851\_s\_at 0.88509 crumbs homolog 3 (Drosophila) Crb3  
1434852\_at 1.06528 "phospholipase A2, group IIF" Pla2g2f  
1434853\_x\_at 0.86588 "makorin, ring finger protein, 1" Mkrn1  
1434854\_a\_at 0.98774 ribosomal protein S10 Rps10  
1434855\_at 1.16677 amidohydrolase domain containing 2 Amdhd2  
1434856\_at 0.90252 ankyrin repeat domain 44 Ankrd44  
1434857\_at 0.90442 RIKEN cDNA A230106D06 gene A230106D06Rik  
1434858\_x\_at 1.13129 zinc finger protein 511 Zfp511  
1434859\_at 0.94651 uridine monophosphate synthetase Umps  
1434860\_at 0.83761 NMDA receptor-regulated gene 3 Narg3  
1434861\_at 0.96350 Transcribed locus ---  
1434862\_at 1.09376 fucosyltransferase 2 Fut2  
1434863\_at 0.97625 expressed sequence AU041129 AU041129  
1434864\_at 0.88587 non imprinted in Prader-Willi/Angelman syndrome 1 homolog (human) Nipa1  
1434865\_a\_at 0.93606 exocyst complex component 7 Exoc7  
1434866\_x\_at 0.86671 "carnitine palmitoyltransferase 1a, liver" Cpt1a  
1434867\_at 1.05787 "solute carrier family 4, sodium bicarbonate transporter-like, member 11" Slc4a11  
1434868\_at 0.99739 RIKEN cDNA 4933431E20 gene 4933431E20Rik  
1434869\_at 0.86767 tudor domain containing 3 Tdrd3

1434870\_at 1.02614 RIKEN cDNA 2810004N23 gene 2810004N23Rik  
 1434871\_at 1.02138 "cytochrome c oxidase, subunit XVII assembly protein homolog (yeast)"  
 Cox17  
 1434872\_x\_at 0.95177 ribosomal protein L37 /// similar to ribosomal protein L37 Rpl37 ///  
 LOC383438  
 1434873\_a\_at 0.98706 "centaurin, beta 1" Centb1  
 1434874\_x\_at 1.00742 "centaurin, beta 1" Centb1  
 1434875\_a\_at 1.07637 high mobility group nucleosomal binding domain 3 Hmgn3  
 1434876\_at 1.05537 glycosyltransferase 8 domain containing 3 Glt8d3  
 1434877\_at 1.08325 neuronal pentraxin 1 Nptx1  
 1434878\_at 1.09414 "SLIT and NTRK-like family, member 4" Slitrk4  
 1434879\_at 1.07609 cell division cycle 34 homolog (S. cerevisiae) Cdc34  
 1434880\_at 1.02529 ets variant gene 6 (TEL oncogene) Etv6  
 1434881\_s\_at 0.84594 potassium channel tetramerisation domain containing 12 Kctd12  
 1434882\_at 1.06508 Metadherin Mtdh  
 1434883\_at 1.11103 Metadherin Mtdh  
 1434884\_at 0.99187 Metadherin Mtdh  
 1434885\_at 0.79943 "SPT2, Suppressor of Ty, domain containing 1 (S. cerevisiae)" Spty2d1  
 1434886\_at 1.16037 --- ---  
 1434887\_at 0.94511 frequenin homolog (Drosophila) Freq  
 1434888\_a\_at 0.86756 matrin 3 Matr3  
 1434889\_at 0.96786 "pleckstrin homology domain containing, family A member 7" Plekha7  
 1434890\_at 0.94154 optic atrophy 1 homolog (human) Opa1  
 1434891\_at 0.80851 prostaglandin F2 receptor negative regulator Ptgfrn  
 1434892\_x\_at 0.90866 retinoblastoma binding protein 4 Rbbp4  
 1434893\_at 0.99154 "ATPase, Na<sup>+</sup>/K<sup>+</sup> transporting, alpha 2 polypeptide" Atp1a2  
 1434894\_at 1.17129 zinc finger CCCH type containing 13 Zc3h13  
 1434895\_s\_at 0.75115 "protein phosphatase 1, regulatory (inhibitor) subunit 13B" Ppp1r13b  
 1434896\_at 0.95201 "zinc finger protein 422, related sequence 1" Zfp422-rs1  
 1434897\_a\_at 0.99651 "solute carrier family 25 (mitochondrial carrier, adenine nucleotide  
 translocator), member 4" Slc25a4  
 1434898\_at 0.87693 trinucleotide repeat containing 6a Tnrc6a  
 1434899\_s\_at 0.97999 trinucleotide repeat containing 6a Tnrc6a  
 1434900\_at 0.96387 MKL (megakaryoblastic leukemia)/myocardin-like 1 Mk11  
 1434901\_at 0.89544 "gene model 1103, (NCBI)" Gm1103  
 1434902\_at 0.77012 ring finger protein 157 Rnf157  
 1434903\_s\_at 1.02505 interleukin 1 receptor-like 2 Il1rl2  
 1434904\_at 0.99058 human immunodeficiency virus type I enhancer binding protein 2 Hivep2  
 1434905\_at 0.93396 cDNA sequence BC064011 BC064011  
 1434906\_at 0.85817 RIKEN cDNA 0610005C13 gene 0610005C13Rik  
 1434907\_at 0.95288 TATA box binding protein-like 1 Tbp1l  
 1434908\_at 1.01514 expressed sequence AI480556 AI480556  
 1434909\_at 0.95267 Ras-related GTP binding D Rragd

1434910\_at 0.88304 --- ---  
1434911\_s\_at 1.02224 Rho GTPase activating protein 19 Arhgap19  
1434912\_at 1.12782 resistance to inhibitors of cholinesterase 3 homolog (C. elegans) Ric3  
1434913\_at 1.11784 3-hydroxymethyl-3-methylglutaryl-Coenzyme A lyase-like 1 Hmgcll1  
1434914\_at 0.77077 "RAB6B, member RAS oncogene family" Rab6b  
1434915\_s\_at 1.06190 leucine rich repeat containing 19 Lrrc19  
1434916\_at 0.89608 "vitamin K epoxide reductase complex, subunit 1-like 1" Vkorc111  
1434917\_at 0.84156 cordon-bleu Cobl  
1434918\_at 0.96877 SRY-box containing gene 6 Sox6  
1434919\_at 1.06530 Transcribed locus ---  
1434920\_a\_at 0.82506 Ena-vasodilator stimulated phosphoprotein Evl  
1434921\_at 0.93752 "nuclear receptor subfamily 2, group E, member 1" Nr2e1  
1434922\_at 1.04386 PHD finger protein 12 Phf12  
1434923\_at 0.89000 RIKEN cDNA 2810437L13 gene 2810437L13Rik  
1434924\_at 0.98940 PHD finger protein 2 Phf2  
1434925\_at 0.92099 RIKEN cDNA 4833424O15 gene 4833424O15Rik  
1434926\_at 0.99160 Rho guanine nucleotide exchange factor (GEF) 11 /// similar to Rho guanine nucleotide exchange factor (GEF) 11 Arhgef11 /// LOC673478  
1434927\_at 0.94089 "heat shock protein family, member 7 (cardiovascular)" Hspb7  
1434928\_at 1.03706 growth arrest-specific 2 like 1 Gas2l1  
1434929\_at 0.97975 cDNA sequence BC035044 BC035044  
1434930\_at 0.85395 two pore channel 1 Tpcn1  
1434931\_at 0.78269 neogenin Neol  
1434932\_at 0.83313 "adenosine deaminase, RNA-specific, B1" Adarb1  
1434933\_at 1.09357 RIKEN cDNA 5730557L09 gene 5730557L09Rik  
1434934\_at 0.91079 ATP synthase mitochondrial F1 complex assembly factor 1 Atpaf1  
1434935\_at 1.01141 hypothetical protein LOC637741 LOC637741  
1434936\_at 1.15036 HIRA interacting protein 3 Hirip3  
1434937\_at 0.90589 "pam, highwire, rpm 1" Phr1  
1434938\_at 0.97082 RNA binding motif protein 9 Rbm9  
1434939\_at 0.95171 forkhead box F1a Foxf1a  
1434940\_x\_at 1.13132 regulator of G-protein signaling 19 Rgs19  
1434941\_s\_at 1.13078 RIKEN cDNA 2610101J03 gene 2610101J03Rik  
1434942\_at 1.07638 RIKEN cDNA 2610101J03 gene 2610101J03Rik  
1434943\_at 0.97930 cDNA sequence BC023055 BC023055  
1434944\_at 0.80830 dystrophin myotonic-protein kinase Dmpk  
1434945\_at 0.96666 acyltransferase like 1 Ayt1l  
1434946\_at 1.09503 RIKEN cDNA C330021A05 gene C330021A05Rik  
1434947\_at 0.81216 kinesin family member 3C Kif3c  
1434948\_at 0.87524 RAB11 family interacting protein 2 (class I) Rab11fip2  
1434949\_at 0.89981 armadillo repeat containing 8 Armc8  
1434950\_a\_at 0.94909 armadillo repeat containing 8 Armc8  
1434951\_at 0.85543 armadillo repeat containing 8 Armc8

1434952\_at 0.81249 COX4 neighbor Cox4nb  
1434953\_at 0.91632 "Adult male pituitary gland cDNA, RIKEN full-length enriched library, clone:5330439J20 product:unclassifiable, full insert sequence" ---  
1434954\_at 1.09183 --- ---  
1434955\_at 1.00442 membrane-associated ring finger (C3HC4) 1 1-Mar  
1434956\_at 0.92198 similar to ring finger protein 170 /// similar to ring finger protein 170  
LOC668047 /// LOC676342  
1434957\_at 0.79371 cell adhesion molecule-related/down-regulated by oncogenes Cdon  
1434958\_at 0.96603 saccin Sacs  
1434959\_at 0.89535 desert hedgehog Dhh  
1434960\_at 0.97566 "TAF9B RNA polymerase II, TATA box binding protein (TBP)-associated factor" Taf9b  
1434961\_at 0.88387 ankyrin repeat and SOCS box-containing protein 1 Asb1  
1434962\_x\_at 0.90358 chemokine (C-C motif) ligand 27 Ccl27  
1434963\_at 1.16383 suppressor of Ty 3 homolog (S. cerevisiae) Supt3h  
1434964\_at 0.90990 expressed sequence AA408420 AA408420  
1434965\_at 1.02020 "DNA segment, Chr 19, ERATO Doi 386, expressed" D19Ertd386e  
1434966\_at 1.04112 "splicing factor, arginine/serine-rich 8" Sfrs8  
1434967\_at 1.21648 "zinc finger, SWIM domain containing 6" Zswim6  
1434968\_a\_at 0.96125 ARP3 actin-related protein 3 homolog (yeast) Actr3  
1434969\_at 0.83130 "bruno-like 5, RNA binding protein (Drosophila)" Brunol5  
1434970\_a\_at 0.97564 --- ---  
1434971\_x\_at 0.97942 --- ---  
1434972\_x\_at 0.98694 "splicing factor, arginine/serine-rich 1 (ASF/SF2)" Sfrs1  
1434973\_at 0.94518 carbonic anhydrase 7 Car7  
1434974\_at 2.29609 "pyruvate dehydrogenase kinase, isoenzyme 1" Pdk1  
1434975\_x\_at 0.86176 RIKEN cDNA 4933439C20 gene 4933439C20Rik  
1434976\_x\_at 1.12831 eukaryotic translation initiation factor 4E binding protein 1 Eif4ebp1  
1434977\_at 0.85243 RIKEN cDNA 4933403F05 gene 4933403F05Rik  
1434978\_at 0.96734 RIKEN cDNA 4933403F05 gene 4933403F05Rik  
1434979\_at 0.99424 RIKEN cDNA 4933403F05 gene 4933403F05Rik  
1434980\_at 0.99179 "phosphoinositide-3-kinase, regulatory subunit 5, p101" Pik3r5  
1434981\_at 0.99808 RIKEN cDNA E130303B06 gene E130303B06Rik  
1434982\_at 0.77148 Ring finger protein 182 Rnf182  
1434983\_at 0.86309 RIKEN cDNA B230363K08 gene B230363K08Rik  
1434984\_at 0.91105 RIKEN cDNA 6330514A18 gene 6330514A18Rik  
1434985\_a\_at 1.03508 eukaryotic translation initiation factor 4A1 Eif4a1  
1434986\_a\_at 0.95728 Sec61 alpha 1 subunit (S. cerevisiae) Sec61a1  
1434987\_at 0.77668 "aldehyde dehydrogenase 2, mitochondrial" Aldh2  
1434988\_x\_at 0.95397 "aldehyde dehydrogenase 2, mitochondrial" Aldh2  
1434989\_at 1.03443 cDNA sequence BC042720 BC042720  
1434990\_at 0.96668 protein phosphatase 1E (PP2C domain containing) Ppm1e  
1434991\_at 0.82074 F-box and WD-40 domain protein 17 Fbxw17



|              |         |                                                                                           |               |
|--------------|---------|-------------------------------------------------------------------------------------------|---------------|
| 1434992_at   | 0.87286 | RIKEN cDNA 9130206N08 gene                                                                | 9130206N08Rik |
| 1434993_at   | 1.02203 | RIKEN cDNA B830045N13 gene                                                                | B830045N13Rik |
| 1434994_at   | 0.88547 | death effector domain-containing                                                          | Dedd          |
| 1434995_s_at | 0.95656 | death effector domain-containing                                                          | Dedd          |
| 1434996_at   | 0.98457 | "solute carrier family 25 (mitochondrial carrier, Graves disease autoantigen), member 16" | Slc25a16      |
| 1434997_at   | 0.90960 | cell division cycle 2-like 6 (CDK8-like)                                                  | Cdc216        |
| 1434998_at   | 1.01867 | IQ motif containing GTPase activating protein 1                                           | Iqgap1        |
| 1434999_at   | 1.00153 | suppressor of variegation 4-20 homolog 1 (Drosophila)                                     | Suv420h1      |
| 1435000_at   | 1.05339 | G1 to S phase transition 1                                                                | Gspt1         |
| 1435001_at   | 0.97075 | "phospholipase A2, activating protein"                                                    | Plaa          |
| 1435002_at   | 1.08183 | zinc finger protein 507                                                                   | zfp507        |
| 1435003_at   | 1.07057 | "phosphatidylinositol 4-kinase, catalytic, alpha polypeptide"                             | Pik4ca        |
| 1435004_at   | 0.90344 | pantothenate kinase 4                                                                     | Pank4         |
| 1435005_at   | 1.00925 | centromere protein E                                                                      | Cenpe         |
| 1435006_s_at | 0.98877 | "ATP-binding cassette, sub-family B (MDR/TAP), member 7"                                  | Abcb7         |
| 1435007_s_at | 1.02148 | expressed sequence AI132487                                                               | AI132487      |
| 1435008_at   | 0.87851 | "solute carrier family 9 (sodium/hydrogen exchanger), isoform 6"                          | Slc9a6        |
| 1435009_at   | 1.00150 | "solute carrier family 9 (sodium/hydrogen exchanger), isoform 6"                          | Slc9a6        |
| 1435010_at   | 0.86564 | ankyrin repeat and SOCS box-containing protein 7                                          | Asb7          |
| 1435011_x_at | 0.99083 | "aldo-keto reductase family 1, member A4 (aldehyde reductase)"                            | Akr1a4        |
| 1435012_x_at | 1.10710 | "elastase 3, pancreatic /// similar to elastase 3B, pancreatic"                           | Ela3 ///      |
| LOC638418    |         |                                                                                           |               |
| 1435013_at   | 1.03440 | HEAT repeat containing 2                                                                  | Heatr2        |
| 1435014_at   | 1.03139 | "RAB39B, member RAS oncogene family"                                                      | Rab39b        |
| 1435015_at   | 1.02259 | RIKEN cDNA 2210018M03 gene                                                                | 2210018M03Rik |
| 1435016_at   | 0.91795 | "trafficking protein, kinesin binding 2"                                                  | Trak2         |
| 1435017_at   | 0.99041 | melanoma nuclear protein 13                                                               | Mel13         |
| 1435018_at   | 0.91014 | RIKEN cDNA 5930434B04 gene                                                                | 5930434B04Rik |
| 1435019_at   | 0.94204 | ataxin 7-like 3                                                                           | Atxn7l3       |
| 1435020_at   | 0.94993 | serologically defined colon cancer antigen 1                                              | Sdccag1       |
| 1435021_at   | 0.97761 | "gamma-aminobutyric acid (GABA-A) receptor, subunit beta 3"                               | Gabrb3        |
| 1435022_at   | 0.85260 | cartilage homeo protein 1                                                                 | Cart1         |
| 1435023_at   | 1.02645 | intersectin 2                                                                             | Itsn2         |
| 1435024_at   | 0.83526 | RIKEN cDNA 4931428F04 gene                                                                | 4931428F04Rik |
| 1435025_at   | 0.99974 | 2-oxoglutarate and iron-dependent oxygenase domain containing 1                           | Ogfod1        |
| 1435026_at   | 0.87267 | "sparc/osteonectin, cwcv and kazal-like domains proteoglycan 2"                           | Spock2        |
| 1435027_at   | 0.88793 | "golgi autoantigen, golgin subfamily a, 1"                                                | Golga1        |
| 1435028_at   | 0.91854 | WD repeat domain 7                                                                        | Wdr7          |
| 1435029_at   | 0.87101 | ---                                                                                       | ---           |
| 1435030_at   | 1.05925 | UPF2 regulator of nonsense transcripts homolog (yeast)                                    | Upf2          |
| 1435031_at   | 0.98513 | RIKEN cDNA 2010310D06 gene                                                                | 2010310D06Rik |
| 1435032_at   | 0.88470 | "golgi autoantigen, golgin subfamily b, macrogolgin 1"                                    | Golgb1        |

1435033\_at 1.07772 Rho guanine nucleotide exchange factor (GEF) 4 Arhgef4  
1435034\_at 1.16425 expressed sequence AW060207 AW060207  
1435035\_at 1.09356 RNA (guanine-9-) methyltransferase domain containing 2 Rg9mtd2  
1435036\_at 0.94416 RIKEN cDNA A530050D06 gene A530050D06Rik  
1435037\_at 1.06988 per1-like domain containing 1 Perld1  
1435038\_s\_at 1.01114 AP2 associated kinase 1 Aak1  
1435039\_a\_at 0.96081 "Phosphatidylinositol-4-phosphate 5-kinase, type 1 beta" Pip5k1b  
1435040\_at 1.00047 interleukin-1 receptor-associated kinase 3 Irak3  
1435041\_at 0.91386 "myosin, light polypeptide 6, alkali, smooth muscle and non-muscle" Myl6  
1435042\_at 1.00228 RIKEN cDNA 9130004C02 gene 9130004C02Rik  
1435043\_at 1.01246 "phospholipase C, beta 1" Plcb1  
1435044\_at 0.94766 early B-cell factor 4 Ebf4  
1435045\_s\_at 0.92911 mitogen-activated protein kinase 8 interacting protein 2 Mapk8ip2  
1435046\_at 1.12246 Myosin ID Myo1d  
1435047\_at 0.98408 Transcribed locus ---  
1435048\_at 0.95438 expressed sequence AI854703 AI854703  
1435049\_s\_at 0.95250 expressed sequence AI854703 AI854703  
1435050\_at 0.70339 "DNA segment, Chr 10, Brigham & Women's Genetics 1379 expressed"  
D10Bwg1379e  
1435051\_at 0.99660 WD repeat domain 44 Wdr44  
1435052\_at 0.88101 RIKEN cDNA 4930455F23 gene 4930455F23Rik  
1435053\_s\_at 1.12960 "pleckstrin homology domain containing, family H (with MyTH4 domain)  
member 1" Plekhh1  
1435054\_at 1.04164 essential meiotic endonuclease 1 homolog 1 (S. pombe) Eme1  
1435055\_a\_at 1.09475 target of myb1 homolog (chicken) /// similar to TOM1 Tom1 /// LOC545878  
1435056\_x\_at 0.82327 protein O-fucosyltransferase 2 Pofut2  
1435057\_x\_at 0.90681 polymerase (RNA) I polypeptide E Polr1e  
1435058\_x\_at 1.02371 syntaxin binding protein 3A Stxbp3a  
1435059\_at 0.98727 development and differentiation enhancing Ddef1  
1435060\_at 0.96965 tropomodulin 2 Tmod2  
1435061\_at 0.96709 nudix (nucleoside diphosphate linked moiety X)-type motif 10 Nudt10  
1435062\_at 0.88153 RIKEN cDNA 1500001A10 gene 1500001A10Rik  
1435063\_at 1.00937 "similar to CG8312-PA, isoform A" LOC625638  
1435064\_a\_at 1.05293 transmembrane protein 27 Tmem27  
1435065\_x\_at 1.02280 Vav2 oncogene Vav2  
1435066\_at 0.89664 "phosphatidylinositol transfer protein, cytoplasmic 1" Pitpnc1  
1435067\_at 0.97521 RIKEN cDNA B230208H17 gene B230208H17Rik  
1435068\_at 1.04167 "phosphatidylinositol-4-phosphate 5-kinase, type II, beta" Pip5k2b  
1435069\_at 0.95072 cDNA sequence BC064078 BC064078  
1435070\_at 0.95594 AE binding protein 2 Aebp2  
1435071\_at 0.84289 "zinc finger, FYVE domain containing 1" Zfyve1  
1435072\_at 0.94494 "zinc finger, FYVE domain containing 1" Zfyve1  
1435073\_a\_at 0.95908 armadillo repeat containing 9 Armc9

1435074\_at 0.90108 transmembrane protein 106B Tmem106b  
1435075\_at 0.82507 transmembrane protein 106B Tmem106b  
1435076\_at 1.11152 RIKEN cDNA 2310047D13 gene 2310047D13Rik  
1435077\_at 0.98125 additional sex combs like 1 (Drosophila) Asx11  
1435078\_at 0.84555 "tetratricopeptide repeat, ankyrin repeat and coiled-coil containing 2" Tanc2  
1435079\_at 1.01571 RIKEN cDNA 5730406M06 gene 5730406M06Rik  
1435080\_x\_at 1.13042 RIKEN cDNA 5730406M06 gene 5730406M06Rik  
1435081\_at 1.06398 synaptophysin-like protein Sypl  
1435082\_at 1.07961 synaptophysin-like protein Sypl  
1435083\_at 0.78781 cortexin 1 Ctxn1  
1435084\_at 0.99896 RIKEN cDNA C730049O14 gene C730049O14Rik  
1435085\_at 0.90281 cAMP responsive element binding protein-like 2 Crebl2  
1435086\_s\_at 0.92389 kelch domain containing 2 Klhdc2  
1435087\_at 0.87865 cDNA sequence BC039093 BC039093  
1435088\_at 0.99027 nuclear receptor-binding SET-domain protein 1 Nsd1  
1435089\_at 1.09944 RIKEN cDNA 2010111I01 gene 2010111I01Rik  
1435090\_at 0.95598 "tubulin, gamma complex associated protein 6" Tubgcp6  
1435091\_at 1.06984 zinc finger protein 568 Zfp568  
1435092\_at 0.99234 ADP-ribosylation factor-like 4A Arl4a  
1435093\_at 0.88370 "zinc finger, FYVE domain containing 20" Zfyve20  
1435094\_at 0.95174 "potassium inwardly-rectifying channel, subfamily J, member 16" Kcnj16  
1435095\_at 0.93677 RIKEN cDNA C030009O12 gene C030009O12Rik  
1435096\_at 0.91718 resistance to inhibitors of cholinesterase 8 homolog B (C. elegans) Ric8b  
1435097\_at 1.10835 methylmalonic aciduria (cobalamin deficiency) type B homolog (human)  
Mmab  
1435098\_at 1.09067 similar to Na+ dependent glucose transporter 1 LOC213332  
1435099\_at 1.09625 "UTP14, U3 small nucleolar ribonucleoprotein, homolog A (yeast)" Utp14a  
1435100\_at 1.02794 RIKEN cDNA A130042E20 gene A130042E20Rik  
1435101\_at 0.94683 "Der1-like domain family, member 2" Derl2  
1435102\_a\_at 0.94324 syntaxin 18 Stx18  
1435103\_x\_at 1.03627 "phenylalanine-tRNA synthetase-like, beta subunit" Farslb  
1435104\_at 1.08998 RIKEN cDNA D130004H04 gene D130004H04Rik  
1435105\_at 0.94901 RIKEN cDNA 1110061N23 gene 1110061N23Rik  
1435106\_at 0.83584 RIKEN cDNA 3732412D22 gene 3732412D22Rik  
1435107\_at 1.01371 expressed sequence AW456874 AW456874  
1435108\_at 1.06429 Rho GTPase activating protein 22 Arhgap22  
1435109\_at 0.78717 RIKEN cDNA 0710007G10 gene /// RIKEN cDNA 3010001K23 gene  
0710007G10Rik /// 3010001K23Rik  
1435110\_at 0.84824 unc-5 homolog B (C. elegans) Unc5b  
1435111\_at 0.97930 RIKEN cDNA 2310011E23 gene 2310011E23Rik  
1435112\_a\_at 0.96283 "ATP synthase, H+ transporting, mitochondrial F0 complex, subunit d" Atp5h  
1435113\_x\_at 0.95670 stathmin-like 3 Stmn3  
1435114\_at 0.92977 WD repeat and HMG-box DNA binding protein 1 Wdhd1

1435115\_at 1.12337 fibronectin type III domain containing 5 Fndc5  
1435116\_at 0.93603 RIKEN cDNA 4933403G14 gene 4933403G14Rik  
1435117\_a\_at 0.88825 RIKEN cDNA C330021A05 gene C330021A05Rik  
1435118\_at 0.96184 "tRNA splicing endonuclease 2 homolog (SEN2, *S. cerevisiae*)" Tsen2  
1435119\_at 1.11745 "Adult male medulla oblongata cDNA, RIKEN full-length enriched library, clone:6330578N16 product:unclassifiable, full insert sequence" ---  
1435120\_at 1.04287 Transcribed locus ---  
1435121\_at 1.02223 "deiodinase, iodothyronine type III, antisense" Dio3as  
1435122\_x\_at 0.99412 DNA methyltransferase (cytosine-5) 1 Dnmt1  
1435123\_at 1.03121 RIKEN cDNA C030014M07 gene /// similar to RIKEN cDNA C920006C10 C030014M07Rik /// LOC668212  
1435124\_at 1.04188 hypothetical gene supported by AK045595 LOC328644  
1435125\_at 0.98516 expressed sequence BB120497 BB120497  
1435126\_at 0.92463 Dual specificity phosphatase-like 15 Dusp15  
1435127\_a\_at 1.05323 O-sialoglycoprotein endopeptidase-like 1 Osgepl1  
1435128\_at 1.05275 brain-specific angiogenesis inhibitor 1-associated protein 2 Baiap2  
1435129\_at 0.88106 Protein tyrosine phosphatase 4a2 Ptp4a2  
1435130\_at 1.02203 similar to RIKEN cDNA 1810036I24 LOC383103  
1435131\_at 0.96261 zinc finger protein 13 Zfp13  
1435132\_at 1.13849 dispatched homolog 1 (*Drosophila*) Disp1  
1435133\_at 1.07307 UDP-glucose ceramide glucosyltransferase Ugcg  
1435134\_at 0.95020 arylacetamide deacetylase-like 1 Aadacl1  
1435135\_at 0.90880 arylacetamide deacetylase-like 1 Aadacl1  
1435136\_at 1.04790 Wolf-Hirschhorn syndrome candidate 1 (human) Whsc1  
1435137\_s\_at 1.32287 RIKEN cDNA 1200015M12 gene /// RIKEN cDNA 1200016E24 gene /// RIKEN cDNA A130040M12 gene /// RIKEN cDNA E430024C06 gene 1200015M12Rik /// 1200016E24Rik /// A130040M12Rik /// E430024C06Rik  
1435138\_at 0.92102 transmembrane protein 28 Tmem28  
1435139\_at 1.08208 NMDA receptor-regulated gene 1 Narg1  
1435140\_at 0.99501 insulin degrading enzyme Ide  
1435141\_at 0.94398 SFT2 domain containing 2 Sft2d2  
1435142\_at 0.98972 SFT2 domain containing 2 Sft2d2  
1435143\_at 1.08926 PCTAIRE-motif protein kinase 2 Pctk2  
1435144\_at 1.00124 Prohibitin Phb  
1435145\_at 0.85228 "immunoglobulin superfamily, member 4" Igsf4d  
1435146\_s\_at 0.79017 "immunoglobulin superfamily, member 4" Igsf4d  
1435147\_x\_at 0.93548 "immunoglobulin superfamily, member 4" Igsf4d  
1435148\_at 0.95283 "ATPase, Na<sup>+</sup>/K<sup>+</sup> transporting, beta 2 polypeptide" Atp1b2  
1435149\_at 0.91136 "phospholipase C, gamma 1" Plcg1  
1435150\_at 0.90150 "2 days neonate sympathetic ganglion cDNA, RIKEN full-length enriched library, clone:7120492P10 product:hypothetical protein, full insert sequence" ---  
1435151\_a\_at 1.03195 ribosomal protein S3 Rps3  
1435152\_at 1.29799 leukocyte receptor cluster (LRC) member 8 Leng8

1435153\_at 0.83510 BTB (POZ) domain containing 6 Btbd6  
 1435154\_at 1.03228 "similar to solute carrier family 7 (cationic amino acid transporter, y+ system), member 3" LOC245128  
 1435155\_at 1.28799 cingulin Cgn  
 1435156\_at 0.88256 cDNA sequence BC046331 BC046331  
 1435157\_at 0.87346 RIKEN cDNA 5830454D03 gene 5830454D03Rik  
 1435158\_at 0.93202 RNA binding motif protein 12B Rbm12b  
 1435159\_at 1.20010 RIKEN cDNA 9430038I01 gene 9430038I01Rik  
 1435160\_at 0.97607 RIKEN cDNA 1110064P04 gene 1110064P04Rik  
 1435161\_at 0.96014 "DNA segment, Chr 5, ERATO Doi 135, expressed" D5Ertd135e  
 1435162\_at 1.74801 "protein kinase, cGMP-dependent, type II" Prkg2  
 1435163\_at 1.18283 RIKEN cDNA 9030612M13 gene 9030612M13Rik  
 1435164\_s\_at 0.98761 ubiquitin-activating enzyme E1C Ube1c  
 1435165\_at 0.98045 contactin 2 Cntn2  
 1435166\_at 1.12814 contactin 2 Cntn2  
 1435167\_at 0.76218 RAN binding protein 6 Ranbp6  
 1435168\_at 0.98420 zinc finger protein 710 Zfp710  
 1435169\_at 1.02965 RIKEN cDNA A930001N09 gene A930001N09Rik  
 1435170\_at 0.96539 "TSR2, 20S rRNA accumulation, homolog (*S. cerevisiae*)" Tsr2  
 1435171\_at 0.62077 RIKEN cDNA 2810416G20 gene 2810416G20Rik  
 1435172\_at 1.01598 eomesodermin homolog (*Xenopus laevis*) Eomes  
 1435173\_at 0.89165 arginine-tRNA-protein transferase 1 Ate1  
 1435174\_at 1.23711 "rosbin, round spermatid basic protein 1" Rsb1  
 1435175\_at 1.10699 cDNA sequence BC034090 BC034090  
 1435176\_a\_at 0.71745 inhibitor of DNA binding 2 Id2  
 1435177\_a\_at 0.93020 anaphase-promoting complex subunit 5 Anapc5  
 1435178\_x\_at 0.91734 anaphase-promoting complex subunit 5 Anapc5  
 1435179\_at 0.89989 RIKEN cDNA C130071C03 gene C130071C03Rik  
 1435180\_at 1.13655 podocan Podn  
 1435181\_at 1.04415 expressed sequence AI461788 AI461788  
 1435182\_at 0.90036 RIKEN cDNA C530028I08 gene C530028I08Rik  
 1435183\_at 0.96559 TBK1 binding protein 1 Tbkbp1  
 1435184\_at 0.96337 natriuretic peptide receptor 3 Npr3  
 1435185\_at 0.93906 leucine rich repeat and coiled-coil domain containing 1 Lrrcc1  
 1435186\_s\_at 0.89992 leucine rich repeat and coiled-coil domain containing 1 Lrrcc1  
 1435187\_at 0.85553 Translocase of outer mitochondrial membrane 20 homolog (yeast) Tomm20  
 1435188\_at 1.99016 "gene model 129, (NCBI)" Gm129  
 1435189\_at 1.06249 FERM and PDZ domain containing 1 /// similar to FERM and PDZ domain containing 1 /// similar to FERM and PDZ domain containing 1 Frmpd1 /// LOC669360 /// LOC674439  
 1435190\_at 0.87520 cell adhesion molecule with homology to L1CAM Chl1  
 1435191\_at 0.74408 corneodesmosin Cdsn  
 1435192\_at 0.95144 similar to SRY (sex determining region Y)-box 3 LOC631901  
 1435193\_at 0.94065 RIKEN cDNA A230050P20 gene A230050P20Rik

1435194\_at 0.82128 --- ---  
1435195\_at 0.89612 vasohibin 1 Vash1  
1435196\_at 0.88108 "neurotrophic tyrosine kinase, receptor, type 2" Ntrk2  
1435197\_at 0.98796 "POU domain, class 3, transcription factor 3" Pou3f3  
1435198\_at 1.05176 hypothetical protein LOC545228 LOC545228  
1435199\_at 0.87570 --- ---  
1435200\_at 1.02317 RIKEN cDNA 6330419J24 gene 6330419J24Rik  
1435201\_at 0.93620 RIKEN cDNA 0610009B10 gene 0610009B10Rik  
1435202\_at 0.93218 zinc finger protein 574 Zfp574  
1435203\_at 1.02148 "mannosidase 2, alpha 2" Man2a2  
1435204\_at 0.99062 protein arginine N-methyltransferase 8 Prmt8  
1435205\_at 0.89096 "transcription factor AP-2, epsilon" Tcfap2e  
1435206\_at 1.05343 "solute carrier family 24 (sodium/potassium/calcium exchanger), member 4"  
Slc24a4  
1435207\_at 0.81317 DIX domain containing 1 Dixdc1  
1435208\_at 1.11243 deltex 3-like (Drosophila) Dtx3l  
1435209\_at 1.01760 cDNA sequence BC057079 BC057079  
1435210\_s\_at 0.97857 syntaphilin Snph  
1435211\_at 1.00516 tetratricopeptide repeat domain 12 /// similar to tetratricopeptide repeat domain  
12 Ttc12 /// LOC640389  
1435212\_at 1.15765 "purinergic receptor P2X, ligand-gated ion channel, 2" P2rx2  
1435213\_at 0.97107 NHL repeat containing 1 Nhlrc1  
1435214\_at 0.95630 gap junction membrane channel protein alpha 12 Gja12  
1435215\_at 0.81755 AP1 gamma subunit binding protein 1 Ap1gbp1  
1435216\_a\_at 1.07900 outer dense fiber of sperm tails 2 Odf2  
1435217\_at 0.92918 hypothetical protein LOC666185 /// hypothetical protein LOC666222 ///  
hypothetical protein LOC673030 LOC666185 /// LOC666222 /// LOC673030  
1435218\_at 0.99149 "RasGEF domain family, member 1A" Rasgef1a  
1435219\_x\_at 0.93895 "beclin 1 (coiled-coil, myosin-like BCL2-interacting protein)" Becn1  
1435220\_s\_at 1.05099 CDC42 small effector 2 Cdc42se2  
1435221\_at 0.89149 "Adult male corpora quadrigemina cDNA, RIKEN full-length enriched library,  
clone:B230341P20 product:inferred: forkhead box P1, full insert sequence" ---  
1435222\_at 0.89175 forkhead box P1 Foxp1  
1435223\_at 0.90155 "SPFH domain family, member 2" Spfh2  
1435224\_at 0.95928 CREB binding protein Crebbp  
1435225\_s\_at 0.91180 "bromodomain and PHD finger containing, 3" Brpf3  
1435226\_at 1.03062 IBR domain containing 3 Ibrdc3  
1435227\_at 1.04090 --- ---  
1435228\_at 0.79101 cDNA sequence BC023829 BC023829  
1435229\_at 0.86850 GRAM domain containing 1B Gramd1b  
1435230\_at 1.12074 ankyrin repeat domain 12 Ankrd12  
1435231\_at 1.03791 coenzyme Q4 homolog (yeast) Coq4  
1435232\_x\_at 0.97269 --- ---

|              |         |                                                                                                                            |               |
|--------------|---------|----------------------------------------------------------------------------------------------------------------------------|---------------|
| 1435233_at   | 0.90051 | nuclear receptor coactivator 2                                                                                             | Ncoa2         |
| 1435234_at   | 0.97915 | nuclear receptor coactivator 2                                                                                             | Ncoa2         |
| 1435235_at   | 0.93134 | thioredoxin-like 1                                                                                                         | Txn1l         |
| 1435236_at   | 0.92492 | RIKEN cDNA A630018P17 gene                                                                                                 | A630018P17Rik |
| 1435237_at   | 0.98149 | RIKEN cDNA 2310009A05 gene                                                                                                 | 2310009A05Rik |
| 1435238_x_at | 1.04188 | RIKEN cDNA 2310009A05 gene                                                                                                 | 2310009A05Rik |
| 1435239_at   | 1.02235 | "glutamate receptor, ionotropic, AMPA1 (alpha 1)"                                                                          | Gria1         |
| 1435240_at   | 0.81809 | "bromodomain adjacent to zinc finger domain, 2B"                                                                           | Baz2b         |
| 1435241_at   | 1.00430 | RIKEN cDNA D930036F22 gene                                                                                                 | D930036F22Rik |
| 1435242_at   | 0.87237 | androgen-induced proliferation inhibitor                                                                                   | Aprin         |
| 1435243_at   | 0.92459 | zinc finger protein 746                                                                                                    | Zfp746        |
| 1435244_at   | 1.01343 | Vav2 oncogene                                                                                                              | Vav2          |
| 1435245_at   | 0.86740 | "glutaminase 2 (liver, mitochondrial)"                                                                                     | Gls2          |
| 1435246_at   | 0.89044 | progesterin and adipoQ receptor family member VIII                                                                         | Paqr8         |
| 1435247_at   | 0.84566 | ubiquitin-activating enzyme E1-domain containing 1                                                                         | Ube1dc1       |
| 1435248_a_at | 1.07810 | "BTAF1 RNA polymerase II, B-TFIID transcription factor-associated, (Mot1 homolog, S. cerevisiae)"                          | Btaf1         |
| 1435249_at   | 1.03506 | "BTAF1 RNA polymerase II, B-TFIID transcription factor-associated, (Mot1 homolog, S. cerevisiae)"                          | Btaf1         |
| 1435250_at   | 1.01771 | integrator complex subunit 8                                                                                               | Ints8         |
| 1435251_at   | 0.93586 | sorting nexin 13                                                                                                           | Snx13         |
| 1435252_at   | 1.04406 | "UDP-Gal:betaGal beta 1,3-galactosyltransferase, polypeptide 6"                                                            | B3galt6       |
| 1435253_at   | 1.18227 | "RAB11B, member RAS oncogene family"                                                                                       | Rab11b        |
| 1435254_at   | 0.81371 | plexin B1                                                                                                                  | Plxnb1        |
| 1435255_at   | 0.91124 | plexin B1                                                                                                                  | Plxnb1        |
| 1435256_at   | 0.96981 | RIKEN cDNA 1500005P14 gene                                                                                                 | 1500005P14Rik |
| 1435257_at   | 0.78136 | kelch-like 17 (Drosophila)                                                                                                 | Klh17         |
| 1435258_at   | 0.96777 | transmembrane protein 141                                                                                                  | Tmem141       |
| 1435259_s_at | 1.04082 | transmembrane protein 141                                                                                                  | Tmem141       |
| 1435260_at   | 0.91133 | ---                                                                                                                        | ---           |
| 1435261_at   | 1.08407 | RIKEN cDNA 4732416N19 gene                                                                                                 | 4732416N19Rik |
| 1435262_at   | 0.93491 | Transcribed locus                                                                                                          | ---           |
| 1435263_at   | 0.96765 | transmembrane protein 106A                                                                                                 | Tmem106a      |
| 1435264_at   | 1.04530 | elastin microfibril interfacier 2                                                                                          | Emilin2       |
| 1435265_at   | 0.80264 | "Adult male cecum cDNA, RIKEN full-length enriched library, clone:9130204C03 product:unclassifiable, full insert sequence" | ---           |
| 1435266_at   | 0.84512 | RIKEN cDNA A930041I02 gene                                                                                                 | A930041I02Rik |
| 1435267_at   | 1.96562 | RIKEN cDNA A430108E01 gene                                                                                                 | A430108E01Rik |
| 1435268_at   | 0.99886 | "guanine nucleotide binding protein, alpha z subunit"                                                                      | Gnaz          |
| 1435269_at   | 1.18767 | RIKEN cDNA 2510005D08 gene                                                                                                 | 2510005D08Rik |
| 1435270_x_at | 1.03686 | RIKEN cDNA 2510005D08 gene                                                                                                 | 2510005D08Rik |
| 1435271_at   | 0.99235 | interferon regulatory factor 3                                                                                             | Irf3          |
| 1435272_at   | 0.84036 | "inositol 1,4,5-trisphosphate 3-kinase B"                                                                                  | Itpkb         |

1435273\_at 0.96973 tryptophanyl tRNA synthetase 2 (mitochondrial) Wars2  
1435274\_at 0.97610 RIKEN cDNA 4921517N04 gene 4921517N04Rik  
1435275\_at 1.05239 cytochrome c oxidase subunit VIb polypeptide 2 Cox6b2  
1435276\_a\_at 0.86665 DiGeorge syndrome critical region gene 2 Dgcr2  
1435277\_x\_at 1.06626 "expressed in non-metastatic cells 1, protein" Nme1  
1435278\_at 0.75480 SFT2 domain containing 3 Sft2d3  
1435279\_at 0.89819 cDNA sequence BC059842 BC059842  
1435280\_at 0.83035 expressed sequence AI452195 AI452195  
1435281\_at 0.92561 carnitine palmitoyltransferase 1c Cpt1c  
1435282\_at 0.79631 "gene model 967, (NCBI)" Gm967  
1435283\_s\_at 0.71452 "gene model 967, (NCBI)" Gm967  
1435284\_at 2.05182 reticulon 4 Rtn4  
1435285\_at 0.84331 metallophosphoesterase domain containing 2 Mpped2  
1435286\_at 1.13525 expressed sequence AW125296 AW125296  
1435287\_at 1.13983 adducin 2 (beta) Add2  
1435288\_at 1.02625 "coronin, actin binding protein 1A" Coro1a  
1435289\_at 0.88600 RIKEN cDNA D230014K01 gene D230014K01Rik  
1435290\_x\_at 0.82325 "histocompatibility 2, class II antigen A, alpha" H2-Aa  
1435291\_at 0.92119 LEM domain containing 3 Lemd3  
1435292\_at 0.78022 "TBC1 domain family, member 4" Tbc1d4  
1435293\_at 1.11174 RIKEN cDNA 2900022I03 gene 2900022I03Rik  
1435294\_at 0.95164 myotubularin related protein 11 Mtmr11  
1435295\_at 0.88251 dopey family member 1 Dopey1  
1435296\_at 1.02360 "adrenergic receptor, alpha 2c" Adra2c  
1435297\_at 0.81722 gap junction membrane channel protein alpha 9 Gja9  
1435298\_at 1.06742 component of oligomeric golgi complex 5 Cog5  
1435299\_at 0.86363 hypothetical protein C230069N13 C230069N13  
1435300\_at 0.94575 --- ---  
1435301\_at 0.94476 RIKEN cDNA 1110004E09 gene 1110004E09Rik  
1435302\_at 1.11507 "TAF4B RNA polymerase II, TATA box binding protein (TBP)-associated factor" Taf4b  
1435303\_at 1.25150 "TAF4B RNA polymerase II, TATA box binding protein (TBP)-associated factor" Taf4b  
1435304\_at 0.91703 "superoxide dismutase 1, soluble" Sod1  
1435305\_at 0.92824 "neurotrophic tyrosine kinase, receptor, type 2" Ntrk2  
1435306\_a\_at 1.02339 kinesin family member 11 Kif11  
1435307\_at 0.98028 RIKEN cDNA 6430502M16 gene 6430502M16Rik  
1435308\_at 1.01398 fucosyltransferase 9 Fut9  
1435309\_at 0.99542 cDNA sequence BC019943 BC019943  
1435310\_at 1.09986 F-box only protein 7 Fbxo7  
1435311\_s\_at 0.91370 F-box only protein 7 Fbxo7  
1435312\_at 0.87830 Progesterin and adipoQ receptor family member VII Paqr7  
1435313\_at 1.13409 Cd200 receptor 4 Cd200r4



1435314\_at 0.96886 tryptophan hydroxylase 2 Tph2  
1435315\_s\_at 0.94750 RIKEN cDNA 2900034E22 gene 2900034E22Rik  
1435316\_at 1.08374 "Proteasome (prosome, macropain) subunit, alpha type 6" Psma6  
1435317\_x\_at 1.11777 "proteasome (prosome, macropain) subunit, alpha type 6" Psma6  
1435318\_at 0.96556 RIKEN cDNA E130218I03 gene E130218I03Rik  
1435319\_at 0.83869 inositol hexaphosphate kinase 2 Ihpk2  
1435320\_at 0.99386 "CTD (carboxy-terminal domain, RNA polymerase II, polypeptide A) small phosphatase like 2" Ctdspl2  
1435321\_at 0.82616 RIKEN cDNA 3732412D22 gene 3732412D22Rik  
1435322\_at 0.89824 RIKEN cDNA 1110011C06 gene 1110011C06Rik  
1435323\_a\_at 1.03047 membrane bound O-acyltransferase domain containing 1 Mboat1  
1435324\_x\_at 0.98510 high mobility group box 1 Hmgb1  
1435325\_at 0.80544 ubiquitin specific peptidase 46 Usp46  
1435326\_at 0.81865 expressed sequence AW112037 AW112037  
1435327\_at 0.85200 expressed sequence AW112037 AW112037  
1435328\_at 0.92115 cysteine and histidine rich 1 Cyhr1  
1435329\_at 1.02219 F-box and leucine-rich repeat protein 11 Fbx11  
1435330\_at 0.88482 --- ---  
1435331\_at 0.92551 expressed sequence AI447904 AI447904  
1435332\_at 0.91094 5-hydroxytryptamine (serotonin) receptor 7 Htr7  
1435333\_at 0.94961 RIKEN cDNA 1110007M04 gene 1110007M04Rik  
1435334\_at 0.95967 tetratricopeptide repeat domain 7 Ttc7  
1435335\_a\_at 0.98931 "N-acetylglucosamine-1-phosphate transferase, alpha and beta subunits" Gnptab  
1435336\_at 0.69867 cadherin EGF LAG seven-pass G-type receptor 2 Celsr2  
1435337\_at 1.04035 teashirt zinc finger family member 3 Tshz3  
1435338\_at 1.08713 cyclin-dependent kinase 6 Cdk6  
1435339\_at 0.88105 potassium channel tetramerisation domain containing 15 Kctd15  
1435340\_at 0.98769 jumonji domain containing 2A Jmjd2a  
1435341\_at 1.00586 peptidyl-prolyl isomerase G (cyclophilin G) Ppig  
1435342\_at 1.00474 "potassium inwardly-rectifying channel, subfamily K, member 6" Kcnk6  
1435343\_at 1.00868 dedicator of cytokinesis 10 /// similar to Dedicator of cytokinesis protein 10 (Protein zizimin 3) Dock10 /// LOC630691  
1435344\_at 0.90014 transcription factor Dp 2 Tfdp2  
1435345\_at 0.78392 cerebral endothelial cell adhesion molecule 1 Ceecam1  
1435346\_at 1.25776 coiled-coil domain containing 82 Ccdc82  
1435347\_at 1.04883 staufen (RNA binding protein) homolog 1 (Drosophila) Stau1  
1435348\_at 0.83449 RIKEN cDNA D930009K15 gene D930009K15Rik  
1435349\_at 1.54407 neuropilin 2 Nrp2  
1435350\_at 0.93218 Tnf receptor-associated factor 6 Traf6  
1435351\_at 1.02589 RIKEN cDNA 2310026E23 gene 2310026E23Rik  
1435352\_at 0.97796 "phosphatidylinositol glycan anchor biosynthesis, class K" Pigk  
1435353\_a\_at 0.82102 RIKEN cDNA 4933439C20 gene 4933439C20Rik

1435354\_at 0.94711 "potassium inwardly-rectifying channel, subfamily J, member 15" Kcnj15  
1435355\_at 1.03737 nebulin Neb  
1435356\_at 1.02801 F-box protein 42 Fbxo42  
1435357\_at 0.86068 --- ---  
1435358\_at 1.00943 CUE domain containing 1 Cuedc1  
1435359\_at 1.06283 cDNA sequence BC060632 BC060632  
1435360\_at 0.99905 zinc finger protein 651 Zfp651  
1435361\_at 1.00712 --- ---  
1435362\_at 1.12851 forkhead box J3 Foxj3  
1435363\_at 0.75311 "pleckstrin homology domain containing, family G (with RhoGef domain) member 1" Plekhg1  
1435364\_at 1.03325 cysteine and histidine rich 1 Cyhr1  
1435365\_at 0.97794 RIKEN cDNA 4732415M23 gene 4732415M23Rik  
1435366\_at 0.92018 RIKEN cDNA D430042O09 gene D430042O09Rik  
1435367\_at 0.90655 mitogen-activated protein kinase 4 Mapk4  
1435368\_a\_at 0.93443 "poly (ADP-ribose) polymerase family, member 1" Parp1  
1435369\_at 1.00480 FAST kinase domains 5 Fastkd5  
1435370\_a\_at 0.92760 carboxylesterase 3 Ces3  
1435371\_x\_at 1.01614 carboxylesterase 3 Ces3  
1435372\_a\_at 1.15081 proliferation-associated 2G4 Pa2g4  
1435373\_at 0.87812 "casein kinase 1, epsilon" Csnk1e  
1435374\_at 0.89567 Transcribed locus ---  
1435375\_at 0.85197 cDNA sequence BC052328 BC052328  
1435376\_at 1.09631 DDHD domain containing 2 Ddhd2  
1435377\_at 1.01452 --- ---  
1435378\_at 1.06142 RIKEN cDNA 2210020M01 gene 2210020M01Rik  
1435379\_at 1.07369 cDNA sequence AK122209 AK122209  
1435380\_at 1.01428 "COX10 homolog, cytochrome c oxidase assembly protein, heme A: farnesyltransferase (yeast)" Cox10  
1435381\_at 1.29196 RIKEN cDNA 2610110G12 gene 2610110G12Rik  
1435382\_at 1.00153 necdin Ndn  
1435383\_x\_at 0.90631 necdin Ndn  
1435384\_at 0.78761 ubiquitin-conjugating enzyme E2N Ube2n  
1435385\_at 0.90852 teashirt zinc finger family member 2 Tshz2  
1435386\_at 0.99318 Von Willebrand factor homolog Vwf  
1435387\_at 0.90525 "solute carrier family 2 (facilitated glucose transporter), member 13" Slc2a13  
1435388\_at 1.09829 NADPH dependent diflavin oxidoreductase 1 Ndor1  
1435389\_at 1.01762 RALBP1 associated Eps domain containing protein 2 Reps2  
1435390\_at 1.04716 exonuclease domain containing 1 Exod1  
1435391\_at 1.16583 RIKEN cDNA 3200001K10 gene 3200001K10Rik  
1435392\_at 1.04925 WD repeat domain 17 Wdr17  
1435393\_at 0.98500 "CDNA, clone:Y0G0149N04, strand:unspecified" ---  
1435394\_s\_at 0.94674 "ras homolog gene family, member C" Rhoc

1435395\_s\_at 0.95113 "ATP synthase, H<sup>+</sup> transporting, mitochondrial F0 complex, subunit f, isoform 2" Atp5j2  
 1435396\_at 0.90010 syntaxin binding protein 6 (amisyn) Stxbp6  
 1435397\_at 0.76332 cDNA sequence BC038156 BC038156  
 1435398\_at 1.03658 syntaxin binding protein 5 (tomosyn) Stxbp5  
 1435399\_at 1.01768 RIKEN cDNA 2310068J10 gene 2310068J10Rik  
 1435400\_at 0.90669 RIKEN cDNA 2900075B16 gene 2900075B16Rik  
 1435401\_at 0.89578 tetratricopeptide repeat domain 26 Ttc26  
 1435402\_at 0.90824 GRAM domain containing 1B Gramd1b  
 1435403\_at 1.05532 RIKEN cDNA 1700007L15 gene 1700007L15Rik  
 1435404\_at 1.06268 dispatched homolog 2 (Drosophila) Disp2  
 1435405\_at 0.98762 SET domain containing 4 Setd4  
 1435406\_at 0.92135 coiled-coil alpha-helical rod protein 1 Cchcr1  
 1435407\_at 0.90400 Zinc finger protein 483 Zfp483  
 1435408\_at 1.19153 RIKEN cDNA 2700092H06 gene 2700092H06Rik  
 1435409\_at 0.93946 Transcribed locus ---  
 1435410\_at 1.00050 testicular cell adhesion molecule 1 Tcam1  
 1435411\_at 1.01649 Transcribed locus ---  
 1435412\_at 0.96068 RIKEN cDNA 1700007E06 gene 1700007E06Rik  
 1435413\_x\_at 1.04034 RIKEN cDNA 2700060E02 gene 2700060E02Rik  
 1435414\_s\_at 0.90078 dynactin 1 Dctn1  
 1435415\_x\_at 0.87779 MARCKS-like 1 Marcksl1  
 1435416\_x\_at 0.94064 "phosphatidylinositol glycan anchor biosynthesis, class Q" Pigq  
 1435417\_at 0.87449 expressed sequence AI464131 AI464131  
 1435418\_at 0.86217 "solute carrier family 22 (organic anion transporter), member 8" Slc22a8  
 1435419\_at 0.91115 retrotransposon gag domain containing 4 Rgag4  
 1435420\_at 0.98805 RIKEN cDNA C330016K18 gene C330016K18Rik  
 1435421\_at 0.97843 fibronectin type 3 and SPRY domain-containing protein Fsd1  
 1435422\_at 0.99581 RIKEN cDNA 4933433P14 gene 4933433P14Rik  
 1435423\_x\_at 1.00430 RIKEN cDNA 4933433P14 gene 4933433P14Rik  
 1435424\_x\_at 0.99567 Transcribed locus ---  
 1435425\_at 0.93735 RIKEN cDNA 4933439C20 gene /// phosphatidylserine decarboxylase 4933439C20Rik /// Pisd  
 1435426\_s\_at 0.75017 RIKEN cDNA 4933439C20 gene /// phosphatidylserine decarboxylase 4933439C20Rik /// Pisd  
 1435427\_x\_at 0.93201 cDNA sequence BC037112 BC037112  
 1435428\_at 0.96055 cDNA sequence BC037112 BC037112  
 1435429\_x\_at 1.04004 ribosomal protein S27-like Rps27l  
 1435430\_at 1.00639 transmembrane protein 1 Tmem1  
 1435431\_at 1.07934 RIKEN cDNA 2310047M15 gene 2310047M15Rik  
 1435432\_at 1.04654 "centaurin, gamma 2" Centg2  
 1435433\_at 1.02872 "centaurin, gamma 2" Centg2  
 1435434\_at 0.99448 Braf transforming gene Braf

1435435\_at 1.00195 cortactin binding protein 2 Ctnbp2  
1435436\_at 0.92856 Endothelial PAS domain protein 1 Epas1  
1435437\_at 0.99829 SET domain containing (lysine methyltransferase) 7 Setd7  
1435438\_at 1.10050 SRY-box containing gene 8 Sox8  
1435439\_at 0.96643 DiGeorge syndrome critical region gene 8 Dgcr8  
1435440\_at 0.96145 PDZ domain containing 8 Pdzd8  
1435441\_at 0.96751 actin-binding LIM protein 2 Ablim2  
1435442\_at 1.10038 WD repeats and SOF domain containing 1 Wdsof1  
1435443\_at 1.00410 eyes absent 3 homolog (Drosophila) Eya3  
1435444\_at 1.03020 activating transcription factor 6 Atf6  
1435445\_at 0.94085 cyclin T2 Ccnt2  
1435446\_a\_at 0.90934 choline phosphotransferase 1 Chpt1  
1435447\_at 1.12769 major intrinsic protein of eye lens fiber Mip  
1435448\_at 0.80807 BCL2-like 11 (apoptosis facilitator) Bcl2l11  
1435449\_at 0.78903 BCL2-like 11 (apoptosis facilitator) Bcl2l11  
1435450\_at 1.01388 copine III Cpne3  
1435451\_at 1.08002 "helicase, mus308-like (Drosophila)" Hel308  
1435452\_at 1.34291 transmembrane protein 20 Tmem20  
1435453\_at 0.95074 RIKEN cDNA A930011O12 gene A930011O12Rik  
1435454\_a\_at 1.06474 cDNA sequence BC006779 BC006779  
1435455\_at 1.13257 expressed sequence C79267 C79267  
1435456\_at 0.80521 tetratricopeptide repeat domain 28 Ttc28  
1435457\_at 0.99413 PDZ domain containing 4 Pdzd4  
1435458\_at 1.14118 proviral integration site 1 Pim1  
1435459\_at 0.90720 flavin containing monooxygenase 2 Fmo2  
1435460\_at 1.84324 "protein kinase, cGMP-dependent, type II" Prkg2  
1435461\_at 0.86729 "membrane associated guanylate kinase, WW and PDZ domain containing 3"  
Magi3  
1435462\_at 1.07261 hypothetical LOC433022 LOC433022  
1435463\_s\_at 1.02715 myosin ID Myo1d  
1435464\_at 0.95891 RIKEN cDNA 1110003E01 gene 1110003E01Rik  
1435465\_at 0.93193 kelch repeat and BTB (POZ) domain containing 11 /// similar to Protein  
KIAA0711 Kbtbd11 /// LOC632344  
1435466\_at 0.89609 RIKEN cDNA A830091I15 gene A830091I15Rik  
1435467\_at 1.11608 "FYVE, RhoGEF and PH domain containing 6" Fgd6  
1435468\_at 1.00822 expressed sequence C76566 C76566  
1435469\_at 1.05669 quiescin Q6-like 1 Qscn6l1  
1435470\_at 0.93016 similar to p47 protein isoform a LOC547150  
1435471\_at 0.88204 zinc finger protein 708 Zfp708  
1435472\_at 1.03521 kringle containing transmembrane protein 1 Kremen1  
1435473\_at 0.83136 "gene model 347, (NCBI)" Gm347  
1435474\_at 0.94431 "TAF5 RNA polymerase II, TATA box binding protein (TBP)-associated  
factor" Taf5

|              |         |                                                                                                                                                                                         |                                           |
|--------------|---------|-----------------------------------------------------------------------------------------------------------------------------------------------------------------------------------------|-------------------------------------------|
| 1435475_at   | 0.87439 | "lectin, mannose-binding 2-like"                                                                                                                                                        | Lman2l                                    |
| 1435476_a_at | 0.93750 | "Fc receptor, IgG, low affinity IIb"                                                                                                                                                    | Fcgr2b                                    |
| 1435477_s_at | 0.88574 | "Fc receptor, IgG, low affinity IIb"                                                                                                                                                    | Fcgr2b                                    |
| 1435478_at   | 0.95358 | WD repeat domain 26                                                                                                                                                                     | Wdr26                                     |
| 1435479_at   | 0.92787 | ---                                                                                                                                                                                     | ---                                       |
| 1435480_at   | 0.98231 | Braf transforming gene                                                                                                                                                                  | Braf                                      |
| 1435481_at   | 0.98208 | zinc finger protein 653                                                                                                                                                                 | Zfp653                                    |
| 1435482_at   | 1.10654 | fibrinogen C domain containing 1                                                                                                                                                        | Fibcd1                                    |
| 1435483_x_at | 0.84078 | "solute carrier family 25, member 32"                                                                                                                                                   | Slc25a32                                  |
| 1435484_at   | 1.11534 | expressed sequence BF642829                                                                                                                                                             | BF642829                                  |
| 1435485_at   | 0.96020 | RIKEN cDNA C230096C10 gene                                                                                                                                                              | C230096C10Rik                             |
| 1435486_at   | 1.18755 | ---                                                                                                                                                                                     | ---                                       |
| 1435487_at   | 1.01808 | "glutamate receptor, ionotropic, delta 2"                                                                                                                                               | Grid2                                     |
| 1435488_at   | 0.99374 | RIKEN cDNA C630010D07 gene /// similar to methylenetetrahydrofolate dehydrogenase (NADP+ dependent) 2-like /// region containing RIKEN cDNA C630010D07 gene; RIKEN cDNA 1110019K23 gene | C630010D07Rik /// LOC665563 /// LOC674367 |
| 1435489_at   | 0.75452 | hypothetical LOC552912                                                                                                                                                                  | LOC552912                                 |
| 1435490_at   | 0.99894 | hexokinase 3                                                                                                                                                                            | Hk3                                       |
| 1435491_at   | 0.88700 | RIKEN cDNA 9830167H18 gene                                                                                                                                                              | 9830167H18Rik                             |
| 1435492_at   | 1.05132 | suppressor of cytokine signaling 6                                                                                                                                                      | Socs6                                     |
| 1435493_at   | 0.91975 | desmoplakin                                                                                                                                                                             | Dsp                                       |
| 1435494_s_at | 0.86367 | desmoplakin                                                                                                                                                                             | Dsp                                       |
| 1435495_at   | 0.85434 | adenosine A1 receptor                                                                                                                                                                   | Adora1                                    |
| 1435496_at   | 1.09177 | RIKEN cDNA 5730469M10 gene                                                                                                                                                              | 5730469M10Rik                             |
| 1435497_at   | 1.06344 | RIKEN cDNA 5730590G19 gene                                                                                                                                                              | 5730590G19Rik                             |
| 1435498_at   | 0.79980 | ADP-ribosylation factor interacting protein 2                                                                                                                                           | Arfip2                                    |
| 1435499_at   | 0.91445 | RIKEN cDNA D030041N04 gene                                                                                                                                                              | D030041N04Rik                             |
| 1435500_at   | 0.88647 | "RAB26, member RAS oncogene family"                                                                                                                                                     | Rab26                                     |
| 1435501_at   | 0.92674 | RIKEN cDNA C030004M05 gene                                                                                                                                                              | C030004M05Rik                             |
| 1435502_a_at | 1.22449 | "bromodomain, testis-specific"                                                                                                                                                          | Brdt                                      |
| 1435503_at   | 1.06700 | KIAA0415 protein                                                                                                                                                                        | KIAA0415                                  |
| 1435504_at   | 1.05757 | Transcribed locus                                                                                                                                                                       | ---                                       |
| 1435505_at   | 0.93304 | dystrophia myotonica-containing WD repeat motif                                                                                                                                         | Dmwd                                      |
| 1435506_at   | 0.83905 | ---                                                                                                                                                                                     | ---                                       |
| 1435507_x_at | 1.03659 | "protease, serine, 2"                                                                                                                                                                   | Prss2                                     |
| 1435508_x_at | 1.04518 | RIKEN cDNA 0610009D07 gene                                                                                                                                                              | 0610009D07Rik                             |
| 1435509_x_at | 0.91770 | CDK2 (cyclin-dependent kinase 2)-associated protein 1                                                                                                                                   | Cdk2ap1                                   |
| 1435510_at   | 1.28007 | protein phosphatase 1H (PP2C domain containing)                                                                                                                                         | Ppm1h                                     |
| 1435511_at   | 1.03921 | synapsin II                                                                                                                                                                             | Syn2                                      |
| 1435512_at   | 0.95306 | expressed sequence AI836003                                                                                                                                                             | AI836003                                  |
| 1435513_at   | 0.91819 | 5-hydroxytryptamine (serotonin) receptor 2C                                                                                                                                             | Htr2c                                     |
| 1435514_at   | 0.94278 | leucine zipper transcription factor-like 1                                                                                                                                              | Lztfl1                                    |
| 1435515_at   | 0.90623 | Transcribed locus                                                                                                                                                                       | ---                                       |

1435516\_x\_at 1.00172 regulator of telomere elongation helicase 1 Rtel1  
1435517\_x\_at 0.87737 v-ral simian leukemia viral oncogene homolog B (ras related) Ralb  
1435518\_at 0.96662 RAS related protein 1b Rap1b  
1435519\_at 0.96850 RAS related protein 1b Rap1b  
1435520\_at 0.91840 Musashi homolog 2 (Drosophila) Msi2  
1435521\_at 0.82090 Musashi homolog 2 (Drosophila) Msi2  
1435522\_a\_at 1.01642 RIKEN cDNA 2310016E02 gene 2310016E02Rik  
1435523\_s\_at 0.92547 RIKEN cDNA 2700089E24 gene 2700089E24Rik  
1435524\_at 0.99649 RIKEN cDNA 2010109N14 gene 2010109N14Rik  
1435525\_at 0.80846 potassium channel tetramerisation domain containing 17 Kctd17  
1435526\_at 1.00998 torsin A interacting protein 2 Tor1aip2  
1435527\_at 0.95353 nuclear factor I/C Nfic  
1435528\_at 0.99769 "DNA segment, Chr 2, Brigham & Women's Genetics 1335 expressed"  
D2Bwg1335e  
1435529\_at 0.90084 similar to interferon-induced protein with tetratricopeptide repeats 1 /// similar  
to interferon-induced protein with tetratricopeptide repeats 1 LOC667373 /// LOC669129  
1435530\_at 1.01398 calmodulin regulated spectrin-associated protein 1 Camsap1  
1435531\_at 0.86277 ubiquitin specific peptidase 3 Usp3  
1435532\_at 0.99087 RIKEN cDNA 4933426K21 gene 4933426K21Rik  
1435533\_s\_at 0.99271 RIKEN cDNA 4933426K21 gene 4933426K21Rik  
1435534\_a\_at 1.09853 translocase of outer mitochondrial membrane 20 homolog (yeast) Tomm20  
1435535\_at 1.00335 DEP domain containing 5 Depdc5  
1435536\_at 0.81156 "regulatory solute carrier protein, family 1, member 1" Rsc1a1  
1435537\_at 0.99505 "protein tyrosine phosphatase, receptor type, D" Ptpnd  
1435538\_at 1.10526 RIKEN cDNA 0610030E20 gene 0610030E20Rik  
1435539\_at 0.89660 Huntington disease gene homolog Hdh  
1435540\_at 0.89592 "immunity-related GTPase family, Q" Irgq  
1435541\_at 1.01116 "betacellulin, epidermal growth factor family member" Btc  
1435542\_s\_at 0.92298 CTTNBP2 N-terminal like Ctnnbp2nl  
1435543\_at 0.96875 adenomatosis polyposis coli Apc  
1435544\_at 1.11023 exosome component 6 Exosc6  
1435545\_at 0.80496 cDNA sequence BC032203 BC032203  
1435546\_a\_at 1.10663 RIKEN cDNA 1810013L24 gene 1810013L24Rik  
1435547\_at 0.89971 "17 days embryo heart cDNA, RIKEN full-length enriched library, clone:  
I920018H16 product:hypothetical protein, full insert sequence" ---  
1435548\_at 1.11007 "MRS2-like, magnesium homeostasis factor (S. cerevisiae)" Mrs2l  
1435549\_at 0.82668 "transient receptor potential cation channel, subfamily M, member 4" Trpm4  
1435550\_at 0.91941 RIKEN cDNA C430014K11 gene C430014K11Rik  
1435551\_at 0.86748 formin homology 2 domain containing 3 Fhod3  
1435552\_at 1.00174 OTU domain containing 7B Otud7b  
1435553\_at 1.07779 PDZ domain containing 2 Pdzd2  
1435554\_at 0.71713 transmembrane and coiled coil domains 3 Tmcc3  
1435555\_at 1.11436 --- ---

1435556\_at 0.89128 zinc finger protein 597 Zfp597  
1435557\_at 1.24799 formin homology 2 domain containing 1 Fhod1  
1435558\_at 0.65503 brain-specific angiogenesis inhibitor 2 Bai2  
1435559\_at 0.75728 myosin VI Myo6  
1435560\_at 0.88634 integrin alpha L /// similar to Integrin alpha-L precursor (Leukocyte adhesion glycoprotein LFA-1 alpha chain) (LFA-1A) (Leukocyte function-associated molecule 1 alpha chain) (Lymphocyte antigen Ly-15) (CD11a antigen) Itgal /// LOC671163  
1435561\_at 1.01964 Ets2 repressor factor Erf  
1435562\_at 0.85340 PDZ domain containing 8 Pdzd8  
1435563\_at 0.82394 mitochondrial ribosomal protein S5 Mrps5  
1435564\_at 0.88865 RIKEN cDNA C230078M08 gene C230078M08Rik  
1435565\_at 1.06991 RIKEN cDNA 1500011H22 gene 1500011H22Rik  
1435566\_s\_at 0.95453 v-raf murine sarcoma 3611 viral oncogene homolog Araf  
1435567\_at 1.20333 phosphorylase kinase alpha 1 Phka1  
1435568\_at 0.94975 cDNA sequence AK129128 AK129128  
1435569\_at 1.00740 RIKEN cDNA D630029K05 gene D630029K05Rik  
1435570\_s\_at 1.09040 RIKEN cDNA D630029K05 gene D630029K05Rik  
1435571\_at 0.92674 RIKEN cDNA A530065I17 gene A530065I17Rik  
1435572\_at 0.93421 RIKEN cDNA 2310014L17 gene 2310014L17Rik  
1435573\_at 0.91323 OTU domain containing 5 Otud5  
1435574\_at 1.09481 "Cysteine and histidine-rich domain (CHORD)-containing, zinc-binding protein 1" Chordc1  
1435575\_at 0.88050 kinetochore associated 1 Kntc1  
1435576\_at 1.02615 expressed sequence AW413774 AW413774  
1435577\_at 1.05448 disabled homolog 1 (Drosophila) Dab1  
1435578\_s\_at 1.01745 disabled homolog 1 (Drosophila) Dab1  
1435579\_at 1.11191 "Opioid receptor, sigma 1" Oprs1  
1435580\_at 0.92306 RIKEN cDNA C230081A13 gene C230081A13Rik  
1435581\_at 0.84762 beta-site APP-cleaving enzyme 2 Bace2  
1435582\_at 0.95762 WD repeat and FYVE domain containing 4 Wdfy4  
1435583\_at 1.00922 RIKEN cDNA 9330182L06 gene 9330182L06Rik  
1435584\_at 1.02156 expressed sequence AI662791 AI662791  
1435585\_at 1.00527 transcription elongation factor A (SII)-like 7 Tceal7  
1435586\_at 1.03837 PCI domain containing 2 Pcid2  
1435587\_at 1.12643 PCI domain containing 2 Pcid2  
1435588\_at 0.96347 WD repeat and FYVE domain containing 1 Wdfy1  
1435589\_at 1.12647 coiled-coil domain containing 85B Ccdc85b  
1435590\_at 0.97105 RIKEN cDNA D430047L21 gene D430047L21Rik  
1435591\_at 0.77909 expressed sequence AI426330 AI426330  
1435592\_at 1.03060 eukaryotic translation initiation factor 5B Eif5b  
1435593\_x\_at 1.03605 ribosomal protein S7 Rps7  
1435594\_at 0.76171 ADP-ribosylation factor-like 6 interacting protein 2 Arl6ip2  
1435595\_at 1.27511 RIKEN cDNA 1810011O10 gene 1810011O10Rik

1435596\_at 0.94428 RIKEN cDNA A530088I07 gene A530088I07Rik  
1435597\_at 1.10669 RIKEN cDNA C130052G03 gene C130052G03Rik  
1435598\_at 1.01281 Transcribed locus ---  
1435599\_at 0.92140 cDNA sequence BC020535 BC020535  
1435600\_s\_at 0.94513 cDNA sequence BC020535 BC020535  
1435601\_at 1.24483 expressed sequence AI481772 AI481772  
1435602\_at 0.93115 Transcribed locus ---  
1435603\_at 0.89470 "sushi, nidogen and EGF-like domains 1" Sned1  
1435604\_at 0.95144 tripartite motif protein 37 Trim37  
1435605\_at 0.86675 ARP3 actin-related protein 3 homolog B (yeast) Actr3b  
1435606\_at 1.05956 galactose-3-O-sulfotransferase 4 Gal3st4  
1435607\_at 1.03263 "G protein-coupled receptor, family C, group 1, member B" Grm2  
1435608\_at 0.93107 zinc and ring finger 3 /// similar to Goliath homolog precursor (Ring finger protein 130) (R-goliath) Znrf3 /// LOC631806  
1435609\_at 0.96211 --- ---  
1435610\_at 0.90334 RIKEN cDNA C130034I18 gene C130034I18Rik  
1435611\_x\_at 1.07473 "elastase 3, pancreatic" Ela3  
1435612\_at 1.05291 opioid binding protein/cell adhesion molecule-like Opcml  
1435613\_x\_at 0.94586 "cytochrome c oxidase, subunit Vb" Cox5b  
1435614\_s\_at 0.89164 RAS protein-specific guanine nucleotide-releasing factor 1 Rasgrf1  
1435615\_at 1.01131 zinc finger protein 365 Zfp365  
1435616\_at 0.95616 "cytochrome P450, family 20, subfamily A, polypeptide 1" Cyp20a1  
1435617\_at 0.88704 expressed sequence AI480743 AI480743  
1435618\_at 0.90497 paraneoplastic antigen MA2 Pnma2  
1435619\_at 0.77428 Transcribed locus ---  
1435620\_at 1.07302 RIKEN cDNA 1190002J23 gene 1190002J23Rik  
1435621\_at 0.93319 male sterility domain containing 1 Mlstd1  
1435622\_at 1.02632 heparan sulfate (glucosamine) 3-O-sulfotransferase 3A1 Hs3st3a1  
1435623\_at 0.97532 transmembrane protein 118 Tmem118  
1435624\_at 0.97991 RIKEN cDNA 9030409G11 gene 9030409G11Rik  
1435625\_at 1.01266 ectonucleoside triphosphate diphosphohydrolase 7 Entpd7  
1435626\_a\_at 0.92214 "homocysteine-inducible, endoplasmic reticulum stress-inducible, ubiquitin-like domain member 1" Herpud1  
1435627\_x\_at 0.79848 MARCKS-like 1 /// similar to MARCKS-related protein (MARCKS-like protein 1) (Macrophage myristoylated alanine-rich C kinase substrate) (Mac-MARCKS) (MacMARCKS) (Brain protein F52) Marcks11 /// LOC673071  
1435628\_x\_at 1.25493 RIKEN cDNA 2610305J24 gene /// cDNA sequence BC005512 /// hypothetical protein LOC629242 /// similar to melanoma antigen /// similar to melanoma antigen /// similar to melanoma antigen /// hypothetical ENV polyprotein /// similar to melanoma antigen /// similar to melanoma antigen /// hypothetical protein LOC670270 /// similar to melanoma antigen /// similar to melanoma antigen /// hypothetical protein LOC672969 /// similar to melanoma antigen /// similar to melanoma antigen



2610305J24Rik /// BC005512 /// LOC629242 /// LOC630525 /// LOC631386 /// LOC637482 ///  
 LOC641366 /// LOC668904 /// LOC669885 /// LOC670270 /// LOC672061 /// LOC672939 ///  
 LOC672969 /// LOC673876 /// LOC674927 /// LOC675168 /// LOC675706 /// LOC676247 ///  
 LOC676718 /// LOC677506  
 1435629\_at 0.92135 Transcribed locus ---  
 1435630\_s\_at 1.49157 acetyl-Coenzyme A acetyltransferase 2 Acat2  
 1435631\_x\_at 1.06412 exocyst complex component 6 Exoc6  
 1435632\_at 1.08754 nuclear fragile X mental retardation protein interacting protein 2 Nufip2  
 1435633\_at 1.08702 RIKEN cDNA 4631424J17 gene 4631424J17Rik  
 1435634\_at 0.91746 protein-L-isoaspartate (D-aspartate) O-methyltransferase domain containing 1  
 Pcmt1  
 1435635\_at 0.82016 protein-L-isoaspartate (D-aspartate) O-methyltransferase domain containing 1  
 Pcmt1  
 1435636\_at 1.03071 RIKEN cDNA 2310051F07 gene 2310051F07Rik  
 1435637\_at 0.85970 integrin alpha FG-GAP repeat containing 1 Itfg1  
 1435638\_at 0.87909 glycogen synthase kinase 3 alpha Gsk3a  
 1435639\_at 1.15972 RIKEN cDNA 2610528A11 gene 2610528A11Rik  
 1435640\_x\_at 1.36543 RIKEN cDNA A130040M12 gene A130040M12Rik  
 1435641\_at 0.96714 RIKEN cDNA 9530018I07 gene 9530018I07Rik  
 1435642\_at 0.84763 RIKEN cDNA 9630019K15 gene 9630019K15Rik  
 1435643\_x\_at 0.97458 "ubiquitin B /// gene model 1821, (NCBI)" Ubb /// Gm1821  
 1435644\_at 0.90127 SH3 and PX domains 2B Sh3pxd2b  
 1435645\_at 0.89116 monocyte to macrophage differentiation-associated /// similar to monocyte to  
 macrophage differentiation-associated Mmd /// LOC676546  
 1435646\_at 0.90898 inhibitor of kappaB kinase gamma Ikbkg  
 1435647\_at 0.88390 inhibitor of kappaB kinase gamma Ikbkg  
 1435648\_at 1.02534 RIKEN cDNA B430119L13 gene B430119L13Rik  
 1435649\_at 0.58376 nexilin Nexn  
 1435650\_at 0.87184 hyaluronan and proteoglycan link protein 4 Hapln4  
 1435651\_a\_at 0.95207 "SWI/SNF-related, matrix-associated actin-dependent regulator of chromatin,  
 subfamily a, containing DEAD/H box 1`" Smarcd1  
 1435652\_a\_at 0.91379 "guanine nucleotide binding protein, alpha inhibiting 2" Gnai2  
 1435653\_at 0.95341 "Adult male liver tumor cDNA, RIKEN full-length enriched library, clone:  
 C730024P13 product:unclassifiable, full insert sequence" ---  
 1435654\_at 0.94567 RIKEN cDNA G630039H03 gene G630039H03Rik  
 1435655\_at 1.34479 "small nucleolar RNA, H/ACA box 65" Snora65  
 1435656\_at 0.88486 guanine monphosphate synthetase Gmps  
 1435657\_at 0.96434 expressed sequence AI425999 AI425999  
 1435658\_at 0.91989 "solute carrier family 27 (fatty acid transporter), member 1" Slc27a1  
 1435659\_a\_at 1.17264 triosephosphate isomerase 1 Tpi1  
 1435660\_at 1.11110 RIKEN cDNA C130026I21 gene /// RIKEN cDNA A530032D15Rik gene ///  
 similar to SP140 nuclear body protein (predicted) C130026I21Rik /// A530032D15Rik ///  
 LOC620078

1435661\_at 0.87109 "amyotrophic lateral sclerosis 2 (juvenile) chromosome region, candidate 4"  
Als2cr4

1435662\_at 0.93465 RIKEN cDNA 2610020O08 gene 2610020O08Rik

1435663\_at 0.96531 estrogen receptor 1 (alpha) Esr1

1435664\_at 1.10400 zinc finger protein 397 Zfp397

1435665\_at 0.98105 expressed sequence AI451617 AI451617

1435666\_at 1.00389 microtubule associated serine/threonine kinase 3 Mast3

1435667\_at 1.08058 regulating synaptic membrane exocytosis 1 Rims1

1435668\_at 0.96486 RIKEN cDNA 4932442K08 gene 4932442K08Rik

1435669\_at 0.86789 zinc finger protein 532 Zfp532

1435670\_at 0.80952 transcription factor AP-2 beta Tcfap2b

1435671\_at 0.96129 mirror-image polydactyly gene 1 homolog (human) Mipol1

1435672\_at 0.85731 hypothetical protein 3830612M24 3830612M24

1435673\_at 1.01565 expressed sequence AI448005 AI448005

1435674\_at 0.98454 Rho-related BTB domain containing 2 Rhobtb2

1435675\_at 0.96269 "TBC1D12: TBC1 domain family, member 12" Tbc1d12

1435676\_at 0.97109 centrosomal protein 164 Cep164

1435677\_at 0.97329 expressed sequence C85492 C85492

1435678\_at 0.96114 RIKEN cDNA 2610017I09 gene 2610017I09Rik

1435679\_at 1.02300 optineurin Optn

1435680\_a\_at 1.03884 dipeptidylpeptidase 7 Dpp7

1435681\_s\_at 0.88187 DEAD (Asp-Glu-Ala-Asp) box polypeptide 49 Ddx49

1435682\_at 0.89933 "leucyl-tRNA synthetase, mitochondrial" Lars2

1435683\_a\_at 0.96961 "ATP-binding cassette, sub-family C (CFTR/MRP), member 5" Abcc5

1435684\_at 0.89615 "ATP-binding cassette, sub-family C (CFTR/MRP), member 5" Abcc5

1435685\_x\_at 1.05402 "ATP-binding cassette, sub-family C (CFTR/MRP), member 5" Abcc5

1435686\_at 0.81985 expressed sequence AA536717 AA536717

1435687\_at 0.98289 synaptic vesicle glycoprotein 2 b Sv2b

1435688\_at 0.75152 Chromodomain helicase DNA binding protein 9 Chd9

1435689\_at 1.01707 RIKEN cDNA 9030025P20 gene 9030025P20Rik

1435690\_at 1.15758 RIKEN cDNA 2310008H09 gene 2310008H09Rik

1435691\_at 0.92796 RIKEN cDNA C630028N24 gene C630028N24Rik

1435692\_at 1.06326 "similar to retinoic acid, EGF, and NGF upregulated" LOC622320

1435693\_at 0.87041 "mal, T-cell differentiation protein-like" Mall

1435694\_at 1.01799 Rho GTPase activating protein 26 Arhgap26

1435695\_a\_at 1.28633 RIKEN cDNA A030007L17 gene A030007L17Rik

1435696\_s\_at 0.88717 RIKEN cDNA 3110031B13 gene 3110031B13Rik

1435697\_a\_at 0.77238 "pleckstrin homology, Sec7 and coiled-coil domains, binding protein" Pscdbp

1435698\_at 1.11601 RIKEN cDNA 4921505C17 gene 4921505C17Rik

1435699\_at 0.94705 protein phosphatase 1 (formerly 2C)-like Ppm1l

1435700\_at 0.83715 talin 2 Tln2

1435701\_at 1.04140 "DnaJ (Hsp40) homolog, subfamily B, member 6" Dnajb6

1435702\_s\_at 0.91348 "tyrosine 3-monooxygenase/tryptophan 5-monooxygenase activation protein,

epsilon polypeptide" Ywhae

1435703\_at 0.99487 Transcribed locus ---  
 1435704\_at 0.97611 RIKEN cDNA C920006O11 gene C920006O11Rik  
 1435705\_at 0.97408 similar to hypothetical protein FLJ12895 LOC232875  
 1435706\_at 0.79351 BTB (POZ) domain containing 9 Btbd9  
 1435707\_at 1.12235 asparaginyl-tRNA synthetase 2 (mitochondrial)(putative) Nars2  
 1435708\_at 1.54128 Glutaminase Gls  
 1435709\_at 1.12013 "signal sequence receptor, delta" Ssr4  
 1435710\_at 0.92941 expressed sequence AI661384 AI661384  
 1435711\_at 0.89155 --- ---  
 1435712\_a\_at 1.03179 ribosomal protein S18 Rps18  
 1435713\_at 1.01852 methyltransferase like 2 Mettl2  
 1435714\_x\_at 1.10315 interleukin 17D Il17d  
 1435715\_x\_at 1.03112 thymine DNA glycosylase /// similar to thymine DNA glycosylase isoform 2 ///  
 similar to G/T mismatch-specific thymine DNA glycosylase (C-JUN leucine zipper interactive protein  
 JZA-3) /// similar to thymine DNA glycosylase isoform 2 /// similar to G/T mismatch-specific thymine  
 DNA glycosylase (C-JUN leucine zipper interactive protein JZA-3) Tdg /// LOC545124 ///  
 LOC624784 /// LOC670176 /// LOC672659  
 1435716\_x\_at 1.07048 small nuclear ribonucleoprotein N Snrpn  
 1435717\_at 1.04875 RIKEN cDNA 4833428C12 gene 4833428C12Rik  
 1435718\_at 0.90228 "adaptor-related protein complex 3, sigma 2 subunit" Ap3s2  
 1435719\_at 0.90329 expressed sequence AI448984 AI448984  
 1435720\_at 0.89292 "potassium voltage-gated channel, Shal-related family, member 3" Kcnd3  
 1435721\_at 1.00106 "potassium voltage-gated channel, subfamily Q, member 4" Kcnq4  
 1435722\_at 1.02663 "glutamate receptor, ionotropic, AMPA4 (alpha 4)" Gria4  
 1435723\_at 0.91521 hypothetical protein A530089L17 A530089L17  
 1435724\_at 1.11730 RIKEN cDNA 4933400N17 gene 4933400N17Rik  
 1435725\_x\_at 1.06823 similar to 60S ribosomal protein L12 /// ribosomal protein L12 /// similar to  
 60S ribosomal protein L12 /// similar to 60S ribosomal protein L12 /// similar to 60S ribosomal protein  
 L12 /// similar to 60S ribosomal protein L12 /// similar to 60S ribosomal protein L12 /// similar to 60S  
 ribosomal protein L12 /// similar to 60S ribosomal protein L12 /// similar to 60S ribosomal protein  
 L12 /// similar to 60S ribosomal protein L12 /// similar to 60S ribosomal protein  
 L12 /// similar to 60S ribosomal protein L12 /// similar to 60S ribosomal protein  
 L12 /// similar to 60S ribosomal protein L12 LOC241053 /// Rpl12 /// LOC546695 /// LOC622589 ///  
 LOC630855 /// LOC633363 /// LOC633570 /// LOC639471 /// LOC639477 /// LOC668706 ///  
 LOC668844 /// LOC671640 /// LOC672158 /// LOC672173 /// LOC672854 /// LOC676326  
 1435726\_at 1.08172 LIM domain and actin binding 1 Lima1  
 1435727\_s\_at 0.98656 LIM domain and actin binding 1 Lima1  
 1435728\_at 0.99063 tRNA-yW synthesizing protein 3 homolog (S. cerevisiae) Tyw3  
 1435729\_at 1.02174 mitogen activated protein binding protein interacting protein Mapbpip  
 1435730\_at 0.77209 RIKEN cDNA D930026N18 gene D930026N18Rik  
 1435731\_x\_at 0.90384 Stromal antigen 1 Stag1  
 1435732\_x\_at 1.05440 "ATPase, H+ transporting, lysosomal V0 subunit C" Atp6v0c

1435733\_x\_at 0.97153 RIKEN cDNA 1500026D16 gene 1500026D16Rik  
1435734\_x\_at 1.03776 dihydrouridine synthase 1-like (*S. cerevisiae*) Dus11  
1435735\_x\_at 0.85700 histocompatibility 47 H47  
1435736\_x\_at 0.96551 "RAB, member of RAS oncogene family-like 4" Rabl4  
1435737\_a\_at 0.96629 nuclear distribution gene E homolog 1 (*A nidulans*) Nde1  
1435738\_x\_at 0.97993 small EDRK-rich factor 2 Serf2  
1435739\_at 1.02071 expressed sequence AW208599 AW208599  
1435740\_at 0.79991 Retinoic acid induced 17 Rai17  
1435741\_at 1.06366 phosphodiesterase 8B Pde8b  
1435742\_at 1.01080 RIKEN cDNA 1110034C04 gene 1110034C04Rik  
1435743\_at 0.97390 kelch-like 23 (*Drosophila*) Khl23  
1435744\_at 0.97620 RIKEN cDNA 6720401G13 gene 6720401G13Rik  
1435745\_at 0.74571 RIKEN cDNA 5031439G07 gene 5031439G07Rik  
1435746\_at 1.08855 serine/arginine-rich protein specific kinase 2 Srpk2  
1435747\_at 0.96989 fibroblast growth factor 14 Fgf14  
1435748\_at 1.09342 guanine deaminase Gda  
1435749\_at 1.00207 guanine deaminase Gda  
1435750\_at 1.34841 GTP cyclohydrolase I feedback regulator Gchfr  
1435751\_at 1.08836 "ATP-binding cassette, sub-family C (CFTR/MRP), member 9" Abcc9  
1435752\_s\_at 0.86692 "ATP-binding cassette, sub-family C (CFTR/MRP), member 9" Abcc9  
1435753\_a\_at 1.02855 nuclear casein kinase and cyclin-dependent kinase substrate 1 Nucks1  
1435754\_at 0.96078 RIKEN cDNA 2810482G21 gene 2810482G21Rik  
1435755\_at 0.95902 RIKEN cDNA 1110001A16 gene 1110001A16Rik  
1435756\_at 0.89232 sterile alpha motif domain containing 10 Samd10  
1435757\_a\_at 0.93665 ubiquinol cytochrome c reductase core protein 2 Uqcrc2  
1435758\_at 1.08353 "similar to Beta-1,4-galactosyltransferase 6 (Beta-1,4-GalTase 6) (Beta4Gal-T6) (b4Gal-T6) (UDP-galactose:beta-N-acetylglucosamine beta-1,4-galactosyltransferase 6) (UDP-Gal:beta-GlcNAc beta-1,4-galactosyltransferase 6)" LOC675709  
1435759\_at 0.92629 cytidine 5'-triphosphate synthase 2 Ctps2  
1435760\_at 0.95961 cystatin A Csta  
1435761\_at 0.92305 stefin A3 Stfa3  
1435762\_at 0.88862 phosphofurin acidic cluster sorting protein 1 Pacs1  
1435763\_at 0.93635 "TBC1 domain family, member 16" Tbc1d16  
1435764\_a\_at 0.98657 gem (nuclear organelle) associated protein 7 Gemin7  
1435765\_at 0.94766 RIKEN cDNA E130114P18 gene E130114P18Rik  
1435766\_at 0.99618 periphilin 1 Pphln1  
1435767\_at 1.13344 "sodium channel, voltage-gated, type III, beta" Scn3b  
1435768\_at 0.93436 AT rich interactive domain 4B (*Rbp1* like) Arid4b  
1435769\_at 0.86913 A kinase (PRKA) anchor protein (*yotiao*) 9 Akap9  
1435770\_at 0.90343 thioredoxin domain containing 13 Txndc13  
1435771\_at 0.85104 "phospholipase C, beta 4" Plcb4  
1435772\_at 0.93781 kinesin family member 21B Kif21b  
1435773\_at 1.09032 RIKEN cDNA 4930547N16 gene 4930547N16Rik

1435774\_at 1.13722 expressed sequence AV024533 AV024533  
1435775\_at 0.84657 circadian locomoter output cycles kaput Clock  
1435776\_at 1.02850 RIKEN cDNA 2310009B15 gene 2310009B15Rik  
1435777\_at 0.98342 RIKEN cDNA E030018N11 gene E030018N11Rik  
1435778\_at 0.93930 ankyrin repeat domain 11 Ankrd11  
1435779\_at 1.13259 centrosomal protein 110 Cep110  
1435780\_at 0.98591 pleckstrin and Sec7 domain containing Psd  
1435781\_at 0.71015 cullin associated and neddylation disassociated 1 Cand1  
1435782\_at 1.02301 similar to ubiquitin A-52 residue ribosomal protein fusion product 1  
LOC668206  
1435783\_at 1.09370 RIKEN cDNA B230112C05 gene B230112C05Rik  
1435784\_at 0.98375 autophagy-related 9A (yeast) Atg9a  
1435785\_at 0.82521 similar to EH-domain containing 2 LOC673251  
1435786\_at 0.95662 kelch-like 12 (Drosophila) Klhl12  
1435787\_at 0.96620 protein phosphatase 1 (formerly 2C)-like Ppm11  
1435788\_at 0.83283 RIKEN cDNA 2900086B20 gene 2900086B20Rik  
1435789\_x\_at 0.95150 Transcribed locus ---  
1435790\_at 0.88336 olfactomedin 2 Olfm2  
1435791\_x\_at 1.03006 ribosomal protein L17 Rpl17  
1435792\_at 1.01766 component of Sp100-rs /// similar to component of Sp100-rs Csprs ///  
LOC665338  
1435793\_at 0.81980 anterior pharynx defective 1b homolog (C. elegans) Aph1b  
1435794\_at 0.92377 cDNA sequence BC050254 BC050254  
1435795\_at 0.90916 "galactosidase, beta 1" Glb1  
1435796\_at 1.00427 RIKEN cDNA C530024P05 gene C530024P05Rik  
1435797\_at 1.00940 "DNA segment, Chr 5, Wayne State University 178, expressed" D5Wsu178e  
1435798\_a\_at 0.87282 "splicing factor, arginine/serine-rich 14" Sfrs14  
1435799\_at 0.94099 "splicing factor, arginine/serine-rich 14" Sfrs14  
1435800\_a\_at 1.03059 cold shock domain protein A Csda  
1435801\_at 0.89532 Fukuyama type congenital muscular dystrophy homolog (human) Fcmd  
1435802\_at 0.92584 zinc finger protein 499 Zfp499  
1435803\_a\_at 1.10541 eukaryotic translation initiation factor 4E member 2 Eif4e2  
1435804\_at 0.91756 eukaryotic translation initiation factor 4E member 2 Eif4e2  
1435805\_at 0.98255 lin-7 homolog A (C. elegans) Lin7a  
1435806\_at 1.02282 --- ---  
1435807\_at 1.20783 cell division cycle 42 homolog (S. cerevisiae) Cdc42  
1435808\_at 0.97172 RIKEN cDNA A230051G13 gene A230051G13Rik  
1435809\_at 0.88780 ankyrin repeat domain 34 Ankrd34  
1435810\_at 1.09144 RIKEN cDNA 5730455O13 gene 5730455O13Rik  
1435811\_a\_at 1.02281 unc-50 homolog (C. elegans) Unc50  
1435812\_at 0.99933 unc-50 homolog (C. elegans) Unc50  
1435813\_at 1.07569 myopalladin Mypn  
1435814\_at 1.11273 exportin 7 Xpo7

1435815\_at 0.95535 "leucine zipper, down-regulated in cancer 1" Ldoc1  
 1435816\_at 1.17295 ribosomal protein S6 /// similar to 40S ribosomal protein S6 /// similar to 40S  
 ribosomal protein S6 /// similar to 40S ribosomal protein S6 /// similar to 40S ribosomal protein S6 ///  
 similar to 40S ribosomal protein S6 /// similar to 40S ribosomal protein S6 /// similar to 40S ribosomal  
 protein S6 /// similar to 40S ribosomal protein S6 /// similar to 40S ribosomal protein S6 /// similar to 40S  
 ribosomal protein S6 /// similar to 40S ribosomal protein S6 /// similar to 40S ribosomal protein S6 /// similar to 40S  
 ribosomal protein S6 /// similar to 40S ribosomal protein S6 /// similar to 40S ribosomal protein S6 /// similar to 40S  
 Rps6 /// LOC214738 /// LOC216036 /// LOC384383 /// LOC545640 /// LOC626259 /// LOC629575 ///  
 LOC638497 /// LOC639124 /// LOC639593 /// LOC639750 /// LOC667717 /// LOC667739 ///  
 LOC667922 /// LOC671432 /// LOC672620 /// LOC675985 /// LOC676999  
 1435817\_x\_at 1.09296 ribosomal protein S6 /// similar to 40S ribosomal protein S6 /// similar to 40S  
 ribosomal protein S6 /// similar to 40S ribosomal protein S6 /// similar to 40S ribosomal protein S6 ///  
 similar to 40S ribosomal protein S6 /// similar to 40S ribosomal protein S6 /// similar to 40S ribosomal  
 protein S6 /// similar to 40S ribosomal protein S6 /// similar to 40S ribosomal protein S6 /// similar to 40S  
 ribosomal protein S6 /// similar to 40S ribosomal protein S6 /// similar to 40S ribosomal protein S6 /// similar to 40S  
 ribosomal protein S6 /// similar to 40S ribosomal protein S6 /// similar to 40S ribosomal protein S6 /// similar to 40S  
 Rps6 /// LOC214738 /// LOC216036 /// LOC384383 /// LOC545640 /// LOC626259 /// LOC629575 ///  
 LOC638497 /// LOC639124 /// LOC639593 /// LOC639750 /// LOC667717 /// LOC667739 ///  
 LOC667922 /// LOC671432 /// LOC672620 /// LOC675985 /// LOC676999  
 1435818\_at 1.00299 "Adult male corpus striatum cDNA, RIKEN full-length enriched library, clone:  
 C030020B06 product:unclassifiable, full insert sequence" ---  
 1435819\_at 1.37830 RIKEN cDNA 4922503N01 gene 4922503N01Rik  
 1435820\_x\_at 0.90749 "discoidin domain receptor family, member 1" Ddr1  
 1435821\_s\_at 1.00187 "protein phosphatase 1, regulatory (inhibitor) subunit 8" Ppp1r8  
 1435822\_at 0.96241 RIKEN cDNA D830012I24 gene D830012I24Rik  
 1435823\_x\_at 1.06256 EGF-like domain 7 Egfl7  
 1435824\_at 0.97962 YY1 transcription factor Yy1  
 1435825\_at 1.05464 "activin A receptor, type II-like 1" Acvrl1  
 1435826\_at 0.99264 RAD18 homolog (*S. cerevisiae*) Rad18  
 1435827\_at 0.99553 RIKEN cDNA 4933404O12 gene 4933404O12Rik  
 1435828\_at 1.06208 avian musculoaponeurotic fibrosarcoma (v-maf) AS42 oncogene homolog  
 Maf  
 1435829\_at 0.91448 RIKEN cDNA B930008K04 gene B930008K04Rik  
 1435830\_a\_at 0.84176 RIKEN cDNA 5430435G22 gene 5430435G22Rik  
 1435831\_at 1.40608 uroplakin 1B Upk1b  
 1435832\_at 1.08473 leucine rich repeat containing 4 Lrrc4  
 1435833\_at 1.18121 --- ---  
 1435834\_at 0.86267 growth arrest specific 2 Gas2  
 1435835\_at 0.93364 "Meckel syndrome, type 1" Mks1  
 1435836\_at 0.89156 "pyruvate dehydrogenase kinase, isoenzyme 1" Pdk1  
 1435837\_at 1.05154 "crystallin, alpha B" Cryab

1435838\_at 1.03116 alanine-glyoxylate aminotransferase 2 Agxt2  
1435839\_at 1.02508 Transcribed locus ---  
1435840\_x\_at 0.95798 "similar to 2-cell-stage, variable group, member 3" LOC625360  
1435841\_s\_at 0.91836 "succinate-Coenzyme A ligase, GDP-forming, beta subunit" Suclg2  
1435842\_at 0.98395 RIKEN cDNA 1110038O08 gene 1110038O08Rik  
1435843\_x\_at 1.03082 mitochondrial ribosomal protein S9 Mrps9  
1435844\_at 0.94704 RIKEN cDNA A330009N23 gene A330009N23Rik  
1435845\_at 0.90469 "B16 F10Y cells cDNA, RIKEN full-length enriched library, clone:  
G370036C05 product:unclassifiable, full insert sequence" ---  
1435846\_x\_at 0.93761 --- ---  
1435847\_at 1.06895 Cdc42 binding protein kinase alpha Cdc42bpa  
1435848\_at 0.98396 RIKEN cDNA D430041D05 gene D430041D05Rik  
1435849\_at 0.93716 RIKEN cDNA 6330417G02 gene 6330417G02Rik  
1435850\_at 0.96503 Transcribed locus ---  
1435851\_at 0.91655 "leucine-rich repeat LGI family, member 1" Lgi1  
1435852\_at 1.37964 "sprouty-related, EVH1 domain containing 3" Spred3  
1435853\_at 1.00937 RIKEN cDNA 9030605E09 gene 9030605E09Rik  
1435854\_at 1.13113 transmembrane protein 10 Tmem10  
1435855\_x\_at 0.99699 "aldehyde dehydrogenase 18 family, member A1" Aldh18a1  
1435856\_x\_at 0.93684 "SWI/SNF related, matrix associated, actin dependent regulator of chromatin,  
subfamily b, member 1" Smarcb1  
1435857\_s\_at 0.77480 amyloid beta (A4) precursor-like protein 1 Aplp1  
1435858\_at 0.92291 Transcribed locus ---  
1435859\_x\_at 0.99004 "proteasome (prosome, macropain) 26S subunit, ATPase 2" Psmc2  
1435860\_at 0.96581 "solute carrier family 5 (sodium-dependent vitamin transporter), member 6"  
Slc5a6  
1435861\_at 0.97064 "protein tyrosine phosphatase, receptor type, f polypeptide (PTPRF), interacting  
protein, alpha 1" Ppfial  
1435862\_at 0.94218 Son cell proliferation protein Son  
1435863\_at 1.09162 COMM domain containing 6 Commd6  
1435864\_a\_at 1.05630 RIKEN cDNA 1810063B05 gene 1810063B05Rik  
1435865\_at 1.01625 "histone 3, H2a" Hist3h2a  
1435866\_s\_at 0.85530 "histone 3, H2a" Hist3h2a  
1435867\_at 0.98146 "Visual cortex cDNA, RIKEN full-length enriched library, clone:K230008J08  
product:hypothetical protein, full insert sequence" ---  
1435868\_at 0.93002 ankyrin repeat domain 13c Ankrd13c  
1435869\_s\_at 1.12350 "adaptor protein complex AP-2, alpha 2 subunit" Ap2a2  
1435870\_at 1.02874 Synaptonemal complex protein 3 Sycp3  
1435871\_at 0.93428 RIKEN cDNA 2600009P04 gene 2600009P04Rik  
1435872\_at 0.95743 Transcribed locus ---  
1435873\_a\_at 0.99877 ribosomal protein L13a /// zinc finger protein 526 Rpl13a /// Zfp526  
1435874\_at 0.94977 --- ---  
1435875\_at 0.90989 "protein kinase, AMP-activated, beta 2 non-catalytic subunit" Prkab2

1435876\_at 0.99019 expressed sequence C86350 C86350  
1435877\_at 0.79304 serine/threonine kinase 38 like Stk381  
1435878\_at 1.03339 serine/threonine kinase 38 like Stk381  
1435879\_at 0.83860 thymoma viral proto-oncogene 3 Akt3  
1435880\_at 0.89118 ankrin repeat domain 50 Ankrd50  
1435881\_at 1.06912 poly(rC) binding protein 2 Pcbp2  
1435882\_at 0.97562 ubiquitin associated protein 2-like Ubap2l  
1435883\_at 1.09767 expressed sequence AW413431 AW413431  
1435884\_at 0.95464 intersectin 1 (SH3 domain protein 1A) Itsn1  
1435885\_s\_at 0.94929 intersectin 1 (SH3 domain protein 1A) Itsn1  
1435886\_at 0.98333 "DnaJ (Hsp40) homolog, subfamily B, member 12" Dnajb12  
1435887\_at 1.01595 "serine (or cysteine) peptidase inhibitor, clade A (alpha-1 antiproteinase, antitrypsin), member 11" Serpina11  
1435888\_at 1.06288 epidermal growth factor receptor Egfr  
1435889\_at 1.03058 MAP/microtubule affinity-regulating kinase 2 Mark2  
1435890\_at 1.02981 RIKEN cDNA 5730596K20 gene 5730596K20Rik  
1435891\_x\_at 0.98818 RIKEN cDNA 2610021A01 gene /// similar to zinc finger protein 347 2610021A01Rik /// LOC668572  
1435892\_at 0.99728 additional sex combs like 3 (Drosophila) Asxl3  
1435893\_at 0.92951 very low density lipoprotein receptor Vldlr  
1435894\_at 0.99380 hypothetical protein C030014L02 C030014L02  
1435895\_at 0.97574 RIKEN cDNA D930023J12 gene D930023J12Rik  
1435896\_at 1.01127 sideroflexin 2 /// similar to Sideroflexin-2 Sfxn2 /// LOC677143  
1435897\_at 1.02214 ribosomal protein L32 Rpl32  
1435898\_x\_at 0.95823 guanosine diphosphate (GDP) dissociation inhibitor 2 Gdi2  
1435899\_at 1.01803 RIKEN cDNA 9430079B08 gene 9430079B08Rik  
1435900\_at 0.89532 zinc finger protein 297B Zfp297b  
1435901\_at 0.94041 ubiquitin specific peptidase 40 Usp40  
1435902\_at 1.00187 nudix (nucleoside diphosphate linked moiety X)-type motif 18 Nudt18  
1435903\_at 0.93527 CD300A antigen Cd300a  
1435904\_at 1.08292 "eukaryotic translation initiation factor 2C, 3" Eif2c3  
1435905\_at 0.85379 "DNA segment, Chr 3, ERATO Doi 300, expressed" D3Ert300e  
1435906\_x\_at 1.16110 guanylate nucleotide binding protein 2 Gbp2  
1435907\_at 0.79251 neurexin II Nrnx2  
1435908\_at 0.98731 neurexin II Nrnx2  
1435909\_at 1.01489 RIKEN cDNA C030034I22 gene C030034I22Rik  
1435910\_at 0.80297 fatty acid desaturase 3 Fads3  
1435911\_s\_at 0.97964 "solute carrier family 2 (facilitated glucose transporter), member 12" Slc2a12  
1435912\_at 1.01853 UBX domain containing 7 Ubx7  
1435913\_at 0.77337 "beta-1,4-N-acetyl-galactosaminyl transferase 4" B4galnt4  
1435914\_at 1.03205 nuclear receptor co-repressor 1 Ncor1  
1435915\_at 1.07198 jumonji domain containing 4 Jmjd4  
1435916\_at 1.00212 RIKEN cDNA 2210410P13 gene 2210410P13Rik



1435917\_at 0.76004 Transcribed locus ---  
1435918\_at 0.97301 cDNA sequence BC055107 BC055107  
1435919\_at 1.01168 "ATPase, Na<sup>+</sup>/K<sup>+</sup> transporting, alpha 1 polypeptide" Atp1a1  
1435920\_x\_at 1.05299 "ATPase, Na<sup>+</sup>/K<sup>+</sup> transporting, alpha 1 polypeptide" Atp1a1  
1435921\_at 0.89427 "DNA segment, Chr 8, ERATO Doi 587, expressed" D8ErtD587e  
1435922\_at 1.00577 F-box and leucine-rich repeat protein 19 Fbxl19  
1435923\_at 0.98219 "gene model 237, (NCBI)" Gm237  
1435924\_at 1.15393 "transcription factor B1, mitochondrial" Tfb1m  
1435925\_at 0.97748 G protein-coupled receptor kinase-interactor 2 Git2  
1435926\_at 1.11093 RIKEN cDNA E030003F13 gene E030003F13Rik  
1435927\_at 0.88185 DENN/MADD domain containing 3 Dennd3  
1435928\_at 1.01299 --- ---  
1435929\_at 0.97024 similar to RIKEN cDNA 9630033F20 gene LOC677429  
1435930\_at 0.90046 zinc finger protein 291 Zfp291  
1435931\_at 1.15959 RIKEN cDNA E130308A19 gene E130308A19Rik  
1435932\_at 1.00382 Hermansky-Pudlak syndrome 6 Hps6  
1435933\_at 0.90258 "sodium channel, voltage-gated, type II, alpha 1" Scn2a1  
1435934\_at 1.24863 "NADH dehydrogenase (ubiquinone) 1, alpha/beta subcomplex, 1" Ndufab1  
1435935\_at 0.91403 Transcribed locus ---  
1435936\_at 0.86191 "Solute carrier family 13 (sodium-dependent citrate transporter), member 5" Slc13a5  
1435937\_at 0.85349 "serine palmitoyltransferase, long chain base subunit 2" Sptlc2  
1435938\_at 1.05124 cytoskeleton associated protein 2-like Ckap2l  
1435939\_s\_at 0.96541 expressed sequence AI987662 AI987662  
1435940\_at 0.72764 expressed sequence AI836758 AI836758  
1435941\_at 0.80600 "rhomboid, veinlet-like 3 (Drosophila)" Rhbdl3  
1435942\_at 1.02216 "potassium voltage-gated channel, subfamily Q, member 2" Kcnq2  
1435943\_at 1.05413 dipeptidase 1 (renal) Dpep1  
1435944\_s\_at 1.16211 centromere protein B Cenpb  
1435945\_a\_at 1.14481 "potassium intermediate/small conductance calcium-activated channel, subfamily N, member 4" Kcnn4  
1435946\_at 0.89983 "DNA segment, Chr 5, ERATO Doi 135, expressed" D5ErtD135e  
1435947\_at 1.03382 RIKEN cDNA 2810455D13 gene 2810455D13Rik  
1435948\_at 1.13635 G protein-coupled receptor 178 Gpr178  
1435949\_at 0.99291 zinc finger CCCH type containing 3 Zc3h3  
1435950\_at 0.65833 hairless Hr  
1435951\_at 0.91261 glutamate receptor interacting protein 1 Grip1  
1435952\_at 0.76390 --- ---  
1435953\_at 1.33151 "BTAF1 RNA polymerase II, B-TFIID transcription factor-associated, (Mot1 homolog, S. cerevisiae)" Btaf1  
1435954\_at 0.87640 zinc finger protein 710 Zfp710  
1435955\_at 1.25038 sialic acid binding Ig-like lectin G Siglecg  
1435956\_at 0.92852 RIKEN cDNA A930004K21 gene A930004K21Rik

1435957\_at 1.02176 hypothetical protein B830032F12 B830032F12  
1435958\_at 1.01276 "phosphatidylinositol glycan anchor biosynthesis, class B" Pigb  
1435959\_at 0.98955 Rho GTPase activating protein 15 Arhgap15  
1435960\_at 0.99679 Similar to KIAA1183 protein LOC434128  
1435961\_at 0.89191 cDNA sequence BC047219 BC047219  
1435962\_at 1.10190 ribosomal protein S6 /// similar to 40S ribosomal protein S6 /// similar to 40S  
ribosomal protein S6 /// similar to 40S ribosomal protein S6 /// similar to 40S ribosomal protein S6 ///  
similar to 40S ribosomal protein S6 /// similar to 40S ribosomal protein S6 /// similar to 40S ribosomal  
protein S6 /// similar to 40S ribosomal protein S6 /// similar to 40S ribosomal protein S6 /// similar to  
40S ribosomal protein S6 /// similar to 40S ribosomal protein S6 /// similar to 40S ribosomal protein  
S6 /// similar to 40S ribosomal protein S6 Rps6 /// LOC214738 /// LOC384383 /// LOC545640 ///  
LOC626259 /// LOC629575 /// LOC638497 /// LOC639593 /// LOC639750 /// LOC667739 ///  
LOC667922 /// LOC671432 /// LOC672620 /// LOC675985  
1435963\_at 1.00442 --- ---  
1435964\_a\_at 1.30965 TAO kinase 3 Taok3  
1435965\_at 1.00342 "CCR4-NOT transcription complex, subunit 3" Cnot3  
1435966\_x\_at 1.01472 mitochondrial ribosomal protein L13 Mrpl13  
1435967\_s\_at 0.88717 3-hydroxyisobutyrate dehydrogenase Hibadh  
1435968\_at 0.86855 "Protein tyrosine phosphatase, receptor type, N polypeptide 2" Ptpn2  
1435969\_at 1.07530 BTB (POZ) domain containing 12 Btbd12  
1435970\_at 0.98961 nemo like kinase Nlk  
1435971\_at 0.93633 regulating synaptic membrane exocytosis 3 Rims3  
1435972\_at 0.92013 calpastatin Cast  
1435973\_at 1.05192 Transcribed locus ---  
1435974\_at 0.94113 Cdc42 guanine nucleotide exchange factor (GEF) 9 Arhgef9  
1435975\_at 0.92062 expressed sequence AI115600 AI115600  
1435976\_at 0.87724 --- ---  
1435977\_at 0.88083 "hepatoma-derived growth factor, related protein 3" Hdgfrp3  
1435978\_at 1.14046 GDP-mannose pyrophosphorylase A Gmppa  
1435979\_a\_at 1.08234 myosin XVB Myo15b  
1435980\_x\_at 0.96176 wingless-related MMTV integration site 6 Wnt6  
1435981\_at 0.69467 RIKEN cDNA E430014L09 gene E430014L09Rik  
1435982\_at 0.96628 syntaxin 12 Stx12  
1435983\_at 1.06082 RIKEN cDNA 1700019P01 gene 1700019P01Rik  
1435984\_at 1.17237 RIKEN cDNA 1110033F14 gene 1110033F14Rik  
1435985\_at 1.08552 "FERM, RhoGEF and pleckstrin domain protein 2" Farp2  
1435986\_x\_at 0.94152 "succinate dehydrogenase complex, subunit C, integral membrane protein"  
Sdhc  
1435987\_x\_at 0.91486 RIKEN cDNA 1110059G02 gene 1110059G02Rik  
1435988\_x\_at 0.99148 IK cytokine Ik  
1435989\_x\_at 0.97608 "similar to Keratin, type II cytoskeletal 8 (Cytokeratin 8) (Cytokeratin endo  
A) /// similar to Keratin, type II cytoskeletal 8 (Cytokeratin-8) (CK-8) (Keratin-8) (K8) (Cytokeratin  
endo A)" LOC434261 /// LOC675884

1435990\_at 0.45066 "a disintegrin-like and metallopeptidase (reprolysin type) with thrombospondin type 1 motif, 2" Adamts2

1435991\_at 0.84226 "nuclear receptor subfamily 3, group C, member 2" Nr3c2

1435992\_at 0.84086 IQ motif containing with AAA domain Iqca

1435993\_at 0.95141 zinc finger protein 306-like RP23-298F22.2

1435994\_at 1.10669 "potassium voltage-gated channel, subfamily H (eag-related), member 1" Kcnh1

1435995\_at 1.14914 mitochondrial ribosomal protein L22 Mrpl22

1435996\_at 0.97342 "caspase recruitment domain family, member 11" Card11

1435997\_at 0.98657 sperm associated antigen 8 Spag8

1435998\_at 0.97136 "gene model 288, (NCBI)" Gm288

1435999\_at 0.94576 RIKEN cDNA C630041L24 gene C630041L24Rik

1436000\_a\_at 1.06500 S-phase kinase-associated protein 2 (p45) Skp2

1436001\_at 1.00480 RIKEN cDNA 2310028O11 gene 2310028O11Rik

1436002\_at 0.73157 Transcribed locus ---

1436003\_at 1.07715 vascular cell adhesion molecule 1 Vcam1

1436004\_at 0.98336 "ubiquitin specific peptidase 27, X chromosome" Usp27x

1436005\_at 0.95219 "splicing factor, arginine/serine-rich 14" Sfrs14

1436006\_at 0.91782 eukaryotic translation initiation factor 2 alpha kinase 1 Eif2ak1

1436007\_a\_at 0.97264 THUMP domain containing 1 Thumpd1

1436008\_at 1.07104 Tumor protein D52 Tpd52

1436009\_at 0.84689 ubiquitin specific peptidase 30 Usp30

1436010\_at 1.08041 cDNA sequence BC036313 BC036313

1436011\_at 1.08631 "engulfment and cell motility 2, ced-12 homolog (C. elegans)" Elmo2

1436012\_s\_at 0.92668 secernin 2 Scrn2

1436013\_at 0.95953 GSG1-like Gsg1l

1436014\_a\_at 0.98663 RUN and SH3 domain containing 1 Rusc1

1436015\_s\_at 1.00406 serine/threonine kinase 4 Stk4

1436016\_x\_at 0.93728 guanosine diphosphate (GDP) dissociation inhibitor 2 Gdi2

1436017\_at 1.07919 alanyl-tRNA synthetase like Aarsl

1436018\_at 0.95058 RIKEN cDNA 2700083E18 gene 2700083E18Rik

1436019\_a\_at 1.09444 trafficking protein particle complex 1 Trappc1

1436020\_at 1.04570 "DNA segment, Chr 8, ERATO Doi 457, expressed" D8Ertd457e

1436021\_at 1.06493 RIKEN cDNA A930031D07 gene A930031D07Rik

1436022\_at 0.91097 endonuclease G-like 1 Endogl1

1436023\_at 1.02429 BCL2-associated transcription factor 1 Bclaf1

1436024\_at 0.88914 RIKEN cDNA A930025D01 gene A930025D01Rik

1436025\_at 0.90156 RIKEN cDNA A430106J12 gene A430106J12Rik

1436026\_at 0.98287 zinc finger protein 703 Zfp703

1436027\_at 1.03807 oxysterol binding protein-like 11 Osbpl11

1436028\_at 0.93501 transmembrane protein 33 Tmem33

1436029\_at 0.99343 bicaudal C homolog 1 (Drosophila) Biccl

1436030\_at 0.91771 cache domain containing 1 Cachd1

1436031\_at 0.91420 cache domain containing 1 Cachd1

1436032\_at 0.94093 "Bone marrow macrophage cDNA, RIKEN full-length enriched library, clone:  
 I830083F22 product:unclassifiable, full insert sequence" ---  
 1436033\_at 0.84492 cDNA sequence BC031353 BC031353  
 1436034\_at 0.92936 centrosomal protein 68 Cep68  
 1436035\_at 0.98849 RIKEN cDNA 3830431G21 gene 3830431G21Rik  
 1436036\_at 0.94777 Wolf-Hirschhorn syndrome candidate 1 (human) Whsc1  
 1436037\_at 0.83404 ceramide kinase-like Cerkl  
 1436038\_a\_at 0.96528 "phosphatidylinositol glycan anchor biosynthesis, class P" Pigp  
 1436039\_at 1.06590 Transcribed locus ---  
 1436040\_at 1.08131 RIKEN cDNA 2310005L22 gene 2310005L22Rik  
 1436041\_at 0.94966 --- ---  
 1436042\_at 0.98757 talin 1 Tln1  
 1436043\_at 0.95616 "sodium channel, voltage-gated, type VII, alpha" Scn7a  
 1436044\_at 0.98275 "sodium channel, voltage-gated, type VII, alpha" Scn7a  
 1436045\_at 0.72026 testis specific 10 Tsga10  
 1436046\_x\_at 1.11855 ribosomal protein L29 /// similar to 60S ribosomal protein L29 /// similar to  
 60S ribosomal protein L29 /// similar to 60S ribosomal protein L29 /// similar to 60S ribosomal protein  
 L29 /// similar to 60S ribosomal protein L29 /// similar to 60S ribosomal protein L29 /// similar to 60S  
 ribosomal protein L29 /// hypothetical protein LOC669999 /// similar to 60S ribosomal protein L29 ///  
 similar to 60S ribosomal protein L29 Rpl29 /// LOC433350 /// LOC433941 /// LOC622707 ///  
 LOC626772 /// LOC665032 /// LOC666642 /// LOC667466 /// LOC669999 /// LOC670334 ///  
 LOC675846  
 1436047\_at 0.91072 "gene model 672, (NCBI)" Gm672  
 1436048\_at 0.95537 exocyst complex component 8 Exoc8  
 1436049\_at 0.88447 RIKEN cDNA 5730589K01 gene 5730589K01Rik  
 1436050\_x\_at 0.79135 hairy and enhancer of split 6 (Drosophila) Hes6  
 1436051\_at 1.12406 RIKEN cDNA 9630007J19 gene 9630007J19Rik  
 1436052\_at 0.89206 RIKEN cDNA 1700020O03 gene 1700020O03Rik  
 1436053\_at 1.01014 "TBC1 domain family, member 22B" Tbc1d22b  
 1436054\_at 0.89748 RIKEN cDNA 9130227C08Rik gene 9130227C08Rik  
 1436055\_at 1.11164 leucine rich repeat containing 15 Lrrc15  
 1436056\_at 0.85650 kinesin family member 13B Kif13b  
 1436057\_at 0.99856 "GTL2, imprinted maternally expressed untranslated mRNA" Gtl2  
 1436058\_at 1.43577 radical S-adenosyl methionine domain containing 2 Rsad2  
 1436059\_at 0.97023 "regulatory factor X, 1 (influences HLA class II expression)" Rfx1  
 1436060\_at 0.91812 RIKEN cDNA 0710005M24 gene 0710005M24Rik  
 1436061\_at 0.84431 --- ---  
 1436062\_at 1.01868 archain 1 Arcn1  
 1436063\_at 1.04813 lysyl oxidase-like 1 Lox11  
 1436064\_x\_at 1.03447 ribosomal protein S24 Rps24  
 1436065\_at 0.98819 RIKEN cDNA A130091K22 gene A130091K22Rik  
 1436066\_at 0.99711 "kalirin, RhoGEF kinase" Kalrn  
 1436067\_at 0.96199 zinc finger and BTB domain containing 10 /// similar to zinc finger and BTB

domain containing 10 Zbtb10 /// LOC669642

1436068\_at 0.89327 zinc finger and BTB domain containing 10 /// similar to zinc finger and BTB domain containing 10 Zbtb10 /// LOC669642

1436069\_at 1.17039 "inhibitor of growth family, member 5" Ing5

1436070\_at 0.98520 glyoxalase 1 Glo1

1436071\_at 0.86249 Ankyrin repeat domain 26 Ankrd26

1436072\_at 0.90810 --- ---

1436073\_at 0.94559 RIKEN cDNA A630007B06 gene /// similar to oocyte-testis gene 1 A630007B06Rik /// LOC671029

1436074\_at 0.96701 cDNA sequence AY078069 AY078069

1436075\_at 1.03917 secreted frizzled-related sequence protein 5 Sfrp5

1436076\_at 1.09905 "discs, large (Drosophila) homolog-associated protein 1" Dlgap1

1436077\_a\_at 0.77079 FCH domain only 1 Fcho1

1436078\_at 0.90341 FCH domain only 1 Fcho1

1436079\_s\_at 0.80932 "vesicle-associated membrane protein, associated protein B and C" Vapb

1436080\_at 1.02299 expressed sequence AW011738 AW011738

1436081\_a\_at 1.00734 zinc finger protein 414 Zfp414

1436082\_at 0.90034 "Myelin basic protein expression factor 2, repressor" Myef2

1436083\_at 0.89157 low density lipoprotein receptor-related protein 3 Lrp3

1436084\_at 0.95554 "scratch homolog 1, zinc finger protein (Drosophila)" Sqrt1

1436085\_at 0.99779 zinc finger and BTB domain containing 34 Zbtb34

1436086\_at 0.92623 RIKEN cDNA 4921526F01 gene 4921526F01Rik

1436087\_at 0.98644 dipeptidylpeptidase 10 Dpp10

1436088\_at 1.01331 RIKEN cDNA 0910001A06 gene 0910001A06Rik

1436089\_at 1.05768 integrator complex subunit 6 Ints6

1436090\_at 1.06737 ectonucleotide pyrophosphatase/phosphodiesterase 6 Enpp6

1436091\_at 1.10195 RIKEN cDNA 2810022L02 gene 2810022L02Rik

1436092\_at 0.77051 "Transcribed locus, moderately similar to XP\_574723.1 PREDICTED: similar to LRRGT00097 [Rattus norvegicus]" ---

1436093\_at 1.03351 Eph receptor A10 Epha10

1436094\_at 1.02977 VGF nerve growth factor inducible Vgf

1436095\_at 1.05752 chromodomain helicase DNA binding protein 5 Chd5

1436096\_at 1.19829 "Adult male corpora quadrigemina cDNA, RIKEN full-length enriched library, clone:B230209O07 product:unclassifiable, full insert sequence" ---

1436097\_x\_at 0.85399 Rho GTPase activating protein 9 Arhgap9

1436098\_at 1.01350 butyrylcholinesterase Bche

1436099\_at 1.03354 expressed sequence AI836003 AI836003

1436100\_at 0.90229 SH2 domain containing 5 Sh2d5

1436101\_at 1.02358 ring finger protein 24 Rnf24

1436102\_at 0.99740 SEC22 vesicle trafficking protein-like C (S. cerevisiae) Sec22c

1436103\_at 0.91729 RAB3A interacting protein Rab3ip

1436104\_a\_at 0.98823 RIKEN cDNA 2310015A05 gene 2310015A05Rik

1436105\_at 0.79897 RIKEN cDNA 2310015A05 gene 2310015A05Rik

1436106\_x\_at 0.89079 RIKEN cDNA 2310015A05 gene 2310015A05Rik  
1436107\_at 0.83177 "LSM8 homolog, U6 small nuclear RNA associated (*S. cerevisiae*)" Lsm8  
1436108\_at 0.94018 thioredoxin domain containing 9 Txndc9  
1436109\_at 0.92361 expressed sequence AI317395 AI317395  
1436110\_at 0.94556 "10 days neonate medulla oblongata cDNA, RIKEN full-length enriched library, clone:B830012K24 product:unclassifiable, full insert sequence" ---  
1436111\_at 1.01563 RIKEN cDNA E030011K20 gene E030011K20Rik  
1436112\_at 0.93367 expressed sequence AI118078 AI118078  
1436113\_a\_at 1.01730 suppression of tumorigenicity 13 St13  
1436114\_at 1.06223 "gene model 96, (NCBI)" Gm96  
1436115\_at 1.03714 "gene model 266, (NCBI)" Gm266  
1436116\_x\_at 1.04415 RIKEN cDNA 2900057D21 gene 2900057D21Rik  
1436117\_at 1.11918 RIKEN cDNA A830010M20 gene A830010M20Rik  
1436118\_at 0.88086 "vang-like 2 (van gogh, *Drosophila*)" Vangl2  
1436119\_at 1.06301 "aldehyde dehydrogenase 1 family, member L2" Aldh112  
1436120\_at 1.05827 "SET domain, bifurcated 2" Setdb2  
1436121\_a\_at 1.01475 non-SMC element 1 homolog (*S. cerevisiae*) Nsmc1  
1436122\_at 0.91277 zinc finger protein 667 Zfp667  
1436123\_at 0.99854 bassoon Bsn  
1436124\_at 1.29914 "phosphate cytidylyltransferase 1, choline, beta isoform" Pcyt1b  
1436125\_at 1.03282 "DNA segment, Chr 16, ERATO Doi 472, expressed" D16Ertd472e  
1436126\_at 1.16023 "dynein, axonemal, light intermediate polypeptide 1" Dnali1  
1436127\_at 0.91941 corticotropin releasing hormone binding protein Crhbp  
1436128\_at 1.10850 "pleckstrin homology domain containing, family A (phosphoinositide binding specific) member 8" Plekha8  
1436129\_at 0.89985 RIKEN cDNA 4930523C11 gene /// a disintegrin and metallopeptidase domain 6 4930523C11Rik /// Adam6  
1436130\_s\_at 0.91383 RIKEN cDNA 4930523C11 gene /// a disintegrin and metallopeptidase domain 6 4930523C11Rik /// Adam6  
1436131\_at 0.88671 sialic acid binding Ig-like lectin H Siglech  
1436132\_at 0.88159 RIKEN cDNA 9830001H06 gene 9830001H06Rik  
1436133\_at 1.14045 RIKEN cDNA 0610011N22 gene 0610011N22Rik  
1436134\_at 0.94515 "sodium channel, voltage-gated, type II, beta" Scn2b  
1436135\_at 1.11793 RIKEN cDNA 2900075N08 gene 2900075N08Rik  
1436136\_at 1.59393 nucleolar complex associated 2 homolog (*S. cerevisiae*) Noc21  
1436137\_at 0.97598 "solute carrier family 6 (neurotransmitter transporter), member 17" Slc6a17  
1436138\_at 0.96962 --- ---  
1436139\_at 0.95549 "Adult male medulla oblongata cDNA, RIKEN full-length enriched library, clone:6330445K22 product:unclassifiable, full insert sequence" ---  
1436140\_at 1.00952 RIKEN cDNA 1700027J05 gene 1700027J05Rik  
1436141\_at 0.94096 "zinc finger, matrin type 5" Zmat5  
1436142\_at 0.96536 RIKEN cDNA 3526401B18 gene 3526401B18Rik  
1436143\_at 0.89094 RIKEN cDNA 4933425L03 gene 4933425L03Rik

1436144\_at 0.90459 ribosomal protein L31 /// similar to ribosomal protein L31 Rpl31 /// LOC432681 /// LOC625917 /// LOC626367 /// LOC631731 /// LOC637860 /// LOC638399 /// LOC667682 /// LOC668409 /// LOC669190 /// LOC672957 /// LOC675096 /// LOC676592  
1436145\_at 1.27421 "Insulin-like growth factor 2, binding protein 3" Igf2bp3  
1436146\_at 1.05743 RIKEN cDNA 4930481A15 gene 4930481A15Rik  
1436147\_at 1.04574 Sorting nexin 19 Snx19  
1436148\_at 0.96594 "Adult male olfactory brain cDNA, RIKEN full-length enriched library, clone:6430531K17 product:unclassifiable, full insert sequence" ---  
1436149\_at 0.95922 "cytochrome c oxidase, subunit Vb" Cox5b  
1436150\_at 0.89352 RIKEN cDNA 1700066J24 gene 1700066J24Rik  
1436151\_x\_at 0.97190 cDNA sequence BC031781 BC031781  
1436152\_a\_at 1.03996 hepatitis B virus x interacting protein Hbxip  
1436153\_a\_at 0.93320 "zinc finger, MYND domain containing 11" Zmynd11  
1436154\_at 1.11058 "0 day neonate thymus cDNA, RIKEN full-length enriched library, clone: A430066P15 product:hypothetical protein, full insert sequence" ---  
1436155\_at 1.06825 nicotinamide nucleotide adenyltransferase 2 Nmnat2  
1436156\_at 1.14217 cell division cycle and apoptosis regulator 1 Ccar1  
1436157\_at 1.09304 cell division cycle and apoptosis regulator 1 Ccar1  
1436158\_at 1.13099 eukaryotic translation initiation factor 4E binding protein 2 Eif4ebp2  
1436159\_at 1.01511 ubiquitin specific peptidase 32 Usp32  
1436160\_at 0.93513 keratin 26 Krt26  
1436161\_at 0.83655 androgen-induced proliferation inhibitor Aprin  
1436162\_at 0.99788 RIKEN cDNA C730048C13 gene /// similar to integral membrane transport protein UST1R /// similar to integral membrane transport protein UST1R /// similar to integral membrane transport protein UST1R C730048C13Rik /// LOC434674 /// LOC623195 /// LOC674021  
1436163\_at 1.13637 "potassium inwardly-rectifying channel, subfamily J, member 16" Kcnj16  
1436164\_at 0.86922 "solute carrier family 30 (zinc transporter), member 1" Slc30a1  
1436165\_at 1.26252 LUC7-like 2 (S. cerevisiae) Luc7l2  
1436166\_at 0.96674 storkhead box 2 Stox2  
1436167\_at 0.96209 Src homology 2 domain containing F Shf  
1436168\_at 0.77961 RIKEN cDNA C730029A08 gene C730029A08Rik  
1436169\_at 0.88533 RIKEN cDNA C730029A08 gene C730029A08Rik  
1436170\_a\_at 1.13705 casein alpha s2-like A Csn1s2a  
1436171\_at 0.99162 Rho GTPase activating protein 30 Arhgap30  
1436172\_at 1.08395 hypothetical protein 9530028C05 9530028C05  
1436173\_at 0.99637 deleted in liver cancer 1 Dlc1  
1436174\_at 1.05171 "ATPase family, AAA domain containing 2" Atad2  
1436175\_at 1.08934 RIKEN cDNA A430107N12 gene A430107N12Rik  
1436176\_at 1.12620 synaptotagmin XI Syt11

1436177\_at 0.97635 Transcribed locus ---  
1436178\_at 0.79392 leprecan-like 1 Leprel1  
1436179\_a\_at 1.10727 "DnaJ (Hsp40) homolog, subfamily C, member 5" Dnajc5  
1436180\_at 1.04483 "DnaJ (Hsp40) homolog, subfamily C, member 5" Dnajc5  
1436181\_at 0.92391 development and differentiation enhancing factor 2 Ddef2  
1436182\_at 0.75046 "10 days embryo whole body cDNA, RIKEN full-length enriched library, clone:2610306G12 product:unclassifiable, full insert sequence" ---  
1436183\_at 1.08076 RIKEN cDNA 9830115L13 gene 9830115L13Rik  
1436184\_at 1.14153 "gene model 632, (NCBI)" Gm632  
1436185\_at 0.78273 expressed sequence AI314180 AI314180  
1436186\_at 0.94343 E2F transcription factor 8 E2f8  
1436187\_at 0.91997 RIKEN cDNA 1110054M08 gene 1110054M08Rik  
1436188\_a\_at 0.93027 N-myc downstream regulated gene 4 NdrG4  
1436189\_at 1.10695 "NAD(P)H dehydrogenase, quinone 2" Nqo2  
1436190\_at 0.88092 "neural precursor cell expressed, developmentally down-regulated gene 10" Nedd10  
1436191\_at 0.91379 AT rich interactive domain 4A (Rbp1 like) Arid4a  
1436192\_at 1.06325 ADP-ribosylation factor guanine nucleotide-exchange factor 2 (brefeldin A-inhibited) /// similar to ADP-ribosylation factor guanine nucleotide-exchange factor 2 (brefeldin A-inhibited) Arfgef2 /// LOC670796  
1436193\_at 0.87031 "mannosidase, alpha, class 1C, member 1" Man1c1  
1436194\_at 1.17262 RIKEN cDNA C330008K14 gene C330008K14Rik  
1436195\_at 0.80833 cDNA sequence BC046404 BC046404  
1436196\_at 1.26151 hypothetical protein C030046G05 C030046G05  
1436197\_at 1.00663 CDC42 binding protein kinase gamma (DMPK-like) Cdc42bpg  
1436198\_at 0.89452 prolyl endopeptidase Prep  
1436199\_at 1.05821 --- ---  
1436200\_at 1.04126 LON peptidase N-terminal domain and ring finger 3 Lonrf3  
1436201\_x\_at 1.05295 myelin basic protein Mbp  
1436202\_at 1.24702 --- ---  
1436203\_a\_at 0.86012 RIKEN cDNA 1110059G02 gene 1110059G02Rik  
1436204\_at 0.85628 RIKEN cDNA 1110059G02 gene 1110059G02Rik  
1436205\_at 0.93185 Transcribed locus ---  
1436206\_at 1.06960 F-box protein 10 Fbxo10  
1436207\_at 0.79631 transcription factor 3 Tcf3  
1436208\_at 0.95124 ankyrin repeat and SOCS box-containing protein 1 Asb1  
1436209\_at 1.07672 "DnaJ (Hsp40) homolog, subfamily C, member 16" Dnajc16  
1436210\_at 0.87996 RIKEN cDNA C330018K18 gene C330018K18Rik  
1436211\_at 1.13679 THO complex 4 Thoc4  
1436212\_at 0.84181 transmembrane protein 71 Tmem71  
1436213\_a\_at 0.88210 RIKEN cDNA 1110028C15 gene 1110028C15Rik  
1436214\_at 0.88355 RIKEN cDNA 1110028C15 gene 1110028C15Rik  
1436215\_at 1.08508 inositol polyphosphate multikinase Ipmk



1436216\_s\_at 1.10650 RIKEN cDNA 2610204M08 gene 2610204M08Rik  
1436217\_at 0.99165 zinc finger protein 148 Zfp148  
1436218\_at 0.82466 similar to leucine-rich repeat-containing G protein-coupled receptor 6 isoform 1 LOC676300  
1436219\_at 0.94137 RIKEN cDNA 4933403F05 gene 4933403F05Rik  
1436220\_at 0.85103 zinc finger protein 287 Zfp287  
1436221\_at 1.19115 "DNA segment, Chr 1, ERATO Doi 471, expressed" D1Ert471e  
1436222\_at 1.22208 growth arrest specific 5 Gas5  
1436223\_at 1.02462 integrin beta 8 Itgb8  
1436224\_at 0.85457 "18-day embryo whole body cDNA, RIKEN full-length enriched library, clone:1110061F19 product:unclassifiable, full insert sequence" ---  
1436225\_at 0.97266 "transient receptor potential cation channel, subfamily M, member 2" Trpm2  
1436226\_at 0.97680 "transcription elongation factor B (SIII), polypeptide 1" Tceb1  
1436227\_at 1.10678 Left-right determination factor 2 Lefty2  
1436228\_at 0.87426 --- ---  
1436229\_at 1.10726 CDNA sequence BC049806 BC049806  
1436230\_at 0.91022 G protein-coupled receptor 114 Gpr114  
1436231\_at 0.93777 RIKEN cDNA 2900052N01 gene 2900052N01Rik  
1436232\_a\_at 0.92128 "GA repeat binding protein, beta 1" Gabpb1  
1436233\_at 0.97328 expressed sequence AI117581 AI117581  
1436234\_at 0.93156 RIKEN cDNA 4732471D19 gene 4732471D19Rik  
1436235\_x\_at 0.87120 RIKEN cDNA 4732471D19 gene 4732471D19Rik  
1436236\_x\_at 0.91696 coactosin-like 1 (Dictyostelium) Cot11  
1436237\_at 0.95951 tetratricopeptide repeat domain 9 Ttc9  
1436238\_at 0.87158 "leucine-rich repeat LGI family, member 3" Lgi3  
1436239\_at 1.00393 "solute carrier family 5 (sodium iodide symporter), member 5" Slc5a5  
1436240\_at 0.87350 sclerostin Sost  
1436241\_s\_at 0.99812 histone cell cycle regulation defective homolog A (S. cerevisiae) Hira  
1436242\_a\_at 0.98827 chemokine-like factor Cklf  
1436243\_at 0.97627 RIKEN cDNA A930004K21 gene A930004K21Rik  
1436244\_a\_at 0.69211 "transducin-like enhancer of split 2, homolog of Drosophila E(spl)" Tle2  
1436245\_at 0.95687 ubiquitin specific peptidase 20 Usp20  
1436246\_at 1.01718 "Adult male medulla oblongata cDNA, RIKEN full-length enriched library, clone:6330566A22 product:unclassifiable, full insert sequence" ---  
1436247\_at 1.09066 integrator complex subunit 2 Ints2  
1436248\_at 0.98868 "Adult male spinal cord cDNA, RIKEN full-length enriched library, clone:A330033L11 product:unclassifiable, full insert sequence" ---  
1436249\_at 1.01231 "tubulin tyrosine ligase-like family, member 4" Ttl4  
1436250\_at 0.85731 RIKEN cDNA 5430405G05 gene 5430405G05Rik  
1436251\_at 1.00533 phosphodiesterase 1C Pde1c  
1436252\_at 0.92685 "solute carrier family 45, member 1" Slc45a1  
1436253\_at 0.95758 peroxisome biogenesis factor 16 Pex16  
1436254\_at 1.24800 Transcribed locus ---

|              |         |                                                                                                                                     |                        |
|--------------|---------|-------------------------------------------------------------------------------------------------------------------------------------|------------------------|
| 1436255_at   | 0.94196 | RIKEN cDNA D830044I16 gene                                                                                                          | D830044I16Rik          |
| 1436256_at   | 0.87626 | "GrpE-like 2, mitochondrial"                                                                                                        | Grpel2                 |
| 1436257_at   | 1.41616 | "synovial sarcoma translocation, Chromosome 18"                                                                                     | Ss18                   |
| 1436258_at   | 1.04980 | Cdc42 guanine nucleotide exchange factor (GEF) 9                                                                                    | Arhgef9                |
| 1436259_at   | 1.07231 | Ankyrin repeat and SOCS box-containing protein 2                                                                                    | Asb2                   |
| 1436260_at   | 0.96694 | Transcribed locus                                                                                                                   | ---                    |
| 1436261_at   | 0.94690 | Dysferlin                                                                                                                           | Dysf                   |
| 1436262_x_at | 0.85046 | OTU domain containing 5                                                                                                             | Otud5                  |
| 1436263_at   | 1.00503 | myelin-associated oligodendrocytic basic protein                                                                                    | Mobp                   |
| 1436264_at   | 1.00622 | cDNA sequence BC025920                                                                                                              | BC025920               |
| 1436265_at   | 1.00968 | hypothetical protein 6330405H19                                                                                                     | 6330405H19             |
| 1436266_x_at | 0.99990 | chromobox homolog 1 (Drosophila HP1 beta)                                                                                           | Cbx1                   |
| 1436267_a_at | 1.00201 | FK506 binding protein 12-rapamycin associated protein 1                                                                             | Frap1                  |
| 1436268_at   | 1.11693 | dendrin                                                                                                                             | Ddn                    |
| 1436269_s_at | 1.30986 | HtrA serine peptidase 2                                                                                                             | Htra2                  |
| 1436270_at   | 0.88136 | "gene model 740, (NCBI)"                                                                                                            | Gm740                  |
| 1436271_at   | 0.94408 | "cDNA sequence BC085284 /// similar to apolipoprotein L, 3 (predicted)"                                                             | BC085284 /// LOC666348 |
| 1436272_at   | 0.77794 | RAB3 GTPase activating protein subunit 2                                                                                            | Rab3gap2               |
| 1436273_at   | 0.96111 | postmeiotic segregation increased 2 (S. cerevisiae)                                                                                 | Pms2                   |
| 1436274_at   | 0.92506 | Transcribed locus                                                                                                                   | ---                    |
| 1436275_at   | 0.91707 | ---                                                                                                                                 | ---                    |
| 1436276_at   | 0.94359 | Transcribed locus                                                                                                                   | ---                    |
| 1436277_at   | 1.05382 | RIKEN cDNA 330010C22 gene                                                                                                           | D330010C22Rik          |
| 1436278_at   | 0.94412 | ---                                                                                                                                 | ---                    |
| 1436279_at   | 0.96932 | Transcribed locus                                                                                                                   | ---                    |
| 1436280_at   | 0.87791 | zinc finger protein 31                                                                                                              | Zfp31                  |
| 1436281_at   | 0.96936 | Similar to hypothetical protein FLJ38281                                                                                            | LOC245305              |
| 1436282_at   | 1.00237 | RIKEN cDNA 4732440D04 gene                                                                                                          | 4732440D04Rik          |
| 1436283_at   | 0.91550 | RIKEN cDNA D630042F21 gene                                                                                                          | D630042F21Rik          |
| 1436284_s_at | 0.72679 | zinc finger protein 319                                                                                                             | Zfp319                 |
| 1436285_at   | 0.90447 | coiled-coil domain containing 113                                                                                                   | Ccdc113                |
| 1436286_at   | 0.98278 | RIKEN cDNA B830017H08 gene                                                                                                          | B830017H08Rik          |
| 1436287_at   | 0.93931 | "13 days embryo head cDNA, RIKEN full-length enriched library, clone:3110033I20 product:hypothetical protein, full insert sequence" | ---                    |
| 1436288_at   | 0.97051 | RIKEN cDNA 1700049M11 gene                                                                                                          | 1700049M11Rik          |
| 1436289_x_at | 1.10907 | RIKEN cDNA 1600014C10 gene                                                                                                          | 1600014C10Rik          |
| 1436290_at   | 0.99771 | ---                                                                                                                                 | ---                    |
| 1436291_a_at | 0.97867 | dihydropyrimidinase                                                                                                                 | Dpys                   |
| 1436292_a_at | 0.96401 | ornithine decarboxylase antizyme                                                                                                    | Oaz1                   |
| 1436293_x_at | 1.06223 | "DNA segment, Chr 1, ERATO Doi 471, expressed"                                                                                      | D1Ertd471e             |
| 1436294_at   | 0.83556 | ankyrin repeat domain 29                                                                                                            | Ankrd29                |
| 1436295_at   | 1.03917 | hypocretin (orexin) receptor 1                                                                                                      | Hcrtr1                 |

1436296\_x\_at 1.01545 "Similar to dynein, axonemal, intermediate polypeptide 2" LOC432611  
 1436297\_a\_at 0.94354 "glutamate receptor, ionotropic, N-methyl D-aspartate-associated protein 1  
 (glutamate binding)" Grina  
 1436298\_x\_at 0.97775 "phosphoribosylaminoimidazole carboxylase,  
 phosphoribosylaminoribosylaminoimidazole, succinocarboxamide synthetase" Paics  
 1436299\_at 1.05512 glutaminase Gls  
 1436300\_at 0.84495 receptor interacting protein kinase 5 Ripk5  
 1436301\_at 0.87868 receptor interacting protein kinase 5 Ripk5  
 1436302\_at 0.90150 RIKEN cDNA 2410193C02 gene 2410193C02Rik  
 1436303\_at 1.01505 myeloid/lymphoid or mixed lineage-leukemia translocation to 4 homolog  
 (Drosophila) Mllt4  
 1436304\_at 1.04698 RIKEN cDNA C030003D03 gene C030003D03Rik  
 1436305\_at 1.00709 IBR domain containing 1 Ibrdc1  
 1436306\_at 1.00029 "SAPS domain family, member 1" Saps1  
 1436307\_at 0.95647 myosin IXa Myo9a  
 1436308\_at 1.06642 zinc finger protein 292 Zfp292  
 1436309\_at 0.90043 neuropilin (NRP) and tolloid (TLL)-like 2 Neto2  
 1436310\_at 1.00027 gem (nuclear organelle) associated protein 5 Gemin5  
 1436311\_at 0.82074 gem (nuclear organelle) associated protein 5 Gemin5  
 1436312\_at 0.95449 "zinc finger protein, subfamily 1A, 1 (Ikaros)" Zfpn1a1  
 1436313\_at 1.05713 SCY1-like 2 (S. cerevisiae) Scyl2  
 1436314\_at 0.98827 SCY1-like 2 (S. cerevisiae) Scyl2  
 1436315\_at 0.96773 MYST histone acetyltransferase (monocytic leukemia) 3 Myst3  
 1436316\_at 0.84955 RIKEN cDNA 9430029L20 gene 9430029L20Rik  
 1436317\_at 0.97097 RIKEN cDNA D230012E17 gene D230012E17Rik  
 1436318\_at 1.00722 TAR DNA binding protein Tardbp  
 1436319\_at 0.96374 sulfatase 1 Sulf1  
 1436320\_at 0.88022 CDNA clone IMAGE:1328649 ---  
 1436321\_at 0.92716 "UDP-GlcNAc:betaGal beta-1,3-N-acetylglucosaminyltransferase 7" B3gnt7  
 1436322\_a\_at 0.94589 RIKEN cDNA 2810001A02 gene 2810001A02Rik  
 1436323\_at 1.00678 RIKEN cDNA 2810001A02 gene 2810001A02Rik  
 1436324\_at 1.06616 START domain containing 9 /// similar to StAR-related lipid transfer protein 9  
 (StARD9) (START domain-containing protein 9) /// similar to StAR-related lipid transfer protein 9  
 (StARD9) (START domain-containing protein 9) Stard9 /// LOC668856 /// LOC670354  
 1436325\_at 1.22973 RAR-related orphan receptor alpha Rora  
 1436326\_at 0.88293 RAR-related orphan receptor alpha Rora  
 1436327\_a\_at 1.06913 vacuolar protein sorting 53 (yeast) Vps53  
 1436328\_at 1.02987 RNA (guanine-7-) methyltransferase Rnmt  
 1436329\_at 1.00989 early growth response 3 Egr3  
 1436330\_x\_at 0.89522 similar to reduced expression 2 /// similar to reduced expression 2  
 LOC278757 /// LOC631624  
 1436331\_at 0.93566 vacuolar protein sorting 13 D (yeast) Vps13d  
 1436332\_at 0.91339 "heat shock protein, alpha-crystallin-related, B6" Hspb6

1436333\_at 1.09083 synaptojanin 1 Synj1  
1436334\_at 1.03429 synaptojanin 1 Synj1  
1436335\_at 0.93906 phospholipase C-like 4 Plcl4  
1436336\_at 1.10704 peptidyl-tRNA hydrolase 1 homolog (*S. cerevisiae*) Pth1  
1436337\_at 0.90883 cyclin D binding myb-like transcription factor 1 /// RIKEN cDNA 4930420K17  
gene Dmtf1 /// 4930420K17Rik  
1436338\_at 1.27683 --- ---  
1436339\_at 0.80653 RIKEN cDNA 1810058I24 gene 1810058I24Rik  
1436340\_at 0.99773 RIKEN cDNA 9630041G16 gene 9630041G16Rik  
1436341\_at 1.03377 homeobox containing 1 Hmbox1  
1436342\_a\_at 0.98963 "DNA segment, Chr 19, ERATO Doi 721, expressed" D19Ert721e  
1436343\_at 1.00749 chromodomain helicase DNA binding protein 4 Chd4  
1436344\_at 1.07793 --- ---  
1436345\_at 0.77045 RIKEN cDNA 5730559C18 gene 5730559C18Rik  
1436346\_at 0.92358 CD109 antigen Cd109  
1436347\_a\_at 1.06514 RIKEN cDNA 5530601H04 gene 5530601H04Rik  
1436348\_at 0.86539 Transcribed locus ---  
1436349\_at 0.83115 RIKEN cDNA 2700094K13 gene 2700094K13Rik  
1436350\_at 0.99799 RIKEN cDNA D430039N05 gene D430039N05Rik  
1436351\_at 1.14840 "coenzyme Q3 homolog, methyltransferase (yeast)" Coq3  
1436352\_at 1.00901 centrosomal protein 78 Cep78  
1436353\_at 1.16839 RIKEN cDNA A230046K03 gene A230046K03Rik  
1436354\_at 0.98790 DAZ interacting protein 1-like Dzip11  
1436355\_at 1.00373 "fatty acid desaturase domain family, member 6" Fads6  
1436356\_at 1.26082 "lectin, galactose binding, soluble 7" Lgals7  
1436357\_at 1.42311 "6 days neonate spleen cDNA, RIKEN full-length enriched library, clone:  
F430010L17 product:hypothetical protein, full insert sequence" ---  
1436358\_at 1.24270 ATP synthase mitochondrial F1 complex assembly factor 1 Atpaf1  
1436359\_at 0.88705 "16 days neonate cerebellum cDNA, RIKEN full-length enriched library,  
clone:9630013F18 product:unclassifiable, full insert sequence" ---  
1436360\_at 0.92182 GLI-Kruppel family member HKR2 Hkr2  
1436361\_at 0.85673 vestigial like 2 homolog (*Drosophila*) Vgl12  
1436362\_x\_at 1.41914 RIKEN cDNA 2700079J08 gene 2700079J08Rik  
1436363\_a\_at 0.77005 nuclear factor I/X Nfix  
1436364\_x\_at 0.76702 nuclear factor I/X Nfix  
1436365\_at 0.89247 zinc finger and BTB domain containing 7C Zbtb7c  
1436366\_at 0.91924 "protein phosphatase 1, regulatory (inhibitor) subunit 15b" Ppp1r15b  
1436367\_at 1.40086 "Protein tyrosine phosphatase, receptor type, B" Ptpb  
1436368\_at 0.79745 "solute carrier family 16 (monocarboxylic acid transporters), member 10"  
Slc16a10  
1436369\_at 0.95761 RIKEN cDNA 2900076A07 gene 2900076A07Rik  
1436370\_at 0.88488 guanylate cyclase 2c Gucy2c  
1436371\_at 0.95333 RecQ protein-like Recql

1436372\_a\_at 0.92298 RIKEN cDNA 2210010A19 gene 2210010A19Rik  
1436373\_at 1.15080 mitogen activated protein kinase kinase kinase 10 Map3k10  
1436374\_x\_at 1.00890 F11 receptor F11r  
1436375\_at 0.97302 S1 RNA binding domain 1 Srbd1  
1436376\_s\_at 0.98478 S1 RNA binding domain 1 Srbd1  
1436377\_at 0.86973 G protein-coupled receptor 137 Gpr137  
1436378\_at 0.88763 leucine rich repeat (in FLII) interacting protein 2 Lrrfip2  
1436379\_at 0.78811 CREB regulated transcription coactivator 3 Crtc3  
1436380\_at 1.23403 Cdc42 binding protein kinase alpha Cdc42bpa  
1436381\_at 1.04056 "discs, large (Drosophila) homolog-associated protein 3" Dlgap3  
1436382\_at 1.04576 zinc finger and BTB domain containing 12 Zbtb12  
1436383\_at 0.90257 complexin 2 Cplx2  
1436384\_at 1.05939 ribosomal protein S10 /// similar to ribosomal protein S10 /// similar to  
ribosomal protein S10 /// similar to ribosomal protein S10 /// similar to ribosomal protein S10 Rps10 ///  
LOC621772 /// LOC636539 /// LOC666274 /// LOC668457  
1436385\_at 0.91532 "glucosidase, alpha; neutral C" Ganc  
1436386\_x\_at 1.03817 Similar to reduced expression 2 LOC195531  
1436387\_at 1.09467 RIKEN cDNA C330006P03 gene C330006P03Rik  
1436388\_a\_at 0.85133 RIKEN cDNA 3830406C13 gene 3830406C13Rik  
1436389\_at 0.94336 Transcribed locus ---  
1436390\_a\_at 0.90988 chloride channel CLIC-like 1 Clcc1  
1436391\_s\_at 0.93936 chloride channel CLIC-like 1 Clcc1  
1436392\_s\_at 1.13820 "transcription factor AP-2, gamma" Tcfap2c  
1436393\_a\_at 0.96703 tripartite motif protein 37 Trim37  
1436394\_at 1.02485 tripartite motif protein 37 Trim37  
1436395\_at 0.86592 "caspase recruitment domain family, member 6" Card6  
1436396\_at 0.99168 RIKEN cDNA D430033N04 gene D430033N04Rik  
1436397\_at 0.95631 cDNA sequence BC027057 BC027057  
1436398\_at 0.86738 Lymphoid enhancer binding factor 1 Lef1  
1436399\_s\_at 0.93121 Nik related kinase Nrk  
1436400\_at 0.84414 --- ---  
1436401\_at 0.90429 --- ---  
1436402\_at 0.89667 deoxyhypusine hydroxylase/monooxygenase Dohh  
1436403\_at 0.64978 cDNA sequence BC025575 BC025575  
1436404\_at 0.85271 TLC domain containing 1 Tlcd1  
1436405\_at 0.82995 dedicator of cytokinesis 4 Dock4  
1436406\_at 0.90793 RIKEN cDNA A930007I19 gene A930007I19Rik  
1436407\_at 1.07544 RIKEN cDNA 9430069J07 gene 9430069J07Rik  
1436408\_at 1.14109 reprimin-like Rprml  
1436409\_at 1.22709 "cytochrome c oxidase, subunit VIIIa" Cox8a  
1436410\_at 0.95894 "expressed sequence AI449023 /// gene model 941, (NCBI)" AI449023 ///  
Gm941  
1436411\_at 1.03110 ATPase type 13A5 Atp13a5

1436412\_at 1.06455 "7 days neonate cerebellum cDNA, RIKEN full-length enriched library, clone: A730031J22 product:unclassifiable, full insert sequence" ---

1436413\_at 1.16542 fyn-related kinase Frk

1436414\_at 0.89164 expressed sequence AW822216 AW822216

1436415\_at 0.90301 Transcribed locus ---

1436416\_x\_at 1.04945 fractured callus expressed transcript 1 Fxc1

1436417\_at 0.94030 --- ---

1436418\_at 0.98710 RIKEN cDNA 1600027N09 gene 1600027N09Rik

1436419\_a\_at 1.09377 RIKEN cDNA 1700097N02 gene 1700097N02Rik

1436420\_a\_at 1.01716 importin 4 Ipo4

1436421\_s\_at 1.03715 "actin related protein 2/3 complex, subunit 5-like" Arpc51

1436422\_at 0.99460 cDNA sequence BC026590 BC026590

1436423\_at 0.95363 RIKEN cDNA E430004N04 gene E430004N04Rik

1436424\_at 0.87402 RIKEN cDNA 1600020E01 gene 1600020E01Rik

1436425\_at 0.99763 ankyrin repeat domain 38 Ankrd38

1436426\_at 0.76887 RIKEN cDNA 5730509K17 gene 5730509K17Rik

1436427\_at 1.04538 PRP4 pre-mRNA processing factor 4 homolog B (yeast) Prpf4b

1436428\_at 0.99216 "cholinergic receptor, nicotinic, beta polypeptide 2 (neuronal)" Chrn2

1436429\_at 1.08341 zinc finger protein 606 Zfp606

1436430\_at 0.94262 RIKEN cDNA B430105G09 gene B430105G09Rik

1436431\_at 1.20909 RIKEN cDNA 1700025G04 gene 1700025G04Rik

1436432\_at 0.90845 RIKEN cDNA B230343J05 gene B230343J05Rik

1436433\_at 0.99632 cDNA sequence BC049762 BC049762

1436434\_at 1.13325 hypothetical protein 9230110J10 9230110J10

1436435\_at 0.90977 RIKEN cDNA 9530026P05 gene 9530026P05Rik

1436436\_at 0.79058 cornichon homolog 4 (Drosophila) Cnih4

1436437\_at 0.96983 "gene model 97, (NCBI)" Gm97

1436438\_s\_at 0.74433 --- ---

1436439\_at 0.91584 hypothetical protein LOC666145 /// hypothetical protein LOC672141 /// hypothetical protein LOC675886 LOC666145 /// LOC672141 /// LOC675886

1436440\_at 0.77950 RIKEN cDNA B230107K20 gene B230107K20Rik

1436441\_at 0.99571 Prostaglandin E receptor 4 (subtype EP4) Ptger4

1436442\_at 1.20400 "protein tyrosine phosphatase, non-receptor type 14" Ptpn14

1436443\_a\_at 0.91147 KDEL (Lys-Asp-Glu-Leu) containing 1 Kdelc1

1436444\_at 1.02819 RIKEN cDNA 6030405A18 gene 6030405A18Rik

1436445\_at 1.06519 "gene model 996, (NCBI)" Gm996

1436446\_at 1.12167 RIKEN cDNA 2310007O11 gene 2310007O11Rik

1436447\_at 1.06853 RIKEN cDNA A630026N12 gene A630026N12Rik

1436448\_a\_at 0.65489 prostaglandin-endoperoxide synthase 1 Ptgs1

1436449\_at 0.94889 "15 days embryo head cDNA, RIKEN full-length enriched library, clone: D930025C07 product:unclassifiable, full insert sequence" ---

1436450\_at 0.88801 "DNA segment, Chr 11, Brigham & Women's Genetics 0517 expressed" D11Bwg0517e

1436451\_a\_at 1.01169 transmembrane emp24 domain trafficking protein 2 Tmed2  
1436452\_x\_at 0.92210 transmembrane emp24 domain trafficking protein 2 Tmed2  
1436453\_at 0.92763 expressed sequence BB144871 BB144871  
1436454\_x\_at 0.93871 flap structure specific endonuclease 1 Fen1  
1436455\_at 0.96024 aspartate-beta-hydroxylase Asph  
1436456\_at 1.07065 RIKEN cDNA 9130023D20 gene 9130023D20Rik  
1436457\_at 1.37492 RIKEN cDNA F830028O17 gene F830028O17Rik  
1436458\_at 0.92008 "sema domain, transmembrane domain (TM), and cytoplasmic domain,  
(semaphorin) 6A" Sema6a  
1436459\_at 0.91021 G protein-coupled receptor 161 Gpr161  
1436460\_at 1.17115 cDNA sequence BC030440 BC030440  
1436461\_at 1.02519 "Adult male corpora quadrigemina cDNA, RIKEN full-length enriched library,  
clone:B230207H11 product:unclassifiable, full insert sequence" ---  
1436462\_at 1.15057 similar to gonadotropin inducible ovarian transcription factor 1 /// similar to zinc  
finger protein 709 /// similar to gonadotropin inducible ovarian transcription factor 1 /// similar to  
gonadotropin inducible ovarian transcription factor 1 LOC626832 /// LOC628147 /// LOC668030 ///  
LOC668066  
1436463\_at 1.04055 Janus kinase and microtubule interacting protein 2 Jakmip2  
1436464\_at 1.03544 "13 days embryo heart cDNA, RIKEN full-length enriched library, clone:  
D330003D13 product:unclassifiable, full insert sequence" ---  
1436465\_at 0.92451 kelch-like 1 (Drosophila) Klhl1  
1436466\_at 0.95668 RIKEN cDNA 9130227C08Rik gene 9130227C08Rik  
1436467\_at 0.98403 RIKEN cDNA D230004N17 gene D230004N17Rik  
1436468\_at 1.00132 "zinc finger, DHHC domain containing 8" Zdhhc8  
1436469\_at 1.14142 similar to bromodomain containing 7 LOC634327  
1436470\_at 0.98530 regulating synaptic membrane exocytosis 2 Rims2  
1436471\_at 0.90916 "RAB36, member RAS oncogene family" Rab36  
1436472\_at 1.08902 schlafen 9 Slfn9  
1436473\_at 1.11750 zinc finger protein 248 Zfp248  
1436474\_at 0.89552 mannose receptor-like precursor Mrcl  
1436475\_at 0.72295 Transcribed locus ---  
1436476\_at 0.83983 "DAN domain family, member 5" Dand5  
1436477\_x\_at 0.94679 "RAB2, member RAS oncogene family" Rab2  
1436478\_at 0.89569 RIKEN cDNA 1810013L24 gene 1810013L24Rik  
1436479\_a\_at 1.12102 dipeptidylpeptidase 7 Dpp7  
1436480\_at 1.10508 dipeptidylpeptidase 7 Dpp7  
1436481\_at 1.00977 Transcribed locus ---  
1436482\_a\_at 0.77202 syndecan 3 Sdc3  
1436483\_at 0.94428 myelin transcription factor 1-like Myt11  
1436484\_at 1.04752 RIKEN cDNA C030019I05 gene C030019I05Rik  
1436485\_s\_at 0.87361 whirlin Whrn  
1436486\_x\_at 1.03525 Whirlin Whrn  
1436487\_x\_at 1.58366 F-box and WD-40 domain protein 2 Fbxw2

1436488\_at 0.93066 --- ---  
1436489\_x\_at 0.92040 expressed sequence C85492 C85492  
1436490\_x\_at 1.02623 "RAN, member RAS oncogene family /// similar to RAN, member RAS  
oncogene family /// similar to RAN, member RAS oncogene family /// similar to RAN, member RAS  
oncogene family" Ran /// LOC625094 /// LOC626393 /// LOC671251  
1436491\_at 1.09304 RIKEN cDNA 5830431A10 gene 5830431A10Rik  
1436492\_x\_at 0.96920 RIKEN cDNA 6430514M23 gene 6430514M23Rik  
1436493\_at 1.03134 similar to Cortixin-1 LOC626281  
1436494\_x\_at 1.02618 TRM1 tRNA methyltransferase 1 homolog (S. cerevisiae) Trmt1  
1436495\_s\_at 0.87991 zinc finger protein 260 Zfp260  
1436496\_at 1.10148 RIKEN cDNA 1700012O15 gene 1700012O15Rik  
1436497\_at 0.98181 Insulin-like growth factor 1 Igf1  
1436498\_at 0.93249 ariadne ubiquitin-conjugating enzyme E2 binding protein homolog 1  
(Drosophila) Arih1  
1436499\_at 0.91726 transmembrane protein 23 Tmem23  
1436500\_at 0.92701 ribosomal protein S24 Rps24  
1436501\_at 0.53995 mitochondrial tumor suppressor 1 Mtus1  
1436502\_at 0.49530 mitochondrial tumor suppressor 1 Mtus1  
1436503\_at 1.02499 cDNA sequence BC048546 BC048546  
1436504\_x\_at 0.91350 apolipoprotein A-IV Apoa4  
1436505\_at 1.00180 peptidyl-prolyl isomerase G (cyclophilin G) Ppig  
1436506\_a\_at 1.06267 RIKEN cDNA 1110008H02 gene 1110008H02Rik  
1436507\_at 0.94267 interleukin-1 receptor-associated kinase 2 Irak2  
1436508\_at 0.95298 RIKEN cDNA 2410014A08 gene 2410014A08Rik  
1436509\_at 0.97004 RIKEN cDNA 2410014A08 gene 2410014A08Rik  
1436510\_a\_at 0.98078 leucine rich repeat (in FLII) interacting protein 2 Lrrfip2  
1436511\_at 1.03285 cDNA sequence BC031781 BC031781  
1436512\_at 0.94672 ADP-ribosylation factor-like 4C /// similar to ADP-ribosylation factor-like  
protein 7 Arl4c /// LOC632433  
1436513\_at 0.87695 "tetratricopeptide repeat, ankyrin repeat and coiled-coil containing 2" Tanc2  
1436514\_at 0.77940 glypican 4 Gpc4  
1436515\_at 0.93880 RIKEN cDNA E030004N02 gene E030004N02Rik  
1436516\_at 0.93772 abhydrolase domain containing 13 Abhd13  
1436517\_at 0.97162 "H1 histone family, member X" H1fx  
1436518\_at 0.94707 Ubiquitin specific peptidase 46 Usp46  
1436519\_a\_at 1.00856 RIKEN cDNA 1110057K04 gene 1110057K04Rik  
1436520\_at 1.06772 expressed sequence AI450948 AI450948  
1436521\_at 0.99694 "solute carrier family 36 (proton/amino acid symporter), member 2" Slc36a2  
1436522\_at 1.02666 mitogen activated protein kinase kinase kinase 3 Map3k3  
1436523\_s\_at 1.05685 RIKEN cDNA 1810022K09 gene 1810022K09Rik  
1436524\_at 1.36520 RIKEN cDNA 4833438C02 gene 4833438C02Rik  
1436525\_at 0.97892 "adaptor-related protein complex 3, sigma 2 subunit" Ap3s2  
1436526\_at 1.12267 "N-acetylglucosamine-1-phosphotransferase, gamma subunit" Gnptg



1436527\_at 1.14568 --- ---  
1436528\_at 0.68710 Kazal-type serine peptidase inhibitor domain 1 Kazald1  
1436529\_at 1.03843 G protein-coupled receptor 123 Gpr123  
1436530\_at 0.94232 CDNA clone MGC:107680 IMAGE:6766535 ---  
1436531\_at 1.04978 methionine aminopeptidase 2 Metap2  
1436532\_at 0.59348 doublecortin and CaM kinase-like 3 Dcamk13  
1436533\_at 1.06219 "TROVE domain family, member 2" Trove2  
1436534\_at 1.06184 "TROVE domain family, member 2" Trove2  
1436535\_at 1.10859 "TROVE domain family, member 2" Trove2  
1436536\_at 0.91278 RIKEN cDNA C730015A04 gene C730015A04Rik  
1436537\_at 0.76098 zinc finger protein 629 Zfp629  
1436538\_at 2.17121 ankyrin repeat domain 37 Ankrd37  
1436539\_at 0.79377 calmin Clmn  
1436540\_at 0.69001 RIKEN cDNA 6720427I07 gene 6720427I07Rik  
1436541\_at 1.07348 RIKEN cDNA 2310008H09 gene 2310008H09Rik  
1436542\_at 0.94237 Prostaglandin E receptor 1 (subtype EP1) Ptger1  
1436543\_at 0.91534 cDNA sequence BC034507 BC034507  
1436544\_at 0.89721 "ATPase, Class V, type 10D" Atp10d  
1436545\_at 1.00204 deltex 4 homolog (Drosophila) Dtx4  
1436546\_at 0.98832 Lix1-like Lix1l  
1436547\_at 1.02069 "diacylglycerol kinase, epsilon" Dgke  
1436548\_at 1.11720 RIKEN cDNA 1810012P15 gene 1810012P15Rik  
1436549\_a\_at 1.09729 heterogeneous nuclear ribonucleoprotein A1 Hnrpa1  
1436550\_at 1.08371 F-box protein 30 Fbxo30  
1436551\_at 1.06954 fibroblast growth factor receptor 1 Fgfr1  
1436552\_at 1.07713 janus kinase and microtubule interacting protein 2 Jakmip2  
1436553\_at 0.98812 lipoma HMGIC fusion partner-like protein 4 Lhfpl4  
1436554\_at 1.03799 "zinc finger protein, subfamily 1A, 5" Zfpn1a5  
1436555\_at 1.08139 "solute carrier family 7 (cationic amino acid transporter, y+ system), member 2" Slc7a2  
1436556\_at 1.02113 transmembrane protein 139 Tmem139  
1436557\_at 1.01886 keratin 73 Krt73  
1436558\_at 1.30511 Josephin domain containing 3 Josd3  
1436559\_a\_at 1.24422 "proteasome (prosome, macropain) 26S subunit, non-ATPase, 10" Psmd10  
1436560\_at 0.83391 expressed sequence AW124694 AW124694  
1436561\_at 1.02687 suppressor of variegation 3-9 homolog 2 (Drosophila) Suv39h2  
1436562\_at 1.15232 DEAD (Asp-Glu-Ala-Asp) box polypeptide 58 Ddx58  
1436563\_at 0.91315 RIKEN cDNA 4932441J04 gene 4932441J04Rik  
1436564\_at 0.88714 Regulating synaptic membrane exocytosis 4 Rims4  
1436565\_at 0.94824 CEA-related cell adhesion molecule 10 Ceacam10  
1436566\_at 0.95607 "Rab40b, member RAS oncogene family" Rab40b  
1436567\_a\_at 1.05289 "NADH dehydrogenase (ubiquinone) 1 alpha subcomplex, 7 (B14.5a)"  
Ndufa7

1436568\_at 1.01768 junction adhesion molecule 2 Jam2  
1436569\_at 0.82451 RIKEN cDNA C030045D06 gene C030045D06Rik  
1436570\_at 0.80055 Transcribed locus ---  
1436571\_at 1.04807 "Adult male testis cDNA, RIKEN full-length enriched library,  
clone:4930525M22 product:unclassifiable, full insert sequence" ---  
1436572\_at 0.88188 coiled-coil domain containing 45 Ccdc45  
1436573\_at 0.99071 secernin 3 Scrn3  
1436574\_at 1.08190 RIKEN cDNA 1700029I01 gene /// similar to zinc finger protein 665 /// similar  
to zinc finger protein 665 1700029I01Rik /// LOC666532 /// LOC671566  
1436575\_at 1.02715 "glutamate receptor ionotropic, NMDA3A" Grin3a  
1436576\_at 1.14300 RIKEN cDNA A630077B13 gene A630077B13Rik  
1436577\_at 0.96486 Cdc42 guanine nucleotide exchange factor (GEF) 9 Arhgef9  
1436578\_at 1.08275 RIKEN cDNA A330104H05 gene A330104H05Rik  
1436579\_s\_at 0.99709 expressed sequence AI839402 AI839402  
1436580\_at 0.87908 --- ---  
1436581\_at 0.91440 coiled-coil domain containing 39 Ccdc39  
1436582\_at 0.80078 "zinc finger, DHHC domain containing 15" Zdhhc15  
1436583\_at 2.02610 RIKEN cDNA 2600005O03 gene 2600005O03Rik  
1436584\_at 0.92696 sprouty homolog 2 (Drosophila) Spry2  
1436585\_at 0.93670 expressed sequence BB182297 BB182297  
1436586\_x\_at 1.10849 ribosomal protein S14 Rps14  
1436587\_at 1.02963 RIKEN cDNA 1700123D08 gene 1700123D08Rik  
1436588\_at 0.92153 rotatin Rttm  
1436589\_x\_at 1.00094 protein kinase D2 Prkd2  
1436590\_at 1.55332 "protein phosphatase 1, regulatory (inhibitor) subunit 3B" Ppp1r3b  
1436591\_at 0.86992 cDNA sequence BC023744 BC023744  
1436592\_at 0.91446 "12 days embryo head cDNA, RIKEN full-length enriched library,  
clone:3010015L05 product:unclassifiable, full insert sequence" ---  
1436593\_at 0.95321 RIKEN cDNA 1700016K19 gene 1700016K19Rik  
1436594\_at 0.90205 zinc finger protein 719 Zfp719  
1436595\_at 1.05073 RNA binding motif protein 34 Rbm34  
1436596\_at 0.84079 "H2A histone family, member V" H2afv  
1436597\_at 0.77488 ankyrin repeat and KH domain containing 1 Ankhd1  
1436598\_at 1.05820 --- ---  
1436599\_at 0.92003 Expressed sequence AW493225 AW493225  
1436600\_at 0.97817 trinucleotide repeat containing 9 Tnrc9  
1436601\_at 0.88269 F-box protein 46 Fbxo46  
1436602\_x\_at 1.07630 "calcium channel, voltage-dependent, N type, alpha 1B subunit" Cacna1b  
1436603\_at 0.98347 transducin (beta)-like 2 Tbl2  
1436604\_at 1.21078 "tubulin tyrosine ligase-like family, member 3" Ttl13  
1436605\_at 0.95379 transketolase Tkt  
1436606\_at 1.01260 "Adult male colon cDNA, RIKEN full-length enriched library,  
clone:9030003C19 product:unclassifiable, full insert sequence" ---

1436607\_a\_at 0.84638 RIKEN cDNA C330002I19 gene /// similar to kinase D-interacting substance  
220 C330002I19Rik /// LOC633081

1436608\_at 0.99075 cDNA sequence BC038822 BC038822

1436609\_a\_at 0.77380 low density lipoprotein receptor-related protein associated protein 1 Lrpap1

1436610\_at 1.00613 ankyrin repeat domain 12 Ankrd12

1436611\_at 1.03027 "solute carrier family 39 (zinc transporter), member 12" Slc39a12

1436612\_at 1.06120 RIKEN cDNA 2410004I01 gene 2410004I01Rik

1436613\_at 0.91014 "Coronin, actin binding protein 6" Coro6

1436614\_at 0.92233 expressed sequence AI843639 AI843639

1436615\_a\_at 0.91112 ornithine transcarbamylase Otc

1436616\_at 0.83112 expressed sequence R74740 R74740

1436617\_at 0.78709 centrin 4 Ctn4

1436618\_at 0.96976 sideroflexin 5 Sfxn5

1436619\_at 1.09077 RIKEN cDNA D630045M09 gene D630045M09Rik

1436620\_at 0.95386 coiled-coil domain containing 45 Ccdc45

1436621\_at 0.78467 P140 gene P140

1436622\_at 0.95535 IQ motif and Sec7 domain 2 Iqsec2

1436623\_at 0.90392 ectonucleoside triphosphate diphosphohydrolase 7 Entpd7

1436624\_at 0.93327 dynamin 3 Dnm3

1436625\_at 1.05255 "Fc receptor, IgG, high affinity I" Fcgr1

1436626\_at 0.98768 tetraspanin 11 Tspan11

1436627\_at 0.92680 "DNA segment, Chr 17, ERATO Doi 663, expressed" D17Ertd663e

1436628\_at 0.79270 unc-51-like kinase 4 (C. elegans) Ulk4

1436629\_at 0.98456 RIKEN cDNA A830041P22 gene A830041P22Rik

1436630\_at 1.03571 Aquaporin 11 Aqp11

1436631\_at 1.91058 RIKEN cDNA 2010010M04 gene 2010010M04Rik

1436632\_at 1.16610 RIKEN cDNA D130059P03 gene D130059P03Rik

1436633\_at 1.05706 BAH domain and coiled-coil containing 1 Bahcc1

1436634\_at 0.99846 roundabout homolog 3 (Drosophila) Robo3

1436635\_at 0.97731 ubiquitin-conjugating enzyme E2Z (putative) Ube2z

1436636\_at 0.96518 --- ---

1436637\_at 1.62479 Williams-Beuren syndrome chromosome region 1 homolog (human) Wbscr1

1436638\_at 0.82158 RIKEN cDNA 6720401G13 gene 6720401G13Rik

1436639\_at 0.99667 bolA-like 2 (E. coli) Bola2

1436640\_x\_at 0.99649 "1-acylglycerol-3-phosphate O-acyltransferase 1 (lysophosphatidic acid  
acyltransferase, delta)" Agpat4

1436641\_at 1.03295 expressed sequence AI415730 AI415730

1436642\_x\_at 1.09843 Myocyte enhancer factor 2D Mef2d

1436643\_x\_at 1.15333 hepcidin antimicrobial peptide 2 Hamp2

1436644\_x\_at 0.91658 transmembrane protein 25 Tmem25

1436645\_a\_at 1.02178 "CCR4-NOT transcription complex, subunit 4" Cnot4

1436646\_at 1.08480 Transcribed locus ---

1436647\_at 1.11021 tau tubulin kinase 2 Ttbk2

|              |         |                                                                      |            |               |
|--------------|---------|----------------------------------------------------------------------|------------|---------------|
| 1436648_at   | 0.91807 | nanos homolog 1 (Drosophila)                                         | Nanos1     |               |
| 1436649_at   | 1.01200 | "zinc finger protein, subfamily 1A, 3 (Aiolos)"                      | Zfpn1a3    |               |
| 1436650_at   | 0.86364 | filamin A interacting protein 1                                      | Filip1     |               |
| 1436651_at   | 0.96053 | Transcribed locus                                                    | ---        |               |
| 1436652_at   | 0.90486 | RIKEN cDNA 5830418K08                                                | gene       | 5830418K08Rik |
| 1436653_at   | 1.08800 | RIKEN cDNA 4833401D15                                                | gene       | 4833401D15Rik |
| 1436654_at   | 1.14955 | RIKEN cDNA 5830483C08                                                | gene       | 5830483C08Rik |
| 1436655_at   | 0.99208 | RIKEN cDNA 1300002A08                                                | gene       | 1300002A08Rik |
| 1436656_at   | 0.95885 | cDNA sequence BC062109                                               | BC062109   |               |
| 1436657_at   | 0.89235 | hypothetical protein LOC629972                                       | LOC629972  |               |
| 1436658_at   | 0.90036 | RIKEN cDNA B130024G19                                                | gene       | B130024G19Rik |
| 1436659_at   | 1.17516 | Double cortin and calcium/calmodulin-dependent protein kinase-like 1 |            |               |
| Dcamk1l      |         |                                                                      |            |               |
| 1436660_at   | 1.11793 | ribosome binding protein 1                                           | Rrbp1      |               |
| 1436661_at   | 1.01594 | dipeptidylpeptidase 10                                               | Dpp10      |               |
| 1436662_at   | 1.14866 | VPS10 domain receptor protein SORCS 1                                | Sorcs1     |               |
| 1436663_at   | 0.97432 | ---                                                                  | ---        |               |
| 1436664_a_at | 1.01417 | "solute carrier family 35 (UDP-galactose transporter), member 2"     |            | Slc35a2       |
| 1436665_a_at | 0.76581 | latent transforming growth factor beta binding protein 4             | Ltbp4      |               |
| 1436666_at   | 2.68294 | Flotillin 2                                                          | Flot2      |               |
| 1436667_at   | 1.07310 | "solute carrier family 6 (neurotransmitter transporter), member 20"  |            | Slc6a20       |
| 1436668_at   | 1.09104 | RIKEN cDNA 5730409G15                                                | gene       | 5730409G15Rik |
| 1436669_at   | 0.88478 | RIKEN cDNA 1700019G17                                                | gene       | 1700019G17Rik |
| 1436670_x_at | 1.04415 | RIKEN cDNA 1700019G17                                                | gene       | 1700019G17Rik |
| 1436671_at   | 0.86198 | hypothetical protein A030011M19                                      | A030011M19 |               |
| 1436672_at   | 1.18095 | RIKEN cDNA 5830428H23                                                | gene       | 5830428H23Rik |
| 1436673_at   | 0.95066 | RIKEN cDNA 2610020H08                                                | gene       | 2610020H08Rik |
| 1436674_at   | 0.96384 | Rap2 interacting protein                                             | Rap2ip     |               |
| 1436675_at   | 0.86582 | WD repeat domain 63                                                  | Wdr63      |               |
| 1436676_at   | 0.81106 | mitogen-activated protein kinase 8 interacting protein 3             |            | Mapk8ip3      |
| 1436677_at   | 1.41431 | RIKEN cDNA 1810032O08                                                | gene       | 1810032O08Rik |
| 1436678_at   | 0.78577 | ---                                                                  | ---        |               |
| 1436679_at   | 0.93777 | RIKEN cDNA 2210010N04                                                | gene       | 2210010N04Rik |
| 1436680_s_at | 0.95728 | damage specific DNA binding protein 2                                | Ddb2       |               |
| 1436681_x_at | 0.99886 | RIKEN cDNA 0610009D07                                                | gene       | 0610009D07Rik |
| 1436682_at   | 0.91510 | "thymosin, beta 10"                                                  | Tmsb10     |               |
| 1436683_at   | 1.12766 | RIKEN cDNA 1700011M02                                                | gene       | 1700011M02Rik |
| 1436684_a_at | 0.91961 | RIO kinase 2 (yeast)                                                 | Riok2      |               |
| 1436685_at   | 1.16525 | hypothetical LOC544888                                               | LOC544888  |               |
| 1436686_at   | 0.98370 | zinc finger protein 706                                              | Zfp706     |               |
| 1436687_x_at | 0.93664 | zinc finger protein 706                                              | Zfp706     |               |
| 1436688_x_at | 1.11888 | ribosomal protein L14                                                | Rpl14      |               |
| 1436689_a_at | 0.90680 | "aldehyde dehydrogenase 9, subfamily A1"                             |            | Aldh9a1       |

1436690\_at 0.94521 LPS-responsive beige-like anchor Lrba  
1436691\_x\_at 1.03804 peroxiredoxin 1 Prdx1  
1436692\_at 1.03760 "12 days embryo head cDNA, RIKEN full-length enriched library, clone:3000003N14 product:hypothetical protein, full insert sequence" ---  
1436693\_x\_at 0.99687 "solute carrier family 35, member E4" Slc35e4  
1436694\_s\_at 1.00732 neurogenic differentiation 4 Neurod4  
1436695\_x\_at 0.93942 RNA binding motif and ELMO domain 1 Rbed1  
1436696\_x\_at 1.02449 CEA-related cell adhesion molecule 11 Ceacam11  
1436697\_at 0.89635 Transcribed locus ---  
1436698\_x\_at 1.16244 cDNA sequence BC054438 BC054438  
1436699\_x\_at 1.08381 ribosomal protein L18 /// similar to 60S ribosomal protein L18 Rpl18 /// LOC672898  
1436700\_a\_at 1.11235 DEAD (Asp-Glu-Ala-Asp) box polypeptide 48 Ddx48  
1436701\_at 1.00836 tripartite motif-containing 61 Trim61  
1436702\_at 0.88109 RIKEN cDNA 1110038O08 gene 1110038O08Rik  
1436703\_x\_at 0.90275 "small nuclear RNA activating complex, polypeptide 2" Snapc2  
1436704\_x\_at 1.03208 "methylenetetrahydrofolate dehydrogenase (NADP+ dependent), methenyltetrahydrofolate cyclohydrolase, formyltetrahydrofolate synthase" Mthfd1  
1436705\_at 0.97612 transmembrane protein 32 Tmem32  
1436706\_at 0.97544 transmembrane protein 32 Tmem32  
1436707\_x\_at 0.97822 barren homolog (Drosophila) Brn1  
1436708\_x\_at 0.94560 minichromosome maintenance deficient 4 homolog (S. cerevisiae) Mcm4  
1436709\_at 0.90827 RIKEN cDNA C230096C10 gene C230096C10Rik  
1436710\_at 0.92941 "zinc finger, SWIM domain containing 4" Zswim4  
1436711\_at 0.95728 ARP5 actin-related protein 5 homolog (yeast) Actr5  
1436712\_at 0.94325 "phospholipase A2, group IVC (cytosolic, calcium-independent)" Pla2g4c  
1436713\_s\_at 1.02766 "GTL2, imprinted maternally expressed untranslated mRNA" Gtl2  
1436714\_at 1.04279 LIM domain containing preferred translocation partner in lipoma Lpp  
1436715\_s\_at 0.93362 CDP-diacylglycerol--inositol 3-phosphatidyltransferase (phosphatidylinositol synthase) Cdpt  
1436716\_at 0.96521 "protein phosphatase 1, regulatory (inhibitor) subunit 14B" Ppp1r14b  
1436717\_x\_at 0.92211 "hemoglobin Y, beta-like embryonic chain" Hbb-y  
1436718\_at 1.02799 neurexophilin 1 Nxph1  
1436719\_at 1.07593 "solute carrier family 35, member F1" Slc35f1  
1436720\_s\_at 0.97525 oogenesis 3 Oog3  
1436721\_x\_at 0.98399 oogenesis 3 Oog3  
1436722\_a\_at 1.00070 "actin, beta, cytoplasmic" Actb  
1436723\_at 1.00092 centromere protein I Cenpi  
1436724\_a\_at 0.90249 ligatin Lgtn  
1436725\_at 0.85056 RIKEN cDNA E130306D19 gene E130306D19Rik  
1436726\_s\_at 0.86357 "serine palmitoyltransferase, long chain base subunit 1" Sptlc1  
1436727\_x\_at 0.97572 "serine palmitoyltransferase, long chain base subunit 1" Sptlc1  
1436728\_s\_at 1.06285 regulator of telomere elongation helicase 1 Rtel1

1436729\_at 0.86942 RIKEN cDNA 2600003E23 gene 2600003E23Rik  
1436730\_at 1.02371 chloride channel CLIC-like 1 Clcc1  
1436731\_at 0.88198 zinc finger protein 533 Zfp533  
1436732\_s\_at 0.86766 F-box and WD-40 domain protein 8 Fbxw8  
1436733\_at 0.90018 RIKEN cDNA E130309F12 gene E130309F12Rik  
1436734\_at 0.89610 RIKEN cDNA E130309F12 gene E130309F12Rik  
1436735\_at 0.92539 NOL1/NOP2/Sun domain family 3 Nsun3  
1436736\_x\_at 0.48360 "DNA segment, human D4S114" D0H4S114  
1436737\_a\_at 0.61346 sorbin and SH3 domain containing 1 Sorbs1  
1436738\_at 1.09737 expressed sequence AI449441 AI449441  
1436739\_at 1.04685 "angiotensin II receptor, type 1a" Agtr1a  
1436740\_at 1.48466 RIKEN cDNA A430108E01 gene A430108E01Rik  
1436741\_at 0.99508 oocyte specific homeobox 1 /// similar to oocyte specific homeobox 3 /// similar  
to oocyte specific homeobox 3 /// similar to oocyte specific homeobox 2 /// similar to oocyte specific  
homeobox 1 Obox1 /// MGC117731 /// LOC545921 /// LOC666466 /// LOC674153  
1436742\_a\_at 1.00127 "gene model 1967, (NCBI)" Gm1967  
1436743\_at 1.09140 "immunoglobulin superfamily, member 4" Igsf4d  
1436744\_x\_at 1.05771 F-box and WD-40 domain protein 14 /// similar to F-box and WD-40 domain  
protein 14 /// similar to F-box and WD-40 domain protein 14 Fbxw14 /// LOC668758 /// LOC673189  
1436745\_at 0.84032 SCY1-like 1 binding protein 1 Scyl1bp1  
1436746\_at 0.95532 WNK lysine deficient protein kinase 1 Wnk1  
1436747\_at 0.92481 RIKEN cDNA 1110014K08 gene /// hypothetical protein LOC664786 ///  
hypothetical protein LOC664849 /// hypothetical protein LOC669054 /// hypothetical protein  
LOC672175 1110014K08Rik /// LOC664786 /// LOC664849 /// LOC669054 /// LOC672175  
1436748\_at 1.01299 RIKEN cDNA 1110014K08 gene 1110014K08Rik  
1436749\_at 1.11733 mesoderm development candiate 2 Mesdc2  
1436750\_a\_at 0.86749 3-oxoacid CoA transferase 1 Oxct1  
1436751\_at 0.99258 cDNA sequence BC052883 BC052883  
1436752\_at 0.92682 TBCC domain containing 1 Tbccd1  
1436753\_at 0.98052 aarF domain containing kinase 5 Adck5  
1436754\_at 0.77171 expressed sequence AI839735 /// hypothetical protein LOC638311  
AI839735 /// LOC638311  
1436755\_at 1.05694 inter-alpha (globulin) inhibitor H5 Itih5  
1436756\_x\_at 0.89778 "L-3-hydroxyacyl-Coenzyme A dehydrogenase, short chain" Hadhsc  
1436757\_a\_at 0.94065 "cytochrome c oxidase, subunit VIb polypeptide 1" Cox6b1  
1436758\_at 1.04679 histone deacetylase 4 Hdac4  
1436759\_x\_at 0.84773 "calponin 3, acidic" Cnn3  
1436760\_a\_at 1.04381 ribosomal protein S8 Rps8  
1436761\_s\_at 1.00343 RIKEN cDNA 1200015N20 gene 1200015N20Rik  
1436762\_x\_at 0.88039 Elongation protein 3 homolog (S. cerevisiae) Elp3  
1436763\_a\_at 0.78402 Kruppel-like factor 9 Klf9  
1436764\_at 1.09632 par-3 (partitioning defective 3) homolog (C. elegans) Pard3  
1436765\_at 1.08648 par-3 (partitioning defective 3) homolog (C. elegans) Pard3

1436766\_at 1.88066 LUC7-like 2 (S. cerevisiae) Luc712  
1436767\_at 1.94994 LUC7-like 2 (S. cerevisiae) Luc712  
1436768\_x\_at 0.95889 RIKEN cDNA E130112L23 gene /// similar to quattro E130112L23Rik ///  
LOC671456  
1436769\_at 1.15065 "proteasome (prosome, macropain) subunit, alpha type 1" Psmal1  
1436770\_x\_at 1.07169 "proteasome (prosome, macropain) subunit, alpha type 1" Psmal1  
1436771\_x\_at 1.23441 phosphogluconate dehydrogenase Pgd  
1436772\_at 1.02718 "Glutamate receptor, ionotropic, AMPA4 (alpha 4)" Gria4  
1436773\_x\_at 0.91674 MARVEL (membrane-associating) domain containing 1 Marveld1  
1436774\_at 0.92895 Sell (suppressor of lin-12) 1 homolog (C. elegans) Sellh  
1436775\_a\_at 0.98030 ankyrin repeat domain 17 Ankrd17  
1436776\_x\_at 0.80266 "solute carrier family 7 (cationic amino acid transporter, y+ system), member  
4" Slc7a4  
1436777\_at 1.01835 --- ---  
1436778\_at 0.98370 "cytochrome b-245, beta polypeptide" Cybb  
1436779\_at 0.87357 "cytochrome b-245, beta polypeptide" Cybb  
1436780\_at 1.08760 O-linked N-acetylglucosamine (GlcNAc) transferase (UDP-N-  
acetylglucosamine:polypeptide-N-acetylglucosaminyl transferase) Ogt  
1436781\_at 1.51557 "mannosidase 2, alpha B1" Man2b1  
1436782\_at 0.99467 --- ---  
1436783\_x\_at 0.86161 "tyrosine 3-monooxygenase/tryptophan 5-monooxygenase activation protein,  
beta polypeptide" Ywhab  
1436784\_x\_at 0.86037 "splicing factor 3b, subunit 4 /// similar to splicing factor 3b, subunit 4  
(predicted) /// similar to splicing factor 3b, subunit 4 (predicted)" Sf3b4 /// LOC634414 /// LOC666113  
1436785\_a\_at 1.06778 RIKEN cDNA 1110069O07 gene 1110069O07Rik  
1436786\_at 0.79609 RIKEN cDNA 1110069O07 gene 1110069O07Rik  
1436787\_x\_at 1.03002 RIKEN cDNA 1110069O07 gene 1110069O07Rik  
1436788\_at 1.06306 --- ---  
1436789\_at 1.01528 cyclin J-like Ccnj1  
1436790\_a\_at 1.11731 SRY-box containing gene 11 Sox11  
1436791\_at 0.92133 wingless-related MMTV integration site 5A Wnt5a  
1436792\_at 1.23495 WAS protein homology region 2 domain containing 1 Whdc1  
1436793\_at 0.97502 suppression of tumorigenicity 18 St18  
1436794\_at 1.03121 "NACHT, leucine rich repeat and PYD containing 4F" Nalp4f  
1436795\_at 0.83302 RIKEN cDNA 9630058J23 gene 9630058J23Rik  
1436796\_at 1.28738 RIKEN cDNA 1110061A14 gene 1110061A14Rik  
1436797\_a\_at 0.94532 surfeit gene 4 Surf4  
1436798\_at 0.87357 ribosomal protein L9 /// similar to ribosomal protein L9 /// similar to ribosomal  
protein L9 /// similar to 60S ribosomal protein L9 /// similar to ribosomal protein L9 /// similar to  
ribosomal protein L9 /// similar to 60S ribosomal protein L9 /// similar to ribosomal protein L9  
Rpl9 /// LOC432768 /// LOC433546 /// LOC667290 /// LOC670203 /// LOC671349 /// LOC672532 ///  
LOC674636  
1436799\_at 1.08780 RIKEN cDNA D230005D02 gene D230005D02Rik

1436800\_at 0.96101 follistatin-like 5 Fstl5  
1436801\_x\_at 0.99328 CDC42 effector protein (Rho GTPase binding) 4 Cdc42ep4  
1436802\_at 0.99336 interleukin enhancer binding factor 3 Ilf3  
1436803\_a\_at 1.00090 "NADH dehydrogenase (ubiquinone) 1 beta subcomplex, 9" Ndufb9  
1436804\_s\_at 1.06285 SCY1-like 1 (S. cerevisiae) Scyl1  
1436805\_at 1.14523 RIKEN cDNA 2810457I06 gene 2810457I06Rik  
1436806\_at 0.89835 tripartite motif-containing 62 Trim62  
1436807\_x\_at 0.87141 tripartite motif-containing 62 Trim62  
1436808\_x\_at 0.93693 "minichromosome maintenance deficient 5, cell division cycle 46 (S. cerevisiae)" Mcm5  
1436809\_a\_at 0.94952 spindlin Spin  
1436810\_x\_at 0.98306 RIKEN cDNA 2900010M23 gene 2900010M23Rik  
1436811\_at 0.98447 potassium channel tetramerisation domain containing 3 Kctd3  
1436812\_at 0.96239 fukutin related protein Fkrp  
1436813\_x\_at 1.14739 KH-type splicing regulatory protein Khgrp  
1436814\_at 0.99103 Two pore segment channel 2 Tpcn2  
1436815\_x\_at 0.98437 Two pore segment channel 2 Tpcn2  
1436816\_at 1.01467 Nucleoporin 133 Nup133  
1436817\_at 1.02647 exocyst complex component 5 Exoc5  
1436818\_a\_at 0.91374 Musashi homolog 2 (Drosophila) Msi2  
1436819\_at 0.92549 septin 6 6-Sep  
1436820\_at 0.95542 potassium channel tetramerisation domain containing 11 Kctd11  
1436821\_at 0.98909 "phosphatidylinositol-specific phospholipase C, X domain containing 3" Plcxd3  
1436822\_x\_at 1.05962 hexokinase 1 /// ribosomal protein L17 /// similar to 60S ribosomal protein L17 (L23) (Amino acid starvation-induced protein) (ASI) /// similar to 60S ribosomal protein L17 (L23) (Amino acid starvation-induced protein) (ASI) /// similar to 60S ribosomal protein L17 (L23) (Amino acid starvation-induced protein) (ASI) Hk1 /// Rpl17 /// LOC620155 /// LOC620303 /// LOC676276  
1436823\_x\_at 0.95289 "hemoglobin Y, beta-like embryonic chain" Hbb-y  
1436824\_x\_at 0.95014 ring finger protein 26 /// similar to ring finger protein 26 /// similar to ring finger protein 26 Rnf26 /// LOC668155 /// LOC669536  
1436825\_a\_at 1.04756 RIKEN cDNA A630095E13 gene A630095E13Rik  
1436826\_at 1.10675 transmembrane and tetratricopeptide repeat containing 3 Tmtc3  
1436827\_at 0.85127 "gene model 944, (NCBI)" Gm944  
1436828\_a\_at 0.98092 tumor protein D52-like 2 Tpd52l2  
1436829\_at 1.05825 tripartite motif-containing 67 Trim67  
1436830\_at 1.10480 MARVEL (membrane-associating) domain containing 1 Marveld1  
1436831\_at 0.95919 RIKEN cDNA 4932408B21 gene 4932408B21Rik  
1436832\_at 1.10320 RIKEN cDNA 1110067B18 gene 1110067B18Rik  
1436833\_x\_at 0.94834 tubulin tyrosine ligase-like 1 Ttll1  
1436834\_x\_at 0.97941 "malate dehydrogenase 1, NAD (soluble)" Mdh1  
1436835\_at 0.94754 v-crk sarcoma virus CT10 oncogene homolog (avian) Crk  
1436836\_x\_at 0.93379 "calponin 3, acidic" Cnn3  
1436837\_at 1.03487 maelstrom homolog (Drosophila) Mael



1436838\_x\_at 0.84476 coactosin-like 1 (Dictyostelium) Cot11  
1436839\_at 0.89522 --- ---  
1436840\_x\_at 0.99509 ribosomal protein L35 Rpl35  
1436841\_at 1.25873 RIKEN cDNA B230380D07 gene B230380D07Rik  
1436842\_at 1.06327 RIKEN cDNA B230380D07 gene B230380D07Rik  
1436843\_at 0.95293 RIKEN cDNA C430048L16 gene C430048L16Rik  
1436844\_at 1.27924 RIKEN cDNA 6330403M23 gene 6330403M23Rik  
1436845\_at 1.16064 axin2 Axin2  
1436846\_x\_at 0.94223 "tyrosine 3-monooxygenase/tryptophan 5-monooxygenase activation protein, theta polypeptide /// similar to 14-3-3 protein theta (14-3-3 protein tau) /// similar to 14-3-3 protein theta (14-3-3 protein tau)" Ywhaq /// LOC546165 /// LOC636369  
1436847\_s\_at 1.07647 cell division cycle associated 8 Cdca8  
1436848\_x\_at 1.00225 inositol (myo)-1(or 4)-monophosphatase 1 Impa1  
1436849\_x\_at 0.93851 "glucosidase, alpha, acid" Gaa  
1436850\_at 1.07527 cellular repressor of E1A-stimulated genes 2 Creg2  
1436851\_at 0.99430 prostaglandin E receptor 1 (subtype EP1) /// protein kinase N1 Ptger1 /// Pkn1  
1436852\_at 1.05510 RIKEN cDNA E130308A19 gene E130308A19Rik  
1436853\_a\_at 0.98809 "synuclein, alpha" Snca  
1436854\_at 1.37818 "transient receptor potential cation channel, subfamily C, member 2" Trpc2  
1436855\_at 1.23308 "protein tyrosine phosphatase, receptor type, S" Ptpns  
1436856\_x\_at 0.93791 threonyl-tRNA synthetase-like 1 Tarsl1  
1436857\_at 1.04229 defensin related cryptdin 21 /// defensin related cryptdin 22 Defcr21 /// Defcr22  
1436858\_at 0.95049 muscleblind-like 2 Mbnl2  
1436859\_at 1.01855 RIKEN cDNA 2700007P21 gene 2700007P21Rik  
1436860\_at 1.08609 SUMO1/sentrin specific peptidase 7 Senp7  
1436861\_at 0.99665 interleukin 7 Il7  
1436862\_at 0.78314 "double C2, alpha" Doc2a  
1436863\_at 1.04193 RIKEN cDNA 1700010I14 gene 1700010I14Rik  
1436864\_at 1.12119 RIKEN cDNA A430090L17 gene A430090L17Rik  
1436865\_at 1.05189 "solute carrier family 26, member 11" Slc26a11  
1436866\_at 0.97027 ephrin A5 Efna5  
1436867\_at 0.77982 sarcalumenin /// similar to sarcalumenin Srl /// LOC669709  
1436868\_at 0.67973 reticulon 4 receptor-like 1 Rtn4rl1  
1436869\_at 0.87096 sonic hedgehog Shh  
1436870\_s\_at 0.97095 expressed sequence AU041783 AU041783  
1436871\_at 0.99326 "splicing factor, arginine/serine-rich 7" Sfrs7  
1436872\_at 1.27988 "transforming, acidic coiled-coil containing protein 3" Tacc3  
1436873\_at 1.00777 RIKEN cDNA 4732454E20 gene 4732454E20Rik  
1436874\_x\_at 1.07056 "solute carrier family 25 (mitochondrial carrier, adenine nucleotide translocator), member 5" Slc25a5  
1436875\_at 0.95973 dynamin 3 Dnm3  
1436876\_at 1.07421 "DNA segment, Chr 13, Brigham & Women's Genetics 1146 expressed" D13Bwg1146e

1436877\_at 1.05061 leucine-rich repeats and calponin homology (CH) domain containing 2 Lrch2  
1436878\_at 1.06969 "brain and acute leukemia, cytoplasmic" Baalc  
1436879\_x\_at 1.12743 alpha fetoprotein Afp  
1436880\_at 1.07788 Alpha fetoprotein Afp  
1436881\_x\_at 1.09270 alpha fetoprotein Afp  
1436882\_at 1.02958 ubiquitin-like 5 /// similar to ubiquitin-like 5 /// similar to ubiquitin-like 5  
Ub15 /// LOC435336 /// LOC673926  
1436883\_at 0.97740 "membrane-bound transcription factor peptidase, site 2" Mbtps2  
1436884\_x\_at 0.89669 Ewing sarcoma breakpoint region 1 Ewsr1  
1436885\_a\_at 0.91503 calcium homeostasis endoplasmic reticulum protein Cherp  
1436886\_x\_at 0.96302 XPA binding protein 2 Xab2  
1436887\_x\_at 0.87277 glutamate-rich WD repeat containing 1 Grwd1  
1436888\_at 0.88997 nescient helix loop helix 2 Nhlh2  
1436889\_at 0.99957 "gamma-aminobutyric acid (GABA-A) receptor, subunit alpha 1" Gabra1  
1436890\_at 1.23192 UDP-N-acteylglucosamine pyrophosphorylase 1-like 1 Uap111  
1436891\_at 1.08673 ubiquitin specific peptidase 15 Usp15  
1436892\_at 1.43486 "sprouty-related, EVH1 domain containing 2" Spred2  
1436893\_a\_at 0.96964 membrane-associated ring finger (C3HC4) 7 7-Mar  
1436894\_at 1.17804 "DNA segment, Chr 1, ERATO Doi 471, expressed" D1Ertd471e  
1436895\_at 0.96130 "centaurin, delta 1" Centd1  
1436896\_at 0.93699 "DNA segment, Chr 14, ERATO Doi 231, expressed" D14Ertd231e  
1436897\_at 0.99920 malignant fibrous histiocytoma amplified sequence 1 Mfhas1  
1436898\_at 1.38226 splicing factor proline/glutamine rich (polypyrimidine tract binding protein associated) Sfpq  
1436899\_at 0.89700 RIKEN cDNA 2700019D07 gene 2700019D07Rik  
1436900\_x\_at 0.87628 leptin receptor overlapping transcript Leprot  
1436901\_at 1.07153 "Mammary gland RCB-0526 Jyg-MC(A) cDNA, RIKEN full-length enriched library, clone:G830022P11 product:unclassifiable, full insert sequence /// Notch gene homolog 4 (Drosophila)" Notch4  
1436902\_x\_at 1.09601 "thymosin, beta 10" Tmsb10  
1436903\_at 1.00168 ubiquilin 3 Ubqln3  
1436904\_at 1.10611 thyroid hormone receptor associated protein 1 Thrapp1  
1436905\_x\_at 1.06087 lysosomal-associated protein transmembrane 5 Laptm5  
1436906\_at 0.95074 ring finger protein 166 Rnf166  
1436907\_at 0.97002 neuron navigator 1 Nav1  
1436908\_at 0.89330 pericentriolar material 1 Pcm1  
1436909\_at 0.96177 RIKEN cDNA B430110G05 gene B430110G05Rik  
1436910\_at 1.06948 RAS protein activator like 2 Rasal2  
1436911\_at 0.94982 synovial sarcoma translocation gene on chromosome 18-like 1 Ss1811  
1436912\_at 0.89390 "calcium channel, voltage-dependent, beta 4 subunit" Cacnb4  
1436913\_at 1.04156 CDC14 cell division cycle 14 homolog A (S. cerevisiae) Cdc14a  
1436914\_at 1.08061 "CTD (carboxy-terminal domain, RNA polymerase II, polypeptide A) small phosphatase like 2" Ctdspl2

1436915\_x\_at 0.91202 lysosomal-associated protein transmembrane 4B Laptm4b  
1436916\_at 1.04196 transmembrane protein 108 Tmem108  
1436917\_s\_at 0.84436 "G-protein signalling modulator 1 (AGS3-like, C. elegans)" Gpsm1  
1436918\_at 1.07211 dual-specificity tyrosine-(Y)-phosphorylation regulated kinase 2 Dyrk2  
1436919\_at 1.00126 Trp53 inducible protein 11 Trp53i11  
1436920\_at 1.08564 protocadherin 17 Pcdh17  
1436921\_at 0.92113 "ATPase, Cu++ transporting, alpha polypeptide" Atp7a  
1436922\_at 0.95552 peptidylprolyl isomerase (cyclophilin) like 5 Ppil5  
1436923\_at 1.18110 "RAB2B, member RAS oncogene family" Rab2b  
1436924\_x\_at 0.99746 ERO1-like (S. cerevisiae) /// ribosomal protein L31 /// similar to ribosomal  
protein L31 /// similar to ribosomal protein L31 /// similar to ribosomal protein L31 /// similar to  
ribosomal protein L31 /// similar to ribosomal protein L31 /// similar to ribosomal protein L31 /// similar  
to ribosomal protein L31 /// similar to ribosomal protein L31 /// similar to ribosomal protein L31 ///  
similar to ribosomal protein L31 /// similar to ribosomal protein L31 /// similar to ribosomal protein  
L31 /// similar to ribosomal protein L31 /// similar to ribosomal protein L31 Ero11 /// Rpl31 ///  
LOC544868 /// LOC632618 /// LOC638193 /// LOC638399 /// LOC665533 /// LOC665562 ///  
LOC667682 /// LOC668850 /// LOC670050 /// LOC670381 /// LOC671205 /// LOC672957 ///  
LOC673582 /// LOC676592  
1436925\_at 0.92765 checkpoint suppressor 1 Ches1  
1436926\_at 0.98895 "estrogen related receptor, beta" Esrrb  
1436927\_at 0.94586 cysteine-rich perinuclear theca 4 /// cysteine-rich perinuclear theca 9 /// cysteine-  
rich perinuclear theca 10 Cypt4 /// Cypt9 /// Cypt10  
1436928\_s\_at 0.95479 adenylate cyclase 3 Adcy3  
1436929\_x\_at 0.77456 adenylate cyclase 3 Adcy3  
1436930\_x\_at 1.02362 hydroxymethylbilane synthase /// similar to hydroxymethylbilane synthase ///  
similar to hydroxymethylbilane synthase Hmbs /// LOC623818 /// LOC639157  
1436931\_at 0.97237 "regulatory factor X, 4 (influences HLA class II expression)" Rfx4  
1436932\_at 0.89566 grainyhead-like 3 (Drosophila) Grhl3  
1436933\_at 2.29424 A kinase (PRKA) anchor protein 13 Akap13  
1436934\_s\_at 0.84711 "aconitase 2, mitochondrial" Aco2  
1436935\_x\_at 1.06701 "chloride channel, nucleotide-sensitive, 1A" Clns1a  
1436936\_s\_at 1.16079 inactive X specific transcripts Xist  
1436937\_at 0.88123 "RNA binding motif, single stranded interacting protein" Rbms3  
1436938\_at 0.90402 "RNA binding motif, single stranded interacting protein" Rbms3  
1436939\_at 0.92535 unc-45 homolog B (C. elegans) Unc45b  
1436940\_at 0.89051 Purine rich element binding protein B Purb  
1436941\_at 1.00643 "gene model 1752, (NCBI)" Gm1752  
1436942\_at 0.93531 RIKEN cDNA A930035D04 gene A930035D04Rik  
1436943\_at 0.77135 cytochrome b5 domain containing 2 Cyb5d2  
1436944\_x\_at 0.85380 RIKEN cDNA 4933439C20 gene 4933439C20Rik  
1436945\_x\_at 0.98627 stromal interaction molecule 1 Stim1  
1436946\_s\_at 0.95935 "guanine nucleotide binding protein (G protein), gamma 5 subunit" Gng5  
1436947\_a\_at 1.01628 thioredoxin-like 1 Txnl1

1436948\_a\_at 0.93555 RIKEN cDNA 6430550H21 gene 6430550H21Rik  
 1436949\_a\_at 0.96541 "transcription elongation factor B (SIII), polypeptide 2 /// similar to transcription elongation factor B (SIII), polypeptide 2 /// similar to transcription elongation factor B (SIII), polypeptide 2" Tceb2 /// LOC668554 /// LOC671613  
 1436950\_at 1.03007 v-crk sarcoma virus CT10 oncogene homolog (avian)-like Crkl  
 1436951\_x\_at 1.03417 thioredoxin domain containing 9 Txndc9  
 1436952\_at 0.88131 Kruppel-like factor 9 Klf9  
 1436953\_at 0.78490 Wiskott-Aldrich syndrome protein interacting protein Waspip  
 1436954\_at 0.82303 Wiskott-Aldrich syndrome protein interacting protein Waspip  
 1436955\_at 0.95601 tumor suppressing subtransferable candidate 1 Tssc1  
 1436956\_at 1.00575 Beta-site APP cleaving enzyme 1 Bace1  
 1436957\_at 0.96777 "Gamma-aminobutyric acid (GABA-A) receptor, subunit alpha 3" Gabra3  
 1436958\_x\_at 0.98126 "Tropomyosin 3, gamma" Tpm3  
 1436959\_x\_at 0.83434 nasal embryonic LHRH factor Nelf  
 1436960\_at 0.87460 bromodomain containing 3 Brd3  
 1436961\_at 0.89650 heat shock protein 12A Hspa12a  
 1436962\_at 0.99119 PR domain containing 6 Prdm6  
 1436963\_x\_at 0.88269 RIKEN cDNA 1810059G22 gene 1810059G22Rik  
 1436964\_at 0.98753 "DNA segment, Chr 7, ERATO Doi 715, expressed" D7Ertd715e  
 1436965\_at 0.93181 elastin microfibril interfacier 3 Emilin3  
 1436966\_at 0.97790 pellino 2 Peli2  
 1436967\_at 2.03524 ankyrin repeat domain 11 Ankrd11  
 1436968\_x\_at 0.80364 kelch-like 24 (Drosophila) Klhl24  
 1436969\_at 1.02500 RIKEN cDNA 1700013E18 gene 1700013E18Rik  
 1436970\_a\_at 0.93011 "platelet derived growth factor receptor, beta polypeptide" Pdgfrb  
 1436971\_x\_at 1.09709 "tyrosine 3-monooxygenase/tryptophan 5-monooxygenase activation protein, zeta polypeptide" Ywhaz  
 1436972\_at 0.95176 G protein-coupled receptor 61 Gpr61  
 1436973\_at 1.03266 chaperonin subunit 8 (theta) Cct8  
 1436974\_at 1.14625 RIKEN cDNA A230069A22 gene A230069A22Rik  
 1436975\_at 0.97223 "Gene model 24, (NCBI)" Gm24  
 1436976\_a\_at 1.10067 RIKEN cDNA 9930028C20 gene 9930028C20Rik  
 1436977\_at 1.26976 Epidermal growth factor receptor pathway substrate 8 Eps8  
 1436978\_at 1.11090 wingless-type MMTV integration site 9A Wnt9a  
 1436979\_x\_at 1.08334 RNA binding motif protein 14 Rbm14  
 1436980\_x\_at 1.03527 "CCR4-NOT transcription complex, subunit 2" Cnot2  
 1436981\_a\_at 0.87813 "tyrosine 3-monooxygenase/tryptophan 5-monooxygenase activation protein, zeta polypeptide" Ywhaz  
 1436982\_at 0.96889 trinucleotide repeat containing 6b Tnrc6b  
 1436983\_at 0.93891 CREB binding protein Crebbp  
 1436984\_at 0.99641 abl-interactor 2 Abi2  
 1436985\_at 0.93790 zinc finger protein 644 Zfp644  
 1436986\_at 1.04530 "syntrophin, basic 2" Sntb2

1436987\_at 0.91612 RIKEN cDNA 5430433G21 gene 5430433G21Rik  
1436988\_at 1.08589 RIKEN cDNA 5430433G21 gene 5430433G21Rik  
1436989\_s\_at 0.91605 "solute carrier family 12, member 6" Slc12a6  
1436990\_s\_at 0.77539 Nur77 downstream gene 2 Ndg2  
1436991\_x\_at 0.86990 gelsolin Gsn  
1436992\_x\_at 0.96216 voltage-dependent anion channel 1 Vdac1  
1436993\_x\_at 0.82141 profilin 2 Pfn2  
1436994\_a\_at 1.36289 "histone 1, H1c" Hist1h1c  
1436995\_a\_at 1.05476 ribosomal protein L26 Rpl26  
1436996\_x\_at 0.94201 P lysozyme structural Lzp-s  
1436997\_x\_at 0.82302 SH3-binding domain glutamic acid-rich protein like Sh3bgrl  
1436998\_at 1.03594 ankyrin repeat domain 43 Ankrd43  
1436999\_at 0.67876 RIKEN cDNA 5033414K04 gene 5033414K04Rik  
1437000\_at 1.00044 "diacylglycerol kinase, theta" Dgkq  
1437001\_at 1.01590 glycogen synthase kinase 3 beta Gsk3b  
1437002\_at 0.94964 RIKEN cDNA C030011O14 gene C030011O14Rik  
1437003\_at 1.00029 --- ---  
1437004\_at 0.95797 similar to tripartite motif-containing 43 LOC547109  
1437005\_a\_at 1.06933 ribosomal protein L18 Rpl18  
1437006\_x\_at 0.95375 "beclin 1 (coiled-coil, myosin-like BCL2-interacting protein)" Becn1  
1437007\_x\_at 1.00064 ubiquitin specific peptidase 39 Usp39  
1437008\_x\_at 1.00160 transmembrane protein 109 Tmem109  
1437009\_a\_at 0.93577 zinc finger protein 364 Zfp364  
1437010\_a\_at 1.02255 ornithine decarboxylase antizyme 3 Oaz3  
1437011\_x\_at 0.89919 ornithine decarboxylase antizyme 3 Oaz3  
1437012\_x\_at 1.26243 Rap guanine nucleotide exchange factor (GEF) 3 Rapgef3  
1437013\_x\_at 0.96061 "ATPase, H+ transporting, lysosomal V0 subunit B" Atp6v0b  
1437014\_x\_at 0.98453 similar to Peroxiredoxin 1 (Thioredoxin peroxidase 2) (Thioredoxin-dependent peroxide reductase 2) (Osteoblast specific factor 3) (OSF-3) (Macrophage 23 kDa stress protein) /// similar to Peroxiredoxin-1 (Thioredoxin peroxidase 2) (Thioredoxin-dependent peroxide reductase 2) (Osteoblast-specific factor 3) (OSF-3) (Macrophage 23 kDa stress protein) LOC545161 /// LOC637273  
1437015\_x\_at 1.00854 "phospholipase A2, group IB, pancreas" Pla2g1b  
1437016\_x\_at 0.96367 "RAP2C, member of RAS oncogene family" Rap2c  
1437017\_at 0.97604 expressed sequence AI480653 AI480653  
1437018\_at 1.08757 paraneoplastic antigen MA2 Pnma2  
1437019\_at 0.91634 RIKEN cDNA 2200001I15 gene 2200001I15Rik  
1437020\_at 1.03565 E1A binding protein p400 Ep400  
1437021\_at 1.04496 ADP-ribosylation factor-like 13B Arl13b  
1437022\_at 1.13003 RIKEN cDNA D130059P03 gene D130059P03Rik  
1437023\_at 1.05608 zinc finger protein 12 Zfp12  
1437024\_at 0.84772 sphingomyelin phosphodiesterase 4 Smpd4  
1437025\_at 0.92531 CD28 antigen Cd28

1437026\_at 0.95616 cDNA sequence BC057893 BC057893  
1437027\_x\_at 1.01201 ribonucleic acid binding protein S1 Rnps1  
1437028\_at 0.99898 surfactant associated protein B Sftpb  
1437029\_at 1.06743 tachykinin receptor 3 Tacr3  
1437030\_at 1.06423 "phospholipase C, delta 4" Plcd4  
1437031\_at 1.05651 Acyl-CoA synthetase long-chain family member 6 Acsl6  
1437032\_x\_at 0.99954 RNA binding motif protein 14 Rbm14  
1437033\_a\_at 1.11551 S-phase kinase-associated protein 2 (p45) Skp2  
1437034\_x\_at 0.95075 myristoylated alanine rich protein kinase C substrate Marcks  
1437035\_x\_at 1.09672 ring finger protein 14 Rnf14  
1437036\_at 0.95573 Expressed sequence AL033314 AL033314  
1437037\_x\_at 1.06037 expressed sequence AL033314 AL033314  
1437038\_x\_at 1.04185 RIKEN cDNA 1700029I08 gene 1700029I08Rik  
1437039\_at 1.09782 "COP9 (constitutive photomorphogenic) homolog, subunit 2 (Arabidopsis thaliana)" Cops2  
1437040\_at 0.93090 ethanolamine kinase 2 Etnk2  
1437041\_at 0.74601 RIKEN cDNA 5730406M06 gene 5730406M06Rik  
1437042\_at 0.96342 aryl hydrocarbon receptor nuclear translocator Arnt  
1437043\_a\_at 1.03418 RIKEN cDNA 1110012M11 gene 1110012M11Rik  
1437044\_a\_at 1.11246 "glucosidase, beta, acid" Gba  
1437045\_at 1.46899 mitogen activated protein kinase 8 Mapk8  
1437046\_x\_at 0.89183 RIKEN cDNA 4930504E06 gene 4930504E06Rik  
1437047\_at 0.97526 zinc finger protein 664 Zfp664  
1437048\_x\_at 0.98041 syntaxin binding protein 2 Stxbp2  
1437049\_at 1.00895 Transcribed locus ---  
1437050\_s\_at 0.89276 angel homolog 2 (Drosophila) Angel2  
1437051\_at 0.94786 "DNA fragmentation factor, beta subunit" Dffb  
1437052\_s\_at 1.08266 "solute carrier family 2 (facilitated glucose transporter), member 3" Slc2a3  
1437053\_x\_at 1.07054 apoptosis inhibitor 5 Api5  
1437054\_x\_at 0.99530 protamine 1 Prm1  
1437055\_x\_at 1.13170 Major facilitator superfamily domain containing 1 Mfsd1  
1437056\_x\_at 1.02519 cysteine-rich secretory protein LCCL domain containing 2 Crisp1d2  
1437057\_at 0.68338 multiple EGF-like-domains 6 Megf6  
1437058\_at 0.71382 multiple EGF-like-domains 6 Megf6  
1437059\_at 1.06134 SRY-box containing gene 21 Sox21  
1437060\_at 1.02564 olfactomedin 4 Olfm4  
1437061\_at 1.03908 methyl-CpG binding domain protein 1 Mbd1  
1437062\_s\_at 1.06230 phytanoyl-CoA hydroxylase interacting protein-like Phyh1pl  
1437063\_at 0.88680 feminization 1 homolog a (C. elegans) Fem1a  
1437064\_at 0.96313 androgen receptor Ar  
1437065\_at 0.95612 zinc finger and BTB domain containing 20 Zbtb20  
1437066\_at 1.07108 zinc finger and BTB domain containing 20 Zbtb20  
1437067\_at 0.95563 putative homeodomain transcription factor 2 Phtf2

1437068\_at 1.18314 SoxLZ/Sox6 leucine zipper binding protein in testis Solt  
1437069\_at 1.09201 oxysterol binding protein-like 8 Osbp18  
1437070\_at 1.11048 CDC14 cell division cycle 14 homolog B (S. cerevisiae) Cdc14b  
1437071\_at 0.88995 "eukaryotic translation initiation factor 1A, Y-linked" Eif1ay  
1437072\_at 0.88371 Rho GTPase activating protein 25 Arhgap25  
1437073\_x\_at 0.89792 expressed sequence AV025504 AV025504  
1437074\_at 1.76592 sorting nexin 5 Snx5  
1437075\_at 1.03081 FERM domain containing 3 Frmd3  
1437076\_at 1.03023 RIKEN cDNA A930017M01 gene A930017M01Rik  
1437077\_at 0.96964 expressed sequence AW495713 AW495713  
1437078\_at 0.92535 similar to vacuolar protein sorting 52 LOC631721  
1437079\_at 0.89786 "solute carrier family 18 (vesicular monoamine), member 2" Slc18a2  
1437080\_s\_at 1.11923 "proteasome (prosome, macropain) 26S subunit, non-ATPase, 11 /// similar to  
26S proteasome non-ATPase regulatory subunit 11 (26S proteasome regulatory subunit S9) (26S  
proteasome regulatory subunit p44.5) /// similar to 26S proteasome non-ATPase regulatory subunit 11  
(26S proteasome regulatory subunit S9) (26S proteasome regulatory subunit p44.5)" Psm11 ///  
LOC627316 /// LOC671671  
1437081\_at 0.93877 Tissue inhibitor of metalloproteinase 2 Timp2  
1437082\_at 0.89212 A kinase (PRKA) anchor protein (yotiao) 9 Akap9  
1437083\_at 1.05020 RIKEN cDNA A830020B06 gene A830020B06Rik  
1437084\_at 1.00109 "peptidyl arginine deiminase, type VI" Padi6  
1437085\_at 0.96042 RIKEN cDNA D630039A03 gene D630039A03Rik  
1437086\_at 1.11655 achaete-scute complex homolog-like 1 (Drosophila) Ascl1  
1437087\_at 0.98501 --- ---  
1437088\_at 1.19297 SDA1 domain containing 1 Sdad1  
1437089\_at 0.94418 RIKEN cDNA 4833409A17 gene 4833409A17Rik  
1437090\_at 1.12187 coiled-coil domain containing 63 Ccdc63  
1437091\_at 1.12426 "amiloride-sensitive cation channel 4, pituitary" Accn4  
1437092\_at 1.16826 restin-like 2 Rsnl2  
1437093\_at 0.96283 "dynein, axonemal, intermediate chain 1" Dnaic1  
1437094\_x\_at 1.02841 "dynein, axonemal, intermediate chain 1" Dnaic1  
1437095\_at 0.94178 tetraspanin 18 Tspan18  
1437096\_at 1.02189 tetratricopeptide repeat domain 29 Ttc29  
1437097\_at 0.84040 "zinc finger, BED domain containing 3" Zbed3  
1437098\_x\_at 1.06955 Transcribed locus ---  
1437099\_x\_at 1.04515 heterogeneous nuclear ribonucleoprotein F /// similar to heterogeneous nuclear  
ribonucleoprotein F /// similar to heterogeneous nuclear ribonucleoprotein F /// similar to heterogeneous  
nuclear ribonucleoprotein F Hnrpf /// LOC637008 /// LOC665008 /// LOC672616  
1437100\_x\_at 1.05849 proviral integration site 3 Pim3  
1437101\_at 1.12645 large tumor suppressor 2 Lats2  
1437102\_at 0.94145 YTH domain family 1 Ythdf1  
1437103\_at 1.26803 insulin-like growth factor 2 mRNA binding protein 2 Igf2bp2  
1437104\_at 0.94608 ADP-ribosylation factor guanine nucleotide-exchange factor 1(brefeldin A-

inhibited) Arfgef1

1437105\_at 0.94739 "jumonji, AT rich interactive domain 1A (Rbp2 like)" Jarid1a

1437106\_at 0.88597 "jumonji, AT rich interactive domain 1A (Rbp2 like)" Jarid1a

1437107\_at 1.00957 "RAB6B, member RAS oncogene family" Rab6b

1437108\_at 0.97354 "LSM6 homolog, U6 small nuclear RNA associated (S. cerevisiae)" Lsm6

1437109\_s\_at 1.05855 "LSM6 homolog, U6 small nuclear RNA associated (S. cerevisiae)" Lsm6

1437110\_at 0.99201 RIKEN cDNA 2810474O19 gene 2810474O19Rik

1437111\_at 1.11769 zinc finger CCCH type containing 12C Zc3h12c

1437112\_at 0.95496 phospholipase D1 Pld1

1437113\_s\_at 0.96987 phospholipase D1 Pld1

1437114\_at 1.10723 RIKEN cDNA A930001N09 gene A930001N09Rik

1437115\_at 1.09916 expressed sequence AA673488 AA673488

1437116\_at 1.13906 LETM1 domain containing 1 Letmd1

1437117\_at 0.89776 "centaurin, beta 1" Centb1

1437118\_at 0.89909 ubiquitin specific peptidase 7 Usp7

1437119\_at 1.23136 Endoplasmic reticulum (ER) to nucleus signalling 1 Ern1

1437120\_at 1.02471 sorting nexin family member 30 Snx30

1437121\_at 0.90323 DENN/MADD domain containing 1C Dennd1c

1437122\_at 0.90548 B-cell leukemia/lymphoma 2 Bcl2

1437123\_at 0.96251 multimerin 2 Mmrn2

1437124\_at 1.02223 RIKEN cDNA A630052C17 gene A630052C17Rik

1437125\_at 1.01959 calcium/calmodulin-dependent protein kinase II alpha Camk2a

1437126\_at 1.45811 "Inner membrane protein, mitochondrial" Immt

1437127\_at 1.08500 RIKEN cDNA A630033E08 gene A630033E08Rik

1437128\_a\_at 0.84902 RIKEN cDNA A630033E08 gene A630033E08Rik

1437129\_at 1.18242 RIKEN cDNA E330018D03 gene E330018D03Rik

1437130\_at 1.01365 similar to Kelch repeat and BTB (POZ) domain containing 7 (predicted)

LOC432879

1437131\_x\_at 0.98220 mitochondrial ribosomal protein L11 Mrpl11

1437132\_x\_at 0.84330 "neural precursor cell expressed, developmentally down-regulated gene 9" Nedd9

1437133\_x\_at 1.04449 "aldo-keto reductase family 1, member B3 (aldose reductase)" Akr1b3

1437134\_at 0.98915 "Ubiquinol-cytochrome c reductase, complex III subunit VII" Uqcrcq

1437135\_at 1.01165 F-box and WD-40 domain protein 10 Fbxw10

1437136\_at 1.30868 RIKEN cDNA 5830436I19 gene 5830436I19Rik

1437137\_at 1.07172 RIKEN cDNA 6430550H21 gene 6430550H21Rik

1437138\_at 0.98663 forkhead box M1 Foxm1

1437139\_at 1.01230 "glycine receptor, alpha 1 subunit" Glra1

1437140\_at 1.04311 RIKEN cDNA 4930412F15 gene 4930412F15Rik

1437141\_x\_at 0.92569 dymeclin Dym

1437142\_a\_at 0.94586 "phosphatidylinositol glycan anchor biosynthesis, class O" Pigo

1437143\_a\_at 0.90724 thioredoxin domain containing 1 Txndc1

1437144\_x\_at 1.11729 "proteasome (prosome, macropain) subunit, alpha type 6" Psma6



1437145\_s\_at 1.01306 RIKEN cDNA 2310002J15 gene 2310002J15Rik  
 1437146\_x\_at 1.01083 coronin 7 Coro7  
 1437147\_at 0.99190 "gamma-aminobutyric acid (GABA-A) receptor, subunit gamma 2" Gabrg2  
 1437148\_at 0.97736 "actin related protein 2/3 complex, subunit 2" Arpc2  
 1437149\_at 1.09358 "solute carrier family 6 (neurotransmitter transporter, taurine), member 6" Slc6a6  
 1437150\_at 1.18427 RIKEN cDNA 1700012H17 gene 1700012H17Rik  
 1437151\_at 0.96781 ubiquitin specific peptidase 22 Usp22  
 1437152\_at 0.64636 ring finger and KH domain containing 3 Rkhd3  
 1437153\_at 1.16367 similar to Oogenesis 2 /// oogenesis 2 MGC91195 /// Oog2  
 1437154\_at 1.12094 centrosomal protein 170 Cep170  
 1437155\_a\_at 0.87858 WW domain containing transcription regulator 1 Wwtr1  
 1437156\_at 0.97507 EF hand calcium binding protein 1 Efcfbp1  
 1437157\_at 0.96402 "ATPase, Na<sup>+</sup>/K<sup>+</sup> transporting, beta 1 polypeptide" Atp1b1  
 1437158\_at 1.13267 Nipped-B homolog (Drosophila) Nipbl  
 1437159\_at 1.01929 --- ---  
 1437160\_at 1.02692 neuroligin 1 Nlgn1  
 1437161\_x\_at 0.92389 RNA binding protein gene with multiple splicing Rbpms  
 1437162\_at 2.42987 GPI-anchored membrane protein 1 Gpiap1  
 1437163\_x\_at 0.96902 "general transcription factor II H, polypeptide 4" Gtf2h4  
 1437164\_x\_at 0.86153 "ATP synthase, H<sup>+</sup> transporting, mitochondrial F1 complex, O subunit /// similar to ATP synthase, H<sup>+</sup> transporting, mitochondrial F1 complex, O subunit" Atp5o /// LOC432676  
 1437165\_a\_at 0.92036 procollagen C-endopeptidase enhancer protein Pcolce  
 1437166\_at 0.85616 Terf1 (TRF1)-interacting nuclear factor 2 Tinf2  
 1437167\_at 0.99361 tropomodulin 2 Tmod2  
 1437168\_at 1.03896 serine-arginine repressor protein Srrp  
 1437169\_at 1.07488 PDZ and LIM domain 1 (elfin) /// similar to PDZ and LIM domain protein 1 (Elfin) (LIM domain protein CLP-36) (C-terminal LIM domain protein 1) Pdlim1 /// LOC545743  
 1437170\_x\_at 0.99843 PDZ and LIM domain 1 (elfin) /// similar to PDZ and LIM domain protein 1 (Elfin) (LIM domain protein CLP-36) (C-terminal LIM domain protein 1) Pdlim1 /// LOC545743  
 1437171\_x\_at 0.86202 gelsolin Gsn  
 1437172\_x\_at 0.85460 "hydroxyacyl-Coenzyme A dehydrogenase/3-ketoacyl-Coenzyme A thiolase/enoyl-Coenzyme A hydratase (trifunctional protein), beta subunit" Hadhb  
 1437173\_at 0.95926 "endothelial differentiation, sphingolipid G-protein-coupled receptor, 3" Edg3  
 1437174\_at 0.99437 transcription factor Dp 2 Tfdp2  
 1437175\_at 0.98883 PDLIM1 interacting kinase 1 like Pdik11  
 1437176\_at 1.46318 expressed sequence AI451557 AI451557  
 1437177\_at 1.25123 RIKEN cDNA D330037H05 gene /// similar to La-related protein 4 (La ribonucleoprotein domain family member 4) /// similar to La-related protein 4 (La ribonucleoprotein domain family member 4) /// similar to La-related protein 4 (La ribonucleoprotein domain family member 4) D330037H05Rik /// LOC669298 /// LOC673040 /// LOC677019  
 1437178\_at 0.91903 hypothetical LOC631105 LOC631105

1437179\_at 1.16076 Rap1 interacting factor 1 homolog (yeast) /// similar to Telomere-associated protein RIF1 (Rap1-interacting factor 1 homolog) (mRif1) Rif1 /// LOC671598  
1437180\_at 1.43111 RIKEN cDNA 6530403A03 gene 6530403A03Rik  
1437181\_at 0.57541 pellino 2 Peli2  
1437182\_at 1.42806 death inducer-obliterator 1 Dido1  
1437183\_at 1.10632 leucine rich repeat containing 4B Lrrc4b  
1437184\_at 1.10140 GUF1 GTPase homolog (S. cerevisiae) Guf1  
1437185\_s\_at 1.01276 "thymosin, beta 10" Tmsb10  
1437186\_at 1.16833 cDNA sequence BC055324 BC055324  
1437187\_at 0.97856 E2F transcription factor 7 E2f7  
1437188\_at 0.86414 "gamma-aminobutyric acid (GABA-B) receptor, 1" Gabbr1  
1437189\_x\_at 1.08156 dendritic cell protein GA17 Ga17  
1437190\_at 1.10247 serine/threonine/tyrosine kinase 1 Styk1  
1437191\_at 1.01173 cDNA sequence BC050789 BC050789  
1437192\_x\_at 0.94161 voltage-dependent anion channel 1 Vdac1  
1437193\_s\_at 1.02703 small nuclear ribonucleoprotein B Snrpb  
1437194\_x\_at 0.97886 RIKEN cDNA 1200011O22 gene 1200011O22Rik  
1437195\_x\_at 0.87296 mitogen activated protein kinase 10 Mapk10  
1437196\_x\_at 0.99642 ribosomal protein S16 Rps16  
1437197\_at 0.83179 sorbin and SH3 domain containing 2 Sorbs2  
1437198\_at 0.92281 "ligase III, DNA, ATP-dependent" Lig3  
1437199\_at 0.75012 dual specificity phosphatase 5 Dusp5  
1437200\_at 0.95796 FCH domain only 2 Fcho2  
1437201\_at 1.06745 leucine rich repeat containing 4C Lrrc4c  
1437202\_at 1.06517 "myb-like, SWIRM and MPN domains 1" Mysm1  
1437203\_at 1.10513 Casitas B-lineage lymphoma-like 1 Cbl1  
1437204\_a\_at 1.31916 transcription factor 25 (basic helix-loop-helix) Tcf25  
1437205\_at 1.27377 transcription factor 25 (basic helix-loop-helix) Tcf25  
1437206\_at 1.09987 SET domain containing 5 Setd5  
1437207\_at 0.95554 ring finger protein 170 Rnf170  
1437208\_at 0.93713 septin 10 10-Sep  
1437209\_at 1.03643 centrosomal protein 76 Cep76  
1437210\_a\_at 0.97117 bromodomain containing 2 Brd2  
1437211\_x\_at 0.97916 "ELOVL family member 5, elongation of long chain fatty acids (yeast)" Elov15  
1437212\_at 1.06575 RIKEN cDNA B230312I18 gene B230312I18Rik  
1437213\_at 0.95662 nudix (nucleoside diphosphate linked moiety X)-type motif 21 Nudt21  
1437214\_at 0.99344 leucine rich repeat transmembrane neuronal 4 Lrrtm4  
1437215\_at 1.14078 similar to MTH2 protein /// similar to MTH2 protein LOC667026 ///  
LOC671874  
1437216\_at 1.08626 RIKEN cDNA A430106J12 gene A430106J12Rik  
1437217\_at 0.92973 ankyrin repeat domain 6 Ankrd6  
1437218\_at 1.74331 Fibronectin 1 Fn1

1437219\_at 3.25841 Insulin-like growth factor I receptor Igf1r  
1437220\_x\_at 1.10068 "DnaJ (Hsp40) homolog, subfamily A, member 1" Dnaja1  
1437221\_at 1.14808 ribonucleotide reductase M2 B (TP53 inducible) Rrm2b  
1437222\_x\_at 0.95994 ribonucleotide reductase M2 B (TP53 inducible) Rrm2b  
1437223\_s\_at 0.88261 X-box binding protein 1 Xbp1  
1437224\_at 0.72423 reticulon 4 Rtn4  
1437225\_x\_at 0.89846 "guanine nucleotide binding protein, alpha inhibiting 3" Gnai3  
1437226\_x\_at 0.82832 MARCKS-like 1 Marcksl1  
1437227\_at 0.82313 RIKEN cDNA 2900073H19 gene 2900073H19Rik  
1437228\_at 1.19406 cDNA sequence BC048651 BC048651  
1437229\_at 0.94481 "EF hand domain family, member B" Efhb  
1437230\_at 1.16118 "Adult male corpus striatum cDNA, RIKEN full-length enriched library, clone:7630403E16 product:unclassifiable, full insert sequence" ---  
1437231\_at 0.92949 "SLIT and NTRK-like family, member 6" Slitrk6  
1437232\_at 0.78062 bactericidal/permeability-increasing protein-like 2 Bpil2  
1437233\_x\_at 0.95430 RIKEN cDNA 1110049F12 gene 1110049F12Rik  
1437234\_x\_at 0.96999 protein arginine N-methyltransferase 2 Prmt2  
1437235\_x\_at 1.10042 LIM domain containing preferred translocation partner in lipoma Lpp  
1437236\_a\_at 0.76074 zinc finger protein 110 Zfp110  
1437237\_x\_at 0.73556 zinc finger protein 110 Zfp110  
1437238\_x\_at 1.05476 NMD3 homolog (S. cerevisiae) Nmd3  
1437239\_x\_at 1.01025 polyhomeotic-like 2 (Drosophila) Phc2  
1437240\_at 1.45620 phosphoglucomutase 2 Pgm2  
1437241\_at 0.67811 TGFB inducible early growth response 3 Tieg3  
1437242\_at 1.04458 "tubulin tyrosine ligase-like family, member 12" Ttl12  
1437243\_at 1.05845 "D-2-hydroxyglutarate dehydrogenase /// similar to CG3835-PA, isoform A" D2hgdh /// LOC673662  
1437244\_at 1.32340 growth arrest-specific 2 like 3 Gas2l3  
1437245\_at 1.03057 transmembrane protein 154 Tmem154  
1437246\_x\_at 1.09623 ribosomal protein S6 /// similar to 40S ribosomal protein S6 Rps6 /// LOC214738 /// LOC384383 /// LOC545640 /// LOC626259 /// LOC629575 /// LOC638497 /// LOC639593 /// LOC639750 /// LOC666577 /// LOC667739 /// LOC667922 /// LOC671306 /// LOC671432 /// LOC672620 /// LOC675985  
1437247\_at 1.16687 fos-like antigen 2 /// similar to fos-like antigen 2 Fosl2 /// LOC634417  
1437248\_at 0.76921 RIKEN cDNA 2700049A03 gene 2700049A03Rik  
1437249\_at 1.03318 src family associated phosphoprotein 1 Scap1  
1437250\_at 0.82672 melanoregulin Mreg  
1437251\_at 0.99298 cell division cycle associated 2 Cdca2

|              |         |                                                            |               |
|--------------|---------|------------------------------------------------------------|---------------|
| 1437252_at   | 0.76456 | opposite strand transcription unit to Stag3                | Gats          |
| 1437253_at   | 1.01771 | RIKEN cDNA A630054L15 gene                                 | A630054L15Rik |
| 1437254_at   | 0.90243 | centrosomal protein 76                                     | Cep76         |
| 1437255_at   | 1.10553 | Zinc finger and BTB domain containing 7a                   | Zbtb7a        |
| 1437256_at   | 0.98634 | ---                                                        | ---           |
| 1437257_at   | 1.02182 | WD repeat domain 47                                        | Wdr47         |
| 1437258_at   | 0.93296 | small proline-rich protein 2A                              | Sprr2a        |
| 1437259_at   | 0.97177 | ---                                                        | ---           |
| 1437260_at   | 1.05971 | multimerin 1                                               | Mmrn1         |
| 1437261_at   | 1.29092 | RIKEN cDNA 2900024O10 gene                                 | 2900024O10Rik |
| 1437262_x_at | 0.86486 | breast carcinoma amplified sequence 2                      | Bcas2         |
| 1437263_at   | 1.18902 | RIKEN cDNA A730089K16 gene                                 | A730089K16Rik |
| 1437264_at   | 0.82767 | cDNA sequence BC051142                                     | BC051142      |
| 1437265_at   | 0.86689 | RIKEN cDNA 5330438D12 gene                                 | 5330438D12Rik |
| 1437266_at   | 1.00340 | thioredoxin domain containing 2 (spermatzoa)               | Txndc2        |
| 1437267_x_at | 0.99906 | Heterogeneous nuclear ribonucleoprotein H1                 | Hnrph1        |
| 1437268_at   | 0.95450 | LanC lantibiotic synthetase component C-like 3 (bacterial) | Lancl3        |
| 1437269_at   | 1.04319 | expressed sequence AW124722                                | AW124722      |
| 1437270_a_at | 0.90367 | cardiotrophin-like cytokine factor 1                       | Clcf1         |
| 1437271_at   | 0.89115 | cardiotrophin-like cytokine factor 1                       | Clcf1         |
| 1437272_at   | 1.02548 | RIKEN cDNA 4932443J21 gene                                 | 4932443J21Rik |
| 1437273_at   | 0.96129 | HtrA serine peptidase 4                                    | Htra4         |
| 1437274_at   | 0.97478 | coatomer protein complex subunit alpha                     | Copa          |
| 1437275_at   | 0.99152 | "Catenin (cadherin associated protein), alpha 1"           | Ctnna1        |
| 1437276_at   | 1.26212 | Transcribed locus                                          | ---           |
| 1437277_x_at | 0.90403 | "transglutaminase 2, C polypeptide"                        | Tgm2          |
| 1437278_a_at | 0.89689 | ubiquitin-like 1 (sentrin) activating enzyme E1B           | Uble1b        |
| 1437279_x_at | 0.85422 | syndecan 1                                                 | Sdc1          |
| 1437280_s_at | 1.06463 | Serpine1 mRNA binding protein 1                            | Serbp1        |
| 1437281_x_at | 0.99288 | XPA binding protein 2                                      | Xab2          |
| 1437282_at   | 0.98048 | Dedicator of cyto-kinesis 2                                | Dock2         |
| 1437283_at   | 1.08197 | "transportin 2 (importin 3, karyopherin beta 2b)"          | Tnpo2         |
| 1437284_at   | 1.02130 | frizzled homolog 1 (Drosophila)                            | Fzd1          |
| 1437285_at   | 1.25894 | ---                                                        | ---           |
| 1437286_x_at | 1.03355 | ---                                                        | ---           |
| 1437287_at   | 1.06161 | RIKEN cDNA 1110020G09 gene                                 | 1110020G09Rik |
| 1437288_at   | 0.93053 | inositol monophosphatase domain containing 1               | Impad1        |
| 1437289_at   | 1.01792 | inositol monophosphatase domain containing 1               | Impad1        |
| 1437290_at   | 0.91123 | inositol monophosphatase domain containing 1               | Impad1        |
| 1437291_at   | 0.89006 | RIKEN cDNA 2700081O15 gene                                 | 2700081O15Rik |
| 1437292_at   | 1.06300 | RIKEN cDNA A330019N05 gene                                 | A330019N05Rik |
| 1437293_x_at | 0.95290 | uronyl-2-sulfotransferase                                  | Ust           |
| 1437294_at   | 1.03227 | exosome component 10                                       | Exosc10       |

1437295\_at 1.04903 protein kinase N2 Pkn2  
1437296\_at 1.15538 protein kinase N2 Pkn2  
1437297\_at 0.98219 chromodomain helicase DNA binding protein 8 Chd8  
1437298\_at 0.94625 RIKEN cDNA 5730509C05 gene 5730509C05Rik  
1437299\_at 1.06234 "NACHT, leucine rich repeat and PYD containing 4F" Nalp4f  
1437300\_at 1.05256 myocyte enhancer factor 2D Mef2d  
1437301\_a\_at 1.28570 "dishevelled, dsh homolog 1 (Drosophila)" Dvl1  
1437302\_at 0.95267 "adrenergic receptor, beta 2" Adrb2  
1437303\_at 1.10386 interleukin 6 signal transducer Il6st  
1437304\_at 0.84445 Casitas B-lineage lymphoma b Cblb  
1437305\_at 1.14636 RIKEN cDNA 6430601A21 gene 6430601A21Rik  
1437306\_at 0.95614 RIKEN cDNA C130092O11 gene C130092O11Rik  
1437307\_at 0.85720 SUMO/sentrin specific peptidase 8 Senp8  
1437308\_s\_at 0.94514 coagulation factor II (thrombin) receptor F2r  
1437309\_a\_at 0.98167 replication protein A1 Rpa1  
1437310\_at 0.82057 Bardet-Biedl syndrome 1 homolog (human) Bbs1  
1437311\_at 1.03566 RIKEN cDNA A930034L06 gene A930034L06Rik  
1437312\_at 0.95952 "bone morphogenetic protein receptor, type 1B" Bmpr1b  
1437313\_x\_at 1.01580 high mobility group box 2 /// high mobility group box 2 /// high mobility group box 2 Hmgb2 /// LOC678110 /// LOC678341  
1437314\_a\_at 1.04233 TRM1 tRNA methyltransferase 1 homolog (S. cerevisiae) Trmt1  
1437315\_at 0.90119 G protein-coupled receptor 172B Gpr172b  
1437316\_at 1.06785 F-box and WD-40 domain protein 19 Fbxw19  
1437317\_at 1.01616 ubiquitin-activating enzyme E1-like Ube1l  
1437318\_at 1.00970 p21 (CDKN1A)-activated kinase 3 Pak3  
1437319\_at 0.91558 unc-13 homolog C (C. elegans) Unc13c  
1437320\_s\_at 1.20567 "xeroderma pigmentosum, complementation group A" Xpa  
1437321\_at 0.90475 --- ---  
1437322\_at 1.70591 RNA binding motif protein 4 Rbm4  
1437323\_a\_at 0.98696 islet amyloid polypeptide Iapp  
1437324\_x\_at 0.59765 fibromodulin Fmod  
1437325\_x\_at 0.98405 "aldehyde dehydrogenase 18 family, member A1" Aldh18a1  
1437326\_x\_at 1.05306 "elastase 3, pancreatic /// similar to elastase 3B, pancreatic" Ela3 /// LOC638418  
1437327\_x\_at 1.00562 RIKEN cDNA 2310057D15 gene 2310057D15Rik  
1437328\_x\_at 0.97405 cleavage and polyadenylation specificity factor 3 Cpsf3  
1437329\_at 1.01371 "protein tyrosine phosphatase-like (proline instead of catalytic arginine), member b" Ptplb  
1437330\_at 0.80765 leucine-rich repeat kinase 1 Lrrk1  
1437331\_a\_at 1.00518 ADP-ribosylation factor 3 Arf3  
1437332\_at 0.97484 "Adult male corpora quadrigemina cDNA, RIKEN full-length enriched library, clone:B230334A10 product:unclassifiable, full insert sequence" ---  
1437333\_x\_at 0.96581 "aldehyde dehydrogenase 18 family, member A1" Aldh18a1

1437334\_x\_at 0.84681 poly(A)-specific ribonuclease (deadenylation nuclease) Parn  
1437335\_x\_at 0.95816 "polymerase (DNA-directed), delta interacting protein 3" Poldip3  
1437336\_x\_at 1.10474 RIKEN cDNA 1110002E23 gene 1110002E23Rik  
1437337\_x\_at 0.95460 fucokinase Fuk  
1437338\_x\_at 0.90147 Elongation protein 3 homolog (*S. cerevisiae*) Elp3  
1437339\_s\_at 0.94425 proprotein convertase subtilisin/kexin type 5 Pcsk5  
1437340\_x\_at 1.06036 gastroke 1 Gkn1  
1437341\_x\_at 0.84547 cyclic nucleotide phosphodiesterase 1 Cnp1  
1437342\_x\_at 1.05060 pituitary tumor-transforming 1 interacting protein Pttg1ip  
1437343\_x\_at 1.12987 "ATPase family, AAA domain containing 3A" Atad3a  
1437344\_x\_at 1.00258 --- ---  
1437345\_a\_at 0.96225 Bernardinelli-Seip congenital lipodystrophy 2 homolog (human) Bscl2  
1437346\_x\_at 0.90858 Immunoglobulin heavy chain (J558 family) Igh-VJ558  
1437347\_at 1.00754 endothelin receptor type B Ednrb  
1437348\_at 1.07193 F-box protein 28 Fbxo28  
1437349\_at 1.01879 cytoskeleton associated protein 5 Ckap5  
1437350\_at 0.92357 candidate tumor suppressor OVCA2 RP23-143A14.5  
1437351\_at 0.57307 CXXC finger 4 Cxxc4  
1437352\_at 0.93771 "acyl-Coenzyme A oxidase 3, pristanoyl" Acox3  
1437353\_at 0.91241 SET domain containing 1B Setd1b  
1437354\_at 0.91688 RIKEN cDNA C230091D08 gene C230091D08Rik  
1437355\_at 0.95828 "zinc finger, CCHC domain containing 5" Zcchc5  
1437356\_at 1.00135 Epstein-Barr virus induced gene 2 Ebi2  
1437357\_at 1.09240 YTH domain containing 2 Ythdc2  
1437358\_at 0.83487 WD repeat and FYVE domain containing 1 Wdfy1  
1437359\_at 1.52567 Ribonucleic acid binding protein S1 Rnps1  
1437360\_at 0.84958 protocadherin 19 Pcdh19  
1437361\_at 0.99768 RIKEN cDNA A430060F13 gene A430060F13Rik  
1437362\_at 0.98920 RIKEN cDNA A930028L21 gene A930028L21Rik  
1437363\_at 1.17174 homer homolog 1 (*Drosophila*) Homer1  
1437364\_at 1.00305 "coenzyme Q3 homolog, methyltransferase (yeast)" Coq3  
1437365\_at 1.04645 NOL1/NOP2/Sun domain family 3 Nsun3  
1437366\_at 0.98909 expressed sequence AI608492 AI608492  
1437367\_at 1.03979 "Histocompatibility 2, K1, K region" H2-K1  
1437368\_at 1.02811 "general transcription factor II H, polypeptide 4 /// similar to general  
transcription factor II H, polypeptide 4" Gtf2h4 /// LOC640308  
1437369\_at 0.91707 --- ---  
1437370\_at 0.91033 shugoshin-like 2 (*S. pombe*) Sgol2  
1437371\_at 0.74868 RIKEN cDNA 9930021J17 gene 9930021J17Rik  
1437372\_at 1.43939 cleavage and polyadenylation specific factor 6 Cpsf6  
1437373\_at 1.08401 interferon stimulated exonuclease gene 20-like 1 Isg20l1  
1437374\_at 0.97295 RIKEN cDNA 6430526N21 gene 6430526N21Rik  
1437375\_at 0.93219 "0 day neonate thymus cDNA, RIKEN full-length enriched library, clone:

A430010E21 product:unclassifiable, full insert sequence" ---

1437376\_at 1.04491 a disintegrin and metallopeptidase domain 32 Adam32

1437377\_a\_at 0.94629 polymerase (RNA) mitochondrial (DNA directed) Polrmt

1437378\_x\_at 0.91995 "scavenger receptor class B, member 1" Scarb1

1437379\_x\_at 0.92258 TNF receptor-associated protein 1 Trap1

1437380\_x\_at 1.28477 phosphogluconate dehydrogenase Pgd

1437381\_x\_at 1.02182 G protein-coupled receptor 172B Gpr172b

1437382\_at 0.83623 Activin receptor IIA Acvr2a

1437383\_at 0.95626 Cyclin L1 Ccnl1

1437384\_at 0.90206 RIKEN cDNA 1700015E13 gene 1700015E13Rik

1437385\_at 0.97369 collagen and calcium binding EGF domains 1 Ccbe1

1437386\_at 1.03271 leucine rich repeat neuronal 6A Lrn6a

1437387\_at 0.94352 sushi domain containing 5 Susd5

1437388\_at 0.98579 fucosyltransferase 10 Fut10

1437389\_x\_at 0.97144 --- ---

1437390\_x\_at 1.01576 syntaxin 1A (brain) Stx1a

1437391\_x\_at 0.98071 mitochondrial ribosomal protein L44 Mrpl44

1437392\_at 0.97448 hypothetical LOC433485 LOC433485

1437393\_at 0.81874 expressed sequence AI875142 AI875142

1437394\_at 0.96781 "centaurin, gamma 2" Centg2

1437395\_at 0.99346 "zinc finger, CCHC domain containing 11" Zcchc11

1437396\_at 0.87681 cAMP responsive element binding protein 3-like 2 Creb3l2

1437397\_at 0.90938 prolactin receptor Prlr

1437398\_a\_at 1.04549 "aldehyde dehydrogenase 9, subfamily A1" Aldh9a1

1437399\_at 0.81567 claudin domain containing 1 Clnd1

1437400\_at 0.98379 "Adult male corpus striatum cDNA, RIKEN full-length enriched library, clone: C030044L04 product:unclassifiable, full insert sequence" ---

1437401\_at 0.78029 --- ---

1437402\_x\_at 0.98353 transmembrane protein 41B Tmem41b

1437403\_at 1.08433 RIKEN cDNA E130306M17 gene E130306M17Rik

1437404\_at 0.82607 microtubule associated serine/threonine kinase family member 4 Mast4

1437405\_a\_at 0.55145 insulin-like growth factor binding protein 4 Igfbp4

1437406\_x\_at 0.61242 insulin-like growth factor binding protein 4 Igfbp4

1437407\_at 1.03408 RIKEN cDNA 9930039A11 gene 9930039A11Rik

1437408\_at 1.00798 G protein-coupled receptor 126 Gpr126

1437409\_s\_at 0.82366 G protein-coupled receptor 126 Gpr126

1437410\_at 0.99661 "aldehyde dehydrogenase 2, mitochondrial" Aldh2

1437411\_at 1.11588 cDNA sequence BC010584 BC010584

1437412\_at 1.00731 "peroxiredoxin 6, related sequence 1" Prdx6-rs1

1437413\_x\_at 0.90559 ribosomal protein S29 /// similar to 40S ribosomal protein S29 /// similar to 40S ribosomal protein S29 Rps29 /// LOC629957 /// LOC637599

1437414\_at 0.99808 zinc finger protein 217 Zfp217

1437415\_at 1.04747 RIKEN cDNA 4933427D06 gene 4933427D06Rik

1437416\_at 0.94798 cDNA sequence BC034902 BC034902  
 1437417\_s\_at 0.76173 glypican 6 Gpc6  
 1437418\_at 1.05625 --- ---  
 1437419\_at 0.94968 BMP2 inducible kinase Bmp2k  
 1437420\_at 0.92756 "bromodomain adjacent to zinc finger domain, 1B" Baz1b  
 1437421\_at 0.97992 RIKEN cDNA 6330509M05 gene 6330509M05Rik  
 1437422\_at 0.95710 "sema domain, seven thrombospondin repeats (type 1 and type 1-like),  
 transmembrane domain (TM) and short cytoplasmic domain, (semaphorin) 5A" Sema5a  
 1437423\_a\_at 0.99083 steroid receptor RNA activator 1 Sra1  
 1437424\_at 1.11224 "synapse defective 1, Rho GTPase, homolog 2 (C. elegans) /// similar to synapse  
 defective 1, Rho GTPase, homolog 1" Syde2 /// LOC639654  
 1437425\_at 0.90860 ganglioside-induced differentiation-associated-protein 1 Gdap1  
 1437426\_at 1.67433 WW domain containing adaptor with coiled-coil Wac  
 1437427\_at 1.06982 RIKEN cDNA 4933405O20 gene 4933405O20Rik  
 1437428\_x\_at 1.06447 "eukaryotic translation initiation factor 2B, subunit 2 beta" Eif2b2  
 1437429\_at 0.84383 RIKEN cDNA 5930437A14 gene 5930437A14Rik  
 1437430\_at 0.94797 "solute carrier family 45, member 2" Slc45a2  
 1437431\_at 1.62510 --- ---  
 1437432\_a\_at 1.04412 tripartite motif protein 12 Trim12  
 1437433\_at 1.05469 "UDP-Gal:betaGlcNAc beta 1,3-galactosyltransferase, polypeptide 2"  
 B3galt2  
 1437434\_a\_at 0.86080 G protein-coupled receptor 177 Gpr177  
 1437435\_at 0.87812 RIKEN cDNA 1700061G19 gene /// similar to gonadotropin-regulated long  
 chain acyl-CoA synthetase 1700061G19Rik /// LOC669384  
 1437436\_s\_at 0.97263 G protein-coupled receptor kinase 6 Gprk6  
 1437437\_x\_at 0.89227 aspartyl aminopeptidase Dnpep  
 1437438\_x\_at 1.16711 pancreatic lipase-related protein 2 Pnliprp2  
 1437439\_at 0.96551 RIKEN cDNA 2410089E03 gene 2410089E03Rik  
 1437440\_at 0.91249 Transcribed locus ---  
 1437441\_at 1.00269 expressed sequence AA388235 AA388235  
 1437442\_at 0.73638 --- ---  
 1437443\_at 1.18226 "PREDICTED: Mus musculus hypothetical protein LOC620382 (LOC620382),  
 mRNA" ---  
 1437444\_at 1.02702 "protocadherin gamma subfamily C, 3" Pcdhgc3  
 1437445\_at 0.90854 "transient receptor potential cation channel, subfamily M, member 1" Trpm1  
 1437446\_at 1.17380 "RAB5B, member RAS oncogene family" Rab5b  
 1437447\_s\_at 0.99843 "excision repair cross-complementing rodent repair deficiency,  
 complementation group 1" Ercc1  
 1437448\_s\_at 0.98513 "catenin (cadherin associated protein), delta 1" Ctnnd1  
 1437449\_at 1.15279 radical S-adenosyl methionine domain containing 1 Rsad1  
 1437450\_x\_at 0.99943 RIKEN cDNA 2700060E02 gene 2700060E02Rik  
 1437451\_at 1.37640 RIKEN cDNA 1110006O17 gene 1110006O17Rik  
 1437452\_x\_at 1.09827 voltage-dependent anion channel 1 Vdac1



1437453\_s\_at 1.33597 proprotein convertase subtilisin/kexin type 9 Pcsk9  
 1437454\_a\_at 0.99955 thioredoxin domain containing 14 /// similar to thioredoxin-related  
 transmembrane protein 2 Txndc14 /// LOC433144  
 1437455\_a\_at 0.94191 "B-cell translocation gene 1, anti-proliferative" Btg1  
 1437456\_x\_at 0.96988 YTH domain family 1 Ythdf1  
 1437457\_a\_at 1.01621 myotrophin Mtpn  
 1437458\_x\_at 0.84254 clusterin Clu  
 1437459\_x\_at 0.94394 "solute carrier family 25 (mitochondrial deoxynucleotide carrier), member  
 19" Slc25a19  
 1437460\_x\_at 1.08390 Ras and Rab interactor 1 Rin1  
 1437461\_s\_at 0.77267 "RNA-binding region (RNP1, RRM) containing 3" Rnpc3  
 1437462\_x\_at 0.72836 matrix metalloproteinase 15 Mmp15  
 1437463\_x\_at 0.98794 "transforming growth factor, beta induced" Tgfb1  
 1437464\_at 0.91457 spermatogenesis associated 7 Spata7  
 1437465\_a\_at 0.94896 "prolyl 4-hydroxylase, beta polypeptide" P4hb  
 1437466\_at 0.69113 activated leukocyte cell adhesion molecule Alcam  
 1437467\_at 0.84916 activated leukocyte cell adhesion molecule Alcam  
 1437468\_x\_at 0.94706 F-box and WD-40 domain protein 11 Fbxw11  
 1437469\_at 0.97031 zinc finger protein 750 Zfp750  
 1437470\_at 0.91799 Pbx/knotted 1 homeobox Pknox1  
 1437471\_at 0.96783 leucine rich repeat containing 45 Lrrc45  
 1437472\_at 0.79846 unc-13 homolog A (C. elegans) Unc13a  
 1437473\_at 0.95088 avian musculoaponeurotic fibrosarcoma (v-maf) AS42 oncogene homolog  
 Maf  
 1437474\_at 1.00169 GATA zinc finger domain containing 2B Gatad2b  
 1437475\_at 0.92782 cDNA sequence BC028454 BC028454  
 1437476\_at 0.82444 ribonucleotide reductase M2 B (TP53 inducible) Rrm2b  
 1437477\_at 1.04090 leucine rich repeat (in FLII) interacting protein 1 Lrrfip1  
 1437478\_s\_at 1.02214 EF hand domain containing 2 Efhd2  
 1437479\_x\_at 0.89997 T-box 3 Tbx3  
 1437480\_at 1.05688 --- ---  
 1437481\_at 1.09352 hypothetical LOC623451 LOC623451  
 1437482\_at 1.03095 steroid 5 alpha-reductase 2-like 2 Srd5a2l2  
 1437483\_at 1.00323 zinc finger protein 513 Zfp513  
 1437484\_at 0.99535 zinc finger and BTB domain containing 5 Zbtb5  
 1437485\_at 1.30650 nitric oxide synthase 1 (neuronal) adaptor protein Nos1ap  
 1437486\_at 1.06203 "G protein-coupled receptor, family C, group 5, member A" Gprc5a  
 1437487\_at 0.99627 MYST histone acetyltransferase (monocytic leukemia) 3 Myst3  
 1437488\_at 1.02687 "solute carrier family 9 (sodium/hydrogen exchanger), isoform 9" Slc9a9  
 1437489\_x\_at 1.01694 "succinate dehydrogenase complex, subunit D, integral membrane protein"  
 Sdhb  
 1437490\_x\_at 1.02113 UDP-N-acetylglucosamine pyrophosphorylase 1 /// similar to UDP-N-  
 acetylhexosamine pyrophosphorylase Uap1 /// LOC640502

|              |                                                                                                                                                    |                     |
|--------------|----------------------------------------------------------------------------------------------------------------------------------------------------|---------------------|
| 1437491_at   | 1.26660 bicaudal D homolog 2 (Drosophila)                                                                                                          | Bicd2               |
| 1437492_at   | 0.89884 mohawk                                                                                                                                     | Mkx                 |
| 1437493_at   | 1.88914 RIKEN cDNA 5230400M03 gene                                                                                                                 | 5230400M03Rik       |
| 1437494_at   | 1.04000 mitogen-activated protein kinase-activated protein kinase 3                                                                                | Mapkapk3            |
| 1437495_at   | 1.15448 "membrane-bound transcription factor peptidase, site 2"                                                                                    | Mbtps2              |
| 1437496_at   | 1.01581 RIKEN cDNA 9330129D05 gene                                                                                                                 | 9330129D05Rik       |
| 1437497_a_at | 1.08614 "heat shock protein 90kDa alpha (cytosolic), class A member 1"                                                                             | Hsp90aa1            |
| 1437498_at   | 0.97598 ---                                                                                                                                        | ---                 |
| 1437499_at   | 1.48349 ankyrin repeat domain 39                                                                                                                   | Ankrd39             |
| 1437500_at   | 1.15486 "Solute carrier family 39 (zinc transporter), member 12"                                                                                   | Slc39a12            |
| 1437501_at   | 0.89384 cDNA sequence AF529169                                                                                                                     | AF529169            |
| 1437502_x_at | 0.86776 CD24a antigen                                                                                                                              | Cd24a               |
| 1437503_a_at | 0.93703 scotin gene                                                                                                                                | Scotin              |
| 1437504_at   | 0.85235 Src-like-adaptor 2                                                                                                                         | Sla2                |
| 1437505_at   | 1.80642 Triple functional domain (PTPRF interacting)                                                                                               | Trio                |
| 1437506_at   | 0.68199 ---                                                                                                                                        | ---                 |
| 1437507_at   | 0.93320 GATA zinc finger domain containing 2B                                                                                                      | Gatad2b             |
| 1437508_at   | 0.85010 trans-acting transcription factor 4                                                                                                        | Sp4                 |
| 1437509_x_at | 0.92143 protein kinase D2                                                                                                                          | Prkd2               |
| 1437510_x_at | 1.02909 ribosomal protein S17                                                                                                                      | Rps17               |
| 1437511_x_at | 0.94089 chloride channel CLIC-like 1                                                                                                               | Clcc1               |
| 1437512_x_at | 0.94010 EBNA1 binding protein 2                                                                                                                    | Ebna1bp2            |
| 1437513_a_at | 0.96221 serine incorporator 1                                                                                                                      | Serinc1             |
| 1437514_at   | 1.08324 RIKEN cDNA B430306N03 gene                                                                                                                 | B430306N03Rik       |
| 1437515_at   | 0.97616 ---                                                                                                                                        | ---                 |
| 1437516_at   | 1.12373 Transcribed locus                                                                                                                          | ---                 |
| 1437517_x_at | 0.94907 "serine (or cysteine) peptidase inhibitor, clade B (ovalbumin), member 3A"                                                                 | Serpib3a            |
| 1437518_at   | 1.00761 "10 days neonate cerebellum cDNA, RIKEN full-length enriched library, clone:6530404G16 product:hypothetical protein, full insert sequence" | ---                 |
| 1437519_x_at | 1.09476 hydroxyacyl glutathione hydrolase                                                                                                          | Hagh                |
| 1437520_a_at | 1.00291 nucleoporin 85                                                                                                                             | Nup85               |
| 1437521_s_at | 1.00473 RIKEN cDNA E230022H04 gene                                                                                                                 | E230022H04Rik       |
| 1437522_x_at | 0.93041 growth hormone                                                                                                                             | Gh                  |
| 1437523_s_at | 1.02305 "sarcoglycan, gamma (dystrophin-associated glycoprotein)"                                                                                  | Sgcg                |
| 1437524_x_at | 0.94683 coronin 7                                                                                                                                  | Coro7               |
| 1437525_a_at | 1.01657 polymerase (RNA) III (DNA directed) polypeptide A                                                                                          | Polr3a              |
| 1437526_x_at | 0.95805 heterogeneous nuclear ribonucleoprotein R /// similar to heterogeneous nuclear ribonucleoprotein R                                         | Hnrpr /// LOC669321 |
| 1437527_x_at | 0.86373 myeloid cell leukemia sequence 1                                                                                                           | Mcl1                |
| 1437528_x_at | 0.89315 RIKEN cDNA A730017C20 gene                                                                                                                 | A730017C20Rik       |
| 1437529_at   | 1.00263 "MAS-related GPR, member B1"                                                                                                               | Mrgprb1             |
| 1437530_at   | 0.96859 Programmed cell death 10                                                                                                                   | Pdcd10              |

1437531\_at 0.99847 "transient receptor potential cation channel, subfamily M, member 1" Trpm1  
1437532\_at 0.93077 RIKEN cDNA 2810055G22 gene /// similar to ubiquitin conjugating enzyme 7  
interacting protein 1 2810055G22Rik /// LOC673825  
1437533\_at 1.08820 baculoviral IAP repeat-containing 4 Birc4  
1437534\_at 1.08817 "PREDICTED: Mus musculus similar to Rap guanine nucleotide exchange  
factor 2 (PDZ domain containing guanine nucleotide exchange factor 1) (PDZ-GEF1) (LOC620996),  
mRNA" ---  
1437535\_at 0.98157 "protein phosphatase 3, regulatory subunit B, alpha isoform (calcineurin B, type  
II)" Ppp3r2  
1437536\_at 0.86457 fukutin related protein Fkrp  
1437537\_at 0.92077 caspase 9 Casp9  
1437538\_at 1.18729 RIKEN cDNA 2610002F03 gene 2610002F03Rik  
1437539\_at 0.95942 "protein kinase, AMP-activated, alpha 1 catalytic subunit" Prkaa1  
1437540\_at 0.92945 --- ---  
1437541\_at 1.00250 --- ---  
1437542\_at 0.92413 RIKEN cDNA A730095J18 gene A730095J18Rik  
1437543\_at 1.72683 far upstream element (FUSE) binding protein 1 Fubp1  
1437544\_at 1.16168 far upstream element (FUSE) binding protein 1 Fubp1  
1437545\_at 1.03892 REST corepressor 1 Rcor1  
1437546\_at 0.91929 "DnaJ (Hsp40) homolog, subfamily C, member 14" Dnajc14  
1437547\_s\_at 0.88725 "DnaJ (Hsp40) homolog, subfamily C, member 14" Dnajc14  
1437548\_at 1.13138 bicaudal D homolog 1 (Drosophila) Bicd1  
1437549\_at 1.07690 RIKEN cDNA 2810408I11 gene 2810408I11Rik  
1437550\_at 0.94081 DEAH (Asp-Glu-Ala-His) box polypeptide 36 Dhx36  
1437551\_at 1.29216 RIKEN cDNA 4930504E06 gene 4930504E06Rik  
1437552\_at 0.96904 "RIKEN cDNA 2410127L17 gene /// similar to RIKEN cDNA 2410127L17 ///  
similar to RIKEN cDNA 2410127L17 /// hypothetical protein LOC665401 /// hypothetical protein  
LOC665714 /// similar to CG11596-PA, isoform A /// similar to CG11596-PA, isoform A /// similar to  
RIKEN cDNA 2410127L17 gene" 2410127L17Rik /// LOC624038 /// LOC626107 /// LOC665401 ///  
LOC665714 /// LOC666456 /// LOC677519 /// LOC677553  
1437553\_at 1.02427 "BRCA1/BRCA2-containing complex, subunit 3" Brcc3  
1437554\_at 0.95797 plectin 1 Plec1  
1437555\_at 1.04819 RIKEN cDNA E130309B19 gene E130309B19Rik  
1437556\_at 0.97489 zinc finger homeodomain 4 Zfhx4  
1437557\_at 0.91504 "DNA segment, Chr 3, ERATO Doi 254, expressed" D3Ertd254e  
1437558\_at 0.55992 RIKEN cDNA B130021B11 gene B130021B11Rik  
1437559\_at 0.99908 "DNA segment, Chr 13, Brigham & Women's Genetics 1146 expressed"  
D13Bwg1146e  
1437560\_at 0.91792 "neurotrophic tyrosine kinase, receptor, type 2" Ntrk2  
1437561\_at 0.97400 T cell receptor associated transmembrane adaptor 1 Trat1  
1437562\_at 0.97430 RIKEN cDNA 4932422M17 gene 4932422M17Rik  
1437563\_at 0.96509 PHD finger protein 20-like 1 Phf2011  
1437564\_at 1.27011 "polymerase (DNA directed), gamma" Polg

1437565\_a\_at 1.09487 similar to guanine nucleotide binding protein-like 2 (nucleolar)  
 LOC633966  
 1437566\_at 1.04429 similar to guanine nucleotide binding protein-like 2 (nucleolar) LOC633966  
 1437567\_at 1.02972 CDNA sequence BC023179 BC023179  
 1437568\_at 0.93920 matrix metalloproteinase 16 Mmp16  
 1437569\_at 0.95063 transmembrane protein 132E Tmem132e  
 1437570\_at 1.40021 expressed sequence AI503301 AI503301  
 1437571\_at 1.25620 hypermethylated in cancer 2 Hic2  
 1437572\_at 0.90922 DCP1 decapping enzyme homolog b (S. cerevisiae) Dcp1b  
 1437573\_at 1.08766 "Mus musculus, clone IMAGE:3493537, mRNA" ---  
 1437574\_at 1.03322 "a disintegrin-like and metalloproteinase (reprolysin type) with thrombospondin  
 type 1 motif, 18" Adamts18  
 1437575\_at 1.08988 minichromosome maintenance deficient domain containing 1 Mcmdc1  
 1437576\_at 1.36038 RIKEN cDNA 2810427A07 gene 2810427A07Rik  
 1437577\_at 2.31810 --- ---  
 1437578\_at 1.11042 chloride channel calcium activated 1 /// chloride channel calcium activated 2  
 Clca1 /// Clca2  
 1437579\_at 0.92110 NIMA (never in mitosis gene a)-related expressed kinase 2 Nek2  
 1437580\_s\_at 1.08639 NIMA (never in mitosis gene a)-related expressed kinase 2 Nek2  
 1437581\_at 1.04416 EST AA407452 AA407452  
 1437582\_at 1.06042 acyl-CoA synthetase short-chain family member 1 Acss1  
 1437583\_x\_at 1.14325 acyl-CoA synthetase short-chain family member 1 Acss1  
 1437584\_at 1.07037 Cyclin D3 Cnd3  
 1437585\_x\_at 0.84098 zinc finger protein 161 Zfp161  
 1437586\_at 1.01675 "CCR4-NOT transcription complex, subunit 4" Cnot4  
 1437587\_at 1.11549 Transcribed locus ---  
 1437588\_at 0.97642 "POU domain, class 4, transcription factor 2" Pou4f2  
 1437589\_x\_at 0.88580 Lck interacting transmembrane adaptor 1 Lime1  
 1437590\_at 0.96909 RIKEN cDNA 4833409A17 gene 4833409A17Rik  
 1437591\_a\_at 0.93557 WD repeat domain 1 Wdr1  
 1437592\_x\_at 0.98325 coiled-coil domain containing 101 Ccdc101  
 1437593\_x\_at 0.96440 apoptosis inhibitor 5 Api5  
 1437594\_x\_at 0.88389 "phosphatidylinositol glycan anchor biosynthesis, class T" Pigt  
 1437595\_at 0.98627 RIKEN cDNA E030010A14 gene E030010A14Rik  
 1437596\_at 0.96661 Ly6/Plaur domain containing 4 Lypd4  
 1437597\_at 0.94262 Transcribed locus ---  
 1437598\_at 0.93460 zinc finger and BTB domain containing 20 Zbtb20  
 1437599\_at 1.41784 Coiled-coil-helix-coiled-coil-helix domain containing 3 Chchd3  
 1437600\_at 0.96375 "Atpase, class VI, type 11C" Atp11c  
 1437601\_at 0.95238 orthodenticle homolog 1 (Drosophila) Otx1  
 1437602\_at 0.99281 similar to Hypothetical protein MGC26988 RP23-27307.4  
 1437603\_at 1.09320 cDNA sequence BC050777 BC050777  
 1437604\_x\_at 0.89273 adenomatous polyposis coli down-regulated 1 Apcdd1

1437605\_at 0.94676 "nephrosis 2 homolog, podocin (human)" Nphs2  
1437606\_at 0.99760 "Transcribed locus, weakly similar to NP\_808467.1 hypothetical protein  
LOC327860 [Mus musculus]" ---  
1437607\_at 1.01167 "Glucosaminyl (N-acetyl) transferase 2, I-branching enzyme" Gcnt2  
1437608\_x\_at 0.90875 "tyrosine 3-monooxygenase/tryptophan 5-monooxygenase activation protein,  
theta polypeptide" Ywhaq  
1437609\_at 0.96960 ubiquitin-conjugating enzyme E2U (putative) Ube2u  
1437610\_x\_at 1.04856 ribosomal protein S8 Rps8  
1437611\_x\_at 1.08377 kinesin family member 2C Kif2c  
1437612\_at 0.92161 Nucleoporin 62 Nup62  
1437613\_s\_at 0.75490 expressed sequence AW456874 AW456874  
1437614\_x\_at 0.97942 "zinc finger, DHHC domain containing 14" Zdhhc14  
1437615\_s\_at 0.96174 Vacuolar protein sorting 37C (yeast) Vps37c  
1437616\_x\_at 1.01182 "zinc finger, DHHC domain containing 14" Zdhhc14  
1437617\_x\_at 0.99783 RIKEN cDNA 1110034G24 gene 1110034G24Rik  
1437618\_x\_at 0.94019 G protein-coupled receptor 85 Gpr85  
1437619\_x\_at 1.05630 "discoidin domain receptor family, member 1" Ddr1  
1437620\_x\_at 1.04947 "Aldehyde dehydrogenase 18 family, member A1" Aldh18a1  
1437621\_x\_at 1.16164 3-phosphoglycerate dehydrogenase /// similar to 3-phosphoglycerate  
dehydrogenase /// similar to 3-phosphoglycerate dehydrogenase /// similar to 3-phosphoglycerate  
dehydrogenase Phgdh /// LOC668771 /// LOC671972 /// LOC673015  
1437622\_x\_at 1.03737 mitochondrial ribosomal protein L28 Mrpl28  
1437623\_x\_at 1.09404 X-ray repair complementing defective repair in Chinese hamster cells 3 Xrcc3  
1437624\_x\_at 0.91185 nudix (nucleoside diphosphate linked moiety X)-type motif 16-like 1  
Nudt16l1  
1437625\_at 0.97431 "Ribosomal protein S6 kinase, polypeptide 5" Rps6ka5  
1437626\_at 1.00514 "zinc finger protein 36, C3H type-like 2" Zfp3612  
1437627\_at 0.96909 ring finger (C3HC4 type) and KH domain containing 1 Rkhd1  
1437628\_s\_at 0.98653 "ras homolog gene family, member A" Rhoa  
1437629\_at 0.84634 Rho guanine nucleotide exchange factor (GEF) 19 Arhgef19  
1437630\_at 0.97246 large subunit GTPase 1 homolog (S. cerevisiae) Lsg1  
1437631\_at 1.05826 Kv channel interacting protein 4 Kcnip4  
1437632\_at 0.98236 "Adult male cecum cDNA, RIKEN full-length enriched library,  
clone:9130409M07 product:hypothetical protein, full insert sequence" ---  
1437633\_at 1.08325 ankyrin repeat domain 11 Ankrd11  
1437634\_at 1.00134 THO complex 2 Thoc2  
1437635\_at 1.12627 "discoidin, CUB and LCCL domain containing 2" Dcbl2  
1437636\_at 0.91661 Similar to Interferon-activatable protein 203 (Ifi-203) (Interferon-inducible  
protein p203) LOC623121  
1437637\_at 0.97397 putative homeodomain transcription factor 2 Phtf2  
1437638\_at 2.01974 serine/arginine repetitive matrix 2 Srrm2  
1437639\_at 0.64076 RIKEN cDNA 3321401G04 gene 3321401G04Rik  
1437640\_at 1.01319 RIKEN cDNA 6430704M03 gene 6430704M03Rik

1437641\_at 0.76918 RIKEN cDNA 4930535B03 gene 4930535B03Rik  
1437642\_at 1.21376 HIV-1 Rev binding protein-like Hrbl  
1437643\_at 1.06008 centromere protein J Cenpj  
1437644\_at 1.03114 "UDP-Gal:betaGlcNAc beta 1,3-galactosyltransferase, polypeptide 2"  
B3galt2  
1437645\_at 1.05165 activating transcription factor 7 Atf7  
1437646\_at 0.87185 zinc and ring finger 3 /// similar to Goliath homolog precursor (Ring finger  
protein 130) (R-goliath) Znrf3 /// LOC631806  
1437647\_at 1.21089 death inducer-obliterator 1 Dido1  
1437648\_at 1.17024 "phosphate cytidylyltransferase 1, choline, beta isoform" Pcyt1b  
1437649\_x\_at 0.95832 peptidylprolyl isomerase B Ppib  
1437650\_at 1.08839 hypothetical protein C730026J16 C730026J16  
1437651\_a\_at 0.87964 "dystrobrevin, beta" Dtnb  
1437652\_at 1.03486 "sema domain, transmembrane domain (TM), and cytoplasmic domain,  
(semaphorin) 6C" Sema6c  
1437653\_at 1.06472 "immunity-related GTPase family, Q" Irgq  
1437654\_at 1.09894 RIKEN cDNA 3110001K24 gene 3110001K24Rik  
1437655\_at 0.89653 RIKEN cDNA D430020J02 gene D430020J02Rik  
1437656\_at 0.97759 Rho guanine nucleotide exchange factor (GEF) 4 Arhgef4  
1437657\_at 0.87472 zinc finger protein 291 Zfp291  
1437658\_a\_at 1.15237 "small nucleolar RNA, C/D box 22" Snord22  
1437659\_at 0.96940 "amyotrophic lateral sclerosis 2 (juvenile) chromosome region, candidate 11  
(human)" Als2cr11  
1437660\_at 1.42515 natural killer tumor recognition sequence Nktr  
1437661\_at 0.84874 expressed sequence AU021092 AU021092  
1437662\_at 1.09186 RIKEN cDNA C730027J19 gene C730027J19Rik  
1437663\_at 1.11072 "phosphatidylinositol glycan anchor biosynthesis, class V" Pigv  
1437664\_at 1.04101 homeo box D3 Hoxd3  
1437665\_at 1.12099 "Interleukin 22 receptor, alpha 2" Il22ra2  
1437666\_x\_at 0.91356 ubiquitin C Ubc  
1437667\_a\_at 1.24738 BTB and CNC homology 2 Bach2  
1437668\_at 0.89921 Chemokine (C-C motif) receptor-like 1 Ccr1l  
1437669\_x\_at 0.89121 Chemokine (C-C motif) receptor-like 1 Ccr1l  
1437670\_x\_at 0.89717 CD151 antigen Cd151  
1437671\_x\_at 1.03500 "protease, serine, 23" Prss23  
1437672\_at 1.04742 insulin receptor substrate 3 Irs3  
1437673\_at 1.01191 Transcribed locus ---  
1437674\_at 1.22619 RAS-related C3 botulinum substrate 1 Rac1  
1437675\_at 0.96240 "solute carrier family 8 (sodium/calcium exchanger), member 1" Slc8a1  
1437676\_at 1.08441 sperm associated antigen 9 Spag9  
1437677\_at 1.14522 EST AI449595 AI449595  
1437678\_at 0.93954 "gene model 1564, (NCBI)" Gm1564  
1437679\_a\_at 0.98472 glutaredoxin 2 (thioltransferase) Glrx2

1437680\_x\_at 1.10221 glutaredoxin 2 (thioltransferase) Glrx2  
1437681\_at 1.04423 "glutamate receptor, ionotropic, kainate 4" Grik4  
1437682\_x\_at 1.03077 RIKEN cDNA 1110004E09 gene 1110004E09Rik  
1437683\_x\_at 1.02122 small EDRK-rich factor 2 Serf2  
1437684\_at 0.96161 CDNA sequence BC025546 BC025546  
1437685\_x\_at 0.66058 fibromodulin Fmod  
1437686\_x\_at 0.90239 cut-like 1 (Drosophila) Cutl1  
1437687\_x\_at 0.88238 FK506 binding protein 9 Fkbp9  
1437688\_x\_at 0.98381 "ATPase, H+ transporting, lysosomal accessory protein 2" Atp6ap2  
1437689\_x\_at 0.85299 clusterin Clu  
1437690\_x\_at 0.94082 "casein kinase 1, delta" Csnk1d  
1437691\_at 0.90866 annexin A2 Anxa2  
1437692\_x\_at 1.04168 annexin A2 Anxa2  
1437693\_at 1.03371 "DNA segment, Chr 1, Pasteur Institute 1" D1Pas1  
1437694\_at 1.01153 Expressed sequence BB114266 BB114266  
1437695\_at 0.92233 prokineticin receptor 2 Prokr2  
1437696\_at 1.04980 cDNA sequence BC049807 BC049807  
1437697\_at 0.86491 RAD23a homolog (S. cerevisiae) Rad23a  
1437698\_at 1.09273 myosin Vb Myo5b  
1437699\_at 0.98668 RIKEN cDNA E430014B02 gene E430014B02Rik  
1437700\_at 2.53823 Schwannomin interacting protein 1 Schip1  
1437701\_at 0.95461 "Smith-Magenis syndrome chromosome region, candidate 8 homolog (human)"  
Smcr8  
1437702\_at 0.99622 transglutaminase 6 Tgm6  
1437703\_at 0.94227 similar to F-box- and WD40-repeat-containing protein LOC382156  
1437704\_at 1.21384 RIKEN cDNA 2900024O10 gene 2900024O10Rik  
1437705\_at 1.01106 zinc finger protein 551 Zfp551  
1437706\_x\_at 1.09909 ribosomal protein S14 /// similar to ribosomal protein S14 Rps14 ///  
LOC672818  
1437707\_at 0.93222 cDNA sequence BC019561 BC019561  
1437708\_x\_at 0.99713 vesicle-associated membrane protein 3 Vamp3  
1437709\_x\_at 0.89785 tetratricopeptide repeat domain 13 Ttc13  
1437710\_x\_at 0.90140 RIKEN cDNA 1700021P22 gene 1700021P22Rik  
1437711\_x\_at 1.00533 "ornithine decarboxylase, structural 1 /// similar to Ornithine decarboxylase  
(ODC) /// similar to Ornithine decarboxylase (ODC) /// similar to Ornithine decarboxylase (ODC) ///  
hypothetical protein LOC671973 /// similar to Ornithine decarboxylase (ODC)" Odc1 ///  
LOC666231 /// LOC668343 /// LOC670279 /// LOC671973 /// LOC673302  
1437712\_x\_at 1.02163 exosome component 4 Exosc4  
1437713\_x\_at 0.91727 RIKEN cDNA 1500010J02 gene 1500010J02Rik  
1437714\_x\_at 0.96911 Ubiquitin specific peptidase 14 Usp14  
1437715\_x\_at 1.18694 apurinic/aprimidinic endonuclease 1 Apex1  
1437716\_x\_at 1.01936 kinesin family member 22 Kif22  
1437717\_x\_at 1.41776 RIKEN cDNA 2610005L07 gene /// RIKEN cDNA A430108E01 gene ///

similar to p47 protein isoform a 2610005L07Rik /// A430108E01Rik /// LOC547150

1437718\_x\_at 0.70663 fibromodulin Fmod

1437719\_x\_at 1.03390 RIKEN cDNA A230046K03 gene A230046K03Rik

1437720\_at 1.03383 Ligatin Lgtn

1437721\_at 1.18346 "coronin, actin binding protein 1C" Coro1c

1437722\_x\_at 0.92102 Poly(rC) binding protein 3 Pcbp3

1437723\_s\_at 0.99163 "Der1-like domain family, member 1" Der1l

1437724\_x\_at 0.90651 phosphatidylinositol membrane-associated 1 Pitpnm1

1437725\_x\_at 0.96198 TM2 domain containing 2 Tm2d2

1437726\_x\_at 1.16555 "complement component 1, q subcomponent, beta polypeptide" C1qb

1437727\_at 0.98682 Odd Oz/ten-m homolog 3 (Drosophila) Odz3

1437728\_at 1.21096 "alkB, alkylation repair homolog 5 (E. coli)" Alkbh5

1437729\_at 0.95944 ribosomal protein L27a Rpl27a

1437730\_at 1.05593 "protein phosphatase 2 (formerly 2A), regulatory subunit B (PR 52), alpha isoform" Ppp2r2a

1437731\_at 0.86597 RIKEN cDNA 5830404H04 gene 5830404H04Rik

1437732\_at 0.98664 "oocyte maturation, alpha /// similar to oocyte maturation, beta" Omt2a /// LOC640894

1437733\_at 1.04455 eukaryotic translation initiation factor 4E binding protein 2 Eif4ebp2

1437734\_at 0.97719 "protein phosphatase 1, regulatory (inhibitor) subunit 12A" Ppp1r12a

1437735\_at 0.95549 "protein phosphatase 1, regulatory (inhibitor) subunit 12A" Ppp1r12a

1437736\_at 0.95557 AKT1 substrate 1 (proline-rich) Akt1s1

1437737\_at 0.91720 expressed sequence AV340375 AV340375

1437738\_at 0.93137 "ATPase, Ca<sup>++</sup>-sequestering" Atp2c1

1437739\_a\_at 0.93357 RIKEN cDNA 5430432N15 gene 5430432N15Rik

1437740\_at 0.86437 "pleckstrin homology domain containing, family M (with RUN domain) member 2" Plekhm2

1437741\_at 0.99514 "RAB21, member RAS oncogene family" Rab21

1437742\_at 0.98364 "RAB21, member RAS oncogene family" Rab21

1437743\_at 1.13576 AE binding protein 2 Aebp2

1437744\_at 1.00298 "SLIT and NTRK-like family, member 4" Slitrk4

1437745\_at 1.04570 chromodomain helicase DNA binding protein 7 Chd7

1437746\_at 1.00193 leucine rich repeat transmembrane neuronal 1 Lrrtm1

1437747\_at 1.03455 "ubiquitination factor E4A, UFD2 homolog (S. cerevisiae)" Ube4a

1437748\_at 0.90582 fucosyltransferase 11 Fut11

1437749\_s\_at 0.96437 mitochondrial ribosomal protein L9 Mrpl9

1437750\_at 1.08911 Transcribed locus ---

1437751\_at 0.64629 "peroxisome proliferative activated receptor, gamma, coactivator 1 alpha" Ppargc1a

1437752\_at 1.03985 lin-28 homolog (C. elegans) Lin28

1437753\_at 1.01449 Expressed sequence AW742931 AW742931

1437754\_at 0.94143 expressed sequence AW146299 AW146299

1437755\_at 0.95177 "solute carrier family 5 (sodium/glucose cotransporter), member 12" Slc5a12



1437756\_at 0.90459 "GTPase, IMAP family member 9" Gimap9  
1437757\_at 1.24161 --- ---  
1437758\_a\_at 1.00504 "solute carrier family 4 (anion exchanger), member 1, adaptor protein"  
Slc4a1ap  
1437759\_at 0.59282 "Phosphofructokinase, platelet" Pfkp  
1437760\_at 1.08722 UDP-N-acetyl-alpha-D-galactosamine:polypeptide N-  
acetylgalactosaminyltransferase 12 Galnt12  
1437761\_at 1.01514 LUC7-like 2 (S. cerevisiae) Luc7l2  
1437762\_at 1.02023 "RAB39, member RAS oncogene family" Rab39  
1437763\_at 1.05504 "DCN1, defective in cullin neddylation 1, domain containing 3 (S. cerevisiae)"  
Dcun1d3  
1437764\_at 0.93875 RIKEN cDNA A730011L01 gene A730011L01Rik  
1437765\_at 1.07576 cytoplasmic polyadenylation element binding protein 3 Cpeb3  
1437766\_at 0.87866 Transcribed locus ---  
1437767\_s\_at 0.77992 fused toes Fts  
1437768\_at 1.19277 ankyrin repeat and IBR domain containing 1 Ankib1  
1437769\_at 1.18865 Epidermal growth factor receptor pathway substrate 15-like 1 Eps15l1  
1437770\_at 0.86140 expressed sequence AW557046 AW557046  
1437771\_at 1.06899 RIKEN cDNA 1110067I12 gene 1110067I12Rik  
1437772\_s\_at 0.90863 "fucosidase, alpha-L- 1, tissue" Fuca1  
1437773\_x\_at 0.91150 DEAD (Asp-Glu-Ala-Asp) box polypeptide 17 Ddx17  
1437774\_at 0.91786 RIKEN cDNA 1700020I14 gene 1700020I14Rik  
1437775\_at 1.41715 dihydrolipoamide S-succinyltransferase (E2 component of 2-oxo-glutarate  
complex) Dlst  
1437776\_at 1.25679 transmembrane and coiled coil domains 1 Tmcc1  
1437777\_at 1.24885 activating transcription factor 2 Atf2  
1437778\_at 0.92157 RNA binding motif protein 15B Rbm15b  
1437779\_at 1.09473 forkhead box H1 Foxh1  
1437780\_at 1.17963 "Fanconi anemia, complementation group B" Fancb  
1437781\_at 0.96663 Transcribed locus ---  
1437782\_at 0.98021 contactin associated protein-like 2 Cntnap2  
1437783\_x\_at 0.99977 transmembrane protein 4 Tmem4  
1437784\_at 1.11785 "runt-related transcription factor 1; translocated to, 1 (cyclin D-related)"  
Runx1t1  
1437785\_at 0.96345 "a disintegrin-like and metallopeptidase (reprolysin type) with thrombospondin  
type 1 motif, 9" Adamts9  
1437786\_at 0.97355 expressed sequence C80008 C80008  
1437787\_at 0.82888 Leucine rich repeat transmembrane neuronal 2 Lrrtm2  
1437788\_at 0.80537 trans-acting transcription factor 6 Sp6  
1437789\_at 2.30779 baculoviral IAP repeat-containing 6 Birc6  
1437790\_at 1.09088 echinoderm microtubule associated protein like 5 Eml5  
1437791\_s\_at 1.00603 echinoderm microtubule associated protein like 5 Eml5  
1437792\_at 0.93763 RIKEN cDNA 1700013D24 gene 1700013D24Rik

1437793\_at 1.94141 "Tankyrase, TRF1-interacting ankyrin-related ADP-ribose polymerase 2"  
 Tnks2  
 1437794\_at 0.97105 calcineurin binding protein 1 Cabin1  
 1437795\_at 1.23832 --- ---  
 1437796\_at 1.05549 Transcribed locus ---  
 1437797\_at 1.83269 "ATPase, Ca++ transporting, cardiac muscle, slow twitch 2" Atp2a2  
 1437798\_at 1.16320 RIKEN cDNA 6720422M22 gene 6720422M22Rik  
 1437799\_at 1.13258 RIKEN cDNA 4933407H18 gene 4933407H18Rik  
 1437800\_at 0.95153 EDAR (ectodysplasin-A receptor)-associated death domain Edaradd  
 1437801\_at 1.02920 mortality factor 4 like 1 /// similar to mortality factor 4 like 1 isoform b ///  
 similar to mortality factor 4 like 1 /// similar to mortality factor 4 like 1 (predicted) Morf411 ///  
 LOC433955 /// LOC627352 /// LOC635663  
 1437802\_x\_at 0.95172 mortality factor 4 like 1 /// similar to mortality factor 4 like 1 isoform b ///  
 similar to mortality factor 4 like 1 /// similar to mortality factor 4 like 1 (predicted) Morf411 ///  
 LOC433955 /// LOC627352 /// LOC635663  
 1437803\_at 0.96553 stem-loop binding protein /// similar to stem-loop binding protein /// similar to  
 stem-loop binding protein /// similar to stem-loop binding protein Slbp /// LOC666976 ///  
 LOC670567 /// LOC674607  
 1437804\_at 0.99227 Insulin-like growth factor binding protein 7 Igfbp7  
 1437805\_at 0.94816 --- ---  
 1437806\_x\_at 0.94636 mitochondrial carrier homolog 2 (C. elegans) Mtch2  
 1437807\_x\_at 0.97954 "catenin (cadherin associated protein), alpha 1" Ctnna1  
 1437808\_x\_at 0.88651 "Interleukin 10 receptor, alpha" Il10ra  
 1437809\_x\_at 1.01256 "E26 avian leukemia oncogene 2, 3' domain" Ets2  
 1437810\_a\_at 0.97292 "hemoglobin Z, beta-like embryonic chain" Hbb-bh1  
 1437811\_x\_at 0.87324 Coactosin-like 1 (Dictyostelium) Cotl1  
 1437812\_x\_at 0.93208 alpha glucosidase 2 alpha neutral subunit Ganab  
 1437813\_at 1.01937 absent in melanoma 1-like Aim11  
 1437814\_at 0.93676 "DnaJ (Hsp40) homolog, subfamily C, member 5 gamma" Dnajc5g  
 1437815\_at 0.88710 RIKEN cDNA 1700111A04 gene 1700111A04Rik  
 1437816\_at 0.97814 paired box gene 6 Pax6  
 1437817\_at 1.00184 synaptosomal-associated protein 91 Snap91  
 1437818\_at 1.03718 RIKEN cDNA 9430016H08 gene 9430016H08Rik  
 1437819\_s\_at 1.16395 RIKEN cDNA 9530020G05 gene 9530020G05Rik  
 1437820\_at 0.92590 forkhead-like 18 (Drosophila) Fkhl18  
 1437821\_at 1.84766 Diaphanous homolog 1 (Drosophila) Diap1  
 1437822\_at 1.22255 YME1-like 1 (S. cerevisiae) Yme11  
 1437823\_at 0.85219 RIKEN cDNA 2310040A07 gene 2310040A07Rik  
 1437824\_at 1.06380 "glutamate receptor, ionotropic, delta 2" Grid2  
 1437825\_at 0.91976 leucine rich repeat containing 4C Lrrc4c  
 1437826\_at 0.89569 Pore forming protein-like Pfpl  
 1437827\_s\_at 0.95534 Pore forming protein-like Pfpl  
 1437828\_s\_at 1.13804 WD repeat domain 46 Wdr46

1437829\_s\_at 0.71452 eukaryotic elongation factor-2 kinase Eef2k  
1437830\_x\_at 0.92711 "zinc finger, BED domain containing 3" Zbed3  
1437831\_at 0.93021 "zinc finger, CCHC domain containing 4" Zcchc4  
1437832\_x\_at 0.94470 tryptophanyl-tRNA synthetase Wars  
1437833\_at 1.50846 latent transforming growth factor beta binding protein 3 Ltbp3  
1437834\_s\_at 0.96134 protein kinase C and casein kinase substrate in neurons 3 Pacsin3  
1437835\_a\_at 0.93768 RIKEN cDNA 0610011L14 gene 0610011L14Rik  
1437836\_x\_at 0.91414 RIKEN cDNA 0610011L14 gene 0610011L14Rik  
1437837\_x\_at 0.89578 "polymerase (DNA-directed), delta interacting protein 3" Poldip3  
1437838\_x\_at 0.96947 G-rich RNA sequence binding factor 1 Grsf1  
1437839\_x\_at 0.96645 mitochondrial ribosomal protein L11 Mrpl11  
1437840\_s\_at 1.03681 "similar to CG3835-PA, isoform A" LOC673662  
1437841\_x\_at 0.83914 "cold shock domain containing C2, RNA binding" Csdc2  
1437842\_at 0.95265 "phosphatidylinositol-specific phospholipase C, X domain containing 1" Plcx1  
1437843\_s\_at 1.06348 Nucleoporin like 1 Nupl1  
1437844\_x\_at 0.97096 component of oligomeric golgi complex 1 Cog1  
1437845\_x\_at 0.78764 protein O-fucosyltransferase 2 Pofut2  
1437846\_x\_at 1.00163 beta-site APP-cleaving enzyme 2 Bace2  
1437847\_x\_at 1.03549 "RNA binding motif protein, X chromosome" Rbmx  
1437848\_x\_at 0.81453 ADP-dependent glucokinase Adpgk  
1437849\_x\_at 1.08444 "armadillo repeat containing, X-linked 2" Armcx2  
1437850\_a\_at 1.01019 cellular nucleic acid binding protein Cnbp  
1437851\_x\_at 1.01768 ribonucleic acid binding protein S1 Rnps1  
1437852\_x\_at 1.12075 cleavage and polyadenylation specificity factor 3 Cpsf3  
1437853\_x\_at 0.90391 necdin Ndn  
1437854\_at 1.05693 Leucine rich repeat containing 18 Lrrc18  
1437855\_at 1.06594 microtubule-associated protein 4 Mtap4  
1437856\_at 1.13335 inositol polyphosphate multikinase Ipmk  
1437857\_at 0.87423 dpy-19-like 3 (C. elegans) Dpy193  
1437858\_at 1.02995 dpy-19-like 3 (C. elegans) Dpy193  
1437859\_x\_at 1.21417 eukaryotic translation initiation factor 5A Eif5a  
1437860\_at 1.01431 "protein kinase C, epsilon" Prkce  
1437861\_s\_at 0.90565 --- ---  
1437862\_at 1.79447 RIKEN cDNA 2600011C06 gene 2600011C06Rik  
1437863\_at 0.86342 butyrylcholinesterase Bche  
1437864\_at 1.03851 adiponectin receptor 2 Adipor2  
1437865\_at 0.94260 spermatogenesis associated 13 Spata13  
1437866\_at 1.11938 dual specificity phosphatase 18 Dusp18  
1437867\_at 1.10365 "2 cells egg cDNA, RIKEN full-length enriched library, clone:B020014N01  
product:hypothetical protein, full insert sequence" ---  
1437868\_at 0.70564 cDNA sequence BC023892 BC023892  
1437869\_at 0.99408 RIKEN cDNA 3222402P14 gene 3222402P14Rik  
1437870\_at 1.01735 "solute carrier organic anion transporter family, member 4C1" Slco4c1

1437871\_at 0.85319 phosphoglucomutase 5 Pgm5  
1437872\_at 1.14233 cDNA sequence AB112350 AB112350  
1437873\_at 0.75507 RIKEN cDNA 6030490I01 gene 6030490I01Rik  
1437874\_s\_at 0.88284 hexosaminidase B Hexb  
1437875\_at 1.06439 bicaudal D homolog 2 (Drosophila) Bicd2  
1437876\_at 1.06892 fibronectin type III domain containing 6 Fndc6  
1437877\_at 1.00107 coiled-coil domain containing 39 /// tetratricopeptide repeat domain 14  
Ccdc39 /// Ttc14  
1437878\_s\_at 1.31114 coiled-coil domain containing 39 /// tetratricopeptide repeat domain 14  
Ccdc39 /// Ttc14  
1437879\_at 1.01599 expressed sequence AU045404 AU045404  
1437880\_at 1.06892 ladybird homeobox 1 homolog (Drosophila) corepressor 1 Lbxcor1  
1437881\_at 1.09421 RIKEN cDNA 6330416L07 gene 6330416L07Rik  
1437882\_s\_at 0.95671 RIKEN cDNA 3110048L19 gene /// RIKEN cDNA 6330416L07 gene  
3110048L19Rik /// 6330416L07Rik  
1437883\_s\_at 2.22842 --- ---  
1437884\_at 0.83603 ADP-ribosylation factor-like 5B Arl5b  
1437885\_at 0.90855 RIKEN cDNA D030029J20 gene D030029J20Rik  
1437886\_at 1.05022 kelch-like 6 (Drosophila) Klhl6  
1437887\_at 0.91521 RIKEN cDNA E130306M17 gene E130306M17Rik  
1437888\_at 0.90371 WNK lysine deficient protein kinase 1 Wnk1  
1437889\_x\_at 0.98085 biglycan Bgn  
1437890\_at 0.98328 RIKEN cDNA 1500005I02 gene 1500005I02Rik  
1437891\_at 1.03772 fibroblast growth factor receptor substrate 2 Frs2  
1437892\_at 1.37330 zinc finger protein 306 Zfp306  
1437893\_at 0.89902 phospholipase B1 /// cDNA sequence BC033606 /// similar to phospholipase  
B Pib1 /// BC033606 /// LOC665270  
1437894\_at 0.92631 prospero-related homeobox 1 Prox1  
1437895\_at 0.74108 transmembrane protein 16H Tmem16h  
1437896\_at 1.27326 Zinc finger CCHC-type and RNA binding motif 1 Zcrb1  
1437897\_at 0.98961 kelch-like 21 (Drosophila) Klhl21  
1437898\_at 0.87952 RIKEN cDNA C920009B18 gene C920009B18Rik  
1437899\_at 0.88798 "gene model 776, (NCBI)" Gm776  
1437900\_at 1.12166 RIKEN cDNA 4930523C07 gene 4930523C07Rik  
1437901\_a\_at 0.98188 vacuolar protein sorting 41 (yeast) Vps41  
1437902\_s\_at 0.90776 retinoic acid receptor responder (tazarotene induced) 2 Rarres2  
1437903\_at 0.84852 lysyl oxidase Lox  
1437904\_at 0.93394 developmentally regulated RNA binding protein 1 Drbp1  
1437905\_at 1.09767 thioredoxin-like 1 Txnl1  
1437906\_x\_at 1.04367 thioredoxin-like 1 Txnl1  
1437907\_a\_at 1.04254 tubulin cofactor a Tbca  
1437908\_a\_at 0.87698 RIKEN cDNA 1200007D18 gene 1200007D18Rik  
1437909\_at 1.01298 RIKEN cDNA D030022P06 gene D030022P06Rik

1437910\_at 0.99733 transmembrane protein 39b Tmem39b  
1437911\_at 0.95920 RIKEN cDNA 6330416L07 gene 6330416L07Rik  
1437912\_at 0.95760 IQ motif and Sec7 domain 3 Iqsec3  
1437913\_at 0.97593 B-cell leukemia/lymphoma 2 related protein A1a /// B-cell leukemia/lymphoma  
2 related protein A1b /// B-cell leukemia/lymphoma 2 related protein A1d Bcl2a1a /// Bcl2a1b ///  
Bcl2a1d  
1437914\_at 1.07810 E2F transcription factor 6 E2f6  
1437915\_at 1.15990 target of myb1-like 2 (chicken) Tom112  
1437916\_at 1.17893 --- ---  
1437917\_at 1.43934 RIKEN cDNA D530037H12 gene D530037H12Rik  
1437918\_at 1.06393 RIKEN cDNA 4930539E08 gene 4930539E08Rik  
1437919\_at 1.44196 "B double prime 1, subunit of RNA polymerase III transcription initiation factor  
IIIB" Bdp1  
1437920\_at 0.92318 Eph receptor A5 Epha5  
1437921\_x\_at 0.87235 zinc finger protein 516 Zfp516  
1437922\_at 1.05709 "DNA segment, Chr 10, ERATO Doi 322, expressed /// similar to mitochondrial  
ribosomal protein L42 /// similar to mitochondrial ribosomal protein L42" D10Ert322e ///  
LOC623346 /// LOC630452  
1437923\_at 1.18079 expressed sequence AI314760 AI314760  
1437924\_at 0.88467 --- ---  
1437925\_at 1.07142 RIKEN cDNA 2210018M03 gene 2210018M03Rik  
1437926\_at 1.06465 "X-prolyl aminopeptidase (aminopeptidase P) 3, putative" Xpnpep3  
1437927\_at 1.00213 "discs, large homolog 2 (Drosophila)" Dlgh2  
1437928\_at 0.88625 protocadherin 12 Pcdh12  
1437929\_at 0.87550 "dapper homolog 2, antagonist of beta-catenin (xenopus)" Dact2  
1437930\_at 1.00114 glycosyltransferase 25 domain containing 2 Glt25d2  
1437931\_at 0.97237 toll-like receptor 12 Tlr12  
1437932\_a\_at 0.95147 claudin 1 Cldn1  
1437933\_at 0.89056 Hedgehog-interacting protein Hhip  
1437934\_at 1.04800 cytotoxic granule-associated RNA binding protein 1 Tia1  
1437935\_at 0.95663 RIKEN cDNA 4930486G11 gene 4930486G11Rik  
1437936\_at 1.04633 RIKEN cDNA 6330534C20 gene 6330534C20Rik  
1437937\_at 0.97864 chemokine binding protein 2 Ccbp2  
1437938\_x\_at 1.09346 dynamin 2 Dnm2  
1437939\_s\_at 0.98068 cathepsin C Ctsc  
1437940\_at 0.98309 "amyloid beta (A4) precursor protein binding, family A, member 1" Apba1  
1437941\_at 0.94048 phosphorylase kinase alpha 2 Phka2  
1437942\_x\_at 1.11362 epsilon-tubulin 1 Tube1  
1437943\_s\_at 1.10023 male enhanced antigen 1 Mea1  
1437944\_at 1.09205 Src homology 2 domain-containing transforming protein C2 Shc2  
1437945\_x\_at 0.96710 nucleosome assembly protein 1-like 1 Nap111  
1437946\_x\_at 1.02319 Rap guanine nucleotide exchange factor (GEF) 3 Rapgef3  
1437947\_x\_at 1.00214 voltage-dependent anion channel 1 Vdac1

1437948\_x\_at 0.98910 "eukaryotic translation initiation factor 3, subunit 6 interacting protein"  
Eif3s6ip

1437949\_x\_at 0.98846 zinc finger protein 313 Zfp313

1437950\_at 0.89937 cDNA sequence BC035537 BC035537

1437951\_at 1.02517 RIKEN cDNA 4930429A22 gene 4930429A22Rik

1437952\_at 1.01690 expressed sequence AU040096 AU040096

1437953\_at 1.02327 preimplantation protein 4 Prei4

1437954\_at 1.00051 --- ---

1437955\_at 1.04266 RIKEN cDNA 4922504M18 gene 4922504M18Rik

1437956\_at 0.94032 expressed sequence BB220380 BB220380

1437957\_at 1.23328 RIKEN cDNA 7030407O06 gene 7030407O06Rik

1437958\_at 0.82747 xenotropic and polytropic retrovirus receptor 1 Xpr1

1437959\_at 1.12466 zinc finger protein 324 Zfp324

1437960\_at 1.01349 calpain 13 Capn13

1437961\_x\_at 0.83454 Expressed sequence AA407659 AA407659

1437962\_at 1.04950 "gene model 443, (NCBI)" Gm443

1437963\_at 1.07481 RIKEN cDNA C530045E16 gene C530045E16Rik

1437964\_at 0.94189 neurexophilin 2 Nxph2

1437965\_at 1.25962 HEAT repeat containing 1 Heatr1

1437966\_at 0.95402 proline-rich transmembrane protein 3 Prrt3

1437967\_at 0.95315 Transcribed locus ---

1437968\_at 0.94779 "glutamate receptor, ionotropic, NMDA1 (zeta 1)" Grin1

1437969\_s\_at 1.12806 RIKEN cDNA 0610007P22 gene 0610007P22Rik

1437970\_at 0.86435 CDNA sequence BC053401 BC053401

1437971\_at 0.97886 Superkiller viralicidic activity 2-like 2 (S. cerevisiae) Skiv2l2

1437972\_s\_at 1.12713 "splicing factor 3b, subunit 5" Sf3b5

1437973\_at 0.94478 leucine rich repeat neuronal 6C Lrrn6c

1437974\_a\_at 1.02622 hexokinase 1 Hk1

1437975\_a\_at 1.02150 ribosomal protein L23a /// hypothetical gene supported by BC029892 ///  
similar to 60S ribosomal protein L23a /// similar to 60S ribosomal protein L23a /// similar to 60S  
ribosomal protein L23a /// similar to 60S ribosomal protein L23a Rpl23a /// LOC385336 ///  
LOC666448 /// LOC666501 /// LOC666548 /// LOC666738

1437976\_x\_at 1.01135 ribosomal protein L23a Rpl23a

1437977\_at 1.20010 "Small glutamine-rich tetratricopeptide repeat (TPR)-containing, beta" Sgtb

1437978\_at 0.97582 Slit homolog 2 (Drosophila) Slit2

1437979\_at 1.15771 "Zinc finger, CCHC domain containing 2" Zcchc2

1437980\_at 0.93224 RIKEN cDNA 9130230N09 gene 9130230N09Rik

1437981\_x\_at 1.00856 RIKEN cDNA 1110057K04 gene 1110057K04Rik

1437982\_x\_at 1.00152 "COX15 homolog, cytochrome c oxidase assembly protein (yeast)" Cox15

1437983\_at 0.82419 --- ---

1437984\_x\_at 0.99342 HLA-B-associated transcript 1A Bat1a

1437985\_a\_at 1.07549 RIKEN cDNA 2310061I04 gene 2310061I04Rik

1437986\_x\_at 0.91351 fucokinase Fuk

1437987\_at 0.92940 --- ---  
1437988\_x\_at 1.05399 RIKEN cDNA 1700003E24 gene 1700003E24Rik  
1437989\_at 0.95642 phosphodiesterase 8B Pde8b  
1437990\_x\_at 1.03773 "hemoglobin Z, beta-like embryonic chain" Hbb-bh1  
1437991\_x\_at 1.00034 RUN and SH3 domain containing 1 Rusc1  
1437992\_x\_at 0.92240 gap junction membrane channel protein alpha 1 Gja1  
1437993\_x\_at 1.03952 quinoid dihydropteridine reductase Qdpr  
1437994\_x\_at 1.00222 "mesoderm induction early response 1, family member 2" Mier2  
1437995\_x\_at 0.96993 septin 7 7-Sep  
1437996\_s\_at 1.01549 RIKEN cDNA 1500012D20 gene 1500012D20Rik  
1437997\_x\_at 1.06515 mitochondrial ribosomal protein L48 Mrpl48  
1437998\_at 0.99300 "Adaptor-related protein complex 1, sigma 2 subunit" Ap1s2  
1437999\_x\_at 0.96126 "phosphatidylinositol glycan anchor biosynthesis, class Q" Pigq  
1438000\_x\_at 0.99771 zinc finger protein 622 Zfp622  
1438001\_x\_at 0.93865 receptor accessory protein 5 Reep5  
1438002\_at 0.90774 --- ---  
1438003\_at 1.03148 polymerase (DNA directed) sigma Pols  
1438004\_at 1.01377 polymerase (DNA directed) sigma Pols  
1438005\_at 0.92962 RIKEN cDNA B230315F11 gene B230315F11Rik  
1438006\_at 1.02162 RIKEN cDNA 4933439F18 gene 4933439F18Rik  
1438007\_at 0.89254 expressed sequence AI851790 AI851790  
1438008\_at 0.88527 "Golgi associated, gamma adaptin ear containing, ARF binding protein 3" Gga3  
1438009\_at 1.10414 similar to histone 2a MGC73635  
1438010\_at 0.96498 "DNA segment, Chr 4, ERATO Doi 429, expressed" D4Ertd429e  
1438011\_at 0.98575 "phosphate cytidylyltransferase 1, choline, alpha isoform" Pcyt1a  
1438012\_at 1.03990 protein phosphatase 1 (formerly 2C)-like Ppm1l  
1438013\_x\_at 0.89881 DEAH (Asp-Glu-Ala-His) box polypeptide 32 Dhx32  
1438014\_at 0.79326 mitochondrial ribosomal protein L34 Mrpl34  
1438015\_at 1.17263 cDNA sequence BC068171 BC068171  
1438016\_at 1.24173 cDNA sequence BC068171 BC068171  
1438017\_at 0.99392 RUN and SH3 domain containing 1 Rusc1  
1438018\_at 0.95735 hook homolog 1 (Drosophila) Hook1  
1438019\_at 1.03796 "inositol 1,3,4,5,6-pentakisphosphate 2-kinase" Ippk  
1438020\_at 1.14410 hyaluronan and proteoglycan link protein 1 Hapln1  
1438021\_at 0.92354 cDNA sequence BC013481 BC013481  
1438022\_at 0.96413 RAB11 family interacting protein 3 (class II) Rab11fip3  
1438023\_at 0.86485 spermatogenesis associated 6 Spata6  
1438024\_at 0.85808 RIKEN cDNA 6230416A05 gene 6230416A05Rik  
1438025\_at 1.05505 mitochondrial translational release factor 1-like Mtrf1l  
1438026\_at 0.92627 zinc finger protein 560 Zfp560  
1438027\_at 1.30641 --- ---  
1438028\_at 1.04913 RIKEN cDNA 4930535B03 gene 4930535B03Rik  
1438029\_at 0.90403 RIKEN cDNA 4930535B03 gene 4930535B03Rik

|              |         |                                                                                                                    |               |
|--------------|---------|--------------------------------------------------------------------------------------------------------------------|---------------|
| 1438030_at   | 0.87982 | "RAS, guanyl releasing protein 3"                                                                                  | Rasgrp3       |
| 1438031_at   | 1.05264 | "RAS, guanyl releasing protein 3"                                                                                  | Rasgrp3       |
| 1438032_at   | 0.86003 | leucine-rich repeats and calponin homology (CH) domain containing 1                                                | Lrch1         |
| 1438033_at   | 1.03801 | thyrotroph embryonic factor                                                                                        | Tef           |
| 1438034_at   | 0.90895 | RIKEN cDNA 2410005O16 gene                                                                                         | 2410005O16Rik |
| 1438035_at   | 0.85723 | expressed sequence AW061290                                                                                        | AW061290      |
| 1438036_x_at | 0.88348 | expressed sequence AW061290                                                                                        | AW061290      |
| 1438037_at   | 1.02457 | hect domain and RLD 5                                                                                              | Herc5         |
| 1438038_at   | 0.85071 | RIKEN cDNA 4930402H24 gene                                                                                         | 4930402H24Rik |
| 1438039_at   | 0.97646 | HECT domain containing 1                                                                                           | Hectd1        |
| 1438040_a_at | 0.90944 | "heat shock protein 90kDa beta (Grp94), member 1"                                                                  | Hsp90b1       |
| 1438041_at   | 1.20659 | ---                                                                                                                | ---           |
| 1438042_at   | 0.76603 | short stature homeobox 2                                                                                           | Shox2         |
| 1438043_at   | 1.04158 | "eukaryotic translation initiation factor 2C, 2"                                                                   | Eif2c2        |
| 1438044_at   | 1.02043 | RIKEN cDNA 1700047M11 gene                                                                                         | 1700047M11Rik |
| 1438045_at   | 0.89620 | early endosome antigen 1                                                                                           | Eea1          |
| 1438046_at   | 0.99116 | expressed sequence AU019823                                                                                        | AU019823      |
| 1438047_at   | 1.02228 | zinc finger protein 384                                                                                            | Zfp384        |
| 1438048_at   | 1.02250 | myc target 1                                                                                                       | Myct1         |
| 1438049_at   | 1.99117 | RIKEN cDNA A430108E01 gene                                                                                         | A430108E01Rik |
| 1438050_x_at | 0.97955 | ---                                                                                                                | ---           |
| 1438051_at   | 0.85507 | tetratricopeptide repeat domain 14                                                                                 | Ttc14         |
| 1438052_at   | 1.02086 | RIKEN cDNA A130071D04 gene                                                                                         | A130071D04Rik |
| 1438053_at   | 0.95877 | Trk-fused gene                                                                                                     | Tfg           |
| 1438054_x_at | 1.01965 | "protein phosphatase 2 (formerly 2A), regulatory subunit B (PR 52), gamma isoform"                                 | Ppp2r2c       |
| 1438055_at   | 1.04319 | retinoic acid receptor responder (tazarotene induced) 1                                                            | Rarres1       |
| 1438056_x_at | 1.00063 | "ATP-binding cassette, sub-family C (CFTR/MRP), member 5"                                                          | Abcc5         |
| 1438057_at   | 0.99744 | Transcribed locus                                                                                                  | ---           |
| 1438058_s_at | 0.80434 | prostate tumor over expressed gene 1                                                                               | Ptov1         |
| 1438059_at   | 1.13474 | similar to Cortexin-1                                                                                              | LOC629147     |
| 1438060_at   | 0.89764 | neuronal PAS domain protein 3                                                                                      | Npas3         |
| 1438061_at   | 1.00081 | RIKEN cDNA 4930523C07 gene                                                                                         | 4930523C07Rik |
| 1438062_at   | 0.98123 | RIKEN cDNA 4832420A03 gene                                                                                         | 4832420A03Rik |
| 1438063_at   | 0.99201 | M-phase phosphoprotein 9                                                                                           | Mphosph9      |
| 1438064_at   | 1.44910 | Y box protein 1                                                                                                    | Ybx1          |
| 1438065_at   | 1.14635 | ---                                                                                                                | ---           |
| 1438066_at   | 1.02914 | General transcription factor IIB                                                                                   | Gtf2b         |
| 1438067_at   | 1.18525 | neurofibromatosis 1                                                                                                | Nf1           |
| 1438068_at   | 0.81506 | "Transcribed locus, strongly similar to XP_579813.1 PREDICTED: hypothetical protein XP_579813 [Rattus norvegicus]" | ---           |
| 1438069_a_at | 1.06734 | RNA binding motif protein 5                                                                                        | Rbm5          |
| 1438070_at   | 0.83979 | PHD finger protein 3                                                                                               | Phf3          |



1438071\_at 1.03437 postmeiotic segregation increased 1 (S. cerevisiae) Pms1  
1438072\_at 2.96479 Nuclear factor I/B Nfib  
1438073\_at 0.86917 sprouty homolog 3 (Drosophila) Spry3  
1438074\_at 0.94721 RIKEN cDNA 2210010C17 gene 2210010C17Rik  
1438075\_at 0.88273 fem-1 homolog c (C.elegans) Fem1c  
1438076\_at 1.09334 ribosomal protein L30 Rpl30  
1438077\_at 0.93848 "NACHT, leucine rich repeat and PYD containing 4A" Nalp4a  
1438078\_at 1.07111 Transcribed locus ---  
1438079\_at 1.26008 cDNA sequence BC050078 BC050078  
1438080\_at 0.92890 mitochondrial ribosomal protein L11 Mrpl11  
1438081\_at 0.92416 mutated in colorectal cancers Mcc  
1438082\_at 0.87629 RIKEN cDNA 2310028N02 gene 2310028N02Rik  
1438083\_at 1.05405 Hedgehog-interacting protein Hhip  
1438084\_at 1.01636 A disintegrin and metallopeptidase domain 23 Adam23  
1438085\_at 0.80202 "RIKEN cDNA A230048G03 gene /// similar to CG2747-PB, isoform B"  
A230048G03Rik /// LOC670614  
1438086\_at 0.94856 neuropeptide Y receptor Y6 Npy6r  
1438087\_at 0.87811 thiopurine methyltransferase Tpm1  
1438088\_at 0.89042 "Adult male cecum cDNA, RIKEN full-length enriched library,  
clone:9130222J03 product:unclassifiable, full insert sequence" ---  
1438089\_a\_at 1.15884 BCL2-associated transcription factor 1 Bclaf1  
1438090\_x\_at 0.95879 ankyrin repeat domain 54 Ankrd54  
1438091\_a\_at 1.02489 "H2A histone family, member Z /// similar to H2A histone family, member  
Z /// similar to H2A histone family, member Z" H2afz /// LOC631864 /// LOC675899  
1438092\_x\_at 1.02065 "H2A histone family, member Z /// similar to H2A histone family, member  
Z /// similar to H2A histone family, member Z /// similar to H2A histone family, member Z /// similar to  
H2A histone family, member Z" H2afz /// LOC631864 /// LOC666634 /// LOC669445 /// LOC675899  
1438093\_x\_at 1.21777 diazepam binding inhibitor Dbi  
1438094\_x\_at 1.10908 RIKEN cDNA 2810409H07 gene 2810409H07Rik  
1438095\_x\_at 0.89641 Nucleolar complex associated 4 homolog (S. cerevisiae) Noc4l  
1438096\_a\_at 1.00509 deoxythymidylate kinase Dtymk  
1438097\_at 1.33399 "RAB20, member RAS oncogene family" Rab20  
1438098\_at 0.84435 "discs, large (Drosophila) homolog-associated protein 1" Dlgap1  
1438099\_at 0.88560 triple functional domain (PTPRF interacting) Trio  
1438100\_at 1.00118 RIKEN cDNA B230208H17 gene B230208H17Rik  
1438101\_at 1.00917 Frizzled homolog 3 (Drosophila) Fzd3  
1438102\_at 0.98221 SUMO/sentrin specific peptidase 8 Senp8  
1438103\_at 1.03120 "protocadherin gamma subfamily C, 4" Pcdhgc4  
1438104\_at 1.24721 --- ---  
1438105\_at 0.97660 hypothetical protein LOC632686 LOC632687  
1438106\_at 0.91300 protocadherin beta 22 Pcdhb22  
1438107\_x\_at 0.97067 expressed sequence BB236558 BB236558  
1438108\_at 1.12215 RIKEN cDNA 9430067K14 gene 9430067K14Rik

|              |                                                                                                                                                                                                                                                                                                                                                                                                                                                                                                                                                                                                                                                                                                             |                                                                                                                                                       |
|--------------|-------------------------------------------------------------------------------------------------------------------------------------------------------------------------------------------------------------------------------------------------------------------------------------------------------------------------------------------------------------------------------------------------------------------------------------------------------------------------------------------------------------------------------------------------------------------------------------------------------------------------------------------------------------------------------------------------------------|-------------------------------------------------------------------------------------------------------------------------------------------------------|
| 1438109_at   | 0.96589 chloride channel calcium activated 5                                                                                                                                                                                                                                                                                                                                                                                                                                                                                                                                                                                                                                                                | Clca5                                                                                                                                                 |
| 1438110_at   | 1.20625 Zinc finger and BTB domain containing 1                                                                                                                                                                                                                                                                                                                                                                                                                                                                                                                                                                                                                                                             | Zbtb1                                                                                                                                                 |
| 1438111_at   | 1.02648 Poliovirus receptor-related 1                                                                                                                                                                                                                                                                                                                                                                                                                                                                                                                                                                                                                                                                       | Pvr1                                                                                                                                                  |
| 1438112_at   | 0.84207 RIKEN cDNA 9430021M05 gene                                                                                                                                                                                                                                                                                                                                                                                                                                                                                                                                                                                                                                                                          | 9430021M05Rik                                                                                                                                         |
| 1438113_at   | 0.83679 "zinc finger, matrin type 4"                                                                                                                                                                                                                                                                                                                                                                                                                                                                                                                                                                                                                                                                        | Zmat4                                                                                                                                                 |
| 1438114_x_at | 0.95994 Embryonal Fyn-associated substrate                                                                                                                                                                                                                                                                                                                                                                                                                                                                                                                                                                                                                                                                  | Efs                                                                                                                                                   |
| 1438115_a_at | 0.90859 "solute carrier family 9 (sodium/hydrogen exchanger), isoform 3 regulator 1"                                                                                                                                                                                                                                                                                                                                                                                                                                                                                                                                                                                                                        | Slc9a3r1                                                                                                                                              |
| 1438116_x_at | 0.91441 "solute carrier family 9 (sodium/hydrogen exchanger), isoform 3 regulator 1"                                                                                                                                                                                                                                                                                                                                                                                                                                                                                                                                                                                                                        | Slc9a3r1                                                                                                                                              |
| 1438117_x_at | 0.96255 transmembrane protein 41B                                                                                                                                                                                                                                                                                                                                                                                                                                                                                                                                                                                                                                                                           | Tmem41b                                                                                                                                               |
| 1438118_x_at | 1.01334 vimentin                                                                                                                                                                                                                                                                                                                                                                                                                                                                                                                                                                                                                                                                                            | Vim                                                                                                                                                   |
| 1438119_at   | 1.15625 Integrin beta 1 (fibronectin receptor beta)                                                                                                                                                                                                                                                                                                                                                                                                                                                                                                                                                                                                                                                         | Itgb1                                                                                                                                                 |
| 1438120_x_at | 1.05663 ---                                                                                                                                                                                                                                                                                                                                                                                                                                                                                                                                                                                                                                                                                                 | ---                                                                                                                                                   |
| 1438121_at   | 0.97002 "SEC24 related gene family, member A ( <i>S. cerevisiae</i> )"                                                                                                                                                                                                                                                                                                                                                                                                                                                                                                                                                                                                                                      | Sec24a                                                                                                                                                |
| 1438122_at   | 1.10218 RIKEN cDNA 2900006K08 gene                                                                                                                                                                                                                                                                                                                                                                                                                                                                                                                                                                                                                                                                          | 2900006K08Rik                                                                                                                                         |
| 1438123_at   | 1.07380 ---                                                                                                                                                                                                                                                                                                                                                                                                                                                                                                                                                                                                                                                                                                 | ---                                                                                                                                                   |
| 1438124_at   | 0.88961 similar to putative pheromone receptor (Go-VN5) /// | LOC195691 /// LOC224552 /// LOC224572 /// LOC433070 /// LOC627476 /// LOC637519 /// LOC639943 /// LOC665253 /// LOC665376 /// LOC670484 /// LOC676392 |
| 1438125_at   | 1.02391 RIKEN cDNA C230085N15 gene                                                                                                                                                                                                                                                                                                                                                                                                                                                                                                                                                                                                                                                                          | C230085N15Rik                                                                                                                                         |
| 1438126_at   | 1.21571 exocyst complex component 5                                                                                                                                                                                                                                                                                                                                                                                                                                                                                                                                                                                                                                                                         | Exoc5                                                                                                                                                 |
| 1438127_at   | 1.76814 hypothetical LOC552906                                                                                                                                                                                                                                                                                                                                                                                                                                                                                                                                                                                                                                                                              | LOC552906                                                                                                                                             |
| 1438128_at   | 1.04209 "Guanine nucleotide binding protein, alpha transducing 2"                                                                                                                                                                                                                                                                                                                                                                                                                                                                                                                                                                                                                                           | Gnat2                                                                                                                                                 |
| 1438129_at   | 1.36319 WD repeat and SOCS box-containing 2                                                                                                                                                                                                                                                                                                                                                                                                                                                                                                                                                                                                                                                                 | Wsb2                                                                                                                                                  |
| 1438130_at   | 2.14654 "TAF15 RNA polymerase II, TATA box binding protein (TBP)-associated factor"                                                                                                                                                                                                                                                                                                                                                                                                                                                                                                                                                                                                                         | Taf15                                                                                                                                                 |
| 1438131_at   | 1.18356 F-box and WD-40 domain protein 2                                                                                                                                                                                                                                                                                                                                                                                                                                                                                                                                                                                                                                                                    | Fbxw2                                                                                                                                                 |
| 1438132_at   | 1.09370 RIKEN cDNA C030005G22 gene                                                                                                                                                                                                                                                                                                                                                                                                                                                                                                                                                                                                                                                                          | C030005G22Rik                                                                                                                                         |
| 1438133_a_at | 0.69729 cysteine rich protein 61                                                                                                                                                                                                                                                                                                                                                                                                                                                                                                                                                                                                                                                                            | Cyr61                                                                                                                                                 |
| 1438134_at   | 1.01689 protocadherin 10                                                                                                                                                                                                                                                                                                                                                                                                                                                                                                                                                                                                                                                                                    | Pcdh10                                                                                                                                                |
| 1438135_at   | 1.06004 RIKEN cDNA E130114P18 gene                                                                                                                                                                                                                                                                                                                                                                                                                                                                                                                                                                                                                                                                          | E130114P18Rik                                                                                                                                         |
| 1438136_at   | 1.20749 astacin-like metalloendopeptidase (M12 family)                                                                                                                                                                                                                                                                                                                                                                                                                                                                                                                                                                                                                                                      | Astl                                                                                                                                                  |
| 1438137_at   | 1.02679 RIKEN cDNA 2810055G22 gene                                                                                                                                                                                                                                                                                                                                                                                                                                                                                                                                                                                                                                                                          | 2810055G22Rik                                                                                                                                         |
| 1438138_a_at | 0.94901 peroxisomal biogenesis factor 6                                                                                                                                                                                                                                                                                                                                                                                                                                                                                                                                                                                                                                                                     | Pex6                                                                                                                                                  |
| 1438139_at   | 0.93590 Rho GTPase activating protein 28                                                                                                                                                                                                                                                                                                                                                                                                                                                                                                                                                                                                                                                                    | Arhgap28                                                                                                                                              |
| 1438140_a_at | 0.93182 zinc finger protein 64                                                                                                                                                                                                                                                                                                                                                                                                                                                                                                                                                                                                                                                                              | Zfp64                                                                                                                                                 |
| 1438141_at   | 0.91998 cDNA sequence BC029684                                                                                                                                                                                                                                                                                                                                                                                                                                                                                                                                                                                                                                                                              | BC029684                                                                                                                                              |

1438142\_s\_at 1.00655 RIKEN cDNA 1700021K14 gene 1700021K14Rik  
1438143\_s\_at 0.99458 ataxin 2 Atxn2  
1438144\_x\_at 0.98725 ataxin 2 Atxn2  
1438145\_at 1.01184 "SPT2, Suppressor of Ty, domain containing 1 (S. cerevisiae)" Spty2d1  
1438146\_x\_at 0.88018 "SPT2, Suppressor of Ty, domain containing 1 (S. cerevisiae)" Spty2d1  
1438147\_at 1.14757 "scavenger receptor cysteine rich domain containing, group B (4 domains)" Srcrb4d  
1438148\_at 0.92347 "gene model 1960, (NCBI)" Gm1960  
1438149\_at 1.04856 Expressed sequence AI449441 AI449441  
1438150\_at 1.02566 farnesyl diphosphate synthetase /// similar to farnesyl diphosphate synthetase /// similar to farnesyl diphosphate synthetase Fdps /// LOC544723 /// LOC671145  
1438151\_x\_at 0.91187 "zinc finger, DHHC domain containing 14" Zdhhc14  
1438152\_at 0.96674 GPI anchor attachment protein 1 Gpaal  
1438153\_x\_at 0.86452 coenzyme Q10 homolog A (yeast) Coq10a  
1438154\_x\_at 1.06871 RIKEN cDNA 2610002J02 gene 2610002J02Rik  
1438155\_x\_at 0.90721 "phosphatidylinositol glycan anchor biosynthesis, class O" Pigo  
1438156\_x\_at 0.85646 "carnitine palmitoyltransferase 1a, liver" Cpt1a  
1438157\_s\_at 1.49977 "nuclear factor of kappa light chain gene enhancer in B-cells inhibitor, alpha" Nfkbia  
1438158\_at 0.96644 --- ---  
1438159\_x\_at 0.93528 NADH dehydrogenase (ubiquinone) flavoprotein 2 Ndufv2  
1438160\_x\_at 1.19866 "solute carrier organic anion transporter family, member 4a1" Slco4a1  
1438161\_s\_at 0.95507 replication factor C (activator 1) 4 Rfc4  
1438162\_x\_at 0.99788 hypothetical LOC231885 /// hypothetical protein LOC670882  
LOC231885 /// LOC670882  
1438163\_x\_at 0.90803 Rhomboid domain containing 2 Rhbdd2  
1438164\_x\_at 0.87944 flotillin 2 Flot2  
1438165\_x\_at 1.02573 vesicle amine transport protein 1 homolog (T californica) Vat1  
1438166\_x\_at 0.88278 NADH dehydrogenase (ubiquinone) Fe-S protein 4 Ndufs4  
1438167\_x\_at 1.05516 Folliculin Flcn  
1438168\_x\_at 1.15406 DEAD (Asp-Glu-Ala-Asp) box polypeptide 39 Ddx39  
1438169\_a\_at 0.84103 FERM domain containing 4B Frmd4b  
1438170\_x\_at 0.97561 adhesion regulating molecule 1 Adrm1  
1438171\_x\_at 1.02266 methyltransferase like 9 Mettl9  
1438172\_x\_at 1.00372 exonuclease domain containing 1 Exod1  
1438173\_x\_at 0.99821 Polyamine-modulated factor 1 Pmf1  
1438174\_x\_at 0.92465 "protein phosphatase 2 (formerly 2A), regulatory subunit A (PR 65), alpha isoform" Ppp2r1a  
1438175\_x\_at 1.87810 myomesin 2 Myom2  
1438176\_x\_at 0.97741 RIKEN cDNA 1110031B06 gene 1110031B06Rik  
1438177\_x\_at 0.98003 ectonucleoside triphosphate diphosphohydrolase 4 Entpd4  
1438178\_x\_at 1.02841 "ATPase family, AAA domain containing 3A" Atad3a  
1438179\_s\_at 0.99158 Signal transducer and activator of transcription interacting protein 1 Statip1

|              |                                                                                                                                |                  |
|--------------|--------------------------------------------------------------------------------------------------------------------------------|------------------|
| 1438180_x_at | 0.96921 silica-induced gene 111 /// HCLS1 associated X-1                                                                       | Silg111 /// Hax1 |
| 1438181_x_at | 0.89056 TM2 domain containing 2 Tm2d2                                                                                          |                  |
| 1438182_x_at | 0.94970 ankyrin repeat and SOCS box-containing protein 6                                                                       | Asb6             |
| 1438183_x_at | 0.94664 sorbitol dehydrogenase Sord                                                                                            |                  |
| 1438184_a_at | 1.00354 ankyrin repeat domain 5 Ankrd5                                                                                         |                  |
| 1438185_at   | 1.05341 --- ---                                                                                                                |                  |
| 1438186_at   | 1.38813 PDZ and LIM domain 5 Pdlim5                                                                                            |                  |
| 1438187_at   | 1.12052 "solute carrier family 25 (mitochondrial carrier, palmitoylcarnitine transporter), member 29"                          | Slc25a29         |
| 1438188_x_at | 0.95078 "solute carrier family 25 (mitochondrial carrier, palmitoylcarnitine transporter), member 29"                          | Slc25a29         |
| 1438189_s_at | 1.11560 erythrocyte protein band 4.9 Epb4.9                                                                                    |                  |
| 1438190_x_at | 1.03241 trophoblast specific protein alpha Tpbpa                                                                               |                  |
| 1438191_a_at | 0.93783 ring finger protein 40 Rnf40                                                                                           |                  |
| 1438192_s_at | 1.10569 "bromodomain adjacent to zinc finger domain, 2A"                                                                       | Baz2a            |
| 1438193_at   | 0.89314 neurexin III Nrnx3                                                                                                     |                  |
| 1438194_at   | 1.16625 RIKEN cDNA 2900019G14 gene                                                                                             | 2900019G14Rik    |
| 1438195_at   | 0.84930 glycerol-3-phosphate dehydrogenase 1-like /// similar to glycerol-3-phosphate dehydrogenase 1-like Gpd11 /// LOC672508 |                  |
| 1438196_at   | 0.78447 glycerol-3-phosphate dehydrogenase 1-like                                                                              | Gpd11            |
| 1438197_at   | 0.96551 "vezatin, adherens junctions transmembrane protein"                                                                    | Vezt             |
| 1438198_at   | 0.95183 Bri3 binding protein Bri3bp                                                                                            |                  |
| 1438199_at   | 0.87153 expressed sequence AI316807                                                                                            | AI316807         |
| 1438200_at   | 0.94512 sulfatase 1 Sulf1                                                                                                      |                  |
| 1438201_at   | 0.91795 "protein phosphatase 2C, magnesium dependent, catalytic subunit"                                                       | Ppm2c            |
| 1438202_at   | 1.05247 RIKEN cDNA C920005C14 gene                                                                                             | C920005C14Rik    |
| 1438203_at   | 0.90937 "scavenger receptor class F, member 2"                                                                                 | Scarf2           |
| 1438204_at   | 1.00584 "histone 1, H1c"                                                                                                       | Hist1h1c         |
| 1438205_at   | 0.92768 RIKEN cDNA 1110014N23 gene                                                                                             | 1110014N23Rik    |
| 1438206_a_at | 0.96021 RIKEN cDNA 2610042O14 gene                                                                                             | 2610042O14Rik    |
| 1438207_at   | 1.12337 golgi-specific brefeldin A-resistance factor 1 Gbf1                                                                    |                  |
| 1438208_at   | 0.85403 TAO kinase 2 Taok2                                                                                                     |                  |
| 1438209_at   | 1.03337 RIKEN cDNA 4632404H12 gene                                                                                             | 4632404H12Rik    |
| 1438210_at   | 1.03011 G protein-coupled receptor 149 Gpr149                                                                                  |                  |
| 1438211_s_at | 0.65431 D site albumin promoter binding protein Dbp                                                                            |                  |
| 1438212_at   | 0.99095 ubiquitin specific peptidase 37 Usp37                                                                                  |                  |
| 1438213_at   | 0.99012 RIKEN cDNA A830018L16 gene                                                                                             | A830018L16Rik    |
| 1438214_at   | 0.81699 trichorhinophalangeal syndrome I (human)                                                                               | Trps1            |
| 1438215_at   | 0.88249 --- ---                                                                                                                |                  |
| 1438216_at   | 0.90971 ras responsive element binding protein 1                                                                               | Rreb1            |
| 1438217_at   | 0.91811 ataxin 2 binding protein 1 A2bp1                                                                                       |                  |
| 1438218_at   | 0.80870 zinc finger and BTB domain containing 24                                                                               | Zbtb24           |
| 1438219_at   | 0.81295 Purine rich element binding protein A Pura                                                                             |                  |

|              |                                                                                                                                                                                                                                                                                        |                                  |
|--------------|----------------------------------------------------------------------------------------------------------------------------------------------------------------------------------------------------------------------------------------------------------------------------------------|----------------------------------|
| 1438220_at   | 1.18604 forkhead box J3 Foxj3                                                                                                                                                                                                                                                          |                                  |
| 1438221_at   | 1.14630 RIKEN cDNA C130065N10 gene                                                                                                                                                                                                                                                     | C130065N10Rik                    |
| 1438222_at   | 2.24137 "DNA segment, Chr 2, ERATO Doi 612, expressed"                                                                                                                                                                                                                                 | D2Ertd612e                       |
| 1438223_at   | 1.07610 Vacuolar protein sorting 54 (yeast)                                                                                                                                                                                                                                            | Vps54                            |
| 1438224_at   | 0.83914 "zinc finger, SWIM domain containing 5"                                                                                                                                                                                                                                        | Zswim5                           |
| 1438225_x_at | 1.05220 translocating chain-associating membrane protein 1                                                                                                                                                                                                                             | Tram1                            |
| 1438226_at   | 1.04918 expressed sequence AU022252                                                                                                                                                                                                                                                    | AU022252                         |
| 1438227_at   | 0.97900 src homology 2 domain-containing transforming protein E                                                                                                                                                                                                                        | She                              |
| 1438228_at   | 0.94985 RIKEN cDNA 4930452B06 gene                                                                                                                                                                                                                                                     | 4930452B06Rik                    |
| 1438229_at   | 1.08882 "protein geranylgeranyltransferase type I, beta subunit"                                                                                                                                                                                                                       | Pggt1b                           |
| 1438230_at   | 1.09690 "protein geranylgeranyltransferase type I, beta subunit"                                                                                                                                                                                                                       | Pggt1b                           |
| 1438231_at   | 0.59932 forkhead box P2 Foxp2                                                                                                                                                                                                                                                          |                                  |
| 1438232_at   | 0.58125 forkhead box P2 Foxp2                                                                                                                                                                                                                                                          |                                  |
| 1438233_at   | 1.27119 RIKEN cDNA 6030443O07 gene                                                                                                                                                                                                                                                     | 6030443O07Rik                    |
| 1438234_at   | 1.93569 WD repeat domain 26                                                                                                                                                                                                                                                            | Wdr26                            |
| 1438235_at   | 1.71056 --- ---                                                                                                                                                                                                                                                                        |                                  |
| 1438236_at   | 0.70476 nuclear factor I/A                                                                                                                                                                                                                                                             | Nfia                             |
| 1438237_at   | 0.95501 reduced expression 2                                                                                                                                                                                                                                                           | Rex2                             |
| 1438238_at   | 0.93291 RIKEN cDNA 2010315B03 gene                                                                                                                                                                                                                                                     | 2010315B03Rik                    |
| 1438239_at   | 2.61001 midline 1                                                                                                                                                                                                                                                                      | Mid1                             |
| 1438240_at   | 0.92360 calicin Ccin                                                                                                                                                                                                                                                                   |                                  |
| 1438241_at   | 0.85715 "RGM domain family, member A"                                                                                                                                                                                                                                                  | Rgma                             |
| 1438242_at   | 0.90792 ubiquitin specific peptidase 40                                                                                                                                                                                                                                                | Usp40                            |
| 1438243_at   | 0.93310 --- ---                                                                                                                                                                                                                                                                        |                                  |
| 1438244_at   | 2.03192 nuclear factor I/B                                                                                                                                                                                                                                                             | Nfib                             |
| 1438245_at   | 1.84362 --- ---                                                                                                                                                                                                                                                                        |                                  |
| 1438246_at   | 1.03156 "casein kinase 1, gamma 1"                                                                                                                                                                                                                                                     | Csnk1g1                          |
| 1438247_at   | 0.78445 kelch-like 15 (Drosophila)                                                                                                                                                                                                                                                     | Klhl15                           |
| 1438248_at   | 0.92615 proprotein convertase subtilisin/kexin type 5                                                                                                                                                                                                                                  | Pcsk5                            |
| 1438249_at   | 1.44225 Ubiquitin specific peptidase 7                                                                                                                                                                                                                                                 | Usp7                             |
| 1438250_s_at | 1.01464 "TAF9 RNA polymerase II, TATA box binding protein (TBP)-associated factor /// similar to TAF9 RNA polymerase II, TATA box binding protein (TBP)-associated factor isoform 1 /// similar to TAF9 RNA polymerase II, TATA box binding protein (TBP)-associated factor isoform 1" | Taf9 /// LOC545600 /// LOC671012 |
| 1438251_x_at | 0.70637 HtrA serine peptidase 1                                                                                                                                                                                                                                                        | Htra1                            |
| 1438252_at   | 1.05754 quiescin Q6                                                                                                                                                                                                                                                                    | Qscn6                            |
| 1438253_at   | 1.00756 slingshot homolog 1 (Drosophila)                                                                                                                                                                                                                                               | Ssh1                             |
| 1438254_at   | 1.08616 RIKEN cDNA 1110007A13 gene                                                                                                                                                                                                                                                     | 1110007A13Rik                    |
| 1438255_at   | 0.82002 checkpoint suppressor 1                                                                                                                                                                                                                                                        | Ches1                            |
| 1438256_at   | 1.04666 eukaryotic translation initiation factor 5A2                                                                                                                                                                                                                                   | Eif5a2                           |
| 1438257_at   | 1.32672 Zinc finger protein 313                                                                                                                                                                                                                                                        | Zfp313                           |
| 1438258_at   | 1.03544 very low density lipoprotein receptor                                                                                                                                                                                                                                          | Vldlr                            |
| 1438259_at   | 1.60389 --- ---                                                                                                                                                                                                                                                                        |                                  |

1438260\_at 0.90547 "potassium voltage-gated channel, subfamily Q, member 2" Kcnq2  
 1438261\_at 1.05506 "Cbp/p300-interacting transactivator, with Glu/Asp-rich carboxy-terminal domain, 4" Cited4  
 1438262\_at 0.98281 "solute carrier family 8 (sodium/calcium exchanger), member 2" Slc8a2  
 1438263\_at 0.82372 RIKEN cDNA 9430020K01 gene 9430020K01Rik  
 1438264\_a\_at 1.10179 tripeptidyl peptidase II Tpp2  
 1438265\_at 1.71636 --- ---  
 1438266\_at 0.99692 ADAMTS-like 5 Adamtsl5  
 1438267\_x\_at 1.02659 ribonucleic acid binding protein S1 Rnps1  
 1438268\_at 1.24482 membrane associated DNA binding protein Mnab  
 1438269\_at 1.27557 zinc finger and BTB domain containing 38 Zbtb38  
 1438270\_at 0.95605 expressed sequence AI846148 AI846148  
 1438271\_at 0.90097 LIM domain containing preferred translocation partner in lipoma Lpp  
 1438272\_at 0.89754 CUB and Sushi multiple domains 3 Csm3  
 1438273\_at 0.91070 --- ---  
 1438274\_at 1.03410 "zinc finger protein, subfamily 1A, 4 (Eos)" Zfpn1a4  
 1438275\_at 0.94044 RIKEN cDNA C130046K22 gene C130046K22Rik  
 1438276\_at 1.10666 Nuclear receptor co-repressor 1 Ncor1  
 1438277\_at 1.24233 RIKEN cDNA E130308A19 gene E130308A19Rik  
 1438278\_a\_at 1.20193 cDNA sequence BC003993 BC003993  
 1438279\_at 0.91647 Dipeptidylpeptidase 4 Dpp4  
 1438280\_at 1.09641 RIKEN cDNA 1700023L04 gene 1700023L04Rik  
 1438281\_x\_at 1.00698 RIKEN cDNA 1700023L04 gene 1700023L04Rik  
 1438282\_at 0.95162 synaptotagmin I Syt1  
 1438283\_at 1.06072 RIKEN cDNA 3110057O12 gene 3110057O12Rik  
 1438284\_at 1.16060 oculocerebrorenal syndrome of Lowe Ocl1  
 1438285\_at 0.98965 RIKEN cDNA 2210015D19 gene 2210015D19Rik  
 1438286\_at 1.03118 Thyroid hormone receptor associated protein 3 Thrap3  
 1438287\_x\_at 1.06060 DEAD (Asp-Glu-Ala-Asp) box polypeptide 39 Ddx39  
 1438288\_x\_at 0.97894 RIKEN cDNA 1110059G02 gene 1110059G02Rik  
 1438289\_a\_at 1.00911 SMT3 suppressor of mif two 3 homolog 1 (yeast) Sumo1  
 1438290\_x\_at 0.97368 Surfactant associated protein C Sftpc  
 1438291\_x\_at 0.99526 ribosomal protein L37 /// similar to ribosomal protein L37 Rpl37 ///  
 LOC383438  
 1438292\_x\_at 1.02956 adenosine kinase Adk  
 1438293\_at 1.17888 "trichoplein, keratin filament binding" Tchp  
 1438294\_at 0.87713 ataxin 1 Atxn1  
 1438295\_at 0.98431 Glucocorticoid induced transcript 1 Glcci1  
 1438296\_at 1.07135 hypothetical protein C430010C01 C430010C01  
 1438297\_at 1.20716 EST AA545190 AA545190  
 1438298\_a\_at 1.07584 --- ---  
 1438299\_at 1.34114 RIKEN cDNA 3100002L24 gene /// RIKEN cDNA 9230108I15 gene /// similar to gonadotropin inducible ovarian transcription factor 1 /// similar to zinc finger protein 709 /// similar to

zinc finger protein 709 /// similar to zinc finger protein 709 /// similar to zinc finger protein 97  
3100002L24Rik /// 9230108I15Rik /// LOC626832 /// LOC628147 /// LOC665043 /// LOC665078 ///  
LOC668039

1438300\_at 0.94308 RIKEN cDNA 4921511I16 gene 4921511I16Rik  
1438301\_at 1.68897 Development and differentiation enhancing Ddef1  
1438302\_at 1.01141 HCF-binding transcription factor Zhangfei Zf  
1438303\_at 0.84353 "transforming growth factor, beta 2" Tgfb2  
1438304\_at 1.00680 CXXC finger 4 Cxxc4  
1438305\_at 0.92692 regulating synaptic membrane exocytosis 1 Rims1  
1438306\_at 1.02589 ring finger protein 180 Rnf180  
1438307\_at 0.94649 High mobility group box 2 Hmgb2  
1438308\_at 0.99097 RIKEN cDNA 2310026E23 gene 2310026E23Rik  
1438309\_at 0.99159 Transcribed locus ---  
1438310\_at 1.21145 "10 days neonate cerebellum cDNA, RIKEN full-length enriched library, clone:  
B930095L19 product:unclassifiable, full insert sequence" ---  
1438311\_at 1.06305 RIKEN cDNA 2010002M12 gene 2010002M12Rik  
1438312\_s\_at 0.71683 latent transforming growth factor beta binding protein 3 Ltbp3  
1438313\_at 0.99190 Transcribed locus ---  
1438314\_at 1.00588 PCTAIRE-motif protein kinase 1 Pctk1  
1438315\_x\_at 0.92971 "aldo-keto reductase family 7, member A5 (aflatoxin aldehyde reductase)"  
Akr7a5  
1438316\_a\_at 0.94943 coiled-coil domain containing 102A /// similar to CG31638-PA Ccdc102a ///  
LOC672218

1438317\_a\_at 1.05593 endonuclease G Endog  
1438318\_x\_at 0.98715 "neuroguidin, EIF4E binding protein" Ngdn  
1438319\_x\_at 0.95644 FAST kinase domains 2 Fastkd2  
1438320\_s\_at 0.90853 minichromosome maintenance deficient 7 (S. cerevisiae) Mcm7  
1438321\_x\_at 0.91082 RIKEN cDNA 4930504E06 gene 4930504E06Rik  
1438322\_x\_at 1.35460 farnesyl diphosphate farnesyl transferase 1 Fdft1  
1438323\_at 0.90093 lens intrinsic membrane protein 2 Lim2  
1438324\_at 0.94691 RIKEN cDNA 9330182L06 gene 9330182L06Rik  
1438325\_at 0.80604 ecotropic viral integration site 1 Evi1  
1438326\_at 1.69108 RIKEN cDNA 3300001M20 gene 3300001M20Rik  
1438327\_at 1.05452 Zinc finger protein 533 Zfp533  
1438328\_at 1.01050 host cell factor C2 Hcfc2  
1438329\_at 0.89250 toll-like receptor 12 Tlr12  
1438330\_at 0.94468 cDNA sequence BC065397 BC065397  
1438331\_at 1.13324 Yippee-like 2 (Drosophila) Ypel2  
1438332\_at 1.10165 "solute carrier family 22 (organic anion transporter), member 6" Slc22a6  
1438333\_at 0.97518 protogenin homolog (Gallus gallus) Prtg  
1438334\_at 0.96519 Dedicator of cyto-kinesis 2 Dock2  
1438335\_at 1.13592 RIKEN cDNA 6030413G23 gene 6030413G23Rik  
1438336\_at 1.13183 F-box and WD-40 domain protein 11 Fbxw11

1438337\_x\_at 1.00138 RIKEN cDNA 9930032O22 gene 9930032O22Rik  
1438338\_at 1.10044 "malate dehydrogenase 1, NAD (soluble)" Mdh1  
1438339\_at 0.92378 "Fanconi anemia, complementation group D2" Fancd2  
1438340\_at 0.89602 RIKEN cDNA A930006D11Rik gene A930006D11Rik  
1438341\_at 0.95439 transglutaminase 4 (prostate) Tgm4  
1438342\_at 0.98009 RIKEN cDNA A930025D01 gene A930025D01Rik  
1438343\_at 0.97857 RIKEN cDNA 0610037L13 gene 0610037L13Rik  
1438344\_at 1.07463 RIKEN cDNA 4833424O15 gene 4833424O15Rik  
1438345\_at 1.83980 --- ---  
1438346\_at 0.96461 RIKEN cDNA 4930525G20 gene 4930525G20Rik  
1438347\_at 0.97350 Usher syndrome 3A homolog (human) Ush3a  
1438348\_x\_at 1.07532 cysteine conjugate-beta lyase 1 Ccb1l  
1438349\_at 0.81314 cDNA sequence BC043476 BC043476  
1438350\_at 0.98445 G protein-coupled receptor 64 Gpr64  
1438351\_at 1.04868 "homeo box, msh-like 2" Msx2  
1438352\_at 0.99987 "Microtubule-associated protein, RP/EB family, member 2" Mapre2  
1438353\_at 0.87689 --- ---  
1438354\_x\_at 0.89487 "Calponin 3, acidic" Cnn3  
1438355\_at 1.09304 transmembrane protein 90a Tmem90a  
1438356\_x\_at 0.99959 RIKEN cDNA 4933432K03 gene 4933432K03Rik  
1438357\_at 1.11468 prefoldin 5 /// prefoldin 5 pseudogene Pfdn5 /// LOC434860  
1438358\_x\_at 0.99348 prefoldin 5 /// prefoldin 5 pseudogene Pfdn5 /// LOC434860  
1438359\_at 1.04490 RIKEN cDNA 2010003K15 gene 2010003K15Rik  
1438360\_x\_at 0.92314 "solute carrier family 25 (mitochondrial carrier, adenine nucleotide translocator), member 5 /// similar to ADP/ATP translocase 2 (Adenine nucleotide translocator 2) (ANT 2) (ADP,ATP carrier protein 2) (Solute carrier family 25 member 5) /// similar to ADP/ATP translocase 2 (Adenine nucleotide translocator 2) (ANT 2) (ADP,ATP carrier protein 2) (Solute carrier family 25 member 5) /// similar to ADP/ATP translocase 2 (Adenine nucleotide translocator 2) (ANT 2) (ADP,ATP carrier protein 2) (Solute carrier family 25 member 5) /// similar to solute carrier family 25, member A6" Slc25a5 /// LOC433326 /// LOC630624 /// LOC669381 /// LOC672115  
1438361\_at 0.98900 RIKEN cDNA 2310035C23 gene 2310035C23Rik  
1438362\_x\_at 0.82406 RIKEN cDNA 2310035C23 gene 2310035C23Rik  
1438363\_at 0.93906 similar to KIAA1183 protein LOC434128  
1438364\_x\_at 0.92667 "angiogenin, ribonuclease A family, member 4" Ang4  
1438365\_x\_at 0.86910 lysosomal-associated protein transmembrane 4B Laptm4b  
1438366\_x\_at 1.11447 chloride channel 3 Clcn3  
1438367\_x\_at 0.94787 "discoidin domain receptor family, member 1" Ddr1  
1438368\_a\_at 0.93515 matrin 3 Matr3  
1438369\_x\_at 1.05638 transmembrane protein 85 Tmem85  
1438370\_x\_at 0.88843 downstream of Stk11 Dos  
1438371\_x\_at 0.95049 DEAD (Asp-Glu-Ala-Asp) box polypeptide 5 Ddx5  
1438372\_at 0.80542 myomesin 2 Myom2  
1438373\_at 1.05760 Amyloid beta (A4) precursor protein App



1438374\_x\_at 1.08807 amyloid beta (A4) precursor protein App  
1438375\_at 0.97490 Fibulin 2 Fbln2  
1438376\_s\_at 0.94374 tripartite motif protein 27 Trim27  
1438377\_x\_at 0.93015 "solute carrier family 13 (sodium-dependent dicarboxylate transporter), member 3" Slc13a3  
1438378\_at 0.84562 RIKEN cDNA 1700013G23 gene 1700013G23Rik  
1438379\_x\_at 0.99357 RIKEN cDNA 2310007F21 gene 2310007F21Rik  
1438380\_at 0.99298 DEAD (Asp-Glu-Ala-Asp) box polypeptide 47 Ddx47  
1438381\_x\_at 0.99580 DEAD (Asp-Glu-Ala-Asp) box polypeptide 47 Ddx47  
1438382\_x\_at 0.93222 RIKEN cDNA 2010005J08 gene 2010005J08Rik  
1438383\_x\_at 0.92244 "protein phosphatase 2 (formerly 2A), regulatory subunit A (PR 65), alpha isoform" Ppp2r1a  
1438384\_at 1.04162 RIKEN cDNA 1700047L15 gene 1700047L15Rik  
1438385\_s\_at 1.01272 glutamic pyruvate transaminase (alanine aminotransferase) 2 Gpt2  
1438386\_x\_at 0.96497 "methionine adenosyltransferase II, alpha" Mat2a  
1438387\_x\_at 0.91421 topoisomerase (DNA) III beta Top3b  
1438388\_at 0.98696 Neurexophilin 1 Nxph1  
1438389\_x\_at 1.11173 ATP citrate lyase Acly  
1438390\_s\_at 0.98101 pituitary tumor-transforming 1 Pttg1  
1438391\_x\_at 1.05153 hydroxyacyl-Coenzyme A dehydrogenase type II Hadh2  
1438392\_at 0.99335 CD247 antigen Cd247  
1438393\_at 0.94707 "In vitro fertilized eggs cDNA, RIKEN full-length enriched library, clone:7420416P19 product:unclassifiable, full insert sequence" ---  
1438394\_x\_at 1.03267 keratin 4 Krt4  
1438395\_at 0.97998 --- ---  
1438396\_at 0.99128 oculocerebrorenal syndrome of Lowe Oclrl  
1438397\_a\_at 1.04569 RNA binding motif protein 39 Rbm39  
1438398\_at 2.17065 "RNA-binding region (RNP1, RRM) containing 2" Rnpc2  
1438399\_at 0.99625 peroxin 2 Pex2  
1438400\_at 1.03859 RIKEN cDNA 4632411B12 gene 4632411B12Rik  
1438401\_at 1.02983 ubinuclein 1 Ubn1  
1438402\_at 0.96523 RIKEN cDNA 9630050M13 gene 9630050M13Rik  
1438403\_s\_at 1.68933 --- ---  
1438404\_at 0.92159 ring finger protein 144 Rnf144  
1438405\_at 1.07116 fibroblast growth factor 7 Fgf7  
1438406\_at 0.93526 "scavenger receptor class F, member 2" Scarf2  
1438407\_at 0.95958 RIKEN cDNA 9330132E09 gene 9330132E09Rik  
1438408\_at 1.07782 ankyrin repeat domain 56 Ankrd56  
1438409\_at 1.08960 centrosomal protein 63 Cep63  
1438410\_at 0.96077 protogenin homolog (Gallus gallus) Prtg  
1438411\_at 1.18262 G protein-coupled receptor 81 Gpr81  
1438412\_at 0.70664 --- ---  
1438413\_at 0.76030 SUMO1/sentrin specific peptidase 7 Senp7

1438414\_at 0.93195 fukutin related protein Fkrp  
1438415\_s\_at 0.82266 "Yip1 domain family, member 2" Yipf2  
1438416\_at 0.95677 thyroid hormone receptor associated protein 5 Thrap5  
1438417\_at 1.02053 PWWP domain containing 2 Pwwp2  
1438418\_at 0.96522 RIKEN cDNA 4932432K03 gene 4932432K03Rik  
1438419\_at 1.07808 RNA binding motif protein 16 Rbm16  
1438420\_at 1.21252 RNA binding motif protein 39 Rbm39  
1438421\_at 0.85755 poliovirus receptor-related 1 Pvr11  
1438422\_at 0.94670 leucine rich repeat containing 20 Lrrc20  
1438423\_at 0.67516 single-stranded DNA binding protein 2 Ssbp2  
1438424\_at 0.83884 "TBC1 domain family, member 24" Tbc1d24  
1438425\_at 1.08629 general transcription factor III C 1 Gtf3c1  
1438426\_at 0.99098 transmembrane protein 58 Tmem58  
1438427\_at 1.02287 RIKEN cDNA 4932442K08 gene 4932442K08Rik  
1438428\_at 1.17951 Junctophilin 1 Jph1  
1438429\_at 1.61260 RIKEN cDNA 2610319H10 gene 2610319H10Rik  
1438430\_at 1.05348 high mobility group box transcription factor 1 Hbp1  
1438431\_at 0.92633 "ATP-binding cassette, sub-family D (ALD), member 2" Abcd2  
1438432\_at 1.03021 leucyl/cystinyl aminopeptidase Lnpep  
1438433\_at 1.29329 WAS protein homology region 2 domain containing 1 Whdc1  
1438434\_at 1.10871 Rho GTPase activating protein 11A Arhgap11a  
1438435\_at 0.89087 "phytoceramidase, alkaline" Phca  
1438436\_at 0.99365 RIKEN cDNA 6330407J23 gene 6330407J23Rik  
1438437\_a\_at 0.98956 RIKEN cDNA 4933439C10 gene 4933439C10Rik  
1438438\_at 0.89669 RIKEN cDNA 2900002H16 gene 2900002H16Rik  
1438439\_at 0.95846 G protein-coupled receptor 171 Gpr171  
1438440\_at 0.96393 "ribonuclease III, nuclear" Rnasen  
1438441\_at 0.81619 Inhibitor of DNA binding 4 Id4  
1438442\_at 0.92750 expressed sequence AI450236 AI450236  
1438443\_at 1.03244 zinc finger and BTB domain containing 20 Zbtb20  
1438444\_at 0.90990 RIKEN cDNA A230091H23 gene A230091H23Rik  
1438445\_at 0.83087 "leucine rich repeat containing 8 family, member E" Lrrc8e  
1438446\_x\_at 1.01803 putative phosphatase RP23-136K12.4  
1438447\_at 1.05743 "DEAD/H (Asp-Glu-Ala-Asp/His) box polypeptide 11 (CHL1-like helicase homolog, *S. cerevisiae*)" Ddx11  
1438448\_at 1.01662 otopetrin 1 Otop1  
1438449\_at 1.08779 Cdc42 binding protein kinase alpha Cdc42bpa  
1438450\_at 0.86857 lin-7 homolog A (*C. elegans*) Lin7a  
1438451\_at 0.81105 Rho GTPase-activating protein Grit  
1438452\_at 0.79003 nebulin Nebl  
1438453\_at 0.85847 Rad51 homolog c (*S. cerevisiae*) Rad51c  
1438454\_at 1.67994 RIKEN cDNA B430203M17 gene B430203M17Rik  
1438455\_at 0.99749 RIKEN cDNA C330050A14 gene C330050A14Rik

1438456\_at 0.95097 histocompatibility 13 H13  
1438457\_at 0.95166 "Transcribed locus, strongly similar to XP\_574375.1 PREDICTED: similar to MGC15476 protein [Rattus norvegicus]" ---  
1438458\_a\_at 1.18160 splicing factor proline/glutamine rich (polypyrimidine tract binding protein associated) Sfpq  
1438459\_x\_at 1.18957 splicing factor proline/glutamine rich (polypyrimidine tract binding protein associated) Sfpq  
1438460\_at 1.26484 "zinc finger, MYM-type 4" Zmym4  
1438461\_at 1.00922 --- ---  
1438462\_x\_at 0.98185 --- ---  
1438463\_x\_at 0.90970 "zinc finger, DHHC domain containing 6" Zdhhc6  
1438464\_at 1.07393 AT rich interactive domain 4A (Rbp1 like) Arid4a  
1438465\_at 1.08667 RIKEN cDNA 5830428H23 gene 5830428H23Rik  
1438466\_at 0.78827 "dynein, axonemal, heavy chain 12 /// dynein, axonemal, heavy chain 7b /// dynein heavy chain-related" Dnahc12 /// Dnahc7b /// LOC433299  
1438467\_at 0.94165 macrophage galactose N-acetyl-galactosamine specific lectin 2 Mgl2  
1438468\_at 1.02273 preferentially expressed antigen in melanoma like 4 /// preferentially expressed antigen in melanoma like 5 Pramel4 /// Pramel5  
1438469\_at 0.87799 BCL6 co-repressor-like 1 Bcorl1  
1438470\_at 0.61346 suppressor of cytokine signaling 2 Socs2  
1438471\_at 1.12320 Wilms' tumour 1-associating protein Wtap  
1438472\_at 0.86274 --- ---  
1438473\_at 1.03186 ADP-ribosylation factor-like 15 Arl15  
1438474\_at 1.06019 ankyrin repeat domain 35 Ankrd35  
1438475\_at 1.02287 cDNA sequence AB124611 AB124611  
1438476\_a\_at 0.94781 chromodomain helicase DNA binding protein 4 Chd4  
1438477\_a\_at 0.81933 methylmalonyl CoA epimerase Mcee  
1438478\_a\_at 0.92583 "protein phosphatase 3, catalytic subunit, alpha isoform" Ppp3ca  
1438479\_at 0.98644 zinc finger protein 213 Zfp213  
1438480\_a\_at 1.01700 thymocyte nuclear protein 1 Thyn1  
1438481\_at 1.05231 PRP4 pre-mRNA processing factor 4 homolog (yeast) Prpf4  
1438482\_at 1.20281 WW domain containing E3 ubiquitin protein ligase 2 Wwp2  
1438483\_at 1.06937 "nitric oxide synthase 1, neuronal" Nos1  
1438484\_at 0.90610 "gene model 237, (NCBI)" Gm237  
1438485\_at 0.92739 RIKEN cDNA E130112L23 gene E130112L23Rik  
1438486\_at 1.13379 testis-specific serine kinase 4 Tssk4  
1438487\_s\_at 0.87354 "zinc finger, ZZ domain containing 3" Zzz3  
1438488\_at 1.00281 esterase D/formylglutathione hydrolase Esd  
1438489\_at 1.17419 --- ---  
1438490\_at 1.01210 "solute carrier family 39 (zinc transporter), member 14" Slc39a14  
1438491\_x\_at 0.91444 RIKEN cDNA A530054K11 gene A530054K11Rik  
1438492\_at 0.88171 Suppressor of cytokine signaling 7 Socs7  
1438493\_at 0.95839 RIKEN cDNA 4933433K01 gene 4933433K01Rik

1438494\_at 1.01222 histamine receptor H 1 Hrh1  
1438495\_at 1.57825 topoisomerase (DNA) I Top1  
1438496\_a\_at 0.88914 RIKEN cDNA 6330505F04 gene 6330505F04Rik  
1438497\_at 1.05773 RIKEN cDNA 2810423E13 gene 2810423E13Rik  
1438498\_at 1.15473 "zinc finger, MYND-type containing 15" Zmynd15  
1438499\_at 1.02907 RIKEN cDNA 1700029I15 gene 1700029I15Rik  
1438500\_at 0.98534 proline-rich transmembrane protein 3 Prrt3  
1438501\_at 0.99887 Ribosomal protein S17 Rps17  
1438502\_x\_at 1.03112 ribosomal protein S17 /// similar to 40S ribosomal protein S17 Rps17 ///  
LOC383032  
1438503\_x\_at 1.04897 endothelial differentiation-related factor 1 /// similar to Endothelial  
differentiation-related factor 1 (EDF-1) (Multiprotein bridging factor 1) (MBF1) (Calmodulin-associated  
peptide 19) (CAP-19) /// similar to Endothelial differentiation-related factor 1 (EDF-1) (Multiprotein  
bridging factor 1) (MBF1) (Calmodulin-associated peptide 19) (CAP-19) /// similar to Endothelial  
differentiation-related factor 1 (EDF-1) (Multiprotein bridging factor 1) (MBF1) (Calmodulin-associated  
peptide 19) (CAP-19) Edf1 /// LOC665181 /// LOC671865 /// LOC674653  
1438504\_x\_at 0.96813 Transmembrane 7 superfamily member 3 Tm7sf3  
1438505\_s\_at 1.00801 "ribonuclease III, nuclear" Rnasen  
1438506\_s\_at 1.10475 "Prenyl (solanesyl) diphosphate synthase, subunit 1" Pdss1  
1438507\_x\_at 1.11281 ribosomal protein L14 Rpl14  
1438508\_at 1.01464 Jumonji domain containing 1B Jmjd1b  
1438509\_at 0.93260 "Proteasome (prosome, macropain) 28 subunit, 3" Psme3  
1438510\_a\_at 0.97225 histidyl-tRNA synthetase Hars  
1438511\_a\_at 1.03475 RIKEN cDNA 1190002H23 gene 1190002H23Rik  
1438512\_at 1.02426 cDNA sequence BC048679 BC048679  
1438513\_at 1.77402 TatD DNase domain containing 1 Tatdn1  
1438514\_at 1.09911 NPC1-like 1 Npc11  
1438515\_at 1.58248 zinc finger protein 207 Zfp207  
1438516\_at 1.89683 Rap1 interacting factor 1 homolog (yeast) Rif1  
1438517\_at 0.94560 WW domain-containing oxidoreductase Wwox  
1438518\_at 0.89538 RIKEN cDNA 9930021J03 gene 9930021J03Rik  
1438519\_at 2.07292 kelch-like 24 (Drosophila) Khl24  
1438520\_at 0.96571 "solute carrier family 25, member 36" Slc25a36  
1438521\_at 0.90197 Osteopetrosis associated transmembrane protein 1 Ostm1  
1438522\_at 1.12865 RIKEN cDNA 1700054H16 gene 1700054H16Rik  
1438523\_x\_at 1.00982 RIKEN cDNA 1500001A10 gene 1500001A10Rik  
1438524\_x\_at 0.89551 proline-rich nuclear receptor coactivator 1 Pnrc1  
1438525\_at 1.08029 Myeloid/lymphoid or mixed lineage-leukemia translocation to 10 homolog  
(Drosophila) Mllt10  
1438526\_at 0.95923 G protein-coupled receptor 158 Gpr158  
1438527\_at 1.50561 ribosomal protein L3 /// similar to 60S ribosomal protein L3 (J1 protein) ///  
similar to 60S ribosomal protein L3 (L4) /// similar to 60S ribosomal protein L3 (J1 protein) /// similar to  
60S ribosomal protein L3 (L4) /// similar to ribosomal protein L3 isoform b /// similar to 60S ribosomal

protein L3 (J1 protein) /// similar to 60S ribosomal protein L3 (J1 protein) /// similar to 60S ribosomal  
 protein L3 (J1 protein) /// similar to 60S ribosomal protein L3 (J1 protein) /// similar to ribosomal  
 protein L3 isoform b Rpl3 /// LOC242809 /// LOC433745 /// LOC545864 /// LOC635340 ///  
 LOC668219 /// LOC669672 /// LOC670435 /// LOC670753 /// LOC674810 /// LOC674874  
 1438528\_at 2.30925 Pericentriolar material 1 Pcm1  
 1438529\_at 0.98861 "DNA segment, Chr 4, ERATO Doi 429, expressed" D4Ertd429e  
 1438530\_at 1.05977 tissue factor pathway inhibitor Tfpi  
 1438531\_at 0.79977 RIKEN cDNA A730054J21 gene A730054J21Rik  
 1438532\_at 1.03457 hemicentin 1 Hmcn1  
 1438533\_at 1.30258 myosin IXb Myo9b  
 1438534\_x\_at 0.99319 cDNA sequence BC004004 BC004004  
 1438535\_at 1.73479 pleckstrin homology domain interacting protein Phip  
 1438536\_at 1.01504 RIKEN cDNA 5830411N06 gene 5830411N06Rik  
 1438537\_at 1.15932 --- ---  
 1438538\_at 1.13416 RIKEN cDNA D630021H01 gene D630021H01Rik  
 1438539\_at 1.06906 Activating signal cointegrator 1 complex subunit 1 Ascc1  
 1438540\_at 1.02323 --- ---  
 1438541\_at 1.06161 RIKEN cDNA 4933439F18 gene 4933439F18Rik  
 1438542\_at 1.68033 --- ---  
 1438543\_at 1.10611 Spermatogenesis associated 13 Spata13  
 1438544\_at 0.83169 RIKEN cDNA 1700001G11 gene 1700001G11Rik  
 1438545\_at 1.13775 "solute carrier family 25 (mitochondrial carrier, adenine nucleotide  
 translocator), member 5 /// similar to ADP/ATP translocase 2 (Adenine nucleotide translocator 2) (ANT  
 2) (ADP,ATP carrier protein 2) (Solute carrier family 25 member 5) /// similar to ADP/ATP translocase  
 2 (Adenine nucleotide translocator 2) (ANT 2) (ADP,ATP carrier protein 2) (Solute carrier family 25  
 member 5) /// similar to solute carrier family 25, member 5 /// similar to ADP/ATP translocase 2  
 (Adenine nucleotide translocator 2) (ANT 2) (ADP,ATP carrier protein 2) (Solute carrier family 25  
 member 5) /// similar to solute carrier family 25, member 5 /// similar to ADP/ATP translocase 2  
 (Adenine nucleotide translocator 2) (ANT 2) (ADP,ATP carrier protein 2) (Solute carrier family 25  
 member 5) /// similar to solute carrier family 25, member 5" Slc25a5 /// LOC433326 /// LOC433923 ///  
 LOC623402 /// LOC630624 /// LOC633283 /// LOC669381 /// LOC670371  
 1438546\_x\_at 1.08527 "solute carrier family 25 (mitochondrial carrier, adenine nucleotide  
 translocator), member 5 /// similar to ADP/ATP translocase 2 (Adenine nucleotide translocator 2) (ANT  
 2) (ADP,ATP carrier protein 2) (Solute carrier family 25 member 5) /// similar to ADP/ATP translocase  
 2 (Adenine nucleotide translocator 2) (ANT 2) (ADP,ATP carrier protein 2) (Solute carrier family 25  
 member 5) /// similar to solute carrier family 25, member 5 /// similar to ADP/ATP translocase 2  
 (Adenine nucleotide translocator 2) (ANT 2) (ADP,ATP carrier protein 2) (Solute carrier family 25  
 member 5) /// similar to solute carrier family 25, member 5 /// similar to ADP/ATP translocase 2  
 (Adenine nucleotide translocator 2) (ANT 2) (ADP,ATP carrier protein 2) (Solute carrier family 25  
 member 5) /// similar to solute carrier family 25, member 5" Slc25a5 /// LOC433326 /// LOC433923 ///  
 LOC623402 /// LOC630624 /// LOC633283 /// LOC669381 /// LOC670371  
 1438547\_x\_at 1.00316 "torsin family 2, member A" Tor2a  
 1438548\_x\_at 0.91200 rhomboid domain containing 3 Rhbdd3

1438549\_a\_at 0.76045 serine racemase Srr  
1438550\_x\_at 0.97794 serine racemase Srr  
1438551\_at 1.07494 neurogenin 1 Neurog1  
1438552\_x\_at 0.86509 zyxin Zyx  
1438553\_x\_at 0.91674 RIKEN cDNA 4930453N24 gene 4930453N24Rik  
1438554\_x\_at 0.94658 Williams-Beuren syndrome chromosome region 1 homolog (human) Wbscr1  
1438555\_x\_at 0.82547 RIKEN cDNA 4933405I11 gene /// mucin 4 4933405I11Rik /// Muc4  
1438556\_a\_at 0.84618 tropomodulin 3 Tmod3  
1438557\_x\_at 0.84927 aspartyl aminopeptidase Dnpep  
1438558\_x\_at 0.74588 Forkhead box Q1 Foxq1  
1438559\_x\_at 0.87136 "solute carrier family 44, member 2" Slc44a2  
1438560\_x\_at 1.01878 chaperonin subunit 4 (delta) Cct4  
1438561\_x\_at 0.97317 RIKEN cDNA 4930538D17 gene 4930538D17Rik  
1438562\_a\_at 1.15992 "protein tyrosine phosphatase, non-receptor type 2" Ptpn2  
1438563\_s\_at 0.96052 mitochondrial ribosomal protein S24 Mrps24  
1438564\_at 1.16666 Growth arrest specific 2 Gas2  
1438565\_at 1.07625 RIKEN cDNA A830010M20 gene A830010M20Rik  
1438566\_at 1.04104 "ST8 alpha-N-acetyl-neuraminide alpha-2,8-sialyltransferase 6" St8sia6  
1438567\_at 1.04027 von Willebrand factor A domain containing 2 Vwa2  
1438568\_at 0.81800 "MAS-related GPR, member E" Mrgpre  
1438569\_at 0.98217 coiled-coil domain containing 38 Ccdc38  
1438570\_at 0.96070 Transcribed locus ---  
1438571\_at 1.06608 Budding uninhibited by benzimidazoles 1 homolog (S. cerevisiae) Bub1  
1438572\_at 0.92924 CUB and Sushi multiple domains 3 Csm3  
1438573\_at 0.94841 "RMI1, RecQ mediated genome instability 1, homolog (S. cerevisiae)" Rmi1  
1438574\_at 0.87344 G protein-coupled receptor 152 Gpr152  
1438575\_a\_at 0.96348 RIKEN cDNA 2900056M20 gene 2900056M20Rik  
1438576\_x\_at 0.88169 RIKEN cDNA 2900056M20 gene 2900056M20Rik  
1438577\_at 0.94772 Transcribed locus ---  
1438578\_a\_at 0.98545 BTB (POZ) domain containing 10 Btbd10  
1438579\_at 1.13980 "UTP14, U3 small nucleolar ribonucleoprotein, homolog B (yeast)" Utp14b  
1438580\_at 1.38915 "zinc finger, CCHC domain containing 7" Zcchc7  
1438581\_at 1.50588 RIKEN cDNA 4932439K10 gene 4932439K10Rik  
1438582\_at 0.92013 ARP5 actin-related protein 5 homolog (yeast) Actr5  
1438583\_at 0.96315 Endoplasmic reticulum (ER) to nucleus signalling 1 Ern1  
1438584\_at 0.94169 RIKEN cDNA 4932411G14 gene 4932411G14Rik  
1438585\_at 1.00603 synaptic nuclear envelope 2 Syne2  
1438586\_at 0.90048 T-box 22 Tbx22  
1438587\_at 0.96985 RIKEN cDNA 4933417M04 gene 4933417M04Rik  
1438588\_at 1.05052 Pleiomorphic adenoma gene-like 1 Plagl1  
1438589\_at 1.06080 "immunoglobulin superfamily, member 1" Igsf1  
1438590\_at 1.45002 Rap guanine nucleotide exchange factor (GEF) 3 Rapgef3  
1438591\_at 1.25036 RIKEN cDNA 2610019A05 gene 2610019A05Rik

1438592\_at 1.05780 NIMA (never in mitosis gene a)-related expressed kinase 1 Nek1  
1438593\_at 1.01558 hypothetical LOC622461 LOC622461  
1438594\_at 0.95344 "PREDICTED: Mus musculus similar to poly(A) binding protein, cytoplasmic 1 (LOC245545), mRNA" ---  
1438595\_at 1.03112 "gene model 546, (NCBI)" Gm546  
1438596\_at 1.07030 HECT domain containing 2 Hectd2  
1438597\_x\_at 0.94054 mortality factor 4 like 1 /// similar to mortality factor 4 like 1 isoform b /// similar to mortality factor 4 like 1 /// similar to mortality factor 4 like 1 (predicted) Morf411 /// LOC433955 /// LOC627352 /// LOC635663  
1438598\_at 0.88072 src homology 2 domain-containing transforming protein C2 Shc2  
1438599\_at 0.96218 --- ---  
1438600\_at 0.96422 similar to Cyclin-dependent kinases regulatory subunit 1 (CKS-1) (Sid 1334) LOC624855  
1438601\_at 1.15990 "protein kinase, membrane associated tyrosine/threonine 1" Pkmyt1  
1438602\_s\_at 0.66039 mannan-binding lectin serine peptidase 1 Masp1  
1438603\_x\_at 0.63224 Mannan-binding lectin serine peptidase 1 Masp1  
1438604\_at 1.01081 "ATPase, Class I, type 8B, member 3" Atp8b3  
1438605\_at 0.88664 Cell division cycle 26 Cdc26  
1438606\_a\_at 0.95120 chloride intracellular channel 4 (mitochondrial) Clic4  
1438607\_at 0.98497 "zinc finger, DHHC domain containing 19" Zdhhc19  
1438608\_at 1.00638 "Troponin I, skeletal, fast 2" Tnni2  
1438609\_x\_at 0.92904 "troponin I, skeletal, fast 2" Tnni2  
1438610\_a\_at 0.86222 "Crystallin, zeta" Cryz  
1438611\_at 0.95981 "Tubulin, alpha 3" Tuba3  
1438612\_a\_at 1.02896 "colipase, pancreatic" Clps  
1438613\_at 1.03928 "potassium voltage-gated channel, shaker-related subfamily, member 4" Kcna4  
1438614\_x\_at 1.12814 Oxysterol binding protein-like 9 Osbp19  
1438615\_x\_at 0.97978 RIKEN cDNA 2010317E24 gene 2010317E24Rik  
1438616\_x\_at 0.96404 seminal vesicle secretion 5 Svs5  
1438617\_at 0.91478 "Serine (or cysteine) peptidase inhibitor, clade A (alpha-1 antiproteinase, antitrypsin), member 7" Serpina7  
1438618\_at 1.07794 expressed sequence AI507597 AI507597  
1438619\_x\_at 0.94470 "zinc finger, DHHC domain containing 14" Zdhhc14  
1438620\_x\_at 1.02498 secreted frizzled-related sequence protein 1 Sfrp1  
1438621\_x\_at 1.06969 AXL receptor tyrosine kinase Axl  
1438622\_x\_at 1.05496 "tubulin, beta 2c" Tubb2c  
1438623\_x\_at 0.96287 ring-box 1 Rbx1  
1438624\_x\_at 1.05723 heparan sulfate (glucosamine) 3-O-sulfotransferase 2 Hs3st2  
1438625\_s\_at 0.93699 necdin /// PCTAIRE-motif protein kinase 1 Ndn /// Pctk1  
1438626\_x\_at 1.11665 ribosomal protein L14 Rpl14  
1438627\_x\_at 1.22024 phosphogluconate dehydrogenase Pgd  
1438628\_x\_at 1.05469 contactin 3 Cntn3  
1438629\_x\_at 0.93983 granulin Grn

1438630\_x\_at 0.98431 "methionine adenosyltransferase II, alpha" Mat2a  
1438631\_x\_at 0.89332 tetratricopeptide repeat domain 13 Ttc13  
1438632\_x\_at 0.93188 transition protein 1 Tnp1  
1438633\_x\_at 1.00734 LIM and SH3 protein 1 Lasp1  
1438634\_x\_at 1.09674 LIM and SH3 protein 1 Lasp1  
1438635\_x\_at 1.04266 RIKEN cDNA B930041F14 gene B930041F14Rik  
1438636\_s\_at 1.01007 sushi domain containing 5 Susd5  
1438637\_x\_at 1.02665 "splicing factor 3b, subunit 2" Sf3b2  
1438638\_x\_at 0.91722 RIKEN cDNA 1700027J05 gene 1700027J05Rik  
1438639\_x\_at 1.09109 RIKEN cDNA 4933417E01 gene 4933417E01Rik  
1438640\_x\_at 1.19893 phosphoglycerate kinase 1 /// phosphoglycerate kinase 1-like ///  
phosphoglycerate kinase 1 pseudogene /// phosphoglycerate kinase 1-like Pgk1 /// LOC433594 ///  
LOC665053 /// LOC668435  
1438641\_x\_at 0.96148 RIKEN cDNA 1500016O10 gene 1500016O10Rik  
1438642\_at 1.03368 --- ---  
1438643\_at 1.19658 Calcium/calmodulin-dependent protein kinase ID Camk1d  
1438644\_x\_at 0.90900 COMM domain containing 9 Commd9  
1438645\_x\_at 1.06803 beta-site APP-cleaving enzyme 2 Bace2  
1438646\_x\_at 0.93635 RIKEN cDNA 2510039O18 gene 2510039O18Rik  
1438647\_x\_at 0.91420 centrin 2 Cctn2  
1438648\_x\_at 0.97375 RIKEN cDNA 1190003M12 gene 1190003M12Rik  
1438649\_x\_at 0.91752 phosphatidylethanolamine binding protein 1 Pebp1  
1438650\_x\_at 0.96897 gap junction membrane channel protein alpha 1 Gja1  
1438651\_a\_at 0.93821 angiotensin receptor-like 1 Agtrl1  
1438652\_x\_at 0.91567 "phosphatidylinositol glycan anchor biosynthesis, class Q" Pigq  
1438653\_x\_at 0.92561 ataxin 10 Atn10  
1438654\_x\_at 1.00744 monocyte to macrophage differentiation-associated 2 Mmd2  
1438655\_a\_at 1.09604 RIKEN cDNA 1100001I22 gene 1100001I22Rik  
1438656\_x\_at 1.01093 translocase of inner mitochondrial membrane 17b Timm17b  
1438657\_x\_at 0.96102 protein tyrosine phosphatase 4a1 /// protein tyrosine phosphatase 4a1-like ///  
protein tyrosine phosphatase 4a1 pseudogene /// protein tyrosine phosphatase 4a1-like /// similar to  
protein tyrosine phosphatase 4a1 Ptp4a1 /// LOC433406 /// LOC627166 /// LOC627200 ///  
LOC667723  
1438658\_a\_at 0.93812 "endothelial differentiation, sphingolipid G-protein-coupled receptor, 3"  
Edg3  
1438659\_x\_at 0.99180 coiled-coil-helix-coiled-coil-helix domain containing 6 Chchd6  
1438660\_at 1.39471 "glucosaminyl (N-acetyl) transferase 2, I-branching enzyme" Gcnt2  
1438661\_a\_at 0.74766 ADP-ribosylation factor 2 Arf2  
1438662\_at 0.94361 similar to transmembrane protein SHREW1 LOC433810  
1438663\_at 1.12561 BAT2 domain containing 1 Bat2d  
1438664\_at 1.01322 "protein kinase, cAMP dependent regulatory, type II beta" Prkar2b  
1438665\_at 1.09491 "sphingomyelin phosphodiesterase 3, neutral" Smpd3  
1438666\_at 0.76655 low density lipoprotein receptor class A domain containing 3 Ldlrad3



1438667\_at 0.98224 RIKEN cDNA 5730410E15 gene 5730410E15Rik  
1438668\_x\_at 1.06688 ataxin 2-like Atxn2l  
1438669\_at 0.91314 WD repeat domain 40A Wdr40a  
1438670\_at 0.97055 "protein tyrosine phosphatase, non-receptor type 1" Ptpn1  
1438671\_at 1.01606 "protein phosphatase 2 (formerly 2A), regulatory subunit B (PR 52), gamma isoform" Ppp2r2c  
1438672\_at 0.96183 "parvin, beta" Parvb  
1438673\_at 1.10510 --- ---  
1438674\_a\_at 1.20603 "splicing factor, arginine/serine-rich 8" Sfrs8  
1438675\_at 1.75105 "splicing factor, arginine/serine-rich 8" Sfrs8  
1438676\_at 1.68641 macrophage activation 2 like /// similar to macrophage activation 2 like /// similar to macrophage activation 2 like Mpa2l /// LOC626578 /// LOC673101  
1438677\_at 0.89823 plakophilin 4 Pkp4  
1438678\_at 0.89291 RIKEN cDNA 1500011K16 gene 1500011K16Rik  
1438679\_at 0.98612 Tripartite motif protein 8 Trim8  
1438680\_at 0.94408 autism susceptibility candidate 2 Aut2  
1438681\_at 0.90650 "alkB, alkylation repair homolog 1 (E. coli)" Alkbl1  
1438682\_at 0.93692 "phosphatidylinositol 3-kinase, regulatory subunit, polypeptide 1 (p85 alpha)" Pik3r1  
1438683\_at 0.98546 "WAS protein family, member 2" Wasf2  
1438684\_at 0.82714 "NUAK family, SNF1-like kinase, 1" Nuak1  
1438685\_at 0.91001 "zinc finger, MYM-type 6" Zmym6  
1438686\_at 1.00580 "eukaryotic translation initiation factor 4, gamma 1" Eif4g1  
1438687\_at 1.03002 lymphocyte transmembrane adaptor 1 Lax1  
1438688\_at 1.13240 serine/arginine repetitive matrix 2 Srrm2  
1438689\_at 0.92777 RIKEN cDNA C730049F21 gene C730049F21Rik  
1438690\_at 1.83250 Thymidylate synthase Tysm  
1438691\_at 0.86827 "zinc finger, ZZ-type with EF hand domain 1" Zzef1  
1438692\_at 1.05421 "general transcription factor IIIC, polypeptide 4" Gtf3c4  
1438693\_at 0.76109 transmembrane protein 110 Tmem110  
1438694\_at 1.08323 casein alpha s2-like A Csn1s2a  
1438695\_at 0.85321 RIKEN cDNA C230091D08 gene C230091D08Rik  
1438696\_at 0.98151 endothelin 3 Edn3  
1438697\_at 1.00694 RIKEN cDNA 4632425D07 gene 4632425D07Rik  
1438698\_at 0.98880 RIKEN cDNA 4632425D07 gene 4632425D07Rik  
1438699\_at 0.96448 steroid 5 alpha-reductase 1 Srd5a1  
1438700\_at 1.88254 formin binding protein 4 Fnbp4  
1438701\_at 1.17503 bicaudal D homolog 1 (Drosophila) Bicd1  
1438702\_at 1.04553 --- ---  
1438703\_at 0.91954 ankyrin repeat domain 26 Ankrd26  
1438704\_at 0.91812 tripartite motif-containing 63 Trim63  
1438705\_at 0.69472 expressed sequence AI465270 AI465270  
1438706\_at 0.92060 RIKEN cDNA 6430517E21 gene 6430517E21Rik

1438707\_at 0.91670 ATPase type 13A4 Atp13a4  
1438708\_x\_at 0.90300 "tyrosine 3-monooxygenase/tryptophan 5-monooxygenase activation protein, beta polypeptide" Ywhab  
1438709\_at 0.98249 "WD repeat domain, phosphoinositide interacting 1" Wipi1  
1438710\_at 0.96259 5-hydroxytryptamine (serotonin) receptor 1A Htr1a  
1438711\_at 0.92712 pyruvate kinase liver and red blood cell Pklr  
1438712\_at 1.08068 DENN/MADD domain containing 2D Dennd2d  
1438713\_at 0.79749 Ras association (RalGDS/AF-6) domain family 8 Rassf8  
1438714\_at 1.39219 zinc finger protein 207 Zfp207  
1438715\_at 0.86138 coiled-coil domain containing 102A Ccdc102a  
1438716\_at 1.01554 expressed sequence AI451617 AI451617  
1438717\_a\_at 1.00829 oxysterol binding protein-like 6 Osbp16  
1438718\_at 1.08782 fibroblast growth factor 9 Fgf9  
1438719\_at 1.00116 expressed sequence AI585793 AI585793  
1438720\_at 0.92776 RIKEN cDNA 9330159F19 gene 9330159F19Rik  
1438721\_a\_at 1.23472 interferon regulatory factor 3 Irf3  
1438722\_at 0.84930 RIKEN cDNA 2610014I16 gene 2610014I16Rik  
1438723\_a\_at 0.99890 ribosomal protein S10 /// similar to ribosomal protein S10 /// similar to ribosomal protein S10 Rps10 /// LOC636539 /// LOC666274  
1438724\_at 1.08099 oxysterol binding protein-like 3 Osbp13  
1438725\_at 1.09381 thyroid hormone receptor associated protein 1 Thrapl1  
1438726\_at 0.86578 "microtubule associated monooxygenase, calponin and LIM domain containing 2" Mical2  
1438727\_at 0.89922 WD repeat domain 32 Wdr32  
1438728\_at 0.90794 Ngg1 interacting factor 3-like 1 (S. pombe) Nif311  
1438729\_at 1.01546 Expressed sequence BB176347 BB176347  
1438730\_at 1.00435 cDNA sequence BC028801 BC028801  
1438731\_at 0.99093 --- ---  
1438732\_at 0.99958 hypothetical protein 6430511F03 6430511F03  
1438733\_at 0.96120 zinc finger protein 689 Zfp689  
1438734\_at 1.03740 RIKEN cDNA A530016L24 gene A530016L24Rik  
1438735\_at 0.96061 remodeling and spacing factor 1 Rsf1  
1438736\_at 1.10471 THO complex 2 Thoc2  
1438737\_at 1.00670 zinc finger protein of the cerebellum 3 Zic3  
1438738\_at 1.16816 CDNA sequence BC010584 BC010584  
1438739\_at 2.15942 cellular nucleic acid binding protein Cnbp  
1438740\_at 0.97578 N-myristoyltransferase 2 Nmt2  
1438741\_at 0.88409 cDNA sequence BC019943 BC019943  
1438742\_at 0.82641 zinc finger protein 629 Zfp629  
1438743\_at 1.07578 "cytochrome P450, family 7, subfamily a, polypeptide 1" Cyp7a1  
1438744\_at 0.91331 ankyrin repeat and SOCS box-containing protein 7 Asb7  
1438745\_at 0.97610 hypothetical protein LOC666945 LOC666945  
1438746\_at 0.99154 RIKEN cDNA A530058N18 gene A530058N18Rik

1438747\_at 0.94845 RIKEN cDNA A930006K02 gene A930006K02Rik  
 1438748\_at 1.22380 RIKEN cDNA 9830127L17 gene 9830127L17Rik  
 1438749\_at 1.07574 fuzzy homolog (Drosophila) Fuz  
 1438750\_at 0.98913 Alpha thalassemia/mental retardation syndrome X-linked homolog (human)  
 Atrx  
 1438751\_at 1.04175 "solute carrier family 30, member 10" Slc30a10  
 1438752\_at 1.09927 RIKEN cDNA A230058F20 gene A230058F20Rik  
 1438753\_at 0.96381 Porcupine homolog (Drosophila) Porcn  
 1438754\_at 0.98774 --- ---  
 1438755\_at 1.06074 expressed sequence C80068 C80068  
 1438756\_at 0.92588 ankyrin repeat domain 29 Ankrd29  
 1438757\_at 1.11238 RIKEN cDNA C130069I09 gene C130069I09Rik  
 1438758\_at 0.90988 --- ---  
 1438759\_x\_at 0.94972 --- ---  
 1438760\_x\_at 0.94209 a disintegrin and metallopeptidase domain 15 (metargidin) Adam15  
 1438761\_a\_at 1.12430 "ornithine decarboxylase, structural 1 /// similar to Ornithine decarboxylase  
 (ODC) /// similar to Ornithine decarboxylase (ODC) /// similar to Ornithine decarboxylase (ODC) ///  
 hypothetical protein LOC671973 /// similar to Ornithine decarboxylase (ODC)" Odc1 ///  
 LOC666231 /// LOC668343 /// LOC670279 /// LOC671973 /// LOC673302  
 1438762\_at 1.43252 Transcription factor 12 Tcf12  
 1438763\_at 0.83428 "dynein, axonemal, heavy chain 2 /// dynein heavy chain domain 3"  
 Dnahc2 /// Dnhd3  
 1438764\_at 1.00264 annexin A7 Anxa7  
 1438765\_at 1.07453 DEAH (Asp-Glu-Ala-His) box polypeptide 33 Dhx33  
 1438766\_at 1.32621 proline-rich nuclear receptor coactivator 2 Pnrc2  
 1438767\_at 0.99501 oncostatin M Osm  
 1438768\_at 1.00321 hypothetical protein LOC665225 /// hypothetical protein LOC669601 ///  
 hypothetical protein LOC676250 LOC665225 /// LOC669601 /// LOC676250  
 1438769\_a\_at 1.04799 thymocyte nuclear protein 1 Thyn1  
 1438770\_at 1.08568 "gene model 266, (NCBI)" Gm266  
 1438771\_at 1.09224 bromodomain containing 1 Brd1  
 1438772\_at 0.97077 zinc finger protein 367 Zfp367  
 1438773\_at 1.08246 six transmembrane epithelial antigen of prostate 2 Steap2  
 1438774\_s\_at 0.88523 phosphoglucomutase 2-like 1 Pgm2l1  
 1438775\_at 1.09821 "Peroxisome proliferative activated receptor, gamma, coactivator 1 beta"  
 Ppargc1b  
 1438776\_x\_at 1.02881 ribosomal protein S17 /// similar to ribosomal protein S17 /// similar to 40S  
 ribosomal protein S17 Rps17 /// LOC268650 /// LOC383032  
 1438777\_a\_at 1.12216 EST AA881470 AA881470  
 1438778\_at 1.03372 "Adult male diencephalon cDNA, RIKEN full-length enriched library,  
 clone:9330183L06 product:unclassifiable, full insert sequence" ---  
 1438779\_at 0.47395 "procollagen, type IV, alpha 3" Col4a3  
 1438780\_at 1.08829 --- ---

1438781\_at 2.32391 RIKEN cDNA E130014J05 gene E130014J05Rik  
 1438782\_at 0.99096 contactin 4 Cntn4  
 1438783\_at 0.98816 similar to Nedd4 WW binding protein 4 LOC637870  
 1438784\_at 1.10172 --- ---  
 1438785\_at 1.02685 ectonucleotide pyrophosphatase/phosphodiesterase 6 Enpp6  
 1438786\_a\_at 1.09222 RIKEN cDNA 2610021A01 gene /// similar to zinc finger protein 347  
 2610021A01Rik /// LOC668572  
 1438787\_at 0.91493 zinc finger protein 206 Zfp206  
 1438788\_at 2.49853 "DNA segment, Chr 5, Wayne State University 152, expressed" D5Wsu152e  
 1438789\_s\_at 0.86009 dihydropyrimidinase-like 3 Dpysl3  
 1438790\_x\_at 0.94909 transmembrane protein 41B Tmem41b  
 1438791\_at 0.97781 RIKEN cDNA 1700016P04 gene 1700016P04Rik  
 1438792\_at 0.89821 RIKEN cDNA 1200007D18 gene 1200007D18Rik  
 1438793\_x\_at 1.00641 RIKEN cDNA 1200007D18 gene 1200007D18Rik  
 1438794\_x\_at 1.03351 ribosomal protein S13 /// similar to ribosomal protein S13 /// similar to  
 ribosomal protein S13 /// similar to ribosomal protein S13 /// similar to ribosomal protein S13 /// similar  
 to ribosomal protein S13 /// similar to ribosomal protein S13 /// similar to ribosomal protein S13  
 Rps13 /// LOC625298 /// LOC628061 /// LOC633920 /// LOC637251 /// LOC668239 /// LOC671723 ///  
 LOC671887  
 1438795\_x\_at 1.04513 FK506 binding protein 1a Fkbp1a  
 1438796\_at 1.13239 --- ---  
 1438797\_at 0.88101 RIKEN cDNA 6330509M05 gene 6330509M05Rik  
 1438798\_at 1.13069 RIKEN cDNA 4931406P16 gene 4931406P16Rik  
 1438799\_at 0.90131 Dlx6 opposite strand transcript 1 Dlx6os1  
 1438800\_at 1.20539 N-acetylglucosamine kinase Nagk  
 1438801\_at 0.97884 dynamin 3 Dnm3  
 1438802\_at 1.76286 Forkhead box P1 Foxp1  
 1438803\_s\_at 0.98141 sorting nexin 16 Snx16  
 1438804\_at 1.07046 septin 10 10-Sep  
 1438805\_at 1.09067 RIKEN cDNA 9230106B05 gene 9230106B05Rik  
 1438806\_at 0.92867 B-cell CLL/lymphoma 9-like Bcl9l  
 1438807\_at 1.32039 Heterogeneous nuclear ribonucleoprotein R Hnrpr  
 1438808\_at 1.01850 transformation related protein 53 Trp53  
 1438809\_at 0.78443 "ATP synthase, H+ transporting, mitochondrial F1 complex, gamma  
 polypeptide 1" Atp5c1  
 1438810\_at 1.07333 "DNA segment, Chr 10, ERATO Doi 755, expressed" D10Ert755e  
 1438811\_at 1.23694 "discs, large homolog 7 (Drosophila)" Dlg7  
 1438812\_x\_at 0.89285 ubiquitin specific peptidase 19 Usp19  
 1438813\_at 1.02849 RIKEN cDNA 1700003O08 gene 1700003O08Rik  
 1438814\_at 1.65898 --- ---  
 1438815\_at 0.71022 "histone 2, H2aa2" Hist2h2aa2  
 1438816\_at 1.34902 AT hook containing transcription factor 1 Ahctf1  
 1438817\_at 1.47391 DNA2 DNA replication helicase 2-like (yeast) Dna2l

1438818\_at 1.06231 NMD3 homolog (*S. cerevisiae*) Nmd3  
1438819\_at 1.17272 Transcribed locus ---  
1438820\_at 1.09993 ring finger protein 17 Rnf17  
1438821\_at 1.27086 Ring finger and WD repeat domain 2 Rfwd2  
1438822\_at 0.82799 dorso-medial telencephalon gene 2 Dmt2  
1438823\_at 1.00955 Transcribed locus ---  
1438824\_at 1.67416 "solute carrier family 20, member 1" Slc20a1  
1438825\_at 0.96559 Calmodulin 3 Calm3  
1438826\_x\_at 0.96743 calmodulin 3 Calm3  
1438827\_at 1.00643 Glutaminase Glu  
1438828\_at 1.52911 Rap guanine nucleotide exchange factor (GEF) 6 Rapgef6  
1438829\_at 0.81401 "gene model 96, (NCBI)" Gm96  
1438830\_at 0.91643 "In vitro fertilized eggs cDNA, RIKEN full-length enriched library, clone:7420422E11 product:hypothetical protein, full insert sequence" ---  
1438831\_at 1.76904 "Cdc2-related kinase, arginine/serine-rich" Crkrs  
1438832\_x\_at 0.93796 DEAH (Asp-Glu-Ala-His) box polypeptide 30 Dhx30  
1438833\_at 0.96823 cancer susceptibility candidate 5 /// similar to cancer susceptibility candidate 5 isoform 2 Casc5 /// LOC677208  
1438834\_at 1.99605 motile sperm domain containing 2 Mospd2  
1438835\_a\_at 1.03554 elongation factor Tu GTP binding domain containing 2 Eftud2  
1438836\_at 0.96794 Elongation factor Tu GTP binding domain containing 2 Eftud2  
1438837\_at 1.00877 "Cholinergic receptor, nicotinic, alpha polypeptide 9" Chrna9  
1438838\_at 1.06907 RIKEN cDNA B230206F22 gene B230206F22Rik  
1438839\_a\_at 1.05010 "tyrosine 3-monooxygenase/tryptophan 5-monooxygenase activation protein, epsilon polypeptide" Ywhae  
1438840\_x\_at 1.04608 apolipoprotein A-I Apoa1  
1438841\_s\_at 1.00594 arginase type II Arg2  
1438842\_at 1.07587 mitochondrial carrier homolog 2 (*C. elegans*) Mtch2  
1438843\_x\_at 1.09307 mitochondrial carrier homolog 2 (*C. elegans*) Mtch2  
1438844\_x\_at 1.01755 spermatogenesis associated 5 Spata5  
1438845\_at 0.91340 inositol hexaphosphate kinase 1 Ihpk1  
1438846\_x\_at 0.94745 inositol hexaphosphate kinase 1 Ihpk1  
1438847\_at 0.93938 Max dimerization protein 3 Mxd3  
1438848\_at 1.35247 Recombining binding protein suppressor of hairless (*Drosophila*) Rbpsuh  
1438849\_at 0.93153 --- ---  
1438850\_at 1.03523 claudin 1 Cldn1  
1438851\_x\_at 0.86991 claudin 1 Cldn1  
1438852\_x\_at 0.86891 "minichromosome maintenance deficient 6 (MIS5 homolog, *S. pombe*) (*S. cerevisiae*)" Mcm6  
1438853\_x\_at 1.07069 DEAD (Asp-Glu-Ala-Asp) box polypeptide 54 Ddx54  
1438854\_x\_at 0.99231 phosphatidylinositol membrane-associated 1 Pitpm1  
1438855\_x\_at 1.37289 "tumor necrosis factor, alpha-induced protein 2" Tnfaip2  
1438856\_x\_at 1.03729 "serine (or cysteine) peptidase inhibitor, clade B, member 5" Serpinb5

1438857\_x\_at 1.16776 --- ---  
1438858\_x\_at 1.00906 "Histocompatibility 2, class II antigen A, alpha" H2-Aa  
1438859\_x\_at 0.88558 ribosomal protein S29 /// similar to 40S ribosomal protein S29 /// similar to  
40S ribosomal protein S29 Rps29 /// LOC629957 /// LOC637599  
1438860\_a\_at 1.02107 "solute carrier family 44, member 2" Slc44a2  
1438861\_at 1.03385 basonuclin 2 Bnc2  
1438862\_at 1.43783 RIKEN cDNA A630005I04 gene A630005I04Rik  
1438863\_at 0.99640 RIKEN cDNA A530079E22 gene A530079E22Rik  
1438864\_at 2.02402 RIKEN cDNA C920006C10 gene C920006C10Rik  
1438865\_at 0.91516 histocompatibility 13 H13  
1438866\_at 1.06309 "glutamate receptor ionotropic, NMDA3A" Grin3a  
1438867\_at 0.92124 "gene model 1070, (NCBI)" Gm1070  
1438868\_at 1.02196 "DNA segment, Chr 14, ERATO Doi 668, expressed" D14Ertd668e  
1438869\_at 1.12023 RIKEN cDNA 4930515G01 gene 4930515G01Rik  
1438870\_at 1.01460 --- ---  
1438871\_at 1.11847 Son cell proliferation protein Son  
1438872\_at 1.04287 cDNA sequence BC050188 BC050188  
1438873\_at 1.04535 --- ---  
1438874\_at 1.16635 "non-metastatic cells 7, protein expressed in" Nme7  
1438875\_at 1.03859 KRAB box containing protein RP23-221M24.3  
1438876\_at 0.90285 RIKEN cDNA A130014A01 gene A130014A01Rik  
1438877\_at 1.13810 "transient receptor potential cation channel, subfamily M, member 6" Trpm6  
1438878\_at 2.45797 RIKEN cDNA 6430537K16 gene 6430537K16Rik  
1438879\_at 1.00726 Dimethylarginine dimethylaminohydrolase 1 Ddah1  
1438880\_at 1.14338 RIKEN cDNA 1700012D14 gene 1700012D14Rik  
1438881\_at 0.90935 "vezatin, adherens junctions transmembrane protein" Vezt  
1438882\_at 2.72249 Rho GTPase activating protein 18 Arhgap18  
1438883\_at 1.01016 fibroblast growth factor 5 Fgf5  
1438884\_at 0.92267 RIKEN cDNA D830007B15 gene D830007B15Rik  
1438885\_at 0.97417 expressed sequence BB182387 BB182387  
1438886\_at 1.03869 hairy/enhancer-of-split related with YRPW motif-like Heyl  
1438887\_a\_at 1.01395 germ cell-less homolog 1 (Drosophila) Gmcl1  
1438888\_at 1.09851 germ cell-less homolog 1 (Drosophila) Gmcl1  
1438889\_at 1.13345 "15 days embryo head cDNA, RIKEN full-length enriched library, clone:  
D930025C07 product:unclassifiable, full insert sequence" ---  
1438890\_at 1.34643 --- ---  
1438891\_at 1.03329 "Catenin (cadherin associated protein), delta 2" Ctnnd2  
1438892\_at 1.32946 Quaking Qk  
1438893\_at 0.98848 RIKEN cDNA 5530601H04 gene 5530601H04Rik  
1438894\_at 1.05529 "16 days embryo head cDNA, RIKEN full-length enriched library, clone:  
C130060L08 product:unclassifiable, full insert sequence" ---  
1438895\_at 2.26036 RIKEN cDNA A430102J17 gene A430102J17Rik  
1438896\_at 1.11471 "DnaJ (Hsp40) homolog, subfamily C, member 6" Dnajc6

1438897\_at 1.08094 "Zinc finger, DHHC domain containing 3" Zdhhc3  
1438898\_at 0.98836 "Adult male corpora quadrigemina cDNA, RIKEN full-length enriched library, clone:B230310B10 product:unclassifiable, full insert sequence" ---  
1438899\_at 0.98174 Kruppel-like factor 17 Klf17  
1438900\_at 1.86752 "SAC1 (suppressor of actin mutations 1, homolog)-like (S. cerevisiae)" Sacm11  
1438901\_at 0.89631 cDNA sequence BC024814 BC024814  
1438902\_a\_at 1.04924 "heat shock protein 90kDa alpha (cytosolic), class A member 1" Hsp90aa1  
1438903\_at 1.07527 Macrophage erythroblast attacher Maea  
1438904\_at 0.73509 NHS-like 1 Nhs11  
1438905\_x\_at 0.97432 RIKEN cDNA C030046I01 gene C030046I01Rik  
1438906\_at 3.45713 --- ---  
1438907\_at 0.94281 "3 days neonate thymus cDNA, RIKEN full-length enriched library, clone: A630033C13 product:unclassifiable, full insert sequence" ---  
1438908\_at 0.84199 mitogen activated protein kinase kinase kinase 12 Map3k12  
1438909\_at 0.95962 saccharopine dehydrogenase (putative) Sccpdh  
1438910\_a\_at 0.92597 stomatin Stom  
1438911\_at 0.98692 Septin 7 7-Sep  
1438912\_at 0.90225 "hepatoma-derived growth factor, related protein 2" Hdgfrp2  
1438913\_x\_at 1.04118 "hepatoma-derived growth factor, related protein 2" Hdgfrp2  
1438914\_at 1.09589 RIKEN cDNA 2310028N02 gene 2310028N02Rik  
1438915\_at 0.93806 RIKEN cDNA 6720401G13 gene 6720401G13Rik  
1438916\_x\_at 0.86724 RIKEN cDNA 6720401G13 gene 6720401G13Rik  
1438917\_x\_at 0.98848 nucleoporin 62 Nup62  
1438918\_at 0.96973 farnesyl diphosphate farnesyl transferase 1 /// similar to farnesyl diphosphate farnesyl transferase 1 Fdft1 /// LOC627717  
1438919\_x\_at 1.00469 farnesyl diphosphate farnesyl transferase 1 /// similar to farnesyl diphosphate farnesyl transferase 1 Fdft1 /// LOC627717  
1438920\_x\_at 1.05201 Complement receptor related protein Crry  
1438921\_at 1.05059 Ataxia telangiectasia and Rad3 related Atr  
1438922\_x\_at 1.12206 "solute carrier family 25 (mitochondrial carrier, adenine nucleotide translocator), member 5 /// similar to ADP/ATP translocase 2 (Adenine nucleotide translocator 2) (ANT 2) (ADP,ATP carrier protein 2) (Solute carrier family 25 member 5) /// similar to ADP/ATP translocase 2 (Adenine nucleotide translocator 2) (ANT 2) (ADP,ATP carrier protein 2) (Solute carrier family 25 member 5) /// similar to ADP/ATP translocase 2 (Adenine nucleotide translocator 2) (ANT 2) (ADP, ATP carrier protein 2) (Solute carrier family 25 member 5) /// similar to solute carrier family 25, member A6" Slc25a5 /// LOC433326 /// LOC630624 /// LOC669381 /// LOC672115  
1438923\_at 0.90390 Fibroblast growth factor (acidic) intracellular binding protein Fibp  
1438924\_x\_at 0.91707 Fibroblast growth factor (acidic) intracellular binding protein Fibp  
1438925\_x\_at 1.08685 "ATPase, H+ transporting, lysosomal V0 subunit C" Atp6v0c  
1438926\_at 1.06711 "Transcribed locus, strongly similar to NP\_063918.1 ribosomal protein L36a [Mus musculus]" ---  
1438927\_x\_at 0.98053 similar to 60S ribosomal protein L23a /// ribosomal protein L23a /// hypothetical gene supported by BC029892 /// hypothetical gene supported by BC029892 /// similar to

60S ribosomal protein L23a /// similar to 60S ribosomal protein L23a /// similar to 60S ribosomal protein L23a /// hypothetical LOC631470 /// similar to 60S ribosomal protein L23a LOC227054 /// Rpl23a /// LOC384840 /// LOC385336 /// LOC619975 /// LOC620750 /// LOC621498 /// LOC631470 /// LOC666448 /// LOC666501 /// LOC666548 /// LOC666738 /// LOC666790  
 1438928\_x\_at 0.97216 ninjurin 1 Ninj1  
 1438929\_at 1.20019 --- ---  
 1438930\_s\_at 0.73965 methyl CpG binding protein 2 Mecp2  
 1438931\_s\_at 0.85971 sestrin 1 Sesn1  
 1438932\_at 1.01356 "RAS, guanyl releasing protein 2" Rasgrp2  
 1438933\_x\_at 0.93936 "RAS, guanyl releasing protein 2" Rasgrp2  
 1438934\_x\_at 0.95046 "sema domain, immunoglobulin domain (Ig), transmembrane domain (TM) and short cytoplasmic domain, (semaphorin) 4A" Sema4a  
 1438935\_at 0.95552 expressed sequence BB234005 BB234005  
 1438936\_s\_at 0.99513 "angiogenin, ribonuclease A family, member 1" Ang1  
 1438937\_x\_at 1.02637 "angiogenin, ribonuclease A family, member 1" Ang1  
 1438938\_x\_at 1.07114 prohibitin 2 Phb2  
 1438939\_x\_at 1.04118 necdin Ndn  
 1438940\_x\_at 0.92364 high mobility group nucleosomal binding domain 1 Hmgn1  
 1438941\_x\_at 1.03471 adenosine monophosphate deaminase 2 (isoform L) Ampd2  
 1438942\_x\_at 1.03623 "transglutaminase 2, C polypeptide" Tgm2  
 1438943\_x\_at 0.97388 ribophorin I Rpn1  
 1438944\_at 0.98254 RIKEN cDNA 1700007J24 gene 1700007J24Rik  
 1438945\_x\_at 0.94851 gap junction membrane channel protein alpha 1 Gjal  
 1438946\_at 0.99703 "platelet derived growth factor receptor, alpha polypeptide" Pdgfra  
 1438947\_x\_at 0.89488 "sema domain, immunoglobulin domain (Ig), short basic domain, secreted, (semaphorin) 3 F" Sema3f  
 1438948\_x\_at 0.90622 translocator protein Tspo  
 1438949\_at 1.00865 resistance to inhibitors of cholinesterase 8 homolog (C. elegans) Ric8  
 1438950\_x\_at 1.05313 resistance to inhibitors of cholinesterase 8 homolog (C. elegans) Ric8  
 1438951\_x\_at 0.98161 nucleoporin 54 Nup54  
 1438952\_x\_at 1.03894 TAR (HIV) RNA binding protein 2 Tarbp2  
 1438953\_at 1.08394 --- ---  
 1438954\_x\_at 1.08134 --- ---  
 1438955\_x\_at 1.02065 peptidylprolyl isomerase F (cyclophilin F) Ppif  
 1438956\_x\_at 1.06072 proviral integration site 3 Pim3  
 1438957\_x\_at 1.08122 CDP-diacylglycerol synthase (phosphatidate cytidyltransferase) 2 Cds2  
 1438958\_x\_at 1.04772 FK506 binding protein 1a Fkbp1a  
 1438959\_x\_at 0.97398 Transcribed locus ---  
 1438960\_at 0.91263 --- ---  
 1438961\_s\_at 0.97493 bleomycin hydrolase Blmh  
 1438962\_s\_at 1.04897 DEAD/H (Asp-Glu-Ala-Asp/His) box polypeptide 31 Ddx31



1438963\_s\_at 0.99069 TCF3 (E2A) fusion partner Tfpt  
1438964\_x\_at 0.94536 TCF3 (E2A) fusion partner Tfpt  
1438965\_x\_at 0.97272 RIKEN cDNA A230056P14 gene A230056P14Rik  
1438966\_x\_at 0.66852 fibromodulin Fmod  
1438967\_x\_at 0.94364 anti-Mullerian hormone type 2 receptor Amhr2  
1438968\_x\_at 1.01778 "serine protease inhibitor, Kunitz type 2" Spint2  
1438969\_x\_at 0.92886 DEAH (Asp-Glu-Ala-His) box polypeptide 30 Dhx30  
1438970\_x\_at 0.96292 RIKEN cDNA 1700034F02 gene 1700034F02Rik  
1438971\_x\_at 0.78211 ubiquitin-conjugating enzyme E2H Ube2h  
1438972\_x\_at 0.95604 RIKEN cDNA 2810410L24 gene 2810410L24Rik  
1438973\_x\_at 0.93458 gap junction membrane channel protein alpha 1 Gja1  
1438974\_x\_at 0.88949 phosphatidylinositol membrane-associated 1 Pitpm1  
1438975\_x\_at 0.93744 "zinc finger, DHHC domain containing 14" Zdhhc14  
1438976\_x\_at 1.01690 "methionine adenosyltransferase II, alpha" Mat2a  
1438977\_x\_at 1.04732 "RAN, member RAS oncogene family /// similar to RAN, member RAS oncogene family" Ran /// LOC671251  
1438978\_x\_at 0.95010 necdin Ndn  
1438979\_s\_at 0.98886 RIKEN cDNA 1700029I15 gene 1700029I15Rik  
1438980\_x\_at 0.91695 RIKEN cDNA 4732466D17 gene 4732466D17Rik  
1438981\_at 1.01904 "Protein kinase C, beta 1" Prkcb1  
1438982\_s\_at 0.83657 RIKEN cDNA 2810417J12 gene 2810417J12Rik  
1438983\_x\_at 0.82767 expressed sequence AI413782 AI413782  
1438984\_x\_at 0.99998 "proteasome (prosome, macropain) subunit, beta type 4" Psmb4  
1438985\_x\_at 1.00953 OTU domain containing 5 Otud5  
1438986\_x\_at 1.05531 ribosomal protein S17 Rps17  
1438987\_at 0.93007 --- ---  
1438988\_x\_at 1.01085 hematological and neurological expressed sequence 1 Hn1  
1438989\_s\_at 0.58003 RIKEN cDNA B130021B11 gene B130021B11Rik  
1438990\_x\_at 0.92626 IQ motif containing F3 Iqcf3  
1438991\_x\_at 0.91722 "protein phosphatase 2 (formerly 2A), regulatory subunit A (PR 65), alpha isoform" Ppp2r1a  
1438992\_x\_at 0.93780 activating transcription factor 4 Atf4  
1438993\_a\_at 1.01066 "ATPase, H+ transporting, lysosomal V1 subunit D" Atp6v1d  
1438994\_at 0.94861 hyaluronoglucosaminidase 5 Hyal5  
1438995\_at 1.10202 RIKEN cDNA 6330500D04 gene 6330500D04Rik  
1438996\_at 0.93716 "gene model 118, (NCBI)" Gm118  
1438997\_at 1.09275 Endoplasmic reticulum (ER) to nucleus signalling 1 Ern1  
1438998\_at 1.00927 RAS p21 protein activator 1 Rasa1  
1438999\_a\_at 1.00224 nuclear factor of activated T-cells 5 Nfat5  
1439000\_at 1.09844 acyl-CoA synthetase bubblegum family member 2 Acsbg2  
1439001\_at 1.04863 hypothetical protein LOC665286 /// hypothetical protein LOC677425  
LOC665286 /// LOC677425  
1439002\_s\_at 1.07525 chorionic somatomammotropin hormone 1 Csh1

1439003\_s\_at 0.87484 RIKEN cDNA 1700008F21 gene /// similar to coiled-coil domain containing  
7 1700008F21Rik /// LOC672965

1439004\_at 0.84786 "ribosomal protein S6 kinase, polypeptide 5" Rps6ka5

1439005\_x\_at 1.06874 "tyrosine 3-monooxygenase/tryptophan 5-monooxygenase activation protein,  
zeta polypeptide" Ywhaz

1439006\_x\_at 0.97295 RIKEN cDNA 6430550H21 gene 6430550H21Rik

1439007\_at 0.93691 "asparagine-linked glycosylation 6 homolog (yeast, alpha-1,3,-  
glucosyltransferase)" Alg6

1439008\_at 0.80225 zinc finger protein 319 Zfp319

1439009\_at 1.01658 guanine nucleotide binding protein-like 3 (nucleolar)-like Gnl3l

1439010\_at 1.16857 RIKEN cDNA D330037H05 gene /// similar to La-related protein 4 (La  
ribonucleoprotein domain family member 4) /// similar to La-related protein 4 (La ribonucleoprotein  
domain family member 4) D330037H05Rik /// LOC673040 /// LOC677019

1439011\_at 1.01515 Transcribed locus ---

1439012\_a\_at 0.93324 deoxycytidine kinase Dck

1439013\_x\_at 0.90596 "acylphosphatase 1, erythrocyte (common) type" Acyp1

1439014\_at 0.86162 RIKEN cDNA 1600021P15 gene 1600021P15Rik

1439015\_at 0.96889 glial cell line derived neurotrophic factor family receptor alpha 1 Gfra1

1439016\_x\_at 1.08844 small proline-rich protein 2A Sprr2a

1439017\_x\_at 0.89033 adiponectin receptor 1 Adipor1

1439018\_at 0.68392 RIKEN cDNA 6330505N24 gene 6330505N24Rik

1439019\_at 0.51752 Fraser syndrome 1 homolog (human) Fras1

1439020\_at 1.01682 expressed sequence AW146020 AW146020

1439021\_at 0.88337 "centaurin, beta 5" Centb5

1439022\_at 0.78129 phosphatase and actin regulator 1 Phactr1

1439023\_at 1.02971 DEAD (Asp-Glu-Ala-Asp) box polypeptide 55 Ddx55

1439024\_at 1.00270 BCL2-associated athanogene 4 Bag4

1439025\_at 0.88426 zinc finger protein 446 Zfp446

1439026\_at 1.03120 "transient receptor potential cation channel, subfamily M, member 3" Trpm3

1439027\_at 1.04249 RIKEN cDNA C330023M02 gene C330023M02Rik

1439028\_at 0.87077 ubiquitin-fold modifier 1 Ufm1

1439029\_at 1.02053 glutamic pyruvate transaminase (alanine aminotransferase) 2 Gpt2

1439030\_at 0.96513 GDP-mannose pyrophosphorylase B Gmppb

1439031\_at 0.99756 junctophilin 4 Jph4

1439032\_at 0.94913 centrosomal protein 27 Cep27

1439033\_at 1.20991 "zinc finger, CCHC domain containing 7" Zcchc7

1439034\_at 0.97066 sialophorin Spn

1439035\_at 1.05904 "12 days embryo spinal cord cDNA, RIKEN full-length enriched library, clone:  
C530050B12 product:unclassifiable, full insert sequence" ---

1439036\_a\_at 0.72867 "ATPase, Na<sup>+</sup>/K<sup>+</sup> transporting, beta 1 polypeptide" Atp1b1

1439037\_at 0.90095 DEAD (Asp-Glu-Ala-Asp) box polypeptide 17 Ddx17

1439038\_at 1.01491 RIKEN cDNA 9130227C08Rik gene 9130227C08Rik

1439039\_at 0.92458 transmembrane protein 104 Tmem104

1439040\_at 0.94957 centromere protein E Cenpe  
 1439041\_at 1.01729 "solute carrier family 39 (zinc transporter), member 10" Slc39a10  
 1439042\_at 0.91465 adenylate cyclase activating polypeptide 1 receptor 1 Adcyap1r1  
 1439043\_at 1.22560 transformer 2 alpha homolog (Drosophila) Tra2a  
 1439044\_at 0.69787 zinc finger protein 354C Zfp354c  
 1439045\_x\_at 0.95134 membrane targeting (tandem) C2 domain containing 1 Mtac2d1  
 1439046\_at 1.08238 coiled-coil domain containing 55 Ccdc55  
 1439047\_s\_at 0.89310 RecQ protein-like Recql  
 1439048\_at 0.74305 RIKEN cDNA 2900078E11 gene 2900078E11Rik  
 1439049\_at 1.27745 DPH5 homolog (S. cerevisiae) Dph5  
 1439050\_at 0.86248 --- ---  
 1439051\_a\_at 1.06833 MAP/microtubule affinity-regulating kinase 4 Mark4  
 1439052\_at 1.07082 RIKEN cDNA 5430433G21 gene 5430433G21Rik  
 1439053\_at 1.08340 "DNA segment, Chr 10, Brigham & Women's Genetics 1070 expressed"  
 D10Bwg1070e  
 1439054\_at 0.97854 "zinc finger protein 36, C3H type-like 2" Zfp3612  
 1439055\_at 0.91318 hypothetical LOC217066 LOC217066  
 1439056\_at 1.05600 hypothetical protein LOC636791 LOC636791  
 1439057\_x\_at 0.97299 "zinc finger, DHHC domain containing 6" Zdhhc6  
 1439058\_at 0.91499 splicing factor proline/glutamine rich (polypyrimidine tract binding protein  
 associated) Sfpq  
 1439059\_at 1.03758 CDNA sequence BC031748 BC031748  
 1439060\_s\_at 0.89353 "WD repeat domain, phosphoinositide interacting 1" Wipi1  
 1439061\_at 1.22787 coiled-coil domain containing 84 Ccdc84  
 1439062\_at 0.97080 kelch repeat and BTB (POZ) domain containing 3 Kbtbd3  
 1439063\_at 1.30060 additional sex combs like 2 (Drosophila) Asxl2  
 1439064\_at 0.92765 cDNA sequence BC030046 BC030046  
 1439065\_x\_at 1.02558 Similar to zinc finger protein 665 MGC117846  
 1439066\_at 1.03871 angiopoietin 1 Angpt1  
 1439067\_at 1.02984 leukocyte-associated Ig-like receptor 1 Lair1  
 1439068\_at 1.24821 type 1 tumor necrosis factor receptor shedding aminopeptidase regulator Arts1  
 1439069\_a\_at 0.94014 RIKEN cDNA 4933439C20 gene 4933439C20Rik  
 1439070\_x\_at 0.94577 RIKEN cDNA 4933439C20 gene /// RIKEN cDNA D030013I16 gene  
 4933439C20Rik /// D030013I16Rik  
 1439071\_at 0.99949 RIKEN cDNA 5430416N02 gene 5430416N02Rik  
 1439072\_at 0.94107 "solute carrier family 1 (glial high affinity glutamate transporter), member 3"  
 Slc1a3  
 1439073\_at 1.13738 similar to Afadin (Af-6 protein) LOC627912  
 1439074\_a\_at 1.01993 Son cell proliferation protein Son  
 1439075\_at 1.09510 polymerase (RNA) III (DNA directed) polypeptide F Polr3f  
 1439076\_at 0.97348 DEAH (Asp-Glu-Ala-His) box polypeptide 29 Dhx29  
 1439077\_at 0.90398 "zinc finger, X-linked, duplicated A /// similar to Zinc finger X-linked protein  
 ZXDA" Zxda /// LOC668171

|              |         |                                                                                                                                                                                                                                                                                                                                                                                                                                                                                                                                                                                                                                      |               |
|--------------|---------|--------------------------------------------------------------------------------------------------------------------------------------------------------------------------------------------------------------------------------------------------------------------------------------------------------------------------------------------------------------------------------------------------------------------------------------------------------------------------------------------------------------------------------------------------------------------------------------------------------------------------------------|---------------|
| 1439078_at   | 1.11143 | kelch-like 4 (Drosophila)                                                                                                                                                                                                                                                                                                                                                                                                                                                                                                                                                                                                            | Klhl4         |
| 1439079_a_at | 1.53988 | ErbB2 interacting protein                                                                                                                                                                                                                                                                                                                                                                                                                                                                                                                                                                                                            | ErbB2ip       |
| 1439080_at   | 1.36817 | ErbB2 interacting protein                                                                                                                                                                                                                                                                                                                                                                                                                                                                                                                                                                                                            | ErbB2ip       |
| 1439081_at   | 2.43054 | meningioma expressed antigen 5 (hyaluronidase)                                                                                                                                                                                                                                                                                                                                                                                                                                                                                                                                                                                       | Mgea5         |
| 1439082_at   | 1.11093 | DEAD (Asp-Glu-Ala-Asp) box polypeptide 50                                                                                                                                                                                                                                                                                                                                                                                                                                                                                                                                                                                            | Ddx50         |
| 1439083_at   | 0.89545 | Abelson helper integration site                                                                                                                                                                                                                                                                                                                                                                                                                                                                                                                                                                                                      | Ahi1          |
| 1439084_at   | 0.93669 | chemokine (C-X-C motif) ligand 12                                                                                                                                                                                                                                                                                                                                                                                                                                                                                                                                                                                                    | Cxcl12        |
| 1439085_at   | 0.95810 | RIKEN cDNA C130039O16 gene                                                                                                                                                                                                                                                                                                                                                                                                                                                                                                                                                                                                           | C130039O16Rik |
| 1439086_at   | 0.98965 | RIKEN cDNA A930009L07 gene                                                                                                                                                                                                                                                                                                                                                                                                                                                                                                                                                                                                           | A930009L07Rik |
| 1439087_a_at | 0.76985 | RIKEN cDNA 1500004A08 gene                                                                                                                                                                                                                                                                                                                                                                                                                                                                                                                                                                                                           | 1500004A08Rik |
| 1439088_at   | 1.06971 | PDZ domain containing 8                                                                                                                                                                                                                                                                                                                                                                                                                                                                                                                                                                                                              | Pdzd8         |
| 1439089_at   | 0.94480 | zinc finger and BTB domain containing 41 homolog                                                                                                                                                                                                                                                                                                                                                                                                                                                                                                                                                                                     | Zbtb41        |
| 1439090_at   | 1.34029 | RIKEN cDNA D030022P07 gene                                                                                                                                                                                                                                                                                                                                                                                                                                                                                                                                                                                                           | D030022P07Rik |
| 1439091_at   | 1.03178 | "Fanconi anemia, complementation group D2"                                                                                                                                                                                                                                                                                                                                                                                                                                                                                                                                                                                           | Fancd2        |
| 1439092_at   | 1.12445 | nuclear RNA export factor 1 homolog (S. cerevisiae)                                                                                                                                                                                                                                                                                                                                                                                                                                                                                                                                                                                  | Nxf1          |
| 1439093_at   | 1.37289 | ---                                                                                                                                                                                                                                                                                                                                                                                                                                                                                                                                                                                                                                  | ---           |
| 1439094_at   | 1.41323 | "clathrin, heavy polypeptide (Hc)"                                                                                                                                                                                                                                                                                                                                                                                                                                                                                                                                                                                                   | Cltc          |
| 1439095_at   | 1.04960 | "splicing factor, arginine/serine-rich 11"                                                                                                                                                                                                                                                                                                                                                                                                                                                                                                                                                                                           | Sfrs11        |
| 1439096_at   | 0.87252 | D-aspartate oxidase                                                                                                                                                                                                                                                                                                                                                                                                                                                                                                                                                                                                                  | Ddo           |
| 1439097_at   | 1.14043 | "DNA segment, Chr 10, Wayne State University 52, expressed"                                                                                                                                                                                                                                                                                                                                                                                                                                                                                                                                                                          | D10Wsu52e     |
| 1439098_at   | 1.06413 | RIKEN cDNA E230013L22 gene                                                                                                                                                                                                                                                                                                                                                                                                                                                                                                                                                                                                           | E230013L22Rik |
| 1439099_at   | 1.02673 | neuro-oncological ventral antigen 2                                                                                                                                                                                                                                                                                                                                                                                                                                                                                                                                                                                                  | Nova2         |
| 1439100_s_at | 1.08297 | ---                                                                                                                                                                                                                                                                                                                                                                                                                                                                                                                                                                                                                                  | ---           |
| 1439101_at   | 0.96661 | RIKEN cDNA D830007F02 gene                                                                                                                                                                                                                                                                                                                                                                                                                                                                                                                                                                                                           | D830007F02Rik |
| 1439102_at   | 1.04969 | fetal Alzheimer antigen                                                                                                                                                                                                                                                                                                                                                                                                                                                                                                                                                                                                              | Falz          |
| 1439103_at   | 0.99015 | "Vcell division cycle 73, Paf1/RNA polymerase II complex component, homolog (S. cerevisiae)"                                                                                                                                                                                                                                                                                                                                                                                                                                                                                                                                         | Cdc73         |
| 1439104_at   | 0.92966 | RIKEN cDNA C230081A13 gene                                                                                                                                                                                                                                                                                                                                                                                                                                                                                                                                                                                                           | C230081A13Rik |
| 1439105_at   | 0.92285 | cytidine and dCMP deaminase domain containing 1                                                                                                                                                                                                                                                                                                                                                                                                                                                                                                                                                                                      | Cdadc1        |
| 1439106_at   | 0.96667 | zinc finger protein 462                                                                                                                                                                                                                                                                                                                                                                                                                                                                                                                                                                                                              | Zfp462        |
| 1439107_a_at | 1.06963 | myeloid/lymphoid or mixed-lineage leukemia 5                                                                                                                                                                                                                                                                                                                                                                                                                                                                                                                                                                                         | Mll5          |
| 1439108_at   | 0.98237 | myeloid/lymphoid or mixed-lineage leukemia 5                                                                                                                                                                                                                                                                                                                                                                                                                                                                                                                                                                                         | Mll5          |
| 1439109_at   | 0.89807 | coiled-coil domain containing 68                                                                                                                                                                                                                                                                                                                                                                                                                                                                                                                                                                                                     | Ccdc68        |
| 1439110_at   | 0.98859 | RIKEN cDNA A930012O16 gene                                                                                                                                                                                                                                                                                                                                                                                                                                                                                                                                                                                                           | A930012O16Rik |
| 1439111_at   | 0.98303 | ---                                                                                                                                                                                                                                                                                                                                                                                                                                                                                                                                                                                                                                  | ---           |
| 1439112_at   | 0.87608 | RIKEN cDNA 2810442I21 gene                                                                                                                                                                                                                                                                                                                                                                                                                                                                                                                                                                                                           | 2810442I21Rik |
| 1439113_at   | 0.90330 | RIKEN cDNA 2410018L13 gene /// RIKEN cDNA 6030426L16 gene /// similar to RIKEN cDNA 6030426L16 /// similar to gonadotropin inducible ovarian transcription factor 1 /// similar to gonadotropin inducible ovarian transcription factor 1 /// similar to gonadotropin inducible ovarian transcription factor 1 /// similar to gonadotropin inducible ovarian transcription factor 1 /// similar to Hippocalcin-like protein 1 (Visinin-like protein 3) (VILIP-3) (Neural visinin-like protein 3) (NVL-3) (NVP-3) /// similar to Hippocalcin-like protein 1 (Visinin-like protein 3) (VILIP-3) (Neural visinin-like protein 3) (NVL-3) |               |

(NVP-3) 2410018L13Rik /// 6030426L16Rik /// LOC245297 /// LOC668553 /// LOC668645 ///  
 LOC668662 /// LOC668701 /// LOC668710 /// LOC675539 /// LOC675641  
 1439114\_at 0.98161 cDNA sequence BC013672 BC013672  
 1439115\_at 1.02678 "microcephaly, primary autosomal recessive 1" Mcph1  
 1439116\_at 0.92250 "Cofactor required for Sp1 transcriptional activation, subunit 2" Crsp2  
 1439117\_at 0.74687 calmin Clmn  
 1439118\_at 1.04170 "solute carrier family 35, member E4" Slc35e4  
 1439119\_a\_at 0.97685 cDNA sequence BC010304 BC010304  
 1439120\_at 0.98551 cDNA sequence BC010304 BC010304  
 1439121\_at 0.97491 "histocompatibility 2, T region locus 22" H2-T22  
 1439122\_at 1.06714 --- ---  
 1439123\_at 2.66248 PHD finger protein 21A Phf21a  
 1439124\_at 0.96374 RIKEN cDNA 9530020G05 gene 9530020G05Rik  
 1439125\_at 1.43232 Adducin 1 (alpha) Add1  
 1439126\_at 1.72116 RIKEN cDNA 1110007A13 gene 1110007A13Rik  
 1439127\_at 0.91246 expressed sequence AI314180 AI314180  
 1439128\_at 1.04634 zinc finger and BTB domain containing 20 Zbtb20  
 1439129\_at 1.07209 RIKEN cDNA 1110060D06 gene /// dedicator of cytokinesis 5  
 1110060D06Rik /// Dock5  
 1439130\_at 1.03790 autophagy-related 4D (yeast) Atg4d  
 1439131\_at 1.18152 RIKEN cDNA 4932441K18 gene 4932441K18Rik  
 1439132\_at 1.01822 PHD finger protein 8 Phf8  
 1439133\_at 0.97538 RIKEN cDNA 4930524O07 gene 4930524O07Rik  
 1439134\_s\_at 0.94393 RIKEN cDNA 4930524O07 gene 4930524O07Rik  
 1439135\_at 0.99743 "Adult male spinal cord cDNA, RIKEN full-length enriched library, clone:  
 A330034O07 product:unclassifiable, full insert sequence" ---  
 1439136\_at 2.06244 Single-stranded DNA binding protein 3 Ssbp3  
 1439137\_at 1.04295 "solute carrier family 4, sodium bicarbonate cotransporter, member 9" Slc4a9  
 1439138\_at 1.72087 RIKEN cDNA 2310035C23 gene 2310035C23Rik  
 1439139\_at 1.29639 "DNA segment, Chr 2, ERATO Doi 640, expressed" D2Ertd640e  
 1439140\_at 1.08466 RIKEN cDNA 1700019P01 gene 1700019P01Rik  
 1439141\_at 1.03675 G protein-coupled receptor 18 Gpr18  
 1439142\_at 0.99572 "Swi/SNF related matrix associated, actin dependent regulator of chromatin,  
 subfamily a-like 1" Smarcal1  
 1439143\_at 0.94865 hypothetical protein 9330167E06 9.33E+12  
 1439144\_at 1.00487 "CWF19-like 1, cell cycle control (S. pombe)" Cwf19l1  
 1439145\_at 1.01835 lymphocyte protein tyrosine kinase Lck  
 1439146\_s\_at 0.96209 lymphocyte protein tyrosine kinase Lck  
 1439147\_at 1.02491 RIKEN cDNA 1110049B09 gene 1110049B09Rik  
 1439148\_a\_at 1.27125 "phosphofructokinase, liver, B-type" Pfk1  
 1439149\_s\_at 0.95142 hypothetical protein LOC629141 LOC629141  
 1439150\_x\_at 0.91850 GH regulated TBC protein 1 Grtp1  
 1439151\_at 0.82713 methionine sulfoxide reductase B3 Msrb3

|              |         |                                                                     |               |
|--------------|---------|---------------------------------------------------------------------|---------------|
| 1439152_at   | 0.93354 | methenyltetrahydrofolate synthetase domain containing               | Mthfsd        |
| 1439153_at   | 0.91944 | IBR domain containing 2                                             | Ibrdc2        |
| 1439154_at   | 1.07315 | nucleoporin 98                                                      | Nup98         |
| 1439155_at   | 1.14911 | methyltransferase-like 1                                            | Mettl1        |
| 1439156_at   | 1.03363 | "gene model 962, (NCBI)"                                            | Gm962         |
| 1439157_at   | 1.06152 | RIKEN cDNA D330012D11 gene                                          | D330012D11Rik |
| 1439158_at   | 1.03203 | tousled-like kinase 1                                               | Tlk1          |
| 1439159_at   | 1.59390 | ---                                                                 | ---           |
| 1439160_at   | 0.90390 | RIKEN cDNA 4732496O08 gene                                          | 4732496O08Rik |
| 1439161_at   | 1.93352 | "SAPS domain family, member 3"                                      | Saps3         |
| 1439162_at   | 0.96276 | RIKEN cDNA 1700011J10 gene                                          | 1700011J10Rik |
| 1439163_at   | 0.93257 | zinc finger and BTB domain containing 16                            | Zbtb16        |
| 1439164_at   | 0.88749 | "cyclin-dependent kinase inhibitor 2C (p18, inhibits CDK4)"         | Cdkn2c        |
| 1439165_at   | 1.23932 | ---                                                                 | ---           |
| 1439166_at   | 1.16233 | nucleolar protein 11                                                | Nol11         |
| 1439167_at   | 0.95823 | peroxisomal trans-2-enoyl-CoA reductase                             | Pecr          |
| 1439168_at   | 1.83200 | "calcium/calmodulin-dependent protein kinase II, delta"             | Camk2d        |
| 1439169_at   | 1.39738 | Eukaryotic translation initiation factor 4E nuclear import factor 1 | Eif4enif1     |
| 1439170_at   | 1.00395 | ---                                                                 | ---           |
| 1439171_at   | 0.88038 | RIKEN cDNA C530008M17 gene                                          | C530008M17Rik |
| 1439172_at   | 1.02857 | ATPase type 13A5                                                    | Atp13a5       |
| 1439173_at   | 1.06717 | hook homolog 1 (Drosophila)                                         | Hook1         |
| 1439174_at   | 0.93445 | Unc-5 homolog C (C. elegans)                                        | Unc5c         |
| 1439175_at   | 1.00628 | "Protein tyrosine phosphatase, receptor type, D"                    | Ptprd         |
| 1439176_at   | 0.97286 | RIKEN cDNA E130120F12 gene                                          | E130120F12Rik |
| 1439177_at   | 0.93899 | Transcribed locus                                                   | ---           |
| 1439178_at   | 1.06897 | "adrenergic receptor kinase, beta 2"                                | Adrbk2        |
| 1439179_a_at | 0.84618 | RIKEN cDNA 5830405N20 gene                                          | 5830405N20Rik |
| 1439180_at   | 1.20363 | RIKEN cDNA A430093A21 gene                                          | A430093A21Rik |
| 1439181_at   | 1.04054 | cDNA sequence BC043301                                              | BC043301      |
| 1439182_at   | 0.85895 | "DNA segment, Chr 17, Wayne State University 92, expressed"         | D17Wsu92e     |
| 1439183_at   | 0.94727 | N-acylsphingosine amidohydrolase (alkaline ceramidase) 3            | Asah3         |
| 1439184_s_at | 1.07385 | thioredoxin-like 5                                                  | Txn15         |
| 1439185_x_at | 0.89955 | RIKEN cDNA D430028G21 gene                                          | D430028G21Rik |
| 1439186_at   | 1.01106 | RIKEN cDNA E130319B15 gene                                          | E130319B15Rik |
| 1439187_at   | 0.97068 | vacuolar protein sorting 13 D (yeast)                               | Vps13d        |
| 1439188_at   | 1.10464 | cleavage and polyadenylation specific factor 6                      | Cpsf6         |
| 1439189_at   | 1.09083 | RIKEN cDNA D630023B12 gene                                          | D630023B12Rik |
| 1439190_at   | 1.01764 | forkhead-associated (FHA) phosphopeptide binding domain 1           | Fhad1         |
| 1439191_at   | 1.03154 | ---                                                                 | ---           |
| 1439192_at   | 0.88530 | neuro-oncological ventral antigen 2                                 | Nova2         |
| 1439193_at   | 0.91004 | Paired related homeobox protein-like 1                              | Prrxl1        |
| 1439194_at   | 0.98228 | RIKEN cDNA C030048H21 gene                                          | C030048H21Rik |

1439195\_at 1.10333 --- ---  
1439196\_at 1.04066 hook homolog 3 (Drosophila) Hook3  
1439197\_at 0.89880 "phosphatidylinositol 4-kinase, catalytic, beta polypeptide" Pik4cb  
1439198\_at 2.59156 PTK2 protein tyrosine kinase 2 Ptk2  
1439199\_at 1.05125 "Adult male corpora quadrigemina cDNA, RIKEN full-length enriched library, clone:B230317E19 product:unclassifiable, full insert sequence" ---  
1439200\_x\_at 1.24344 Reproductive homeobox 4B Rhox4b  
1439201\_at 1.37829 ubiquitin specific peptidase 14 Usp14  
1439202\_at 0.97854 --- ---  
1439203\_at 0.83617 Special AT-rich sequence binding protein 1 Satb1  
1439204\_at 0.46704 "sodium channel, voltage-gated, type III, alpha" Scn3a  
1439205\_at 0.80592 "nuclear factor of activated T-cells, cytoplasmic, calcineurin-dependent 2" Nfatc2  
1439206\_at 1.01296 "Guanine nucleotide binding protein, alpha 12" Gna12  
1439207\_at 1.05078 paraneoplastic antigen family 5 Pnma5  
1439208\_at 0.93970 checkpoint kinase 1 homolog (S. pombe) Chek1  
1439209\_at 2.33777 Transcription factor 12 Tcf12  
1439210\_at 1.27992 mitochondrial ribosomal protein S9 Mrps9  
1439211\_at 1.00300 uromodulin-like 1 Umodl1  
1439212\_at 0.90399 hypothetical protein 6820429M01 6820429M01  
1439213\_at 1.11848 RIKEN cDNA 4921524J06 gene 4921524J06Rik  
1439214\_a\_at 1.03137 apoptosis inhibitor 5 Api5  
1439215\_at 1.02557 "ATPase, Ca<sup>++</sup>-sequestering" Atp2c1  
1439216\_at 1.32237 RIKEN cDNA 2900075B16 gene 2900075B16Rik  
1439217\_at 0.99502 "NACHT, LRR and PYD containing protein 9c" Nalp9c  
1439218\_at 1.09904 Uronyl-2-sulfotransferase Ust  
1439219\_at 0.91776 RIKEN cDNA A730082K24 gene A730082K24Rik  
1439220\_at 0.94324 "Ankyrin 3, epithelial" Ank3  
1439221\_s\_at 1.00424 CD40 antigen Cd40  
1439222\_at 0.96929 microrchidia 2B Morc2b  
1439223\_at 1.07569 tropomodulin 2 Tmod2  
1439224\_at 1.62288 Ankyrin repeat and IBR domain containing 1 Ankib1  
1439225\_at 0.89752 "leucyl-tRNA synthetase, mitochondrial" Lars2  
1439226\_at 0.84897 Dedicator of cytokinesis 8 Dock8  
1439227\_at 1.73670 "ubiquitin-like, containing PHD and RING finger domains, 1" Uhrf1  
1439228\_at 1.10653 zinc finger protein 407 Zfp407  
1439229\_at 0.86924 "pleckstrin homology domain containing, family A member 7" Plekha7  
1439230\_at 0.88554 RIKEN cDNA 4922505E12 gene 4922505E12Rik  
1439231\_at 0.96909 --- ---  
1439232\_at 0.92097 RIKEN cDNA 1500016L03 gene 1500016L03Rik  
1439233\_at 1.74527 Translocation protein 1 Tloc1  
1439234\_a\_at 0.87853 TM2 domain containing 2 Tm2d2  
1439235\_x\_at 0.85759 TM2 domain containing 2 Tm2d2

1439236\_at 0.91586 "DNA segment, Chr 15, ERATO Doi 509, expressed" D15Ert509e  
 1439237\_a\_at 0.88841 slingshot homolog 1 (Drosophila) Ssh1  
 1439238\_at 1.19739 unc-84 homolog B (C. elegans) Unc84b  
 1439239\_at 1.04708 lin-7 homolog B (C. elegans) Lin7b  
 1439240\_x\_at 0.96911 lin-7 homolog B (C. elegans) Lin7b  
 1439241\_x\_at 0.88704 steroid 5 alpha-reductase 2-like Srd5a2l  
 1439242\_at 1.10326 molybdenum cofactor synthesis 3 Mocs3  
 1439243\_x\_at 1.06634 "COP9 (constitutive photomorphogenic) homolog, subunit 5 (Arabidopsis thaliana)" Cops5  
 1439244\_a\_at 0.94724 trinucleotide repeat containing 6a Tnrc6a  
 1439245\_at 1.05090 trinucleotide repeat containing 6a Tnrc6a  
 1439246\_x\_at 0.86138 trinucleotide repeat containing 6a Tnrc6a  
 1439247\_at 1.02827 dedicator of cytokinesis 10 /// similar to Dedicator of cytokinesis protein 10 (Protein zizimin 3) Dock10 /// LOC630691  
 1439248\_at 1.13148 "RMI1, RecQ mediated genome instability 1, homolog (S. cerevisiae)" Rmi1  
 1439249\_at 0.86930 WW domain containing adaptor with coiled-coil Wac  
 1439250\_at 0.98513 "SLIT and NTRK-like family, member 3" Slitrk3  
 1439251\_at 0.66339 Transcribed locus ---  
 1439252\_at 1.43356 --- ---  
 1439253\_x\_at 1.13562 RIKEN cDNA 2610524G07 gene 2610524G07Rik  
 1439254\_at 0.93718 A kinase (PRKA) anchor protein 13 Akap13  
 1439255\_s\_at 1.06124 G protein-coupled receptor 137B /// similar to transmembrane 7 superfamily member 1 Gpr137b /// LOC664862  
 1439256\_x\_at 1.08010 G protein-coupled receptor 137B /// similar to transmembrane 7 superfamily member 1 Gpr137b /// LOC664862  
 1439257\_x\_at 0.99433 ribophorin I Rpn1  
 1439258\_at 1.09825 activating transcription factor 4 Atf4  
 1439259\_x\_at 0.83652 abhydrolase domain containing 4 Abhd4  
 1439260\_a\_at 1.01391 ectonucleotide pyrophosphatase/phosphodiesterase 3 Enpp3  
 1439261\_x\_at 1.08558 "MIT, microtubule interacting and transport, domain containing 1" Mitd1  
 1439262\_x\_at 0.84750 RIKEN cDNA 2310001A20 gene 2310001A20Rik  
 1439263\_at 0.99172 fibroblast growth factor inducible 15 Fin15  
 1439264\_x\_at 0.99023 LIM and SH3 protein 1 Lasp1  
 1439265\_at 0.93915 X Kell blood group precursor related family member 6 homolog Xkr6  
 1439266\_a\_at 0.97306 polymerase (RNA) III (DNA directed) polypeptide K Polr3k  
 1439267\_x\_at 0.92634 "cytochrome c oxidase, subunit Va" Cox5a  
 1439268\_x\_at 1.04984 "eukaryotic translation initiation factor 3, subunit 6" Eif3s6  
 1439269\_x\_at 0.92151 minichromosome maintenance deficient 7 (S. cerevisiae) /// similar to minichromosome maintenance protein 7 Mcm7 /// LOC433027  
 1439270\_x\_at 1.04315 "RAN, member RAS oncogene family /// similar to RAN, member RAS oncogene family" Ran /// LOC671251  
 1439271\_x\_at 0.91902 IK cytokine Ik  
 1439272\_at 0.91747 ligand dependent nuclear receptor corepressor-like Lcorl



1439273\_at 1.00219 receptor (TNFRSF)-interacting serine-threonine kinase 1 Ripk1  
1439274\_at 1.23523 RIKEN cDNA A230083H22 gene A230083H22Rik  
1439275\_s\_at 1.10120 RIKEN cDNA 9530010C24 gene 9530010C24Rik  
1439276\_at 1.69823 --- ---  
1439277\_at 0.83189 fibroblast growth factor receptor substrate 3 Frs3  
1439278\_at 1.01737 zinc finger and BTB domain containing 20 Zbtb20  
1439279\_at 1.03187 RIKEN cDNA 3110007F17 gene 3110007F17Rik  
1439280\_at 0.89328 RIKEN cDNA B230396O12 gene B230396O12Rik  
1439281\_at 0.91651 "PREDICTED: Mus musculus similar to solute carrier family 26, member 8 isoform a (LOC622293), mRNA" ---  
1439282\_at 1.01558 RIKEN cDNA D930023I05 gene D930023I05Rik  
1439283\_at 1.70572 Oxysterol binding protein-like 9 Osbpl9  
1439284\_at 0.98358 RIKEN cDNA E230025E14 gene E230025E14Rik  
1439285\_at 0.90491 inhibitor of Bruton agammaglobulinemia tyrosine kinase Ibtk  
1439286\_at 0.96298 "Glutamate receptor, ionotropic, kainate 2 (beta 2)" Grik2  
1439287\_at 0.77067 --- ---  
1439288\_at 0.91467 RIKEN cDNA 0710005I19 gene 0710005I19Rik  
1439289\_s\_at 0.98856 RIKEN cDNA 0710005I19 gene 0710005I19Rik  
1439290\_at 1.06354 "Fragile X mental retardation gene 1, autosomal homolog" Fxr1h  
1439291\_at 1.01520 "Adult male corpus striatum cDNA, RIKEN full-length enriched library, clone: C030002G09 product:unclassifiable, full insert sequence" ---  
1439292\_at 1.40604 RIKEN cDNA 2210408F21 gene 2210408F21Rik  
1439293\_at 0.92136 RIKEN cDNA C130047D21 gene C130047D21Rik  
1439294\_at 0.96989 hypothetical protein D530008I22 D530008I22  
1439295\_x\_at 0.95478 hypothetical LOC434179 LOC434179  
1439296\_at 1.01204 --- ---  
1439297\_at 1.12114 expressed sequence AI449441 AI449441  
1439298\_at 1.37843 --- ---  
1439299\_at 0.99858 Spectrin beta 2 Spnb2  
1439300\_at 1.19172 --- ---  
1439301\_at 2.20176 RAD51-like 1 (S. cerevisiae) Rad5111  
1439302\_at 0.90144 ubiquitin-activating enzyme E1-like 2 Ube112  
1439303\_at 0.80716 Neuronal growth regulator 1 Negr1  
1439304\_at 1.27073 RIKEN cDNA B230216N24 gene B230216N24Rik  
1439305\_at 1.42538 --- ---  
1439306\_at 0.98999 Small optic lobes homolog (Drosophila) Solh  
1439307\_at 1.98945 Cadherin 2 Cdh2  
1439308\_at 1.00447 glutamic-oxaloacetic transaminase 1-like 1 Got111  
1439309\_at 1.17719 RIKEN cDNA 9630044O09 gene 9630044O09Rik  
1439310\_at 1.12778 RIKEN cDNA A630012P03 gene A630012P03Rik  
1439311\_at 1.05679 RIKEN cDNA B830012L14 gene B830012L14Rik  
1439312\_at 0.88038 "Adult male corpora quadrigemina cDNA, RIKEN full-length enriched library, clone:B230337G05 product:unclassifiable, full insert sequence" ---

1439313\_at 1.01254 latrophilin 3 Lphn3  
1439314\_at 1.29300 circadian locomoter output cycles kaput Clock  
1439315\_at 0.98546 Similar to shroom LOC628919  
1439316\_at 2.15019 RNA binding motif protein 39 Rbm39  
1439317\_at 0.98868 "KRIT1, ankyrin repeat containing" Krit1  
1439318\_at 1.05287 microtubule associated serine/threonine kinase family member 4 Mast4  
1439319\_at 1.17780 E74-like factor 1 Elf1  
1439320\_at 1.05756 cDNA sequence BC030477 BC030477  
1439321\_at 1.95027 AT rich interactive domain 1B (Swi1 like) Arid1b  
1439322\_at 0.88029 Protocadherin 9 Pcdh9  
1439323\_a\_at 1.01209 mitogen activated protein kinase kinase kinase 1 /// similar to Mitogen-activated protein kinase kinase kinase 1 (MAPK/ERK kinase kinase 1) (MEK kinase kinase 1) (MEKKK 1) (Hematopoietic progenitor kinase) (HPK) Map4k1 /// LOC672367  
1439324\_at 0.91388 RIKEN cDNA D230004J03 gene /// RIKEN cDNA B430006D22 gene D230004J03Rik /// B430006D22Rik  
1439325\_at 1.55150 Bleomycin hydrolase Blmh  
1439326\_at 1.11739 leucyl/cystinyl aminopeptidase Lnpep  
1439327\_at 0.99447 collagen and calcium binding EGF domains 1 Ccbe1  
1439328\_at 1.90308 nuclear factor of activated T-cells 5 Nfat5  
1439329\_a\_at 0.85087 BR serine/threonine kinase 2 Brsk2  
1439330\_at 2.56516 RIKEN cDNA D230040J21 gene D230040J21Rik  
1439331\_at 1.13925 RIKEN cDNA 4932439E07 gene 4932439E07Rik  
1439332\_at 0.86117 DNA-damage-inducible transcript 4-like Ddit4l  
1439333\_at 0.98296 "potassium channel, subfamily V, member 1" Kcnv1  
1439334\_at 0.86100 Transcribed locus ---  
1439335\_at 1.05066 --- ---  
1439336\_at 0.93313 Transcription factor 4 Tcf4  
1439337\_at 0.97468 target of myb1-like 1 (chicken) Tom111  
1439338\_at 1.01753 hypothetical protein LOC620416 LOC620417  
1439339\_at 0.94213 "3 days neonate thymus cDNA, RIKEN full-length enriched library, clone: A630050C01 product:unclassifiable, full insert sequence" ---  
1439340\_at 1.03958 RIKEN cDNA D630036G22 gene D630036G22Rik  
1439341\_at 1.08553 cDNA sequence AK220484 AK220484  
1439342\_at 1.53257 Caseinolytic peptidase X (E.coli) Clpx  
1439343\_at 0.96689 --- ---  
1439344\_at 1.25844 Transcribed locus ---  
1439345\_at 0.97990 glycoprotein (transmembrane) nmb Gpnmb  
1439346\_at 1.04736 --- ---  
1439347\_at 1.00596 tensin 4 Tns4  
1439348\_at 2.05824 S100 calcium binding protein A10 (calpactin) S100a10  
1439349\_at 1.53606 strawberry notch homolog (Drosophila) Stno  
1439350\_s\_at 0.95173 CDC91 cell division cycle 91-like 1 (S. cerevisiae) Cdc9111  
1439351\_at 0.94886 RIKEN cDNA A930031D07 gene A930031D07Rik

1439352\_at 1.07238 tripartite motif protein 7 Trim7  
1439353\_x\_at 1.10438 transmembrane protein 56 Tmem56  
1439354\_at 1.01798 region containing RIKEN cDNA 2310008H09 gene; RIKEN cDNA  
A230094G09 gene /// region containing RIKEN cDNA 2310008H09 gene; RIKEN cDNA A230094G09  
gene LOC668373 /// LOC670145  
1439355\_at 0.93232 "Pleckstrin homology domain containing, family A member 5" Plekha5  
1439356\_at 1.14239 flightless I homolog (Drosophila) Fliih  
1439357\_at 0.97711 interleukin 17 receptor E Il17re  
1439358\_a\_at 0.95053 neurexin I Nrnx1  
1439359\_x\_at 0.92322 neurexin I Nrnx1  
1439360\_x\_at 0.90419 "DNA segment, Chr 15, ERATO Doi 785, expressed /// similar to kleisin beta  
isoform 2 /// similar to kleisin beta isoform 2" D15Ertd785e /// LOC665187 /// LOC670255  
1439361\_at 1.01544 Myosin IXa Myo9a  
1439362\_at 1.01747 "Adult male urinary bladder cDNA, RIKEN full-length enriched library,  
clone:9530098H01 product:unclassifiable, full insert sequence" ---  
1439363\_at 1.31765 RIKEN cDNA 1200014J11 gene 1200014J11Rik  
1439364\_a\_at 0.95480 matrix metalloproteinase 2 Mmp2  
1439365\_at 1.07618 Myelin transcription factor 1 Myt1  
1439366\_at 0.96331 G-rich RNA sequence binding factor 1 Grsf1  
1439367\_x\_at 0.84344 ADP-ribosylation factor 4 Arf4  
1439368\_a\_at 0.81441 "solute carrier family 9 (sodium/hydrogen exchanger), isoform 3 regulator 2"  
Slc9a3r2  
1439369\_x\_at 0.81259 "solute carrier family 9 (sodium/hydrogen exchanger), isoform 3 regulator 2"  
Slc9a3r2  
1439370\_x\_at 1.28272 "splicing factor 3b, subunit 5" Sf3b5  
1439371\_x\_at 0.92904 translocase of inner mitochondrial membrane 44 Timm44  
1439372\_at 0.94094 SMT3 suppressor of mif two 3 homolog 3 (yeast) Sumo3  
1439373\_x\_at 0.90107 wingless-related MMTV integration site 5B Wnt5b  
1439374\_x\_at 1.02447 ribosomal protein S10 /// similar to ribosomal protein S10 /// similar to  
ribosomal protein S10 /// similar to ribosomal protein S10 /// similar to ribosomal protein S10 Rps10 ///  
LOC621772 /// LOC636539 /// LOC666274 /// LOC668457  
1439375\_x\_at 1.16033 "aldolase 1, A isoform /// similar to Fructose-bisphosphate aldolase A (Muscle-  
type aldolase) (Aldolase 1) /// similar to Fructose-bisphosphate aldolase A (Muscle-type aldolase)  
(Aldolase 1)" Aldoa /// LOC667483 /// LOC671023  
1439376\_x\_at 0.93024 --- ---  
1439377\_x\_at 0.98676 cell division cycle 20 homolog (S. cerevisiae) Cdc20  
1439378\_at 0.95551 cDNA sequence BC048671 BC048671  
1439379\_x\_at 0.94790 protamine 1 Prm1  
1439380\_x\_at 1.04911 "GTL2, imprinted maternally expressed untranslated mRNA" Gtl2  
1439381\_x\_at 0.88941 MARVEL (membrane-associating) domain containing 1 Marveld1  
1439382\_x\_at 0.96134 "discoidin domain receptor family, member 1" Ddr1  
1439383\_x\_at 0.95514 "protein phosphatase 2A, regulatory subunit B (PR 53)" Ppp2r4  
1439384\_at 1.04288 "solute carrier family 13 (sodium-dependent dicarboxylate transporter), member

3" Slc13a3  
1439385\_x\_at 1.03442 "Solute carrier family 13 (sodium-dependent dicarboxylate transporter), member 3" Slc13a3  
1439386\_x\_at 0.90739 "methionine adenosyltransferase II, alpha" Mat2a  
1439387\_x\_at 1.00521 RIKEN cDNA 2310061F22 gene 2310061F22Rik  
1439388\_s\_at 1.02064 breast cancer anti-estrogen resistance 1 Bcar1  
1439389\_s\_at 1.05332 myeloid-associated differentiation marker Myadm  
1439390\_at 0.93440 RIKEN cDNA 1300018I17 gene 1300018I17Rik  
1439391\_at 0.85157 RIKEN cDNA 2810002I04 gene 2810002I04Rik  
1439392\_x\_at 1.03627 "protease (prosome, macropain) 26S subunit, ATPase 1 /// hypothetical gene supported by NM\_008947" Psmc1 /// LOC386042  
1439393\_x\_at 0.94386 "protein phosphatase 2A, regulatory subunit B (PR 53)" Ppp2r4  
1439394\_x\_at 0.87031 cell division cycle 20 homolog (S. cerevisiae) Cdc20  
1439395\_at 0.94915 RIKEN cDNA 9630025I21 gene 9630025I21Rik  
1439396\_x\_at 0.77236 glycerol-3-phosphate dehydrogenase 1 (soluble) Gpd1  
1439397\_at 0.89213 formin 1 Fmn1  
1439398\_x\_at 0.87427 nasal embryonic LHRH factor Nelf  
1439399\_a\_at 0.96188 "small nucleolar RNA, C/D box 22" Snord22  
1439400\_x\_at 0.95705 RIKEN cDNA 5430433E21 gene 5430433E21Rik  
1439401\_x\_at 0.97585 "Protein phosphatase 2, regulatory subunit B (B56), epsilon isoform" Ppp2r5e  
1439402\_at 1.04724 --- ---  
1439403\_x\_at 1.00026 ring finger protein 12 Rnf12  
1439404\_x\_at 0.90884 "zinc finger protein, autosomal /// zinc finger protein X-linked" Zfa /// Zfx  
1439405\_x\_at 0.90277 "Beclin 1 (coiled-coil, myosin-like BCL2-interacting protein)" Becn1  
1439406\_x\_at 1.04462 phenylalanine-tRNA synthetase 2 (mitochondrial) Fars2  
1439407\_x\_at 1.06909 transgelin 2 /// similar to transgelin 2 Tagln2 /// LOC672466  
1439408\_a\_at 1.07133 peroxisome proliferator activated receptor binding protein Pparbp  
1439409\_x\_at 1.13686 tyrosinase-related protein 1 Tyrp1  
1439410\_x\_at 0.87546 "DNA segment, Chr 11, ERATO Doi 333, expressed" D11Ertd333e  
1439411\_a\_at 0.93955 exportin 7 Xpo7  
1439412\_at 0.96891 "Cyclic AMP-regulated phosphoprotein, 21" Arpp21  
1439413\_x\_at 1.02016 mortality factor 4 like 2 Morf4l2  
1439414\_x\_at 1.34630 "Sno, strawberry notch homolog 1 (Drosophila)" Sbnol  
1439415\_x\_at 0.93041 similar to 40S ribosomal protein S21 LOC622373  
1439416\_x\_at 1.01334 "tubulin, beta 2c" Tubb2c  
1439417\_at 0.91168 Quiescin Q6 Qscn6  
1439418\_x\_at 0.88892 transmembrane protein 43 Tmem43  
1439419\_at 1.26302 RIKEN cDNA 2310057M21 gene 2310057M21Rik  
1439420\_x\_at 0.93688 gamma-glutamyltransferase-like activity 1 Ggtla1  
1439421\_x\_at 0.97630 chromobox homolog 3 (Drosophila HP1 gamma) /// similar to chromobox homolog 3 Cbx3 /// LOC633016  
1439422\_a\_at 1.17519 C1q domain containing 2 C1qdc2  
1439423\_x\_at 1.05304 cDNA sequence U46068 U46068

1439424\_x\_at 0.94074 HERPUD family member 2 Herpud2  
1439425\_x\_at 1.08778 cDNA sequence BC024814 BC024814  
1439426\_x\_at 1.00781 P lysozyme structural Lzp-s  
1439427\_at 0.83997 claudin 9 Cldn9  
1439428\_x\_at 0.95646 "GDP-mannose 4, 6-dehydratase" Gmds  
1439429\_x\_at 0.83808 deltex 2 homolog (Drosophila) Dtx2  
1439430\_x\_at 1.11091 RIKEN cDNA 4930403C10 gene 4930403C10Rik  
1439431\_x\_at 1.04397 --- ---  
1439432\_x\_at 0.92461 mortality factor 4 like 2 /// similar to Mortality factor 4-like protein 2 (MORF-related gene X protein) (Transcription factor-like protein MRGX) (Sid 393) /// similar to Mortality factor 4-like protein 2 (MORF-related gene X protein) (Transcription factor-like protein MRGX) (Sid 393) Morf4l2 /// LOC433261 /// LOC677515  
1439433\_a\_at 0.88933 "solute carrier family 35 (UDP-galactose transporter), member 2" Slc35a2  
1439434\_x\_at 0.93772 SH2 domain containing 5 Sh2d5  
1439435\_x\_at 1.28160 phosphoglycerate kinase 1 /// phosphoglycerate kinase 1-like /// phosphoglycerate kinase 1 pseudogene /// phosphoglycerate kinase 1-like Pgk1 /// LOC433594 /// LOC665053 /// LOC668435  
1439436\_x\_at 1.00076 inner centromere protein Incenp  
1439437\_x\_at 1.10512 carboxypeptidase E /// similar to carboxypeptidase E Cpe /// LOC677374  
1439438\_a\_at 0.96087 RIKEN cDNA 1110005A23 gene /// similar to cytokine induced protein 29 kDa /// similar to cytokine induced protein 29 kDa 1110005A23Rik /// LOC625193 /// LOC636633  
1439439\_x\_at 0.99776 eukaryotic translation elongation factor 1 delta (guanine nucleotide exchange protein) Eef1d  
1439440\_x\_at 0.97579 protein tyrosine kinase 9-like (A6-related protein) Ptk9l  
1439441\_x\_at 0.91557 large tumor suppressor 2 Lats2  
1439442\_x\_at 1.09549 tyrosyl-tRNA synthetase 2 (mitochondrial) Yars2  
1439443\_x\_at 0.98891 transketolase Tkt  
1439444\_x\_at 1.06724 transmembrane emp24-like trafficking protein 10 (yeast) /// similar to transmembrane trafficking protein Tmed10 /// LOC634748  
1439445\_x\_at 1.04781 ATP citrate lyase Acly  
1439446\_at 1.05868 cDNA sequence BC048507 BC048507  
1439447\_x\_at 1.03696 ribosomal protein L37a /// similar to 60S ribosomal protein L37a Rpl37a /// LOC629949 /// LOC632394 /// LOC632599 /// LOC640991 /// LOC668935 /// LOC668941 /// LOC669803 /// LOC674834  
1439448\_x\_at 0.97775 transmembrane emp24 protein transport domain containing 9 Tmed9  
1439449\_at 0.90628 special AT-rich sequence binding protein 1 Satb1  
1439450\_x\_at 1.21804 RIKEN cDNA A230046K03 gene A230046K03Rik  
1439451\_x\_at 0.90285 G protein-coupled receptor 172B Gpr172b  
1439452\_x\_at 0.89649 aspartyl aminopeptidase Dnpep  
1439453\_x\_at 0.96960 RIKEN cDNA 1500026D16 gene 1500026D16Rik

1439454\_x\_at 0.87773 TM2 domain containing 2 Tm2d2  
1439455\_x\_at 0.95063 "capping protein (actin filament) muscle Z-line, alpha 1" Capza1  
1439456\_x\_at 0.98884 "ATPase, H+ transporting, lysosomal accessory protein 2" Atp6ap2  
1439457\_x\_at 1.02191 autophagy-related 12 (yeast) Atg12  
1439458\_x\_at 1.02759 CEA-related cell adhesion molecule 11 Ceacam11  
1439459\_x\_at 1.23013 ATP citrate lyase Acly  
1439460\_a\_at 0.96936 zinc finger protein 289 Zfp289  
1439461\_x\_at 0.89991 RIKEN cDNA 2410003A14 gene 2410003A14Rik  
1439462\_x\_at 1.01555 transmembrane emp24-like trafficking protein 10 (yeast) /// similar to transmembrane trafficking protein Tmed10 /// LOC634748  
1439463\_x\_at 0.94119 high mobility group box 1 /// similar to High mobility group protein 1 (HMG-1) (High mobility group protein B1) (Amphoterin) (Heparin-binding protein p30) /// similar to High mobility group protein 1 (HMG-1) (High mobility group protein B1) (Amphoterin) (Heparin-binding protein p30) /// similar to High mobility group protein 1 (HMG-1) (High mobility group protein B1) (Amphoterin) (Heparin-binding protein p30) /// similar to High mobility group protein 1 (HMG-1) (High mobility group protein B1) (Amphoterin) (Heparin-binding protein p30) /// similar to High mobility group protein 1 (HMG-1) (High mobility group protein B1) (Amphoterin) (Heparin-binding protein p30) /// similar to High mobility group protein 1 (HMG-1) (High mobility group protein B1) (Amphoterin) (Heparin-binding protein p30) /// similar to High mobility group protein 1 (HMG-1) (High mobility group protein B1) (Amphoterin) (Heparin-binding protein p30) /// similar to High mobility group protein 1 (HMG-1) (High mobility group protein B1) (Amphoterin) (Heparin-binding protein p30) /// similar to High mobility group protein 1 (HMG-1) (High mobility group protein B1) (Amphoterin) (Heparin-binding protein p30) Hmgb1 /// LOC434174 /// LOC545555 /// LOC623634 /// LOC637733 /// LOC640060 /// LOC666836 /// LOC669546 /// LOC669692 /// LOC671507 /// LOC677578  
1439464\_s\_at 1.04857 testis expressed gene 10 Tex10  
1439465\_x\_at 0.83251 RIKEN cDNA 9430057O19 gene 9430057O19Rik  
1439466\_s\_at 1.01034 BUD31 homolog (yeast) Bud31  
1439467\_at 1.15146 Microtubule-associated protein 4 Mtap4  
1439468\_at 1.01340 BTB and CNC homology 2 Bach2  
1439469\_at 0.99550 "Leucine rich repeat containing 8 family, member C" Lrrc8c  
1439470\_at 1.40252 RIKEN cDNA 2410025L10 gene 2410025L10Rik  
1439471\_at 1.09147 RIKEN cDNA 2610305J24 gene 2610305J24Rik  
1439472\_at 0.96196 GCN1 general control of amino-acid synthesis 1-like 1 (yeast) Gcn111  
1439473\_at 1.11763 Pseudouridylate synthase 7 homolog (S. cerevisiae) Pus7  
1439474\_x\_at 0.93593 RIKEN cDNA B230343H07 gene Nell1  
1439475\_at 1.22572 expressed sequence AI929863 AI929863  
1439476\_at 0.84368 desmoglein 2 Dsg2  
1439477\_at 1.64079 "ubiquitin-conjugating enzyme E2B, RAD6 homology (S. cerevisiae)" Ube2b  
1439478\_at 0.80036 acyl-CoA thioesterase 2 Acot2  
1439479\_at 1.03003 lactase Lct

1439480\_at 1.11833 Expressed sequence AU015850 AU015850  
1439481\_at 1.09088 importin 9 Ipo9  
1439482\_at 1.03251 RIKEN cDNA F830021D11 gene F830021D11Rik  
1439483\_at 1.02222 expressed sequence AI506816 AI506816  
1439484\_at 1.05670 RIKEN cDNA 4930431H11 gene 4930431H11Rik  
1439485\_at 0.81223 zinc finger protein 608 /// RIKEN cDNA D430007A19 gene Zfp608 ///  
D430007A19Rik  
1439486\_at 1.00844 "potassium channel, subfamily T, member 1" Kcnt1  
1439487\_at 0.92029 "ligase IV, DNA, ATP-dependent" Lig4  
1439488\_at 0.94230 "7 days embryo whole body cDNA, RIKEN full-length enriched library, clone:  
C430040N23 product:unclassifiable, full insert sequence" ---  
1439489\_at 0.93748 G protein-coupled receptor 120 Gpr120  
1439490\_at 0.77266 "nuclear receptor subfamily 2, group C, member 1" Nr2c1  
1439491\_at 0.94549 leucine rich repeat containing 38 Lrrc38  
1439492\_at 1.23568 RIKEN cDNA C130053K05 gene C130053K05Rik  
1439493\_at 0.91794 RIKEN cDNA D630040G17 gene /// similar to zinc finger protein 64  
(predicted) D630040G17Rik /// LOC622675  
1439494\_at 0.99804 "solute carrier family 5 (sodium/glucose cotransporter), member 9" Slc5a9  
1439495\_at 0.79133 RIKEN cDNA 4933407H18 gene 4933407H18Rik  
1439496\_at 1.08388 RIKEN cDNA 4921524J06 gene 4921524J06Rik  
1439497\_at 1.29687 RIKEN cDNA 4933415E08 gene 4933415E08Rik  
1439498\_at 1.02845 putative neuronal cell adhesion molecule Punc  
1439499\_at 0.95349 expressed sequence AA415398 AA415398  
1439500\_at 1.01459 --- ---  
1439501\_at 1.03035 calcium binding atopy-related autoantigen 1 Cbaral  
1439502\_at 1.02928 RIKEN cDNA 4930573I19 gene 4930573I19Rik  
1439503\_at 1.15475 zinc finger protein 28 Zfp28  
1439504\_s\_at 0.95582 zinc finger protein 28 Zfp28  
1439505\_at 0.89412 chloride intracellular channel 5 Clic5  
1439506\_at 0.78644 "gene model 98, (NCBI)" Gm98  
1439507\_at 0.98159 TRAF type zinc finger domain containing 1 Traf1  
1439508\_at 0.92646 RIKEN cDNA A730055L17 gene A730055L17Rik  
1439509\_at 0.94115 RIKEN cDNA 2900008C10 gene 2900008C10Rik  
1439510\_at 0.98668 shugoshin-like 1 (S. pombe) Sgol1  
1439511\_at 0.80298 Cyclin-dependent kinase 7 (homolog of Xenopus MO15 cdk-activating  
kinase) Cdk7  
1439512\_at 0.93279 RIKEN cDNA 5830444B04 gene 5830444B04Rik  
1439513\_at 1.00432 proline-rich nuclear receptor coactivator 1 Pnrc1  
1439514\_at 0.89018 CDC28 protein kinase 1b Cks1b  
1439515\_at 1.17243 SET domain containing 5 Setd5  
1439516\_at 1.33050 RIKEN cDNA 2610201A13 gene 2610201A13Rik  
1439517\_at 0.87505 "myb-like, SWIRM and MPN domains 1" Mysm1  
1439518\_at 1.01065 multimerin 2 Mmrn2

1439519\_at 1.00938 "solute carrier family 34 (sodium phosphate), member 3" Slc34a3  
1439520\_at 1.86622 --- ---  
1439521\_at 1.03148 "Adult male aorta and vein cDNA, RIKEN full-length enriched library, clone:  
A530001O10 product:unclassifiable, full insert sequence" ---  
1439522\_at 0.90399 --- ---  
1439523\_at 0.98895 RIKEN cDNA D330027G24 gene D330027G24Rik  
1439524\_at 0.93873 "DnaJ (Hsp40) homolog, subfamily B, member 4" Dnajb4  
1439525\_at 0.91086 RIKEN cDNA 1700066D14 gene 1700066D14Rik  
1439526\_at 1.02820 "Adult male cecum cDNA, RIKEN full-length enriched library,  
clone:9130022D06 product:unclassifiable, full insert sequence" ---  
1439527\_at 0.83939 Expressed sequence BB114106 BB114106  
1439528\_at 0.97730 RIKEN cDNA 4833423E24 gene 4833423E24Rik  
1439529\_at 0.91946 RIKEN cDNA A430110N23 gene A430110N23Rik  
1439530\_a\_at 0.98131 similar to NFkB interacting protein 1 LOC669005  
1439531\_at 1.00022 RIKEN cDNA E130311K13 gene E130311K13Rik  
1439532\_s\_at 0.77317 kinesin family member 13A Kif13a  
1439533\_at 1.03818 RIKEN cDNA 1700125D06 gene 1700125D06Rik  
1439534\_at 0.96306 zinc finger protein 248 Zfp248  
1439535\_at 1.12178 --- ---  
1439536\_at 0.89297 Expressed sequence AI846133 AI846133  
1439537\_at 2.67432 --- ---  
1439538\_at 0.95085 RIKEN cDNA 0610011N22 gene 0610011N22Rik  
1439539\_at 1.00534 translocating chain-associating membrane protein 2 Tram2  
1439540\_at 1.03125 membrane-associated ring finger (C3HC4) 2 2-Mar  
1439541\_at 0.83707 RIKEN cDNA 4930414L22 gene 4930414L22Rik  
1439542\_at 0.88856 zinc finger protein 651 Zfp651  
1439543\_at 0.90233 RIKEN cDNA 1110064A23 gene 1110064A23Rik  
1439544\_at 0.91924 "TBC1 domain family, member 5" Tbc1d5  
1439545\_at 1.09546 Nuclear respiratory factor 1 Nrf1  
1439546\_at 0.97668 RIKEN cDNA 4933417O08 gene 4933417O08Rik  
1439547\_at 0.95313 RIKEN cDNA A930007A09 gene A930007A09Rik  
1439548\_at 1.09096 "RAP2B, member of RAS oncogene family" Rap2b  
1439549\_at 1.04596 proline rich Gla (G-carboxyglutamic acid) 3 (transmembrane) Prrg3  
1439550\_at 1.13249 --- ---  
1439551\_at 0.88243 cDNA sequence BC006965 BC006965  
1439552\_at 0.96772 triple functional domain (PTPRF interacting) Trio  
1439553\_s\_at 1.02986 nuclear transport factor 2 /// similar to Nuclear transport factor 2 (NTF-2) ///  
similar to Nuclear transport factor 2 (NTF-2) /// similar to Nuclear transport factor 2 (NTF-2) /// similar  
to Nuclear transport factor 2 (NTF-2) Nutf2 /// LOC621832 /// LOC668830 /// LOC670887 ///  
LOC675580  
1439554\_at 1.10979 sex comb on midleg homolog 1 Scmh1  
1439555\_at 0.94979 rearranged L-myc fusion sequence Rlf  
1439556\_at 0.98961 neural cell adhesion molecule 1 Ncam1



1439557\_s\_at 0.93048 LIM domain binding 2 Ldb2  
1439558\_at 0.93508 zinc finger protein 75 Zfp75  
1439559\_at 0.93194 RIKEN cDNA 1700040D17 gene 1700040D17Rik  
1439560\_x\_at 0.92448 hypothetical gene supported by BC047216 LOC432995  
1439561\_at 0.95131 RIKEN cDNA 2010012O05 gene 2010012O05Rik  
1439562\_at 0.94168 RIKEN cDNA F730047E07 gene F730047E07Rik  
1439563\_at 0.91528 zinc finger protein 3 Zfp3  
1439564\_at 0.94723 RIKEN cDNA 1700090G07 gene 1700090G07Rik  
1439565\_at 0.87159 Expressed sequence AW492303 AW492303  
1439566\_at 0.91304 RIKEN cDNA C030038J10 gene C030038J10Rik  
1439567\_at 0.97365 T-box 3 Tbx3  
1439568\_at 1.06239 gene regulated by estrogen in breast cancer protein Greb1  
1439569\_at 0.82870 G protein-coupled receptor 83 Gpr83  
1439570\_at 1.02301 "gene model 444, (NCBI)" Gm444  
1439571\_at 1.08122 RIKEN cDNA E230008J23 gene E230008J23Rik  
1439572\_at 2.24631 --- ---  
1439573\_at 1.03775 reticulon 4 receptor-like 2 Rtn4rl2  
1439574\_at 0.88490 RIKEN cDNA 2600015P10 gene 2600015P10Rik  
1439575\_at 1.10673 RIKEN cDNA E130009J12 gene E130009J12Rik  
1439576\_at 1.00295 Transcribed locus ---  
1439577\_at 0.76919 --- ---  
1439578\_at 1.00795 U7 snRNP-specific Sm-like protein LSM11 Lsm11  
1439579\_at 0.97505 hypothetical LOC433408 LOC433408  
1439580\_at 0.88827 RIKEN cDNA B930053N05 gene B930053N05Rik  
1439581\_at 0.99227 RIKEN cDNA 6330403L08 gene 6330403L08Rik  
1439582\_at 1.54258 Microtubule-actin crosslinking factor 1 Macf1  
1439583\_x\_at 0.83920 RIKEN cDNA D130029J02 gene D130029J02Rik  
1439584\_at 1.02514 zinc finger protein 526 Zfp526  
1439585\_at 1.04118 midasin homolog (yeast) Mdn1  
1439586\_at 1.42154 hypothetical LOC548102 LOC548102  
1439587\_at 1.06035 LEM domain containing 3 Lemd3  
1439588\_at 0.98029 "solute carrier organic anion transporter family, member 5A1" Slco5a1  
1439589\_at 0.88946 CD53 antigen Cd53  
1439590\_at 0.95863 X Kell blood group precursor related family member 8 homolog Xkr8  
1439591\_at 1.20027 Unc-51 like kinase 2 (C. elegans) Ulk2  
1439592\_at 1.03045 RIKEN cDNA C030010B13 gene C030010B13Rik  
1439593\_s\_at 0.89000 RIKEN cDNA C030010B13 gene C030010B13Rik  
1439594\_at 1.09793 RIKEN cDNA D130062J10 gene D130062J10Rik  
1439595\_at 1.04824 RIKEN cDNA A430107P09 gene A430107P09Rik  
1439596\_at 1.08588 --- ---  
1439597\_at 1.11808 RIKEN cDNA 4932417H02 gene 4932417H02Rik  
1439598\_at 1.25533 Forkhead box O3a Foxo3a  
1439599\_at 0.95862 galactose-3-O-sulfotransferase 2 Gal3st2

1439600\_at 1.09615 CASP8 and FADD-like apoptosis regulator Cflar  
1439601\_at 1.02890 RIKEN cDNA 2700008B19 gene 2700008B19Rik  
1439602\_at 1.03806 "10 days neonate cerebellum cDNA, RIKEN full-length enriched library, clone: B930049N01 product:unclassifiable, full insert sequence" ---  
1439603\_at 1.12343 "Adult male hypothalamus cDNA, RIKEN full-length enriched library, clone: A230032A12 product:unclassifiable, full insert sequence" ---  
1439604\_at 0.97727 "a disintegrin-like and metalloproteinase (reprolysin type) with thrombospondin type 1 motif, 16" Adamts16  
1439605\_at 1.02469 --- ---  
1439606\_at 0.93987 Transcribed locus ---  
1439607\_at 0.90747 --- ---  
1439608\_at 0.81462 Transcribed locus ---  
1439609\_at 1.01071 Transcribed locus ---  
1439610\_at 0.81600 "RAB27b, member RAS oncogene family" Rab27b  
1439611\_at 0.92326 "cholinergic receptor, muscarinic 1, CNS" Chrm1  
1439612\_at 0.90049 "calcium channel, voltage-dependent, N type, alpha 1B subunit" Cacna1b  
1439613\_at 1.01329 soluble adenylyl cyclase Sacy  
1439614\_at 1.08069 5 hydroxytryptamine (serotonin) receptor 4 Htr4  
1439615\_at 1.03114 giant axonal neuropathy Gan  
1439616\_at 1.14529 Transcribed locus ---  
1439617\_s\_at 1.02139 "phosphoenolpyruvate carboxykinase 1, cytosolic" Pck1  
1439618\_at 1.07782 phosphodiesterase 10A Pde10a  
1439619\_at 1.12121 transcription factor 12 Tcf12  
1439620\_at 1.02354 carbonic anhydrase 13 Car13  
1439621\_at 0.86987 "17 days embryo kidney cDNA, RIKEN full-length enriched library, clone: I920178P20 product:unclassifiable, full insert sequence" ---  
1439622\_at 1.24929 Ras association (RalGDS/AF-6) domain family 4 Rassf4  
1439623\_at 1.03795 OTU domain containing 1 Otud1  
1439624\_at 0.62714 "UDP glucuronosyltransferase 2 family, polypeptide B35" Ugt2b35  
1439625\_at 0.98575 Keratin associated protein 5-5 Krtap5-5  
1439626\_at 0.94470 tropomodulin 3 Tmod3  
1439627\_at 0.90001 zinc finger protein of the cerebellum 1 Zic1  
1439628\_x\_at 0.93371 "Rab38, member of RAS oncogene family" Rab38  
1439629\_at 1.01697 neurexin III Nrnx3  
1439630\_x\_at 0.90461 suprabasin Sbsn  
1439631\_at 1.33838 --- ---  
1439632\_at 0.88819 "12 days embryo spinal ganglion cDNA, RIKEN full-length enriched library, clone: D130046A02 product:unclassifiable, full insert sequence" ---  
1439633\_at 1.04103 RIKEN cDNA B230112P13 gene B230112P13Rik  
1439634\_at 0.94545 RIKEN cDNA 4930505D03 gene 4930505D03Rik  
1439635\_at 0.97801 regulator of G-protein signaling 9 Rgs9  
1439636\_at 1.07379 "NACHT, LRR and PYD containing protein 9c" Nalp9c  
1439637\_at 0.88943 kinesin family member 7 Kif7

1439638\_at 3.09105 Erbb2 interacting protein Erbb2ip  
1439639\_at 1.50287 Polyhomeotic-like 2 (Drosophila) Phc2  
1439640\_at 1.01346 "16 days neonate thymus cDNA, RIKEN full-length enriched library, clone:  
A130046K21 product:hypothetical protein, full insert sequence" ---  
1439641\_at 0.96445 hypothetical LOC553090 LOC553090  
1439642\_at 0.90473 RIKEN cDNA 5930403N24 gene 5930403N24Rik  
1439643\_at 2.86074 Activin receptor IIA Acvr2a  
1439644\_at 0.89385 Early B-cell factor 1 Ebf1  
1439645\_at 1.08045 "adrenergic receptor, alpha 2b" Adra2b  
1439646\_at 0.89302 "Adult male pituitary gland cDNA, RIKEN full-length enriched library,  
clone:5330431D23 product:unclassifiable, full insert sequence" ---  
1439647\_at 0.99861 hypothetical LOC545611 LOC545611  
1439648\_at 0.91789 "anillin, actin binding protein (scraps homolog, Drosophila)" Anln  
1439649\_at 0.86800 arginine decarboxylase Adc  
1439650\_at 2.00418 reticulon 4 Rtn4  
1439651\_at 1.04002 LIM domain only 4 Lmo4  
1439652\_at 2.12963 --- ---  
1439653\_at 1.13672 a disintegrin and metallopeptidase domain 6 Adam6  
1439654\_at 1.02483 hypothetical LOC319225 /// hypothetical protein LOC633385  
LOC319225 /// LOC633385  
1439655\_at 1.22106 Ubiquitin-conjugating enzyme E2D 2 Ube2d2  
1439656\_at 1.52367 "Platelet-activating factor acetylhydrolase, isoform 1b, beta1 subunit" Pafah1b1  
1439657\_at 1.12150 hypothetical LOC319980 LOC319980  
1439658\_at 1.00399 leiomodulin 3 (fetal) Lmod3  
1439659\_at 1.01584 Trf (TATA binding protein-related factor)-proximal protein homolog  
(Drosophila) /// ubiquitin specific peptidase 49 Trfp /// Usp49  
1439660\_at 0.87484 human immunodeficiency virus type I enhancer binding protein 3 Hivep3  
1439661\_at 1.04593 "solute carrier family 16 (monocarboxylic acid transporters), member 14"  
Slc16a14  
1439662\_at 1.16154 homer homolog 1 (Drosophila) Homer1  
1439663\_at 1.06429 Patched homolog 1 Ptch1  
1439664\_at 1.43506 WD repeat domain 68 Wdr68  
1439665\_at 0.97781 G protein-coupled receptor 23 Gpr23  
1439666\_at 0.96486 RIKEN cDNA 2010001J22 gene 2010001J22Rik  
1439667\_at 1.02529 --- ---  
1439668\_at 1.02175 "Adult male hypothalamus cDNA, RIKEN full-length enriched library, clone:  
A230035D19 product:hypothetical protein, full insert sequence" ---  
1439669\_at 0.97746 RIKEN cDNA 6430571L13 gene 6430571L13Rik  
1439670\_at 1.13500 RIKEN cDNA B020006M18 gene B020006M18Rik  
1439671\_at 0.76427 RIKEN cDNA 4930466K18 gene 4930466K18Rik  
1439672\_at 1.19330 Synaptojanin 1 Synj1  
1439673\_at 1.73454 RIKEN cDNA E230008O15 gene E230008O15Rik  
1439674\_at 0.91261 "solute carrier family 4 (anion exchanger), member 8" Slc4a8

1439675\_at 1.02234 RIKEN cDNA 4933429D07 gene 4933429D07Rik  
1439676\_at 1.19289 apoptosis antagonizing transcription factor Aatf  
1439677\_at 0.96409 "epilepsy, progressive myoclonic epilepsy, type 2 gene alpha" Epm2a  
1439678\_at 2.54301 Glutaminase Gls  
1439679\_at 1.07733 chaperonin subunit 3 (gamma) Cct3  
1439680\_at 1.00442 "tumor necrosis factor (ligand) superfamily, member 10" Tnfsf10  
1439681\_at 1.03995 "FERM, RhoGEF and pleckstrin domain protein 2" Farp2  
1439682\_at 0.99582 --- ---  
1439683\_at 0.88096 "In vitro fertilized eggs cDNA, RIKEN full-length enriched library,  
clone:7420434E04 product:unclassifiable, full insert sequence" ---  
1439684\_at 0.92762 RIKEN cDNA 4930570G19 gene 4930570G19Rik  
1439685\_at 1.19982 Ring finger protein 11 Rnf11  
1439686\_at 1.09335 Muscleblind-like 1 (Drosophila) Mbnl1  
1439687\_at 2.06667 "RAB14, member RAS oncogene family" Rab14  
1439688\_at 1.04472 fibulin 1 Fbln1  
1439689\_at 0.96655 RIKEN cDNA 9030224M15 gene 9030224M15Rik  
1439690\_at 1.08014 RIKEN cDNA 5133401N09 gene 5133401N09Rik  
1439691\_at 1.77355 "DNA segment, Chr 5, ERATO Doi 579, expressed" D5Ert579e  
1439692\_at 1.03274 "16 days neonate cerebellum cDNA, RIKEN full-length enriched library,  
clone:9630042A05 product:unclassifiable, full insert sequence" ---  
1439693\_a\_at 0.94982 F-box and WD-40 domain protein 16 Fbxw16  
1439694\_at 1.16766 F-box and WD-40 domain protein 16 Fbxw16  
1439695\_a\_at 1.16016 M-phase phosphoprotein 1 Mphosph1  
1439696\_at 1.10197 "nuclear receptor subfamily 2, group C, member 2" Nr2c2  
1439697\_at 1.05068 interleukin 1 receptor accessory protein Il1rap  
1439698\_at 0.94194 Zinc finger protein (C2H2 type) 276 Zfp276  
1439699\_at 1.05464 Progesterone receptor Pgr  
1439700\_at 0.99992 A disintegrin and metallopeptidase domain 1b Adam1b  
1439701\_at 1.09901 RIKEN cDNA 9330121K16 gene 9330121K16Rik  
1439702\_at 0.92898 --- ---  
1439703\_at 1.03368 CD200 receptor 1 Cd200r1  
1439704\_at 1.24160 histone deacetylase 2 Hdac2  
1439705\_at 1.40209 "Protein tyrosine phosphatase, non-receptor type 12" Ptpn12  
1439706\_at 1.05446 RIKEN cDNA A330106F07 gene A330106F07Rik  
1439707\_at 0.90520 RIKEN cDNA C230034O21 gene C230034O21Rik  
1439708\_at 1.09864 "myomesin family, member 3" Myom3  
1439709\_at 0.99853 --- ---  
1439710\_at 1.00141 nuclear receptor coactivator 6 interacting protein Ncoa6ip  
1439711\_at 1.07873 --- ---  
1439712\_at 1.26685 integrator complex subunit 10 Ints10  
1439713\_at 0.96395 integrin alpha 1 Itga1  
1439714\_at 0.91668 --- ---  
1439715\_at 1.15470 O-sialoglycoprotein endopeptidase-like 1 Osgepl1

|              |                                                                                                                                              |                         |  |
|--------------|----------------------------------------------------------------------------------------------------------------------------------------------|-------------------------|--|
| 1439716_at   | 0.96367 piwi-like homolog 4 (Drosophila)                                                                                                     | Piwil4                  |  |
| 1439717_at   | 0.97020 RIKEN cDNA B230362M20 gene                                                                                                           | B230362M20Rik           |  |
| 1439718_at   | 0.93312 "Protein kinase inhibitor, gamma"                                                                                                    | Pkig                    |  |
| 1439719_at   | 0.97197 RIKEN cDNA E430004N04 gene                                                                                                           | E430004N04Rik           |  |
| 1439720_at   | 1.05032 Ral GEF with PH domain and SH3 binding motif 1                                                                                       | Ralgps1                 |  |
| 1439721_at   | 0.86170 expressed sequence C85627                                                                                                            | C85627                  |  |
| 1439722_at   | 1.40771 --- ---                                                                                                                              |                         |  |
| 1439723_at   | 0.95568 RIKEN cDNA 5730590G19 gene                                                                                                           | 5730590G19Rik           |  |
| 1439724_at   | 0.92815 resistance to inhibitors of cholinesterase 8 homolog B (C. elegans)                                                                  | Ric8b                   |  |
| 1439725_at   | 1.04699 "protein tyrosine phosphatase, receptor type, T"                                                                                     | Ptptrt                  |  |
| 1439726_at   | 1.25037 RIKEN cDNA 4432406C05 gene                                                                                                           | 4432406C05Rik           |  |
| 1439727_at   | 0.99738 chloride channel calcium activated 6 /// expressed sequence AI747448                                                                 |                         |  |
|              | Clca6 /// AI747448                                                                                                                           |                         |  |
| 1439728_at   | 0.92319 RIKEN cDNA D330027H18 gene                                                                                                           | D330027H18Rik           |  |
| 1439729_at   | 0.98531 RIKEN cDNA A930038B10 gene                                                                                                           | A930038B10Rik           |  |
| 1439730_at   | 0.95060 Neurocalcin delta                                                                                                                    | Ncald                   |  |
| 1439731_at   | 0.93274 RIKEN cDNA E130309F12 gene                                                                                                           | E130309F12Rik           |  |
| 1439732_at   | 0.96286 "16 days neonate cerebellum cDNA, RIKEN full-length enriched library, clone:9630041I08 product:unclassifiable, full insert sequence" | ---                     |  |
| 1439733_at   | 0.98128 "13 days embryo stomach cDNA, RIKEN full-length enriched library, clone: D530023N09 product:unclassifiable, full insert sequence"    | ---                     |  |
| 1439734_at   | 0.73580 Matrix metalloproteinase 15                                                                                                          | Mmp15                   |  |
| 1439735_at   | 0.92092 "Adult male testis cDNA, RIKEN full-length enriched library, clone:4933414F24 product:unclassifiable, full insert sequence"          | ---                     |  |
| 1439736_at   | 0.94571 RIKEN cDNA 5830453J16 gene                                                                                                           | 5830453J16Rik           |  |
| 1439737_x_at | 0.99965 "Mediator of RNA polymerase II transcription, subunit 6 homolog (yeast)"                                                             | Med6                    |  |
| 1439738_at   | 0.99203 --- ---                                                                                                                              |                         |  |
| 1439739_at   | 0.99877 RIKEN cDNA 1700112C13 gene /// testes-specific protease 50                                                                           | 1700112C13Rik /// Tsp50 |  |
| 1439740_s_at | 1.06116 uridine-cytidine kinase 2                                                                                                            | Uck2                    |  |
| 1439741_x_at | 1.01775 uridine-cytidine kinase 2                                                                                                            | Uck2                    |  |
| 1439742_at   | 0.88732 Signal transducing adaptor molecule (SH3 domain and ITAM motif) 2                                                                    | Stam2                   |  |
| 1439743_at   | 0.96276 expressed sequence AW048948                                                                                                          | AW048948                |  |
| 1439744_at   | 0.81154 C-src tyrosine kinase                                                                                                                | Csk                     |  |
| 1439745_at   | 0.90047 "calcium channel, voltage-dependent, gamma subunit 7"                                                                                | Cacng7                  |  |
| 1439746_at   | 1.00289 dual specificity phosphatase 27 (putative)                                                                                           | Dusp27                  |  |
| 1439747_at   | 0.94309 prostaglandin E synthase                                                                                                             | Ptges                   |  |
| 1439748_at   | 0.97421 dipeptidylpeptidase 6                                                                                                                | Dpp6                    |  |
| 1439749_at   | 1.04745 zeta-chain (TCR) associated protein kinase                                                                                           | Zap70                   |  |
| 1439750_at   | 0.95899 Transcribed locus                                                                                                                    | ---                     |  |
| 1439751_at   | 1.03427 zinc finger protein 708                                                                                                              | Zfp708                  |  |
| 1439752_at   | 0.97793 "PREDICTED: Mus musculus similar to O-acyltransferase (membrane bound)                                                               |                         |  |

domain containing 1 (LOC234155), mRNA" ---

1439753\_x\_at 1.07829 sine oculis-related homeobox 4 homolog (Drosophila) Six4  
 1439754\_at 0.91373 SRY-box containing gene 12 Sox12  
 1439755\_at 0.84379 --- ---  
 1439756\_at 0.86501 RIKEN cDNA 4933406J04 gene 4933406J04Rik  
 1439757\_s\_at 1.01271 Eph receptor A4 Epha4  
 1439758\_at 0.97362 "amyotrophic lateral sclerosis 2 (juvenile) chromosome region, candidate 12 (human)" Als2cr12  
 1439759\_x\_at 0.98972 RIKEN cDNA 2410078J06 gene 2410078J06Rik  
 1439760\_x\_at 0.87493 uroplakin 1B Upk1b  
 1439761\_x\_at 0.96204 RIKEN cDNA D830026I12 gene D830026I12Rik  
 1439762\_x\_at 0.97093 "adrenergic receptor, alpha 2c" Adra2c  
 1439763\_at 0.88603 "DnaJ (Hsp40) homolog, subfamily C, member 11" Dnajc11  
 1439764\_s\_at 1.23973 insulin-like growth factor 2 mRNA binding protein 2 Igf2bp2  
 1439765\_x\_at 1.00134 keratin 42 Krt42  
 1439766\_x\_at 0.76335 vascular endothelial growth factor C Vegfc  
 1439767\_at 0.96796 "discs, large (Drosophila) homolog-associated protein 2" Dlgap2  
 1439768\_x\_at 0.85288 "sema domain, immunoglobulin domain (Ig), TM domain, and short cytoplasmic domain" Sema4f  
 1439769\_at 1.02994 Zinc finger protein 644 Zfp644  
 1439770\_at 0.86182 RIKEN cDNA 6430598A04 gene 6430598A04Rik  
 1439771\_s\_at 1.01435 "DNA segment, Chr 13, ERATO Doi 608, expressed" D13Ertd608e  
 1439772\_at 1.10554 "DNA segment, Chr 1, Brigham & Women's Genetics 0212 expressed" D1Bwg0212e  
 1439773\_at 0.94159 "lymphocyte antigen 6 complex, locus E" Ly6e  
 1439774\_at 1.10020 paired related homeobox 1 Prrx1  
 1439775\_at 0.88511 bromodomain and WD repeat domain containing 3 Brwd3  
 1439776\_at 0.99749 2-oxoglutarate and iron-dependent oxygenase domain containing 1 Ogfod1  
 1439777\_at 0.89091 hypothetical protein B230218O03 B230218O03  
 1439778\_at 1.03074 Cdk5 and Abl enzyme substrate 1 Cables1  
 1439779\_at 0.97398 "16 days neonate cerebellum cDNA, RIKEN full-length enriched library, clone:9630050J22 product:unclassifiable, full insert sequence" ---  
 1439780\_at 1.01365 ribosomal protein L7-like 1 Rpl7l1  
 1439781\_at 0.98365 RIKEN cDNA D930048N14 gene D930048N14Rik  
 1439782\_s\_at 1.08841 RIKEN cDNA D930048N14 gene D930048N14Rik  
 1439783\_at 0.84306 RIKEN cDNA C330018D20 gene C330018D20Rik  
 1439784\_at 0.87036 RIKEN cDNA 2310046O06 gene 2310046O06Rik  
 1439785\_at 0.99072 RIKEN cDNA 9630013A20 gene 9630013A20Rik  
 1439786\_at 1.05650 growth factor receptor bound protein 2-associated protein 2 Gab2  
 1439787\_at 0.95967 "purinergic receptor P2X, ligand-gated ion channel, 7" P2rx7  
 1439788\_at 0.68701 coiled-coil domain containing 111 Ccdc111  
 1439789\_at 1.02310 --- ---  
 1439790\_at 1.07424 "serine (or cysteine) peptidase inhibitor, clade B, member 9" Serpinb9

1439791\_at 0.92176 "gene model 527, (NCBI)" Gm527  
 1439792\_at 1.01518 "Transcribed locus, strongly similar to XP\_579813.1 PREDICTED:  
 hypothetical protein XP\_579813 [Rattus norvegicus]" ---  
 1439793\_at 1.08020 gap junction membrane channel protein alpha 3 Gja3  
 1439794\_at 0.76498 --- ---  
 1439795\_at 1.04161 G protein-coupled receptor 64 Gpr64  
 1439796\_at 1.02294 expressed sequence AI747448 AI747448  
 1439797\_at 1.09236 peroxisome proliferator activator receptor delta Ppard  
 1439798\_at 0.95424 homeo box C10 Hoxc10  
 1439799\_at 0.82052 Transcribed locus ---  
 1439800\_at 2.22805 restin (Reed-Steinberg cell-expressed intermediate filament-associated protein)  
 Rsn  
 1439801\_at 0.94509 Sad1 and UNC84 domain containing 1 Sunc1  
 1439802\_at 0.92956 serine/threonine kinase 35 Stk35  
 1439803\_at 0.94240 RIKEN cDNA 6430526N21 gene 6430526N21Rik  
 1439804\_at 0.91950 RIKEN cDNA 2310015A10 gene 2310015A10Rik  
 1439805\_at 2.08641 Nuclear factor of activated T-cells 5 Nfat5  
 1439806\_at 1.08829 "Transcriptional adaptor 1 (HFI1 homolog, yeast) like" Tada11  
 1439807\_at 1.02312 transmembrane protein 74 Tmem74  
 1439808\_at 1.03561 RIKEN cDNA A130090K04 gene A130090K04Rik  
 1439809\_at 1.00876 preferentially expressed antigen in melanoma like 7 Pramel7  
 1439810\_s\_at 1.00256 preferentially expressed antigen in melanoma like 7 Pramel7  
 1439811\_at 1.09237 5-methyltetrahydrofolate-homocysteine methyltransferase Mtr  
 1439812\_at 1.10614 RIKEN cDNA 4930402H24 gene 4930402H24Rik  
 1439813\_at 1.53851 Signal peptide peptidase 3 Sppl3  
 1439814\_at 0.94295 "ATPase, class I, type 8B, member 4" Atp8b4  
 1439815\_at 0.95442 "RIKEN cDNA A230048G03 gene /// similar to CG2747-PB, isoform B"  
 A230048G03Rik /// LOC670614  
 1439816\_at 0.95703 Hypothetical gene supported by AK087915 LOC433270  
 1439817\_at 1.17320 RIKEN cDNA 2900064A13 gene 2900064A13Rik  
 1439818\_at 1.00970 expressed sequence AI931714 AI931714  
 1439819\_at 0.96002 expressed sequence AU015263 AU015263  
 1439820\_at 1.06616 Early B-cell factor 1 Ebf1  
 1439821\_at 0.95016 Lrp2 binding protein Lrp2bp  
 1439822\_at 1.04254 --- ---  
 1439823\_at 1.28844 C-terminal binding protein 2 Ctbp2  
 1439824\_at 0.93904 choroideremia Chm  
 1439825\_at 1.19356 deltex 3-like (Drosophila) Dtx3l  
 1439826\_at 1.26065 heat shock protein 14 Hspa14  
 1439827\_at 0.75609 "a disintegrin-like and metallopeptidase (reprolysin type) with thrombospondin  
 type 1 motif, 12" Adamts12  
 1439828\_at 1.13346 MAP kinase-activated protein kinase 5 Mapkapk5  
 1439829\_at 1.06599 Adenylate cyclase 5 Adcy5

1439830\_at 0.79012 similar to mitogen activated protein kinase kinase kinase 5 LOC675366  
1439831\_at 1.08975 Hypothetical LOC240327 LOC240327  
1439832\_at 1.70974 Wiskott-Aldrich syndrome-like (human) Wasl  
1439833\_at 0.92608 septin 3 3-Sep  
1439834\_at 1.14751 RIKEN cDNA 2400009B08 gene 2400009B08Rik  
1439835\_x\_at 1.04215 "ATP-binding cassette, sub-family D (ALD), member 2" Abcd2  
1439836\_at 1.00511 ankyrin repeat and SOCS box-containing protein 15 Asb15  
1439837\_at 0.75508 trinucleotide repeat containing 15 Tnrc15  
1439838\_a\_at 1.01934 transmembrane inner ear Tmie  
1439839\_at 1.79666 RIKEN cDNA D130051D11 gene D130051D11Rik  
1439840\_at 1.19656 RIKEN cDNA A430088C08 gene A430088C08Rik  
1439841\_at 0.93172 "zinc finger, FYVE domain containing 27" Zfyve27  
1439842\_at 1.10541 Zinc finger protein 287 Zfp287  
1439843\_at 0.96516 calcium/calmodulin-dependent protein kinase IV Camk4  
1439844\_at 0.94754 RIKEN cDNA 8430426J06 gene 8430426J06Rik  
1439845\_at 1.12087 Transcribed locus ---  
1439846\_at 0.95047 Kruppel-like factor 12 Klf12  
1439847\_s\_at 0.99388 Kruppel-like factor 12 Klf12  
1439848\_at 1.04044 blood vessel epicardial substance Bves  
1439849\_at 1.00215 "Mus musculus, clone IMAGE:4222153, mRNA" ---  
1439850\_at 1.00653 cDNA sequence BC066028 BC066028  
1439851\_at 1.00737 Transcribed locus ---  
1439852\_at 0.92509 --- ---  
1439853\_at 0.92272 "beta-1,4-N-acetyl-galactosaminyl transferase 2" B4galnt2  
1439854\_at 0.86109 "harakiri, BCL2 interacting protein (contains only BH3 domain)" Hrk  
1439855\_at 0.98309 cDNA sequence BC023818 BC023818  
1439856\_at 0.89651 activin receptor IIB Acvr2b  
1439857\_at 1.69167 Ubiquitin specific peptidase 32 Usp32  
1439858\_at 0.84105 "12 days embryo spinal ganglion cDNA, RIKEN full-length enriched library, clone:D130031D15 product:unclassifiable, full insert sequence" ---  
1439859\_at 1.02680 RIKEN cDNA 9630033F20 gene 9630033F20Rik  
1439860\_at 0.97806 eukaryotic elongation factor-2 kinase Eef2k  
1439861\_at 0.98189 zinc finger protein 583 Zfp583  
1439862\_at 0.77326 "Visual cortex cDNA, RIKEN full-length enriched library, clone:K530032J01 product:unclassifiable, full insert sequence" ---  
1439863\_at 1.12108 UDP-glucose ceramide glucosyltransferase Ugcg  
1439864\_at 0.89980 coiled-coil domain containing 40 Ccdc40  
1439865\_at 1.09516 kelch repeat and BTB (POZ) domain containing 7 Kbtbd7  
1439866\_at 0.87183 p53-associated parkin-like cytoplasmic protein Parc  
1439867\_at 0.85953 U box domain containing 5 Ubox5  
1439868\_at 0.94520 "Adult male spinal cord cDNA, RIKEN full-length enriched library, clone:A330108B13 product:unclassifiable, full insert sequence" ---  
1439869\_at 0.92098 RIKEN cDNA 2900054J07 gene 2900054J07Rik



|            |         |                                                                                                                                            |               |
|------------|---------|--------------------------------------------------------------------------------------------------------------------------------------------|---------------|
| 1439870_at | 1.01382 | RIKEN cDNA A330008L17 gene                                                                                                                 | A330008L17Rik |
| 1439871_at | 1.74729 | Lemur tyrosine kinase 2 Lmtk2                                                                                                              |               |
| 1439872_at | 0.93502 | Transcribed locus                                                                                                                          | ---           |
| 1439873_at | 1.06054 | "diacylglycerol kinase, delta" Dgkd                                                                                                        |               |
| 1439874_at | 0.98591 | RIKEN cDNA 9330102E08 gene                                                                                                                 | 9330102E08Rik |
| 1439875_at | 0.88771 | zinc finger protein 128 Zfp128                                                                                                             |               |
| 1439876_at | 1.02406 | vesicle transport through interaction with t-SNAREs homolog 1A (yeast) Vti1a                                                               |               |
| 1439877_at | 3.21269 | Exostoses (multiple) 1 Ext1                                                                                                                |               |
| 1439878_at | 0.98131 | involucrin Iv1                                                                                                                             |               |
| 1439879_at | 1.16960 | Zinc finger protein 568 Zfp568                                                                                                             |               |
| 1439880_at | 0.84684 | RIKEN cDNA D630023F18 gene                                                                                                                 | D630023F18Rik |
| 1439881_at | 1.21897 | RIKEN cDNA C030013E06 gene                                                                                                                 | C030013E06Rik |
| 1439882_at | 0.91618 | Sec23 interacting protein Sec23ip                                                                                                          |               |
| 1439883_at | 1.02983 | Nuclear receptor coactivator 1 Ncoa1                                                                                                       |               |
| 1439884_at | 0.96150 | nudix (nucleoside diphosphate linked moiety X)-type motif 16 Nudt16                                                                        |               |
| 1439885_at | 1.05295 | homeo box C5 Hoxc5                                                                                                                         |               |
| 1439886_at | 0.88653 | RIKEN cDNA 4632415L05 gene                                                                                                                 | 4632415L05Rik |
| 1439887_at | 1.19193 | "16 days embryo head cDNA, RIKEN full-length enriched library, clone: C130025B04 product:unclassifiable, full insert sequence"             | ---           |
| 1439888_at | 1.10320 | "Mammary gland RCB-0527 Jyg-MC(B) cDNA, RIKEN full-length enriched library, clone:G930041P03 product:unclassifiable, full insert sequence" | ---           |
| 1439889_at | 0.85822 | "sodium channel, voltage-gated, type VIII, alpha"                                                                                          | Scn8a         |
| 1439890_at | 0.91989 | F-box and leucine-rich repeat protein 7 Fbx17                                                                                              |               |
| 1439891_at | 0.99882 | Zinc finger protein 703 Zfp703                                                                                                             |               |
| 1439892_at | 0.99102 | BR serine/threonine kinase 1 Brsk1                                                                                                         |               |
| 1439893_at | 1.01413 | CDNA clone IMAGE:3471071                                                                                                                   | ---           |
| 1439894_at | 1.01809 | RIKEN cDNA A730056I06 gene                                                                                                                 | A730056I06Rik |
| 1439895_at | 1.90541 | expressed sequence AU021025                                                                                                                | AU021025      |
| 1439896_at | 1.03744 | LIM motif-containing protein kinase 2 Limk2                                                                                                |               |
| 1439897_at | 0.91233 | Nebulette Nebl                                                                                                                             |               |
| 1439898_at | 0.96924 | EBNA1 binding protein 2 Ebna1bp2                                                                                                           |               |
| 1439899_at | 0.98337 | UDP-N-acetyl-alpha-D-galactosamine:polypeptide N-acetylgalactosaminyltransferase 13 Galnt13                                                |               |
| 1439900_at | 1.09011 | Thiamine triphosphatase Thtpa                                                                                                              |               |
| 1439901_at | 1.19366 | RIKEN cDNA 2610208M17 gene                                                                                                                 | 2610208M17Rik |
| 1439902_at | 1.01426 | complement component 5a receptor 1 C5ar1                                                                                                   |               |
| 1439903_at | 0.92716 | cDNA sequence BC028663                                                                                                                     | BC028663      |
| 1439904_at | 0.96790 | follistatin-like 5 Fstl5                                                                                                                   |               |
| 1439905_at | 0.99835 | RIKEN cDNA A330062J17 gene                                                                                                                 | A330062J17Rik |
| 1439906_at | 0.92003 | "0 day neonate eyeball cDNA, RIKEN full-length enriched library, clone: E130004J04 product:unclassifiable, full insert sequence"           | ---           |
| 1439907_at | 0.91089 | Radixin Rdx                                                                                                                                |               |
| 1439908_at | 0.84291 | zinc finger with KRAB and SCAN domains 1                                                                                                   | Zkscan1       |

1439909\_at 1.14461 zinc finger protein 521 Zfp521  
1439910\_a\_at 0.79376 --- ---  
1439911\_at 1.08865 "Adult male urinary bladder cDNA, RIKEN full-length enriched library, clone:9530055O04 product:unclassifiable, full insert sequence" ---  
1439912\_at 1.18402 RIKEN cDNA 9430098F02 gene 9430098F02Rik  
1439913\_at 0.92315 RIKEN cDNA 1810053B01 gene 1810053B01Rik  
1439914\_at 1.21437 RIKEN cDNA 4932416H05 gene 4932416H05Rik  
1439915\_at 1.30276 Myeloid ecotropic viral integration site-related gene 1 Mrg1  
1439916\_at 0.93490 hypothetical protein LOC545182 LOC545182  
1439917\_at 1.94002 PDZ domain containing 8 Pdzd8  
1439918\_at 1.10071 outer dense fiber of sperm tails 2 Odf2  
1439919\_at 0.87576 Transcribed locus ---  
1439920\_at 1.81061 Transcribed locus ---  
1439921\_at 0.96258 --- ---  
1439922\_at 1.11713 RIKEN cDNA 1190002C06 gene 1190002C06Rik  
1439923\_at 1.01048 "tubulin, gamma complex associated protein 5" Tubgcp5  
1439924\_x\_at 1.05605 "tubulin, gamma complex associated protein 5" Tubgcp5  
1439925\_at 0.81313 transmembrane 4 superfamily member 1 Tm4sf1  
1439926\_at 1.08113 RIKEN cDNA 4632417D23 gene 4632417D23Rik  
1439927\_at 1.18726 Paralemmin Palm  
1439928\_at 1.13009 Spectrin beta 2 Spnb2  
1439929\_at 1.47690 Malignant fibrous histiocytoma amplified sequence 1 Mfhas1  
1439930\_at 1.01545 "SWI/SNF related, matrix associated, actin dependent regulator of chromatin, subfamily a, member 2" Smarca2  
1439931\_at 1.61861 glycogen synthase kinase 3 beta Gsk3b  
1439932\_at 1.06463 RIKEN cDNA 3110003A22 gene 3110003A22Rik  
1439933\_at 1.60963 RIKEN cDNA B430316J06 gene B430316J06Rik  
1439934\_at 0.98314 "solute carrier family 30, member 10" Slc30a10  
1439935\_at 0.94928 transmembrane protein 122 Tmem122  
1439936\_at 0.96354 --- ---  
1439937\_at 1.17587 --- ---  
1439938\_at 1.28534 serine/threonine kinase 38 Stk38  
1439939\_at 0.90328 RIKEN cDNA E030042N06 gene E030042N06Rik  
1439940\_at 1.20741 RIKEN cDNA 2900019G14 gene 2900019G14Rik  
1439941\_at 0.89223 --- ---  
1439942\_at 1.14594 prolyl endopeptidase Prep  
1439943\_at 1.10133 vacuolar protein sorting 54 (yeast) Vps54  
1439944\_at 0.97700 --- ---  
1439945\_at 0.88241 zinc finger protein 449 Zfp449  
1439946\_at 0.86724 Myocyte enhancer factor 2C Mef2c  
1439947\_at 1.00780 "cytochrome P450, family 11, subfamily a, polypeptide 1" Cyp11a1  
1439948\_at 1.31383 cDNA sequence BC046401 BC046401  
1439949\_at 2.40634 Glycogen synthase kinase 3 beta Gsk3b

1439950\_at 1.15956 dynein cytoplasmic 1 heavy chain 1 Dync1h1  
1439951\_at 1.01671 --- ---  
1439952\_at 1.54704 RIKEN cDNA 3110082M05 gene 3110082M05Rik  
1439953\_at 0.99873 phosphomannomutase 2 Pmm2  
1439954\_at 0.94547 RIKEN cDNA 6430514M23 gene 6430514M23Rik  
1439955\_at 0.85782 RAD9 homolog B (S. cerevisiae) Rad9b  
1439956\_at 1.12376 "membrane-spanning 4-domains, subfamily A, member 6B" Ms4a6b  
1439957\_at 0.99165 expressed sequence AI843190 AI843190  
1439958\_at 1.01324 similar to transcription elongation factor B polypeptide 3 binding protein 1 isoform 1 /// similar to transcription elongation factor B polypeptide 3 binding protein 1 isoform 1 LOC546257 /// LOC619649  
1439959\_at 1.01171 fibroblast growth factor 11 Fgf11  
1439960\_at 1.01675 RNA pseudouridylate synthase domain containing 2 Rpsud2  
1439961\_x\_at 0.94507 Transcribed locus ---  
1439962\_at 0.92096 RIKEN cDNA 2310010J17 gene 2310010J17Rik  
1439963\_x\_at 0.91576 RIKEN cDNA 1700129I04 gene 1700129I04Rik  
1439964\_at 0.90801 "DNA segment, Chr 8, Brigham & Women's Genetics 1414 expressed" D8Bwg1414e  
1439965\_at 1.13634 Transcribed locus ---  
1439966\_x\_at 0.91647 sideroflexin 2 Sfxn2  
1439967\_at 1.02162 RIKEN cDNA 1700071A11 gene 1700071A11Rik  
1439968\_x\_at 0.91319 "Adult male corpora quadrigemina cDNA, RIKEN full-length enriched library, clone:B230215D24 product:unclassifiable, full insert sequence" ---  
1439969\_at 0.86266 RIKEN cDNA 4930500O05 gene 4930500O05Rik  
1439970\_at 2.01654 WNK lysine deficient protein kinase 1 Wnk1  
1439971\_at 0.90564 RIKEN cDNA 6330439K17 gene 6330439K17Rik  
1439972\_at 1.34463 ethanolamine kinase 1 Etnk1  
1439973\_at 0.95459 Crx opposite strand transcript 1 Crxos1  
1439974\_at 1.09151 RIKEN cDNA C430014M02 gene C430014M02Rik  
1439975\_at 0.93491 cDNA sequence BC062109 BC062109  
1439976\_at 1.08399 "asparagine-linked glycosylation 11 homolog (yeast, alpha-1,2-mannosyltransferase)" Alg11  
1439977\_at 0.90186 hypothetical protein 4930515I15 4930515I15  
1439978\_at 0.99141 RIKEN cDNA D030022P06 gene D030022P06Rik  
1439979\_at 0.95708 zinc finger protein 398 Zfp398  
1439980\_at 2.18163 "DNA segment, Chr 14, ERATO Doi 725, expressed" D14Ertd725e  
1439981\_at 0.93780 RIKEN cDNA A430001F24 gene A430001F24Rik  
1439982\_at 0.90074 "Adult male liver tumor cDNA, RIKEN full-length enriched library, clone: C730006I10 product:unclassifiable, full insert sequence" ---  
1439983\_a\_at 0.91218 amiloride-sensitive cation channel 3 Accn3  
1439984\_at 0.95525 phosphatidylserine synthase 2 Ptdss2  
1439985\_at 1.05452 "ATP-binding cassette, sub-family C (CFTR/MRP), member 12" Abcc12  
1439986\_at 0.96859 "diacylglycerol kinase, iota" Dgki

1439987\_at 0.99819 "glutamate receptor, ionotropic, kainate 1" Grik1  
1439988\_at 1.11508 --- ---  
1439989\_at 2.03452 tuberous sclerosis 1 Tsc1  
1439990\_at 1.03403 "12 days embryo spinal ganglion cDNA, RIKEN full-length enriched library, clone:D130065P14 product:unclassifiable, full insert sequence" ---  
1439991\_a\_at 1.05608 poly(A)binding protein nuclear-like 1 Pabpn1  
1439992\_at 1.05376 RIKEN cDNA 2610206G21 gene 2610206G21Rik  
1439993\_at 1.11823 Arginine/serine-rich coiled-coil 1 Rsrc1  
1439994\_at 0.70014 "Adult male corpora quadrigemina cDNA, RIKEN full-length enriched library, clone:B230306E21 product:unclassifiable, full insert sequence" ---  
1439995\_at 1.08301 expressed sequence C80638 C80638  
1439996\_at 1.00113 TatD DNase domain containing 1 Tatdn1  
1439997\_at 0.86792 synaptojanin 1 Synj1  
1439998\_at 1.86542 jumonji domain containing 1C Jmjd1c  
1439999\_at 1.53362 --- ---  
1440000\_at 0.99060 RIKEN cDNA E330013P04 gene E330013P04Rik  
1440001\_at 0.97554 RNA imprinted and accumulated in nucleus Rian  
1440002\_at 1.24599 RNA (guanine-7-) methyltransferase Rnmt  
1440003\_at 0.91262 Transcribed locus ---  
1440004\_at 1.07113 Suppressor of fused homolog (Drosophila) Sufu  
1440005\_at 1.09259 hypothetical protein C730009D12 C730009D12  
1440006\_at 1.01475 cDNA sequence BC026600 BC026600  
1440007\_at 1.07458 "solute carrier family 43, member 1" Slc43a1  
1440008\_at 0.99799 RIKEN cDNA 2310043L19 gene 2310043L19Rik  
1440009\_at 1.08733 olfactory receptor 78 Olfr78  
1440010\_at 1.16478 RIKEN cDNA C230066K19 gene C230066K19Rik  
1440011\_at 2.55834 Exostoses (multiple) 1 Ext1  
1440012\_at 1.29897 --- ---  
1440013\_at 2.16964 Tripartite motif-containing 44 Trim44  
1440014\_at 1.46349 Phosphofurin acidic cluster sorting protein 1 Pacs1  
1440015\_at 0.88393 Transcribed locus ---  
1440016\_at 1.06820 Dihydrolipoamide branched chain transacylase E2 Dbt  
1440017\_at 0.96270 "pleckstrin homology domain containing, family G (with RhoGef domain) member 3" Plekhg3  
1440018\_at 0.90986 RIKEN cDNA A330043J11 gene A330043J11Rik  
1440019\_at 1.07611 G protein-coupled receptor 22 Gpr22  
1440020\_at 2.26044 Rearranged L-myc fusion sequence Rlf  
1440021\_at 1.00614 G protein-coupled receptor 20 Gpr20  
1440022\_at 1.77622 "polymerase (DNA-directed), delta interacting protein 3" Poldip3  
1440023\_at 1.01890 protocadherin 12 Pcdh12  
1440024\_at 0.81793 "inositol 1,4,5-trisphosphate 3-kinase C" Itpkc  
1440025\_at 1.20221 kaptin Kptn  
1440026\_at 1.54447 Trichorhinophalangeal syndrome I (human) Trps1

1440027\_at 0.97180 "10 days neonate cerebellum cDNA, RIKEN full-length enriched library, clone: B930082K12 product:unclassifiable, full insert sequence" ---

1440028\_at 2.10734 Autophagy-related 7 (yeast) Atg7

1440029\_at 1.04935 "ST8 alpha-N-acetyl-neuraminide alpha-2,8-sialyltransferase 3" St8sia3

1440030\_at 1.08321 --- ---

1440031\_at 1.04069 dact 3 Dact3

1440032\_at 0.95097 RIKEN cDNA E130008O17 gene E130008O17Rik

1440033\_at 1.09603 Phosphoprotein associated with glycosphingolipid microdomains 1 Pag1

1440034\_at 1.17277 signal transducing adaptor molecule (SH3 domain and ITAM motif) 2 Stam2

1440035\_at 1.11671 --- ---

1440036\_x\_at 0.99967 "similar to poly(A) binding protein, cytoplasmic 4 isoform 1" LOC230010

1440037\_at 3.11741 pre B-cell leukemia transcription factor 1 Pbx1

1440038\_at 1.06237 RIKEN cDNA B430007K19 gene B430007K19Rik

1440039\_at 1.13415 Bromodomain and WD repeat domain containing 3 Brwd3

1440040\_at 3.01534 Cyclin-dependent kinase 6 Cdk6

1440041\_at 1.06233 "Transforming growth factor, beta receptor III" Tgfbr3

1440042\_at 1.09643 "ankyrin 2, brain" Ank2

1440043\_at 0.97828 "ankyrin 2, brain" Ank2

1440044\_at 0.93967 Transcription termination factor 1 Ttf1

1440045\_at 1.22443 "Crystallin, zeta (quinone reductase)-like 1" Cryz11

1440046\_at 1.10576 cDNA sequence BC031748 BC031748

1440047\_at 0.97715 suppressor of cytokine signaling 1 Socs1

1440048\_at 1.39403 "SWI/SNF related, matrix associated, actin dependent regulator of chromatin, subfamily a, member 5" Smarca5

1440049\_at 0.93313 Ribosomal protein 10 Rpl10

1440050\_at 0.97117 Hbs1-like (S. cerevisiae) Hbs11

1440051\_at 1.40984 "Protein phosphatase 3, catalytic subunit, alpha isoform" Ppp3ca

1440052\_at 2.76216 Ephrin A5 Efna5

1440053\_at 1.06395 Collagen and calcium binding EGF domains 1 Ccbe1

1440054\_at 1.06487 "phosphatidylinositol 3-kinase, catalytic, alpha polypeptide" Pik3ca

1440055\_at 1.04380 Expressed sequence AI848100 AI848100

1440056\_at 1.00733 "Adult male hippocampus cDNA, RIKEN full-length enriched library, clone: C630001C05 product:unclassifiable, full insert sequence" ---

1440057\_at 1.03041 hydroxysteroid (17-beta) dehydrogenase 7 Hsd17b7

1440058\_at 1.04841 "solute carrier family 22 (organic cation transporter), member 14" Slc22a14

1440059\_at 1.19071 Mitogen-activated protein kinase kinase kinase 5 Map4k5

1440060\_at 1.04917 hypothetical LOC331480 LOC331480

1440061\_at 1.34370 ring-box 1 Rbx1

1440062\_at 0.97623 RIKEN cDNA 2510009E07 gene 2510009E07Rik

1440063\_at 1.02512 "phenylalanine-tRNA synthetase-like, alpha subunit" Farsla

1440064\_at 0.98170 cDNA sequence BC026657 BC026657

1440065\_at 1.18427 Polymerase (RNA) II (DNA directed) polypeptide J Polr2j

1440066\_at 1.39101 "SWI/SNF-related, matrix-associated actin-dependent regulator of chromatin,

subfamily a, containing DEAD/H box 1`" Smarcd1

1440067\_at 1.03453 Neural cell adhesion molecule 1 Ncam1

1440068\_at 1.16612 Regulatory factor X domain containing 2 homolog (human) Rfxdc2

1440069\_at 1.08675 Ephrin B2 Efnb2

1440070\_at 0.83018 choline acetyltransferase Chat

1440071\_at 1.00408 "membrane associated guanylate kinase, WW and PDZ domain containing 1" Magi1

1440072\_at 0.84987 RIKEN cDNA E430022K19 gene E430022K19Rik

1440073\_at 1.26631 ribonucleotide reductase M1 Rrm1

1440074\_at 0.94946 hypothetical gene supported by AK082832 LOC432988

1440075\_at 1.08776 Transcribed locus ---

1440076\_at 1.42070 Sequestosome 1 Sqstm1

1440077\_at 1.06130 RIKEN cDNA 6330549D23 gene 6330549D23Rik

1440078\_at 2.48942 Bromodomain containing 4 Brd4

1440079\_at 1.00108 RIKEN cDNA 3632454L22 gene 3632454L22Rik

1440080\_at 0.95824 Serine/arginine-rich protein specific kinase 2 Srpk2

1440081\_at 1.44764 RIKEN cDNA 4631422C13 gene 4631422C13Rik

1440082\_at 1.80372 PTK2 protein tyrosine kinase 2 Ptk2

1440083\_at 2.15093 RIKEN cDNA A430061O12 gene A430061O12Rik

1440084\_at 0.86489 Expressed sequence AI663975 AI663975

1440085\_at 0.87971 ectodysplasin A2 isoform receptor Eda2r

1440086\_at 0.82726 ring finger protein 182 Rnf182

1440087\_at 1.04077 --- ---

1440088\_at 1.04205 Transcribed locus ---

1440089\_at 0.99023 cAMP responsive element binding protein 5 Creb5

1440090\_at 1.14674 "Solute carrier family 25, member 27" Slc25a27

1440091\_at 1.56568 myeloid ecotropic viral integration site-related gene 1 Mrg1

1440092\_at 4.42931 Exostoses (multiple) 1 Ext1

1440093\_at 0.91555 endothelin receptor type A Ednra

1440094\_at 0.94367 cDNA sequence BC030870 BC030870

1440095\_at 1.72215 --- ---

1440096\_at 1.00619 "extracellular matrix protein 2, female organ and adipocyte specific" Ecm2

1440097\_at 1.13938 miRNA containing gene Mirg

1440098\_at 1.13390 RIKEN cDNA D030018L15 gene D030018L15Rik

1440099\_at 0.95533 "0 day neonate cerebellum cDNA, RIKEN full-length enriched library, clone: C230026N07 product:unclassifiable, full insert sequence" ---

1440100\_at 0.82461 RIKEN cDNA 4930527D15 gene 4930527D15Rik

1440101\_at 1.10950 --- ---

1440102\_at 0.95393 "solute carrier family 36 (proton/amino acid symporter), member 3" Slc36a3

1440103\_at 0.94763 Transcribed locus ---

1440104\_at 1.71037 RAN binding protein 2 Ranbp2

1440105\_at 0.95381 jumonji domain containing 2D Jmjd2d

1440106\_at 0.96645 Transcription factor 4 Tcf4

1440107\_at 1.09828 "Smg-7 homolog, nonsense mediated mRNA decay factor (C. elegans)"  
Smg7

1440108\_at 0.56310 forkhead box P2 Foxp2

1440109\_at 0.97121 "DNA segment, Chr 7, ERATO Doi 413, expressed" D7Ertd413e

1440110\_at 1.17686 RIKEN cDNA B130019D13 gene B130019D13Rik

1440111\_at 1.45660 Formin-like 2 Fmnl2

1440112\_at 0.92819 leucine rich repeat transmembrane neuronal 3 Lrrtm3

1440113\_at 0.99923 metastasis associated 1 Mta1

1440114\_x\_at 0.94739 ankyrin repeat domain 47 Ankrd47

1440115\_at 0.94463 Olfactomedin 1 Olfm1

1440116\_at 0.88663 RIKEN cDNA D630045J12 gene D630045J12Rik

1440117\_at 1.00384 leucine rich repeat containing 48 Lrrc48

1440118\_at 0.94265 "DNA segment, Chr 11, ERATO Doi 333, expressed" D11Ertd333e

1440119\_at 1.13305 signal-induced proliferation-associated 1 like 1 Sipal11

1440120\_at 1.53785 "Guanine nucleotide binding protein (G protein), beta polypeptide 2 like 1"  
Gnb211

1440121\_at 0.86679 "ST6 (alpha-N-acetyl-neuraminyl-2,3-beta-galactosyl-1,3)-N-  
acetylgalactosaminide alpha-2,6-sialyltransferase 3" St6galnac3

1440122\_at 0.90601 hypothetical protein LOC666504 /// hypothetical protein LOC672638 ///  
hypothetical protein LOC675536 LOC666504 /// LOC672638 /// LOC675536

1440123\_at 1.59540 --- ---

1440124\_at 1.03277 RIKEN cDNA B230334C09 gene B230334C09Rik

1440125\_at 0.88553 RIKEN cDNA A530054K11 gene A530054K11Rik

1440126\_at 1.11536 cDNA sequence BC037704 BC037704

1440127\_a\_at 1.06835 Transcribed locus ---

1440128\_s\_at 0.88649 seizure related 6 homolog like Sez6l

1440129\_at 0.99661 Aurora kinase A Aurka

1440130\_at 0.92458 expressed sequence BB116930 BB116930

1440131\_at 0.92145 Poliovirus receptor-related 1 Pvr1l

1440132\_s\_at 0.96305 "protein kinase, cAMP dependent regulatory, type I beta" Prkar1b

1440133\_x\_at 0.85107 "protein kinase, cAMP dependent regulatory, type I beta" Prkar1b

1440134\_at 1.06006 "cytochrome P450, family 4, subfamily a, polypeptide 10 /// cDNA sequence  
BC013476" Cyp4a10 /// BC013476

1440135\_at 1.13692 "Amyloid beta (A4) precursor protein-binding, family B, member 2" Apbb2

1440136\_at 0.77104 Zinc finger protein 509 Zfp509

1440137\_at 0.84418 B-cell leukemia/lymphoma 11B Bcl11b

1440138\_at 0.99740 "AT hook, DNA binding motif, containing 1" Ahdc1

1440139\_at 1.04793 "Neural precursor cell expressed, developmentally down-regulated gene 4-  
like" Nedd4l

1440140\_at 1.03862 Nuclear factor I/C Nfic

1440141\_at 0.89490 "potassium voltage-gated channel, subfamily Q, member 2" Kcnq2

1440142\_s\_at 1.01964 glial fibrillary acidic protein Gfap

1440143\_at 1.00406 "phosphatidylinositol glycan anchor biosynthesis, class Z" Pigz

1440144\_x\_at 1.09331 hypothetical protein C330046E03 C330046E03  
 1440145\_at 1.01803 Histocompatibility 60 H60  
 1440146\_at 0.88418 vacuolar protein sorting 13A (yeast) Vps13a  
 1440147\_at 1.01218 "leucine-rich repeat LGI family, member 2" Lgi2  
 1440148\_at 1.03657 G protein-coupled receptor 6 Gpr6  
 1440149\_at 0.93886 PAN3 polyA specific ribonuclease subunit homolog (S. cerevisiae) Pan3  
 1440150\_at 1.02587 "Transglutaminase 3, E polypeptide" Tgm3  
 1440151\_s\_at 0.96133 endothelial differentiation-related factor 1 Edf1  
 1440152\_x\_at 0.96070 endothelial differentiation-related factor 1 /// similar to Endothelial differentiation-related factor 1 (EDF-1) (Multiprotein bridging factor 1) (MBF1) (Calmodulin-associated peptide 19) (CAP-19) /// similar to Endothelial differentiation-related factor 1 (EDF-1) (Multiprotein bridging factor 1) (MBF1) (Calmodulin-associated peptide 19) (CAP-19) /// similar to Endothelial differentiation-related factor 1 (EDF-1) (Multiprotein bridging factor 1) (MBF1) (Calmodulin-associated peptide 19) (CAP-19) Edf1 /// LOC665181 /// LOC671865 /// LOC674653  
 1440153\_at 0.95419 "Adult male brain cDNA, RIKEN full-length enriched library, clone:3526403L10 product:unclassifiable, full insert sequence" ---  
 1440154\_at 0.94196 Pre B-cell leukemia transcription factor 3 Pbx3  
 1440155\_at 1.01566 follistatin-like 4 Fstl4  
 1440156\_s\_at 0.99528 expressed sequence AI851523 AI851523  
 1440157\_at 0.91610 Sex comb on midleg-like 4 (Drosophila) Scml4  
 1440158\_x\_at 1.13338 Coiled-coil-helix-coiled-coil-helix domain containing 7 Chchd7  
 1440159\_at 0.86362 RIKEN cDNA 1700010B09 gene 1700010B09Rik  
 1440160\_x\_at 1.00696 RIKEN cDNA 2010321M09 gene 2010321M09Rik  
 1440161\_at 0.95025 Matrix metalloproteinase 16 Mmp16  
 1440162\_x\_at 0.88980 hypothetical protein A630043P06 A630043P06  
 1440163\_at 1.91820 RIKEN cDNA 6030490B17 gene 6030490B17Rik  
 1440164\_x\_at 0.87809 "CD8 antigen, alpha chain" Cd8a  
 1440165\_at 1.06719 "Protein tyrosine phosphatase, receptor type, C" Ptpcr  
 1440166\_x\_at 0.98931 5-hydroxytryptamine (serotonin) receptor 1D Htr1d  
 1440167\_s\_at 1.01078 LIM domain containing preferred translocation partner in lipoma Lpp  
 1440168\_x\_at 0.96656 potassium channel tetramerisation domain containing 7 Kctd7  
 1440169\_x\_at 0.98565 interferon (alpha and beta) receptor 2 Ifnar2  
 1440170\_at 0.98425 ankyrin repeat domain 10 Ankrd10  
 1440171\_x\_at 1.10492 RIKEN cDNA 1700049G17 gene 1700049G17Rik  
 1440172\_s\_at 0.92188 RIKEN cDNA 1700113H08 gene 1700113H08Rik  
 1440173\_x\_at 1.06328 "selectin, platelet" Selp  
 1440174\_at 0.96689 RIKEN cDNA E130307A14 gene E130307A14Rik  
 1440175\_at 1.05312 Epsin 2 Epn2  
 1440176\_x\_at 0.90158 RIKEN cDNA 1700003F12 gene 1700003F12Rik  
 1440177\_at 1.03319 hypothetical protein 9630027E11 9.63E+17  
 1440178\_x\_at 0.91681 zeta-chain (TCR) associated protein kinase Zap70  
 1440179\_x\_at 1.05994 IBR domain containing 1 Ibrdc1  
 1440180\_x\_at 1.01743 zinc finger and BTB domain containing 3 Zbtb3



|              |         |                                                                                              |               |
|--------------|---------|----------------------------------------------------------------------------------------------|---------------|
| 1440181_at   | 1.01176 | "gene model 1568, (NCBI)"                                                                    | Gm1568        |
| 1440182_at   | 1.01475 | frizzled homolog 10 (Drosophila)                                                             | Fzd10         |
| 1440183_x_at | 1.11881 | Coenzyme Q9 homolog (yeast)                                                                  | Coq9          |
| 1440184_at   | 1.04103 | RIKEN cDNA 2610005L07 gene                                                                   | 2610005L07Rik |
| 1440185_x_at | 1.05427 | Ubiquitin-like 1 (sentrin) activating enzyme E1A                                             | Uble1a        |
| 1440186_s_at | 0.90612 | RIKEN cDNA 2310020A21 gene                                                                   | 2310020A21Rik |
| 1440187_at   | 0.78275 | "TAF3 RNA polymerase II, TATA box binding protein (TBP)-associated factor" Taf3              |               |
| 1440188_at   | 1.05354 | ---                                                                                          | ---           |
| 1440189_at   | 0.93144 | "protein phosphatase 2, regulatory subunit B (B56), alpha isoform"                           | Ppp2r5a       |
| 1440190_at   | 0.92812 | leukocyte receptor cluster (LRC) member 9                                                    | Leng9         |
| 1440191_s_at | 1.04217 | leukocyte receptor cluster (LRC) member 9                                                    | Leng9         |
| 1440192_at   | 1.03918 | RIKEN cDNA 1810054D07 gene                                                                   | 1810054D07Rik |
| 1440193_at   | 0.99148 | ankyrin repeat domain 12                                                                     | Ankrd12       |
| 1440194_at   | 0.87050 | RIKEN cDNA 2210011C24 gene                                                                   | 2210011C24Rik |
| 1440195_at   | 0.77990 | Serpine1 mRNA binding protein 1                                                              | Serbp1        |
| 1440196_at   | 1.02180 | ---                                                                                          | ---           |
| 1440197_at   | 0.91769 | cDNA sequence BC032203                                                                       | BC032203      |
| 1440198_at   | 1.13774 | Enhancer of polycomb homolog 1 (Drosophila)                                                  | Epc1          |
| 1440199_at   | 0.88728 | expressed sequence AU042651                                                                  | AU042651      |
| 1440200_at   | 0.84436 | RIKEN cDNA 9630031F12 gene                                                                   | 9630031F12Rik |
| 1440201_at   | 1.09984 | mitogen activated protein kinase 10                                                          | Mapk10        |
| 1440202_at   | 0.81637 | similar to gonadotropin inducible ovarian transcription factor 2                             | LOC622175     |
| 1440203_at   | 1.00067 | Polycomb group ring finger 3                                                                 | Pcgf3         |
| 1440204_at   | 0.99908 | RIKEN cDNA 3110039M20 gene                                                                   | 3110039M20Rik |
| 1440205_at   | 1.20590 | ---                                                                                          | ---           |
| 1440206_at   | 1.06097 | RIKEN cDNA A930024E05 gene                                                                   | A930024E05Rik |
| 1440207_at   | 1.35519 | "Nacylglycerol-3-phosphate O-acyltransferase 7 (lysophosphatidic acid acyltransferase, eta)" | Agpat7        |
| 1440208_at   | 0.98860 | RAS-related C3 botulinum substrate 2                                                         | Rac2          |
| 1440209_at   | 1.05111 | membrane-associated ring finger (C3HC4) 1                                                    | 1-Mar         |
| 1440210_at   | 0.95614 | "calcium channel, voltage-dependent, gamma subunit 2"                                        | Cacng2        |
| 1440211_at   | 1.00694 | "cytochrome P450, family 2, subfamily j, polypeptide 11"                                     | Cyp2j11       |
| 1440212_at   | 1.02618 | ---                                                                                          | ---           |
| 1440213_a_at | 0.89983 | RIKEN cDNA 2010001M06 gene                                                                   | 2010001M06Rik |
| 1440214_at   | 0.97929 | RIKEN cDNA A630001G21 gene                                                                   | A630001G21Rik |
| 1440215_at   | 0.72580 | hypothetical protein C130086A10                                                              | C130086A10    |
| 1440216_at   | 0.96840 | interferon induced transmembrane protein 5                                                   | Ifitm5        |
| 1440217_at   | 1.00511 | similar to hypothetical protein FLJ39743                                                     | LOC434197     |
| 1440218_at   | 0.99823 | cDNA sequence BC040758                                                                       | BC040758      |
| 1440219_at   | 1.68394 | Centrosome and spindle pole associated protein 1                                             | Cspp1         |
| 1440220_at   | 0.96169 | expressed sequence AI503564                                                                  | AI503564      |
| 1440221_at   | 0.94908 | expressed sequence AA408650                                                                  | AA408650      |

|              |         |                                                                                                                |                         |  |
|--------------|---------|----------------------------------------------------------------------------------------------------------------|-------------------------|--|
| 1440222_at   | 1.03408 | ---                                                                                                            | ---                     |  |
| 1440223_at   | 2.04038 | RNA binding motif protein 6                                                                                    | Rbm6                    |  |
| 1440224_at   | 1.03526 | RIKEN cDNA 9330133O14 gene                                                                                     | 9330133O14Rik           |  |
| 1440225_at   | 1.04127 | G protein-coupled receptor 116                                                                                 | Gpr116                  |  |
| 1440226_at   | 0.91959 | zinc finger protein 760                                                                                        | Zfp760                  |  |
| 1440227_at   | 1.14173 | expressed sequence BF642829                                                                                    | BF642829                |  |
| 1440228_at   | 0.81496 | RAN binding protein 6                                                                                          | Ranbp6                  |  |
| 1440229_at   | 0.93139 | RIKEN cDNA 2310034G01 gene                                                                                     | 2310034G01Rik           |  |
| 1440230_at   | 1.06399 | leucine rich repeat containing 54                                                                              | Lrrc54                  |  |
| 1440231_at   | 0.99372 | microtubule-associated protein 9                                                                               | Mtap9                   |  |
| 1440232_at   | 0.95014 | similar to KIAA1913 /// similar to KIAA1913                                                                    | LOC622645 /// LOC674857 |  |
| 1440233_at   | 0.94068 | RIKEN cDNA A930013B10 gene                                                                                     | A930013B10Rik           |  |
| 1440234_at   | 0.90280 | RIKEN cDNA 1810012P15 gene                                                                                     | 1810012P15Rik           |  |
| 1440235_at   | 0.85853 | "integrin, alpha 10"                                                                                           | Itga10                  |  |
| 1440236_at   | 1.10297 | RIKEN cDNA A830039H05 gene                                                                                     | A830039H05Rik           |  |
| 1440237_at   | 0.75229 | "excision repair cross-complementing rodent repair deficiency, complementation group 4"                        | Ercc4                   |  |
| 1440238_at   | 0.94526 | glioma tumor suppressor candidate region gene 1                                                                | Gltscr1                 |  |
| 1440239_at   | 0.91522 | RIKEN cDNA 2310066E14 gene                                                                                     | 2310066E14Rik           |  |
| 1440240_at   | 1.02893 | neuropeptide B                                                                                                 | Npb                     |  |
| 1440241_at   | 1.14341 | "Transient receptor potential cation channel, subfamily M, member 1"                                           | Trpm1                   |  |
| 1440242_at   | 1.15145 | RIKEN cDNA C030014K22 gene                                                                                     | C030014K22Rik           |  |
| 1440243_at   | 1.07896 | copine VII                                                                                                     | Cpne7                   |  |
| 1440244_at   | 1.07476 | avian erythroblastosis virus E-26 (v-ets) oncogene related                                                     | Erg                     |  |
| 1440245_at   | 0.88850 | coiled-coil domain containing 88                                                                               | Ccdc88                  |  |
| 1440246_at   | 1.04055 | longevity assurance homolog 6 ( <i>S. cerevisiae</i> )                                                         | Lass6                   |  |
| 1440247_at   | 1.20146 | PHD finger protein 14                                                                                          | Phf14                   |  |
| 1440248_at   | 0.93794 | cancer susceptibility candidate 4                                                                              | Casc4                   |  |
| 1440249_at   | 0.98146 | RIKEN cDNA 4921525H12 gene                                                                                     | 4921525H12Rik           |  |
| 1440250_at   | 0.50592 | "procollagen, type IV, alpha 4"                                                                                | Col4a4                  |  |
| 1440251_s_at | 1.03135 | zinc finger protein 64                                                                                         | Zfp64                   |  |
| 1440252_at   | 0.94287 | "H2A histone family, member J"                                                                                 | H2afj                   |  |
| 1440253_at   | 1.06549 | ---                                                                                                            | ---                     |  |
| 1440254_at   | 1.00545 | "Transcribed locus, weakly similar to XP_417295.1 PREDICTED: similar to TAF3 protein [ <i>Gallus gallus</i> ]" | ---                     |  |
| 1440255_at   | 1.07831 | MBD2-interacting zinc finger                                                                                   | Mizf                    |  |
| 1440256_at   | 0.91791 | regulator of G-protein signalling 9 binding protein                                                            | Rgs9bp                  |  |
| 1440257_at   | 0.86263 | oocyte specific homeobox 6                                                                                     | Obox6                   |  |
| 1440258_at   | 1.02299 | "Potassium voltage-gated channel, subfamily Q, member 2"                                                       | Kcnq2                   |  |
| 1440259_at   | 1.50403 | "Mannosidase, alpha, class 1A, member 2"                                                                       | Man1a2                  |  |
| 1440260_at   | 2.87528 | RIKEN cDNA A930007B11 gene                                                                                     | A930007B11Rik           |  |
| 1440261_at   | 1.10311 | "adaptor-related protein complex AP-4, epsilon 1"                                                              | Ap4e1                   |  |
| 1440262_at   | 0.85839 | ---                                                                                                            | ---                     |  |

|            |         |                                                                                                                                              |                            |
|------------|---------|----------------------------------------------------------------------------------------------------------------------------------------------|----------------------------|
| 1440263_at | 1.53053 | neural regeneration protein                                                                                                                  | Nrp                        |
| 1440264_at | 0.91689 | ---                                                                                                                                          | ---                        |
| 1440265_at | 0.94326 | Jun proto-oncogene related gene d1                                                                                                           | Jund1                      |
| 1440266_at | 1.02037 | RIKEN cDNA 5830428M24 gene                                                                                                                   | 5830428M24Rik              |
| 1440267_at | 1.13271 | peroxisome biogenesis factor 1                                                                                                               | Pex1                       |
| 1440268_at | 1.81218 | tripartite motif-containing 41                                                                                                               | Trim41                     |
| 1440269_at | 0.96654 | SCY1-like 2 ( <i>S. cerevisiae</i> )                                                                                                         | Scyl2                      |
| 1440270_at | 0.94422 | fibroblast growth factor 12                                                                                                                  | Fgf12                      |
| 1440271_at | 1.00545 | Transcribed locus                                                                                                                            | ---                        |
| 1440272_at | 0.93363 | "Eukaryotic translation initiation factor 2, subunit 1 alpha"                                                                                | Eif2s1                     |
| 1440273_at | 0.95039 | "10 days neonate cerebellum cDNA, RIKEN full-length enriched library, clone: B930073D03 product: hypothetical protein, full insert sequence" | ---                        |
| 1440274_at | 1.04303 | Rap guanine nucleotide exchange factor (GEF) 4                                                                                               | Rapgef4                    |
| 1440275_at | 0.94060 | runt related transcription factor 3                                                                                                          | Runx3                      |
| 1440276_at | 0.94500 | "gene model 62, (NCBI)"                                                                                                                      | Gm62                       |
| 1440277_at | 2.09901 | expressed sequence AU041474                                                                                                                  | AU041474                   |
| 1440278_at | 0.84969 | ---                                                                                                                                          | ---                        |
| 1440279_at | 0.96700 | ---                                                                                                                                          | ---                        |
| 1440280_at | 0.95397 | coiled-coil domain containing 45                                                                                                             | Ccdc45                     |
| 1440281_at | 1.20342 | RIKEN cDNA 0610042C05 gene                                                                                                                   | 0610042C05Rik              |
| 1440282_at | 0.85557 | tubby like protein 4 /// RIKEN cDNA 2210038L17 gene                                                                                          | Tulp4 ///<br>2210038L17Rik |
| 1440283_at | 1.18582 | RIKEN cDNA 1810059H22 gene                                                                                                                   | 1810059H22Rik              |
| 1440284_at | 0.99295 | "Transcribed locus, weakly similar to XP_576460.1 PREDICTED: similar to hypothetical protein PB402898.00.0 [ <i>Rattus norvegicus</i> ]"     | ---                        |
| 1440285_at | 0.99178 | "protein phosphatase 1, regulatory (inhibitor) subunit 9A"                                                                                   | Ppp1r9a                    |
| 1440286_at | 0.99823 | F-box and leucine-rich repeat protein 16                                                                                                     | Fbxl16                     |
| 1440287_at | 3.30812 | RIKEN cDNA 1110014D18 gene                                                                                                                   | 1110014D18Rik              |
| 1440288_at | 1.10640 | patched domain containing 2                                                                                                                  | Ptchd2                     |
| 1440289_at | 0.95822 | "GA repeat binding protein, beta 2"                                                                                                          | Gabpb2                     |
| 1440290_at | 0.93458 | hypothetical gene supported by AK039686 LOC434089                                                                                            |                            |
| 1440291_at | 1.12160 | Transcribed locus                                                                                                                            | ---                        |
| 1440292_at | 1.49177 | "DNA segment, Chr 13, ERATO Doi 666, expressed"                                                                                              | D13Ertd666e                |
| 1440293_at | 0.94028 | RIKEN cDNA C230081A13 gene                                                                                                                   | C230081A13Rik              |
| 1440294_at | 1.38194 | SET domain containing 2                                                                                                                      | Setd2                      |
| 1440295_at | 1.56762 | RIKEN cDNA 1110057K04 gene                                                                                                                   | 1110057K04Rik              |
| 1440296_at | 1.09270 | hypothetical protein LOC666250 /// hypothetical protein LOC669419                                                                            | LOC666250 /// LOC669419    |
| 1440297_at | 1.01278 | RIKEN cDNA 4931406I20 gene                                                                                                                   | 4931406I20Rik              |
| 1440298_at | 0.90521 | triggering receptor expressed on myeloid cells-like 2                                                                                        | Trem12                     |
| 1440299_at | 1.09725 | RIKEN cDNA E330016A19 gene                                                                                                                   | E330016A19Rik              |
| 1440300_at | 0.99073 | Transcribed locus                                                                                                                            | ---                        |
| 1440301_at | 1.11174 | ---                                                                                                                                          | ---                        |

1440302\_at 0.98031 "solute carrier family 25 (mitochondrial carrier, phosphate carrier), member 3" Slc25a3

1440303\_at 1.07996 "Solute carrier family 7, member 6 opposite strand" Slc7a6os

1440304\_at 1.39634 BTB and CNC homology 2 Bach2

1440305\_at 1.12920 --- ---

1440306\_at 1.01117 "Nuclear receptor subfamily 3, group C, member 2" Nr3c2

1440307\_at 1.62882 "general transcription factor IIIC, polypeptide 2, beta" Gtf3c2

1440308\_at 1.06639 cytidylate kinase Cmpk

1440309\_at 1.04117 RIKEN cDNA 4833430A08 gene 4833430A08Rik

1440310\_at 0.98607 "Runt-related transcription factor 1; translocated to, 1 (cyclin D-related)" Runx1t1

1440311\_at 1.14467 sorbin and SH3 domain containing 1 Sorbs1

1440312\_at 0.90528 "ELOVL family member 7, elongation of long chain fatty acids (yeast)" Elovl7

1440313\_at 0.99419 "fucosidase, alpha-L- 2, plasma" Fuca2

1440314\_at 1.72932 Thyroid hormone receptor interactor 12 Trip12

1440315\_at 1.01623 muscleblind-like 1 (Drosophila) Mbnl1

1440316\_at 1.09007 RIKEN cDNA 6430526N21 gene 6430526N21Rik

1440317\_at 2.64126 RIKEN cDNA C130068B02 gene C130068B02Rik

1440318\_at 0.83972 WD repeat domain 35 Wdr35

1440319\_at 0.92258 "gene model 817, (NCBI)" Gm817

1440320\_at 1.19843 --- ---

1440321\_at 0.95554 Microtubule associated serine/threonine kinase 2 Mast2

1440322\_at 1.06895 "CUG triplet repeat, RNA binding protein 2" Cugbp2

1440323\_at 1.08277 synaptotagmin II Syt2

1440324\_at 0.85631 mitochondrial ribosomal protein L19 Mrpl19

1440325\_at 0.98026 "Adult male medulla oblongata cDNA, RIKEN full-length enriched library, clone:6330531L09 product:unclassifiable, full insert sequence" ---

1440326\_at 0.96917 Src family associated phosphoprotein 1 Scap1

1440327\_at 1.00903 expressed sequence AI195470 AI195470

1440328\_at 1.15198 nuclear autoantigenic sperm protein (histone-binding) Nasp

1440329\_s\_at 1.00866 G patch domain containing 2 Gpatc2

1440330\_at 0.97971 "Histone 1, H1e" Hist1h1e

1440331\_at 0.98663 RIKEN cDNA 9430079B08 gene 9430079B08Rik

1440332\_at 1.38285 carnitine deficiency-associated gene expressed in ventricle 3 Cdv3

1440333\_at 1.01276 MAM domain containing 4 Mamdc4

1440334\_at 1.33673 Zinc finger protein 90 Zfp90

1440335\_at 0.95314 --- ---

1440336\_at 0.99584 protein arginine N-methyltransferase 6 Prmt6

1440337\_at 1.08578 Transcribed locus ---

1440338\_at 1.03077 RIKEN cDNA E430028B21 gene E430028B21Rik

1440339\_at 0.61613 RIKEN cDNA 4833416E15 gene 4833416E15Rik

1440340\_at 0.92580 "UDP-Gal:betaGal beta 1,3-galactosyltransferase, polypeptide 6" B3galt6

1440341\_at 1.32105 similar to SMF protein LOC629345

1440342\_at 1.04716 RIKEN cDNA G530011O06 gene G530011O06Rik  
1440343\_at 0.98328 "ribosomal protein S6 kinase, polypeptide 5" Rps6ka5  
1440344\_at 0.95993 Transcribed locus ---  
1440345\_at 1.17666 expressed sequence AI450353 AI450353  
1440346\_at 0.97748 Jumonji domain containing 3 Jmjd3  
1440347\_at 1.42935 Rho GTPase activating protein 10 Arhgap10  
1440348\_at 1.08740 "zinc finger, FYVE domain containing 9" Zfyve9  
1440349\_at 1.19930 Cyclin D binding myb-like transcription factor 1 Dmtf1  
1440350\_at 1.01215 --- ---  
1440351\_at 1.50132 Baculoviral IAP repeat-containing 4 Birc4  
1440352\_at 0.96814 region containing RIKEN cDNA 1700028E10 gene; hypothetical protein  
A630054D14 LOC625175  
1440353\_at 0.84763 neurotrophin 5 Ntf5  
1440354\_at 0.95460 "ELOVL family member 7, elongation of long chain fatty acids (yeast)" Elovl7  
1440355\_at 1.01103 potassium channel tetramerisation domain containing 12b Kctd12b  
1440356\_at 1.06763 cytokine induced apoptosis inhibitor 1 Ciapin1  
1440357\_at 1.03521 Transcribed locus ---  
1440358\_at 0.85249 Rho guanine nucleotide exchange factor (GEF) 15 Arhgef15  
1440359\_at 0.96573 RIKEN cDNA 1700012H17 gene 1700012H17Rik  
1440360\_at 1.59167 ADP-ribosylation factor-like 6 interacting protein 5 Arl6ip5  
1440361\_at 1.11261 "16 days embryo head cDNA, RIKEN full-length enriched library, clone:  
C130014E09 product:unclassifiable, full insert sequence" ---  
1440362\_at 0.92802 RIKEN cDNA A330068P14 gene A330068P14Rik  
1440363\_at 1.01500 Transcribed locus ---  
1440364\_a\_at 0.82290 RIKEN cDNA A230062G08 gene A230062G08Rik  
1440365\_at 1.59660 "Actin, beta, cytoplasmic" Actb  
1440366\_at 1.19276 "Solute carrier family 24 (sodium/potassium/calcium exchanger), member  
2" Slc24a2  
1440367\_at 1.04211 Phosphatidylglycerophosphate synthase 1 Pgs1  
1440368\_at 1.12991 Jumonji domain containing 2B Jmjd2b  
1440369\_at 1.05535 Prostaglandin E receptor 3 (subtype EP3) Ptger3  
1440370\_at 1.02952 "ATP-binding cassette, sub-family A (ABC1), member 13 /// similar to ATP  
binding cassette, sub-family A (ABC1), member 13" Abca13 /// LOC672028  
1440371\_at 0.95217 "2 days neonate sympathetic ganglion cDNA, RIKEN full-length enriched  
library, clone:7120457A19 product:unclassifiable, full insert sequence" ---  
1440372\_at 2.04957 ADP-ribosylation factor-like 15 Arl15  
1440373\_at 2.14789 "ELAV (embryonic lethal, abnormal vision, Drosophila)-like 1 (Hu antigen  
R)" Elavl1  
1440374\_at 0.91395 Phosphodiesterase 1C Pde1c  
1440375\_at 1.35200 RIKEN cDNA 5730419I09 gene 5730419I09Rik  
1440376\_at 0.95634 F-box protein 41 Fbxo41  
1440377\_at 0.92139 tigger transposable element derived 5 Tigd5  
1440378\_at 0.96265 --- ---

|            |                                                                                |               |
|------------|--------------------------------------------------------------------------------|---------------|
| 1440379_at | 1.12340 "solute carrier family 1 (neutral amino acid transporter), member 5"   | Slc1a5        |
| 1440380_at | 1.13538 "Capping protein (actin filament) muscle Z-line, alpha 1"              | Capza1        |
| 1440381_at | 1.16733 RIKEN cDNA 2410085M17 gene                                             | 2410085M17Rik |
| 1440382_at | 0.94778 cDNA sequence BC051628                                                 | BC051628      |
| 1440383_at | 0.85595 "DNA cross-link repair 1B, PSO2 homolog (S. cerevisiae)"               | Dclre1b       |
| 1440384_at | 0.96752 transmembrane and coiled coil domains 1                                | Tmcc1         |
| 1440385_at | 0.80030 RIKEN cDNA 9530051E23 gene                                             | 9530051E23Rik |
| 1440386_at | 1.04218 glucuronyl C5-epimerase                                                | Glce          |
| 1440387_at | 0.94099 RIKEN cDNA 2610005L07 gene                                             | 2610005L07Rik |
| 1440388_at | 1.06160 Transcribed locus                                                      | ---           |
| 1440389_at | 0.94273 ---                                                                    | ---           |
| 1440390_at | 0.91927 cDNA sequence BC025575                                                 | BC025575      |
| 1440391_at | 1.49955 hypothetical protein LOC638038                                         | LOC638038     |
| 1440392_at | 1.29281 A kinase (PRKA) anchor protein 13                                      | Akap13        |
| 1440393_at | 0.87953 Odd Oz/ten-m homolog 2 (Drosophila)                                    | Odz2          |
| 1440394_at | 1.10164 ---                                                                    | ---           |
| 1440395_at | 1.09625 RNA binding motif protein 21                                           | Rbm21         |
| 1440396_at | 1.19333 "Membrane protein, palmitoylated 6 (MAGUK p55 subfamily member 6)"     | Mpp6          |
| 1440397_at | 0.92007 ---                                                                    | ---           |
| 1440398_at | 1.05509 ---                                                                    | ---           |
| 1440399_at | 0.94885 Ubiquitin specific peptidase 32                                        | Usp32         |
| 1440400_at | 1.49395 ---                                                                    | ---           |
| 1440401_at | 0.95921 ---                                                                    | ---           |
| 1440402_at | 0.96444 RIKEN cDNA 4831426I19 gene                                             | 4831426I19Rik |
| 1440403_at | 1.24589 Rho guanine nucleotide exchange factor (GEF) 1                         | Arhgef1       |
| 1440404_at | 1.61869 ---                                                                    | ---           |
| 1440405_at | 1.08208 Adenylate cyclase 3                                                    | Adcy3         |
| 1440406_at | 0.94641 G patch domain containing 3                                            | Gpatc3        |
| 1440407_at | 0.86331 ---                                                                    | ---           |
| 1440408_at | 1.12810 RIKEN cDNA B830008J18 gene                                             | B830008J18Rik |
| 1440409_at | 1.11822 RIKEN cDNA 2210401J11 gene                                             | 2210401J11Rik |
| 1440410_at | 0.96425 RIKEN cDNA A930011G23 gene                                             | A930011G23Rik |
| 1440411_at | 0.89847 Transcribed locus                                                      | ---           |
| 1440412_at | 1.03841 "Immunoglobulin superfamily, member 4"                                 | Igsf4d        |
| 1440413_at | 0.99231 RIKEN cDNA A830006F12 gene                                             | A830006F12Rik |
| 1440414_at | 1.04628 metal response element binding transcription factor 1                  | Mtf1          |
| 1440415_at | 0.89050 "0 day neonate thymus cDNA, RIKEN full-length enriched library, clone: |               |
| A430095E15 | product:unclassifiable, full insert sequence"                                  | ---           |
| 1440416_at | 1.06993 Ubiquitin specific peptidase 46                                        | Usp46         |
| 1440417_at | 2.54722 "DNA segment, Chr 19, ERATO Doi 409, expressed"                        | D19Ert409e    |
| 1440418_at | 0.97417 ---                                                                    | ---           |
| 1440419_at | 1.04683 "gene model 1679, (NCBI)"                                              | Gm1679        |

|            |         |                                                                                                     |                                        |
|------------|---------|-----------------------------------------------------------------------------------------------------|----------------------------------------|
| 1440420_at | 0.91498 | "Serine/threonine kinase 24 (STE20 homolog, yeast)"                                                 | Stk24                                  |
| 1440421_at | 1.24849 | RIKEN cDNA 2700085M18 gene                                                                          | 2700085M18Rik                          |
| 1440422_at | 0.95050 | 5-hydroxytryptamine (serotonin) receptor 1F                                                         | Htr1f                                  |
| 1440423_at | 0.95865 | zinc finger and BTB domain containing 37                                                            | Zbtb37                                 |
| 1440424_at | 0.86899 | "Troponin T2, cardiac"                                                                              | Tnnt2                                  |
| 1440425_at | 0.90666 | ---                                                                                                 | ---                                    |
| 1440426_at | 0.94557 | "nuclear factor of activated T-cells, cytoplasmic, calcineurin-dependent 2"                         | Nfatc2                                 |
| 1440427_at | 1.02678 | expressed sequence BB124205                                                                         | BB124205                               |
| 1440428_at | 0.99122 | sideroflexin 5                                                                                      | Sfxn5                                  |
| 1440429_at | 1.16044 | "cyclic AMP-regulated phosphoprotein, 21"                                                           | Arpp21                                 |
| 1440430_at | 1.06966 | RIKEN cDNA A130004G07 gene                                                                          | A130004G07Rik                          |
| 1440431_at | 1.36636 | Myeloid ecotropic viral integration site 1                                                          | Meis1                                  |
| 1440432_at | 0.98878 | Leucine zipper transcription factor-like 1                                                          | Lztfl1                                 |
| 1440433_at | 1.04839 | N-myristoyltransferase 2                                                                            | Nmt2                                   |
| 1440434_at | 1.18418 | ---                                                                                                 | ---                                    |
| 1440435_at | 0.92155 | kyphoscoliosis peptidase                                                                            | Ky                                     |
| 1440436_at | 0.93468 | hypothetical protein A730030A06                                                                     | A730030A06                             |
| 1440437_at | 1.02440 | hect (homologous to the E6-AP (UBE3A) carboxyl terminus) domain and RCC1 (CHC1)-like domain (RLD) 1 | Herc1                                  |
| 1440438_at | 0.89073 | WASP family 1                                                                                       | Wasf1                                  |
| 1440439_at | 1.42308 | Expressed sequence AI591476                                                                         | AI591476                               |
| 1440440_at | 2.24390 | ---                                                                                                 | ---                                    |
| 1440441_at | 1.48349 | F-box and leucine-rich repeat protein 7                                                             | Fbxl7                                  |
| 1440442_at | 0.96809 | mitogen activated protein kinase kinase 7                                                           | Map2k7                                 |
| 1440443_at | 1.18324 | RIKEN cDNA E030016H06 gene                                                                          | E030016H06Rik                          |
| 1440444_at | 1.42972 | fatty acid desaturase 1                                                                             | Fads1                                  |
| 1440445_at | 1.00080 | Pax6 opposite strand transcript 1                                                                   | Pax6os1                                |
| 1440446_at | 0.97111 | similar to naked cuticle 1 homolog                                                                  | /// similar to naked cuticle 1 homolog |
| LOC634379  | ///     | LOC671838                                                                                           |                                        |
| 1440447_at | 0.89983 | abhydrolase domain containing 2                                                                     | Abhd2                                  |
| 1440448_at | 1.25869 | Transcribed locus                                                                                   | ---                                    |
| 1440449_at | 1.00411 | leucine rich repeat containing 40                                                                   | Lrrc40                                 |
| 1440450_at | 1.01448 | Heat shock protein 1-like                                                                           | Hspa11                                 |
| 1440451_at | 0.95263 | RIKEN cDNA D730048J04 gene                                                                          | D730048J04Rik                          |
| 1440452_at | 0.94188 | dystrophin related protein 2                                                                        | Drp2                                   |
| 1440453_at | 1.02426 | RIKEN cDNA 1700012C15 gene                                                                          | 1700012C15Rik                          |
| 1440454_at | 0.99632 | RIKEN cDNA A530088I07 gene                                                                          | A530088I07Rik                          |
| 1440455_at | 0.90338 | expressed sequence AI848599                                                                         | AI848599                               |
| 1440456_at | 0.95820 | similar to KIAA0944 protein                                                                         | LOC381255                              |
| 1440457_at | 1.18749 | "Clathrin, heavy polypeptide (Hc)"                                                                  | Cltc                                   |
| 1440458_at | 1.06707 | cytidine monophospho-N-acetylneuraminic acid hydroxylase                                            | Cmah                                   |
| 1440459_at | 1.42278 | senataxin                                                                                           | Setx                                   |

1440460\_at 0.92529 RIKEN cDNA 4930504O13 gene 4930504O13Rik  
1440461\_at 4.62722 RIKEN cDNA 0910001A06 gene 0910001A06Rik  
1440462\_at 1.61564 RIKEN cDNA B930068K11 gene B930068K11Rik  
1440463\_at 0.94147 N-glycanase 1 Ngly1  
1440464\_at 1.46557 "ELAV (embryonic lethal, abnormal vision, Drosophila)-like 1 (Hu antigen R)" Elavl1  
1440465\_at 0.91149 Cut-like 1 (Drosophila) Cutl1  
1440466\_at 1.08236 cDNA sequence BC003965 BC003965  
1440467\_at 0.91046 cDNA sequence BC028799 /// RIKEN cDNA 4922501C03 gene BC028799 /// 4922501C03Rik  
1440468\_at 0.96985 RIKEN cDNA D630023F18 gene D630023F18Rik  
1440469\_at 0.87690 hypothetical protein LOC629141 LOC629141  
1440470\_at 0.82802 Transcribed locus ---  
1440471\_x\_at 0.92320 --- ---  
1440472\_at 0.94346 sperm associated antigen 17 Spag17  
1440473\_at 1.07927 RAS related protein 2a Rap2a  
1440474\_at 0.95671 --- ---  
1440475\_at 0.94870 expressed sequence AW011738 AW011738  
1440476\_at 0.94055 "DNA segment, Chr 6, ERATO Doi 474, expressed" D6Ertd474e  
1440477\_at 1.08207 --- ---  
1440478\_at 1.04339 "DNA segment, Chr 10, ERATO Doi 438, expressed" D10Ertd438e  
1440479\_at 0.96309 "Chromobox homolog 4 (Drosophila Pc class) /// 10 days lactation, adult female mammary gland cDNA, RIKEN full-length enriched library, clone:D730014L03 product:unclassifiable, full insert sequence" Cbx4  
1440480\_at 1.06670 cDNA sequence AB182283 AB182283  
1440481\_at 1.19721 signal transducer and activator of transcription 1 Stat1  
1440482\_at 1.15802 vacuolar protein sorting 13A (yeast) Vps13a  
1440483\_at 1.12924 "Pleckstrin homology domain containing, family M (with RUN domain) member 2" Plekhm2  
1440484\_at 0.90516 unc-5 homolog D (C. elegans) Unc5d  
1440485\_at 0.98938 --- ---  
1440486\_at 0.93815 RIKEN cDNA 2310037I24 gene 2310037I24Rik  
1440487\_at 1.10066 "0 day neonate cerebellum cDNA, RIKEN full-length enriched library, clone: C230056E17 product:unclassifiable, full insert sequence" ---  
1440488\_at 1.20283 --- ---  
1440489\_at 0.76386 BTB (POZ) domain containing 4 Btbd4  
1440490\_at 1.29365 "Membrane protein, palmitoylated 6 (MAGUK p55 subfamily member 6)" Mpp6  
1440491\_at 1.00865 "solute carrier family 1 (glial high affinity glutamate transporter), member 3" Slc1a3  
1440492\_at 1.16118 Exportin 6 Xpo6  
1440493\_at 1.03773 UDP-N-acetyl-alpha-D-galactosamine:polypeptide N-acetylgalactosaminyltransferase 10 Galnt10



1440494\_at 1.01345 MIF4G domain containing Mif4gd  
 1440495\_at 0.93382 dorso-medial telencephalon gene 2 Dmt2  
 1440496\_at 1.06174 sorting and assembly machinery component 50 homolog (S. cerevisiae)  
 Samm50  
 1440497\_at 0.95853 CDNA clone IMAGE:5690974 ---  
 1440498\_at 1.18761 RAB interacting factor Rabif  
 1440499\_at 0.88850 "DNA segment, Chr 9, ERATO Doi 26, expressed" D9Ertd26e  
 1440500\_at 1.05276 Mitogen activated protein kinase kinase kinase 10 Map3k10  
 1440501\_at 0.96591 expressed sequence AU041480 AU041480  
 1440502\_at 0.95993 RIKEN cDNA 4930485B16 gene 4930485B16Rik  
 1440503\_at 1.01806 "3 days neonate thymus cDNA, RIKEN full-length enriched library, clone:  
 A630095O16 product:unclassifiable, full insert sequence" ---  
 1440504\_at 1.05682 Coiled-coil domain containing 39 Ccdc39  
 1440505\_at 0.83414 "phosphatidylinositol-specific phospholipase C, X domain containing 1" Plcxd1  
 1440506\_at 1.12205 "Solute carrier family 7 (cationic amino acid transporter, y+ system), member  
 2" Slc7a2  
 1440507\_at 0.96569 CD151 antigen Cd151  
 1440508\_at 1.01978 "Adult male hippocampus cDNA, RIKEN full-length enriched library, clone:  
 C630033O16 product:unclassifiable, full insert sequence" ---  
 1440509\_at 1.04273 SRY-box containing gene 30 Sox30  
 1440510\_at 0.86188 RIKEN cDNA C430002N11 gene C430002N11Rik  
 1440511\_at 1.31159 "Proteasome (prosome, macropain) activator subunit 4" Psme4  
 1440512\_at 1.16180 expressed sequence AW048066 AW048066  
 1440513\_at 2.05183 expressed sequence C80258 C80258  
 1440514\_at 1.00630 "DNA segment, Chr 3, ERATO Doi 508, expressed" D3Ertd508e  
 1440515\_at 1.02366 similar to Doublecortin domain-containing protein 2 /// similar to Doublecortin  
 domain-containing protein 2 /// similar to Doublecortin domain-containing protein 2 LOC635529 ///  
 LOC667452 /// LOC672313  
 1440516\_at 0.97277 "13 days embryo heart cDNA, RIKEN full-length enriched library, clone:  
 D330017K01 product:unclassifiable, full insert sequence" ---  
 1440517\_x\_at 0.97525 cytidine monophospho-N-acetylneuraminic acid hydroxylase Cmah  
 1440518\_at 0.97861 RIKEN cDNA 1700029I01 gene 1700029I01Rik  
 1440519\_at 1.00657 trans-acting transcription factor 8 Sp8  
 1440520\_a\_at 1.02492 RIKEN cDNA 1700051A21 gene 1700051A21Rik  
 1440521\_x\_at 0.88514 RIKEN cDNA 1700051A21 gene 1700051A21Rik  
 1440522\_at 0.88379 hypothetical protein B930075F07 B930075F07  
 1440523\_at 0.90481 retinal short chain dehydrogenase reductase 2 Rdhe2  
 1440524\_at 0.98187 "ubiquitously transcribed tetratricopeptide repeat gene, X chromosome" Utx  
 1440525\_at 0.79717 "In vitro fertilized eggs cDNA, RIKEN full-length enriched library,  
 clone:7420418N15 product:unclassifiable, full insert sequence" ---  
 1440526\_at 1.02867 RIKEN cDNA D130029J02 gene D130029J02Rik  
 1440527\_at 0.81640 "Transcribed locus, strongly similar to NP\_035188.1 platelet derived growth  
 factor receptor, alpha polypeptide [Mus musculus]" ---

1440528\_at 1.08273 Transcribed locus ---  
1440529\_at 1.09582 Transcribed locus ---  
1440530\_at 1.02586 expressed sequence AU019752 AU019752  
1440531\_at 0.93126 RNA binding motif protein 11 Rbm11  
1440532\_a\_at 1.01714 "Adult male diencephalon cDNA, RIKEN full-length enriched library, clone:9330176F03 product:unclassifiable, full insert sequence" ---  
1440533\_at 1.06741 Bifunctional apoptosis regulator Bfar  
1440534\_at 1.04236 "Adult male hypothalamus cDNA, RIKEN full-length enriched library, clone:A230069K02 product:hypothetical protein, full insert sequence" ---  
1440535\_at 0.96372 uroporphyrinogen III synthase Uros  
1440536\_at 1.08932 "Solute carrier family 22 (organic cation transporter), member 5" Slc22a5  
1440537\_at 0.97191 "potassium channel, subfamily V, member 2" Kcnv2  
1440538\_at 0.99737 --- ---  
1440539\_at 1.16427 --- ---  
1440540\_at 1.50364 GLE1 RNA export mediator-like (yeast Gle11  
1440541\_at 1.11001 RIKEN cDNA 2810442I21 gene 2810442I21Rik  
1440542\_at 0.99110 RIKEN cDNA 7420416P09 gene 7420416P09Rik  
1440543\_at 1.13805 RIKEN cDNA D930036F22 gene D930036F22Rik  
1440544\_at 1.01878 "Solute carrier family 14 (urea transporter), member 2" Slc14a2  
1440545\_at 0.89276 "Adult male corpora quadrigemina cDNA, RIKEN full-length enriched library, clone:B230378A03 product:hypothetical protein, full insert sequence" ---  
1440546\_at 1.12331 RIKEN cDNA 9630002D21 gene 9630002D21Rik  
1440547\_at 1.07272 --- ---  
1440548\_at 1.19605 BTB (POZ) domain containing 9 Btbd9  
1440549\_at 1.31542 RIKEN cDNA B230334L07 gene B230334L07Rik  
1440550\_at 1.03427 "Adult male corpora quadrigemina cDNA, RIKEN full-length enriched library, clone:B230313K13 product:unclassifiable, full insert sequence" ---  
1440551\_at 2.04308 "DnaJ (Hsp40) homolog, subfamily C, member 1" Dnajc1  
1440552\_at 1.02347 Ubiquitin protein ligase E3 component n-recognin 1 Ubr1  
1440553\_at 1.02014 mitochondrial trans-2-enoyl-CoA reductase Mecr  
1440554\_at 1.08535 --- ---  
1440555\_at 0.99411 Ras-related GTP binding D Rragd  
1440556\_at 1.00940 --- ---  
1440557\_at 0.95838 imprinted gene in the Prader-Willi syndrome region Ipw  
1440558\_at 1.00868 --- ---  
1440559\_at 1.17749 "high mobility group AT-hook 2, pseudogene 1" Hmga2-ps1  
1440560\_at 1.12757 Yippee-like 2 (Drosophila) Ypel2  
1440561\_at 1.03892 expressed sequence C87259 C87259  
1440562\_at 0.97202 "Adult male corpora quadrigemina cDNA, RIKEN full-length enriched library, clone:B230304I02 product:hypothetical protein, full insert sequence" ---  
1440563\_at 0.92456 RIKEN cDNA 2010111I01 gene 2010111I01Rik  
1440564\_at 1.19076 prokineticin receptor 2 Prokr2  
1440565\_at 1.29988 Zinc finger and BTB domain containing 20 Zbtb20

|               |         |                                                                                                                                       |                                      |
|---------------|---------|---------------------------------------------------------------------------------------------------------------------------------------|--------------------------------------|
| 1440566_at    | 0.87665 | RIKEN cDNA D330005C11 gene                                                                                                            | D330005C11Rik                        |
| 1440567_at    | 1.43001 | RIKEN cDNA D030051N19 gene                                                                                                            | D030051N19Rik                        |
| 1440568_at    | 1.00786 | protection of telomeres 1                                                                                                             | Pot1                                 |
| 1440569_at    | 1.02736 | "solute carrier family 16 (monocarboxylic acid transporters), member 10"                                                              |                                      |
| Slc16a10      |         |                                                                                                                                       |                                      |
| 1440570_at    | 0.98678 | Lipoma HMGIC fusion partner-like 3                                                                                                    | Lhfp13                               |
| 1440571_at    | 0.94512 | "Eukaryotic translation initiation factor 4 gamma, 3"                                                                                 | Eif4g3                               |
| 1440572_at    | 0.93576 | dual specificity phosphatase 19                                                                                                       | Dusp19                               |
| 1440573_at    | 2.94189 | ErbB2 interacting protein                                                                                                             | ErbB2ip                              |
| 1440574_at    | 0.93050 | Recombination activating gene 1                                                                                                       | Rag1                                 |
| 1440575_at    | 1.59884 | heat shock protein 4                                                                                                                  | Hspa4                                |
| 1440576_at    | 0.88318 | "carboxypeptidase N, polypeptide 1"                                                                                                   | Cpn1                                 |
| 1440577_at    | 1.10106 | "Muskelin 1, intracellular mediator containing kelch motifs"                                                                          | Mkln1                                |
| 1440578_at    | 1.35553 | Kinesin family member 13A                                                                                                             | Kif13a                               |
| 1440579_at    | 1.68560 | ---                                                                                                                                   | ---                                  |
| 1440580_at    | 1.21658 | RIKEN cDNA C030014M07 gene                                                                                                            | /// similar to RIKEN cDNA C920006C10 |
| C030014M07Rik |         | /// LOC668212                                                                                                                         |                                      |
| 1440581_at    | 0.95683 | RIKEN cDNA A530088H08 gene                                                                                                            | A530088H08Rik                        |
| 1440582_at    | 1.37406 | itchy                                                                                                                                 | /// RIKEN cDNA 8030492O04 gene Itch  |
| 1440583_at    | 0.94781 | "DNA segment, Chr 6, Wayne State University 116, expressed"                                                                           | D6Wsu116e                            |
| 1440584_at    | 1.06744 | RIKEN cDNA 9130221L21 gene                                                                                                            | 9130221L21Rik                        |
| 1440585_at    | 1.01220 | Syntaxin 6                                                                                                                            | Stx6                                 |
| 1440586_at    | 1.40725 | RIKEN cDNA B430203I24 gene                                                                                                            | B430203I24Rik                        |
| 1440587_at    | 1.14036 | ---                                                                                                                                   | ---                                  |
| 1440588_at    | 0.99099 | ---                                                                                                                                   | ---                                  |
| 1440589_at    | 0.89684 | Sterile alpha motif domain containing 12                                                                                              | Samd12                               |
| 1440590_at    | 1.35796 | ---                                                                                                                                   | ---                                  |
| 1440591_at    | 0.95560 | ---                                                                                                                                   | ---                                  |
| 1440592_at    | 1.02789 | CD80 antigen                                                                                                                          | Cd80                                 |
| 1440593_at    | 1.01989 | Basonuclin 2                                                                                                                          | Bnc2                                 |
| 1440594_at    | 1.19252 | "Protein phosphatase 1, catalytic subunit, gamma isoform"                                                                             | Ppp1cc                               |
| 1440595_at    | 1.04520 | erythrocyte protein band 4.1-like 3                                                                                                   | Epb4.113                             |
| 1440596_at    | 1.03948 | calcineurin binding protein 1                                                                                                         | Cabin1                               |
| 1440597_at    | 1.07118 | ---                                                                                                                                   | ---                                  |
| 1440598_at    | 0.95638 | "syntrophin, gamma 1"                                                                                                                 | Sntg1                                |
| 1440599_at    | 1.08539 | olfactory receptor 658                                                                                                                | OlfR658                              |
| 1440600_at    | 0.95091 | RIKEN cDNA 4930407I10 gene                                                                                                            | 4930407I10Rik                        |
| 1440601_at    | 1.00584 | Transcribed locus                                                                                                                     | ---                                  |
| 1440602_at    | 1.08933 | "Glutamate receptor, ionotropic, kainate 2 (beta 2)"                                                                                  | Grik2                                |
| 1440603_at    | 1.02134 | "Adult male corpus striatum cDNA, RIKEN full-length enriched library, clone: C030004I15 product:unclassifiable, full insert sequence" | ---                                  |
| 1440604_at    | 1.08380 | Riken cDNA 8030494B02 gene                                                                                                            | 8030494B02Rik                        |
| 1440605_at    | 0.97461 | "fascin homolog 2, actin-bundling protein, retinal (Strongylocentrotus                                                                |                                      |

purpuratus)" Fscn2  
1440606\_at 1.08326 Transmembrane protein 97 Tmem97  
1440607\_at 1.11705 Checkpoint suppressor 1 Ches1  
1440608\_at 0.96985 "10 days neonate skin cDNA, RIKEN full-length enriched library,  
clone:4732488M12 product:unclassifiable, full insert sequence" ---  
1440609\_at 1.63761 mitogen-activated protein kinase kinase kinase 4 Map4k4  
1440610\_at 0.97447 CAS1 domain containing 1 Casd1  
1440611\_at 0.94331 RIKEN cDNA 6230409E13 gene 6230409E13Rik  
1440612\_at 0.99717 --- ---  
1440613\_at 0.89852 Per1-like domain containing 1 Perld1  
1440614\_at 1.05327 Rho GTPase activating protein 23 Arhgap23  
1440615\_at 1.42950 dual specificity phosphatase 16 Dusp16  
1440616\_at 1.00396 expressed sequence AU042410 AU042410  
1440617\_at 0.96269 carboxypeptidase A6 Cpa6  
1440618\_at 1.24519 hypothetical protein 9130416B15 9130416B15  
1440619\_at 0.88703 mitogen activated protein kinase 8 interacting protein 1 Mapk8ip1  
1440620\_at 0.95564 "RAB8A, member RAS oncogene family" Rab8a  
1440621\_at 1.25766 Kit ligand Kitl  
1440622\_at 1.22560 SEC15-like 2 (S. cerevisiae) Sec15l2  
1440623\_at 0.92397 G protein-coupled receptor 26 Gpr26  
1440624\_at 0.97363 "Protein tyrosine phosphatase, receptor type, D" Ptpnd  
1440625\_at 0.98720 RIKEN cDNA D930015E06 gene D930015E06Rik  
1440626\_at 1.00927 Homeo box D13 Hoxd13  
1440627\_at 1.07238 "ATPase, aminophospholipid transporter-like, class I, type 8A, member 2"  
Atp8a2  
1440628\_at 1.08790 --- ---  
1440629\_at 1.03818 eukaryotic translation termination factor 1 Etf1  
1440630\_at 0.94717 "Adult male olfactory brain cDNA, RIKEN full-length enriched library,  
clone:6430514A06 product:unclassifiable, full insert sequence" ---  
1440631\_at 1.08241 --- ---  
1440632\_at 0.97184 protocadherin beta 4 Pcdh4  
1440633\_at 1.23720 nei like 3 (E. coli) Neil3  
1440634\_at 1.04197 Glypican 6 Gpc6  
1440635\_at 0.91635 "palladin, cytoskeletal associated protein" Pall1  
1440636\_at 0.86051 Mitochondrial ribosomal protein L3 Mrpl3  
1440637\_at 2.22743 Intersectin 1 (SH3 domain protein 1A) Itsn1  
1440638\_at 0.96117 RIKEN cDNA A230107N01 gene A230107N01Rik  
1440639\_at 1.00129 "discs, large (Drosophila) homolog-associated protein 1" Dlgap1  
1440640\_at 0.91983 RIKEN cDNA 2010111I01 gene 2010111I01Rik  
1440641\_at 1.65187 vacuolar protein sorting 29 (S. pombe) Vps29  
1440642\_at 0.88897 RIKEN cDNA D630042P16 gene D630042P16Rik  
1440643\_at 1.47774 --- ---  
1440644\_at 1.02632 "poly (ADP-ribose) polymerase family, member 6" Parp6

1440645\_at 1.03697 similar to deleted in malignant brain tumors 1 isoform c precursor  
 LOC546006  
 1440646\_at 1.23291 CDNA sequence BC052040 BC052040  
 1440647\_at 1.14865 signal-induced proliferation-associated 1 like 1 Sipal11  
 1440648\_at 0.95970 Coenzyme Q10 homolog A (yeast) Coq10a  
 1440649\_at 1.10655 Testis derived transcript Tes  
 1440650\_at 1.02981 Slit homolog 2 (Drosophila) Slit2  
 1440651\_at 1.56735 Dual specificity phosphatase 16 Dusp16  
 1440652\_at 1.08427 ankyrin repeat domain 44 Ankrd44  
 1440653\_at 1.47720 Pleckstrin homology domain interacting protein Phip  
 1440654\_at 0.92468 Hypothetical protein LOC574403 MGC99845  
 1440655\_at 1.00052 Transcribed locus ---  
 1440656\_at 1.05228 "HECT, C2 and WW domain containing E3 ubiquitin protein ligase 1"  
 Hecw1  
 1440657\_at 1.02136 Contactin 3 Cntn3  
 1440658\_at 1.04821 RIKEN cDNA E230022H04 gene E230022H04Rik  
 1440659\_at 1.19347 RIKEN cDNA 2610027L16 gene 2610027L16Rik  
 1440660\_at 1.13880 Nuclear factor I/A Nfia  
 1440661\_at 0.85726 RIKEN cDNA A430010J10 gene A430010J10Rik  
 1440662\_at 1.16525 "Ral guanine nucleotide dissociation stimulator,-like 1" Rgl1  
 1440663\_at 0.95566 Exportin 4 Xpo4  
 1440664\_at 0.95148 "cat eye syndrome chromosome region, candidate 5 homolog (human)"  
 Cocr5  
 1440665\_at 0.84305 --- ---  
 1440666\_at 0.99131 RIKEN cDNA 4933430I17 gene 4933430I17Rik  
 1440667\_at 0.89376 "DNA cross-link repair 1B, PSO2 homolog (S. cerevisiae)" Dclre1b  
 1440668\_at 0.95989 ADAMTS-like 3 Adamts13  
 1440669\_at 0.96792 RIKEN cDNA B230217O12 gene B230217O12Rik  
 1440670\_at 1.10182 Transcribed locus ---  
 1440671\_at 2.00065 RIKEN cDNA A130012E19 gene A130012E19Rik  
 1440672\_at 0.84615 similar to zinc finger protein 541 /// similar to zinc finger protein 541 /// similar  
 to zinc finger protein 541 LOC638394 /// LOC666528 /// LOC670763  
 1440673\_at 0.87791 Exonuclease domain containing 1 Exod1  
 1440674\_at 0.89958 EGF-like repeats and discoidin I-like domains 3 Edil3  
 1440675\_at 1.04282 Glucocorticoid receptor DNA binding factor 1 Grlf1  
 1440676\_at 0.77971 RIKEN cDNA A830043J08 gene A830043J08Rik  
 1440677\_at 1.03726 similar to hypothetical protein FLJ38281 LOC245305  
 1440678\_at 1.12246 Latent transforming growth factor beta binding protein 1 Ltbp1  
 1440679\_at 1.09541 Transcribed locus ---  
 1440680\_at 0.97840 Transcribed locus ---  
 1440681\_at 0.87571 "cholinergic receptor, nicotinic, alpha polypeptide 7" Chrna7  
 1440682\_at 0.91534 Odd Oz/ten-m homolog 4 (Drosophila) Odz4  
 1440683\_at 1.18235 RIKEN cDNA A930004D18 gene A930004D18Rik

1440684\_at 0.98240 acyltransferase like 1 Ayt1l  
1440685\_at 0.91677 Calcitonin receptor-like Calcr1  
1440686\_at 1.10847 "protease, serine 27" Prss27  
1440687\_at 0.86750 "6 days neonate head cDNA, RIKEN full-length enriched library, clone:5430439N10 product:unclassifiable, full insert sequence" ---  
1440688\_at 1.06111 Rho GTPase activating protein 26 Arhgap26  
1440689\_at 1.05830 forkhead box K2 Foxk2  
1440690\_at 3.72533 Nipped-B homolog (Drosophila) Nipbl  
1440691\_at 0.90477 "cytochrome P450, family 2, subfamily j, polypeptide 6" Cyp2j6  
1440692\_at 0.98371 "gene model 364, (NCBI)" Gm364  
1440693\_at 1.31374 "palladin, cytoskeletal associated protein" Palld  
1440694\_at 1.05301 --- ---  
1440695\_at 1.15932 Zinc finger protein 40 Zfp40  
1440696\_at 0.90118 RIKEN cDNA 2300002D11 gene 2300002D11Rik  
1440697\_at 0.93829 expressed sequence AI746446 AI746446  
1440698\_at 0.91669 Unc-5 homolog C (C. elegans) Unc5c  
1440699\_at 0.88783 microtubule-associated protein 2 Mtap2  
1440700\_a\_at 0.99851 rho/rac guanine nucleotide exchange factor (GEF) 18 Arhgef18  
1440701\_at 0.96966 RIKEN cDNA C530008M17 gene C530008M17Rik  
1440702\_at 0.95013 expressed sequence AU022297 AU022297  
1440703\_at 0.96185 RIKEN cDNA 2810429I04 gene 2810429I04Rik  
1440704\_at 1.00725 relaxin/insulin-like family peptide receptor 2 Rxfp2  
1440705\_at 0.92057 expressed sequence AU021720 AU021720  
1440706\_at 1.00960 bone morphogenetic protein 8b Bmp8b  
1440707\_at 1.01889 doublesex and mab-3 related transcription factor 3 Dmrt3  
1440708\_at 1.36964 "myosin, heavy polypeptide 9, non-muscle" Myh9  
1440709\_at 0.73449 RIKEN cDNA C130081A10 gene C130081A10Rik  
1440710\_at 0.94049 zinc finger protein 706 Zfp706  
1440711\_at 0.93139 RIKEN cDNA C630001G18 gene C630001G18Rik  
1440712\_at 1.10711 Poly(rC) binding protein 3 Pcbp3  
1440713\_at 0.93876 RIKEN cDNA 4933407H18 gene 4933407H18Rik  
1440714\_at 1.01854 Transcribed locus ---  
1440715\_s\_at 1.01068 "DNA segment, Chr 11, ERATO Doi 497, expressed" D11Ertd497e  
1440716\_at 0.98829 RIKEN cDNA 6430604M11 gene 6430604M11Rik  
1440717\_at 1.16168 expressed sequence AA407881 AA407881  
1440718\_at 1.14709 cDNA sequence BC052328 BC052328  
1440719\_at 1.29104 GLE1 RNA export mediator-like (yeast Gle1l  
1440720\_s\_at 1.04882 GLE1 RNA export mediator-like (yeast Gle1l  
1440721\_at 1.75311 RIKEN cDNA 5930433N17 gene 5930433N17Rik  
1440722\_at 1.09057 "DNA segment, Chr 19, ERATO Doi 386, expressed" D19Ertd386e  
1440723\_at 0.96592 --- ---  
1440724\_at 1.07072 expressed sequence AI854703 AI854703  
1440725\_at 1.01354 G protein-coupled receptor 63 Gpr63

1440726\_at 1.07001 RIKEN cDNA A230062I15 gene A230062I15Rik  
1440727\_at 1.01171 Transcribed locus ---  
1440728\_at 0.95670 "Potassium large conductance calcium-activated channel, subfamily M, alpha member 1" Kcnma1  
1440729\_at 1.11865 epidermal growth factor receptor pathway substrate 15 Eps15  
1440730\_at 1.25815 --- ---  
1440731\_at 0.97454 expressed sequence AI413759 AI413759  
1440732\_at 0.88933 RIKEN cDNA D030018L15 gene D030018L15Rik  
1440733\_at 0.87282 RIKEN cDNA 1200009O22 gene 1200009O22Rik  
1440734\_at 1.05716 tau tubulin kinase 2 Ttbk2  
1440735\_at 1.06168 polymerase (RNA) III (DNA directed) polypeptide K Polr3k  
1440736\_at 1.07015 expressed sequence AI131651 AI131651  
1440737\_at 1.00610 InaD-like (Drosophila) Inadl  
1440738\_at 1.02367 RIKEN cDNA B020011L13 gene B020011L13Rik  
1440739\_at 0.71926 vascular endothelial growth factor C Vegfc  
1440740\_at 1.66776 "CTD (carboxy-terminal domain, RNA polymerase II, polypeptide A) small phosphatase like 2" Ctdspl2  
1440741\_at 1.04880 5-hydroxytryptamine (serotonin) receptor 1D Htr1d  
1440742\_at 1.04562 Enhancer of polycomb homolog 1 (Drosophila) Epc1  
1440743\_at 0.87304 RIKEN cDNA 4931428F04 gene 4931428F04Rik  
1440744\_at 0.95016 Peptidase inhibitor 16 Pi16  
1440745\_at 0.96355 PR domain containing 16 Prdm16  
1440746\_at 1.02138 MYST histone acetyltransferase 2 Myst2  
1440747\_at 1.01965 coproporphyrinogen oxidase Cpox  
1440748\_at 0.90392 --- ---  
1440749\_at 0.93525 Mitogen-activated protein kinase kinase kinase 13 Map3k13  
1440750\_at 0.99093 Transcribed locus ---  
1440751\_at 1.13479 E1A binding protein p400 Ep400  
1440752\_at 0.94117 Sal-like 4 (Drosophila) Sall4  
1440753\_at 0.89581 Transcribed locus ---  
1440754\_at 1.18692 Ankyrin repeat and KH domain containing 1 Ankhd1  
1440755\_at 1.14636 Neighbor of Brca1 gene 1 Nbr1  
1440756\_at 1.10321 --- ---  
1440757\_at 1.01240 "10 days neonate cerebellum cDNA, RIKEN full-length enriched library, clone: B930073N06 product:unclassifiable, full insert sequence" ---  
1440758\_at 1.01499 --- ---  
1440759\_at 0.97320 "Adult male corpora quadrigemina cDNA, RIKEN full-length enriched library, clone:B230398E24 product:hypothetical protein, full insert sequence" ---  
1440760\_at 0.96327 Lymphoid enhancer binding factor 1 Lef1  
1440761\_at 0.99515 RIKEN cDNA 4833422C13 gene 4833422C13Rik  
1440762\_at 0.97931 synapsin II Syn2  
1440763\_at 0.90759 Transcribed locus ---  
1440764\_at 1.11552 v-raf murine sarcoma 3611 viral oncogene homolog Araf

|              |         |                                                                        |               |  |
|--------------|---------|------------------------------------------------------------------------|---------------|--|
| 1440765_at   | 1.12170 | Fraser syndrome 1 homolog (human)                                      | Fras1         |  |
| 1440766_at   | 0.97872 | Guanine nucleotide binding protein-like 3 (nucleolar)                  | Gnl3          |  |
| 1440767_at   | 1.03572 | defensin beta 41                                                       | Defb41        |  |
| 1440768_x_at | 1.09606 | RIKEN cDNA 1700052I22 gene                                             | 1700052I22Rik |  |
| 1440769_at   | 0.88926 | RIKEN cDNA 2010305A19 gene                                             | 2010305A19Rik |  |
| 1440770_at   | 1.25012 | B-cell leukemia/lymphoma 2                                             | Bcl2          |  |
| 1440771_at   | 1.58814 | zinc finger with KRAB and SCAN domains 1                               | Zkscan1       |  |
| 1440772_x_at | 0.99607 | RIKEN cDNA 9530077C05 gene                                             | 9530077C05Rik |  |
| 1440773_at   | 0.95187 | RIKEN cDNA 2410004P22 gene                                             | 2410004P22Rik |  |
| 1440774_x_at | 1.05095 | cDNA sequence BC052883                                                 | BC052883      |  |
| 1440775_at   | 0.92995 | RIKEN cDNA 1700054K19 gene                                             | 1700054K19Rik |  |
| 1440776_at   | 0.88759 | RIKEN cDNA 3732412D22 gene                                             | 3732412D22Rik |  |
| 1440777_x_at | 1.03823 | ---                                                                    | ---           |  |
| 1440778_x_at | 0.93304 | Zinc finger protein 712                                                | Zfp712        |  |
| 1440779_s_at | 1.10108 | "solute carrier family 5 (sodium/glucose cotransporter), member 9"     | Slc5a9        |  |
| 1440780_x_at | 0.83708 | RIKEN cDNA 1500015O10 gene                                             | 1500015O10Rik |  |
| 1440781_at   | 2.10805 | RIKEN cDNA B830007D08 gene                                             | B830007D08Rik |  |
| 1440782_at   | 1.04522 | src family associated phosphoprotein 1                                 | Scap1         |  |
| 1440783_at   | 0.91892 | RIKEN cDNA 4930529M08 gene                                             | 4930529M08Rik |  |
| 1440784_at   | 0.87576 | Eukaryotic translation elongation factor 2                             | Eef2          |  |
| 1440785_at   | 0.85488 | relaxin/insulin-like family peptide receptor 1                         | Rxfp1         |  |
| 1440786_x_at | 0.88323 | Sideroflexin 2                                                         | Sfxn2         |  |
| 1440787_s_at | 0.87080 | Bardet-Biedl syndrome 10 (human)                                       | Bbs10         |  |
| 1440788_at   | 0.98904 | Growth arrest specific 8                                               | Gas8          |  |
| 1440789_at   | 1.57314 | neogenin                                                               | Neo1          |  |
| 1440790_x_at | 0.98022 | RIKEN cDNA 5033414K04 gene                                             | 5033414K04Rik |  |
| 1440791_x_at | 0.99689 | "transcription elongation factor A (SII), 2"                           | Tcea2         |  |
| 1440792_x_at | 1.07254 | "opioid receptor, sigma 1"                                             | Oprs1         |  |
| 1440793_at   | 1.04824 | RIKEN cDNA 1700029M03 gene                                             | 1700029M03Rik |  |
| 1440794_x_at | 1.00734 | RIKEN cDNA 1700029M03 gene                                             | 1700029M03Rik |  |
| 1440795_x_at | 1.03498 | "rabaptin, RAB GTPase binding effector protein 2"                      | Rabep2        |  |
| 1440796_at   | 1.39723 | RIKEN cDNA A330021E22 gene                                             | A330021E22Rik |  |
| 1440797_at   | 0.94223 | Dlx6 opposite strand transcript 2                                      | Dlx6os2       |  |
| 1440798_x_at | 1.00391 | Leucine rich repeat containing 6 (testis)                              | Lrrc6         |  |
| 1440799_s_at | 0.81166 | "FERM, RhoGEF and pleckstrin domain protein 2"                         | Farp2         |  |
| 1440800_at   | 0.85874 | hypothetical protein LOC665193                                         | LOC665193     |  |
| 1440801_s_at | 1.05421 | "adrenergic receptor kinase, beta 2"                                   | Adrbk2        |  |
| 1440802_at   | 1.07835 | CLIP associating protein 2                                             | Clasp2        |  |
| 1440803_x_at | 0.93787 | tachykinin receptor 3                                                  | Tacr3         |  |
| 1440804_at   | 1.12256 | natural killer tumor recognition sequence                              | Nktr          |  |
| 1440805_at   | 0.99861 | ---                                                                    | ---           |  |
| 1440806_x_at | 1.04156 | RIKEN cDNA 5730526G10 gene                                             | 5730526G10Rik |  |
| 1440807_at   | 1.16917 | "Membrane associated guanylate kinase, WW and PDZ domain containing 2" |               |  |



## Magi2

1440808\_x\_at 1.09885 RIKEN cDNA E430002D04 gene E430002D04Rik  
 1440809\_at 0.96446 SWA-70 protein Swap70  
 1440810\_x\_at 1.06732 "PREDICTED: Mus musculus similar to ribosomal protein L27a  
 (LOC628200), mRNA" ---  
 1440811\_x\_at 1.12731 "CD8 antigen, alpha chain" Cd8a  
 1440812\_at 0.97098 Transcribed locus ---  
 1440813\_s\_at 1.05842 plexin B3 Plxnb3  
 1440814\_x\_at 0.96779 heparan sulfate (glucosamine) 3-O-sulfotransferase 2 Hs3st2  
 1440815\_x\_at 1.09445 hypothetical protein LOC624112 LOC624112  
 1440816\_x\_at 0.96997 DEAD (Asp-Glu-Ala-Asp) box polypeptide 1 Ddx1  
 1440817\_x\_at 0.92891 RIKEN cDNA G630024C07 gene G630024C07Rik  
 1440818\_s\_at 0.98982 "splicing factor 3b, subunit 1" Sf3b1  
 1440819\_s\_at 1.14074 cDNA sequence BC059842 BC059842  
 1440820\_x\_at 0.93925 transmembrane and coiled-coil domains 2 Tmco2  
 1440821\_x\_at 0.95034 outer dense fiber of sperm tails 1 Odf1  
 1440822\_x\_at 0.96770 RalBP1 associated Eps domain containing protein Repl1  
 1440823\_x\_at 0.99656 RIKEN cDNA D130058I21 gene D130058I21Rik  
 1440824\_at 1.24834 F-box protein 45 Fbxo45  
 1440825\_s\_at 0.85762 coiled-coil domain containing 28A Ccdc28a  
 1440826\_s\_at 1.01095 transmembrane protein 103 Tmem103  
 1440827\_x\_at 0.93074 SRY-box containing gene 5 Sox5  
 1440828\_x\_at 1.04891 PHD finger protein 7 Phf7  
 1440829\_x\_at 0.91376 "tubulin tyrosine ligase-like family, member 11" Ttll11  
 1440830\_at 0.95403 G protein-coupled receptor 116 Gpr116  
 1440831\_at 1.02773 BTB and CNC homology 1 Bach1  
 1440832\_at 0.97221 "angiogenin, ribonuclease A family, member 4" Ang4  
 1440833\_at 0.83789 cell division cycle 2-like 5 (cholinesterase-related cell division controller)  
 Cdc215  
 1440834\_at 1.03371 "solute carrier family 5 (sodium/glucose cotransporter), member 10" Slc5a10  
 1440835\_at 1.00800 zinc finger protein 27 Zfp27  
 1440836\_at 0.96132 SET domain containing 1B Setd1b  
 1440837\_at 1.02327 "histocompatibility 2, O region beta locus" H2-Ob  
 1440838\_at 1.08843 Expressed sequence AI852064 AI852064  
 1440839\_x\_at 1.02890 RIKEN cDNA 1700065I16 gene 1700065I16Rik  
 1440840\_at 0.94655 RIKEN cDNA D630004K10 gene D630004K10Rik  
 1440841\_at 3.04281 "Tyrosine 3-monooxygenase/tryptophan 5-monooxygenase activation protein,  
 epsilon polypeptide" Ywhae  
 1440842\_at 0.92819 RIKEN cDNA C230085N15 gene C230085N15Rik  
 1440843\_at 1.00932 RIKEN cDNA A230051N06 gene A230051N06Rik  
 1440844\_at 0.89623 transducer of ErbB-2.1 Tob1  
 1440845\_at 0.99648 RIKEN cDNA E030031F02 gene E030031F02Rik  
 1440846\_at 0.86285 RIKEN cDNA A930041I02 gene A930041I02Rik

1440847\_at 2.03535 metastasis suppressor 1 Mtss1  
1440848\_at 1.17893 RIKEN cDNA 1110028C15 gene 1110028C15Rik  
1440849\_at 1.04092 RIKEN cDNA 6330417G04 gene 6330417G04Rik  
1440850\_at 1.21959 ring finger protein 12 Rnf12  
1440851\_at 1.15258 RIKEN cDNA 4933407N01 gene 4933407N01Rik  
1440852\_at 0.99060 RIKEN cDNA 4833405L16 gene 4833405L16Rik  
1440853\_at 1.13054 "ras homolog gene family, member T1" Rhot1  
1440854\_at 1.45811 RIKEN cDNA 2810403A07 gene 2810403A07Rik  
1440855\_at 0.96387 "Machado-Joseph disease (spinocerebellar ataxia 3, olivopontocerebellar ataxia 3, autosomal dominant, ataxin 3) homolog (human)" Mjd  
1440856\_at 0.81821 mitogen activated protein kinase 8 Mapk8  
1440857\_at 0.86985 "carbamoyl-phosphate synthetase 2, aspartate transcarbamylase, and dihydroorotase" Cad  
1440858\_at 1.00664 "Cdc2-related kinase, arginine/serine-rich" Crkrs  
1440859\_at 1.01155 A kinase (PRKA) anchor protein 6 Akap6  
1440860\_at 1.09333 mab-21-like 1 (C. elegans) Mab21l1  
1440861\_a\_at 1.01184 --- ---  
1440862\_at 0.97682 G protein-coupled receptor 178 Gpr178  
1440863\_at 0.98406 --- ---  
1440864\_at 1.04994 expressed sequence AI836737 AI836737  
1440865\_at 1.06101 interferon induced transmembrane protein 6 Ifitm6  
1440866\_at 1.22137 eukaryotic translation initiation factor 2-alpha kinase 2 Eif2ak2  
1440867\_at 0.98768 sprouty homolog 4 (Drosophila) Spry4  
1440868\_at 0.80892 "GA repeat binding protein, beta 2" Gabpb2  
1440869\_x\_at 0.83153 RIKEN cDNA 6720489N17 gene 6720489N17Rik  
1440870\_at 1.04429 PR domain containing 16 Prdm16  
1440871\_at 1.02036 "membrane associated guanylate kinase, WW and PDZ domain containing 1" Magi1  
1440872\_at 1.09230 CDNA sequence BC010304 BC010304  
1440873\_at 0.85840 --- ---  
1440874\_at 1.00302 "solute carrier organic anion transporter family, member 5A1" Slco5a1  
1440875\_a\_at 1.28325 radical S-adenosyl methionine domain containing 1 Rsad1  
1440876\_at 1.01088 Retinitis pigmentosa 9 homolog (human) Rp9h  
1440877\_at 0.97327 Fibroblast growth factor receptor substrate 2 Frs2  
1440878\_at 0.97885 runt related transcription factor 1 Runx1  
1440879\_at 0.97811 ATP-binding cassette transporter sub-family A member 9 Abca9  
1440880\_at 0.85454 metallophosphoesterase 1 Mppe1  
1440881\_at 1.06063 bromodomain and WD repeat domain containing 3 Brwd3  
1440882\_at 1.34806 "low density lipoprotein receptor-related protein 8, apolipoprotein e receptor" Lrp8  
1440883\_at 1.32320 Transcribed locus ---  
1440884\_s\_at 1.28282 RIKEN cDNA A530047J11 gene A530047J11Rik  
1440885\_at 1.29516 Ena-vasodilator stimulated phosphoprotein Evl

1440886\_at 0.90878 cell division cycle 37 homolog (S. cerevisiae)-like 1 Cdc3711  
1440887\_at 0.96345 RIKEN cDNA C330005M16 gene C330005M16Rik  
1440888\_at 0.92944 oxytocin receptor Oxt  
1440889\_at 0.97159 cDNA sequence BC006965 BC006965  
1440890\_a\_at 1.01932 expressed sequence BB114266 BB114266  
1440891\_at 0.98766 "glutamate receptor, ionotropic, AMPA4 (alpha 4)" Gria4  
1440892\_at 1.49503 CDNA sequence BC017647 BC017647  
1440893\_at 1.09595 --- ---  
1440894\_at 1.06877 "similar to CG4050-PA, isoform A" LOC670793  
1440895\_at 0.95670 --- ---  
1440896\_at 1.16129 "Superoxide dismutase 1, soluble" Sod1  
1440897\_at 1.01391 "Mus musculus, clone IMAGE:4458738, mRNA" ---  
1440898\_at 0.91402 RIKEN cDNA 4632412N22 gene 4632412N22Rik  
1440899\_at 1.06396 flavin containing monooxygenase 5 Fmo5  
1440900\_at 0.87480 G protein-coupled receptor 174 Gpr174  
1440901\_at 1.04703 "diacylglycerol kinase, beta" Dgkb  
1440902\_at 0.93096 RIKEN cDNA A330104H05 gene A330104H05Rik  
1440903\_at 1.26111 Hect (homologous to the E6-AP (UBE3A) carboxyl terminus) domain and  
RCC1 (CHC1)-like domain (RLD) 1 Herc1  
1440904\_at 0.98415 SUMO/sentrin specific peptidase 5 Senp5  
1440905\_at 2.09451 Heparan sulfate 2-O-sulfotransferase 1 Hs2st1  
1440906\_at 1.11106 B-cell CLL/lymphoma 7C Bcl7c  
1440907\_at 0.99718 RIKEN cDNA A130038H09 gene A130038H09Rik  
1440908\_at 0.97859 hypothetical protein D030063E12 D030063E12  
1440909\_at 0.88720 "immunity-related GTPase family, cinema 1" Irgc1  
1440910\_at 0.92593 CDNA clone IMAGE:5252333 ---  
1440911\_at 0.93250 "procollagen, type XXIII, alpha 1" Col23a1  
1440912\_at 0.93688 ring finger protein 39 Rnf39  
1440913\_at 1.12424 cDNA sequence BC037704 BC037704  
1440914\_s\_at 1.09285 aftiphilin Aftph  
1440915\_at 1.11591 M-phase phosphoprotein 9 Mphosph9  
1440916\_at 0.98832 RIKEN cDNA 2510049J12 gene 2510049J12Rik  
1440917\_at 1.09235 RIKEN cDNA 2900093K20 gene 2900093K20Rik  
1440918\_at 0.95275 --- ---  
1440919\_at 0.91175 "MOB1, Mps One Binder kinase activator-like 2C (yeast)" Mobk12c  
1440920\_at 0.85602 Transcribed locus ---  
1440921\_at 1.01948 "NACHT, LRR and PYD containing protein 12" Nalp12  
1440922\_at 0.93691 RIKEN cDNA 9130208D14 gene 9130208D14Rik  
1440923\_at 0.82992 --- ---  
1440924\_at 1.04554 M-phase phosphoprotein 1 Mphosph1  
1440925\_at 1.63343 --- ---  
1440926\_at 1.16294 FMS-like tyrosine kinase 1 Flt1  
1440927\_x\_at 1.08512 RIKEN cDNA A330102K04 gene A330102K04Rik

1440928\_at 0.88099 RIKEN cDNA D630037F22 gene D630037F22Rik  
1440929\_at 1.03044 --- ---  
1440930\_a\_at 1.02844 "scratch homolog 2, zinc finger protein (Drosophila)" Scrt2  
1440931\_at 0.87666 "scratch homolog 2, zinc finger protein (Drosophila)" Scrt2  
1440932\_at 0.99213 --- ---  
1440933\_at 1.00144 RIKEN cDNA 4732460I02 gene 4732460I02Rik  
1440934\_at 0.82498 expressed sequence AW742931 AW742931  
1440935\_at 1.02298 Growth factor receptor bound protein 10 Grb10  
1440936\_at 1.04366 serine active site containing 1 Serac1  
1440937\_at 0.90906 RNA binding motif protein 41 Rbm41  
1440938\_at 0.99625 triggering receptor expressed on myeloid cells-like 2 Trem12  
1440939\_at 0.96984 Septin 6 6-Sep  
1440940\_at 1.01284 "Calcium channel, voltage-dependent, beta 1 subunit" Cacnb1  
1440941\_at 0.97293 hypothetical LOC552912 LOC552912  
1440942\_at 0.96581 "dapper homolog 2, antagonist of beta-catenin (xenopus)" Dact2  
1440943\_at 1.13946 RIKEN cDNA B230208H17 gene B230208H17Rik  
1440944\_at 1.01993 ankyrin repeat and sterile alpha motif domain containing 1B /// similar to AIDA-1b Anks1b /// LOC544718  
1440945\_at 0.89926 --- ---  
1440946\_at 1.02164 Zinc finger protein 483 Zfp483  
1440947\_at 0.93236 BAT2 domain containing 1 Bat2d  
1440948\_at 1.83560 Fyn-related kinase Frk  
1440949\_at 0.97573 --- ---  
1440950\_at 1.05504 Thymoma viral proto-oncogene 1 Akt1  
1440951\_x\_at 0.95355 Wings apart-like homolog (Drosophila) Wapal  
1440952\_at 1.06208 MAD homolog 7 (Drosophila) Smad7  
1440953\_at 0.95079 RIKEN cDNA 1700096K18 gene 1700096K18Rik  
1440954\_at 3.32849 Pre B-cell leukemia transcription factor 1 Pbx1  
1440955\_at 1.00944 cysteine rich BMP regulator 2 (chordin like) Crim2  
1440956\_at 1.17220 coiled-coil domain containing 94 Ccdc94  
1440957\_at 1.00994 defensin beta 29 Defb29  
1440958\_at 1.00699 --- ---  
1440959\_s\_at 0.91992 myoneurin Mynn  
1440960\_at 0.89984 "3 days neonate thymus cDNA, RIKEN full-length enriched library, clone: A630060L04 product:unclassifiable, full insert sequence" ---  
1440961\_at 0.86751 RIKEN cDNA 9130604C24 gene 9130604C24Rik  
1440962\_at 1.02239 "solute carrier family 8 (sodium/calcium exchanger), member 3" Slc8a3  
1440963\_at 0.64084 expressed sequence AI465270 AI465270  
1440964\_s\_at 0.71864 expressed sequence AI465270 AI465270  
1440965\_at 0.96314 "Phosphatidylinositol glycan, class L" Pigl  
1440966\_at 1.63558 membrane-associated ring finger (C3HC4) 7 7-Mar  
1440967\_at 1.17592 Brain protein I3 /// BAI1-associated protein 2-like 1 Bri3 /// Baiap211  
1440968\_at 0.86610 --- ---

1440969\_at 0.87856 cDNA sequence BC030308 BC030308  
 1440970\_at 0.92219 Transcribed locus ---  
 1440971\_x\_at 0.92948 RIKEN cDNA G630024C07 gene G630024C07Rik  
 1440972\_at 1.01206 nuclear receptor-binding SET-domain protein 1 Nsd1  
 1440973\_at 0.94154 hypothetical LOC552874 LOC552874  
 1440974\_at 1.38087 RIKEN cDNA 9030203C11 gene 9030203C11Rik  
 1440975\_at 0.95312 RIKEN cDNA 1810057P16 gene 1810057P16Rik  
 1440976\_at 0.91741 RIKEN cDNA 1110035M17 gene 1110035M17Rik  
 1440977\_at 1.14860 A kinase (PRKA) anchor protein 13 Akap13  
 1440978\_at 0.86266 RIKEN cDNA C920011G20 gene C920011G20Rik  
 1440979\_at 0.98537 Insulin-like growth factor 2 receptor Igf2r  
 1440980\_at 1.10891 "potassium voltage-gated channel, subfamily H (eag-related), member 8" Kcnh8  
 1440981\_at 1.03834 p21 (CDKN1A)-activated kinase 7 Pak7  
 1440982\_at 1.56210 hypothetical LOC552909 LOC552909  
 1440983\_at 1.07075 Tetratricopeptide repeat domain 15 Ttc15  
 1440984\_at 0.71452 "bromodomain adjacent to zinc finger domain, 2B" Baz2b  
 1440985\_at 2.09516 RIKEN cDNA D130023J23 gene D130023J23Rik  
 1440986\_at 1.14319 RNA polymerase II associated protein 1 Rpap1  
 1440987\_at 0.81187 --- ---  
 1440988\_at 1.05032 "9.5 days embryo parthenogenote cDNA, RIKEN full-length enriched library, clone:B130035E07 product:unclassifiable, full insert sequence" ---  
 1440989\_at 0.91957 --- ---  
 1440990\_at 0.90983 cDNA sequence BC056349 BC056349  
 1440991\_at 1.02666 "pleckstrin homology domain containing, family G (with RhoGef domain) member 1" Plekhg1  
 1440992\_at 0.85367 RIKEN cDNA 3110052M02 gene 3110052M02Rik  
 1440993\_at 1.02047 Expressed sequence AW111846 AW111846  
 1440994\_at 0.96123 SNF2 histone linker PHD RING helicase Shprh  
 1440995\_at 0.97041 RIKEN cDNA 6430531B16 gene 6430531B16Rik  
 1440996\_at 1.14989 "Neural precursor cell expressed, developmentally down-regulated gene 8" Nedd8  
 1440997\_at 1.08694 trinucleotide repeat containing 6C Tnrc6c  
 1440998\_at 1.22814 RIKEN cDNA 2310021P13 gene 2310021P13Rik  
 1440999\_at 1.18611 zinc finger protein 697 Zfp697  
 1441000\_at 1.04608 "PREDICTED: Mus musculus similar to T-cell immunoglobulin and mucin domain containing 2 (LOC237749), mRNA" ---  
 1441001\_at 1.47376 expressed sequence AI225934 AI225934  
 1441002\_at 1.00388 "processing of precursor 1, ribonuclease P/MRP family, (S. cerevisiae)" Pop1  
 1441003\_at 0.86368 "excision repair cross-complementing rodent repair deficiency, complementation group 4" Ercc4  
 1441004\_at 0.84255 Exosome component 4 Exosc4  
 1441005\_at 0.97974 RIKEN cDNA 2610304G08 gene 2610304G08Rik  
 1441006\_at 0.95743 dihydrouridine synthase 4-like (S. cerevisiae) Dus4l

1441007\_at 1.17949 RIKEN cDNA A330102I10 gene A330102I10Rik  
 1441008\_at 0.96874 dymeclin Dym  
 1441009\_at 0.94760 RIKEN cDNA 4732491K20 gene 4732491K20Rik  
 1441010\_at 0.83694 "Adult male vesicular gland cDNA, RIKEN full-length enriched library, clone:  
 G630068J03 product:unclassifiable, full insert sequence" ---  
 1441011\_at 1.08093 Transcribed locus ---  
 1441012\_at 1.02617 Huntingtin interacting protein 2 Hip2  
 1441013\_at 1.27924 expressed sequence C81521 C81521  
 1441014\_at 0.97035 Alpha thalassemia/mental retardation syndrome X-linked homolog (human)  
 Atrx  
 1441015\_at 1.04075 Fucosyltransferase 8 Fut8  
 1441016\_at 0.93874 "Adult male corpora quadrigemina cDNA, RIKEN full-length enriched library,  
 clone:B230340D10 product:unclassifiable, full insert sequence" ---  
 1441017\_at 1.31410 "zinc finger, CCHC domain containing 14" Zcchc14  
 1441018\_at 1.07365 ubiquitin specific peptidase 24 Usp24  
 1441019\_at 1.10797 F-box only protein 3 Fbxo3  
 1441020\_at 1.27682 RIKEN cDNA 2900056M20 gene 2900056M20Rik  
 1441021\_at 1.03918 LETM1 domain containing 1 Letmd1  
 1441022\_at 0.96025 ariadne ubiquitin-conjugating enzyme E2 binding protein homolog 1  
 (Drosophila) Arih1  
 1441023\_at 1.39265 "eukaryotic translation initiation factor 2, subunit 2 (beta)" Eif2s2  
 1441024\_at 0.97917 stromal interaction molecule 2 Stim2  
 1441025\_at 1.11526 RIKEN cDNA 3110047P20 gene 3110047P20Rik  
 1441026\_at 1.02864 "poly (ADP-ribose) polymerase family, member 4" Parp4  
 1441027\_at 0.88263 Transcribed locus ---  
 1441028\_at 1.01157 "DNA segment, Chr 2, ERATO Doi 210, expressed" D2Ertd210e  
 1441029\_at 1.21704 Axin 1 Axin1  
 1441030\_at 2.75005 retinoic acid induced 14 Rai14  
 1441031\_at 1.20080 "peptidyl arginine deiminase, type I" Padi1  
 1441032\_at 0.97555 "Adult male liver tumor cDNA, RIKEN full-length enriched library, clone:  
 C730040K02 product:hypothetical protein, full insert sequence" ---  
 1441033\_at 0.98792 transmembrane and tetratricopeptide repeat containing 2 Tmtc2  
 1441034\_at 1.00153 Intersectin 1 (SH3 domain protein 1A) Itsn1  
 1441035\_at 1.02743 "potassium voltage-gated channel, Isk-related subfamily, member 1" Kcne1  
 1441036\_at 0.93139 --- ---  
 1441037\_at 1.02243 "Synuclein, alpha interacting protein (synphilin)" Sncap  
 1441038\_at 1.89278 Utrophin Utrn  
 1441039\_at 0.95760 RIKEN cDNA 4930532J02 gene 4930532J02Rik  
 1441040\_at 1.05289 Kruppel-like factor 12 Klf12  
 1441041\_at 1.08461 Zinc finger protein 746 Zfp746  
 1441042\_at 0.98966 fibroblast growth factor 1 Fgf1  
 1441043\_at 0.87985 "Adult male testis cDNA, RIKEN full-length enriched library,  
 clone:4930579G14 product:unclassifiable, full insert sequence" ---

|              |         |                                                                                                                                |               |
|--------------|---------|--------------------------------------------------------------------------------------------------------------------------------|---------------|
| 1441044_at   | 1.04595 | RIKEN cDNA C130002M15 gene                                                                                                     | C130002M15Rik |
| 1441045_at   | 0.91905 | ---                                                                                                                            | ---           |
| 1441046_at   | 1.21825 | ---                                                                                                                            | ---           |
| 1441047_at   | 0.93819 | "solute carrier family 45, member 4"                                                                                           | Slc45a4       |
| 1441048_at   | 0.92337 | RIKEN cDNA 5930430L01 gene                                                                                                     | 5930430L01Rik |
| 1441049_at   | 0.86770 | "potassium voltage-gated channel, shaker-related, subfamily, member 6"                                                         | Kcna6         |
| 1441050_at   | 2.24202 | "Striatin, calmodulin binding protein 3"                                                                                       | Strn3         |
| 1441051_at   | 0.92591 | tripartite motif protein 27                                                                                                    | Trim27        |
| 1441052_at   | 1.06495 | RIKEN cDNA 2310035C23 gene                                                                                                     | 2310035C23Rik |
| 1441053_at   | 0.96067 | Transcribed locus                                                                                                              | ---           |
| 1441054_at   | 1.12446 | "apolipoprotein L, 2"                                                                                                          | Apol2         |
| 1441055_at   | 0.98097 | paralemmin 2                                                                                                                   | Palm2         |
| 1441056_at   | 1.34720 | ubiquitin specific peptidase 3                                                                                                 | Usp3          |
| 1441057_at   | 1.34840 | "Myosin, heavy polypeptide 10, non-muscle"                                                                                     | Myh10         |
| 1441058_at   | 1.22221 | "inositol 1,4,5-trisphosphate 3-kinase B"                                                                                      | Itpkb         |
| 1441059_at   | 0.97498 | RIKEN cDNA 1700049G17 gene                                                                                                     | 1700049G17Rik |
| 1441060_at   | 0.93783 | RIKEN cDNA 2900052L18 gene                                                                                                     | 2900052L18Rik |
| 1441061_at   | 1.08615 | "Visual cortex cDNA, RIKEN full-length enriched library, clone:K530018N01 product:unclassifiable, full insert sequence"        | ---           |
| 1441062_at   | 1.03791 | "DEAD/H (Asp-Glu-Ala-Asp/His) box polypeptide 11 (CHL1-like helicase homolog, <i>S. cerevisiae</i> )"                          | Ddx11         |
| 1441063_at   | 1.14021 | "eukaryotic translation initiation factor 2C, 3"                                                                               | Eif2c3        |
| 1441064_at   | 0.94696 | RIKEN cDNA E330039K12 gene                                                                                                     | E330039K12Rik |
| 1441065_at   | 0.99535 | ---                                                                                                                            | ---           |
| 1441066_at   | 0.93481 | "16 days embryo head cDNA, RIKEN full-length enriched library, clone: C130061K19 product:unclassifiable, full insert sequence" | ---           |
| 1441067_at   | 0.90850 | Expressed sequence AL033314                                                                                                    | AL033314      |
| 1441068_at   | 1.02297 | RIKEN cDNA A130001G05 gene                                                                                                     | A130001G05Rik |
| 1441069_at   | 0.82499 | "zinc finger, DHHC domain containing 23"                                                                                       | Zdhhc23       |
| 1441070_at   | 0.96268 | Homeo box A3                                                                                                                   | Hoxa3         |
| 1441071_at   | 0.93806 | "potassium voltage-gated channel, subfamily Q, member 5"                                                                       | Kcnq5         |
| 1441072_at   | 2.51876 | "CUG triplet repeat, RNA binding protein 2"                                                                                    | Cugbp2        |
| 1441073_at   | 0.94834 | ---                                                                                                                            | ---           |
| 1441074_at   | 0.99300 | Ewing sarcoma breakpoint region 1                                                                                              | Ewsr1         |
| 1441075_at   | 1.10201 | nitric oxide synthase trafficker                                                                                               | Nostrin       |
| 1441076_at   | 1.10743 | Transcribed locus                                                                                                              | ---           |
| 1441077_at   | 1.15278 | expressed sequence AW124847                                                                                                    | AW124847      |
| 1441078_at   | 0.90602 | RIKEN cDNA 1700023F02 gene                                                                                                     | 1700023F02Rik |
| 1441079_at   | 1.02102 | Transcribed locus                                                                                                              | ---           |
| 1441080_at   | 0.85457 | Transcribed locus                                                                                                              | ---           |
| 1441081_a_at | 1.08711 | RIKEN cDNA 1110038B12 gene                                                                                                     | 1110038B12Rik |
| 1441082_at   | 0.88956 | Down syndrome cell adhesion molecule                                                                                           | Dscam         |
| 1441083_at   | 1.05805 | cleft lip and palate associated transmembrane protein 1                                                                        | Clptm1        |

1441084\_at 0.99023 expressed sequence BE686333 BE686333  
1441085\_at 0.93122 RAR-related orphan receptor alpha Rora  
1441086\_at 0.88156 RIKEN cDNA 4930451I11 gene 4930451I11Rik  
1441087\_at 0.91416 RIKEN cDNA 2810011L19 gene 2810011L19Rik  
1441088\_at 0.97915 "zinc finger protein, subfamily 1A, 3 (Aiolos)" Zfpn1a3  
1441089\_at 1.30090 "eukaryotic translation initiation factor 2C, 3" Eif2c3  
1441090\_at 1.01975 Nuclear mitotic apparatus protein 1 Numal  
1441091\_at 1.00168 Transcribed locus ---  
1441092\_at 1.09066 RIKEN cDNA 9330159M07 gene 9330159M07Rik  
1441093\_at 1.16357 --- ---  
1441094\_at 0.95501 alcohol dehydrogenase 6B (class V) Adh6b  
1441095\_at 0.95777 RIKEN cDNA A430041B07 gene A430041B07Rik  
1441096\_at 1.03283 tumor suppressor candidate 5 Tusc5  
1441097\_at 0.94363 Transcribed locus ---  
1441098\_at 1.01760 poly(A)-specific ribonuclease (PARN)-like domain containing 1 Pnlcd1  
1441099\_at 1.03695 "Pleckstrin homology domain containing, family G (with RhoGef domain)  
member 3" Plekhg3  
1441100\_at 2.34890 mbt domain containing 1 Mbtd1  
1441101\_at 0.97720 "HECT, C2 and WW domain containing E3 ubiquitin protein ligase 1"  
Hecw1  
1441102\_at 1.01818 prolactin receptor Prlr  
1441103\_at 1.07871 "DNA segment, Chr 12, ERATO Doi 551, expressed" D12Ertd551e  
1441104\_at 0.93624 myosin Vb Myo5b  
1441105\_at 1.02671 "NOD-derived CD11c +ve dendritic cells cDNA, RIKEN full-length enriched  
library, clone:F630006H17 product:hypothetical protein, full insert sequence" ---  
1441106\_at 1.15380 "zinc finger, AN1-type domain 5" Zfand5  
1441107\_at 0.98796 doublesex and mab-3 related transcription factor like family A2 Dmrta2  
1441108\_at 1.30955 "12 days embryo eyeball cDNA, RIKEN full-length enriched library, clone:  
D230035N06 product:unclassifiable, full insert sequence" ---  
1441109\_at 0.98878 RIKEN cDNA 5430414B12 gene 5430414B12Rik  
1441110\_at 0.91003 leucine rich repeat containing 21 Lrrc21  
1441111\_at 0.94468 "15 days embryo embryonic body below diaphragm cDNA, RIKEN full-length  
enriched library, clone:8230401F05 product:unclassifiable, full insert sequence" ---  
1441112\_at 2.37095 similar to Zinc finger BED domain containing protein 4 /// similar to Zinc finger  
BED domain containing protein 4 /// similar to Zinc finger BED domain containing protein 4  
LOC667118 /// LOC669797 /// LOC675760  
1441113\_at 0.91744 RIKEN cDNA A430071A18 gene A430071A18Rik  
1441114\_at 1.84154 RIKEN cDNA 9330156P08 gene 9330156P08Rik  
1441115\_at 0.97022 "DNA segment, Chr 18, ERATO Doi 232, expressed" D18Ertd232e  
1441116\_at 0.80150 --- ---  
1441117\_at 3.29931 "Ash1 (absent, small, or homeotic)-like (Drosophila)" Ash11  
1441118\_at 0.96549 cDNA sequence BC017647 BC017647  
1441119\_at 1.35477 GTPase activating RANGAP domain-like 1 Garnl1



1441120\_at 1.08743 CEA-related cell adhesion molecule 16 Ceacam16  
1441121\_at 1.30671 PCI domain containing 2 Pcid2  
1441122\_at 0.92414 expressed sequence AU024342 AU024342  
1441123\_at 1.08751 open reading frame 34 ORF34  
1441124\_at 1.09632 "16 days embryo head cDNA, RIKEN full-length enriched library, clone:  
C130032O22 product:unclassifiable, full insert sequence" ---  
1441125\_at 1.24234 SET domain containing 5 Setd5  
1441126\_at 1.12576 "Phenylalanine-tRNA synthetase-like, beta subunit" Farslb  
1441127\_at 0.93451 "12 days embryo spinal ganglion cDNA, RIKEN full-length enriched library,  
clone:D130065D02 product:unclassifiable, full insert sequence" ---  
1441128\_at 1.00941 Renal tumor antigen Rage  
1441129\_at 1.31447 Septin 11 11-Sep  
1441130\_at 1.02698 Transcribed locus ---  
1441131\_at 1.17268 --- ---  
1441132\_at 0.90382 "Adult male liver tumor cDNA, RIKEN full-length enriched library, clone:  
C730010N16 product:unclassifiable, full insert sequence" ---  
1441133\_at 0.83314 Syntaxin 6 Stx6  
1441134\_at 0.91901 RIKEN cDNA 6820424L24 gene 6820424L24Rik  
1441135\_at 1.04333 Zinc finger protein 672 Zfp672  
1441136\_at 0.97337 "7 days neonate cerebellum cDNA, RIKEN full-length enriched library, clone:  
A730055K08 product:unclassifiable, full insert sequence" ---  
1441137\_at 1.00286 bicaudal C homolog 1 (Drosophila) Biccl  
1441138\_at 1.19388 forkhead box N2 Foxn2  
1441139\_at 0.83760 hypothetical protein B330003H21 B330003H21  
1441140\_at 2.10585 --- ---  
1441141\_at 1.36737 RIKEN cDNA C730024G19 gene C730024G19Rik  
1441142\_at 1.02614 RIKEN cDNA 2700081L22 gene 2700081L22Rik  
1441143\_at 0.96862 RIKEN cDNA E130309D14 gene E130309D14Rik  
1441144\_at 1.00600 "arrestin 3, retinal" Arr3  
1441145\_at 3.29511 RIKEN cDNA D030065N23 gene D030065N23Rik  
1441146\_at 0.99997 expressed sequence C76132 C76132  
1441147\_at 1.10736 "DNA segment, Chr 3, ERATO Doi 229, expressed" D3Ertd229e  
1441148\_at 1.13954 Fukuyama type congenital muscular dystrophy homolog (human) Fcmd  
1441149\_at 0.99571 --- ---  
1441150\_x\_at 1.16966 Transcribed locus ---  
1441151\_at 1.16294 expressed sequence AU044157 AU044157  
1441152\_at 2.43917 --- ---  
1441153\_at 1.35048 Utrophin Utn  
1441154\_at 0.87144 Chromodomain helicase DNA binding protein 7 Chd7  
1441155\_at 1.38168 RIKEN cDNA 2810446P07 gene 2810446P07Rik  
1441156\_at 1.14488 "COP9 (constitutive photomorphogenic) homolog, subunit 3 (Arabidopsis  
thaliana)" Cops3  
1441157\_at 1.02863 hypothetical LOC403344 C230006B20

1441158\_at 1.08525 Chimerin (chimaerin) 2 Chn2  
1441159\_at 1.06521 "mediator of RNA polymerase II transcription, subunit 12 homolog (yeast)-like" Med12l  
1441160\_at 0.99597 RIKEN cDNA D330050G23 gene D330050G23Rik  
1441161\_at 1.04095 RIKEN cDNA B230216G23 gene B230216G23Rik  
1441162\_at 1.05277 Rho-associated coiled-coil forming kinase 1 Rock1  
1441163\_at 0.95650 "mediator of RNA polymerase II transcription, subunit 12 homolog (yeast)-like" Med12l  
1441164\_at 0.91124 "Phosphatidylinositol-4-phosphate 5-kinase, type II, beta" Pip5k2b  
1441165\_s\_at 0.93620 calyntenin 2 Clstn2  
1441166\_at 0.94674 RIKEN cDNA A330050F15 gene A330050F15Rik  
1441167\_at 0.93397 Transcribed locus ---  
1441168\_at 0.95929 Interleukin 1 receptor accessory protein-like 2 Il1rapl2  
1441169\_at 0.97931 "UDP-Gal:betaGlcNAc beta 1,4-galactosyltransferase, polypeptide 6" B4galt6  
1441170\_a\_at 0.92050 disabled homolog 2 (Drosophila) interacting protein Dab2ip  
1441171\_at 0.90175 "gene model 1614, (NCBI)" Gm1614  
1441172\_at 1.11097 "AF4/FMR2 family, member 3" Aff3  
1441173\_at 1.02921 RIKEN cDNA 4930451G09 gene 4930451G09Rik  
1441174\_a\_at 1.16326 leishmanolysin-like (metallopeptidase M8 family) Lmln  
1441175\_at 0.96982 Aristaless related homeobox gene (Drosophila) Arx  
1441176\_at 0.96369 --- ---  
1441177\_at 1.78933 --- ---  
1441178\_at 0.84723 DTW domain containing 2 Dtwd2  
1441179\_at 1.00137 RIKEN cDNA 9530020O07 gene 9530020O07Rik  
1441180\_at 0.82697 RIKEN cDNA C330024D21 gene C330024D21Rik  
1441181\_at 0.96352 Transcribed locus ---  
1441182\_at 0.90618 bromodomain and WD repeat domain containing 3 Brwd3  
1441183\_at 1.01153 Jumonji domain containing 2B Jmjd2b  
1441184\_at 0.89074 "Transient receptor potential cation channel, subfamily C, member 4 associated protein" Trpc4ap  
1441185\_at 1.69194 Musashi homolog 2 (Drosophila) Msi2  
1441186\_at 0.91052 sal-like 3 (Drosophila) Sall3  
1441187\_at 1.04252 RIKEN cDNA E330037M01 gene E330037M01Rik  
1441188\_at 1.01686 --- ---  
1441189\_at 0.89626 Transcribed locus ---  
1441190\_at 0.91192 "actin related protein 2/3 complex, subunit 5-like" Arpc5l  
1441191\_at 1.16982 RIKEN cDNA 2810454H06 gene 2810454H06Rik  
1441192\_at 1.48019 selenocysteine lyase Scly  
1441193\_at 1.01671 --- ---  
1441194\_at 1.10060 Neuregulin 3 Nrg3  
1441195\_at 1.26195 RIKEN cDNA 6030487A22 gene 6030487A22Rik  
1441196\_at 1.12105 RIKEN cDNA C230076A16 gene C230076A16Rik

|              |         |                                                                                                                                                          |               |
|--------------|---------|----------------------------------------------------------------------------------------------------------------------------------------------------------|---------------|
| 1441197_at   | 1.11705 | RIKEN cDNA 9530059O14 gene                                                                                                                               | 9530059O14Rik |
| 1441198_at   | 0.92598 | zinc finger protein 39                                                                                                                                   | Zfp39         |
| 1441199_at   | 0.97416 | "Protein tyrosine phosphatase, receptor type, M"                                                                                                         | Ptprm         |
| 1441200_at   | 1.08521 | Kruppel-like factor 3 (basic)                                                                                                                            | Klf3          |
| 1441201_at   | 0.95600 | "Ubiquitously transcribed tetratricopeptide repeat gene, X chromosome"                                                                                   | Utx           |
| 1441202_at   | 0.92814 | RAB GTPase activating protein 1-like                                                                                                                     | Rabgap11      |
| 1441203_at   | 1.01067 | CDNA clone IMAGE:30543871                                                                                                                                | ---           |
| 1441204_at   | 1.12962 | RIKEN cDNA A130019P10 gene                                                                                                                               | A130019P10Rik |
| 1441205_at   | 0.97172 | ---                                                                                                                                                      | ---           |
| 1441206_at   | 1.16969 | synaptopodin 2                                                                                                                                           | Synpo2        |
| 1441207_at   | 0.97101 | RIKEN cDNA 9630041N07 gene                                                                                                                               | 9630041N07Rik |
| 1441208_at   | 0.98356 | Haloacid dehalogenase-like hydrolase domain containing 2                                                                                                 | Hdhd2         |
| 1441209_at   | 1.06715 | Ras and Rab interactor 2                                                                                                                                 | Rin2          |
| 1441210_at   | 0.95301 | Myosin IB                                                                                                                                                | Myo1b         |
| 1441211_at   | 0.92725 | "K+ voltage-gated channel, subfamily S, 2"                                                                                                               | Kcns2         |
| 1441212_at   | 1.13212 | RIKEN cDNA 6720467C03 gene                                                                                                                               | 6720467C03Rik |
| 1441213_at   | 0.95909 | ---                                                                                                                                                      | ---           |
| 1441214_at   | 0.91397 | exophilin 5                                                                                                                                              | Exph5         |
| 1441215_at   | 0.96048 | TraB domain containing                                                                                                                                   | Trabd         |
| 1441216_at   | 0.97990 | RIKEN cDNA 5330418N22 gene                                                                                                                               | 5330418N22Rik |
| 1441217_at   | 1.04973 | RAB GTPase activating protein 1                                                                                                                          | Rabgap1       |
| 1441218_at   | 0.96695 | Tetratricopeptide repeat domain 21A                                                                                                                      | ttc21a        |
| 1441219_at   | 1.09470 | "11 days pregnant adult female ovary and uterus cDNA, RIKEN full-length enriched library, clone:5031405O07 product:unclassifiable, full insert sequence" | ---           |
| 1441220_at   | 0.98759 | ---                                                                                                                                                      | ---           |
| 1441221_at   | 1.24673 | RIKEN cDNA 1700008J07 gene                                                                                                                               | 1700008J07Rik |
| 1441222_x_at | 1.04352 | ---                                                                                                                                                      | ---           |
| 1441223_at   | 0.92910 | membrane-associated ring finger (C3HC4) 4                                                                                                                | 4-Mar         |
| 1441224_at   | 0.94474 | Dystrophin related protein 2                                                                                                                             | Drp2          |
| 1441225_at   | 0.93234 | Gelsolin                                                                                                                                                 | Gsn           |
| 1441226_at   | 0.98674 | "spondin 1, (f-spondin) extracellular matrix protein"                                                                                                    | Spon1         |
| 1441227_at   | 0.95482 | CDNA clone IMAGE:6815954                                                                                                                                 | ---           |
| 1441228_at   | 1.08049 | apolipoprotein L domain containing 1                                                                                                                     | Apold1        |
| 1441229_at   | 1.70293 | RIKEN cDNA D230019N24 gene                                                                                                                               | D230019N24Rik |
| 1441230_at   | 2.07786 | Fibronectin type III domain containing 3B                                                                                                                | Fndc3b        |
| 1441231_at   | 2.12481 | "PREDICTED: Mus musculus hypothetical protein LOC626097 (LOC626097), mRNA"                                                                               | ---           |
| 1441232_at   | 0.96917 | Transcribed locus                                                                                                                                        | ---           |
| 1441233_at   | 1.64009 | Signal recognition particle 54                                                                                                                           | Srp54         |
| 1441234_at   | 0.83782 | ---                                                                                                                                                      | ---           |
| 1441235_at   | 0.86916 | nucleoporin 133                                                                                                                                          | Nup133        |
| 1441236_at   | 1.07797 | "solute carrier family 9 (sodium/hydrogen exchanger), member 3"                                                                                          | Slc9a3        |
| 1441237_at   | 1.08157 | "DNA segment, Chr 5, ERATO Doi 163, expressed"                                                                                                           | D5Erttd163e   |

|              |         |                                                                              |               |
|--------------|---------|------------------------------------------------------------------------------|---------------|
| 1441238_at   | 1.66703 | RIKEN cDNA 9030416H16 gene                                                   | 9030416H16Rik |
| 1441239_at   | 1.11540 | potassium channel tetramerisation domain containing 18                       | Kctd18        |
| 1441240_at   | 1.08455 | Replication protein A1                                                       | Rpa1          |
| 1441241_at   | 0.53763 | RIKEN cDNA 9630013D21 gene                                                   | 9630013D21Rik |
| 1441242_at   | 0.99798 | Dipeptidylpeptidase 4                                                        | Dpp4          |
| 1441243_at   | 0.96565 | Zinc finger protein 532                                                      | Zfp532        |
| 1441244_at   | 0.93865 | Transcribed locus                                                            | ---           |
| 1441245_a_at | 1.01740 | "gene model 632, (NCBI)"                                                     | Gm632         |
| 1441246_s_at | 1.14584 | dihydropyrimidinase-like 5                                                   | Dpysl5        |
| 1441247_at   | 0.91709 | "Phospholipase A2, group III"                                                | Pla2g3        |
| 1441248_at   | 1.95364 | ---                                                                          | ---           |
| 1441249_at   | 1.13585 | RIKEN cDNA 4930403D09 gene                                                   | 4930403D09Rik |
| 1441250_at   | 1.01759 | ---                                                                          | ---           |
| 1441251_a_at | 1.05422 | RIKEN cDNA 2010001A14 gene                                                   | 2010001A14Rik |
| 1441252_at   | 0.85800 | RIKEN cDNA 2010001A14 gene                                                   | 2010001A14Rik |
| 1441253_at   | 2.47363 | "Regulatory factor X, 3 (influences HLA class II expression)"                | Rfx3          |
| 1441254_at   | 0.74450 | RIKEN cDNA 1810008K04 gene                                                   | 1810008K04Rik |
| 1441255_at   | 0.99218 | cadherin 3                                                                   | Cdh3          |
| 1441256_at   | 1.02810 | Wdr45 like                                                                   | Wdr45l        |
| 1441257_x_at | 1.09794 | Wdr45 like                                                                   | Wdr45l        |
| 1441258_at   | 0.89880 | cDNA sequence AF529169                                                       | AF529169      |
| 1441259_s_at | 0.69503 | intraflagellar transport 122 homolog (Chlamydomonas)                         | Ift122        |
| 1441260_a_at | 1.02900 | ---                                                                          | ---           |
| 1441261_at   | 0.89348 | ---                                                                          | ---           |
| 1441262_at   | 2.18488 | STE20-like kinase (yeast)                                                    | Slk           |
| 1441263_a_at | 1.07125 | RIKEN cDNA A930005H10 gene                                                   | A930005H10Rik |
| 1441264_x_at | 1.10971 | RIKEN cDNA A930005H10 gene                                                   | A930005H10Rik |
| 1441265_at   | 0.87973 | "Pleckstrin homology domain containing, family M (with RUN domain) member 2" | Plekhm2       |
| 1441266_at   | 1.60832 | "Striatin, calmodulin binding protein 3"                                     | Strn3         |
| 1441267_at   | 1.11832 | Arginine/serine-rich coiled-coil 1                                           | Rsrc1         |
| 1441268_at   | 0.88140 | RIKEN cDNA 1500011B03 gene                                                   | 1500011B03Rik |
| 1441269_at   | 1.07824 | Hydrocephalus inducing                                                       | Hydin         |
| 1441270_at   | 1.26070 | A kinase (PRKA) anchor protein 2                                             | Akap2         |
| 1441271_at   | 1.05875 | Isocitrate dehydrogenase 3 (NAD+) beta                                       | Idh3b         |
| 1441272_at   | 1.75585 | ---                                                                          | ---           |
| 1441273_at   | 1.02142 | Leucine-rich repeats and calponin homology (CH) domain containing 2          | Lrch2         |
| 1441274_at   | 1.06309 | Cancer susceptibility candidate 3                                            | Casc3         |
| 1441275_at   | 0.95820 | kelch repeat and BTB (POZ) domain containing 8                               | Kbtbd8        |
| 1441276_at   | 0.99009 | "protein tyrosine phosphatase, receptor type, K"                             | Ptprk         |
| 1441277_s_at | 0.94462 | "protein tyrosine phosphatase, receptor type, K"                             | Ptprk         |
| 1441278_at   | 0.92726 | RIKEN cDNA 4930513N10 gene                                                   | 4930513N10Rik |
| 1441279_at   | 0.94621 | RIKEN cDNA C430002E04 gene                                                   | C430002E04Rik |

1441280\_at 1.01000 "potassium channel, subfamily K, member 12" Kcnk12  
1441281\_s\_at 0.97383 ninjurin 1 Ninj1  
1441282\_at 0.94821 Ssu72 RNA polymerase II CTD phosphatase homolog (yeast) Ssu72  
1441283\_at 0.95695 RIKEN cDNA 5730405I09 gene 5730405I09Rik  
1441284\_at 1.14503 Transcribed locus ---  
1441285\_at 1.08681 RIKEN cDNA 4833426J09 gene 4833426J09Rik  
1441286\_at 1.00022 similar to T-cell receptor alpha chain V region CTL-F3 precursor  
LOC328483  
1441287\_at 1.20992 --- ---  
1441288\_at 1.09533 --- ---  
1441289\_at 0.83847 Transcribed locus ---  
1441290\_at 1.14544 RIKEN cDNA 4930506M07 gene 4930506M07Rik  
1441291\_at 0.92683 v-abl Abelson murine leukemia oncogene 1 Abl1  
1441292\_at 0.96283 Hypothetical gene Rp23-14f5.7 RP23-14F5.7  
1441293\_at 0.95350 "Adult male accessory axillary lymph node cDNA, RIKEN full-length enriched library, clone:G630004G16 product:unclassifiable, full insert sequence" ---  
1441294\_at 1.02496 --- ---  
1441295\_at 0.87997 "lectin, mannose-binding 2-like" Lman2l  
1441296\_at 0.97825 --- ---  
1441297\_at 1.53867 "mucin 6, gastric" Muc6  
1441298\_at 1.05759 --- ---  
1441299\_at 0.99311 Transcribed locus ---  
1441300\_at 0.92689 "potassium voltage-gated channel, subfamily F, member 1" Kcnf1  
1441301\_at 1.04069 Janus kinase and microtubule interacting protein 1 Jakmip1  
1441302\_at 1.14416 --- ---  
1441303\_at 0.94599 --- ---  
1441304\_at 1.06595 ribosomal protein L31 /// similar to ribosomal protein L31  
Rpl31 /// LOC435486 /// LOC544868 /// LOC625917 /// LOC626367 /// LOC631731 /// LOC637860 /// LOC638399 /// LOC667682 /// LOC668409 /// LOC668850 /// LOC671205 /// LOC672957 /// LOC673582 /// LOC676592  
1441305\_at 0.94484 "Adult male corpus striatum cDNA, RIKEN full-length enriched library, clone: C030044L04 product:unclassifiable, full insert sequence" ---  
1441306\_at 0.92493 RIKEN cDNA 6820408C15 gene 6820408C15Rik  
1441307\_at 0.98437 hypothetical protein LOC665891 /// hypothetical protein LOC670335  
LOC665891 /// LOC670335  
1441308\_at 1.00742 myelin-associated oligodendrocytic basic protein Mobp  
1441309\_at 1.07586 "a disintegrin-like and metallopeptidase (reprolysin type) with thrombospondin type 1 motif, 10" Adamts10  
1441310\_at 0.87656 "A disintegrin-like and metallopeptidase (reprolysin type) with thrombospondin

type 1 motif, 15" Adamts15  
 1441311\_at 0.96232 "ribosomal protein S6 kinase, polypeptide 2" Rps6ka2  
 1441312\_at 1.00065 Cyclin M1 Cnnm1  
 1441313\_x\_at 0.93011 LIM homeobox protein 9 Lhx9  
 1441314\_at 1.02651 inner centromere protein Incenp  
 1441315\_s\_at 1.42136 "solute carrier family 19 (thiamine transporter), member 2" Slc19a2  
 1441316\_at 1.00909 similar to wingless related MMTV integration site 8b LOC677060  
 1441317\_x\_at 0.96901 janus kinase and microtubule interacting protein 1 Jakmip1  
 1441318\_at 0.82854 "jumonji, AT rich interactive domain 1A (Rbp2 like)" Jarid1a  
 1441319\_at 1.27461 RNA binding motif protein 5 Rbm5  
 1441320\_a\_at 0.85227 expressed sequence AI413194 AI413194  
 1441321\_at 1.23194 hypothetical LOC552911 LOC552911  
 1441322\_at 1.01266 src family associated phosphoprotein 1 Scap1  
 1441323\_at 1.05308 Transcribed locus ---  
 1441324\_at 1.19373 Zinc finger protein 395 Zfp395  
 1441325\_at 1.07222 NF-kappaB repressing factor Nkrf  
 1441326\_at 0.90212 ceruloplasmin Cp  
 1441327\_a\_at 1.02682 "signal sequence receptor, alpha" Ssr1  
 1441328\_at 0.97735 Phosphatidylinositol binding clathrin assembly protein Picalm  
 1441329\_at 1.13380 galanin receptor 1 Galr1  
 1441330\_at 0.96571 crumbs homolog 1 (Drosophila) Crb1  
 1441331\_at 1.37736 RIKEN cDNA A230061C15 gene A230061C15Rik  
 1441332\_at 1.07627 --- ---  
 1441333\_at 0.94844 Trichorhinophalangeal syndrome I (human) Trps1  
 1441334\_at 1.01737 Transcribed locus ---  
 1441335\_at 0.98629 RIKEN cDNA 4930474N05 gene 4930474N05Rik  
 1441336\_at 0.96502 nuclear protein in testis Nut  
 1441337\_at 1.03918 Transcribed locus ---  
 1441338\_at 0.86250 RIKEN cDNA 5930412G12 gene 5930412G12Rik  
 1441339\_at 0.94970 chromodomain helicase DNA binding protein 9 Chd9  
 1441340\_at 1.10193 centrosomal protein 68 Cep68  
 1441341\_at 0.91889 Transcribed locus ---  
 1441342\_at 0.98590 Dipeptidylpeptidase 4 Dpp4  
 1441343\_at 0.92178 --- ---  
 1441344\_at 1.03992 expressed sequence C80197 C80197  
 1441345\_at 1.12059 expressed sequence C80143 C80143  
 1441346\_at 1.22740 RIKEN cDNA 2810421E14 gene 2810421E14Rik  
 1441347\_at 1.37617 HIV-1 Rev binding protein-like Hrbl  
 1441348\_at 1.56841 "Zinc finger protein 422, related sequence 1" Zfp422-rs1  
 1441349\_at 1.25304 hypothetical LOC552904 LOC552904  
 1441350\_at 1.15388 --- ---  
 1441351\_at 1.56791 Ankyrin repeat and IBR domain containing 1 Ankib1  
 1441352\_at 1.34850 RIKEN cDNA 9430034N14 gene 9430034N14Rik

1441353\_at 0.91895 RIKEN cDNA 5330421F07 gene 5330421F07Rik  
1441354\_at 1.35950 expressed sequence AU018740 AU018740  
1441355\_at 1.32001 RIKEN cDNA E030047P09 gene E030047P09Rik  
1441356\_at 1.01544 src homology 2 domain-containing transforming protein C2 Shc2  
1441357\_at 0.94118 kin of IRRE like 3 (Drosophila) Kirrel3  
1441358\_at 0.79682 protocadherin beta 16 Pcdhb16  
1441359\_at 2.31409 RIKEN cDNA 9230115F04 gene 9230115F04Rik  
1441360\_at 1.40431 Ribosomal protein S6 kinase polypeptide 3 Rps6ka3  
1441361\_at 1.12013 multiple PDZ domain protein Mpdz  
1441362\_at 1.32393 "Protein tyrosine phosphatase, receptor type, G" Ptpnrg  
1441363\_at 0.95325 --- ---  
1441364\_at 0.92247 GATA binding protein 4 Gata4  
1441365\_at 0.97806 forkhead box P2 Foxp2  
1441366\_at 1.02790 --- ---  
1441367\_a\_at 1.06488 Transcribed locus ---  
1441368\_at 0.93094 "12 days embryo embryonic body between diaphragm region and neck cDNA,  
RIKEN full-length enriched library, clone:9430084D06 product:unclassifiable, full insert sequence"  
---  
1441369\_at 0.95482 RIKEN cDNA C030017B01 gene C030017B01Rik  
1441370\_at 1.43465 "H2A histone family, member Z" H2afz  
1441371\_at 0.99376 plexin A4 Plxna4  
1441372\_at 0.90228 RIKEN cDNA 5930405F01 gene 5930405F01Rik  
1441373\_at 1.03921 Musashi homolog 2 (Drosophila) Msi2  
1441374\_at 0.98992 expressed sequence C79798 C79798  
1441375\_at 1.36277 Leucine-rich repeats and immunoglobulin-like domains 1 Lrig1  
1441376\_at 1.15450 gamma-aminobutyric acid (GABA-A) receptor-associated protein-like 2  
Gabarapl2  
1441377\_at 1.07682 kinesin family member 6 Kif6  
1441378\_at 0.97170 --- ---  
1441379\_at 0.99100 expressed sequence AU045094 AU045094  
1441380\_at 0.97221 RIKEN cDNA 2810439F02 gene 2810439F02Rik  
1441381\_at 0.99276 RIKEN cDNA 9430029E18 gene 9430029E18Rik  
1441382\_at 1.00251 G protein-coupled receptor 101 Gpr101  
1441383\_at 1.16110 RIKEN cDNA 1500002O10 gene 1500002O10Rik  
1441384\_at 1.01826 Transcribed locus ---  
1441385\_at 0.88399 "ras homolog gene family, member H" Rhoh  
1441386\_at 1.86338 Rap guanine nucleotide exchange factor (GEF) 1 Rapgef1  
1441387\_at 1.14811 cDNA sequence BC030343 BC030343  
1441388\_at 1.11759 "Adult male hippocampus cDNA, RIKEN full-length enriched library, clone:  
C630020O05 product:unclassifiable, full insert sequence" ---  
1441389\_at 0.93517 Transcribed locus ---  
1441390\_at 0.87157 speedy homolog A (Drosophila) Spdya  
1441391\_at 0.89985 "Guanine nucleotide binding protein (G protein), beta polypeptide 1-like"

## Gnb11

|              |         |                                                                                                                                   |               |
|--------------|---------|-----------------------------------------------------------------------------------------------------------------------------------|---------------|
| 1441392_at   | 0.94608 | Transcribed locus                                                                                                                 | ---           |
| 1441393_at   | 0.94679 | ---                                                                                                                               | ---           |
| 1441394_at   | 1.06477 | expressed sequence C76554                                                                                                         | C76554        |
| 1441395_at   | 1.00156 | ---                                                                                                                               | ---           |
| 1441396_at   | 0.98114 | "UDP-Gal:betaGlcNAc beta 1,3-galactosyltransferase, polypeptide 1"                                                                |               |
| B3galt1      |         |                                                                                                                                   |               |
| 1441397_at   | 1.44223 | Par-3 (partitioning defective 3) homolog (C. elegans)                                                                             | Pard3         |
| 1441398_at   | 1.04413 | ---                                                                                                                               | ---           |
| 1441399_at   | 0.96955 | ---                                                                                                                               | ---           |
| 1441400_at   | 1.40589 | RIKEN cDNA 1810029B16 gene                                                                                                        | 1810029B16Rik |
| 1441401_at   | 0.92640 | expressed sequence C79329                                                                                                         | C79329        |
| 1441402_at   | 1.17333 | similar to cysteine and glycine-rich protein 2 binding protein                                                                    | LOC674229     |
| 1441403_at   | 1.45120 | RIKEN cDNA 6430501K19 gene                                                                                                        | 6430501K19Rik |
| 1441404_at   | 1.26007 | "Platelet-activating factor acetylhydrolase, isoform 1b, beta1 subunit"                                                           | Pafah1b1      |
| 1441405_at   | 0.91554 | RIKEN cDNA 9630014M24 gene                                                                                                        | 9630014M24Rik |
| 1441406_at   | 1.00589 | ---                                                                                                                               | ---           |
| 1441407_at   | 1.30218 | ROD1 regulator of differentiation 1 (S. pombe)                                                                                    | Rod1          |
| 1441408_at   | 1.10312 | expressed sequence AU044856                                                                                                       | AU044856      |
| 1441409_at   | 0.84376 | Grp94 neighboring nucleotidase variant 4                                                                                          | Gnn           |
| 1441410_at   | 1.53095 | "DNA segment, Chr 2, ERATO Doi 112, expressed"                                                                                    | D2Erttd112e   |
| 1441411_at   | 1.47836 | LIM and senescent cell antigen-like domains 1                                                                                     | Lims1         |
| 1441412_s_at | 0.94334 | tripartite motif-containing 45                                                                                                    | Trim45        |
| 1441413_at   | 1.04878 | Catalase                                                                                                                          | Cat           |
| 1441414_at   | 1.13682 | Eukaryotic translation elongation factor 2                                                                                        | Eef2          |
| 1441415_at   | 1.71300 | "Sprouty-related, EVH1 domain containing 2"                                                                                       | Spred2        |
| 1441416_at   | 1.11227 | "inositol polyphosphate-4-phosphatase, type II"                                                                                   | Inpp4b        |
| 1441417_at   | 1.17198 | "STT3, subunit of the oligosaccharyltransferase complex, homolog A (S. cerevisiae)"                                               | Stt3a         |
| 1441418_at   | 1.00950 | Src family associated phosphoprotein 1                                                                                            | Scap1         |
| 1441419_at   | 1.08768 | RIKEN cDNA 1700030G06 gene                                                                                                        | 1700030G06Rik |
| 1441420_at   | 1.04806 | "immunoglobulin superfamily, member 9"                                                                                            | Igsf9         |
| 1441421_at   | 1.14562 | RIKEN cDNA C530030P08 gene                                                                                                        | C530030P08Rik |
| 1441422_at   | 1.00264 | growth arrest-specific 2 like 1                                                                                                   | Gas2l1        |
| 1441423_at   | 0.93136 | endothelin converting enzyme 1                                                                                                    | Ece1          |
| 1441424_at   | 1.09790 | Mitofusin 2                                                                                                                       | Mfn2          |
| 1441425_at   | 1.01618 | Transcribed locus                                                                                                                 | ---           |
| 1441426_at   | 1.40849 | CDNA sequence BC002230                                                                                                            | BC002230      |
| 1441427_at   | 1.01139 | von Willebrand factor C domain containing 2                                                                                       | Vwc2          |
| 1441428_at   | 1.05751 | "Adult male liver tumor cDNA, RIKEN full-length enriched library, clone: C730003N19 product:unclassifiable, full insert sequence" | ---           |
| 1441429_at   | 1.06731 | insulin receptor substrate 4                                                                                                      | Irs4          |
| 1441430_at   | 1.00137 | Transcribed locus                                                                                                                 | ---           |



|              |         |                                                                                                                                |               |
|--------------|---------|--------------------------------------------------------------------------------------------------------------------------------|---------------|
| 1441431_at   | 0.95986 | RIKEN cDNA 1700041C02 gene                                                                                                     | 1700041C02Rik |
| 1441432_at   | 1.06985 | RIKEN cDNA C820005J03 gene                                                                                                     | C820005J03Rik |
| 1441433_at   | 1.01347 | Transcribed locus                                                                                                              | ---           |
| 1441434_at   | 0.94913 | RIKEN cDNA 2810426N06 gene                                                                                                     | 2810426N06Rik |
| 1441435_at   | 1.97608 | Transducin (beta)-like 1 X-linked                                                                                              | Tbl1x         |
| 1441436_at   | 1.05158 | dual specificity phosphatase 12                                                                                                | Dusp12        |
| 1441437_at   | 2.25442 | "RNA binding motif, single stranded interacting protein 1"                                                                     | Rbms1         |
| 1441438_at   | 1.30377 | glypican 6                                                                                                                     | Gpc6          |
| 1441439_at   | 0.95973 | urocortin 3                                                                                                                    | Ucn3          |
| 1441440_at   | 1.38398 | autophagy-related 4C (yeast)                                                                                                   | Atg4c         |
| 1441441_at   | 1.80985 | RIKEN cDNA 2010007L08 gene                                                                                                     | 2010007L08Rik |
| 1441442_at   | 0.95947 | ---                                                                                                                            | ---           |
| 1441443_at   | 0.84644 | Testis expressed gene 2                                                                                                        | Tex2          |
| 1441444_at   | 1.80317 | Neurobeachin like 1                                                                                                            | Nbeal1        |
| 1441445_at   | 1.16438 | period homolog 3 (Drosophila)                                                                                                  | Per3          |
| 1441446_at   | 1.02144 | ---                                                                                                                            | ---           |
| 1441447_at   | 1.11661 | nucleolar protein 4                                                                                                            | Nol4          |
| 1441448_at   | 1.19802 | Pumilio 2 (Drosophila)                                                                                                         | Pum2          |
| 1441449_at   | 0.95248 | "jumonji, AT rich interactive domain 1C (Rbp2 like)"                                                                           | Jarid1c       |
| 1441450_s_at | 1.40117 | "jumonji, AT rich interactive domain 1C (Rbp2 like)"                                                                           | Jarid1c       |
| 1441451_at   | 0.97701 | bromodomain and WD repeat domain containing 3                                                                                  | Brwd3         |
| 1441452_at   | 1.90202 | "LSM1 homolog, U6 small nuclear RNA associated (S. cerevisiae)"                                                                | Lsm1          |
| 1441453_at   | 0.97907 | RIKEN cDNA 8030453O22 gene                                                                                                     | 8030453O22Rik |
| 1441454_at   | 0.89189 | zinc fingers and homeoboxes 3                                                                                                  | Zhx3          |
| 1441455_at   | 1.10852 | CAMP-regulated phosphoprotein 19                                                                                               | Arpp19        |
| 1441456_at   | 0.97462 | matrix metalloproteinase 24                                                                                                    | Mmp24         |
| 1441457_at   | 1.46392 | ---                                                                                                                            | ---           |
| 1441458_at   | 0.97472 | RAS p21 protein activator 4                                                                                                    | Rasa4         |
| 1441459_at   | 0.99742 | "16 days embryo head cDNA, RIKEN full-length enriched library, clone: C130020A17 product:unclassifiable, full insert sequence" | ---           |
| 1441460_at   | 1.16945 | FGFR1 oncogene partner 2                                                                                                       | Fgfr1op2      |
| 1441461_at   | 1.02662 | FERM domain containing 4A                                                                                                      | Frmd4a        |
| 1441462_at   | 0.90176 | dedicator of cytokinesis 4                                                                                                     | Dock4         |
| 1441463_at   | 1.02805 | ---                                                                                                                            | ---           |
| 1441464_at   | 1.05676 | RIKEN cDNA A630035D09 gene                                                                                                     | A630035D09Rik |
| 1441465_at   | 1.27894 | "CCR4-NOT transcription complex, subunit 3"                                                                                    | Cnot3         |
| 1441466_at   | 1.27375 | "splicing factor, arginine/serine-rich 10 (transformer 2 homolog, Drosophila)"                                                 | Sfrs10        |
| 1441467_at   | 1.75018 | Tetraspanin 5                                                                                                                  | Tspan5        |
| 1441468_at   | 0.93872 | "PREDICTED: Mus musculus similar to dachsous 2 isoform 2 (LOC627094), mRNA"                                                    | ---           |
| 1441469_at   | 1.04569 | dedicator of cytokinesis 4                                                                                                     | Dock4         |
| 1441470_at   | 1.11597 | expressed sequence AV249152                                                                                                    | AV249152      |

1441471\_at 0.88987 RIKEN cDNA 2810002D19 gene 2810002D19Rik  
1441472\_at 1.18324 CDC-like kinase 3 Clk3  
1441473\_at 1.15487 hypothetical protein LOC666775 /// hypothetical protein LOC671556  
LOC666775 /// LOC671556  
1441474\_at 0.94384 RIKEN cDNA C130070B15 gene C130070B15Rik  
1441475\_at 1.51071 PTK2 protein tyrosine kinase 2 Ptk2  
1441476\_at 0.90846 suppressor of cytokine signaling 2 Socs2  
1441477\_at 1.40442 calumenin Calu  
1441478\_at 0.95130 RIKEN cDNA 9930013L23 gene 9930013L23Rik  
1441479\_at 1.83176 "Protein phosphatase 1B, magnesium dependent, beta isoform" Ppm1b  
1441480\_at 1.33689 Signal recognition particle 54 Srp54  
1441481\_at 1.08024 microfibrillar-associated protein 3-like Mfap3l  
1441482\_at 1.09410 --- ---  
1441483\_at 0.85445 "SLIT and NTRK-like family, member 2" Slitrk2  
1441484\_at 1.25522 Transcription factor 2 Tcf2  
1441485\_at 1.02113 "Yip1 domain family, member 6" Yipf6  
1441486\_at 1.20201 RIKEN cDNA C430014M02 gene C430014M02Rik  
1441487\_at 1.03991 tripartite motif protein 2 Trim2  
1441488\_at 0.90089 Transcribed locus ---  
1441489\_at 1.00137 hypothetical LOC552878 LOC552878  
1441490\_at 1.02709 transmembrane protein 39a Tmem39a  
1441491\_at 1.01650 RIKEN cDNA A330068G13 gene A330068G13Rik  
1441492\_at 1.22197 Zinc finger protein 64 Zfp64  
1441493\_at 0.92207 ELKS/RAB6-interacting/CAST family member 1 Erc1  
1441494\_at 1.02207 Retinoblastoma 1 Rb1  
1441495\_at 0.84588 potassium channel tetramerisation domain containing 8 Kctd8  
1441496\_at 0.84672 tudor domain containing 3 Tdrd3  
1441497\_at 0.97712 expressed sequence AA388235 AA388235  
1441498\_at 1.05790 "Protein tyrosine phosphatase, receptor type, D" Ptpnd  
1441499\_at 1.27782 "Adult male hypothalamus cDNA, RIKEN full-length enriched library, clone:  
A230096K23 product:39 KDA ANTIGEN homolog [Leishmania donovani], full insert sequence" ---  
1441500\_at 0.99167 --- ---  
1441501\_at 1.07875 Serpine1 mRNA binding protein 1 Serbp1  
1441502\_at 1.16199 Leucine rich repeat and fibronectin type III domain containing 5 Lrfn5  
1441503\_at 1.01099 doublecortin domain containing 2a Dcdc2a  
1441504\_at 1.03374 "gene model 817, (NCBI)" Gm817  
1441505\_at 2.35778 --- ---  
1441506\_at 1.03156 decorin Dcn  
1441507\_at 1.05655 spectrin beta 2 Spnb2  
1441508\_at 0.92514 "Adult retina cDNA, RIKEN full-length enriched library, clone:A930026H04  
product:hypothetical protein, full insert sequence" ---  
1441509\_at 0.86253 RIKEN cDNA A130009I22 gene A130009I22Rik  
1441510\_at 1.02672 "Ras homolog gene family, member f" Rhof

1441511\_at 1.03958 "potassium channel, subfamily T, member 1" Kcnt1  
1441512\_at 0.86169 RIKEN cDNA 6030445D17 gene 6030445D17Rik  
1441513\_at 0.95953 TRAF family member-associated Nf-kappa B activator Tank  
1441514\_at 0.86228 "3-oxoacyl-ACP synthase, mitochondrial" Oxsm  
1441515\_at 0.94753 --- ---  
1441516\_a\_at 0.94249 RIKEN cDNA C130050O18 gene C130050O18Rik  
1441517\_at 1.08234 "Sprouty protein with EVH-1 domain 1, related sequence" Spred1  
1441518\_at 1.10818 "Adult retina cDNA, RIKEN full-length enriched library, clone:A930003C13  
product:unclassifiable, full insert sequence" ---  
1441519\_at 1.05582 nidogen 1 Nid1  
1441520\_at 0.82263 "asp (abnormal spindle)-like, microcephaly associated (Drosophila)" Aspm  
1441521\_at 1.08109 "Calcium channel, voltage-dependent, beta 2 subunit" Cacnb2  
1441522\_at 1.22810 expressed sequence AW495713 AW495713  
1441523\_at 0.98745 neurofibromatosis 1 Nf1  
1441524\_at 0.96543 "cytoplasmic tyrosine kinase, Dscr28C related (Drosophila)" Tec  
1441525\_at 1.09591 NIMA (never in mitosis gene a)-related expressed kinase 11 Nek11  
1441526\_at 1.32109 Mbt domain containing 1 Mbtd1  
1441527\_at 0.93686 RIKEN cDNA 4930558J18 gene 4930558J18Rik  
1441528\_at 1.24686 tetratricopeptide repeat domain 15 Ttc15  
1441529\_at 1.11164 RIKEN cDNA 9130230N09 gene 9130230N09Rik  
1441530\_at 1.05718 Muscleblind-like 3 (Drosophila) Mbnl3  
1441531\_at 0.98233 "phospholipase C, beta 4" Plcb4  
1441532\_at 0.98631 Transcribed locus ---  
1441533\_at 1.04360 "Adult male diencephalon cDNA, RIKEN full-length enriched library,  
clone:9330162K03 product:unclassifiable, full insert sequence" ---  
1441534\_at 0.86327 expressed sequence C86753 C86753  
1441535\_at 1.87787 Myeloid/lymphoid or mixed lineage-leukemia translocation to 3 homolog  
(Drosophila) Mllt3  
1441536\_at 1.89533 3-hydroxy-3-methylglutaryl-Coenzyme A synthase 1 Hmgcs1  
1441537\_at 1.03182 RecQ protein-like 5 Recql5  
1441538\_at 0.92460 Dipeptidylpeptidase 6 Dpp6  
1441539\_at 3.48177 --- ---  
1441540\_at 1.03996 Nuclear receptor coactivator 7 Ncoa7  
1441541\_at 0.90690 Expressed sequence AW011752 AW011752  
1441542\_at 0.93392 dystrophin related protein 2 Drp2  
1441543\_at 1.05298 Eyes absent 3 homolog (Drosophila) Eya3  
1441544\_at 1.16713 Cyclin M3 Cnm3  
1441545\_at 1.72850 RIKEN cDNA 9230115F04 gene 9230115F04Rik  
1441546\_at 1.48973 hypothetical LOC624524 LOC624524  
1441547\_at 1.49462 Nuclear factor I/A Nfia  
1441548\_at 0.93004 FERM domain containing 4B Frmd4b  
1441549\_at 1.68797 --- ---  
1441550\_at 1.07502 RIKEN cDNA 9330184L24 gene 9330184L24Rik

1441551\_at 1.05178 myopalladin Mypn  
1441552\_at 0.91232 RIKEN cDNA A430107P09 gene A430107P09Rik  
1441553\_at 0.99361 androgen-induced proliferation inhibitor Aprin  
1441554\_at 0.93863 RIKEN cDNA 4833446K15 gene 4833446K15Rik  
1441555\_at 1.06659 --- ---  
1441556\_at 1.22523 "Bromodomain adjacent to zinc finger domain, 2B" Baz2b  
1441557\_at 1.17950 SET domain containing (lysine methyltransferase) 8 Setd8  
1441558\_at 1.86988 RIKEN cDNA D230044B12 gene D230044B12Rik  
1441559\_at 0.98662 similar to CG11212-PA LOC627626  
1441560\_at 0.95545 "catenin (cadherin associated protein), alpha 3" Ctnna3  
1441561\_at 1.29611 F-box and leucine-rich repeat protein 3 Fbxl3  
1441562\_at 1.05095 RIKEN cDNA A230048O21 gene A230048O21Rik  
1441563\_at 0.95905 RIKEN cDNA 2410017P07 gene 2410017P07Rik  
1441564\_at 1.01760 Transcribed locus ---  
1441565\_at 0.98148 --- ---  
1441566\_at 0.84578 Transcribed locus ---  
1441567\_at 1.71986 Myosin IXa Myo9a  
1441568\_at 1.09633 cDNA sequence BC010311 BC010311  
1441569\_at 1.09511 RIKEN cDNA E330009P21 gene E330009P21Rik  
1441570\_at 1.03327 RIKEN cDNA 2810021G02 gene 2810021G02Rik  
1441571\_at 1.11586 RIKEN cDNA 2410089E03 gene 2410089E03Rik  
1441572\_at 1.03069 RIKEN cDNA C030036D22 gene C030036D22Rik  
1441573\_at 0.98884 Sex comb on midleg homolog 1 Scmh1  
1441574\_at 1.02180 "Phosphatidylinositol transfer protein, cytoplasmic 1" Pitpnc1  
1441575\_at 0.94510 --- ---  
1441576\_at 1.18350 RIKEN cDNA 2410002O22 gene 2410002O22Rik  
1441577\_at 2.08447 RIKEN cDNA C530014P21 gene C530014P21Rik  
1441578\_at 1.04269 --- ---  
1441579\_at 0.98346 doublesex and mab-3 related transcription factor like family A1 Dmrta1  
1441580\_at 1.00221 Sphingosine-1-phosphate phosphatase 2 Sgpp2  
1441581\_at 1.08223 ankyrin repeat and SOCS box-containing protein 10 Asb10  
1441582\_at 1.04863 --- ---  
1441583\_at 1.01170 --- ---  
1441584\_at 0.91373 Friend leukemia integration 1 Fli1  
1441585\_at 0.97607 Spastic paraplegia 7 homolog (human) Spg7  
1441586\_at 0.99086 Target of myb1-like 2 (chicken) Tom1l2  
1441587\_at 0.95669 phospholipase C-like 4 Plcl4  
1441588\_at 1.28126 KCNQ1 overlapping transcript 1 Kcnq1ot1  
1441589\_at 1.02303 Src family associated phosphoprotein 1 Scap1  
1441590\_at 1.07806 "potassium inwardly-rectifying channel, subfamily J, member 5" Kcnj5  
1441591\_at 0.97088 --- ---  
1441592\_at 1.33294 Jumonji domain containing 1C Jmjd1c  
1441593\_at 1.09436 Phosphatase and tensin homolog Pten

1441594\_at 1.15514 "AF4/FMR2 family, member 1" Aff1  
1441595\_at 1.00495 "Excision repair cross-complementing rodent repair deficiency, complementation group 6" Ercc6  
1441596\_at 0.92573 RIKEN cDNA 5730601F06 gene 5730601F06Rik  
1441597\_at 1.31132 Ankyrin repeat and KH domain containing 1 Ankhd1  
1441598\_at 0.92731 transmembrane protein with EGF-like and two follistatin-like domains 2 Tmeff2  
1441599\_at 0.87295 RIKEN cDNA 2900075B16 gene 2900075B16Rik  
1441600\_at 0.93780 hypothetical protein C920021A13 C920021A13  
1441601\_at 1.10789 "Origin recognition complex, subunit 5-like (*S. cerevisiae*)" Orc5l  
1441602\_at 1.32085 RIKEN cDNA 1110005A03 gene 1110005A03Rik  
1441603\_at 1.00805 somatostatin receptor 3 Sstr3  
1441604\_at 1.70830 Esterase D/formylglutathione hydrolase Esd  
1441605\_at 1.08781 --- ---  
1441606\_at 1.00307 Neuregulin 3 Nrg3  
1441607\_at 1.23835 expressed sequence AU015603 AU015603  
1441608\_at 1.10485 "Calcium channel, voltage-dependent, alpha2/delta subunit 1" Cacna2d1  
1441609\_at 1.07631 Transcribed locus ---  
1441610\_at 0.89342 expressed sequence N28178 N28178  
1441611\_at 1.21299 "zinc finger, DHHC domain containing 6 /// similar to Probable palmitoyltransferase ZDHHC6 (Zinc finger DHHC domain-containing protein 6) (DHHC-6) (H4 homolog)" Zdhhc6 /// LOC669170  
1441612\_at 1.57039 Zinc finger protein 148 Zfp148  
1441613\_at 1.00127 RIKEN cDNA 1110033F14 gene 1110033F14Rik  
1441614\_at 1.00587 --- ---  
1441615\_at 1.38036 "core-binding factor, runt domain, alpha subunit 2, translocated to, 2 homolog (human)" Cbfa2t2h  
1441616\_at 0.95589 --- ---  
1441617\_at 2.07524 "positive cofactor 2, multiprotein complex, glutamine/Q-rich-associated protein" Pcqap  
1441618\_at 1.05380 Rho GTPase activating protein 29 Arhgap29  
1441619\_at 0.91639 zinc finger protein 14 Zfp14  
1441620\_at 1.24933 Growth factor receptor bound protein 10 Grb10  
1441621\_at 1.03358 Transcribed locus ---  
1441622\_at 0.86886 hypothetical gene supported by AK078896 LOC433023  
1441623\_at 1.03642 --- ---  
1441624\_at 1.32186 sorbin and SH3 domain containing 2 Sorbs2  
1441625\_at 0.91776 RIMS binding protein 2 /// similar to RIM binding protein 2 (RIM-BP2) Rimpb2 /// LOC637661  
1441626\_at 0.99338 --- ---  
1441627\_at 1.05299 Early B-cell factor 1 Ebf1  
1441628\_at 1.07524 Diaphanous homolog 3 (*Drosophila*) Diap3  
1441629\_at 1.97684 Glutamate receptor interacting protein 1 Grip1  
1441630\_at 1.48050 E1A binding protein p400 Ep400

1441631\_at 1.26289 DEAD (Asp-Glu-Ala-Asp) box polypeptide 24 Ddx24  
1441632\_at 1.37054 RIKEN cDNA C130079B09 gene C130079B09Rik  
1441633\_at 0.95835 Nudix (nucleoside diphosphate linked moiety X)-type motif 9 Nudt9  
1441634\_at 1.15510 netrin G1 Ntnng1  
1441635\_at 1.20931 Olfactomedin-like 2A Olfml2a  
1441636\_at 0.98624 Transcribed locus ---  
1441637\_at 2.28940 RIKEN cDNA F730047E07 gene F730047E07Rik  
1441638\_at 0.98402 RIKEN cDNA A630014C17 gene A630014C17Rik  
1441639\_at 0.93446 "zinc finger, CCHC domain containing 8" Zcchc8  
1441640\_at 1.01159 Suppressor of cytokine signaling 5 Socs5  
1441641\_at 0.98427 RIKEN cDNA D630032N06 gene D630032N06Rik  
1441642\_at 1.29421 Like-glycosyltransferase Large  
1441643\_at 0.90726 membrane-associated ring finger (C3HC4) 3 3-Mar  
1441644\_at 1.09530 "Protein tyrosine phosphatase, receptor type, K" Ptpkr  
1441645\_s\_at 0.95116 importin 9 Ipo9  
1441646\_at 0.99802 RIKEN cDNA 1110059P08 gene 1110059P08Rik  
1441647\_at 0.89465 Fyn proto-oncogene Fyn  
1441648\_at 1.07310 C1q and tumor necrosis factor related protein 4 C1qtnf4  
1441649\_at 0.98103 Sestrin 1 Sesn1  
1441650\_at 1.09568 Rho GTPase activating protein 15 Arhgap15  
1441651\_at 0.90574 RIKEN cDNA 4930414N06 gene 4930414N06Rik  
1441652\_at 1.06717 "bone morphogenic protein receptor, type II (serine/threonine kinase)" Bmpr2  
1441653\_at 1.38422 RIKEN cDNA D030022P06 gene D030022P06Rik  
1441654\_at 1.07574 "Guanine nucleotide binding protein, alpha stimulating, olfactory type" Gnal  
1441655\_at 0.87575 "gene model 884, (NCBI)" Gm884  
1441656\_at 1.96017 RIKEN cDNA B930068K11 gene B930068K11Rik  
1441657\_at 0.98191 BTB and CNC homology 2 Bach2  
1441658\_at 0.89388 Transcribed locus ---  
1441659\_at 0.98148 "D4, zinc and double PHD fingers, family 3" Dpf3  
1441660\_at 1.26051 ARP2 actin-related protein 2 homolog (yeast) Actr2  
1441661\_at 0.98865 --- ---  
1441662\_at 1.13867 "Cytochrome P450, family 4, subfamily x, polypeptide 1" Cyp4x1  
1441663\_at 1.29329 Prickle like 1 (Drosophila) Prickle1  
1441664\_at 1.06736 hypothetical gene supported by AK081809 LOC433351  
1441665\_at 1.02723 "isoleucine-tRNA synthetase 2, mitochondrial" Iars2  
1441666\_at 0.93872 "Visual cortex cDNA, RIKEN full-length enriched library, clone:K530010N24  
product:unclassifiable, full insert sequence" ---  
1441667\_s\_at 1.04056 SET and MYND domain containing 1 Smyd1  
1441668\_at 1.13028 RIKEN cDNA E130107B13 gene E130107B13Rik  
1441669\_at 1.16086 "centaurin, beta 2" Centb2  
1441670\_at 1.07783 T-cell lymphoma invasion and metastasis 2 Tiam2  
1441671\_at 1.16588 Glucocorticoid induced transcript 1 Glcci1  
1441672\_at 1.04530 "DNA segment, Chr 3, ERATO Doi 547, expressed" D3Ert547e

|              |         |                                                                                                                                                     |               |
|--------------|---------|-----------------------------------------------------------------------------------------------------------------------------------------------------|---------------|
| 1441673_at   | 1.19049 | plasma membrane proteolipid                                                                                                                         | Pllp          |
| 1441674_at   | 1.04529 | ---                                                                                                                                                 | ---           |
| 1441675_at   | 0.99347 | ---                                                                                                                                                 | ---           |
| 1441676_at   | 0.76214 | zinc finger protein 406                                                                                                                             | Zfp406        |
| 1441677_at   | 1.41615 | SMC4 structural maintenance of chromosomes 4-like 1 (yeast)                                                                                         | Smc4l1        |
| 1441678_at   | 1.04319 | ---                                                                                                                                                 | ---           |
| 1441679_at   | 1.03206 | "Calcium channel, voltage-dependent, L type, alpha 1C subunit"                                                                                      | Cacna1c       |
| 1441680_at   | 0.91794 | "RNA binding motif, single stranded interacting protein"                                                                                            | Rbms3         |
| 1441681_at   | 1.03778 | "exportin, tRNA (nuclear export receptor for tRNAs)"                                                                                                | Xpot          |
| 1441682_s_at | 1.15280 | "exportin, tRNA (nuclear export receptor for tRNAs)"                                                                                                | Xpot          |
| 1441683_at   | 1.76037 | RIKEN cDNA 1110033M05 gene                                                                                                                          | 1110033M05Rik |
| 1441684_at   | 1.19851 | tetratricopeptide repeat domain 3                                                                                                                   | Ttc3          |
| 1441685_at   | 0.85477 | proline synthetase co-transcribed                                                                                                                   | Prosc         |
| 1441686_at   | 0.89059 | ---                                                                                                                                                 | ---           |
| 1441687_at   | 0.91095 | ---                                                                                                                                                 | ---           |
| 1441688_at   | 1.62272 | RIKEN cDNA 6430537I21 gene                                                                                                                          | 6430537I21Rik |
| 1441689_at   | 1.24300 | nucleoporin 153                                                                                                                                     | Nup153        |
| 1441690_at   | 0.97842 | cadherin 8                                                                                                                                          | Cdh8          |
| 1441691_at   | 0.94041 | Transcribed locus                                                                                                                                   | ---           |
| 1441692_at   | 1.00117 | PFTAIRE protein kinase 1                                                                                                                            | Pftk1         |
| 1441693_at   | 0.64497 | "ADAM metalloproteinase with thrombospondin type 1 motif, 3"                                                                                        | Adamts3       |
| 1441694_at   | 0.96659 | Transcribed locus                                                                                                                                   | ---           |
| 1441695_at   | 1.02973 | Similar to Potassium voltage-gated channel subfamily G member 2 (Voltage-gated potassium channel subunit Kv6.2) (Cardiac potassium channel subunit) | LOC240444     |
| 1441696_at   | 1.07922 | SEC22 vesicle trafficking protein-like A (S. cerevisiae)                                                                                            | Sec22a        |
| 1441697_at   | 0.94807 | Mastermind like 1 (Drosophila)                                                                                                                      | Maml1         |
| 1441698_at   | 1.24001 | RIKEN cDNA 2410025L10 gene                                                                                                                          | 2410025L10Rik |
| 1441699_at   | 0.94230 | "Atpase, class I, type 8B, member 2"                                                                                                                | Atp8b2        |
| 1441700_at   | 0.86303 | "solute carrier family 4 (anion exchanger), member 8"                                                                                               | Slc4a8        |
| 1441701_at   | 0.89147 | Zinc finger protein 148                                                                                                                             | Zfp148        |
| 1441702_at   | 1.12940 | "Regulatory factor X, 3 (influences HLA class II expression)"                                                                                       | Rfx3          |
| 1441703_at   | 1.07711 | RIKEN cDNA 2210018M03 gene                                                                                                                          | 2210018M03Rik |
| 1441704_at   | 0.97388 | "Pleckstrin homology domain containing, family A member 5"                                                                                          | Plekha5       |
| 1441705_at   | 0.99978 | expressed sequence AU015680                                                                                                                         | AU015680      |
| 1441706_at   | 1.12556 | Down syndrome cell adhesion molecule-like 1                                                                                                         | Dscam1l       |
| 1441707_at   | 1.58575 | ---                                                                                                                                                 | ---           |
| 1441708_at   | 0.96612 | sperm associated antigen 16                                                                                                                         | Spag16        |
| 1441709_at   | 1.29714 | "solute carrier family 11 (proton-coupled divalent metal ion transporters), member 2"                                                               | Slc11a2       |
| 1441710_at   | 0.93750 | Transcribed locus                                                                                                                                   | ---           |
| 1441711_at   | 1.01009 | unc-45 homolog B (C. elegans)                                                                                                                       | Unc45b        |
| 1441712_at   | 0.91434 | Trf (TATA binding protein-related factor)-proximal protein homolog (Drosophila)                                                                     | Trfp          |

1441713\_at 0.94645 anaphase promoting complex subunit 7 Anapc7  
 1441714\_at 0.98236 Transcribed locus ---  
 1441715\_at 0.96306 RIKEN cDNA B130055D15 gene B130055D15Rik  
 1441716\_at 0.99691 "12 days embryo eyeball cDNA, RIKEN full-length enriched library, clone:  
 D230024G22 product:unclassifiable, full insert sequence" ---  
 1441717\_at 1.02907 "DNA segment, Chr 9, ERATO Doi 596, expressed" D9Ertd596e  
 1441718\_at 1.50587 "E3 ubiquitin protein ligase, HECT domain containing, 1" Edd1  
 1441719\_at 0.96178 "Transcribed locus, weakly similar to XP\_578477.1 PREDICTED: similar to  
 hypothetical protein DKFZp434P0316 [Rattus norvegicus]" ---  
 1441720\_at 1.07358 RIKEN cDNA 4921530L18 gene 4921530L18Rik  
 1441721\_at 0.95060 --- ---  
 1441722\_at 1.50391 Apoptosis antagonizing transcription factor Aatf  
 1441723\_at 0.99834 dual specificity phosphatase 22 Dusp22  
 1441724\_at 1.18826 --- ---  
 1441725\_at 0.94061 RIKEN cDNA 6530402F18 gene 6530402F18Rik  
 1441726\_at 1.06353 CLIP associating protein 2 Clasp2  
 1441727\_s\_at 1.16379 zinc finger protein 467 Zfp467  
 1441728\_at 0.92797 "sodium channel, voltage-gated, type I, alpha" Scn1a  
 1441729\_at 0.93894 Transcribed locus ---  
 1441730\_at 0.94836 "Protein phosphatase 1, regulatory (inhibitor) subunit 12B" Ppp1r12b  
 1441731\_at 0.95279 Transcribed locus ---  
 1441732\_at 0.90810 Teashirt zinc finger family member 1 Tshz1  
 1441733\_s\_at 0.95421 nucleoporin 153 Nup153  
 1441734\_at 0.93912 Calcium/calmodulin-dependent protein kinase II alpha Camk2a  
 1441735\_at 0.97022 --- ---  
 1441736\_at 1.05162 Integrin alpha FG-GAP repeat containing 1 Itfg1  
 1441737\_s\_at 1.11219 Ras association (RalGDS/AF-6) domain family 1 Rassf1  
 1441738\_at 0.84768 --- ---  
 1441739\_at 0.92317 Early B-cell factor 4 Ebf4  
 1441740\_at 0.92169 --- ---  
 1441741\_at 1.02937 RIKEN cDNA 1700049E17 gene /// RIKEN cDNA 4930503E14 gene ///  
 RIKEN cDNA 1700024B05 gene /// similar to RIKEN cDNA 4930503E14 /// hypothetical protein  
 LOC624112 /// similar to Spetex-2C protein /// similar to Spetex-2C protein /// similar to Spetex-2C  
 protein 1700049E17Rik /// 4930503E14Rik /// 1700024B05Rik /// LOC434459 /// LOC624112 ///  
 LOC638262 /// LOC666214 /// LOC666264  
 1441742\_at 0.96425 "potassium voltage-gated channel, subfamily H (eag-related), member 5" Kcnh5  
 1441743\_at 1.10530 paired box gene 3 Pax3  
 1441744\_at 0.94126 "Calcium channel, voltage-dependent, L type, alpha 1C subunit" Cacna1c  
 1441745\_at 1.01066 Fetal Alzheimer antigen Falz  
 1441746\_at 0.93943 --- ---  
 1441747\_at 0.89825 "Adult male spinal cord cDNA, RIKEN full-length enriched library, clone:  
 A330024P14 product:unclassifiable, full insert sequence" ---  
 1441748\_at 0.96313 "Zinc finger, ZZ domain containing 3" Zzz3



1441749\_at 1.47763 RIKEN cDNA 4930447F24 gene 4930447F24Rik  
1441750\_x\_at 1.23394 RIKEN cDNA 4930447F24 gene 4930447F24Rik  
1441751\_at 0.85372 expressed sequence AW493563 AW493563  
1441752\_at 0.99313 ADP-ribosyltransferase 3 Art3  
1441753\_at 1.85321 RIKEN cDNA 4921505C17 gene 4921505C17Rik  
1441754\_at 0.90622 --- ---  
1441755\_at 0.81922 mitogen-activated protein kinase 15 Mapk15  
1441756\_at 1.34285 "Transcription factor 7-like 2, T-cell specific, HMG-box" Tcf7l2  
1441757\_at 1.38869 RIKEN cDNA 1190002F15 gene 1190002F15Rik  
1441758\_at 0.95381 "ras homolog gene family, member T1" Rhot1  
1441759\_at 0.89749 CD82 antigen Cd82  
1441760\_at 1.09147 similar to 40S ribosomal protein S25 /// similar to 40S ribosomal protein S25 ///  
hypothetical protein LOC669102 /// similar to 40S ribosomal protein S25 LOC243302 /// LOC664840 ///  
LOC669102 /// LOC676458  
1441761\_at 0.94525 Src-like adaptor Sla  
1441762\_at 0.96067 B-cell leukemia/lymphoma 11B Bcl11b  
1441763\_at 1.44044 "zinc finger, DHHC domain containing 6" Zdhhc6  
1441764\_at 0.99780 PR domain containing 10 Prdm10  
1441765\_at 1.19626 "PREDICTED: Mus musculus similar to Heterogeneous nuclear  
ribonucleoprotein A1 (Helix-destabilizing protein) (Single-strand binding protein) (hnRNP core protein  
A1) (HDP) (LOC628392), mRNA" ---  
1441766\_at 1.19708 Transcribed locus ---  
1441767\_at 0.98311 zinc finger protein 142 Zfp142  
1441768\_at 1.24023 RIKEN cDNA 9430051O21 gene 9430051O21Rik  
1441769\_at 1.76161 ADP-ribosylation factor-like 15 Arl15  
1441770\_at 0.99334 phosphoribosyl pyrophosphate amidotransferase Ppat  
1441771\_at 1.80642 Alpha thalassemia/mental retardation syndrome X-linked homolog (human)  
Atrx  
1441772\_at 1.01740 "Purinergic receptor P2X, ligand-gated ion channel 4" P2rx4  
1441773\_at 0.92384 RIKEN cDNA 1700061N14 gene 1700061N14Rik  
1441774\_at 0.93055 "Rab38, member of RAS oncogene family" Rab38  
1441775\_at 1.15101 WD repeat domain 7 Wdr7  
1441776\_at 0.86441 tetraspanin 11 Tspan11  
1441777\_at 0.88074 empty spiracles homolog 1 (Drosophila) Emx1  
1441778\_at 1.05710 adenylate cyclase activating polypeptide 1 Adcyap1  
1441779\_at 1.54620 RIKEN cDNA 9530006C21 gene 9530006C21Rik  
1441780\_at 1.16200 Transcribed locus ---  
1441781\_at 0.86426 expressed sequence AI317158 AI317158  
1441782\_at 1.01863 AP2 associated kinase 1 Aak1  
1441783\_at 0.91286 RIKEN cDNA 2410022M11 gene 2410022M11Rik  
1441784\_at 1.07742 "Adult male hypothalamus cDNA, RIKEN full-length enriched library, clone:  
A230076B10 product:unclassifiable, full insert sequence" ---  
1441785\_at 1.04093 "gene model 879, (NCBI)" Gm879

1441786\_at 1.07133 "PREDICTED: Mus musculus similar to HYPOTHETICAL PROTEIN ORF-1137 (LOC622016), mRNA" ---

1441787\_at 1.10471 Zinc finger CCCH-type containing 12C Zc3h12c

1441788\_s\_at 1.03393 cDNA sequence BC068171 BC068171

1441789\_at 1.13432 "Rosbin, round spermatid basic protein 1" Rsb1

1441790\_at 0.94886 Transcribed locus ---

1441791\_at 1.01904 "Opioid receptor, mu 1" Oprm1

1441792\_at 1.09384 RIKEN cDNA A630033E08 gene A630033E08Rik

1441793\_at 1.00286 ring finger protein 39 Rnf39

1441794\_at 1.00568 RIKEN cDNA 4933437K13 gene 4933437K13Rik

1441795\_at 1.16927 "small nuclear RNA activating complex, polypeptide 4" Snapc4

1441796\_at 1.07657 RIKEN cDNA 2010309E21 gene 2010309E21Rik

1441797\_at 1.00310 --- ---

1441798\_at 1.08321 --- ---

1441799\_at 1.81105 RIKEN cDNA 6030422H21 gene 6030422H21Rik

1441800\_at 1.06660 --- ---

1441801\_at 0.83750 potassium channel tetramerisation domain containing 4 Kctd4

1441802\_at 1.21388 "sprouty-related, EVH1 domain containing 2" Spred2

1441803\_at 1.04922 RIKEN cDNA A130090K04 gene A130090K04Rik

1441804\_at 0.86681 --- ---

1441805\_at 0.98931 "Adult male hypothalamus cDNA, RIKEN full-length enriched library, clone: A230056E14 product:hypothetical protein, full insert sequence" ---

1441806\_at 0.89174 Chromodomain helicase DNA binding protein 1-like Chd11

1441807\_s\_at 0.88587 --- ---

1441808\_at 0.93003 RIKEN cDNA 2410002I01 gene 2410002I01Rik

1441809\_at 0.95299 RIKEN cDNA A930009A15 gene A930009A15Rik

1441810\_at 0.94064 Transcribed locus ---

1441811\_x\_at 1.43933 RIKEN cDNA 0610011I04 gene 0610011I04Rik

1441812\_at 0.96862 "cytochrome P450, family 2, subfamily u, polypeptide 1" Cyp2u1

1441813\_at 0.81941 hypothetical protein LOC670358 LOC670358

1441814\_s\_at 1.01842 RPA interacting protein Rpain

1441815\_at 1.05359 expressed sequence AI851453 AI851453

1441816\_at 1.20404 RIKEN cDNA 2900056M20 gene 2900056M20Rik

1441817\_at 1.13406 RIKEN cDNA 1700099I09 gene 1700099I09Rik

1441818\_at 0.98882 Transcribed locus ---

1441819\_x\_at 1.00475 translocase of inner mitochondrial membrane 50 homolog (yeast) Timm50

1441820\_at 1.07454 cyclin-dependent kinase-like 2 (CDC2-related kinase) Cdkl2

1441821\_at 0.84006 --- ---

1441822\_at 0.75813 RIKEN cDNA 1700008F19 gene 1700008F19Rik

1441823\_at 2.20712 retinoic acid induced 17 Rai17

1441824\_at 1.03241 membrane bound O-acyltransferase domain containing 1 Mboat1

1441825\_x\_at 0.91505 Immunoglobulin mu binding protein 2 Ighmbp2

1441826\_x\_at 0.89799 Ubiquitin domain containing 1 Ubtd1

1441827\_x\_at 1.00104 "heat shock protein 90kDa alpha (cytosolic), class A member 1 /// similar to heat shock protein 1, alpha" Hsp90aa1 /// LOC670148  
1441828\_at 1.00360 StAR-related lipid transfer (START) domain containing 5 Stard5  
1441829\_s\_at 1.37902 A kinase (PRKA) anchor protein 10 Akap10  
1441830\_x\_at 1.17987 --- ---  
1441831\_x\_at 1.01719 Chloride channel 5 Clcn5  
1441832\_at 0.91811 histone deacetylase 10 Hdac10  
1441833\_at 0.91979 N-glycanase 1 Ngly1  
1441834\_x\_at 0.96620 Cytotoxic granule-associated RNA binding protein 1 Tia1  
1441835\_x\_at 0.89408 myotubularin related protein 11 Mtmr11  
1441836\_x\_at 1.20549 RIKEN cDNA 1700006H03 gene 1700006H03Rik  
1441837\_at 1.00956 "cholinergic receptor, nicotinic, beta polypeptide 2 (neuronal)" Chrnb2  
1441838\_at 0.93845 "excision repair cross-complementing rodent repair deficiency, complementation group 1" Ercc1  
1441839\_s\_at 0.97081 cDNA sequence BC024814 BC024814  
1441840\_x\_at 1.21302 Strawberry notch homolog (Drosophila) Stno  
1441841\_at 1.08679 "a disintegrin-like and metalloproteinase (reprolysin type) with thrombospondin type 1 motif, 16" Adamts16  
1441842\_s\_at 0.87249 zinc finger protein 707 Zfp707  
1441843\_s\_at 2.29152 RIKEN cDNA 5230400M03 gene 5230400M03Rik  
1441844\_at 1.02624 Epidermal growth factor receptor pathway substrate 15-like 1 Eps1511  
1441845\_at 0.93173 calcyphosphine 2 Caps2  
1441846\_x\_at 1.05027 Transmembrane emp24 domain containing 3 Tmed3  
1441847\_at 1.12853 Microtubule associated serine/threonine kinase 2 Mast2  
1441848\_at 1.04504 Phosphomannomutase 2 Pmm2  
1441849\_at 1.02323 --- ---  
1441850\_x\_at 0.76547 transcobalamin 2 Tcn2  
1441851\_x\_at 0.80127 "lymphocyte antigen 6 complex, locus G6C" Ly6g6c  
1441852\_x\_at 1.05506 autophagy-related 16-like 1 (yeast) Atg1611  
1441853\_at 1.02345 Dipeptidylpeptidase 10 Dpp10  
1441854\_at 1.10672 "Polymerase (DNA directed), epsilon" Pole  
1441855\_x\_at 2.66323 chemokine (C-X-C motif) ligand 1 Cxcl1  
1441856\_x\_at 0.84471 trypsin domain containing 1 Tysnd1  
1441857\_x\_at 1.02040 SEH1-like (S. cerevisiae) Seh11  
1441858\_at 1.91695 Uridine-cytidine kinase 2 Uck2  
1441859\_x\_at 1.02892 Coiled-coil domain containing 64 Ccdc64  
1441860\_x\_at 0.97648 Insulin degrading enzyme Ide  
1441861\_at 0.93416 RIKEN cDNA 1700018G05 gene 1700018G05Rik  
1441862\_at 0.91142 protoporphyrinogen oxidase Ppox  
1441863\_x\_at 0.85502 --- ---  
1441864\_x\_at 0.90399 centromere protein A Cenpa  
1441865\_at 0.92197 --- ---  
1441866\_s\_at 0.94111 phosphatidylserine synthase 1 Ptdss1

|              |         |                                                                                                                                          |               |
|--------------|---------|------------------------------------------------------------------------------------------------------------------------------------------|---------------|
| 1441867_x_at | 0.83864 | RIKEN cDNA 4930534B04 gene                                                                                                               | 4930534B04Rik |
| 1441868_x_at | 1.02271 | DC-STAMP domain containing 2                                                                                                             | Dcst2         |
| 1441869_x_at | 1.14915 | Autism susceptibility candidate 2                                                                                                        | Auts2         |
| 1441870_s_at | 0.90403 | polycystic kidney disease 2                                                                                                              | Pkd2          |
| 1441871_at   | 1.09709 | RIKEN cDNA 1810044D09 gene                                                                                                               | 1810044D09Rik |
| 1441872_x_at | 0.96905 | PHD finger protein 17                                                                                                                    | Phf17         |
| 1441873_at   | 1.04223 | prolactin-like protein E                                                                                                                 | Prlpe         |
| 1441874_x_at | 0.92521 | prolactin-like protein E                                                                                                                 | Prlpe         |
| 1441875_at   | 0.89243 | RIKEN cDNA 1700063J08 gene                                                                                                               | 1700063J08Rik |
| 1441876_x_at | 0.96595 | Zinc finger protein 93                                                                                                                   | Zfp93         |
| 1441877_x_at | 0.86125 | tumor suppressing subtransferable candidate 1                                                                                            | Tssc1         |
| 1441878_s_at | 0.82643 | RIKEN cDNA 1810049H13 gene                                                                                                               | 1810049H13Rik |
| 1441879_x_at | 0.93296 | "makorin, ring finger protein, 1"                                                                                                        | Mkrn1         |
| 1441880_x_at | 0.97977 | hypothetical protein MGC30332                                                                                                            | MGC30332      |
| 1441881_x_at | 0.98838 | RIKEN cDNA 3110032G18 gene                                                                                                               | 3110032G18Rik |
| 1441882_at   | 0.92563 | ---                                                                                                                                      | ---           |
| 1441883_at   | 0.80902 | RIKEN cDNA 0610010O12 gene                                                                                                               | 0610010O12Rik |
| 1441884_x_at | 1.06326 | chemokine (C-X3-C motif) ligand 1                                                                                                        | Cx3cl1        |
| 1441885_s_at | 1.06295 | "Adult male urinary bladder cDNA, RIKEN full-length enriched library, clone:9530098H01 product:unclassifiable, full insert sequence" --- |               |
| 1441886_at   | 0.95855 | RIKEN cDNA 4930532D21 gene                                                                                                               | 4930532D21Rik |
| 1441887_x_at | 1.02068 | hypothetical protein LOC622976                                                                                                           | LOC622976     |
| 1441888_x_at | 1.10411 | ---                                                                                                                                      | ---           |
| 1441889_x_at | 0.98246 | Rac GTPase-activating protein 1                                                                                                          | Racgap1       |
| 1441890_x_at | 1.04465 | transmembrane protein with EGF-like and two follistatin-like domains 1                                                                   | Tmeff1        |
| 1441891_x_at | 0.85090 | "ELOVL family member 7, elongation of long chain fatty acids (yeast)" Elov17                                                             |               |
| 1441892_x_at | 1.16987 | RIKEN cDNA 4933440H19 gene                                                                                                               | 4933440H19Rik |
| 1441893_at   | 0.93451 | testis expressed gene 24                                                                                                                 | Tex24         |
| 1441894_s_at | 1.06247 | GRP1 (general receptor for phosphoinositides 1)-associated scaffold protein Grasp                                                        |               |
| 1441895_x_at | 0.95526 | Transcribed locus                                                                                                                        | ---           |
| 1441896_x_at | 1.32073 | Oligonucleotide/oligosaccharide-binding fold containing 1                                                                                | Obfc1         |
| 1441897_at   | 0.93852 | RIKEN cDNA B230120H23 gene                                                                                                               | B230120H23Rik |
| 1441898_at   | 0.93252 | RIKEN cDNA E530011F12 gene                                                                                                               | E530011F12Rik |
| 1441899_x_at | 0.93236 | Brevican                                                                                                                                 | Bcan          |
| 1441900_x_at | 1.04615 | Hspb associated protein 1                                                                                                                | Hspbap1       |
| 1441901_x_at | 0.95792 | fumarylacetoacetate hydrolase domain containing 2A                                                                                       | Fahd2a        |
| 1441902_x_at | 1.02937 | ---                                                                                                                                      | ---           |
| 1441903_x_at | 0.98232 | "meteorin, glial cell differentiation regulator-like" Metrnl                                                                             |               |
| 1441904_x_at | 0.78303 | RIKEN cDNA 9130005N14 gene                                                                                                               | 9130005N14Rik |
| 1441905_x_at | 0.87555 | Small nuclear ribonucleoprotein N                                                                                                        | Snrpn         |

|              |         |                                                                                |                       |  |
|--------------|---------|--------------------------------------------------------------------------------|-----------------------|--|
| 1441906_x_at | 1.11211 | Synapse associated protein 1                                                   | Syap1                 |  |
| 1441907_s_at | 0.97340 | CD93 antigen                                                                   | Cd93                  |  |
| 1441908_x_at | 1.09889 | CD93 antigen                                                                   | Cd93                  |  |
| 1441909_s_at | 0.90960 | RIKEN cDNA 9530066K23 gene                                                     | 9530066K23Rik         |  |
| 1441910_x_at | 0.87934 | cyclin E1                                                                      | Ccne1                 |  |
| 1441911_x_at | 0.98176 | phosphoribosylglycinamide formyltransferase                                    | Gart                  |  |
| 1441912_x_at | 0.91762 | complement component 2 (within H-2S)                                           | C2                    |  |
| 1441913_at   | 1.06674 | leucine zipper protein 2                                                       | Luzp2                 |  |
| 1441914_x_at | 0.99733 | Fibroblast growth factor 3                                                     | Fgf3                  |  |
| 1441915_s_at | 1.05605 | RIKEN cDNA 2310076L09 gene                                                     | 2310076L09Rik         |  |
| 1441916_s_at | 0.94365 | outer dense fiber of sperm tails 3                                             | Odf3                  |  |
| 1441917_s_at | 0.95653 | transmembrane protein 40                                                       | Tmem40                |  |
| 1441918_x_at | 0.95898 | similar to NK13 RP23-262J21.5                                                  |                       |  |
| 1441919_x_at | 0.88110 | carnitine acetyltransferase                                                    | Crat                  |  |
| 1441920_x_at | 1.01551 | HpaII tiny fragments locus 9c                                                  | Htf9c                 |  |
| 1441921_x_at | 0.87349 | "estrogen related receptor, beta"                                              | Esrrb                 |  |
| 1441922_x_at | 1.04980 | vacuolar protein sorting 11 (yeast)                                            | Vps11                 |  |
| 1441923_s_at | 1.00866 | endothelin 3                                                                   | Edn3                  |  |
| 1441924_x_at | 1.27092 | endothelin 3                                                                   | Edn3                  |  |
| 1441925_at   | 1.05354 | "solute carrier family 15, member 4"                                           | Slc15a4               |  |
| 1441926_x_at | 0.97238 | transmembrane inner ear                                                        | Tmie                  |  |
| 1441927_at   | 0.79748 | Synaptotagmin VII                                                              | Syt7                  |  |
| 1441928_x_at | 1.02217 | elongation factor RNA polymerase II                                            | Ell                   |  |
| 1441929_at   | 0.90201 | Midline 1                                                                      | Mid1                  |  |
| 1441930_x_at | 0.98342 | Vesicle amine transport protein 1 homolog (T californica)                      | Vat1                  |  |
| 1441931_x_at | 0.85224 | glutathione synthetase                                                         | Gss                   |  |
| 1441932_at   | 1.06220 | "Protein tyrosine phosphatase, receptor type, D"                               | Ptprd                 |  |
| 1441933_x_at | 1.03639 | "phosphatidylinositol glycan anchor biosynthesis, class Z"                     | Pigz                  |  |
| 1441934_at   | 0.98326 | ---                                                                            | ---                   |  |
| 1441935_at   | 1.23751 | "ankyrin repeat, family A (RFXANK-like), 2"                                    | Ankra2                |  |
| 1441936_x_at | 0.92401 | RIKEN cDNA 4930447M23 gene                                                     | 4930447M23Rik         |  |
| 1441937_s_at | 0.88525 | PTEN induced putative kinase 1                                                 | Pink1                 |  |
| 1441938_x_at | 1.06204 | Cdk5 and Abl enzyme substrate 1 /// similar to Cdk5 and Abl enzyme substrate 1 | Cables1 /// LOC635753 |  |
| 1441939_x_at | 1.04059 | RIKEN cDNA 2410003I16 gene                                                     | 2410003I16Rik         |  |
| 1441940_x_at | 1.00008 | kelch domain containing 8A                                                     | Klhdc8a               |  |
| 1441941_x_at | 0.96191 | "serine (or cysteine) peptidase inhibitor, clade B, member 5"                  | Serpib5               |  |
| 1441942_x_at | 1.08445 | snurportin 1                                                                   | Snupn                 |  |
| 1441943_x_at | 0.97833 | Cytokine induced apoptosis inhibitor 1                                         | Ciapin1               |  |
| 1441944_s_at | 0.96184 | G protein-coupled receptor 135                                                 | Gpr135                |  |
| 1441945_s_at | 1.06019 | abhydrolase domain containing 14A                                              | Abhd14a               |  |
| 1441946_at   | 0.96070 | inter-alpha (globulin) inhibitor H5                                            | Itih5                 |  |
| 1441947_x_at | 1.12408 | cDNA sequence BC033915                                                         | BC033915              |  |

|              |         |                                                                                                                                           |                     |
|--------------|---------|-------------------------------------------------------------------------------------------------------------------------------------------|---------------------|
| 1441948_x_at | 0.93063 | "zinc finger, AN1-type domain 3"                                                                                                          | Zfand3              |
| 1441949_x_at | 1.06536 | "solute carrier family 39 (metal ion transporter), member 6"                                                                              | Slc39a6             |
| 1441950_s_at | 1.12166 | RIKEN cDNA 2010109A12 gene                                                                                                                | 2010109A12Rik       |
| 1441951_x_at | 0.88065 | RIKEN cDNA 2010109A12 gene                                                                                                                | 2010109A12Rik       |
| 1441952_x_at | 0.69024 | Ly6/neurotoxin 1                                                                                                                          | Lynx1               |
| 1441953_at   | 1.11801 | Storkhead box 2                                                                                                                           | Stox2               |
| 1441954_s_at | 0.96484 | "H1 histone family, member N, testis-specific"                                                                                            | H1fnt               |
| 1441955_s_at | 1.00042 | polyadenylate binding protein-interacting protein 1 /// similar to poly(A) binding protein interacting protein 1                          | Paip1 /// LOC676674 |
| 1441956_s_at | 2.36598 | ---                                                                                                                                       | ---                 |
| 1441957_x_at | 0.95130 | RIKEN cDNA 2410076I21 gene                                                                                                                | 2410076I21Rik       |
| 1441958_s_at | 0.68858 | advanced glycosylation end product-specific receptor                                                                                      | Ager                |
| 1441959_s_at | 0.90932 | RIKEN cDNA 1200003C05 gene                                                                                                                | 1200003C05Rik       |
| 1441960_x_at | 0.86827 | RIKEN cDNA 5730494M16 gene                                                                                                                | 5730494M16Rik       |
| 1441961_at   | 0.91967 | microtubule-associated protein 9                                                                                                          | Mtap9               |
| 1441962_at   | 0.99171 | arachidonate 5-lipoxygenase                                                                                                               | Alox5               |
| 1441963_at   | 0.95533 | ProSAPiP1 protein                                                                                                                         | Prosapip1           |
| 1441964_at   | 0.98214 | RIKEN cDNA 1110003F05 gene                                                                                                                | 1110003F05Rik       |
| 1441965_at   | 0.91820 | coiled-coil domain containing 38                                                                                                          | Ccdc38              |
| 1441966_at   | 0.90172 | "transient receptor potential cation channel, subfamily M, member 3"                                                                      | Trpm3               |
| 1441967_at   | 0.83798 | Parkinson disease 7 domain containing 1                                                                                                   | Pddc1               |
| 1441968_at   | 0.89010 | tetraspanin 9                                                                                                                             | Tspan9              |
| 1441969_at   | 0.92070 | tripartite motif-containing 36                                                                                                            | Trim36              |
| 1441970_at   | 1.15607 | RIKEN cDNA E430010N07 gene                                                                                                                | E430010N07Rik       |
| 1441971_at   | 0.85439 | Transcribed locus                                                                                                                         | ---                 |
| 1441972_at   | 0.64591 | RIKEN cDNA 6230424C14 gene                                                                                                                | 6230424C14Rik       |
| 1441973_at   | 0.88087 | zinc finger protein 295                                                                                                                   | Zfp295              |
| 1441974_at   | 0.97516 | Transcribed locus                                                                                                                         | ---                 |
| 1441975_at   | 0.96029 | "acid phosphatase, prostate"                                                                                                              | Acpp                |
| 1441976_at   | 1.95503 | RIKEN cDNA 5430434G16 gene                                                                                                                | 5430434G16Rik       |
| 1441977_at   | 1.05216 | RIKEN cDNA 9630023C09 gene                                                                                                                | 9630023C09Rik       |
| 1441978_at   | 1.17757 | aquaporin 6                                                                                                                               | Aqp6                |
| 1441979_at   | 1.05120 | cDNA sequence BC060267                                                                                                                    | BC060267            |
| 1441980_at   | 0.78686 | RIKEN cDNA C030007I09 gene                                                                                                                | C030007I09Rik       |
| 1441981_at   | 0.95847 | "transmembrane protease, serine 11f"                                                                                                      | Tmprss11f           |
| 1441982_at   | 0.87141 | "TAF7 RNA polymerase II, TATA box binding protein (TBP)-associated factor"                                                                | Taf7                |
| 1441983_at   | 1.03018 | "0 day neonate cerebellum cDNA, RIKEN full-length enriched library, clone: C230096I08 product:hypothetical protein, full insert sequence" | ---                 |
| 1441984_at   | 1.14788 | claspin homolog (Xenopus laevis)                                                                                                          | Clspn               |
| 1441985_at   | 1.02224 | RIKEN cDNA 4933416C03 gene                                                                                                                | 4933416C03Rik       |
| 1441986_at   | 0.82603 | "zinc finger, CCHC domain containing 6"                                                                                                   | Zcchc6              |
| 1441987_at   | 1.15394 | methyl-CpG binding domain protein 5                                                                                                       | Mbd5                |

|              |         |                                                                                                                                    |               |
|--------------|---------|------------------------------------------------------------------------------------------------------------------------------------|---------------|
| 1441988_at   | 0.99110 | protein phosphatase 1K (PP2C domain containing)                                                                                    | Ppm1k         |
| 1441989_at   | 0.91476 | "BCL2/adenovirus E1B interacting protein 1, NIP2"                                                                                  | Bnip2         |
| 1441990_at   | 1.13203 | meiotic recombination 11 homolog A ( <i>S. cerevisiae</i> )                                                                        | Mre11a        |
| 1441991_at   | 0.91794 | cDNA sequence BC039632                                                                                                             | BC039632      |
| 1441992_at   | 1.41621 | "RAB14, member RAS oncogene family"                                                                                                | Rab14         |
| 1441993_at   | 0.92045 | "adaptor-related protein complex 3, sigma 2 subunit"                                                                               | Ap3s2         |
| 1441994_at   | 0.79449 | protocadherin beta 16                                                                                                              | Pcdhb16       |
| 1441995_at   | 1.11181 | Neural cell adhesion molecule 1                                                                                                    | Ncam1         |
| 1441996_at   | 1.09609 | RIKEN cDNA 9530082P21 gene                                                                                                         | 9530082P21Rik |
| 1441997_at   | 0.92130 | zinc finger protein 184 (Kruppel-like)                                                                                             | Zfp184        |
| 1441998_at   | 0.83270 | Transcribed locus                                                                                                                  | ---           |
| 1441999_at   | 1.06330 | Transcribed locus                                                                                                                  | ---           |
| 1442000_at   | 1.05698 | "gene model 1964, (NCBI)"                                                                                                          | Gm1964        |
| 1442001_at   | 0.98730 | "protein kinase, AMP-activated, beta 2 non-catalytic subunit"                                                                      | Prkab2        |
| 1442002_at   | 0.92511 | RIKEN cDNA 7030402D04 gene                                                                                                         | 7030402D04Rik |
| 1442003_at   | 1.05391 | "Mus musculus, clone IMAGE:4219318, mRNA"                                                                                          | ---           |
| 1442004_at   | 1.14293 | tripartite motif-containing 65                                                                                                     | Trim65        |
| 1442005_at   | 1.15645 | expressed sequence AW987390                                                                                                        | AW987390      |
| 1442006_at   | 0.89010 | Transcribed locus                                                                                                                  | ---           |
| 1442007_at   | 0.94524 | RIKEN cDNA 9830124H08 gene                                                                                                         | 9830124H08Rik |
| 1442008_at   | 0.76502 | "Adult male hypothalamus cDNA, RIKEN full-length enriched library, clone: A230090L04 product:unclassifiable, full insert sequence" | ---           |
| 1442009_at   | 0.92619 | "eukaryotic translation initiation factor 2C, 3"                                                                                   | Eif2c3        |
| 1442010_at   | 0.93196 | "castor homolog 1, zinc finger ( <i>Drosophila</i> ) /// similar to castor homolog 1, zinc finger" Casz1 /// LOC547380             |               |
| 1442011_at   | 1.07103 | RIKEN cDNA A230065H16 gene                                                                                                         | A230065H16Rik |
| 1442012_at   | 0.96658 | expressed sequence AU015791                                                                                                        | AU015791      |
| 1442013_at   | 1.02353 | RIKEN cDNA 4930532D21 gene                                                                                                         | 4930532D21Rik |
| 1442014_at   | 1.83279 | Interferon-related developmental regulator 1                                                                                       | Ifrd1         |
| 1442015_at   | 1.33978 | RIKEN cDNA 2500002B13 gene                                                                                                         | 2500002B13Rik |
| 1442016_at   | 1.00720 | RIKEN cDNA D630004N19 gene                                                                                                         | D630004N19Rik |
| 1442017_at   | 1.02069 | nitrogen fixation gene 1 ( <i>S. cerevisiae</i> )                                                                                  | Nfs1          |
| 1442018_at   | 1.32105 | expressed sequence AI426953                                                                                                        | AI426953      |
| 1442019_at   | 0.97957 | RIKEN cDNA B230343A10 gene                                                                                                         | B230343A10Rik |
| 1442020_at   | 0.93744 | Olfactory receptor 1329                                                                                                            | Olf1329       |
| 1442021_at   | 0.96208 | "guanine nucleotide binding protein, alpha stimulating, olfactory type"                                                            | Gnal          |
| 1442022_at   | 0.93403 | RIKEN cDNA E430004N04 gene                                                                                                         | E430004N04Rik |
| 1442023_at   | 0.95431 | RIKEN cDNA A530030E21 gene                                                                                                         | A530030E21Rik |
| 1442024_at   | 1.09636 | "Protein phosphatase 1, regulatory (inhibitor) subunit 3E"                                                                         | Ppp1r3e       |
| 1442025_a_at | 0.85226 | ---                                                                                                                                | ---           |
| 1442026_at   | 0.83420 | ---                                                                                                                                | ---           |
| 1442027_at   | 1.24521 | neurobeachin like 1                                                                                                                | Nbeal1        |
| 1442028_at   | 0.92947 | expressed sequence AI593864                                                                                                        | AI593864      |

1442029\_at 0.98441 "Potassium voltage-gated channel, subfamily Q, member 1" Kcnq1  
1442030\_at 0.92497 --- ---  
1442031\_at 1.03187 RIKEN cDNA D130073L02 gene D130073L02Rik  
1442032\_at 0.89686 cDNA sequence BC030500 BC030500  
1442033\_at 0.87904 C1q and tumor necrosis factor related protein 9 C1qtnf9  
1442034\_at 0.97011 FAST kinase domains 1 Fastkd1  
1442035\_at 1.07034 "cholinergic receptor, nicotinic, alpha polypeptide 5" Chrna5  
1442036\_a\_at 0.94533 hypothetical protein LOC668580 /// hypothetical protein LOC670695  
LOC668580 /// LOC670695  
1442037\_at 0.98715 hypothetical protein LOC668580 LOC668580  
1442038\_at 1.22497 RNA binding motif protein 26 Rbm26  
1442039\_at 1.06398 thymocyte selection-associated HMG box gene Tox  
1442040\_at 0.92606 RIKEN cDNA 6330530A05 gene 6330530A05Rik  
1442041\_at 1.29583 hypothetical LOC552876 LOC552876  
1442042\_at 1.06011 Transcription factor 20 Tcf20  
1442043\_at 0.85159 lipoma HMGIC fusion partner-like protein 4 Lhfpl4  
1442044\_at 1.14346 Transcribed locus ---  
1442045\_at 0.96180 --- ---  
1442046\_at 0.94052 shroom family member 2 /// similar to Apical-like protein (APXL protein)  
Shroom2 /// LOC670546  
1442047\_at 1.02401 ras responsive element binding protein 1 Rreb1  
1442048\_at 0.96306 ring finger protein 11 Rnf11  
1442049\_at 0.97406 Transferrin Trf  
1442050\_at 0.73845 zinc finger protein 608 /// RIKEN cDNA D430007A19 gene Zfp608 ///  
D430007A19Rik  
1442051\_at 1.17810 "histone 2, H3c1" Hist2h3c1  
1442052\_at 1.54914 RIKEN cDNA C330019G07 gene C330019G07Rik  
1442053\_at 1.00901 Phosphorylase kinase beta Phkb  
1442054\_at 1.45355 "PREDICTED: Mus musculus similar to serine-threonine protein kinase pim-2  
isoform 1 (LOC622647), mRNA" ---  
1442055\_at 0.88850 Transcribed locus ---  
1442056\_at 0.94668 Zinc finger protein 608 Zfp608  
1442057\_at 0.95908 expressed sequence AA986695 AA986695  
1442058\_s\_at 0.89375 "proteasome (prosome, macropain) 26S subunit, ATPase 3, interacting  
protein" Psmc3ip  
1442059\_at 1.01674 "fragile X mental retardation gene 1, autosomal homolog" Fxr1h  
1442060\_at 1.01296 prolyl endopeptidase-like Prepl  
1442061\_at 0.97585 BTB (POZ) domain containing 7 Btbd7  
1442062\_at 0.90485 RIKEN cDNA 7120426M23 gene 7120426M23Rik  
1442063\_at 1.01504 RIKEN cDNA 5930437A14 gene 5930437A14Rik  
1442064\_at 0.98407 expressed sequence AW556556 AW556556  
1442065\_at 0.94793 Rho GTPase activating protein 17 Arhgap17  
1442066\_at 0.90252 RIKEN cDNA C530028O21 gene C530028O21Rik



1442067\_at 1.10043 Receptor tyrosine kinase-like orphan receptor 1 Ror1  
1442068\_at 1.04228 "Mus musculus, clone IMAGE:5363897, mRNA" ---  
1442069\_at 1.32594 "DNA segment, Chr 5, Wayne State University 178, expressed" D5Wsu178e  
1442070\_at 1.01753 myeloid/lymphoid or mixed lineage-leukemia translocation to 10 homolog  
(Drosophila) Mllt10  
1442071\_at 1.20651 "ATP-binding cassette, sub-family E (OABP), member 1" Abce1  
1442072\_at 0.90189 RIKEN cDNA C230081A13 gene C230081A13Rik  
1442073\_at 1.00189 --- ---  
1442074\_at 0.96897 "C-type lectin domain family 2, member g" Clec2g  
1442075\_at 0.99075 expressed sequence AI314604 AI314604  
1442076\_at 1.00311 cordon-bleu Cobl  
1442077\_at 0.64330 RIKEN cDNA 2310076G05 gene 2310076G05Rik  
1442078\_at 1.27104 "CTD (carboxy-terminal domain, RNA polymerase II, polypeptide A) small  
phosphatase like 2" Ctdspl2  
1442079\_at 1.15551 transmembrane protein 23 Tmem23  
1442080\_at 1.13769 CAMP responsive element binding protein 3-like 2 Creb3l2  
1442081\_at 0.88559 Expressed sequence AU017455 AU017455  
1442082\_at 0.97543 complement component 3a receptor 1 C3ar1  
1442083\_at 1.20930 RIKEN cDNA 1500011J06 gene 1500011J06Rik  
1442084\_at 0.81584 Prkr interacting protein 1 (IL11 inducible) Prkrip1  
1442085\_at 1.11149 Wolf-Hirschhorn syndrome candidate 1-like 1 (human) Whsc1l1  
1442086\_at 1.03926 Metastasis associated 3 Mta3  
1442087\_at 1.52210 "H3 histone, family 3A" H3f3a  
1442088\_at 1.25025 RIKEN cDNA 9230111E07 gene 9230111E07Rik  
1442089\_at 0.98225 --- ---  
1442090\_at 1.03192 RIKEN cDNA 8030463A06 gene 8030463A06Rik  
1442091\_at 0.89194 Transcribed locus ---  
1442092\_at 1.04219 "Fanconi anemia, complementation group D2" Fancd2  
1442093\_at 1.04750 Arginine decarboxylase Adc  
1442094\_at 1.24223 "inhibitor of growth family, member 5" Ing5  
1442095\_at 1.03052 additional sex combs like 3 (Drosophila) Asxl3  
1442096\_at 0.91019 cDNA sequence BC031901 BC031901  
1442097\_at 0.88413 "0 day neonate kidney cDNA, RIKEN full-length enriched library, clone:  
D630011L08 product:hypothetical protein, full insert sequence" ---  
1442098\_at 0.91697 expressed sequence AU022434 AU022434  
1442099\_at 1.04299 ubiquitin specific peptidase 31 Usp31  
1442100\_at 0.98023 inositol polyphosphate-5-phosphatase F Inpp5f  
1442101\_at 1.06828 RIKEN cDNA A930017N06 gene A930017N06Rik  
1442102\_at 1.39620 "Aconitase 2, mitochondrial" Aco2  
1442103\_at 2.74477 Nipped-B homolog (Drosophila) Nipbl  
1442104\_at 0.97745 Ubiquitin specific peptidase 25 Usp25  
1442105\_at 0.95619 RIKEN cDNA 4831416G18 gene 4831416G18Rik  
1442106\_at 0.96752 "Fanconi anemia, complementation group M" Fancm

1442107\_at 1.90116 "filamin, beta" Flnb  
1442108\_at 1.18563 Ring finger protein 25 Rnf25  
1442109\_at 1.76378 --- ---  
1442110\_at 0.90131 SET and MYND domain containing 3 Smyd3  
1442111\_at 1.99389 RIKEN cDNA D430033H22 gene D430033H22Rik  
1442112\_at 1.32615 vacuolar protein sorting 18 (yeast) Vps18  
1442113\_at 1.01470 RIKEN cDNA 5330417C22 gene 5330417C22Rik  
1442114\_at 0.77918 XPA binding protein 1 Xab1  
1442115\_at 0.93820 RIKEN cDNA 9430028L06 gene 9430028L06Rik  
1442116\_at 0.94480 G protein-coupled receptor 176 Gpr176  
1442117\_at 0.90400 "Adult retina cDNA, RIKEN full-length enriched library, clone:A930003C13  
product:unclassifiable, full insert sequence" ---  
1442118\_at 0.97975 Transcribed locus ---  
1442119\_at 0.88666 expressed sequence AI449212 AI449212  
1442120\_at 0.89198 "Lung RCB-0558 LLC cDNA, RIKEN full-length enriched library, clone:  
G730007D18 product:hypothetical protein, full insert sequence" ---  
1442121\_at 0.91881 "cyclic AMP-regulated phosphoprotein, 21" Arpp21  
1442122\_at 1.20772 expressed sequence AI451458 AI451458  
1442123\_at 1.14660 RIKEN cDNA 2010012P19 gene 2010012P19Rik  
1442124\_at 0.82084 expressed sequence AI450326 AI450326  
1442125\_at 1.24064 "KRIT1, ankyrin repeat containing" Krit1  
1442126\_at 1.22359 RIKEN cDNA 5830417C01 gene 5830417C01Rik  
1442127\_at 0.94236 Transcribed locus ---  
1442128\_at 1.34485 Receptor accessory protein 5 Reep5  
1442129\_at 0.82676 RIKEN cDNA 1810058I24 gene 1810058I24Rik  
1442130\_at 1.10150 Hematopoietic SH2 domain containing Hsh2d  
1442131\_at 0.96374 RIKEN cDNA 1700048M11 gene 1700048M11Rik  
1442132\_at 1.05109 CDNA sequence BC057552 BC057552  
1442133\_at 1.08049 "gene model 237, (NCBI)" Gm237  
1442134\_at 1.18972 proline rich 11 Prr11  
1442135\_at 0.98207 "Gene model 237, (NCBI)" Gm237  
1442136\_at 0.87408 ankyrin repeat and IBR domain containing 1 Ankib1  
1442137\_at 1.04838 RIKEN cDNA 2010000I03 gene 2010000I03Rik  
1442138\_at 0.98642 G protein-coupled receptor 62 Gpr62  
1442139\_at 1.01216 "Adult male diencephalon cDNA, RIKEN full-length enriched library,  
clone:9330140C08 product:unclassifiable, full insert sequence" ---  
1442140\_at 1.01158 tenascin N Tnn  
1442141\_at 0.85053 cDNA sequence BC028454 BC028454  
1442142\_at 1.00370 RIKEN cDNA 2700050L05 gene 2700050L05Rik  
1442143\_at 1.07763 transmembrane protein 16D (eight membrane-spanning domains) Tmem16d  
1442144\_at 0.91365 EMI domain containing 1 Emid1  
1442145\_at 1.05196 ATPase type 13A3 Atp13a3  
1442146\_at 0.91571 Metastasis associated 3 Mta3

1442147\_at 1.03006 Phosphorylase kinase alpha 2 Phka2  
1442148\_at 0.93786 PC4 and SFRS1 interacting protein 1 Psip1  
1442149\_at 0.97364 "TBC1 domain family, member 16" Tbc1d16  
1442150\_at 1.49748 --- ---  
1442151\_at 2.21932 RIKEN cDNA D230040A04 gene D230040A04Rik  
1442152\_at 1.05181 RIKEN cDNA 4930513N10 gene 4930513N10Rik  
1442153\_at 1.12156 "Ubiquitously transcribed tetratricopeptide repeat gene, Y chromosome" Uty  
1442154\_at 0.94430 "U2 small nuclear ribonucleoprotein auxiliary factor (U2AF) 1, related sequence 2" U2af1-rs2  
1442155\_at 1.47149 RIKEN cDNA 4632427E13 gene 4632427E13Rik  
1442156\_at 0.88196 RIKEN cDNA E030030I06 gene E030030I06Rik  
1442157\_at 0.84882 RIKEN cDNA A930041H05 gene A930041H05Rik  
1442158\_at 1.13094 microtubule associated serine/threonine kinase family member 4 Mast4  
1442159\_at 0.99980 "DNA segment, Chr 2, ERATO Doi 48, expressed" D2Ertd48e  
1442160\_at 1.06087 RIKEN cDNA 7530404M11 gene 7530404M11Rik  
1442161\_at 0.96912 immunoglobulin (CD79A) binding protein 1 Igbp1  
1442162\_at 0.97933 --- ---  
1442163\_at 1.51960 "HECT domain and ankyrin repeat containing, E3 ubiquitin protein ligase 1" Hace1  
1442164\_at 0.97241 basic leucine zipper nuclear factor 1 Blzf1  
1442165\_at 0.74389 armadillo repeat containing 9 Armc9  
1442166\_at 0.83777 copine V Cpne5  
1442167\_at 1.00821 cytoplasmic FMR1 interacting protein 2 Cyfip2  
1442168\_at 1.54424 RIKEN cDNA A230071A22 gene A230071A22Rik  
1442169\_at 0.86268 very low density lipoprotein receptor Vldlr  
1442170\_at 1.17837 "Elastase 3, pancreatic" Ela3  
1442171\_at 1.03044 PRP40 pre-mRNA processing factor 40 homolog A (yeast) Prpf40a  
1442172\_at 0.93816 Prickle like 1 (Drosophila) Prickle1  
1442173\_at 1.06759 PHD finger protein 3 Phf3  
1442174\_at 1.00141 tetraspanin 18 Tspan18  
1442175\_at 0.86366 RIKEN cDNA C030027H14 gene C030027H14Rik  
1442176\_at 1.00148 AT rich interactive domain 5B (Mrf1 like) Arid5b  
1442177\_at 0.98250 "solute carrier family 6 (neurotransmitter transporter, glycine), member 5 /// similar to Sodium- and chloride-dependent glycine transporter 2 (GlyT2) (GlyT-2) (Solute carrier family 6 member 5)" Slc6a5 /// LOC677366  
1442178\_at 1.07839 "GDP-mannose 4, 6-dehydratase" Gmds  
1442179\_at 1.00700 RIKEN cDNA 9430053O09 gene 9430053O09Rik  
1442180\_at 1.08139 "deleted in lymphocytic leukemia, 7" Dleu7  
1442181\_at 1.88265 Glucocorticoid receptor DNA binding factor 1 Grlf1  
1442182\_at 0.92494 "DnaJ (Hsp40) homolog, subfamily C, member 19" Dnajc19  
1442183\_at 1.16284 similar to carnitine deficiency-associated gene expressed in ventricle 3 isoform CDV3B LOC236069  
1442184\_at 1.14882 "Solute carrier family 24 (sodium/potassium/calcium exchanger), member

## 3" Slc24a3

1442185\_at 1.08666 --- ---  
 1442186\_at 1.07897 ataxin 7 Atxn7  
 1442187\_at 0.96578 "bradykinin receptor, beta 2" Bdkrb2  
 1442188\_at 1.12657 "0 day neonate cerebellum cDNA, RIKEN full-length enriched library, clone:  
 C230031C13 product:unclassifiable, full insert sequence" ---  
 1442189\_at 1.03470 "Pleckstrin homology, Sec7 and coiled-coil domains 1" Pscd1  
 1442190\_at 0.98477 --- ---  
 1442191\_at 0.94056 cDNA sequence AF397014 AF397014  
 1442192\_at 0.97498 thymidylate synthase Tyms  
 1442193\_at 0.88456 RIKEN cDNA A430028G04 gene A430028G04Rik  
 1442194\_at 1.90229 expressed sequence AU018552 AU018552  
 1442195\_at 0.97662 expressed sequence BB283564 BB283564  
 1442196\_at 0.90058 RIKEN cDNA A930006K02 gene A930006K02Rik  
 1442197\_at 1.20831 expressed sequence AI480624 AI480624  
 1442198\_at 1.63829 NIMA (never in mitosis gene a)-related expressed kinase 7 Nek7  
 1442199\_at 0.98894 butyrophilin-like 2 Btnl2  
 1442200\_at 1.06636 RIKEN cDNA 1810063B07 gene 1810063B07Rik  
 1442201\_at 0.94929 Transcribed locus ---  
 1442202\_at 0.87570 RIKEN cDNA 6430706D22 gene 6430706D22Rik  
 1442203\_at 0.86931 hypothetical LOC552880 LOC552880  
 1442204\_at 1.03468 Pannexin 2 Panx2  
 1442205\_at 0.99339 "Adult retina cDNA, RIKEN full-length enriched library, clone:A930031I16  
 product:unclassifiable, full insert sequence" ---  
 1442206\_at 0.98590 MAM domain containing 1 Mamdc1  
 1442207\_at 0.93422 Autophagy related 16 like 2 (S. cerevisiae) Atg16l2  
 1442208\_at 0.88131 "Sodium channel, voltage-gated, type VIII, alpha" Scn8a  
 1442209\_at 0.92790 "7 days neonate cerebellum cDNA, RIKEN full-length enriched library, clone:  
 A730047K09 product:unclassifiable, full insert sequence" ---  
 1442210\_at 0.95687 RIKEN cDNA 1700058C01 gene 1700058C01Rik  
 1442211\_at 0.99903 expressed sequence C78893 C78893  
 1442212\_at 0.94577 carboxypeptidase D Cpd  
 1442213\_at 1.02842 hypothetical LOC552908 LOC552908  
 1442214\_at 1.72942 Nuclear factor I/B Nfib  
 1442215\_at 1.03639 smoothed homolog (Drosophila) Smo  
 1442216\_at 1.31363 "ATPase, H+ transporting, lysosomal V0 subunit D1" Atp6v0d1  
 1442217\_at 1.23718 "DnaJ (Hsp40) homolog, subfamily B, member 6" Dnajb6  
 1442218\_at 0.96316 mitogen-activated protein kinase kinase kinase 9 Map3k9  
 1442219\_at 0.94342 "Membrane-spanning 4-domains, subfamily A, member 4B" Ms4a4b  
 1442220\_at 1.02404 --- ---  
 1442221\_at 0.97264 Secretion regulating guanine nucleotide exchange factor Sergef  
 1442222\_at 1.43979 interferon (alpha and beta) receptor 1 Ifnar1  
 1442223\_at 1.85646 Enabled homolog (Drosophila) Enah

|                                |         |                                                                           |                                    |
|--------------------------------|---------|---------------------------------------------------------------------------|------------------------------------|
| 1442224_at                     | 1.16947 | "Pleckstrin homology domain containing, family A member 6"                | Plekha6                            |
| 1442225_at                     | 0.88318 | Cell division cycle 2-like 6 (CDK8-like)                                  | Cdc216                             |
| 1442226_at                     | 0.93939 | hypothetical protein 6430702L12                                           | 6430702L12                         |
| 1442227_at                     | 1.05272 | "Adaptor protein complex AP-2, mu1"                                       | Ap2m1                              |
| 1442228_at                     | 0.96870 | RIKEN cDNA D630036G22 gene                                                | D630036G22Rik                      |
| 1442229_at                     | 0.91469 | Paired box gene 9                                                         | Pax9                               |
| 1442230_at                     | 0.90353 | ---                                                                       | ---                                |
| 1442231_at                     | 1.13788 | expressed sequence AI616248                                               | AI616248                           |
| 1442232_at                     | 1.02752 | RIKEN cDNA C530025M09 gene                                                | C530025M09Rik                      |
| 1442233_at                     | 0.94784 | Prohibitin                                                                | Phb                                |
| 1442234_at                     | 0.92302 | hypothetical protein LOC667085                                            | LOC667085                          |
| 1442235_at                     | 1.12525 | Pleiomorphic adenoma gene-like 2                                          | Plagl2                             |
| 1442236_at                     | 0.93983 | "zinc finger, AN1-type domain 6"                                          | Zfand6                             |
| 1442237_at                     | 0.86945 | Sequestosome 1                                                            | Sqstm1                             |
| 1442238_a_at                   | 1.03892 | kinesin family member 6                                                   | Kif6                               |
| 1442239_at                     | 1.12070 | "Tumor necrosis factor, alpha-induced protein 8"                          | Tnfaip8                            |
| 1442240_at                     | 1.09936 | "Ctr9, Paf1/RNA polymerase II complex component, homolog (S. cerevisiae)" | Ctr9                               |
| 1442241_at                     | 1.26996 | Serine/arginine-rich protein specific kinase 2                            | Srpk2                              |
| 1442242_at                     | 0.98881 | expressed sequence C79127                                                 | C79127                             |
| 1442243_at                     | 1.28540 | period homolog 3 (Drosophila)                                             | Per3                               |
| 1442244_at                     | 0.93593 | InaD-like (Drosophila)                                                    | Inadl                              |
| 1442245_at                     | 0.96863 | Protein arginine N-methyltransferase 4                                    | Prmt4                              |
| 1442246_at                     | 1.06269 | hypothetical protein LOC668224                                            | /// hypothetical protein LOC669738 |
| hypothetical protein LOC676027 |         | LOC668224                                                                 | /// LOC669738                      |
| 1442247_at                     | 1.08295 | ---                                                                       | ---                                |
| 1442248_at                     | 1.84304 | Triple functional domain (PTPRF interacting)                              | Trio                               |
| 1442249_at                     | 0.80039 | Transcribed locus                                                         | ---                                |
| 1442250_at                     | 1.29255 | X-ray repair complementing defective repair in Chinese hamster cells 6    | Xrcc6                              |
| 1442251_at                     | 1.02251 | valosin containing protein (p97)/p47 complex interacting protein 1        | Vcpi1                              |
| 1442252_at                     | 1.13544 | kinesin family member 13A                                                 | Kif13a                             |
| 1442253_at                     | 0.97520 | ---                                                                       | ---                                |
| 1442254_at                     | 1.14856 | "Diacylglycerol kinase, delta"                                            | Dgkd                               |
| 1442255_at                     | 1.32983 | RIKEN cDNA 5033414D02 gene                                                | 5033414D02Rik                      |
| 1442256_at                     | 1.55780 | "protein kinase C, delta"                                                 | Prkcd                              |
| 1442257_at                     | 0.50478 | RIKEN cDNA B130021B11 gene                                                | B130021B11Rik                      |
| 1442258_at                     | 1.20335 | ---                                                                       | ---                                |
| 1442259_at                     | 1.05714 | ---                                                                       | ---                                |
| 1442260_at                     | 0.92410 | Cdc42 binding protein kinase alpha                                        | Cdc42bpa                           |
| 1442261_at                     | 1.00070 | G protein-coupled receptor 150                                            | Gpr150                             |
| 1442262_at                     | 0.94643 | ---                                                                       | ---                                |
| 1442263_at                     | 0.94845 | regulator of G-protein signaling 13                                       | Rgs13                              |
| 1442264_at                     | 0.82412 | "RAS, guanyl releasing protein 2"                                         | Rasgrp2                            |

1442265\_at 0.88128 "Fanconi anemia, complementation group C" FancC  
1442266\_at 0.97523 expressed sequence AI662175 AI662175  
1442267\_at 1.08347 syntaxin binding protein 4 Stxbp4  
1442268\_a\_at 1.06542 "Adult male epididymis cDNA, RIKEN full-length enriched library, clone:9230001K01 product:unclassifiable, full insert sequence" ---  
1442269\_at 1.07216 "Adult male epididymis cDNA, RIKEN full-length enriched library, clone:9230001K01 product:unclassifiable, full insert sequence" ---  
1442270\_at 1.91402 Pre B-cell leukemia transcription factor 3 Pbx3  
1442271\_at 1.15263 Cytoskeleton associated protein 5 Ckap5  
1442272\_at 0.91374 Transcribed locus ---  
1442273\_at 1.04068 RIKEN cDNA 4932413O14 gene 4932413O14Rik  
1442274\_at 0.87772 "zinc finger, DHHC domain containing 15" Zdhhc15  
1442275\_at 0.97766 RIKEN cDNA 4933402J07 gene 4933402J07Rik  
1442276\_at 1.00055 Latrophilin 3 Lphn3  
1442277\_at 2.01496 choline kinase alpha Chka  
1442278\_at 1.02478 "Jumonji, AT rich interactive domain 1B (Rbp2 like)" Jarid1b  
1442279\_at 1.60905 Enhancer of polycomb homolog 1 (Drosophila) Epc1  
1442280\_at 1.09387 "DNA segment, Chr 2, ERATO Doi 750, expressed" D2Ertd750e  
1442281\_at 0.91632 "DNA segment, Chr 4, ERATO Doi 796, expressed" D4Ertd796e  
1442282\_at 1.05506 "Similar to vomeronasal 2, receptor, 2" LOC625068  
1442283\_at 1.04274 Phosphoglycerate dehydrogenase like 1 Phgdh1  
1442284\_at 0.92455 --- ---  
1442285\_at 1.27163 synaptic nuclear envelope 2 Syne2  
1442286\_at 1.18914 WD repeat domain 67 Wdr67  
1442287\_at 0.99050 Transcribed locus ---  
1442288\_at 1.12040 Annexin A6 Anxa6  
1442289\_at 1.12492 Josephin domain containing 3 Jsd3  
1442290\_at 0.89697 --- ---  
1442291\_at 0.97070 "endothelial differentiation, lysophosphatidic acid G-protein-coupled receptor 4" Edg4  
1442292\_at 0.99966 Rac/Cdc42 guanine nucleotide exchange factor (GEF) 6 Arhgef6  
1442293\_at 0.94187 Transcribed locus ---  
1442294\_at 0.99912 RIKEN cDNA A530053G22 gene A530053G22Rik  
1442295\_at 1.63233 "Actin related protein 2/3 complex, subunit 2" Arpc2  
1442296\_at 1.08475 WD repeat domain 75 Wdr75  
1442297\_at 0.90227 expressed sequence BB212172 BB212172  
1442298\_at 1.56127 Bicaudal C homolog 1 (Drosophila) Bicc1  
1442299\_at 1.05960 --- ---  
1442300\_at 1.01079 --- ---  
1442301\_at 0.92516 expressed sequence AW060742 AW060742  
1442302\_at 1.48810 N-methylpurine-DNA glycosylase Mpg  
1442303\_at 1.01132 "10, 11 days embryo whole body cDNA, RIKEN full-length enriched library, clone:2810048J24 product:unclassifiable, full insert sequence" ---

1442304\_at 0.99034 "16 days neonate heart cDNA, RIKEN full-length enriched library, clone:  
 D830044D09 product:unclassifiable, full insert sequence" ---  
 1442305\_at 1.12789 GTP binding protein 2 Gtpbp2  
 1442306\_at 1.05202 Transcribed locus ---  
 1442307\_at 0.81981 Transcribed locus ---  
 1442308\_at 1.11880 SET and MYND domain containing 4 Smyd4  
 1442309\_at 1.08140 DNA methyltransferase 3A Dnmt3a  
 1442310\_at 1.18800 "Phosphatidylinositol-4-phosphate 5-kinase, type II, alpha" Pip5k2a  
 1442311\_at 3.24750 Zinc finger RNA binding protein Zfr  
 1442312\_at 0.93710 transducin (beta)-like 1X-linked receptor 1 Tbl1xr1  
 1442313\_at 0.92251 RIKEN cDNA 4933400E14 gene 4933400E14Rik  
 1442314\_at 0.90046 nucleoporin 188 Nup188  
 1442315\_at 1.03231 expressed sequence AI426778 AI426778  
 1442316\_x\_at 1.03915 transformation related protein 53 binding protein 1 Trp53bp1  
 1442317\_at 1.54119 T-complex protein 1 Tcp1  
 1442318\_at 1.13281 Transcribed locus ---  
 1442319\_at 0.95907 ubiquitin specific peptidase 4 (proto-oncogene) Usp4  
 1442320\_at 2.97558 hypothetical LOC553096 LOC553096  
 1442321\_at 0.92627 COMM domain containing 2 Commd2  
 1442322\_at 1.03252 Slit homolog 2 (Drosophila) Slit2  
 1442323\_at 0.98011 RIKEN cDNA 2410193C02 gene 2410193C02Rik  
 1442324\_at 1.01892 "PREDICTED: Mus musculus hypothetical LOC547070 (LOC547070),  
 mRNA" ---  
 1442325\_at 0.97168 "TBC1 domain family, member 24" Tbc1d24  
 1442326\_at 0.99093 protocadherin 15 Pcdh15  
 1442327\_at 0.89651 RIKEN cDNA 4930482J15 gene 4930482J15Rik  
 1442328\_at 0.95060 --- ---  
 1442329\_at 1.07053 "DNA cross-link repair 1A, PSO2 homolog (S. cerevisiae)" Dclre1a  
 1442330\_at 1.14110 Serine/arginine repetitive matrix 1 Srrm1  
 1442331\_at 1.03366 Aminolevulinic acid synthase 1 Alas1  
 1442332\_at 1.07884 "Transforming growth factor, beta receptor III" Tgfbr3  
 1442333\_a\_at 0.94952 "sodium channel, voltage-gated, type IX, alpha /// similar to sodium channel  
 25" Scn9a /// LOC671835  
 1442334\_at 0.88761 PRAME family member LOC545693 MGC118150  
 1442335\_at 1.04557 Transcribed locus ---  
 1442336\_at 1.07284 --- ---  
 1442337\_at 1.03890 Adenylate cyclase activating polypeptide 1 receptor 1 Adcyap1r1  
 1442338\_at 1.19445 Transcribed locus ---  
 1442339\_at 1.00610 stefin A2 like 1 Stfa2l1  
 1442340\_x\_at 0.78496 cysteine rich protein 61 Cyr61  
 1442341\_at 0.93413 "kalirin, RhoGEF kinase" Kalrn  
 1442342\_at 0.96462 trans-acting transcription factor 6 Sp6  
 1442343\_at 0.91784 Thioredoxin domain containing 11 Txndc11

1442344\_at 1.07472 AP1 gamma subunit binding protein 1 Ap1gbp1  
1442345\_at 1.07841 RIKEN cDNA 1700031L13 gene 1700031L13Rik  
1442346\_at 1.00072 Transcribed locus ---  
1442347\_at 1.09861 "low density lipoprotein receptor-related protein 8, apolipoprotein e receptor"  
Lrp8  
1442348\_at 1.05068 --- ---  
1442349\_at 1.21509 RIKEN cDNA C630028N24 gene C630028N24Rik  
1442350\_at 1.46060 "0 day neonate skin cDNA, RIKEN full-length enriched library,  
clone:4632424N07 product:unclassifiable, full insert sequence" ---  
1442351\_a\_at 1.02035 cDNA sequence BC029214 BC029214  
1442352\_at 0.99441 RIKEN cDNA 9430091N11 gene 9430091N11Rik  
1442353\_at 0.91465 inosine triphosphatase (nucleoside triphosphate pyrophosphatase) Itpa  
1442354\_at 0.93614 RIKEN cDNA B230325K18 gene B230325K18Rik  
1442355\_at 0.99140 hypothetical LOC546100 LOC546100  
1442356\_at 1.04917 MAX gene associated Mga  
1442357\_at 1.05882 Rho guanine nucleotide exchange factor (GEF) 17 Arhgef17  
1442358\_at 1.76116 expressed sequence AA409587 AA409587  
1442359\_at 1.03663 six transmembrane epithelial antigen of prostate 2 Steap2  
1442360\_at 1.00973 Autism susceptibility candidate 2 Auts2  
1442361\_at 1.02103 Integrin alpha 2b Itga2b  
1442362\_at 0.97559 "gene model 104, (NCBI)" Gm104  
1442363\_at 1.11549 RIKEN cDNA 1110012J17 gene 1110012J17Rik  
1442364\_at 1.09496 Mitogen activated protein kinase 14 Mapk14  
1442365\_at 1.72271 Reticulon 3 Rtn3  
1442366\_at 1.09499 RIKEN cDNA 6820408C15 gene 6820408C15Rik  
1442367\_at 0.87583 "Atpase, class VI, type 11C" Atp11c  
1442368\_at 0.92332 potassium channel tetramerisation domain containing 12b Kctd12b  
1442369\_at 1.03689 RIKEN cDNA 4832406H04 gene 4832406H04Rik  
1442370\_at 1.00918 "10 days neonate cortex cDNA, RIKEN full-length enriched library, clone:  
A830028E23 product:unclassifiable, full insert sequence" ---  
1442371\_at 0.84155 RIKEN cDNA 1110048D14 gene 1110048D14Rik  
1442372\_at 0.93378 Transcribed locus ---  
1442373\_at 0.98933 RIKEN cDNA 2610203C20 gene 2610203C20Rik  
1442374\_at 1.07980 "DNA segment, Chr 2, ERATO Doi 127, expressed" D2Ertd127e  
1442375\_at 1.36612 Ubiquitin-associated protein 2 Ubap2  
1442376\_at 1.06079 actin-binding LIM protein 1 Ablim1  
1442377\_at 1.06566 "Adult male corpora quadrigemina cDNA, RIKEN full-length enriched library,  
clone:B230366E07 product:unclassifiable, full insert sequence" ---  
1442378\_x\_at 1.19910 "In vitro fertilized eggs cDNA, RIKEN full-length enriched library,  
clone:7420405G17 product:unclassifiable, full insert sequence" ---  
1442379\_at 1.03157 hypothetical protein LOC574403 MGC99845  
1442380\_at 1.09374 lipocalin 4 Lcn4  
1442381\_at 2.41477 "Muskelin 1, intracellular mediator containing kelch motifs" Mkl1



|            |         |                                                                                                                                 |               |
|------------|---------|---------------------------------------------------------------------------------------------------------------------------------|---------------|
| 1442382_at | 1.33692 | microtubule associated serine/threonine kinase family member 4                                                                  | Mast4         |
| 1442383_at | 1.38649 | TRIO and F-actin binding protein                                                                                                | Triobp        |
| 1442384_at | 1.00788 | "G elongation factor, mitochondrial 2"                                                                                          | Gfm2          |
| 1442385_at | 1.14149 | Methionine sulfoxide reductase A                                                                                                | Msra          |
| 1442386_at | 0.97559 | RIKEN cDNA C030010B13 gene                                                                                                      | C030010B13Rik |
| 1442387_at | 1.00953 | Histidyl-tRNA synthetase                                                                                                        | Hars          |
| 1442388_at | 0.91817 | RIKEN cDNA 2410137F16 gene                                                                                                      | 2410137F16Rik |
| 1442389_at | 0.97494 | 2'-5' oligoadenylate synthetase 1F                                                                                              | Oas1f         |
| 1442390_at | 1.04020 | Transcribed locus                                                                                                               | ---           |
| 1442391_at | 0.95837 | RIKEN cDNA 4930519H02 gene                                                                                                      | 4930519H02Rik |
| 1442392_at | 0.95164 | "0 day neonate thymus cDNA, RIKEN full-length enriched library, clone: A430024M08 product:unclassifiable, full insert sequence" | ---           |
| 1442393_at | 1.16547 | Zinc finger homeobox 1b                                                                                                         | Zfhx1b        |
| 1442394_at | 0.97333 | "0 day neonate thymus cDNA, RIKEN full-length enriched library, clone: A430024H08 product:unclassifiable, full insert sequence" | ---           |
| 1442395_at | 1.45564 | Dystonin                                                                                                                        | Dst           |
| 1442396_at | 1.05733 | RIKEN cDNA A730020M07 gene                                                                                                      | A730020M07Rik |
| 1442397_at | 0.98159 | "nuclear transcription factor, X-box binding 1"                                                                                 | Nfx1          |
| 1442398_at | 0.98326 | ubiquitin-conjugating enzyme E2T (putative)                                                                                     | Ube2t         |
| 1442399_at | 0.99138 | 5'-3' exoribonuclease 1                                                                                                         | Xrn1          |
| 1442400_at | 1.15838 | Prickle like 1 (Drosophila)                                                                                                     | Prickle1      |
| 1442401_at | 1.11888 | Sorbin and SH3 domain containing 1                                                                                              | Sorbs1        |
| 1442402_at | 0.99898 | SH3 domain containing ring finger 1                                                                                             | Sh3rf1        |
| 1442403_at | 1.05818 | RIKEN cDNA B130034C11 gene                                                                                                      | B130034C11Rik |
| 1442404_at | 0.96571 | nucleolin                                                                                                                       | Ncl           |
| 1442405_at | 0.94737 | Cysteine and glycine-rich protein 2 binding protein                                                                             | Csrp2bp       |
| 1442406_at | 0.98159 | RIKEN cDNA 9230104K21 gene                                                                                                      | 9230104K21Rik |
| 1442407_at | 0.99822 | ---                                                                                                                             | ---           |
| 1442408_at | 0.84270 | RIKEN cDNA 2010305B15 gene                                                                                                      | 2010305B15Rik |
| 1442409_at | 1.03465 | "DNA segment, Chr 9, Wayne State University 90, expressed"                                                                      | D9Wsu90e      |
| 1442410_at | 1.08199 | DEP domain containing 5                                                                                                         | Depdc5        |
| 1442411_at | 0.99619 | Glucocorticoid induced transcript 1                                                                                             | Glcci1        |
| 1442412_at | 0.81971 | "dynein, axonemal, heavy chain 9"                                                                                               | Dnahc9        |
| 1442413_at | 1.17436 | "potassium voltage-gated channel, shaker-related subfamily, member 1"                                                           | Kcna1         |
| 1442414_at | 1.07991 | Ring finger protein 103                                                                                                         | Rnf103        |
| 1442415_at | 0.89530 | RIKEN cDNA 5830454E08 gene                                                                                                      | 5830454E08Rik |
| 1442416_at | 1.33092 | hypothetical protein D930001B02                                                                                                 | D930001B02    |
| 1442417_at | 1.01353 | "mediator of RNA polymerase II transcription, subunit 8 homolog (yeast)"                                                        | Med8          |
| 1442418_at | 1.82480 | RIKEN cDNA B930096F20 gene                                                                                                      | B930096F20Rik |
| 1442419_at | 1.01032 | Transcribed locus                                                                                                               | ---           |
| 1442420_at | 1.15197 | Like-glycosyltransferase                                                                                                        | Large         |
| 1442421_at | 1.07050 | ---                                                                                                                             | ---           |

1442422\_at 1.60046 Transmembrane protein 55A Tmem55a  
1442423\_at 0.99216 Neurexin III Nrnx3  
1442424\_at 0.96969 "CTD (carboxy-terminal domain, RNA polymerase II, polypeptide A) small phosphatase like 2" Ctdspl2  
1442425\_at 1.09618 RIKEN cDNA A030014E15 gene A030014E15Rik  
1442426\_at 0.93968 wings apart-like homolog (Drosophila) Wapal  
1442427\_at 1.27952 RIKEN cDNA 9630026M06 gene 9630026M06Rik  
1442428\_at 0.94656 "Adult male hypothalamus cDNA, RIKEN full-length enriched library, clone: A230084D06 product:unclassifiable, full insert sequence" ---  
1442429\_at 1.11325 "Adaptor protein complex AP-2, mu1" Ap2m1  
1442430\_at 0.92722 cDNA sequence BC048562 BC048562  
1442431\_at 0.97744 Transcribed locus ---  
1442432\_x\_at 0.88880 ataxin 7-like 1 Atxn7l1  
1442433\_at 1.07292 --- ---  
1442434\_at 0.69580 "DNA segment, Chr 8, ERATO Doi 82, expressed" D8Ertd82e  
1442435\_at 1.87888 "Smg-6 homolog, nonsense mediated mRNA decay factor (C. elegans)" Smg6  
1442436\_at 0.90472 fructosamine 3 kinase Fn3k  
1442437\_at 0.98463 PTK2 protein tyrosine kinase 2 beta Ptk2b  
1442438\_at 0.95805 --- ---  
1442439\_at 0.95844 expressed sequence W91776 W91776  
1442440\_at 0.97952 Neuronal d4 domain family member Neud4  
1442441\_at 1.00890 "DNA segment, Chr 11, Brigham & Women's Genetics 0434 expressed" D11Bwg0434e  
1442442\_at 1.14678 THO complex 7 homolog (Drosophila) Thoc7  
1442443\_at 1.00897 Retinoblastoma binding protein 4 Rbbp4  
1442444\_at 1.07041 DEAD (Asp-Glu-Ala-Asp) box polypeptide 19b Ddx19b  
1442445\_at 1.12528 RIKEN cDNA 2610027H17 gene 2610027H17Rik  
1442446\_at 1.03029 Zinc finger protein 523 Zfp523  
1442447\_at 0.94270 --- ---  
1442448\_at 1.01206 RIKEN cDNA 1810064F22 gene 1810064F22Rik  
1442449\_at 1.06850 "solute carrier family 6 (neurotransmitter transporter, noradrenalin), member 2" Slc6a2  
1442450\_at 0.94468 "DNA segment, Chr 2, ERATO Doi 501, expressed" D2Ertd501e  
1442451\_at 0.95819 Tetratricopeptide repeat domain 15 Ttc15  
1442452\_at 0.99942 "amyotrophic lateral sclerosis 2 (juvenile) chromosome region, candidate 2 (human)" Als2cr2  
1442453\_at 1.73429 FCH domain only 2 Fcho2  
1442454\_at 1.43981 topoisomerase (DNA) II alpha Top2a  
1442455\_at 1.18438 expressed sequence C79845 C79845  
1442456\_at 1.03029 spermatogenesis associated 5 Spata5  
1442457\_at 0.86720 --- ---  
1442458\_at 0.91054 Transcribed locus ---

1442459\_at 0.93591 "a disintegrin-like and metallopeptidase (reprolysin type) with thrombospondin type 1 motif, 19" Adamts19

1442460\_at 0.96565 --- ---

1442461\_at 1.03726 glucose-fructose oxidoreductase domain containing 1 Gfod1

1442462\_at 1.02131 expressed sequence C87042 C87042

1442463\_at 1.05191 "RAB10, member RAS oncogene family" Rab10

1442464\_at 1.01519 F-box and leucine-rich repeat protein 20 Fbxl20

1442465\_s\_at 0.89992 spermatid perinuclear RNA binding protein Strbp

1442466\_a\_at 0.96513 histidine acid phosphatase domain containing 2A Hisppd2a

1442467\_at 1.06131 RIKEN cDNA 5330421F07 gene 5330421F07Rik

1442468\_at 1.15849 "0 day neonate thymus cDNA, RIKEN full-length enriched library, clone: A430088L10 product:unclassifiable, full insert sequence" ---

1442469\_at 1.00217 --- ---

1442470\_at 1.92696 --- ---

1442471\_at 1.04504 Eph receptor B2 Ephb2

1442472\_at 0.92101 Tetratricopeptide repeat domain 21A ttc21a

1442473\_at 2.48532 --- ---

1442474\_at 0.93845 --- ---

1442475\_at 1.14582 "DNA segment, Chr 14, ERATO Doi 574, expressed" D14Ertd574e

1442476\_at 0.98873 Intraflagellar transport 81 homolog (Chlamydomonas) Ift81

1442477\_at 1.13537 --- ---

1442478\_at 1.05182 --- ---

1442479\_at 1.01256 "10 days neonate cortex cDNA, RIKEN full-length enriched library, clone: A830040F21 product:unclassifiable, full insert sequence" ---

1442480\_at 0.89281 Transcribed locus ---

1442481\_at 0.91854 hypothetical protein LOC675578 LOC675578

1442482\_at 0.94637 RIKEN cDNA 1700106N22 gene 1700106N22Rik

1442483\_at 1.11551 Fucosyltransferase 8 Fut8

1442484\_at 2.08246 "DNA segment, Chr 9, ERATO Doi 306, expressed" D9Ertd306e

1442485\_at 0.92068 --- ---

1442486\_at 1.15622 --- ---

1442487\_at 0.91716 "DNA segment, Chr 14, ERATO Doi 24, expressed" D14Ertd24e

1442488\_at 0.95334 Glypican 5 Gpc5

1442489\_at 1.15835 "DNA segment, Chr 1, ERATO Doi 564, expressed" D1Ertd564e

1442490\_at 1.03729 RIKEN cDNA C130090I23 gene C130090I23Rik

1442491\_at 1.10974 Dipeptidylpeptidase 10 Dpp10

1442492\_at 1.10252 "DNA segment, Chr X, ERATO Doi 11, expressed" DXErtd11e

1442493\_at 1.08456 Transcribed locus ---

1442494\_at 1.79748 Ubiquitin protein ligase E3 component n-recognin 2 Ubr2

1442495\_at 1.17290 Baculoviral IAP repeat-containing 6 Birc6

1442496\_at 1.14117 Cyclin-dependent kinase-like 3 Cdkl3

1442497\_at 1.14384 SMC hinge domain containing 1 Smchd1

1442498\_at 1.19616 EST C78662 C78662

1442499\_at 1.14943 carnitine deficiency-associated gene expressed in ventricle 3 Cdv3  
1442500\_at 0.88132 expressed sequence C77406 C77406  
1442501\_at 1.02848 neurexin I Nrnx1  
1442502\_at 0.99164 leucine-rich repeats and calponin homology (CH) domain containing 1 Lrch1  
1442503\_at 0.84181 --- ---  
1442504\_at 0.96431 "DNA segment, Chr 18, ERATO Doi 653, expressed" D18Ertd653e  
1442505\_at 1.48728 Fibronectin type III domain containing 3B Fndc3b  
1442506\_at 0.97118 Transcribed locus ---  
1442507\_at 1.15624 whirlin Whrn  
1442508\_at 1.10808 RIKEN cDNA 4933404M19 gene /// similar to hypothetical protein  
MGC39650 /// similar to proline-rich cyclin A1-interacting protein 4933404M19Rik /// RP23-  
185A18.6 /// LOC216974  
1442509\_at 2.14001 Ecotropic viral integration site 5 Evi5  
1442510\_at 1.19827 hypothetical protein LOC665792 /// hypothetical protein LOC669957 ///  
hypothetical protein LOC674416 LOC665792 /// LOC669957 /// LOC674416  
1442511\_at 1.53929 importin 7 Ipo7  
1442512\_at 1.43588 CDC42 effector protein (Rho GTPase binding) 1 Cdc42ep1  
1442513\_at 1.14384 cDNA sequence BC016423 /// similar to cDNA sequence BC016423  
BC016423 /// LOC669774  
1442514\_a\_at 0.90117 elongation factor RNA polymerase II-like 3 Ell3  
1442515\_at 1.07444 --- ---  
1442516\_at 0.96273 "DNA segment, Chr 2, ERATO Doi 623, expressed" D2Ertd623e  
1442517\_a\_at 1.04267 RIKEN cDNA 9630013A20 gene 9630013A20Rik  
1442518\_at 0.93882 RIKEN cDNA C030044O21 gene C030044O21Rik  
1442519\_at 0.91607 Dendritic cell protein GA17 Ga17  
1442520\_at 1.02439 RIKEN cDNA 5730509C05 gene 5730509C05Rik  
1442521\_at 1.15320 "Adult male testis cDNA, RIKEN full-length enriched library,  
clone:4930568O12 product:unclassifiable, full insert sequence" ---  
1442522\_at 0.99683 --- ---  
1442523\_at 1.00980 similar to Nucleolar phosphoprotein p130 (Nucleolar 130 kDa protein) (140  
kDa nucleolar phosphoprotein) (Nopp140) (Nucleolar and coiled-body phosphoprotein 1) LOC331392  
1442524\_at 1.10052 Transcribed locus ---  
1442525\_at 0.93305 Transcribed locus ---  
1442526\_at 0.89674 expressed sequence C77681 C77681  
1442527\_at 0.97530 expressed sequence C87583 C87583  
1442528\_at 1.20635 exportin 4 Xpo4  
1442529\_at 0.92387 Opioid growth factor receptor-like 1 Ogfr1  
1442530\_at 0.93817 --- ---  
1442531\_at 1.37756 "DNA segment, Chr 12, ERATO Doi 123, expressed" D12Ertd123e  
1442532\_at 1.11987 --- ---  
1442533\_at 0.92884 "Nuclear receptor subfamily 3, group C, member 2" Nr3c2  
1442534\_at 0.93590 Glycosyltransferase 25 domain containing 2 Glt25d2  
1442535\_at 1.60347 Zinc finger protein 609 Zfp609

1442536\_at 1.01003 hypothetical protein LOC619719 LOC619719  
1442537\_at 1.01111 --- ---  
1442538\_at 1.23326 REST corepressor 3 Rcor3  
1442539\_at 0.93072 "WW, C2 and coiled-coil domain containing 2" Wwc2  
1442540\_at 1.04736 expressed sequence C77609 C77609  
1442541\_at 1.13283 Ornithine decarboxylase antizyme 2 Oaz2  
1442542\_at 0.67018 eyes absent 4 homolog (Drosophila) Eya4  
1442543\_at 1.08324 Testis expressed gene 264 Tex264  
1442544\_at 0.92853 immunoglobulin heavy chain 4 (serum IgG1) Igh-4  
1442545\_at 0.94922 --- ---  
1442546\_at 0.77294 RIKEN cDNA C730027H18 gene C730027H18Rik  
1442547\_at 1.16858 Transcribed locus ---  
1442548\_at 1.43507 Cysteine rich transmembrane BMP regulator 1 (chordin like) Crim1  
1442549\_at 1.18982 muscleblind-like 3 (Drosophila) Mbnl3  
1442550\_at 0.97904 RIKEN cDNA 1110033M05 gene 1110033M05Rik  
1442551\_at 0.93358 --- ---  
1442552\_at 1.09554 "thrombospondin, type I, domain containing 4" Thsd4  
1442553\_at 0.81045 "microtubule-associated protein, RP/EB family, member 2" Mapre2  
1442554\_s\_at 0.94154 "kalirin, RhoGEF kinase" Kalrn  
1442555\_at 1.15772 "potassium voltage-gated channel, Shal-related family, member 3" Kcnd3  
1442556\_at 1.10390 --- ---  
1442557\_at 0.87550 Synaptotagmin I Syt1  
1442558\_at 1.02300 "Adult male hypothalamus cDNA, RIKEN full-length enriched library, clone:  
A230083A21 product:hypothetical protein, full insert sequence" ---  
1442559\_at 1.02483 "10 days neonate cerebellum cDNA, RIKEN full-length enriched library, clone:  
B930020D16 product:hypothetical protein, full insert sequence" ---  
1442560\_at 0.88792 "Adult male testis cDNA, RIKEN full-length enriched library,  
clone:4933433O05 product:unclassifiable, full insert sequence" ---  
1442561\_at 1.05350 MAM domain containing 1 Mamdc1  
1442562\_at 0.84291 RIKEN cDNA D630040G17 gene /// similar to zinc finger protein 64  
(predicted) D630040G17Rik /// LOC622675  
1442563\_at 1.04437 Transmembrane protein 8 (five membrane-spanning domains) Tmem8  
1442564\_at 1.01848 --- ---  
1442565\_at 0.92856 protocadherin 10 Pcdh10  
1442566\_at 1.09895 expressed sequence C78878 C78878  
1442567\_at 1.00042 zinc finger and BTB domain containing 24 Zbtb24  
1442568\_at 0.93658 RIKEN cDNA C330002I19 gene C330002I19Rik  
1442569\_at 1.19148 Chaperonin subunit 4 (delta) Cct4  
1442570\_at 1.00879 "Zinc finger, MYM domain containing 1" Zmym1  
1442571\_at 1.02791 "13 days embryo head cDNA, RIKEN full-length enriched library,  
clone:3110033I20 product:hypothetical protein, full insert sequence" ---  
1442572\_at 0.98388 Gamma-aminobutyric acid (GABA(A)) receptor-associated protein-like 1  
Gabarapl1

|              |         |                                                                                         |               |
|--------------|---------|-----------------------------------------------------------------------------------------|---------------|
| 1442573_at   | 0.82737 | RIKEN cDNA A930028L21 gene                                                              | A930028L21Rik |
| 1442574_at   | 0.90739 | "Crystallin, zeta (quinone reductase)-like 1"                                           | Cryz11        |
| 1442575_at   | 1.06071 | ---                                                                                     | ---           |
| 1442576_at   | 0.89340 | CAMP responsive element binding protein 5                                               | Creb5         |
| 1442577_at   | 1.19326 | KIAA0415 protein                                                                        | KIAA0415      |
| 1442578_at   | 1.04346 | ---                                                                                     | ---           |
| 1442579_at   | 1.11273 | RIKEN cDNA 9330111N05 gene                                                              | 9330111N05Rik |
| 1442580_at   | 0.95382 | RIKEN cDNA A530020G20 gene                                                              | A530020G20Rik |
| 1442581_at   | 1.64087 | kinase suppressor of ras 1                                                              | Ksr1          |
| 1442582_at   | 0.93126 | germinal center expressed transcript 2                                                  | Gcet2         |
| 1442583_a_at | 1.08482 | expressed sequence AI854703                                                             | AI854703      |
| 1442584_at   | 1.03612 | ---                                                                                     | ---           |
| 1442585_at   | 0.97954 | RIKEN cDNA B230220N19 gene                                                              | B230220N19Rik |
| 1442586_at   | 0.84151 | suppressor of cytokine signaling 2                                                      | Socs2         |
| 1442587_at   | 0.83671 | ---                                                                                     | ---           |
| 1442588_at   | 1.19547 | "Mus musculus, clone IMAGE:1533345, mRNA"                                               | ---           |
| 1442589_at   | 0.89061 | "Transient receptor potential cation channel, subfamily C, member 5"                    | Trpc5         |
| 1442590_at   | 1.03970 | "tumor necrosis factor receptor superfamily, member 23"                                 | Tnfrsf23      |
| 1442591_at   | 1.01899 | Expressed sequence AW060207                                                             | AW060207      |
| 1442592_at   | 0.98637 | Phosphatidic acid phosphatase type 2 domain containing 3                                | Ppapdc3       |
| 1442593_at   | 1.37290 | ---                                                                                     | ---           |
| 1442594_at   | 1.21322 | Ttk protein kinase                                                                      | Ttk           |
| 1442595_at   | 0.94422 | Expressed sequence C77713                                                               | C77713        |
| 1442596_at   | 0.97453 | kelch domain containing 2                                                               | Klhdc2        |
| 1442597_at   | 1.11349 | expressed sequence C79122                                                               | C79122        |
| 1442598_at   | 0.86435 | Prkr interacting protein 1 (IL11 inducible)                                             | Prkrip1       |
| 1442599_at   | 1.19340 | "Solute carrier family 12 (potassium/chloride transporters), member 9"                  | Slc12a9       |
| 1442600_at   | 0.97585 | ---                                                                                     | ---           |
| 1442601_at   | 1.07279 | glucocorticoid modulatory element binding protein 1                                     | Gmeb1         |
| 1442602_at   | 0.86678 | ---                                                                                     | ---           |
| 1442603_at   | 1.54349 | Polybromo 1                                                                             | Pb1           |
| 1442604_at   | 1.03595 | "excision repair cross-complementing rodent repair deficiency, complementation group 6" | Ercc6         |
| 1442605_at   | 1.05464 | BTB and CNC homology 2                                                                  | Bach2         |
| 1442606_at   | 1.13548 | Dynamin binding protein Dnmbp                                                           |               |
| 1442607_a_at | 0.98496 | ---                                                                                     | ---           |
| 1442608_at   | 0.90301 | layilin                                                                                 | Layn          |
| 1442609_at   | 1.66803 | "Protein kinase C, epsilon"                                                             | Prkce         |
| 1442610_at   | 0.89417 | Plexin domain containing 1                                                              | Plxdc1        |
| 1442611_at   | 1.12667 | RIKEN cDNA 4930592C13 gene                                                              | 4930592C13Rik |
| 1442612_at   | 1.09607 | RIKEN cDNA C730036E19 gene                                                              | C730036E19Rik |
| 1442613_at   | 1.23695 | ---                                                                                     | ---           |
| 1442614_at   | 0.96621 | interleukin 1 receptor accessory protein                                                | Il1rap        |

1442615\_at 0.98967 Adenosine kinase Adk  
1442616\_at 1.11435 GRP1 (general receptor for phosphoinositides 1)-associated scaffold protein  
Grasp  
1442617\_at 1.14553 Core binding factor beta Cbfb  
1442618\_at 0.82220 Lactate dehydrogenase B Ldhb  
1442619\_at 1.08561 Kruppel-like factor 15 Klf15  
1442620\_at 1.06346 RIKEN cDNA 4931420C21 gene 4931420C21Rik  
1442621\_at 1.06357 expressed sequence C77798 C77798  
1442622\_at 1.18678 Spermatid perinuclear RNA binding protein Strbp  
1442623\_at 1.01225 "LysM, putative peptidoglycan-binding, domain containing 4" Lysmd4  
1442624\_at 1.80902 RIKEN cDNA C920008N22 gene C920008N22Rik  
1442625\_at 1.12212 "Pleckstrin homology domain containing, family C (with FERM domain)  
member 1" Plekhc1  
1442626\_at 1.07650 RIKEN cDNA 5730405I09 gene 5730405I09Rik  
1442627\_at 1.02841 --- ---  
1442628\_at 1.03204 "15 days embryo head cDNA, RIKEN full-length enriched library, clone:  
D930002E06 product:hypothetical protein, full insert sequence" ---  
1442629\_at 1.71047 "5'-nucleotidase, cytosolic II" Nt5c2  
1442630\_at 0.97601 Transcribed locus ---  
1442631\_at 0.99324 RIKEN cDNA 2700070H01 gene 2700070H01Rik  
1442632\_at 2.35581 "Centaurin, gamma 2" Centg2  
1442633\_at 1.07846 "Transcribed locus, weakly similar to XP\_576460.1 PREDICTED: similar to  
hypothetical protein PB402898.00.0 [Rattus norvegicus]" ---  
1442634\_at 0.90281 Transcribed locus ---  
1442635\_at 1.05879 "Adult male corpora quadrigemina cDNA, RIKEN full-length enriched library,  
clone:B230312L02 product:unclassifiable, full insert sequence" ---  
1442636\_at 0.98517 CDNA sequence BC004636 BC004636  
1442637\_at 1.03240 Intersectin 1 (SH3 domain protein 1A) Itsn1  
1442638\_at 0.95326 --- ---  
1442639\_at 1.00320 --- ---  
1442640\_at 0.91638 Schlafen 5 Slfn5  
1442641\_at 1.37401 Ankyrin repeat and KH domain containing 1 Ankhd1  
1442642\_at 1.03625 RIKEN cDNA 4930413O22 gene 4930413O22Rik  
1442643\_at 1.05236 jumonji domain containing 3 Jmjd3  
1442644\_at 1.02883 "PREDICTED: Mus musculus hypothetical protein LOC622030 (LOC622030),  
mRNA" ---  
1442645\_at 1.03287 "ATPase, Ca++ transporting, plasma membrane 3" Atp2b3  
1442646\_at 1.00203 B-cell scaffold protein with ankyrin repeats 1 Bank1  
1442647\_at 1.12011 "Yip1 domain family, member 1" Yipf1  
1442648\_at 0.86459 hypothetical protein D130054H01 D130054H01  
1442649\_at 0.96560 RIKEN cDNA 1500009L16 gene 1500009L16Rik  
1442650\_at 1.05247 Transcribed locus ---  
1442651\_at 1.53540 WW domain-containing oxidoreductase Wwox

|              |         |                                                                                                                               |               |
|--------------|---------|-------------------------------------------------------------------------------------------------------------------------------|---------------|
| 1442652_at   | 0.93321 | "gene model 410, (NCBI)"                                                                                                      | Gm410         |
| 1442653_at   | 1.05545 | ---                                                                                                                           | ---           |
| 1442654_at   | 0.89725 | RIKEN cDNA A530054K11 gene                                                                                                    | A530054K11Rik |
| 1442655_at   | 1.07799 | DNA methyltransferase 3B                                                                                                      | Dnmt3b        |
| 1442656_at   | 1.34084 | ---                                                                                                                           | ---           |
| 1442657_at   | 0.95717 | "DNA segment, Chr 1, ERATO Doi 273, expressed"                                                                                | D1Ertd273e    |
| 1442658_at   | 0.99229 | "NADH dehydrogenase (ubiquinone) 1 beta subcomplex, 2"                                                                        | Ndufb2        |
| 1442659_at   | 0.93430 | protocadherin 9 Pcdh9                                                                                                         |               |
| 1442660_at   | 1.02021 | Yippee-like 1 (Drosophila)                                                                                                    | Ypel1         |
| 1442661_at   | 1.21823 | expressed sequence C80113                                                                                                     | C80113        |
| 1442662_at   | 0.96273 | RIKEN cDNA 0610041E09 gene                                                                                                    | 0610041E09Rik |
| 1442663_at   | 0.91447 | ---                                                                                                                           | ---           |
| 1442664_at   | 1.17795 | Muscleblind-like 3 (Drosophila)                                                                                               | Mbnl3         |
| 1442665_at   | 1.06866 | expressed sequence C77874                                                                                                     | C77874        |
| 1442666_at   | 1.09082 | "DNA segment, Chr 9, ERATO Doi 12, expressed"                                                                                 | D9Ertd12e     |
| 1442667_at   | 1.25505 | cell division cycle 40 homolog (yeast)                                                                                        | Cdc40         |
| 1442668_at   | 0.87631 | ---                                                                                                                           | ---           |
| 1442669_at   | 0.97243 | ---                                                                                                                           | ---           |
| 1442670_at   | 0.99860 | RIKEN cDNA 6430517E21 gene                                                                                                    | 6430517E21Rik |
| 1442671_at   | 1.28346 | Huntingtin interacting protein 2                                                                                              | Hip2          |
| 1442672_at   | 1.00320 | RIKEN cDNA 0610040F04 gene                                                                                                    | 0610040F04Rik |
| 1442673_at   | 1.39452 | Signal transducing adaptor molecule (SH3 domain and ITAM motif) 2                                                             | Stam2         |
| 1442674_at   | 1.24324 | F-box and WD-40 domain protein 4                                                                                              | Fbxw4         |
| 1442675_at   | 0.94675 | RIKEN cDNA 2010111I01 gene                                                                                                    | 2010111I01Rik |
| 1442676_at   | 0.89095 | monoamine oxidase A                                                                                                           | Maoa          |
| 1442677_at   | 1.19277 | Transcribed locus                                                                                                             | ---           |
| 1442678_at   | 0.89854 | coiled coil domain containing 28B                                                                                             | Ccdc28b       |
| 1442679_at   | 1.30923 | Mitogen activated protein kinase kinase 4                                                                                     | Map2k4        |
| 1442680_at   | 1.07725 | Neural cell adhesion molecule 1                                                                                               | Ncam1         |
| 1442681_at   | 1.17366 | "TRNA splicing endonuclease 2 homolog (SEN2, S. cerevisiae)"                                                                  | Tsen2         |
| 1442682_at   | 1.36629 | ---                                                                                                                           | ---           |
| 1442683_at   | 1.07140 | high mobility group 20A                                                                                                       | Hmg20a        |
| 1442684_x_at | 1.04566 | high mobility group 20A                                                                                                       | Hmg20a        |
| 1442685_at   | 0.96424 | ---                                                                                                                           | ---           |
| 1442686_at   | 1.00366 | "D4, zinc and double PHD fingers, family 3"                                                                                   | Dpf3          |
| 1442687_at   | 1.02467 | RIKEN cDNA 1700064N11 gene                                                                                                    | 1700064N11Rik |
| 1442688_at   | 0.91477 | ---                                                                                                                           | ---           |
| 1442689_at   | 1.06163 | "DNA segment, Chr 9, ERATO Doi 278, expressed"                                                                                | D9Ertd278e    |
| 1442690_at   | 0.99161 | Transmembrane protein 143                                                                                                     | Tmem143       |
| 1442691_at   | 1.03724 | "0 day neonate lung cDNA, RIKEN full-length enriched library, clone: E030049N05 product:unclassifiable, full insert sequence" | ---           |
| 1442692_at   | 1.32165 | Mitogen-activated protein kinase associated protein 1                                                                         | Mapkap1       |
| 1442693_at   | 0.95306 | similar to tripartite motif protein TRIM5                                                                                     | LOC667823     |



|              |         |                                                                             |               |  |
|--------------|---------|-----------------------------------------------------------------------------|---------------|--|
| 1442694_at   | 0.93811 | ---                                                                         | ---           |  |
| 1442695_at   | 1.00339 | RIKEN cDNA C030007I01 gene                                                  | C030007I01Rik |  |
| 1442696_at   | 1.00788 | 7-dehydrocholesterol reductase                                              | Dhcr7         |  |
| 1442697_at   | 1.17427 | ---                                                                         | ---           |  |
| 1442698_at   | 1.15919 | "7 days neonate cerebellum cDNA, RIKEN full-length enriched library, clone: |               |  |
| A730053D01   |         | product:unclassifiable, full insert sequence"                               | ---           |  |
| 1442699_at   | 0.91914 | ---                                                                         | ---           |  |
| 1442700_at   | 1.07166 | "phosphodiesterase 4B, cAMP specific"                                       | Pde4b         |  |
| 1442701_at   | 0.91646 | ---                                                                         | ---           |  |
| 1442702_at   | 0.90446 | Dorso-medial telencephalon gene 2                                           | Dmt2          |  |
| 1442703_at   | 1.22261 | cDNA sequence AK220484                                                      | AK220484      |  |
| 1442704_at   | 1.80840 | "Bromodomain adjacent to zinc finger domain, 2B"                            | Baz2b         |  |
| 1442705_at   | 1.18584 | expressed sequence C76938                                                   | C76938        |  |
| 1442706_at   | 1.04073 | nasal embryonic LHRH factor                                                 | Nelf          |  |
| 1442707_at   | 1.01378 | calcium/calmodulin-dependent protein kinase II alpha                        | Camk2a        |  |
| 1442708_at   | 0.98157 | "0 day neonate kidney cDNA, RIKEN full-length enriched library, clone:      |               |  |
| D630048D13   |         | product:unclassifiable, full insert sequence"                               | ---           |  |
| 1442709_at   | 1.13168 | Zinc finger protein 521                                                     | Zfp521        |  |
| 1442710_at   | 1.26629 | PDZ and LIM domain 5                                                        | Pdlim5        |  |
| 1442711_at   | 1.00606 | Transcribed locus                                                           | ---           |  |
| 1442712_at   | 0.81645 | "Similar to H3 histone, family 3B"                                          | LOC627894     |  |
| 1442713_at   | 1.01177 | Oxysterol binding protein-like 10                                           | Osbp110       |  |
| 1442714_at   | 0.89010 | hypothetical protein LOC667963                                              | LOC667963     |  |
| 1442715_at   | 1.05693 | ---                                                                         | ---           |  |
| 1442716_at   | 0.94725 | Transcribed locus                                                           | ---           |  |
| 1442717_at   | 1.09092 | "TBC1 domain family, member 13"                                             | Tbc1d13       |  |
| 1442718_at   | 0.94202 | "7 days neonate cerebellum cDNA, RIKEN full-length enriched library, clone: |               |  |
| A730040F03   |         | product:unclassifiable, full insert sequence"                               | ---           |  |
| 1442719_at   | 1.04856 | protein arginine N-methyltransferase 3                                      | Prmt3         |  |
| 1442720_at   | 1.08959 | ---                                                                         | ---           |  |
| 1442721_at   | 0.90734 | Transcribed locus                                                           | ---           |  |
| 1442722_at   | 0.97532 | Transcribed locus                                                           | ---           |  |
| 1442723_at   | 0.97831 | Transcribed locus                                                           | ---           |  |
| 1442724_at   | 0.98431 | expressed sequence AW060763                                                 | AW060763      |  |
| 1442725_at   | 0.85671 | ---                                                                         | ---           |  |
| 1442726_s_at | 1.05429 | expressed sequence AI845619                                                 | AI845619      |  |
| 1442727_at   | 0.92270 | ---                                                                         | ---           |  |
| 1442728_at   | 1.06604 | Nuclear autoantigenic sperm protein (histone-binding)                       | Nasp          |  |
| 1442729_at   | 0.90707 | "DNA segment, Chr 12, ERATO Doi 553, expressed"                             | D12Ertd553e   |  |
| 1442730_at   | 1.02857 | ---                                                                         | ---           |  |
| 1442731_at   | 0.97418 | RIKEN cDNA 9030416H16 gene                                                  | 9030416H16Rik |  |
| 1442732_at   | 1.20841 | ---                                                                         | ---           |  |
| 1442733_at   | 0.86755 | ---                                                                         | ---           |  |

|              |                                                                                                                                                  |               |
|--------------|--------------------------------------------------------------------------------------------------------------------------------------------------|---------------|
| 1442734_at   | 0.98238 --- ---                                                                                                                                  |               |
| 1442735_at   | 1.02801 Ornithine decarboxylase antizyme 2                                                                                                       | Oaz2          |
| 1442736_at   | 0.98947 kelch-like 11 (Drosophila)                                                                                                               | Klhl11        |
| 1442737_at   | 0.77592 Hypothetical protein 4933423E17                                                                                                          | 4.93E+23      |
| 1442738_at   | 1.10246 CAMP responsive element binding protein-like 2                                                                                           | Crebl2        |
| 1442739_at   | 0.87987 cDNA sequence BC031441                                                                                                                   | BC031441      |
| 1442740_at   | 1.10069 --- ---                                                                                                                                  |               |
| 1442741_at   | 0.96448 mutated in colorectal cancers                                                                                                            | Mcc           |
| 1442742_at   | 0.98966 "ATPase, Ca <sup>++</sup> -sequestering"                                                                                                 | Atp2c1        |
| 1442743_at   | 0.92624 "Adult male olfactory brain cDNA, RIKEN full-length enriched library, clone:6430530F17 product:unclassifiable, full insert sequence" --- |               |
| 1442744_at   | 2.91189 expressed sequence C79248                                                                                                                | C79248        |
| 1442745_x_at | 2.16519 expressed sequence C79248                                                                                                                | C79248        |
| 1442746_at   | 0.88381 --- ---                                                                                                                                  |               |
| 1442747_at   | 1.02870 --- ---                                                                                                                                  |               |
| 1442748_at   | 1.03703 BTB (POZ) domain containing 3                                                                                                            | Btbd3         |
| 1442749_at   | 1.16609 Braf transforming gene                                                                                                                   | Braf          |
| 1442750_at   | 1.19230 Transcribed locus                                                                                                                        | ---           |
| 1442751_at   | 0.94621 Triple functional domain (PTPRF interacting)                                                                                             | Trio          |
| 1442752_at   | 1.05986 Opioid binding protein/cell adhesion molecule-like                                                                                       | Opcml         |
| 1442753_at   | 0.94650 "tumor necrosis factor, alpha-induced protein 8"                                                                                         | Tnfaip8       |
| 1442754_at   | 0.90069 RIKEN cDNA C030013G03 gene                                                                                                               | C030013G03Rik |
| 1442755_at   | 0.97519 Transcribed locus                                                                                                                        | ---           |
| 1442756_at   | 0.96635 Linker of T-cell receptor pathways                                                                                                       | Lnk           |
| 1442757_at   | 0.96840 leucine-rich repeats and calponin homology (CH) domain containing 1                                                                      | Lrch1         |
| 1442758_at   | 1.01772 Heterogeneous nuclear ribonucleoprotein A1                                                                                               | Hnrpa1        |
| 1442759_at   | 0.89132 thymoma viral proto-oncogene 1                                                                                                           | Akt1          |
| 1442760_x_at | 2.49097 Reticulon 4                                                                                                                              | Rtn4          |
| 1442761_at   | 1.49684 Tumor protein D52-like 2                                                                                                                 | Tpd52l2       |
| 1442762_at   | 1.01978 "tubulin tyrosine ligase-like family, member 10"                                                                                         | Ttl10         |
| 1442763_s_at | 1.07365 "tubulin tyrosine ligase-like family, member 10"                                                                                         | Ttl10         |
| 1442764_at   | 1.10714 suppressor of variegation 4-20 homolog 1 (Drosophila)                                                                                    | Suv420h1      |
| 1442765_at   | 1.12304 Transcribed locus                                                                                                                        | ---           |
| 1442766_at   | 1.06640 Transcribed locus                                                                                                                        | ---           |
| 1442767_s_at | 1.07827 "ubiquitin-activating enzyme E1, Chr X"                                                                                                  | Ube1x         |
| 1442768_at   | 1.01102 RIKEN cDNA E130112L23 gene                                                                                                               | E130112L23Rik |
| 1442769_at   | 0.98614 RIKEN cDNA 8030451F13 gene                                                                                                               | 8030451F13Rik |
| 1442770_at   | 0.88663 RIKEN cDNA 9530033F24 gene                                                                                                               | 9530033F24Rik |
| 1442771_at   | 1.15453 RAD51-like 1 (S. cerevisiae)                                                                                                             | Rad51l1       |
| 1442772_at   | 0.98890 EH domain binding protein 1                                                                                                              | Ehbp1         |
| 1442773_at   | 1.06106 Transcribed locus                                                                                                                        | ---           |
| 1442774_x_at | 1.05665 Transcribed locus                                                                                                                        | ---           |
| 1442775_at   | 1.53590 Suppression of tumorigenicity 13                                                                                                         | St13          |

1442776\_at 0.96093 RIKEN cDNA 2310009E04 gene 2310009E04Rik  
1442777\_at 1.03247 Transcribed locus ---  
1442778\_at 1.00360 expressed sequence AA511254 AA511254  
1442779\_at 1.00459 RIKEN cDNA 1700071K01 gene 1700071K01Rik  
1442780\_at 1.08617 RIKEN cDNA 2610002J02 gene 2610002J02Rik  
1442781\_at 1.01923 Ferric-chelate reductase 1 Frrs1  
1442782\_at 1.10489 Kelch-like 8 (Drosophila) Khlh8  
1442783\_x\_at 1.07814 "3 days neonate thymus cDNA, RIKEN full-length enriched library, clone: A630030O14 product:unclassifiable, full insert sequence" ---  
1442784\_at 0.87665 Zinc finger protein 608 Zfp608  
1442785\_at 1.50337 SET and MYND domain containing 3 Smyd3  
1442786\_s\_at 1.04833 RUN and FYVE domain containing 3 Rufy3  
1442787\_at 0.87811 --- ---  
1442788\_at 1.03092 RIKEN cDNA 2600003E23 gene 2600003E23Rik  
1442789\_at 1.14624 Transcribed locus ---  
1442790\_at 0.96416 --- ---  
1442791\_x\_at 1.00638 RIKEN cDNA 6720407P12 gene 6720407P12Rik  
1442792\_x\_at 0.83921 RIKEN cDNA 4930471M23 gene 4930471M23Rik  
1442793\_s\_at 1.10813 transforming growth factor beta regulated gene 4 Tbrg4  
1442794\_at 0.98215 "procollagen, type VIII, alpha 1" Col8a1  
1442795\_x\_at 1.00560 RIKEN cDNA 1700016G05 gene 1700016G05Rik  
1442796\_at 0.91755 activating transcription factor 7 interacting protein 2 Atf7ip2  
1442797\_x\_at 0.87047 CKLF-like MARVEL transmembrane domain containing 2A Cmtm2a  
1442798\_x\_at 1.01460 hexokinase 3 Hk3  
1442799\_x\_at 0.99579 NudC domain containing 3 Nudcd3  
1442800\_x\_at 0.98197 RIKEN cDNA A830059I20 gene A830059I20Rik  
1442801\_x\_at 0.96559 transmembrane 7 superfamily member 3 Tm7sf3  
1442802\_x\_at 0.99374 HLA-B associated transcript 2 Bat2  
1442803\_at 1.12500 RAD51-like 3 (S. cerevisiae) Rad51l3  
1442804\_at 0.85249 Gardner-Rasheed feline sarcoma viral (Fgr) oncogene homolog Fgr  
1442805\_at 1.20971 RIKEN cDNA A130086G11 gene A130086G11Rik  
1442806\_at 0.86559 RIKEN cDNA 9430030N17 gene 9430030N17Rik  
1442807\_at 0.92562 --- ---  
1442808\_at 0.88253 "Transcribed locus, weakly similar to XP\_342027.2 PREDICTED: similar to MS4A8B protein [Rattus norvegicus]" ---  
1442809\_at 1.03054 "sodium channel, voltage-gated, type IX, alpha /// similar to sodium channel 25" Scn9a /// LOC671835  
1442810\_x\_at 0.98794 "sodium channel, voltage-gated, type IX, alpha /// similar to sodium channel 25" Scn9a /// LOC671835  
1442811\_at 2.03451 "RGM domain family, member B" Rgmb  
1442812\_at 1.11189 similar to Anapc5 protein LOC433844  
1442813\_at 1.02629 "Diacylglycerol kinase, iota" Dgki  
1442814\_at 1.09501 Glucocorticoid induced transcript 1 Glcci1

1442815\_at 1.01385 Peroxisome biogenesis factor 19 Pex19  
1442816\_at 0.78003 heparan sulfate (glucosamine) 3-O-sulfotransferase 3B1 Hs3st3b1  
1442817\_at 1.09050 RIKEN cDNA A730091E23 gene A730091E23Rik  
1442818\_at 1.06209 hypothetical protein LOC671796 /// hypothetical protein LOC675117  
LOC671796 /// LOC675117  
1442819\_at 1.09886 "rhomboid, veinlet-like 2 (Drosophila)" Rhbdl2  
1442820\_at 1.12050 "Protein tyrosine phosphatase, non-receptor type 22 (lymphoid)" Ptpn22  
1442821\_at 2.07618 Transmembrane 9 superfamily member 3 Tm9sf3  
1442822\_at 1.03513 Calcium/calmodulin-dependent protein kinase IV Camk4  
1442823\_at 0.93251 "0 day neonate eyeball cDNA, RIKEN full-length enriched library, clone:  
E130001F20 product:hypothetical protein, full insert sequence" ---  
1442824\_at 1.01051 RIKEN cDNA 8030497I03 gene 8030497I03Rik  
1442825\_at 1.08850 Golgi reassembly stacking protein 2 Gorasp2  
1442826\_at 1.09648 Ubiquitin specific peptidase 25 Usp25  
1442827\_at 1.00018 Toll-like receptor 4 Tlr4  
1442828\_at 0.93462 Interferon activated gene 203 Ifi203  
1442829\_at 0.99494 Ras and Rab interactor 2 Rin2  
1442830\_at 1.17349 Nucleolar and spindle associated protein 1 Nusap1  
1442831\_at 0.98604 RIKEN cDNA 2900026A02 gene 2900026A02Rik  
1442832\_at 1.00164 ankyrin repeat domain 52 Ankrd52  
1442833\_at 1.16514 "DNA segment, Chr 15, ERATO Doi 30, expressed" D15ErtD30e  
1442834\_at 1.60916 "Protein phosphatase 4, regulatory subunit 2" Ppp4r2  
1442835\_at 0.96918 "0 day neonate lung cDNA, RIKEN full-length enriched library, clone:  
E030050O06 product:unclassifiable, full insert sequence" ---  
1442836\_at 1.06514 exportin 7 Xpo7  
1442837\_at 0.92058 "Protein tyrosine phosphatase, receptor type, D" Ptpnd  
1442838\_at 0.94944 "Adult male testis cDNA, RIKEN full-length enriched library,  
clone:4930532C19 product:hypothetical protein, full insert sequence" ---  
1442839\_at 1.14733 --- ---  
1442840\_at 1.03983 "DNA segment, Chr 4, ERATO Doi 669, expressed" D4ErtD669e  
1442841\_at 1.07681 Tetraspanin 3 Tspan3  
1442842\_at 0.93974 Hspb associated protein 1 Hspbap1  
1442843\_at 1.67966 RIKEN cDNA 4933411D12 gene 4933411D12Rik  
1442844\_at 0.98100 RIKEN cDNA A830052D11 gene A830052D11Rik  
1442845\_at 3.83691 RIKEN cDNA C130075A20 gene C130075A20Rik  
1442846\_at 1.09050 Pre B-cell leukemia transcription factor 1 Pbx1  
1442847\_at 1.10037 --- ---  
1442848\_at 0.94499 3-hydroxyisobutyrate dehydrogenase Hibadh  
1442849\_at 1.36708 low density lipoprotein receptor-related protein 1 Lrp1  
1442850\_at 0.99354 --- ---  
1442851\_at 1.05210 expressed sequence C79818 C79818  
1442852\_at 0.91472 --- ---  
1442853\_at 0.95553 Mitogen-activated protein kinase 8 interacting protein 3 Mapk8ip3

1442854\_at 0.91040 Transcribed locus ---  
1442855\_at 1.14716 dopey family member 1 Dopey1  
1442856\_at 1.12444 adrenomedullin 2 Adm2  
1442857\_at 1.04040 Astrotactin 2 Astn2  
1442858\_at 0.95849 "Pam, highwire, rpm 1" Phr1  
1442859\_at 1.05770 "Sprouty protein with EVH-1 domain 1, related sequence" Spred1  
1442860\_at 0.95826 "diacylglycerol kinase, beta" Dgkb  
1442861\_at 0.96522 CREB regulated transcription coactivator 1 Crtc1  
1442862\_at 1.09850 --- ---  
1442863\_at 0.98277 "calcium channel, voltage-dependent, alpha 2/delta subunit 4" Cacna2d4  
1442864\_at 1.15213 "estrogen related receptor, alpha" Esrra  
1442865\_at 0.97235 diacylglycerol kinase kappa Dgkk  
1442866\_at 1.08568 RCSD domain containing 1 Rcsd1  
1442867\_at 0.99580 --- ---  
1442868\_at 0.86600 RIKEN cDNA C130026L21 gene C130026L21Rik  
1442869\_at 0.86093 docking protein 7 Dok7  
1442870\_at 0.90331 "CDNA, clone:Y2G0105B03, strand:unspecified" ---  
1442871\_at 1.07317 "PREDICTED: Mus musculus similar to Nucleolar transcription factor 1  
(Upstream binding factor 1) (UBF-1) (LOC628897), mRNA" ---  
1442872\_at 1.09441 cDNA sequence BC021438 BC021438  
1442873\_at 0.64779 "10 days neonate cerebellum cDNA, RIKEN full-length enriched library, clone:  
B930049N01 product:unclassifiable, full insert sequence" ---  
1442874\_at 0.98919 Activating signal cointegrator 1 complex subunit 1 Ascc1  
1442875\_at 0.92171 --- ---  
1442876\_at 1.03462 Mitogen activated protein kinase 1 Mapk1  
1442877\_at 0.96475 --- ---  
1442878\_at 1.22366 peroxiredoxin 6 Prdx6  
1442879\_at 1.03822 --- ---  
1442880\_at 1.60960 --- ---  
1442881\_at 1.05884 --- ---  
1442882\_at 1.01684 --- ---  
1442883\_s\_at 0.97590 "DNA segment, Chr 10, Brigham & Women's Genetics 1364 expressed"  
D10Bwg1364e  
1442884\_at 1.10035 hepatocyte growth factor Hgf  
1442885\_at 0.93152 SREBP cleavage activating protein Scap  
1442886\_at 1.73199 transformer 2 alpha homolog (Drosophila) Tra2a  
1442887\_at 1.02487 expressed sequence AI853363 AI853363  
1442888\_at 1.07644 InaD-like (Drosophila) Inadl  
1442889\_at 0.95948 Transcribed locus ---  
1442890\_at 1.29315 Suppressor of cytokine signaling 5 Socs5  
1442891\_at 0.93404 expressed sequence AU023386 AU023386  
1442892\_at 1.47299 Mutated in colorectal cancers Mcc  
1442893\_at 0.99646 "Catenin (cadherin associated protein), alpha 2" Ctnna2

1442894\_at 0.98213 "dynein, axonemal, heavy chain 6" Dnahc6  
1442895\_at 0.99393 "PREDICTED: Mus musculus similar to zinc finger protein 547 (LOC628043), mRNA" ---  
1442896\_at 0.94410 Heat shock protein 12A Hspa12a  
1442897\_at 1.30920 RIKEN cDNA 2610024E20 gene 2610024E20Rik  
1442898\_at 1.01097 hypothetical protein LOC671579 LOC671579  
1442899\_at 0.93429 Transcribed locus ---  
1442900\_at 1.01155 Transcribed locus ---  
1442901\_at 1.34777 Tax1 (human T-cell leukemia virus type I) binding protein 1 Tax1bp1  
1442902\_at 0.96034 glutamine rich 2 Qrich2  
1442903\_at 1.15133 RIKEN cDNA 4732423E21 gene 4732423E21Rik  
1442904\_at 0.91483 similar to RNA (guanine-9-) methyltransferase domain containing 2  
LOC622118  
1442905\_at 0.98454 ADP-ribosylation factor 4 Arf4  
1442906\_at 0.99419 --- ---  
1442907\_at 1.07022 "Adult male aorta and vein cDNA, RIKEN full-length enriched library, clone: A530062L09 product:unclassifiable, full insert sequence" ---  
1442908\_at 0.93324 Transmembrane 9 superfamily member 1 Tm9sf1  
1442909\_at 0.96089 "Potassium voltage-gated channel, subfamily Q, member 4" Kcnq4  
1442910\_at 0.95206 Expressed sequence AL033314 AL033314  
1442911\_at 1.18234 RIO kinase 2 (yeast) Riok2  
1442912\_at 0.92280 "hydroxy-delta-5-steroid dehydrogenase, 3 beta- and steroid delta-isomerase 7" Hsd3b7  
1442913\_at 0.97191 "12 days embryo spinal ganglion cDNA, RIKEN full-length enriched library, clone:D130048N24 product:unclassifiable, full insert sequence" ---  
1442914\_at 0.87112 "Transcribed locus, weakly similar to XP\_858458.1 PREDICTED: hypothetical protein XP\_853365 [Canis familiaris]" ---  
1442915\_at 1.02217 "solute carrier family 9 (sodium/hydrogen exchanger), member 4" Slc9a4  
1442916\_at 2.11065 RIKEN cDNA 4931420C21 gene 4931420C21Rik  
1442917\_at 0.78085 "Adult male vesicular gland cDNA, RIKEN full-length enriched library, clone: G630023F10 product:unclassifiable, full insert sequence" ---  
1442918\_at 0.97225 neuron navigator 3 /// RIKEN cDNA 9630020C08 gene /// region containing RIKEN cDNA 9630020C08 gene; neuron navigator 3 Nav3 /// 9630020C08Rik /// LOC676640  
1442919\_at 1.23009 SH3 and PX domains 2B Sh3pxd2b  
1442920\_at 1.07004 Kruppel-like factor 3 (basic) Klf3  
1442921\_at 1.01092 Matrix metalloproteinase 24 Mmp24  
1442922\_at 0.97207 checkpoint with forkhead and ring finger domains Chfr  
1442923\_at 1.05620 PTK6 protein tyrosine kinase 6 Ptk6  
1442924\_at 0.98692 Calsyntenin 2 Clstn2  
1442925\_at 1.03190 RIKEN cDNA 2610207I05 gene 2610207I05Rik  
1442926\_at 1.05199 RIKEN cDNA 1700011B04 gene 1700011B04Rik  
1442927\_at 0.91496 PTK2 protein tyrosine kinase 2 beta Ptk2b  
1442928\_at 0.98384 Karyopherin (importin) alpha 4 Kpna4

1442929\_at 0.89271 "ST8 alpha-N-acetyl-neuraminide alpha-2,8-sialyltransferase 5" St8sia5  
1442930\_at 0.89644 expressed sequence AW061147 AW061147  
1442931\_at 1.00687 RIKEN cDNA 2600003E23 gene 2600003E23Rik  
1442932\_at 0.98251 expressed sequence C79709 C79709  
1442933\_at 1.20587 forkhead box K2 Foxk2  
1442934\_at 1.09283 expressed sequence C81608 C81608  
1442935\_at 0.81034 expressed sequence C81452 C81452  
1442936\_at 1.01113 Desmoglein 3 Dsg3  
1442937\_at 1.03015 expressed sequence C77190 C77190  
1442938\_at 1.01417 "DNA segment, Chr 12, ERATO Doi 247, expressed" D12Ertd247e  
1442939\_at 1.03313 Rap1 interacting factor 1 homolog (yeast) /// similar to Telomere-associated protein RIF1 (Rap1-interacting factor 1 homolog) (mRif1) Rif1 /// LOC671598  
1442940\_at 1.02001 "Adult male corpora quadrigemina cDNA, RIKEN full-length enriched library, clone:B230110I22 product:unclassifiable, full insert sequence" ---  
1442941\_at 1.00019 expressed sequence C77027 C77027  
1442942\_at 0.93863 Williams-Beuren syndrome chromosome region 1 homolog (human) Wbscr1  
1442943\_at 0.95215 Ubiquitin specific peptidase 20 Usp20  
1442944\_at 1.29089 expressed sequence C76555 C76555  
1442945\_at 1.33728 RIKEN cDNA 2010109K09 gene 2010109K09Rik  
1442946\_at 1.30019 Ataxin 7 Atxn7  
1442947\_x\_at 0.95130 "13 days embryo heart cDNA, RIKEN full-length enriched library, clone: D330042P15 product:unclassifiable, full insert sequence" ---  
1442948\_at 1.04776 --- ---  
1442949\_at 1.28560 "Nuclear factor of kappa light chain gene enhancer in B-cells 1, p105" Nfkb1  
1442950\_at 0.95427 Neuregulin 3 Nrg3  
1442951\_at 1.43783 Developmentally regulated repeat element-containing transcript 1 Drr1  
1442952\_at 1.02895 Shroom Shrm  
1442953\_at 0.97024 Transcribed locus ---  
1442954\_at 0.92431 Transcribed locus ---  
1442955\_at 1.04726 --- ---  
1442956\_at 1.05155 "Protein phosphatase 1, regulatory (inhibitor) subunit 13B" Ppp1r13b  
1442957\_at 0.95521 RIKEN cDNA G730013B05 gene G730013B05Rik  
1442958\_at 1.02722 "Lung RCB-0558 LLC cDNA, RIKEN full-length enriched library, clone: G730002L02 product:unclassifiable, full insert sequence" ---  
1442959\_at 2.23475 baculoviral IAP repeat-containing 6 Birc6  
1442960\_at 1.03026 mucin 20 Muc20  
1442961\_at 0.95425 --- ---  
1442962\_at 1.03113 expressed sequence AU022052 AU022052  
1442963\_at 1.08877 zinc fingers and homeoboxes 3 Zhx3  
1442964\_at 1.26753 Expressed sequence AU020772 AU020772  
1442965\_at 1.03332 --- ---  
1442966\_at 0.96172 RIKEN cDNA 5330421F07 gene 5330421F07Rik  
1442967\_at 1.11615 expressed sequence AU020147 AU020147

|              |         |                                                                                                                                   |               |
|--------------|---------|-----------------------------------------------------------------------------------------------------------------------------------|---------------|
| 1442968_at   | 0.99270 | "DNA segment, Chr 9, ERATO Doi 241, expressed"                                                                                    | D9Ertd241e    |
| 1442969_at   | 0.96428 | ---                                                                                                                               | ---           |
| 1442970_at   | 0.99476 | ---                                                                                                                               | ---           |
| 1442971_at   | 1.84839 | "bromodomain adjacent to zinc finger domain, 2B"                                                                                  | Baz2b         |
| 1442972_at   | 1.65861 | "Coronin, actin binding protein 1C"                                                                                               | Coro1c        |
| 1442973_at   | 0.92386 | expressed sequence C80865                                                                                                         | C80865        |
| 1442974_at   | 1.00498 | "DNA segment, Chr 6, ERATO Doi 160, expressed"                                                                                    | D6Ertd160e    |
| 1442975_at   | 0.90858 | Transcribed locus                                                                                                                 | ---           |
| 1442976_at   | 0.86846 | expressed sequence C81072                                                                                                         | C81072        |
| 1442977_at   | 1.03034 | "Procollagen, type III, alpha 1"                                                                                                  | Col3a1        |
| 1442978_at   | 0.91884 | Multiple PDZ domain protein                                                                                                       | Mpdz          |
| 1442979_at   | 0.80599 | "PREDICTED: Mus musculus similar to zinc finger protein 709 (LOC629191), mRNA"                                                    | ---           |
| 1442980_at   | 1.00240 | Serine/arginine-rich protein specific kinase 2                                                                                    | Srpk2         |
| 1442981_at   | 0.99812 | ---                                                                                                                               | ---           |
| 1442982_at   | 0.97898 | coiled-coil domain containing 66                                                                                                  | Ccdc66        |
| 1442983_at   | 1.36652 | "Solute carrier family 23 (nucleobase transporters), member 2"                                                                    | Slc23a2       |
| 1442984_at   | 0.96026 | expressed sequence C80060                                                                                                         | C80060        |
| 1442985_at   | 1.04151 | Hemicentin 1                                                                                                                      | Hmcn1         |
| 1442986_at   | 1.00177 | "ELK3, member of ETS oncogene family"                                                                                             | Elk3          |
| 1442987_at   | 0.96862 | ---                                                                                                                               | ---           |
| 1442988_at   | 1.04325 | RIKEN cDNA A630001O12 gene                                                                                                        | A630001O12Rik |
| 1442989_at   | 1.10900 | Asparaginyl-tRNA synthetase 2 (mitochondrial)(putative)                                                                           | Nars2         |
| 1442990_at   | 1.00084 | ---                                                                                                                               | ---           |
| 1442991_at   | 1.00901 | "beta-1,3-glucuronyltransferase 2 (glucuronosyltransferase S)"                                                                    | B3gat2        |
| 1442992_at   | 2.80315 | hypothetical LOC403343                                                                                                            | 130004C03     |
| 1442993_at   | 1.11152 | integrin beta 3 binding protein (beta3-endonexin)                                                                                 | Itgb3bp       |
| 1442994_at   | 0.96266 | "Superoxide dismutase 2, mitochondrial"                                                                                           | Sod2          |
| 1442995_at   | 1.28338 | N-deacetylase/N-sulfotransferase (heparan glucosaminyl) 1                                                                         | Ndst1         |
| 1442996_x_at | 1.09438 | "0 day neonate kidney cDNA, RIKEN full-length enriched library, clone: D630027M10 product:unclassifiable, full insert sequence"   | ---           |
| 1442997_at   | 1.37006 | Odd Oz/ten-m homolog 3 (Drosophila)                                                                                               | Odz3          |
| 1442998_at   | 0.95373 | Cytidine 5'-triphosphate synthase 2                                                                                               | Ctps2         |
| 1442999_at   | 0.88102 | RIKEN cDNA B930036G03 gene                                                                                                        | B930036G03Rik |
| 1443000_at   | 1.09569 | "DNA segment, Chr 3, ERATO Doi 300, expressed"                                                                                    | D3Ertd300e    |
| 1443001_at   | 1.00585 | expressed sequence C78344                                                                                                         | C78344        |
| 1443002_at   | 1.69729 | zinc finger RNA binding protein Zfr                                                                                               |               |
| 1443003_at   | 1.26660 | ---                                                                                                                               | ---           |
| 1443004_at   | 1.01643 | "Adult male liver tumor cDNA, RIKEN full-length enriched library, clone: C730045N16 product:unclassifiable, full insert sequence" | ---           |
| 1443005_at   | 1.07094 | zinc finger homeobox 1a                                                                                                           | Zfhx1a        |
| 1443006_at   | 1.00169 | Synapsin III                                                                                                                      | Syn3          |
| 1443007_at   | 1.05772 | ---                                                                                                                               | ---           |



1443008\_at 1.00217 Musashi homolog 2 (Drosophila) Msi2  
1443009\_at 1.02785 Transcribed locus ---  
1443010\_at 1.05099 F-box and WD-40 domain protein 11 Fbxw11  
1443011\_at 0.91714 protein arginine N-methyltransferase 7 Prmt7  
1443012\_at 1.01496 Transcription factor 12 Tcf12  
1443013\_at 1.04538 "A disintegrin-like and metalloproteinase (reprolysin type) with thrombospondin type 1 motif, 16" Adamts16  
1443014\_at 1.01279 RIKEN cDNA 4833403I15 gene 4833403I15Rik  
1443015\_at 0.88692 "Ras homolog gene family, member H" Rhoh  
1443016\_at 1.00830 DNA methyltransferase 3B Dnmt3b  
1443017\_at 0.95378 cytoplasmic polyadenylation element binding protein 2 Cpeb2  
1443018\_at 1.28519 Neural cell adhesion molecule 1 Ncam1  
1443019\_at 0.84676 --- ---  
1443020\_at 1.71927 Homeobox containing 1 Hmbox1  
1443021\_at 0.93138 "5, 10-methenyltetrahydrofolate synthetase" Mthfs  
1443022\_at 0.89750 RIKEN cDNA 4930521E07 gene 4930521E07Rik  
1443023\_at 1.06746 Transcribed locus ---  
1443024\_at 1.08711 "PREDICTED: Mus musculus hypothetical protein LOC623199 (LOC623199), mRNA" ---  
1443025\_at 1.07779 "10 days neonate medulla oblongata cDNA, RIKEN full-length enriched library, clone:B830002A04 product:unclassifiable, full insert sequence" ---  
1443026\_at 1.07190 Glutamate receptor interacting protein 1 Grip1  
1443027\_at 0.98854 RIKEN cDNA 4930523C07 gene 4930523C07Rik  
1443028\_at 0.98386 "La ribonucleoprotein domain family, member 6" Larp6  
1443029\_at 1.42457 "PTPRF interacting protein, binding protein 1 (liprin beta 1)" Ppfibp1  
1443030\_at 0.97553 l(3)mbt-like 3 (Drosophila) L3mbtl3  
1443031\_at 1.21335 "15 days embryo head cDNA, RIKEN full-length enriched library, clone: D930037E02 product:unclassifiable, full insert sequence" ---  
1443032\_at 1.05899 Mitochondrial ribosomal protein S22 Mrps22  
1443033\_at 1.00616 RNA binding motif protein 14 Rbm14  
1443034\_at 0.84383 Hermansky-Pudlak syndrome 1 homolog (human) Hps1  
1443035\_at 1.08310 --- ---  
1443036\_at 1.08337 RIKEN cDNA C630007C17 gene C630007C17Rik  
1443037\_at 2.19341 Neuroplastin Nptn  
1443038\_at 0.98134 --- ---  
1443039\_at 0.92074 --- ---  
1443040\_x\_at 0.92728 --- ---  
1443041\_at 0.89212 zinc finger and BTB domain containing 17 Zbtb17  
1443042\_at 1.13755 Roundabout homolog 1 (Drosophila) Robo1  
1443043\_at 1.10712 otopetrin 2 Otop2  
1443044\_at 1.13944 hypothetical A830091E24 A830091E24  
1443045\_at 1.19197 Integrator complex subunit 7 Ints7  
1443046\_at 0.99595 "ATP-binding cassette, sub-family D (ALD), member 3" Abcd3

1443047\_at 1.05676 PDZ domain containing RING finger 3 Pdzn3  
1443048\_at 1.10776 --- ---  
1443049\_at 1.21817 Transmembrane protein 19 Tmem19  
1443050\_at 0.96327 CDNA sequence BC032265 BC032265  
1443051\_at 0.92510 "10 days neonate cerebellum cDNA, RIKEN full-length enriched library, clone:  
B930095F19 product:unclassifiable, full insert sequence" ---  
1443052\_at 0.93007 RIKEN cDNA C330019L16 gene C330019L16Rik  
1443053\_at 0.95787 "Protein tyrosine phosphatase, receptor type, D" Ptprd  
1443054\_at 1.02759 "potassium inwardly-rectifying channel, subfamily J, member 15" Kcnj15  
1443055\_at 0.89086 RIKEN cDNA B230369F24 gene B230369F24Rik  
1443056\_at 1.03000 "Protein tyrosine phosphatase, receptor type, D" Ptprd  
1443057\_at 0.92468 --- ---  
1443058\_at 0.86389 RIKEN cDNA 2900006F19 gene 2900006F19Rik  
1443059\_at 0.94889 dehydrogenase/reductase (SDR family) member 8 Dhrr8  
1443060\_at 1.02882 RIKEN cDNA 2810003K23 gene 2810003K23Rik  
1443061\_at 0.99776 Transcribed locus ---  
1443062\_at 1.00678 autism susceptibility candidate 2 Aut2  
1443063\_at 0.96670 RIKEN cDNA A330019N05 gene A330019N05Rik  
1443064\_at 1.02130 RIKEN cDNA 9130004C02 gene 9130004C02Rik  
1443065\_at 1.17818 Rhomboid domain containing 1 Rhbdd1  
1443066\_at 0.89291 --- ---  
1443067\_at 1.01596 Transcribed locus ---  
1443068\_at 1.58084 RIKEN cDNA D130084N16 gene D130084N16Rik  
1443069\_at 1.23848 "Protein kinase C, alpha" Prkca  
1443070\_at 1.02895 Autism susceptibility candidate 2 Aut2  
1443071\_at 0.98584 Expressed sequence AI839979 AI839979  
1443072\_at 1.15422 --- ---  
1443073\_at 1.06932 hypothetical protein LOC545681 LOC545681  
1443074\_at 1.34946 --- ---  
1443075\_at 0.89665 "Protein tyrosine phosphatase, receptor type, D" Ptprd  
1443076\_at 1.07037 RIKEN cDNA D030041N04 gene D030041N04Rik  
1443077\_at 1.24429 RIKEN cDNA 1700081L11 gene 1700081L11Rik  
1443078\_at 1.04930 RIKEN cDNA 6030439D06 gene 6030439D06Rik  
1443079\_at 0.92581 Transcribed locus ---  
1443080\_at 0.81425 Adenylate cyclase 5 Adcy5  
1443081\_at 0.96865 GATA binding protein 6 Gata6  
1443082\_at 1.00430 --- ---  
1443083\_at 1.01979 Cleavage and polyadenylation specific factor 2 Cpsf2  
1443084\_at 0.92848 cathepsin O Ctso  
1443085\_at 0.94106 "Splicing factor, arginine/serine-rich 2, interacting protein" Sfrs2ip  
1443086\_at 0.91772 activated leukocyte cell adhesion molecule Alcam  
1443087\_at 0.97662 "CDC23 (cell division cycle 23, yeast, homolog)" Cdc23  
1443088\_at 3.87249 RIKEN cDNA 9930031P18 gene 9930031P18Rik

1443089\_at 0.90082 RIKEN cDNA 4930506C02 gene 4930506C02Rik  
1443090\_at 1.12733 Choline/ethanolaminephosphotransferase 1 Cept1  
1443091\_at 1.01006 --- ---  
1443092\_at 1.29667 myotubularin related protein 3 Mtmr3  
1443093\_at 1.03190 Adherens junction associated protein 1 Ajap1  
1443094\_at 0.96193 expressed sequence BB031773 BB031773  
1443095\_at 1.10661 --- ---  
1443096\_at 0.98394 RIKEN cDNA 4921526F01 gene 4921526F01Rik  
1443097\_at 1.24605 Neurofibromatosis 1 Nf1  
1443098\_at 0.93907 "Adult male corpora quadrigemina cDNA, RIKEN full-length enriched library, clone:B230340D10 product:unclassifiable, full insert sequence" ---  
1443099\_at 0.70093 CDNA sequence BC087945 BC087945  
1443100\_at 0.98465 Thyroid hormone receptor beta Thrb  
1443101\_at 0.92237 "Glutamate receptor, ionotropic, delta 2" Grid2  
1443102\_at 0.98588 zinc finger protein 597 Zfp597  
1443103\_at 1.05228 RIKEN cDNA D830046C22 gene D830046C22Rik  
1443104\_at 0.89964 --- ---  
1443105\_at 1.02513 Zinc finger protein 398 Zfp398  
1443106\_at 0.92959 RIKEN cDNA 4930562C15 gene 4930562C15Rik  
1443107\_at 1.90466 Transmembrane protein 16F Tmem16f  
1443108\_at 0.98592 "15 days embryo head cDNA, RIKEN full-length enriched library, clone: D930002E06 product:hypothetical protein, full insert sequence" ---  
1443109\_at 1.20624 RIKEN cDNA 5830417C01 gene 5830417C01Rik  
1443110\_at 0.86617 "general transcription factor II E, polypeptide 1 (alpha subunit)" Gtf2e1  
1443111\_at 0.97001 "pleckstrin homology domain containing, family A (phosphoinositide binding specific) member 1" Plekha1  
1443112\_at 0.98801 apoptosis inhibitor 5 Api5  
1443113\_at 0.92858 Jumonji domain containing 2B Jmjd2b  
1443114\_at 1.38240 RIKEN cDNA A730059M13 gene A730059M13Rik  
1443115\_at 0.89137 "Transforming growth factor, beta receptor II" Tgfbr2  
1443116\_at 1.35486 --- ---  
1443117\_at 1.32551 eyes absent 1 homolog (Drosophila) Eya1  
1443118\_at 0.91254 --- ---  
1443119\_at 1.07381 "glutamate receptor, metabotropic 7" Grm7  
1443120\_at 0.96613 PDZ domain containing 4 Pdzd4  
1443121\_at 0.97062 --- ---  
1443122\_at 1.02147 "15 days embryo head cDNA, RIKEN full-length enriched library, clone: D930037A07 product:unclassifiable, full insert sequence" ---  
1443123\_at 1.08030 "Tetratricopeptide repeat, ankyrin repeat and coiled-coil containing 2" Tanc2  
1443124\_at 1.15176 --- ---  
1443125\_at 1.21955 thyroid hormone receptor interactor 12 Trip12  
1443126\_at 1.01881 "Solute carrier family 12, member 1" Slc12a1  
1443127\_at 1.01066 RIKEN cDNA 9630021D06 gene 9630021D06Rik

1443128\_at 1.55467 integrator complex subunit 6 Ints6  
1443129\_at 0.92052 --- ---  
1443130\_at 1.00343 hypothetical protein LOC628951 LOC628951  
1443131\_at 1.01062 "RAN, member RAS oncogene family" Ran  
1443132\_at 1.07672 hypothetical protein LOC544809 LOC544809  
1443133\_at 0.89153 RIKEN cDNA A230070E04 gene A230070E04Rik  
1443134\_at 0.95643 RIKEN cDNA A930005G22 gene A930005G22Rik  
1443135\_at 1.21235 component of oligomeric golgi complex 4 Cog4  
1443136\_at 0.96577 hypothetical gene supported by AK082906 LOC432459  
1443137\_at 0.97733 "0 day neonate lung cDNA, RIKEN full-length enriched library, clone:  
E030034L15 product:unclassifiable, full insert sequence" ---  
1443138\_at 1.07063 "Sulfotransferase family 5A, member 1" Sult5a1  
1443139\_at 1.10373 --- ---  
1443140\_at 1.05789 hypothetical protein LOC627777 LOC627777  
1443141\_at 1.13836 --- ---  
1443142\_at 1.28688 Beta-transducin repeat containing protein Btrc  
1443143\_at 0.93233 fibronectin leucine rich transmembrane protein 3 Flrt1  
1443144\_at 1.21474 "protein kinase C, beta 1" Prkcb1  
1443145\_at 1.01060 "amyloid beta (A4) precursor protein-binding, family B, member 1 interacting  
protein" Apbb1ip  
1443146\_at 1.97070 "ATPase family, AAA domain containing 2" Atad2  
1443147\_at 0.93915 Acyl-CoA thioesterase 3 Acot3  
1443148\_at 1.14245 huntingtin interacting protein 2 Hip2  
1443149\_at 1.16046 Nicotinamide nucleotide adenylyltransferase 3 Nmnat3  
1443150\_at 1.07962 Dynamin 2 Dnm2  
1443151\_at 1.05795 Synaptojanin 2 binding protein Synj2bp  
1443152\_at 1.11242 Pentatricopeptide repeat domain 3 Ptdc3  
1443153\_at 1.10442 Thyroid hormone receptor interactor 11 Trip11  
1443154\_at 1.00549 hypothetical protein 6030438J01 6030438J01  
1443155\_at 0.95586 --- ---  
1443156\_at 1.50906 --- ---  
1443157\_at 2.99367 GLIS family zinc finger 3 Glis3  
1443158\_at 1.21815 Sex comb on midleg homolog 1 Scmh1  
1443159\_at 2.00389 RIKEN cDNA 9130221J17 gene 9130221J17Rik  
1443160\_at 1.51706 SET binding factor 2 Sbf2  
1443161\_at 2.51331 Trichorhinophalangeal syndrome I (human) Trps1  
1443162\_at 1.17733 "Protein tyrosine phosphatase, non-receptor type 3" Ptpn3  
1443163\_at 1.06304 "solute carrier family 39 (zinc transporter), member 2" Slc39a2  
1443164\_at 1.01179 Vacuolar protein sorting 13D (yeast) Vps13d  
1443165\_at 1.02752 mitochondrial ribosomal protein S31 Mrps31  
1443166\_at 1.60311 CDNA sequence BC021395 BC021395  
1443167\_at 2.38766 Ring finger protein 12 Rnf12  
1443168\_at 0.98266 "Adult male colon cDNA, RIKEN full-length enriched library,

clone:9030003C19 product:unclassifiable, full insert sequence" ---

1443169\_at 1.35779 "CCR4-NOT transcription complex, subunit 4" Cnot4

1443170\_at 0.94710 --- ---

1443171\_at 0.82938 --- ---

1443172\_at 1.24368 "origin recognition complex, subunit 1-like (S.cereviaiae)" Orc11

1443173\_at 0.97033 pleiotrophin Ptn

1443174\_at 1.02631 Transmembrane and tetratricopeptide repeat containing 2 Tmtc2

1443175\_at 0.91588 RIKEN cDNA A830010M09 gene A830010M09Rik

1443176\_at 0.86838 Scm-like with four mbt domains 2 Sfmbt2

1443177\_at 0.92281 Transcribed locus ---

1443178\_at 0.90562 ring finger protein 13 Rnf13

1443179\_at 0.94331 CUB and Sushi multiple domains 1 Csm1

1443180\_at 1.40850 ERGIC and golgi 2 Ergic2

1443181\_at 0.98426 "12 days embryo spinal ganglion cDNA, RIKEN full-length enriched library, clone:D130046G19 product:inferred: RNP particle component {Mus musculus}, full insert sequence" ---

1443182\_at 1.09523 Expressed sequence AW060207 AW060207

1443183\_at 1.12012 "HECT, UBA and WWE domain containing 1" Huwe1

1443184\_at 0.96584 CDC14 cell division cycle 14 homolog A (S. cerevisiae) Cdc14a

1443185\_at 1.06730 lipoma HMGIC fusion partner-like 2 Lhfp12

1443186\_at 1.10004 RIKEN cDNA 4930425N13 gene 4930425N13Rik

1443187\_at 0.87893 --- ---

1443188\_at 1.78021 ubiquitin-conjugating enzyme E2W (putative) Ube2w

1443189\_at 0.99788 --- ---

1443190\_at 0.91554 "15 days embryo head cDNA, RIKEN full-length enriched library, clone: D930036L24 product:unclassifiable, full insert sequence" ---

1443191\_at 0.89587 --- ---

1443192\_at 0.88614 --- ---

1443193\_at 0.94799 tubulin tyrosine ligase-like 1 Ttll1

1443194\_at 0.97152 --- ---

1443195\_at 0.96262 --- ---

1443196\_at 0.79976 --- ---

1443197\_at 1.01745 wingless-type MMTV integration site 9B Wnt9b

1443198\_at 0.91725 "1 cell embryo 1 cell cDNA, RIKEN full-length enriched library, clone: IOC0049K08 product:unclassifiable, full insert sequence" ---

1443199\_at 1.12376 Leucine-rich repeats and calponin homology (CH) domain containing 3 Lrch3

1443200\_at 0.97375 hypothetical protein A930011G24 A930011G24

1443201\_at 1.18674 Glypican 6 Gpc6

1443202\_at 1.40482 Cytochrome b5 type B Cyb5b

1443203\_at 1.00981 Zinc finger homeobox 1a Zfhx1a

1443204\_at 0.94337 "RNA binding motif, single stranded interacting protein" Rbms3

1443205\_at 0.99861 "DNA segment, Chr 5, Bucan 30 expressed" D5Buc30e

1443206\_at 1.14420 "ATP-binding cassette, sub-family C (CFTR/MRP), member 3" Abcc3

1443207\_at 1.10036 "Adult male diencephalon cDNA, RIKEN full-length enriched library,

clone:9330196A19 product:unclassifiable, full insert sequence" ---  
1443208\_at 1.57625 G protein-coupled receptor 137B Gpr137b  
1443209\_at 1.05549 "Histone 1, H1e" Hist1h1e  
1443210\_at 1.05427 --- ---  
1443211\_at 0.89690 --- ---  
1443212\_at 1.90877 Like-glycosyltransferase Large  
1443213\_at 1.07767 glycosyltransferase-like domain containing 1 Gtdc1  
1443214\_at 0.98426 G protein-coupled receptor 155 Gpr155  
1443215\_at 1.06141 regulating synaptic membrane exocytosis 2 Rims2  
1443216\_at 1.20406 "TBC1 domain family, member 5" Tbc1d5  
1443217\_at 0.94386 "Adult male epididymis cDNA, RIKEN full-length enriched library,  
clone:9230118O19 product:unclassifiable, full insert sequence" ---  
1443218\_at 0.99007 Phosphatidylinositol binding clathrin assembly protein Picalm  
1443219\_at 1.03684 --- ---  
1443220\_at 1.20759 Reticulon 3 Rtn3  
1443221\_at 1.01191 Wilms tumor homolog Wt1  
1443222\_at 1.03054 Thymoma viral proto-oncogene 3 Akt3  
1443223\_at 0.84067 --- ---  
1443224\_at 0.97465 ectonucleotide pyrophosphatase/phosphodiesterase 2 Enpp2  
1443225\_at 1.04796 "activin A receptor, type IC" Acvr1c  
1443226\_at 1.25416 RIKEN cDNA 5730470L24 gene 5730470L24Rik  
1443227\_at 1.05789 basic leucine zipper and W2 domains 2 Bzw2  
1443228\_at 1.10942 --- ---  
1443229\_at 1.22810 "ATPase family, AAA domain containing 2" Atad2  
1443230\_at 1.27106 RIKEN cDNA 5330421F07 gene 5330421F07Rik  
1443231\_at 2.96807 "Membrane associated guanylate kinase, WW and PDZ domain containing 1"  
Magi1  
1443232\_at 0.94823 Transcribed locus ---  
1443233\_at 1.53229 "General transcription factor IIF, polypeptide 2" Gtf2f2  
1443234\_at 1.03044 CDNA sequence BC088983 BC088983  
1443235\_at 1.18797 Eukaryotic translation initiation factor 2 alpha kinase 4 Eif2ak4  
1443236\_at 1.15721 RIKEN cDNA B230118H07 gene B230118H07Rik  
1443237\_at 1.04497 --- ---  
1443238\_at 1.07132 PHD finger protein 14 Phf14  
1443239\_at 1.07357 Microtubule-associated protein 2 Mtap2  
1443240\_at 0.96908 Glypican 3 Gpc3  
1443241\_at 1.12121 Pseudouridylate synthase 7 homolog (S. cerevisiae) Pus7  
1443242\_at 1.28133 "DNA segment, Chr 5, ERATO Doi 121, expressed" D5Ert121e  
1443243\_at 0.98156 --- ---  
1443244\_at 0.98567 "zinc binding alcohol dehydrogenase, domain containing 1" Zadh1  
1443245\_at 1.01673 --- ---  
1443246\_at 1.03652 FAST kinase domains 2 Fastkd2  
1443247\_at 1.11956 Glucose-fructose oxidoreductase domain containing 1 Gfod1

1443248\_at 1.14265 transmembrane and coiled-coil domains 3 Tmco3  
1443249\_at 0.97056 Membrane-associated ring finger (C3HC4) 3 3-Mar  
1443250\_at 1.12198 --- ---  
1443251\_at 0.89180 PR domain containing 16 Prdm16  
1443252\_at 0.92793 IBR domain containing 2 Ibrdc2  
1443253\_at 2.68078 GLIS family zinc finger 3 Glis3  
1443254\_at 1.07378 RIKEN cDNA D030011O10 gene D030011O10Rik  
1443255\_s\_at 1.00085 Cdc42 GTPase-activating protein Cdgap  
1443256\_at 0.92390 Chloride channel calcium activated 6 Clca6  
1443257\_at 1.16889 RIKEN cDNA 9630050E16 gene 9630050E16Rik  
1443258\_at 1.45312 forkhead box P1 Foxp1  
1443259\_at 1.16690 Transcribed locus ---  
1443260\_at 1.04565 myeloid ecotropic viral integration site 1 Meis1  
1443261\_at 0.92657 RIKEN cDNA E130307A14 gene E130307A14Rik  
1443262\_at 1.02813 mitochondrial ribosomal protein S14 Mrps14  
1443263\_at 1.03210 BTB and CNC homology 2 Bach2  
1443264\_at 0.89920 "membrane-spanning 4-domains, subfamily A, member 2" Ms4a2  
1443265\_at 0.98831 CD44 antigen Cd44  
1443266\_at 1.25141 Niemann Pick type C2 Npc2  
1443267\_at 1.04722 "Tetratricopeptide repeat, ankyrin repeat and coiled-coil containing 2" Tanc2  
1443268\_at 0.94389 Transcribed locus ---  
1443269\_at 0.95302 RIKEN cDNA D130009B15 gene D130009B15Rik  
1443270\_at 1.12617 "Adult male hypothalamus cDNA, RIKEN full-length enriched library, clone:  
A230020K01 product:unclassifiable, full insert sequence" ---  
1443271\_at 0.94710 Transmembrane protein 28 Tmem28  
1443272\_at 0.91784 neighbor of Punc E11 Nope  
1443273\_at 0.90574 Eph receptor A3 Epha3  
1443274\_at 0.97261 RIKEN cDNA 4932435O22 gene 4932435O22Rik  
1443275\_at 1.13942 Cdc42 GTPase-activating protein Cdgap  
1443276\_at 0.99031 5-hydroxytryptamine (serotonin) receptor 5A Htr5a  
1443277\_at 1.03679 N-deacetylase/N-sulfotransferase (heparan glucosaminyl) 3 Ndst3  
1443278\_at 1.03769 Deleted in colorectal carcinoma Dcc  
1443279\_at 1.14754 Nemo like kinase Nlk  
1443280\_at 0.99088 --- ---  
1443281\_at 0.98518 RIKEN cDNA C130076O07 gene C130076O07Rik  
1443282\_at 1.00559 PRP38 pre-mRNA processing factor 38 (yeast) domain containing A Prpf38a  
1443283\_at 1.10041 RIKEN cDNA C330002D13 gene C330002D13Rik  
1443284\_at 0.85644 Special AT-rich sequence binding protein 1 Satb1  
1443285\_at 1.09037 "Glutamate receptor, ionotropic, AMPA4 (alpha 4)" Gria4  
1443286\_at 1.05292 expressed sequence AU019754 AU019754  
1443287\_at 0.94485 "gene model 1337, (NCBI)" Gm1337  
1443288\_at 1.01240 Tnf receptor-associated factor 6 Traf6  
1443289\_at 1.02254 "Phosphodiesterase 4D, cAMP specific" Pde4d

1443290\_at 0.92641 "Adult male medulla oblongata cDNA, RIKEN full-length enriched library, clone:6330436D20 product:unclassifiable, full insert sequence" ---

1443291\_at 1.01433 "Ankyrin 1, erythroid" Ank1

1443292\_at 0.99124 Transcribed locus ---

1443293\_at 1.68391 --- ---

1443294\_at 1.20493 "Cdc2-related kinase, arginine/serine-rich" Crkrs

1443295\_at 0.94530 Transcribed locus ---

1443296\_at 1.06433 PCTAIRE-motif protein kinase 1 Pctk1

1443297\_at 1.23992 "TBC1D12: TBC1 domain family, member 12" Tbc1d12

1443298\_at 1.04047 F-box and WD-40 domain protein 13 Fbxw13

1443299\_at 1.01367 PDZ and LIM domain 3 Pdlim3

1443300\_at 0.89688 Notch gene homolog 3 (Drosophila) Notch3

1443301\_at 1.09366 RIKEN cDNA C230086A09 gene C230086A09Rik

1443302\_at 1.16422 RIKEN cDNA 6720403M19 gene 6720403M19Rik

1443303\_at 1.16957 RIKEN cDNA 4930521E07 gene 4930521E07Rik

1443304\_at 1.03837 "metallothionein-like 5, testis-specific (tesmin)" Mtl5

1443305\_at 1.01436 "13 days embryo heart cDNA, RIKEN full-length enriched library, clone: D330014J04 product:unclassifiable, full insert sequence" ---

1443306\_at 1.08909 "0 day neonate cerebellum cDNA, RIKEN full-length enriched library, clone: C230004E12 product:hypothetical protein, full insert sequence" ---

1443307\_at 1.41492 "Proteasome (prosome, macropain) 26S subunit, ATPase 2" Psmc2

1443308\_at 0.99693 unc-13 homolog B (C. elegans) Unc13b

1443309\_at 1.20330 PDZ domain containing RING finger 3 Pdzn3

1443310\_at 0.92841 nucleoporin 210 Nup210

1443311\_at 0.78745 THAP domain containing 4 Thap4

1443312\_at 0.99664 "Regulatory factor X, 4 (influences HLA class II expression)" Rfx4

1443313\_at 0.93309 RIKEN cDNA A530058N18 gene A530058N18Rik

1443314\_at 2.15156 RIKEN cDNA 2410042D21 gene 2410042D21Rik

1443315\_at 0.88943 --- ---

1443316\_at 0.99892 Transcribed locus ---

1443317\_at 1.09760 "DNA segment, Chr 6, ERATO Doi 47, expressed" D6Ertd47e

1443318\_at 1.11158 RIKEN cDNA E130016E03 gene E130016E03Rik

1443319\_at 0.95915 phosphoprotein associated with glycosphingolipid microdomains 1 Pag1

1443320\_at 0.88363 CLIP associating protein 2 Clasp2

1443321\_at 1.03857 Transmembrane and tetratricopeptide repeat containing 2 Tmtc2

1443322\_at 0.99471 Transcribed locus ---

1443323\_at 1.01738 RIKEN cDNA A930028L21 gene A930028L21Rik

1443324\_at 1.02641 "Transcribed locus, moderately similar to XP\_515274.1 PREDICTED: similar to FLJ00254 protein [Pan troglodytes]" ---

1443325\_at 1.35804 Transcribed locus ---

1443326\_at 1.06163 --- ---

1443327\_at 1.14526 RIKEN cDNA D130043K22 gene D130043K22Rik

1443328\_at 0.98908 RIKEN cDNA 4921505C17 gene 4921505C17Rik



1443329\_at 1.09781 membrane-associated ring finger (C3HC4) 7 7-Mar  
1443330\_at 1.01123 "DNA segment, Chr 1, ERATO Doi 646, expressed" D1Ert646e  
1443331\_at 0.95862 "Pleckstrin homology domain containing, family G (with RhoGef domain)  
member 1" Plekhg1  
1443332\_at 1.22795 "Solute carrier family 12, member 2" Slc12a2  
1443333\_at 1.02226 "Adult male spinal cord cDNA, RIKEN full-length enriched library, clone:  
A330092A19 product:unclassifiable, full insert sequence" ---  
1443334\_at 1.08907 RIKEN cDNA D430042O09 gene D430042O09Rik  
1443335\_at 1.30210 PDZ domain containing RING finger 3 Pdzn3  
1443336\_at 1.01020 F-box and leucine-rich repeat protein 11 Fbxl11  
1443337\_at 3.08022 Glutamate receptor interacting protein 1 Grip1  
1443338\_at 1.60460 "Adaptor protein complex AP-2, mu1" Ap2m1  
1443339\_at 1.33318 RIKEN cDNA 2310056P07 gene 2310056P07Rik  
1443340\_at 1.09789 calcium binding atopy-related autoantigen 1 Cbara1  
1443341\_at 2.22127 Annexin A4 Anxa4  
1443342\_at 1.04768 Transcribed locus ---  
1443343\_at 1.00893 --- ---  
1443344\_at 0.98244 RIKEN cDNA 4932409I22 gene 4932409I22Rik  
1443345\_at 0.95275 RIKEN cDNA 1700047E16 gene 1700047E16Rik  
1443346\_at 1.06688 --- ---  
1443347\_at 1.08688 --- ---  
1443348\_at 1.07263 RIKEN cDNA D030028M11 gene D030028M11Rik  
1443349\_at 0.97575 Deducator of cytokinesis 10 Dock10  
1443350\_at 0.93291 metastasis associated 3 Mta3  
1443351\_at 0.93058 "Glycine receptor, alpha 2 subunit" Glra2  
1443352\_at 1.09517 EST C77614 C77614  
1443353\_at 1.26545 Zinc finger RNA binding protein Zfr  
1443354\_at 1.41318 Tripartite motif-containing 59 Trim59  
1443355\_at 1.84830 --- ---  
1443356\_at 0.94724 "Cyclic AMP-regulated phosphoprotein, 21" Arpp21  
1443357\_at 0.96007 Zinc finger RNA binding protein Zfr  
1443358\_at 0.86641 Ribonuclease P 14 subunit (human) Rpp14  
1443359\_at 0.97862 Odd Oz/ten-m homolog 4 (Drosophila) Odz4  
1443360\_x\_at 0.91996 Rho GTPase activating protein 4 Arhgap4  
1443361\_at 1.80912 Tetraspanin 9 Tspan9  
1443362\_at 1.27184 zinc finger protein 277 Zfp277  
1443363\_at 0.89442 RIKEN cDNA A430107O13 gene A430107O13Rik  
1443364\_at 1.05008 Transcribed locus ---  
1443365\_at 1.06848 5 hydroxytryptamine (serotonin) receptor 4 Htr4  
1443366\_at 1.23387 N-ethylmaleimide sensitive fusion protein attachment protein gamma Napg  
1443367\_at 0.94834 --- ---  
1443368\_at 0.99493 "2 cells egg cDNA, RIKEN full-length enriched library, clone:B020017L01  
product:unclassifiable, full insert sequence" ---

1443369\_at 1.07202 cDNA sequence BC052055 BC052055  
1443370\_at 1.02389 Activating signal cointegrator 1 complex subunit 3 Ascc3  
1443371\_at 0.95881 RIKEN cDNA 4930473A06 gene 4930473A06Rik  
1443372\_at 0.97177 "12 days embryo spinal cord cDNA, RIKEN full-length enriched library, clone: C530005L06 product:unclassifiable, full insert sequence" ---  
1443373\_at 1.03390 Mitogen-activated protein kinase kinase kinase kinase 5 Map4k5  
1443374\_at 0.89362 Transcribed locus ---  
1443375\_at 0.99189 "GNAS (guanine nucleotide binding protein, alpha stimulating) complex locus" Gnas  
1443376\_at 0.83008 Transcribed locus ---  
1443377\_at 0.95834 MAP kinase-activated protein kinase 5 /// a disintegrin and metallopeptidase domain 1a Mapkapk5 /// Adam1a  
1443378\_s\_at 1.03544 MAP kinase-activated protein kinase 5 /// a disintegrin and metallopeptidase domain 1a Mapkapk5 /// Adam1a  
1443379\_at 0.84292 RIKEN cDNA A430033K04 gene A430033K04Rik  
1443380\_at 0.95451 "alcohol dehydrogenase 5 (class III), chi polypeptide" Adh5  
1443381\_at 1.31673 "ets variant gene 4 (E1A enhancer binding protein, E1AF)" Etv4  
1443382\_s\_at 1.30729 BTB (POZ) domain containing 14B Btbd14b  
1443383\_at 1.03738 Muscleblind-like 3 (Drosophila) Mbnl3  
1443384\_at 1.64959 PTK2 protein tyrosine kinase 2 Ptk2  
1443385\_at 1.01477 RIKEN cDNA A930012N16 gene A930012N16Rik  
1443386\_at 1.03600 expressed sequence C86727 C86727  
1443387\_at 0.98354 expressed sequence BB045044 BB045044  
1443388\_at 1.33853 RIKEN cDNA 1300018I05 gene 1300018I05Rik  
1443389\_at 0.97249 EGL nine homolog 1 (C. elegans) Egl1  
1443390\_at 2.34275 Dedicator of cyto-kinesis 1 Dock1  
1443391\_at 0.85915 "5'-nucleotidase, cytosolic II" Nt5c2  
1443392\_at 1.02731 "Transient receptor potential cation channel, subfamily V, member 1" Trpv1  
1443393\_at 2.10114 SMAD specific E3 ubiquitin protein ligase 1 Smurf1  
1443394\_at 1.64906 High mobility group AT-hook 2 Hmga2  
1443395\_at 1.00733 "DNA segment, Chr 6, ERATO Doi 490, expressed" D6Ertd490e  
1443396\_at 1.16974 survival motor neuron domain containing 1 /// similar to survival motor neuron domain containing 1 Smndc1 /// LOC545792  
1443397\_at 1.01859 nuclear receptor coactivator 1 Ncoa1  
1443398\_at 0.97491 Synaptosomal-associated protein 25 Snap25  
1443399\_at 1.09782 expressed sequence AU021001 AU021001  
1443400\_at 1.37792 Mesoderm induction early response 1 homolog (Xenopus laevis) Mier1  
1443401\_at 1.01601 Astrotactin 2 Astn2  
1443402\_at 1.21055 Phosphorylase kinase alpha 2 Phka2  
1443403\_at 1.05956 RIKEN cDNA 4933428G09 gene 4933428G09Rik  
1443404\_s\_at 0.93822 "DNA segment, Chr 13, ERATO Doi 94, expressed" D13Ertd94e  
1443405\_at 0.99849 "9 days embryo whole body cDNA, RIKEN full-length enriched library, clone: D030059B04 product:unclassifiable, full insert sequence" ---

1443406\_at 1.04368 phospholipid scramblase 4 Plscr4  
1443407\_at 1.26698 ring finger protein 13 Rnf13  
1443408\_at 0.91094 Polo-like kinase 1 (Drosophila) Plk1  
1443409\_at 0.92239 expressed sequence C76434 C76434  
1443410\_at 1.07237 "Glutamate receptor, metabotropic 5" Grm5  
1443411\_at 0.93162 Spermatogenesis associated 9 Spata9  
1443412\_s\_at 1.00119 matrix metalloproteinase 16 Mmp16  
1443413\_s\_at 1.00046 "transient receptor potential cation channel, subfamily M, member 5" Trpm5  
1443414\_at 0.89740 EST C78513 C78513  
1443415\_at 0.96736 RIKEN cDNA 4931432P07 gene 4931432P07Rik  
1443416\_at 0.82020 expressed sequence C79741 C79741  
1443417\_at 1.00080 expressed sequence C87122 C87122  
1443418\_at 0.98270 Phosphoribosyl pyrophosphate synthetase 2 Prps2  
1443419\_at 0.93539 "DNA segment, Chr 5, ERATO Doi 525, expressed" D5Ertd525e  
1443420\_at 0.96158 Ubiquitin specific peptidase 8 Usp8  
1443421\_s\_at 0.96428 protocadherin beta 15 Pcdhb15  
1443422\_at 1.25313 RIKEN cDNA 2410089E03 gene /// hypothetical LOC546032 /// hypothetical protein LOC669465 2410089E03Rik /// LOC546032 /// LOC669465  
1443423\_at 0.88490 WNK lysine deficient protein kinase 2 /// hypothetical LOC624678 Wnk2 /// LOC624678  
1443424\_at 1.08120 RIKEN cDNA 2210018M11 gene 2210018M11Rik  
1443425\_at 0.94315 "A disintegrin-like and metalloproteinase (reprolysin type) with thrombospondin type 1 motif, 6" Adamts6  
1443426\_at 1.31975 "SAFB-like, transcription modulator" Sltm  
1443427\_at 0.93698 --- ---  
1443428\_at 1.02594 --- ---  
1443429\_at 1.04909 RIKEN cDNA E130310K16 gene E130310K16Rik  
1443430\_at 1.41299 CASP2 and RIPK1 domain containing adaptor with death domain Cradd  
1443431\_at 1.04800 --- ---  
1443432\_at 0.90328 expressed sequence AU022680 AU022680  
1443433\_at 0.92089 plexin C1 Plxnc1  
1443434\_s\_at 0.95275 plexin C1 Plxnc1  
1443435\_at 1.03039 RIKEN cDNA 3732413I11 gene 3732413I11Rik  
1443436\_at 1.08612 Mitogen activated protein kinase kinase 2 Map2k2  
1443437\_at 0.96063 similar to apobec-1 complementation factor LOC633285  
1443438\_at 1.09836 Nuclear receptor coactivator 1 Ncoa1  
1443439\_at 1.07452 Acyl-CoA synthetase short-chain family member 1 Acss1  
1443440\_at 1.07859 --- ---  
1443441\_x\_at 0.82892 similar to hypothetical protein FLJ14345 LOC380850  
1443442\_at 0.95414 expressed sequence AU022084 AU022084  
1443443\_at 0.94879 --- ---  
1443444\_at 0.97562 Mannoside acetylglucosaminyltransferase 5 Mgat5  
1443445\_at 1.43009 Diaphanous homolog 3 (Drosophila) Diap3

1443446\_at 0.98141 --- ---  
1443447\_at 1.01369 RIKEN cDNA 2010110K16 gene 2010110K16Rik  
1443448\_x\_at 0.97576 RIKEN cDNA 2010110K16 gene 2010110K16Rik  
1443449\_at 0.98115 --- ---  
1443450\_at 1.03028 "7 days neonate cerebellum cDNA, RIKEN full-length enriched library, clone:  
A730086M21 product:unclassifiable, full insert sequence" ---  
1443451\_at 1.08029 --- ---  
1443452\_at 1.03002 Elongation protein 3 homolog (S. cerevisiae) Elp3  
1443453\_at 0.89944 zinc finger protein 651 Zfp651  
1443454\_at 0.89262 secretin receptor Sctr  
1443455\_at 1.36831 CUE domain containing 1 Cuedc1  
1443456\_at 1.11067 RIKEN cDNA 6330416L07 gene 6330416L07Rik  
1443457\_at 1.10322 RIKEN cDNA A230055J12 gene A230055J12Rik  
1443458\_at 1.11514 RIKEN cDNA D630033O11 gene D630033O11Rik  
1443459\_at 1.06236 expressed sequence C86415 C86415  
1443460\_at 1.12658 --- ---  
1443461\_at 1.08234 expressed sequence C79130 C79130  
1443462\_at 1.03598 "DNA segment, Chr 8, ERATO Doi 572, expressed" D8Ertd572e  
1443463\_at 1.07328 Wingless-related MMTV integration site 5B Wnt5b  
1443464\_at 0.96034 "Syntrophin, basic 1" Sntb1  
1443465\_at 0.91063 --- ---  
1443466\_s\_at 1.07537 polymerase (RNA) III (DNA directed) polypeptide B Polr3b  
1443467\_at 1.57510 dedicator of cytokinesis 11 Dock11  
1443468\_at 0.90963 --- ---  
1443469\_at 0.93022 Transcribed locus ---  
1443470\_at 0.98266 RIKEN cDNA A530058N18 gene A530058N18Rik  
1443471\_at 1.20635 zinc finger and BTB domain containing 20 Zbtb20  
1443472\_at 1.20052 expressed sequence C77691 C77691  
1443473\_at 0.93785 expressed sequence C79562 C79562  
1443474\_at 0.97887 "DNA segment, Chr 7, ERATO Doi 495, expressed" D7Ertd495e  
1443475\_at 0.93425 "Histone 1, H3i" Hist1h3i  
1443476\_at 0.75448 "3 days neonate thymus cDNA, RIKEN full-length enriched library, clone:  
A630019K16 product:paired box gene 1, full insert sequence" ---  
1443477\_at 1.00009 "proteasome (prosome, macropain) 26S subunit, non-ATPase, 2 /// similar to  
proteasome 26S non-ATPase subunit 2 /// similar to proteasome 26S non-ATPase subunit 2" Psmd2 ///  
LOC432448 /// LOC672350  
1443478\_at 0.97843 expressed sequence C86695 C86695  
1443479\_at 0.88581 "7 days neonate cerebellum cDNA, RIKEN full-length enriched library, clone:  
A730096N24 product:unclassifiable, full insert sequence" ---  
1443480\_at 1.06115 --- ---  
1443481\_at 1.29383 epsilon-tubulin 1 Tube1  
1443482\_at 0.94926 RIKEN cDNA 1700124P09 gene 1700124P09Rik  
1443483\_at 1.05429 X-linked lymphocyte-regulated 5D Xlr5d

1443484\_at 0.97820 RNA polymerase II associated protein 1 Rpap1  
1443485\_at 0.85856 Eph receptor A7 Epha7  
1443486\_at 0.96679 Component of oligomeric golgi complex 7 Cog7  
1443487\_at 0.95688 expressed sequence AU022238 AU022238  
1443488\_at 1.06455 --- ---  
1443489\_at 1.53694 RIKEN cDNA C330002D13 gene C330002D13Rik  
1443490\_at 1.56825 "DNA segment, Chr 3, ERATO Doi 34, expressed" D3Ertd34e  
1443491\_at 1.39348 "Protein tyrosine phosphatase, receptor type, K" Ptpkr  
1443492\_at 1.02305 "Inositol 1,4,5-triphosphate receptor 1" Itpr1  
1443493\_at 1.02924 DEAH (Asp-Glu-Ala-His) box polypeptide 37 Dhx37  
1443494\_at 0.93964 polymerase (RNA) III (DNA directed) polypeptide B Polr3b  
1443495\_at 1.11578 Zinc finger protein 99 Zfp99  
1443496\_at 1.05573 ELMO domain containing 1 Elmod1  
1443497\_at 0.97539 Ankyrin repeat and BTB (POZ) domain containing 2 Abtb2  
1443498\_at 1.27541 methylmalonic aciduria (cobalamin deficiency) type B homolog (human)  
Mmab  
1443499\_at 1.05905 hypothetical protein A430075N02 A430075N02  
1443500\_at 1.14543 Myeloid/lymphoid or mixed lineage-leukemia translocation to 10 homolog  
(Drosophila) Mllt10  
1443501\_at 1.05837 "Transcribed locus, moderately similar to XP\_345375.2 PREDICTED: similar  
to Homeobox protein Hox-D8 (Hox-4.3) (Hox-5.4) [Rattus norvegicus]" ---  
1443502\_at 0.96734 baculoviral IAP repeat-containing 7 (livin) Birc7  
1443503\_at 1.08443 inositol hexaphosphate kinase 3 Ihpk3  
1443504\_at 1.06425 hypothetical protein E330022O07 E330022O07  
1443505\_at 0.96626 Prokineticin 1 Prok1  
1443506\_at 1.01680 potassium channel tetramerisation domain containing 2 Kctd2  
1443507\_at 1.06696 "Solute carrier family 4 (anion exchanger), member 1, adaptor protein"  
Slc4a1ap  
1443508\_at 1.03736 "discs, large (Drosophila) homolog-associated protein 1" Dlgap1  
1443509\_at 0.97601 Cadherin 1 Cdh1  
1443510\_at 1.00515 expressed sequence AW822216 AW822216  
1443511\_at 0.80408 RAR-related orphan receptor alpha Rora  
1443512\_at 1.59812 Spermatogenesis associated 5 Spata5  
1443513\_at 1.53210 Transcribed locus ---  
1443514\_at 0.96265 --- ---  
1443515\_at 1.03431 RIKEN cDNA 1110032F04 gene 1110032F04Rik  
1443516\_at 2.45120 Ataxin 2 Atxn2  
1443517\_at 1.33417 RIKEN cDNA 6030443O07 gene 6030443O07Rik  
1443518\_at 0.89914 "sarcoglycan, epsilon" Sgce  
1443519\_at 1.07547 --- ---  
1443520\_at 0.97661 Expressed sequence AU022870 AU022870  
1443521\_at 2.27607 Gametogenetin binding protein 2 Ggnbp2  
1443522\_s\_at 1.11361 pleckstrin homology domain interacting protein Phip

1443523\_at 0.96745 --- ---  
1443524\_x\_at 1.01510 B-cell leukemia/lymphoma 10 Bcl10  
1443525\_at 1.00039 Developing brain homeobox 2 Dbx2  
1443526\_at 2.94218 --- ---  
1443527\_at 1.40789 telomeric repeat binding factor 1 Terf1  
1443528\_at 1.01092 tau tubulin kinase 1 Ttbk1  
1443529\_at 0.99921 RUN and TBC1 domain containing 2 Rutbc2  
1443530\_at 0.92955 Musashi homolog 2 (Drosophila) Msi2  
1443531\_at 1.08866 RIKEN cDNA A930005I04 gene A930005I04Rik  
1443532\_at 1.13530 --- ---  
1443533\_at 1.99156 "Protein phosphatase 2, regulatory subunit B (B56), epsilon isoform" Ppp2r5e  
1443534\_at 1.41138 --- ---  
1443535\_at 2.61502 RAB GTPase activating protein 1 Rabgap1  
1443536\_at 1.01998 "solute carrier family 7 (cationic amino acid transporter, y+ system), member 11" Slc7a11  
1443537\_at 1.12206 RIKEN cDNA C130009A20 gene C130009A20Rik  
1443538\_at 0.94318 --- ---  
1443539\_at 0.83799 Rho guanine nucleotide exchange factor (GEF) 11 Arhgef11  
1443540\_at 1.27426 mitogen activated protein kinase kinase kinase 1 /// similar to Mitogen-activated protein kinase kinase kinase 1 (MAPK/ERK kinase kinase 1) (MEK kinase 1) (MEKK 1) /// similar to Mitogen-activated protein kinase kinase kinase 1 (MAPK/ERK kinase kinase 1) (MEK kinase 1) (MEKK 1) Map3k1 /// LOC670493 /// LOC674573  
1443541\_at 0.83617 Hypothetical gene supported by AK039231; AK039519; AK039710; AK045832 LOC381438  
1443542\_at 0.97963 --- ---  
1443543\_at 0.96172 "Adult male olfactory brain cDNA, RIKEN full-length enriched library, clone:6430501N10 product:unclassifiable, full insert sequence" ---  
1443544\_at 1.11912 "DNA segment, Chr 18, ERATO Doi 653, expressed" D18Ertd653e  
1443545\_at 1.07043 "CUG triplet repeat, RNA binding protein 2" Cugbp2  
1443546\_at 1.36311 High density lipoprotein (HDL) binding protein Hdlbp  
1443547\_at 1.12567 --- ---  
1443548\_at 0.96184 "Ankyrin 2, brain" Ank2  
1443549\_at 1.10552 RIKEN cDNA 4930579E17 gene 4930579E17Rik  
1443550\_at 0.93181 ClpB caseinolytic peptidase B homolog (E. coli) Clpb  
1443551\_at 1.23704 "ATPase, Ca++ transporting, cardiac muscle, slow twitch 2" Atp2a2  
1443552\_at 0.88682 RIKEN cDNA E230008N13 gene E230008N13Rik  
1443553\_at 1.03553 --- ---  
1443554\_at 1.04438 Single-stranded DNA binding protein 3 Ssbp3  
1443555\_at 1.09025 --- ---  
1443556\_at 0.96574 RIKEN cDNA 1110007F12 gene 1110007F12Rik  
1443557\_at 1.45095 --- ---  
1443558\_s\_at 1.03323 RIKEN cDNA C630002B14 gene C630002B14Rik  
1443559\_at 1.06253 RIKEN cDNA 1500011J06 gene 1500011J06Rik

1443560\_at 0.94036 "Adult male testis cDNA, RIKEN full-length enriched library, clone:4930506M03 product:hypothetical protein, full insert sequence" ---  
1443561\_at 1.01066 Myeloid ecotropic viral integration site-related gene 1 Mrg1  
1443562\_at 1.03277 RIKEN cDNA 2610017I09 gene 2610017I09Rik  
1443563\_at 1.03688 --- ---  
1443564\_at 0.86062 --- ---  
1443565\_at 1.01566 expressed sequence AI849538 AI849538  
1443566\_at 1.15881 Insulin-like growth factor I receptor Igf1r  
1443567\_at 1.06137 cDNA sequence BC032203 BC032203  
1443568\_x\_at 0.92966 --- ---  
1443569\_at 1.01839 RIKEN cDNA 4930430E16 gene 4930430E16Rik  
1443570\_at 1.03224 "COP9 (constitutive photomorphogenic) homolog, subunit 3 (Arabidopsis thaliana)" Cops3  
1443571\_at 1.00577 Transcribed locus ---  
1443572\_at 0.92705 --- ---  
1443573\_at 1.05129 "poly (ADP-ribose) polymerase family, member 1" Parp1  
1443574\_at 0.93617 hypothetical protein 6530439I21 6530439I21  
1443575\_at 0.97268 RIKEN cDNA 2310040G24 gene 2310040G24Rik  
1443576\_at 1.03498 Transcribed locus ---  
1443577\_at 0.93445 "Adult male testis cDNA, RIKEN full-length enriched library, clone:4930422D11 product:unclassifiable, full insert sequence" ---  
1443578\_at 0.90291 Transcribed locus ---  
1443579\_s\_at 0.78797 DEP domain containing 6 Depdc6  
1443580\_at 0.98667 Syntaxin binding protein 6 (amisyn) Stxbp6  
1443581\_at 1.07717 "Beta galactoside alpha 2,6 sialyltransferase 1" St6gal1  
1443582\_at 0.92823 similar to growth arrest-specific 2 like 2; GAS2-related protein RP23-249K18.2  
1443583\_at 1.04014 RIKEN cDNA C030010B13 gene C030010B13Rik  
1443584\_at 0.84992 RIKEN cDNA 1110028C15 gene 1110028C15Rik  
1443585\_at 0.98699 zinc finger protein 526 Zfp526  
1443586\_at 1.56982 FIP1 like 1 (S. cerevisiae) Fip111  
1443587\_at 0.93239 cDNA sequence AK129128 AK129128  
1443588\_at 1.05484 Transcribed locus ---  
1443589\_at 1.01322 "DNA segment, Chr X, ERATO Doi 242, expressed" DXErtd242e  
1443590\_at 1.10777 --- ---  
1443591\_at 1.23480 distal-less homeobox 4 Dlx4  
1443592\_at 1.26195 expressed sequence AA617406 AA617406  
1443593\_at 1.01320 --- ---  
1443594\_at 1.07328 expressed sequence AI043046 AI043046  
1443595\_at 0.93950 "CCR4-NOT transcription complex, subunit 6-like" Cnot6l  
1443596\_at 0.98459 "PREDICTED: Mus musculus similar to SRY-box 13, transcript variant 2 (LOC621627), mRNA" ---  
1443597\_at 1.10323 "cofactor required for Sp1 transcriptional activation, subunit 2" Crsp2

|              |         |                                                                                                                                       |               |
|--------------|---------|---------------------------------------------------------------------------------------------------------------------------------------|---------------|
| 1443598_at   | 0.88341 | Similar to zinc finger protein 709                                                                                                    | LOC626854     |
| 1443599_at   | 1.00037 | DC-STAMP domain containing 1                                                                                                          | Dcst1         |
| 1443600_at   | 0.94443 | expressed sequence AA414992                                                                                                           | AA414992      |
| 1443601_at   | 1.10407 | Hypothetical protein LOC545677                                                                                                        | LOC545677     |
| 1443602_at   | 0.99882 | Interferon gamma receptor 1                                                                                                           | Ifngr1        |
| 1443603_at   | 1.48197 | Protein-L-isoaspartate (D-aspartate) O-methyltransferase domain containing 1                                                          | Pcmt1         |
| 1443604_at   | 1.03422 | ---                                                                                                                                   | ---           |
| 1443605_at   | 1.07125 | expressed sequence C81272                                                                                                             | C81272        |
| 1443606_at   | 1.06270 | Transcribed locus                                                                                                                     | ---           |
| 1443607_at   | 1.13379 | ---                                                                                                                                   | ---           |
| 1443608_at   | 0.84389 | ---                                                                                                                                   | ---           |
| 1443609_s_at | 0.88423 | "synovial apoptosis inhibitor 1, synoviolin"                                                                                          | Syvn1         |
| 1443610_at   | 0.90386 | Transcribed locus                                                                                                                     | ---           |
| 1443611_at   | 0.92845 | "DnaJ (Hsp40) homolog, subfamily B, member 4"                                                                                         | Dnajb4        |
| 1443612_at   | 0.84587 | Expressed sequence AI838058                                                                                                           | AI838058      |
| 1443613_x_at | 1.12491 | Activating signal cointegrator 1 complex subunit 2                                                                                    | Ascc2         |
| 1443614_at   | 1.03837 | Transcribed locus                                                                                                                     | ---           |
| 1443615_at   | 1.04081 | RIKEN cDNA 1110057K04 gene                                                                                                            | 1110057K04Rik |
| 1443616_at   | 0.99213 | Synaptophysin-like protein                                                                                                            | Sypl          |
| 1443617_at   | 1.02790 | SEC15-like 2 (S. cerevisiae)                                                                                                          | Sec15l2       |
| 1443618_at   | 0.92328 | PDZ domain containing 2                                                                                                               | Pdzd2         |
| 1443619_at   | 1.03035 | transmembrane protein 30A                                                                                                             | Tmem30a       |
| 1443620_at   | 0.84634 | Glypican 4                                                                                                                            | Gpc4          |
| 1443621_at   | 0.92633 | RIKEN cDNA 1700010H23 gene                                                                                                            | 1700010H23Rik |
| 1443622_at   | 0.98518 | Down syndrome critical region gene 3                                                                                                  | Dscr3         |
| 1443623_a_at | 0.95059 | "21 days neonate cerebellum cDNA, RIKEN full-length enriched library, clone: G630010A17 product:unclassifiable, full insert sequence" | ---           |
| 1443624_at   | 1.11027 | CDNA sequence BC013481                                                                                                                | BC013481      |
| 1443625_at   | 1.49804 | N-acetyltransferase 11                                                                                                                | Nat11         |
| 1443626_at   | 1.27800 | Chimerin (chimaerin) 2                                                                                                                | Chn2          |
| 1443627_at   | 0.81031 | ---                                                                                                                                   | ---           |
| 1443628_at   | 1.24011 | ---                                                                                                                                   | ---           |
| 1443629_at   | 1.09161 | neuron navigator 1                                                                                                                    | Nav1          |
| 1443630_at   | 0.98780 | ---                                                                                                                                   | ---           |
| 1443631_at   | 1.04393 | "Diacylglycerol kinase, beta"                                                                                                         | Dgkb          |
| 1443632_at   | 0.96237 | "obscurin, cytoskeletal calmodulin and titin-interacting RhoGEF"                                                                      | Obscn         |
| 1443633_at   | 0.96474 | RIKEN cDNA 1700086O06 gene                                                                                                            | 1700086O06Rik |
| 1443634_at   | 1.01821 | "7 days neonate cerebellum cDNA, RIKEN full-length enriched library, clone: A730097O22 product:unclassifiable, full insert sequence"  | ---           |
| 1443635_at   | 0.92213 | "gene model 128, (NCBI)"                                                                                                              | Gm128         |
| 1443636_at   | 0.94307 | "ATP-binding cassette, sub-family B (MDR/TAP), member 9"                                                                              | Abcb9         |
| 1443637_at   | 0.95603 | RIKEN cDNA 2900084M01 gene                                                                                                            | 2900084M01Rik |



|              |         |                                                                                                                                       |               |
|--------------|---------|---------------------------------------------------------------------------------------------------------------------------------------|---------------|
| 1443638_at   | 1.06049 | "Catenin (cadherin associated protein), delta 2"                                                                                      | Ctnnd2        |
| 1443639_at   | 1.02544 | Adenomatosis polyposis coli down-regulated 1                                                                                          | Apccd1        |
| 1443640_at   | 0.87755 | Zinc finger protein 617                                                                                                               | Zfp617        |
| 1443641_at   | 1.05724 | ---                                                                                                                                   | ---           |
| 1443642_at   | 0.90028 | TAO kinase 2                                                                                                                          | Taok2         |
| 1443643_at   | 1.04464 | ---                                                                                                                                   | ---           |
| 1443644_at   | 1.08903 | Brain and reproductive organ-expressed protein                                                                                        | Bre           |
| 1443645_at   | 0.96678 | RIKEN cDNA 1700026B20 gene                                                                                                            | 1700026B20Rik |
| 1443646_at   | 1.02884 | "immunoglobulin superfamily, member 10"                                                                                               | Igsf10        |
| 1443647_at   | 1.03690 | RAR-related orphan receptor alpha                                                                                                     | Rora          |
| 1443648_at   | 1.07583 | RIKEN cDNA 9530003O04 gene                                                                                                            | 9530003O04Rik |
| 1443649_at   | 2.78378 | "HECT, UBA and WWE domain containing 1"                                                                                               | Huwe1         |
| 1443650_at   | 1.00490 | Ankyrin repeat and SAM domain containing 1                                                                                            | Anks1         |
| 1443651_at   | 1.00539 | Polyhomeotic-like 3 (Drosophila)                                                                                                      | Phc3          |
| 1443652_x_at | 0.99359 | "sprouty protein with EVH-1 domain 1, related sequence"                                                                               | Spred1        |
| 1443653_at   | 0.96896 | ---                                                                                                                                   | ---           |
| 1443654_at   | 1.14228 | Ankyrin repeat and FYVE domain containing 1                                                                                           | Ankfy1        |
| 1443655_s_at | 1.02224 | "phosphatidylinositol 3-kinase, C2 domain containing, alpha polypeptide"                                                              | Pik3c2a       |
| 1443656_at   | 0.89676 | fucosyltransferase 8                                                                                                                  | Fut8          |
| 1443657_at   | 1.01243 | RIKEN cDNA 6330505N24 gene                                                                                                            | 6330505N24Rik |
| 1443658_at   | 1.09324 | "DNA segment, Chr 8, ERATO Doi 457, expressed"                                                                                        | D8Ert457e     |
| 1443659_at   | 0.85460 | Zinc finger protein 292                                                                                                               | Zfp292        |
| 1443660_at   | 0.94164 | Neuregulin 3                                                                                                                          | Nrg3          |
| 1443661_at   | 1.11212 | ---                                                                                                                                   | ---           |
| 1443662_at   | 1.02329 | "Catenin (cadherin associated protein), alpha 1"                                                                                      | Ctnna1        |
| 1443663_at   | 0.97515 | "Protein kinase, cGMP-dependent, type I"                                                                                              | Prkg1         |
| 1443664_s_at | 0.91608 | D164 sialomucin-like 2                                                                                                                | Cd164l2       |
| 1443665_at   | 1.09790 | Expressed sequence AI852444                                                                                                           | AI852444      |
| 1443666_at   | 1.05547 | Midline 1                                                                                                                             | Mid1          |
| 1443667_at   | 1.03193 | expressed sequence C79407                                                                                                             | C79407        |
| 1443668_x_at | 0.91975 | expressed sequence C79407                                                                                                             | C79407        |
| 1443669_at   | 1.04386 | "Zinc finger, FYVE domain containing 28"                                                                                              | Zfyve28       |
| 1443670_at   | 0.82118 | RIKEN cDNA 2010001J22 gene                                                                                                            | 2010001J22Rik |
| 1443671_x_at | 1.10170 | RIKEN cDNA 2010001J22 gene                                                                                                            | 2010001J22Rik |
| 1443672_at   | 0.96463 | "leucyl-tRNA synthetase, mitochondrial"                                                                                               | Lars2         |
| 1443673_x_at | 2.15301 | ---                                                                                                                                   | ---           |
| 1443674_at   | 0.94334 | "11 days embryo spinal cord cDNA, RIKEN full-length enriched library, clone: G630090G13 product:unclassifiable, full insert sequence" | ---           |
| 1443675_at   | 1.33235 | Enhancer of polycomb homolog 1 (Drosophila)                                                                                           | Epc1          |
| 1443676_at   | 1.06948 | "Solute carrier family 4 (anion exchanger), member 4"                                                                                 | Slc4a4        |
| 1443677_at   | 0.95539 | RIKEN cDNA E030011O05 gene                                                                                                            | E030011O05Rik |
| 1443678_at   | 1.31275 | "10 days neonate cerebellum cDNA, RIKEN full-length enriched library, clone:                                                          |               |

B930065L22 product:unclassifiable, full insert sequence" ---

1443679\_at 1.05386 RIKEN cDNA 2510003B16 gene 2510003B16Rik

1443680\_at 1.11701 Otx2 opposite strand transcript 1 Otx2os1

1443681\_at 1.11706 Expressed sequence AI595406 AI595406

1443682\_at 0.92363 expressed sequence AI662476 AI662476

1443683\_at 1.05121 "Protein tyrosine phosphatase, receptor type, J" Ptpnj

1443684\_at 0.88717 --- ---

1443685\_at 0.99818 RIKEN cDNA 6430526N21 gene 6430526N21Rik

1443686\_at 0.98431 "Histocompatibility 2, class II, locus Mb1" H2-DMb1

1443687\_x\_at 1.03591 "Histocompatibility 2, class II, locus Mb1" H2-DMb1

1443688\_at 0.98415 cDNA sequence BC050092 BC050092

1443689\_at 0.96626 Ubiquitin specific peptidase 32 Usp32

1443690\_at 1.09400 Transcribed locus ---

1443691\_at 0.94022 RIKEN cDNA 2410089E03 gene 2410089E03Rik

1443692\_at 1.05088 cDNA sequence BC057022 BC057022

1443693\_at 0.97991 expressed sequence AU022332 AU022332

1443694\_at 0.93815 regulator of G-protein signaling 20 Rgs20

1443695\_at 0.89258 hyaluronic acid binding protein 2 Habp2

1443696\_s\_at 0.80222 hyaluronic acid binding protein 2 Habp2

1443697\_at 1.21633 --- ---

1443698\_at 1.31480 F-box protein 39 Fbxo39

1443699\_at 0.84843 "protein tyrosine phosphatase, receptor type, K" Ptprk

1443700\_at 1.04073 B-cell CLL/lymphoma 9-like Bcl9l

1443701\_at 0.85218 cDNA sequence BC025575 BC025575

1443702\_at 1.11242 microtubule-associated protein 4 Mtap4

1443703\_at 0.97013 CD28 antigen Cd28

1443704\_at 0.83370 Adenylate cyclase 8 Adcy8

1443705\_at 0.88676 "DNA segment, Chr 14, ERATO Doi 171, expressed" D14Ertd171e

1443706\_at 1.01338 C1GALT1-specific chaperone 1 C1galt1c1

1443707\_at 1.00436 RIKEN cDNA 2900046B09 gene 2900046B09Rik

1443708\_at 1.05073 cDNA sequence BC068281 BC068281

1443709\_at 1.13143 Yippee-like 2 (Drosophila) Ypel2

1443710\_s\_at 0.92260 "spermatogenesis associated, serine-rich 1" Spats1

1443711\_at 0.99877 Chromodomain helicase DNA binding protein 8 Chd8

1443712\_x\_at 0.94858 Coiled-coil domain containing 82 Ccdc82

1443713\_at 0.93114 cell adhesion molecule with homology to L1CAM Chl1

1443714\_at 1.04493 RIKEN cDNA C530044N13 gene C530044N13Rik

1443715\_at 1.02033 similar to RNA binding motif protein 24 /// similar to RNA binding motif protein 24 /// similar to RNA binding motif protein 24 LOC380843 /// LOC638266 /// LOC666794

1443716\_at 0.98472 --- ---

1443717\_at 1.05126 dihydropyrimidine dehydrogenase Dpyd

1443718\_at 1.07165 Transcribed locus ---

1443719\_x\_at 0.99965 DEAD (Asp-Glu-Ala-Asp) box polypeptide 42 Ddx42

1443720\_s\_at 1.01315 "bone morphogenetic protein receptor, type 1B" Bmpr1b  
1443721\_x\_at 1.93459 strawberry notch homolog (Drosophila) Stno  
1443722\_at 0.93784 RIKEN cDNA 6030419C18 gene 6030419C18Rik  
1443723\_at 1.03080 "transient receptor potential cation channel, subfamily M, member 3" Trpm3  
1443724\_at 0.98882 junctophilin 3 Jph3  
1443725\_at 0.96512 --- ---  
1443726\_at 0.91723 SET and MYND domain containing 1 Smyd1  
1443727\_x\_at 1.00479 SET and MYND domain containing 1 Smyd1  
1443728\_at 0.96427 Transcribed locus ---  
1443729\_at 1.01958 metastasis suppressor 1 Mtss1  
1443730\_at 0.91538 RIKEN cDNA 9130404D14 gene 9130404D14Rik  
1443731\_at 0.97496 Transcribed locus ---  
1443732\_at 0.82712 "ATPase, H<sup>+</sup> transporting, lysosomal V0 subunit A4" Atp6v0a4  
1443733\_x\_at 1.02367 "polymerase (DNA-directed), delta 3, accessory subunit" Pold3  
1443734\_at 0.99578 "DNA segment, Chr 5, Wayne State University 148, expressed" D5Wsu148e  
1443735\_at 1.11680 CDNA sequence BC052688 BC052688  
1443736\_at 0.92930 "Tubulin tyrosine ligase-like family, member 10" Ttl10  
1443737\_at 0.89983 Exportin 6 Xpo6  
1443738\_at 0.94747 Phosphatidylserine synthase 2 Ptdss2  
1443739\_at 1.13833 LPS-responsive beige-like anchor Lrba  
1443740\_at 1.04094 "ST3 beta-galactoside alpha-2,3-sialyltransferase 6" St3gal6  
1443741\_x\_at 0.97128 Wolf-Hirschhorn syndrome candidate 1 (human) /// similar to Wolf-  
Hirschhorn syndrome candidate 1 protein isoform 1 Whsc1 /// LOC622397  
1443742\_x\_at 1.12834 Ubiquitin-conjugating enzyme E2R 2 Ube2r2  
1443743\_at 1.01294 RIKEN cDNA 1700054O13 gene 1700054O13Rik  
1443744\_at 0.94502 Deleted in colorectal carcinoma Dcc  
1443745\_s\_at 1.05506 dentin matrix protein 1 Dmp1  
1443746\_x\_at 0.82044 dentin matrix protein 1 Dmp1  
1443747\_at 1.16641 "DNA segment, Chr 3, ERATO Doi 300, expressed" D3Ertd300e  
1443748\_x\_at 0.94060 ankyrin repeat domain 44 Ankrd44  
1443749\_x\_at 1.11445 "solute carrier family 1 (glial high affinity glutamate transporter), member 3"  
Slc1a3  
1443750\_s\_at 1.11396 ribonuclease P 40 subunit (human) Rpp40  
1443751\_at 1.08629 "Calcium channel, voltage-dependent, beta 4 subunit" Cacnb4  
1443752\_at 0.97170 RIKEN cDNA E230008N13 gene E230008N13Rik  
1443753\_at 0.94410 Galactosamine (N-acetyl)-6-sulfate sulfatase Galns  
1443754\_x\_at 0.94131 Limbic system-associated membrane protein Lsamp  
1443755\_at 0.81973 --- ---  
1443756\_at 0.96029 "Serine (or cysteine) peptidase inhibitor, clade I, member 1" Serpini1  
1443757\_x\_at 0.88885 "DNA segment, Chr 1, ERATO Doi 161, expressed" D1Ertd161e  
1443758\_at 0.97291 WD repeat domain 18 Wdr18  
1443759\_at 1.06175 --- ---  
1443760\_at 0.94468 Deducator of cyto-kinesis 1 Dock1

1443761\_at 0.90455 nurim (nuclear envelope membrane protein) Nrm  
1443762\_s\_at 1.01854 SET binding factor 2 Sbf2  
1443763\_at 1.06982 Breast cancer 1 Brca1  
1443764\_x\_at 1.01448 "RAB27b, member RAS oncogene family" Rab27b  
1443765\_at 0.90974 RIKEN cDNA 1810058N05 gene 1810058N05Rik  
1443766\_x\_at 1.02147 RAB11 family interacting protein 4 (class II) Rab11fip4  
1443767\_at 1.01182 Protein-L-isoaspartate (D-aspartate) O-methyltransferase domain containing 1  
Pcmd1  
1443768\_at 1.09939 --- ---  
1443769\_at 0.94207 Transcribed locus ---  
1443770\_x\_at 0.92433 Autism susceptibility candidate 2 Aut2  
1443771\_x\_at 0.77658 MAD homolog 7 (Drosophila) Smad7  
1443772\_at 1.00498 --- ---  
1443773\_at 1.06719 YLP motif containing 1 Ylpm1  
1443774\_at 0.88907 zinc finger protein 406 Zfp406  
1443775\_x\_at 0.91111 zinc finger protein 406 Zfp406  
1443776\_at 0.97350 --- ---  
1443777\_at 1.04302 --- ---  
1443778\_at 0.88053 similar to Transcription factor SOX-4 LOC672274  
1443779\_s\_at 1.01232 ligand dependent nuclear receptor corepressor Lcor  
1443780\_at 0.97928 Transcribed locus ---  
1443781\_at 1.04957 --- ---  
1443782\_x\_at 0.93612 "cytochrome P450, family 20, subfamily A, polypeptide 1" Cyp20a1  
1443783\_x\_at 1.00376 "Histocompatibility 2, class II antigen A, alpha" H2-Aa  
1443784\_at 1.01988 RIKEN cDNA A230046K03 gene A230046K03Rik  
1443785\_x\_at 0.77355 PDZ and LIM domain 7 Pdlim7  
1443786\_at 0.87268 undifferentiated embryonic cell transcription factor 1 Utf1  
1443787\_x\_at 0.86659 Caspase 14 Casp14  
1443788\_at 0.95476 "Runt-related transcription factor 1; translocated to, 1 (cyclin D-related)"  
Runx1t1  
1443789\_x\_at 0.89446 "cytochrome c oxidase, subunit VIIIc" Cox8c  
1443790\_x\_at 0.81471 RIKEN cDNA 4930414L22 gene 4930414L22Rik  
1443791\_at 1.01576 RIKEN cDNA 4931406I20 gene 4931406I20Rik  
1443792\_at 1.09781 testis specific gene A14 Tsga14  
1443793\_x\_at 0.96361 integrator complex subunit 1 Ints1  
1443794\_x\_at 1.02807 nucleolar complex associated 4 homolog (S. cerevisiae) Noc4l  
1443795\_at 0.84651 transcription factor 19 Tcf19  
1443796\_at 0.93070 interleukin 16 Il16  
1443797\_at 0.97752 Alkylglycerone phosphate synthase Agps  
1443798\_at 0.93024 phosphatidylinositol 3-kinase catalytic delta polypeptide Pik3cd  
1443799\_at 0.97477 "Protein phosphatase 1, regulatory (inhibitor) subunit 14c" Ppp1r14c  
1443800\_at 0.98998 Ngg1 interacting factor 3-like 1 (S. pombe) Nif3l1  
1443801\_at 0.82843 Expressed sequence AW822216 AW822216

1443802\_at 1.05331 TRAF2 and NCK interacting kinase Tnik  
1443803\_x\_at 0.88240 homeo box A5 Hoxa5  
1443804\_at 0.88564 "Protein phosphatase 2 (formerly 2A), regulatory subunit B (PR 52), gamma isoform" Ppp2r2c  
1443805\_at 0.93684 dact 3 Dact3  
1443806\_x\_at 1.06487 Erythrocyte protein band 4.1-like 1 Epb4.111  
1443807\_x\_at 1.28995 cyclin F Ccnf  
1443808\_at 0.97286 "DNA segment, Chr 2, Brigham & Women's Genetics 1423 expressed" D2Bwg1423e  
1443809\_at 0.97905 Pleiotrophin Ptn  
1443810\_at 1.12969 testis-specific serine kinase 4 Tssk4  
1443811\_at 1.06643 "Protein kinase, cGMP-dependent, type I" Prkg1  
1443812\_x\_at 0.95656 "Protein kinase, cGMP-dependent, type I" Prkg1  
1443813\_x\_at 0.97688 branched chain ketoacid dehydrogenase kinase Bckdk  
1443814\_x\_at 0.84494 cathepsin H Ctsh  
1443815\_x\_at 0.97535 STE20-like kinase (yeast) Slk  
1443816\_s\_at 0.91055 expressed sequence BB220380 BB220380  
1443817\_x\_at 0.86157 "NK2 transcription factor related, locus 6 (Drosophila)" Nkx2-6  
1443818\_at 0.98291 --- ---  
1443819\_x\_at 1.01033 fission 1 (mitochondrial outer membrane) homolog (yeast) Fis1  
1443820\_x\_at 0.97541 "elongation of very long chain fatty acids (FEN1/Elo2, SUR4/Elo3, yeast)-like 1" Elovl1  
1443821\_at 0.96806 leukocyte cell-derived chemotaxin 2 Lect2  
1443822\_s\_at 0.97874 --- ---  
1443823\_s\_at 1.01513 "ATPase, Na+/K+ transporting, alpha 2 polypeptide" Atp1a2  
1443824\_s\_at 1.09992 carbonic anhydrase 7 Car7  
1443825\_x\_at 0.88367 sperm acrosome associated 3 Spaca3  
1443826\_x\_at 0.94402 multiple endocrine neoplasia 1 Men1  
1443827\_x\_at 0.89362 cDNA sequence BC004044 BC004044  
1443828\_x\_at 0.71876 HERPUD family member 2 Herpud2  
1443829\_x\_at 0.95444 Coenzyme A synthase Coasy  
1443830\_x\_at 0.93506 ring finger protein 103 Rnf103  
1443831\_s\_at 0.97517 "metallothionein-like 5, testis-specific (tesmin)" Mtl5  
1443832\_s\_at 0.82934 serum deprivation response Sdpr  
1443833\_at 0.91432 Transcribed locus ---  
1443834\_at 0.98149 Transcribed locus ---  
1443835\_x\_at 1.02255 RIKEN cDNA 1110014K08 gene /// hypothetical protein LOC664786 /// hypothetical protein LOC664849 /// hypothetical protein LOC669054 /// hypothetical protein LOC672175 1110014K08Rik /// LOC664786 /// LOC664849 /// LOC669054 /// LOC672175  
1443836\_x\_at 0.95316 WD repeat domain 48 Wdr48  
1443837\_x\_at 1.13089 B-cell leukemia/lymphoma 2 Bcl2  
1443838\_x\_at 1.15737 fatty acid desaturase 2 Fads2  
1443839\_at 1.01357 RIKEN cDNA 1700010H22 gene 1700010H22Rik

1443840\_x\_at 0.94989 RIKEN cDNA 1700010H22 gene 1700010H22Rik  
1443841\_x\_at 0.97724 --- ---  
1443842\_at 1.01762 ADP-ribosylation factor guanine nucleotide-exchange factor 2 (brefeldin A-inhibited) /// similar to ADP-ribosylation factor guanine nucleotide-exchange factor 2 (brefeldin A-inhibited) Arfgef2 /// LOC670796  
1443843\_x\_at 0.99844 similar to ribosomal protein L9 LOC433546  
1443844\_at 1.06346 RIKEN cDNA 1700123J19 gene 1700123J19Rik  
1443845\_x\_at 1.09825 RIKEN cDNA 1700012P22 gene 1700012P22Rik  
1443846\_x\_at 1.19606 Pantothenate kinase 2 (Hallervorden-Spatz syndrome) Pank2  
1443847\_x\_at 0.78710 Transcribed locus ---  
1443848\_at 1.69803 RNA binding motif protein 16 Rbm16  
1443849\_x\_at 1.06320 uroporphyrinogen decarboxylase Urod  
1443850\_at 0.95125 Transcribed locus ---  
1443851\_at 0.88673 RIKEN cDNA 8430415E04 gene 8430415E04Rik  
1443852\_at 1.03178 Transcribed locus ---  
1443853\_x\_at 0.91364 Scm-like with four mbt domains 1 Sfmbt1  
1443854\_at 1.01483 --- ---  
1443855\_at 1.07289 "potassium voltage gated channel, Shaw-related subfamily, member 1" Kcnc1  
1443856\_at 0.98163 --- ---  
1443857\_at 0.88045 hook homolog 3 (Drosophila) Hook3  
1443858\_at 0.87917 Tripartite motif protein 34 Trim34  
1443859\_at 1.13461 "rosbin, round spermatid basic protein 1" Rsbn1  
1443860\_at 0.99835 "protein tyrosine phosphatase, receptor type, D" Ptpkd  
1443861\_at 0.84165 cingulin-like 1 /// similar to cingulin-like 1 isoform 1 Cgnl1 /// LOC677485  
1443862\_at 2.05305 --- ---  
1443863\_at 0.96024 fibronectin type III domain containing 3a Fndc3a  
1443864\_at 1.01419 denticleless homolog (Drosophila) Dtl  
1443865\_at 1.06791 "gamma-aminobutyric acid (GABA-A) receptor, subunit alpha 2" Gabra2  
1443866\_at 1.00173 leucine-rich repeats and transmembrane domains 1 Lrtm1  
1443867\_at 1.21946 ankyrin repeat domain 12 Ankrd12  
1443868\_at 0.98101 ATPase type 13A3 Atp13a3  
1443869\_at 0.91765 RIKEN cDNA E430028B21 gene E430028B21Rik  
1443870\_at 1.28569 "ATP-binding cassette, sub-family C (CFTR/MRP), member 4" Abcc4  
1443871\_at 0.86568 "Mannosidase, alpha, class 1A, member 2" Man1a2  
1443872\_at 0.99316 Membrane-associated ring finger (C3HC4) 2 2-Mar  
1443873\_at 1.16259 --- ---  
1443874\_at 1.02345 RIKEN cDNA 2810002I04 gene 2810002I04Rik  
1443875\_at 1.12465 "gene model 603, (NCBI)" Gm603  
1443876\_at 0.92652 Calcium/calmodulin-dependent protein kinase II alpha Camk2a  
1443877\_a\_at 1.11612 Rap guanine nucleotide exchange factor (GEF) 6 Rapgef6  
1443878\_at 1.05427 Rap guanine nucleotide exchange factor (GEF) 6 Rapgef6  
1443879\_at 1.01834 --- ---  
1443880\_at 1.03633 zinc finger and BTB domain containing 39 Zbtb39

1443881\_at 1.01313 protein O-fucosyltransferase 1 Pofut1  
1443882\_at 1.23400 "Solute carrier family 26 (sulfate transporter), member 2" Slc26a2  
1443883\_at 1.08579 RIKEN cDNA 2610042O14 gene 2610042O14Rik  
1443884\_at 1.03779 thyroid adenoma associated Thada  
1443885\_at 0.96967 "7 days neonate cerebellum cDNA, RIKEN full-length enriched library, clone:  
A730060K18 product:unclassifiable, full insert sequence" ---  
1443886\_at 0.95683 "protein kinase C, zeta 2" Prkcz2  
1443887\_at 0.86017 ankyrin repeat domain 13c Ankrd13c  
1443888\_at 0.85420 Expressed sequence AU023762 AU023762  
1443889\_at 0.88487 RIKEN cDNA 9030619P08 gene 9030619P08Rik  
1443890\_at 0.97724 Transcribed locus ---  
1443891\_at 0.87540 RAD51-like 3 (S. cerevisiae) Rad51l3  
1443892\_at 0.97799 hypothetical LOC435970 /// similar to gonadotropin inducible ovarian  
transcription factor 2 LOC435970 /// LOC668620  
1443893\_at 1.06648 "Tyrosine 3-monooxygenase/tryptophan 5-monooxygenase activation protein,  
zeta polypeptide" Ywhaz  
1443894\_at 1.26013 Ecotropic viral integration site 2a Evi2a  
1443895\_at 1.12957 hypothetical protein LOC621440 /// hypothetical protein LOC633947 /// region  
containing hypothetical protein LOC621440; hypothetical protein LOC633947 LOC621440 ///  
LOC633947 /// LOC669138  
1443896\_at 0.89232 "TBC1 domain family, member 5" Tbc1d5  
1443897\_at 1.75793 DNA-damage inducible transcript 3 Ddit3  
1443898\_at 0.96043 B-cell CLL/lymphoma 7C Bcl7c  
1443899\_at 0.95901 cDNA sequence BC028799 /// RIKEN cDNA 4922501C03 gene BC028799 ///  
4922501C03Rik  
1443900\_at 0.87479 chromodomain helicase DNA binding protein 8 Chd8  
1443901\_at 0.92068 --- ---  
1443902\_at 0.91129 RIKEN cDNA 6430573F11 gene 6430573F11Rik  
1443903\_at 0.91746 "Protein phosphatase 1A, magnesium dependent, alpha isoform" Ppm1a  
1443904\_at 0.98070 "fatty acid desaturase domain family, member 6" Fads6  
1443905\_at 2.10711 "Splicing factor, arginine/serine-rich 8" Sfrs8  
1443906\_at 1.06167 CD55 antigen Cd55  
1443907\_at 0.87479 leucyl/cystinyl aminopeptidase Lnpep  
1443908\_at 0.91921 "0 day neonate thymus cDNA, RIKEN full-length enriched library, clone:  
A430069K07 product:unclassifiable, full insert sequence" ---  
1443909\_at 1.27444 "Cleavage stimulation factor, 3' pre-RNA, subunit 3" Cstf3  
1443910\_at 1.10990 RIKEN cDNA 6330408A02 gene 6330408A02Rik  
1443911\_at 1.16616 --- ---  
1443912\_at 0.98490 --- ---  
1443913\_at 0.96751 Vacuolar protein sorting 33A (yeast) Vps33a  
1443914\_at 0.79985 "Lipase-like, ab-hydrolase domain containing 2" Lip12  
1443915\_at 0.76511 mitochondrial ribosomal protein L47 Mrpl47  
1443916\_at 0.93098 RIKEN cDNA 2900026A02 gene 2900026A02Rik

1443917\_at 1.20944 transmembrane BAX inhibitor motif containing 4 Tmbim4  
1443918\_at 1.04995 RIKEN cDNA 2700050L05 gene 2700050L05Rik  
1443919\_at 0.84460 proline-rich transmembrane protein 3 Prrt3  
1443920\_at 0.82332 coiled-coil domain containing 66 Ccdc66  
1443921\_at 1.00882 RIKEN cDNA C130037N17 gene C130037N17Rik  
1443922\_at 1.11752 REST corepressor 3 Rcor3  
1443923\_at 0.82928 A kinase (PRKA) anchor protein 13 Akap13  
1443924\_at 1.09524 WNK lysine deficient protein kinase 3 Wnk3  
1443925\_at 0.96507 opposite strand transcription unit to Stag3 Gats  
1443926\_at 1.16243 Myeloid ecotropic viral integration site-related gene 1 Mrg1  
1443927\_at 0.95368 ubiquitin-activating enzyme E1-like 2 Ube1l2  
1443928\_at 0.83642 expressed sequence AI462064 AI462064  
1443929\_at 0.94886 "In vitro fertilized eggs cDNA, RIKEN full-length enriched library,  
clone:7420432F05 product:hypothetical protein, full insert sequence /// In vitro fertilized eggs cDNA,  
RIKEN full-length enriched library, clone:7420438K14 product:unclassifiable, full insert sequence"  
---  
1443930\_at 0.98581 cDNA sequence BC052046 BC052046  
1443931\_at 0.96905 "Cyclin B2, pseudogene" Ccnb2-ps  
1443932\_at 0.80154 kelch domain containing 1 Klhdc1  
1443933\_at 1.08713 membrane targeting (tandem) C2 domain containing 1 Mtac2d1  
1443934\_at 0.83613 RIKEN cDNA 9230110C19 gene 9230110C19Rik  
1443935\_at 0.91966 cDNA sequence BC032203 BC032203  
1443936\_at 1.05261 Olfactory receptor 976 Olfr976  
1443937\_at 1.20253 Expressed sequence AI790276 AI790276  
1443938\_at 0.91169 Transcribed locus ---  
1443939\_at 1.02128 similar to C05G5.5 /// similar to C05G5.5 /// similar to C05G5.5  
LOC230628 /// LOC666048 /// LOC670598  
1443940\_at 0.93676 leucine rich repeat containing 22 Lrrc22  
1443941\_at 0.94174 hypothetical gene supported by AK049058; BC025881 LOC433886  
1443942\_at 1.16570 "GA repeat binding protein, beta 2" Gabpb2  
1443943\_at 1.09469 pleiomorphic adenoma gene 1 Plag1  
1443944\_at 0.87460 RIKEN cDNA C530005A16 gene C530005A16Rik  
1443945\_at 0.89609 RIKEN cDNA C130073F10 gene C130073F10Rik  
1443946\_s\_at 0.92141 --- ---  
1443947\_at 0.96631 LIM and senescent cell antigen-like domains 1 Lims1  
1443948\_at 1.00130 tetratricopeptide repeat domain 9C Ttc9c  
1443949\_at 2.25999 "Protein phosphatase 2, regulatory subunit B (B56), epsilon isoform" Ppp2r5e  
1443950\_at 1.87609 RIKEN cDNA A630042L21 gene A630042L21Rik  
1443951\_at 1.21069 RIKEN cDNA C230076A16 gene C230076A16Rik  
1443952\_at 0.90157 thyroid hormone receptor alpha Thra  
1443953\_at 0.94446 testis expressed gene 2 Tex2  
1443954\_at 2.16046 RAD18 homolog (S. cerevisiae) Rad18  
1443955\_at 1.10517 --- ---





|                         |         |                                                                                             |               |
|-------------------------|---------|---------------------------------------------------------------------------------------------|---------------|
| 1443988_at              | 1.40620 | RIKEN cDNA B330012G18 gene                                                                  | B330012G18Rik |
| 1443989_at              | 0.99762 | tripartite motif protein 9                                                                  | Trim9         |
| 1443990_at              | 0.95202 | "neurotrophic tyrosine kinase, receptor, type 1"                                            | Ntrk1         |
| 1443991_at              | 0.82035 | dedicator of cyto-kinesis 1                                                                 | Dock1         |
| 1443992_at              | 1.05853 | Nipped-B homolog (Drosophila)                                                               | Nipbl         |
| 1443993_at              | 0.97231 | zinc finger CCCH type containing 12A                                                        | Zc3h12a       |
| 1443994_at              | 1.06172 | RIKEN cDNA 6030407O03 gene                                                                  | 6030407O03Rik |
| 1443995_at              | 0.95506 | "gene model 9, (NCBI)"                                                                      | Gm9           |
| 1443996_at              | 1.07005 | Fibroblast growth factor receptor 2                                                         | Fgfr2         |
| 1443997_at              | 0.97960 | RIKEN cDNA C130040D06 gene                                                                  | C130040D06Rik |
| 1443998_at              | 0.99619 | Transcribed locus                                                                           | ---           |
| 1443999_at              | 1.03108 | NIMA (never in mitosis gene a)-related expressed kinase 2                                   | Nek2          |
| 1444000_at              | 0.92462 | RIKEN cDNA B930059L03 gene                                                                  | B930059L03Rik |
| 1444001_at              | 0.87262 | Spermatid perinuclear RNA binding protein                                                   | Strbp         |
| 1444002_at              | 0.88653 | forkhead box L2                                                                             | Foxl2         |
| 1444003_at              | 1.39775 | lung-inducible neuralized-related C3HC4 RING domain protein                                 | Lincr         |
| 1444004_at              | 1.07138 | THO complex 2                                                                               | Thoc2         |
| 1444005_at              | 0.89391 | ---                                                                                         | ---           |
| 1444006_at              | 0.95946 | SET domain containing 2                                                                     | Setd2         |
| 1444007_at              | 0.81220 | RIKEN cDNA A830082K12 gene                                                                  | A830082K12Rik |
| 1444008_at              | 0.82520 | "H2A histone family, member Y2"                                                             | H2afy2        |
| 1444009_at              | 0.91220 | Ras association (RalGDS/AF-6) domain family 4                                               | Rassf4        |
| 1444010_at              | 1.06112 | hypothetical protein LOC668879 /// hypothetical protein LOC669500                           |               |
| LOC668879 /// LOC669500 |         |                                                                                             |               |
| 1444011_at              | 0.93312 | ---                                                                                         | ---           |
| 1444012_at              | 0.99595 | "Yip1 domain family, member 3"                                                              | Yipf3         |
| 1444013_at              | 1.02650 | RIKEN cDNA 5930412G12 gene                                                                  | 5930412G12Rik |
| 1444014_at              | 1.02867 | hypothetical protein LOC670853                                                              | LOC670853     |
| 1444015_at              | 1.03918 | Poly (A) polymerase alpha                                                                   | Papola        |
| 1444016_at              | 0.89434 | RIKEN cDNA C430014K04 gene                                                                  | C430014K04Rik |
| 1444017_at              | 1.68220 | Pellino 1                                                                                   | Peli1         |
| 1444018_at              | 0.87849 | RIKEN cDNA B930098A02 gene                                                                  | B930098A02Rik |
| 1444019_at              | 1.00426 | leucine rich repeat containing 19                                                           | Lrrc19        |
| 1444020_at              | 0.97089 | chondroitin sulfate proteoglycan 3                                                          | Cspg3         |
| 1444021_at              | 0.98450 | ---                                                                                         | ---           |
| 1444022_at              | 0.90149 | ---                                                                                         | ---           |
| 1444023_at              | 1.06203 | "ankyrin 2, brain"                                                                          | Ank2          |
| 1444024_at              | 0.98129 | excision repair cross-complementing rodent repair deficiency complementation group 6 - like | Ercc6l        |
| 1444025_at              | 1.09970 | ---                                                                                         | ---           |
| 1444026_at              | 1.08472 | expressed sequence AI593442                                                                 | AI593442      |
| 1444027_at              | 0.96036 | "solute carrier family 30 (zinc transporter), member 8"                                     | Slc30a8       |
| 1444028_s_at            | 0.98207 | dedicator of cytokinesis 9 /// similar to Dedicator of cytokinesis protein 9                |               |

(Cdc42 guanine nucleotide exchange factor zizimin 1) Dock9 /// LOC670309

1444029\_at 0.97914 "poly (ADP-ribose) polymerase family, member 11" Parp11

1444030\_at 1.03180 DCP1 decapping enzyme homolog b (S. cerevisiae) Dcp1b

1444031\_at 1.02600 --- ---

1444032\_at 0.95792 Kidney expressed gene 1 Keg1

1444033\_at 1.06173 Anaphase promoting complex subunit 10 Anapc10

1444034\_at 0.91851 Rap guanine nucleotide exchange factor (GEF) 4 Rapgef4

1444035\_at 0.86609 mesoderm development candiate 2 Mesdc2

1444036\_at 1.00664 "Protein phosphatase 2, regulatory subunit B (B56), alpha isoform" Ppp2r5a

1444037\_at 0.92023 "lectin, mannose-binding, 1" Lman1

1444038\_at 1.03244 expressed sequence AU015836 AU015836

1444039\_at 0.90103 dispatched homolog 2 (Drosophila) Disp2

1444040\_at 1.11504 leukocyte-associated Ig-like receptor 1 Lair1

1444041\_at 0.88614 expressed sequence AU041133 AU041133

1444042\_at 1.04845 thyroid hormone receptor interactor 11 Trip11

1444043\_at 1.69529 GLI-Kruppel family member GLI3 Gli3

1444044\_at 1.03210 "Neural precursor cell expressed, developmentally down-regulted gene 4" Nedd4

1444045\_at 0.91967 Transcribed locus ---

1444046\_at 1.09199 RIKEN cDNA D430041B17 gene D430041B17Rik

1444047\_at 0.98364 Potassium channel tetramerisation domain containing 8 Kctd8

1444048\_at 1.26527 Retinitis pigmentosa 9 homolog (human) Rp9h

1444049\_at 1.00252 "adenosine deaminase, tRNA-specific 1" Adat1

1444050\_at 0.97998 "PREDICTED: Mus musculus WNT1 inducible signaling pathway protein 3 (Wisp3), mRNA" ---

1444051\_at 1.03830 RIKEN cDNA 5830405N20 gene 5830405N20Rik

1444052\_at 1.22920 Transcribed locus ---

1444053\_at 0.94979 single-stranded DNA binding protein 1 Ssbp1

1444054\_at 1.01825 --- ---

1444055\_at 0.99962 Heparan sulfate (glucosamine) 3-O-sulfotransferase 3B1 Hs3st3b1

1444056\_at 1.42531 RIKEN cDNA 2900006B13 gene 2900006B13Rik

1444057\_at 1.22846 Transcribed locus ---

1444058\_at 1.05473 RIKEN cDNA 2310047C04 gene 2310047C04Rik

1444059\_at 0.96452 RIKEN cDNA 6330415G19 gene 6330415G19Rik

1444060\_at 1.02785 RIKEN cDNA 2610027K06 gene 2610027K06Rik

1444061\_at 1.08081 RIKEN cDNA A030004J04 gene A030004J04Rik

1444062\_at 1.12791 RIKEN cDNA 2900056L01 gene 2900056L01Rik

1444063\_at 0.87324 RIKEN cDNA 5430435G22 gene 5430435G22Rik

1444064\_at 1.24126 "SAM domain and HD domain, 1" Samhd1

1444065\_at 1.24580 Cytochrome b5 domain containing 2 Cyb5d2

1444066\_at 1.06607 GTPase activating protein and VPS9 domains 1 Gapvd1

1444067\_at 0.96363 phosphodiesterase 1C Pde1c

1444068\_at 1.11331 thyroid hormone receptor associated protein 1 Thrapp1

1444069\_at 0.99927 Autism susceptibility candidate 2 Aut2

1444070\_at 0.86628 --- ---  
 1444071\_at 0.79239 RIKEN cDNA 9630013A20 gene 9630013A20Rik  
 1444072\_at 0.82951 Transcribed locus ---  
 1444073\_at 0.82612 avian musculoaponeurotic fibrosarcoma (v-maf) AS42 oncogene homolog  
 Maf  
 1444074\_at 0.95785 synaptic nuclear envelope 2 /// similar to Nesprin-2 (Nuclear envelope spectrin  
 repeat protein 2) (Syne-2) (Synaptic nuclear envelope protein 2) (Nucleus and actin connecting element  
 protein) (NUANCE protein) Syne2 /// LOC677266  
 1444075\_at 1.02558 filamin A interacting protein 1 Filip1  
 1444076\_at 0.94017 zinc finger protein 81 Zfp81  
 1444077\_at 0.99431 Transcribed locus ---  
 1444078\_at 0.98566 "CD8 antigen, alpha chain /// similar to T-cell surface glycoprotein CD8 alpha  
 chain precursor (T-cell surface glycoprotein Lyt-2) /// similar to T-cell surface glycoprotein CD8 alpha  
 chain precursor (T-cell surface glycoprotein Lyt-2) (CD8a antigen)" Cd8a /// LOC636147 ///  
 LOC669166  
 1444079\_at 1.02693 defensin beta 8 Defb8  
 1444080\_at 0.90409 --- ---  
 1444081\_at 0.87094 RIKEN cDNA 5033428A16 gene 5033428A16Rik  
 1444082\_at 0.86327 RIKEN cDNA A730017C20 gene A730017C20Rik  
 1444083\_at 1.04425 titin Ttn  
 1444084\_at 0.96560 proline rich Gla (G-carboxyglutamic acid) 4 (transmembrane) /// similar to  
 Transmembrane gamma-carboxyglutamic acid protein 4 precursor (Proline-rich Gla protein 4) (Proline-  
 rich gamma-carboxyglutamic acid protein 4) Prrg4 /// LOC676960  
 1444085\_at 1.02773 "prenyl (solanesyl) diphosphate synthase, subunit 2" Pdss2  
 1444086\_at 0.67971 RIKEN cDNA E030049G20 gene E030049G20Rik  
 1444087\_at 1.30362 PRP38 pre-mRNA processing factor 38 (yeast) domain containing A Prpf38a  
 1444088\_at 0.97329 --- ---  
 1444089\_at 1.27118 spectrin beta 2 Spnb2  
 1444090\_at 0.96111 PML-RAR alpha-regulated adaptor molecule 1 Pram1  
 1444091\_a\_at 0.94170 RIKEN cDNA 6430571L13 gene 6430571L13Rik  
 1444092\_at 1.06831 RIKEN cDNA 9430025M13 gene 9430025M13Rik  
 1444093\_at 0.96671 RIKEN cDNA 4930557M11 gene 4930557M11Rik  
 1444094\_at 1.06934 --- ---  
 1444095\_a\_at 0.84594 --- ---  
 1444096\_at 3.08438 Zinc finger RNA binding protein Zfr  
 1444097\_at 1.05078 "meteorin, glial cell differentiation regulator-like" Metrnl  
 1444098\_at 1.13195 RIKEN cDNA 1700010H15 gene 1700010H15Rik  
 1444099\_at 0.93725 "PREDICTED: Mus musculus similar to apolipoprotein L, 3 (predicted),  
 transcript variant 2 (LOC278677), mRNA" ---  
 1444100\_at 1.05993 podoplanin Pdpn  
 1444101\_at 1.18434 outer dense fiber of sperm tails 2 Odf2  
 1444102\_at 0.91827 --- ---  
 1444103\_at 0.98501 Epithelial stromal interaction 1 (breast) Epsti1

1444104\_at 1.02781 --- ---  
1444105\_at 0.91004 "actin, alpha 2, smooth muscle, aorta" Acta2  
1444106\_at 1.04487 RIKEN cDNA D330012F22 gene D330012F22Rik  
1444107\_at 1.09423 RIKEN cDNA 9430029N19 gene 9430029N19Rik  
1444108\_at 1.07903 "Adult male liver tumor cDNA, RIKEN full-length enriched library, clone:  
C730040G13 product:unclassifiable, full insert sequence" ---  
1444109\_at 1.76619 RIKEN cDNA C130009A20 gene C130009A20Rik  
1444110\_at 1.03293 transcobalamin 2 Tcn2  
1444111\_at 1.06323 --- ---  
1444112\_at 0.80021 "6 days neonate head cDNA, RIKEN full-length enriched library,  
clone:5430409O07 product:unclassifiable, full insert sequence" ---  
1444113\_at 1.06528 Transcribed locus ---  
1444114\_at 1.49930 "Muskelin 1, intracellular mediator containing kelch motifs" Mkln1  
1444115\_at 0.97722 "PREDICTED: Mus musculus similar to membrane-associated ring finger  
(C3HC4) 2 (LOC623771), mRNA" ---  
1444116\_at 1.15510 "MAK10 homolog, amino-acid N-acetyltransferase subunit, (S. cerevisiae)"  
Mak10  
1444117\_at 1.02024 adhesion molecule with Ig like domain 1 Amigo1  
1444118\_at 1.00723 --- ---  
1444119\_at 1.02087 RIKEN cDNA B930006L02 gene B930006L02Rik  
1444120\_at 0.99327 bridging integrator 1 Bin1  
1444121\_at 0.93551 Transcribed locus ---  
1444122\_at 1.01141 RIKEN cDNA 4930518F03 gene 4930518F03Rik  
1444123\_at 1.01432 "PR domain containing 2, with ZNF domain" Prdm2  
1444124\_a\_at 1.19368 RIKEN cDNA E330017L17 gene E330017L17Rik  
1444125\_at 0.94749 "Platelet-activating factor acetylhydrolase, isoform 1b, beta1 subunit" Pafah1b1  
1444126\_at 1.58539 "Praja 2, RING-H2 motif containing" Pja2  
1444127\_at 0.96164 ankyrin repeat and SOCS box-containing protein 1 Asb1  
1444128\_at 1.07531 "Phosphatidylinositol-4-phosphate 5-kinase, type II, beta" Pip5k2b  
1444129\_at 1.03467 --- ---  
1444130\_at 1.74102 RIKEN cDNA 1700081L11 gene 1700081L11Rik  
1444131\_at 0.90166 RIKEN cDNA 2610101N10 gene 2610101N10Rik  
1444132\_at 1.13282 RIKEN cDNA 2310003H01 gene 2310003H01Rik  
1444133\_at 0.92911 WNK lysine deficient protein kinase 4 Wnk4  
1444134\_at 0.97642 v-abl Abelson murine leukemia oncogene 1 Abl1  
1444135\_at 0.91319 RIKEN cDNA 6332401O19 gene 6332401O19Rik  
1444136\_at 1.16387 Retinoic acid induced 12 Rai12  
1444137\_at 1.00803 RIKEN cDNA A430108G06 gene A430108G06Rik  
1444138\_at 1.06123 "cytochrome P450, family 2, subfamily r, polypeptide 1" Cyp2r1  
1444139\_at 0.92412 DNA-damage-inducible transcript 4-like Ddit4l  
1444140\_at 1.64672 --- ---  
1444141\_at 0.88249 sorting nexin 13 Snx13  
1444142\_at 0.95276 hypothetical LOC432591 /// hypothetical protein LOC639155

## LOC432591 /// LOC639155

1444143\_at 0.94789 RIKEN cDNA B230342M21 gene B230342M21Rik  
 1444144\_at 1.48388 RIKEN cDNA 5530400K22 gene 5530400K22Rik  
 1444145\_at 0.88034 Methyltransferase like 6 Mettl6  
 1444146\_at 0.91008 ring finger protein 20 Rnf20  
 1444147\_at 1.00783 proprotein convertase subtilisin/kexin type 2 Pcsk2  
 1444148\_at 0.97573 hypothetical LOC497253 LOC497253  
 1444149\_at 0.91047 zinc finger protein 96 Zfp96  
 1444150\_at 1.29806 erythrocyte protein band 4.1 Epb4.1  
 1444151\_at 1.00602 RIKEN cDNA 2600009P04 gene 2600009P04Rik  
 1444152\_at 1.01315 "CUG triplet repeat, RNA binding protein 2" Cugbp2  
 1444153\_at 0.90493 "16 days neonate heart cDNA, RIKEN full-length enriched library, clone:  
 D830033B01 product:unclassifiable, full insert sequence" ---  
 1444154\_at 1.11903 NADH dehydrogenase (ubiquinone) 1 alpha subcomplex 11 Ndufa11  
 1444155\_at 0.85319 Ninein Nin  
 1444156\_at 0.89976 RIKEN cDNA 9230112E08 gene 9230112E08Rik  
 1444157\_a\_at 0.95726 "jumonji, AT rich interactive domain 1C (Rbp2 like)" Jarid1c  
 1444158\_at 0.89277 "jumonji, AT rich interactive domain 1C (Rbp2 like)" Jarid1c  
 1444159\_at 1.36631 "Phosphatidylinositol-4-phosphate 5-kinase, type II, alpha" Pip5k2a  
 1444160\_at 1.02166 Polycystic kidney disease 1 like 3 Pkd113  
 1444161\_at 0.93165 RIKEN cDNA A530020G20 gene A530020G20Rik  
 1444162\_at 1.15983 fibroblast growth factor receptor substrate 2 Frs2  
 1444163\_at 1.09818 NIMA (never in mitosis gene a)-related expressed kinase 5 Nek5  
 1444164\_at 0.88532 FK506 binding protein 3 Fkbp3  
 1444165\_at 0.84811 layilin Layn  
 1444166\_at 1.02883 thyroid hormone responsive SPOT14 homolog (Rattus) Thrsp  
 1444167\_at 0.89548 Transcribed locus ---  
 1444168\_at 1.09006 xenotropic and polytropic retrovirus receptor 1 Xpr1  
 1444169\_at 1.16729 RIKEN cDNA 3110052M02 gene 3110052M02Rik  
 1444170\_at 0.87562 RIKEN cDNA 6030446N20 gene 6030446N20Rik  
 1444171\_at 1.08543 Programmed cell death 4 Pcd4  
 1444172\_at 0.95259 Transcribed locus ---  
 1444173\_at 1.02787 "8 days neonate male testis cDNA, RIKEN full-length enriched library, clone:  
 G630012C09 product:unclassifiable, full insert sequence" ---  
 1444174\_at 0.99541 "A disintegrin-like and metallopeptidase (reprolysin type) with thrombospondin  
 type 1 motif, 8" Adamts8  
 1444175\_at 1.41458 ADP-ribosylation factor guanine nucleotide-exchange factor 1(brefeldin A-  
 inhibited) Arfgef1  
 1444176\_at 1.17595 "ATPase, H+ transporting, lysosomal V0 subunit D2" Atp6v0d2  
 1444177\_at 0.92166 "PREDICTED: Mus musculus hypothetical protein LOC626058 (LOC626058),  
 mRNA" ---  
 1444178\_at 1.05748 hypothetical gene supported by AK028012 LOC433237  
 1444179\_at 1.01546 RIKEN cDNA A530023O14 gene A530023O14Rik

1444180\_at 1.31702 "12 days embryo spinal ganglion cDNA, RIKEN full-length enriched library, clone:D130055E11 product:unclassifiable, full insert sequence" ---  
1444181\_at 0.94348 "GTPase, IMAP family member 5" Gimap5  
1444182\_at 0.95801 RIKEN cDNA 2210010C17 gene 2210010C17Rik  
1444183\_at 1.26020 RIKEN cDNA C030013C21 gene C030013C21Rik  
1444184\_at 1.30807 "alkB, alkylation repair homolog 3 (E. coli)" Alkbh3  
1444185\_at 1.09099 Stromal interaction molecule 2 Stim2  
1444186\_at 1.14255 RIKEN cDNA 2900006B13 gene 2900006B13Rik  
1444187\_at 1.09545 similar to spermatogenesis associated glutamate (E)-rich protein 4d /// similar to cyclin-dependent kinase 6 LOC544917 /// LOC667335  
1444188\_at 0.98439 --- ---  
1444189\_at 0.96029 Transcribed locus ---  
1444190\_at 0.91652 RIKEN cDNA E030049G20 gene E030049G20Rik  
1444191\_at 1.06340 --- ---  
1444192\_at 1.12614 RIKEN cDNA 9630020C08 gene 9630020C08Rik  
1444193\_at 0.99949 "alcohol dehydrogenase, iron containing, 1" Adhfe1  
1444194\_at 3.69498 --- ---  
1444195\_at 1.82125 Required for meiotic nuclear division 5 homolog A (S. cerevisiae) Rmnd5a  
1444196\_at 0.93902 expressed sequence AI662501 AI662501  
1444197\_at 0.94986 RIKEN cDNA 9930116N10 gene 9930116N10Rik  
1444198\_at 1.00266 Dorso-medial telencephalon gene 2 Dmt2  
1444199\_at 0.72568 --- ---  
1444200\_at 0.88356 "DNA segment, Chr 19, ERATO Doi 386, expressed" D19Erttd386e  
1444201\_at 0.96852 centrosomal protein 135 Cep135  
1444202\_at 0.91456 zinc finger protein 703 Zfp703  
1444203\_at 0.98806 "PREDICTED: Mus musculus similar to HYPOTHETICAL PROTEIN ORF-1137 (LOC626244), mRNA" ---  
1444204\_at 0.93816 Homeo box B2 Hoxb2  
1444205\_at 1.24541 MAD homolog 4 (Drosophila) Smad4  
1444206\_at 0.87655 RIKEN cDNA A030001O10 gene A230042K10Rik  
1444207\_at 1.06879 Camello-like 3 Cml3  
1444208\_at 1.03307 "Dynein, axonemal, heavy chain 1" Dnahc1  
1444209\_at 0.85498 "DNA segment, Chr 19, ERATO Doi 737, expressed" D19Erttd737e  
1444210\_at 0.96019 --- ---  
1444211\_at 1.06739 Endonuclease G-like 1 Endogl1  
1444212\_at 0.97053 Huntingtin interacting protein 2 Hip2  
1444213\_at 1.06347 RIKEN cDNA 1700012D14 gene 1700012D14Rik  
1444214\_at 0.99857 RIKEN cDNA 2810484G07 gene 2810484G07Rik  
1444215\_at 1.02582 Protocadherin 9 Pcdh9  
1444216\_at 1.00569 empty spiracles homolog 1 (Drosophila) Emx1  
1444217\_at 1.22058 mitochondrial ribosomal protein L38 Mrpl38  
1444218\_at 1.51417 "DNA segment, Chr 19, ERATO Doi 737, expressed" D19Erttd737e  
1444219\_at 1.05478 cDNA sequence AY702103 AY702103

1444220\_at 1.37686 RIKEN cDNA 2410089E03 gene 2410089E03Rik  
1444221\_at 0.99514 "TBC1D12: TBC1 domain family, member 12" Tbc1d12  
1444222\_x\_at 0.97596 Transcribed locus ---  
1444223\_at 0.83709 hypocretin (orexin) receptor 2 Hcrtr2  
1444224\_at 1.11700 "Tumor necrosis factor, alpha-induced protein 8" Tnfaip8  
1444225\_at 0.95683 SH3-domain GRB2-like (endophilin) interacting protein 1 Sgip1  
1444226\_at 0.95527 forkhead box O3a Foxo3a  
1444227\_at 1.02697 Transcribed locus ---  
1444228\_s\_at 0.93645 hect (homologous to the E6-AP (UBE3A) carboxyl terminus) domain and  
RCC1 (CHC1)-like domain (RLD) 2 Herc2  
1444229\_at 1.04261 "nuclear receptor subfamily 2, group F, member 2" Nr2f2  
1444230\_at 1.05256 RIKEN cDNA 2900046D03 gene 2900046D03Rik  
1444231\_at 1.37808 "Zinc finger, DHHC domain containing 6" Zdhhc6  
1444232\_at 0.79513 "protein kinase, cGMP-dependent, type I" Prkg1  
1444233\_at 0.92437 G protein-coupled receptor 132 Gpr132  
1444234\_at 0.93136 --- ---  
1444235\_at 0.93099 RIKEN cDNA 1700025G04 gene 1700025G04Rik  
1444236\_at 0.95231 expressed sequence AW552393 AW552393  
1444237\_at 1.11917 RIKEN cDNA C330019G07 gene C330019G07Rik  
1444238\_at 1.00012 "7 days neonate cerebellum cDNA, RIKEN full-length enriched library, clone:  
A730093O14 product:unclassifiable, full insert sequence" ---  
1444239\_at 0.91397 CDNA sequence BC023488 BC023488  
1444240\_at 0.95408 SH3/ankyrin domain gene 1 Shank1  
1444241\_at 1.09928 WW domain containing adaptor with coiled-coil Wac  
1444242\_at 1.01424 --- ---  
1444243\_at 1.01923 "WAS protein family, member 3" Wasf3  
1444244\_at 0.82055 Transcribed locus ---  
1444245\_at 1.13978 RIKEN cDNA B230118H07 gene B230118H07Rik  
1444246\_at 1.37033 Chromodomain helicase DNA binding protein 2 Chd2  
1444247\_at 1.05986 expressed sequence C81557 C81557  
1444248\_at 0.98148 reticulocalbin 2 Rcn2  
1444249\_at 1.00384 Transcribed locus ---  
1444250\_at 1.01110 --- ---  
1444251\_x\_at 0.97850 "DNA segment, Chr 4, ERATO Doi 111, expressed" D4Ertd111e  
1444252\_at 1.01489 "0 day neonate eyeball cDNA, RIKEN full-length enriched library, clone:  
E130003J08 product:unclassifiable, full insert sequence" ---  
1444253\_at 0.85666 "a disintegrin-like and metallopeptidase (reprolysin type) with thrombospondin  
type 1 motif, 18" Adamts18  
1444254\_at 0.91764 tensin 4 Tns4  
1444255\_at 1.01064 RIKEN cDNA D630045J12 gene D630045J12Rik  
1444256\_at 1.10173 RAE1 RNA export 1 homolog (S. pombe) Rae1  
1444257\_at 1.25328 proline rich 11 Prr11  
1444258\_at 1.53520 Actinin alpha 4 Actn4



1444259\_at 0.78961 Dimethylglycine dehydrogenase precursor Dmgdh  
 1444260\_at 0.87800 "Transcribed locus, weakly similar to XP\_573711.1 PREDICTED: similar to ORF2 consensus sequence encoding endonuclease and reverse transcriptase minus RNaseH [Rattus norvegicus]" ---  
 1444261\_at 1.08545 --- ---  
 1444262\_at 0.82518 RIKEN cDNA 1110017F19 gene 1110017F19Rik  
 1444263\_at 0.96918 Enhancer of zeste homolog 2 (Drosophila) Ezh2  
 1444264\_at 1.16470 "Tumor necrosis factor superfamily, member 5-induced protein 1" Tnfsf5ip1  
 1444265\_at 1.13265 --- ---  
 1444266\_at 1.16386 Homeobox only domain Hod  
 1444267\_at 0.89765 Xenotropic and polytropic retrovirus receptor 1 Xpr1  
 1444268\_at 1.34946 cDNA sequence BC004004 BC004004  
 1444269\_at 1.12906 --- ---  
 1444270\_at 1.05746 radial spokehead-like 3 Rshl3  
 1444271\_at 0.98201 anaphase promoting complex subunit 1 Anapc1  
 1444272\_at 0.93595 PDZ domain containing 6 Pdzd6  
 1444273\_at 2.40158 expressed sequence AW555355 AW555355  
 1444274\_at 0.99565 --- ---  
 1444275\_at 1.04001 Uronyl-2-sulfotransferase Ust  
 1444276\_at 0.98750 immature colon carcinoma transcript 1 Ict1  
 1444277\_at 1.03436 "Adult male liver tumor cDNA, RIKEN full-length enriched library, clone: C730026F15 product:unclassifiable, full insert sequence" ---  
 1444278\_at 0.98718 --- ---  
 1444279\_at 1.61931 "HECT, UBA and WWE domain containing 1" Huwe1  
 1444280\_at 0.95324 RIKEN cDNA A930001M12 gene A930001M12Rik  
 1444281\_at 0.94894 "Calcium/calmodulin-dependent protein kinase II, delta" Camk2d  
 1444282\_at 1.01059 Sterile alpha motif domain containing 10 Samd10  
 1444283\_at 1.02715 "GTPase, IMAP family member 7" Gimap7  
 1444284\_at 0.99121 RIKEN cDNA A130050O07 gene A130050O07Rik  
 1444285\_at 1.12870 Mortality factor 4 like 1 Morf411  
 1444286\_at 0.93319 "Transcribed locus, weakly similar to XP\_530798.1 PREDICTED: hypothetical protein XP\_530798 [Pan troglodytes]" ---  
 1444287\_at 0.92484 expressed sequence AI853106 AI853106  
 1444288\_at 0.90387 polyribonucleotide nucleotidyltransferase 1 Pnpt1  
 1444289\_at 0.86458 "Yip1 domain family, member 5" Yipf5  
 1444290\_at 1.15607 six transmembrane epithelial antigen of prostate 2 Steap2  
 1444291\_at 1.02670 "LysM, putative peptidoglycan-binding, domain containing 4" Lysmd4  
 1444292\_at 0.99030 "DNA segment, Chr 7, ERATO Doi 143, expressed" D7Ert143e  
 1444293\_at 0.90126 cDNA sequence BC028471 BC028471  
 1444294\_at 0.91741 "Adult male testis cDNA, RIKEN full-length enriched library, clone:4930551A22 product:unclassifiable, full insert sequence" ---  
 1444295\_at 1.66944 neogenin Neo1  
 1444296\_a\_at 0.98673 "serine (or cysteine) peptidase inhibitor, clade A, member 4, pseudogene 1"

## Serpina4-ps1

1444297\_at 0.91607 "serine (or cysteine) peptidase inhibitor, clade A, member 4, pseudogene 1"

Serpina4-ps1

1444298\_at 1.10071 RIKEN cDNA A130090K04 gene A130090K04Rik

1444299\_at 1.09707 RIKEN cDNA A430093F15 gene A430093F15Rik

1444300\_at 0.96116 G protein-coupled receptor 125 Gpr125

1444301\_at 0.97710 protocadherin 10 Pcdh10

1444302\_at 0.87887 cDNA sequence BC049816 BC049816

1444303\_at 1.01190 MAP/microtubule affinity-regulating kinase 2 Mark2

1444304\_at 0.96156 RIKEN cDNA A330102K23 gene A330102K23Rik

1444305\_at 0.90545 hypothetical protein LOC668940 /// hypothetical protein LOC669705 ///  
hypothetical protein LOC674786 LOC668940 /// LOC669705 /// LOC674786

1444306\_at 1.05181 Musashi homolog 1(Drosophila) Msi1

1444307\_at 1.20266 Transcribed locus ---

1444308\_at 0.93170 --- ---

1444309\_at 0.99072 "Succinate-Coenzyme A ligase, GDP-forming, beta subunit" Suclg2

1444310\_at 1.01806 polymerase (RNA) III (DNA directed) polypeptide A Polr3a

1444311\_at 0.86632 --- ---

1444312\_at 0.88096 "solute carrier family 22 (organic anion/cation transporter), member 15"

Slc22a15

1444313\_at 1.02221 Dymeclin Dym

1444314\_at 1.15289 RIKEN cDNA 4921506I22 gene 4921506I22Rik

1444315\_at 1.15760 RIKEN cDNA D630024D03 gene D630024D03Rik

1444316\_at 1.01112 --- ---

1444317\_at 1.05713 protocadherin 15 Pcdh15

1444318\_at 0.94867 Coiled-coil-helix-coiled-coil-helix domain containing 7 Chchd7

1444319\_at 0.84657 E2F transcription factor 8 E2f8

1444320\_at 1.32623 DDHD domain containing 2 Ddhd2

1444321\_at 0.95978 "Proteasome (prosome, macropain) 26S subunit, non-ATPase, 9" Psmc9

1444322\_at 0.81940 lipocalin 11 Lcn11

1444323\_at 1.04051 cyclin D3 Ccnd3

1444324\_at 0.91772 RIKEN cDNA E530001K10 gene E530001K10Rik

1444325\_at 0.99317 Phosphatase and tensin homolog Pten

1444326\_at 1.31644 "Prolyl 4-hydroxylase, beta polypeptide" P4hb

1444327\_at 0.78976 "E3 ubiquitin protein ligase, HECT domain containing, 1" Edd1

1444328\_at 1.35998 "clathrin, light polypeptide (Lca)" Clta

1444329\_at 1.01380 glutamine fructose-6-phosphate transaminase 1 Gfpt1

1444330\_at 1.23904 "DNA segment, Chr 2, ERATO Doi 173, expressed" D2Ert173e

1444331\_at 1.02939 Synaptoporin Synpr

1444332\_at 0.87857 RIKEN cDNA 9130019P16 gene 9130019P16Rik

1444333\_at 1.80441 --- ---

1444334\_at 0.94562 --- ---

1444335\_at 0.99578 "ER degradation enhancer, mannosidase alpha-like 2" Edem2

1444336\_at 1.00338 "Potassium inwardly-rectifying channel, subfamily J, member 3" Kcnj3  
1444337\_at 1.24635 Numb gene homolog (Drosophila) Numb  
1444338\_at 1.04035 --- ---  
1444339\_at 0.91487 "0 day neonate kidney cDNA, RIKEN full-length enriched library, clone:  
D630003P16 product:unclassifiable, full insert sequence" ---  
1444340\_at 1.13591 RIKEN cDNA C230066G23 gene C230066G23Rik  
1444341\_at 0.92448 RIKEN cDNA 8030451F13 gene 8030451F13Rik  
1444342\_at 1.06548 Transcribed locus ---  
1444343\_at 1.67019 RIKEN cDNA A130064L14 gene A130064L14Rik  
1444344\_at 1.00673 --- ---  
1444345\_at 1.03332 Transcribed locus ---  
1444346\_at 1.05231 SH3-domain binding protein 5 (BTK-associated) Sh3bp5  
1444347\_at 1.03955 "mannoside acetylglucosaminyltransferase 4, isoenzyme A" Mgat4a  
1444348\_at 0.86692 --- ---  
1444349\_at 1.24280 --- ---  
1444350\_at 1.14852 similar to schlafen 10 LOC672855  
1444351\_at 1.11489 Cytoplasmic FMR1 interacting protein 2 Cyfip2  
1444352\_at 0.93726 zinc finger protein 287 Zfp287  
1444353\_at 1.01798 RIKEN cDNA C030040A22 gene C030040A22Rik  
1444354\_at 1.07357 "AF4/FMR2 family, member 3" Aff3  
1444355\_at 1.01651 "ATPase, aminophospholipid transporter (APLT), class I, type 8A, member  
1" Atp8a1  
1444356\_at 0.91928 Rab6 interacting protein 2 Rab6ip2  
1444357\_at 0.95105 A kinase (PRKA) anchor protein 6 Akap6  
1444358\_at 1.38844 F-box and leucine-rich repeat protein 11 Fbxl11  
1444359\_at 0.99639 RIKEN cDNA 2500002G23 gene 2500002G23Rik  
1444360\_at 0.94002 CDNA sequence BC038822 BC038822  
1444361\_at 0.99966 --- ---  
1444362\_at 1.08069 neurogenic differentiation 2 Neurod2  
1444363\_at 0.92425 "10 days neonate cortex cDNA, RIKEN full-length enriched library, clone:  
A830040F21 product:unclassifiable, full insert sequence" ---  
1444364\_at 1.20826 REST corepressor 3 Rcor3  
1444365\_at 1.05231 TSC22 domain family 3 Tsc22d3  
1444366\_at 1.09499 TAO kinase 3 Taok3  
1444367\_at 1.02264 fibronectin type III domain containing 7 Fndc7  
1444368\_at 1.02184 --- ---  
1444369\_at 1.00176 RIKEN cDNA 2310016D23 gene 2310016D23Rik  
1444370\_at 0.83953 expressed sequence C77058 C77058  
1444371\_at 1.15572 RIKEN cDNA A630007B06 gene A630007B06Rik  
1444372\_at 1.31082 Archain 1 Arcn1  
1444373\_at 1.00212 T-cell lymphoma invasion and metastasis 1 Tiam1  
1444374\_at 1.05120 "PREDICTED: Mus musculus hypothetical LOC381451 (LOC381451),  
mRNA" ---

1444375\_at 0.96359 Transcribed locus ---  
1444376\_at 1.16693 Sestrin 1 Sesn1  
1444377\_at 1.39855 "Proteasome (prosome, macropain) subunit, beta type 2" Psmb2  
1444378\_at 1.73923 "Casein kinase 1, delta" Csnk1d  
1444379\_at 0.87178 PWWP domain containing 2 Pwwp2  
1444380\_at 0.90276 expressed sequence AI844869 AI844869  
1444381\_at 1.13463 RIKEN cDNA A830005F24 gene A830005F24Rik  
1444382\_at 1.03081 RIKEN cDNA 4930579G22 gene 4930579G22Rik  
1444383\_at 0.92961 RIKEN cDNA 1110014J01 gene 1110014J01Rik  
1444384\_at 1.43561 Expressed sequence AI591476 AI591476  
1444385\_at 1.27595 TAO kinase 1 Taok1  
1444386\_at 0.86441 phosphodiesterase 1C Pde1c  
1444387\_at 1.28591 N-myristoyltransferase 2 Nmt2  
1444388\_at 1.03361 Transcribed locus ---  
1444389\_at 0.94355 "DNA segment, Chr 14, ERATO Doi 426, expressed" D14Ertd426e  
1444390\_at 0.87405 PR domain containing 14 /// similar to PR domain containing 14 Prdm14 ///  
LOC637693  
1444391\_at 0.94116 Transcribed locus ---  
1444392\_at 1.15411 Leprecan-like 1 Leprel1  
1444393\_at 1.08746 Regulating synaptic membrane exocytosis 1 Rims1  
1444394\_at 1.00591 "acyl-Coenzyme A dehydrogenase family, member 9" Acad9  
1444395\_at 0.85511 DIX domain containing 1 Dixdc1  
1444396\_at 1.13577 Tumor protein p53 inducible nuclear protein 2 Trp53inp2  
1444397\_at 0.92451 sperm flagellar 1 Spef1  
1444398\_at 1.10291 "fascin homolog 1, actin bundling protein (Strongylocentrotus purpuratus)"  
Fscn1  
1444399\_at 1.02725 RIKEN cDNA 5830411E10 gene 5830411E10Rik  
1444400\_at 1.09386 retinoblastoma 1 Rb1  
1444401\_at 1.36931 Expressed sequence C80913 C80913  
1444402\_at 1.24631 zinc finger CCCH type containing 12C Zc3h12c  
1444403\_at 0.98500 "Core-binding factor, runt domain, alpha subunit 2, translocated to, 2 homolog  
(human)" Cbfa2t2h  
1444404\_at 0.88261 RIKEN cDNA 330010C22 gene D330010C22Rik  
1444405\_at 1.01015 RIKEN cDNA E430029J22 gene E430029J22Rik  
1444406\_at 2.12310 Mitogen-activated protein kinase kinase kinase kinase 3 Map4k3  
1444407\_at 0.99675 Transcribed locus ---  
1444408\_at 1.14527 RIKEN cDNA B130040O20 gene B130040O20Rik  
1444409\_at 0.80788 Kelch repeat and BTB (POZ) domain containing 8 Kbtbd8  
1444410\_at 0.88671 "acid phosphatase 6, lysophosphatidic" Acp6  
1444411\_at 1.24995 --- ---  
1444412\_at 1.03248 Absent in melanoma 1 Aim1  
1444413\_at 1.18381 "adaptor-related protein complex 3, sigma 2 subunit" Ap3s2  
1444414\_at 1.04766 Apolipoprotein D Apod

1444415\_at 1.02893 "SWI/SNF related, matrix associated, actin dependent regulator of chromatin, subfamily d, member 3" Smarcd3  
1444416\_at 1.29019 Centromere autoantigen A Cenpa  
1444417\_at 1.00074 RIKEN cDNA 9330101J02 gene /// similar to Protein C10orf93 /// similar to Protein C10orf93 9330101J02Rik /// LOC664857 /// LOC672120  
1444418\_at 0.86038 "Inositol 1,4,5-triphosphate receptor 2" Itpr2  
1444419\_at 1.04047 prolylcarboxypeptidase (angiotensinase C) Prcp  
1444420\_at 0.97007 RIKEN cDNA E230032D23 gene E230032D23Rik  
1444421\_at 0.87179 ethanol decreased 2 Etohd2  
1444422\_at 1.10063 protocadherin 19 Pcdh19  
1444423\_at 1.03934 Transcribed locus ---  
1444424\_at 1.12880 Ubiquitin-like 1 (sentrin) activating enzyme E1A Uble1a  
1444425\_at 0.84728 Zinc finger protein 53 Zfp53  
1444426\_at 1.13780 RIKEN cDNA F730031O20 gene F730031O20Rik  
1444427\_at 0.97103 RIKEN cDNA D930038D03 gene D930038D03Rik  
1444428\_at 0.93133 --- ---  
1444429\_at 0.85990 leucine-rich repeats and transmembrane domains 1 Lrtm1  
1444430\_at 1.37367 Armadillo repeat containing 8 Armc8  
1444431\_at 0.95767 RCSD domain containing 1 Rcsd1  
1444432\_at 0.93289 RIKEN cDNA D330040H18 gene D330040H18Rik  
1444433\_at 1.14312 AU RNA binding protein/enoyl-coenzyme A hydratase Auh  
1444434\_at 0.96302 WD repeat domain 33 Wdr33  
1444435\_at 0.93708 vacuolar protein sorting 13B (yeast) /// similar to vacuolar protein sorting 13B isoform 4 /// region containing RIKEN cDNA C330002D13 gene; RIKEN cDNA 2310042E16 gene; vacuolar protein sorting 13B (yeast) Vps13b /// LOC666173 /// LOC669978  
1444436\_at 0.88006 heat shock factor 2 /// RIKEN cDNA 9630030I15 gene Hsf2 /// 9630030I15Rik  
1444437\_at 0.99808 ubiquitin specific peptidase 34 Usp34  
1444438\_at 1.08657 calcium and integrin binding family member 3 Cib3  
1444439\_at 1.02117 Bri3 binding protein Bri3bp  
1444440\_at 0.86435 RIKEN cDNA 4121402D02 gene 4121402D02Rik  
1444441\_at 1.11925 "PREDICTED: Mus musculus hypothetical protein LOC629847 (LOC629847), mRNA" ---  
1444442\_at 0.85629 oral cancer overexpressed 1 Oraov1  
1444443\_at 0.87364 RIKEN cDNA A830039H10 gene A830039H10Rik  
1444444\_at 0.99053 "Adult male medulla oblongata cDNA, RIKEN full-length enriched library, clone:6330524O11 product:unclassifiable, full insert sequence" ---  
1444445\_at 1.46207 expressed sequence C77648 C77648  
1444446\_at 1.54960 --- ---  
1444447\_at 1.50283 NIMA (never in mitosis gene a)-related expressed kinase 7 Nek7  
1444448\_at 0.92780 RIKEN cDNA 1300007F04 gene 1300007F04Rik  
1444449\_at 1.12934 Ubiquitin specific peptidase 18 Usp18  
1444450\_at 1.03982 RIKEN cDNA 9530096D07 gene 9530096D07Rik

|              |         |                                                                                                                                 |          |               |
|--------------|---------|---------------------------------------------------------------------------------------------------------------------------------|----------|---------------|
| 1444451_at   | 0.89870 | pappalysin 2                                                                                                                    | Pappa2   |               |
| 1444452_at   | 1.07455 | RIKEN cDNA D930002L09                                                                                                           | gene     | D930002L09Rik |
| 1444453_at   | 0.95649 | Trp53 regulating kinase                                                                                                         | Trp53rk  |               |
| 1444454_at   | 1.02184 | Retinoblastoma 1                                                                                                                | Rb1      |               |
| 1444455_at   | 0.97445 | "calcium channel, voltage-dependent, P/Q type, alpha 1A subunit"                                                                |          | Cacna1a       |
| 1444456_at   | 1.20914 | RIKEN cDNA 9030425P06                                                                                                           | gene     | 9030425P06Rik |
| 1444457_at   | 1.02389 | ---                                                                                                                             | ---      |               |
| 1444458_at   | 1.39477 | Meningioma expressed antigen 6 (coiled-coil proline-rich)                                                                       |          | Mgea6         |
| 1444459_at   | 1.19240 | ---                                                                                                                             | ---      |               |
| 1444460_at   | 0.96674 | ubiquitin-conjugating enzyme E2R 2                                                                                              | Ube2r2   |               |
| 1444461_at   | 0.90901 | "Zinc finger, MYND domain containing 11"                                                                                        |          | Zmynd11       |
| 1444462_at   | 1.01233 | "0 day neonate thymus cDNA, RIKEN full-length enriched library, clone: A430098J12 product:unclassifiable, full insert sequence" | ---      |               |
| 1444463_at   | 1.03185 | Rho GTPase activating protein 12                                                                                                | Arhgap12 |               |
| 1444464_at   | 0.97825 | NADH dehydrogenase (ubiquinone) Fe-S protein 4                                                                                  | Ndufs4   |               |
| 1444465_at   | 1.12799 | "Ubiquitination factor E4B, UFD2 homolog (S. cerevisiae)"                                                                       |          | Ube4b         |
| 1444466_at   | 1.16966 | Neurocalcin delta                                                                                                               | Ncald    |               |
| 1444467_at   | 1.01210 | expressed sequence C77534                                                                                                       | C77534   |               |
| 1444468_at   | 0.85196 | progesterin and adipoQ receptor family member VIII                                                                              |          | Paqr8         |
| 1444469_at   | 0.90451 | RIKEN cDNA 1110059H15                                                                                                           | gene     | 1110059H15Rik |
| 1444470_x_at | 0.86663 | Bone morphogenetic protein 5                                                                                                    | Bmp5     |               |
| 1444471_at   | 0.91038 | RIKEN cDNA 4432416J03                                                                                                           | gene     | 4432416J03Rik |
| 1444472_at   | 1.24014 | SNF1-like kinase 2                                                                                                              | Snf1lk2  |               |
| 1444473_at   | 1.98550 | P300/CBP-associated factor                                                                                                      | Pcaf     |               |
| 1444474_at   | 0.95353 | RIKEN cDNA C630028L02                                                                                                           | gene     | C630028L02Rik |
| 1444475_at   | 0.96224 | ---                                                                                                                             | ---      |               |
| 1444476_at   | 1.03042 | RIKEN cDNA D030007L05                                                                                                           | gene     | D030007L05Rik |
| 1444477_at   | 1.02738 | Leucine rich repeat transmembrane neuronal 3                                                                                    |          | Lrrtm3        |
| 1444478_at   | 0.82957 | RIKEN cDNA 2900057D21                                                                                                           | gene     | 2900057D21Rik |
| 1444479_at   | 0.74907 | ---                                                                                                                             | ---      |               |
| 1444480_at   | 0.87843 | ---                                                                                                                             | ---      |               |
| 1444481_at   | 1.11900 | ---                                                                                                                             | ---      |               |
| 1444482_at   | 1.27655 | RIKEN cDNA A130078K24                                                                                                           | gene     | A130078K24Rik |
| 1444483_at   | 1.16065 | RIKEN cDNA 4931428D14                                                                                                           | gene     | 4931428D14Rik |
| 1444484_at   | 1.00880 | RIKEN cDNA A130009E19                                                                                                           | gene     | A130009E19Rik |
| 1444485_at   | 1.57703 | SHQ1 homolog (S. cerevisiae)                                                                                                    | Shq1     |               |
| 1444486_at   | 0.92763 | kelch-like 5 (Drosophila)                                                                                                       | Klh15    |               |
| 1444487_at   | 1.18750 | lecithin-retinol acyltransferase (phosphatidylcholine-retinol-O-acyltransferase)                                                | Lrat     |               |
| 1444488_at   | 0.86548 | Ca <sup>2+</sup> dependent activator protein for secretion                                                                      | Cadps    |               |
| 1444489_at   | 0.97730 | "Solute carrier family 25 (mitochondrial carrier, Aralar), member 12"                                                           |          | Slc25a12      |
| 1444490_at   | 1.33980 | ---                                                                                                                             | ---      |               |
| 1444491_at   | 0.93608 | "Transcribed locus, strongly similar to XP_344663.2 PREDICTED: neuregulin                                                       |          |               |

2 [Rattus norvegicus]" ---

1444492\_at 0.98206 "protein tyrosine phosphatase, receptor type, D" Ptprd  
1444493\_at 1.10602 "TBC1 domain family, member 2B" Tbc1d2b  
1444494\_at 0.99611 kelch repeat and BTB (POZ) domain containing 10 Kbtbd10  
1444495\_at 1.03262 --- ---  
1444496\_at 0.91374 RIKEN cDNA 2600011C06 gene 2600011C06Rik  
1444497\_at 1.06884 cDNA sequence BC059050 BC059050  
1444498\_at 1.10715 --- ---  
1444499\_at 0.95295 Transcribed locus ---  
1444500\_at 1.09229 "AHA1, activator of heat shock protein ATPase homolog 1 (yeast)" Ahsa1  
1444501\_at 1.31865 expressed sequence AI462521 AI462521  
1444502\_at 0.87606 PET112-like (yeast) Pet112l  
1444503\_at 1.18717 Glioblastoma amplified sequence Gbas  
1444504\_at 1.01882 dehydrogenase/reductase (SDR family) member 7C Dhrr7c  
1444505\_at 0.73590 retinoic acid induced 17 Rai17  
1444506\_at 1.54435 Translocating chain-associating membrane protein 1 Tram1  
1444507\_at 1.34085 ubiquitin specific peptidase 53 Usp53  
1444508\_s\_at 0.98130 arrestin domain containing 1 Arrdc1  
1444509\_at 1.15090 Transcribed locus ---  
1444510\_at 0.93946 Transcribed locus ---  
1444511\_at 0.96692 "solute carrier family 41, member 1" Slc41a1  
1444512\_at 0.85861 Rho GTPase activating protein 29 Arhgap29  
1444513\_at 0.94666 connector enhancer of kinase suppressor of Ras 2 Cnksr2  
1444514\_at 0.96507 RIKEN cDNA B930096F20 gene B930096F20Rik  
1444515\_at 1.76624 Myosin ID Myo1d  
1444516\_at 1.11871 "Protein tyrosine phosphatase, receptor-type, F interacting protein, binding protein 2" Ppfibp2  
1444517\_at 0.96924 --- ---  
1444518\_at 1.21085 "Acyl-Coenzyme A oxidase 1, palmitoyl" Acox1  
1444519\_at 0.86778 leucine rich repeat containing G protein coupled receptor 5 Lgr5  
1444520\_at 1.19882 furry homolog-like (Drosophila) Fryl  
1444521\_at 0.96544 Transcribed locus ---  
1444522\_at 0.89209 Transcribed locus ---  
1444523\_s\_at 1.01499 ubiquitin-conjugating enzyme E2 variant 1 /// similar to ubiquitin-conjugating enzyme E2 variant 1 /// similar to ubiquitin-conjugating enzyme E2 variant 1 Ube2v1 /// LOC545332 /// LOC666853  
1444524\_at 1.07205 "Activated spleen cDNA, RIKEN full-length enriched library, clone: F830206P12 product:hypothetical Cytochrome c heme-binding site containing protein, full insert sequence" ---  
1444525\_at 0.96381 "EGF, latrophilin seven transmembrane domain containing 1" Eltd1  
1444526\_at 0.83609 "signal sequence receptor, alpha" Ssr1  
1444527\_at 1.02426 Runt related transcription factor 1 Runx1  
1444528\_at 0.91445 --- ---

1444529\_at 0.91820 similar to X-linked eukaryotic translation initiation factor 1A LOC666806  
1444530\_at 1.48434 Transcribed locus ---  
1444531\_at 0.86578 "Superoxide dismutase 2, mitochondrial" Sod2  
1444532\_at 1.27377 --- ---  
1444533\_at 1.07641 "CUG triplet repeat, RNA binding protein 2" Cugbp2  
1444534\_at 0.94865 similar to CG3950-PA /// similar to CG3950-PA LOC666801 /// LOC669012  
1444535\_at 0.94329 "Adult male urinary bladder cDNA, RIKEN full-length enriched library, clone:9530001M05 product:unclassifiable, full insert sequence /// Osteoclast-like cell cDNA, RIKEN full-length enriched library, clone:I420017N03 product:unclassifiable, full insert sequence" ---  
1444536\_at 0.88339 expressed sequence AI462171 AI462171  
1444537\_at 0.90079 expressed sequence AI429363 AI429363  
1444538\_at 1.89582 Expressed sequence AL033314 AL033314  
1444539\_at 0.92209 RIKEN cDNA D530039A21 gene D530039A21Rik  
1444540\_at 1.06451 --- ---  
1444541\_at 1.46578 Myosin IXa Myo9a  
1444542\_at 0.90863 "Adult male aorta and vein cDNA, RIKEN full-length enriched library, clone:A530017F16 product:unclassifiable, full insert sequence" ---  
1444543\_at 1.01500 Transcribed locus ---  
1444544\_at 1.02113 "DNA primase, p49 subunit" Prim1  
1444545\_at 1.02233 Erythrocyte protein band 4.1 Epb4.1  
1444546\_at 1.04456 cDNA sequence BC027057 BC027057  
1444547\_at 1.03113 --- ---  
1444548\_at 1.04176 RIKEN cDNA 1600025M17 gene 1600025M17Rik  
1444549\_at 0.98499 "Adult male adrenal gland cDNA, RIKEN full-length enriched library, clone:7330409L06 product:unclassifiable, full insert sequence" ---  
1444550\_at 0.75842 RIKEN cDNA 1110021J02 gene 1110021J02Rik  
1444551\_at 1.15211 "Inositol 1,4,5-triphosphate receptor 2" Itpr2  
1444552\_at 1.40314 --- ---  
1444553\_at 0.97835 Postmeiotic segregation increased 1 (S. cerevisiae) Pms1  
1444554\_at 1.08673 Trinucleotide repeat containing 6b Tnrc6b  
1444555\_at 1.06031 Checkpoint suppressor 1 Ches1  
1444556\_at 1.14896 Schlafen 1 Slfn1  
1444557\_at 1.86361 SMT3 suppressor of mif two 3 homolog 1 (yeast) Sumo1  
1444558\_at 0.92134 WD repeat domain 33 Wdr33  
1444559\_at 0.89832 Putative homeodomain transcription factor 2 Phtf2  
1444560\_at 0.77909 Transcribed locus ---  
1444561\_at 1.06335 Transmembrane protein 39a Tmem39a  
1444562\_at 1.50194 Ubiquitin protein ligase E3C Ube3c  
1444563\_at 1.01834 "UDP-Gal:betaGlcNAc beta 1,4-galactosyltransferase, polypeptide 5" B4galt5  
1444564\_at 1.06495 apolipoprotein D Apod  
1444565\_at 1.01899 expressed sequence BB166591 BB166591  
1444566\_at 0.96612 "DnaJ (Hsp40) related, subfamily B, member 13" Dnajb13



1444567\_at 1.02604 RIKEN cDNA 1700066J03 gene 1700066J03Rik  
1444568\_at 0.96935 "Actin related protein 2/3 complex, subunit 5" Arpc5  
1444569\_at 1.12787 hypothetical protein LOC666752 /// hypothetical protein LOC669447 ///  
hypothetical protein LOC677552 LOC666752 /// LOC669447 /// LOC677552  
1444570\_at 1.17076 Craniofacial development protein 1 Cfdp1  
1444571\_at 0.94475 "Zinc finger, SWIM domain containing 3" Zswim3  
1444572\_at 0.95176 monocyte to macrophage differentiation-associated 2 Mmd2  
1444573\_at 0.99755 Lemur tyrosine kinase 3 Lmtk3  
1444574\_at 0.95156 E74-like factor 2 Elf2  
1444575\_at 1.21601 RIKEN cDNA 1500002O20 gene 1500002O20Rik  
1444576\_at 1.07745 Nuclear mitotic apparatus protein 1 Numa1  
1444577\_x\_at 1.31085 Nuclear mitotic apparatus protein 1 Numa1  
1444578\_at 1.12450 Speckle-type POZ protein Spop  
1444579\_at 1.04124 GATA zinc finger domain containing 2B Gatad2b  
1444580\_at 0.96854 Transcribed locus ---  
1444581\_at 0.93403 RAN GTPase activating protein 1 Rangap1  
1444582\_at 1.05350 "DCN1, defective in cullin neddylation 1, domain containing 5 (S. cerevisiae)"  
Dcun1d5  
1444583\_at 2.11756 "DNA segment, Chr 4, ERATO Doi 767, expressed" D4Ertd767e  
1444584\_at 1.02611 piggyBac transposable element derived 1 (Pgbd1) pseudogene /// RIKEN cDNA  
4921509E05 gene LOC238535 /// 4921509E05Rik  
1444585\_at 0.89826 arginine decarboxylase Adc  
1444586\_at 0.99332 Ras association (RalGDS/AF-6) and pleckstrin homology domains 1 Raph1  
1444587\_at 1.00971 expressed sequence AI481207 AI481207  
1444588\_at 1.08722 --- ---  
1444589\_at 1.01752 similar to reduced expression 2 LOC240038  
1444590\_at 0.99851 DDHD domain containing 2 Ddhd2  
1444591\_at 0.94338 "Phosphatidylinositol 3-kinase, regulatory subunit, polypeptide 1 (p85 alpha)"  
Pik3r1  
1444592\_at 1.04921 O-sialoglycoprotein endopeptidase Osgep  
1444593\_at 1.02593 PH domain and leucine rich repeat protein phosphatase-like Phlpp1  
1444594\_at 1.08659 T-box 3 Tbx3  
1444595\_at 0.99775 "zinc finger, X-linked, duplicated A /// similar to Zinc finger X-linked protein  
ZXDA" Zxda /// LOC668171  
1444596\_at 1.09106 paired box gene 7 Pax7  
1444597\_at 1.02389 Transcribed locus ---  
1444598\_at 1.30143 Ets variant gene 6 (TEL oncogene) Etv6  
1444599\_at 1.12483 --- ---  
1444600\_at 0.99764 nuclear receptor binding protein Nrpb  
1444601\_at 1.12681 --- ---  
1444602\_at 0.92975 "Transcribed locus, weakly similar to XP\_343428.2 PREDICTED: neural  
precursor cell expressed, developmentally down-regulated gene 4A [Rattus norvegicus]" ---  
1444603\_at 0.93535 RIKEN cDNA 2810030D12 gene 2810030D12Rik

1444604\_at 0.88348 Enhancer of zeste homolog 1 (Drosophila) Ezh1  
1444605\_at 0.95379 RIKEN cDNA 1700061F12 gene 1700061F12Rik  
1444606\_at 0.89233 ephrin A2 Efna2  
1444607\_at 0.82348 Corneodesmosin Cdsn  
1444608\_at 1.01832 Ankyrin repeat domain 17 Ankrd17  
1444609\_at 1.57652 Exocyst complex component 4 Exoc4  
1444610\_at 0.95622 Transcribed locus ---  
1444611\_at 0.98305 "U2 small nuclear ribonucleoprotein auxiliary factor (U2AF) 1, related sequence 2" U2af1-rs2  
1444612\_at 0.88741 RIKEN cDNA 3222402P14 gene 3222402P14Rik  
1444613\_at 1.07793 Transcribed locus ---  
1444614\_x\_at 0.94178 RIKEN cDNA 6430537H07 gene 6430537H07Rik  
1444615\_x\_at 1.02345 "runt-related transcription factor 1; translocated to, 1 (cyclin D-related)" Runx1t1  
1444616\_x\_at 1.06051 Transcribed locus ---  
1444617\_at 0.97325 Deleted in colorectal carcinoma Dcc  
1444618\_at 1.05857 RNA binding motif protein 5 Rbm5  
1444619\_x\_at 1.00070 "proteasome (prosome, macropain) subunit, beta type 8 (large multifunctional peptidase 7)" Psmb8  
1444620\_at 1.01439 Transcription factor 12 Tcf12  
1444621\_at 0.86743 IQ motif and Sec7 domain 2 Iqsec2  
1444622\_at 0.98033 "Protein tyrosine phosphatase, receptor type, D" Ptprd  
1444623\_at 1.01637 RIKEN cDNA E530011L22 gene E530011L22Rik  
1444624\_at 1.06824 ubiquitin-associated protein 1 Ubap1  
1444625\_at 1.10643 Hypothetical LOC545822 LOC545822  
1444626\_at 1.10581 hypothetical protein D930001B02 D930001B02  
1444627\_at 1.02068 "Purinergic receptor P2Y, G-protein coupled, 5" P2ry5  
1444628\_at 0.96017 a disintegrin and metallopeptidase domain 33 Adam33  
1444629\_at 0.94738 "amyotrophic lateral sclerosis 2 (juvenile) chromosome region, candidate 13 (human)" Als2cr13  
1444630\_at 0.94922 "DNA segment, Chr 2, ERATO Doi 127, expressed" D2Ertd127e  
1444631\_at 0.99205 Zinc finger protein 410 Zfp410  
1444632\_at 1.02151 cDNA sequence BC064078 BC064078  
1444633\_at 0.97424 --- ---  
1444634\_at 0.92443 NOL1/NOP2/Sun domain family 3 Nsun3  
1444635\_at 1.06623 Transcribed locus ---  
1444636\_at 0.98106 RIKEN cDNA 4930592I03 gene 4930592I03Rik  
1444637\_at 0.83558 --- ---  
1444638\_at 0.97782 titin Ttn  
1444639\_at 1.14794 Nephronophthisis 4 (juvenile) homolog (human) Nphp4  
1444640\_at 0.95122 "phosphatidylinositol glycan anchor biosynthesis, class G" Pigg  
1444641\_at 0.93070 Adenylate cyclase 3 Adcy3  
1444642\_at 0.96886 Transcribed locus ---

1444643\_at 1.00600 Transcribed locus ---  
1444644\_x\_at 1.13878 TatD DNase domain containing 1 Tatdn1  
1444645\_at 2.55292 SERTA domain containing 2 Sertad2  
1444646\_at 0.98499 RIKEN cDNA 8430420F16 gene 8430420F16Rik  
1444647\_at 1.15773 "phospholipase A2, activating protein" Plaa  
1444648\_at 0.93913 cDNA sequence BC050210 BC050210  
1444649\_at 1.07275 "Protein kinase C, epsilon" Prkce  
1444650\_at 1.33362 rho/rac guanine nucleotide exchange factor (GEF) 18 Arhgef18  
1444651\_at 1.52182 hypothetical LOC553089 LOC553089  
1444652\_at 0.91105 RIKEN cDNA B830004H01 gene B830004H01Rik  
1444653\_at 0.94813 "10 days neonate skin cDNA, RIKEN full-length enriched library,  
clone:4732412F15 product:unclassifiable, full insert sequence" ---  
1444654\_at 1.23134 Transcriptional regulating factor 1 Trefl  
1444655\_at 1.02232 --- ---  
1444656\_at 1.06976 cDNA sequence BC030499 BC030499  
1444657\_at 0.76147 Bcl3 binding protein B3bp  
1444658\_at 0.99959 --- ---  
1444659\_at 1.04503 Thyroid hormone receptor interactor 11 Trip11  
1444660\_at 1.45884 RIKEN cDNA 4932438A13 gene 4932438A13Rik  
1444661\_at 1.00541 G protein-coupled receptor 26 Gpr26  
1444662\_at 1.04243 "phospholipase A2, group IVC (cytosolic, calcium-independent)" Pla2g4c  
1444663\_at 1.40386 Vascular endothelial zinc finger 1 Vezf1  
1444664\_at 0.88050 "Immunoglobulin superfamily, member 4" Igsf4d  
1444665\_at 0.97477 RIKEN cDNA 4930402E16 gene 4930402E16Rik  
1444666\_at 1.05549 brix domain containing 1 Bxdc1  
1444667\_at 1.05093 "bromodomain, testis-specific" Brdt  
1444668\_at 1.02723 "Adult male testis cDNA, RIKEN full-length enriched library,  
clone:4930534N17 product:unclassifiable, full insert sequence" ---  
1444669\_at 0.97492 leucine rich repeat and fibronectin type III domain containing 1 Lrfn1  
1444670\_at 2.19602 RIKEN cDNA A130004G11 gene A130004G11Rik  
1444671\_at 0.92686 RAS protein activator like 2 Rasal2  
1444672\_at 0.90030 Transcribed locus ---  
1444673\_at 0.99229 RIKEN cDNA E030031F02 gene E030031F02Rik  
1444674\_at 1.08422 expressed sequence AU015680 AU015680  
1444675\_at 0.96060 expressed sequence AL023051 AL023051  
1444676\_at 1.21598 --- ---  
1444677\_at 1.96184 expressed sequence C77673 C77673  
1444678\_at 1.09453 --- ---  
1444679\_at 1.31919 PHD finger protein 21A Phf21a  
1444680\_at 0.93100 "Positive cofactor 2, multiprotein complex, glutamine/Q-rich-associated  
protein" Pcqap  
1444681\_at 0.86605 "DNA segment, Chr 14, ERATO Doi 171, expressed" D14Ertd171e  
1444682\_at 0.87916 cDNA Sequence BC037032 BC037032

1444683\_at 0.99755 --- ---  
1444684\_at 0.95518 RIKEN cDNA 8030475D13 gene 8030475D13Rik  
1444685\_at 0.87650 --- ---  
1444686\_at 0.93159 RIKEN cDNA A930016P21 gene A930016P21Rik  
1444687\_at 0.97547 "complement component 1, q subcomponent-like 2" C1ql2  
1444688\_at 1.10618 "positive cofactor 2, multiprotein complex, glutamine/Q-rich-associated protein" Pcqap  
1444689\_at 1.16695 WD repeat domain 67 Wdr67  
1444690\_at 0.82461 Eph receptor A5 Epha5  
1444691\_at 1.02616 "protein kinase C, nu" Prkc  
1444692\_at 0.97322 EST AI316844 AI316844  
1444693\_at 2.20405 "Calcium channel, voltage-dependent, beta 2 subunit" Cacnb2  
1444694\_at 1.39126 Tuftelin 1 Tuft1  
1444695\_at 1.02970 "Adult male colon cDNA, RIKEN full-length enriched library, clone:9030003C19 product:unclassifiable, full insert sequence" ---  
1444696\_at 0.92838 CDNA sequence BC059841 BC059841  
1444697\_at 1.12583 RIKEN cDNA 4732490B19 gene 4732490B19Rik  
1444698\_at 0.99708 Quaking Qk  
1444699\_at 1.14354 splicing factor 4 Sf4  
1444700\_at 0.88313 Neurexin III Nrxn3  
1444701\_at 1.64682 RIKEN cDNA A130001D14 gene A130001D14Rik  
1444702\_at 1.02652 "Adult male epididymis cDNA, RIKEN full-length enriched library, clone:9230116A06 product:unclassifiable, full insert sequence" ---  
1444703\_at 0.92319 RIKEN cDNA 2810403D21 gene 2810403D21Rik  
1444704\_at 0.92453 "7 days neonate cerebellum cDNA, RIKEN full-length enriched library, clone:A730050L22 product:unclassifiable, full insert sequence" ---  
1444705\_at 1.65599 Amyloid beta (A4) precursor protein App  
1444706\_at 1.10272 RIKEN cDNA E430014L09 gene E430014L09Rik  
1444707\_at 0.97950 Transcribed locus ---  
1444708\_at 0.98464 transmembrane protein 29 Tmem29  
1444709\_at 1.22965 inversin Invs  
1444710\_at 1.03061 "Adult male epididymis cDNA, RIKEN full-length enriched library, clone:9230020K05 product:unclassifiable, full insert sequence" ---  
1444711\_at 0.82799 ankyrin repeat domain 15 Ankrd15  
1444712\_at 1.05443 "gene model 739, (NCBI) /// hypothetical protein LOC672930" Gm739 /// LOC672930  
1444713\_at 1.11159 --- ---  
1444714\_at 1.01066 RIKEN cDNA 2510006D16 gene 2510006D16Rik  
1444715\_at 1.23018 Transcribed locus ---  
1444716\_at 1.76886 --- ---  
1444717\_at 1.10385 ZW10 interactor Zwint  
1444718\_at 1.08937 triggering receptor expressed on myeloid cells-like 2 Trem12  
1444719\_at 0.89467 "DNA Segment, Chr 7, Mouse Genome Informatics 29" D7Mgi29

|            |         |                                                                                                                                     |               |
|------------|---------|-------------------------------------------------------------------------------------------------------------------------------------|---------------|
| 1444720_at | 1.25608 | expressed sequence AA408456                                                                                                         | AA408456      |
| 1444721_at | 0.89479 | ---                                                                                                                                 | ---           |
| 1444722_at | 1.70662 | ---                                                                                                                                 | ---           |
| 1444723_at | 0.92152 | RIKEN cDNA 6530418L21 gene                                                                                                          | 6530418L21Rik |
| 1444724_at | 1.02069 | Protocadherin 9 Pcdh9                                                                                                               |               |
| 1444725_at | 0.95277 | microtubule associated serine/threonine kinase-like                                                                                 | Mastl         |
| 1444726_at | 0.89565 | "KRR1, small subunit (SSU) processome component, homolog (yeast)"                                                                   | Krr1          |
| 1444727_at | 0.90267 | ---                                                                                                                                 | ---           |
| 1444728_at | 2.81317 | Exocyst complex component 4                                                                                                         | Exoc4         |
| 1444729_at | 1.07760 | RIKEN cDNA E130317F20 gene                                                                                                          | E130317F20Rik |
| 1444730_at | 0.86548 | tousled-like kinase 1                                                                                                               | Tlk1          |
| 1444731_at | 1.03380 | "phosphodiesterase 4B, cAMP specific"                                                                                               | Pde4b         |
| 1444732_at | 1.03040 | ---                                                                                                                                 | ---           |
| 1444733_at | 1.02086 | Transcribed locus                                                                                                                   | ---           |
| 1444734_at | 0.92511 | RIKEN cDNA A330001L22 gene                                                                                                          | A330001L22Rik |
| 1444735_at | 1.21642 | ---                                                                                                                                 | ---           |
| 1444736_at | 1.09180 | "cadherin 7, type 2"                                                                                                                | Cdh7          |
| 1444737_at | 1.03015 | "DNA segment, Chr 2, Wayne State University 107, expressed"                                                                         | D2Wsu107e     |
| 1444738_at | 1.20726 | RIKEN cDNA 5730419I09 gene                                                                                                          | 5730419I09Rik |
| 1444739_at | 1.04916 | "Polymerase (DNA-directed), epsilon 4 (p12 subunit)"                                                                                | Pole4         |
| 1444740_at | 1.00526 | RIKEN cDNA 4930550L11 gene                                                                                                          | 4930550L11Rik |
| 1444741_at | 0.93374 | ---                                                                                                                                 | ---           |
| 1444742_at | 0.94790 | Ankyrin repeat and SOCS box-containing protein 14                                                                                   | Asb14         |
| 1444743_at | 1.02461 | "0 day neonate cerebellum cDNA, RIKEN full-length enriched library, clone: C230024F22 product:unclassifiable, full insert sequence" | ---           |
| 1444744_at | 0.97531 | Death inducer-obliterator 1                                                                                                         | Dido1         |
| 1444745_at | 1.00884 | Diaphanous homolog 2 (Drosophila)                                                                                                   | Diap2         |
| 1444746_at | 1.48165 | Polypyrimidine tract binding protein 2                                                                                              | Ptbp2         |
| 1444747_at | 1.13296 | Protein-L-isoaspartate (D-aspartate) O-methyltransferase domain containing 1                                                        | Pcmt1         |
| 1444748_at | 1.01958 | Paraspeckle protein 1                                                                                                               | Pspc1         |
| 1444749_at | 1.04763 | Apolipoprotein D                                                                                                                    | Apod          |
| 1444750_at | 1.40836 | Restin (Reed-Steinberg cell-expressed intermediate filament-associated protein)                                                     | Rsn           |
| 1444751_at | 0.96369 | "POU domain, class 6, transcription factor 1"                                                                                       | Pou6f1        |
| 1444752_at | 0.85672 | RIKEN cDNA C230073G13 gene                                                                                                          | C230073G13Rik |
| 1444753_at | 1.58350 | NIMA (never in mitosis gene a)-related expressed kinase 7                                                                           | Nek7          |
| 1444754_at | 1.00931 | additional sex combs like 2 (Drosophila)                                                                                            | Asxl2         |
| 1444755_at | 1.01441 | mitotic arrest deficient 1-like 1                                                                                                   | Mad111        |
| 1444756_at | 0.92481 | Transcribed locus                                                                                                                   | ---           |
| 1444757_at | 1.09668 | Eukaryotic translation elongation factor 1 epsilon 1                                                                                | Eef1e1        |
| 1444758_at | 1.25496 | Tnf receptor-associated factor 3                                                                                                    | Traf3         |
| 1444759_at | 0.91553 | prickle like 1 (Drosophila)                                                                                                         | Prickle1      |

|              |         |                                                                              |               |
|--------------|---------|------------------------------------------------------------------------------|---------------|
| 1444760_at   | 1.03552 | nuclear receptor co-repressor 1                                              | Ncor1         |
| 1444761_at   | 0.98807 | Coiled-coil domain containing 8                                              | Ccdc8         |
| 1444762_at   | 1.76525 | "Protein phosphatase 1, regulatory (inhibitor) subunit 12A"                  | Ppp1r12a      |
| 1444763_at   | 1.14962 | "protein tyrosine phosphatase, receptor type, K"                             | Ptprk         |
| 1444764_at   | 1.45680 | RIKEN cDNA A130022J21 gene                                                   | A130022J21Rik |
| 1444765_at   | 1.52073 | RNA binding protein gene with multiple splicing                              | Rbpms         |
| 1444766_at   | 1.14600 | ataxin 7-like 1                                                              | Atxn7l1       |
| 1444767_at   | 1.05769 | "GNAS (guanine nucleotide binding protein, alpha stimulating) complex locus" | Gnas          |
| 1444768_at   | 0.95656 | Transcribed locus                                                            | ---           |
| 1444769_at   | 1.06716 | Testis expressed gene 9                                                      | Tex9          |
| 1444770_at   | 1.04416 | RIKEN cDNA 1700095A13 gene                                                   | 1700095A13Rik |
| 1444771_at   | 1.03792 | ankyrin repeat and BTB (POZ) domain containing 2                             | Abtb2         |
| 1444772_at   | 1.07270 | SET and MYND domain containing 3                                             | Smyd3         |
| 1444773_at   | 1.01027 | RIKEN cDNA D430040D24 gene                                                   | D430040D24Rik |
| 1444774_at   | 1.02992 | de-etiolated homolog 1 (Arabidopsis)                                         | Det1          |
| 1444775_at   | 1.45447 | RIKEN cDNA 9930033D15 gene                                                   | 9930033D15Rik |
| 1444776_at   | 0.95356 | RIKEN cDNA 2700005E23 gene                                                   | 2700005E23Rik |
| 1444777_at   | 2.13902 | Retinoic acid induced 14                                                     | Rai14         |
| 1444778_at   | 0.98569 | septin 3                                                                     | 3-Sep         |
| 1444779_s_at | 0.95353 | zinc finger protein 59                                                       | Zfp59         |
| 1444780_at   | 0.96489 | RIKEN cDNA 5330421F07 gene                                                   | 5330421F07Rik |
| 1444781_at   | 0.95674 | XPA binding protein 1                                                        | Xab1          |
| 1444782_at   | 1.08533 | RIKEN cDNA 4930417H01 gene                                                   | 4930417H01Rik |
| 1444783_at   | 1.04618 | Abl-interactor 2                                                             | Abi2          |
| 1444784_at   | 0.85387 | RIKEN cDNA 4930564K09 gene                                                   | 4930564K09Rik |
| 1444785_at   | 1.93930 | Sloan-Kettering viral oncogene homolog                                       | Ski           |
| 1444786_at   | 0.95881 | nucleolar protein 3 (apoptosis repressor with CARD domain)                   | Nol3          |
| 1444787_at   | 1.24018 | Chromodomain helicase DNA binding protein 1                                  | Chd1          |
| 1444788_x_at | 1.03613 | Chromodomain helicase DNA binding protein 1                                  | Chd1          |
| 1444789_at   | 0.84870 | RIKEN cDNA 1700120C14 gene                                                   | 1700120C14Rik |
| 1444790_at   | 1.00357 | RIKEN cDNA 1810005K13 gene                                                   | 1810005K13Rik |
| 1444791_at   | 0.93151 | Purkinje cell protein 4-like 1                                               | Pcp4l1        |
| 1444792_at   | 0.98038 | ---                                                                          | ---           |
| 1444793_at   | 0.83414 | ---                                                                          | ---           |
| 1444794_at   | 1.03902 | ---                                                                          | ---           |
| 1444795_at   | 0.97280 | expressed sequence AU015723                                                  | AU015723      |
| 1444796_at   | 0.98530 | expressed sequence C76876                                                    | C76876        |
| 1444797_at   | 0.95621 | RIKEN cDNA 8030474K03 gene                                                   | 8030474K03Rik |
| 1444798_at   | 0.80126 | ---                                                                          | ---           |
| 1444799_at   | 1.12745 | expressed sequence AU022054                                                  | AU022054      |
| 1444800_at   | 1.04941 | Nuclear factor I/B                                                           | Nfib          |
| 1444801_at   | 0.96219 | RIKEN cDNA 2900041M22 gene                                                   | 2900041M22Rik |

|            |         |                                                                                |               |
|------------|---------|--------------------------------------------------------------------------------|---------------|
| 1444802_at | 1.04542 | SEC22 vesicle trafficking protein-like A ( <i>S. cerevisiae</i> )              | Sec22a        |
| 1444803_at | 1.13064 | "Zinc finger protein, multitype 2"                                             | Zfpm2         |
| 1444804_at | 1.02940 | "DNA segment, Chr 17, ERATO Doi 96, expressed"                                 | D17Ertd96e    |
| 1444805_at | 0.95029 | RIKEN cDNA 4930473A06 gene                                                     | 4930473A06Rik |
| 1444806_at | 1.74801 | RIKEN cDNA 6720456B07 gene                                                     | 6720456B07Rik |
| 1444807_at | 1.00948 | ---                                                                            | ---           |
| 1444808_at | 0.99352 | "PRKC, apoptosis, WT1, regulator"                                              | Pawr          |
| 1444809_at | 0.99690 | MARVEL (membrane-associating) domain containing 3                              | Marveld3      |
| 1444810_at | 2.43483 | Acetyl-Coenzyme A carboxylase alpha                                            | Acaca         |
| 1444811_at | 1.67817 | translocation protein 1                                                        | Tloc1         |
| 1444812_at | 0.87560 | PR domain containing 10                                                        | Prdm10        |
| 1444813_at | 1.07009 | Microtubule associated serine/threonine kinase 2                               | Mast2         |
| 1444814_at | 1.41692 | "DNA segment, Chr 15, ERATO Doi 180, expressed"                                | D15Ertd180e   |
| 1444815_at | 0.94603 | expressed sequence C85328                                                      | C85328        |
| 1444816_at | 0.96386 | ---                                                                            | ---           |
| 1444817_at | 1.13951 | "Pleckstrin homology domain containing, family H (with MyTH4 domain) member 2" | Plekhh2       |
| 1444818_at | 1.09665 | ---                                                                            | ---           |
| 1444819_at | 0.89945 | expressed sequence C86090                                                      | C86090        |
| 1444820_at | 0.95556 | Transmembrane protein 49                                                       | Tmem49        |
| 1444821_at | 0.88895 | "DNA segment, Chr 8, ERATO Doi 82, expressed"                                  | D8Ertd82e     |
| 1444822_at | 1.00506 | "Sarcoglycan, delta (dystrophin-associated glycoprotein)"                      | Sgcd          |
| 1444823_at | 1.03506 | ---                                                                            | ---           |
| 1444824_at | 1.12063 | expressed sequence C76793                                                      | C76793        |
| 1444825_at | 1.01098 | ---                                                                            | ---           |
| 1444826_at | 0.96668 | ---                                                                            | ---           |
| 1444827_at | 2.20500 | BTB (POZ) domain containing 9                                                  | Btbd9         |
| 1444828_at | 1.30615 | "Protein phosphatase 2, regulatory subunit B (B56), gamma isoform"             | Ppp2r5c       |
| 1444829_at | 0.86393 | expressed sequence C78532                                                      | C78532        |
| 1444830_at | 1.00146 | Transcribed locus                                                              | ---           |
| 1444831_at | 0.91786 | Serologically defined colon cancer antigen 8                                   | Sdccag8       |
| 1444832_at | 0.97538 | Huntingtin interacting protein 1 related                                       | Hip1r         |
| 1444833_at | 0.85962 | RIKEN cDNA 2410012H22 gene                                                     | 2410012H22Rik |
| 1444834_at | 0.96959 | "Protein phosphatase 1, regulatory (inhibitor) subunit 12A"                    | Ppp1r12a      |
| 1444835_at | 0.99850 | cDNA sequence BC030499                                                         | BC030499      |
| 1444836_at | 0.89299 | DEK oncogene (DNA binding)                                                     | Dek           |
| 1444837_at | 0.93222 | ---                                                                            | ---           |
| 1444838_at | 0.91278 | hypothetical protein C630010N09                                                | C630010N09    |
| 1444839_at | 1.00460 | ---                                                                            | ---           |
| 1444840_at | 0.99890 | ---                                                                            | ---           |
| 1444841_at | 1.01290 | ---                                                                            | ---           |
| 1444842_at | 0.97209 | "jumonji, AT rich interactive domain 1A (Rbp2 like)"                           | Jarid1a       |
| 1444843_at | 0.97993 | ---                                                                            | ---           |

|            |         |                                                                                                               |               |
|------------|---------|---------------------------------------------------------------------------------------------------------------|---------------|
| 1444844_at | 1.00777 | "fatty acid binding protein 3, muscle and heart"                                                              | Fabp3         |
| 1444845_at | 1.92274 | ---                                                                                                           | ---           |
| 1444846_at | 1.00492 | "DNA segment, Chr 15, ERATO Doi 529, expressed"                                                               | D15Ert529e    |
| 1444847_at | 0.84938 | ---                                                                                                           | ---           |
| 1444848_at | 1.13610 | R3H domain 1 (binds single-stranded nucleic acids)                                                            | R3hdm1        |
| 1444849_at | 0.94878 | expressed sequence C76872                                                                                     | C76872        |
| 1444850_at | 0.91456 | hepatitis A virus cellular receptor 1-like                                                                    | RP23-248K2.4  |
| 1444851_at | 1.00184 | Zinc finger protein 532                                                                                       | Zfp532        |
| 1444852_at | 0.93288 | Flavin containing monooxygenase 4                                                                             | Fmo4          |
| 1444853_at | 0.99894 | ---                                                                                                           | ---           |
| 1444854_at | 0.94699 | "PREDICTED: Mus musculus similar to gonadotropin inducible ovarian transcription factor 1 (LOC625996), mRNA"  | ---           |
| 1444855_at | 1.29705 | B-cell CLL/lymphoma 9-like                                                                                    | Bcl9l         |
| 1444856_at | 1.59140 | CREB binding protein                                                                                          | Crebbp        |
| 1444857_at | 1.02049 | expressed sequence C87312                                                                                     | C87312        |
| 1444858_at | 0.98090 | INO80 complex homolog 1 (S. cerevisiae)                                                                       | Inoc1         |
| 1444859_at | 0.92118 | ---                                                                                                           | ---           |
| 1444860_at | 0.84512 | "Laminin, alpha 3"                                                                                            | Lama3         |
| 1444861_at | 0.91256 | "DNA segment, Chr 13, ERATO Doi 297, expressed"                                                               | D13Ert297e    |
| 1444862_at | 0.91696 | RIKEN cDNA 1700112E06 gene                                                                                    | 1700112E06Rik |
| 1444863_at | 0.87549 | NHL repeat containing 2                                                                                       | Nhlrc2        |
| 1444864_at | 0.97058 | "DNA segment, Chr 12, ERATO Doi 125, expressed"                                                               | D12Ert125e    |
| 1444865_at | 0.94368 | ---                                                                                                           | ---           |
| 1444866_at | 0.95349 | RIKEN cDNA E230006M18 gene                                                                                    | E230006M18Rik |
| 1444867_at | 0.95796 | expressed sequence C76751                                                                                     | C76751        |
| 1444868_at | 1.04375 | RIKEN cDNA 4921529O18 gene                                                                                    | 4921529O18Rik |
| 1444869_at | 1.05116 | Gephyrin                                                                                                      | Gphn          |
| 1444870_at | 0.99537 | expressed sequence AU015438                                                                                   | AU015438      |
| 1444871_at | 0.99153 | expressed sequence AU022697                                                                                   | AU022697      |
| 1444872_at | 1.89835 | "DNA segment, Chr 3, ERATO Doi 740, expressed"                                                                | D3Ert740e     |
| 1444873_at | 1.01373 | Huntingtin interacting protein 1                                                                              | Hip1          |
| 1444874_at | 0.95542 | "ATP synthase, H <sup>+</sup> transporting, mitochondrial F0 complex, subunit c (subunit 9), isoform 1"       | Atp5g1        |
| 1444875_at | 1.17354 | "Protein phosphatase 2 (formerly 2A), catalytic subunit, alpha isoform"                                       | Ppp2ca        |
| 1444876_at | 0.96959 | RIKEN cDNA 2700049A03 gene                                                                                    | 2700049A03Rik |
| 1444877_at | 0.99920 | ---                                                                                                           | ---           |
| 1444878_at | 0.91880 | Dedicator of cytokinesis 10                                                                                   | Dock10        |
| 1444879_at | 0.95551 | "PREDICTED: Mus musculus similar to long interspersed repetitive DNA sequence LINE4 (L1Rn) (LOC621812), mRNA" | ---           |
| 1444880_at | 0.95519 | Transcribed locus                                                                                             | ---           |
| 1444881_at | 1.02411 | TAO kinase 3                                                                                                  | Taok3         |
| 1444882_at | 1.09887 | ---                                                                                                           | ---           |
| 1444883_at | 0.98192 | transmembrane protein 19                                                                                      | Tmem19        |



|            |         |                                                                                                               |                     |
|------------|---------|---------------------------------------------------------------------------------------------------------------|---------------------|
| 1444884_at | 1.02320 | palmitoyl-protein thioesterase 1                                                                              | Ppt1                |
| 1444885_at | 0.82874 | Transcribed locus                                                                                             | ---                 |
| 1444886_at | 1.28051 | Amyloid beta precursor protein (cytoplasmic tail) binding protein 2                                           | Appbp2              |
| 1444887_at | 0.94626 | expressed sequence C79015                                                                                     | C79015              |
| 1444888_at | 0.91404 | expressed sequence AU022852                                                                                   | AU022852            |
| 1444889_at | 0.96719 | Ras association (RalGDS/AF-6) domain family 2                                                                 | Rassf2              |
| 1444890_at | 1.62356 | Expressed sequence AA536749                                                                                   | AA536749            |
| 1444891_at | 0.94284 | ---                                                                                                           | ---                 |
| 1444892_at | 0.89402 | nucleoporin 160                                                                                               | Nup160              |
| 1444893_at | 1.05777 | ---                                                                                                           | ---                 |
| 1444894_at | 0.93853 | "Protein tyrosine phosphatase, non-receptor type 18"                                                          | Ptpn18              |
| 1444895_at | 0.85201 | Junction adhesion molecule 3                                                                                  | Jam3                |
| 1444896_at | 0.96045 | ---                                                                                                           | ---                 |
| 1444897_at | 1.03082 | expressed sequence AU017263                                                                                   | AU017263            |
| 1444898_at | 0.98339 | ---                                                                                                           | ---                 |
| 1444899_at | 1.03170 | RIKEN cDNA D630037F22 gene                                                                                    | D630037F22Rik       |
| 1444900_at | 1.00279 | "DNA segment, Chr 18, ERATO Doi 289, expressed"                                                               | D18Ertd289e         |
| 1444901_at | 0.90980 | ---                                                                                                           | ---                 |
| 1444902_at | 1.01575 | F-box and leucine-rich repeat protein 10                                                                      | Fbxl10              |
| 1444903_at | 1.03520 | Membrane-associated ring finger (C3HC4) 6                                                                     | 6-Mar               |
| 1444904_at | 0.94872 | "Runt-related transcription factor 1; translocated to, 1 (cyclin D-related)"                                  | Runx1t1             |
| 1444905_at | 0.99169 | "DNA segment, Chr 1, ERATO Doi 705, expressed"                                                                | D1Ertd705e          |
| 1444906_at | 0.90726 | latrophilin 2                                                                                                 | Lphn2               |
| 1444907_at | 1.07643 | expressed sequence AU022138                                                                                   | AU022138            |
| 1444908_at | 0.96203 | hyaluronic acid binding protein 4 /// similar to hyaluronic acid binding protein 4                            | Habp4 /// LOC671769 |
| 1444909_at | 1.09882 | Transcribed locus                                                                                             | ---                 |
| 1444910_at | 1.01097 | ---                                                                                                           | ---                 |
| 1444911_at | 1.01812 | RIKEN cDNA 9030605H24 gene                                                                                    | 9030605H24Rik       |
| 1444912_at | 1.00764 | ---                                                                                                           | ---                 |
| 1444913_at | 1.14442 | Hedgehog acyltransferase                                                                                      | Hhat                |
| 1444914_at | 1.00137 | ---                                                                                                           | ---                 |
| 1444915_at | 0.99991 | "DNA segment, Chr 1, ERATO Doi 399, expressed"                                                                | D1Ertd399e          |
| 1444916_at | 1.18417 | "PREDICTED: Mus musculus similar to Kinesin-Like Protein family member (klp-6) (LOC383592), mRNA"             | ---                 |
| 1444917_at | 1.01331 | Ubiquitin-conjugating enzyme E2W (putative)                                                                   | Ube2w               |
| 1444918_at | 0.94462 | ---                                                                                                           | ---                 |
| 1444919_at | 1.07749 | ---                                                                                                           | ---                 |
| 1444920_at | 1.05057 | "DNA segment, Chr 19, ERATO Doi 386, expressed"                                                               | D19Ertd386e         |
| 1444921_at | 0.99279 | "DNA segment, Chr 15, ERATO Doi 466, expressed"                                                               | D15Ertd466e         |
| 1444922_at | 0.96272 | "PREDICTED: Mus musculus similar to microtubule-associated protein, RP/EB family, member 3 (LOC620153), mRNA" | ---                 |

1444923\_at 0.91056 "Adult male diencephalon cDNA, RIKEN full-length enriched library, clone:9330152C01 product:unclassifiable, full insert sequence" ---  
1444924\_at 0.93829 --- ---  
1444925\_at 0.89799 --- ---  
1444926\_at 0.93422 --- ---  
1444927\_at 1.00145 "DNA segment, Chr 11, ERATO Doi 729, expressed" D11Ertd729e  
1444928\_at 1.03502 "Solute carrier family 35, member F1" Slc35f1  
1444929\_at 1.03242 --- ---  
1444930\_at 1.00139 "Rabaptin, RAB GTPase binding effector protein 1" Rabep1  
1444931\_at 1.05357 Endothelial-specific receptor tyrosine kinase Tek  
1444932\_at 0.92669 --- ---  
1444933\_at 0.90425 "Transcribed locus, moderately similar to XP\_231006.3 PREDICTED: similar to formin [Rattus norvegicus]" ---  
1444934\_at 1.18694 zinc finger protein (C2H2 type) 276 Zfp276  
1444935\_at 0.82759 --- ---  
1444936\_at 0.97877 "DNA segment, Chr 5, ERATO Doi 566, expressed" D5Ertd566e  
1444937\_at 1.02381 "AF4/FMR2 family, member 1" Aff1  
1444938\_at 0.78935 Transcribed locus ---  
1444939\_at 1.00521 --- ---  
1444940\_at 0.92762 expressed sequence C76411 C76411  
1444941\_at 0.97684 --- ---  
1444942\_at 0.94873 helicase with zinc finger domain Helz  
1444943\_at 1.38213 SH3 domain containing ring finger 1 Sh3rf1  
1444944\_at 0.89091 --- ---  
1444945\_at 0.91846 expressed sequence AU024605 AU024605  
1444946\_at 1.07051 Transcribed locus ---  
1444947\_at 1.09788 LIM and SH3 protein 1 Lasp1  
1444948\_at 1.05304 --- ---  
1444949\_at 0.97994 --- ---  
1444950\_at 1.03211 zinc finger protein 509 Zfp509  
1444951\_at 0.90881 RIKEN cDNA 4930467M19 gene 4930467M19Rik  
1444952\_a\_at 1.13351 nuclear casein kinase and cyclin-dependent kinase substrate 1 Nucks1  
1444953\_at 1.00997 Nuclear casein kinase and cyclin-dependent kinase substrate 1 Nucks1  
1444954\_at 1.04235 Cyclin-dependent kinase-like 4 Cdk14  
1444955\_at 0.88024 "DNA segment, Chr 6, ERATO Doi 469, expressed" D6Ertd469e  
1444956\_at 0.98262 Gamma-aminobutyric acid (GABA-A) receptor-associated protein-like 2 Gabarapl2  
1444957\_at 1.01603 Paraspeckle protein 1 Pspc1  
1444958\_at 1.12132 expressed sequence C79017 C79017  
1444959\_at 1.07158 "DNA segment, Chr 1, ERATO Doi 83, expressed" D1Ertd83e  
1444960\_at 1.05097 "cytochrome P450, family 2, subfamily u, polypeptide 1" Cyp2u1  
1444961\_at 0.93873 --- ---  
1444962\_at 1.07891 similar to component of Sp100-rs LOC665317

|                                |         |                                                                                      |                                                      |                                                                |
|--------------------------------|---------|--------------------------------------------------------------------------------------|------------------------------------------------------|----------------------------------------------------------------|
| 1444963_at                     | 1.06908 | ---                                                                                  | ---                                                  |                                                                |
| 1444964_at                     | 0.99894 | "casein kinase 1, gamma 1"                                                           | Csnk1g1                                              |                                                                |
| 1444965_at                     | 0.95168 | RIKEN cDNA E130002L11 gene                                                           | E130002L11Rik                                        |                                                                |
| 1444966_at                     | 0.94746 | "Ribonucleoprotein, PTB-binding 1"                                                   | Raver1                                               |                                                                |
| 1444967_at                     | 1.08414 | Dystroglycan 1                                                                       | Dag1                                                 |                                                                |
| 1444968_at                     | 0.96900 | ---                                                                                  | ---                                                  |                                                                |
| 1444969_at                     | 1.09135 | RIKEN cDNA 5033414K04 gene                                                           | 5033414K04Rik                                        |                                                                |
| 1444970_at                     | 0.91699 | expressed sequence C79870                                                            | C79870                                               |                                                                |
| 1444971_at                     | 1.10758 | RNA binding motif protein 5                                                          | Rbm5                                                 |                                                                |
| 1444972_at                     | 1.10912 | expressed sequence C77626                                                            | C77626                                               |                                                                |
| 1444973_at                     | 0.99408 | "Potassium large conductance calcium-activated channel, subfamily M, alpha member 1" | Kcnma1                                               |                                                                |
| 1444974_at                     | 0.92119 | expressed sequence AU023617                                                          | AU023617                                             |                                                                |
| 1444975_at                     | 0.76097 | Coiled-coil-helix-coiled-coil-helix domain containing 6                              | Chchd6                                               |                                                                |
| 1444976_at                     | 1.01243 | ---                                                                                  | ---                                                  |                                                                |
| 1444977_at                     | 1.00366 | ---                                                                                  | ---                                                  |                                                                |
| 1444978_at                     | 0.92675 | ---                                                                                  | ---                                                  |                                                                |
| 1444979_at                     | 1.06482 | protein C                                                                            | Proc                                                 |                                                                |
| 1444980_at                     | 1.09778 | Hypothetical protein C730009D12                                                      | C730009D12                                           |                                                                |
| 1444981_at                     | 0.90717 | Putative neuronal cell adhesion molecule                                             | Punc                                                 |                                                                |
| 1444982_at                     | 0.84805 | "Ras homolog gene family, member J"                                                  | Rhoj                                                 |                                                                |
| 1444983_at                     | 0.86506 | RIKEN cDNA 4933437K13 gene                                                           | 4933437K13Rik                                        |                                                                |
| 1444984_at                     | 0.83636 | expressed sequence C77649                                                            | C77649                                               |                                                                |
| 1444985_at                     | 1.04128 | "Solute carrier family 8 (sodium/calcium exchanger), member 1"                       | Slc8a1                                               |                                                                |
| 1444986_at                     | 0.95252 | ---                                                                                  | ---                                                  |                                                                |
| 1444987_at                     | 1.12296 | Cathepsin B                                                                          | Ctsb                                                 |                                                                |
| 1444988_at                     | 1.01992 | ---                                                                                  | ---                                                  |                                                                |
| 1444989_at                     | 1.02632 | hypothetical protein LOC665914                                                       | /// hypothetical protein LOC671445                   | ///                                                            |
| hypothetical protein LOC677108 |         | LOC665914                                                                            | /// LOC671445                                        | /// LOC677108                                                  |
| 1444990_at                     | 1.00558 | Human immunodeficiency virus type I enhancer binding protein 2                       | Hivep2                                               |                                                                |
| 1444991_at                     | 0.89410 | ---                                                                                  | ---                                                  |                                                                |
| 1444992_at                     | 1.25091 | expressed sequence AI120166                                                          | AI120166                                             |                                                                |
| 1444993_at                     | 0.98379 | similar to mortality factor 4 like 1 (predicted)                                     | /// similar to mortality factor 4 like 1 (predicted) | /// similar to mortality factor 4 like 1 (predicted) LOC664949 |
| LOC675080                      |         | /// LOC671072                                                                        | ///                                                  |                                                                |
| 1444994_at                     | 0.97886 | RIKEN cDNA A230038B01 gene                                                           | A230038B01Rik                                        |                                                                |
| 1444995_at                     | 0.85318 | "Chromodomain protein, Y chromosome-like 2"                                          | Cdyl2                                                |                                                                |
| 1444996_at                     | 1.13046 | DEP domain containing 5                                                              | Depdc5                                               |                                                                |
| 1444997_at                     | 0.96923 | "PR domain containing 1, with ZNF domain"                                            | Prdm1                                                |                                                                |
| 1444998_at                     | 0.81735 | Transcribed locus                                                                    | ---                                                  |                                                                |
| 1444999_at                     | 0.98347 | expressed sequence C77651                                                            | C77651                                               |                                                                |
| 1445000_at                     | 0.99047 | ---                                                                                  | ---                                                  |                                                                |
| 1445001_at                     | 1.13278 | ---                                                                                  | ---                                                  |                                                                |

|              |         |                                                                                                                                                                     |               |  |
|--------------|---------|---------------------------------------------------------------------------------------------------------------------------------------------------------------------|---------------|--|
| 1445002_at   | 0.92904 | ---                                                                                                                                                                 | ---           |  |
| 1445003_at   | 1.07713 | "phenylalanine-tRNA synthetase-like, alpha subunit"                                                                                                                 | Farsla        |  |
| 1445004_a_at | 0.87589 | RIKEN cDNA A330068P14 gene                                                                                                                                          | A330068P14Rik |  |
| 1445005_at   | 0.92437 | expressed sequence C79491                                                                                                                                           | C79491        |  |
| 1445006_at   | 1.02784 | ---                                                                                                                                                                 | ---           |  |
| 1445007_at   | 1.02093 | Leucine rich repeat containing 50                                                                                                                                   | Lrrc50        |  |
| 1445008_at   | 1.90574 | Fibronectin type III domain containing 3B                                                                                                                           | Fndc3b        |  |
| 1445009_at   | 1.12171 | "Solute carrier family 9 (sodium/hydrogen exchanger), member 8"                                                                                                     | Slc9a8        |  |
| 1445010_at   | 0.95031 | Transcribed locus                                                                                                                                                   | ---           |  |
| 1445011_at   | 0.96428 | ---                                                                                                                                                                 | ---           |  |
| 1445012_at   | 0.96807 | NIMA (never in mitosis gene a)-related expressed kinase 11                                                                                                          | Nek11         |  |
| 1445013_at   | 1.01924 | expressed sequence C86098                                                                                                                                           | C86098        |  |
| 1445014_at   | 0.98467 | expressed sequence AU019157                                                                                                                                         | AU019157      |  |
| 1445015_at   | 0.99452 | ---                                                                                                                                                                 | ---           |  |
| 1445016_at   | 0.91292 | ---                                                                                                                                                                 | ---           |  |
| 1445017_at   | 1.02882 | "CCR4-NOT transcription complex, subunit 2"                                                                                                                         | Cnot2         |  |
| 1445018_at   | 0.99648 | Protein serine kinase H1                                                                                                                                            | Pskh1         |  |
| 1445019_at   | 1.03066 | ---                                                                                                                                                                 | ---           |  |
| 1445020_at   | 0.90403 | ---                                                                                                                                                                 | ---           |  |
| 1445021_at   | 0.95796 | RIKEN cDNA 6030465E24 gene                                                                                                                                          | 6030465E24Rik |  |
| 1445022_at   | 1.07364 | Transcribed locus                                                                                                                                                   | ---           |  |
| 1445023_at   | 0.89828 | Transcribed locus                                                                                                                                                   | ---           |  |
| 1445024_at   | 1.03458 | START domain containing 7                                                                                                                                           | Stard7        |  |
| 1445025_at   | 1.05376 | expressed sequence AU015536                                                                                                                                         | AU015536      |  |
| 1445026_at   | 0.98254 | Activin receptor IIA                                                                                                                                                | Acvr2a        |  |
| 1445027_at   | 1.02826 | cerebellar degeneration-related protein 2-like                                                                                                                      | Cdr2l         |  |
| 1445028_at   | 1.07819 | "Protein kinase C, alpha"                                                                                                                                           | Prkca         |  |
| 1445029_at   | 1.08506 | RIKEN cDNA A330019N05 gene                                                                                                                                          | A330019N05Rik |  |
| 1445030_at   | 1.04276 | "PREDICTED: Mus musculus similar to Glyceraldehyde-3-phosphate dehydrogenase (GAPDH) (38 kDa BFA-dependent ADP-ribosylation substrate) (BARS-38) (LOC623178), mRNA" | ---           |  |
| 1445031_at   | 1.08825 | "TBC1 domain family, member 8"                                                                                                                                      | Tbc1d8        |  |
| 1445032_at   | 1.05961 | Death associated protein kinase 1                                                                                                                                   | Dapk1         |  |
| 1445033_at   | 1.02209 | "ATP-binding cassette, sub-family A (ABC1), member 16"                                                                                                              | Abca16        |  |
| 1445034_at   | 0.98503 | "Coronin, actin binding protein 2A"                                                                                                                                 | Coro2a        |  |
| 1445035_at   | 1.01980 | immunoglobulin kappa chain complex variable region                                                                                                                  | Igk-V         |  |
| 1445036_at   | 1.04893 | "DNA segment, Chr 11, ERATO Doi 518, expressed"                                                                                                                     | D11Ertd518e   |  |
| 1445037_at   | 1.84121 | RIKEN cDNA 6430510B20 gene                                                                                                                                          | 6430510B20Rik |  |
| 1445038_at   | 0.86590 | ---                                                                                                                                                                 | ---           |  |
| 1445039_at   | 0.90435 | ---                                                                                                                                                                 | ---           |  |
| 1445040_at   | 0.87814 | "DNA segment, Chr 7, ERATO Doi 783, expressed"                                                                                                                      | D7Ertd783e    |  |
| 1445041_at   | 1.00981 | "DNA segment, Chr 16, ERATO Doi 6, expressed"                                                                                                                       | D16Ertd6e     |  |
| 1445042_at   | 0.90380 | Amino adipate-semialdehyde synthase                                                                                                                                 | Aass          |  |

1445043\_at 0.99396 --- ---  
1445044\_at 1.04626 Prostaglandin I2 (prostacyclin) synthase Ptgis  
1445045\_at 0.94991 Mastermind like 1 (Drosophila) Maml1  
1445046\_at 1.06734 "DNA segment, Chr 8, ERATO Doi 317, expressed" D8Ertd317e  
1445047\_at 0.95052 expressed sequence C79246 C79246  
1445048\_at 1.10729 "bromodomain adjacent to zinc finger domain, 2B" Baz2b  
1445049\_at 0.94253 expressed sequence C80893 C80893  
1445050\_at 0.92661 expressed sequence AU015247 AU015247  
1445051\_at 1.01271 --- ---  
1445052\_at 1.07717 Protocadherin 9 Pcdh9  
1445053\_at 1.00069 expressed sequence AU022537 AU022537  
1445054\_at 0.95168 Forkhead box N2 Foxn2  
1445055\_at 0.93763 "Adult male hypothalamus cDNA, RIKEN full-length enriched library, clone:  
A230013J07 product:unclassifiable, full insert sequence" ---  
1445056\_at 1.01728 RIKEN cDNA 9230102K24 gene 9230102K24Rik  
1445057\_at 1.05887 expressed sequence C81285 C81285  
1445058\_at 1.09187 Fraser syndrome 1 homolog (human) Fras1  
1445059\_at 1.01850 expressed sequence C80435 C80435  
1445060\_at 0.91131 "DNA segment, Chr 5, ERATO Doi 470, expressed" D5Ertd470e  
1445061\_at 1.02630 Protocadherin 9 Pcdh9  
1445062\_at 1.79659 "ELOVL family member 6, elongation of long chain fatty acids (yeast)" Elov16  
1445063\_at 0.95060 "DNA segment, Chr 1, ERATO Doi 228, expressed" D1Ertd228e  
1445064\_at 0.84096 developmentally regulated repeat element-containing transcript 1 Drr1  
1445065\_at 0.85379 "Atpase, class VI, type 11C" Atp11c  
1445066\_at 0.91857 Tetratricopeptide repeat domain 7B Ttc7b  
1445067\_at 1.07772 ADP-ribosylation factor GTPase activating protein 1 Arfgap1  
1445068\_at 1.15360 mucosa associated lymphoid tissue lymphoma translocation gene 1 Malt1  
1445069\_at 1.02996 --- ---  
1445070\_at 0.86328 Transcribed locus ---  
1445071\_at 0.93797 --- ---  
1445072\_at 1.05268 --- ---  
1445073\_at 0.98137 --- ---  
1445074\_at 1.09071 "16 days neonate heart cDNA, RIKEN full-length enriched library, clone:  
D830036I24 product:weakly similar to CYTOCHROME C OXIDASE POLYPEPTIDE VA,  
MITOCHONDRIAL PRECURSOR (EC 1.9.3.1) [Rattus norvegicus], full insert sequence" ---  
1445075\_at 1.06435 --- ---  
1445076\_at 0.95493 --- ---  
1445077\_at 0.85880 --- ---  
1445078\_at 1.07870 "DNA segment, Chr 7, ERATO Doi 526, expressed" D7Ertd526e  
1445079\_at 0.99723 "DNA segment, Chr 15, ERATO Doi 320, expressed" D15Ertd320e  
1445080\_at 1.27876 "WW, C2 and coiled-coil domain containing 1" Wwc1  
1445081\_at 0.89332 RIKEN cDNA A930041I02 gene A930041I02Rik  
1445082\_at 1.18397 Kinesin family member 16B Kif16b

|            |         |                                                                          |               |
|------------|---------|--------------------------------------------------------------------------|---------------|
| 1445083_at | 1.08770 | Transcribed locus                                                        | ---           |
| 1445084_at | 0.95874 | ---                                                                      | ---           |
| 1445085_at | 0.98639 | Calsyntenin 1                                                            | Clstn1        |
| 1445086_at | 1.02768 | "Cytochrome P450, family 2, subfamily j, polypeptide 5"                  | Cyp2j5        |
| 1445087_at | 1.07539 | ---                                                                      | ---           |
| 1445088_at | 1.09272 | "Membrane associated guanylate kinase, WW and PDZ domain containing 1"   | Magi1         |
| 1445089_at | 0.95550 | "DNA segment, Chr 16, ERATO Doi 778, expressed"                          | D16Ertd778e   |
| 1445090_at | 0.98969 | "Glutamate receptor, ionotropic, kainate 2 (beta 2)"                     | Grik2         |
| 1445091_at | 1.56975 | ataxia telangiectasia and Rad3 related                                   | Atr           |
| 1445092_at | 0.98184 | ---                                                                      | ---           |
| 1445093_at | 1.07131 | Transcription factor 12                                                  | Tcf12         |
| 1445094_at | 0.99595 | ---                                                                      | ---           |
| 1445095_at | 0.97621 | Interleukin 31 receptor A                                                | Il31ra        |
| 1445096_at | 0.94900 | Coiled-coil domain containing 51                                         | Ccdc51        |
| 1445097_at | 1.02334 | "Phosphatidylinositol 3 kinase, regulatory subunit, polypeptide 3 (p55)" | Pik3r3        |
| 1445098_at | 0.89392 | expressed sequence AU022706                                              | AU022706      |
| 1445099_at | 0.93397 | Transcribed locus                                                        | ---           |
| 1445100_at | 0.98763 | ---                                                                      | ---           |
| 1445101_at | 1.13150 | ---                                                                      | ---           |
| 1445102_at | 1.05978 | RIKEN cDNA B930096M23 gene                                               | B930096M23Rik |
| 1445103_at | 0.99641 | Transmembrane protein 23                                                 | Tmem23        |
| 1445104_at | 1.04471 | RIKEN cDNA E230029C05 gene                                               | E230029C05Rik |
| 1445105_at | 1.20438 | P300/CBP-associated factor                                               | Pcaf          |
| 1445106_at | 1.25279 | Muscleblind-like 1 (Drosophila)                                          | Mbnl1         |
| 1445107_at | 1.03546 | RIKEN cDNA A530064N14 gene                                               | A530064N14Rik |
| 1445108_at | 0.97165 | Latrophilin 3                                                            | Lphn3         |
| 1445109_at | 1.01827 | WD repeat domain 4                                                       | Wdr4          |
| 1445110_at | 0.96150 | "KH domain containing, RNA binding, signal transduction associated 2"    | Khdrbs2       |
| 1445111_at | 1.76603 | Exocyst complex component 4                                              | Exoc4         |
| 1445112_at | 1.01216 | Adenylate cyclase 1                                                      | Adcy1         |
| 1445113_at | 1.13287 | ---                                                                      | ---           |
| 1445114_at | 0.97501 | "Catenin (cadherin associated protein), delta 2"                         | Ctnnd2        |
| 1445115_at | 0.97226 | RIKEN cDNA D130067I03 gene                                               | D130067I03Rik |
| 1445116_at | 0.94540 | Ubiquitin specific peptidase 25                                          | Usp25         |
| 1445117_at | 0.96528 | Glycosyltransferase 28 domain containing 1                               | Glt28d1       |
| 1445118_at | 1.04096 | ---                                                                      | ---           |
| 1445119_at | 1.04670 | "DNA segment, Chr 7, ERATO Doi 661, expressed"                           | D7Ertd661e    |
| 1445120_at | 0.99050 | expressed sequence AU021977                                              | AU021977      |
| 1445121_at | 1.02608 | RIKEN cDNA 1110007J02 gene                                               | 1110007J02Rik |
| 1445122_at | 1.12469 | RIKEN cDNA A830082N09 gene                                               | A830082N09Rik |

1445123\_at 0.93083 "PREDICTED: Mus musculus similar to ubiquitin A-52 residue ribosomal protein fusion product 1 (LOC629750), mRNA" ---  
1445124\_at 1.04751 RIKEN cDNA A930009L07 gene A930009L07Rik  
1445125\_at 0.95269 "DNA segment, Chr 8, ERATO Doi 107, expressed" D8Ertd107e  
1445126\_at 1.03986 LIM domain binding 2 Ldb2  
1445127\_at 0.90275 collagen and calcium binding EGF domains 1 Ccbe1  
1445128\_at 0.98355 CDNA clone IMAGE:30463708 ---  
1445129\_at 1.08371 --- ---  
1445130\_at 1.06825 expressed sequence AA407111 AA407111  
1445131\_at 0.97305 F-box and leucine-rich repeat protein 13 Fbxl13  
1445132\_at 1.06104 Arginyl aminopeptidase (aminopeptidase B) Rnpep  
1445133\_at 1.04170 Transcription factor 12 Tcf12  
1445134\_at 0.97221 MKL/myocardin-like 2 Mkl2  
1445135\_at 1.06893 --- ---  
1445136\_at 1.03241 --- ---  
1445137\_at 2.26036 PTK2 protein tyrosine kinase 2 Ptk2  
1445138\_at 0.93604 RIKEN cDNA A530083I20 gene A530083I20Rik  
1445139\_at 0.96522 Expressed sequence AV312086 AV312086  
1445140\_at 1.05987 expressed sequence AU022804 AU022804  
1445141\_at 1.15824 inhibitor of kappaB kinase beta Ikbkb  
1445142\_at 0.96665 "Adaptor-related protein complex 2, beta 1 subunit" Ap2b1  
1445143\_at 1.05821 vasohibin 1 Vash1  
1445144\_at 1.00804 "Syntrophin, basic 1" Sntb1  
1445145\_at 0.94890 Stromal antigen 1 Stag1  
1445146\_at 1.07713 RIKEN cDNA B230219N05 gene B230219N05Rik  
1445147\_at 0.92948 "proteasome (prosome, macropain) activator subunit 4" Psme4  
1445148\_at 0.98322 Phospholipase C-like 1 Plcl1  
1445149\_at 1.03696 Poliovirus receptor Pvr  
1445150\_at 1.00120 cDNA sequence BC023744 BC023744  
1445151\_at 1.16063 --- ---  
1445152\_at 1.03562 Calcium/calmodulin-dependent serine protein kinase (MAGUK family) Cask  
1445153\_at 1.13397 V-abl Abelson murine leukemia oncogene 1 Abl1  
1445154\_at 0.84573 RIKEN cDNA 3300002I08 gene 3300002I08Rik  
1445155\_at 0.99213 Transcribed locus ---  
1445156\_at 1.08046 expressed sequence C81001 C81001  
1445157\_at 1.08589 --- ---  
1445158\_at 0.94093 synaptophysin-like protein Sypl  
1445159\_at 1.03984 Transcribed locus ---  
1445160\_at 1.06238 RIKEN cDNA 9630020C08 gene /// region containing RIKEN cDNA 9630020C08 gene; neuron navigator 3 9630020C08Rik /// LOC676640  
1445161\_at 1.24313 --- ---  
1445162\_at 1.02363 Transcribed locus ---  
1445163\_at 1.02532 --- ---

1445164\_at 1.06775 RIKEN cDNA 2210418O10 gene 2210418O10Rik  
1445165\_at 0.95259 RIKEN cDNA 1200003I07 gene 1200003I07Rik  
1445166\_at 0.98414 Polycomb group ring finger 3 Pcgf3  
1445167\_at 0.99403 RIKEN cDNA 9630001P10 gene 9630001P10Rik  
1445168\_at 1.05665 --- ---  
1445169\_at 1.27662 --- ---  
1445170\_at 0.97925 RIKEN cDNA 2700012I20 gene 2700012I20Rik  
1445171\_at 1.01280 RIKEN cDNA 1700067C01 gene /// RIKEN cDNA A230107C01 gene  
1700067C01Rik /// A230107C01Rik  
1445172\_at 1.02978 ligatin Lgtn  
1445173\_at 0.90817 cDNA sequence AK129341 AK129341  
1445174\_at 1.06227 --- ---  
1445175\_at 0.84969 "Adult male aorta and vein cDNA, RIKEN full-length enriched library, clone:  
A530052F04 product:unclassifiable, full insert sequence" ---  
1445176\_at 0.97014 --- ---  
1445177\_at 1.02026 "4 days neonate male adipose cDNA, RIKEN full-length enriched library, clone:  
B430206K05 product:unclassifiable, full insert sequence" ---  
1445178\_at 2.22360 SH3 domain containing ring finger 1 Sh3rf1  
1445179\_at 0.96126 "DNA segment, Chr 10, ERATO Doi 494, expressed" D10Ertd494e  
1445180\_at 1.29916 steroid 5 alpha-reductase 2-like Srd5a2l  
1445181\_at 0.96783 echinoderm microtubule associated protein like 5 Eml5  
1445182\_at 0.98483 Zinc finger protein 672 Zfp672  
1445183\_s\_at 0.98847 "DNA segment, Chr 7, ERATO Doi 523, expressed" D7Ertd523e  
1445184\_at 0.92295 RIKEN cDNA 9130019O22 gene 9130019O22Rik  
1445185\_at 0.99881 "tubulin tyrosine ligase-like family, member 10" Ttl10  
1445186\_at 0.98709 stanniocalcin 2 Stc2  
1445187\_at 1.00073 RIKEN cDNA 9430070O13 gene 9430070O13Rik  
1445188\_at 0.95037 Gephyrin Gphn  
1445189\_at 0.88000 G patch domain containing 2 Gpatc2  
1445190\_at 0.95460 golgi phosphoprotein 4 Golph4  
1445191\_at 1.02199 Vexonuclease 3'-5' domain-like 1 Exdl1  
1445192\_at 0.98601 "DNA segment, Chr 8, ERATO Doi 575, expressed" D8Ertd575e  
1445193\_x\_at 1.00852 "DNA segment, Chr 8, ERATO Doi 575, expressed" D8Ertd575e  
1445194\_at 0.97548 connector enhancer of kinase suppressor of Ras 2 Cnksr2  
1445195\_at 1.17536 expressed sequence C77631 C77631  
1445196\_at 1.09570 expressed sequence C79595 C79595  
1445197\_x\_at 1.03359 expressed sequence C79595 C79595  
1445198\_at 2.44614 "ubiquitously transcribed tetratricopeptide repeat gene, X chromosome" Utx  
1445199\_at 0.93410 Transcribed locus ---  
1445200\_at 1.09330 "FERM, RhoGEF (Arhgef) and pleckstrin domain protein 1 (chondrocyte-  
derived)" Farp1  
1445201\_at 1.26154 zinc finger protein 53 Zfp53  
1445202\_at 1.01791 "0 day neonate cerebellum cDNA, RIKEN full-length enriched library, clone:



C230022P04 product:unclassifiable, full insert sequence" ---

1445203\_at 0.99682 PDZ domain containing 2 Pdzd2

1445204\_at 0.99821 Coiled-coil domain containing 85A Ccdc85a

1445205\_at 1.04930 GTP binding protein 3 Gtpbp3

1445206\_at 0.94299 "ZW10 homolog (Drosophila), centromere/kinetochore protein" Zw10

1445207\_at 1.04015 Hypothetical protein LOC208426 D230050A05

1445208\_at 0.95791 exonuclease 3"-5" domain-like 2 Exdl2

1445209\_at 0.93610 expressed sequence AU021745 AU021745

1445210\_at 2.19703 Transcribed locus ---

1445211\_at 1.20603 "PREDICTED: Mus musculus hypothetical protein LOC626411 (LOC626411), mRNA" ---

1445212\_at 1.35391 "3 days neonate thymus cDNA, RIKEN full-length enriched library, clone: A630021H04 product:unclassifiable, full insert sequence" ---

1445213\_at 0.99901 cylindromatosis (turban tumor syndrome) Cyld

1445214\_at 1.04315 Similar to reduced expression 2 LOC195531

1445215\_at 1.09626 RIKEN cDNA 2600003E23 gene 2600003E23Rik

1445216\_at 0.98842 --- ---

1445217\_at 1.06028 RIKEN cDNA A730073F16 gene A730073F16Rik

1445218\_at 1.12782 Ventral anterior homeobox containing gene 2 Vax2

1445219\_at 0.94179 olfactory receptor 315 Olfr315

1445220\_at 1.04873 BTB (POZ) domain containing 9 Btbd9

1445221\_at 0.98214 Transcribed locus ---

1445222\_at 1.01405 CD22 antigen Cd22

1445223\_at 1.10958 --- ---

1445224\_at 0.93648 "Adaptor-related protein complex 3, beta 2 subunit" Ap3b2

1445225\_at 1.34210 RIKEN cDNA 2410001C21 gene 2410001C21Rik

1445226\_at 1.92883 cDNA sequence BC023969 BC023969

1445227\_at 1.09376 "Tumor necrosis factor (ligand) superfamily, member 13" Tnfsf13

1445228\_at 0.92737 "Sprouty protein with EVH-1 domain 1, related sequence" Spred1

1445229\_at 1.18284 diacylglycerol O-acyltransferase 1 Dgat1

1445230\_at 1.04725 Nuclear receptor co-repressor 1 Ncor1

1445231\_at 0.90116 RIKEN cDNA B230112C05 gene B230112C05Rik

1445232\_at 1.07461 Deducator of cytokinesis 9 Dock9

1445233\_at 1.07893 hypothetical protein 9130416B15 9130416B15

1445234\_at 1.00588 RIKEN cDNA C130030K03 gene C130030K03Rik

1445235\_at 1.48658 YTH domain family 3 Ythdf3

1445236\_at 1.00307 Hypothetical protein LOC626410 LOC626410

1445237\_at 1.07552 --- ---

1445238\_at 1.02801 chemokine (C-C motif) ligand 21b Ccl21b

1445239\_at 1.13817 GATA zinc finger domain containing 2A Gatad2a

1445240\_at 1.05446 expressed sequence AU019796 AU019796

1445241\_at 0.94591 RAB11 family interacting protein 4 (class II) Rab11fip4

1445242\_at 0.70381 glycerol kinase Gyk

1445243\_at 1.07013 "DNA segment, Chr 10, ERATO Doi 533, expressed" D10ErtD533e  
1445244\_at 1.15552 TM2 domain containing 1 Tm2d1  
1445245\_at 1.33805 RIKEN cDNA B130065D12 gene B130065D12Rik  
1445246\_at 0.84768 "G elongation factor, mitochondrial 2" Gfm2  
1445247\_at 0.96183 RIKEN cDNA C530044C16 gene C530044C16Rik  
1445248\_at 0.88765 Tetratricopeptide repeat domain 18 Ttc18  
1445249\_at 1.02687 --- ---  
1445250\_at 0.94073 Hephaestin-like 1 Heph11  
1445251\_at 1.15065 "tumor necrosis factor (ligand) superfamily, member 13b" Tnfsf13b  
1445252\_at 0.97073 kringle containing transmembrane protein 1 Kremen1  
1445253\_at 1.01919 Olfactory receptor 1417 Olfr1417  
1445254\_at 1.03933 --- ---  
1445255\_at 0.94322 Rap guanine nucleotide exchange factor (GEF) 5 Rapgef5  
1445256\_at 1.09885 Vinculin Vcl  
1445257\_at 1.03666 expressed sequence AU022531 AU022531  
1445258\_at 0.88111 Fibroblast growth factor 9 Fgf9  
1445259\_at 0.94731 "sodium channel, voltage-gated, type II, alpha 1" Scn2a1  
1445260\_at 1.40226 "DCUN1D1 DCN1, defective in cullin neddylation 1, domain containing 1 (S. cerevisiae)" Dcun1d1  
1445261\_at 0.97421 "DNA segment, Chr 17, ERATO Doi 763, expressed" D17ErtD763e  
1445262\_at 0.97340 --- ---  
1445263\_at 1.49653 Cystatin F (leukocystatin) Cst7  
1445264\_at 0.93047 "cation channel, sperm associated 2" Catsper2  
1445265\_at 1.03277 "Ubiquitously transcribed tetratricopeptide repeat gene, Y chromosome" Uty  
1445266\_at 0.92516 "excision repair cross-complementing rodent repair deficiency, complementation group 1" Ercc1  
1445267\_at 1.22833 Similar to zinc finger protein 709 LOC626854  
1445268\_at 0.96242 "Transcribed locus, weakly similar to NP\_059506.1 coatomer protein complex, subunit gamma 2 [Mus musculus]" ---  
1445269\_at 1.11173 Coiled-coil domain containing 98 Ccdc98  
1445270\_at 1.04366 Transcribed locus ---  
1445271\_at 1.07995 RIKEN cDNA 9230105E10 gene 9230105E10Rik  
1445272\_at 1.07206 Ring finger protein 38 Rnf38  
1445273\_at 1.52967 "DNA segment, Chr 10, ERATO Doi 638, expressed" D10ErtD638e  
1445274\_at 0.79979 cDNA sequence BC024063 BC024063  
1445275\_at 0.92743 RIKEN cDNA C130092O11 gene C130092O11Rik  
1445276\_at 0.96575 expressed sequence C80154 C80154  
1445277\_at 1.78639 "16 days neonate thymus cDNA, RIKEN full-length enriched library, clone: A130006J10 product:unclassifiable, full insert sequence" ---  
1445278\_at 0.91670 gametogenetin Ggn  
1445279\_at 0.95791 Transcribed locus ---  
1445280\_at 0.95798 "adaptor-related protein complex 3, delta 1 subunit" Ap3d1  
1445281\_a\_at 1.11658 RIKEN cDNA B230311B06 gene B230311B06Rik

1445282\_at 1.08017 "Muskelin 1, intracellular mediator containing kelch motifs" Mkl1  
1445283\_at 1.09605 --- ---  
1445284\_at 0.90432 --- ---  
1445285\_at 0.90398 Histamine receptor H 3 Hrh3  
1445286\_at 1.06437 RIKEN cDNA 6430701C03 gene 6430701C03Rik  
1445287\_at 0.92288 "Adult male spinal cord cDNA, RIKEN full-length enriched library, clone:  
A330010P20 product:unclassifiable, full insert sequence" ---  
1445288\_at 0.98192 --- ---  
1445289\_at 1.03358 --- ---  
1445290\_at 1.03792 Hormonally upregulated Neu-associated kinase Hunk  
1445291\_at 1.00895 arylsulfatase A Arsa  
1445292\_at 1.05233 CD300A antigen Cd300a  
1445293\_at 1.02447 RIKEN cDNA 2610002D18 gene 2610002D18Rik  
1445294\_at 1.03360 "Adult male corpora quadrigemina cDNA, RIKEN full-length enriched library,  
clone:B230354C23 product:unclassifiable, full insert sequence" ---  
1445295\_at 1.09453 Erythrocyte protein band 4.1 Epb4.1  
1445296\_at 0.89854 "DNA segment, Chr 7, ERATO Doi 715, expressed" D7Ertd715e  
1445297\_at 0.95622 Transcribed locus ---  
1445298\_at 0.92445 --- ---  
1445299\_at 1.07741 Protein phosphatase 1H (PP2C domain containing) Ppm1h  
1445300\_at 1.13069 --- ---  
1445301\_at 0.95553 CDNA sequence BC028528 BC028528  
1445302\_at 1.38836 "immunoglobulin superfamily, member 6" Igsf6  
1445303\_at 0.89401 --- ---  
1445304\_at 1.38366 "mahogunin, ring finger 1" Mgrn1  
1445305\_at 1.07181 --- ---  
1445306\_at 0.96875 "CUG triplet repeat, RNA binding protein 2" Cugbp2  
1445307\_at 1.00984 Autism susceptibility candidate 2 Aut2  
1445308\_at 1.03124 tumor suppressing subtransferable candidate 1 Tssc1  
1445309\_at 0.83237 --- ---  
1445310\_at 0.88080 synaptotagmin-like 3 Sytl3  
1445311\_at 0.98002 A kinase (PRKA) anchor protein 13 Akap13  
1445312\_at 1.19371 RIKEN cDNA C530043G21 gene C530043G21Rik  
1445313\_at 1.10796 coenzyme Q9 homolog (yeast) Coq9  
1445314\_at 1.04477 ets variant gene 1 Etv1  
1445315\_at 0.98928 --- ---  
1445316\_at 0.96826 Armadillo repeat containing 9 Armc9  
1445317\_at 1.10742 "Succinate dehydrogenase complex, subunit A, flavoprotein (Fp)" Sdha  
1445318\_at 0.91476 Kelch-like 4 (Drosophila) Klhl4  
1445319\_at 0.87698 "Adult male testis cDNA, RIKEN full-length enriched library,  
clone:4930509G02 product:unclassifiable, full insert sequence" ---  
1445320\_at 0.83441 "12 days embryo spinal ganglion cDNA, RIKEN full-length enriched library,  
clone:D130033J21 product:unclassifiable, full insert sequence" ---

|              |         |                                                                                                                               |               |  |
|--------------|---------|-------------------------------------------------------------------------------------------------------------------------------|---------------|--|
| 1445321_at   | 1.38641 | RIKEN cDNA E430025E21 gene                                                                                                    | E430025E21Rik |  |
| 1445322_x_at | 1.54534 | RIKEN cDNA E430025E21 gene                                                                                                    | E430025E21Rik |  |
| 1445323_at   | 1.07471 | gene regulated by estrogen in breast cancer protein                                                                           | Greb1         |  |
| 1445324_s_at | 0.86801 | gene regulated by estrogen in breast cancer protein                                                                           | Greb1         |  |
| 1445325_at   | 1.14640 | "Protein kinase, cAMP dependent regulatory, type II alpha"                                                                    | Prkar2a       |  |
| 1445326_at   | 0.94391 | sidekick homolog 1 (chicken)                                                                                                  | Sdk1          |  |
| 1445327_at   | 1.10520 | Cytoplasmic FMR1 interacting protein 1                                                                                        | Cyfip1        |  |
| 1445328_at   | 0.48694 | "procollagen, type IV, alpha 4"                                                                                               | Col4a4        |  |
| 1445329_at   | 1.16117 | "dystrobrevin, beta"                                                                                                          | Dtnb          |  |
| 1445330_at   | 0.94215 | protein disulfide isomerase associated 3                                                                                      | Pdia3         |  |
| 1445331_at   | 1.00919 | Transcribed locus                                                                                                             | ---           |  |
| 1445332_at   | 1.04783 | Transcribed locus                                                                                                             | ---           |  |
| 1445333_at   | 0.96251 | ---                                                                                                                           | ---           |  |
| 1445334_at   | 1.12185 | similar to signal recognition particle 54                                                                                     | LOC665155     |  |
| 1445335_at   | 0.97358 | expressed sequence C78888                                                                                                     | C78888        |  |
| 1445336_at   | 0.94637 | RIKEN cDNA 1110032A03 gene                                                                                                    | 1110032A03Rik |  |
| 1445337_at   | 1.12130 | "DnaJ (Hsp40) homolog, subfamily C, member 13"                                                                                | Dnajc13       |  |
| 1445338_at   | 1.11296 | Ring finger protein 144                                                                                                       | Rnf144        |  |
| 1445339_at   | 1.08626 | cyclic nucleotide gated channel alpha 4                                                                                       | Cnga4         |  |
| 1445340_at   | 1.48557 | "pam, highwire, rpm 1"                                                                                                        | Phr1          |  |
| 1445341_at   | 1.66719 | ---                                                                                                                           | ---           |  |
| 1445342_at   | 1.03967 | ---                                                                                                                           | ---           |  |
| 1445343_at   | 0.91510 | transmembrane emp24 protein transport domain containing 5                                                                     | Tmed5         |  |
| 1445344_at   | 0.99008 | Src homology three (SH3) and cysteine rich domain                                                                             | Stac          |  |
| 1445345_at   | 1.20068 | "Pleckstrin homology domain containing, family A member 5"                                                                    | Plekha5       |  |
| 1445346_at   | 1.07592 | "Ankyrin 2, brain"                                                                                                            | Ank2          |  |
| 1445347_at   | 1.09562 | ---                                                                                                                           | ---           |  |
| 1445348_at   | 0.98949 | cell division cycle 40 homolog (yeast)                                                                                        | Cdc40         |  |
| 1445349_at   | 0.93156 | "0 day neonate lung cDNA, RIKEN full-length enriched library, clone: E030049A20 product:unclassifiable, full insert sequence" | ---           |  |
| 1445350_at   | 0.96289 | "protein phosphatase 4, catalytic subunit"                                                                                    | Ppp4c         |  |
| 1445351_at   | 1.04990 | ---                                                                                                                           | ---           |  |
| 1445352_at   | 1.14310 | Transcribed locus                                                                                                             | ---           |  |
| 1445353_at   | 0.85489 | ---                                                                                                                           | ---           |  |
| 1445354_at   | 1.21452 | Transcribed locus                                                                                                             | ---           |  |
| 1445355_at   | 0.99218 | spermatogenesis associated 6                                                                                                  | Spata6        |  |
| 1445356_at   | 0.94497 | ---                                                                                                                           | ---           |  |
| 1445357_at   | 1.16018 | expressed sequence AI851613                                                                                                   | AI851613      |  |
| 1445358_at   | 0.90240 | "tankyrase, TRF1-interacting ankyrin-related ADP-ribose polymerase"                                                           | Tnks          |  |
| 1445359_at   | 1.07963 | adenylate cyclase 1                                                                                                           | Adcy1         |  |
| 1445360_at   | 0.99032 | "Transforming growth factor, beta 1"                                                                                          | Tgfb1         |  |
| 1445361_at   | 1.30828 | ---                                                                                                                           | ---           |  |
| 1445362_at   | 0.95878 | expressed sequence AW456874                                                                                                   | AW456874      |  |

|            |         |                                                                                                                                                           |               |
|------------|---------|-----------------------------------------------------------------------------------------------------------------------------------------------------------|---------------|
| 1445363_at | 1.12032 | RIKEN cDNA 2810055G20 gene                                                                                                                                | 2810055G20Rik |
| 1445364_at | 0.84264 | ---                                                                                                                                                       | ---           |
| 1445365_at | 0.97128 | "membrane-spanning 4-domains, subfamily A, member 7"                                                                                                      | Ms4a7         |
| 1445366_at | 1.00584 | ---                                                                                                                                                       | ---           |
| 1445367_at | 0.81880 | Transcribed locus                                                                                                                                         | ---           |
| 1445368_at | 0.85309 | ---                                                                                                                                                       | ---           |
| 1445369_at | 0.94827 | RIKEN cDNA B230359F08 gene                                                                                                                                | B230359F08Rik |
| 1445370_at | 1.05605 | "Vesicle-associated membrane protein, associated protein B and C"                                                                                         | Vapb          |
| 1445371_at | 1.05333 | "gene model 540, (NCBI)"                                                                                                                                  | Gm540         |
| 1445372_at | 0.94927 | MAM domain containing 1                                                                                                                                   | Mamdc1        |
| 1445373_at | 1.06975 | "Phosphodiesterase 3A, cGMP inhibited"                                                                                                                    | Pde3a         |
| 1445374_at | 1.56355 | Vesicle transport through interaction with t-SNAREs homolog 1A (yeast)                                                                                    | Vti1a         |
| 1445375_at | 1.13516 | intersectin 2                                                                                                                                             | Itsn2         |
| 1445376_at | 1.05861 | Spastin                                                                                                                                                   | Spast         |
| 1445377_at | 1.66869 | "Amyotrophic lateral sclerosis 2 (juvenile) chromosome region, candidate 19 (human)"                                                                      | Als2cr19      |
| 1445378_at | 1.01472 | ---                                                                                                                                                       | ---           |
| 1445379_at | 1.01037 | "Atpase, class VI, type 11C"                                                                                                                              | Atp11c        |
| 1445380_at | 0.90055 | RIKEN cDNA A230072C01 gene                                                                                                                                | A230072C01Rik |
| 1445381_at | 1.05653 | ---                                                                                                                                                       | ---           |
| 1445382_at | 1.02578 | Transcribed locus                                                                                                                                         | ---           |
| 1445383_at | 0.98676 | transmembrane protein 44                                                                                                                                  | Tmem44        |
| 1445384_at | 1.03530 | RIO kinase 2 (yeast)                                                                                                                                      | Riok2         |
| 1445385_at | 0.93235 | "Adult inner ear cDNA, RIKEN full-length enriched library, clone: F930025M14 product:unclassifiable, full insert sequence"                                | ---           |
| 1445386_at | 0.95972 | Transcribed locus                                                                                                                                         | ---           |
| 1445387_at | 1.05190 | SUMO/sentrin specific peptidase 6                                                                                                                         | Senp6         |
| 1445388_at | 0.89773 | CD226 antigen                                                                                                                                             | Cd226         |
| 1445389_at | 0.95045 | Zona pellucida 3 receptor                                                                                                                                 | Zp3r          |
| 1445390_at | 1.14664 | "PRKC, apoptosis, WT1, regulator"                                                                                                                         | Pawr          |
| 1445391_at | 1.24644 | diaphanous homolog 1 (Drosophila) /// similar to Protein diaphanous homolog 1 (Diaphanous-related formin-1) (DRF1) (mDIA1) (p140mDIA) Diap1 /// LOC671545 |               |
| 1445392_at | 0.86556 | Transmembrane 7 superfamily member 3                                                                                                                      | Tm7sf3        |
| 1445393_at | 0.96888 | "Solute carrier family 24 (sodium/potassium/calcium exchanger), member 2"                                                                                 | Slc24a2       |
| 1445394_at | 0.90008 | RIKEN cDNA 4933409K07 gene                                                                                                                                | 4933409K07Rik |
| 1445395_at | 1.28650 | "Protein kinase C, alpha"                                                                                                                                 | Prkca         |
| 1445396_at | 0.99295 | leucine-rich repeats and calponin homology (CH) domain containing 1                                                                                       | Lrch1         |
| 1445397_at | 1.22815 | ---                                                                                                                                                       | ---           |
| 1445398_at | 0.99730 | RIKEN cDNA 3732412D22 gene                                                                                                                                | 3732412D22Rik |
| 1445399_at | 0.99814 | killer cell lectin-like receptor subfamily B member 1D                                                                                                    | Klrk1d        |
| 1445400_at | 1.50082 | Hepatitis B virus x interacting protein                                                                                                                   | Hbxip         |
| 1445401_at | 0.97518 | Shroom                                                                                                                                                    | Shrm          |

|            |         |                                                                                   |               |
|------------|---------|-----------------------------------------------------------------------------------|---------------|
| 1445402_at | 1.67760 | Adenosine kinase                                                                  | Adk           |
| 1445403_at | 0.96031 | Transcribed locus                                                                 | ---           |
| 1445404_at | 0.84082 | kinesin family member 27                                                          | Kif27         |
| 1445405_at | 1.04417 | ---                                                                               | ---           |
| 1445406_at | 0.84294 | expressed sequence C77494                                                         | C77494        |
| 1445407_at | 0.94691 | ---                                                                               | ---           |
| 1445408_at | 1.06488 | "similar to dynein, axonemal, intermediate polypeptide 2"                         | LOC432611     |
| 1445409_at | 0.99260 | LPS-responsive beige-like anchor                                                  | Lrba          |
| 1445410_at | 1.24667 | "MAK10 homolog, amino-acid N-acetyltransferase subunit, ( <i>S. cerevisiae</i> )" |               |
| Mak10      |         |                                                                                   |               |
| 1445411_at | 1.16038 | ---                                                                               | ---           |
| 1445412_at | 1.07523 | coiled-coil domain containing 73                                                  | Ccdc73        |
| 1445413_at | 0.88308 | "Bone morphogenetic protein receptor, type 1A"                                    | Bmpr1a        |
| 1445414_at | 1.08769 | Transcribed locus                                                                 | ---           |
| 1445415_at | 0.92801 | Hypothetical protein B230303A05                                                   | B230303A05    |
| 1445416_at | 1.00575 | Testis specific gene A14                                                          | Tsga14        |
| 1445417_at | 1.16588 | Eph receptor B2                                                                   | Ephb2         |
| 1445418_at | 1.13342 | "Smg-6 homolog, nonsense mediated mRNA decay factor ( <i>C. elegans</i> )"        |               |
| Smg6       |         |                                                                                   |               |
| 1445419_at | 1.00261 | GTP-binding protein 8 (putative)                                                  | Gtpbp8        |
| 1445420_at | 1.14596 | Myocyte enhancer factor 2C                                                        | Mef2c         |
| 1445421_at | 0.93444 | Transcribed locus                                                                 | ---           |
| 1445422_at | 1.03015 | hypothetical protein LOC621549                                                    | LOC621549     |
| 1445423_at | 1.06266 | AT rich interactive domain 5B ( <i>Mrf1</i> like)                                 | Arid5b        |
| 1445424_at | 1.05252 | ---                                                                               | ---           |
| 1445425_at | 0.94017 | hypothetical gene supported by AK040104                                           | LOC432958     |
| 1445426_at | 1.38544 | Mitogen-activated protein kinase kinase kinase kinase 5                           | Map4k5        |
| 1445427_at | 1.27641 | Nemo like kinase                                                                  | Nlk           |
| 1445428_at | 0.95459 | ---                                                                               | ---           |
| 1445429_at | 0.88832 | Prune homolog ( <i>Drosophila</i> )                                               | Prune         |
| 1445430_at | 0.98750 | Rho GTPase activating protein 28                                                  | Arhgap28      |
| 1445431_at | 0.96708 | "Serine/threonine kinase 39, STE20/SPS1 homolog (yeast)"                          | Stk39         |
| 1445432_at | 1.03825 | ---                                                                               | ---           |
| 1445433_at | 0.92323 | glycosyltransferase 8 domain containing 2                                         | Glt8d2        |
| 1445434_at | 1.05347 | snurportin 1                                                                      | Snupn         |
| 1445435_at | 1.04635 | "gene model 732, (NCBI)"                                                          | Gm732         |
| 1445436_at | 1.02741 | Transcribed locus                                                                 | ---           |
| 1445437_at | 0.99295 | RIKEN cDNA 2310015A05 gene                                                        | 2310015A05Rik |
| 1445438_at | 1.09380 | DDHD domain containing 1                                                          | Ddhd1         |
| 1445439_at | 1.05445 | erythrocyte protein band 4.9                                                      | Epb4.9        |
| 1445440_at | 1.77944 | RIKEN cDNA A430106J12 gene                                                        | A430106J12Rik |
| 1445441_at | 0.93198 | similar to RIKEN cDNA 1700129C05                                                  | LOC380907     |
| 1445442_at | 1.04242 | microtubule-associated protein 9                                                  | Mtap9         |

1445443\_at 1.49647 --- ---  
1445444\_at 1.08406 "0 day neonate cerebellum cDNA, RIKEN full-length enriched library, clone: C230092G11 product:unclassifiable, full insert sequence" ---  
1445445\_s\_at 1.05769 prostaglandin E receptor 1 (subtype EP1) Ptger1  
1445446\_at 0.86804 Transcribed locus ---  
1445447\_at 0.93410 --- ---  
1445448\_at 1.10297 --- ---  
1445449\_at 0.86557 "Phosphodiesterase 4B, cAMP specific" Pde4b  
1445450\_x\_at 1.01278 hypothetical protein A530021J07 A530021J07  
1445451\_at 0.96194 --- ---  
1445452\_at 1.09015 Tnf receptor-associated factor 1 Traf1  
1445453\_at 1.06401 --- ---  
1445454\_at 1.03758 "DNA segment, Chr 2, ERATO Doi 282, expressed" D2Ertd282e  
1445455\_at 1.02962 "DNA segment, Chr 3, ERATO Doi 270, expressed" D3Ertd270e  
1445456\_at 1.17373 --- ---  
1445457\_at 1.03938 "Adult male cecum cDNA, RIKEN full-length enriched library, clone:9130219A07 product:hypothetical protein, full insert sequence" ---  
1445458\_at 1.03024 "MAS-related GPR, member G" Mrgprg  
1445459\_at 1.00203 somatostatin receptor 5 Sstr5  
1445460\_at 1.02884 Transcribed locus ---  
1445461\_at 0.91222 Transcribed locus ---  
1445462\_at 0.91399 --- ---  
1445463\_at 1.14287 aminopeptidase puromycin sensitive Npepps  
1445464\_at 0.93857 --- ---  
1445465\_at 0.84020 expressed sequence N28178 N28178  
1445466\_at 1.19643 MAP6 domain containing 1 Map6d1  
1445467\_at 0.87701 Transcribed locus ---  
1445468\_at 1.14806 "PREDICTED: Mus musculus hypothetical protein LOC625847 (LOC625847), mRNA" ---  
1445469\_at 1.00777 Autism susceptibility candidate 2 Aut2  
1445470\_at 0.87928 similar to alpha 3 type VI collagen isoform 4 precursor /// similar to alpha 3 type VI collagen isoform 4 precursor LOC235580 /// LOC669304  
1445471\_at 0.92030 "Transcriptional adaptor 2 (ADA2 homolog, yeast)-like" Tada2l  
1445472\_at 0.87274 RIKEN cDNA 2210412E05 gene /// similar to Carcinoembryonic antigen-related cell adhesion molecule 1 precursor (Biliary glycoprotein 1) (BGP-1) (Murine hepatitis virus receptor) (MHV-R) (Biliary glycoprotein D) 2210412E05Rik /// LOC672817  
1445473\_at 1.01413 "5-azacytidine induced gene 2 /// DIRAS family, GTP-binding RAS-like 2" Azi2 /// Diras2  
1445474\_at 0.86267 "DNA primase, p58 subunit" Prim2  
1445475\_at 0.90536 p21 (CDKN1A)-activated kinase 6 Pak6  
1445476\_at 1.04421 "Mus musculus, clone IMAGE:1313576, mRNA" ---  
1445477\_at 1.04976 Transcribed locus ---  
1445478\_at 0.86416 --- ---

|            |                                                                                                                                                                        |                     |
|------------|------------------------------------------------------------------------------------------------------------------------------------------------------------------------|---------------------|
| 1445479_at | 1.11442 --- ---                                                                                                                                                        |                     |
| 1445480_at | 0.96859 G protein-coupled receptor 19                                                                                                                                  | Gpr19               |
| 1445481_at | 0.82265 expressed sequence AI317158                                                                                                                                    | AI317158            |
| 1445482_at | 1.00014 Transcribed locus                                                                                                                                              | ---                 |
| 1445483_at | 0.96363 "v-abl Abelson murine leukemia viral oncogene 2 (arg, Abelson-related gene)"                                                                                   | Abl2                |
| 1445484_at | 0.84611 "cytochrome c, somatic"                                                                                                                                        | Cycc                |
| 1445485_at | 0.96633 "DNA segment, Chr 7, ERATO Doi 187, expressed"                                                                                                                 | D7Erttd187e         |
| 1445486_at | 1.02400 Leucine rich repeat containing 49                                                                                                                              | Lrrc49              |
| 1445487_at | 0.96482 Rap1 interacting factor 1 homolog (yeast)                                                                                                                      | Rif1                |
| 1445488_at | 1.10368 Transcribed locus                                                                                                                                              | ---                 |
| 1445489_at | 1.13518 RIKEN cDNA 5830472M02 gene                                                                                                                                     | 5830472M02Rik       |
| 1445490_at | 1.20125 expressed sequence C77805                                                                                                                                      | C77805              |
| 1445491_at | 1.02846 expressed sequence C79685                                                                                                                                      | C79685              |
| 1445492_at | 1.20488 "Microtubule-associated protein, RP/EB family, member 2"                                                                                                       | Mapre2              |
| 1445493_at | 0.98671 expressed sequence AU022255                                                                                                                                    | AU022255            |
| 1445494_at | 1.08669 "Achalasia, adrenocortical insufficiency, alacrimia"                                                                                                           | Aaas                |
| 1445495_at | 0.98214 --- ---                                                                                                                                                        |                     |
| 1445496_at | 0.90550 AU RNA binding protein/enoyl-coenzyme A hydratase                                                                                                              | Auh                 |
| 1445497_at | 0.95608 Carbonic anhydrase 10                                                                                                                                          | Car10               |
| 1445498_at | 0.95465 "Ryanodine receptor 2, cardiac"                                                                                                                                | Ryr2                |
| 1445499_at | 1.03869 zinc finger CCCH type containing 13                                                                                                                            | Zc3h13              |
| 1445500_at | 1.07470 A disintegrin and metallopeptidase domain 17                                                                                                                   | Adam17              |
| 1445501_at | 1.04043 "12 days embryo spinal cord cDNA, RIKEN full-length enriched library, clone: C530045D16 product:unclassifiable, full insert sequence"                          | ---                 |
| 1445502_at | 1.00058 "15 days embryo head cDNA, RIKEN full-length enriched library, clone: D930047H10 product:unclassifiable, full insert sequence"                                 | ---                 |
| 1445503_at | 1.01168 "gene model 715, (NCBI) /// similar to CG4768-PA"                                                                                                              | Gm715 /// LOC671594 |
| 1445504_at | 0.85489 similar to Nucleolar phosphoprotein p130 (Nucleolar 130 kDa protein) (140 kDa nucleolar phosphoprotein) (Nopp140) (Nucleolar and coiled-body phosphoprotein 1) | LOC331392           |
| 1445505_at | 1.01303 N-deacetylase/N-sulfotransferase (heparan glucosaminyl) 1                                                                                                      | Ndst1               |
| 1445506_at | 1.11188 RIKEN cDNA 1300007F04 gene                                                                                                                                     | 1300007F04Rik       |
| 1445507_at | 1.15655 RIKEN cDNA 1110054O05 gene                                                                                                                                     | 1110054O05Rik       |
| 1445508_at | 0.95396 --- ---                                                                                                                                                        |                     |
| 1445509_at | 0.95332 Activating transcription factor 7                                                                                                                              | Atf7                |
| 1445510_at | 0.92935 expressed sequence C79601                                                                                                                                      | C79601              |
| 1445511_at | 1.04833 centrin 4 /// similar to centrin 4                                                                                                                             | Cetn4 /// LOC632802 |
| 1445512_at | 1.39189 --- ---                                                                                                                                                        |                     |
| 1445513_at | 0.94358 "Vezatin, adherens junctions transmembrane protein"                                                                                                            | Vezt                |
| 1445514_at | 1.20358 von Hippel-Lindau syndrome homolog                                                                                                                             | Vhlh                |
| 1445515_at | 1.00306 --- ---                                                                                                                                                        |                     |
| 1445516_at | 1.04342 --- ---                                                                                                                                                        |                     |
| 1445517_at | 1.24755 --- ---                                                                                                                                                        |                     |



1445518\_at 1.12253 Zinc finger homeobox 1b Zfhx1b  
1445519\_at 0.90633 "potassium voltage-gated channel, delayed-rectifier, subfamily S, member 3"  
Kcns3  
1445520\_at 0.94478 "RAB4A, member RAS oncogene family" Rab4a  
1445521\_at 1.05033 "ELAV (embryonic lethal, abnormal vision, Drosophila)-like 1 (Hu antigen  
R)" Elavl1  
1445522\_at 1.02381 "ATPase, class I, type 8B, member 4" Atp8b4  
1445523\_at 1.05024 Gap junction membrane channel protein epsilon 1 Gje1  
1445524\_at 1.03914 Dopa decarboxylase Ddc  
1445525\_at 0.95359 kinesin family member 14 Kif14  
1445526\_at 0.97466 cDNA sequence AY512915 AY512915  
1445527\_at 1.12307 Karyopherin (importin) alpha 3 Kpna3  
1445528\_at 0.97212 "Solute carrier family 28 (sodium-coupled nucleoside transporter), member 3"  
Slc28a3  
1445529\_at 1.04092 --- ---  
1445530\_at 1.06337 RIKEN cDNA 5330401P04 gene 5330401P04Rik  
1445531\_at 0.84502 CUB and Sushi multiple domains 1 Csm1  
1445532\_at 0.82844 RIKEN cDNA C230040D10 gene C230040D10Rik  
1445533\_at 1.18324 RIKEN cDNA A630047E20 gene A630047E20Rik  
1445534\_at 3.60083 "Filamin, beta" Flnb  
1445535\_at 2.41781 expressed sequence AA407107 AA407107  
1445536\_at 1.08948 expressed sequence AW061096 AW061096  
1445537\_at 0.94648 SLIT-ROBO Rho GTPase activating protein 3 Srgap3  
1445538\_at 1.04329 Autism susceptibility candidate 2 Auts2  
1445539\_at 0.93872 "PREDICTED: Mus musculus similar to 60S ribosomal protein L12  
(LOC382344), mRNA" ---  
1445540\_at 0.85467 Dynamin 3 Dnm3  
1445541\_at 0.91426 "jumonji, AT rich interactive domain 1A (Rbp2 like)" Jarid1a  
1445542\_at 0.99984 RIKEN cDNA 4930579C12 gene 4930579C12Rik  
1445543\_at 1.18564 RIKEN cDNA 9830124H08 gene 9830124H08Rik  
1445544\_x\_at 1.01446 oligonucleotide/oligosaccharide-binding fold containing 1 Obfc1  
1445545\_at 1.10151 Transmembrane protein 77 Tmem77  
1445546\_at 1.03688 expressed sequence AI844685 AI844685  
1445547\_at 1.44347 Transcribed locus ---  
1445548\_at 0.93215 Radixin Rdx  
1445549\_at 0.84346 --- ---  
1445550\_at 0.93687 --- ---  
1445551\_at 0.90558 nuclear factor related to kappa B binding protein Nfrkb  
1445552\_at 1.02344 RIKEN cDNA A830039H10 gene A830039H10Rik  
1445553\_at 1.11101 resistance to inhibitors of cholinesterase 3 homolog (C. elegans) Ric3  
1445554\_at 0.98099 --- ---  
1445555\_at 1.02798 "Transient receptor potential cation channel, subfamily M, member 3" Trpm3  
1445556\_at 0.85630 Transcribed locus ---

1445557\_at 0.98094 RIKEN cDNA 0610040B10 gene 0610040B10Rik  
1445558\_at 0.99046 RIKEN cDNA 5930430L01 gene 5930430L01Rik  
1445559\_at 1.13398 Retinitis pigmentosa 9 homolog (human) Rp9h  
1445560\_at 0.96561 Transcribed locus ---  
1445561\_at 0.83194 Glutamate receptor interacting protein 1 Grip1  
1445562\_at 0.97283 Zinc finger and BTB domain containing 16 Zbtb16  
1445563\_at 1.03181 --- ---  
1445564\_at 0.95115 Transcribed locus ---  
1445565\_at 1.01883 "Histone 1, H1e" Hist1h1e  
1445566\_at 1.01622 "Centaurin, beta 2" Centb2  
1445567\_at 1.07857 Growth associated protein 43 Gap43  
1445568\_at 1.05678 Expressed sequence AI842396 AI842396  
1445569\_at 1.09307 similar to kelch-like 9 LOC546611  
1445570\_at 1.25261 "NOL1/NOP2/Sun domain family, member 4" Nsun4  
1445571\_at 1.02541 TANK-binding kinase 1 Tbk1  
1445572\_at 0.83235 forkhead box Q1 Foxq1  
1445573\_at 1.06143 "Protein phosphatase 1, regulatory (inhibitor) subunit 14B" Ppp1r14b  
1445574\_at 1.00782 Transcribed locus ---  
1445575\_at 0.98086 F-box and leucine-rich repeat protein 20 Fbxl20  
1445576\_at 0.90624 RIKEN cDNA 4930526H21 gene 4930526H21Rik  
1445577\_at 0.86442 "PTPRF interacting protein, binding protein 1 (liprin beta 1)" Ppfibp1  
1445578\_at 0.99137 "ELOVL family member 6, elongation of long chain fatty acids (yeast)" Elov16  
1445579\_at 0.97732 "arachidonate lipoxygenase, epidermal" Alox12e  
1445580\_at 0.91450 Matrilin 2 Matn2  
1445581\_at 1.02513 --- ---  
1445582\_at 0.92488 "7 days neonate cerebellum cDNA, RIKEN full-length enriched library, clone:  
A730006J15 product:hypothetical protein, full insert sequence" ---  
1445583\_x\_at 0.98998 "PREDICTED: Mus musculus hypothetical protein LOC621058  
(LOC621058), mRNA" ---  
1445584\_at 0.96227 --- ---  
1445585\_at 0.95848 zinc finger protein 313 Zfp313  
1445586\_at 0.95312 Ca<2+>dependent activator protein for secretion Cadps  
1445587\_at 0.97104 --- ---  
1445588\_at 0.99289 ankyrin repeat domain 44 Ankrd44  
1445589\_at 1.12874 "Solute carrier family 23 (nucleobase transporters), member 2" Slc23a2  
1445590\_at 0.89148 Transcribed locus ---  
1445591\_at 0.92911 Sarcosine dehydrogenase Sardh  
1445592\_at 1.04522 --- ---  
1445593\_at 1.19547 "Adult male testis cDNA, RIKEN full-length enriched library,  
clone:4930414J05 product:unclassifiable, full insert sequence" ---  
1445594\_at 1.10072 Heterogeneous nuclear ribonucleoprotein L Hnrpl  
1445595\_at 1.10114 Transcribed locus ---  
1445596\_at 1.00104 "Adenosine deaminase, RNA-specific" Adar

|              |         |                                                                                                                                  |               |
|--------------|---------|----------------------------------------------------------------------------------------------------------------------------------|---------------|
| 1445597_s_at | 0.90638 | HRAS like suppressor 3                                                                                                           | Hrasls3       |
| 1445598_at   | 1.17520 | UDP-N-acetyl-alpha-D-galactosamine: polypeptide N-acetylgalactosaminyltransferase 7                                              | Galnt7        |
| 1445599_at   | 1.00944 | fibronectin type III domain containing 7                                                                                         | Fndc7         |
| 1445600_at   | 1.89417 | Insulin-like growth factor I receptor                                                                                            | Igf1r         |
| 1445601_at   | 1.09519 | "6 days neonate spleen cDNA, RIKEN full-length enriched library, clone: F430214H02 product:unclassifiable, full insert sequence" | ---           |
| 1445602_at   | 0.98007 | RIKEN cDNA A630055G03 gene                                                                                                       | A630055G03Rik |
| 1445603_at   | 1.01549 | Sorcin                                                                                                                           | Sri           |
| 1445604_at   | 1.06624 | Transcribed locus                                                                                                                | ---           |
| 1445605_s_at | 1.04002 | RIKEN cDNA 4921533L14 gene                                                                                                       | 4921533L14Rik |
| 1445606_a_at | 0.85298 | RIKEN cDNA 2900009J06 gene                                                                                                       | 2900009J06Rik |
| 1445607_at   | 1.01481 | RIKEN cDNA 4833418A01 gene                                                                                                       | 4833418A01Rik |
| 1445608_at   | 0.96142 | RIKEN cDNA 9130204L05 gene                                                                                                       | 9130204L05Rik |
| 1445609_at   | 0.88126 | Transcribed locus                                                                                                                | ---           |
| 1445610_at   | 0.94323 | CDNA sequence BC039093                                                                                                           | BC039093      |
| 1445611_at   | 1.08779 | RIKEN cDNA 1810044A24 gene                                                                                                       | 1810044A24Rik |
| 1445612_at   | 1.05628 | ---                                                                                                                              | ---           |
| 1445613_at   | 1.01370 | "Nuclear receptor subfamily 2, group C, member 2"                                                                                | Nr2c2         |
| 1445614_at   | 0.86099 | ---                                                                                                                              | ---           |
| 1445615_at   | 1.01743 | ---                                                                                                                              | ---           |
| 1445616_at   | 1.14584 | "Eukaryotic translation initiation factor 4 gamma, 3"                                                                            | Eif4g3        |
| 1445617_at   | 0.93640 | Transcribed locus                                                                                                                | ---           |
| 1445618_at   | 0.95128 | ---                                                                                                                              | ---           |
| 1445619_at   | 1.06737 | ---                                                                                                                              | ---           |
| 1445620_at   | 0.88765 | Transcribed locus                                                                                                                | ---           |
| 1445621_at   | 1.02222 | ---                                                                                                                              | ---           |
| 1445622_at   | 0.87654 | ---                                                                                                                              | ---           |
| 1445623_at   | 0.97888 | ---                                                                                                                              | ---           |
| 1445624_at   | 0.99880 | "DNA segment, Chr 8, ERATO Doi 587, expressed"                                                                                   | D8Ertd587e    |
| 1445625_at   | 0.86866 | Transcribed locus                                                                                                                | ---           |
| 1445626_at   | 1.67058 | "Lectin, galactose binding, soluble 3"                                                                                           | Lgals3        |
| 1445627_at   | 1.26743 | Oxysterol binding protein-like 9                                                                                                 | Osbpl9        |
| 1445628_at   | 0.93189 | Rho GTPase activating protein 21                                                                                                 | Arhgap21      |
| 1445629_at   | 1.69181 | "Solute carrier family 35 (UDP-glucuronic acid/UDP-N-acetylgalactosamine dual transporter), member D1"                           | Slc35d1       |
| 1445630_at   | 1.05682 | ---                                                                                                                              | ---           |
| 1445631_at   | 0.98373 | ---                                                                                                                              | ---           |
| 1445632_at   | 1.02884 | oxoglutarate dehydrogenase (lipoamide)                                                                                           | Ogdh          |
| 1445633_at   | 1.11573 | Reduced expression 2                                                                                                             | Rex2          |
| 1445634_at   | 1.17423 | Microtubule-associated protein tau                                                                                               | Mapt          |
| 1445635_at   | 0.86871 | Eph receptor A7                                                                                                                  | Epha7         |
| 1445636_at   | 0.99097 | Formin-like 1                                                                                                                    | Fmn11         |

1445637\_at 0.88149 DNA methyltransferase (cytosine-5) 1 Dnmt1  
1445638\_at 1.07116 Myeloid ecotropic viral integration site-related gene 1 Mrg1  
1445639\_at 0.92060 RIKEN cDNA 9130014G24 gene 9130014G24Rik  
1445640\_at 1.06695 Holocarboxylase synthetase (biotin- [propionyl-Coenzyme A-carboxylase (ATP-hydrolysing)] ligase) Hlcs  
1445641\_at 1.95357 "ELOVL family member 6, elongation of long chain fatty acids (yeast)" Elovl6  
1445642\_at 0.87641 LEM domain containing 1 Lemd1  
1445643\_at 1.01183 "PREDICTED: Mus musculus similar to spindle assembly associated Sfi1 homolog isoform b (LOC621860), mRNA" ---  
1445644\_at 0.91168 RIKEN cDNA A830091I15 gene A830091I15Rik  
1445645\_at 1.01691 A disintegrin and metallopeptidase domain 22 Adam22  
1445646\_at 1.42849 BTB (POZ) domain containing 1 Btbd1  
1445647\_at 0.92796 expressed sequence AI447881 AI447881  
1445648\_at 0.94984 Transcribed locus ---  
1445649\_x\_at 0.97263 zinc finger protein 142 Zfp142  
1445650\_at 1.01123 --- ---  
1445651\_at 1.29318 "ATPase, Class VI, type 11B" Atp11b  
1445652\_at 1.00329 Stromal antigen 1 Stag1  
1445653\_at 0.91700 cDNA sequence BC031361 BC031361  
1445654\_at 1.04589 RIKEN cDNA 4930422I07 gene 4930422I07Rik  
1445655\_at 0.97376 Transcribed locus ---  
1445656\_at 0.93756 Myelin-associated oligodendrocytic basic protein Mobp  
1445657\_at 1.02436 expressed sequence AW111846 AW111846  
1445658\_at 0.93478 Transcribed locus ---  
1445659\_at 1.00002 Protective protein for beta-galactosidase Ppqb  
1445660\_at 1.29015 RIKEN cDNA 2700094F01 gene 2700094F01Rik  
1445661\_at 0.90873 RIKEN cDNA 4930406D18 gene 4930406D18Rik  
1445662\_x\_at 0.93335 Transcribed locus ---  
1445663\_at 0.94248 --- ---  
1445664\_at 1.84285 Insulin-like growth factor I receptor Igf1r  
1445665\_at 1.28683 Septin 6 6-Sep  
1445666\_at 0.96660 "DNA segment, Chr 15, Wayne State University 169, expressed" D15Wsu169e  
1445667\_at 0.94619 --- ---  
1445668\_at 1.19372 Tubulin-specific chaperone e Tbce  
1445669\_at 1.16033 sprouty homolog 4 (Drosophila) Spry4  
1445670\_at 0.76135 --- ---  
1445671\_at 0.95593 Transcribed locus ---  
1445672\_at 1.07367 Transcribed locus ---  
1445673\_at 0.98743 RIKEN cDNA 2900052N01 gene 2900052N01Rik  
1445674\_at 1.05016 Nitric oxide synthase 3 antisense Nos3as  
1445675\_at 0.98178 Transcribed locus ---  
1445676\_at 1.10094 "Potassium intermediate/small conductance calcium-activated channel, subfamily N, member 2" Kcnn2

1445677\_x\_at 0.96841 "solute carrier family 35, member F2" Slc35f2  
1445678\_at 1.08611 --- ---  
1445679\_at 0.94454 "ATPase, Ca++ transporting, plasma membrane 3" Atp2b3  
1445680\_x\_at 1.00382 coagulation factor II (thrombin) receptor-like 2 F2rl2  
1445681\_at 1.32284 Cell division cycle associated 7 Cdca7  
1445682\_at 0.88183 RIKEN cDNA 2700099C18 gene 2700099C18Rik  
1445683\_at 1.13469 --- ---  
1445684\_s\_at 0.92470 histone deacetylase 2 Hdac2  
1445685\_at 1.00086 growth arrest specific 7 Gas7  
1445686\_at 1.07336 "12 days embryo spinal ganglion cDNA, RIKEN full-length enriched library, clone:D130056G12 product:unclassifiable, full insert sequence" ---  
1445687\_at 1.04060 "gene model 885, (NCBI)" Gm885  
1445688\_at 0.77689 host cell factor C1 Hcfc1  
1445689\_at 2.64233 Transcribed locus ---  
1445690\_at 0.95576 --- ---  
1445691\_at 0.97336 chimerin (chimaerin) 1 Chn1  
1445692\_x\_at 0.82798 --- ---  
1445693\_at 1.05034 v-raf murine sarcoma 3611 viral oncogene homolog Araf  
1445694\_at 0.99006 Transcribed locus ---  
1445695\_at 1.34414 Ataxin 1 Atxn1  
1445696\_x\_at 0.93178 Transcribed locus ---  
1445697\_at 1.23448 Integrin beta 1 binding protein 1 Itgb1bp1  
1445698\_at 1.05019 calpain 11 Capn11  
1445699\_at 0.99130 --- ---  
1445700\_at 1.01552 RIKEN cDNA 2310047M15 gene 2310047M15Rik  
1445701\_at 0.98621 "ATPase, Ca++ transporting, plasma membrane 4" Atp2b4  
1445702\_x\_at 1.05025 phosphatidic acid phosphatase type 2 domain containing 2 Ppapdc2  
1445703\_at 0.91171 expressed sequence AI848149 AI848149  
1445704\_x\_at 1.03386 RIKEN cDNA 2900093B09 gene 2900093B09Rik  
1445705\_x\_at 0.92055 dipeptidylpeptidase 8 Dpp8  
1445706\_x\_at 0.96744 --- ---  
1445707\_at 0.92995 "zinc finger, DHHC domain containing 6 /// similar to Probable palmitoyltransferase ZDHHC6 (Zinc finger DHHC domain-containing protein 6) (DHHC-6) (H4 homolog)" Zdhhc6 /// LOC669170  
1445708\_x\_at 0.92071 RIKEN cDNA 3110021A11 gene 3110021A11Rik  
1445709\_at 1.10780 transformed mouse 3T3 cell double minute 1 Mdm1  
1445710\_x\_at 1.05347 RIKEN cDNA 1110051B16 gene 1110051B16Rik  
1445711\_at 1.02623 expressed sequence BB163080 BB163080  
1445712\_at 0.97236 Transcribed locus ---  
1445713\_at 0.92448 RIKEN cDNA 9630041G16 gene 9630041G16Rik  
1445714\_at 1.01871 RIKEN cDNA B930042K01 gene B930042K01Rik  
1445715\_at 1.06746 RIKEN cDNA A230001M10 gene A230001M10Rik  
1445716\_at 1.00151 --- ---

1445717\_at 1.48133 RIKEN cDNA E130108L08 gene E130108L08Rik  
1445718\_at 1.53989 WD repeat and FYVE domain containing 3 Wdfy3  
1445719\_at 1.02839 "Splicing factor 3a, subunit 1" Sf3a1  
1445720\_at 1.03891 "SAFB-like, transcription modulator" Sltm  
1445721\_at 0.93951 hypothetical protein A830021M18 A830021M18  
1445722\_at 0.97768 "mannosidase, beta A, lysosomal-like" Manbal  
1445723\_at 0.92945 phospholipase C-like 1 Plcl1  
1445724\_at 2.00478 IQ motif containing GTPase activating protein 1 Iqgap1  
1445725\_at 0.85054 --- ---  
1445726\_at 1.06759 RIKEN cDNA C330011K17 gene C330011K17Rik  
1445727\_at 1.37102 ubiquitin protein ligase E3A Ube3a  
1445728\_at 0.85112 --- ---  
1445729\_at 0.97840 "DnaJ (Hsp40) homolog, subfamily A, member 1" Dnaja1  
1445730\_at 0.92481 RAB11 family interacting protein 2 (class I) Rab11fip2  
1445731\_at 0.96069 "Phosphatidylinositol 3-kinase, catalytic, beta polypeptide" Pik3cb  
1445732\_at 1.00383 --- ---  
1445733\_at 0.94665 RIKEN cDNA 2610206G21 gene 2610206G21Rik  
1445734\_at 0.92677 L-threonine dehydrogenase Tdh  
1445735\_at 1.09537 Hyaluronan and proteoglycan link protein 1 Hapln1  
1445736\_at 1.12677 --- ---  
1445737\_at 1.01434 RIKEN cDNA 1700057H21 gene 1700057H21Rik  
1445738\_at 0.98200 --- ---  
1445739\_at 0.95570 RIKEN cDNA 9430080K19 gene 9430080K19Rik  
1445740\_at 0.95585 Transcribed locus ---  
1445741\_at 0.91435 protein phosphatase 1E (PP2C domain containing) Ppm1e  
1445742\_at 0.96874 "Smg-6 homolog, nonsense mediated mRNA decay factor (C. elegans)"  
Smg6  
1445743\_at 1.05710 RIKEN cDNA E330024J20 gene E330024J20Rik  
1445744\_at 1.05073 Transmembrane protein 56 Tmem56  
1445745\_at 0.98366 RNA binding motif protein 17 /// similar to RNA binding motif protein 17  
Rbm17 /// LOC545866  
1445746\_at 1.12416 hypothetical protein LOC630474 /// hypothetical protein LOC630475 ///  
hypothetical LOC638081 LOC630474 /// LOC630475 /// LOC638081  
1445747\_at 1.10263 "15 days embryo male testis cDNA, RIKEN full-length enriched library,  
clone:8030444H21 product:unclassifiable, full insert sequence" ---  
1445748\_at 1.08850 "CD3 antigen, epsilon polypeptide" Cd3e  
1445749\_at 1.03357 Ring finger protein 4 Rnf4  
1445750\_at 0.93027 Transcribed locus ---  
1445751\_at 1.07703 "Procollagen, type XII, alpha 1" Col12a1  
1445752\_at 1.08871 --- ---  
1445753\_at 1.07562 Aldehyde oxidase 3-like 1 Aox3l1  
1445754\_at 0.97377 Acetyl-Coenzyme A carboxylase beta Acacb  
1445755\_at 0.94788 Eyes absent 2 homolog (Drosophila) Eya2

1445756\_at 0.96647 Transcribed locus ---  
 1445757\_at 0.93550 T-box 3 Tbx3  
 1445758\_at 1.07992 CDNA sequence BC049816 BC049816  
 1445759\_at 1.27608 "Sphingomyelin phosphodiesterase 3, neutral" Smpd3  
 1445760\_at 1.02423 antimicrobial peptide RYA3 Rya3  
 1445761\_at 0.92101 "DNA segment, Chr 4, ERATO Doi 628, expressed" D4Ertd628e  
 1445762\_at 0.96633 "Serine protease inhibitor, Kunitz type 1" Spint1  
 1445763\_at 1.09449 RIKEN cDNA 1700013F07 gene 1700013F07Rik  
 1445764\_at 0.82721 "PREDICTED: Mus musculus hypothetical protein LOC628151 (LOC628151), mRNA" ---  
 1445765\_at 0.99744 RIKEN cDNA 9430011C21 gene 9430011C21Rik  
 1445766\_at 1.05158 "Protein tyrosine phosphatase, receptor type, f polypeptide (PTPRF), interacting protein (liprin), alpha 2" Ppfia2  
 1445767\_at 0.92934 "protein tyrosine phosphatase, receptor type, D" Ptprd  
 1445768\_at 0.97926 similar to Ankyrin repeat domain protein 11 (Ankyrin repeat-containing cofactor 1) LOC625662  
 1445769\_at 0.92764 Hypothetical LOC546862 LOC546862  
 1445770\_at 1.03523 --- ---  
 1445771\_at 0.87082 --- ---  
 1445772\_at 0.91806 "DNA segment, Chr 16, ERATO Doi 550, expressed" D16Ertd550e  
 1445773\_at 1.46340 Myeloid ecotropic viral integration site 1 Meis1  
 1445774\_at 0.91765 "Potassium large conductance calcium-activated channel, subfamily M, alpha member 1" Kcnma1  
 1445775\_at 0.97354 --- ---  
 1445776\_at 1.16975 --- ---  
 1445777\_at 1.01305 UPF2 regulator of nonsense transcripts homolog (yeast) Upf2  
 1445778\_at 1.26996 E74-like factor 4 (ets domain transcription factor) Elf4  
 1445779\_at 0.79755 "Glutamate receptor, ionotropic, delta 1" Grid1  
 1445780\_at 0.87690 --- ---  
 1445781\_at 2.16882 SH3 domain protein D19 Sh3d19  
 1445782\_at 0.95772 --- ---  
 1445783\_at 1.16953 --- ---  
 1445784\_at 0.99165 RIKEN cDNA 4933435A13 gene 4933435A13Rik  
 1445785\_at 0.93021 --- ---  
 1445786\_at 1.56724 Braf transforming gene Braf  
 1445787\_at 1.06368 RIKEN cDNA 5033413D22 gene 5033413D22Rik  
 1445788\_at 0.99304 "Insulin-like growth factor 2, binding protein 1" Igf2bp1  
 1445789\_at 0.91610 "0 day neonate kidney cDNA, RIKEN full-length enriched library, clone: D630046H12 product:unclassifiable, full insert sequence" ---  
 1445790\_at 1.02486 gastric inhibitory polypeptide receptor Gipr  
 1445791\_at 1.08299 --- ---  
 1445792\_at 1.08582 Protein phosphatase methylesterase 1 Ppme1  
 1445793\_at 1.01100 RIKEN cDNA 1700011I03 gene 1700011I03Rik

1445794\_at 1.00599 Sperm associated antigen 16 Spag16  
1445795\_at 1.16241 choline kinase alpha Chka  
1445796\_at 1.03791 Expressed sequence AI315068 AI315068  
1445797\_at 0.94699 Peptidylglycine alpha-amidating monooxygenase Pam  
1445798\_at 1.78680 "discs, large homolog 1 (Drosophila)" Dlgh1  
1445799\_at 0.94231 --- ---  
1445800\_at 0.98508 AU RNA binding protein/enoyl-coenzyme A hydratase Auh  
1445801\_at 0.90709 CDNA sequence AK129341 AK129341  
1445802\_at 0.90843 Expressed sequence AU017455 AU017455  
1445803\_at 1.11845 Diaphanous homolog 3 (Drosophila) Diap3  
1445804\_at 0.96663 RIKEN cDNA 9630020C08 gene 9630020C08Rik  
1445805\_x\_at 0.95845 "potassium voltage-gated channel, subfamily H (eag-related), member 3"  
Kcnh3  
1445806\_at 0.99749 component of oligomeric golgi complex 5 Cog5  
1445807\_at 1.04404 "Protein kinase, cGMP-dependent, type I" Prkg1  
1445808\_at 1.05056 --- ---  
1445809\_at 0.96841 Eyes absent 4 homolog (Drosophila) Eya4  
1445810\_at 0.95629 expressed sequence C85163 C85163  
1445811\_at 1.04036 "Neural precursor cell expressed, developmentally down-regulated gene 8"  
Nedd8  
1445812\_at 0.95024 --- ---  
1445813\_at 1.02868 WD repeat domain 27 Wdr27  
1445814\_at 0.90594 "Adult male testis cDNA, RIKEN full-length enriched library,  
clone:4930402N10 product:unclassifiable, full insert sequence" ---  
1445815\_at 0.90450 frizzled homolog 8 (Drosophila) Fzd8  
1445816\_at 1.02729 --- ---  
1445817\_at 0.95035 expressed sequence BB168181 BB168181  
1445818\_at 1.02572 RIKEN cDNA 4930544M13 gene 4930544M13Rik  
1445819\_at 0.93366 RIKEN cDNA A830018L16 gene A830018L16Rik  
1445820\_at 0.97562 --- ---  
1445821\_at 1.04409 Interleukin 1 receptor accessory protein-like 1 Il1rap1l  
1445822\_at 1.08809 similar to CG18631-PA /// similar to CG18631-PA /// similar to CG18631-  
PA LOC639112 /// LOC668310 /// LOC676937  
1445823\_at 0.99283 Coiled-coil domain containing 91 Ccdc91  
1445824\_at 0.81384 zinc finger protein 458 Zfp458  
1445825\_at 0.94632 --- ---  
1445826\_at 1.13084 ankyrin repeat domain 17 Ankrd17  
1445827\_at 1.26360 Protein kinase C binding protein 1 Prkcbp1  
1445828\_at 1.08531 --- ---  
1445829\_at 0.94840 RIKEN cDNA 8030491N06 gene 8030491N06Rik  
1445830\_at 1.60225 "catenin (cadherin associated protein), delta 1" Ctnnd1  
1445831\_at 1.40852 --- ---  
1445832\_at 0.97285 --- ---



1445833\_at 0.93156 RIKEN cDNA 2400010G15 gene 2400010G15Rik  
1445834\_at 0.87839 Transcribed locus ---  
1445835\_at 1.00422 Transcribed locus ---  
1445836\_at 1.11568 Zinc finger protein 516 Zfp516  
1445837\_at 0.91376 Dendritic cell protein GA17 Ga17  
1445838\_at 0.95002 UDP-N-acetyl-alpha-D-galactosamine:polypeptide N-acetylgalactosaminyltransferase 5 Galnt5  
1445839\_at 0.94657 --- ---  
1445840\_at 1.02848 Transcribed locus ---  
1445841\_at 1.04609 leucine rich repeat containing 39 Lrrc39  
1445842\_at 0.94804 --- ---  
1445843\_at 0.92316 chromodomain helicase DNA binding protein 2 Chd2  
1445844\_at 1.01440 "Adult male testis cDNA, RIKEN full-length enriched library, clone:4930547H19 product:unclassifiable, full insert sequence" ---  
1445845\_at 0.95009 Transcribed locus ---  
1445846\_at 0.92605 "Adult male adrenal gland cDNA, RIKEN full-length enriched library, clone:7330409L06 product:unclassifiable, full insert sequence" ---  
1445847\_at 0.97805 --- ---  
1445848\_at 1.10582 hypothetical protein 9630009C16 9630009C16  
1445849\_at 0.93843 similar to PRAME family member 8 /// similar to PRAME family member 8 /// similar to PRAME family member 8 /// similar to PRAME family member 8 LOC665521 /// LOC665546 /// LOC665755 /// LOC666203  
1445850\_at 1.02996 RIKEN cDNA 9530009M10 gene 9530009M10Rik  
1445851\_at 0.98183 --- ---  
1445852\_at 0.97127 "DNA segment, Chr 19, ERATO Doi 200, expressed" D19Ertd200e  
1445853\_at 1.02265 --- ---  
1445854\_at 0.86387 RIKEN cDNA C230004F18 gene C230004F18Rik  
1445855\_at 1.03385 RIKEN cDNA A030007L17 gene A030007L17Rik  
1445856\_at 0.98542 RIKEN cDNA 6030443O07 gene 6030443O07Rik  
1445857\_at 1.04292 cDNA sequence BC026585 BC026585  
1445858\_at 1.09866 RIKEN cDNA 4933439G19 gene 4933439G19Rik  
1445859\_at 1.01527 B-cell CLL/lymphoma 9 Bcl9  
1445860\_at 0.95245 tetraspanin 11 Tspan11  
1445861\_at 1.22368 Ubiquitin specific peptidase 25 Usp25  
1445862\_at 1.87424 RIKEN cDNA 4921513D23 gene 4921513D23Rik  
1445863\_at 0.89692 RIKEN cDNA E030013G06 gene E030013G06Rik  
1445864\_at 0.94716 Transcribed locus ---  
1445865\_at 0.93390 --- ---  
1445866\_at 1.71653 microtubule associated serine/threonine kinase family member 4 Mast4  
1445867\_at 1.37488 expressed sequence AL023008 AL023008  
1445868\_at 0.98529 cytoplasmic polyadenylation element binding protein 3 Cpeb3  
1445869\_at 0.91502 Transmembrane protein 28 Tmem28  
1445870\_at 1.40481 CDC42 effector protein (Rho GTPase binding) 2 Cdc42ep2

|              |         |                                                                         |          |               |
|--------------|---------|-------------------------------------------------------------------------|----------|---------------|
| 1445871_at   | 0.98870 | expressed sequence                                                      | AI315376 | AI315376      |
| 1445872_at   | 0.93063 | "nuclear receptor subfamily 6, group A, member 1"                       |          | Nr6a1         |
| 1445873_at   | 1.28439 | Transcription factor Dp 2                                               | Tfdp2    |               |
| 1445874_at   | 1.04444 | RAR-related orphan receptor beta                                        |          | Rorb          |
| 1445875_at   | 0.95342 | RIKEN cDNA A230057D06                                                   | gene     | A230057D06Rik |
| 1445876_at   | 0.90279 | ---                                                                     | ---      |               |
| 1445877_at   | 1.01424 | expressed sequence                                                      | AI256775 | AI256775      |
| 1445878_at   | 0.93364 | RIKEN cDNA C920006O11                                                   | gene     | C920006O11Rik |
| 1445879_at   | 0.87894 | zinc finger protein 507                                                 | zfp507   |               |
| 1445880_at   | 1.06870 | Deleted in colorectal carcinoma                                         | Dcc      |               |
| 1445881_at   | 0.91087 | RIKEN cDNA 2310035P21                                                   | gene     | 2310035P21Rik |
| 1445882_at   | 0.84262 | CD300 antigen like family member B                                      |          | Cd300lb       |
| 1445883_at   | 0.96427 | RAN binding protein 2                                                   | Ranbp2   |               |
| 1445884_at   | 1.49066 | RIKEN cDNA 1110007A13                                                   | gene     | 1110007A13Rik |
| 1445885_at   | 1.71118 | ubiquitin-conjugating enzyme E2D 2                                      |          | Ube2d2        |
| 1445886_at   | 1.17450 | "ELK3, member of ETS oncogene family"                                   |          | Elk3          |
| 1445887_at   | 0.99211 | ---                                                                     | ---      |               |
| 1445888_x_at | 1.16034 | "poly (ADP-ribose) polymerase family, member 3"                         |          | Parp3         |
| 1445889_at   | 1.13768 | "Sortilin-related receptor, LDLR class A repeats-containing"            |          | Sorl1         |
| 1445890_at   | 0.94400 | RIKEN cDNA C230079E05                                                   | gene     | C230079E05Rik |
| 1445891_at   | 0.89053 | cDNA sequence AF529169                                                  | AF529169 |               |
| 1445892_at   | 1.01066 | Period homolog 2 (Drosophila)                                           |          | Per2          |
| 1445893_at   | 1.15136 | "procollagen-lysine, 2-oxoglutarate 5-dioxygenase 1"                    |          | Plod1         |
| 1445894_at   | 1.01774 | ---                                                                     | ---      |               |
| 1445895_at   | 0.92463 | "T-cell receptor beta, variable 8.2"                                    |          | Tcrb-V8.2     |
| 1445896_at   | 1.01104 | RIKEN cDNA 2810433D01                                                   | gene     | 2810433D01Rik |
| 1445897_s_at | 1.12850 | interferon-induced protein 35                                           |          | Ifi35         |
| 1445898_at   | 0.87394 | gamma-glutamyl carboxylase                                              |          | Ggcx          |
| 1445899_at   | 1.09675 | expressed sequence AA409289                                             | AA409289 |               |
| 1445900_at   | 1.17104 | "Kalirin, RhoGEF kinase"                                                |          | Kalrn         |
| 1445901_at   | 1.00217 | low density lipoprotein receptor-related protein 2                      |          | Lrp2          |
| 1445902_at   | 0.96642 | "Tetratricopeptide repeat, ankyrin repeat and coiled-coil containing 2" |          | Tanc2         |
| 1445903_at   | 1.12805 | ---                                                                     | ---      |               |
| 1445904_at   | 1.03274 | ---                                                                     | ---      |               |
| 1445905_at   | 0.85156 | expressed sequence C79206                                               | C79206   |               |
| 1445906_at   | 1.04601 | Zinc finger protein 35                                                  | Zfp35    |               |
| 1445907_at   | 1.02136 | ---                                                                     | ---      |               |
| 1445908_at   | 0.86415 | "Eukaryotic translation initiation factor 2B, subunit 5 epsilon"        |          | Eif2b5        |
| 1445909_at   | 0.91843 | ---                                                                     | ---      |               |
| 1445910_at   | 0.92476 | expressed sequence C79999                                               | C79999   |               |
| 1445911_at   | 1.00634 | Cysteine-rich hydrophobic domain 2                                      |          | Chic2         |
| 1445912_at   | 1.02022 | coiled-coil domain containing 60                                        |          | Ccdc60        |
| 1445913_at   | 0.86493 | RIKEN cDNA A730090H04                                                   | gene     | A730090H04Rik |

1445914\_at 1.61355 Nuclear respiratory factor 1 Nrf1  
1445915\_at 0.91348 "Histocompatibility 2, K1, K region" H2-K1  
1445916\_at 1.04355 "ATPase, H+ transporting, lysosomal V1 subunit A" Atp6v1a  
1445917\_at 1.09124 expressed sequence C81269 C81269  
1445918\_at 1.49464 Transmembrane protein 2 Tmem2  
1445919\_at 1.13474 expressed sequence AA409261 AA409261  
1445920\_at 0.92279 --- ---  
1445921\_at 0.96259 "DNA segment, Chr 2, ERATO Doi 397, expressed" D2Ertd397e  
1445922\_at 1.21507 X-ray repair complementing defective repair in Chinese hamster cells 4 Xrcc4  
1445923\_at 0.84862 RIKEN cDNA 1700055N04 gene 1700055N04Rik  
1445924\_at 0.89733 similar to RIKEN cDNA 1700029I01 LOC385211  
1445925\_at 0.87294 "DNA segment, Chr 15, ERATO Doi 492, expressed" D15Ertd492e  
1445926\_at 1.05658 --- ---  
1445927\_at 1.03533 "DNA segment, Chr 13, ERATO Doi 212, expressed" D13Ertd212e  
1445928\_at 1.59292 membrane-associated ring finger (C3HC4) 6 6-Mar  
1445929\_at 1.00566 "Potassium channel, subfamily K, member 2" Kcnk2  
1445930\_at 1.00344 fibronectin type III domain containing 7 Fndc7  
1445931\_at 0.98300 --- ---  
1445932\_at 0.89270 Cadherin EGF LAG seven-pass G-type receptor 1 Celsr1  
1445933\_at 1.10543 "solute carrier family 12, member 5" Slc12a5  
1445934\_at 1.14390 ariadne homolog 2 (Drosophila) /// similar to ariadne homolog 2 Arih2 ///  
LOC432565  
1445935\_at 0.99430 --- ---  
1445936\_at 1.09831 Superkiller viralicidic activity 2-like 2 (S. cerevisiae) Skiv2l2  
1445937\_at 0.99086 RIKEN cDNA A630001G21 gene A630001G21Rik  
1445938\_at 1.00315 RIKEN cDNA 5930427L02 gene 5930427L02Rik  
1445939\_at 0.99654 Mitochondrial tumor suppressor 1 Mtus1  
1445940\_at 1.39358 "DNA segment, Chr 4, ERATO Doi 298, expressed" D4Ertd298e  
1445941\_at 1.35164 AT motif binding factor 1 Atbf1  
1445942\_at 0.94866 expressed sequence AU015858 AU015858  
1445943\_at 1.07752 --- ---  
1445944\_at 0.89336 "solute carrier family 25 (mitochondrial carrier, adenine nucleotide translocator), member 5" Slc25a5  
1445945\_at 0.97133 expressed sequence AU021880 AU021880  
1445946\_at 0.88666 "Phosphodiesterase 4A, cAMP specific" Pde4a  
1445947\_at 1.18576 Kinesin 2 Kns2  
1445948\_at 0.96024 Transcribed locus ---  
1445949\_at 0.88934 "Tumor necrosis factor receptor superfamily, member 19" Tnfrsf19  
1445950\_at 0.90587 "cDNA sequence, C87926" C87926  
1445951\_at 1.00597 expressed sequence C86345 C86345  
1445952\_at 2.48664 "Membrane associated guanylate kinase, WW and PDZ domain containing 1" Magi1  
1445953\_at 0.86596 "DNA segment, Chr 17, ERATO Doi 191, expressed" D17Ertd191e

|            |         |                                                                 |               |
|------------|---------|-----------------------------------------------------------------|---------------|
| 1445954_at | 0.97343 | expressed sequence C81354                                       | C81354        |
| 1445955_at | 0.88072 | RIKEN cDNA 2400010G15 gene                                      | 2400010G15Rik |
| 1445956_at | 0.97824 | ---                                                             | ---           |
| 1445957_at | 1.55931 | Ena-vasodilator stimulated phosphoprotein                       | Evl           |
| 1445958_at | 0.94418 | Transcribed locus                                               | ---           |
| 1445959_at | 1.12659 | ---                                                             | ---           |
| 1445960_at | 0.97724 | ---                                                             | ---           |
| 1445961_at | 1.24649 | ---                                                             | ---           |
| 1445962_at | 0.97814 | "Glutamate receptor, ionotropic, AMPA2 (alpha 2)"               | Gria2         |
| 1445963_at | 1.00098 | "Phosphodiesterase 5A, cGMP-specific"                           | Pde5a         |
| 1445964_at | 1.01589 | ---                                                             | ---           |
| 1445965_at | 2.14048 | ---                                                             | ---           |
| 1445966_at | 2.04428 | Insulin-like growth factor 2 receptor                           | Igf2r         |
| 1445967_at | 0.95460 | expressed sequence AU022331                                     | AU022331      |
| 1445968_at | 0.96354 | Transmembrane and tetratricopeptide repeat containing 2         | Tmtc2         |
| 1445969_at | 1.04029 | Transcribed locus                                               | ---           |
| 1445970_at | 0.94630 | expressed sequence AU022526                                     | AU022526      |
| 1445971_at | 0.92119 | RIKEN cDNA 4933439F18 gene                                      | 4933439F18Rik |
| 1445972_at | 0.95158 | "Usher syndrome 2A (autosomal recessive, mild) homolog (human)" | Ush2a         |
| 1445973_at | 0.94362 | expressed sequence C79461                                       | C79461        |
| 1445974_at | 0.80943 | Transcribed locus                                               | ---           |
| 1445975_at | 1.01858 | ---                                                             | ---           |
| 1445976_at | 0.91362 | expressed sequence C80279                                       | C80279        |
| 1445977_at | 0.97109 | expressed sequence AU022793                                     | AU022793      |
| 1445978_at | 0.98259 | ---                                                             | ---           |
| 1445979_at | 0.95483 | Cyclin M1                                                       | Cnm1          |
| 1445980_at | 0.88405 | "Aldehyde dehydrogenase family 1, subfamily A1"                 | Aldh1a1       |
| 1445981_at | 0.97913 | ---                                                             | ---           |
| 1445982_at | 1.03050 | Glypican 6                                                      | Gpc6          |
| 1445983_at | 0.91856 | NF-kappaB repressing factor                                     | Nkrf          |
| 1445984_at | 1.82730 | PFTAIRE protein kinase 1                                        | Pftk1         |
| 1445985_at | 1.40863 | Traf3 interacting protein 2                                     | Traf3ip2      |
| 1445986_at | 1.07440 | expressed sequence C86195                                       | C86195        |
| 1445987_at | 1.13741 | Transcribed locus                                               | ---           |
| 1445988_at | 1.02543 | Interleukin 17D Il17d                                           |               |
| 1445989_at | 0.95400 | Transcribed locus                                               | ---           |
| 1445990_at | 1.06942 | expressed sequence AU020096                                     | AU020096      |
| 1445991_at | 0.83897 | Lipoma HMGIC fusion partner                                     | Lhfp          |
| 1445992_at | 0.97350 | Transcribed locus                                               | ---           |
| 1445993_at | 0.92536 | ---                                                             | ---           |
| 1445994_at | 0.90207 | ---                                                             | ---           |
| 1445995_at | 1.16070 | cell division cycle 25 homolog A (S. cerevisiae)                | Cdc25a        |
| 1445996_at | 0.92185 | Placenta specific 9                                             | Plac9         |

1445997\_at 0.99131 ets variant gene 3 Etv3  
1445998\_at 0.97082 "Protein kinase, cGMP-dependent, type I" Prkg1  
1445999\_at 1.19092 "DNA segment, Chr 19, ERATO Doi 132, expressed" D19Ertd132e  
1446000\_at 0.94873 Zinc finger protein 291 Zfp291  
1446001\_at 2.49587 RalBP1 associated Eps domain containing protein Repl  
1446002\_at 0.90967 "ATP-binding cassette, sub-family C (CFTR/MRP), member 1" Abcc1  
1446003\_at 0.83501 --- ---  
1446004\_at 0.96655 "ATPase, Cu++ transporting, beta polypeptide" Atp7b  
1446005\_at 0.82888 "DNA segment, Chr 2, ERATO Doi 337, expressed" D2Ertd337e  
1446006\_at 0.99509 IMP1 inner mitochondrial membrane peptidase-like (S. cerevisiae) Immp11  
1446007\_at 1.33846 Bone morphogenetic protein 1 Bmp1  
1446008\_at 1.07292 "DNA segment, Chr 3, ERATO Doi 246, expressed" D3Ertd246e  
1446009\_at 1.04034 Similar to Potassium voltage-gated channel subfamily G member 2 (Voltage-gated potassium channel subunit Kv6.2) (Cardiac potassium channel subunit) LOC240444  
1446010\_at 0.92391 similar to F-box only protein 34 /// similar to F-box only protein 34 /// similar to F-box only protein 34 LOC668019 /// LOC670109 /// LOC674275  
1446011\_at 0.96779 "Core 1 UDP-galactose:N-acetylgalactosamine-alpha-R beta 1,3-galactosyltransferase" C1galt1  
1446012\_at 1.15297 "Dystrobrevin, beta" Dtnb  
1446013\_at 1.04666 "solute carrier family 38, member 3" Slc38a3  
1446014\_at 1.22240 --- ---  
1446015\_at 1.03383 "Trafficking protein, kinesin binding 1" Trak1  
1446016\_at 1.01281 --- ---  
1446017\_at 1.03368 Transcribed locus ---  
1446018\_at 0.99406 expressed sequence C79240 C79240  
1446019\_at 1.08806 Transcribed locus ---  
1446020\_at 0.88753 --- ---  
1446021\_at 0.96399 expressed sequence AU018466 AU018466  
1446022\_at 1.04398 Musashi homolog 2 (Drosophila) Msi2  
1446023\_at 0.99572 Osteoclast stimulating factor 1 Ostf1  
1446024\_at 0.92838 --- ---  
1446025\_at 1.05115 Expressed sequence AI462493 AI462493  
1446026\_at 1.21909 Kinesin family member 13A Kif13a  
1446027\_at 0.91346 --- ---  
1446028\_at 0.97471 --- ---  
1446029\_at 1.57853 "Tetratricopeptide repeat, ankyrin repeat and coiled-coil containing 1" Tanc1  
1446030\_at 0.87027 Transcribed locus ---  
1446031\_at 0.93633 Thyroid hormone receptor associated protein 3 Thrsp3  
1446032\_at 1.02040 --- ---  
1446033\_at 0.93780 expressed sequence C87882 C87882  
1446034\_at 0.93990 "Adult male cortex cDNA, RIKEN full-length enriched library, clone: B530045B12 product:unclassifiable, full insert sequence" ---  
1446035\_at 0.94848 "PREDICTED: Mus musculus similar to Protein CXorf22 (LOC629131),

mRNA" ---

|            |                 |                                                                                                                            |
|------------|-----------------|----------------------------------------------------------------------------------------------------------------------------|
| 1446036_at | 0.97669 --- --- |                                                                                                                            |
| 1446037_at | 1.08356         | RIKEN cDNA C230081A13 gene C230081A13Rik                                                                                   |
| 1446038_at | 1.06051         | Heterogeneous nuclear ribonucleoprotein A1 Hnrpa1                                                                          |
| 1446039_at | 0.86509         | Transcribed locus ---                                                                                                      |
| 1446040_at | 0.84747         | RIKEN cDNA 2700049A03 gene 2700049A03Rik                                                                                   |
| 1446041_at | 0.99753         | Transcribed locus ---                                                                                                      |
| 1446042_at | 0.94304         | "PREDICTED: Mus musculus similar to preferentially expressed antigen in melanoma-like 3 (LOC621352), mRNA" ---             |
| 1446043_at | 1.10313         | expressed sequence C81086 C81086                                                                                           |
| 1446044_at | 0.92064         | expressed sequence AU015581 AU015581                                                                                       |
| 1446045_at | 0.90813         | expressed sequence AU024581 AU024581                                                                                       |
| 1446046_at | 0.92646         | CDNA sequence BC023818 BC023818                                                                                            |
| 1446047_at | 0.95195         | "RNA binding motif, single stranded interacting protein" Rbms3                                                             |
| 1446048_at | 0.96158 --- --- |                                                                                                                            |
| 1446049_at | 1.01212 --- --- |                                                                                                                            |
| 1446050_at | 1.16557         | "Membrane associated guanylate kinase, WW and PDZ domain containing 1" Magi1                                               |
| 1446051_at | 1.06398         | "gene model 1140, (NCBI)" Gm1140                                                                                           |
| 1446052_at | 1.02176 --- --- |                                                                                                                            |
| 1446053_at | 1.11131         | G patch domain and KOW motifs Gpkow                                                                                        |
| 1446054_at | 0.99525         | "Zinc metallopeptidase, STE24 homolog (S. cerevisiae)" Zmpste24                                                            |
| 1446055_at | 1.09241 --- --- |                                                                                                                            |
| 1446056_at | 1.14132 --- --- |                                                                                                                            |
| 1446057_at | 1.93592         | rearranged L-myc fusion sequence Rlf                                                                                       |
| 1446058_at | 0.84937         | "PREDICTED: Mus musculus hypothetical protein LOC628925 (LOC628925), mRNA" ---                                             |
| 1446059_at | 0.88814         | "ST6 (alpha-N-acetyl-neuraminy1-2,3-beta-galactosyl-1,3)-N-acetylgalactosaminide alpha-2,6-sialyltransferase 5" St6galnac5 |
| 1446060_at | 0.97738         | RIKEN cDNA 9230109A22 gene 9230109A22Rik                                                                                   |
| 1446061_at | 1.04165         | CDNA sequence BC042698 BC042698                                                                                            |
| 1446062_at | 0.97491         | RIKEN cDNA B830028B13 gene B830028B13Rik                                                                                   |
| 1446063_at | 0.87815         | RIKEN cDNA C730034F03 gene C730034F03Rik                                                                                   |
| 1446064_at | 0.99490 --- --- |                                                                                                                            |
| 1446065_at | 0.96779         | "Potassium voltage-gated channel, Shal-related family, member 2" Kcnd2                                                     |
| 1446066_at | 0.87083         | "zinc finger, CCHC domain containing 17" Zcchc17                                                                           |
| 1446067_at | 1.06919         | Piwi-like homolog 2 (Drosophila) Piwil2                                                                                    |
| 1446068_at | 1.23052         | adenosine kinase Adk                                                                                                       |
| 1446069_at | 1.03363         | "Actin binding LIM protein family, member 3" Ablim3                                                                        |
| 1446070_at | 1.01540         | tRNA-yW synthesizing protein 1 homolog (S. cerevisiae) Tyw1                                                                |
| 1446071_at | 1.23041         | six transmembrane epithelial antigen of prostate 2 Steap2                                                                  |
| 1446072_at | 1.08655 --- --- |                                                                                                                            |
| 1446073_at | 0.99233         | YY1 associated factor 2 Yaf2                                                                                               |

1446074\_at 0.96782 MOCO sulphurase C-terminal domain containing 1 Mosc1  
1446075\_at 1.14249 --- ---  
1446076\_at 0.93732 Transcribed locus ---  
1446077\_at 0.87251 RIKEN cDNA 4833446K15 gene 4833446K15Rik  
1446078\_at 0.91717 FK506 binding protein 7 Fkbp7  
1446079\_at 1.11336 "zinc finger, matrin type 2" Zmat2  
1446080\_at 1.04947 Cut-like 2 (Drosophila) Cutl2  
1446081\_at 1.06609 "Zinc finger, ZZ-type with EF hand domain 1" Zzef1  
1446082\_at 0.97540 "Jumonji, AT rich interactive domain 2" Jarid2  
1446083\_at 1.02576 Heterogeneous nuclear ribonucleoprotein D Hnrpd  
1446084\_at 1.03449 Nexilin Nexn  
1446085\_at 1.02724 Suppressor of cytokine signaling 2 Socs2  
1446086\_s\_at 0.88084 GLI-Kruppel family member GLI2 Gli2  
1446087\_at 0.96644 "Golgi autoantigen, golgin subfamily a, 1" Golga1  
1446088\_at 1.64009 RIKEN cDNA 9430081I23 gene 9430081I23Rik  
1446089\_at 1.07512 expressed sequence C86400 C86400  
1446090\_at 1.18543 "15 days embryo head cDNA, RIKEN full-length enriched library, clone:  
D930002E06 product:hypothetical protein, full insert sequence" ---  
1446091\_at 1.10300 "Acidic nuclear phosphoprotein 32 family, member B" Anp32b  
1446092\_at 0.88652 Transcribed locus ---  
1446093\_at 0.92600 --- ---  
1446094\_at 2.23695 AT motif binding factor 1 Atbf1  
1446095\_at 1.12991 antisense Igf2r RNA Air  
1446096\_at 1.17189 RIKEN cDNA 2310001H17 gene 2310001H17Rik  
1446097\_at 0.97898 Retinoblastoma binding protein 8 Rbbp8  
1446098\_at 1.07331 Zinc finger protein 407 Zfp407  
1446099\_at 1.11929 Methylenetetrahydrofolate dehydrogenase (NADP+ dependent) 1-like  
Mthfd11  
1446100\_at 0.98101 Transformation related protein 53 binding protein 1 Trp53bp1  
1446101\_at 1.15416 --- ---  
1446102\_at 1.21957 "DNA segment, Chr 9, ERATO Doi 292, expressed" D9Ertd292e  
1446103\_at 1.09199 "RAB8B, member RAS oncogene family" Rab8b  
1446104\_at 1.00566 SLIT-ROBO Rho GTPase activating protein 3 Srgap3  
1446105\_at 1.02722 exocyst complex component 1 Exoc1  
1446106\_at 0.99716 RIKEN cDNA 1700109G14 gene 1700109G14Rik  
1446107\_at 1.09627 "Serine/threonine kinase 24 (STE20 homolog, yeast)" Stk24  
1446108\_at 0.97408 "Ankyrin 2, brain" Ank2  
1446109\_at 1.00454 WD repeat and FYVE domain containing 3 Wdfy3  
1446110\_at 0.98113 "DNA segment, Chr 3, ERATO Doi 711, expressed" D3Ertd711e  
1446111\_at 1.01355 "DNA segment, Chr 14, ERATO Doi 611, expressed" D14Ertd611e  
1446112\_at 1.07846 Ubiquitin specific peptidase 34 Usp34  
1446113\_at 0.98927 --- ---  
1446114\_at 1.02751 Inositol polyphosphate-5-phosphatase A Inpp5a

1446115\_at 0.97074 --- ---  
1446116\_at 0.99998 RIKEN cDNA B230378P21 gene B230378P21Rik  
1446117\_at 1.13973 spire homolog 1 (Drosophila) Spire1  
1446118\_at 1.30223 "DNA segment, Chr 17, ERATO Doi 165, expressed" D17Ertd165e  
1446119\_at 1.01491 "Adult male hypothalamus cDNA, RIKEN full-length enriched library, clone:  
A230059N19 product:unclassifiable, full insert sequence" ---  
1446120\_at 1.01174 U2AF homology motif (UHM) kinase 1 Uhmk1  
1446121\_at 1.00297 Dorso-medial telencephalon gene 2 Dmt2  
1446122\_at 0.85021 RIKEN cDNA 4732416N19 gene 4732416N19Rik  
1446123\_at 1.01391 RIKEN cDNA B230396O12 gene B230396O12Rik  
1446124\_at 1.03774 --- ---  
1446125\_at 0.92646 --- ---  
1446126\_at 0.89881 Transcribed locus ---  
1446127\_at 1.53481 Zinc finger homeobox 1a Zfhx1a  
1446128\_at 0.93764 Early B-cell factor 2 Ebf2  
1446129\_at 1.24644 "RAB5A, member RAS oncogene family" Rab5a  
1446130\_at 0.92727 PCTAIRE-motif protein kinase 2 Pctk2  
1446131\_at 1.08490 --- ---  
1446132\_at 1.01368 --- ---  
1446133\_at 1.19005 "DNA segment, Chr 2, ERATO Doi 295, expressed" D2Ertd295e  
1446134\_at 0.94881 expressed sequence C78115 C78115  
1446135\_at 0.98385 RIKEN cDNA D030051J21 gene D030051J21Rik  
1446136\_at 0.92019 --- ---  
1446137\_at 0.93843 Glioblastoma amplified sequence Gbas  
1446138\_at 1.00638 Kinesin-associated protein 3 Kifap3  
1446139\_at 1.09484 Expressed sequence AI661453 AI661453  
1446140\_at 1.95936 Pericentriolar material 1 Pcm1  
1446141\_at 1.16327 "Transforming growth factor, beta 2" Tgfb2  
1446142\_at 0.92912 --- ---  
1446143\_at 1.26399 MYST histone acetyltransferase (monocytic leukemia) 3 Myst3  
1446144\_at 0.88271 peroxin 2 Pex2  
1446145\_at 0.95290 "eukaryotic translation initiation factor 4 gamma, 3" Eif4g3  
1446146\_at 1.57646 Gap junction membrane channel protein alpha 7 Gja7  
1446147\_at 2.47632 expressed sequence C79248 C79248  
1446148\_x\_at 2.47955 expressed sequence C79248 C79248  
1446149\_at 1.08436 "protein phosphatase 3, catalytic subunit, beta isoform" Ppp3cb  
1446150\_at 0.89989 "16 days embryo head cDNA, RIKEN full-length enriched library, clone:  
C130070I23 product:unclassifiable, full insert sequence" ---  
1446151\_at 0.91818 --- ---  
1446152\_at 1.20381 Longevity assurance homolog 6 (S. cerevisiae) Lass6  
1446153\_at 0.94967 Zinc finger protein 608 Zfp608  
1446154\_at 0.94975 "16 days neonate cerebellum cDNA, RIKEN full-length enriched library,  
clone:9630050E20 product:unclassifiable, full insert sequence" ---



1446155\_at 0.88149 RIKEN cDNA 2700089E24 gene 2700089E24Rik  
1446156\_at 0.89275 "Dystrophin, muscular dystrophy" Dmd  
1446157\_at 1.04347 RIKEN cDNA A330019N05 gene A330019N05Rik  
1446158\_at 1.25254 SEC15-like 2 (*S. cerevisiae*) Sec15l2  
1446159\_at 0.90170 p21 (CDKN1A)-activated kinase 7 Pak7  
1446160\_x\_at 1.06336 transmembrane protein 69 Tmem69  
1446161\_at 0.96276 "TAF11 RNA polymerase II, TATA box binding protein (TBP)-associated factor" Taf11  
1446162\_at 1.01463 "poly A binding protein, cytoplasmic 5" Pabpc5  
1446163\_at 1.05303 --- ---  
1446164\_at 1.24799 Nuclear receptor coactivator 6 interacting protein Ncoa6ip  
1446165\_at 0.92574 similar to fibrillarin LOC621312  
1446166\_at 1.08941 --- ---  
1446167\_at 1.89040 Homeodomain interacting protein kinase 2 Hipk2  
1446168\_at 1.10477 --- ---  
1446169\_at 1.12593 DiGeorge syndrome critical region gene 8 Dgcr8  
1446170\_at 0.80269 "ATP-binding cassette, sub-family C (CFTR/MRP), member 12" Abcc12  
1446171\_at 1.02197 RIKEN cDNA A230107N01 gene A230107N01Rik  
1446172\_at 1.43286 "Adult male urinary bladder cDNA, RIKEN full-length enriched library, clone:9530082M13 product:unclassifiable, full insert sequence" ---  
1446173\_at 0.97699 --- ---  
1446174\_at 0.97289 "similar to melanoma antigen family A, 10" LOC245440  
1446175\_at 0.81611 RIKEN cDNA 1700095A21 gene 1700095A21Rik  
1446176\_at 1.02991 Myeloid ecotropic viral integration site-related gene 1 Mrg1  
1446177\_at 0.95657 --- ---  
1446178\_at 2.14809 Bicaudal C homolog 1 (*Drosophila*) Bicc1  
1446179\_at 0.91765 RIKEN cDNA C030014K22 gene C030014K22Rik  
1446180\_at 0.92255 laminin B1 subunit 1 Lamb1-1  
1446181\_at 0.99839 expressed sequence C85699 C85699  
1446182\_at 1.53735 "Zinc finger, MYND domain containing 11" Zmynd11  
1446183\_at 1.20523 Amyotrophic lateral sclerosis 2 (juvenile) homolog (human) Als2  
1446184\_at 1.03908 --- ---  
1446185\_at 0.97344 FK506 binding protein 12-rapamycin associated protein 1 Frap1  
1446186\_at 1.11924 ubiquitin specific peptidase 15 Usp15  
1446187\_at 1.08279 RIKEN cDNA 4831416G18 gene 4831416G18Rik  
1446188\_at 1.07359 leucine-rich repeats and IQ motif containing 2 Lrriq2  
1446189\_at 0.91123 MYST histone acetyltransferase monocytic leukemia 4 Myst4  
1446190\_at 1.65303 doublecortin and calcium/calmodulin-dependent protein kinase-like 1 Dcamk1l  
1446191\_at 1.06833 "ABI gene family, member 3" Abi3  
1446192\_at 0.93522 Amphiphysin Amph  
1446193\_at 1.61704 --- ---  
1446194\_at 1.19910 "nuclear receptor subfamily 2, group C, member 1" Nr2c1

1446195\_at 0.99218 similar to WD repeat and SOCS box containing protein 2 (WSB-2) (SOCS box-containing WD protein SWiP-2) LOC632689  
 1446196\_at 1.17798 high mobility group AT-hook 2 Hmga2  
 1446197\_at 0.93853 Latrophilin 3 Lphn3  
 1446198\_at 0.82818 "Mesoderm induction early response 1, family member 3" Mier3  
 1446199\_at 0.98263 regulator of G-protein signaling 20 Rgs20  
 1446200\_at 1.04797 Deleted in colorectal carcinoma Dcc  
 1446201\_at 0.94477 RIKEN cDNA 9030420J04 gene 9030420J04Rik  
 1446202\_at 1.04976 Transcribed locus ---  
 1446203\_at 0.99099 "muskelin 1, intracellular mediator containing kelch motifs" Mkl1  
 1446204\_at 1.23542 RIKEN cDNA 8030451K01 gene 8030451K01Rik  
 1446205\_at 1.00916 "0 day neonate thymus cDNA, RIKEN full-length enriched library, clone: A430057L20 product:unclassifiable, full insert sequence" ---  
 1446206\_at 1.05966 RIKEN cDNA B230209C24 gene B230209C24Rik  
 1446207\_at 1.02517 "0 day neonate cerebellum cDNA, RIKEN full-length enriched library, clone: C230011O19 product:unclassifiable, full insert sequence" ---  
 1446208\_at 1.05698 Tudor domain containing 5 Tdrd5  
 1446209\_at 1.28840 ubiquitin specific peptidase 40 Usp40  
 1446210\_at 1.22491 --- ---  
 1446211\_at 1.00726 V-erb-a erythroblastic leukemia viral oncogene homolog 4 (avian) ErbB4  
 1446212\_at 0.83786 Dendritic cell protein GA17 Ga17  
 1446213\_at 1.03607 Myotubularin related protein 2 Mtmr2  
 1446214\_at 0.95575 RIKEN cDNA D430018E03 gene D430018E03Rik  
 1446215\_at 0.93684 "zinc finger homeobox 2, antisense" Zfx2as  
 1446216\_at 0.91289 "Adult male cecum cDNA, RIKEN full-length enriched library, clone:9130202G13 product:unclassifiable, full insert sequence" ---  
 1446217\_at 1.09101 hypothetical gene supported by AK036329 LOC433202  
 1446218\_at 0.97227 "protein tyrosine phosphatase, receptor type, f polypeptide (PTPRF), interacting protein (liprin), alpha 2" Ppfia2  
 1446219\_at 1.03934 RIKEN cDNA D930015E06 gene D930015E06Rik  
 1446220\_at 1.03593 "gene model 484, (NCBI)" Gm484  
 1446221\_at 0.97132 Elastin Eln  
 1446222\_at 1.23237 --- ---  
 1446223\_at 0.99698 "COX10 homolog, cytochrome c oxidase assembly protein, heme A: farnesyltransferase (yeast)" Cox10  
 1446224\_at 1.29253 HECT domain containing 2 Hectd2  
 1446225\_at 0.98367 Ssu72 RNA polymerase II CTD phosphatase homolog (yeast) Ssu72  
 1446226\_at 1.09392 "Fanconi anemia, complementation group B" Fancb  
 1446227\_at 0.95776 G protein-coupled receptor 180 Gpr180  
 1446228\_at 0.97821 "DNA segment, Chr 19, Wayne State University 12, expressed" D19Wsu12e  
 1446229\_at 1.08174 "16 days embryo head cDNA, RIKEN full-length enriched library, clone: C130045L17 product:unclassifiable, full insert sequence" ---  
 1446230\_at 0.97398 "Gene model 944, (NCBI)" Gm944

|            |         |                                                                                                                                        |               |             |
|------------|---------|----------------------------------------------------------------------------------------------------------------------------------------|---------------|-------------|
| 1446231_at | 1.00022 | Transcribed locus                                                                                                                      | ---           |             |
| 1446232_at | 0.99892 | Latent transforming growth factor beta binding protein 1                                                                               |               | Ltbp1       |
| 1446233_at | 0.90750 | "Adenosine deaminase, RNA-specific, B2"                                                                                                |               | Adarb2      |
| 1446234_at | 3.56919 | "Ubiquitously transcribed tetratricopeptide repeat gene, X chromosome"                                                                 |               | Utx         |
| 1446235_at | 1.94270 | cDNA sequence BC002199                                                                                                                 | BC002199      |             |
| 1446236_at | 1.04053 | RIKEN cDNA C230072F16 gene                                                                                                             | C230072F16Rik |             |
| 1446237_at | 0.74842 | A kinase (PRKA) anchor protein (yotiao) 9                                                                                              |               | Akap9       |
| 1446238_at | 0.97006 | RIKEN cDNA 4930431P03 gene                                                                                                             | 4930431P03Rik |             |
| 1446239_at | 1.12732 | RIKEN cDNA 4930444F02 gene                                                                                                             | 4930444F02Rik |             |
| 1446240_at | 1.20593 | Kinesin 2                                                                                                                              |               | Kns2        |
| 1446241_at | 0.94813 | "Adult male thymus cDNA, RIKEN full-length enriched library, clone:5830471B11 product:unclassifiable, full insert sequence"            | ---           |             |
| 1446242_at | 1.10434 | RIKEN cDNA 4930535B03 gene                                                                                                             | 4930535B03Rik |             |
| 1446243_at | 1.02882 | RIKEN cDNA 5830404H04 gene                                                                                                             | 5830404H04Rik |             |
| 1446244_at | 1.04167 | RIKEN cDNA 2810482G21 gene                                                                                                             | 2810482G21Rik |             |
| 1446245_at | 2.82500 | Formin-like 2                                                                                                                          |               | Fmnl2       |
| 1446246_at | 0.89197 | "gene model 438, (NCBI)"                                                                                                               |               | Gm438       |
| 1446247_at | 0.95343 | "a disintegrin-like and metallopeptidase (reprolysin type) with thrombospondin type 1 motif, 18"                                       |               | Adamts18    |
| 1446248_at | 0.97378 | "solute carrier family 18 (vesicular monoamine), member 1"                                                                             |               | Slc18a1     |
| 1446249_at | 1.08916 | Anthrax toxin receptor 2                                                                                                               |               | Antxr2      |
| 1446250_at | 0.93991 | peroxisome proliferator activated receptor binding protein                                                                             |               | Pparbp      |
| 1446251_at | 0.93276 | hypothetical protein 4930565A17                                                                                                        | 4930565A17    |             |
| 1446252_at | 0.95958 | "Adult retina cDNA, RIKEN full-length enriched library, clone:A930029I05 product:unclassifiable, full insert sequence"                 | ---           |             |
| 1446253_at | 1.06923 | "Adult male medulla oblongata cDNA, RIKEN full-length enriched library, clone:6330445G12 product:unclassifiable, full insert sequence" | ---           |             |
| 1446254_at | 1.02980 | DEP domain containing 6                                                                                                                |               | Depdc6      |
| 1446255_at | 1.04424 | "Potassium voltage-gated channel, subfamily Q, member 1"                                                                               |               | Kcnq1       |
| 1446256_at | 0.96905 | ---                                                                                                                                    | ---           |             |
| 1446257_at | 1.08842 | heparan sulfate 6-O-sulfotransferase 2                                                                                                 |               | Hs6st2      |
| 1446258_at | 1.17720 | "Syntrophin, basic 1"                                                                                                                  |               | Sntb1       |
| 1446259_at | 1.18446 | ---                                                                                                                                    | ---           |             |
| 1446260_at | 1.01814 | Six6 opposite strand transcript 1                                                                                                      |               | Six6os1     |
| 1446261_at | 0.90100 | "DNA segment, Chr 1, ERATO Doi 507, expressed"                                                                                         |               | D1Ertd507e  |
| 1446262_at | 1.20540 | "Acyl-Coenzyme A dehydrogenase family, member 10"                                                                                      |               | Acad10      |
| 1446263_at | 0.98470 | expressed sequence AU015619                                                                                                            | AU015619      |             |
| 1446264_at | 1.04725 | ---                                                                                                                                    | ---           |             |
| 1446265_at | 1.02755 | dynamamin 3                                                                                                                            |               | Dnm3        |
| 1446266_at | 1.02737 | cathepsin 8                                                                                                                            |               | Cts8        |
| 1446267_at | 0.96347 | "DNA segment, Chr 17, ERATO Doi 657, expressed"                                                                                        |               | D17Ertd657e |
| 1446268_at | 0.84710 | "Pleckstrin homology, Sec7 and coiled-coil domains 3"                                                                                  |               | Pscd3       |
| 1446269_at | 1.05224 | high mobility group box transcription factor 1                                                                                         |               | Hbp1        |

|            |         |                                                                                                                                           |               |
|------------|---------|-------------------------------------------------------------------------------------------------------------------------------------------|---------------|
| 1446270_at | 0.96234 | RIKEN cDNA E030042O20 gene                                                                                                                | E030042O20Rik |
| 1446271_at | 1.03722 | ---                                                                                                                                       | ---           |
| 1446272_at | 1.13633 | PCTAIRE-motif protein kinase 2                                                                                                            | Pctk2         |
| 1446273_at | 0.97664 | CUB and Sushi multiple domains 1                                                                                                          | Csmd1         |
| 1446274_at | 0.86427 | "solute carrier family 16 (monocarboxylic acid transporters), member 1"                                                                   | Slc16a1       |
| 1446275_at | 0.83272 | Trinucleotide repeat containing 15                                                                                                        | Tnrc15        |
| 1446276_at | 1.45885 | RIKEN cDNA 2310008H04 gene                                                                                                                | 2310008H04Rik |
| 1446277_at | 0.87107 | ---                                                                                                                                       | ---           |
| 1446278_at | 1.95483 | "Ubiquitously transcribed tetratricopeptide repeat gene, X chromosome"                                                                    | Utx           |
| 1446279_at | 0.92733 | Neuronal growth regulator 1                                                                                                               | Negr1         |
| 1446280_at | 1.30293 | Forkhead box P1                                                                                                                           | Foxp1         |
| 1446281_at | 0.94107 | RIKEN cDNA C530008M07 gene                                                                                                                | C530008M07Rik |
| 1446282_at | 1.08101 | hypothetical protein LOC626082                                                                                                            | LOC626082     |
| 1446283_at | 0.84103 | Dedicator of cytokinesis 4                                                                                                                | Dock4         |
| 1446284_at | 2.45921 | metastasis suppressor 1                                                                                                                   | Mtss1         |
| 1446285_at | 0.95276 | RIKEN cDNA A130034M23 gene                                                                                                                | A130034M23Rik |
| 1446286_at | 1.03216 | "16 days neonate cerebellum cDNA, RIKEN full-length enriched library, clone:9630014E16 product:unclassifiable, full insert sequence"      | ---           |
| 1446287_at | 1.01238 | RIKEN cDNA 4931440B09 gene                                                                                                                | 4931440B09Rik |
| 1446288_at | 1.32127 | expressed sequence C78692                                                                                                                 | C78692        |
| 1446289_at | 1.05749 | "Serine/threonine kinase 3 (Ste20, yeast homolog)"                                                                                        | Stk3          |
| 1446290_at | 1.15983 | RIKEN cDNA 2410129H14 gene                                                                                                                | 2410129H14Rik |
| 1446291_at | 0.82593 | RIKEN cDNA 9330175H22 gene                                                                                                                | 9330175H22Rik |
| 1446292_at | 1.06880 | Spermatogenesis associated 5                                                                                                              | Spata5        |
| 1446293_at | 0.89791 | B-cell CLL/lymphoma 11A (zinc finger protein)                                                                                             | Bcl11a        |
| 1446294_at | 1.13105 | Transcribed locus                                                                                                                         | ---           |
| 1446295_at | 1.14035 | tripartite motif protein 24                                                                                                               | Trim24        |
| 1446296_at | 0.88315 | RIKEN cDNA 4631422O05 gene                                                                                                                | 4631422O05Rik |
| 1446297_at | 0.99695 | 3-hydroxyisobutyrate dehydrogenase                                                                                                        | Hibadh        |
| 1446298_at | 1.01337 | RIKEN cDNA C630016I17 gene                                                                                                                | C630016I17Rik |
| 1446299_at | 1.34240 | RIKEN cDNA 6720456B07 gene                                                                                                                | 6720456B07Rik |
| 1446300_at | 0.95756 | "Adult male epididymis cDNA, RIKEN full-length enriched library, clone:9230007L17 product:unclassifiable, full insert sequence"           | ---           |
| 1446301_at | 1.00703 | "Phenylalanine-tRNA synthetase-like, alpha subunit"                                                                                       | Farsla        |
| 1446302_at | 0.90597 | Cysteine conjugate-beta lyase 1                                                                                                           | Ccbl1         |
| 1446303_at | 1.64229 | insulin-like growth factor I receptor                                                                                                     | Igf1r         |
| 1446304_at | 1.04485 | ---                                                                                                                                       | ---           |
| 1446305_at | 0.92207 | "Adult male corpora quadrigemina cDNA, RIKEN full-length enriched library, clone:B230216H12 product:unclassifiable, full insert sequence" | ---           |
| 1446306_at | 0.89090 | ---                                                                                                                                       | ---           |
| 1446307_at | 1.07252 | Poly(A) polymerase gamma                                                                                                                  | Papolg        |
| 1446308_at | 0.98476 | RIKEN cDNA 1700106J16 gene                                                                                                                | 1700106J16Rik |
| 1446309_at | 1.02235 | RIKEN cDNA 5830483C08 gene                                                                                                                | 5830483C08Rik |

|            |         |                                                              |               |
|------------|---------|--------------------------------------------------------------|---------------|
| 1446310_at | 0.92080 | RIKEN cDNA C130053K05 gene                                   | C130053K05Rik |
| 1446311_at | 0.87380 | membrane bound C2 domain containing protein                  | Mbc2          |
| 1446312_at | 1.10779 | ---                                                          | ---           |
| 1446313_at | 0.96625 | zinc finger protein 30                                       | Zfp30         |
| 1446314_at | 1.13822 | RIKEN cDNA A330041C17 gene                                   | A330041C17Rik |
| 1446315_at | 0.94485 | ATP citrate lyase                                            | Acly          |
| 1446316_at | 1.00900 | Lipin 2                                                      | Lpin2         |
| 1446317_at | 0.97501 | AT rich interactive domain 4B (Rbp1 like)                    | Arid4b        |
| 1446318_at | 1.78541 | "Solute carrier family 44, member 1"                         | Slc44a1       |
| 1446319_at | 1.14389 | ankyrin repeat and SOCS box-containing protein 7             | Asb7          |
| 1446320_at | 1.02506 | RIKEN cDNA 2310010I16 gene                                   | 2310010I16Rik |
| 1446321_at | 1.04953 | RIKEN cDNA B230208B08 gene                                   | B230208B08Rik |
| 1446322_at | 1.07150 | expressed sequence C78568                                    | C78568        |
| 1446323_at | 1.05542 | ---                                                          | ---           |
| 1446324_at | 0.98798 | "Calcium channel, voltage-dependent, alpha2/delta subunit 1" | Cacna2d1      |
| 1446325_at | 0.88032 | Prenylcysteine oxidase 1                                     | Pcyox1        |
| 1446326_at | 1.01713 | "procollagen, type I, alpha 2"                               | Colla2        |
| 1446327_at | 0.87328 | ---                                                          | ---           |
| 1446328_at | 1.08041 | Transcribed locus                                            | ---           |
| 1446329_at | 1.20704 | ---                                                          | ---           |
| 1446330_at | 1.28803 | ---                                                          | ---           |
| 1446331_at | 0.93564 | prostaglandin F receptor                                     | Ptgfr         |
| 1446332_at | 0.96146 | "Protocadherin gamma subfamily C, 3"                         | Pcdhgc3       |
| 1446333_at | 1.09830 | ---                                                          | ---           |
| 1446334_at | 1.01146 | ---                                                          | ---           |
| 1446335_at | 1.15267 | CDNA sequence BC013481                                       | BC013481      |
| 1446336_at | 1.15674 | ---                                                          | ---           |
| 1446337_at | 0.98441 | Huntington disease gene homolog                              | Hdh           |
| 1446338_at | 1.06116 | ---                                                          | ---           |
| 1446339_at | 0.95417 | PDZ and LIM domain 5                                         | Pdlim5        |
| 1446340_at | 1.01874 | Androgen receptor                                            | Ar            |
| 1446341_at | 0.87078 | RIKEN cDNA 6030403N03 gene                                   | 6030403N03Rik |
| 1446342_at | 1.00550 | RIKEN cDNA 2310001H17 gene                                   | 2310001H17Rik |
| 1446343_at | 0.92927 | Transcribed locus                                            | ---           |
| 1446344_at | 0.87245 | nyctalopin                                                   | Nyx           |
| 1446345_at | 1.73107 | ---                                                          | ---           |
| 1446346_at | 1.22068 | ---                                                          | ---           |
| 1446347_at | 1.01348 | RIKEN cDNA 4631405J19 gene                                   | 4631405J19Rik |
| 1446348_at | 1.03866 | Mitogen-activated protein kinase kinase kinase 5             | Map4k5        |
| 1446349_at | 0.92370 | zinc finger protein 78                                       | Zfp78         |
| 1446350_at | 0.89002 | Integrin alpha 4                                             | Itga4         |
| 1446351_at | 1.09821 | hypothetical protein D430034N21                              | D430034N21    |
| 1446352_at | 0.87743 | RIKEN cDNA 2410016O06 gene                                   | 2410016O06Rik |

|            |         |                                                                                                                                     |               |
|------------|---------|-------------------------------------------------------------------------------------------------------------------------------------|---------------|
| 1446353_at | 0.94945 | "Tubulin, beta 6"                                                                                                                   | Tubb6         |
| 1446354_at | 0.91907 | RIKEN cDNA C130098B18 gene                                                                                                          | C130098B18Rik |
| 1446355_at | 1.06144 | RIKEN cDNA 9530085L11 gene                                                                                                          | 9530085L11Rik |
| 1446356_at | 1.03444 | "Protein phosphatase 2, regulatory subunit B (B56), epsilon isoform"                                                                | Ppp2r5e       |
| 1446357_at | 1.04785 | cDNA sequence BC020402                                                                                                              | BC020402      |
| 1446358_at | 0.99347 | Brain-specific angiogenesis inhibitor 3                                                                                             | Bai3          |
| 1446359_at | 0.94833 | "guanine nucleotide binding protein, alpha stimulating, olfactory type"                                                             | Gnal          |
| 1446360_at | 0.99423 | RAR-related orphan receptor alpha                                                                                                   | Rora          |
| 1446361_at | 0.90943 | G protein-coupled receptor kinase 5                                                                                                 | Gprk5         |
| 1446362_at | 0.97354 | ---                                                                                                                                 | ---           |
| 1446363_at | 0.99367 | ---                                                                                                                                 | ---           |
| 1446364_at | 1.07690 | WW domain containing E3 ubiquitin protein ligase 1                                                                                  | Wwp1          |
| 1446365_at | 2.20958 | vesicle transport through interaction with t-SNAREs homolog 1A (yeast)                                                              | Vti1a         |
| 1446366_at | 0.92098 | "transient receptor potential cation channel, subfamily C, member 4"                                                                | Trpc4         |
| 1446367_at | 1.09074 | "0 day neonate cerebellum cDNA, RIKEN full-length enriched library, clone: C230077G16 product:unclassifiable, full insert sequence" | ---           |
| 1446368_at | 1.03662 | RIKEN cDNA 9130221J18 gene                                                                                                          | 9130221J18Rik |
| 1446369_at | 0.89624 | armadillo repeat containing 1                                                                                                       | Armc1         |
| 1446370_at | 0.97437 | RAB11 family interacting protein 4 (class II)                                                                                       | Rab11fip4     |
| 1446371_at | 1.07013 | ---                                                                                                                                 | ---           |
| 1446372_at | 1.17332 | "CD8 antigen, beta chain 1"                                                                                                         | Cd8b1         |
| 1446373_at | 0.90265 | LPS-responsive beige-like anchor                                                                                                    | Lrba          |
| 1446374_at | 1.17311 | Rho guanine nucleotide exchange factor (GEF) 10                                                                                     | Arhgef10      |
| 1446375_at | 0.93665 | Exocyst complex component 6                                                                                                         | Exoc6         |
| 1446376_at | 0.96007 | "ribosomal protein S6 kinase, polypeptide 1"                                                                                        | Rps6kb1       |
| 1446377_at | 0.97322 | fibulin 5                                                                                                                           | Fbln5         |
| 1446378_at | 1.01580 | "DNA segment, Chr 2, ERATO Doi 357, expressed"                                                                                      | D2Ertd357e    |
| 1446379_at | 1.06742 | expressed sequence C79296                                                                                                           | C79296        |
| 1446380_at | 1.02446 | RIKEN cDNA 9430076C15 gene                                                                                                          | 9430076C15Rik |
| 1446381_at | 1.01107 | CDNA sequence BC030499                                                                                                              | BC030499      |
| 1446382_at | 1.05414 | "0 day neonate cerebellum cDNA, RIKEN full-length enriched library, clone: C230094E06 product:unclassifiable, full insert sequence" | ---           |
| 1446383_at | 2.34244 | Ephrin A5                                                                                                                           | Efna5         |
| 1446384_at | 0.94472 | RIKEN cDNA B230339M05 gene                                                                                                          | B230339M05Rik |
| 1446385_at | 0.97585 | RIKEN cDNA 9430083A17 gene                                                                                                          | 9430083A17Rik |
| 1446386_at | 0.95725 | Transcription factor 4                                                                                                              | Tcf4          |
| 1446387_at | 1.11137 | ---                                                                                                                                 | ---           |
| 1446388_at | 0.96309 | Testis expressed gene 9                                                                                                             | Tex9          |
| 1446389_at | 1.00057 | Nuclear receptor interacting protein 1                                                                                              | Nrip1         |
| 1446390_at | 0.97601 | "ELK1, member of ETS oncogene family"                                                                                               | Elk1          |
| 1446391_at | 0.98904 | "Synuclein, alpha"                                                                                                                  | Snca          |
| 1446392_at | 0.85311 | Slit homolog 2 (Drosophila)                                                                                                         | Slit2         |
| 1446393_at | 1.07594 | "DNA segment, Chr 5, ERATO Doi 159, expressed"                                                                                      | D5Ertd159e    |

1446394\_at 1.05988 "opioid receptor, kappa 1" Oprk1  
1446395\_at 1.03022 Roundabout homolog 2 (Drosophila) Robo2  
1446396\_at 0.93279 Angiopoietin-like 1 Angptl1  
1446397\_at 1.82175 Nucleoporin 98 Nup98  
1446398\_at 0.81324 hypothetical gene supported by AK028463 LOC433197  
1446399\_at 0.97206 cadherin 10 Cdh10  
1446400\_at 1.10649 olfactory receptor 558 Olfr558  
1446401\_at 1.04416 Attractin like 1 Atrnl1  
1446402\_at 0.90006 --- ---  
1446403\_at 1.10248 expressed sequence AU022899 AU022899  
1446404\_at 1.04691 --- ---  
1446405\_at 1.15941 MYST histone acetyltransferase (monocytic leukemia) 3 Myst3  
1446406\_at 1.00030 Progesterone and adipoQ receptor family member VIII Paqr8  
1446407\_at 1.19936 "Myb-like, SWIRM and MPN domains 1" Mysm1  
1446408\_at 1.01452 Homeo box A10 Hoxa10  
1446409\_at 1.08425 glycosyltransferase-like domain containing 1 Gtdc1  
1446410\_at 1.16406 Choline/ethanolaminephosphotransferase 1 Cept1  
1446411\_at 0.86546 RIKEN cDNA 9630020C08 gene 9630020C08Rik  
1446412\_at 2.23365 WW domain-containing oxidoreductase Wwox  
1446413\_at 0.85640 RIKEN cDNA 4930555G07 gene 4930555G07Rik  
1446414\_at 1.13990 RIKEN cDNA 0910001A06 gene 0910001A06Rik  
1446415\_at 0.83789 heme binding protein 2 Hebp2  
1446416\_at 1.00873 sulfatase 1 Sulfl  
1446417\_at 1.62356 "Serine (or cysteine) peptidase inhibitor, clade B, member 6a" Serpinb6a  
1446418\_at 1.00107 Autophagy-related 7 (yeast) Atg7  
1446419\_at 1.09672 --- ---  
1446420\_at 0.91232 Plexin A2 Plxna2  
1446421\_at 2.43550 Schwannomin interacting protein 1 Schip1  
1446422\_at 1.02627 Membrane-associated ring finger (C3HC4) 3 3-Mar  
1446423\_at 1.17830 RAD51-like 1 (S. cerevisiae) Rad511  
1446424\_at 0.90000 "dynein, axonemal, heavy chain 12" Dnahc12  
1446425\_at 1.03252 RIKEN cDNA 4732418C07 gene 4732418C07Rik  
1446426\_at 2.47736 Enabled homolog (Drosophila) Enah  
1446427\_at 1.31986 RIKEN cDNA B230118G17 gene B230118G17Rik  
1446428\_at 1.17249 RIKEN cDNA D530005L17 gene D530005L17Rik  
1446429\_at 0.93275 "purinergic receptor P2X, ligand-gated ion channel 4" P2rx4  
1446430\_at 0.99980 HECT domain containing 2 Hectd2  
1446431\_at 0.93656 Dynamin 3 Dnm3  
1446432\_at 1.02085 RIKEN cDNA B530045E10 gene B530045E10Rik  
1446433\_at 1.18216 acyl-Coenzyme A binding domain containing 5 Acbd5  
1446434\_at 1.26270 Chondroitin sulfate GalNAcT-2 Galnact2  
1446435\_at 1.05680 "0 day neonate eyeball cDNA, RIKEN full-length enriched library, clone:  
E130016A22 product:hypothetical protein, full insert sequence" ---

1446436\_at 0.97254 Recombining binding protein suppressor of hairless (Drosophila) Rbpsuh  
1446437\_at 1.00555 RIKEN cDNA 9630028H03 gene 9630028H03Rik  
1446438\_at 0.96895 ubiquitin protein ligase E3 component n-recognin 1 Ubr1  
1446439\_at 1.08384 RNA polymerase 1-4 Rpo1-4  
1446440\_at 0.96431 CDNA clone IMAGE:40051559 ---  
1446441\_at 0.90809 "solute carrier family 20, member 1" Slc20a1  
1446442\_at 0.85031 RNA (guanine-7-) methyltransferase Rnmt  
1446443\_at 1.17303 RIKEN cDNA B230213L16 gene B230213L16Rik  
1446444\_at 1.56524 membrane associated DNA binding protein Mnab  
1446445\_at 0.93493 "12 days embryo spinal ganglion cDNA, RIKEN full-length enriched library,  
clone:D130018F08 product:unclassifiable, full insert sequence" ---  
1446446\_at 1.02977 RAN binding protein 10 Ranbp10  
1446447\_at 1.07324 RIKEN cDNA 4921537D05 gene 4921537D05Rik  
1446448\_at 1.16970 protein inhibitor of activated STAT 1 Pias1  
1446449\_at 0.91707 kelch-like 21 (Drosophila) Khl21  
1446450\_at 1.06789 Titin Ttn  
1446451\_at 1.17112 --- ---  
1446452\_at 2.00271 "Transcription factor 7-like 2, T-cell specific, HMG-box" Tcf7l2  
1446453\_at 1.13328 --- ---  
1446454\_at 0.95706 --- ---  
1446455\_at 0.89410 Transcribed locus ---  
1446456\_at 1.02297 "0 day neonate eyeball cDNA, RIKEN full-length enriched library, clone:  
E130003J08 product:unclassifiable, full insert sequence" ---  
1446457\_at 1.06006 DEAD (Asp-Glu-Ala-Asp) box polypeptide 58 Ddx58  
1446458\_at 0.84844 "ribonuclease L (2', 5'-oligoadenylate synthetase-dependent)" Rnasel  
1446459\_at 0.95224 --- ---  
1446460\_at 0.86283 transmembrane protein 61 Tmem61  
1446461\_at 1.20390 SRY-box containing gene 5 Sox5  
1446462\_at 0.91880 Histidyl tRNA synthetase 2 Hars2  
1446463\_at 0.87366 CDNA sequence BC024969 BC024969  
1446464\_at 1.09687 "Proteasome (prosome, macropain) activator subunit 4" Psme4  
1446465\_at 0.94397 "ATPase, H+ transporting, lysosomal V1 subunit B2" Atp6v1b2  
1446466\_at 0.94844 "Mannose receptor, C type 2" Mrc2  
1446467\_at 0.89447 "ATPas, class II, type 9B" Atp9b  
1446468\_at 0.95588 CUB and Sushi multiple domains 1 /// similar to CUB and Sushi multiple  
domains 1 Csm1 /// LOC670210  
1446469\_at 0.99776 hypothetical protein A030008J09 A030008J09  
1446470\_at 0.88108 --- ---  
1446471\_at 0.84101 --- ---  
1446472\_at 1.55949 AT hook containing transcription factor 1 Ahctf1  
1446473\_at 1.07873 --- ---  
1446474\_at 1.36251 --- ---  
1446475\_at 1.43065 Muscleblind-like 2 Mbnl2



1446476\_at 0.88596 RIKEN cDNA A430107P09 gene A430107P09Rik  
1446477\_at 1.09053 zinc finger protein 622 Zfp622  
1446478\_at 0.97124 RIKEN cDNA D130067I03 gene D130067I03Rik  
1446479\_at 1.07321 TNNI3 interacting kinase Tnni3k  
1446480\_at 0.95969 "DNA segment, Chr 8, ERATO Doi 82, expressed" D8Ertd82e  
1446481\_at 2.65941 "Amyloid beta (A4) precursor protein-binding, family B, member 2" Apbb2  
1446482\_at 1.00241 centrosomal protein 63 Cep63  
1446483\_at 1.13968 "aldo-keto reductase family 1, member E1" Akr1e1  
1446484\_at 0.91384 Myocyte enhancer factor 2C Mef2c  
1446485\_at 0.94680 RIKEN cDNA 4930553C11 gene 4930553C11Rik  
1446486\_at 1.22806 DTW domain containing 2 Dtw2  
1446487\_at 0.91514 --- ---  
1446488\_at 0.87262 Poliovirus receptor-related 1 Pvr1  
1446489\_at 1.35811 Suppressor of fused homolog (Drosophila) Sufu  
1446490\_at 1.10399 Polypyrimidine tract binding protein 2 Ptbp2  
1446491\_at 0.96245 "Guanine nucleotide binding protein, alpha stimulating, olfactory type" Gnal  
1446492\_at 1.08844 transmembrane protein 132D Tmem132d  
1446493\_at 0.92756 CDC14 cell division cycle 14 homolog A (S. cerevisiae) Cdc14a  
1446494\_at 1.12091 "Non-coding RNA Kis2-T1 mRNA, complete sequence, alternatively spliced"  
---  
1446495\_at 1.08439 --- ---  
1446496\_at 1.09665 "splicing factor, arginine/serine-rich 10 (transformer 2 homolog, Drosophila)"  
Sfrs10  
1446497\_at 1.23771 Neuron navigator 1 Nav1  
1446498\_at 0.83324 "interleukin 20 receptor, alpha" Il20ra  
1446499\_at 1.05931 Fas (TNFRSF6)-associated via death domain Fadd  
1446500\_at 1.09492 "LysM, putative peptidoglycan-binding, domain containing 4" Lysmd4  
1446501\_at 0.97171 RIKEN cDNA A830053O21 gene A830053O21Rik  
1446502\_at 1.10020 --- ---  
1446503\_at 0.88364 --- ---  
1446504\_at 1.11720 --- ---  
1446505\_at 1.02965 CD84 antigen Cd84  
1446506\_at 1.14080 hypothetical protein B930041G04 B930041G04  
1446507\_at 1.32920 Prion protein Prnp  
1446508\_at 1.85667 --- ---  
1446509\_at 0.97705 spermine oxidase Smox  
1446510\_at 1.71733 Pleckstrin homology domain interacting protein Phip  
1446511\_at 1.34069 mutS homolog 3 (E. coli) Msh3  
1446512\_at 1.30428 RIKEN cDNA 2610312B22 gene 2610312B22Rik  
1446513\_at 0.95953 "A disintegrin-like and metallopeptidase (reprolysin type) with thrombospondin  
type 1 motif, 19" Adamts19  
1446514\_at 0.94531 Dipeptidylpeptidase 10 Dpp10  
1446515\_at 0.94334 Janus kinase 3 Jak3

1446516\_at 0.90561 B-cell CLL/lymphoma 7C Bcl7c  
1446517\_at 1.03912 Carbonic anhydrase 12 Car12  
1446518\_at 1.04200 Rho-associated coiled-coil forming kinase 1 Rock1  
1446519\_at 1.02321 RIKEN cDNA A730091E23 gene A730091E23Rik  
1446520\_at 0.85826 interleukin 1 receptor accessory protein-like 2 Il1rapl2  
1446521\_at 2.28892 "Proteasome (prosome, macropain) 26S subunit, non-ATPase, 14" Psmd14  
1446522\_at 0.99765 --- ---  
1446523\_at 1.05504 --- ---  
1446524\_at 1.17476 "PREDICTED: Mus musculus similar to HYPOTHETICAL PROTEIN ORF-1137 (LOC626631), mRNA" ---  
1446525\_at 1.03180 Glypican 3 Gpc3  
1446526\_at 1.00135 RIKEN cDNA 9330199F22 gene 9330199F22Rik  
1446527\_at 0.92825 "angiotensin II receptor, type 1b" Agtr1b  
1446528\_at 1.00331 SCY1-like 2 (S. cerevisiae) Scyl2  
1446529\_at 1.60295 RIKEN cDNA 1200003I07 gene 1200003I07Rik  
1446530\_at 1.10895 --- ---  
1446531\_at 0.96605 --- ---  
1446532\_at 1.02416 --- ---  
1446533\_at 0.74024 CREB regulated transcription coactivator 1 Crtc1  
1446534\_at 0.95429 --- ---  
1446535\_at 1.02628 Collectin sub-family member 12 Colec12  
1446536\_at 0.99100 "sema domain, transmembrane domain (TM), and cytoplasmic domain, (semaphorin) 6D" Sema6d  
1446537\_at 1.09371 Dendritic cell protein GA17 Ga17  
1446538\_at 1.11120 Karyopherin (importin) alpha 3 Kpna3  
1446539\_at 0.84489 "Inositol polyphosphate-4-phosphatase, type II" Inpp4b  
1446540\_at 1.10357 "15 days embryo head cDNA, RIKEN full-length enriched library, clone: D930047B11 product:unclassifiable, full insert sequence" ---  
1446541\_at 0.90363 RIKEN cDNA 4930434E21 gene 4930434E21Rik  
1446542\_at 0.93751 acyl-CoA synthetase short-chain family member 2 Acss2  
1446543\_at 1.27918 GCN1 general control of amino-acid synthesis 1-like 1 (yeast) Gcn111  
1446544\_at 0.87654 Aryl hydrocarbon receptor nuclear translocator-like Arntl  
1446545\_at 1.01097 Spectrin beta 2 Spnb2  
1446546\_at 0.93247 "trimethyllysine hydroxylase, epsilon" Tmlhe  
1446547\_at 0.84597 RIKEN cDNA 9330175E14 gene 9330175E14Rik  
1446548\_at 1.11319 Glioma tumor suppressor candidate region gene 1 Gltscr1  
1446549\_at 0.89609 Kelch repeat and BTB (POZ) domain containing 11 Kbtbd11  
1446550\_at 1.24924 G1 to S phase transition 1 Gspt1  
1446551\_at 1.10127 "Mammary gland RCB-0527 Jyg-MC(B) cDNA, RIKEN full-length enriched library, clone:G930025P03 product:unclassifiable, full insert sequence" ---  
1446552\_at 0.86509 "solute carrier family 12, member 3" Slc12a3  
1446553\_at 0.94159 Hemopoietic cell kinase Hck  
1446554\_at 0.94282 glycoprotein 6 (platelet) /// similar to glycoprotein VI (platelet) Gp6 ///

## LOC636242

1446555\_at 0.86880 "12 days embryo spinal ganglion cDNA, RIKEN full-length enriched library, clone:D130076B20 product:unclassifiable, full insert sequence" ---

1446556\_at 1.07591 "potassium voltage-gated channel, Shal-related family, member 1" Kcnd1

1446557\_at 0.96045 RIKEN cDNA E130309F12 gene E130309F12Rik

1446558\_at 1.17210 RIKEN cDNA F730015K02 gene F730015K02Rik

1446559\_at 0.83690 RIKEN cDNA D830016K09 gene D830016K09Rik

1446560\_at 0.92690 "protease, serine, 23" Prss23

1446561\_at 0.92606 paired box gene 8 Pax8

1446562\_at 0.97914 SH3-domain kinase binding protein 1 Sh3kbp1

1446563\_at 1.13946 --- ---

1446564\_at 0.85489 "DNA segment, Chr 18, ERATO Doi 169, expressed" D18Ertd169e

1446565\_at 1.96545 "Mannosidase, alpha, class 1A, member 2" Man1a2

1446566\_at 1.59821 "Adaptor-related protein complex 2, beta 1 subunit" Ap2b1

1446567\_at 1.09820 Cyclin D3 Ccnd3

1446568\_at 0.93842 SREBP cleavage activating protein Scap

1446569\_at 0.92227 Integrin alpha 1 Itga1

1446570\_at 1.14586 Mastermind like 2 (Drosophila) Maml2

1446571\_at 1.92540 RIKEN cDNA A830039H10 gene A830039H10Rik

1446572\_at 0.94588 Ubiquitin specific peptidase 53 Usp53

1446573\_at 0.87329 EGF-like repeats and discoidin I-like domains 3 Edil3

1446574\_at 0.92348 Nuclear receptor co-repressor 1 Ncor1

1446575\_at 1.02366 expressed sequence C77583 C77583

1446576\_at 0.98817 RIKEN cDNA 4931419K03 gene 4931419K03Rik

1446577\_at 1.10465 "Phosphodiesterase 4B, cAMP specific" Pde4b

1446578\_at 1.01399 --- ---

1446579\_at 0.99715 --- ---

1446580\_at 1.08737 RIKEN cDNA 9430083G14 gene 9430083G14Rik

1446581\_at 1.00327 Protocadherin 11 X-linked Pcdh11x

1446582\_at 1.09721 DNA polymerase N Poln

1446583\_at 1.03938 Transcribed locus ---

1446584\_at 0.93090 Thioredoxin domain containing 4 (endoplasmic reticulum) Txndc4

1446585\_at 0.92277 "Discs, large homolog 2 (Drosophila)" Dlgh2

1446586\_at 0.97648 RIKEN cDNA 8030463A06 gene 8030463A06Rik

1446587\_at 1.05836 RIKEN cDNA 2310042E16 gene 2310042E16Rik

1446588\_at 1.04845 --- ---

1446589\_at 0.97106 Rhomboid domain containing 1 Rhbdd1

1446590\_at 0.96661 --- ---

1446591\_at 1.25605 "gene model 1574, (NCBI)" Gm1574

1446592\_at 1.71566 --- ---

1446593\_at 1.33842 Triple functional domain (PTPRF interacting) Trio

1446594\_at 1.00422 --- ---

1446595\_at 1.21970 intersectin 2 Itsn2

|            |         |                                                                    |               |
|------------|---------|--------------------------------------------------------------------|---------------|
| 1446596_at | 1.00566 | RIKEN cDNA C130009A20 gene                                         | C130009A20Rik |
| 1446597_at | 0.89718 | Hypothetical LOC67660                                              | LOC67660      |
| 1446598_at | 2.26200 | "Protein kinase C, alpha"                                          | Prkca         |
| 1446599_at | 1.00216 | ---                                                                | ---           |
| 1446600_at | 1.05576 | ---                                                                | ---           |
| 1446601_at | 0.96045 | ---                                                                | ---           |
| 1446602_at | 1.03579 | FERM domain containing 3                                           | Frmd3         |
| 1446603_at | 1.00274 | ---                                                                | ---           |
| 1446604_at | 1.13127 | ---                                                                | ---           |
| 1446605_at | 1.33463 | SLIT-ROBO Rho GTPase activating protein 3                          | Srgap3        |
| 1446606_at | 1.10511 | region containing RIKEN cDNA 1700028E10 gene; hypothetical protein |               |
| A630054D14 |         | LOC625175                                                          |               |
| 1446607_at | 1.18445 | Microtubule-associated protein 7                                   | Mtap7         |
| 1446608_at | 1.05350 | Casitas B-lineage lymphoma                                         | Cbl           |
| 1446609_at | 0.76269 | ---                                                                | ---           |
| 1446610_at | 1.01296 | "engulfment and cell motility 1, ced-12 homolog (C. elegans)"      | Elmo1         |
| 1446611_at | 1.07932 | Arginine-tRNA-protein transferase 1                                | Ate1          |
| 1446612_at | 0.92487 | RIKEN cDNA 9330118A15 gene                                         | 9330118A15Rik |
| 1446613_at | 0.89411 | RIKEN cDNA 1190005F20 gene                                         | 1190005F20Rik |
| 1446614_at | 1.07378 | ---                                                                | ---           |
| 1446615_at | 0.99767 | ---                                                                | ---           |
| 1446616_at | 1.00992 | Glioma tumor suppressor candidate region gene 1                    | Gltscr1       |
| 1446617_at | 0.86104 | "ST8 alpha-N-acetyl-neuraminide alpha-2,8-sialyltransferase 4"     | St8sia4       |
| 1446618_at | 1.32833 | hypothetical gene supported by AK038224                            | LOC432971     |
| 1446619_at | 1.03794 | RIKEN cDNA A130038J17 gene                                         | A130038J17Rik |
| 1446620_at | 0.97535 | Myosin ID                                                          | Myo1d         |
| 1446621_at | 1.16877 | Chromodomain helicase DNA binding protein 7                        | Chd7          |
| 1446622_at | 1.02927 | RIKEN cDNA A330068G13 gene                                         | A330068G13Rik |
| 1446623_at | 0.96635 | ---                                                                | ---           |
| 1446624_at | 0.90824 | Fukuyama type congenital muscular dystrophy homolog (human)        | Fcmd          |
| 1446625_at | 0.88336 | transmembrane protein 100                                          | Tmem100       |
| 1446626_at | 1.18829 | "DNA segment, Chr 16, human D22S680E, expressed"                   | D16H22S680E   |
| 1446627_at | 2.00161 | "Serine/threonine kinase 3 (Ste20, yeast homolog)"                 | Stk3          |
| 1446628_at | 1.04474 | zinc finger and BTB domain containing 24                           | Zbtb24        |
| 1446629_at | 1.06523 | expressed sequence C85938                                          | C85938        |
| 1446630_at | 1.17188 | ---                                                                | ---           |
| 1446631_at | 0.91758 | hypothetical protein 9430083I22                                    | 9430083I22    |
| 1446632_at | 1.44432 | "Calcium channel, voltage-dependent, beta 2 subunit"               | Cacnb2        |
| 1446633_at | 1.22246 | autophagy-related 7 (yeast)                                        | Atg7          |
| 1446634_at | 1.04297 | RIKEN cDNA D830036C21 gene                                         | D830036C21Rik |
| 1446635_at | 1.09571 | "DNA segment, Chr 13, ERATO Doi 476, expressed"                    | D13Ertd476e   |
| 1446636_at | 0.86059 | tensin 3                                                           | Tns3          |
| 1446637_at | 0.92904 | hypothetical protein LOC666539                                     | LOC666539     |

|            |         |                                                                                                                                |               |
|------------|---------|--------------------------------------------------------------------------------------------------------------------------------|---------------|
| 1446638_at | 0.94599 | "protein tyrosine phosphatase, receptor type, U"                                                                               | Ptpru         |
| 1446639_at | 1.03705 | ---                                                                                                                            | ---           |
| 1446640_at | 0.90991 | Transcribed locus                                                                                                              | ---           |
| 1446641_at | 1.05755 | Synaptotagmin VII                                                                                                              | Syt7          |
| 1446642_at | 1.02808 | PHD finger protein 14                                                                                                          | Phf14         |
| 1446643_at | 0.93244 | RIKEN cDNA 5330409N07 gene                                                                                                     | 5330409N07Rik |
| 1446644_at | 1.25791 | Bromodomain containing 3                                                                                                       | Brd3          |
| 1446645_at | 0.91443 | RIKEN cDNA A730037C10 gene                                                                                                     | A730037C10Rik |
| 1446646_at | 1.00217 | "TAF3 RNA polymerase II, TATA box binding protein (TBP)-associated factor" Taf3                                                |               |
| 1446647_at | 1.09627 | ---                                                                                                                            | ---           |
| 1446648_at | 1.15703 | Syntaxin binding protein 4                                                                                                     | Stxbp4        |
| 1446649_at | 1.07845 | "Centaurin, delta 1"                                                                                                           | Centd1        |
| 1446650_at | 0.99786 | ---                                                                                                                            | ---           |
| 1446651_at | 1.01287 | ---                                                                                                                            | ---           |
| 1446652_at | 1.13872 | RALBP1 associated Eps domain containing protein 2                                                                              | Reps2         |
| 1446653_at | 1.03494 | ---                                                                                                                            | ---           |
| 1446654_at | 1.11163 | ---                                                                                                                            | ---           |
| 1446655_at | 1.06903 | SCY1-like 3 ( <i>S. cerevisiae</i> )                                                                                           | Scyl3         |
| 1446656_at | 1.00304 | Angiopoietin 1                                                                                                                 | Angpt1        |
| 1446657_at | 0.97541 | ---                                                                                                                            | ---           |
| 1446658_at | 1.14236 | Transcribed locus                                                                                                              | ---           |
| 1446659_at | 0.99694 | "15 days embryo head cDNA, RIKEN full-length enriched library, clone: D930044F01 product:unclassifiable, full insert sequence" | ---           |
| 1446660_at | 1.10829 | Coiled-coil domain containing 46                                                                                               | Ccdc46        |
| 1446661_at | 1.02780 | ---                                                                                                                            | ---           |
| 1446662_at | 1.06760 | RIKEN cDNA 4930562C15 gene                                                                                                     | 4930562C15Rik |
| 1446663_at | 0.98631 | "Calcium/calmodulin-dependent protein kinase II, delta"                                                                        | Camk2d        |
| 1446664_at | 0.97715 | "DNA segment, Chr 15, ERATO Doi 154, expressed"                                                                                | D15Ertd154e   |
| 1446665_at | 1.06251 | expressed sequence C80918                                                                                                      | C80918        |
| 1446666_at | 0.91239 | "a disintegrin-like and metallopeptidase (reprolysin type) with thrombospondin type 1 motif, 12"                               | Adamts12      |
| 1446667_at | 1.10073 | ---                                                                                                                            | ---           |
| 1446668_at | 0.87729 | "PREDICTED: Mus musculus similar to sidekick homolog 1 (LOC620969), mRNA"                                                      | ---           |
| 1446669_at | 0.99760 | Early B-cell factor 1                                                                                                          | Ebf1          |
| 1446670_at | 1.01843 | "CUG triplet repeat, RNA binding protein 2"                                                                                    | Cugbp2        |
| 1446671_at | 0.97416 | "Protein phosphatase 1, regulatory (inhibitor) subunit 14c"                                                                    | Ppp1r14c      |
| 1446672_at | 1.02521 | ---                                                                                                                            | ---           |
| 1446673_at | 0.85369 | RIKEN cDNA D330013E07 gene                                                                                                     | D330013E07Rik |
| 1446674_at | 1.06470 | Kinesin 2                                                                                                                      | Kns2          |
| 1446675_at | 0.97927 | adenosine kinase                                                                                                               | Adk           |
| 1446676_at | 0.90662 | hypothetical protein A130033P14                                                                                                | A130033P14    |

|              |         |                                                                                                                                     |                      |
|--------------|---------|-------------------------------------------------------------------------------------------------------------------------------------|----------------------|
| 1446677_at   | 1.03313 | RIKEN cDNA A830029E22 gene                                                                                                          | A830029E22Rik        |
| 1446678_at   | 0.93662 | "DNA segment, Chr 14, ERATO Doi 16, expressed"                                                                                      | D14Ertld16e          |
| 1446679_at   | 1.10331 | "Glutamate receptor, metabotropic 5"                                                                                                | Grm5                 |
| 1446680_at   | 1.05122 | ---                                                                                                                                 | ---                  |
| 1446681_at   | 1.01313 | expressed sequence BB086117                                                                                                         | BB086117             |
| 1446682_at   | 0.91803 | Transcribed locus                                                                                                                   | ---                  |
| 1446683_at   | 1.08665 | epidermal growth factor receptor pathway substrate 15-like 1                                                                        | Eps1511              |
| 1446684_at   | 0.95263 | GTPase activating RANGAP domain-like 1                                                                                              | Garnl1               |
| 1446685_at   | 0.99527 | "Similar to matrilin 1, cartilage matrix protein"                                                                                   | LOC436089            |
| 1446686_at   | 1.04010 | "DnaJ (Hsp40) homolog, subfamily C, member 11"                                                                                      | Dnajc11              |
| 1446687_at   | 0.94807 | "splicing factor 3a, subunit 1"                                                                                                     | Sf3a1                |
| 1446688_at   | 2.05188 | "Guanine nucleotide binding protein, alpha q polypeptide"                                                                           | Gnaq                 |
| 1446689_at   | 1.00323 | RIKEN cDNA D230007K08 gene                                                                                                          | D230007K08Rik        |
| 1446690_at   | 0.96862 | ---                                                                                                                                 | ---                  |
| 1446691_at   | 1.16124 | "Platelet-derived growth factor, D polypeptide"                                                                                     | Pdgfd                |
| 1446692_at   | 1.08891 | Nuclear fragile X mental retardation protein interacting protein 2                                                                  | Nufip2               |
| 1446693_at   | 1.21427 | ---                                                                                                                                 | ---                  |
| 1446694_at   | 0.96510 | Dynamin 3                                                                                                                           | Dnm3                 |
| 1446695_at   | 0.94505 | 5'-3' exoribonuclease 1                                                                                                             | Xrn1                 |
| 1446696_at   | 0.97585 | intraflagellar transport 57 homolog (Chlamydomonas)                                                                                 | Ift57                |
| 1446697_at   | 0.96950 | ---                                                                                                                                 | ---                  |
| 1446698_at   | 1.31590 | Mortality factor 4 like 1                                                                                                           | Morf411              |
| 1446699_at   | 0.86888 | jumonji domain containing 2A                                                                                                        | Jmjd2a               |
| 1446700_at   | 1.08906 | ---                                                                                                                                 | ---                  |
| 1446701_at   | 0.90199 | "ATP-binding cassette, sub-family B (MDR/TAP), member 1B"                                                                           | Abcb1b               |
| 1446702_at   | 0.94391 | Kinectin 1                                                                                                                          | Ktn1                 |
| 1446703_at   | 0.99863 | Ring finger and WD repeat domain 2                                                                                                  | Rfwd2                |
| 1446704_at   | 1.49769 | Thiamin pyrophosphokinase                                                                                                           | Tpk1                 |
| 1446705_at   | 1.00275 | ---                                                                                                                                 | ---                  |
| 1446706_at   | 0.89216 | expressed sequence C79123                                                                                                           | C79123               |
| 1446707_at   | 1.09721 | ---                                                                                                                                 | ---                  |
| 1446708_at   | 0.87918 | "hypoxia inducible factor 3, alpha subunit"                                                                                         | Hif3a                |
| 1446709_at   | 0.90809 | ---                                                                                                                                 | ---                  |
| 1446710_at   | 1.10243 | expressed sequence C76669                                                                                                           | C76669               |
| 1446711_at   | 1.09240 | RIKEN cDNA A130040G06 gene                                                                                                          | A130040G06Rik        |
| 1446712_at   | 1.12369 | "neurotrophic tyrosine kinase, receptor, type 2"                                                                                    | Ntrk2                |
| 1446713_at   | 1.03124 | Tial1 cytotoxic granule-associated RNA binding protein-like 1                                                                       | Tial1                |
| 1446714_x_at | 1.02665 | Transcribed locus                                                                                                                   | ---                  |
| 1446715_at   | 1.02123 | "ATP-binding cassette, sub-family A (ABC1), member 13 /// similar to ATP binding cassette, sub-family A (ABC1), member 13"          | Abca13 /// LOC672028 |
| 1446716_at   | 1.02255 | "Transcribed locus, moderately similar to XP_576460.1 PREDICTED: similar to hypothetical protein PB402898.00.0 [Rattus norvegicus]" | ---                  |
| 1446717_at   | 1.02709 | ---                                                                                                                                 | ---                  |

1446718\_at 1.10719 "nuclear factor of kappa light chain gene enhancer in B-cells inhibitor, beta"  
Nfkbib  
1446719\_at 1.14284 RIKEN cDNA D530031C13 gene D530031C13Rik  
1446720\_at 0.88538 Activated leukocyte cell adhesion molecule Alcam  
1446721\_at 0.93533 --- ---  
1446722\_at 1.52687 "Guanine nucleotide binding protein, alpha 13" Gna13  
1446723\_at 1.04604 --- ---  
1446724\_at 1.07499 FCH domain only 2 Fcho2  
1446725\_at 0.99792 RIKEN cDNA A130094D17 gene A130094D17Rik  
1446726\_at 0.94220 hypothetical protein LOC665490 /// hypothetical protein LOC669883 ///  
hypothetical protein LOC676857 LOC665490 /// LOC669883 /// LOC676857  
1446727\_at 0.97040 --- ---  
1446728\_at 0.98001 "DNA segment, Chr 3, ERATO Doi 797, expressed" D3ErtD797e  
1446729\_at 0.94636 dispatched homolog 2 (Drosophila) Disp2  
1446730\_at 1.06326 Expressed sequence C79267 C79267  
1446731\_at 1.05089 hypothetical protein A730016A17 A730016A17  
1446732\_at 1.09523 --- ---  
1446733\_at 1.16359 --- ---  
1446734\_at 0.97986 expressed sequence C77438 C77438  
1446735\_at 1.06059 intersectin 2 Itsn2  
1446736\_at 0.94399 Transducin (beta)-like 1 X-linked Tbl1x  
1446737\_a\_at 0.92595 hook homolog 3 (Drosophila) Hook3  
1446738\_at 0.95324 "DNA segment, Chr 7, Wayne State University 130, expressed" D7Wsu130e  
1446739\_at 1.45057 "Beta galactoside alpha 2,6 sialyltransferase 1" St6gal1  
1446740\_at 1.04330 Transcribed locus ---  
1446741\_at 0.96050 hypothetical gene supported by AK052160 LOC432868  
1446742\_at 0.92434 Nuclear factor I/A Nfia  
1446743\_at 0.95892 LAS1-like (S. cerevisiae) Las11  
1446744\_at 0.87156 sorbin and SH3 domain containing 2 Sorbs2  
1446745\_at 1.02982 hypothetical LOC433637 LOC433637  
1446746\_at 0.89651 Oxysterol binding protein-like 3 Osbpl3  
1446747\_at 0.86769 RIKEN cDNA C230086A09 gene C230086A09Rik  
1446748\_at 1.03001 RIKEN cDNA 2010007H06 gene 2010007H06Rik  
1446749\_at 1.02044 kinectin 1 Ktn1  
1446750\_at 1.24923 imprinted and ancient Impact  
1446751\_s\_at 1.48041 imprinted and ancient Impact  
1446752\_at 1.00333 expressed sequence C78200 C78200  
1446753\_at 1.10760 --- ---  
1446754\_a\_at 0.98970 Vax2 opposite strand transcript 1 Vax2os1  
1446755\_at 0.99369 Secretogranin V Scg5  
1446756\_at 1.11584 growth hormone secretagogue receptor Ghhr  
1446757\_at 1.10700 "SGT1, suppressor of G2 allele of SKP1 (S. cerevisiae)" Sugt1  
1446758\_at 1.02254 brain and reproductive organ-expressed protein Bre

1446759\_at 1.31945 RIKEN cDNA 5830457H20 gene 5830457H20Rik  
1446760\_at 1.03276 thyroid hormone receptor interactor 13 Trip13  
1446761\_at 1.00181 "DNA segment, Chr 8, ERATO Doi 56, expressed" D8Ertd56e  
1446762\_at 1.00776 Transcribed locus ---  
1446763\_at 0.90838 "Potassium voltage-gated channel, subfamily H (eag-related), member 1" Kcnh1  
1446764\_at 0.93661 Wingless-related MMTV integration site 3A Wnt3a  
1446765\_at 0.88528 expressed sequence C77973 C77973  
1446766\_at 1.10287 expressed sequence AU022746 AU022746  
1446767\_at 0.96144 B-cell CLL/lymphoma 9 Bcl9  
1446768\_at 0.98547 Transcribed locus ---  
1446769\_at 1.10531 RIKEN cDNA 2810439F02 gene 2810439F02Rik  
1446770\_at 0.95640 RIKEN cDNA 2610208K16 gene 2610208K16Rik  
1446771\_at 1.01904 "Tubulin, alpha 8" Tuba8  
1446772\_at 0.95849 "Sema domain, seven thrombospondin repeats (type 1 and type 1-like),  
transmembrane domain (TM) and short cytoplasmic domain, (semaphorin) 5A" Sema5a  
1446773\_at 1.00095 Hypothetical protein E230025N22 E230025N22  
1446774\_at 1.11711 "synovial apoptosis inhibitor 1, synoviolin" Syvn1  
1446775\_at 0.95752 --- ---  
1446776\_at 1.03715 expressed sequence C77581 C77581  
1446777\_at 0.94004 Secreted phosphoprotein 2 Spp2  
1446778\_at 1.06871 Hormonally upregulated Neu-associated kinase Hunk  
1446779\_at 1.20617 Nuclear protein localization 4 homolog (S. cerevisiae) Nploc4  
1446780\_at 1.05665 Receptor tyrosine kinase-like orphan receptor 2 Ror2  
1446781\_at 0.93463 "DNA segment, Chr 8, ERATO Doi 54, expressed" D8Ertd54e  
1446782\_at 0.92841 lines homolog 2 (Drosophila) Lins2  
1446783\_at 1.04725 "Growth arrest and DNA-damage-inducible, gamma interacting protein 1"  
Gadd45gip1  
1446784\_at 1.00367 "A disintegrin-like and metallopeptidase (reprolysin type) with thrombospondin  
type 1 motif, 6" Adamts6  
1446785\_at 0.86845 "Transcribed locus, weakly similar to XP\_220328.3 PREDICTED: similar to  
metalloprotease-disintegrin meltrin beta [Rattus norvegicus]" ---  
1446786\_at 0.94146 Amyloid beta (A4) precursor-like protein 2 Aplp2  
1446787\_at 1.22459 COMM domain containing 1 Commd1  
1446788\_at 1.04336 RIKEN cDNA A430091L06 gene A430091L06Rik  
1446789\_at 0.96097 Zinc finger CCHC-type and RNA binding motif 1 Zcrb1  
1446790\_at 0.91082 expressed sequence C78948 C78948  
1446791\_at 0.98813 Peptidase inhibitor 15 Pi15  
1446792\_at 0.95110 "Transcribed locus, moderately similar to XP\_579119.1 PREDICTED: ATP-  
binding cassette, sub-family G (WHITE), member 3 [Rattus norvegicus]" ---  
1446793\_at 0.97873 Transcribed locus ---  
1446794\_at 1.12453 G protein-coupled receptor 176 Gpr176  
1446795\_at 0.87169 Vav 3 oncogene Vav3  
1446796\_at 1.02400 --- ---



|              |         |                                                              |               |
|--------------|---------|--------------------------------------------------------------|---------------|
| 1446797_at   | 0.90066 | RIKEN cDNA A330075M08 gene                                   | A330075M08Rik |
| 1446798_at   | 1.06119 | ---                                                          | ---           |
| 1446799_at   | 0.98254 | ---                                                          | ---           |
| 1446800_at   | 0.93711 | ---                                                          | ---           |
| 1446801_at   | 0.97260 | ---                                                          | ---           |
| 1446802_at   | 1.33146 | ATX1 (antioxidant protein 1) homolog 1 (yeast)               | Atox1         |
| 1446803_at   | 0.88946 | Dedicator of cytokinesis 9                                   | Dock9         |
| 1446804_at   | 0.96214 | nucleoredoxin                                                | Nxn           |
| 1446805_at   | 1.04937 | "Gamma-aminobutyric acid (GABA-A) receptor, subunit alpha 2" | Gabra2        |
| 1446806_at   | 1.02801 | ---                                                          | ---           |
| 1446807_at   | 1.15803 | ubiquitin specific peptidase 8                               | Usp8          |
| 1446808_at   | 0.96079 | ---                                                          | ---           |
| 1446809_at   | 0.89857 | RIKEN cDNA B830045N13 gene                                   | B830045N13Rik |
| 1446810_at   | 1.27835 | RIKEN cDNA A730062M13 gene                                   | A730062M13Rik |
| 1446811_at   | 1.02003 | Mohawk                                                       | Mkx           |
| 1446812_at   | 0.92274 | Heart and neural crest derivatives expressed transcript 2    | Hand2         |
| 1446813_s_at | 1.01320 | "DNA segment, Chr 5, ERATO Doi 560, expressed"               | D5ErtD560e    |
| 1446814_at   | 0.96491 | ---                                                          | ---           |
| 1446815_at   | 1.25573 | "Zinc finger, CSL-type containing 3"                         | Zcsl3         |
| 1446816_at   | 1.06149 | Transcribed locus                                            | ---           |
| 1446817_at   | 1.09455 | "DNA segment, Chr 10, ERATO Doi 43, expressed"               | D10ErtD43e    |
| 1446818_at   | 1.29748 | Mindbomb homolog 1 (Drosophila)                              | Mib1          |
| 1446819_at   | 1.01179 | "RAN, member RAS oncogene family"                            | Ran           |
| 1446820_at   | 1.07135 | zinc finger protein 182                                      | Zfp182        |
| 1446821_at   | 1.06445 | Protocadherin 17                                             | Pcdh17        |
| 1446822_at   | 0.95215 | ---                                                          | ---           |
| 1446823_at   | 0.93651 | "DNA segment, Chr 4, ERATO Doi 103, expressed"               | D4ErtD103e    |
| 1446824_at   | 0.91990 | Phosphoglucomutase 1                                         | Pgm1          |
| 1446825_at   | 0.95063 | ---                                                          | ---           |
| 1446826_at   | 1.00427 | exportin 7                                                   | Xpo7          |
| 1446827_at   | 0.94843 | nuclear receptor coactivator 2                               | Ncoa2         |
| 1446828_at   | 0.90667 | ---                                                          | ---           |
| 1446829_at   | 0.90878 | "DNA segment, Chr 12, ERATO Doi 216, expressed"              | D12ErtD216e   |
| 1446830_at   | 1.01106 | expressed sequence AU015892                                  | AU015892      |
| 1446831_at   | 1.05211 | "DNA segment, Chr 5, ERATO Doi 521, expressed"               | D5ErtD521e    |
| 1446832_at   | 0.89956 | ---                                                          | ---           |
| 1446833_at   | 0.98608 | Dedicator of cytokinesis 9                                   | Dock9         |
| 1446834_at   | 1.01062 | Cathepsin C                                                  | Ctsc          |
| 1446835_at   | 2.25637 | Ferritin light chain 1                                       | Ftl1          |
| 1446836_at   | 0.87776 | ---                                                          | ---           |
| 1446837_at   | 0.99775 | Methyltransferase 5 domain containing 1                      | Mett5d1       |
| 1446838_at   | 0.90037 | "ATPase family, AAA domain containing 1"                     | Atad1         |
| 1446839_at   | 0.94795 | Odd Oz/ten-m homolog 4 (Drosophila)                          | Odz4          |

1446840\_at 1.13752 Thyroid hormone receptor associated protein 1 Thrap1  
1446841\_at 1.01192 "12 days embryo spinal ganglion cDNA, RIKEN full-length enriched library, clone:D130065L21 product:unclassifiable, full insert sequence" ---  
1446842\_at 0.99395 "DNA segment, Chr 4, ERATO Doi 571, expressed" D4Ertd571e  
1446843\_at 0.94369 --- ---  
1446844\_at 0.93348 coiled-coil-helix-coiled-coil-helix domain containing 7 Chchd7  
1446845\_at 1.05369 similar to RIKEN cDNA 1110067D22 LOC272350  
1446846\_at 0.87698 "16 days neonate thymus cDNA, RIKEN full-length enriched library, clone:A130082C12 product:unclassifiable, full insert sequence" ---  
1446847\_at 0.99220 RIKEN cDNA 0610010D24 gene 0610010D24Rik  
1446848\_at 1.09605 --- ---  
1446849\_at 0.98683 Autism susceptibility candidate 2 Auts2  
1446850\_at 0.90001 Phosphatidic acid phosphatase type 2B Ppap2b  
1446851\_at 0.86817 "collagen, type XXII, alpha 1" Col22a1  
1446852\_at 1.11670 "Serine (or cysteine) peptidase inhibitor, clade B, member 9b" Serpinb9b  
1446853\_at 0.98261 WW domain containing E3 ubiquitin protein ligase 1 Wwp1  
1446854\_at 1.03376 "Glutamate receptor, metabotropic 7" Grm7  
1446855\_at 1.09799 vacuolar protein sorting 13 D (yeast) Vps13d  
1446856\_at 0.98948 "DNA segment, Chr 3, Wayne State University 167, expressed" D3Wsu167e  
1446857\_at 1.09028 expressed sequence C87115 C87115  
1446858\_at 1.00658 expressed sequence AU022245 AU022245  
1446859\_at 0.99493 --- ---  
1446860\_at 1.04740 Growth factor receptor bound protein 2-associated protein 2 Gab2  
1446861\_at 1.38773 glucosamine (N-acetyl)-6-sulfatase Gns  
1446862\_at 1.09229 --- ---  
1446863\_at 0.92654 KCNQ1 overlapping transcript 1 Kcnq1ot1  
1446864\_at 1.03598 S100P binding protein S100pbp  
1446865\_at 0.95889 "Sema domain, seven thrombospondin repeats (type 1 and type 1-like), transmembrane domain (TM) and short cytoplasmic domain, (semaphorin) 5A" Sema5a  
1446866\_at 0.85319 RIKEN cDNA A530089I17 gene A530089I17Rik  
1446867\_at 1.04870 --- ---  
1446868\_at 1.08488 host cell factor C1 Hcfc1  
1446869\_at 0.89551 "In vitro fertilized eggs cDNA, RIKEN full-length enriched library, clone:7420455A11 product:unclassifiable, full insert sequence" ---  
1446870\_at 1.12406 "DNA segment, Chr 4, ERATO Doi 510, expressed" D4Ertd510e  
1446871\_at 0.94193 "DNA segment, Chr 7, ERATO Doi 481, expressed" D7Ertd481e  
1446872\_at 0.98900 expressed sequence AU021877 AU021877  
1446873\_at 0.95440 --- ---  
1446874\_at 0.96040 --- ---  
1446875\_at 0.96446 Interleukin 1 receptor accessory protein-like 2 Il1rapl2  
1446876\_at 1.03584 WD repeat domain 22 Wdr22  
1446877\_at 0.92932 Expressed sequence C87490 C87490  
1446878\_at 0.93512 LON peptidase N-terminal domain and ring finger 2 Lonrf2

|            |         |                                                                                                                                               |               |
|------------|---------|-----------------------------------------------------------------------------------------------------------------------------------------------|---------------|
| 1446879_at | 0.90497 | "Glutamate receptor, ionotropic, delta 2"                                                                                                     | Grid2         |
| 1446880_at | 0.91784 | SAM and SH3 domain containing 1                                                                                                               | Sash1         |
| 1446881_at | 1.06573 | expressed sequence AU022749                                                                                                                   | AU022749      |
| 1446882_at | 0.95515 | ---                                                                                                                                           | ---           |
| 1446883_at | 0.87274 | RIKEN cDNA 4933427D06 gene                                                                                                                    | 4933427D06Rik |
| 1446884_at | 1.04418 | expressed sequence AU022554                                                                                                                   | AU022554      |
| 1446885_at | 0.97082 | ---                                                                                                                                           | ---           |
| 1446886_at | 1.09059 | Ubiquitin specific peptidase 3                                                                                                                | Usp3          |
| 1446887_at | 1.07591 | Transcribed locus                                                                                                                             | ---           |
| 1446888_at | 0.84657 | ---                                                                                                                                           | ---           |
| 1446889_at | 0.93886 | "DNA segment, Chr 2, ERATO Doi 105, expressed"                                                                                                | D2Ertd105e    |
| 1446890_at | 0.97484 | ---                                                                                                                                           | ---           |
| 1446891_at | 0.95543 | "Amyotrophic lateral sclerosis 2 (juvenile) chromosome region, candidate 13 (human)"                                                          | Als2cr13      |
| 1446892_at | 1.39122 | Leucine rich repeat containing 16                                                                                                             | Lrrc16        |
| 1446893_at | 0.96385 | hypothetical gene supported by AK035124                                                                                                       | LOC434228     |
| 1446894_at | 1.23961 | Aryl hydrocarbon receptor nuclear translocator 2                                                                                              | Arnt2         |
| 1446895_at | 0.83015 | ---                                                                                                                                           | ---           |
| 1446896_at | 0.97105 | expressed sequence AU022186                                                                                                                   | AU022186      |
| 1446897_at | 0.95535 | ---                                                                                                                                           | ---           |
| 1446898_at | 1.07889 | Ubiquitin associated domain containing 1                                                                                                      | Ubadc1        |
| 1446899_at | 1.40191 | ---                                                                                                                                           | ---           |
| 1446900_at | 1.01902 | "DNA segment, Chr 1, ERATO Doi 218, expressed"                                                                                                | D1Ertd218e    |
| 1446901_at | 0.94772 | expressed sequence AU022077                                                                                                                   | AU022077      |
| 1446902_at | 0.92961 | expressed sequence AU022538                                                                                                                   | AU022538      |
| 1446903_at | 1.08315 | Angiopoietin 2                                                                                                                                | Angpt2        |
| 1446904_at | 1.15341 | Rho guanine nucleotide exchange factor (GEF) 11                                                                                               | Arhgef11      |
| 1446905_at | 0.98474 | Transcribed locus                                                                                                                             | ---           |
| 1446906_at | 1.10617 | expressed sequence C81615                                                                                                                     | C81615        |
| 1446907_at | 1.00930 | expressed sequence C87679                                                                                                                     | C87679        |
| 1446908_at | 0.99182 | Interleukin 28 receptor alpha                                                                                                                 | Il28ra        |
| 1446909_at | 0.91548 | Angiomotin-like 1                                                                                                                             | Amotl1        |
| 1446910_at | 1.04263 | "Sema domain, seven thrombospondin repeats (type 1 and type 1-like), transmembrane domain (TM) and short cytoplasmic domain, (semaphorin) 5A" | Sema5a        |
| 1446911_at | 1.11250 | Intersectin 2                                                                                                                                 | Itsn2         |
| 1446912_at | 1.07626 | Transmembrane protein 28                                                                                                                      | Tmem28        |
| 1446913_at | 0.94147 | ---                                                                                                                                           | ---           |
| 1446914_at | 1.12560 | expressed sequence C80425                                                                                                                     | C80425        |
| 1446915_at | 1.05326 | "DNA segment, Chr 7, ERATO Doi 316, expressed"                                                                                                | D7Ertd316e    |
| 1446916_at | 0.91433 | ---                                                                                                                                           | ---           |
| 1446917_at | 1.06355 | ---                                                                                                                                           | ---           |
| 1446918_at | 0.97885 | Latrophilin 3                                                                                                                                 | Lphn3         |
| 1446919_at | 1.05231 | CDNA sequence BC062115                                                                                                                        | BC062115      |

|              |         |                                                                                                            |                       |
|--------------|---------|------------------------------------------------------------------------------------------------------------|-----------------------|
| 1446920_at   | 1.25683 | RIKEN cDNA E130308A19 gene                                                                                 | E130308A19Rik         |
| 1446921_at   | 0.96146 | Growth factor receptor bound protein 10                                                                    | Grb10                 |
| 1446922_at   | 1.03014 | ---                                                                                                        | ---                   |
| 1446923_at   | 0.95429 | "Protein tyrosine phosphatase-like (proline instead of catalytic arginine), member b"                      | Ptplb                 |
| 1446924_at   | 0.91362 | Transcribed locus                                                                                          | ---                   |
| 1446925_at   | 0.91109 | beta-transducin repeat containing protein                                                                  | Btrc                  |
| 1446926_at   | 0.95581 | PYD and CARD domain containing                                                                             | Pycard                |
| 1446927_at   | 0.98020 | Dedicator of cytokinesis 9                                                                                 | Dock9                 |
| 1446928_at   | 1.05398 | "DnaJ (Hsp40) homolog, subfamily C, member 17 /// similar to DnaJ (Hsp40) homolog, subfamily C, member 17" | Dnajc17 /// LOC638909 |
| 1446929_at   | 1.13300 | BTB and CNC homology 2                                                                                     | Bach2                 |
| 1446930_at   | 1.10771 | Runt related transcription factor 1                                                                        | Runx1                 |
| 1446931_at   | 0.92727 | Transcribed locus                                                                                          | ---                   |
| 1446932_at   | 0.98108 | ---                                                                                                        | ---                   |
| 1446933_at   | 0.99031 | ---                                                                                                        | ---                   |
| 1446934_at   | 0.90938 | ---                                                                                                        | ---                   |
| 1446935_at   | 0.97066 | RIKEN cDNA 9130011E15 gene                                                                                 | 9130011E15Rik         |
| 1446936_at   | 0.97463 | ---                                                                                                        | ---                   |
| 1446937_at   | 1.00128 | fetal Alzheimer antigen Falz                                                                               |                       |
| 1446938_at   | 1.20035 | expressed sequence AA408213                                                                                | AA408213              |
| 1446939_at   | 0.98542 | Tripartite motif protein 34                                                                                | Trim34                |
| 1446940_at   | 0.73334 | Tnf receptor-associated factor 6                                                                           | Traf6                 |
| 1446941_at   | 1.22153 | expressed sequence C78505                                                                                  | C78505                |
| 1446942_at   | 1.02970 | ---                                                                                                        | ---                   |
| 1446943_at   | 1.83358 | Dystonin                                                                                                   | Dst                   |
| 1446944_at   | 1.01863 | "DNA segment, Chr 1, ERATO Doi 84, expressed"                                                              | D1Ertd84e             |
| 1446945_at   | 1.00690 | Cdc42 binding protein kinase alpha                                                                         | Cdc42bpa              |
| 1446946_at   | 1.04878 | "Transforming growth factor, beta receptor I"                                                              | Tgfr1                 |
| 1446947_at   | 1.36516 | ---                                                                                                        | ---                   |
| 1446948_at   | 1.05953 | Density-regulated protein                                                                                  | Denr                  |
| 1446949_at   | 1.10712 | RIKEN cDNA 4930431P19 gene                                                                                 | 4930431P19Rik         |
| 1446950_at   | 1.01833 | Thymocyte selection-associated HMG box gene                                                                | Tox                   |
| 1446951_at   | 0.85703 | ---                                                                                                        | ---                   |
| 1446952_at   | 1.11722 | "DNA segment, Chr 11, ERATO Doi 506, expressed"                                                            | D11Ertd506e           |
| 1446953_at   | 1.04230 | Transcription factor 4                                                                                     | Tcf4                  |
| 1446954_at   | 1.01275 | Pyruvate dehydrogenase E1 alpha 1                                                                          | Pdha1                 |
| 1446955_at   | 1.37845 | "Nuclear receptor subfamily 2, group C, member 2"                                                          | Nr2c2                 |
| 1446956_at   | 0.89309 | cDNA sequence BC004022                                                                                     | BC004022              |
| 1446957_s_at | 1.05477 | cDNA sequence BC004022                                                                                     | BC004022              |
| 1446958_at   | 1.17872 | "DNA segment, Chr 13, ERATO Doi 150, expressed"                                                            | D13Ertd150e           |
| 1446959_at   | 0.94977 | expressed sequence AU021871                                                                                | AU021871              |
| 1446960_at   | 0.86015 | Hypothetical protein LOC626082                                                                             | LOC626082             |

|            |                                                                                                      |               |
|------------|------------------------------------------------------------------------------------------------------|---------------|
| 1446961_at | 0.98949 --- ---                                                                                      |               |
| 1446962_at | 1.07411 "ATP-binding cassette, sub-family D (ALD), member 2"                                         | Abcd2         |
| 1446963_at | 1.76888 --- ---                                                                                      |               |
| 1446964_at | 1.04050 --- ---                                                                                      |               |
| 1446965_at | 1.11497 Rho guanine nucleotide exchange factor (GEF) 12                                              | Arhgef12      |
| 1446966_at | 1.13712 Expressed sequence AU042651                                                                  | AU042651      |
| 1446967_at | 1.04061 F-box and leucine-rich repeat protein 7                                                      | Fbxl7         |
| 1446968_at | 1.31341 phosphatidylinositol binding clathrin assembly protein                                       | Picalm        |
| 1446969_at | 1.10247 RIKEN cDNA 9630037P07 gene                                                                   | 9630037P07Rik |
| 1446970_at | 0.86724 "CCR4-NOT transcription complex, subunit 8"                                                  | Cnot8         |
| 1446971_at | 1.02133 "DNA segment, Chr 10, Wayne State University 159, expressed"                                 | D10Wsu159e    |
| 1446972_at | 4.79519 "DNA segment, Chr 15, Wayne State University 126, expressed"                                 | D15Wsu126e    |
| 1446973_at | 0.98785 RIKEN cDNA 5730405I09 gene                                                                   | 5730405I09Rik |
| 1446974_at | 1.09483 "phosphatidylinositol-3-phosphate/phosphatidylinositol 5-kinase, type III"                   |               |
| Pip5k3     |                                                                                                      |               |
| 1446975_at | 1.00350 "Castor homolog 1, zinc finger (Drosophila)"                                                 | CasZ1         |
| 1446976_at | 1.08591 "DNA segment, Chr 7, ERATO Doi 758, expressed"                                               | D7Ertd758e    |
| 1446977_at | 1.02922 Tnf receptor-associated factor 6                                                             | Traf6         |
| 1446978_at | 0.98905 --- ---                                                                                      |               |
| 1446979_at | 0.95900 "Decapping enzyme, scavenger"                                                                | Dcps          |
| 1446980_at | 0.78057 Transcribed locus                                                                            | ---           |
| 1446981_at | 0.99043 RIKEN cDNA A830010M20 gene                                                                   | A830010M20Rik |
| 1446982_at | 1.80336 Par-3 (partitioning defective 3) homolog (C. elegans)                                        | Pard3         |
| 1446983_at | 0.97035 "Vcell division cycle 73, Paf1/RNA polymerase II complex component, homolog (S. cerevisiae)" | Cdc73         |
| 1446984_at | 0.97162 Protogenin homolog (Gallus gallus)                                                           | Prtg          |
| 1446985_at | 1.07012 "PREDICTED: Mus musculus similar to serine/threonine kinase (LOC626078), mRNA"               | ---           |
| 1446986_at | 0.96949 "scratch homolog 2, zinc finger protein (Drosophila)"                                        | Scr2          |
| 1446987_at | 0.96653 --- ---                                                                                      |               |
| 1446988_at | 1.03016 Nucleoporin 98                                                                               | Nup98         |
| 1446989_at | 0.94609 Transcribed locus                                                                            | ---           |
| 1446990_at | 0.75991 nuclear factor I/A                                                                           | Nfia          |
| 1446991_at | 1.26105 GCN1 general control of amino-acid synthesis 1-like 1 (yeast)                                | Gcn111        |
| 1446992_at | 1.00422 Coiled-coil domain containing 64                                                             | Ccdc64        |
| 1446993_at | 0.86615 Perilipin                                                                                    | Plin          |
| 1446994_at | 0.86549 Exosome component 2                                                                          | Exosc2        |
| 1446995_at | 0.93474 "cytochrome P450, family 7, subfamily b, polypeptide 1"                                      | Cyp7b1        |
| 1446996_at | 0.96127 --- ---                                                                                      |               |
| 1446997_at | 1.02000 "eukaryotic translation initiation factor 3, subunit 7 (zeta)"                               | Eif3s7        |
| 1446998_at | 0.90957 G protein-coupled receptor kinase 5                                                          | Gprk5         |
| 1446999_at | 1.08067 --- ---                                                                                      |               |
| 1447000_at | 1.06965 --- ---                                                                                      |               |

|              |         |                                                                                                                             |               |
|--------------|---------|-----------------------------------------------------------------------------------------------------------------------------|---------------|
| 1447001_at   | 1.03096 | expressed sequence C87114                                                                                                   | C87114        |
| 1447002_at   | 0.97240 | ---                                                                                                                         | ---           |
| 1447003_at   | 1.00946 | Cell cycle progression 1                                                                                                    | Ccpg1         |
| 1447004_at   | 1.01525 | "Phospholipase C, beta 1"                                                                                                   | Plcb1         |
| 1447005_at   | 0.95622 | Transcribed locus                                                                                                           | ---           |
| 1447006_at   | 1.07523 | Myosin ID                                                                                                                   | Myo1d         |
| 1447007_at   | 1.12364 | RIKEN cDNA 1700008I05 gene                                                                                                  | 1700008I05Rik |
| 1447008_at   | 1.11218 | ---                                                                                                                         | ---           |
| 1447009_at   | 1.03412 | expressed sequence C79657                                                                                                   | C79657        |
| 1447010_at   | 1.05474 | Zinc finger protein 609                                                                                                     | Zfp609        |
| 1447011_at   | 0.90640 | ERGIC and golgi 2                                                                                                           | Ergic2        |
| 1447012_at   | 0.96570 | ---                                                                                                                         | ---           |
| 1447013_at   | 1.05108 | CDNA sequence AK220484                                                                                                      | AK220484      |
| 1447014_at   | 1.05878 | ---                                                                                                                         | ---           |
| 1447015_at   | 0.97010 | ---                                                                                                                         | ---           |
| 1447016_at   | 1.34699 | "TBC1 domain family, member 1"                                                                                              | Tbc1d1        |
| 1447017_at   | 1.04594 | Transcribed locus                                                                                                           | ---           |
| 1447018_at   | 0.99900 | ---                                                                                                                         | ---           |
| 1447019_at   | 1.07672 | cytidine monophospho-N-acetylneuraminic acid hydroxylase                                                                    | Cmah          |
| 1447020_at   | 1.80362 | "Zinc finger protein, multitype 2"                                                                                          | Zfpm2         |
| 1447021_at   | 0.92942 | CDNA clone IMAGE:5686051                                                                                                    | ---           |
| 1447022_at   | 0.85164 | "Adult male testis cDNA, RIKEN full-length enriched library, clone:4930402K03 product:unclassifiable, full insert sequence" | ---           |
| 1447023_at   | 1.02424 | ---                                                                                                                         | ---           |
| 1447024_at   | 1.07208 | ---                                                                                                                         | ---           |
| 1447025_at   | 1.47424 | "Ubiquitin-conjugating enzyme E2E 2 (UBC4/5 homolog, yeast)"                                                                | Ube2e2        |
| 1447026_at   | 1.28665 | MAS1 oncogene                                                                                                               | Mas1          |
| 1447027_s_at | 0.93329 | lipoic acid synthetase                                                                                                      | Lias          |
| 1447028_at   | 0.98347 | RIKEN cDNA 4930563E22 gene                                                                                                  | 4930563E22Rik |
| 1447029_at   | 0.88542 | ---                                                                                                                         | ---           |
| 1447030_at   | 0.86510 | ---                                                                                                                         | ---           |
| 1447031_at   | 1.19242 | ---                                                                                                                         | ---           |
| 1447032_at   | 0.83581 | Citrate lyase beta like                                                                                                     | Clybl         |
| 1447033_at   | 0.97019 | "gene model 829, (NCBI)"                                                                                                    | Gm829         |
| 1447034_at   | 2.08556 | Transportin 1                                                                                                               | Tnpol         |
| 1447035_at   | 1.07309 | RIKEN cDNA A230091C14 gene                                                                                                  | A230091C14Rik |
| 1447036_at   | 0.98094 | cell adhesion molecule with homology to L1CAM                                                                               | Chl1          |
| 1447037_at   | 0.89467 | ---                                                                                                                         | ---           |
| 1447038_x_at | 1.28394 | pleckstrin homology domain interacting protein                                                                              | Phip          |
| 1447039_at   | 0.95745 | Patched homolog 1                                                                                                           | Ptch1         |
| 1447040_at   | 1.03554 | Activated leukocyte cell adhesion molecule                                                                                  | Alcam         |
| 1447041_at   | 0.97832 | RIKEN cDNA 9530066K23 gene                                                                                                  | 9530066K23Rik |
| 1447042_at   | 0.95108 | zinc finger and BTB domain containing 34                                                                                    | Zbtb34        |

|              |         |                                                                                                                           |               |
|--------------|---------|---------------------------------------------------------------------------------------------------------------------------|---------------|
| 1447043_at   | 0.95663 | V-erb-a erythroblastic leukemia viral oncogene homolog 4 (avian)                                                          | ErbB4         |
| 1447044_at   | 0.87684 | ---                                                                                                                       | ---           |
| 1447045_at   | 1.03060 | ---                                                                                                                       | ---           |
| 1447046_at   | 0.91821 | "DnaJ (Hsp40) related, subfamily B, member 13"                                                                            | Dnajb13       |
| 1447047_at   | 1.10967 | RIKEN cDNA 2610203C20 gene                                                                                                | 2610203C20Rik |
| 1447048_at   | 1.00353 | RIKEN cDNA 6720458F09 gene                                                                                                | 6720458F09Rik |
| 1447049_at   | 0.95471 | IQ motif and WD repeats 1                                                                                                 | Iqwd1         |
| 1447050_at   | 1.08083 | ---                                                                                                                       | ---           |
| 1447051_at   | 0.85300 | Ring finger protein 43                                                                                                    | Rnf43         |
| 1447052_at   | 1.05822 | ---                                                                                                                       | ---           |
| 1447053_x_at | 1.00296 | "signal sequence receptor, gamma"                                                                                         | Ssr3          |
| 1447054_at   | 0.96453 | expressed sequence C85395                                                                                                 | C85395        |
| 1447055_at   | 0.95849 | "DnaJ (Hsp40) homolog, subfamily C, member 11"                                                                            | Dnajc11       |
| 1447056_at   | 0.84482 | Slit homolog 2 (Drosophila)                                                                                               | Slit2         |
| 1447057_at   | 0.99293 | ---                                                                                                                       | ---           |
| 1447058_at   | 0.94799 | RIKEN cDNA A530058N18 gene                                                                                                | A530058N18Rik |
| 1447059_at   | 0.96851 | ---                                                                                                                       | ---           |
| 1447060_at   | 1.47793 | SET and MYND domain containing 3                                                                                          | Smyd3         |
| 1447061_at   | 1.03685 | "Hypoxia inducible factor 3, alpha subunit"                                                                               | Hif3a         |
| 1447062_at   | 1.53561 | Vacuolar protein sorting 24 (yeast)                                                                                       | Vps24         |
| 1447063_at   | 1.45442 | RIKEN cDNA 1700017B05 gene                                                                                                | 1700017B05Rik |
| 1447064_at   | 1.26159 | ---                                                                                                                       | ---           |
| 1447065_at   | 0.87806 | hypothetical protein 9630041C05                                                                                           | 9630041C05    |
| 1447066_at   | 1.02900 | "Adult inner ear cDNA, RIKEN full-length enriched library, clone:F930039H20 product:unclassifiable, full insert sequence" | ---           |
| 1447067_at   | 0.92858 | ---                                                                                                                       | ---           |
| 1447068_at   | 0.95458 | "Phosphatidylinositol 3 kinase, regulatory subunit, polypeptide 3 (p55)"                                                  | Pik3r3        |
| 1447069_at   | 0.97234 | Ring finger protein 43                                                                                                    | Rnf43         |
| 1447070_at   | 0.97595 | Williams-Beuren syndrome chromosome region 1 homolog (human)                                                              | Wbscr1        |
| 1447071_at   | 2.55847 | "Transcription factor 7-like 2, T-cell specific, HMG-box"                                                                 | Tcf712        |
| 1447072_at   | 0.87168 | GRIP1 associated protein 1                                                                                                | Gripap1       |
| 1447073_at   | 1.07374 | thyroid hormone receptor interactor 12                                                                                    | Trip12        |
| 1447074_at   | 0.86870 | zinc finger and BTB domain containing 24                                                                                  | Zbtb24        |
| 1447075_at   | 0.98936 | Class II transactivator C2ta                                                                                              |               |
| 1447076_at   | 0.95890 | NEL-like 1 (chicken)                                                                                                      | Nell1         |
| 1447077_at   | 0.87416 | Adducin 3 (gamma)                                                                                                         | Add3          |
| 1447078_at   | 1.01983 | ---                                                                                                                       | ---           |
| 1447079_at   | 1.00266 | ---                                                                                                                       | ---           |
| 1447080_at   | 1.04266 | ---                                                                                                                       | ---           |
| 1447081_at   | 0.96896 | ---                                                                                                                       | ---           |
| 1447082_at   | 0.99054 | hypothetical protein C630004L07                                                                                           | C630004L07    |
| 1447083_at   | 1.04972 | RIKEN cDNA 4933407I05 gene                                                                                                | 4933407I05Rik |

1447084\_at 1.02466 "nuclear factor of activated T-cells, cytoplasmic, calcineurin-dependent 1"  
Nfatc1  
1447085\_s\_at 0.90103 "nuclear factor of activated T-cells, cytoplasmic, calcineurin-dependent 1"  
Nfatc1  
1447086\_at 0.87710 SMC6 structural maintenance of chromosomes 6-like 1 (yeast) Smc6l1  
1447087\_at 1.02091 Cell growth regulator with ring finger domain 1 Cgrrf1  
1447088\_at 1.08811 Tweety homolog 2 (Drosophila) Ttyh2  
1447089\_at 1.00210 ADP-ribosylation factor-like 1 Arl1  
1447090\_s\_at 1.04845 ADP-ribosylation factor-like 1 Arl1  
1447091\_at 1.10053 Jumonji domain containing 2C Jmjd2c  
1447092\_at 0.99677 Platelet/endothelial cell adhesion molecule 1 Pecam1  
1447093\_at 0.93966 "Procollagen, type XXIV, alpha 1" Col24a1  
1447094\_at 1.10938 --- ---  
1447095\_at 0.83202 expressed sequence C86942 C86942  
1447096\_at 1.45040 Transcribed locus ---  
1447097\_at 0.98934 cDNA sequence BC052688 BC052688  
1447098\_at 1.01090 --- ---  
1447099\_at 1.00116 Rho GTPase-activating protein Grit  
1447100\_s\_at 1.03820 RIKEN cDNA 5730508B09 gene 5730508B09Rik  
1447101\_at 1.30923 ring finger protein 122 Rnf122  
1447102\_at 1.08080 Ninjurin 2 Ninj2  
1447103\_at 0.89359 CDK5 regulatory subunit associated protein 2 Cdk5rap2  
1447104\_at 0.99790 AT rich interactive domain 1A (Swi1 like) Arid1a  
1447105\_at 1.24888 Dephospho-CoA kinase domain containing Dcakd  
1447106\_at 1.04027 Leucine-rich repeat kinase 2 Lrrk2  
1447107\_at 1.08470 DEAD (Asp-Glu-Ala-Asp) box polypeptide 55 Ddx55  
1447108\_at 1.25151 RAD51-like 1 (S. cerevisiae) Rad51l1  
1447109\_at 1.61399 "ELAV (embryonic lethal, abnormal vision, Drosophila)-like 1 (Hu antigen  
R)" Elavl1  
1447110\_at 0.95991 RIKEN cDNA 4921513D23 gene 4921513D23Rik  
1447111\_at 1.03653 --- ---  
1447112\_s\_at 0.85148 "crystallin, lamda 1" Cry11  
1447113\_at 1.12789 --- ---  
1447114\_x\_at 1.14478 RIKEN cDNA 4930414L22 gene 4930414L22Rik  
1447115\_at 0.84194 Expressed sequence C78409 C78409  
1447116\_at 1.13113 "Presenilin associated, rhomboid-like" Parl  
1447117\_at 0.85167 "Catenin (cadherin associated protein), alpha 2" Ctnna2  
1447118\_at 1.01093 "SAPS domain family, member 3" Saps3  
1447119\_at 1.13068 "Transcription termination factor, RNA polymerase II" Ttf2  
1447120\_at 1.15389 Beta-transducin repeat containing protein Btrc  
1447121\_at 1.12255 RIKEN cDNA 0610038K03 gene 0610038K03Rik  
1447122\_at 1.28327 --- ---  
1447123\_at 0.92314 --- ---



1447124\_at 0.93444 Transcribed locus ---  
1447125\_at 0.93127 Keratin associated protein 5-5 Krtap5-5  
1447126\_at 0.96103 "Chromodomain protein, Y chromosome-like 2" Cdyl2  
1447127\_at 1.00634 "V-abl Abelson murine leukemia viral oncogene 2 (arg, Abelson-related gene)" Abl2  
1447128\_at 0.81805 Hypothetical LOC329575 LOC329575  
1447129\_at 0.96875 --- ---  
1447130\_at 1.05786 "DNA segment, Chr 8, Wayne State University 26, expressed" D8Wsu26e  
1447131\_at 0.94892 hypothetical protein LOC666453 /// hypothetical protein LOC671074 /// hypothetical protein LOC674374 LOC666453 /// LOC671074 /// LOC674374  
1447132\_at 1.04238 CDK5 regulatory subunit associated protein 1-like 1 Cdkal1  
1447133\_at 1.05683 --- ---  
1447134\_at 0.89137 SET domain containing 5 Setd5  
1447135\_at 1.08485 "Protein tyrosine phosphatase, receptor type, T" Ptprt  
1447136\_at 1.01140 Microtubule associated serine/threonine kinase-like Mastl  
1447137\_at 0.92478 RIKEN cDNA 4632417K18 gene 4632417K18Rik  
1447138\_at 0.95444 expressed sequence AI853502 AI853502  
1447139\_at 1.03117 B-cell CLL/lymphoma 7C Bcl7c  
1447140\_at 0.93346 hypothetical protein C130078N14 C130078N14  
1447141\_at 0.87631 expressed sequence AW107722 AW107722  
1447142\_at 1.02187 cathepsin 7 Cts7  
1447143\_at 1.45686 PHD finger protein 14 Phf14  
1447144\_at 0.91821 RIKEN cDNA 9130011E15 gene 9130011E15Rik  
1447145\_at 1.04000 --- ---  
1447146\_s\_at 0.92385 "DNA segment, Chr 11, ERATO Doi 730, expressed" D11Ertd730e  
1447147\_at 1.79008 Autophagy-related 7 (yeast) Atg7  
1447148\_at 1.05424 Transcribed locus ---  
1447149\_at 1.00567 --- ---  
1447150\_at 1.42503 "pam, highwire, rpm 1" Phr1  
1447151\_at 0.95237 RIKEN cDNA 4930519N13 gene 4930519N13Rik  
1447152\_at 1.06045 Unc-51 like kinase 2 (C. elegans) Ulk2  
1447153\_x\_at 1.21278 Unc-51 like kinase 2 (C. elegans) Ulk2  
1447154\_at 0.96385 "Calcium channel, voltage-dependent, beta 4 subunit" Cacnb4  
1447155\_at 1.14414 RIKEN cDNA D730039F16 gene D730039F16Rik  
1447156\_at 1.73596 Choroideremia Chm  
1447157\_at 0.90103 RIKEN cDNA 4930480K23 gene 4930480K23Rik  
1447158\_at 1.04462 --- ---  
1447159\_at 1.50956 Synaptic nuclear envelope 2 Syne2  
1447160\_at 1.07215 "non-POU-domain-containing, octamer binding protein /// hypothetical gene supported by AK004830; NM\_023144" Nono /// LOC382354  
1447161\_at 1.11123 Transcribed locus ---  
1447162\_at 0.98570 --- ---  
1447163\_x\_at 0.92053 --- ---

|              |         |                                                                                                                                                                 |                          |
|--------------|---------|-----------------------------------------------------------------------------------------------------------------------------------------------------------------|--------------------------|
| 1447164_at   | 1.19275 | Rearranged L-myc fusion sequence                                                                                                                                | Rlf                      |
| 1447165_at   | 1.52920 | Ankyrin repeat domain 12                                                                                                                                        | Ankrd12                  |
| 1447166_at   | 1.05523 | RIKEN cDNA E230002P03 gene                                                                                                                                      | E230002P03Rik            |
| 1447167_at   | 1.37986 | Expressed sequence AL033314                                                                                                                                     | AL033314                 |
| 1447168_at   | 0.94127 | Transcribed locus                                                                                                                                               | ---                      |
| 1447169_at   | 0.93892 | ---                                                                                                                                                             | ---                      |
| 1447170_at   | 1.08692 | ---                                                                                                                                                             | ---                      |
| 1447171_at   | 1.00906 | "Neural precursor cell expressed, developmentally down-regulated gene 4-like"                                                                                   | Nedd4l                   |
| 1447172_at   | 0.93269 | ---                                                                                                                                                             | ---                      |
| 1447173_at   | 0.94465 | "PREDICTED: Mus musculus hypothetical protein LOC624743 (LOC624743), mRNA"                                                                                      | ---                      |
| 1447174_at   | 1.04099 | Dachshund 1 (Drosophila)                                                                                                                                        | Dach1                    |
| 1447175_at   | 1.09673 | RIKEN cDNA 2610528M18 gene                                                                                                                                      | 2610528M18Rik            |
| 1447176_at   | 1.07300 | RIKEN cDNA A930008G19 gene                                                                                                                                      | A930008G19Rik            |
| 1447177_at   | 0.89514 | ---                                                                                                                                                             | ---                      |
| 1447178_at   | 0.92408 | ---                                                                                                                                                             | ---                      |
| 1447179_at   | 1.12364 | RIKEN cDNA 2210412D01 gene                                                                                                                                      | 2210412D01Rik            |
| 1447180_at   | 0.90607 | Transcribed locus                                                                                                                                               | ---                      |
| 1447181_s_at | 0.85193 | "solute carrier family 7 (cationic amino acid transporter, y+ system), member 7"                                                                                | Slc7a7                   |
| 1447182_at   | 1.01142 | expressed sequence C77815                                                                                                                                       | C77815                   |
| 1447183_at   | 0.99762 | Odd Oz/ten-m homolog 3 (Drosophila)                                                                                                                             | Odz3                     |
| 1447184_at   | 1.37569 | expressed sequence AU021760                                                                                                                                     | AU021760                 |
| 1447185_at   | 0.92842 | RIKEN cDNA 9330158H04 gene                                                                                                                                      | 9330158H04Rik            |
| 1447186_at   | 0.95479 | "solute carrier family 6, member 16 /// similar to Orphan sodium- and chloride-dependent neurotransmitter transporter NTT5 (Solute carrier family 6 member 16)" | Slc6a16 ///<br>LOC672880 |
| 1447187_at   | 1.10378 | Receptor interacting protein kinase 5                                                                                                                           | Ripk5                    |
| 1447188_at   | 0.87539 | Transcribed locus                                                                                                                                               | ---                      |
| 1447189_at   | 0.99135 | Glioma tumor suppressor candidate region gene 1                                                                                                                 | Gltscr1                  |
| 1447190_at   | 1.07885 | ---                                                                                                                                                             | ---                      |
| 1447191_at   | 1.00581 | ---                                                                                                                                                             | ---                      |
| 1447192_at   | 1.04722 | ---                                                                                                                                                             | ---                      |
| 1447193_at   | 0.88843 | ---                                                                                                                                                             | ---                      |
| 1447194_at   | 0.88729 | Transcribed locus                                                                                                                                               | ---                      |
| 1447195_at   | 1.27816 | Elongation protein 4 homolog (S. cerevisiae)                                                                                                                    | Elp4                     |
| 1447196_at   | 0.89444 | hypothetical protein LOC622866                                                                                                                                  | MGC58416                 |
| 1447197_at   | 1.06069 | expressed sequence C86544                                                                                                                                       | C86544                   |
| 1447198_at   | 1.05731 | RecQ protein-like                                                                                                                                               | Recql                    |
| 1447199_at   | 1.05340 | expressed sequence C80763                                                                                                                                       | C80763                   |
| 1447200_at   | 1.00341 | "TBC1 domain family, member 5"                                                                                                                                  | Tbc1d5                   |
| 1447201_at   | 0.96684 | ---                                                                                                                                                             | ---                      |

1447202\_at 1.02177 RIKEN cDNA 1200009F10 gene 1200009F10Rik  
1447203\_at 0.90331 --- ---  
1447204\_at 0.88511 Mitogen-activated protein kinase kinase kinase kinase 5 Map4k5  
1447205\_x\_at 1.10850 ribosomal protein S12 /// similar to ribosomal protein S12 /// similar to  
ribosomal protein S12 /// similar to ribosomal protein S12 /// similar to ribosomal protein S12 /// similar  
to ribosomal protein S12 /// similar to ribosomal protein S12 /// similar to ribosomal protein S12 ///  
similar to ribosomal protein S12 /// similar to ribosomal protein S12 /// similar to ribosomal protein  
S12 /// similar to ribosomal protein S12 /// similar to ribosomal protein S12 /// similar to ribosomal  
protein S12 /// similar to ribosomal protein S12 /// similar to 40S ribosomal protein S12 /// similar to  
ribosomal protein S12 /// similar to ribosomal protein S12 /// similar to ribosomal protein S12 /// similar  
to ribosomal protein S12 Rps12 /// LOC432865 /// LOC434843 /// LOC546371 /// LOC626048 ///  
LOC627835 /// LOC665463 /// LOC665501 /// LOC665522 /// LOC665555 /// LOC665579 ///  
LOC665611 /// LOC668354 /// LOC670751 /// LOC670832 /// LOC671641 /// LOC672008 ///  
LOC672415 /// LOC673522 /// LOC676277  
1447206\_at 1.43075 Rho GTPase activating protein 21 Arhgap21  
1447207\_at 0.95755 RIKEN cDNA 2810482G21 gene 2810482G21Rik  
1447208\_at 1.05472 Transcribed locus ---  
1447209\_at 1.36770 Forkhead box P1 Foxp1  
1447210\_at 1.13876 Transcribed locus ---  
1447211\_at 0.93673 nuclear receptor interacting protein 1 Nrip1  
1447212\_at 1.00409 "CCR4-NOT transcription complex, subunit 2" Cnot2  
1447213\_at 1.02063 Nuclear antigen Sp100 Sp100  
1447214\_at 0.98197 hypothetical protein LOC666827 /// hypothetical protein LOC670370 ///  
hypothetical protein LOC674049 /// hypothetical protein LOC676969 LOC666827 ///  
LOC670370 /// LOC674049 /// LOC676969  
1447215\_at 0.92311 WD repeat domain 66 Wdr66  
1447216\_at 1.00403 neurexin I Nrnx1  
1447217\_at 1.18821 "ubiquitin-like, containing PHD and RING finger domains 2" Uhrf2  
1447218\_at 1.23338 RIKEN cDNA 1110003F02 gene 1110003F02Rik  
1447219\_at 0.85263 Transcribed locus ---  
1447220\_at 1.14698 RIKEN cDNA 1700125H20 gene 1700125H20Rik  
1447221\_x\_at 0.96996 Fibroblast growth factor 14 Fgf14  
1447222\_at 0.87130 heat shock protein 12A Hspa12a  
1447223\_at 1.00870 Transcribed locus ---  
1447224\_at 0.97083 Transcribed locus ---  
1447225\_at 0.83789 "solute carrier family 16 (monocarboxylic acid transporters), member 5" Slc16a5  
1447226\_at 1.09984 --- ---  
1447227\_at 0.93106 "Solute carrier family 40 (iron-regulated transporter), member 1" Slc40a1  
1447228\_at 0.91637 RIKEN cDNA 1110051M20 gene 1110051M20Rik  
1447229\_x\_at 0.99454 RIKEN cDNA 1110051M20 gene 1110051M20Rik  
1447230\_at 0.91493 Expressed sequence AI553587 AI553587  
1447231\_at 0.96789 "Solute carrier family 8 (sodium/calcium exchanger), member 1" Slc8a1  
1447232\_at 1.04369 --- ---

1447233\_at 0.98300 RIKEN cDNA D330027H18 gene D330027H18Rik  
 1447234\_s\_at 0.94556 sorting nexin 6 Snx6  
 1447235\_at 1.13614 SH3 domain containing ring finger 1 Sh3rf1  
 1447236\_at 1.04425 kinesin family member 21A Kif21a  
 1447237\_at 1.05947 "Phosphodiesterase 4B, cAMP specific" Pde4b  
 1447238\_at 0.94966 --- ---  
 1447239\_at 0.86160 Translocase of outer mitochondrial membrane 70 homolog A (yeast)  
 Tomm70a  
 1447240\_at 3.31804 --- ---  
 1447241\_at 1.10744 "H2A histone family, member Y2" H2afy2  
 1447242\_at 1.22562 "Presenilin associated, rhomboid-like" Parl  
 1447243\_at 1.09037 cDNA sequence BC040756 BC040756  
 1447244\_at 1.03774 "cytochrome b, ascorbate dependent 3" Cybasc3  
 1447245\_at 1.06835 Transcribed locus ---  
 1447246\_at 1.08853 "0 day neonate thymus cDNA, RIKEN full-length enriched library, clone:  
 A430092C21 product:hypothetical protein, full insert sequence" ---  
 1447247\_at 1.00088 "Protein phosphatase 1, regulatory subunit 9B" Ppp1r9b  
 1447248\_at 1.04898 "solute carrier family 39 (zinc transporter), member 12" Slc39a12  
 1447249\_at 0.96238 Transcribed locus ---  
 1447250\_a\_at 0.92222 RIKEN cDNA 2610301F02 gene 2610301F02Rik  
 1447251\_x\_at 1.00541 RIKEN cDNA 2610301F02 gene 2610301F02Rik  
 1447252\_s\_at 0.89849 mepirin 1 alpha Mep1a  
 1447253\_x\_at 1.01041 nucleoporin 54 Nup54  
 1447254\_at 1.06835 --- ---  
 1447255\_at 0.88538 RIKEN cDNA 2310015A10 gene 2310015A10Rik  
 1447256\_at 0.98046 "17 days embryo kidney cDNA, RIKEN full-length enriched library, clone:  
 I920178P20 product:unclassifiable, full insert sequence" ---  
 1447257\_at 1.11512 TAO kinase 3 Taok3  
 1447258\_at 1.34112 MYST histone acetyltransferase monocytic leukemia 4 Myst4  
 1447259\_at 0.96644 "ankyrin 3, epithelial" Ank3  
 1447260\_at 1.07107 "histocompatibility 2, blastocyst /// RIKEN cDNA 2410017I17 gene /// similar  
 to MHC class I antigen precursor /// MHC class I like protein GS17 /// similar to histocompatibility 2,  
 blastocyst /// similar to RT1 class Ia, locus A1 /// similar to RT1 class Ia, locus A1 /// hypothetical  
 protein LOC677505" H2-B1 /// 2410017I17Rik /// LOC547349 /// H2-gs17 /// LOC673639 ///  
 LOC674137 /// LOC676837 /// LOC677505  
 1447261\_at 0.92146 "PREDICTED: Mus musculus similar to CG12341-PA (LOC621976),  
 mRNA" ---  
 1447262\_at 0.97973 Transcribed locus ---  
 1447263\_at 1.57932 Methionine aminopeptidase 2 Metap2  
 1447264\_at 1.02653 RAB11 family interacting protein 1 (class I) Rab11fip1  
 1447265\_at 1.01841 expressed sequence AI848615 AI848615  
 1447266\_at 0.96459 "UTP18, small subunit (SSU) processome component, homolog (yeast)"  
 Utp18

|              |         |                                                                                                                                            |               |
|--------------|---------|--------------------------------------------------------------------------------------------------------------------------------------------|---------------|
| 1447267_at   | 0.95867 | expressed sequence C85319                                                                                                                  | C85319        |
| 1447268_at   | 1.16304 | nucleolar protein 12                                                                                                                       | Nol12         |
| 1447269_at   | 0.90611 | RIKEN cDNA 9630031F12 gene                                                                                                                 | 9630031F12Rik |
| 1447270_at   | 1.05969 | ---                                                                                                                                        | ---           |
| 1447271_at   | 0.93357 | non-catalytic region of tyrosine kinase adaptor protein 1                                                                                  | Nck1          |
| 1447272_s_at | 0.96665 | "ATPase, class V, type 10A"                                                                                                                | Atp10a        |
| 1447273_x_at | 0.94496 | "ATPase, class V, type 10A"                                                                                                                | Atp10a        |
| 1447274_at   | 1.18808 | Wiskott-Aldrich syndrome protein interacting protein                                                                                       | Waspip        |
| 1447275_at   | 0.96965 | "gene model 1805, (NCBI)"                                                                                                                  | Gm1805        |
| 1447276_at   | 1.00195 | "DNA segment, Chr 13, ERATO Doi 37, expressed"                                                                                             | D13Ert37e     |
| 1447277_s_at | 0.84098 | prenylcysteine oxidase 1                                                                                                                   | Pcyox1        |
| 1447278_at   | 1.04014 | centrosomal protein 164                                                                                                                    | Cep164        |
| 1447279_at   | 0.85284 | Transcribed locus                                                                                                                          | ---           |
| 1447280_at   | 0.95944 | Dystrobrevin alpha                                                                                                                         | Dtna          |
| 1447281_at   | 0.86804 | ---                                                                                                                                        | ---           |
| 1447282_at   | 0.98521 | ---                                                                                                                                        | ---           |
| 1447283_at   | 0.98405 | testis specific 10                                                                                                                         | Tsga10        |
| 1447284_at   | 1.01542 | triggering receptor expressed on myeloid cells 1                                                                                           | Trem1         |
| 1447285_at   | 1.00773 | ---                                                                                                                                        | ---           |
| 1447286_at   | 1.01461 | Embigin                                                                                                                                    | Emb           |
| 1447287_at   | 1.11550 | expressed sequence C77137                                                                                                                  | C77137        |
| 1447288_at   | 1.00612 | Transcribed locus                                                                                                                          | ---           |
| 1447289_at   | 0.97128 | expressed sequence AA763521                                                                                                                | AA763521      |
| 1447290_at   | 1.09927 | RIKEN cDNA 2610042O14 gene                                                                                                                 | 2610042O14Rik |
| 1447291_at   | 1.05135 | "nephrosis 1 homolog, nephrin antisense"                                                                                                   | Nphs1as       |
| 1447292_at   | 1.08060 | ARP1 actin-related protein 1 homolog B (yeast)                                                                                             | Actr1b        |
| 1447293_x_at | 1.02705 | ARP1 actin-related protein 1 homolog B (yeast)                                                                                             | Actr1b        |
| 1447294_at   | 1.22273 | F-box and WD-40 domain protein 11                                                                                                          | Fbxw11        |
| 1447295_at   | 1.66168 | Cut-like 1 (Drosophila)                                                                                                                    | Cutl1         |
| 1447296_at   | 0.95670 | F-box protein 27                                                                                                                           | Fbxo27        |
| 1447297_at   | 0.97209 | "Solute carrier family 25, member 36"                                                                                                      | Slc25a36      |
| 1447298_at   | 0.97052 | RIKEN cDNA C130071C03 gene                                                                                                                 | C130071C03Rik |
| 1447299_at   | 0.92428 | ---                                                                                                                                        | ---           |
| 1447300_at   | 0.91227 | expressed sequence AW551984                                                                                                                | AW551984      |
| 1447301_at   | 1.04708 | A kinase (PRKA) anchor protein 5                                                                                                           | Akap5         |
| 1447302_at   | 1.01484 | Transcribed locus                                                                                                                          | ---           |
| 1447303_at   | 1.01903 | ---                                                                                                                                        | ---           |
| 1447304_at   | 0.83411 | "Mammary gland RCB-0527 Jyg-MC(B) cDNA, RIKEN full-length enriched library, clone:G930010E14 product:unclassifiable, full insert sequence" | ---           |
| 1447305_at   | 0.96391 | T-cell lymphoma breakpoint associated target 1                                                                                             | Tcba1         |
| 1447306_at   | 1.11665 | RIKEN cDNA 4930545H06 gene                                                                                                                 | 4930545H06Rik |
| 1447307_at   | 1.03350 | Transcribed locus                                                                                                                          | ---           |
| 1447308_at   | 0.97228 | longevity assurance homolog 5 (S. cerevisiae)                                                                                              | Lass5         |

1447309\_at 1.05523 "Adult male testis cDNA, RIKEN full-length enriched library, clone:4930539H17 product:unclassifiable, full insert sequence" ---  
1447310\_at 1.06320 RIKEN cDNA C630028N24 gene C630028N24Rik  
1447311\_at 1.03955 "solute carrier family 6 (neurotransmitter transporter, noradrenalin), member 2" Slc6a2  
1447312\_at 1.23884 Ankyrin repeat and IBR domain containing 1 Ankib1  
1447313\_at 1.06334 --- ---  
1447314\_at 1.02292 "Transforming growth factor, beta receptor III" Tgfb3  
1447315\_at 1.04699 --- ---  
1447316\_at 0.98795 Transcribed locus ---  
1447317\_at 0.85991 Transcribed locus ---  
1447318\_at 0.88268 UDP-N-acetyl-alpha-D-galactosamine:polypeptide N-acetylgalactosaminyltransferase 4 Galnt4  
1447319\_at 0.91139 --- ---  
1447320\_x\_at 1.05437 RNA polymerase 1-3 Rpo1-3  
1447321\_at 0.95361 "Amyotrophic lateral sclerosis 2 (juvenile) chromosome region, candidate 19 (human)" Als2cr19  
1447322\_at 1.00796 --- ---  
1447323\_at 1.01368 Hypothetical protein LOC621954 LOC621954  
1447324\_at 1.06484 --- ---  
1447325\_at 1.06706 Checkpoint suppressor 1 Ches1  
1447326\_s\_at 0.74285 "zinc finger, MYM-type 3" Zmym3  
1447327\_at 0.84777 --- ---  
1447328\_at 0.87099 "Inositol 1,4,5-triphosphate receptor 2" Itpr2  
1447329\_at 1.04304 --- ---  
1447330\_at 0.97334 zinc finger and BTB domain containing 32 Zbtb32  
1447331\_at 0.97282 F-box protein 42 Fbxo42  
1447332\_at 0.86998 expressed sequence C86896 C86896  
1447333\_at 0.99668 "Solute carrier family 11 (proton-coupled divalent metal ion transporters), member 2" Slc11a2  
1447334\_at 1.13863 B-cell CLL/lymphoma 11A (zinc finger protein) Bcl11a  
1447335\_x\_at 1.04044 B-cell CLL/lymphoma 11A (zinc finger protein) Bcl11a  
1447336\_at 0.79071 "Adult male kidney cDNA, RIKEN full-length enriched library, clone: F530012N16 product:hypothetical protein, full insert sequence" ---  
1447337\_at 1.13774 Dual adaptor for phosphotyrosine and 3-phosphoinositides 1 Dapp1  
1447338\_at 0.95609 Transcribed locus ---  
1447339\_at 0.94844 Transcribed locus ---  
1447340\_at 0.90270 "Adult male kidney cDNA, RIKEN full-length enriched library, clone: F530214C21 product:unclassifiable, full insert sequence" ---  
1447341\_at 1.06587 "DNA segment, Chr 12, ERATO Doi 551, expressed" D12Ert551e  
1447342\_at 1.07578 --- ---  
1447343\_at 1.11856 --- ---  
1447344\_at 0.84487 Transcribed locus ---

1447345\_at 0.99944 RIKEN cDNA A430107O13 gene A430107O13Rik  
1447346\_s\_at 1.03486 RIKEN cDNA 5530400B01 gene 5530400B01Rik  
1447347\_at 0.97505 Amyloid beta (A4) precursor protein App  
1447348\_at 1.09215 Wiskott-Aldrich syndrome protein interacting protein Waspip  
1447349\_s\_at 1.00371 E1A binding protein p400 Ep400  
1447350\_at 1.05289 --- ---  
1447351\_x\_at 1.09533 --- ---  
1447352\_at 0.97901 "8 days neonate male testis cDNA, RIKEN full-length enriched library, clone:  
G630041I22 product:unclassifiable, full insert sequence" ---  
1447353\_at 1.09764 G protein-coupled receptor 161 Gpr161  
1447354\_at 0.95857 Centrosomal protein 164 Cep164  
1447355\_at 0.99115 acyl-CoA synthetase long-chain family member 1 Acs11  
1447356\_at 0.93492 UbiE-YGHL1 fusion protein LOC554292  
1447357\_at 0.88306 --- ---  
1447358\_at 0.96349 expressed sequence C87198 C87198  
1447359\_at 0.97755 zinc finger protein 575 Zfp575  
1447360\_at 1.01805 "TSC22 domain family, member 1" Tsc22d1  
1447361\_at 0.99940 Metaxin 1 Mtx1  
1447362\_at 1.02465 "budding uninhibited by benzimidazoles 1 homolog, beta (S. cerevisiae)" Bub1b  
1447363\_s\_at 0.93798 "budding uninhibited by benzimidazoles 1 homolog, beta (S. cerevisiae)"  
Bub1b  
1447364\_x\_at 0.93018 myosin IB Myo1b  
1447365\_at 0.89869 Transcribed locus ---  
1447366\_at 1.08945 --- ---  
1447367\_at 0.96296 sec1 family domain containing 2 Scfd2  
1447368\_at 0.87849 RIKEN cDNA 6430706D22 gene 6430706D22Rik  
1447369\_at 1.00392 RIKEN cDNA 1190005F20 gene 1190005F20Rik  
1447370\_at 1.09957 Transmembrane protein 16A Tmem16a  
1447371\_at 0.88853 --- ---  
1447372\_at 1.00810 "aldehyde dehydrogenase 16 family, member A1" Aldh16a1  
1447373\_at 1.02173 RIKEN cDNA 1810015C04 gene 1810015C04Rik  
1447374\_at 0.95110 Ubiquitin-conjugating enzyme E2H Ube2h  
1447375\_at 0.97439 Transcribed locus ---  
1447376\_at 0.92595 Moloney leukemia virus 10 Mov10  
1447377\_at 0.86108 "gene model 428, (NCBI) /// hypothetical LOC623180 /// hypothetical  
LOC623197 /// hypothetical LOC623210 /// hypothetical LOC623219" Gm428 /// LOC623180 ///  
LOC623197 /// LOC623210 /// LOC623219  
1447378\_at 1.06798 "PREDICTED: Mus musculus hypothetical protein LOC628013 (LOC628013),  
mRNA" ---  
1447379\_at 1.05723 SAP30-like Sap30l  
1447380\_at 0.97322 amidohydrolase domain containing 1 Amdhd1  
1447381\_at 1.07369 Cleavage and polyadenylation specific factor 6 Cpsf6  
1447382\_at 1.13344 "phosphatidylinositol glycan anchor biosynthesis, class T" Pigt

1447383\_at 0.99292 CDNA sequence BC005471 BC005471  
1447384\_at 1.02779 "ATP-binding cassette, sub-family C (CFTR/MRP), member 5" Abcc5  
1447385\_at 0.89596 "Adult male corpora quadrigemina cDNA, RIKEN full-length enriched library, clone:B230036G05 product:unclassifiable, full insert sequence" ---  
1447386\_at 1.02536 Ubiquitin specific peptidase 8 Usp8  
1447387\_at 1.00031 --- ---  
1447388\_at 0.85647 RIKEN cDNA 5830484A20 gene 5830484A20Rik  
1447389\_at 1.10083 expressed sequence AI662168 AI662168  
1447390\_at 1.14407 --- ---  
1447391\_at 1.07023 RUN and FYVE domain containing 1 Rufy1  
1447392\_s\_at 0.81359 carboxypeptidase D Cpd  
1447393\_at 1.13650 "PREDICTED: Mus musculus hypothetical LOC434436 (LOC434436), mRNA" ---  
1447394\_at 1.07802 chloride channel calcium activated 6 /// expressed sequence AI747448 /// similar to chloride channel calcium activated 6 Clca6 /// AI747448 /// LOC622139  
1447395\_at 1.01934 RIKEN cDNA 4930525K10 gene 4930525K10Rik  
1447396\_at 1.06766 Hypothetical protein LOC545253 LOC545253  
1447397\_at 0.98850 RIKEN cDNA 1700129I04 gene 1700129I04Rik  
1447398\_at 0.99672 --- ---  
1447399\_at 1.12248 RIKEN cDNA A330019N05 gene A330019N05Rik  
1447400\_at 0.89827 receptor-like tyrosine kinase Ryk  
1447401\_at 0.92883 WW domain binding protein 11 Wbp11  
1447402\_at 1.14667 Transcribed locus ---  
1447403\_a\_at 1.04970 "Zinc finger, MYND domain containing 19" Zmynd19  
1447404\_at 0.95780 "Gene model 96, (NCBI)" Gm96  
1447405\_at 0.89920 Expressed sequence AI449023 AI449023  
1447406\_at 1.00610 "PREDICTED: Mus musculus similar to Hemoglobin alpha subunit (Hemoglobin alpha chain) (Alpha-globin) (LOC383229), mRNA" ---  
1447407\_at 1.06621 "centaurin, delta 3" Centd3  
1447408\_at 3.04457 Nipped-B homolog (Drosophila) Nipbl  
1447409\_at 1.03844 --- ---  
1447410\_at 0.97003 --- ---  
1447411\_at 1.51251 UDP-glucose dehydrogenase Ugdh  
1447412\_at 0.88782 "gene model 996, (NCBI)" Gm996  
1447413\_at 1.01928 RIKEN cDNA 1110001A07 gene 1110001A07Rik  
1447414\_at 1.02697 --- ---  
1447415\_at 0.92202 --- ---  
1447416\_at 0.96117 "gene model 239, (NCBI)" Gm239  
1447417\_at 0.97870 "TAF1 RNA polymerase II, TATA box binding protein (TBP)-associated factor" Taf1  
1447418\_at 0.89502 "Potassium voltage-gated channel, subfamily Q, member 1" Kcnq1  
1447419\_at 0.86871 Transcribed locus ---  
1447420\_at 0.99416 bromodomain containing 1 Brd1



|              |         |                                                                                                                         |               |  |
|--------------|---------|-------------------------------------------------------------------------------------------------------------------------|---------------|--|
| 1447421_at   | 2.32708 | Transcribed locus                                                                                                       | ---           |  |
| 1447422_at   | 1.03109 | GTPase activating RANGAP domain-like 1                                                                                  | Garnl1        |  |
| 1447423_at   | 1.06210 | ---                                                                                                                     | ---           |  |
| 1447424_at   | 1.05686 | ---                                                                                                                     | ---           |  |
| 1447425_at   | 0.97126 | RIKEN cDNA 2900093B09 gene                                                                                              | 2900093B09Rik |  |
| 1447426_at   | 1.14498 | Dip3 beta                                                                                                               | Dip3b         |  |
| 1447427_at   | 1.04823 | "PREDICTED: Mus musculus similar to developmentally regulated repeat element-containing transcript 1 (LOC622619), mRNA" | ---           |  |
| 1447428_at   | 0.93198 | ---                                                                                                                     | ---           |  |
| 1447429_at   | 1.11091 | Transcribed locus                                                                                                       | ---           |  |
| 1447430_at   | 0.98953 | Transcribed locus                                                                                                       | ---           |  |
| 1447431_at   | 0.93045 | 2-deoxyribose-5-phosphate aldolase homolog (C. elegans)                                                                 | Dera          |  |
| 1447432_s_at | 1.00677 | zinc finger protein 263                                                                                                 | Zfp263        |  |
| 1447433_at   | 1.02404 | WD repeat and FYVE domain containing 3                                                                                  | Wdfy3         |  |
| 1447434_at   | 0.93227 | Cyclin D3                                                                                                               | Ccnd3         |  |
| 1447435_at   | 0.89212 | ---                                                                                                                     | ---           |  |
| 1447436_at   | 0.98698 | expressed sequence AI451250                                                                                             | AI451250      |  |
| 1447437_at   | 0.94380 | Acyl-CoA synthetase medium-chain family member 1                                                                        | Acsm1         |  |
| 1447438_at   | 1.09199 | Whirlin                                                                                                                 | Whrn          |  |
| 1447439_at   | 1.02305 | ---                                                                                                                     | ---           |  |
| 1447440_at   | 0.92354 | Nuclear transport factor 2                                                                                              | Nutf2         |  |
| 1447441_at   | 0.88300 | Rho guanine nucleotide exchange factor (GEF) 17                                                                         | Arhgef17      |  |
| 1447442_at   | 0.90551 | Helicase with zinc finger domain                                                                                        | Helz          |  |
| 1447443_at   | 0.98294 | "Sparc/osteonectin, cwcv and kazal-like domains proteoglycan 2"                                                         | Spock2        |  |
| 1447444_at   | 0.98862 | UBX domain containing 5                                                                                                 | Ubx5          |  |
| 1447445_at   | 1.11590 | Transcribed locus                                                                                                       | ---           |  |
| 1447446_at   | 0.88973 | "RAS-like, estrogen-regulated, growth-inhibitor"                                                                        | Rerg          |  |
| 1447447_s_at | 1.03693 | serine/arginine repetitive matrix 1                                                                                     | Srrm1         |  |
| 1447448_s_at | 1.12453 | Kruppel-like factor 6                                                                                                   | Klf6          |  |
| 1447449_at   | 0.99276 | ---                                                                                                                     | ---           |  |
| 1447450_at   | 1.28660 | Peroxisome proliferator activated receptor binding protein                                                              | Pparbp        |  |
| 1447451_at   | 1.04112 | RIKEN cDNA 4930556M19 gene                                                                                              | 4930556M19Rik |  |
| 1447452_at   | 1.00661 | ---                                                                                                                     | ---           |  |
| 1447453_x_at | 1.09524 | RIKEN cDNA A230083H22 gene                                                                                              | A230083H22Rik |  |
| 1447454_at   | 1.06017 | Kinesin family member 5C                                                                                                | Kif5c         |  |
| 1447455_at   | 0.99008 | ---                                                                                                                     | ---           |  |
| 1447456_x_at | 0.88386 | similar to common salivary protein 1                                                                                    | LOC671351     |  |
| 1447457_at   | 1.03476 | "Protein kinase inhibitor, gamma"                                                                                       | Pkig          |  |
| 1447458_at   | 0.92677 | "ST3 beta-galactoside alpha-2,3-sialyltransferase 4"                                                                    | St3gal4       |  |
| 1447459_at   | 1.24730 | Apoptosis antagonizing transcription factor                                                                             | Aatf          |  |
| 1447460_at   | 0.95565 | Ribosomal protein L5                                                                                                    | Rpl5          |  |
| 1447461_at   | 0.91221 | ---                                                                                                                     | ---           |  |
| 1447462_at   | 1.06298 | "DNA segment, Chr 7, Wayne State University 130, expressed"                                                             | D7Wsu130e     |  |

1447463\_at 1.08549 --- ---  
1447464\_at 0.93588 ankyrin repeat and sterile alpha motif domain containing 1B Anks1b  
1447465\_at 0.89867 RIKEN cDNA 4930558N01 gene 4930558N01Rik  
1447466\_at 0.97714 PRP40 pre-mRNA processing factor 40 homolog A (yeast) Prpf40a  
1447467\_at 0.97532 "protein tyrosine phosphatase, receptor type, A" Ptpra  
1447468\_at 1.12969 Transcribed locus ---  
1447469\_at 0.90700 coiled-coil domain containing 66 Ccdc66  
1447470\_at 0.99488 haloacid dehalogenase-like hydrolase domain containing 2 Hdhd2  
1447471\_at 1.02670 "Mammary gland RCB-0527 Jyg-MC(B) cDNA, RIKEN full-length enriched library, clone:G930010E14 product:unclassifiable, full insert sequence" ---  
1447472\_at 1.01244 Transcribed locus ---  
1447473\_at 1.08092 Transcribed locus ---  
1447474\_at 1.03301 Receptor (calcitonin) activity modifying protein 1 Ramp1  
1447475\_at 0.76726 "gene model 967, (NCBI)" Gm967  
1447476\_at 1.02373 "ATP-binding cassette, sub-family C (CFTR/MRP), member 10" Abcc10  
1447477\_at 0.93555 RIKEN cDNA 3110006E14 gene 3110006E14Rik  
1447478\_at 1.07822 "RAN, member RAS oncogene family" Ran  
1447479\_at 0.93203 --- ---  
1447480\_at 1.01569 Fibroblast growth factor 14 Fgf14  
1447481\_at 1.43975 SET domain containing 5 Setd5  
1447482\_at 1.03284 RIKEN cDNA 5830457H20 gene 5830457H20Rik  
1447483\_s\_at 0.98082 RIKEN cDNA 2610002F03 gene 2610002F03Rik  
1447484\_x\_at 1.10611 RIKEN cDNA 2610002F03 gene 2610002F03Rik  
1447485\_at 1.01299 G protein-coupled receptor 150 Gpr150  
1447486\_at 1.00981 "protein phosphatase 1, regulatory subunit 9B" Ppp1r9b  
1447487\_at 0.98361 --- ---  
1447488\_at 1.00778 RIKEN cDNA E130016E03 gene E130016E03Rik  
1447489\_at 0.94167 RIKEN cDNA 1110039B18 gene 1110039B18Rik  
1447490\_at 0.95966 Transcribed locus ---  
1447491\_at 1.31633 Leucine rich repeat containing 8D Lrrc8d  
1447492\_at 0.96085 --- ---  
1447493\_at 0.91935 RIKEN cDNA A530088H08 gene A530088H08Rik  
1447494\_at 0.97423 "DNA segment, Chr 7, Brigham & Women's Genetics 0826 expressed" D7Bwg0826e  
1447495\_at 0.94640 fibronectin type 3 and ankyrin repeat domains 1 Fank1  
1447496\_s\_at 0.99833 fibronectin type 3 and ankyrin repeat domains 1 Fank1  
1447497\_at 0.97907 "RAB21, member RAS oncogene family" Rab21  
1447498\_at 0.98881 ectodysplasin-A receptor /// similar to Tumor necrosis factor receptor superfamily member EDAR precursor (Anhidrotic ectodysplasin receptor 1) (Ectodysplasin-A receptor) (Ectodermal dysplasia receptor) (Downless) Edar /// LOC669001  
1447499\_s\_at 0.97528 "oocyte maturation, alpha /// oocyte maturation, beta /// similar to oocyte maturation, beta" Omt2a /// Omt2b /// LOC640894  
1447500\_at 0.92925 cut-like 2 (Drosophila) Cutl2

|              |         |                                                                          |               |        |
|--------------|---------|--------------------------------------------------------------------------|---------------|--------|
| 1447501_at   | 1.03393 | Transcribed locus                                                        | ---           |        |
| 1447502_at   | 1.00114 | Cytidine monophospho-N-acetylneuraminic acid hydroxylase                 |               | Cmah   |
| 1447503_at   | 1.12116 | CDNA sequence BC016495                                                   | BC016495      |        |
| 1447504_at   | 1.16284 | Growth hormone inducible transmembrane protein                           | Ghitm         |        |
| 1447505_at   | 0.98230 | RIKEN cDNA 1700020G03 gene                                               | 1700020G03Rik |        |
| 1447506_at   | 1.00891 | ---                                                                      | ---           |        |
| 1447507_at   | 0.92263 | expressed sequence C80406                                                | C80406        |        |
| 1447508_at   | 1.12476 | Transcribed locus                                                        | ---           |        |
| 1447509_at   | 0.91402 | RIKEN cDNA 1810057P16 gene                                               | 1810057P16Rik |        |
| 1447510_at   | 1.52881 | RIKEN cDNA C530014P21 gene                                               | C530014P21Rik |        |
| 1447511_at   | 0.99519 | Transcribed locus                                                        | ---           |        |
| 1447512_at   | 1.00303 | Cell adhesion molecule with homology to L1CAM                            | Chl1          |        |
| 1447513_at   | 0.95216 | "potassium voltage-gated channel, Shal-related family, member 3"         |               | Kcnd3  |
| 1447514_at   | 0.95119 | RIKEN cDNA D030041N04 gene                                               | D030041N04Rik |        |
| 1447515_at   | 1.06456 | Transcribed locus                                                        | ---           |        |
| 1447516_at   | 0.93207 | Transcribed locus                                                        | ---           |        |
| 1447517_at   | 2.11044 | superkiller viralicidic activity 2-like 2 ( <i>S. cerevisiae</i> )       | Skiv2I2       |        |
| 1447518_at   | 0.94024 | "TPX2, microtubule-associated protein homolog ( <i>Xenopus laevis</i> )" | Tpx2          |        |
| 1447519_x_at | 0.99437 | "TPX2, microtubule-associated protein homolog ( <i>Xenopus laevis</i> )" | Tpx2          |        |
| 1447520_at   | 1.21563 | ---                                                                      | ---           |        |
| 1447521_x_at | 1.00311 | "DNA segment, Chr 15, Wayne State University 169, expressed"             |               |        |
| D15Wsu169e   |         |                                                                          |               |        |
| 1447522_s_at | 0.94631 | "tankyrase, TRF1-interacting ankyrin-related ADP-ribose polymerase 2"    |               |        |
| Tnks2        |         |                                                                          |               |        |
| 1447523_at   | 1.07432 | Zinc finger protein 294                                                  | Zfp294        |        |
| 1447524_at   | 1.03948 | "adaptor-related protein complex 3, mu 2 subunit"                        | Ap3m2         |        |
| 1447525_at   | 0.95609 | Intraflagellar transport 172 homolog ( <i>Chlamydomonas</i> )            | Ift172        |        |
| 1447526_at   | 1.09375 | "DNA segment, Chr 5, ERATO Doi 255, expressed"                           | D5Ert255e     |        |
| 1447527_at   | 1.37859 | Interferon regulatory factor 2                                           | Irf2          |        |
| 1447528_at   | 1.09527 | ---                                                                      | ---           |        |
| 1447529_at   | 0.93084 | ---                                                                      | ---           |        |
| 1447530_at   | 0.99272 | Factor 8-associated gene A                                               | F8a           |        |
| 1447531_x_at | 0.99042 | ---                                                                      | ---           |        |
| 1447532_at   | 0.96053 | RIKEN cDNA 1700025G04 gene                                               | 1700025G04Rik |        |
| 1447533_at   | 1.08668 | Transcribed locus                                                        | ---           |        |
| 1447534_at   | 1.12562 | ---                                                                      | ---           |        |
| 1447535_at   | 0.96746 | BTB (POZ) domain containing 4                                            | Btbd4         |        |
| 1447536_at   | 0.98122 | "LysM, putative peptidoglycan-binding, domain containing 2"              |               | Lysmd2 |
| 1447537_at   | 1.26556 | RIKEN cDNA 1500032P08 gene                                               | 1500032P08Rik |        |
| 1447538_at   | 1.01177 | CREB regulated transcription coactivator 1                               | Crtc1         |        |
| 1447539_at   | 0.97420 | Transcribed locus                                                        | ---           |        |
| 1447540_at   | 0.94610 | tigger transposable element derived 3                                    | Tigd3         |        |
| 1447541_s_at | 0.82180 | "integrin, alpha E, epithelial-associated"                               |               | Itgae  |

|              |         |                                                                   |               |           |
|--------------|---------|-------------------------------------------------------------------|---------------|-----------|
| 1447542_at   | 1.02082 | cDNA sequence AY702102                                            | AY702102      |           |
| 1447543_at   | 0.91931 | WD repeat and FYVE domain containing 1                            | Wdfy1         |           |
| 1447544_at   | 1.00478 | Transcribed locus                                                 | ---           |           |
| 1447545_at   | 1.11670 | "DNA segment, Chr 7, ERATO Doi 193, expressed"                    | D7Ertd193e    |           |
| 1447546_s_at | 1.32247 | Mastermind like 2 (Drosophila)                                    | Maml2         |           |
| 1447547_at   | 0.96647 | latent transforming growth factor beta binding protein 1          | Ltbp1         |           |
| 1447548_at   | 0.92892 | abhydrolase domain containing 5                                   | Abhd5         |           |
| 1447549_x_at | 1.04278 | ninjurin 1                                                        | Ninj1         |           |
| 1447550_at   | 1.09593 | hypothetical protein LOC666892                                    | LOC666892     | LOC671332 |
| 1447551_x_at | 0.85047 | latrophilin 3                                                     | Lphn3         |           |
| 1447552_s_at | 1.17620 | "Catenin (cadherin associated protein), delta 2"                  | Ctnnd2        |           |
| 1447553_x_at | 1.03488 | Resistance to inhibitors of cholinesterase 3 homolog (C. elegans) | Ric3          |           |
| 1447554_at   | 1.00046 | cDNA sequence BC031781                                            | BC031781      |           |
| 1447555_at   | 1.80876 | Utrophin                                                          | Utnr1         |           |
| 1447556_x_at | 1.09623 | RIKEN cDNA 1700094D03 gene                                        | 1700094D03Rik |           |
| 1447557_at   | 0.91254 | RAB interacting factor                                            | Rabif         |           |
| 1447558_at   | 0.91632 | ---                                                               | ---           |           |
| 1447559_at   | 1.10810 | expressed sequence AI834762                                       | AI834762      |           |
| 1447560_at   | 0.83517 | ---                                                               | ---           |           |
| 1447561_at   | 0.92407 | Transcribed locus                                                 | ---           |           |
| 1447562_at   | 0.94578 | forkhead box F2                                                   | Foxf2         |           |
| 1447563_at   | 0.91205 | ribosomal protein S3                                              | Rps3          |           |
| 1447564_x_at | 1.02437 | piwi-like homolog 4 (Drosophila)                                  | Piwil4        |           |
| 1447565_at   | 0.94638 | RIKEN cDNA 1700082C02 gene                                        | 1700082C02Rik |           |
| 1447566_at   | 0.87366 | Histone deacetylase 4                                             | Hdac4         |           |
| 1447567_at   | 1.26236 | RIKEN cDNA D130007H15 gene                                        | D130007H15Rik |           |
| 1447568_at   | 1.35506 | RIKEN cDNA 2010003O18 gene                                        | 2010003O18Rik |           |
| 1447569_at   | 0.93130 | RIKEN cDNA 1700081L11 gene                                        | 1700081L11Rik |           |
| 1447570_s_at | 1.06807 | A kinase (PRKA) anchor protein 10                                 | Akap10        |           |
| 1447571_at   | 1.03337 | "ELK4, member of ETS oncogene family"                             | Elk4          |           |
| 1447572_at   | 1.03782 | RIKEN cDNA 1700052I22 gene                                        | 1700052I22Rik |           |
| 1447573_at   | 0.89110 | "Solute carrier family 32 (GABA vesicular transporter), member 1" | Slc32a1       |           |
| 1447574_s_at | 1.04745 | "Solute carrier family 32 (GABA vesicular transporter), member 1" | Slc32a1       |           |
| 1447575_at   | 0.95775 | ---                                                               | ---           |           |
| 1447576_at   | 0.82775 | RIKEN cDNA 2010001K21 gene                                        | 2010001K21Rik |           |
| 1447577_x_at | 0.90458 | "propionyl-Coenzyme A carboxylase, alpha polypeptide"             | Pcca          |           |
| 1447578_at   | 0.95195 | RIKEN cDNA 1700084J12 gene                                        | 1700084J12Rik |           |
| 1447579_at   | 1.01208 | Reticulon 4 interacting protein 1                                 | Rtn4ip1       |           |
| 1447580_at   | 1.01448 | Transcribed locus                                                 | ---           |           |
| 1447581_at   | 0.92747 | RIKEN cDNA 3110050K21 gene                                        | 3110050K21Rik |           |
| 1447582_x_at | 0.93375 | "Adiponectin, C1Q and collagen domain containing"                 | Adipoq        |           |
| 1447583_x_at | 0.83793 | G protein-coupled receptor 30                                     | Gpr30         |           |

1447584\_s\_at 1.01511 myc target 1 Myct1  
1447585\_s\_at 1.06398 mitochondrial ribosomal protein S6 Mrps6  
1447586\_at 0.91229 chondroitin sulfate proteoglycan 2 Cspg2  
1447587\_at 0.82137 RIKEN cDNA G630024C07 gene G630024C07Rik  
1447588\_x\_at 0.99691 RIKEN cDNA G630024C07 gene G630024C07Rik  
1447589\_at 0.95192 "Protein phosphatase 4, regulatory subunit 1" Ppp4r1  
1447590\_at 0.97056 "Adult male bone cDNA, RIKEN full-length enriched library, clone:9830167D18 product:unclassifiable, full insert sequence" ---  
1447591\_x\_at 0.99852 RIKEN cDNA A830082N09 gene A830082N09Rik  
1447592\_at 0.94465 dopamine beta hydroxylase Dbh  
1447593\_x\_at 0.96691 "guanine nucleotide binding protein, alpha q polypeptide" Gnaq  
1447594\_at 0.96706 RIKEN cDNA 1810012K16 gene 1810012K16Rik  
1447595\_x\_at 0.93388 RIKEN cDNA 1810012K16 gene 1810012K16Rik  
1447596\_at 0.93133 Transcribed locus ---  
1447597\_at 1.05173 RNA polymerase 1-4 Rpo1-4  
1447598\_x\_at 1.26481 RNA polymerase 1-4 Rpo1-4  
1447599\_x\_at 1.00697 epsin 2 Epn2  
1447600\_at 1.05584 Tetraspanin 5 Tspan5  
1447601\_x\_at 1.01319 N-acetyltransferase 10 Nat10  
1447602\_x\_at 0.79863 sulfatase 2 Sulf2  
1447603\_x\_at 0.92615 RIKEN cDNA 1700027J05 gene 1700027J05Rik  
1447604\_at 1.06894 cDNA sequence BC053393 BC053393  
1447605\_at 0.99948 Zinc finger protein 457 Zfp457  
1447606\_x\_at 1.10036 aquaporin 11 Aqp11  
1447607\_at 0.94264 --- ---  
1447608\_x\_at 0.92591 BTB (POZ) domain containing 14A Btbd14a  
1447609\_at 1.08756 RIKEN cDNA 5730410E15 gene 5730410E15Rik  
1447610\_at 0.91034 transmembrane protein 34 Tmem34  
1447611\_at 0.98036 RIKEN cDNA 1700073E17 gene 1700073E17Rik  
1447612\_x\_at 0.94083 Jumonji domain containing 3 Jmjd3  
1447613\_at 0.97507 Guanosine diphosphate (GDP) dissociation inhibitor 1 Gdi1  
1447614\_at 0.96636 Schlafen 1 Slfn1  
1447615\_at 1.16073 Formin 1 Fmn1  
1447616\_at 0.97766 Transcribed locus ---  
1447617\_at 1.04981 cyclin-dependent kinase 2 Cdk2  
1447618\_at 1.03921 RIKEN cDNA B630019K06 gene B630019K06Rik  
1447619\_at 0.94882 RIKEN cDNA A830039H05 gene A830039H05Rik  
1447620\_at 0.95670 cappuccino Cno  
1447621\_s\_at 1.17192 RIKEN cDNA 2610307O08 gene 2610307O08Rik  
1447622\_at 0.98344 "Fc receptor, IgG, low affinity IIb" Fcgr2b  
1447623\_s\_at 0.87856 RIKEN cDNA C130009A20 gene C130009A20Rik  
1447624\_s\_at 0.90611 storkhead box 2 Stox2  
1447625\_at 0.90528 E2F transcription factor 5 E2f5

1447626\_x\_at 0.96862 AT rich interactive domain 3B (Bright like) Arid3b  
1447627\_at 0.88845 transmembrane protein 132E Tmem132e  
1447628\_x\_at 0.92497 mitochondrial ribosomal protein S5 Mrps5  
1447629\_at 1.03837 RIKEN cDNA 1810020G14 gene 1810020G14Rik  
1447630\_x\_at 0.94310 "guanine nucleotide binding protein, beta 5" Gnb5  
1447631\_at 2.16559 MYST histone acetyltransferase 2 Myst2  
1447632\_at 0.97536 "Fanconi anemia, complementation group C" Fance  
1447633\_x\_at 1.03813 Ubiquitin-conjugating enzyme E2L 6 Ube2l6  
1447634\_x\_at 0.81609 regulator of chromosome condensation (RCC1) and BTB (POZ) domain  
containing protein 2 Rcbtb2  
1447635\_at 1.03606 "protein kinase, cAMP dependent regulatory, type I, alpha" Prkar1a  
1447636\_x\_at 0.93785 transmembrane and coiled-coil domains 4 Tmco4  
1447637\_at 1.14274 RIKEN cDNA 2410018C17 gene 2410018C17Rik  
1447638\_at 1.01891 Arylformamidase Afmid  
1447639\_x\_at 1.07832 --- ---  
1447640\_s\_at 0.98454 pre B-cell leukemia transcription factor 3 Pbx3  
1447641\_at 0.92372 dystrophia myotonica-containing WD repeat motif Dmwd  
1447642\_x\_at 0.95296 dystrophia myotonica-containing WD repeat motif Dmwd  
1447643\_x\_at 1.07529 snail homolog 2 (Drosophila) Snai2  
1447644\_at 1.09002 Wingless-related MMTV integration site 5B Wnt5b  
1447645\_x\_at 1.01456 "potassium channel, subfamily K, member 13" Kcnk13  
1447646\_at 0.99928 HEAT repeat containing 2 Heatr2  
1447647\_at 1.00686 wingless-related MMTV integration site 7A Wnt7a  
1447648\_at 1.07931 RIKEN cDNA 1700021N20 gene 1700021N20Rik  
1447649\_x\_at 1.20702 "DnaJ (Hsp40) homolog, subfamily C, member 1" Dnajc1  
1447650\_at 1.00531 NMD3 homolog (S. cerevisiae) Nmd3  
1447651\_x\_at 1.03702 mitochondrial ribosomal protein L30 /// similar to mitochondrial ribosomal  
protein L30 /// similar to mitochondrial ribosomal protein L30 Mrpl30 /// LOC621542 /// LOC632468  
1447652\_at 1.02006 "solute carrier family 35, member A4 /// similar to solute carrier family 35,  
member A4" Slc35a4 /// LOC545750  
1447653\_x\_at 1.08285 ribosomal protein L24 /// similar to ribosomal protein L24 /// similar to  
ribosomal protein L24 /// similar to ribosomal protein L24 /// similar to ribosomal protein L24 /// similar  
to ribosomal protein L24 /// similar to ribosomal protein L24 /// similar to ribosomal protein L24  
Rpl24 /// LOC624993 /// LOC664869 /// LOC667996 /// LOC668829 /// LOC672138 /// LOC675789 ///  
LOC677192  
1447654\_at 0.95643 --- ---  
1447655\_x\_at 0.83669 SRY-box containing gene 6 Sox6  
1447656\_at 0.93904 "zinc finger, DHHC domain containing 17" Zdhhc17  
1447657\_s\_at 0.87670 synaptopodin 2-like Synpo2l  
1447658\_x\_at 0.98609 synaptopodin 2-like Synpo2l  
1447659\_x\_at 1.04103 "ATPase, H+ transporting, lysosomal V1 subunit H" Atp6v1h  
1447660\_at 0.83824 transducin (beta)-like 3 Tbl3  
1447661\_at 1.04485 Transcribed locus ---

1447662\_x\_at 0.92388 "DNA segment, Chr 18, ERATO Doi 653, expressed" D18Ert653e  
 1447663\_at 1.00422 A kinase (PRKA) anchor protein 13 Akap13  
 1447664\_x\_at 0.96205 expressed sequence AA986860 AA986860  
 1447665\_at 1.03789 leucine rich repeat neuronal 6C Lrrn6c  
 1447666\_x\_at 0.94525 similar to Protein C11orf51 /// similar to Protein HSPC020 LOC628119 ///  
 LOC638436  
 1447667\_x\_at 0.92421 mitogen activated protein kinase kinase kinase 4 Map3k4  
 1447668\_x\_at 1.04222 epidermal growth factor-containing fibulin-like extracellular matrix protein 2  
 Efemp2  
 1447669\_s\_at 1.11205 "guanine nucleotide binding protein (G protein), gamma 4 subunit" Gng4  
 1447670\_at 1.21070 "proteasome (prosome, macropain) 26S subunit, non-ATPase, 9" Psmd9  
 1447671\_x\_at 1.04685 F-box only protein 6b Fbxo6b  
 1447672\_x\_at 0.95153 protein serine kinase H1 Pskh1  
 1447673\_x\_at 1.07142 RIKEN cDNA 1700015C15 gene 1700015C15Rik  
 1447674\_at 0.98920 RIKEN cDNA 2900080J11 gene 2900080J11Rik  
 1447675\_x\_at 1.02947 myogenic differentiation 1 Myod1  
 1447676\_x\_at 0.87375 S100 calcium binding protein A16 S100a16  
 1447677\_x\_at 0.91316 histidyl tRNA synthetase 2 Hars2  
 1447678\_at 0.98015 Dehydrogenase/reductase (SDR family) member 10 Dhrs10  
 1447679\_s\_at 1.08328 "BMS1-like, ribosome assembly protein (yeast)" Bms1l  
 1447680\_at 1.00259 "Acidic (leucine-rich) nuclear phosphoprotein 32 family, member E" Anp32e  
 1447681\_x\_at 0.91238 Pentatricopeptide repeat domain 2 Ptdc2  
 1447682\_x\_at 0.92585 Tnf receptor-associated factor 5 /// similar to TNF receptor-associated factor  
 5 Traf5 /// LOC622602  
 1447683\_x\_at 1.22408 methyltransferase-like 1 Mettl1  
 1447684\_at 1.02009 Leucine zipper and CTNNBIP1 domain containing Lzic  
 1447685\_x\_at 1.05115 "E26 avian leukemia oncogene 2, 3' domain" Ets2  
 1447686\_at 1.01132 --- ---  
 1447687\_x\_at 1.00600 --- ---  
 1447688\_at 0.86417 "TBC1 domain family, member 20" Tbc1d20  
 1447689\_at 1.04663 G protein-coupled receptor associated sorting protein 1 Gprasp1  
 1447690\_at 0.99500 lipolysis stimulated lipoprotein receptor Lsr  
 1447691\_x\_at 2.46425 Bicaudal C homolog 1 (Drosophila) Bicc1  
 1447692\_x\_at 0.97667 mitogen-activated protein kinase kinase kinase 7 interacting protein 1  
 Map3k7ip1  
 1447693\_s\_at 0.80698 neogenin Neo1  
 1447694\_x\_at 0.99013 neogenin Neo1  
 1447695\_at 0.92451 RIKEN cDNA 2610035D17 gene 2610035D17Rik  
 1447696\_x\_at 0.95197 adenylate cyclase 5 Adcy5  
 1447697\_at 0.99888 Coiled-coil domain containing 40 Ccdc40  
 1447698\_x\_at 0.91800 --- ---  
 1447699\_at 1.01756 Mitogen-activated protein kinase kinase kinase 13 Map3k13  
 1447700\_x\_at 0.91044 synovial sarcoma translocation gene on chromosome 18-like 1 Ss18l1

1447701\_x\_at 0.83256 isocitrate dehydrogenase 3 (NAD+) alpha Idh3a  
1447702\_x\_at 1.12735 "immunoglobulin superfamily, member 1" Igsf1  
1447703\_x\_at 1.05257 zinc finger protein 593 Zfp593  
1447704\_s\_at 1.11664 RIKEN cDNA D530033C11 gene D530033C11Rik  
1447705\_at 0.79290 RIKEN cDNA 4833432M17 gene 4833432M17Rik  
1447706\_at 1.80579 --- ---  
1447707\_s\_at 0.90646 "phosphodiesterase 2A, cGMP-stimulated" Pde2a  
1447708\_x\_at 0.94302 "phosphodiesterase 2A, cGMP-stimulated" Pde2a  
1447709\_at 0.99155 Erythrocyte protein band 4.1-like 3 Epb4.113  
1447710\_at 0.91104 RIKEN cDNA 1700019P21 gene 1700019P21Rik  
1447711\_x\_at 0.97946 RIKEN cDNA 4933412E12 gene 4933412E12Rik  
1447712\_x\_at 1.12427 E1A binding protein p400 Ep400  
1447713\_at 1.08407 "tropomyosin 1, alpha" Tpm1  
1447714\_x\_at 0.93161 Transcribed locus ---  
1447715\_x\_at 0.93251 "peroxiredoxin 6, related sequence 1" Prdx6-rs1  
1447716\_x\_at 1.11850 RIKEN cDNA 6330442E10 gene 6330442E10Rik  
1447717\_x\_at 0.94708 neurensin 2 Nrsn2  
1447718\_at 1.04098 "phosphodiesterase 4B, cAMP specific" Pde4b  
1447719\_at 0.94035 Apolipoprotein H Apoh  
1447720\_x\_at 0.98531 "protein kinase, cAMP dependent, catalytic, alpha" Prkaca  
1447721\_at 1.04853 zinc finger and BTB domain containing 26 Zbtb26  
1447722\_at 0.97628 Transcribed locus ---  
1447723\_at 1.11088 "16 days neonate cerebellum cDNA, RIKEN full-length enriched library, clone:9630018J10 product:unclassifiable, full insert sequence" ---  
1447724\_x\_at 1.07395 Optic atrophy 3 (human) Opa3  
1447725\_at 1.03750 RIKEN cDNA C030034E14 gene C030034E14Rik  
1447726\_at 0.96131 RIKEN cDNA C030002E08 gene C030002E08Rik  
1447727\_at 0.87960 Aquaporin 3 Aqp3  
1447728\_x\_at 0.99325 heat shock protein 9A Hspa9a  
1447729\_s\_at 1.27933 RIKEN cDNA 1700036D21 gene 1700036D21Rik  
1447730\_at 1.05091 Sp2 transcription factor Sp2  
1447731\_at 0.89524 paternally expressed 3 Peg3  
1447732\_x\_at 1.04905 paternally expressed 3 Peg3  
1447733\_x\_at 0.95072 --- ---  
1447734\_x\_at 1.11799 "aldolase 1, A isoform /// similar to Fructose-bisphosphate aldolase A (Muscle-type aldolase) (Aldolase 1) /// similar to Fructose-bisphosphate aldolase A (Muscle-type aldolase) (Aldolase 1)" Aldoa /// LOC667483 /// LOC671023  
1447735\_x\_at 0.93572 ataxin 2 binding protein 1 A2bp1  
1447736\_at 0.92131 FK506 binding protein 5 Fkbp5  
1447737\_at 0.86920 "protein kinase, interferon inducible double stranded RNA dependent activator" Prkra  
1447738\_s\_at 0.85104 "ankyrin repeat domain 13 family, member D" Ankrd13d  
1447739\_x\_at 0.92705 kelch domain containing 4 /// hypothetical gene supported by NM\_145605



## Klhdc4 /// LOC384360

1447740\_at 1.14403 RIKEN cDNA 1700034J05 gene /// hypothetical protein LOC635035  
1700034J05Rik /// LOC635035

1447741\_x\_at 0.98649 "acyl-Coenzyme A dehydrogenase family, member 10" Acad10  
1447742\_at 1.01071 lysosomal-associated protein transmembrane 5 Laptm5  
1447743\_x\_at 0.80650 exostoses (multiple) 2 Ext2  
1447744\_s\_at 1.05783 --- ---  
1447745\_at 0.88844 aquaporin 4 Aqp4  
1447746\_at 0.95381 Leucine-rich repeats and calponin homology (CH) domain containing 1 Lrch1  
1447747\_x\_at 1.00636 Adenosine deaminase-like Adal  
1447748\_x\_at 0.89250 "solute carrier family 29 (nucleoside transporters), member 2" Slc29a2  
1447749\_at 0.85417 SET and MYND domain containing 5 Smyd5  
1447750\_x\_at 1.00591 NOP17 Nop17  
1447751\_x\_at 0.88066 "dihydrouridine synthase 2-like (SMM1, S. cerevisiae)" Dus21  
1447752\_x\_at 0.85293 developmentally regulated GTP binding protein 1 Drg1  
1447753\_at 0.92139 Cell division cycle 37 homolog (S. cerevisiae)-like 1 Cdc3711  
1447754\_x\_at 1.04482 THAP domain containing 4 Thap4  
1447755\_at 1.25799 Serine/arginine-rich protein specific kinase 2 Srpk2  
1447756\_x\_at 0.89865 "minichromosome maintenance deficient 6 (MIS5 homolog, S. pombe) (S. cerevisiae)" Mcm6  
1447757\_x\_at 0.84398 inositol polyphosphate-5-phosphatase F Inpp5f  
1447758\_x\_at 1.05418 MYST histone acetyltransferase monocytic leukemia 4 Myst4  
1447759\_x\_at 0.91068 coiled-coil domain containing 22 Ccdc22  
1447760\_x\_at 0.91183 ets homologous factor Ehf  
1447761\_x\_at 0.95540 "superoxide dismutase 1, soluble /// similar to Superoxide dismutase /// similar to Superoxide dismutase" Sod1 /// LOC545845 /// LOC667310  
1447762\_x\_at 1.02313 carbonic anhydrase 12 Car12  
1447763\_at 1.04924 --- ---  
1447764\_at 0.97454 "potassium voltage-gated channel, Shal-related family, member 2" Kcnd2  
1447765\_at 0.84960 WD repeat domain 48 Wdr48  
1447766\_x\_at 0.84267 LIM domain containing 2 /// similar to epithelial protein lost in neoplasm  
Limd2 /// LOC632329

1447767\_at 0.96145 Cyclin-dependent kinase-like 4 Cdk14  
1447768\_at 0.95609 "glutamate oxaloacetate transaminase 2, mitochondrial /// similar to Aspartate aminotransferase, mitochondrial precursor (Transaminase A) (Glutamate oxaloacetate transaminase 2)" Got2 /// LOC640847  
1447769\_x\_at 1.07185 adhesion molecule with Ig like domain 2 Amigo2  
1447770\_at 0.98974 calcium and integrin binding family member 2 Cib2  
1447771\_at 0.92860 --- ---  
1447772\_at 0.96266 "pleckstrin homology domain-containing, family A (phosphoinositide binding specific) member 3" Plekha3  
1447773\_x\_at 0.87812 RIKEN cDNA 6330409D20 gene 6330409D20Rik  
1447774\_x\_at 0.91980 RIKEN cDNA 5730469M10 gene 5730469M10Rik

1447775\_x\_at 1.06599 zinc finger protein 622 Zfp622  
1447776\_x\_at 1.09987 "RAB6, member RAS oncogene family" Rab6  
1447777\_x\_at 1.06652 --- ---  
1447778\_x\_at 0.88927 "BRCA1/BRCA2-containing complex, subunit 3" Brc3  
1447779\_x\_at 0.93056 HLA-B-associated transcript 1A Bat1a  
1447780\_x\_at 1.00989 "Tu translation elongation factor, mitochondrial /// similar to Tu translation elongation factor, mitochondrial" Tufm /// LOC669832  
1447781\_s\_at 1.10570 RNA (guanine-9-) methyltransferase domain containing 2 Rg9mtd2  
1447782\_x\_at 1.10615 transducin (beta)-like 3 Tbl3  
1447783\_x\_at 0.80753 "DNA segment, Chr 11, ERATO Doi 333, expressed" D11Ertd333e  
1447784\_x\_at 1.05609 RIKEN cDNA 9130023D20 gene 9130023D20Rik  
1447785\_x\_at 0.93029 "DNA segment, Chr 11, Wayne State University 99, expressed" D11Wsu99e  
1447786\_at 1.02165 "pleckstrin homology, Sec7 and coiled-coil domains 1" Pscd1  
1447787\_x\_at 0.96830 gap junction membrane channel protein alpha 7 Gja7  
1447788\_s\_at 0.90682 TSPY-like 3 Tspy13  
1447789\_x\_at 0.92958 --- ---  
1447790\_at 0.95646 --- ---  
1447791\_s\_at 0.93802 "guanine nucleotide binding protein, alpha 14" Gna14  
1447792\_x\_at 1.03971 G protein-coupled receptor 174 Gpr174  
1447793\_x\_at 0.98881 Ring-box 1 Rbx1  
1447794\_x\_at 1.04410 PLAC8-like 1 Plac8l1  
1447795\_at 0.96852 B-box and SPRY domain containing Bspry  
1447796\_at 0.93170 NOP17 Nop17  
1447797\_x\_at 0.90767 NOP17 Nop17  
1447798\_at 1.01997 RIKEN cDNA 1700123O21 gene 1700123O21Rik  
1447799\_x\_at 0.99843 RIKEN cDNA 1700001P01 gene 1700001P01Rik  
1447800\_x\_at 0.68229 Transcobalamin 2 Tcn2  
1447801\_x\_at 0.98989 --- ---  
1447802\_x\_at 1.03733 --- ---  
1447803\_x\_at 1.03482 "Capping protein (actin filament), gelsolin-like" Capg  
1447804\_x\_at 0.82916 CDNA sequence BC031781 BC031781  
1447805\_s\_at 1.03849 "DNA segment, Chr 11, ERATO Doi 730, expressed" D11Ertd730e  
1447806\_s\_at 1.07314 serine/arginine-rich protein specific kinase 3 Srp3  
1447807\_s\_at 1.15205 "pleckstrin homology domain containing, family H (with MyTH4 domain) member 1" Plekhh1  
1447808\_s\_at 0.96891 "solute carrier family 15 (H+/peptide transporter), member 2" Slc15a2  
1447809\_x\_at 0.90396 --- ---  
1447810\_x\_at 1.02114 "pleckstrin homology domain containing, family B (evectins) member 2" Plekhh2  
1447811\_s\_at 0.75705 adhesion molecule with Ig like domain 1 Amigo1  
1447812\_x\_at 1.02418 "filamin C, gamma (actin binding protein 280)" Flnc  
1447813\_x\_at 0.94287 src-like adaptor Sla  
1447814\_x\_at 1.11097 interleukin 16 Il16

|              |         |                                                                             |               |
|--------------|---------|-----------------------------------------------------------------------------|---------------|
| 1447815_x_at | 1.04948 | RIKEN cDNA 6430527G18 gene                                                  | 6430527G18Rik |
| 1447816_x_at | 0.90823 | oxidoreductase NAD-binding domain containing 1                              | Oxnad1        |
| 1447817_at   | 1.03909 | "hypoxia-inducible factor 1, alpha subunit inhibitor"                       | Hif1an        |
| 1447818_x_at | 0.98398 | Ras homolog enriched in brain like 1                                        | Rheb11        |
| 1447819_x_at | 1.05288 | "procollagen, type VIII, alpha 1"                                           | Col8a1        |
| 1447820_x_at | 1.02960 | carnitine palmitoyltransferase 2                                            | Cpt2          |
| 1447821_at   | 1.01423 | RIKEN cDNA 1700051K22 gene                                                  | 1700051K22Rik |
| 1447822_x_at | 1.07650 | RIKEN cDNA 2700038N03 gene                                                  | 2700038N03Rik |
| 1447823_x_at | 1.02275 | mitogen-activated protein kinase 12                                         | Mapk12        |
| 1447824_x_at | 0.92066 | heat shock 70kD protein 5 (glucose-regulated protein)                       | Hspa5         |
| 1447825_x_at | 0.96110 | protocadherin 8                                                             | Pcdh8         |
| 1447826_x_at | 1.00248 | RIKEN cDNA A930037G23 gene                                                  | A930037G23Rik |
| 1447827_x_at | 1.13279 | speckle-type POZ protein                                                    | Spop          |
| 1447828_x_at | 0.96278 | RIKEN cDNA 2310005P05 gene                                                  | 2310005P05Rik |
| 1447829_x_at | 0.94663 | "TAF9B RNA polymerase II, TATA box binding protein (TBP)-associated factor" | Taf9b         |
| 1447830_s_at | 0.95006 | regulator of G-protein signaling 2                                          | Rgs2          |
| 1447831_s_at | 1.03393 | myotubularin related protein 7                                              | Mtmr7         |
| 1447832_x_at | 1.13622 | Ankyrin repeat domain 10                                                    | Ankrd10       |
| 1447833_x_at | 1.05768 | microfibrillar-associated protein 2                                         | Mfap2         |
| 1447834_at   | 0.90591 | "Coatamer protein complex, subunit zeta 1"                                  | Copz1         |
| 1447835_at   | 0.97415 | RIKEN cDNA 2610528K11 gene                                                  | 2610528K11Rik |
| 1447836_x_at | 1.12978 | RIKEN cDNA 4921525O09 gene                                                  | 4921525O09Rik |
| 1447837_x_at | 0.93264 | ---                                                                         | ---           |
| 1447838_x_at | 0.82745 | echinoderm microtubule associated protein like 4                            | Eml4          |
| 1447839_x_at | 1.06466 | adrenomedullin                                                              | Adm           |
| 1447840_x_at | 1.01027 | E2F transcription factor 1                                                  | E2f1          |
| 1447841_x_at | 0.94478 | "ST3 beta-galactoside alpha-2,3-sialyltransferase 6"                        | St3gal6       |
| 1447842_x_at | 0.94293 | Transcobalamin 2                                                            | Tcn2          |
| 1447843_at   | 1.05332 | "proteasome (prosome, macropain) 26S subunit, non-ATPase, 13"               | Psmd13        |
| 1447844_at   | 1.03210 | Transcribed locus                                                           | ---           |
| 1447845_s_at | 1.17371 | vanin 1                                                                     | Vnn1          |
| 1447846_x_at | 1.13747 | leukocyte receptor cluster (LRC) member 4                                   | Leng4         |
| 1447847_x_at | 0.86544 | ---                                                                         | ---           |
| 1447848_at   | 0.98568 | epidermal growth factor receptor pathway substrate 15-like 1                | Eps15l1       |
| 1447849_s_at | 0.91489 | avian musculoaponeurotic fibrosarcoma (v-maf) AS42 oncogene homolog         | Maf           |
| 1447850_x_at | 0.92065 | "zinc finger, AN1-type domain 3"                                            | Zfand3        |
| 1447851_x_at | 0.85963 | ---                                                                         | ---           |
| 1447852_x_at | 0.95176 | RIKEN cDNA 2900002H16 gene                                                  | 2900002H16Rik |
| 1447853_x_at | 0.95619 | Kinesin family member 13A                                                   | Kif13a        |
| 1447854_s_at | 0.90110 | "histone 2, H2be"                                                           | Hist2h2be     |
| 1447855_x_at | 1.01450 | amyloid beta precursor protein (cytoplasmic tail) binding protein 2         | Appbp2        |

1447856\_x\_at 0.96497 "solute carrier family 25 (mitochondrial carrier, phosphate carrier), member 25" Slc25a25

1447857\_at 1.01694 --- ---

1447858\_x\_at 0.91553 "interleukin 4 receptor, alpha" Il4ra

1447859\_at 1.03011 aarF domain containing kinase 2 Adck2

1447860\_x\_at 0.90317 component of oligomeric golgi complex 8 Cog8

1447861\_x\_at 1.12800 Myeloid ecotropic viral integration site-related gene 1 Mrg1

1447862\_x\_at 1.12435 thrombospondin 2 Thbs2

1447863\_s\_at 0.97127 "nuclear receptor subfamily 4, group A, member 2" Nr4a2

1447864\_s\_at 0.91680 pogo transposable element with KRAB domain Pogk

1447865\_x\_at 1.03886 PDZ domain containing 11 Pdzd11

1447866\_x\_at 0.95005 RIKEN cDNA 2300009A05 gene 2300009A05Rik

1447867\_x\_at 0.99707 RIKEN cDNA 4930444A02 gene 4930444A02Rik

1447868\_x\_at 0.90568 thioredoxin-like 2 /// similar to thioredoxin-like 2 Txnl2 /// LOC620016

1447869\_x\_at 0.95142 Rho-related BTB domain containing 3 Rhobtb3

1447870\_x\_at 1.76541 RIKEN cDNA 1110002E22 gene 1110002E22Rik

1447871\_at 1.02439 Transcribed locus ---

1447872\_at 1.03711 Transcribed locus ---

1447873\_x\_at 1.07703 BH3 interacting domain death agonist Bid

1447874\_x\_at 0.86674 "sphingomyelin phosphodiesterase 1, acid lysosomal" Smpd1

1447875\_x\_at 1.05791 EST AA407452 AA407452

1447876\_x\_at 0.75978 RIKEN cDNA 2310073E15 gene 2310073E15Rik

1447877\_x\_at 1.00092 DNA methyltransferase (cytosine-5) 1 Dnmt1

1447878\_s\_at 0.84856 fibroblast growth factor receptor-like 1 Fgfr1

1447879\_x\_at 0.94123 DALR anticodon binding domain containing 3 /// WD repeat domain 6 Dalrd3 /// Wdr6

1447880\_x\_at 1.03147 "Endothelial differentiation, sphingolipid G-protein-coupled receptor, 5" Edg5

1447881\_x\_at 0.83054 --- ---

1447882\_x\_at 0.97287 DEAD (Asp-Glu-Ala-Asp) box polypeptide 54 Ddx54

1447883\_x\_at 0.80284 microtubule-associated protein 1 light chain 3 alpha Map1lc3a

1447884\_x\_at 1.07116 RIKEN cDNA 1300010M03 gene 1300010M03Rik

1447885\_x\_at 0.87076 "neural precursor cell expressed, developmentally down-regulated gene 9" Nedd9

1447886\_at 0.99973 RIKEN cDNA 0610040B09 gene 0610040B09Rik

1447887\_x\_at 1.04060 chondroitin sulfate proteoglycan 2 Cspg2

1447888\_x\_at 0.83133 mutS homolog 2 (E. coli) Msh2

1447889\_x\_at 1.09313 "gene model 50, (NCBI)" Gm50

1447890\_at 0.97807 reticulocalbin 1 Rcn1

1447891\_at 0.91631 "Transforming, acidic coiled-coil containing protein 2" Tacc2

1447892\_at 1.08574 --- ---

1447893\_x\_at 0.90614 "solute carrier family 39 (metal ion transporter), member 6" Slc39a6

1447894\_x\_at 0.95961 vacuolar protein sorting 52 (yeast) /// similar to vacuolar protein sorting 52

## Vps52 /// LOC631721

1447895\_x\_at 0.90437 PAN3 polyA specific ribonuclease subunit homolog (*S. cerevisiae*) Pan3  
 1447896\_s\_at 0.92662 RIKEN cDNA 2010109N14 gene 2010109N14Rik  
 1447897\_x\_at 0.90143 Anaphase promoting complex subunit 11 homolog (yeast) Anapc11  
 1447898\_s\_at 0.93371 "splicing factor, arginine/serine-rich 6" Sfrs6  
 1447899\_x\_at 0.90787 tumor-associated calcium signal transducer 1 Tacstd1  
 1447900\_x\_at 0.98528 ectonucleoside triphosphate diphosphohydrolase 4 Entpd4  
 1447901\_x\_at 0.78836 "Sfi1 homolog, spindle assembly associated (yeast) /// similar to spindle assembly associated Sfi1 homolog isoform b /// similar to Sfi1 homolog, spindle assembly associated (yeast)" Sfi1 /// LOC673420 /// LOC673566  
 1447902\_at 0.94457 RIKEN cDNA 1810013A23 gene 1810013A23Rik  
 1447903\_x\_at 0.96675 "adaptor-related protein complex 1, sigma 2 subunit" Ap1s2  
 1447904\_s\_at 0.94504 "farnesyltransferase, CAAX box, alpha" Fnta  
 1447905\_x\_at 0.97592 nucleoporin 62 Nup62  
 1447906\_at 0.89832 "Protein tyrosine phosphatase, receptor type, G" Ptpg  
 1447907\_x\_at 0.99648 "Amyloid beta (A4) precursor protein-binding, family A, member 1 binding protein" Apba2bp  
 1447908\_x\_at 0.99335 tetratricopeptide repeat domain 3 Ttc3  
 1447909\_s\_at 1.05647 selenoprotein K Selk  
 1447910\_x\_at 1.01030 selenoprotein K Selk  
 1447911\_at 1.15911 TEA domain family member 1 Tead1  
 1447912\_x\_at 0.91738 A kinase (PRKA) anchor protein (yotiao) 9 Akap9  
 1447913\_x\_at 1.12874 A kinase (PRKA) anchor protein (yotiao) 9 Akap9  
 1447914\_x\_at 1.07087 RIKEN cDNA 4833411O04 gene 4833411O04Rik  
 1447915\_x\_at 0.93363 cDNA sequence BC054438 BC054438  
 1447916\_at 1.02563 --- ---  
 1447917\_x\_at 0.98945 N-terminal Asn amidase Ntan1  
 1447918\_x\_at 0.96350 hypothetical protein LOC207685 /// similar to Ig lambda-3 chain C region - mouse LOC207685 /// LOC386520  
 1447919\_x\_at 1.02704 "NADH dehydrogenase (ubiquinone) 1, alpha/beta subcomplex, 1" Ndufab1  
 1447920\_at 0.98447 Ataxin 10 Atxn10  
 1447921\_at 0.96045 Transcribed locus ---  
 1447922\_at 0.95974 Syntaxin binding protein 5-like Stxbp5l  
 1447923\_at 0.88283 RIKEN cDNA 2810013C04 gene 2810013C04Rik  
 1447924\_at 1.03202 nuclear casein kinase and cyclin-dependent kinase substrate 1 Nucks1  
 1447925\_at 1.10011 RIKEN cDNA D630033A02 gene D630033A02Rik  
 1447926\_at 0.80957 ADP-ribosylation factor-like 5A Arl5a  
 1447927\_at 1.85134 macrophage activation 2 like /// similar to macrophage activation 2 like /// similar to macrophage activation 2 like Mpa2l /// LOC626578 /// LOC673101  
 1447928\_at 1.07653 "carbonic anhydrase 5b, mitochondrial" Car5b  
 1447929\_at 1.04147 slingshot homolog 3 (*Drosophila*) Ssh3  
 1447930\_at 1.36250 bromodomain adjacent to zinc finger domain 1A Baz1a  
 1447931\_at 1.08920 Wolf-Hirschhorn syndrome candidate 1-like 1 (human) Whsc11l

1447932\_at 1.02106 coiled-coil domain containing 16 Ccdc16  
1447933\_at 0.89763 kinesin family member 26A /// similar to CG14535-PA /// similar to CG14535-PA Kif26a /// LOC668303 /// LOC676226  
1447934\_at 1.21312 RIKEN cDNA 9630033F20 gene 9630033F20Rik  
1447935\_at 0.89798 "Fanconi anemia, complementation group M" Fancm  
1447936\_at 1.13535 RIKEN cDNA 2410006H16 gene 2410006H16Rik  
1447937\_a\_at 0.88992 RIKEN cDNA 4933409K07 gene /// similar to 4933409K07Rik protein /// similar to 4933409K07Rik protein /// hypothetical protein LOC622738 /// similar to similar to 4933409K07Rik protein /// hypothetical protein LOC665845 4933409K07Rik /// LOC545605 /// LOC545614 /// LOC622738 /// LOC665744 /// LOC665845  
1447938\_at 1.00872 similar to 4933409K07Rik protein LOC545614  
1447939\_a\_at 0.87475 RIKEN cDNA 4933409K07 gene /// similar to 4933409K07Rik protein /// hypothetical protein LOC665845 4933409K07Rik /// LOC545605 /// LOC665845  
1447940\_a\_at 1.16360 Braf transforming gene Braf  
1447941\_x\_at 1.00042 Braf transforming gene Braf  
1447942\_x\_at 1.19182 Neuraminidase 1 Neu1  
1447943\_x\_at 1.08344 YEATS domain containing 2 Yeats2  
1447944\_at 0.81944 zinc finger with KRAB and SCAN domains 1 Zkscan1  
1447945\_at 1.00436 avian musculoaponeurotic fibrosarcoma (v-maf) AS42 oncogene homolog Maf  
1447946\_at 1.06629 a disintegrin and metallopeptidase domain 23 Adam23  
1447947\_at 0.94211 "zinc finger, FYVE domain containing 16" Zfyve16  
1447948\_at 0.97480 RIKEN cDNA A430107O13 gene A430107O13Rik  
1447949\_at 1.09318 --- ---  
1447950\_at 1.06390 RIKEN cDNA A730011C13 gene A730011C13Rik  
1447951\_at 1.50347 RIKEN cDNA 5730403B10 gene 5730403B10Rik  
1447952\_at 0.98244 AU RNA binding protein/enoyl-coenzyme A hydratase Auh  
1447953\_at 0.84313 EGF-like domain 8 Egfl8  
1447954\_at 0.89757 leucine rich repeat containing 49 Lrrc49  
1447955\_at 1.07043 "similar to heterochromatin protein 1, binding protein 3" LOC670127  
1447956\_at 0.97271 expressed sequence C76614 C76614  
1447957\_at 1.15239 --- ---  
1447958\_at 0.99013 "16 days neonate thymus cDNA, RIKEN full-length enriched library, clone: A130082C12 product:unclassifiable, full insert sequence" ---  
1447959\_at 0.85393 zinc finger protein 398 Zfp398  
1447960\_at 1.07377 hypothetical protein 9630017O17 9630017O17  
1447961\_s\_at 1.13675 mitochondrial ribosomal protein L38 Mrpl38  
1447962\_at 1.00610 "PREDICTED: Mus musculus hypothetical protein LOC626765 (LOC626765), mRNA" ---  
1447963\_at 0.89421 --- ---  
1447964\_at 1.12306 tubulin tyrosine ligase Ttl  
1447965\_at 1.09730 expressed sequence C80012 C80012  
1447966\_a\_at 1.08978 transmembrane protein 69 Tmem69

1447967\_at 1.04022 transmembrane protein 69 Tmem69  
1447968\_at 0.93701 RIKEN cDNA 9330158F14 gene 9330158F14Rik  
1447969\_at 0.91615 minichromosome maintenance deficient domain containing 1 Mcmdc1  
1447970\_at 1.34983 --- ---  
1447971\_at 0.88219 RIKEN cDNA A230061C15 gene A230061C15Rik  
1447972\_at 1.00624 Transcribed locus ---  
1447973\_at 0.94613 thyroid hormone receptor interactor 11 Trip11  
1447974\_s\_at 0.98260 aquaporin 6 Aqp6  
1447975\_a\_at 0.98048 hypothetical protein LOC545261 LOC545261  
1447976\_at 0.97535 expressed sequence AI596198 AI596198  
1447977\_x\_at 0.96433 RIKEN cDNA 3100002L24 gene /// RIKEN cDNA 9230108I15 gene ///  
similar to gonadotropin inducible ovarian transcription factor 1 /// similar to zinc finger protein 709 ///  
similar to zinc finger protein 709 /// similar to zinc finger protein 709 /// similar to zinc finger protein  
709 /// similar to gonadotropin inducible ovarian transcription factor 1 /// similar to zinc finger protein  
97 /// similar to gonadotropin inducible ovarian transcription factor 1 3100002L24Rik ///  
9230108I15Rik /// LOC626832 /// LOC627914 /// LOC628147 /// LOC665043 /// LOC665078 ///  
LOC668030 /// LOC668039 /// LOC668066  
1447978\_at 0.96875 expressed sequence C80719 C80719  
1447979\_at 0.90414 RUN and TBC1 domain containing 2 Rutbc2  
1447980\_s\_at 0.79538 RUN and TBC1 domain containing 2 Rutbc2  
1447981\_at 0.97449 expressed sequence C78441 C78441  
1447982\_at 1.06719 RIKEN cDNA 1110008P14 gene 1110008P14Rik  
1447983\_at 1.02029 "Zinc finger, matrin-like" Zfml  
1447984\_at 1.19595 "DNA segment, Chr 1, ERATO Doi 75, expressed" D1Ertd75e  
1447985\_s\_at 1.03817 ankyrin repeat and IBR domain containing 1 Ankib1  
1447986\_at 0.97897 expressed sequence D17892 D17892  
1447987\_at 0.80373 RIKEN cDNA D030041N04 gene D030041N04Rik  
1447988\_at 0.99780 --- ---  
1447989\_at 1.09240 "Transcribed locus, weakly similar to XP\_576435.1 PREDICTED: similar to  
ORF4 [Rattus norvegicus]" ---  
1447990\_at 0.94657 expressed sequence C76332 C76332  
1447991\_at 1.04564 proprotein convertase subtilisin/kexin type 2 Pcsk2  
1447992\_s\_at 0.89784 proprotein convertase subtilisin/kexin type 2 Pcsk2  
1447993\_a\_at 0.95336 RIKEN cDNA 1700026B20 gene 1700026B20Rik  
1447994\_at 0.96828 RIKEN cDNA 1700026B20 gene 1700026B20Rik  
1447995\_x\_at 0.98167 RIKEN cDNA 1700026B20 gene 1700026B20Rik  
1447996\_at 1.18945 expressed sequence AI848149 AI848149  
1447997\_s\_at 1.11384 translocase of inner mitochondrial membrane 8 homolog a2 (yeast)  
Timm8a2  
1447998\_at 1.02835 expressed sequence AI324046 AI324046  
1447999\_x\_at 1.16279 similar to glyceraldehyde-3-phosphate dehydrogenase /// similar to  
glyceraldehyde-3-phosphate dehydrogenase /// cDNA sequence AK190093 /// similar to Glyceraldehyde-  
3-phosphate dehydrogenase (GAPDH) (38 kDa BFA-dependent ADP-ribosylation substrate) (BARS-

38) /// glyceraldehyde-3-phosphate dehydrogenase /// similar to Glyceraldehyde-3-phosphate dehydrogenase (GAPDH) /// hypothetical protein LOC671520 /// similar to Glyceraldehyde-3-phosphate dehydrogenase (GAPDH) /// similar to Glyceraldehyde-3-phosphate dehydrogenase (GAPDH) /// similar to Glyceraldehyde-3-phosphate dehydrogenase (GAPDH) LOC14433 /// LOC380687 /// AK190093 /// LOC384808 /// Gapdh /// LOC432919 /// LOC545984 /// LOC622339 /// LOC630967 /// LOC632720 /// LOC639817 /// LOC665036 /// LOC667048 /// LOC667806 /// LOC670367 /// LOC671520 /// LOC671913 /// LOC672238 /// LOC676700

|              |         |                                                  |               |
|--------------|---------|--------------------------------------------------|---------------|
| 1448000_at   | 0.94639 | cell division cycle associated 3                 | Cdca3         |
| 1448001_x_at | 0.91878 | cell division cycle associated 3                 | Cdca3         |
| 1448002_x_at | 1.03038 | RIKEN cDNA 2610001J05 gene                       | 2610001J05Rik |
| 1448003_at   | 0.93847 | ---                                              | ---           |
| 1448005_at   | 0.95569 | SAM and SH3 domain containing 1                  | Sash1         |
| 1448006_at   | 1.05581 | zinc finger CCCH type containing 7B              | Zc3h7b        |
| 1448007_at   | 0.85207 | "bromodomain adjacent to zinc finger domain, 2B" | Baz2b         |
| 1448008_at   | 0.98133 | ankyrin repeat and KH domain containing 1        | Ankhd1        |
| 1448009_at   | 1.09224 | UDP-glucose ceramide glucosyltransferase-like 1  | Ugcgl1        |
| 1448010_at   | 1.06197 | RIKEN cDNA A430104N18 gene                       | A430104N18Rik |
| 1448011_at   | 0.93967 | ---                                              | ---           |
| 1448012_at   | 1.08372 | expressed sequence C76336                        | C76336        |
| 1448013_at   | 1.00894 | ubiquitin specific peptidase 24                  | Usp24         |
| 1448014_s_at | 1.01956 | ubiquitin specific peptidase 24                  | Usp24         |
| 1448015_at   | 0.92989 | RIKEN cDNA 2310047C04 gene                       | 2310047C04Rik |
| 1448016_at   | 1.12487 | spindle assembly 6 homolog (C. elegans)          | Sass6         |
| 1448017_at   | 1.00961 | ubiquitin associated protein 2-like              | Ubp2l         |
| 1448018_at   | 1.39650 | ---                                              | ---           |
| 1448019_at   | 1.15435 | RIKEN cDNA 2900006A08 gene                       | 2900006A08Rik |
| 1448020_at   | 1.00421 | RAS-related protein-1a                           | Rap1a         |
| 1448021_at   | 0.62448 | Transcribed locus                                | ---           |
| 1448022_at   | 1.00016 | Transcribed locus                                | ---           |
| 1448023_at   | 1.02980 | "kalirin, RhoGEF kinase"                         | Kalrn         |
| 1448024_at   | 1.00952 | natriuretic peptide receptor 3                   | Npr3          |
| 1448025_at   | 0.92428 | similar to SIRP beta 1 isoform 2                 | LOC668101     |
| 1448026_at   | 0.97983 | ---                                              | ---           |
| 1448027_at   | 1.05438 | RIKEN cDNA 2010305B15 gene                       | 2010305B15Rik |
| 1448028_at   | 1.17089 | "TBC1 domain family, member 24"                  | Tbc1d24       |
| 1448029_at   | 1.03194 | T-box 3                                          | Tbx3          |
| 1448030_at   | 0.97294 | RIKEN cDNA 1700023D09 gene                       | 1700023D09Rik |



1448031\_at 0.77714 "Guanine nucleotide binding protein, alpha o" Gnao1  
1448032\_at 1.02547 5-azacytidine induced gene 2 Azi2  
1448033\_at 1.04556 TatD DNase domain containing 1 Tatdn1  
1448034\_at 0.75673 expressed sequence AI842396 AI842396  
1448037\_at 1.06226 "Zinc finger, CCHC domain containing 6" Zcchc6  
1448038\_at 1.00860 --- ---  
1448039\_at 0.89469 Similar to gonadotropin inducible ovarian transcription factor 2 LOC622175  
1448040\_at 0.95869 TCF3 (E2A) fusion partner Tfpt  
1448041\_at 0.81611 ring finger protein 2 Rnf2  
1448042\_s\_at 0.78554 ring finger protein 2 Rnf2  
1448043\_x\_at 0.85392 ring finger protein 2 Rnf2  
1448044\_a\_at 0.90064 "Adult male kidney cDNA, RIKEN full-length enriched library, clone:  
F530012N16 product:hypothetical protein, full insert sequence" ---  
1448045\_at 1.03856 "Adult male kidney cDNA, RIKEN full-length enriched library, clone:  
F530012N16 product:hypothetical protein, full insert sequence" ---  
1448046\_at 0.94107 Rab9 effector protein with kelch motifs Rabepk  
1448047\_at 0.99734 "Adult male medulla oblongata cDNA, RIKEN full-length enriched library,  
clone:6330524D21 product:unclassifiable, full insert sequence" ---  
1448048\_at 1.05203 cDNA sequence BC016495 BC016495  
1448049\_at 1.51526 jumonji domain containing 1C Jmjd1c  
1448050\_s\_at 1.09013 mitogen-activated protein kinase kinase kinase 4 Map4k4  
1448051\_at 1.14396 --- ---  
1448052\_at 0.86316 cingulin-like 1 /// similar to cingulin-like 1 isoform 1 Cgn1 /// LOC677485  
1448053\_at 0.89343 "UDP-Gal:betaGlcNAc beta 1,4-galactosyltransferase, polypeptide 3"  
B4galt3  
1448054\_at 1.00375 "Inhibitor of growth family, member 4" Ing4  
1448055\_at 0.96298 fibronectin type III domain containing 7 Fndc7  
1448056\_at 1.30100 "HECT, UBA and WWE domain containing 1" Huwe1  
1448057\_at 0.83164 --- ---  
1448058\_s\_at 1.25421 budding uninhibited by benzimidazoles 3 homolog (S. cerevisiae) Bub3  
1448059\_at 0.89658 mirror-image polydactyly gene 1 homolog (human) Mipol1  
1448060\_at 1.02885 "sema domain, transmembrane domain (TM), and cytoplasmic domain,  
(semaphorin) 6D" Sema6d  
1448061\_at 0.99484 macrophage scavenger receptor 1 Msr1  
1448062\_at 1.02750 serine/threonine kinase 11 Stk11  
1448063\_at 0.83693 IQ motif and Sec7 domain 2 Iqsec2  
1448064\_at 0.88856 RAN binding protein 9 Ranbp9  
1448065\_at 0.94124 protoporphyrinogen oxidase Ppox  
1448066\_at 0.94077 hypothetical LOC552909 LOC552909  
1448067\_at 0.95350 expressed sequence AW011956 AW011956  
1448068\_at 1.06134 sterol O-acyltransferase 1 Soat1  
1448069\_at 0.81690 transmembrane 4 superfamily member 1 Tm4sf1  
1448070\_at 0.99539 "exportin 1, CRM1 homolog (yeast)" Xpo1

1448071\_at 0.99062 --- ---  
1448072\_at 1.13130 RIKEN cDNA 2010010I01 gene 2010010I01Rik  
1448073\_at 0.95403 hypothetical LOC541456 LOC541456  
1448074\_at 1.07532 Relaxin 1 Rln1  
1448075\_at 1.01467 expressed sequence AA408251 AA408251  
1448076\_at 1.23756 SH2 domain binding protein 1 (tetratricopeptide repeat containing) Sh2bp1  
1448078\_at 0.97837 expressed sequence C76533 C76533  
1448079\_at 1.36570 ring finger protein 166 Rnf166  
1448080\_at 1.05730 E2F transcription factor 8 E2f8  
1448081\_at 1.13986 Collagen-like tail subunit (single strand of homotrimer) of asymmetric acetylcholinesterase Colq  
1448082\_at 0.94277 Chloride channel 1 Clcn1  
1448083\_at 0.85461 similar to voltage gated channel like 1 LOC675405  
1448085\_at 1.00143 "DNA segment, Chr 5, ERATO Doi 102, expressed" D5Ertd102e  
1448086\_at 0.96323 "DNA segment, Chr 1, ERATO Doi 164, expressed" D1Ertd164e  
1448088\_at 0.88563 expressed sequence C78228 C78228  
1448089\_at 1.06245 "DNA segment, Chr 4, ERATO Doi 58, expressed" D4Ertd58e  
1448090\_at 1.07106 Transcribed locus ---  
1448091\_at 0.93302 "DNA segment, Chr 15, ERATO Doi 50, expressed" D15Ertd50e  
1448092\_x\_at 0.94567 "serine (or cysteine) peptidase inhibitor, clade A, member 4, pseudogene 1" Serpina4-ps1  
1448093\_s\_at 1.11787 expressed sequence C77405 C77405  
1448094\_at 1.12440 hypothetical LOC546100 LOC546100  
1448095\_at 0.97388 Transcribed locus ---  
1448096\_at 1.46052 2-oxoglutarate and iron-dependent oxygenase domain containing 1 Ogfod1  
1448097\_at 1.04621 Ubiquitin protein ligase E3C Ube3c  
1448098\_at 0.97364 expressed sequence AA517545 AA517545  
1448099\_at 0.89654 "PREDICTED: Mus musculus hypothetical LOC432995 (LOC432995), mRNA" ---  
1448100\_at 0.94746 RIKEN cDNA 4833439L19 gene 4833439L19Rik  
1448101\_s\_at 0.95268 tripartite motif protein 27 Trim27  
1448102\_a\_at 1.01682 WD repeat domain 61 Wdr61  
1448103\_s\_at 0.98800 "non-POU-domain-containing, octamer binding protein" Nono  
1448104\_at 0.65969 "aldehyde dehydrogenase family 6, subfamily A1" Aldh6a1  
1448105\_at 0.99342 protamine 2 Prm2  
1448106\_at 1.05210 NECAP endocytosis associated 1 Necap1  
1448107\_x\_at 0.89492 kallikrein 1 Klk1  
1448108\_at 0.89260 serine incorporator 1 Serinc1  
1448109\_a\_at 1.09334 ribosomal protein L26 Rpl26  
1448110\_at 0.94009 "sema domain, immunoglobulin domain (Ig), transmembrane domain (TM) and short cytoplasmic domain, (semaphorin) 4A" Sema4a  
1448111\_at 0.85148 cytidine 5'-triphosphate synthase 2 Ctps2  
1448112\_at 0.95171 "cytochrome c oxidase, subunit VIIc" Cox7c

1448113\_at 0.88199 stathmin 1 /// similar to Stathmin (Phosphoprotein p19) (pp19) (Oncoprotein 18) (Op18) (Leukemia-associated phosphoprotein p18) (pp17) (Prosolin) (Metablastin) (Pr22 protein) (Leukemia-associated gene protein) Stmn1 /// LOC639458  
 1448114\_a\_at 1.05156 HpaII tiny fragments locus 9c Htf9c  
 1448115\_at 0.99960 HpaII tiny fragments locus 9c Htf9c  
 1448116\_at 0.98813 "ubiquitin-activating enzyme E1, Chr X" Ube1x  
 1448117\_at 0.84742 kit ligand Kitl  
 1448118\_a\_at 0.97416 cathepsin D Ctsd  
 1448119\_at 0.98967 "2,3-bisphosphoglycerate mutase" Bpgm  
 1448120\_at 0.86414 growth differentiation factor 9 Gdf9  
 1448121\_at 1.02860 WW domain binding protein 2 Wbp2  
 1448122\_at 1.05883 t-complex protein 1 Tcp1  
 1448123\_s\_at 0.97663 "transforming growth factor, beta induced" Tgfb1  
 1448124\_at 0.88986 "glucuronidase, beta" Gusb  
 1448125\_at 0.98716 Ras-like without CAAX 2 Rit2  
 1448126\_at 1.04539 "teratocarcinoma expressed, serine rich" Tera  
 1448127\_at 1.00513 ribonucleotide reductase M1 Rrm1  
 1448128\_at 0.92915 protective protein for beta-galactosidase Ppob  
 1448129\_at 0.94871 "actin related protein 2/3 complex, subunit 5" Arpc5  
 1448130\_at 1.35770 farnesyl diphosphate farnesyl transferase 1 Fdft1  
 1448131\_at 1.04426 mitofusin 2 Mfn2  
 1448132\_at 1.04083 "solute carrier family 19 (sodium/hydrogen exchanger), member 1" Slc19a1  
 1448133\_at 1.08609 NMD3 homolog (S. cerevisiae) Nmd3  
 1448134\_at 0.86947 cDNA sequence X99384 X99384  
 1448135\_at 0.96342 activating transcription factor 4 Atf4  
 1448136\_at 0.96710 ectonucleotide pyrophosphatase/phosphodiesterase 2 Enpp2  
 1448137\_at 0.96350 "aldehyde dehydrogenase family 7, member A1" Aldh7a1  
 1448138\_at 0.97881 "protein phosphatase 2A, regulatory subunit B (PR 53)" Ppp2r4  
 1448139\_at 0.93129 megalencephalic leukoencephalopathy with subcortical cysts 1 homolog (human) Mlc1  
 1448140\_at 1.03334 cytokine induced apoptosis inhibitor 1 Ciapin1  
 1448141\_at 0.99269 RIKEN cDNA 1110014J01 gene 1110014J01Rik  
 1448142\_x\_at 1.01786 ribosomal protein S13 /// similar to ribosomal protein S13 /// similar to ribosomal protein S13 /// similar to ribosomal protein S13 Rps13 /// LOC625298 /// LOC633920 /// LOC671723  
 1448143\_at 0.90233 "aldehyde dehydrogenase 2, mitochondrial" Aldh2  
 1448144\_at 0.97609 heterogeneous nuclear ribonucleoprotein A/B Hnrpab  
 1448145\_at 0.97843 WW domain containing E3 ubiquitin protein ligase 2 Wwp2  
 1448146\_at 0.88275 WW domain containing E3 ubiquitin protein ligase 2 Wwp2  
 1448147\_at 0.97704 "tumor necrosis factor receptor superfamily, member 19" Tnfrsf19  
 1448148\_at 0.92431 granulin Grn  
 1448149\_at 0.95136 "catenin (cadherin associated protein), alpha 1" Ctnna1  
 1448150\_at 0.99376 nucleoporin 62 Nup62

1448151\_at 0.98312 "ELAV (embryonic lethal, abnormal vision, Drosophila)-like 1 (Hu antigen R)" Elavl1  
 1448152\_at 0.93585 insulin-like growth factor 2 Igf2  
 1448153\_at 0.96144 "cytochrome c oxidase, subunit Va" Cox5a  
 1448154\_at 1.20303 N-myc downstream regulated gene 2 Ndr2  
 1448155\_at 0.90440 programmed cell death 6 interacting protein Pdcd6ip  
 1448156\_at 0.97585 trefoil factor 1 Tff1  
 1448157\_s\_at 1.02472 ribosomal protein 10 Rpl10  
 1448158\_at 0.82702 syndecan 1 Sdc1  
 1448159\_at 1.07114 "RAB7, member RAS oncogene family" Rab7  
 1448160\_at 0.86537 lymphocyte cytosolic protein 1 Lcp1  
 1448161\_a\_at 0.83346 chloride channel 4-2 Clcn4-2  
 1448162\_at 1.20572 vascular cell adhesion molecule 1 Vcam1  
 1448163\_at 1.04881 glucosamine-6-phosphate deaminase 1 /// similar to Glucosamine-6-phosphate isomerase (Glucosamine-6-phosphate deaminase) (GNPDA) (GlcN6P deaminase) (Oscillin) /// similar to Glucosamine-6-phosphate isomerase (Glucosamine-6-phosphate deaminase) (GNPDA) (GlcN6P deaminase) (Oscillin) Gnpda1 /// LOC231914 /// LOC667410  
 1448164\_at 0.92880 kelch domain containing 3 Klhdc3  
 1448165\_at 0.87170 caspase 2 Casp2  
 1448166\_a\_at 1.07367 "proteasome (prosome, macropain) subunit, beta type 1" Psmb1  
 1448167\_at 1.01170 interferon gamma receptor 1 Ifngr1  
 1448168\_a\_at 0.96610 salivary protein 1 Spt1  
 1448169\_at 1.05297 keratin 18 Krt18  
 1448170\_at 1.04869 seven in absentia 2 Siah2  
 1448171\_at 1.28782 seven in absentia 2 Siah2  
 1448172\_at 0.93915 "malate dehydrogenase 1, NAD (soluble)" Mdh1  
 1448173\_a\_at 0.85731 topoisomerase (DNA) III beta Top3b  
 1448174\_at 1.01044 cullin 1 Cull1  
 1448175\_at 1.07271 EH-domain containing 1 Ehd1  
 1448176\_a\_at 0.99321 heterogeneous nuclear ribonucleoprotein K Hnrpk  
 1448177\_at 0.96176 "transporter 1, ATP-binding cassette, sub-family B (MDR/TAP)" Tap1  
 1448178\_a\_at 1.04901 chaperonin subunit 3 (gamma) Cct3  
 1448179\_at 0.88456 upregulated during skeletal muscle growth 5 Usmg5  
 1448180\_a\_at 0.97827 hematological and neurological expressed sequence 1 Hn1  
 1448181\_at 0.93466 Kruppel-like factor 15 Klf15  
 1448182\_a\_at 0.92080 CD24a antigen Cd24a  
 1448183\_a\_at 1.04230 "hypoxia inducible factor 1, alpha subunit" Hif1a  
 1448184\_at 1.00453 FK506 binding protein 1a Fkbp1a  
 1448185\_at 1.03518 "homocysteine-inducible, endoplasmic reticulum stress-inducible, ubiquitin-like domain member 1" Herpud1  
 1448186\_at 1.04718 pancreatic lipase-related protein 2 Pnliprp2  
 1448187\_at 1.00663 "polymerase (DNA directed), delta 1, catalytic subunit" Pold1  
 1448188\_at 0.91342 "uncoupling protein 2 (mitochondrial, proton carrier)" Ucp2

1448189\_a\_at 0.97858 flightless I homolog (Drosophila) Fliih  
1448190\_at 1.15004 mitochondrial ribosomal protein L33 Mrpl33  
1448191\_at 1.05426 polo-like kinase 1 (Drosophila) Plk1  
1448192\_s\_at 1.02851 phosphoribosyl pyrophosphate synthetase 1 /// expressed sequence  
AU021838 Prps1 /// AU021838  
1448193\_at 1.02585 RIKEN cDNA 5730403B10 gene 5730403B10Rik  
1448194\_a\_at 0.99610 H19 fetal liver mRNA H19  
1448195\_at 1.09423 "TAF5-like RNA polymerase II, p300/CBP-associated factor (PCAF)-  
associated factor" Taf5l  
1448196\_at 0.98296 "methionine adenosyltransferase II, beta" Mat2b  
1448197\_at 1.01501 CEA-related cell adhesion molecule 11 Ceacam11  
1448198\_a\_at 0.95676 NADH dehydrogenase (ubiquinone) 1 beta subcomplex 8 Ndufb8  
1448199\_at 1.08427 ankyrin repeat domain 10 Ankrd10  
1448200\_at 0.66536 transcobalamin 2 Tcn2  
1448201\_at 1.19309 secreted frizzled-related protein 2 Sfrp2  
1448202\_x\_at 1.13080 RIKEN cDNA 2610524G07 gene 2610524G07Rik  
1448203\_at 0.96549 "ATP synthase, H+ transporting, mitochondrial F0 complex, subunit g" Atp5l  
1448204\_at 1.12708 salvador homolog 1 (Drosophila) Sav1  
1448205\_at 0.97585 "cyclin B1, related sequence 1 /// cyclin B1" Ccnb1-rs1 /// Ccnb1  
1448206\_at 1.08551 "proteasome (prosome, macropain) subunit, alpha type 2" Psma2  
1448207\_at 1.04083 LIM and SH3 protein 1 Lasp1  
1448208\_at 0.98203 MAD homolog 1 (Drosophila) Smad1  
1448209\_a\_at 0.82216 "solute carrier family 22 (organic cation transporter), member 17" Slc22a17  
1448210\_at 1.01321 "RAB1, member RAS oncogene family" Rab1  
1448211\_at 0.83594 "ATPase, H+ transporting, lysosomal V0 subunit E2" Atp6v0e2  
1448212\_at 1.07841 "tumor necrosis factor superfamily, member 5-induced protein 1" Tnfsf5ip1  
1448213\_at 0.98413 annexin A1 Anxa1  
1448214\_at 0.97910 pyruvate dehydrogenase (lipoamide) beta /// similar to pyruvate dehydrogenase  
(lipoamide) beta Pdhb /// LOC620009  
1448215\_a\_at 1.04032 dipeptidylpeptidase 3 Dpp3  
1448216\_at 0.87311 synaptogyrin 3 Syngr3  
1448217\_a\_at 1.06525 ribosomal protein L27 /// similar to ribosomal protein L27 /// similar to  
ribosomal protein L27 /// similar to ribosomal protein L27 /// similar to ribosomal protein L27 /// similar  
to ribosomal protein L27 Rpl27 /// LOC621100 /// LOC622236 /// LOC669376 /// LOC672370 ///  
LOC675088  
1448218\_s\_at 1.14330 "tyrosine 3-monooxygenase/tryptophan 5-monooxygenase activation protein,  
zeta polypeptide" Ywhaz  
1448219\_a\_at 1.00718 "tyrosine 3-monooxygenase/tryptophan 5-monooxygenase activation protein,  
zeta polypeptide" Ywhaz  
1448220\_at 1.01080 chymotrypsinogen B1 Ctrb1  
1448221\_at 0.96497 HLA-B-associated transcript 1A Bat1a  
1448222\_x\_at 0.94261 "cytochrome c oxidase, subunit VIIIa" Cox8a  
1448223\_at 0.88459 fatso Fto

1448224\_at 0.99922 "transcription factor A, mitochondrial" Tfam  
 1448225\_at 1.01591 GPI anchor attachment protein 1 Gpaa1  
 1448226\_at 0.89969 ribonucleotide reductase M2 Rrm2  
 1448227\_at 0.99018 growth factor receptor bound protein 7 Grb7  
 1448228\_at 0.96040 lysyl oxidase Lox  
 1448229\_s\_at 1.10302 cyclin D2 Ccnd2  
 1448230\_at 1.07934 ubiquitin specific peptidase 10 Usp10  
 1448231\_at 1.10412 FK506 binding protein 5 Fkbp5  
 1448232\_x\_at 1.00438 "tubulin, alpha 6 /// similar to Tubulin alpha-6 chain (Alpha-tubulin 6)"  
 Tuba6 /// LOC626534  
 1448233\_at 0.83895 prion protein Prnp  
 1448234\_at 0.97600 "DnaJ (Hsp40) homolog, subfamily B, member 6" Dnajb6  
 1448235\_s\_at 0.96160 high mobility group box 1 /// RIKEN cDNA 4932431P20 gene /// similar to  
 High mobility group protein 1 (HMG-1) (High mobility group protein B1) (Amphoterin) (Heparin-  
 binding protein p30) /// similar to High mobility group protein 1 (HMG-1) (High mobility group protein  
 B1) (Amphoterin) (Heparin-binding protein p30) /// similar to High mobility group protein 1 (HMG-1)  
 (High mobility group protein B1) (Amphoterin) (Heparin-binding protein p30) /// similar to High  
 mobility group protein 1 (HMG-1) (High mobility group protein B1) (Amphoterin) (Heparin-binding  
 protein p30) /// similar to High mobility group protein 1 (HMG-1) (High mobility group protein B1)  
 (Amphoterin) (Heparin-binding protein p30) /// similar to High mobility group protein 1 (HMG-1) (High  
 mobility group protein B1) (Amphoterin) (Heparin-binding protein p30) /// similar to High mobility  
 group protein 1 (HMG-1) (High mobility group protein B1) (Amphoterin) (Heparin-binding protein  
 p30) Hmgb1 /// 4932431P20Rik /// LOC432959 /// LOC434174 /// LOC545555 /// LOC637733 ///  
 LOC640060 /// LOC667777 /// LOC669546  
 1448236\_at 0.99239 radixin Rdx  
 1448237\_x\_at 0.86720 lactate dehydrogenase B Ldhb  
 1448238\_at 1.02415 RIKEN cDNA 2700060E02 gene 2700060E02Rik  
 1448239\_at 1.21822 heme oxygenase (decycling) 1 Hmox1  
 1448240\_at 0.89423 "membrane-bound transcription factor peptidase, site 1" Mbtps1  
 1448241\_at 1.10189 GM2 ganglioside activator protein Gm2a  
 1448242\_at 0.97025 Sec61 alpha 1 subunit (*S. cerevisiae*) Sec61a1  
 1448243\_at 1.02062 N-ethylmaleimide sensitive fusion protein attachment protein alpha Napa  
 1448244\_at 0.99964 lysophospholipase 1 Lypl1  
 1448245\_at 1.04484 ribosomal protein SA Rpsa  
 1448246\_at 0.97250 histone deacetylase 1 Hdac1  
 1448247\_at 0.92607 B-cell CLL/lymphoma 7B Bcl7b  
 1448248\_at 1.03288 v-crk sarcoma virus CT10 oncogene homolog (avian) Crk  
 1448249\_at 0.87851 glycerol-3-phosphate dehydrogenase 1 (soluble) Gpd1  
 1448250\_at 0.93429 RIKEN cDNA 9030425E11 gene 9030425E11Rik  
 1448251\_at 1.09184 RIKEN cDNA 9030425E11 gene 9030425E11Rik  
 1448252\_a\_at 1.07194 eukaryotic translation elongation factor 1 beta 2 Eef1b2  
 1448253\_at 1.06705 glutamate dehydrogenase 1 Glud1  
 1448254\_at 0.97909 pleiotrophin Ptn

1448255\_a\_at 0.98657 surfeit gene 4 Surf4  
1448256\_at 1.09245 golgi SNAP receptor complex member 1 Gosr1  
1448257\_at 1.03432 "solute carrier family 29 (nucleoside transporters), member 2" Slc29a2  
1448258\_a\_at 0.94760 signal peptidase complex subunit 1 homolog (S. cerevisiae) Spcs1  
1448259\_at 0.73988 follistatin-like 1 Fstl1  
1448260\_at 0.92374 ubiquitin carboxy-terminal hydrolase L1 Uchl1  
1448261\_at 0.88964 cadherin 1 Cdh1  
1448262\_at 1.03860 "proteasome (prosome, macropain) subunit, beta type 2" Psmb2  
1448263\_a\_at 1.05325 CNDP dipeptidase 2 (metallopeptidase M20 family) Cndp2  
1448264\_a\_at 1.07562 "eukaryotic translation initiation factor 3, subunit 2 (beta)" Eif3s2  
1448265\_x\_at 0.84189 epithelial V-like antigen 1 Eval  
1448266\_at 1.05253 endothelial differentiation-related factor 1 Edf1  
1448267\_at 0.85978 syntaxin 5A Stx5a  
1448268\_at 0.95958 transmembrane emp24 protein transport domain containing 9 Tmed9  
1448269\_a\_at 1.06632 kelch-like 13 (Drosophila) Klhl13  
1448270\_at 1.19708 DEAD (Asp-Glu-Ala-Asp) box polypeptide 21 Ddx21  
1448271\_a\_at 1.34975 DEAD (Asp-Glu-Ala-Asp) box polypeptide 21 Ddx21  
1448272\_at 0.71782 "B-cell translocation gene 2, anti-proliferative" Btg2  
1448273\_at 0.87073 glutathione synthetase Gss  
1448274\_at 1.12815 "complement component 1, q subcomponent binding protein" C1qbp  
1448275\_at 1.00273 transmembrane protein 19 Tmem19  
1448276\_at 1.01699 tetraspanin 4 Tspan4  
1448277\_at 1.03661 "polymerase (DNA directed), delta 2, regulatory subunit" Pold2  
1448278\_at 0.95380 XPA binding protein 2 Xab2  
1448279\_at 0.94638 "actin related protein 2/3 complex, subunit 3" Arpc3  
1448280\_at 0.98433 synaptophysin Syt  
1448281\_a\_at 0.96836 elastase 2A Ela2a  
1448282\_at 0.99455 "pleiotropic regulator 1, PRL1 homolog (Arabidopsis)" Plrg1  
1448283\_a\_at 0.99706 ubiquitin-like 1 (sentrin) activating enzyme E1B Uble1b  
1448284\_a\_at 0.87439 "NADH dehydrogenase (ubiquinone) 1, subcomplex unknown, 1" Ndufc1  
1448285\_at 0.96644 regulator of G-protein signaling 4 Rgs4  
1448286\_at 1.09051 hydroxyacyl-Coenzyme A dehydrogenase type II Hadh2  
1448287\_at 1.01474 RNA polymerase 1-3 Rpo1-3  
1448288\_at 1.02077 nuclear factor I/B Nfib  
1448289\_at 0.98252 collapsin response mediator protein 1 Crmp1  
1448290\_at 0.91034 pancreatitis-associated protein Pap  
1448291\_at 1.01590 matrix metalloproteinase 9 Mmp9  
1448292\_at 1.01571 ubiquinol-cytochrome c reductase (6.4kD) subunit Uqcrc  
1448293\_at 0.92368 --- ---  
1448294\_at 0.94119 LPS-induced TN factor /// hypothetical protein LOC545182 Litaf ///  
LOC545182  
1448295\_at 1.03771 "DNA segment, Chr 13, Wayne State University 50, expressed" D13Wsu50e  
1448296\_x\_at 0.96483 "tubulin, alpha 3 /// tubulin, alpha 7 /// similar to tubulin, alpha 1" Tuba3 ///

## Tuba7 /// LOC384954

1448297\_a\_at 0.94438 "tyrosine kinase, non-receptor, 2 /// similar to Activated CDC42 kinase 1 (ACK-1) (Non-receptor protein tyrosine kinase Ack) (Tyrosine kinase non-receptor protein 2)"

## Tnk2 /// LOC672286

1448298\_at 0.94216 "tyrosine kinase, non-receptor, 2" Tnk2

1448299\_at 0.87997 "solute carrier family 1 (neuronal/epithelial high affinity glutamate transporter, system Xag), member 1" Slc1a1

1448300\_at 0.80191 microsomal glutathione S-transferase 3 Mgst3

1448301\_s\_at 0.90521 "serine (or cysteine) peptidase inhibitor, clade B, member 1a" Serpinb1a

1448302\_at 1.00197 potassium channel tetramerisation domain containing 20 Kctd20

1448303\_at 0.98930 glycoprotein (transmembrane) nmb Gpnmb

1448304\_a\_at 1.07662 "RAB6, member RAS oncogene family" Rab6

1448305\_at 0.90866 "RAB6, member RAS oncogene family" Rab6

1448306\_at 1.49009 "nuclear factor of kappa light chain gene enhancer in B-cells inhibitor, alpha" Nfkbia

1448307\_at 1.10793 Down syndrome critical region homolog 2 (human) Dscr2

1448308\_at 1.01214 "adaptor-related protein complex 3, mu 1 subunit" Ap3m1

1448309\_at 0.99994 "adaptor-related protein complex 3, mu 1 subunit" Ap3m1

1448310\_at 1.04109 intestinal cell kinase Ick

1448311\_at 1.00759 ubiquitin specific peptidase 5 (isopeptidase T) Usp5

1448312\_at 0.91844 proprotein convertase subtilisin/kexin type 2 Pcsk2

1448313\_at 0.90808 tripeptidyl peptidase I Tpp1

1448314\_at 0.99162 cell division cycle 2 homolog A (S. pombe) Cdc2a

1448315\_a\_at 1.07310 "pyrroline-5-carboxylate reductase family, member 2" Pycr2

1448316\_at 0.97821 CKLF-like MARVEL transmembrane domain containing 3 Cmtm3

1448317\_at 0.98159 transmembrane protein 128 Tmem128

1448318\_at 1.00977 adipose differentiation related protein Adfp

1448319\_at 1.05901 "aldo-keto reductase family 1, member B3 (aldose reductase) /// similar to Aldose reductase (AR) (Aldehyde reductase)" Akr1b3 ///

LOC235852 /// LOC382486 /// LOC385448 /// LOC385495 /// LOC672268

1448320\_at 0.78004 stromal interaction molecule 1 Stim1

1448321\_at 1.02691 SPARC related modular calcium binding 1 Smoc1

1448322\_a\_at 0.94325 cytochrome c oxidase subunit IV isoform 1 Cox4i1

1448323\_a\_at 0.88279 biglycan Bgn

1448324\_at 1.10874 ribonucleic acid binding protein S1 Rnps1

1448325\_at 0.87062 myeloid differentiation primary response gene 116 Myd116

1448326\_a\_at 0.86448 cellular retinoic acid binding protein I Crabp1

1448327\_at 0.99791 actinin alpha 2 Actn2

1448328\_at 1.01413 SH3-domain binding protein 2 Sh3bp2

1448329\_at 0.98763 a disintegrin and metallopeptidase domain 3 (cyritestin) Adam3

1448330\_at 0.84155 "glutathione S-transferase, mu 1" Gstm1



1448331\_at 1.05061 "NADH dehydrogenase (ubiquinone) 1 beta subcomplex, 7" Ndufb7  
1448332\_at 1.05040 peroxisome biogenesis factor 19 Pex19  
1448333\_at 0.99566 ADP-ribosylarginine hydrolase Adprh  
1448334\_a\_at 0.87636 cyclin I Ccni  
1448335\_s\_at 0.87154 cyclin I Ccni  
1448336\_at 0.95683 developmentally regulated GTP binding protein 1 Drg1  
1448337\_at 0.93591 RIKEN cDNA 2410003P15 gene 2410003P15Rik  
1448338\_at 1.04688 plasma glutamate carboxypeptidase Pgcg  
1448339\_at 0.93020 transmembrane protein 30A Tmem30a  
1448340\_at 0.98001 transmembrane protein 30A Tmem30a  
1448341\_a\_at 0.97687 syntaxin binding protein 2 Stxbp2  
1448342\_at 1.02903 mitogen activated protein kinase 10 Mapk10  
1448343\_a\_at 0.92371 neighbor of Brca1 gene 1 Nbr1  
1448344\_at 1.07973 ribosomal protein S12 /// similar to ribosomal protein S12 /// similar to  
ribosomal protein S12 /// similar to ribosomal protein S12 /// similar to ribosomal protein S12 /// similar  
to ribosomal protein S12 /// similar to 40S ribosomal protein S12 /// similar to ribosomal protein S12 ///  
similar to ribosomal protein S12 /// similar to ribosomal protein S12 Rps12 /// LOC432865 ///  
LOC627835 /// LOC668354 /// LOC670751 /// LOC670832 /// LOC671641 /// LOC672008 ///  
LOC672415 /// LOC676277  
1448345\_at 0.97094 translocase of outer mitochondrial membrane 34 Tomm34  
1448346\_at 1.12841 "cofilin 1, non-muscle" Cfl1  
1448347\_a\_at 1.00592 GPI-anchored membrane protein 1 Gpiap1  
1448348\_at 1.02383 GPI-anchored membrane protein 1 Gpiap1  
1448349\_at 1.05705 "vesicle-associated membrane protein, associated protein A" Vapa  
1448350\_at 1.16735 argininosuccinate lyase Asl  
1448351\_at 1.02173 "coronin, actin binding protein 1B" Coro1b  
1448352\_at 0.90212 leucine zipper protein 1 Luzp1  
1448353\_x\_at 0.98208 ribophorin I Rpn1  
1448354\_at 1.07515 glucose-6-phosphate dehydrogenase X-linked G6pdx  
1448355\_at 0.87206 "protease, serine, 16 (thymus)" Prss16  
1448356\_at 0.88849 ubiquitin-conjugating enzyme E2D 2 Ube2d2  
1448357\_at 1.10148 small nuclear ribonucleoprotein polypeptide G /// similar to small nuclear  
ribonucleoprotein polypeptide G /// similar to small nuclear ribonucleoprotein polypeptide G Snrpg ///  
LOC666609 /// LOC671824  
1448358\_s\_at 1.03406 small nuclear ribonucleoprotein polypeptide G /// similar to small nuclear  
ribonucleoprotein polypeptide G /// similar to small nuclear ribonucleoprotein polypeptide G Snrpg ///  
LOC666609 /// LOC671824  
1448359\_a\_at 1.22872 "HIG1 domain family, member 1A" Higd1a  
1448360\_s\_at 0.94269 angel homolog 2 (Drosophila) Angel2  
1448361\_at 0.83441 tetratricopeptide repeat domain 3 Ttc3  
1448362\_at 1.08440 "DnaJ (Hsp40) homolog, subfamily C, member 7" Dnajc7  
1448363\_at 1.02548 yes-associated protein 1 Yap1  
1448364\_at 1.28380 cyclin G2 Ccng2

1448365\_at 1.12576 exosome component 7 Exosc7  
1448366\_at 0.88585 syntaxin 1A (brain) Stx1a  
1448367\_at 1.02566 stromal cell derived factor 4 Sdf4  
1448368\_at 0.96619 dynactin 6 Dctn6  
1448369\_at 0.98984 "polymerase (DNA directed), alpha 2" Pola2  
1448370\_at 0.83759 Unc-51 like kinase 1 (C. elegans) Ulk1  
1448371\_at 0.98582 "myosin light chain, phosphorylatable, fast skeletal muscle" Mylpf  
1448372\_a\_at 0.98928 transmembrane protein 4 Tmem4  
1448373\_at 1.07158 mitochondrial ribosomal protein L18 Mrpl18  
1448374\_at 0.96051 "mediator of RNA polymerase II transcription, subunit 28 homolog (yeast)"  
Med28  
1448375\_at 0.87943 transmembrane 9 superfamily member 3 Tm9sf3  
1448376\_at 1.05693 Werner helicase interacting protein 1 Wrnip1  
1448377\_at 0.94466 secretory leukocyte peptidase inhibitor Slpi  
1448378\_at 0.98054 "fascin homolog 1, actin bundling protein (Strongylocentrotus purpuratus)"  
Fscn1  
1448379\_at 1.03224 protection of telomeres 1 Pot1  
1448380\_at 1.17765 "lectin, galactoside-binding, soluble, 3 binding protein" Lgals3bp  
1448381\_at 0.98972 "G elongation factor, mitochondrial 1" Gfm1  
1448382\_at 0.93326 "enoyl-Coenzyme A, hydratase/3-hydroxyacyl Coenzyme A dehydrogenase"  
Ehhadh  
1448383\_at 0.73786 matrix metalloproteinase 14 (membrane-inserted) Mmp14  
1448384\_at 0.86005 protein O-fucosyltransferase 2 Pofut2  
1448385\_at 1.00407 "solute carrier family 15, member 4" Slc15a4  
1448386\_a\_at 0.92209 whey acidic protein Wap  
1448387\_at 1.08287 ring-box 1 Rbx1  
1448388\_a\_at 0.96532 RIKEN cDNA 1110002B05 gene 1110002B05Rik  
1448389\_at 1.02308 WD repeat domain 5 Wdr5  
1448390\_a\_at 0.64187 dehydrogenase/reductase (SDR family) member 3 Dhrs3  
1448391\_at 1.04344 "RAB9, member RAS oncogene family" Rab9  
1448392\_at 0.91311 secreted acidic cysteine rich glycoprotein Sparc  
1448393\_at 0.83193 claudin 7 Cldn7  
1448394\_at 0.99971 "myosin, light polypeptide 2, regulatory, cardiac, slow" Myl2  
1448395\_at 0.83874 secreted frizzled-related sequence protein 1 Sfrp1  
1448396\_at 0.99254 transmembrane protein 131 Tmem131  
1448397\_at 1.02985 gap junction membrane channel protein beta 6 Gjb6  
1448398\_s\_at 0.88037 ribosomal protein L22 Rpl22  
1448399\_at 1.02826 Tax1 (human T-cell leukemia virus type I) binding protein 1 Tax1bp1  
1448400\_a\_at 1.00656 "SWI/SNF related, matrix associated, actin dependent regulator of chromatin,  
subfamily d, member 2" Smarcd2  
1448401\_at 1.00494 "SWI/SNF related, matrix associated, actin dependent regulator of chromatin,  
subfamily d, member 2" Smarcd2  
1448402\_at 0.97385 talin 1 Tln1

1448403\_at 1.12020 leucyl-tRNA synthetase Lars  
1448404\_at 1.01155 secretory carrier membrane protein 2 Scamp2  
1448405\_a\_at 0.98712 CREBBP/EP300 inhibitory protein 1 Cri1  
1448406\_at 0.98267 CREBBP/EP300 inhibitory protein 1 Cri1  
1448407\_at 0.92472 RIKEN cDNA 4632428N05 gene 4632428N05Rik  
1448408\_at 0.87721 Hermansky-Pudlak syndrome 1 homolog (human) Hps1  
1448409\_at 1.09555 lymphoid-restricted membrane protein Lrmp  
1448410\_at 0.99800 "ubiquitination factor E4B, UFD2 homolog (S. cerevisiae)" Ube4b  
1448411\_at 0.94012 Wolfram syndrome 1 homolog (human) Wfs1  
1448412\_a\_at 0.92883 TSC22 domain family 4 Tsc22d4  
1448413\_at 1.00247 RIKEN cDNA 2410016O06 gene 2410016O06Rik  
1448414\_at 1.00263 RAD1 homolog (S. pombe) Rad1  
1448415\_a\_at 0.89583 "sema domain, immunoglobulin domain (Ig), short basic domain, secreted, (semaphorin) 3B" Sema3b  
1448416\_at 0.62074 matrix Gla protein Mgp  
1448417\_at 1.00209 ninjurin 1 Ninj1  
1448418\_s\_at 0.99525 WD repeat domain 23 Wdr23  
1448419\_at 0.97863 "processing of precursor 4, ribonuclease P/MRP family, (S. cerevisiae)" Pop4  
1448420\_a\_at 1.02790 F-box and leucine-rich repeat protein 12 Fbxl12  
1448421\_s\_at 0.89594 asporin Asp1  
1448422\_at 0.89248 transmembrane emp24 protein transport domain containing 4 Tmed4  
1448423\_at 0.96261 transmembrane emp24 protein transport domain containing 4 Tmed4  
1448424\_at 0.88842 frizzled-related protein Frzb  
1448425\_at 1.05753 "eukaryotic translation initiation factor 3, subunit 10 (theta)" Eif3s10  
1448426\_at 0.69052 sarcosine dehydrogenase Sardh  
1448427\_at 0.89029 "NADH dehydrogenase (ubiquinone) 1 alpha subcomplex, 6 (B14)" Ndufa6  
1448428\_at 0.76937 "neuroblastoma, suppression of tumorigenicity 1" Nbl1  
1448429\_at 1.02886 glycogenin Gyg  
1448430\_a\_at 1.10584 nascent polypeptide-associated complex alpha polypeptide /// similar to nascent polypeptide-associated complex alpha polypeptide /// similar to nascent polypeptide-associated complex alpha polypeptide /// similar to nascent polypeptide-associated complex alpha polypeptide Naca /// LOC628277 /// LOC633817 /// LOC669373  
1448431\_at 1.04655 ankyrin repeat and SOCS box-containing protein 6 Asb6  
1448432\_at 0.89482 "phospholipase C, delta 1" Plcd1  
1448433\_a\_at 0.96074 procollagen C-endopeptidase enhancer protein Pcolce  
1448434\_at 0.95069 ring finger protein 103 Rnf103  
1448435\_at 0.99176 "positive cofactor 2, multiprotein complex, glutamine/Q-rich-associated protein" Pcqap  
1448436\_a\_at 1.08115 interferon regulatory factor 1 Irf1  
1448437\_a\_at 0.99428 GTP binding protein 2 Gtpbp2  
1448438\_at 0.99620 "Der1-like domain family, member 2" Derl2  
1448439\_at 1.01957 "DNA segment, Chr 17, Wayne State University 104, expressed" D17Wsu104e  
1448440\_x\_at 1.02595 "DNA segment, Chr 17, Wayne State University 104, expressed"

## D17Wsu104e

1448441\_at 1.10819 CDC28 protein kinase 1b Cks1b  
 1448442\_a\_at 1.08853 "proteasome (prosome, macropain) subunit, alpha type 3" Psma3  
 1448443\_at 1.05674 "serine (or cysteine) peptidase inhibitor, clade I, member 1" Serpini1  
 1448444\_at 0.95776 --- ---  
 1448445\_at 0.97485 "acid phosphatase 6, lysophosphatidic" Acp6  
 1448446\_at 0.90284 deformed epidermal autoregulatory factor 1 (Drosophila) Deaf1  
 1448447\_at 1.04882 vacuolar protein sorting 28 (yeast) Vps28  
 1448448\_a\_at 0.99897 choline kinase beta Chkb  
 1448449\_at 1.06503 receptor-interacting serine-threonine kinase 3 Ripk3  
 1448450\_at 0.98026 adenylate kinase 2 Ak2  
 1448451\_at 1.11767 adenylate kinase 2 Ak2  
 1448452\_at 0.86522 interferon regulatory factor 8 Irf8  
 1448453\_at 0.91917 "hydroxy-delta-5-steroid dehydrogenase, 3 beta- and steroid delta-isomerase 1" Hsd3b1  
 1448454\_at 0.99949 "splicing factor, arginine/serine-rich 6" Sfrs6  
 1448455\_at 1.13371 "ceroid-lipofuscinosis, neuronal 8" Cln8  
 1448456\_at 1.12921 "ceroid-lipofuscinosis, neuronal 8" Cln8  
 1448457\_at 1.06638 keratin 71 Krt71  
 1448458\_at 1.00469 topoisomerase (DNA) II beta Top2b  
 1448459\_at 0.95960 Kv channel-interacting protein 1 Kcnip1  
 1448460\_at 0.77354 "activin A receptor, type 1" Acvr1  
 1448461\_a\_at 0.99947 THO complex 7 homolog (Drosophila) Thoc7  
 1448462\_at 1.10836 thymine DNA glycosylase /// similar to thymine DNA glycosylase isoform 2 /// similar to G/T mismatch-specific thymine DNA glycosylase (C-JUN leucine zipper interactive protein JZA-3) /// similar to thymine DNA glycosylase isoform 2 /// similar to G/T mismatch-specific thymine DNA glycosylase (C-JUN leucine zipper interactive protein JZA-3) Tdg /// LOC545124 /// LOC624784 /// LOC670176 /// LOC672659  
 1448463\_at 1.09700 RIKEN cDNA 4933434E20 gene 4933434E20Rik  
 1448464\_at 1.01476 YKT6 homolog (S. Cerevisiae) Ykt6  
 1448465\_at 0.80894 4-nitrophenylphosphatase domain and non-neuronal SNAP25-like protein homolog 1 (C. elegans) Nipsnap1  
 1448466\_at 0.96802 cell division cycle associated 5 Cdca5  
 1448467\_a\_at 1.09475 RIKEN cDNA G430002G23 gene G430002G23Rik  
 1448468\_a\_at 0.94983 "potassium voltage-gated channel, shaker-related subfamily, beta member 1" Kcnab1  
 1448469\_at 1.00321 nidogen 1 /// similar to Nidogen precursor (Entactin) Nid1 /// LOC630776  
 1448470\_at 0.99077 fructose biphosphatase 1 Fbp1  
 1448471\_a\_at 0.77372 cytotoxic T lymphocyte-associated protein 2 alpha Ctla2a  
 1448472\_at 1.17794 valyl-tRNA synthetase 2 Vars2  
 1448473\_at 0.87023 budding uninhibited by benzimidazoles 3 homolog (S. cerevisiae) Bub3  
 1448474\_at 1.03555 NIMA (never in mitosis gene a)-related expressed kinase 7 Nek7  
 1448475\_at 0.94211 olfactomedin-like 3 Olfml3

1448476\_at 1.03042 nucleosome assembly protein 1-like 4 Nap114  
1448477\_at 0.91594 carbohydrate sulfotransferase 12 Chst12  
1448478\_at 1.00589 Trf (TATA binding protein-related factor)-proximal protein homolog  
(Drosophila) Trfp  
1448479\_at 1.06472 "proteasome (prosome, macropain) 26S subunit, non-ATPase, 3" Psm3  
1448480\_at 1.21474 nuclear import 7 homolog (S. cerevisiae) Nip7  
1448481\_at 1.09650 neuraminidase 1 Neu1  
1448482\_at 0.71269 "solute carrier family 39 (metal ion transporter), member 8" Slc39a8  
1448483\_a\_at 0.96291 "NADH dehydrogenase (ubiquinone) 1 beta subcomplex, 2" Ndufb2  
1448484\_at 1.15135 S-adenosylmethionine decarboxylase 1 Amd1  
1448485\_at 0.83575 gamma-glutamyltransferase 1 Ggt1  
1448486\_at 0.96921 methylmalonyl-Coenzyme A mutase Mut  
1448487\_at 0.93668 leucine rich repeat (in FLII) interacting protein 1 Lrrfp1  
1448488\_at 1.00589 mitochondrial ribosomal protein S5 Mrps5  
1448489\_at 0.81478 platelet-activating factor acetylhydrolase 2 Pafah2  
1448490\_at 0.95675 aarF domain containing kinase 4 Adck4  
1448491\_at 0.84291 "enoyl coenzyme A hydratase 1, peroxisomal" Ech1  
1448492\_a\_at 1.12622 "proteasome (prosome, macropain) 26S subunit, non-ATPase, 12" Psm12  
1448493\_at 1.00082 polyadenylate-binding protein-interacting protein 2 Paip2  
1448494\_at 0.87627 growth arrest specific 1 Gas1  
1448495\_at 1.06092 tissue specific transplantation antigen P35B Tsta3  
1448496\_a\_at 1.03954 "inhibitor of growth family, member 1" Ing1  
1448497\_at 0.99542 "excision repair cross-complementing rodent repair deficiency,  
complementation group 3" Ercc3  
1448498\_at 1.12171 "ribosomal protein S6 kinase, polypeptide 4" Rps6ka4  
1448499\_a\_at 1.01143 "epoxide hydrolase 2, cytoplasmic" Ephx2  
1448500\_a\_at 0.95905 Lck interacting transmembrane adaptor 1 Lime1  
1448501\_at 1.09820 tetraspanin 6 Tspan6  
1448502\_at 0.92938 "solute carrier family 16 (monocarboxylic acid transporters), member 7" Slc16a7  
1448503\_at 0.94264 myeloid cell leukemia sequence 1 Mcl1  
1448504\_a\_at 0.95668 chromobox homolog 3 (Drosophila HP1 gamma) /// similar to chromobox  
homolog 3 /// similar to chromobox homolog 3 /// similar to chromobox homolog 3 Cbx3 ///  
LOC629578 /// LOC633016 /// LOC672750  
1448505\_at 1.07858 nuclear DNA binding protein C1d  
1448506\_at 0.91771 "serine (or cysteine) peptidase inhibitor, clade A, member 6" Serpina6  
1448507\_at 1.01378 EF hand domain containing 1 Efhd1  
1448508\_at 1.02014 Traf3 interacting protein 2 Traf3ip2  
1448509\_at 1.11766 RIKEN cDNA 3110001A13 gene 3110001A13Rik  
1448510\_at 0.92551 ephrin A1 Efna1  
1448511\_at 0.96811 "protein tyrosine phosphatase, receptor type, C polypeptide-associated protein"  
Ptprcap  
1448512\_at 0.79914 histone H1-like protein in spermatids 1 Hils1  
1448513\_a\_at 1.06402 Niemann Pick type C2 Npc2

1448514\_at 0.89036 "cytochrome c oxidase, subunit Vb" Cox5b  
1448515\_at 0.99225 translin Tsn  
1448516\_at 1.02177 translin Tsn  
1448517\_at 1.02520 translocase of inner mitochondrial membrane 22 homolog (yeast) Timm22  
1448518\_at 0.80636 translocase of inner mitochondrial membrane 22 homolog (yeast) Timm22  
1448519\_at 0.88850 TEA domain family member 2 Tead2  
1448520\_at 1.06082 "DNA cross-link repair 1B, PSO2 homolog (S. cerevisiae)" Dclre1b  
1448521\_at 1.01207 bromodomain containing 7 /// similar to bromodomain containing 7 Brd7 ///  
LOC634327  
1448522\_at 0.98883 seryl-aminoacyl-tRNA synthetase 2 Sars2  
1448523\_at 0.91222 nephronophthisis 1 (juvenile) homolog (human) Nphp1  
1448524\_s\_at 1.13822 "signal sequence receptor, delta" Ssr4  
1448525\_a\_at 1.15381 BCL2/adenovirus E1B interacting protein 3-like Bnip3l  
1448526\_at 1.10400 karyopherin (importin) beta 1 Kpnb1  
1448527\_at 1.00870 programmed cell death 10 Pdcd10  
1448528\_at 0.95117 programmed cell death 10 Pdcd10  
1448529\_at 0.69999 thrombomodulin Thbd  
1448530\_at 0.86620 guanosine monophosphate reductase Gmpr  
1448531\_at 0.91629 lamin B2 /// similar to Lamin-B2 Lmnb2 /// LOC671511  
1448532\_at 0.97981 prolactin-like protein C 2 Prlpc2  
1448533\_at 1.02435 cytoskeleton-associated protein 1 Ckap1  
1448534\_at 0.92386 signal-regulatory protein alpha Sirpa  
1448535\_at 0.95877 elongation protein 4 homolog (S. cerevisiae) Elp4  
1448536\_at 1.01847 "LSM3 homolog, U6 small nuclear RNA associated (S. cerevisiae)" Lsm3  
1448537\_at 1.05930 tetratricopeptide repeat domain 1 Ttc1  
1448538\_a\_at 1.11423 "DNA segment, Chr 4, Wayne State University 53, expressed" D4Wsu53e  
1448539\_a\_at 0.86543 aspartoacylase (aminoacylase) 3 Acy3  
1448540\_a\_at 0.98035 RIKEN cDNA 0610012G03 gene /// hypothetical protein LOC638521  
0610012G03Rik /// LOC638521  
1448541\_at 0.89067 kinesin 2 Kns2  
1448542\_at 1.14075 BRCA2 and CDKN1A interacting protein Bccip  
1448543\_at 0.94543 RIKEN cDNA 2310042G06 gene 2310042G06Rik  
1448544\_at 0.85989 carnitine acetyltransferase Crat  
1448545\_at 0.77727 syndecan 2 Sdc2  
1448546\_at 0.90201 Ras association (RalGDS/AF-6) domain family 3 Rassf3  
1448547\_at 0.87814 Ras association (RalGDS/AF-6) domain family 3 Rassf3  
1448548\_at 0.92478 tubby like protein 4 Tulp4  
1448549\_a\_at 1.03422 dolichyl-phosphate (UDP-N-acetylglucosamine)  
acetylglucosaminophosphotransferase 1 (GlcNAc-1-P transferase) Dpagt1  
1448550\_at 0.99686 lipopolysaccharide binding protein Lbp  
1448551\_a\_at 0.81064 tripartite motif protein 2 Trim2  
1448552\_s\_at 0.94476 RIKEN cDNA 2310028N02 gene 2310028N02Rik  
1448553\_at 1.06219 "similar to myosin, heavy polypeptide 4, skeletal muscle /// similar to myosin,

heavy polypeptide 7, cardiac muscle, beta" LOC671894 /// LOC674761  
1448554\_s\_at 1.02246 "myosin, heavy polypeptide 6, cardiac muscle, alpha /// similar to myosin,  
heavy polypeptide 4, skeletal muscle /// similar to myosin, heavy polypeptide 7, cardiac muscle, beta"  
Myh6 /// LOC671894 /// LOC674761  
1448555\_at 1.00863 "DNA segment, Chr 15, ERATO Doi 682, expressed" D15Ertd682e  
1448556\_at 0.84297 prolactin receptor Prlr  
1448557\_at 0.98611 RIKEN cDNA 1200015N20 gene 1200015N20Rik  
1448558\_a\_at 0.81855 "phospholipase A2, group IVA (cytosolic, calcium-dependent)" Pla2g4a  
1448559\_at 0.96761 flotillin 1 Flot1  
1448560\_at 1.21630 BH3 interacting domain death agonist Bid  
1448561\_at 0.92661 neutrophil cytosolic factor 2 Ncf2  
1448562\_at 1.18752 uridine phosphorylase 1 Upp1  
1448563\_at 0.93275 prohibitin Phb  
1448564\_at 1.08195 calcium and integrin binding 1 (calmyrin) Cib1  
1448565\_at 0.99883 "protein phosphatase 1, regulatory (inhibitor) subunit 11" Ppp1r11  
1448566\_at 0.66616 "solute carrier family 40 (iron-regulated transporter), member 1" Slc40a1  
1448567\_at 0.96157 transmembrane protein 115 Tmem115  
1448568\_a\_at 1.27784 "solute carrier family 20, member 1" Slc20a1  
1448569\_at 0.89725 "CD8 antigen, beta chain 1" Cd8b1  
1448570\_at 1.01001 "glia maturation factor, beta" Gmfb  
1448571\_a\_at 1.12529 "glia maturation factor, beta" Gmfb  
1448572\_at 0.87707 prolactin-like protein A Prlpa  
1448573\_a\_at 1.10835 CEA-related cell adhesion molecule 10 Ceacam10  
1448574\_at 1.10809 "expressed in non-metastatic cells 6, protein" Nme6  
1448575\_at 0.87707 interleukin 7 receptor Il7r  
1448576\_at 1.06400 interleukin 7 receptor Il7r  
1448577\_x\_at 1.07663 synaptogyrin 2 Syng2  
1448578\_at 0.91133 "platelet-activating factor acetylhydrolase, isoform 1b, beta1 subunit" Pafah1b1  
1448579\_at 0.91513 golgi apparatus protein 1 Glg1  
1448580\_at 0.95933 golgi apparatus protein 1 Glg1  
1448581\_at 0.99149 zinc finger protein 346 Zfp346  
1448582\_at 1.01748 "catenin, beta like 1" Ctnnb1  
1448583\_at 0.99451 expressed sequence AA960436 AA960436  
1448584\_at 0.88458 arginine/serine-rich coiled-coil 1 Rsrc1  
1448585\_at 1.02957 "general transcription factor II H, polypeptide 4" Gtf2h4  
1448586\_at 1.03860 heat shock protein 14 Hspa14  
1448587\_at 0.90520 "TBC1 domain family, member 10a" Tbc1d10a  
1448588\_at 0.91165 CD320 antigen Cd320  
1448589\_at 0.98942 "NADH dehydrogenase (ubiquinone) 1 beta subcomplex, 5" Ndufb5  
1448590\_at 1.06370 "procollagen, type VI, alpha 1" Col6a1  
1448591\_at 1.00533 cathepsin S Ctss  
1448592\_at 0.85980 cartilage associated protein Crtap  
1448593\_at 0.99193 WNT1 inducible signaling pathway protein 1 Wispl

1448594\_at 0.95658 WNT1 inducible signaling pathway protein 1 Wisp1  
1448595\_a\_at 1.01734 brain expressed gene 1 Bex1  
1448596\_at 0.93279 "solute carrier family 6 (neurotransmitter transporter, creatine), member 8"  
Slc6a8  
1448597\_at 1.04202 "cleavage stimulation factor, 3' pre-RNA, subunit 1" Cstf1  
1448598\_at 0.95440 matrix metalloproteinase 17 Mmp17  
1448599\_s\_at 1.03073 "DNA segment, Chr 4, Wayne State University 114, expressed" D4Wsu114e  
1448600\_s\_at 0.95666 vav 3 oncogene Vav3  
1448601\_s\_at 0.87005 "homeo box, msh-like 1" Msx1  
1448602\_at 0.96614 muscle glycogen phosphorylase Pygm  
1448603\_at 0.91895 serine/arginine-rich protein specific kinase 2 Srpk2  
1448604\_at 1.14844 uridine-cytidine kinase 2 Uck2  
1448605\_at 1.00755 "ras homolog gene family, member C" Rhoc  
1448606\_at 0.87558 "endothelial differentiation, lysophosphatidic acid G-protein-coupled receptor,  
2" Edg2  
1448607\_at 1.12957 --- ---  
1448608\_at 1.03847 decidual/trophoblast prolactin-related protein Dtprp  
1448609\_at 0.92176 "thiosulfate sulfurtransferase, mitochondrial" Tst  
1448610\_a\_at 0.97007 "superoxide dismutase 2, mitochondrial" Sod2  
1448611\_at 0.89762 "WW, C2 and coiled-coil domain containing 2" Wwc2  
1448612\_at 0.93909 stratifin Sfn  
1448613\_at 0.92011 extracellular matrix protein 1 Ecm1  
1448614\_at 0.85086 "5'-nucleotidase, cytosolic II" Nt5c2  
1448615\_at 1.00761 copper chaperone for superoxide dismutase Ccs  
1448616\_at 0.96585 "dishevelled 2, dsh homolog (Drosophila)" Dvl2  
1448617\_at 1.08529 CD53 antigen Cd53  
1448618\_at 1.23183 major vault protein Mvp  
1448619\_at 1.13700 7-dehydrocholesterol reductase Dhcr7  
1448620\_at 1.04921 "Fc receptor, IgG, low affinity III" Fcgr3  
1448621\_a\_at 0.79141 "sphingomyelin phosphodiesterase 1, acid lysosomal" Smpd1  
1448622\_at 1.09668 "LSM4 homolog, U6 small nuclear RNA associated (S. cerevisiae)" Lsm4  
1448623\_at 0.96742 transmembrane protein 123 Tmem123  
1448624\_at 1.07843 CD2 antigen (cytoplasmic tail) binding protein 2 Cd2bp2  
1448625\_at 0.92290 "golgi autoantigen, golgin subfamily a, 2" Golga2  
1448626\_at 1.01349 CDK5 regulatory subunit associated protein 1 Cdk5rap1  
1448627\_s\_at 0.96228 PDZ binding kinase Pbk  
1448628\_at 0.91434 secretogranin III Scg3  
1448629\_at 0.89600 Hermansky-Pudlak syndrome 4 homolog (human) Hps4  
1448630\_a\_at 0.93986 "succinate dehydrogenase complex, subunit C, integral membrane protein"  
Sdhc  
1448631\_a\_at 0.81786 homeodomain interacting protein kinase 2 Hipk2  
1448632\_at 1.40561 "proteasome (prosome, macropain) subunit, beta type 10" Psmb10  
1448633\_at 1.10239 PRP31 pre-mRNA processing factor 31 homolog (yeast) Prpf31



1448634\_at 0.97499 ralA binding protein 1 Ralbp1  
1448635\_at 1.02125 structural maintenance of chromosomes 2 Smc2  
1448636\_at 1.06535 myozenin 1 Myoz1  
1448637\_at 0.88236 "mediator of RNA polymerase II transcription, subunit 25 homolog (yeast)"  
Med25  
1448638\_at 1.03954 "Mdm2, transformed 3T3 cell double minute p53 binding protein" Mtbp  
1448639\_a\_at 0.95404 spermatogenesis associated 5 Spata5  
1448640\_at 0.98760 "solute carrier family 14 (urea transporter), member 1" Slc14a1  
1448641\_at 1.04500 mbt domain containing 1 Mbtd1  
1448642\_at 1.03594 poly(rC) binding protein 1 Pcbp1  
1448643\_at 0.98597 Sjogren's syndrome nuclear autoantigen 1 Ssna1  
1448644\_at 0.98031 penta-EF hand domain containing 1 Pef1  
1448645\_at 0.93344 male-specific lethal-3 homolog 1 (Drosophila) Msl31  
1448646\_at 1.24785 WD repeat domain 12 Wdr12  
1448647\_at 1.06104 "mannosidase 2, alpha 1" Man2a1  
1448648\_at 0.70654 RIKEN cDNA 9130005N14 gene 9130005N14Rik  
1448649\_at 0.56464 glutamyl aminopeptidase Enpep  
1448650\_a\_at 0.98904 "polymerase (DNA directed), epsilon" Pole  
1448651\_at 1.06931 nudix (nucleoside diphosphate linked moiety X)-type motif 5 Nudt5  
1448652\_at 1.05589 intraflagellar transport 88 homolog (Chlamydomonas) Ift88  
1448653\_at 1.15468 embryonic ectoderm development Eed  
1448654\_at 1.07139 mitochondrial carrier homolog 2 (C. elegans) Mtch2  
1448655\_at 0.78334 low density lipoprotein receptor-related protein 1 Lrp1  
1448656\_at 0.82449 "calcium channel, voltage-dependent, beta 3 subunit" Cacnb3  
1448657\_a\_at 1.00026 "DnaJ (Hsp40) homolog, subfamily B, member 10" Dnajb10  
1448658\_at 1.06490 squamous cell carcinoma antigen recognized by T-cells 1 Sart1  
1448659\_at 1.00346 caspase 7 Casp7  
1448660\_at 1.04470 Rho GDP dissociation inhibitor (GDI) gamma Arhgdig  
1448661\_at 0.90424 "phospholipase C, beta 3" Plcb3  
1448662\_at 0.79108 frizzled homolog 6 (Drosophila) Fzd6  
1448663\_s\_at 1.55021 mevalonate (diphospho) decarboxylase Mvd  
1448664\_a\_at 0.54146 SPEG complex locus Speg  
1448665\_at 0.96771 "dystrophin, muscular dystrophy" Dmd  
1448666\_s\_at 0.99548 "transducer of ERBB2, 2" Tob2  
1448667\_x\_at 0.99900 "transducer of ERBB2, 2" Tob2  
1448668\_a\_at 1.13526 interleukin-1 receptor-associated kinase 1 Irak1  
1448669\_at 0.97343 dickkopf homolog 3 (Xenopus laevis) Dkk3  
1448670\_at 0.93738 "ubiquitin-conjugating enzyme E2E 3, UBC4/5 homolog (yeast)" Ube2e3  
1448671\_at 0.80158 "ubiquitin-conjugating enzyme E2E 3, UBC4/5 homolog (yeast)" Ube2e3  
1448672\_a\_at 0.89829 zinc finger protein 289 Zfp289  
1448673\_at 0.80910 poliovirus receptor-related 3 Pvr13  
1448674\_at 0.95985 ring finger protein 25 Rnf25  
1448675\_at 0.89510 "DNA segment, Chr 1, ERATO Doi 161, expressed" D1Ert161e

|              |         |                                                                                                                                                         |                                    |
|--------------|---------|---------------------------------------------------------------------------------------------------------------------------------------------------------|------------------------------------|
| 1448676_at   | 0.69944 | "calcium/calmodulin-dependent protein kinase II, beta"                                                                                                  | Camk2b                             |
| 1448677_at   | 0.91271 | COX4 neighbor                                                                                                                                           | Cox4nb                             |
| 1448678_at   | 0.92155 | RIKEN cDNA 3110048E14 gene                                                                                                                              | 3110048E14Rik                      |
| 1448679_at   | 0.95148 | hyaluronoglucosaminidase 2                                                                                                                              | Hyal2                              |
| 1448680_at   | 0.89286 | "serine (or cysteine) peptidase inhibitor, clade A, member 1c"                                                                                          | Serpina1c                          |
| 1448681_at   | 0.87132 | "interleukin 15 receptor, alpha chain"                                                                                                                  | Il15ra                             |
| 1448682_at   | 0.94707 | dynein light chain LC8-type 1                                                                                                                           | Dynl11                             |
| 1448683_at   | 0.95336 | "cytochrome P450, family 2, subfamily d, polypeptide 26"                                                                                                | Cyp2d26                            |
| 1448684_at   | 1.00187 | "protein phosphatase 1, regulatory (inhibitor) subunit 2"                                                                                               | Ppp1r2                             |
| 1448685_at   | 1.06562 | RIKEN cDNA 2900010M23 gene                                                                                                                              | 2900010M23Rik                      |
| 1448686_at   | 0.95610 | interleukin 16                                                                                                                                          | Il16                               |
| 1448687_at   | 1.00591 | C1q domain containing 2                                                                                                                                 | C1qdc2                             |
| 1448688_at   | 1.04260 | podocalyxin-like                                                                                                                                        | Podxl                              |
| 1448689_at   | 0.89296 | related RAS viral (r-ras) oncogene homolog 2                                                                                                            | Rras2                              |
| 1448690_at   | 0.97211 | "potassium channel, subfamily K, member 1"                                                                                                              | Kcnk1                              |
| 1448691_at   | 1.06671 | ubiquilin 4                                                                                                                                             | Ubqln4                             |
| 1448692_at   | 1.05344 | ubiquilin 4                                                                                                                                             | Ubqln4                             |
| 1448693_at   | 0.94964 | cDNA sequence BC002216                                                                                                                                  | BC002216                           |
| 1448694_at   | 0.66826 | Jun oncogene                                                                                                                                            | Jun                                |
| 1448695_at   | 0.99340 | "protein kinase C, iota"                                                                                                                                | Prkci                              |
| 1448696_at   | 0.99633 | hephaestin                                                                                                                                              | Heph                               |
| 1448697_s_at | 1.13230 | ribosomal protein L36a-like                                                                                                                             | Rpl36al                            |
| 1448698_at   | 1.46478 | cyclin D1                                                                                                                                               | Ccnd1                              |
| 1448699_at   | 1.11046 | mitochondrial ribosomal protein L54                                                                                                                     | Mrpl54                             |
| 1448700_at   | 0.96911 | G0/G1 switch gene 2                                                                                                                                     | G0s2                               |
| 1448701_a_at | 1.07222 | "KRIT1, ankyrin repeat containing"                                                                                                                      | Krit1                              |
| 1448702_at   | 0.97541 | immediate early response 3 interacting protein 1                                                                                                        | Ier3ip1                            |
| 1448703_at   | 1.01165 | "LSM8 homolog, U6 small nuclear RNA associated (S. cerevisiae)"                                                                                         | Lsm8                               |
| 1448704_s_at | 0.97083 | histocompatibility 47                                                                                                                                   | H47                                |
| 1448705_at   | 0.90226 | zinc finger and BTB domain containing 22                                                                                                                | Zbtb22                             |
| 1448706_at   | 0.97770 | Traf and Tnf receptor associated protein                                                                                                                | Ttrap                              |
| 1448707_at   | 1.01398 | "TAF13 RNA polymerase II, TATA box binding protein (TBP)-associated factor"                                                                             | Taf13                              |
| 1448708_at   | 0.98852 | peroxisome proliferator activated receptor binding protein                                                                                              | Pparbp                             |
| 1448709_at   | 0.97296 | AT rich interactive domain 1A (Swi1 like) /// similar to AT rich interactive domain 1A isoform a /// similar to AT rich interactive domain 1A isoform a | Arid1a /// LOC669477 /// LOC675933 |
| 1448710_at   | 1.00386 | chemokine (C-X-C motif) receptor 4                                                                                                                      | Cxcr4                              |
| 1448711_at   | 1.02748 | minichromosome maintenance deficient 3 (S. cerevisiae) associated protein                                                                               | Mcm3ap                             |
| 1448712_at   | 0.98071 | choroideremia                                                                                                                                           | Chm                                |
| 1448713_at   | 1.15866 | signal transducer and activator of transcription 4                                                                                                      | Stat4                              |
| 1448714_at   | 0.97887 | RNA guanylyltransferase and 5'-phosphatase                                                                                                              | Rngtt                              |

1448715\_x\_at 1.15067 SH3-domain GRB2-like (endophilin) interacting protein 1 Sgip1  
1448716\_at 1.02006 "hemoglobin X, alpha-like embryonic chain in Hba complex" Hba-x  
1448717\_at 0.83089 glutaryl-Coenzyme A dehydrogenase Gcdh  
1448718\_at 1.03059 RIKEN cDNA 2400001E08 gene 2400001E08Rik  
1448719\_at 0.89704 "transcriptional adaptor 3 (NGG1 homolog, yeast)-like" Tada3l  
1448720\_at 1.00301 leucine rich repeat containing 40 Lrrc40  
1448721\_at 0.90719 "DNA segment, Chr 1, ERATO Doi 622, expressed" D1Ertd622e  
1448722\_s\_at 1.00186 phosphopantothenoylcysteine synthetase Ppcs  
1448723\_at 0.97948 retinol dehydrogenase 7 Rdh7  
1448724\_at 0.86006 cytokine inducible SH2-containing protein Cish  
1448725\_at 0.94919 poly (ADP-ribose) glycohydrolase Parg  
1448726\_at 0.94257 "small nuclear RNA activating complex, polypeptide 2" Snapc2  
1448727\_at 0.89488 "transducin-like enhancer of split 6, homolog of Drosophila E(spl)" Tle6  
1448728\_a\_at 1.22680 "nuclear factor of kappa light polypeptide gene enhancer in B-cells inhibitor, zeta" Nfkbiz  
1448729\_a\_at 1.06629 septin 4 4-Sep  
1448730\_at 1.07285 "carboxypeptidase A3, mast cell" Cpa3  
1448731\_at 1.02750 "interleukin 10 receptor, alpha" Il10ra  
1448732\_at 0.94700 cathepsin B Ctsb  
1448733\_at 0.83121 B lymphoma Mo-MLV insertion region 1 Bmi1  
1448734\_at 1.04203 ceruloplasmin Cp  
1448735\_at 0.84127 ceruloplasmin Cp  
1448736\_a\_at 1.10267 hypoxanthine guanine phosphoribosyl transferase 1 Hprt1  
1448737\_at 0.65006 tetraspanin 7 Tspan7  
1448738\_at 0.93119 calbindin-28K Calb1  
1448739\_x\_at 1.03419 ribosomal protein S18 Rps18  
1448740\_at 1.10216 RIKEN cDNA 2400006H24 gene 2400006H24Rik  
1448741\_at 0.87532 "solute carrier family 3, member 1" Slc3a1  
1448742\_at 0.90049 snail homolog 1 (Drosophila) Snai1  
1448743\_at 0.83721 "synovial sarcoma, X breakpoint 2 interacting protein" Ssx2ip  
1448744\_at 0.95649 galactosamine (N-acetyl)-6-sulfate sulfatase Galns  
1448745\_s\_at 0.91430 lorcin Lor  
1448746\_at 0.97897 nibrin Nbn  
1448747\_at 0.79567 F-box only protein 32 Fbxo32  
1448748\_at 0.99714 pleckstrin Plek  
1448749\_at 1.01075 pleckstrin Plek  
1448750\_at 0.92660 heart and neural crest derivatives expressed transcript 1 Hand1  
1448751\_at 0.76842 "adaptor-related protein complex 3, mu 2 subunit" Ap3m2  
1448752\_at 0.64838 carbonic anhydrase 2 Car2  
1448753\_at 1.09113 signal recognition particle 9 Srp9  
1448754\_at 0.98470 "retinol binding protein 1, cellular" Rbp1  
1448755\_at 0.80651 "procollagen, type XV" Col15a1  
1448756\_at 1.03421 S100 calcium binding protein A9 (calgranulin B) S100a9

1448757\_at 0.91888 promyelocytic leukemia Pml  
 1448758\_at 0.86015 similar to nuclear receptor binding factor 2 /// similar to nuclear receptor binding factor 2 /// nuclear receptor binding factor 2 LOC627232 /// LOC627424 /// Nr1h2  
 1448759\_at 0.86640 "interleukin 2 receptor, beta chain" Il2rb  
 1448760\_at 0.81464 zinc finger protein 68 Zfp68  
 1448761\_a\_at 0.91714 "coatamer protein complex, subunit gamma 2" Copg2  
 1448762\_at 0.95591 RAD17 homolog (S. pombe) Rad17  
 1448763\_at 0.91518 "ATPase family, AAA domain containing 1" Atad1  
 1448764\_a\_at 1.11358 "fatty acid binding protein 1, liver" Fabp1  
 1448765\_at 0.82284 Fyn proto-oncogene Fyn  
 1448766\_at 0.95086 gap junction membrane channel protein beta 1 Gjb1  
 1448767\_s\_at 0.96598 gap junction membrane channel protein beta 1 Gjb1  
 1448768\_at 0.91955 myelin oligodendrocyte glycoprotein Mog  
 1448769\_at 1.03164 "solute carrier family 35, member B1" Slc35b1  
 1448770\_a\_at 0.90757 ATPase inhibitory factor 1 Atpif1  
 1448771\_a\_at 1.02773 ferritin heavy chain 1 Fth1  
 1448772\_at 0.99310 "ubiquitin-conjugating enzyme E2A, RAD6 homolog (S. cerevisiae)" Ube2a  
 1448773\_at 1.17850 ribosomal protein L11 /// similar to 60S ribosomal protein L11 /// similar to 60S ribosomal protein L11 /// hypothetical gene supported by AK011800; BC025077; NM\_025919 /// similar to 60S ribosomal protein L11 Rpl11 /// LOC194197 /// LOC235424 /// LOC328825 /// LOC665330  
 1448774\_at 1.14880 stomatin (Epb7.2)-like 2 Stoml2  
 1448775\_at 1.36161 interferon activated gene 203 Ifi203  
 1448776\_at 1.03850 "growth arrest and DNA-damage-inducible, gamma interacting protein 1" Gadd45gip1  
 1448777\_at 0.97096 minichromosome maintenance deficient 2 mitotin (S. cerevisiae) Mcm2  
 1448778\_at 0.95290 "splicing factor, arginine/serine-rich 4 (SRp75)" Sfrs4  
 1448779\_at 1.09168 CDKN1A interacting zinc finger protein 1 Ciz1  
 1448780\_at 1.13937 "solute carrier family 12, member 2" Slc12a2  
 1448781\_at 1.06752 Ngfi-A binding protein 1 Nab1  
 1448782\_at 1.00415 thioredoxin domain containing 11 Txndc11  
 1448783\_at 0.97602 "solute carrier family 7 (cationic amino acid transporter, y+ system), member 9" Slc7a9  
 1448784\_at 1.01607 "TAF10 RNA polymerase II, TATA box binding protein (TBP)-associated factor" Taf10  
 1448785\_at 1.01235 "runt-related transcription factor 1; translocated to, 1 (cyclin D-related)" Runx1t1  
 1448786\_at 1.01143 RIKEN cDNA 1100001H23 gene 1100001H23Rik  
 1448787\_at 0.94295 modulator of apoptosis 1 Moap1  
 1448788\_at 1.08971 Cd200 antigen Cd200  
 1448789\_at 0.89178 "aldehyde dehydrogenase family 1, subfamily A3" Aldh1a3  
 1448790\_at 0.88668 "sema domain, transmembrane domain (TM), and cytoplasmic domain, (semaphorin) 6B" Sema6b

1448791\_at 1.01124 sorting nexin 5 Snx5  
1448792\_a\_at 0.95788 "cytochrome P450, family 2, subfamily f, polypeptide 2" Cyp2f2  
1448793\_a\_at 1.17304 syndecan 4 Sdc4  
1448794\_s\_at 1.02773 "DnaJ (Hsp40) homolog, subfamily C, member 2" Dnajc2  
1448795\_a\_at 1.05685 transforming growth factor beta regulated gene 4 Tbrg4  
1448796\_s\_at 1.07062 transforming growth factor beta regulated gene 4 Tbrg4  
1448797\_at 1.08781 "ELK3, member of ETS oncogene family" Elk3  
1448798\_at 0.90310 ESP8-like 3 Eps8l3  
1448799\_s\_at 1.01514 mitochondrial ribosomal protein S12 Mrps12  
1448800\_at 0.93163 reticulon 4 interacting protein 1 Rtn4ip1  
1448801\_a\_at 0.92202 translocase of inner mitochondrial membrane 44 Timm44  
1448802\_at 1.12862 nuclear fragile X mental retardation protein interacting protein 1 Nufip1  
1448803\_at 1.04493 "golgi autoantigen, golgin subfamily a, 4" Golga4  
1448804\_at 0.91127 "cytochrome P450, family 11, subfamily a, polypeptide 1" Cyp11a1  
1448805\_at 0.99633 upstream transcription factor 1 Usf1  
1448806\_at 0.96707 matrix metalloproteinase 24 Mmp24  
1448807\_at 0.98875 histamine receptor H 3 Hrh3  
1448808\_a\_at 1.08585 "expressed in non-metastatic cells 2, protein" Nme2  
1448809\_at 1.05206 chromosome segregation 1-like (S. cerevisiae) Cse11  
1448810\_at 1.00469 glucosamine Gne  
1448811\_at 1.06640 mitochondrial ribosomal protein L2 Mrpl2  
1448812\_at 1.00314 hippocalcin-like 1 Hpcal1  
1448813\_at 0.97090 arylacetamide deacetylase (esterase) Aadac  
1448814\_at 0.83534 growth factor receptor bound protein 2-associated protein 1 Gab1  
1448815\_at 0.95140 8-oxoguanine DNA-glycosylase 1 Ogg1  
1448816\_at 1.08330 prostaglandin I2 (prostacyclin) synthase Ptgis  
1448817\_at 0.95279 "OTU domain, ubiquitin aldehyde binding 1" Otub1  
1448818\_at 1.01367 wingless-related MMTV integration site 5A Wnt5a  
1448819\_at 1.00404 "eukaryotic translation initiation factor 2, subunit 2 (beta)" Eif2s2  
1448820\_a\_at 1.10442 "eukaryotic translation initiation factor 2, subunit 2 (beta)" Eif2s2  
1448821\_at 0.90604 tyrosinase Tyr  
1448822\_at 1.13053 "proteasome (prosome, macropain) subunit, beta type 6" Psmb6  
1448823\_at 0.62411 chemokine (C-X-C motif) ligand 12 Cxcl12  
1448824\_at 0.94156 "ubiquitin-conjugating enzyme E2, J1" Ube2j1  
1448825\_at 0.62847 "pyruvate dehydrogenase kinase, isoenzyme 2" Pdk2  
1448826\_at 0.92778 "myosin, heavy polypeptide 6, cardiac muscle, alpha" Myh6  
1448827\_s\_at 1.03216 "myosin, heavy polypeptide 6, cardiac muscle, alpha /// myosin, heavy polypeptide 7, cardiac muscle, beta /// similar to myosin, heavy polypeptide 7, cardiac muscle, beta" Myh6 /// Myh7 /// LOC674761  
1448828\_at 1.03803 structural maintenance of chromosomes 6 Smc6  
1448829\_at 1.01612 structural maintenance of chromosomes 6 Smc6  
1448830\_at 0.83382 dual specificity phosphatase 1 Dusp1  
1448831\_at 1.15528 angiopoietin 2 Angpt2

1448832\_at 0.95919 complexin 1 Cplx1  
1448833\_at 1.01397 forkhead box M1 Foxm1  
1448834\_at 1.04647 forkhead box M1 Foxm1  
1448835\_at 1.12083 E2F transcription factor 6 E2f6  
1448836\_s\_at 1.12846 "ATP binding domain 1 family, member B" Atpbd1b  
1448837\_at 0.92941 villin 1 Vill  
1448838\_at 0.92797 "topoisomerase I binding, arginine/serine-rich" Topors  
1448839\_at 0.99749 ankyrin repeat domain 47 Ankrd47  
1448840\_at 0.95888 transmembrane and ubiquitin-like domain containing 1 Tmub1  
1448841\_at 0.99352 pore forming protein-like Pfpl  
1448842\_at 1.01040 "cysteine dioxygenase 1, cytosolic" Cdo1  
1448843\_at 1.19158 "similar to signal sequence receptor, alpha" LOC636537  
1448844\_at 1.15027 cytochrome b5 type B Cyb5b  
1448845\_at 1.10236 ribonuclease P 25 subunit (human) Rpp25  
1448846\_a\_at 1.16879 ribosomal protein L29 /// similar to 60S ribosomal protein L29 (P23) /// similar to 60S ribosomal protein L29 /// similar to 60S ribosomal protein L29 Rpl29 /// LOC433350 /// LOC433706 /// LOC433941 /// LOC622707 /// LOC626772 /// LOC665032 /// LOC666642 /// LOC667466 /// LOC669999 /// LOC670211 /// LOC670334 /// LOC675846  
1448847\_at 0.95178 serine incorporator 3 Serinc3  
1448848\_at 1.01142 "torsin family 1, member B" Tor1b  
1448849\_at 1.04120 mitochondrial ribosomal protein L40 Mrpl40  
1448850\_a\_at 1.13465 "DnaJ (Hsp40) homolog, subfamily C, member 5" Dnajc5  
1448851\_a\_at 1.10297 "DnaJ (Hsp40) homolog, subfamily C, member 5" Dnajc5  
1448852\_at 0.96889 regucalcin Rgn  
1448853\_at 1.06530 synaptojanin 2 binding protein Synj2bp  
1448854\_s\_at 0.97786 "murinoglobulin, pseudogene 1 /// murinoglobulin 1 /// murinoglobulin 2 /// similar to murinoglobulin 1 /// similar to murinoglobulin 1" Mug-ps1 /// Mug1 /// Mug2 /// LOC434083 /// LOC669343  
1448855\_at 1.12297 Ras association (RalGDS/AF-6) domain family 1 Rassf1  
1448856\_a\_at 0.87543 methionine sulfoxide reductase A Msra  
1448857\_a\_at 0.98943 "zinc finger, DHHC domain containing 12" Zdhhc12  
1448858\_at 0.82440 Unc-51 like kinase 2 (C. elegans) Ulk2  
1448859\_at 0.98122 chemokine (C-X-C motif) ligand 13 Cxcl13  
1448860\_at 0.66352 rad and gem related GTP binding protein 2 Rem2  
1448861\_at 0.98149 Tnf receptor-associated factor 5 /// similar to TNF receptor-associated factor 5 Traf5 /// LOC622602  
1448862\_at 1.05690 intercellular adhesion molecule 2 Icam2  
1448863\_a\_at 1.08774 "tumor necrosis factor, alpha-induced protein 1 (endothelial)" Tnfaip1  
1448864\_at 0.96741 SNF related kinase Snrk

|              |                                                                           |             |
|--------------|---------------------------------------------------------------------------|-------------|
| 1448865_at   | 1.47380 hydroxysteroid (17-beta) dehydrogenase 7                          | Hsd17b7     |
| 1448866_at   | 1.05938 SUMO/sentrin specific peptidase 3                                 | Senp3       |
| 1448867_at   | 0.92293 "TMEM9 domain family, member B"                                   | Tmem9b      |
| 1448868_at   | 1.02793 SCAN domain-containing 1                                          | Scand1      |
| 1448869_a_at | 1.00314 mitochondrial ribosomal protein S16                               | Mrps16      |
| 1448870_at   | 0.84621 latent transforming growth factor beta binding protein 1          | Ltbp1       |
| 1448871_at   | 1.00337 mitogen activated protein kinase 13                               | Mapk13      |
| 1448872_at   | 1.00387 regenerating islet-derived 3 gamma                                | Reg3g       |
| 1448873_at   | 0.89068 occludin                                                          | Ocln        |
| 1448874_a_at | 0.98843 SH2B adaptor protein 1                                            | Sh2b1       |
| 1448875_at   | 0.89346 zinc fingers and homeoboxes protein 1                             | Zhx1        |
| 1448876_at   | 0.96159 Ellis van Creveld gene homolog (human)                            | Evc         |
| 1448877_at   | 1.05183 distal-less homeobox 2                                            | Dlx2        |
| 1448878_at   | 0.89948 Max dimerization protein 3                                        | Mxd3        |
| 1448879_at   | 1.14779 ubiquitin-conjugating enzyme E2L 3                                | Ube2l3      |
| 1448880_at   | 1.09156 ubiquitin-conjugating enzyme E2L 3                                | Ube2l3      |
| 1448881_at   | 1.08273 haptoglobin                                                       | Hp          |
| 1448882_at   | 1.00483 transmembrane protein 93                                          | Tmem93      |
| 1448883_at   | 0.87029 legumain                                                          | Lgmn        |
| 1448884_at   | 1.10208 "general transcription factor II E, polypeptide 2 (beta subunit)" | Gtf2e2      |
| 1448885_at   | 1.05930 "RAP2B, member of RAS oncogene family"                            | Rap2b       |
| 1448886_at   | 1.23528 GATA binding protein 3                                            | Gata3       |
| 1448887_x_at | 1.06232 fractured callus expressed transcript 1                           | Fxc1        |
| 1448888_at   | 0.95707 "protein phosphatase 1, regulatory (inhibitor) subunit 7"         | Ppp1r7      |
| 1448889_at   | 0.94823 "solute carrier family 38, member 4"                              | Slc38a4     |
| 1448890_at   | 0.67991 Kruppel-like factor 2 (lung)                                      | Klf2        |
| 1448891_at   | 0.88996 macrophage scavenger receptor 2                                   | Msr2        |
| 1448892_at   | 1.04261 dedicator of cytokinesis 7                                        | Dock7       |
| 1448893_at   | 0.82879 nuclear receptor co-repressor 2                                   | Ncor2       |
| 1448894_at   | 1.02621 "aldo-keto reductase family 1, member B8"                         | Akr1b8      |
| 1448895_a_at | 0.93535 "catenin (cadherin associated protein), alpha 2"                  | Ctnna2      |
| 1448896_at   | 0.98630 "phosphatidylinositol glycan anchor biosynthesis, class F"        | Pigf        |
| 1448897_at   | 0.82371 "makorin, ring finger protein, 2"                                 | Mkrn2       |
| 1448898_at   | 1.15998 chemokine (C-C motif) ligand 9                                    | Ccl9        |
| 1448899_s_at | 0.98528 RAD51 associated protein 1                                        | Rad51ap1    |
| 1448900_at   | 1.04110 "DNA segment, Chr 16, human D22S680E, expressed"                  | D16H22S680E |
| 1448901_at   | 0.92097 carboxypeptidase X 1 (M14 family)                                 | Cpxm1       |
| 1448902_at   | 0.93873 tetratricopeptide repeat domain 23                                | Ttc23       |
| 1448903_at   | 0.97756 selenoprotein 15-Sep                                              |             |
| 1448904_at   | 0.75656 "DNA segment, Chr 6, Wayne State University 176, expressed"       | D6Wsu176e   |
| 1448905_at   | 1.02848 expressed in non-metastatic cells 3                               | Nme3        |
| 1448906_at   | 0.58456 cadherin 16                                                       | Cdh16       |
| 1448907_at   | 0.86548 thimet oligopeptidase 1                                           | Thop1       |

1448908\_at 0.75860 phosphatidic acid phosphatase type 2B Ppap2b  
1448909\_a\_at 1.06824 mitochondrial ribosomal protein L39 Mrpl39  
1448910\_at 1.07143 peroxisomal trans-2-enoyl-CoA reductase Pecr  
1448911\_at 1.19246 "ATPase, H<sup>+</sup>/K<sup>+</sup> exchanging, beta polypeptide" Atp4b  
1448912\_at 0.82442 C1q and tumor necrosis factor related protein 1 C1qtnf1  
1448913\_at 0.91652 "SWI/SNF related, matrix associated, actin dependent regulator of chromatin, subfamily d, member 1" Smarcd1  
1448914\_a\_at 1.38730 colony stimulating factor 1 (macrophage) Csf1  
1448915\_at 0.90618 zinc finger protein 524 Zfp524  
1448916\_at 1.18876 "v-maf musculoaponeurotic fibrosarcoma oncogene family, protein G (avian)" Mafg  
1448917\_at 1.01992 thyroid hormone receptor associated protein 6 Thrap6  
1448918\_at 1.06283 "solute carrier organic anion transporter family, member 3a1" Slco3a1  
1448919\_at 0.99902 CD302 antigen Cd302  
1448920\_at 1.04254 zinc finger protein 535 Zfp535  
1448921\_a\_at 1.03503 mitochondrial ribosomal protein S9 Mrps9  
1448922\_at 1.06504 dual specificity phosphatase 19 Dusp19  
1448923\_at 1.04190 "protein kinase, interferon inducible double stranded RNA dependent activator" Prkra  
1448924\_at 0.99622 RIKEN cDNA 4432406C05 gene 4432406C05Rik  
1448925\_at 0.81421 twist homolog 2 (Drosophila) Twist2  
1448926\_at 0.86579 homeo box A5 Hoxa5  
1448927\_at 0.86925 "potassium intermediate/small conductance calcium-activated channel, subfamily N, member 2" Kcnn2  
1448928\_at 0.96301 histone deacetylase 6 /// similar to Histone deacetylase 6 (HD6) (Histone deacetylase mHDA2) Hdac6 /// LOC669168  
1448929\_at 0.94676 "coagulation factor XIII, A1 subunit" F13a1  
1448930\_at 0.90578 RIKEN cDNA 3010026O09 gene 3010026O09Rik  
1448931\_at 0.87203 coagulation factor II (thrombin) receptor-like 1 F2rl1  
1448932\_at 0.92182 keratin 16 Krt16  
1448933\_at 0.71348 protocadherin beta 17 Pcdhb17  
1448934\_at 0.97934 NADH dehydrogenase (ubiquinone) 1 alpha subcomplex 10 Ndufa10  
1448935\_at 0.89832 "chromodomain protein, Y chromosome-like" Cdyl  
1448936\_at 0.96398 syntaxin 12 Stx12  
1448937\_at 0.96001 "solute carrier family 35, member B3" Slc35b3  
1448938\_at 0.96649 replication protein A3 Rpa3  
1448939\_at 0.85972 ubiquitin specific peptidase 25 Usp25  
1448940\_at 0.94974 tripartite motif protein 21 Trim21  
1448941\_at 0.94611 "UDP-Gal:betaGlcNAc beta 1,4- galactosyltransferase, polypeptide 2" B4galt2  
1448942\_at 0.85567 "guanine nucleotide binding protein (G protein), gamma 11" Gng11  
1448943\_at 0.56573 neuropilin 1 Nrp1  
1448944\_at 0.54203 neuropilin 1 Nrp1



1448945\_at 1.06424 plasma membrane proteolipid Pllp  
1448946\_at 0.96583 kinesin family member 3C Kif3c  
1448947\_at 0.99337 RIKEN cDNA 2810004N23 gene 2810004N23Rik  
1448948\_at 0.92565 recombination activating gene 1 activating protein 1 Rag1ap1  
1448949\_at 1.08167 carbonic anhydrase 4 Car4  
1448950\_at 0.90121 "interleukin 1 receptor, type I" Il1r1  
1448951\_at 1.07672 "tumor necrosis factor receptor superfamily, member 1b" Tnfrsf1b  
1448952\_at 0.81979 RIKEN cDNA A030009H04 gene A030009H04Rik  
1448953\_at 1.17539 Bloom syndrome homolog (human) Blm  
1448954\_at 0.90349 nuclear receptor interacting protein 3 Nrip3  
1448955\_s\_at 0.95689 Ca<sup>2+</sup>dependent activator protein for secretion Cadps  
1448956\_at 0.75399 START domain containing 10 Stard10  
1448957\_at 1.06306 recombining binding protein suppressor of hairless (Drosophila) Rbpsuh  
1448958\_at 0.96180 interferon alpha responsive gene Ifrg15  
1448959\_at 1.07532 NADH dehydrogenase (ubiquinone) Fe-S protein 4 Ndufs4  
1448960\_at 0.59192 CXXC finger 5 Cxxc5  
1448961\_at 1.12433 phospholipid scramblase 2 Plscr2  
1448962\_at 0.91906 "myosin, heavy polypeptide 11, smooth muscle" Myh11  
1448963\_at 0.92431 nuclear transcription factor-Y gamma Nfyc  
1448964\_at 1.04891 S100 calcium binding protein G S100g  
1448965\_at 0.80634 INO80 complex homolog 1 (S. cerevisiae) Inoc1  
1448966\_a\_at 0.79249 nuclear factor of activated T-cells 5 Nfat5  
1448967\_at 0.89283 nipsnap homolog 3A (C. elegans) Nipsnap3a  
1448968\_at 0.99884 "DNA segment, Chr 7, Wayne State University 128, expressed" D7Wsu128e  
1448969\_at 0.88869 FtsJ homolog 2 (E. coli) Ftsj2  
1448970\_at 0.99391 RIKEN cDNA 1200007B05 gene 1200007B05Rik  
1448971\_at 1.23948 RIKEN cDNA 2410022L05 gene 2410022L05Rik  
1448972\_at 0.94887 "glutamate receptor, ionotropic, AMPA1 (alpha 1)" Gria1  
1448973\_at 1.05036 "sulfotransferase family 1D, member 1" Sult1d1  
1448974\_at 0.93691 doublecortin Dcx  
1448975\_s\_at 1.05292 renin 1 structural /// renin 2 tandem duplication of Ren1 Ren1 /// Ren2  
1448976\_at 0.99171 tuftelin interacting protein 11 Tfip11  
1448977\_at 1.02070 "transcription factor AP-2, gamma" Tcfap2c  
1448978\_at 0.84114 neuronal guanine nucleotide exchange factor Ngef  
1448979\_at 0.92704 muted Muted  
1448980\_at 1.09574 ghrelin Ghrl  
1448981\_x\_at 0.94745 "T-cell leukemia/lymphoma 1B, 1" Tcl1b1  
1448982\_at 0.98698 kallikrein 6 Klk6  
1448983\_at 1.05331 CMT1A duplicated region transcript 4 Cdrt4  
1448984\_at 0.94024 "excision repair cross-complementing rodent repair deficiency, complementation group 4" Ercc4  
1448985\_at 0.99384 dual specificity phosphatase 22 Dusp22  
1448986\_x\_at 0.94206 deoxyribonuclease II alpha Dnase2a

1448987\_at 0.96360 "acyl-Coenzyme A dehydrogenase, long-chain" Acadl  
1448988\_at 0.96622 "acyl-Coenzyme A dehydrogenase, long-chain" Acadl  
1448989\_a\_at 1.02845 myosin IB Myo1b  
1448990\_a\_at 1.12797 myosin IB Myo1b  
1448991\_a\_at 0.92993 "internexin neuronal intermediate filament protein, alpha" Ina  
1448992\_at 1.02805 "internexin neuronal intermediate filament protein, alpha" Ina  
1448993\_at 1.03100 autophagy-related 3 (yeast) Atg3  
1448994\_at 0.94012 trans-acting transcription factor 1 Sp1  
1448995\_at 1.44155 chemokine (C-X-C motif) ligand 4 Cxcl4  
1448996\_at 1.02410 rod outer segment membrane protein 1 Rom1  
1448997\_at 0.96430 "pleckstrin homology, Sec7 and coiled-coil domains 1" Pscd1  
1448998\_at 1.07254 lactoperoxidase Lpo  
1448999\_at 0.92576 trafficking protein particle complex 5 Trappc5  
1449000\_at 0.91982 "DNA segment, Chr 10, Johns Hopkins University 81 expressed" D10Jhu81e  
1449001\_at 0.84891 isovaleryl coenzyme A dehydrogenase Ivd  
1449002\_at 0.96060 "pleckstrin homology-like domain, family A, member 3" Phlda3  
1449003\_a\_at 1.04337 vesicle transport through interaction with t-SNAREs 1B homolog Vti1b  
1449004\_at 1.03538 mitochondrial ribosomal protein L46 Mrpl46  
1449005\_at 1.52308 "solute carrier family 16 (monocarboxylic acid transporters), member 3" Slc16a3  
1449006\_at 1.03854 "galactosidase, alpha" Gla  
1449007\_at 1.08608 B-cell translocation gene 3 /// similar to BTG3 protein (Tob5 protein)  
(Abundant in neuroepithelium area protein) /// B-cell translocation gene 3 pseudogene Btg3 ///  
LOC640416 /// LOC654432  
1449008\_at 1.07374 tubby-like protein 3 Tulp3  
1449009\_at 1.13992 T-cell specific GTPase Tgtp  
1449010\_at 1.05688 heat shock protein 4 like Hspa4l  
1449011\_at 0.72663 "solute carrier family 12, member 7" Slc12a7  
1449012\_s\_at 0.82644 fibronectin type III domain containing 4 Fndc4  
1449013\_at 0.87807 eukaryotic elongation factor-2 kinase Eef2k  
1449014\_at 0.93871 "lactamase, beta" Lactb  
1449015\_at 0.91964 resistin like alpha Retnla  
1449016\_at 0.95455 zona pellucida glycoprotein 2 Zp2  
1449017\_at 0.86138 nuclear transport factor 2 Nutf2  
1449018\_at 1.02484 profilin 1 Pfn1  
1449019\_at 0.98723 A kinase (PRKA) anchor protein 1 Akap1  
1449020\_at 0.85623 phospholipid scramblase 3 Plscr3  
1449021\_at 0.94152 ribonuclease P 21 subunit (human) Rpp21  
1449022\_at 1.07752 nestin Nes  
1449023\_a\_at 1.01589 enhancer of zeste homolog 1 (Drosophila) Ezh1  
1449024\_a\_at 0.92556 hexosaminidase A Hexa  
1449025\_at 1.43011 interferon-induced protein with tetratricopeptide repeats 3 Ifit3  
1449026\_at 1.07887 interferon (alpha and beta) receptor 1 Ifnar1  
1449027\_at 0.98538 "ras homolog gene family, member U" Rhou

1449028\_at 0.95319 "ras homolog gene family, member U" Rhou  
 1449029\_at 0.90160 MAP kinase-interacting serine/threonine kinase 2 Mknk2  
 1449030\_at 0.90958 synapsin II Syn2  
 1449031\_at 0.89762 Cbp/p300-interacting transactivator with Glu/Asp-rich carboxy-terminal domain  
 1 Cited1  
 1449032\_at 0.91365 prolactin-like protein M Prlpm  
 1449033\_at 0.99000 "tumor necrosis factor receptor superfamily, member 11b (osteoprotegerin)"  
 Tnfrsf11b  
 1449034\_at 0.84556 "kallikrein B, plasma 1" Klkb1  
 1449035\_at 1.00566 RIKEN cDNA 4930544G11 gene 4930544G11Rik  
 1449036\_at 0.92261 ring finger protein 128 Rnf128  
 1449037\_at 0.78141 cAMP responsive element modulator Crem  
 1449038\_at 0.89144 hydroxysteroid 11-beta dehydrogenase 1 Hsd11b1  
 1449039\_a\_at 0.98589 heterogeneous nuclear ribonucleoprotein D-like Hnrpdl  
 1449040\_a\_at 1.06687 selenophosphate synthetase 2 Sephs2  
 1449041\_a\_at 0.91699 thyroid hormone receptor interactor 6 Trip6  
 1449042\_at 0.92850 CCCTC-binding factor Ctf  
 1449043\_at 0.87233 "N-acetyl galactosaminidase, alpha" Naga  
 1449044\_at 1.17771 eukaryotic translation elongation factor 1 epsilon 1 Eef1e1  
 1449045\_at 1.03408 AFG3(ATPase family gene 3)-like 1 (yeast) Afg3l1  
 1449046\_a\_at 0.93842 Josephin domain containing 2 Josd2  
 1449047\_at 1.13240 2-hydroxyacyl-CoA lyase 1 Hacl1  
 1449048\_s\_at 0.95138 "RAB4A, member RAS oncogene family" Rab4a  
 1449049\_at 0.80474 toll-like receptor 1 Tlr1  
 1449050\_at 0.95762 replication factor C 1 Recc1  
 1449051\_at 0.92071 peroxisome proliferator activated receptor alpha Ppara  
 1449052\_a\_at 0.91344 DNA methyltransferase 3B Dnmt3b  
 1449053\_s\_at 0.99078 component of oligomeric golgi complex 1 Cog1  
 1449054\_a\_at 0.99762 poly(rC) binding protein 4 Pcbp4  
 1449055\_x\_at 0.92501 poly(rC) binding protein 4 Pcbp4  
 1449056\_at 0.83915 RIKEN cDNA E330009J07 gene E330009J07Rik  
 1449057\_at 0.92486 Kell blood group Kel  
 1449058\_at 0.94270 GLI-Kruppel family member GLI1 Gli1  
 1449059\_a\_at 0.88456 3-oxoacid CoA transferase 1 Oxct1  
 1449060\_at 1.05857 kinesin family member 2C /// similar to Kinesin-like protein KIF2C (Mitotic  
 centromere-associated kinesin) (MCAK) Kif2c /// LOC631653  
 1449061\_a\_at 0.90372 "DNA primase, p49 subunit" Prim1  
 1449062\_at 0.84747 ketoheksokinase Khk  
 1449063\_at 0.93037 SEC22 vesicle trafficking protein homolog B (S. cerevisiae) Sec22b  
 1449064\_at 0.93315 L-threonine dehydrogenase Tdh  
 1449065\_at 0.89772 acyl-CoA thioesterase 1 Acot1  
 1449066\_a\_at 0.90792 Rho guanine nucleotide exchange factor (GEF7) Arhgef7  
 1449067\_at 0.93461 "solute carrier family 2 (facilitated glucose transporter), member 2" Slc2a2

1449068\_at 1.09335 zinc finger protein 148 Zfp148  
1449069\_at 1.05837 zinc finger protein 148 Zfp148  
1449070\_x\_at 0.42863 adenomatosis polyposis coli down-regulated 1 Apcdd1  
1449071\_at 0.90389 "myosin, light polypeptide 7, regulatory" Myl7  
1449072\_a\_at 1.06118 RIKEN cDNA 2510005D08 gene 2510005D08Rik  
1449073\_at 0.96013 "filamin C, gamma (actin binding protein 280)" Flnc  
1449074\_at 0.99614 RIKEN cDNA 1700019N12 gene 1700019N12Rik  
1449075\_at 0.81840 exonuclease 3"-5" domain-like 2 Exdl2  
1449076\_x\_at 0.91293 acireductone dioxygenase 1 Adi1  
1449077\_at 0.96611 erythroid associated factor Eraf  
1449078\_at 0.94073 "ST3 beta-galactoside alpha-2,3-sialyltransferase 6" St3gal6  
1449079\_s\_at 0.80268 "ST3 beta-galactoside alpha-2,3-sialyltransferase 6" St3gal6  
1449080\_at 0.86213 histone deacetylase 2 Hdac2  
1449081\_at 0.89970 carboxylesterase 3 Ces3  
1449082\_at 1.07462 microfibrillar associated protein 5 Mfap5  
1449083\_at 1.08476 coiled-coil domain containing 91 Ccdc91  
1449084\_s\_at 1.01106 SH3 domain protein D19 Sh3d19  
1449085\_at 1.19137 PHD finger protein 10 Phf10  
1449086\_at 0.90893 ring finger protein 141 Rnf141  
1449087\_at 1.02352 ring finger protein 141 Rnf141  
1449088\_at 0.96947 fructose bisphosphatase 2 Fbp2  
1449089\_at 0.90973 nuclear receptor interacting protein 1 Nrip1  
1449090\_a\_at 0.99745 Yamaguchi sarcoma viral (v-yes) oncogene homolog 1 Yes1  
1449091\_at 0.90031 claudin 8 Cldn8  
1449092\_at 0.88222 "protein phosphatase 1D magnesium-dependent, delta isoform" Ppm1d  
1449093\_at 0.84654 cardiotrophin 1 Ctf1  
1449094\_at 0.99928 gap junction membrane channel protein alpha 7 Gja7  
1449095\_at 1.02753 vacuolar protein sorting 54 (yeast) Vps54  
1449096\_at 1.01565 RIKEN cDNA 0610011N22 gene 0610011N22Rik  
1449097\_at 0.91234 thioredoxin reductase 2 Txnrd2  
1449098\_a\_at 1.04577 "polymerase (DNA directed), iota" Poli  
1449099\_at 0.92209 LPS-responsive beige-like anchor Lrba  
1449100\_at 0.92656 "par-6 (partitioning defective 6,) homolog alpha (C. elegans)" Pard6a  
1449101\_at 1.03519 early B-cell factor 2 Ebf2  
1449102\_at 0.99704 early B-cell factor 2 Ebf2  
1449103\_at 0.96865 testis expressed gene 101 Tex101  
1449104\_at 1.03764 uroplakin 3A Upk3a  
1449105\_at 0.97657 SH2 domain protein 2A Sh2d2a  
1449106\_at 0.97134 glutathione peroxidase 3 Gpx3  
1449107\_at 0.90081 nudix (nucleoside diphosphate linked moiety X)-type motif 4 Nudt4  
1449108\_at 1.01237 ferredoxin 1 Fdx1  
1449109\_at 0.51181 suppressor of cytokine signaling 2 Socs2  
1449110\_at 0.79782 "ras homolog gene family, member B" Rhob

1449111\_a\_at 0.92292 growth factor receptor bound protein 2 Grb2  
 1449112\_at 0.97499 "solute carrier family 27 (fatty acid transporter), member 5" Slc27a5  
 1449113\_at 0.88621 GC-rich promoter binding protein 1-like 1 Gpbp111  
 1449114\_at 1.02728 "serine/threonine kinase 3 (Ste20, yeast homolog)" Stk3  
 1449115\_at 1.02566 metal response element binding transcription factor 2 Mtf2  
 1449116\_a\_at 1.07284 deoxythymidylate kinase Dtymk  
 1449117\_at 0.86503 Jun proto-oncogene related gene d1 Jund1  
 1449118\_at 0.76431 dihydrolipoamide branched chain transacylase E2 Dbt  
 1449119\_at 1.03034 ariadne homolog 2 (Drosophila) Arih2  
 1449120\_a\_at 1.03036 pericentriolar material 1 Pcm1  
 1449121\_at 1.09893 FUS interacting protein (serine-arginine rich) 1 Fusip1  
 1449122\_at 0.91759 RIKEN cDNA 3110003A22 gene 3110003A22Rik  
 1449123\_at 1.16970 "inter-alpha trypsin inhibitor, heavy chain 3" Itih3  
 1449124\_at 0.90504 "ral guanine nucleotide dissociation stimulator,-like 1" Rgl1  
 1449125\_at 0.91350 "tumor necrosis factor, alpha-induced protein 8-like 1" Tnfaip8l1  
 1449126\_at 0.99567 zinc finger protein 90 Zfp90  
 1449127\_at 0.88849 "selectin, platelet (p-selectin) ligand" Selpl  
 1449128\_at 1.00331 coiled-coil domain containing 43 Ccdc43  
 1449129\_a\_at 1.06678 "Kv channel interacting protein 3, calsenilin" Kcnip3  
 1449130\_at 0.82716 CD1d1 antigen Cd1d1  
 1449131\_s\_at 0.77252 CD1d1 antigen Cd1d1  
 1449132\_at 1.02072 "opsin 1 (cone pigments), short-wave-sensitive (color blindness, tritan)"  
 Opnlsw  
 1449133\_at 1.14659 small proline-rich protein 1A Sprr1a  
 1449134\_s\_at 1.06210 Spi-C transcription factor (Spi-1/PU.1 related) Spic  
 1449135\_at 0.92933 SRY-box containing gene 18 Sox18  
 1449136\_at 0.96697 eosinophil peroxidase Epx  
 1449137\_at 0.95874 pyruvate dehydrogenase E1 alpha 1 Pdha1  
 1449138\_at 1.06289 "splicing factor 3b, subunit 1" Sf3b1  
 1449139\_at 1.04610 RIKEN cDNA 2310008M10 gene 2310008M10Rik  
 1449140\_at 1.01318 NudC domain containing 2 Nudcd2  
 1449141\_at 0.98980 filamin binding LIM protein 1 Fblim1  
 1449142\_a\_at 0.86778 "Yip1 domain family, member 5" Yipf5  
 1449143\_at 0.99119 receptor transporter protein 4 Rtp4  
 1449144\_at 0.95269 "guanine nucleotide binding protein, alpha 11" Gna11  
 1449145\_a\_at 1.05321 "caveolin, caveolae protein 1" Cav1  
 1449146\_at 0.89769 Notch gene homolog 4 (Drosophila) Notch4  
 1449147\_at 0.94065 carbohydrate (keratan sulfate Gal-6) sulfotransferase 1 Chst1  
 1449148\_a\_at 0.88141 putative homeodomain transcription factor 1 Phtf1  
 1449149\_at 0.94789 Tnf receptor-associated factor 3 Traf3  
 1449150\_at 0.94961 RIKEN cDNA A930040G15 gene A930040G15Rik  
 1449151\_at 1.02494 PCTAIRE-motif protein kinase 3 Pctk3  
 1449152\_at 1.08973 "cyclin-dependent kinase inhibitor 2B (p15, inhibits CDK4)" Cdkn2b

1449153\_at 1.03522 matrix metalloproteinase 12 Mmp12  
1449154\_at 0.98881 "procollagen, type XI, alpha 1" Col11a1  
1449155\_at 1.39785 polymerase (RNA) III (DNA directed) polypeptide G Polr3g  
1449156\_at 1.10287 lymphocyte antigen 9 Ly9  
1449157\_at 0.87256 "nuclear receptor subfamily 2, group C, member 1" Nr2c1  
1449158\_at 0.92617 "potassium channel, subfamily K, member 2" Kcnk2  
1449159\_at 0.96405 "guanine nucleotide binding protein, beta 3" Gnb3  
1449160\_at 0.98887 natriuretic peptide receptor 1 Npr1  
1449161\_at 0.75542 endothelin 2 Edn2  
1449162\_at 1.04110 "processing of precursor 7, ribonuclease P family, (S. cerevisiae)" Pop7  
1449163\_at 1.11576 single immunoglobulin and toll-interleukin 1 receptor (TIR) domain Sigirr  
1449164\_at 0.95534 CD68 antigen Cd68  
1449165\_at 0.89779 calpain 5 Capn5  
1449166\_at 1.09818 S100 calcium binding protein A14 S100a14  
1449167\_at 1.05818 erythrocyte protein band 4.1-like 4a Epb4.114a  
1449168\_a\_at 1.09796 A kinase (PRKA) anchor protein 2 Akap2  
1449169\_at 0.99319 hyaluronan synthase 2 Has2  
1449170\_at 0.95318 piwi-like homolog 2 (Drosophila) Piwil2  
1449171\_at 1.04624 Ttk protein kinase Ttk  
1449172\_a\_at 0.94268 lin-7 homolog B (C. elegans) Lin7b  
1449173\_at 0.82300 "membrane protein, palmitoylated 2 (MAGUK p55 subfamily member 2)"  
Mpp2  
1449174\_at 1.00861 ADP-ribosyltransferase 4 Art4  
1449175\_at 0.97729 G-protein coupled receptor 65 Gpr65  
1449176\_a\_at 0.90128 deoxycytidine kinase Dck  
1449177\_at 0.92068 cyclin A1 Ccna1  
1449178\_at 0.95925 PDZ and LIM domain 3 Pdlim3  
1449179\_at 0.95949 phosducin Pdc  
1449180\_at 1.05131 potassium channel modulatory factor 1 Kcmf1  
1449181\_at 0.94799 ferrochelatase Fech  
1449182\_at 0.88483 resistin Retn  
1449183\_at 0.98845 catechol-O-methyltransferase Comt  
1449184\_at 1.15375 peptidoglycan recognition protein 1 Pglyrp1  
1449185\_at 1.07363 cone-rod homeobox containing gene Crx  
1449186\_at 0.92878 BCL2-associated athanogene 4 Bag4  
1449187\_at 0.96629 "platelet derived growth factor, alpha" Pdgfa  
1449188\_at 0.79298 midnolin Midn  
1449189\_at 0.92675 cDNA sequence BC003266 BC003266  
1449190\_a\_at 1.06562 ectonucleoside triphosphate diphosphohydrolase 4 Entpd4  
1449191\_at 0.99892 WAP four-disulfide core domain 12 Wfdc12  
1449192\_at 0.98379 activating transcription factor 7 interacting protein Atf7ip  
1449193\_at 0.96038 CD5 antigen-like Cd5l  
1449194\_at 1.08072 mitochondrial ribosomal protein S25 Mrps25

1449195\_s\_at 1.81500 chemokine (C-X-C motif) ligand 16 Cxcl16  
 1449196\_a\_at 0.99969 ribosomal protein S27a /// similar to ribosomal protein S27a /// similar to ubiquitin B precursor /// similar to ribosomal protein S27a /// similar to ribosomal protein S27a /// similar to ribosomal protein S27a Rps27a /// LOC619900 /// LOC625981 /// LOC639567 /// LOC667035 /// LOC677303  
 1449197\_at 0.97410 RIKEN cDNA 2310040A13 gene 2310040A13Rik  
 1449198\_a\_at 0.85521 "ST3 beta-galactoside alpha-2,3-sialyltransferase 5" St3gal5  
 1449199\_at 1.60251 "mucin 1, transmembrane" Muc1  
 1449200\_at 1.09101 nucleoporin 155 Nup155  
 1449201\_at 1.13391 steroidogenic acute regulatory protein Star  
 1449202\_at 0.70415 "sema domain, immunoglobulin domain (Ig), transmembrane domain (TM) and short cytoplasmic domain, (semaphorin) 4G" Sema4g  
 1449203\_at 0.99129 "solute carrier organic anion transporter family, member 1a5" Slco1a5  
 1449204\_at 1.01059 gap junction membrane channel protein beta 5 Gjb5  
 1449205\_at 1.04298 ovo-like 2 (Drosophila) Ovol2  
 1449206\_at 1.11326 synaptophysin-like 2 Sypl2  
 1449207\_a\_at 0.97618 kinesin family member 20A Kif20a  
 1449208\_at 0.82427 poly (A) polymerase beta (testis specific) Papolb  
 1449209\_a\_at 1.21569 retinol dehydrogenase 11 Rdh11  
 1449210\_at 1.17068 insulin-like growth factor 2 mRNA binding protein 1 Igf2bp1  
 1449211\_at 1.03413 bisphosphate 3'-nucleotidase 1 Bpnt1  
 1449212\_at 1.02167 prolactin induced protein Pip  
 1449213\_at 1.02018 "L antigen family, member 3" Lage3  
 1449214\_a\_at 1.12748 optic atrophy 1 homolog (human) Opa1  
 1449215\_at 0.89954 "solute carrier family 22 (organic cation transporter), member 21" Slc22a21  
 1449216\_at 0.95010 "integrin, alpha E, epithelial-associated" Itgae  
 1449217\_at 0.90983 caspase 8 associated protein 2 Casp8ap2  
 1449218\_at 1.04743 "cytochrome c oxidase, subunit VIIIb" Cox8b  
 1449219\_at 0.84380 fatty acid desaturase 3 Fads3  
 1449220\_at 0.97385 "GTPase, IMAP family member 3" Gimap3  
 1449221\_a\_at 1.34171 ribosome binding protein 1 Rrbp1  
 1449222\_at 1.04061 Epstein-Barr virus induced gene 3 Ebi3  
 1449223\_at 1.02876 "DnaJ (Hsp40) homolog, subfamily B, member 8" Dnajb8  
 1449224\_at 1.07948 "transient receptor potential cation channel, subfamily M, member 5" Trpm5  
 1449225\_a\_at 0.92943 mitogen-activated protein kinase 8 interacting protein 2 Mapk8ip2  
 1449226\_at 1.00288 hypermethylated in cancer 1 Hic1  
 1449227\_at 0.98211 cholesterol 25-hydroxylase Ch25h  
 1449228\_at 0.94211 SH3-domain GRB2-like 2 Sh3gl2  
 1449229\_a\_at 0.93151 cyclin-dependent kinase-like 2 (CDC2-related kinase) Cdkl2  
 1449230\_at 0.88809 "iduronidase, alpha-L-" Idua  
 1449231\_at 0.95472 zinc finger protein 296 Zfp296  
 1449232\_at 1.09330 GATA binding protein 1 Gata1  
 1449233\_at 1.06361 "basic helix-loop-helix domain containing, class B, 8" Bhlhb8

|              |                                                                     |               |           |
|--------------|---------------------------------------------------------------------|---------------|-----------|
| 1449234_at   | 1.03267 carbonic anhydrase 15                                       | Car15         |           |
| 1449235_at   | 1.00651 "Fas ligand (TNF superfamily, member 6)"                    |               | Fasl      |
| 1449236_at   | 1.02721 delta-like 3 (Drosophila)                                   | Dll3          |           |
| 1449237_at   | 0.95720 arachidonate lipoxygenase 3                                 | Aloxe3        |           |
| 1449238_at   | 1.12484 pregnancy specific glycoprotein 16                          | Psg16         |           |
| 1449239_at   | 0.88938 RIKEN cDNA 1700045I19 gene                                  | 1700045I19Rik |           |
| 1449240_at   | 1.05702 G substrate                                                 | Gsbs          |           |
| 1449241_at   | 1.00602 kelch-like 1 (Drosophila)                                   | Klhl1         |           |
| 1449242_s_at | 1.03951 histidine-rich glycoprotein                                 | Hrg           |           |
| 1449243_a_at | 1.08703 ribosomal protein S19                                       | Rps19         |           |
| 1449244_at   | 0.86353 cadherin 2                                                  | Cdh2          |           |
| 1449245_at   | 1.01385 "glutamate receptor, ionotropic, NMDA2C (epsilon 3)"        |               | Grin2c    |
| 1449246_at   | 1.00642 Rap2 interacting protein                                    | Rap2ip        |           |
| 1449247_at   | 0.91708 actin-related protein T2                                    | Actrt2        |           |
| 1449248_at   | 0.74489 chloride channel 2                                          | Clcn2         |           |
| 1449249_at   | 0.91745 protocadherin 7                                             | Pcdh7         |           |
| 1449250_at   | 1.17217 papillary renal cell carcinoma (translocation-associated)   |               | Prcc      |
| 1449251_at   | 0.96288 Norrie disease homolog                                      | Ndph          |           |
| 1449252_at   | 0.92627 RIKEN cDNA 9030611O19 gene                                  | 9030611O19Rik |           |
| 1449253_at   | 1.00864 structural maintenance of chromosomes 1B                    | Smc1b         |           |
| 1449254_at   | 0.93291 secreted phosphoprotein 1                                   | Spp1          |           |
| 1449255_a_at | 1.03408 ribosomal protein L15                                       | Rpl15         |           |
| 1449256_a_at | 1.00221 "RAB11a, member RAS oncogene family"                        | Rab11a        |           |
| 1449257_at   | 0.93191 "DNA segment, Chr 11, Wayne State University 99, expressed" |               | D11Wsu99e |
| 1449258_at   | 1.08123 "DNA segment, Chr 11, Wayne State University 99, expressed" |               | D11Wsu99e |
| 1449259_at   | 0.78901 "RAB3D, member RAS oncogene family"                         | Rab3d         |           |
| 1449260_at   | 0.97196 "RAB3D, member RAS oncogene family"                         | Rab3d         |           |
| 1449261_at   | 0.99132 pre B-cell leukemia transcription factor 2                  | Pbx2          |           |
| 1449262_s_at | 0.86146 lin-7 homolog C (C. elegans)                                | Lin7c         |           |
| 1449263_at   | 1.08196 ubiquitin-fold modifier 1                                   | Ufm1          |           |
| 1449264_at   | 0.82358 synaptotagmin XI                                            | Syt11         |           |
| 1449265_at   | 1.04754 caspase 1                                                   | Casp1         |           |
| 1449266_at   | 1.00306 methyl CpG binding protein 2                                | Mecp2         |           |
| 1449267_at   | 0.85462 RIKEN cDNA 3110023E09 gene                                  | 3110023E09Rik |           |
| 1449268_at   | 1.01168 glutamine fructose-6-phosphate transaminase 1               | Gfpt1         |           |
| 1449269_at   | 0.99206 coagulation factor V                                        | F5            |           |
| 1449270_at   | 1.07469 plexin domain containing 2                                  | Plxdc2        |           |
| 1449271_a_at | 0.84618 heme binding protein 2                                      | Hebp2         |           |
| 1449272_at   | 1.12311 "immunoglobulin superfamily, member 4B"                     | Igsf4b        |           |
| 1449273_at   | 0.87228 cytoplasmic FMR1 interacting protein 2                      | Cyfi2         |           |
| 1449274_at   | 0.91038 RIKEN cDNA 2310038H17 gene                                  | 2310038H17Rik |           |
| 1449275_at   | 1.17651 RIKEN cDNA 2310038H17 gene                                  | 2310038H17Rik |           |
| 1449276_at   | 0.97171 RIKEN cDNA 1700029P11 gene                                  | 1700029P11Rik |           |



1449277\_at 0.94081 chemokine (C-C motif) ligand 19 Ccl19  
1449278\_at 0.89886 eukaryotic translation initiation factor 2 alpha kinase 3 Eif2ak3  
1449279\_at 0.96765 glutathione peroxidase 2 Gpx2  
1449280\_at 0.90547 endothelial cell-specific molecule 1 /// similar to Endothelial cell-specific molecule 1 precursor (ESM-1 secretory protein) (ESM-1) Esm1 /// LOC632677  
1449281\_at 0.91199 neurturin Nrtn  
1449282\_at 0.90551 cysteinyl leukotriene receptor 1 Cysltr1  
1449283\_a\_at 1.16238 mitogen-activated protein kinase 12 Mapk12  
1449284\_at 0.86644 RIKEN cDNA 1700008P20 gene 1700008P20Rik  
1449285\_at 0.81426 cystatin 9 Cst9  
1449286\_at 0.98995 netrin G1 Ntng1  
1449287\_at 0.94727 src-related kinase lacking C-terminal regulatory tyrosine and N-terminal myristylation sites Srms  
1449288\_at 1.03014 growth differentiation factor 3 Gdf3  
1449289\_a\_at 1.09618 beta-2 microglobulin B2m  
1449290\_at 0.81246 dihydropyrimidinase-like 5 Dpysl5  
1449291\_a\_at 0.99455 "discoidin, CUB and LCCL domain containing 1" Dcbl1  
1449292\_at 0.84764 RB1-inducible coiled-coil 1 Rb1cc1  
1449293\_a\_at 1.09642 S-phase kinase-associated protein 2 (p45) Skp2  
1449294\_at 0.99580 mitochondrial ribosomal protein S15 Mrps15  
1449295\_at 1.04567 SAP30 binding protein Sap30bp  
1449296\_a\_at 0.93434 cyclic nucleotide phosphodiesterase 1 Cnp1  
1449297\_at 0.99715 caspase 12 Casp12  
1449298\_a\_at 0.97594 "phosphodiesterase 1A, calmodulin-dependent" Pde1a  
1449299\_at 0.85437 similar to Low-density lipoprotein receptor-related protein 5 precursor (LRP7) (Lr3) LOC670589  
1449300\_at 0.92372 CTTNBP2 N-terminal like Ctnnbp2nl  
1449301\_at 1.04849 "solute carrier family 7, (cationic amino acid transporter, y+ system) member 13" Slc7a13  
1449302\_at 1.04646 "ATP-binding cassette, sub-family A (ABC1), member 2" Abca2  
1449303\_at 0.85850 sestrin 3 Sesn3  
1449304\_at 0.85201 RIKEN cDNA 2310061J03 gene 2310061J03Rik  
1449305\_at 0.94570 coagulation factor X F10  
1449306\_at 0.98639 heat shock factor 2 Hsf2  
1449307\_at 1.15814 dysbindin (dystrobrevin binding protein 1) domain containing 1 Dbn1  
1449308\_at 1.05876 complement component 6 C6  
1449309\_at 0.94430 "cytochrome P450, family 8, subfamily b, polypeptide 1" Cyp8b1  
1449310\_at 0.97733 prostaglandin E receptor 2 (subtype EP2) Ptger2  
1449311\_at 0.96432 BTB and CNC homology 1 Bach1  
1449312\_at 0.90670 neuropeptide Y receptor Y5 Npy5r  
1449313\_at 1.02517 kallikrein 1-related peptidase b5 Klk1b5  
1449314\_at 1.14202 "zinc finger protein, multitype 2" Zfp2  
1449315\_at 0.91402 odd Oz/ten-m homolog 3 (Drosophila) Odz3

1449316\_at 1.05577 "cytochrome P450, family 4, subfamily f, polypeptide 15" Cyp4f15  
 1449317\_at 0.92590 CASP8 and FADD-like apoptosis regulator Cflar  
 1449318\_at 1.27383 "tubulin, gamma 2" Tubg2  
 1449319\_at 1.05348 R-spondin homolog (Xenopus laevis) Rspo1  
 1449320\_at 1.01796 probasin Pbsn  
 1449321\_x\_at 0.99735 "serine (or cysteine) peptidase inhibitor, clade A, member 1a /// serine (or cysteine) peptidase inhibitor, clade A, member 1b /// serine (or cysteine) peptidase inhibitor, clade A, member 1c /// serine (or cysteine) peptidase inhibitor, clade A, member 1d /// serine (or cysteine) peptidase inhibitor, clade A, member 1e /// similar to Alpha-1-antitrypsin 1-2 precursor (Serine protease inhibitor 1-2) (Alpha-1 protease inhibitor 2) (Alpha-1-antiproteinase) (AAT)" Serpina1a /// Serpina1b /// Serpina1c /// Serpina1d /// Serpina1e /// LOC675501  
 1449322\_at 0.97597 protein tyrosine phosphatase 4a1 /// similar to protein tyrosine phosphatase 4a1 /// protein tyrosine phosphatase 4a1-like /// similar to protein tyrosine phosphatase 4a1 /// protein tyrosine phosphatase 4a1 pseudogene /// protein tyrosine phosphatase 4a1-like /// similar to protein tyrosine phosphatase 4a1 /// similar to protein tyrosine phosphatase 4a1 /// similar to protein tyrosine phosphatase 4a1 Ptp4a1 /// LOC269859 /// LOC433406 /// LOC546482 /// LOC627166 /// LOC627200 /// LOC667723 /// LOC669215 /// LOC673579  
 1449323\_a\_at 1.00566 ribosomal protein L3 /// similar to ribosomal protein L3 isoform b /// similar to 60S ribosomal protein L3 (J1 protein) /// similar to 60S ribosomal protein L3 (J1 protein) /// similar to ribosomal protein L3 isoform b Rpl3 /// LOC668219 /// LOC669672 /// LOC674810 /// LOC674874  
 1449324\_at 1.39869 ERO1-like (*S. cerevisiae*) Ero1l  
 1449325\_at 1.12407 fatty acid desaturase 2 Fads2  
 1449326\_x\_at 0.97261 serum amyloid A 2 Saa2  
 1449327\_at 0.99718 RIKEN cDNA 1600015I10 gene 1600015I10Rik  
 1449328\_at 0.95214 lymphocyte antigen 75 Ly75  
 1449329\_at 0.93929 zinc finger protein 235 Zfp235  
 1449330\_at 0.92733 PDZ domain containing 3 Pdzd3  
 1449331\_a\_at 0.81336 receptor-associated protein of the synapse Rapsn  
 1449332\_at 0.87508 four and a half LIM domains 5 Fhl5  
 1449333\_at 1.11593 "splicing factor 3a, subunit 1" Sf3a1  
 1449334\_at 0.70697 tissue inhibitor of metalloproteinase 3 Timp3  
 1449335\_at 0.73877 tissue inhibitor of metalloproteinase 3 Timp3  
 1449336\_a\_at 1.08580 STE20-like kinase (yeast) Slk  
 1449337\_at 0.97698 "tryptophan 2,3-dioxygenase" Tdo2  
 1449338\_at 1.12487 "DNA segment, Chr 10, ERATO Doi 641, expressed" D10Ertd641e  
 1449339\_at 1.01086 "DNA segment, Chr 10, ERATO Doi 641, expressed" D10Ertd641e  
 1449340\_at 1.10298 sclerostin domain containing 1 Sostdc1  
 1449341\_a\_at 0.93797 stomatin Stom  
 1449342\_at 1.02733 "protein tyrosine phosphatase-like (proline instead of catalytic arginine), member b" Ptplb  
 1449343\_s\_at 1.04698 "transcriptional regulator, SIN3A (yeast)" Sin3a  
 1449344\_s\_at 1.03113 RIKEN cDNA 2210409E12 gene 2210409E12Rik  
 1449345\_at 0.96262 RIKEN cDNA 2810027O19 gene 2810027O19Rik

1449346\_s\_at 0.90919 RIO kinase 1 (yeast) Riok1  
 1449347\_a\_at 0.98374 X-linked lymphocyte-regulated 4B /// X-linked lymphocyte-regulated 4A /// X-linked lymphocyte-regulated 4E Xlr4b /// Xlr4a /// Xlr4e  
 1449348\_at 1.15350 "membrane protein, palmitoylated 6 (MAGUK p55 subfamily member 6)" Mpp6  
 1449349\_at 0.93051 nudix (nucleoside diphosphate linked moiety X)-type motif 1 Nudt1  
 1449350\_at 0.97134 odd-skipped related 1 (Drosophila) Osr1  
 1449351\_s\_at 0.68483 "platelet-derived growth factor, C polypeptide" Pdgfc  
 1449352\_at 0.93199 "polymerase (DNA directed), lambda" Poll  
 1449353\_at 1.14633 zinc finger matrin type 3 Zmat3  
 1449354\_at 1.03326 "U2 small nuclear ribonucleoprotein auxiliary factor (U2AF) 1, related sequence 1" U2af1-rs1  
 1449355\_a\_at 0.90672 epidermal growth factor receptor pathway substrate 15-like 1 Eps15l1  
 1449356\_at 1.00632 ankyrin repeat and SOCs box-containing protein 5 Asb5  
 1449357\_at 0.91331 RIKEN cDNA 2310030G06 gene 2310030G06Rik  
 1449358\_at 1.06738 "DNA segment, Chr 6, Miriam Meisler 5, expressed" D6Mm5e  
 1449359\_at 0.92527 paired box gene 1 Pax1  
 1449360\_at 0.84034 "colony stimulating factor 2 receptor, beta 2, low-affinity (granulocyte-macrophage)" Csf2rb2  
 1449361\_at 0.97701 T-box 21 Tbx21  
 1449362\_a\_at 1.08771 misshapen-like kinase 1 (zebrafish) Mink1  
 1449363\_at 0.70112 activating transcription factor 3 Atf3  
 1449364\_at 0.96933 aurora kinase C Aurkc  
 1449365\_at 0.82927 "endothelial differentiation, sphingolipid G-protein-coupled receptor, 8" Edg8  
 1449366\_at 0.82975 matrix metalloproteinase 8 Mmp8  
 1449367\_at 1.01629 three prime repair exonuclease 2 Trex2  
 1449368\_at 0.61091 decorin Dcn  
 1449369\_at 0.90853 "transmembrane protease, serine 2" Tmprss2  
 1449370\_at 0.70917 SRY-box containing gene 4 /// similar to Transcription factor SOX-4 Sox4 /// LOC672274  
 1449371\_at 1.01368 histidyl-tRNA synthetase-like Harsl  
 1449372\_at 0.91090 "DnaJ (Hsp40) homolog, subfamily C, member 3" Dnajc3  
 1449373\_at 0.96592 "DnaJ (Hsp40) homolog, subfamily C, member 3" Dnajc3  
 1449374\_at 0.98067 pipercolic acid oxidase Pipox  
 1449375\_at 0.95873 carboxylesterase 6 Ces6  
 1449376\_at 0.94493 nicolin 1 Nicn1  
 1449377\_at 0.84687 nicolin 1 Nicn1  
 1449378\_at 1.09034 keratin 27 Krt27  
 1449379\_at 0.88050 kinase insert domain protein receptor Kdr  
 1449380\_at 0.97900 protein kinase C and casein kinase substrate in neurons 1 Pacsin1  
 1449381\_a\_at 0.92566 protein kinase C and casein kinase substrate in neurons 1 Pacsin1  
 1449382\_at 1.05703 "solute carrier family 6 (neurotransmitter transporter, betaine/GABA), member

## 12" Slc6a12

|              |         |                                                                  |               |
|--------------|---------|------------------------------------------------------------------|---------------|
| 1449383_at   | 0.87591 | adenylosuccinate synthetase like 1                               | Adssl1        |
| 1449384_at   | 0.96773 | RIKEN cDNA 4931417E11 gene                                       | 4931417E11Rik |
| 1449385_at   | 1.09179 | hydroxysteroid (17-beta) dehydrogenase 9                         | Hsd17b9       |
| 1449386_at   | 0.88499 | hydroxysteroid (17-beta) dehydrogenase 9                         | Hsd17b9       |
| 1449387_at   | 0.93055 | keratin 33A                                                      | Krt33a        |
| 1449388_at   | 1.05081 | thrombospondin 4                                                 | Thbs4         |
| 1449389_at   | 1.06358 | T-cell acute lymphocytic leukemia 1                              | Tal1          |
| 1449390_at   | 1.29292 | G patch domain containing 4                                      | Gpatc4        |
| 1449391_at   | 1.00370 | zinc finger protein 37                                           | Zfp37         |
| 1449392_at   | 0.78969 | hydroxysteroid (17-beta) dehydrogenase 1                         | Hsd17b1       |
| 1449393_at   | 1.09357 | SH2 domain protein 1A                                            | Sh2d1a        |
| 1449394_at   | 1.16746 | "solute carrier organic anion transporter family, member 1b2"    | Slco1b2       |
| 1449395_at   | 1.05740 | RIKEN cDNA 4921520G13 gene                                       | 4921520G13Rik |
| 1449396_at   | 0.92715 | "amine oxidase, copper containing 3"                             | Aoc3          |
| 1449397_at   | 0.92919 | homeo box B2                                                     | Hoxb2         |
| 1449398_at   | 1.05903 | ribosomal protein L3-like                                        | Rpl3l         |
| 1449399_a_at | 0.89544 | interleukin 1 beta                                               | Il1b          |
| 1449400_at   | 1.00877 | citrate synthase like                                            | Csl           |
| 1449401_at   | 1.00251 | "complement component 1, q subcomponent, C chain"                | C1qc          |
| 1449402_at   | 0.97901 | carbohydrate (N-acetylglucosamino) sulfotransferase 7            | Chst7         |
| 1449403_at   | 0.88536 | phosphodiesterase 9A                                             | Pde9a         |
| 1449404_at   | 0.70750 | "phosphatidylinositol-4-phosphate 5-kinase, type II, alpha"      | Pip5k2a       |
| 1449405_at   | 0.84027 | tensin 1                                                         | Tns1          |
| 1449406_at   | 0.90468 | cysteine and histidine rich 1                                    | Cyhr1         |
| 1449407_at   | 0.82958 | intraflagellar transport 81 homolog (Chlamydomonas)              | Ift81         |
| 1449408_at   | 0.94052 | junction adhesion molecule 2                                     | Jam2          |
| 1449409_at   | 1.24282 | "sulfotransferase family, cytosolic, 1C, member 2"               | Sult1c2       |
| 1449410_a_at | 1.19987 | growth arrest specific 5                                         | Gas5          |
| 1449411_at   | 0.98302 | Down syndrome cell adhesion molecule                             | Dscam         |
| 1449412_at   | 0.91569 | RIKEN cDNA 1810046J19 gene                                       | 1810046J19Rik |
| 1449413_at   | 1.03645 | "Mpv17 transgene, kidney disease mutant-like"                    | Mpv17l        |
| 1449414_at   | 1.27012 | zinc finger protein 53                                           | Zfp53         |
| 1449415_at   | 1.13654 | chromodomain helicase DNA binding protein 1-like                 | Chd1l         |
| 1449416_at   | 0.85131 | frizzled homolog 4 (Drosophila)                                  | Fzd4          |
| 1449417_at   | 0.94163 | ameloblastin                                                     | Ambn          |
| 1449418_s_at | 1.05694 | F-box only protein 36                                            | Fbxo36        |
| 1449419_at   | 0.80184 | dedicator of cytokinesis 8                                       | Dock8         |
| 1449420_at   | 0.92155 | "phosphodiesterase 1B, Ca <sup>2+</sup> -calmodulin dependent"   | Pde1b         |
| 1449421_a_at | 0.93945 | "potassium voltage-gated channel, Isk-related subfamily, gene 2" | Kcne2         |
| 1449422_at   | 0.91474 | cadherin 4                                                       | Cdh4          |
| 1449423_at   | 0.98751 | microtubule associated serine/threonine kinase 1                 | Mast1         |
| 1449424_at   | 0.93714 | pleckstrin 2                                                     | Plek2         |

1449425\_at 1.02595 wingless-related MMTV integration site 2 Wnt2  
 1449426\_a\_at 1.09170 annexin A10 Anxa10  
 1449427\_at 1.12790 RIKEN cDNA 1700016G05 gene 1700016G05Rik  
 1449428\_at 0.91684 claudin 18 Cldn18  
 1449429\_at 0.82561 FK506 binding protein 1b Fkbp1b  
 1449430\_a\_at 1.05032 trehalase (brush-border membrane glycoprotein) Treh  
 1449431\_at 1.01700 "transient receptor potential cation channel, subfamily C, member 6" Trpc6  
 1449432\_a\_at 0.89403 membrane metallo-endopeptidase-like 1 Mmell1  
 1449433\_at 0.98404 "purinergic receptor P2X, ligand-gated ion channel, 5" P2rx5  
 1449434\_at 1.06536 carbonic anhydrase 3 Car3  
 1449435\_at 0.88742 "UDP-Gal:betaGlcNAc beta 1,4-galactosyltransferase, polypeptide 3"  
 B4galt3  
 1449436\_s\_at 0.94326 "ubiquitin B /// ubiquitin pseudogene /// gene model 1821, (NCBI) /// similar to  
 polyubiquitin" Ubb /// LOC218963 /// Gm1821 /// LOC667759  
 1449437\_at 0.96341 "DNA segment, Chr 6, Wayne State University 163, expressed" D6Wsu163e  
 1449438\_at 0.98600 dolichol-phosphate (beta-D) mannosyltransferase 1 Dpm1  
 1449439\_at 0.88368 Kruppel-like factor 7 (ubiquitous) Klf7  
 1449440\_at 0.92253 lipin 3 Lpin3  
 1449441\_a\_at 0.89282 WW domain binding protein 1 Wbp1  
 1449442\_at 0.96839 peroxisomal biogenesis factor 11a Pex11a  
 1449443\_at 0.80159 "2,4-dienoyl CoA reductase 1, mitochondrial" Decr1  
 1449444\_a\_at 0.94297 microfibrillar-associated protein 1 Mfap1  
 1449445\_x\_at 1.02849 microfibrillar-associated protein 1 Mfap1  
 1449446\_at 0.91473 coiled-coil domain containing 59 Ccdc59  
 1449447\_at 0.91689 cystatin 10 (chondrocytes) Cst10  
 1449448\_at 0.98555 "mediator of RNA polymerase II transcription, subunit 9 homolog (yeast)"  
 Med9  
 1449449\_at 0.95203 prostaglandin E synthase Ptges  
 1449450\_at 1.08148 prostaglandin E synthase Ptges  
 1449451\_at 0.91782 "serine (or cysteine) peptidase inhibitor, clade B (ovalbumin), member 11"  
 Serpinb11  
 1449452\_a\_at 0.97880 glycoprotein 2 (zymogen granule membrane) Gp2  
 1449453\_at 1.12728 bone marrow stromal cell antigen 1 Bst1  
 1449454\_at 1.28603 bone marrow stromal cell antigen 1 Bst1  
 1449455\_at 1.21610 hemopoietic cell kinase Hck  
 1449456\_a\_at 0.96742 "chymase 1, mast cell" Cma1  
 1449457\_at 0.86868 acyl-CoA thioesterase 12 Acot12  
 1449458\_at 1.12280 forkhead box I1 Foxo1  
 1449459\_s\_at 1.01565 ankyrin repeat and SOCS box-containing protein 13 Asb13  
 1449460\_at 1.06837 ankyrin repeat and SOCS box-containing protein 13 Asb13  
 1449461\_at 0.93541 "retinol binding protein 7, cellular" Rbp7  
 1449462\_at 1.06267 RIKEN cDNA 3110049J23 gene 3110049J23Rik  
 1449463\_at 0.92206 kallikrein 1-related peptidase b8 Klk1b8

1449464\_at 0.87211 "potassium voltage-gated channel, subfamily Q, member 1" Kcnq1  
1449465\_at 0.99618 reelin Reln  
1449466\_at 0.91476 "C-type lectin domain family 3, member b" Clec3b  
1449467\_at 1.01635 spermiogenesis specific transcript on the Y 1 /// similar to Y-linked testis-specific protein /// similar to Y-linked testis-specific protein /// similar to Y-linked testis-specific protein Ssty1 /// LOC665276 /// LOC665301 /// LOC665687  
1449468\_at 0.91397 "ST6 (alpha-N-acetyl-neuraminy-2,3-beta-galactosyl-1,3)-N-acetylgalactosaminide alpha-2,6-sialyltransferase 5" St6galnac5  
1449469\_at 1.09844 polycystic kidney disease 2-like 2 Pkd2l2  
1449470\_at 1.02076 distal-less homeobox 1 Dlx1  
1449471\_at 0.80208 "potassium large conductance calcium-activated channel, subfamily M, beta member 4" Kcnmb4  
1449472\_at 0.97734 G-protein coupled receptor 12 Gpr12  
1449473\_s\_at 1.05350 CD40 antigen Cd40  
1449474\_a\_at 0.93399 nasal embryonic LHRH factor Nelf  
1449475\_at 0.96141 "ATPase, H+/K+ transporting, nongastric, alpha polypeptide" Atp12a  
1449476\_at 1.02454 renal tumor antigen Rage  
1449477\_s\_at 0.91372 "solute carrier family 2 (facilitated glucose transporter), member 10" Slc2a10  
1449478\_at 0.96702 matrix metalloproteinase 7 Mmp7  
1449479\_at 0.99835 "cytochrome P450, family 2, subfamily b, polypeptide 13" Cyp2b13  
1449480\_at 1.12377 Sin3-associated polypeptide 18 Sap18  
1449481\_at 1.09805 "solute carrier family 25 (mitochondrial carrier, adenine nucleotide translocator), member 13" Slc25a13  
1449482\_at 0.96837 "histone 3, H2ba" Hist3h2ba  
1449483\_at 1.09656 "polymerase (DNA directed), kappa" Polk  
1449484\_at 1.03134 stanniocalcin 2 Stc2  
1449485\_at 0.98466 receptor (TNFRSF)-interacting serine-threonine kinase 1 Ripk1  
1449486\_at 1.08982 carboxylesterase 1 Ces1  
1449487\_at 0.95778 coiled-coil domain containing 70 Ccdc70  
1449488\_at 1.03053 paired-like homeodomain transcription factor 1 Pitx1  
1449489\_at 0.95212 testis-specific serine kinase 2 Tssk2  
1449490\_at 0.96499 methyl-CpG binding domain protein 4 Mbd4  
1449491\_at 0.84962 "caspase recruitment domain family, member 10" Card10  
1449492\_a\_at 1.10408 leukocyte cell-derived chemotaxin 2 Lect2  
1449493\_at 0.90205 insulin-like 5 Ins5  
1449494\_at 0.98819 "RAB3C, member RAS oncogene family" Rab3c  
1449495\_at 0.96209 regenerating islet-derived 3 alpha Reg3a  
1449496\_at 1.02561 RIKEN cDNA 2010109I03 gene 2010109I03Rik  
1449497\_at 0.96552 interleukin 12b Il12b  
1449498\_at 1.05509 macrophage receptor with collagenous structure Marco  
1449499\_at 0.88596 homeo box A7 Hoxa7  
1449500\_at 0.98374 "serine (or cysteine) peptidase inhibitor, clade B, member 7" Serpinb7  
1449501\_a\_at 1.04240 granzyme M (lymphocyte met-ase 1) Gzmm

1449502\_at 0.87184 deleted in azoospermia-like Dazl  
1449503\_at 0.97111 karyopherin (importin) alpha 1 Kpna1  
1449504\_at 0.93791 karyopherin (importin) alpha 1 Kpna1  
1449505\_at 1.08782 karyopherin (importin) alpha 1 Kpna1  
1449506\_a\_at 1.00012 eukaryotic translation elongation factor 1 delta (guanine nucleotide exchange protein) Eef1d  
1449507\_a\_at 1.20581 "CD47 antigen (Rh-related antigen, integrin-associated signal transducer)" Cd47  
1449508\_at 1.05916 "interleukin 27 receptor, alpha" Il27ra  
1449509\_at 0.76451 small EDRK-rich factor 1 Serf1  
1449510\_at 0.89064 zinc finger protein 467 Zfp467  
1449511\_a\_at 0.89454 single stranded DNA binding protein 4 Ssbp4  
1449512\_a\_at 0.93815 zinc finger protein X-linked Zfx  
1449513\_at 1.03903 a disintegrin and metallopeptidase domain 24 (testase 1) Adam24  
1449514\_at 0.87105 G protein-coupled receptor kinase 5 Gprk5  
1449515\_at 1.12493 zinc finger protein 292 Zfp292  
1449516\_a\_at 0.84692 regulator of G-protein signaling 3 Rgs3  
1449517\_at 0.92539 glutaminyl-peptide cyclotransferase-like Qpctl  
1449518\_at 1.00565 glutaminyl-peptide cyclotransferase-like Qpctl  
1449519\_at 1.10754 growth arrest and DNA-damage-inducible 45 alpha Gadd45a  
1449520\_at 0.78748 tetratricopeptide repeat domain 28 Ttc28  
1449521\_at 0.99986 CD93 antigen Cd93  
1449522\_at 1.05761 unc-5 homolog C (C. elegans) Unc5c  
1449523\_at 0.96848 B-cell CLL/lymphoma 7C Bcl7c  
1449524\_at 0.91695 ectodysplasin-A Eda  
1449525\_at 1.05121 flavin containing monooxygenase 3 Fmo3  
1449526\_a\_at 0.95198 glycerophosphodiester phosphodiesterase domain containing 3 Gdpd3  
1449527\_at 0.93913 protocadherin beta 7 Pcdhb7  
1449528\_at 0.91832 c-fos induced growth factor Figf  
1449529\_s\_at 1.00755 prolactin-like protein E Prlpe  
1449530\_at 0.76100 trichorhinophalangeal syndrome I (human) Trps1  
1449531\_at 1.02714 leprecan-like 2 Leprel2  
1449532\_at 0.96619 "cholinergic receptor, nicotinic, gamma polypeptide" Chrng  
1449533\_at 1.02547 transmembrane protein 100 Tmem100  
1449534\_at 0.82224 synaptonemal complex protein 3 Sycp3  
1449535\_at 0.95864 zinc and ring finger 4 Znrf4  
1449536\_at 0.68862 "potassium intermediate/small conductance calcium-activated channel, subfamily N, member 1" Kcnn1  
1449537\_at 0.87593 mutS homolog 5 (E. coli) Msh5  
1449538\_a\_at 1.14782 "glucosaminyl (N-acetyl) transferase 1, core 2 /// similar to glucosaminyl (N-acetyl) transferase 1, core 2" Gcnt1 /// LOC635918  
1449539\_at 0.97921 "membrane-spanning 4-domains, subfamily A, member 11" Ms4a11  
1449540\_at 0.91720 reproductive homeobox 9 Rhox9

1449541\_x\_at 1.03784 RIKEN cDNA 1700010I14 gene 1700010I14Rik  
1449542\_at 0.94385 pre B-cell leukemia transcription factor 1 Pbx1  
1449543\_at 1.20893 zinc finger protein 371 Zfp371  
1449544\_a\_at 0.52810 "potassium voltage-gated channel, subfamily H (eag-related), member 2"  
Kcnh2  
1449545\_at 0.98293 fibroblast growth factor 18 Fgf18  
1449546\_a\_at 0.98444 zinc finger protein 617 Zfp617  
1449547\_at 1.05115 ankyrin repeat and SOCS box-containing protein 14 Asb14  
1449548\_at 0.90230 ephrin B2 Efnb2  
1449549\_at 0.80802 ephrin B2 Efnb2  
1449550\_at 1.02204 myosin IC Myo1c  
1449551\_at 1.11075 myosin IC Myo1c  
1449552\_at 1.10765 zinc finger RNA binding protein Zfr  
1449553\_at 1.00342 RIKEN cDNA 2610200G18 gene 2610200G18Rik  
1449554\_at 0.92971 "transducin-like enhancer of split 3, homolog of Drosophila E(spl)" Tle3  
1449555\_a\_at 1.05947 fetuin beta Fetub  
1449556\_at 1.74861 "histocompatibility 2, T region locus 23 /// RIKEN cDNA C920025E04 gene ///  
similar to H-2 class I histocompatibility antigen, D-37 alpha chain precursor /// similar to H-2 class I  
histocompatibility antigen, D-37 alpha chain precursor /// similar to H-2 class I histocompatibility  
antigen, D-37 alpha chain precursor" H2-T23 /// C920025E04Rik /// LOC667803 /// LOC672711 ///  
LOC674134  
1449557\_at 1.02226 RIKEN cDNA 1600012F09 gene /// hypothetical LOC624446  
1600012F09Rik /// LOC624446  
1449558\_at 0.88479 coagulation factor VIII F8  
1449559\_at 1.04665 "homeo box, msh-like 2" Msx2  
1449560\_at 0.97845 RIKEN cDNA 2310043L02 gene 2310043L02Rik  
1449561\_at 1.11173 RIKEN cDNA 4921504I05 gene 4921504I05Rik  
1449562\_at 0.96985 RIKEN cDNA 1700001G17 gene 1700001G17Rik  
1449563\_at 0.96372 contactin 1 Cntn1  
1449564\_at 1.07254 tryptase gamma 1 Tpsg1  
1449565\_at 1.03024 "cytochrome P450, family 2, subfamily g, polypeptide 1" Cyp2g1  
1449566\_at 1.07342 "NK2 transcription factor related, locus 5 (Drosophila)" Nkx2-5  
1449567\_at 1.03864 transketolase-like 1 Tk1l  
1449568\_at 0.89069 klotho beta Klb  
1449569\_at 1.08073 thrombopoietin Thpo  
1449570\_at 0.96217 killer cell lectin-like receptor subfamily B member 1C Klr1c  
1449571\_at 0.96422 thyrotropin releasing hormone receptor Trhr  
1449572\_at 0.91200 thyrotropin releasing hormone receptor Trhr  
1449573\_at 1.04641 alpha-kinase 3 Alpk3  
1449574\_a\_at 1.00079 cell division cycle 42 homolog (S. cerevisiae) Cdc42  
1449575\_a\_at 0.94803 "glutathione S-transferase, pi 1" Gstp1  
1449576\_at 0.98226 "eukaryotic translation initiation factor 1A, Y-linked" Eif1ay  
1449577\_x\_at 0.90864 "tropomyosin 2, beta" Tpm2



1449578\_at 1.11608 suppressor of Ty 16 homolog (*S. cerevisiae*) Supt16h  
1449579\_at 0.72819 Sh3 domain YSC-like 1 Sh3yl1  
1449580\_s\_at 0.91709 "histocompatibility 2, class II, locus Mb1 /// histocompatibility 2, class II, locus Mb2" H2-DMb1 /// H2-DMb2  
1449581\_at 0.89610 EMI domain containing 1 Emid1  
1449582\_at 0.90812 caudal type homeo box 1 Cdx1  
1449583\_at 0.68497 protocadherin beta 20 Pcdhb20  
1449584\_at 1.00585 "diacylglycerol kinase, gamma" Dgkg  
1449585\_at 0.96806 interleukin 1 receptor accessory protein Il1rap  
1449586\_at 0.94453 plakophilin 1 Pkp1  
1449587\_a\_at 1.10653 "mucin 10, submandibular gland salivary mucin" Muc10  
1449588\_at 1.07005 "ATP-binding cassette, sub-family A (ABC1), member 4" Abca4  
1449589\_x\_at 0.95487 RIKEN cDNA 2610020O08 gene 2610020O08Rik  
1449590\_a\_at 1.03832 muscle and microspikes RAS Mras  
1449591\_at 1.79757 "caspase 4, apoptosis-related cysteine peptidase" Casp4  
1449592\_at 1.01036 transcription factor 15 Tcf15  
1449593\_at 1.05671 --- ---  
1449594\_at 1.09832 "ATP-binding cassette, sub-family B (MDR/TAP), member 1B" Abcb1b  
1449595\_at 1.02458 expressed sequence C79490 C79490  
1449596\_at 0.89740 expressed sequence C78142 C78142  
1449597\_at 1.06082 similar to odorant binding protein Ia LOC236874  
1449598\_at 0.99063 Density-regulated protein Denr  
1449599\_at 0.93344 --- ---  
1449600\_at 0.98820 "gene model 1683, (NCBI)" Gm1683  
1449601\_x\_at 0.94549 Transcribed locus ---  
1449602\_at 0.99691 Kelch-like 5 (*Drosophila*) Khlh5  
1449603\_at 1.11351 expressed sequence AI594671 AI594671  
1449604\_at 0.93218 "acid phosphatase 1, soluble /// similar to acid phosphatase 1, soluble /// similar to acid phosphatase 1, soluble /// similar to acid phosphatase 1 isoform b /// similar to acid phosphatase 1, soluble /// similar to acid phosphatase 1, soluble /// similar to acid phosphatase 1 isoform b /// similar to acid phosphatase 1 isoform b /// similar to acid phosphatase 1 isoform b" Acp1 /// LOC619997 /// LOC631286 /// LOC635312 /// LOC665717 /// LOC666063 /// LOC668486 /// LOC670469 /// LOC676625  
1449605\_at 0.94858 Transcribed locus ---  
1449606\_at 0.80884 --- ---  
1449607\_at 0.98588 RIKEN cDNA A230070E04 gene A230070E04Rik  
1449608\_a\_at 0.90870 --- ---  
1449609\_at 0.97650 Transcribed locus ---  
1449610\_at 0.90515 E1A binding protein p400 Ep400  
1449611\_at 0.86676 CD82 antigen Cd82  
1449612\_x\_at 0.93964 M-phase phosphoprotein 1 Mphosph1  
1449613\_at 0.98616 --- ---  
1449614\_s\_at 1.02024 expressed sequence AI314976 /// similar to Protein C6orf130 homolog

## AI314976 /// LOC672876

1449615\_s\_at 0.98745 high density lipoprotein (HDL) binding protein Hdlbp  
 1449616\_s\_at 0.94371 "golgi autoantigen, golgin subfamily a, 3" Golga3  
 1449617\_at 0.93262 RIKEN cDNA 2900092E17 gene 2900092E17Rik  
 1449618\_s\_at 0.96727 RIKEN cDNA 2900092E17 gene 2900092E17Rik  
 1449619\_s\_at 0.89036 Rho GTPase activating protein 9 Arhgap9  
 1449620\_s\_at 1.06839 "DNA segment, Chr 16, Wayne State University 65, expressed" D16Wsu65e  
 1449621\_s\_at 0.89168 "thrombospondin, type I, domain 1" Thsd1  
 1449622\_s\_at 0.96092 "ATPase, H+ transporting, lysosomal accessory protein 1" Atp6ap1  
 1449623\_at 1.02178 thioredoxin reductase 3 Txnrd3  
 1449624\_at 1.00053 "gene model 118, (NCBI)" Gm118  
 1449625\_at 1.06224 "Transcribed locus, weakly similar to NP\_570953.1 CAMP [Mus musculus]" ---  
 1449626\_s\_at 0.93615 acyl-Coenzyme A binding domain containing 4 Acbd4  
 1449627\_at 0.98016 Oxysterol binding protein-like 6 Osbpl6  
 1449628\_s\_at 0.89854 START domain containing 7 Stard7  
 1449629\_s\_at 1.00489 Small nuclear ribonucleoprotein D3 Snrpd3  
 1449630\_s\_at 1.13001 MAP/microtubule affinity-regulating kinase 1 Mark1  
 1449631\_at 1.03532 "Enolase 3, beta muscle" Eno3  
 1449632\_s\_at 0.80389 FK506 binding protein 10 Fkbp10  
 1449633\_s\_at 0.95909 "5'-nucleotidase, cytosolic III-like" Nt5c3l  
 1449634\_a\_at 0.91280 ankyrin repeat and sterile alpha motif domain containing 1B /// similar to  
 AIDA-1b Anks1b /// LOC544718  
 1449635\_at 1.00606 PRP19/PSO4 pre-mRNA processing factor 19 homolog (S. cerevisiae)  
 Prpf19  
 1449637\_at 1.01342 cadherin 4 Cdh4  
 1449638\_at 1.00690 --- ---  
 1449639\_at 1.00040 RIKEN cDNA 0610040J01 gene 0610040J01Rik  
 1449640\_at 0.97612 toll-like receptor 7 Tlr7  
 1449641\_at 1.08086 --- ---  
 1449642\_at 0.84229 Phosphoglycerate dehydrogenase like 1 Phgdh1  
 1449643\_s\_at 1.04674 basic transcription factor 3 Btf3  
 1449644\_at 1.05107 similar to T-cell receptor alpha chain V region CTL-F3 precursor  
 LOC236118  
 1449645\_s\_at 1.04414 chaperonin subunit 3 (gamma) Cct3  
 1449646\_s\_at 0.86079 tigger transposable element derived 5 Tigd5  
 1449647\_at 1.04988 Transcribed locus ---  
 1449648\_s\_at 1.09682 RNA polymerase 1-1 Rpo1-1  
 1449649\_at 0.97498 "ATPase, H+ transporting, lysosomal V1 subunit B2" Atp6v1b2  
 1449650\_at 1.01344 Ethanolamine kinase 1 Etnk1  
 1449651\_x\_at 1.02278 --- ---  
 1449652\_at 0.96432 NudC domain containing 1 Nudcd1  
 1449653\_at 1.67247 Transcribed locus ---  
 1449654\_s\_at 0.95168 expressed sequence C77545 C77545

1449655\_a\_at 0.96704 CDNA clone IMAGE:5690974 ---  
 1449656\_at 1.05733 RIKEN cDNA D930048N14 gene D930048N14Rik  
 1449657\_at 0.96038 "similar to proteasome (prosome, macropain) subunit, beta type 7"  
 MGC107702  
 1449658\_at 0.90844 expressed sequence AA536748 AA536748  
 1449659\_s\_at 1.08724 M-phase phosphoprotein 9 Mphosph9  
 1449660\_s\_at 1.05754 "coronin, actin binding protein 1C" Coro1c  
 1449661\_at 0.78859 Suppressor of zeste 12 homolog (Drosophila) Suz12  
 1449662\_at 1.03711 Receptor accessory protein 1 Reep1  
 1449663\_at 0.98746 --- ---  
 1449664\_s\_at 0.96078 ring finger protein 20 Rnf20  
 1449665\_at 0.94391 RIKEN cDNA 4833422M21 gene 4833422M21Rik  
 1449666\_at 0.97287 Attractin like 1 Atrnl1  
 1449667\_at 0.95128 Similar to Zinc finger protein 124 (HZF-16) LOC626391  
 1449668\_s\_at 1.06539 RIKEN cDNA A730024A03 gene A730024A03Rik  
 1449669\_at 0.98375 RAB interacting factor Rabif  
 1449670\_x\_at 1.03132 G protein-coupled receptor 137B Gpr137b  
 1449671\_at 1.06021 --- ---  
 1449672\_s\_at 0.90618 "Tu translation elongation factor, mitochondrial /// similar to Tu translation  
 elongation factor, mitochondrial" Tufm /// LOC669832  
 1449673\_s\_at 0.95953 --- ---  
 1449674\_s\_at 1.07541 programmed cell death 6 interacting protein Pdcd6ip  
 1449675\_at 0.96834 "cyclin B1, related sequence 1 /// similar to G2/mitotic-specific cyclin B1 ///  
 cyclin B1 /// similar to G2/mitotic-specific cyclin-B1 /// similar to G2/mitotic-specific cyclin-B1 ///  
 similar to G2/mitotic-specific cyclin-B1" Ccnb1-rs1 /// LOC231869 /// Ccnb1 /// LOC434175 ///  
 LOC545676 /// LOC672788  
 1449676\_at 0.76280 "RAB2, member RAS oncogene family" Rab2  
 1449677\_s\_at 0.92332 transmembrane protein 38B Tmem38b  
 1449678\_at 0.80983 --- ---  
 1449679\_s\_at 0.86427 syntaxin 5A Stx5a  
 1449680\_at 1.00068 expressed sequence C80678 C80678  
 1449681\_at 0.85540 Hepatoma-derived growth factor Hdgf  
 1449682\_s\_at 1.08494 "tubulin, beta 2b" Tubb2b  
 1449683\_x\_at 0.92822 "tubulin, beta 2b" Tubb2b  
 1449684\_at 0.92289 "3-oxoacyl-ACP synthase, mitochondrial" Oxsm  
 1449685\_s\_at 1.02343 "3-oxoacyl-ACP synthase, mitochondrial" Oxsm  
 1449686\_s\_at 0.92912 "sterol carrier protein 2, liver" Scp2  
 1449687\_at 0.95731 "DNA segment, Chr 10, ERATO Doi 610, expressed" D10Ertd610e  
 1449688\_at 0.86053 "DNA segment, Chr 10, ERATO Doi 610, expressed" D10Ertd610e  
 1449689\_at 0.98000 expressed sequence C81600 C81600  
 1449690\_x\_at 0.91166 --- ---  
 1449691\_at 0.81206 Zinc finger protein 644 Zfp644  
 1449692\_at 0.88144 "protein kinase C, zeta" Prkcz

1449693\_at 1.09393 Mitogen activated protein kinase kinase kinase 7 Map3k7  
1449694\_s\_at 0.96946 COMM domain containing 5 Commd5  
1449695\_at 0.96540 RIKEN cDNA A830082K12 gene A830082K12Rik  
1449696\_at 1.02460 Aryl hydrocarbon receptor nuclear translocator Arnt  
1449697\_s\_at 0.93677 mitofusin 1 Mfn1  
1449698\_at 0.85701 RIKEN cDNA C330027C09 gene C330027C09Rik  
1449699\_s\_at 0.95734 RIKEN cDNA C330027C09 gene C330027C09Rik  
1449700\_at 0.91813 Immunoglobulin (CD79A) binding protein 1 Igbp1  
1449701\_at 1.13422 "DNA segment, Chr 6, ERATO Doi 109, expressed" D6Ertd109e  
1449702\_at 1.05883 "zinc finger, AN1-type domain 2A" Zfand2a  
1449703\_at 0.83195 "Zinc finger, AN1-type domain 2A" Zfand2a  
1449704\_at 1.08478 expressed sequence C80171 C80171  
1449705\_x\_at 1.02025 minichromosome maintenance deficient 3 (*S. cerevisiae*) /// similar to DNA replication licensing factor MCM3 (DNA polymerase alpha holoenzyme-associated protein P1) (P1-MCM3) Mcm3 /// LOC671904  
1449706\_s\_at 0.96829 "nuclear receptor subfamily 5, group A, member 2" Nr5a2  
1449707\_at 0.92091 "nuclear receptor subfamily 5, group A, member 2" Nr5a2  
1449708\_s\_at 0.94476 checkpoint kinase 1 homolog (*S. pombe*) Chek1  
1449709\_s\_at 1.02984 arginine-tRNA-protein transferase 1 Ate1  
1449710\_s\_at 0.92239 "ATP synthase, H<sup>+</sup> transporting, mitochondrial F1 complex, alpha subunit, isoform 1" Atp5a1  
1449711\_at 0.92758 "VATPase, H<sup>+</sup> transporting, lysosomal V1 subunit E1" Atp6v1e1  
1449712\_s\_at 0.96511 "VATPase, H<sup>+</sup> transporting, lysosomal V1 subunit E1" Atp6v1e1  
1449713\_at 1.00546 Chromobox homolog 7 Cbx7  
1449714\_at 0.88789 RIKEN cDNA 5730472N09 gene 5730472N09Rik  
1449715\_at 0.98368 --- ---  
1449716\_s\_at 1.08744 "nardilysin, N-arginine dibasic convertase, NRD convertase 1" Nrd1  
1449717\_at 0.87801 --- ---  
1449718\_s\_at 0.88725 RIKEN cDNA 4930453N24 gene 4930453N24Rik  
1449719\_at 0.91057 RIKEN cDNA 4930453N24 gene 4930453N24Rik  
1449720\_at 1.02202 --- ---  
1449721\_at 1.05650 "PREDICTED: Mus musculus hypothetical protein LOC628408 (LOC628408), mRNA" ---  
1449722\_at 1.01235 Transcribed locus ---  
1449723\_at 1.04363 "serine (or cysteine) peptidase inhibitor, clade B, member 6e" Serpinb6e  
1449724\_s\_at 1.07385 "DNA segment, Chr 8, ERATO Doi 738, expressed" D8Ertd738e  
1449725\_at 1.02959 Glutamine fructose-6-phosphate transaminase 1 Gfpt1  
1449726\_at 0.93553 thioredoxin-like 2 /// similar to thioredoxin-like 2 Txnl2 /// LOC620016  
1449727\_x\_at 0.97463 --- ---  
1449728\_at 1.00381 Transcribed locus ---  
1449729\_at 1.09928 fibroblast growth factor 4 Fgf4  
1449730\_s\_at 1.00386 frizzled homolog 3 (*Drosophila*) Fzd3  
1449731\_s\_at 1.48068 "nuclear factor of kappa light chain gene enhancer in B-cells inhibitor, alpha"

## Nfkbia

1449732\_at 0.88121 zinc finger proliferation 1 Zipr1  
1449733\_s\_at 0.91925 seven in absentia 1A Siah1a  
1449734\_s\_at 0.82311 Bardet-Biedl syndrome 4 homolog (human) Bbs4  
1449735\_at 0.78343 --- ---  
1449736\_at 0.96484 "Phosphatidylinositol-4-phosphate 5-kinase, type II, alpha" Pip5k2a  
1449737\_at 1.03266 Phosphofurin acidic cluster sorting protein 1 Pacs1  
1449738\_s\_at 0.99598 Exosome component 8 Exosc8  
1449739\_at 0.89015 Phosphatidylserine synthase 1 Ptdss1  
1449740\_s\_at 0.88064 desmoglein 2 Dsg2  
1449741\_at 0.90078 Desmoglein 2 Dsg2  
1449742\_at 0.96846 expressed sequence AA522020 AA522020  
1449743\_a\_at 1.01382 CDNA sequence BC021438 BC021438  
1449744\_at 1.05344 "Solute carrier family 19 (sodium/hydrogen exchanger), member 1" Slc19a1  
1449745\_at 1.04685 Transcribed locus ---  
1449746\_s\_at 1.15442 GLI pathogenesis-related 1 (glioma) Glipr1  
1449747\_at 1.03822 "Bin3, bicoid-interacting 3, homolog (Drosophila)" Bcdin3  
1449748\_at 0.97106 expressed sequence AA517023 AA517023  
1449749\_s\_at 1.06343 "transcription factor B1, mitochondrial" Tfb1m  
1449750\_at 0.98909 expressed sequence AA407331 AA407331  
1449751\_at 0.92563 --- ---  
1449752\_at 1.01160 SplA/ryanodine receptor domain and SOCS box containing 1 Spsb1  
1449753\_at 0.89747 myosin IE Myo1e  
1449754\_at 0.99779 expressed sequence AA511261 AA511261  
1449755\_at 1.43454 "DNA segment, Chr 7, ERATO Doi 183, expressed" D7Ertd183e  
1449756\_at 1.07009 "DnaJ (Hsp40) homolog, subfamily C, member 17" Dnajc17  
1449757\_x\_at 0.91921 "deoxynucleotidyltransferase, terminal" Dntt  
1449758\_at 0.87161 --- ---  
1449759\_at 1.07004 "DNA segment, Chr 11, ERATO Doi 326, expressed" D11Ertd326e  
1449760\_at 0.99411 Transcribed locus ---  
1449761\_at 0.98178 expressed sequence AA589418 AA589418  
1449762\_at 1.04571 Transcribed locus ---  
1449763\_at 1.07479 Doublesex and mab-3 related transcription factor 3 Dmrt3  
1449764\_x\_at 0.96625 "synovial sarcoma, X breakpoint 2 interacting protein" Ssx2ip  
1449765\_at 0.95614 expressed sequence C76628 C76628  
1449766\_at 0.96148 synaptotagmin VI Syt6  
1449767\_x\_at 0.83181 synaptotagmin VI Syt6  
1449768\_at 0.96594 --- ---  
1449769\_at 0.97438 --- ---  
1449770\_x\_at 1.03359 "DNA segment, Chr 16, Brigham & Women's Genetics 1494 expressed"  
D16Bwg1494e  
1449771\_at 0.91482 --- ---  
1449772\_at 0.87024 "TBC1 domain family, member 14" Tbc1d14

1449773\_s\_at 1.11048 growth arrest and DNA-damage-inducible 45 beta Gadd45b  
1449774\_at 1.00728 --- ---  
1449775\_x\_at 0.96329 "solute carrier family 35, member A4 /// similar to solute carrier family 35, member A4" Slc35a4 /// LOC545750  
1449776\_at 1.08849 --- ---  
1449777\_at 0.93067 Dihydrouridine synthase 4-like (S. cerevisiae) Dus4l  
1449778\_at 1.03720 --- ---  
1449779\_at 1.04076 --- ---  
1449780\_at 0.92372 --- ---  
1449781\_at 0.91221 --- ---  
1449782\_at 1.03047 expressed sequence AA517650 AA517650  
1449783\_at 0.97605 --- ---  
1449784\_at 1.06195 --- ---  
1449785\_at 1.04806 expressed sequence AA414993 AA414993  
1449786\_at 0.95441 "zinc finger, DHHC domain containing 7" Zdhhc7  
1449787\_at 1.15336 --- ---  
1449788\_at 0.97916 --- ---  
1449789\_x\_at 0.93799 "lymphocyte antigen 6 complex, locus G6C" Ly6g6c  
1449790\_at 0.93224 --- ---  
1449791\_x\_at 0.90606 RIKEN cDNA 9130023D20 gene 9130023D20Rik  
1449792\_at 0.89780 --- ---  
1449793\_at 0.93211 --- ---  
1449794\_x\_at 0.94730 Cathepsin F Ctsf  
1449795\_at 1.01810 "DNA segment, Chr 2, ERATO Doi 63, expressed" D2Ertd63e  
1449796\_at 0.98465 Peripherin 1 Prph1  
1449797\_x\_at 0.87642 Peripherin 1 Prph1  
1449798\_at 0.98413 Transcribed locus ---  
1449799\_s\_at 1.09558 plakophilin 2 Pkp2  
1449800\_x\_at 0.97623 PHD finger protein 7 Phf7  
1449801\_at 1.09474 --- ---  
1449802\_x\_at 0.94895 "3 days neonate thymus cDNA, RIKEN full-length enriched library, clone: A630030O14 product:unclassifiable, full insert sequence" ---  
1449803\_x\_at 0.97739 "transporter 1, ATP-binding cassette, sub-family B (MDR/TAP)" Tap1  
1449804\_at 0.93013 phenylethanolamine-N-methyltransferase Pnmt  
1449805\_at 1.01309 "Protease, serine, 29" Prss29  
1449806\_at 0.84630 Transcribed locus ---  
1449807\_x\_at 1.09032 --- ---  
1449808\_at 1.06404 Transcribed locus ---  
1449813\_at 0.77502 zinc finger protein 30 Zfp30  
1449814\_at 0.96559 frequently rearranged in advanced T-cell lymphomas Frat1  
1449815\_a\_at 0.82260 single-stranded DNA binding protein 2 Ssbp2  
1449816\_at 0.84651 "sulfotransferase family 5A, member 1" Sult5a1  
1449817\_at 0.94664 "ATP-binding cassette, sub-family B (MDR/TAP), member 11" Abcb11

1449818\_at 0.78606 "ATP-binding cassette, sub-family B (MDR/TAP), member 4" Abcb4  
1449819\_at 0.98840 disrupted meiotic cDNA 1 homolog Dmc1h  
1449820\_at 1.00187 cortistatin Cort  
1449821\_a\_at 1.07222 RIKEN cDNA 0610016J10 gene /// hypothetical LOC619602  
0610016J10Rik /// LOC619602  
1449822\_at 1.13658 atonal homolog 1 (Drosophila) Atoh1  
1449823\_at 0.95872 dachshund 2 (Drosophila) Dach2  
1449824\_at 0.98977 "proteoglycan 4 (megakaryocyte stimulating factor, articular superficial zone  
protein)" Prg4  
1449825\_at 1.11280 actin-related protein T1 Actrt1  
1449826\_a\_at 1.07388 fibroblast growth factor 2 Fgf2  
1449827\_at 0.95038 aggrecan 1 Agc1  
1449828\_at 1.01762 prostaglandin F receptor Ptgfr  
1449829\_at 0.95747 integrin beta 2-like Itgb2l  
1449830\_at 1.02297 prolactin-like protein J Prlpj  
1449831\_at 1.00261 Tctex1 domain containing 1 Tctex1d1  
1449832\_at 0.85633 RIKEN cDNA 1700091H14 gene 1700091H14Rik  
1449833\_at 0.92531 small proline-rich protein 2F Sprr2f  
1449834\_at 0.87828 "PDZ domain containing, X chromosome" Pdzx  
1449835\_at 0.97004 programmed cell death 1 Pcd1  
1449836\_x\_at 1.05574 Bcl2-interacting killer Bik  
1449837\_at 0.96210 sperm equatorial segment protein 1 Spesp1  
1449838\_at 0.93591 cysteine-rich secretory protein 3 Crisp3  
1449839\_at 1.03410 --- ---  
1449840\_at 0.96292 "syntrophin, basic 2" Sntb2  
1449841\_at 1.05365 kinesin family member 3A Kif3a  
1449842\_at 0.93594 RIKEN cDNA 1810059G22 gene 1810059G22Rik  
1449843\_at 1.03399 "ST8 alpha-N-acetyl-neuraminide alpha-2,8-sialyltransferase 2" St8sia2  
1449844\_at 0.99356 "solute carrier organic anion transporter family, member 1a1" Slco1a1  
1449845\_a\_at 0.88109 Eph receptor B4 Ephb4  
1449846\_at 0.93566 "eosinophil-associated, ribonuclease A family, member 2" Ear2  
1449847\_a\_at 1.06998 "procollagen, type IV, alpha 3 (Goodpasture antigen) binding protein"  
Col4a3bp  
1449848\_at 1.00560 "guanine nucleotide binding protein, alpha 14" Gna14  
1449849\_a\_at 1.00142 F-box and leucine-rich repeat protein 6 Fbxl6  
1449850\_at 0.93107 "signal peptide, CUB domain, EGF-like 1" Scube1  
1449851\_at 0.89902 period homolog 1 (Drosophila) Per1  
1449852\_a\_at 1.07750 EH-domain containing 4 Ehd4  
1449853\_at 0.99090 sideroflexin 2 /// similar to Sideroflexin-2 Sfxn2 /// LOC677143  
1449854\_at 0.84493 "nuclear receptor subfamily 0, group B, member 2" Nr0b2  
1449855\_s\_at 1.11494 ubiquitin carboxyl-terminal esterase L3 (ubiquitin thiolesterase) /// ubiquitin  
carboxyl-terminal esterase L4 Uchl3 /// Uchl4  
1449856\_at 1.02652 regulator of G-protein signaling 18 Rgs18

1449857\_at 0.92101 RIKEN cDNA 1200011I18 gene 1200011I18Rik  
1449858\_at 0.94774 CD86 antigen Cd86  
1449859\_at 0.85457 golgi transport 1 homolog B (*S. cerevisiae*) Golt1b  
1449860\_at 0.99501 "HIG1 domain family, member 1B" Higd1b  
1449861\_at 1.05992 NIMA (never in mitosis gene a)-related expressed kinase 4 Nek4  
1449862\_a\_at 1.10813 phosphatidylinositol 4-kinase type 2 beta Pi4k2b  
1449863\_a\_at 1.05253 distal-less homeobox 5 Dlx5  
1449864\_at 0.85533 interleukin 4 Il4  
1449865\_at 0.68454 "sema domain, immunoglobulin domain (Ig), short basic domain, secreted, (semaphorin) 3A" Sema3a  
1449866\_at 0.98844 synaptotagmin II Syt2  
1449867\_at 0.90721 homeo box C9 Hoxc9  
1449868\_at 0.93685 T-box 6 Tbx6  
1449869\_at 1.05970 pre-B lymphocyte gene 1 Vpreb1  
1449870\_a\_at 1.06841 "ATPase, H<sup>+</sup> transporting, lysosomal V0 subunit A2" Atp6v0a2  
1449871\_at 0.76086 T-box18 Tbx18  
1449872\_at 0.93417 heat shock protein 3 Hspb3  
1449873\_at 1.11183 bone morphogenetic protein 8a Bmp8a  
1449874\_at 1.34939 lymphocyte antigen 96 Ly96  
1449875\_s\_at 1.15681 "histocompatibility 2, T region locus 22 /// histocompatibility 2, T region locus 9" H2-T22 /// H2-T9  
1449876\_at 0.97475 "protein kinase, cGMP-dependent, type I" Prkg1  
1449877\_s\_at 0.77341 kinesin family member C1 Kifc1  
1449878\_a\_at 0.89806 "solute carrier family 12, member 6" Slc12a6  
1449879\_at 0.97545 RIKEN cDNA 1700008F21 gene 1700008F21Rik  
1449880\_s\_at 1.03709 "bone gamma-carboxyglutamate protein, related sequence 1 /// bone gamma carboxyglutamate protein 1 /// bone gamma-carboxyglutamate protein 2" Bglap-rs1 /// Bglap1 /// Bglap2  
1449881\_a\_at 0.95027 calcium-sensing receptor Casr  
1449882\_a\_at 1.11413 calcium-sensing receptor Casr  
1449883\_at 0.93689 FXYD domain-containing ion transport regulator 2 Fxyd2  
1449884\_at 0.93391 EF-hand calcium binding domain 2 Efcab2  
1449885\_at 0.94469 transmembrane protein 47 Tmem47  
1449886\_a\_at 1.02717 translocase of inner mitochondrial membrane 9 homolog (yeast) Timm9  
1449887\_at 0.79138 RIKEN cDNA 2310010I16 gene 2310010I16Rik  
1449888\_at 0.95866 endothelial PAS domain protein 1 Epas1  
1449889\_a\_at 0.97711 OCIA domain containing 1 Ociad1  
1449890\_at 1.01687 "UDP glucuronosyltransferase 2 family, polypeptide B37" Ugt2b37  
1449891\_a\_at 1.02068 "discoidin, CUB and LCCL domain containing 2" Dcbl2  
1449892\_at 1.05097 lysozyme-like 1 Lyzl1  
1449893\_a\_at 1.27503 leucine-rich repeats and immunoglobulin-like domains 1 Lrig1  
1449894\_at 1.03361 leucine rich repeat containing 18 Lrrc18  
1449895\_at 0.82995 preproacrosin Acr



1449896\_at 0.92593 --- ---  
1449897\_a\_at 0.90684 mature T-cell proliferation 1 Mtcp1  
1449898\_at 0.84239 septin 1 1-Sep  
1449899\_at 0.87767 "glutamate receptor, ionotropic, NMDA3B" Grin3b  
1449900\_at 1.00514 galactosylceramidase Galc  
1449901\_a\_at 1.24626 mitogen-activated protein kinase kinase kinase 6 Map3k6  
1449902\_at 0.99129 RIKEN cDNA 1110058A15 gene 1110058A15Rik  
1449903\_at 1.09236 cytotoxic and regulatory T cell molecule Crtam  
1449904\_at 1.00833 dopey family member 2 Dopey2  
1449905\_at 1.01615 "C-type lectin domain family 4, member f" Clec4f  
1449906\_at 0.94552 "selectin, platelet" Selp  
1449907\_at 0.82698 "beta-carotene 15,15'-monooxygenase" Bcmo1  
1449908\_at 0.83056 gastric inhibitory polypeptide Gip  
1449909\_at 1.11695 RIKEN cDNA 2010005H15 gene 2010005H15Rik  
1449910\_at 0.93072 RIKEN cDNA 2210418O10 gene 2210418O10Rik  
1449911\_at 0.83788 lymphocyte-activation gene 3 Lag3  
1449912\_at 0.95187 "synovial sarcoma, X member B, breakpoint 1 /// similar to SSXB1 protein"  
Ssxb1 /// LOC631002  
1449913\_at 0.91722 zinc finger protein 2 Zfp2  
1449914\_at 0.92560 RIB43A domain with coiled-coils 1 Ribc1  
1449915\_at 1.03360 zinc finger protein 202 Zfp202  
1449916\_at 1.04343 pre-B-cell leukemia transcription factor 4 Pbx4  
1449917\_at 0.88223 paired-like homeodomain transcription factor 3 Pitx3  
1449918\_at 1.01552 CD209g antigen Cd209g  
1449919\_at 0.97296 keratin associated protein 6-2 Krtap6-2  
1449920\_at 0.98555 "cytochrome P450, family 19, subfamily a, polypeptide 1" Cyp19a1  
1449921\_s\_at 0.98815 copine VI Cpne6  
1449922\_at 0.99841 RIKEN cDNA 4933425L06 gene 4933425L06Rik  
1449923\_at 0.81936 RIKEN cDNA 1700018F24 gene 1700018F24Rik  
1449924\_at 0.81551 proteoglycan 3 Prg3  
1449925\_at 1.05540 chemokine (C-X-C motif) receptor 3 Cxcr3  
1449926\_at 0.84638 "tumor necrosis factor (ligand) superfamily, member 7" Tnfsf7  
1449927\_at 1.11040 S100 calcium binding protein A5 S100a5  
1449928\_at 0.95065 dynein light chain Tctex-type 3 Dynlt3  
1449929\_at 0.88436 dynein light chain Tctex-type 3 Dynlt3  
1449930\_a\_at 1.03270 "signal sequence receptor, beta" Ssr2  
1449931\_at 0.77115 cytoplasmic polyadenylation element binding protein 4 Cpeb4  
1449932\_at 0.97477 "casein kinase 1, delta" Csnk1d  
1449933\_a\_at 0.98581 RIKEN cDNA 5730449L18 gene 5730449L18Rik  
1449934\_at 1.09591 purine rich element binding protein A Pura  
1449935\_a\_at 1.03912 "DnaJ (Hsp40) homolog, subfamily A, member 3" Dnaja3  
1449936\_at 0.99923 RIKEN cDNA 8430419L09 gene 8430419L09Rik  
1449937\_at 0.95805 placental protein 11 related Pp11r

1449938\_at 1.04042 placental protein 11 related Pp11r  
1449939\_s\_at 0.81588 delta-like 1 homolog (Drosophila) Dlk1  
1449940\_a\_at 0.95547 "eukaryotic translation initiation factor 2B, subunit 4 delta" Eif2b4  
1449941\_at 1.10120 myosin IE Myo1e  
1449942\_a\_at 0.95943 integrin linked kinase Ilk  
1449943\_at 0.88693 lunatic fringe gene homolog (Drosophila) Lfng  
1449944\_a\_at 1.22901 "Sec61, alpha subunit 2 (S. cerevisiae)" Sec61a2  
1449945\_at 1.15758 "peroxisome proliferative activated receptor, gamma, coactivator 1 beta"  
Ppargc1b  
1449946\_a\_at 0.98247 zinc finger protein 593 Zfp593  
1449947\_s\_at 1.03808 AT motif binding factor 1 Atbf1  
1449948\_at 0.96595 ERO1-like beta (S. cerevisiae) Ero1lb  
1449949\_a\_at 1.06824 coxsackievirus and adenovirus receptor Cxadr  
1449950\_at 1.00877 RIKEN cDNA 5830415L20 gene 5830415L20Rik  
1449951\_at 1.07002 nuclear factor of kappa light polypeptide gene enhancer in B-cells inhibitor-like  
1 Nfkbil1  
1449952\_s\_at 0.95823 "transmembrane protease, serine 8 (intestinal)" Tmprss8  
1449953\_at 1.03735 integrin beta 3 binding protein (beta3-endonexin) Itgb3bp  
1449954\_at 0.94549 hyaluronoglucosaminidase 1 /// N-acetyltransferase 6 Hyal1 /// Nat6  
1449955\_at 1.03133 "calcium channel, voltage-dependent, alpha 1F subunit" Cacna1f  
1449956\_at 1.07386 "protein kinase C, epsilon" Prkce  
1449957\_at 0.94801 "protein tyrosine phosphatase, receptor type, V" Ptprv  
1449958\_a\_at 0.90543 fibroblast growth factor 14 Fgf14  
1449959\_x\_at 0.92121 small proline rich-like 9 Sprrl9  
1449960\_at 0.83376 neuronal pentraxin 2 Nptx2  
1449961\_at 1.06503 rabphilin 3A Rph3a  
1449962\_at 1.01836 preferentially expressed antigen in melanoma-like 3 /// expressed sequence  
AV320801 /// similar to preferentially expressed antigen in melanoma Pramel3 /// AV320801 ///  
LOC666040  
1449963\_at 1.02562 RIKEN cDNA 2310040M23 gene 2310040M23Rik  
1449964\_a\_at 0.98637 malonyl-CoA decarboxylase Mlycd  
1449965\_at 1.09264 mast cell protease 8 Mcpt8  
1449966\_s\_at 0.97291 calcium binding protein 39-like Cab39l  
1449967\_at 1.05009 single-minded homolog 1 (Drosophila) Sim1  
1449968\_s\_at 1.09651 acyl-CoA thioesterase 9 /// acyl-CoA thioesterase 10 Acot9 /// Acot10  
1449969\_at 0.99802 tropomodulin 4 Tmod4  
1449970\_at 0.84321 calpain 12 Capn12  
1449971\_a\_at 0.90088 CD209f antigen Cd209f  
1449972\_s\_at 0.83266 zinc finger protein 97 /// cDNA sequence BC018101 Zfp97 /// BC018101  
1449973\_a\_at 1.02104 "proline, glutamic acid and leucine rich protein 1" Pelp1  
1449974\_at 1.04953 "glyceraldehyde-3-phosphate dehydrogenase, spermatogenic" Gapdhs  
1449975\_a\_at 1.11933 parkin Park2  
1449976\_a\_at 0.95604 G protein-coupled receptor 35 Gpr35

1449977\_at 0.96740 early growth response 4 Egr4  
1449978\_at 0.96965 "zinc finger protein 2, Y linked" Zfy2  
1449979\_a\_at 0.96988 "sparc/osteonectin, cwcv and kazal-like domains proteoglycan 3" Spock3  
1449980\_a\_at 1.00114 "gamma-aminobutyric acid (GABA-A) receptor, subunit delta" Gabrd  
1449981\_a\_at 1.03951 N-acetyltransferase 2 (arylamine N-acetyltransferase) Nat2  
1449982\_at 0.92788 interleukin 11 Il11  
1449983\_a\_at 1.10266 "NAD(P)H dehydrogenase, quinone 2" Nqo2  
1449984\_at 1.83016 chemokine (C-X-C motif) ligand 2 Cxcl2  
1449985\_at 0.93909 RIKEN cDNA 1700072E05 gene 1700072E05Rik  
1449986\_at 0.95273 RIKEN cDNA 2310034C09 gene 2310034C09Rik  
1449987\_at 0.96088 anaplastic lymphoma kinase Alk  
1449988\_at 0.88851 "GTPase, IMAP family member 1" Gimap1  
1449989\_at 1.09992 mast cell protease 2 Mcpt2  
1449990\_at 0.84942 interleukin 2 /// similar to Interleukin-2 precursor (IL-2) (T-cell growth factor) (TCGF) Il2 /// LOC630222  
1449991\_at 1.01119 CD244 natural killer cell receptor 2B4 /// similar to Natural killer cell receptor 2B4 precursor (NKR2B4) (NK cell type I receptor protein 2B4) (CD244 antigen) (Non MHC restricted killing associated) Cd244 /// LOC677008  
1449992\_at 0.97926 "protease, serine, 29" Prss29  
1449993\_at 1.19290 cDNA sequence AF119384 AF119384  
1449994\_at 1.03550 epithelial mitogen Epgn  
1449995\_at 1.03699 RIKEN cDNA 4933421I07 gene 4933421I07Rik  
1449996\_a\_at 1.11105 "tropomyosin 3, gamma" Tpm3  
1449997\_at 0.96757 "tropomyosin 3, gamma" Tpm3  
1449998\_at 1.03022 "NK-3 transcription factor, locus 1 (Drosophila)" Nkx3-1  
1449999\_a\_at 0.82722 "calcium channel, voltage-dependent, alpha2/delta subunit 1" Cacna2d1  
1450000\_at 1.06163 "NACHT, leucine rich repeat and PYD containing 4C" Nalp4c  
1450001\_a\_at 1.06678 Usher syndrome 1C homolog (human) Ush1c  
1450002\_at 0.80017 genomic screened homeo box 1 Gsh1  
1450003\_at 1.03196 "adrenergic receptor, alpha 2b" Adra2b  
1450004\_at 1.00859 thymic stromal lymphopoietin Tslp  
1450005\_x\_at 0.97401 "EGF-like-domain, multiple 9" Egfl9  
1450006\_at 0.93803 nuclear receptor coactivator 4 /// similar to nuclear receptor coactivator 4 Ncoa4 /// LOC627557  
1450007\_at 0.90517 RIKEN cDNA 1500003O03 gene 1500003O03Rik  
1450008\_a\_at 0.98433 "catenin (cadherin associated protein), beta 1" Ctnnb1  
1450009\_at 1.07220 lactotransferrin Ltf  
1450010\_at 1.20767 hydroxysteroid (17-beta) dehydrogenase 12 Hsd17b12  
1450011\_at 1.13464 hydroxysteroid (17-beta) dehydrogenase 12 Hsd17b12  
1450012\_x\_at 1.02074 "3-monooxygenase/tryptophan 5-monooxygenase activation protein, gamma polypeptide" Ywhag  
1450013\_at 0.92501 RIKEN cDNA 2900073G15 gene 2900073G15Rik  
1450014\_at 0.86431 claudin 1 Cldn1

1450015\_x\_at 1.13565 sphingosine-1-phosphate phosphatase 1 Sgpp1  
1450016\_at 1.17442 cyclin G1 Ccng1  
1450017\_at 1.09791 cyclin G1 Ccng1  
1450018\_s\_at 0.98044 "solute carrier family 25, member 30" Slc25a30  
1450019\_at 1.22101 chemokine (C-X3-C) receptor 1 Cx3cr1  
1450020\_at 0.96980 chemokine (C-X3-C) receptor 1 Cx3cr1  
1450021\_at 0.92386 ubiquilin 2 Ubqln2  
1450022\_at 0.99527 GTP binding protein 1 Gtpbp1  
1450023\_at 0.95078 GTP binding protein 1 Gtpbp1  
1450024\_at 0.93700 --- ---  
1450025\_at 0.87906 par-6 partitioning defective 6 homolog gamma (C. elegans) Pard6g  
1450026\_a\_at 0.93369 "UDP-GlcNAc:betaGal beta-1,3-N-acetylglucosaminyltransferase 2" B3gnt2  
1450027\_at 0.70004 syndecan 3 Sdc3  
1450028\_a\_at 0.91573 LanC (bacterial lantibiotic synthetase component C)-like 2 Lancl2  
1450029\_s\_at 1.11340 integrin alpha 9 Itga9  
1450030\_at 0.93758 dynactin 4 Dctn4  
1450031\_at 0.96823 "AF4/FMR2 family, member 4" Aff4  
1450032\_at 0.96909 "solute carrier organic anion transporter family, member 2a1" Slco2a1  
1450033\_a\_at 0.91120 signal transducer and activator of transcription 1 Stat1  
1450034\_at 1.21133 signal transducer and activator of transcription 1 Stat1  
1450035\_a\_at 0.98234 PRP40 pre-mRNA processing factor 40 homolog A (yeast) Prpf40a  
1450036\_at 0.76495 serum/glucocorticoid regulated kinase 3 Sgk3  
1450037\_at 0.91664 "ubiquitin specific peptidase 9, X chromosome" Usp9x  
1450038\_s\_at 0.97343 "ubiquitin specific peptidase 9, X chromosome" Usp9x  
1450039\_at 1.09340 "ubiquitin specific peptidase 9, X chromosome" Usp9x  
1450040\_at 0.85997 tissue inhibitor of metalloproteinase 2 Timp2  
1450041\_a\_at 0.98137 tubby candidate gene Tub  
1450042\_at 1.00985 aristaless related homeobox gene (Drosophila) Arx  
1450043\_at 1.01887 frizzled homolog 7 (Drosophila) Fzd7  
1450044\_at 0.87551 frizzled homolog 7 (Drosophila) Fzd7  
1450045\_at 1.40421 serine/arginine repetitive matrix 1 Srrm1  
1450046\_at 1.00226 transmembrane protein 59 Tmem59  
1450047\_at 0.99244 heparan sulfate 6-O-sulfotransferase 2 Hs6st2  
1450048\_a\_at 0.89627 "isocitrate dehydrogenase 2 (NADP+), mitochondrial" Idh2  
1450049\_a\_at 1.14357 histone cell cycle regulation defective homolog A (S. cerevisiae) Hira  
1450050\_at 1.11276 histone cell cycle regulation defective homolog A (S. cerevisiae) Hira  
1450051\_at 0.97876 alpha thalassemia/mental retardation syndrome X-linked homolog (human) Atrx  
1450052\_at 1.05327 kinesin family member 2A Kif2a  
1450053\_at 1.06596 Kinesin family member 2A Kif2a  
1450054\_at 0.88562 adducin 1 (alpha) Add1  
1450055\_at 1.26657 visinin-like 1 Vsnl1  
1450056\_at 1.08183 adenomatosis polyposis coli Apc  
1450057\_at 1.01732 RIKEN cDNA 2610042O14 gene 2610042O14Rik

|              |         |                                                       |               |
|--------------|---------|-------------------------------------------------------|---------------|
| 1450058_at   | 0.69128 | aspartate-beta-hydroxylase                            | Asph          |
| 1450059_at   | 0.82054 | ---                                                   | ---           |
| 1450060_at   | 1.00597 | polymeric immunoglobulin receptor                     | Pigr          |
| 1450061_at   | 0.97111 | ectodermal-neural cortex 1                            | Enc1          |
| 1450062_a_at | 0.81461 | "melanoma antigen, family D, 1"                       | Maged1        |
| 1450063_at   | 0.93728 | formin 2                                              | Fmn2          |
| 1450064_at   | 0.90896 | ---                                                   | ---           |
| 1450065_at   | 0.95189 | adenylate cyclase 7                                   | Adcy7         |
| 1450066_at   | 0.99029 | ubiquitin protein ligase E3 component n-recognin 1    | Ubr1          |
| 1450067_a_at | 0.96803 | RIKEN cDNA 1810034K20 gene                            | 1810034K20Rik |
| 1450068_at   | 0.82480 | "bromodomain adjacent to zinc finger domain, 1B"      | Baz1b         |
| 1450069_a_at | 0.98138 | "CUG triplet repeat, RNA binding protein 2"           | Cugbp2        |
| 1450070_s_at | 1.00632 | p21 (CDKN1A)-activated kinase 1                       | Pak1          |
| 1450071_at   | 1.07467 | "ash1 (absent, small, or homeotic)-like (Drosophila)" | Ash11         |
| 1450072_at   | 1.06258 | "ash1 (absent, small, or homeotic)-like (Drosophila)" | Ash11         |
| 1450073_at   | 0.90061 | kinesin family member 3B                              | Kif3b         |
| 1450074_at   | 0.95353 | kinesin family member 3B                              | Kif3b         |
| 1450075_at   | 1.00517 | "polymerase (DNA directed), eta (RAD 30 related)"     | Polh          |
| 1450076_at   | 0.96623 | RIKEN cDNA 4933411K20 gene                            | 4933411K20Rik |
| 1450077_at   | 0.98161 | chromodomain helicase DNA binding protein 1           | Chd1          |
| 1450078_at   | 0.97656 | Nik related kinase                                    | Nrk           |
| 1450079_at   | 1.03340 | Nik related kinase                                    | Nrk           |
| 1450080_at   | 0.94066 | CAAX box 1 homolog C (human)                          | Cxx1c         |
| 1450081_x_at | 1.09677 | glucose phosphate isomerase 1                         | Gpi1          |
| 1450082_s_at | 1.30721 | ets variant gene 5                                    | Etv5          |
| 1450083_at   | 0.94787 | "CCR4-NOT transcription complex, subunit 4"           | Cnot4         |
| 1450084_s_at | 0.85979 | influenza virus NS1A binding protein                  | Ivns1abp      |
| 1450085_at   | 0.89121 | ---                                                   | ---           |
| 1450086_at   | 0.93941 | glucocorticoid modulatory element binding protein 1   | Gmeb1         |
| 1450087_a_at | 1.30701 | nucleolar and coiled-body phosphoprotein 1            | Nolc1         |
| 1450088_a_at | 0.96978 | myelin-associated oligodendrocytic basic protein      | Mobp          |
| 1450089_a_at | 0.85957 | "signal recognition particle receptor, B subunit"     | Srprb         |
| 1450090_at   | 0.98690 | zinc finger protein 101                               | Zfp101        |
| 1450091_at   | 1.00764 | immunoglobulin mu binding protein 2                   | Ighmbp2       |
| 1450092_at   | 0.93334 | immunoglobulin mu binding protein 2                   | Ighmbp2       |
| 1450093_s_at | 1.04816 | zinc finger and BTB domain containing 7a              | Zbtb7a        |
| 1450094_at   | 0.95888 | RAN binding protein 17                                | Ranbp17       |
| 1450095_a_at | 0.89205 | "acylphosphatase 1, erythrocyte (common) type"        | Acyp1         |
| 1450096_at   | 0.97357 | "guanine nucleotide binding protein, alpha 12"        | Gna12         |
| 1450097_s_at | 0.81759 | "guanine nucleotide binding protein, alpha 12"        | Gna12         |
| 1450098_at   | 1.03844 | RIKEN cDNA 0610010D20 gene                            | 0610010D20Rik |
| 1450099_a_at | 1.11839 | "glucosidase, beta, acid"                             | Gba           |
| 1450100_a_at | 0.98172 | transcription elongation regulator 1 (CA150)          | Tcerg1        |

1450101\_a\_at 0.86571 "membrane associated guanylate kinase, WW and PDZ domain containing 3" Magi3

1450102\_a\_at 0.94814 autocrine motility factor receptor Amfr

1450103\_a\_at 0.93618 "pleckstrin homology, Sec7 and coiled-coil domains 2" Pscd2

1450104\_at 0.77569 a disintegrin and metallopeptidase domain 10 Adam10

1450105\_at 0.90209 --- ---

1450106\_a\_at 0.82011 Ena-vasodilator stimulated phosphoprotein Evl

1450107\_a\_at 0.92110 renin binding protein Renbp

1450108\_at 0.92834 kinesin family member 1A Kif1a

1450109\_s\_at 1.08688 "ATP-binding cassette, sub-family C (CFTR/MRP), member 2" Abcc2

1450110\_at 0.82291 "alcohol dehydrogenase 7 (class IV), mu or sigma polypeptide" Adh7

1450111\_a\_at 1.12024 nudix (nucleoside diphosphate linked moiety X)-type motif 8 Nudt8

1450112\_a\_at 1.00422 growth arrest specific 2 Gas2

1450113\_at 0.92572 --- ---

1450114\_at 0.94446 kinase suppressor of ras 1 Ksr1

1450115\_at 0.87157 "guanine nucleotide binding protein, alpha q polypeptide" Gnaq

1450116\_at 1.00835 "DNA segment, Chr 3, ERATO Doi 300, expressed" D3Ertd300e

1450117\_at 0.67267 transcription factor 3 Tcf3

1450118\_a\_at 0.81605 "troponin T3, skeletal, fast" Tnnt3

1450119\_at 1.35404 dystonin Dst

1450120\_at 0.90847 "sodium channel, voltage-gated, type I, alpha" Scn1a

1450121\_at 0.93474 "sodium channel, voltage-gated, type I, alpha" Scn1a

1450122\_at 0.98433 "protein tyrosine phosphatase, receptor type, G" Ptpg

1450123\_at 0.90976 "ryanodine receptor 2, cardiac" Ryr2

1450124\_a\_at 0.96013 "ATPase, Ca++ transporting, ubiquitous" Atp2a3

1450125\_at 1.10278 GATA binding protein 5 Gata5

1450126\_at 1.06457 GATA binding protein 5 Gata5

1450127\_a\_at 1.01080 glucagon receptor Gcgr

1450128\_at 0.99451 "phospholipase A2, group IIA (platelets, synovial fluid)" Pla2g2a

1450129\_a\_at 0.91206 suppressor of cytokine signaling 6 Socs6

1450130\_at 0.91199 xenotropic and polytropic retrovirus receptor 1 Xpr1

1450131\_a\_at 0.93141 B-box and SPRY domain containing Bspry

1450132\_at 1.02537 human immunodeficiency virus type I enhancer binding protein 3 Hivep3

1450133\_at 0.85493 "UDP glucuronosyltransferase 2 family, polypeptide A3" Ugt2a3

1450134\_at 1.06455 lysyl oxidase-like 4 Loxl4

1450135\_at 1.03021 frizzled homolog 3 (Drosophila) Fzd3

1450136\_at 0.98737 CD38 antigen Cd38

1450137\_at 0.93648 protein O-fucosyltransferase 1 Pofut1

1450138\_a\_at 1.13901 "serine (or cysteine) peptidase inhibitor, clade B, member 6a" Serpinb6a

1450139\_at 1.18671 endoplasmic reticulum (ER) to nucleus signalling 2 Ern2

1450140\_a\_at 1.11983 cyclin-dependent kinase inhibitor 2A Cdkn2a

1450141\_at 1.01157 "ATP-binding cassette, sub-family G (WHITE), member 3" Abcg3

1450142\_a\_at 0.99318 "caspase recruitment domain family, member 14" Card14

1450143\_at 1.01646 RAS guanyl releasing protein 1 Rasgrp1  
1450144\_at 1.08321 phospholipase A2 receptor 1 Pla2r1  
1450145\_at 0.91606 DNA binding protein with his-thr domain Dbpht1  
1450146\_at 0.94776 frequenin homolog (Drosophila) Freq  
1450147\_at 0.96117 neuronal pentraxin receptor Nptxr  
1450148\_at 1.11619 mucolipin 3 Mcoln3  
1450149\_a\_at 0.94960 "protein phosphatase 1, catalytic subunit, gamma isoform /// similar to protein phosphatase 1 gamma2" Ppp1cc /// LOC434233  
1450150\_a\_at 1.03583 ribosomal protein L13 Rpl13  
1450151\_at 0.89818 zinc finger protein 316 Zfp316  
1450152\_at 0.98650 zinc finger protein 316 Zfp316  
1450153\_at 0.98989 golgi associated PDZ and coiled-coil motif containing Gopc  
1450154\_at 1.02321 folate hydrolase Folh1  
1450155\_at 1.05591 integrin alpha 4 Itga4  
1450156\_a\_at 0.97322 hyaluronan mediated motility receptor (RHAMM) Hmnr  
1450157\_a\_at 1.01290 hyaluronan mediated motility receptor (RHAMM) Hmnr  
1450158\_at 0.98225 rad and gem related GTP binding protein 1 Rem1  
1450159\_at 0.88634 rad and gem related GTP binding protein 1 Rem1  
1450160\_at 0.97857 leukemia inhibitory factor Lif  
1450161\_at 1.00794 inhibitor of kappaB kinase gamma Ikbkg  
1450162\_at 0.90449 "D4, zinc and double PHD fingers, family 3" Dpf3  
1450163\_a\_at 0.93648 Werner syndrome homolog (human) Wrn  
1450164\_at 1.02012 achaete-scute complex homolog-like 1 (Drosophila) Ascl1  
1450165\_at 1.38228 schlafen 2 Slfn2  
1450166\_at 0.81652 iduronate 2-sulfatase Ids  
1450167\_at 0.90699 "RAB37, member of RAS oncogene family" Rab37  
1450168\_at 1.05123 ankyrin repeat domain 12 Ankrd12  
1450169\_at 0.94192 "solute carrier family 4 (anion exchanger), member 4" Slc4a4  
1450170\_x\_at 1.08781 "Histocompatibility 2, K1, K region" H2-K1  
1450171\_x\_at 1.00232 granzyme E Gzme  
1450172\_at 0.93737 Pbx/knotted 1 homeobox Pknox1  
1450173\_at 1.13531 receptor (TNFRSF)-interacting serine-threonine kinase 2 Ripk2  
1450174\_at 0.91004 "protein tyrosine phosphatase, receptor type, T" Ptptrt  
1450175\_a\_at 1.04360 cathepsin M Ctsm  
1450176\_at 0.84372 endoplasmic reticulum (ER) to nucleus signalling 1 Ern1  
1450177\_at 0.94285 "nerve growth factor receptor (TNFR superfamily, member 16)" Ngfr  
1450178\_at 1.06910 "bromodomain, testis-specific" Brdt  
1450179\_at 0.88630 sclerostin Sost  
1450180\_a\_at 0.85389 "retinoic acid receptor, alpha" Rara  
1450181\_at 1.02341 cut-like 2 (Drosophila) Cutl2  
1450182\_at 0.91151 chloride channel Ka Clnka  
1450183\_a\_at 1.06655 SH2B adaptor protein 3 Sh2b3  
1450184\_s\_at 0.91915 thyrotroph embryonic factor Tef

1450185\_a\_at 0.98223 "potassium inwardly-rectifying channel, subfamily J, member 15" Kcnj15  
 1450186\_s\_at 0.86057 "GNAS (guanine nucleotide binding protein, alpha stimulating) complex locus" Gnas  
 1450187\_a\_at 0.90519 galactose-1-phosphate uridyl transferase Galt  
 1450188\_s\_at 1.15022 "lipase, endothelial" Lipg  
 1450189\_at 1.08133 Kell blood group precursor (McLeod phenotype) homolog Xkh  
 1450190\_at 0.91492 zinc finger protein 106 Zfp106  
 1450191\_a\_at 1.04473 SRY-box containing gene 13 Sox13  
 1450192\_at 0.91526 luteinizing hormone/choriogonadotropin receptor Lhcgr  
 1450193\_at 0.86582 "hyperpolarization-activated, cyclic nucleotide-gated K+ 1" Hcn1  
 1450194\_a\_at 0.96187 myeloblastosis oncogene Myb  
 1450195\_at 0.81514 N-deacetylase/N-sulfotransferase (heparin glucosaminyl) 4 Ndst4  
 1450196\_s\_at 0.94303 "glycogen synthase 1, muscle" Gys1  
 1450197\_at 1.05812 retinal pigment epithelium 65 Rpe65  
 1450198\_at 0.97277 dual specificity phosphatase 13 Dusp13  
 1450199\_a\_at 1.15358 stabilin 1 Stab1  
 1450200\_s\_at 0.89083 "colony stimulating factor 2 receptor, beta 1, low-affinity (granulocyte-macrophage) /// colony stimulating factor 2 receptor, beta 2, low-affinity (granulocyte-macrophage)" Csf2rb1 /// Csf2rb2  
 1450201\_at 1.01760 --- ---  
 1450202\_at 1.02599 "glutamate receptor, ionotropic, NMDA1 (zeta 1)" Grin1  
 1450203\_at 1.01544 SET and MYND domain containing 1 Smyd1  
 1450204\_a\_at 0.80398 myoneurin Mynn  
 1450205\_at 0.88298 --- ---  
 1450206\_at 0.94979 deleted in liver cancer 1 Dlc1  
 1450207\_at 1.05583 leukemia inhibitory factor receptor Lifr  
 1450208\_a\_at 1.04538 "engulfment and cell motility 1, ced-12 homolog (C. elegans)" Elmo1  
 1450209\_at 0.91262 homeo box D4 Hoxd4  
 1450210\_at 0.98563 bone morphogenetic protein 15 Bmp15  
 1450211\_at 0.93888 low density lipoprotein-related protein 1B (deleted in tumors) Lrp1b  
 1450212\_at 1.13071 formin-like 1 Fmn1  
 1450213\_at 0.93184 phosphodiesterase 7B Pde7b  
 1450214\_at 0.97965 adenosine A2b receptor Adora2b  
 1450215\_at 0.98279 recoverin Rcvrn  
 1450216\_at 1.08386 protocadherin beta 16 Pcdhb16  
 1450217\_at 0.76172 chemokine (C-C motif) ligand 28 Ccl28  
 1450218\_at 0.98168 chemokine (C-C motif) ligand 28 Ccl28  
 1450219\_at 1.01624 5-hydroxytryptamine (serotonin) receptor 1A Htr1a  
 1450220\_a\_at 0.88857 SAM pointed domain containing ets transcription factor Spdef  
 1450221\_at 1.00373 RIKEN cDNA 4933417A18 gene 4933417A18Rik  
 1450222\_x\_at 0.83903 kallikrein 1-related peptidase b4 Klk1b4  
 1450223\_at 1.04053 apoptotic peptidase activating factor 1 Apaf1  
 1450224\_at 0.49426 "procollagen, type IV, alpha 3" Col4a3



|              |         |                                                                              |                 |
|--------------|---------|------------------------------------------------------------------------------|-----------------|
| 1450225_at   | 0.89090 | insulin receptor                                                             | Insr            |
| 1450226_at   | 1.05941 | prolactin receptor                                                           | Prlr            |
| 1450227_at   | 0.95492 | ankyrin repeat domain 6                                                      | Ankrd6          |
| 1450228_a_at | 0.94306 | "phosphatidylinositol-4-phosphate 5-kinase, type 1 gamma"                    | Pip5k1c         |
| 1450229_at   | 0.94957 | "cofactor required for Sp1 transcriptional activation, subunit 2"            | Crsp2           |
| 1450230_at   | 1.03417 | "DNA segment, Chr 17, human D6S56E 3"                                        | D17H6S56E-3     |
| 1450231_a_at | 0.85152 | baculoviral IAP repeat-containing 4                                          | Birc4           |
| 1450232_at   | 0.97676 | baculoviral IAP repeat-containing 4                                          | Birc4           |
| 1450233_a_at | 1.02402 | radial spokehead-like 1                                                      | Rshl1           |
| 1450234_at   | 0.94335 | "membrane-spanning 4-domains, subfamily A, member 6C"                        | Ms4a6c          |
| 1450235_at   | 1.12423 | "FYVE, RhoGEF and PH domain containing 3"                                    | Fgd3            |
| 1450236_at   | 0.89716 | forkhead box O3a                                                             | Foxo3a          |
| 1450237_at   | 0.93161 | deoxyribonuclease II beta                                                    | Dnase2b         |
| 1450238_at   | 1.04581 | "glucosaminyl (N-acetyl) transferase 2, I-branching enzyme"                  | Gcnt2           |
| 1450239_at   | 1.02062 | "glycine receptor, alpha 3 subunit"                                          | Gla3            |
| 1450240_a_at | 0.99064 | synaptotagmin-like 1                                                         | Sytl1           |
| 1450241_a_at | 1.07778 | ecotropic viral integration site 2a                                          | Evi2a           |
| 1450242_at   | 0.95523 | toll-like receptor 5                                                         | Tlr5            |
| 1450243_a_at | 0.88811 | Down syndrome critical region gene 1-like 1                                  | Dscr111         |
| 1450244_a_at | 1.11720 | mitogen activated protein kinase kinase kinase 2                             | Map4k2          |
| 1450245_at   | 1.11453 | "solute carrier family 10, member 2"                                         | Slc10a2         |
| 1450246_at   | 0.98930 | fucosyltransferase 2                                                         | Fut2            |
| 1450247_a_at | 0.94546 | secretory carrier membrane protein 5                                         | Scamp5          |
| 1450248_at   | 0.96064 | a disintegrin and metallopeptidase domain 11                                 | Adam11          |
| 1450249_s_at | 1.09692 | kinesin family member 5A /// kinesin family member 5C                        | Kif5a /// Kif5c |
| 1450250_at   | 0.92490 | OTU domain containing 7A                                                     | Otud7a          |
| 1450251_a_at | 1.05727 | ligand of numb-protein X 1                                                   | Lnx1            |
| 1450252_at   | 0.89730 | "one cut domain, family member 1"                                            | Onecut1         |
| 1450253_a_at | 0.98650 | mitogen activated protein kinase kinase kinase 4                             | Map3k4          |
| 1450254_at   | 1.04792 | telomerase reverse transcriptase                                             | Tert            |
| 1450255_at   | 1.10417 | Cdc42 GTPase-activating protein                                              | Cdgap           |
| 1450256_at   | 1.07874 | cerberus 1 homolog (Xenopus laevis)                                          | Cer1            |
| 1450257_at   | 0.97089 | cerberus 1 homolog (Xenopus laevis)                                          | Cer1            |
| 1450258_a_at | 0.89957 | "ELAV (embryonic lethal, abnormal vision, Drosophila)-like 4 (Hu antigen D)" | Elavl4          |
| 1450259_a_at | 0.93565 | signal transducer and activator of transcription 5A                          | Stat5a          |
| 1450260_at   | 0.98863 | gastrin releasing peptide receptor                                           | Grpr            |
| 1450261_a_at | 1.00385 | "solute carrier family 10 (sodium/bile acid cotransporter family), member 1" | Slc10a1         |
| 1450262_at   | 0.83913 | cardiotrophin-like cytokine factor 1                                         | Clcf1           |
| 1450263_at   | 0.89272 | protocadherin beta 5                                                         | Pcdhb5          |
| 1450264_a_at | 1.10634 | choline kinase alpha                                                         | Chka            |
| 1450265_at   | 0.99970 | MAD homolog 9 (Drosophila)                                                   | Smad9           |

1450266\_at 0.95147 "sodium channel, voltage-gated, type X, alpha" Scn10a  
1450267\_at 0.86554 toll-like receptor 8 Tlr8  
1450268\_at 0.80198 fidgetin Fign  
1450269\_a\_at 1.26799 "phosphofructokinase, liver, B-type" Pfkf  
1450270\_at 0.84245 protocadherin beta 11 Pcdhb11  
1450271\_at 1.05568 PTK6 protein tyrosine kinase 6 Ptk6  
1450272\_at 0.99748 "tumor necrosis factor (ligand) superfamily, member 8" Tnfsf8  
1450273\_at 0.97788 interleukin 1 receptor-like 2 Il1rl2  
1450274\_at 0.98861 RIKEN cDNA 1700108E19 gene 1700108E19Rik  
1450275\_x\_at 1.08962 ubiquitin-conjugating enzyme E2F (putative) Ube2f  
1450276\_a\_at 0.81252 scinderin Scin  
1450277\_at 0.91076 arginine vasopressin receptor 2 Avpr2  
1450278\_at 0.80437 tachykinin receptor 3 Tacr3  
1450279\_at 0.96695 prokineticin receptor 1 Prokr1  
1450280\_a\_at 1.02773 retinal pigment epithelium derived rhodopsin homolog Rrh  
1450281\_a\_at 0.96615 RIKEN cDNA 1700021K02 gene 1700021K02Rik  
1450282\_at 0.87579 fibroblast growth factor 4 Fgf4  
1450283\_at 0.99946 "ATPase, Cu<sup>++</sup> transporting, beta polypeptide" Atp7b  
1450284\_at 1.01926 "phosphodiesterase 3A, cGMP inhibited" Pde3a  
1450285\_at 1.05634 "ubiquitin-activating enzyme E1, Chr Y 1" Ube1y1  
1450286\_at 1.01947 natriuretic peptide receptor 3 Npr3  
1450287\_at 0.96235 neuronal PAS domain protein 3 Npas3  
1450288\_at 0.55421 cadherin 6 Cdh6  
1450289\_at 0.90755 forkhead box D2 Foxd2  
1450290\_at 0.92836 programmed cell death 1 ligand 2 Pcdcl1g2  
1450291\_s\_at 1.00148 "membrane-spanning 4-domains, subfamily A, member 4C" Ms4a4c  
1450292\_a\_at 0.94159 HORMA domain containing 1 Hormad1  
1450293\_at 0.98562 "melanoma antigen, family B, 3" Mageb3  
1450294\_a\_at 0.91747 "potassium inwardly-rectifying channel, subfamily J, member 6" Kcnj6  
1450295\_s\_at 1.22773 poliovirus receptor Pvr  
1450296\_at 1.03053 killer cell lectin-like receptor subfamily B member 1A Klrk1a  
1450297\_at 1.27460 interleukin 6 Il6  
1450298\_at 0.96388 "tumor necrosis factor (ligand) superfamily, member 14" Tnfsf14  
1450299\_at 0.96746 "cholinergic receptor, nicotinic, alpha polypeptide 7" Chrna7  
1450300\_at 0.88164 "gamma-aminobutyric acid (GABA-C) receptor, subunit rho 1" Gabrr1  
1450301\_at 0.99204 histocompatibility 28 H28  
1450302\_at 0.89139 RIKEN cDNA 4930470P17 gene 4930470P17Rik  
1450303\_at 0.99084 ventral anterior homeobox containing gene 2 Vax2  
1450304\_at 0.97525 "killer cell lectin-like receptor subfamily C, member 2" Klrc2  
1450305\_at 1.11308 RIKEN cDNA 4930591A17 gene 4930591A17Rik  
1450306\_at 0.88346 zona pellucida glycoprotein 1 Zp1  
1450307\_x\_at 1.03873 "H2A histone family, member Y3" H2afy3  
1450308\_a\_at 0.96055 5'-3' exoribonuclease 1 Xrn1

1450309\_at 1.01033 astrotactin 2 Astn2  
1450310\_at 0.90675 "glutamate receptor, ionotropic, delta 2 (Grid2) interacting protein 1" Grid2ip  
1450311\_at 0.96984 "solute carrier family 8 (sodium/calcium exchanger), member 3" Slc8a3  
1450312\_at 1.00429 cadherin 20 Cdh20  
1450313\_at 0.91430 "taste receptor, type 1, member 2" Tas1r2  
1450314\_at 0.84055 DEAQ RNA-dependent ATPase Dqx1  
1450315\_at 1.07948 "vomeronasal 1 receptor, D14" V1rd14  
1450316\_at 0.87422 protocadherin beta 13 Pcdhb13  
1450317\_at 1.02003 "C-type lectin domain family 2, member g" Clec2g  
1450318\_a\_at 1.21084 "purinergic receptor P2Y, G-protein coupled 2" P2ry2  
1450319\_at 0.96785 "gamma-aminobutyric acid (GABA-A) receptor, subunit beta 2" Gabrb2  
1450320\_at 0.95167 RIKEN cDNA 4931432E15 gene 4931432E15Rik  
1450321\_at 1.04987 zinc finger protein 354C Zfp354c  
1450322\_s\_at 0.94866 schlafen 3 /// schlafen 4 Slfn3 /// Slfn4  
1450323\_at 1.06530 RIKEN cDNA 5730493B19 gene 5730493B19Rik  
1450324\_a\_at 0.90014 RIKEN cDNA 4930521E07 gene 4930521E07Rik  
1450325\_at 0.87206 angiopoietin 4 Angpt4  
1450326\_at 1.11929 src homology 2 domain-containing transforming protein C3 Shc3  
1450327\_at 0.96570 "purinergic receptor P2X-like 1, orphan receptor" P2rx11  
1450328\_at 0.98701 "Adult male testis cDNA, RIKEN full-length enriched library, clone:1700129L04 product:hypothetical protein, full insert sequence" ---  
1450329\_a\_at 0.95557 "arrestin 3, retinal" Arr3  
1450330\_at 1.02755 interleukin 10 Il10  
1450331\_s\_at 0.99716 "vomeronasal 2, receptor, 4 /// vomeronasal 2, receptor, 5 /// similar to vomeronasal 2, receptor, 4 /// similar to vomeronasal 2, receptor, 15" V2r4 /// V2r5 /// LOC625605 /// LOC665552  
1450332\_s\_at 0.90165 flavin containing monooxygenase 5 Fmo5  
1450333\_a\_at 0.91017 GATA binding protein 2 Gata2  
1450334\_at 0.85837 interleukin 21 Il21  
1450335\_at 0.85002 --- ---  
1450336\_at 1.08693 non-selective cation channel 1 Nscn1  
1450337\_a\_at 1.07295 NIMA (never in mitosis gene a)-related expressed kinase 8 Nek8  
1450338\_x\_at 0.96852 "vomeronasal 2, receptor, 8 /// vomeronasal 2, receptor, 9" V2r8 /// V2r9  
1450339\_a\_at 0.93318 B-cell leukemia/lymphoma 11B Bcl11b  
1450340\_a\_at 0.86170 chloride channel Kb Clcnkb  
1450341\_at 1.03990 protocadherin beta 8 Pcdhb8  
1450342\_at 1.09095 bone morphogenetic protein 8b Bmp8b  
1450343\_at 0.96225 "vomeronasal 1 receptor, D1" V1rd1  
1450344\_a\_at 1.06827 prostaglandin E receptor 3 (subtype EP3) Ptger3  
1450345\_at 1.06556 ubiquilin 1 Ubqln1  
1450346\_at 0.99145 G-protein-coupled receptor 50 Gpr50  
1450347\_at 0.98087 synaptotagmin X Syt10  
1450348\_at 1.07526 "solute carrier family 19 (sodium/hydrogen exchanger), member 3" Slc19a3

1450349\_at 0.90672 syntaxin 1B1 Stx1b1  
 1450350\_a\_at 0.95799 Jun dimerization protein 2 Jundm2  
 1450351\_a\_at 0.97587 restin (Reed-Steinberg cell-expressed intermediate filament-associated protein)  
 Rsn  
 1450352\_at 1.03741 melatonin receptor 1A Mtnr1a  
 1450353\_at 0.95436 "solute carrier family 25 (mitochondrial carrier, peroxisomal membrane  
 protein), member 17" Slc25a17  
 1450354\_a\_at 1.06576 phosphatidylserine synthase 2 Ptdss2  
 1450355\_a\_at 1.00365 "capping protein (actin filament), gelsolin-like" Capg  
 1450356\_at 1.00232 thyrotropin releasing hormone receptor 2 Trhr2  
 1450357\_a\_at 0.97714 chemokine (C-C motif) receptor 6 Ccr6  
 1450358\_at 0.92878 ADP-ribosylation factor-like 4D Arl4d  
 1450359\_at 1.01386 fucosyltransferase 1 Fut1  
 1450360\_at 1.02475 "phospholipase C, gamma 1" Plcg1  
 1450361\_at 0.98347 paired like homeodomain factor 1 Prop1  
 1450362\_at 1.19685 --- ---  
 1450363\_at 0.73011 ankyrin repeat and SOCS box-containing protein 7 Asb7  
 1450364\_a\_at 0.94793 hepatitis A virus cellular receptor 1 Havcr1  
 1450365\_at 0.94273 myozenin 3 Myoz3  
 1450366\_at 0.83887 "harakiri, BCL2 interacting protein (contains only BH3 domain)" Hrk  
 1450367\_at 0.96696 --- ---  
 1450368\_a\_at 1.00415 "protein phosphatase 3, regulatory subunit B, alpha isoform (calcineurin B,  
 type I)" Ppp3r1  
 1450369\_at 1.03281 folliculogenesis specific basic helix-loop-helix Figla  
 1450370\_a\_at 1.00196 Kv channel interacting protein 4 Kcnp4  
 1450371\_at 0.95608 "thyroid stimulating hormone, beta subunit" Tshb  
 1450372\_a\_at 1.14830 ribosomal protein L18 Rpl18  
 1450373\_at 0.97373 proline-rich protein 15 Prp15  
 1450374\_at 1.01104 tuberoinfundibular peptide of 39 residues (TIP39) preprohormone Tifp39  
 1450375\_at 1.00820 persephin Pspn  
 1450376\_at 0.99366 Max interacting protein 1 Mxi1  
 1450377\_at 0.80039 similar to thrombospondin 1 LOC640441  
 1450378\_at 1.29035 TAP binding protein Tapbp  
 1450379\_at 1.05278 moesin Msn  
 1450380\_at 0.76944 ependymin related protein 2 (zebrafish) Epdr2  
 1450381\_a\_at 1.06649 B-cell leukemia/lymphoma 6 Bcl6  
 1450382\_at 0.98118 neurofibromatosis 2 Nf2  
 1450383\_at 1.33770 low density lipoprotein receptor Ldlr  
 1450384\_at 1.09018 beta-site APP cleaving enzyme 1 Bace1  
 1450385\_at 1.05681 karyopherin (importin) alpha 3 Kpna3  
 1450386\_at 1.09884 karyopherin (importin) alpha 3 Kpna3  
 1450387\_s\_at 1.89535 adenylate kinase 3 alpha-like 1 Ak311  
 1450388\_s\_at 0.88594 twisted gastrulation homolog 1 (Drosophila) Twsg1

1450389\_s\_at 1.00755 "phosphatidylinositol-4-phosphate 5-kinase, type 1 alpha" Pip5k1a  
1450390\_x\_at 1.08059 ribosomal protein S18 Rps18  
1450391\_a\_at 1.25437 monoglyceride lipase Mgl1  
1450392\_at 0.73752 "ATP-binding cassette, sub-family A (ABC1), member 1" Abca1  
1450393\_a\_at 0.95091 secretory carrier membrane protein 4 Scamp4  
1450394\_at 0.94221 golgi phosphoprotein 3 Golph3  
1450395\_at 0.87923 "solute carrier family 22 (organic cation transporter), member 5" Slc22a5  
1450396\_at 0.99688 stromal antigen 2 Stag2  
1450397\_at 1.17901 microtubule-associated protein 1 B Mtap1b  
1450398\_at 0.91034 "potassium channel, subfamily K, member 5" Kcnk5  
1450399\_at 1.08238 presenilin 1 Psen1  
1450400\_at 1.07826 nuclear receptor coactivator 6 interacting protein Ncoa6ip  
1450401\_at 1.00250 nuclear receptor coactivator 6 interacting protein Ncoa6ip  
1450402\_at 0.97998 peroxisome proliferator activated receptor binding protein Pparbp  
1450403\_at 1.43406 signal transducer and activator of transcription 2 Stat2  
1450404\_at 0.94555 "solute carrier family 23 (nucleobase transporters), member 1" Slc23a1  
1450405\_at 1.22840 mitochondrial ribosomal protein L19 Mrpl19  
1450406\_a\_at 0.92275 "ST3 beta-galactoside alpha-2,3-sialyltransferase 3" St3gal3  
1450407\_a\_at 1.06567 "acidic (leucine-rich) nuclear phosphoprotein 32 family, member A" Anp32a  
1450408\_at 0.99168 chloride channel 7 Clcn7  
1450409\_a\_at 0.87703 RIKEN cDNA 4930570C03 gene 4930570C03Rik  
1450410\_a\_at 0.92241 RIKEN cDNA 4930570C03 gene 4930570C03Rik  
1450411\_at 0.91885 RIKEN cDNA 2900009I07 gene 2900009I07Rik  
1450412\_at 1.17939 transducin (beta)-like 2 Tbl2  
1450413\_at 1.04835 "platelet derived growth factor, B polypeptide" Pdgfb  
1450414\_at 1.13650 "platelet derived growth factor, B polypeptide" Pdgfb  
1450415\_at 1.04497 "phosphodiesterase 6A, cGMP-specific, rod, alpha" Pde6a  
1450416\_at 0.87798 chromobox homolog 5 (Drosophila HP1a) Cbx5  
1450417\_a\_at 0.98935 ribosomal protein S20 /// similar to 40S ribosomal protein S20 /// similar to 40S ribosomal protein S20 Rps20 /// LOC245676 /// LOC623568  
1450418\_a\_at 0.84168 "Yip1 domain family, member 4" Yipf4  
1450419\_at 0.93491 serine hydrolase-like Serhl  
1450420\_at 1.05441 stromal antigen 1 Stag1  
1450421\_at 1.01433 transforming growth factor alpha Tgfa  
1450422\_a\_at 0.92305 KDEL (Lys-Asp-Glu-Leu) containing 1 Kdelc1  
1450423\_s\_at 1.12159 brix domain containing 1 Bxdc1  
1450424\_a\_at 1.03249 interleukin 18 binding protein Il18bp  
1450425\_a\_at 1.06291 RIKEN cDNA 2700062C07 gene 2700062C07Rik  
1450426\_at 0.95292 "cholinergic receptor, nicotinic, alpha polypeptide 6" Chrna6  
1450427\_at 0.88030 "cholinergic receptor, nicotinic, alpha polypeptide 6" Chrna6  
1450428\_at 0.80565 LIM homeobox protein 1 Lhx1  
1450429\_at 0.82625 calpain 6 Capn6  
1450430\_at 1.01807 "mannose receptor, C type 1" Mrc1

1450431\_a\_at 0.93871 "neural precursor cell expressed, developmentally down-regulated gene 4"  
Nedd4

1450432\_s\_at 0.94147 MUS81 endonuclease homolog (yeast) Mus81

1450433\_at 0.91246 recombining binding protein suppressor of hairless-like (Drosophila) Rbpsuhl

1450434\_s\_at 1.15893 "phosphate cytidylyltransferase 1, choline, alpha isoform" Pcyt1a

1450435\_at 0.86516 L1 cell adhesion molecule L1cam

1450436\_s\_at 0.86599 "DnaJ (Hsp40) homolog, subfamily B, member 5" Dnajb5

1450437\_a\_at 0.94289 neural cell adhesion molecule 1 Ncam1

1450438\_at 0.83677 neural cell adhesion molecule 1 Ncam1

1450439\_at 0.94676 host cell factor C1 Hcfc1

1450440\_at 0.99658 glial cell line derived neurotrophic factor family receptor alpha 1 Gfra1

1450441\_at 1.02042 leucine rich repeat containing 50 Lrrc50

1450442\_at 0.82798 adducin 2 (beta) Add2

1450443\_at 1.09414 polypyrimidine tract binding protein 1 Ptbp1

1450444\_a\_at 0.97642 "nuclear receptor subfamily 1, group H, member 3" Nr1h3

1450445\_at 0.96415 "phosphate regulating gene with homologies to endopeptidases on the X  
chromosome (hypophosphatemia, vitamin D resistant rickets)" Phex

1450446\_a\_at 0.93978 suppressor of cytokine signaling 1 Socs1

1450447\_at 0.92465 "hepatic nuclear factor 4, alpha" Hnf4a

1450448\_at 0.90394 stanniocalcin 1 Stc1

1450449\_a\_at 0.79238 RIKEN cDNA 2900002H16 gene 2900002H16Rik

1450450\_at 1.06831 Down syndrome critical region gene 1-like 2 Dscr112

1450451\_at 0.94413 "sparc/osteonectin, cwcv and kazal-like domains proteoglycan 2" Spock2

1450452\_a\_at 0.92106 nuclear prelamin A recognition factor-like Narfl

1450453\_a\_at 0.98298 "phosphodiesterase 6G, cGMP-specific, rod, gamma" Pde6g

1450454\_at 1.16380 "torsin family 3, member A" Tor3a

1450455\_s\_at 0.95563 "aldo-keto reductase family 1, member C12" Akr1c12

1450456\_at 0.94718 interleukin 21 receptor Il21r

1450457\_at 1.01125 Casitas B-lineage lymphoma Cbl

1450458\_at 0.92612 nuclear receptor coactivator 2 Ncoa2

1450459\_at 1.01112 RIKEN cDNA 2010106G01 gene 2010106G01Rik

1450460\_at 1.13582 aquaporin 3 Aqp3

1450461\_at 1.07165 "transcription factor 7, T-cell specific" Tcf7

1450462\_at 1.06236 corticotropin releasing hormone receptor 2 Crhr2

1450463\_at 0.99094 RIKEN cDNA 4833439L19 gene 4833439L19Rik

1450464\_at 0.90865 E4F transcription factor 1 E4f1

1450465\_at 0.95222 "cyclin-dependent kinase 5, regulatory subunit 2 (p39)" Cdk5r2

1450466\_at 0.88327 RIKEN cDNA B230310J22 gene B230310J22Rik

1450467\_at 1.02791 bassoon Bsn

1450468\_at 0.99953 myocilin Myoc

1450469\_at 0.94690 "testis specific protein, Ddc8" Ddc8

1450470\_at 0.96070 --- ---

1450471\_at 0.84520 MAD homolog 3 (Drosophila) Smad3

1450472\_s\_at 0.95353 MAD homolog 3 (Drosophila) Smad3  
1450473\_at 0.99373 protocadherin 12 Pcdh12  
1450474\_at 1.13781 "serine (or cysteine) peptidase inhibitor, clade B, member 9c" Serpinb9c  
1450475\_at 0.86973 distal-less homeobox 3 Dlx3  
1450476\_at 0.91391 cannabinoid receptor 2 (macrophage) Cnr2  
1450477\_at 1.03499 5-hydroxytryptamine (serotonin) receptor 2C Htr2c  
1450478\_a\_at 1.16744 "protein tyrosine phosphatase, non-receptor type 12" Ptpn12  
1450479\_x\_at 1.06739 "protein tyrosine phosphatase, non-receptor type 12" Ptpn12  
1450480\_a\_at 0.85520 G protein-coupled receptor kinase 6 Gprk6  
1450481\_at 0.98813 --- ---  
1450482\_a\_at 0.91309 paired-like homeodomain transcription factor 2 Pitx2  
1450483\_at 0.74183 gap junction membrane channel protein alpha 12 Gja12  
1450484\_a\_at 1.01347 thymidylate kinase family LPS-inducible member Tyki  
1450485\_at 0.92550 SRY-box containing gene 3 Sox3  
1450486\_a\_at 1.06536 opioid receptor-like 1 Oprl1  
1450487\_at 0.80650 visual system homeobox 1 homolog (zebrafish) Vsx1  
1450488\_at 0.92162 chemokine (C-C motif) ligand 24 Ccl24  
1450489\_at 0.92063 sal-like 1 (Drosophila) Sall1  
1450490\_at 0.97896 "potassium voltage-gated channel, shaker-related subfamily, member 7" Kcna7  
1450491\_at 0.89696 prostaglandin E receptor 1 (subtype EP1) Ptger1  
1450492\_at 0.95937 cyclic nucleotide gated channel beta 3 Cngb3  
1450493\_at 0.98713 KISS1 receptor Kiss1r  
1450494\_x\_at 0.97742 CEA-related cell adhesion molecule 1 Ceacam1  
1450495\_a\_at 1.07355 "killer cell lectin-like receptor subfamily K, member 1" Klrk1  
1450496\_a\_at 1.04954 RIKEN cDNA 2810433K01 gene 2810433K01Rik  
1450497\_at 0.96624 adenomatosis polyposis coli 2 Apc2  
1450498\_at 1.02233 "5,10-methylenetetrahydrofolate reductase" Mthfr  
1450499\_at 1.06167 ataxin 1 Atnx1  
1450500\_at 1.02412 U2AF homology motif (UHM) kinase 1 /// similar to U2AF homology motif (UHM) kinase 1 Uhmk1 /// LOC677213  
1450501\_at 1.52944 integrin alpha 2 Itga2  
1450502\_at 0.87665 dihydropyrimidinase-like 2 Dpysl2  
1450503\_at 0.94428 "potassium inwardly-rectifying channel, subfamily J, member 2" Kcnj2  
1450504\_a\_at 1.06269 1-acylglycerol-3-phosphate O-acyltransferase 3 Agpat3  
1450505\_a\_at 1.10369 RIKEN cDNA 1810015C04 gene 1810015C04Rik  
1450506\_a\_at 1.18463 interferon stimulated exonuclease gene 20-like 1 Isg20l1  
1450507\_at 0.97010 "POU domain, class 2, transcription factor 3" Pou2f3  
1450508\_at 0.85935 forkhead box N1 Foxn1  
1450509\_at 0.99964 carbohydrate sulfotransferase 11 Chst11  
1450510\_a\_at 0.87803 "calcium channel, voltage-dependent, P/Q type, alpha 1A subunit" Cacna1a  
1450511\_at 0.99907 "muscle, skeletal, receptor tyrosine kinase" Musk  
1450512\_at 0.80793 netrin 4 Ntn4  
1450513\_at 1.08403 CD33 antigen Cd33

1450514\_at 0.93139 zinc finger and SCAN domain containing 2 Zscan2  
 1450515\_at 0.95055 "potassium inwardly rectifying channel, subfamily J, member 11" Kcnj11  
 1450516\_a\_at 0.94717 "RAB17, member RAS oncogene family" Rab17  
 1450517\_at 1.20031 T-cell acute lymphocytic leukemia 2 Tal2  
 1450518\_at 0.99667 "hepatocyte nuclear factor 4, gamma" Hnf4g  
 1450519\_a\_at 0.91938 "protein kinase, cAMP dependent, catalytic, alpha" Prkaca  
 1450520\_at 0.98231 "calcium channel, voltage-dependent, gamma subunit 3" Cacng3  
 1450521\_a\_at 1.03012 "T-cell receptor gamma chain /// region containing T-cell receptor gamma  
 chain; T-cell receptor gamma, variable 4" Tcrp /// LOC670271  
 1450522\_a\_at 1.01744 "H1 histone family, member 0" H1f0  
 1450523\_at 0.92568 contactin 2 Cntn2  
 1450524\_at 1.03676 claudin 9 Cldn9  
 1450525\_at 0.86893 GLI-Kruppel family member GLI3 Gli3  
 1450526\_at 0.92278 "T-cell leukemia, homeobox 1" Tlx1  
 1450527\_at 1.12745 somatostatin receptor 1 Sstr1  
 1450528\_at 0.98963 "UDP-Gal:betaGlcNAc beta 1,3-galactosyltransferase, polypeptide 5"  
 B3galt5  
 1450529\_at 1.13791 "histocompatibility 2, M region locus 9" H2-M9  
 1450530\_at 1.06909 "UDP-Gal:betaGlcNAc beta 1,3-galactosyltransferase, polypeptide 1"  
 B3galt1  
 1450531\_at 1.05143 "histocompatibility 2, blastocyst" H2-B1  
 1450532\_at 0.88847 RIKEN cDNA 2310002J15 gene 2310002J15Rik  
 1450533\_a\_at 0.98197 pleiomorphic adenoma gene-like 1 Plagl1  
 1450534\_x\_at 1.18734 MHC (A.CA/J(H-2K-f) class I antigen LOC56628  
 1450535\_at 0.84774 keratin associated protein 12-1 Krtap12-1  
 1450536\_s\_at 0.95408 keratin associated protein 12-1 Krtap12-1  
 1450537\_at 1.04588 midline 2 Mid2  
 1450538\_s\_at 0.86621 "mast cell protease 9 /// chymase 2, mast cell" Mcpt9 /// Cma2  
 1450539\_at 1.04681 keratin associated protein 5-1 Krtap5-1  
 1450540\_x\_at 1.01237 keratin associated protein 5-1 Krtap5-1  
 1450541\_at 3.07357 plasmacytoma variant translocation 1 Pvt1  
 1450542\_s\_at 0.94755 "melanoma antigen, family A, 1 /// melanoma antigen, family A, 2 ///  
 melanoma antigen, family A, 3 /// melanoma antigen, family A, 5 /// melanoma antigen, family A, 6 ///  
 melanoma antigen, family A, 8 /// similar to melanoma antigen family A, 8" Magea1 /// Magea2 ///  
 Magea3 /// Magea5 /// Magea6 /// Magea8 /// LOC670799  
 1450543\_at 1.04278 myosin 1H Myo1h  
 1450544\_at 1.04906 "hypothetical protein, MNCb-4779" AB041550  
 1450545\_a\_at 0.93845 "deoxynucleotidyltransferase, terminal" Dntt  
 1450546\_at 1.07099 "Alport syndrome, mental retardation, midface hypoplasia and elliptocytosis  
 chromosomal region gene 1 homolog (human)" Ammcr1  
 1450547\_x\_at 1.09445 deubiquitinating enzyme 2 Dub2  
 1450548\_at 1.00324 5-hydroxytryptamine (serotonin) receptor 1F Htr1f  
 1450549\_s\_at 0.92703 "ELK4, member of ETS oncogene family" Elk4



1450550\_at 1.11424 interleukin 5 Il5  
1450551\_x\_at 1.00087 "killer cell lectin-like receptor, subfamily A, member 15" Klra15  
1450552\_at 0.97415 "ATPase, H+ transporting, lysosomal V1 subunit E2" Atp6v1e2  
1450553\_at 0.93574 homeo box D12 Hoxd12  
1450554\_at 1.01080 defensin beta 2 Defb2  
1450555\_at 0.99942 testis expressed gene 13 Tex13  
1450556\_at 0.78467 spectrin beta 1 Spnb1  
1450557\_at 0.91309 "sodium channel, voltage-gated, type IV, alpha" Scn4a  
1450558\_at 1.08916 "vomeronasal 1 receptor, A1" V1ra1  
1450559\_at 0.95435 RIKEN cDNA 5730559C18 gene 5730559C18Rik  
1450560\_a\_at 0.97441 "protein phosphatase 2, regulatory subunit B (B56), delta isoform" Ppp2r5d  
1450561\_a\_at 0.99543 surfeit gene 1 Surf1  
1450562\_at 1.17880 "lymphocyte antigen 6 complex, locus F" Ly6f  
1450563\_at 0.96465 microsomal glutathione S-transferase 3 Mgst3  
1450564\_x\_at 0.93213 interferon alpha 1 Ifna1  
1450565\_at 0.95713 interleukin 9 Il9  
1450566\_at 0.97190 interleukin 3 Il3  
1450567\_a\_at 0.88601 "procollagen, type II, alpha 1" Col2a1  
1450568\_at 1.09210 galanin receptor 1 Galr1  
1450569\_a\_at 1.04159 RNA binding motif protein 14 Rbm14  
1450570\_a\_at 0.97567 CD19 antigen Cd19  
1450571\_a\_at 1.01418 beaded filament structural protein in lens-CP94 Bfsp1  
1450572\_at 0.97906 "alkaline phosphatase 3, intestine, not Mn requiring" Akp3  
1450573\_at 1.03634 anti-Mullerian hormone Amh  
1450574\_at 1.05032 "cytochrome P450, family 11, subfamily b, polypeptide 2" Cyp11b2  
1450575\_at 1.03091 "cholinergic receptor, muscarinic 4" Chrm4  
1450576\_a\_at 0.99447 "splicing factor 3a, subunit 2" Sf3a2  
1450577\_at 0.95706 somatostatin receptor 3 Sstr3  
1450578\_at 1.13135 sex determining region of Chr Y Sry  
1450579\_x\_at 1.03370 sex determining region of Chr Y Sry  
1450580\_at 0.89058 G protein-coupled receptor 45 Gpr45  
1450581\_at 0.99376 galanin receptor 3 Galr3  
1450582\_at 1.18207 "histocompatibility 2, Q region locus 5" H2-Q5  
1450583\_s\_at 0.87450 formyl peptide receptor-like 1 Fprl1  
1450584\_at 0.95815 homeo box D11 Hoxd11  
1450585\_at 1.05998 "taste receptor, type 2, member 119" Tas2r119  
1450586\_at 0.92317 "bradykinin receptor, beta 1" Bdkrb1  
1450587\_at 0.88685 "histocompatibility 2, M region locus 10.1" H2-M10.1  
1450588\_at 1.06358 olfactory receptor 67 Olfr67  
1450589\_at 0.92620 olfactory receptor 749 Olfr749  
1450590\_at 1.05992 olfactory receptor 159 Olfr159  
1450591\_at 1.00810 olfactory receptor 154 Olfr154  
1450592\_at 1.11156 olfactory receptor 69 Olfr69

1450593\_at 0.87442 interferon alpha 6 Ifna6  
1450594\_at 0.89643 "melanoma antigen, family A, 4" Magea4  
1450595\_at 0.92764 "vomeronasal 1 receptor, C1" V1rc1  
1450596\_at 0.93896 olfactory receptor 66 Olfr66  
1450597\_at 0.97233 olfactory receptor 870 Olfr870  
1450598\_at 0.91966 "vomeronasal 1 receptor, A4" V1ra4  
1450599\_at 1.05630 "vomeronasal 1 receptor, B3" V1rb3  
1450600\_at 1.05147 olfactory receptor 1508 Olfr1508  
1450601\_at 1.07732 "vomeronasal 1 receptor, B8" V1rb8  
1450602\_at 1.06539 "vomeronasal 1 receptor, C7" V1rc7  
1450603\_s\_at 0.96299 "vomeronasal 1 receptor, A3 /// vomeronasal 1 receptor, A4" V1ra3 /// V1ra4  
1450604\_at 0.93375 olfactory receptor 140 Olfr140  
1450605\_at 0.93548 "taste receptor, type 2, member 108" Tas2r108  
1450606\_at 0.85252 phenylethanolamine-N-methyltransferase Pnmt  
1450607\_s\_at 0.98910 urocortin 2 Ucn2  
1450608\_at 1.00338 "histone 1, H1t" Hist1h1t  
1450609\_at 1.03542 lipocalin 8 Lcn8  
1450610\_at 0.94957 urocortin Ucn  
1450611\_at 0.96457 orosomucoid 3 Orm3  
1450612\_a\_at 0.88073 phosphatidylethanolamine N-methyltransferase Pemt  
1450613\_x\_at 0.90624 interferon alpha B Ifnab  
1450614\_x\_at 1.11187 interferon alpha 5 Ifna5  
1450615\_at 0.95404 "eosinophil-associated, ribonuclease A family, member 4" Ear4  
1450616\_at 0.87754 "eosinophil-associated, ribonuclease A family, member 5" Ear5  
1450617\_at 1.04869 --- ---  
1450618\_a\_at 1.09784 small proline-rich protein 2A Sprr2a  
1450619\_x\_at 0.93776 cell matrix adhesion regulator Cmar  
1450620\_at 1.08314 --- ---  
1450621\_a\_at 0.98243 "hemoglobin Y, beta-like embryonic chain" Hbb-y  
1450622\_at 1.05429 breast cancer anti-estrogen resistance 1 Bcar1  
1450623\_at 0.96791 "guanine nucleotide binding protein, beta 2" Gnb2  
1450624\_at 1.09663 betaine-homocysteine methyltransferase Bhmt  
1450625\_at 1.02547 "procollagen, type V, alpha 2" Col5a2  
1450626\_at 0.90707 "mannosidase, beta A, lysosomal" Manba  
1450627\_at 0.71929 progressive ankylosis Ank  
1450628\_at 1.06160 "solute carrier family 2, (facilitated glucose transporter), member 8" Slc2a8  
1450629\_at 0.90616 LIM domain and actin binding 1 Lima1  
1450630\_at 1.11461 queuine tRNA-ribosyltransferase 1 Qtrt1  
1450631\_x\_at 0.98292 "defensin related cryptdin 12 /// defensin related cryptdin 2 /// defensin related  
cryptdin 3 /// defensin related cryptdin 6 /// defensin related cryptdin 9 /// defensin related cryptdin 17 ///  
defensin related cryptdin 23 /// defensin related cryptdin 24 /// defensin, alpha, pseudogene 1"  
Defcr12 /// Defcr2 /// Defcr3 /// Defcr6 /// Defcr9 /// Defcr17 /// Defcr23 /// Defcr24 /// Defa-ps1  
1450632\_at 1.01822 similar to aplysia ras-related homolog A2 /// similar to aplysia ras-related

homolog A2 LOC433749 /// LOC631743  
 1450633\_at 0.97345 calmodulin 4 Calm4  
 1450634\_at 1.05348 "ATPase, H<sup>+</sup> transporting, lysosomal V1 subunit A" Atp6v1a  
 1450635\_at 0.78999 alkaline phosphatase 5 Akp5  
 1450636\_s\_at 0.95531 alkaline phosphatase 5 Akp5  
 1450637\_a\_at 0.95261 AE binding protein 1 Aebp1  
 1450638\_at 1.07005 programmed cell death 5 Pcd5  
 1450639\_at 0.99574 "solute carrier family 28 (sodium-coupled nucleoside transporter), member 2" ///  
 similar to solute carrier family 28 (sodium-coupled nucleoside transporter), member 2" Slc28a2 ///  
 LOC381417  
 1450640\_x\_at 0.83515 "ATP synthase, H<sup>+</sup> transporting, mitochondrial F1F0 complex, subunit e" Atp5k  
 1450641\_at 0.93679 vimentin Vim  
 1450642\_at 0.96224 RIKEN cDNA 3110001I20 gene 3110001I20Rik  
 1450643\_s\_at 0.99360 acyl-CoA synthetase long-chain family member 1 Acs11  
 1450644\_at 0.86189 "zinc finger protein 36, C3H type-like 1" Zfp3611  
 1450645\_at 0.84199 metallothionein 4 Mt4  
 1450646\_at 1.51140 "cytochrome P450, family 51" Cyp51  
 1450647\_at 1.14091 Hermansky-Pudlak syndrome 3 homolog (human) Hps3  
 1450648\_s\_at 0.99989 "histocompatibility 2, class II antigen A, beta 1" H2-Ab1  
 1450649\_at 0.86758 "guanine nucleotide binding protein (G protein), gamma 10" Gng10  
 1450650\_at 1.08325 myosin X Myo10  
 1450651\_at 0.91865 myosin X Myo10  
 1450652\_at 0.89583 cathepsin K Ctsk  
 1450653\_at 1.03766 spermatogenic Zip 1 Spz1  
 1450654\_a\_at 0.93611 dehydrolipoyl dihydrolipoyl synthase Dhdds  
 1450655\_at 0.90516 phosphatase and tensin homolog Pten  
 1450656\_at 1.01386 "guanine nucleotide binding protein, alpha 13" Gna13  
 1450657\_at 1.05661 peptidylprolyl isomerase E (cyclophilin E) Ppie  
 1450658\_at 0.90677 "a disintegrin-like and metalloproteinase (reprolysin type) with thrombospondin  
 type 1 motif, 5 (aggrecanase-2)" Adamts5  
 1450659\_at 0.83616 regulator of G protein signaling 7 Rgs7  
 1450660\_at 0.95089 6-pyruvoyl-tetrahydropterin synthase Pts  
 1450661\_x\_at 0.97004 nuclear factor I/C Nfic  
 1450662\_at 0.86843 testis specific protein kinase 1 Tesk1  
 1450663\_at 0.91644 thrombospondin 2 Thbs2  
 1450664\_at 0.96014 "GA repeat binding protein, alpha" Gabpa  
 1450665\_at 0.87699 "GA repeat binding protein, alpha" Gabpa  
 1450666\_s\_at 0.89223 ataxin 10 Atxn10  
 1450667\_a\_at 1.03402 citrate synthase Cs  
 1450668\_s\_at 1.10476 heat shock protein 1 (chaperonin 10) Hspe1  
 1450669\_at 0.85088 mitogen activated protein kinase kinase kinase 11 Map3k11  
 1450670\_at 0.95234 dopamine beta hydroxylase Dbh

1450671\_at 0.85043 "crystallin, beta A1" Cryba1  
1450672\_a\_at 0.94298 three prime repair exonuclease 1 Trex1  
1450673\_at 0.95418 "procollagen, type IX, alpha 2" Col9a2  
1450674\_at 0.93475 cyclin-dependent kinase 5 Cdk5  
1450675\_at 1.01271 stromal membrane-associated protein 1-like Smap11  
1450676\_at 0.95374 "transcription elongation factor B (SIII), polypeptide 3" Tceb3  
1450677\_at 0.91479 checkpoint kinase 1 homolog (S. pombe) Chek1  
1450678\_at 1.35948 integrin beta 2 Itgb2  
1450679\_at 1.02053 RIKEN cDNA 5730470L24 gene 5730470L24Rik  
1450680\_at 1.01688 recombination activating gene 1 Rag1  
1450681\_at 1.02337 zinc finger protein 143 Zfp143  
1450682\_at 0.93783 "fatty acid binding protein 6, ileal (gastrotropin)" Fabp6  
1450683\_at 1.08394 transgelin 3 Tagln3  
1450684\_at 0.98473 ets variant gene 1 Etv1  
1450685\_at 0.91350 cAMP-regulated phosphoprotein 19 Arpp19  
1450686\_at 1.01845 paraoxonase 2 Pon2  
1450687\_at 0.97135 insulin-like growth factor 2 mRNA binding protein 3 Igf2bp3  
1450688\_at 0.97031 ral guanine nucleotide dissociation stimulator-like 2 Rgl2  
1450689\_at 0.94876 "protease, serine, 3 /// protease, serine, 1 (trypsin 1) /// trypsinogen 10 ///  
trypsinogen 12" Prss3 /// Prss1 /// LOC436522 /// LOC436523  
1450690\_at 1.00971 --- ---  
1450691\_at 0.90515 cask-interacting protein 2 Caskin2  
1450692\_at 1.05833 kinesin family member 4 Kif4  
1450693\_at 1.00428 --- ---  
1450694\_at 1.04338 FK506 binding protein 2 Fkbp2  
1450695\_at 0.81916 aryl-hydrocarbon receptor Ahr  
1450696\_at 1.42983 "proteasome (prosome, macropain) subunit, beta type 9 (large multifunctional  
peptidase 2)" Psmb9  
1450697\_at 1.03745 "solute carrier family 30 (zinc transporter), member 7" Slc30a7  
1450698\_at 0.92904 dual specificity phosphatase 2 Dusp2  
1450699\_at 0.72724 selenium binding protein 1 Selenbp1  
1450700\_at 0.71179 CDC42 effector protein (Rho GTPase binding) 3 Cdc42ep3  
1450701\_a\_at 1.06992 "general transcription factor II H, polypeptide 2" Gtf2h2  
1450702\_at 0.90205 hemochromatosis Hfe  
1450703\_at 0.85518 "solute carrier family 7 (cationic amino acid transporter, y+ system), member  
2" Slc7a2  
1450704\_at 0.90621 Indian hedgehog Ihh  
1450705\_at 1.07209 RD RNA-binding protein Rdbp  
1450706\_a\_at 1.00769 ADP-ribosylation factor-like 3 Arl3  
1450707\_at 0.92633 "double C2, gamma" Doc2g  
1450708\_at 1.05265 secretogranin II Scg2  
1450709\_at 0.86032 defensin related cryptdin 5 Defcr5  
1450710\_at 0.95063 "jumonji, AT rich interactive domain 2" Jarid2

1450711\_at 1.07462 bromodomain containing 4 Brd4  
1450712\_at 1.13444 "potassium inwardly-rectifying channel, subfamily J, member 9" Kcnj9  
1450713\_at 1.05160 chondroitin sulfate proteoglycan 5 Cspg5  
1450714\_at 0.93448 antizyme inhibitor 1 Azin1  
1450715\_at 0.87012 "cytochrome P450, family 1, subfamily a, polypeptide 2" Cyp1a2  
1450716\_at 0.60719 "a disintegrin-like and metallopeptidase (reprolysin type) with thrombospondin type 1 motif, 1" Adamts1  
1450717\_at 0.92740 "angiogenin, ribonuclease A family, member 1" Ang1  
1450718\_at 1.01450 SH2B adaptor protein 2 Sh2b2  
1450719\_at 1.31637 meprin 1 alpha Mep1a  
1450720\_at 0.97487 "acid phosphatase 1, soluble" Acp1  
1450721\_at 1.05941 "acid phosphatase 1, soluble" Acp1  
1450722\_at 1.15561 nucleoporin 50 Nup50  
1450723\_at 0.98775 "ISL1 transcription factor, LIM/homeodomain" Isl1  
1450724\_at 1.03254 "down-regulated by Ctnnb1, a" Drctnnb1a  
1450725\_s\_at 0.95285 carbonic anhydrase 14 Car14  
1450726\_at 0.87653 N-acylsphingosine amidohydrolase 2 Asah2  
1450727\_a\_at 0.94301 "polymerase (DNA-directed), delta interacting protein 2" Poldip2  
1450728\_at 0.90742 four jointed box 1 (Drosophila) Fjx1  
1450729\_at 1.00265 heparan sulfate 2-O-sulfotransferase 1 Hs2st1  
1450730\_at 0.97191 heparan sulfate 2-O-sulfotransferase 1 Hs2st1  
1450731\_s\_at 1.08791 "tumor necrosis factor receptor superfamily, member 21" Tnfrsf21  
1450732\_a\_at 1.11887 bicaudal D homolog 2 (Drosophila) Bicd2  
1450733\_at 1.03425 bicaudal D homolog 2 (Drosophila) Bicd2  
1450734\_at 1.02808 leucine zipper transcription regulator 2 Lztr2  
1450735\_at 1.12124 RIKEN cDNA 1810003N24 gene 1810003N24Rik  
1450736\_a\_at 0.88600 "hemoglobin Z, beta-like embryonic chain" Hbb-bh1  
1450737\_at 1.00268 polymerase (RNA) III (DNA directed) polypeptide K Polr3k  
1450738\_at 1.17100 kinesin family member 21A Kif21a  
1450739\_at 0.88195 transducin (beta)-like 1X-linked receptor 1 Tbl1xr1  
1450740\_a\_at 0.96541 "microtubule-associated protein, RP/EB family, member 1" Mapre1  
1450741\_at 0.91955 staufer (RNA binding protein) homolog 1 (Drosophila) Stau1  
1450742\_at 0.95925 bystin-like Bysl  
1450743\_s\_at 0.97417 "synaptotagmin binding, cytoplasmic RNA interacting protein" Syncrip  
1450744\_at 0.74000 elongation factor RNA polymerase II 2 Ell2  
1450745\_at 0.88061 "core 1 UDP-galactose:N-acetylgalactosamine-alpha-R beta 1,3-galactosyltransferase" C1galt1  
1450746\_at 1.16098 kelch-like ECH-associated protein 1 Keap1  
1450747\_at 1.10640 kelch-like ECH-associated protein 1 Keap1  
1450748\_at 1.06131 "sphingomyelin phosphodiesterase 3, neutral" Smpd3  
1450749\_a\_at 1.02754 "nuclear receptor subfamily 4, group A, member 2" Nr4a2  
1450750\_a\_at 0.92184 "nuclear receptor subfamily 4, group A, member 2" Nr4a2  
1450751\_at 0.92607 zona pellucida binding protein Zpbp

1450752\_at 1.11489 "cytochrome c, testis" Cyct  
1450753\_at 1.01951 natural killer cell group 7 sequence Nkg7  
1450754\_at 0.95475 "similar to calcium channel, voltage-dependent, alpha 2/delta subunit 2"  
LOC669637  
1450755\_at 1.03144 "platelet-activating factor acetylhydrolase, isoform 1b, alpha2 subunit"  
Pafah1b2  
1450756\_s\_at 0.86636 cullin 3 Cul3  
1450757\_at 1.21918 cadherin 11 Cdh11  
1450758\_at 1.16491 contactin associated protein-like 2 Cntnap2  
1450759\_at 0.97990 bone morphogenetic protein 6 Bmp6  
1450760\_a\_at 0.90870 "inhibitor of growth family, member 3" Ing3  
1450761\_s\_at 1.08612 regulating synaptic membrane exocytosis 2 Rims2  
1450762\_s\_at 0.96490 zinc finger protein 191 Zfp191  
1450763\_x\_at 0.97978 wingless-related MMTV integration site 3 Wnt3  
1450764\_at 0.90321 acyloxyacyl hydrolase Aoah  
1450765\_a\_at 0.97302 "phosphodiesterase 6H, cGMP-specific, cone, gamma" Pde6h  
1450766\_at 1.12594 "phosphodiesterase 6H, cGMP-specific, cone, gamma" Pde6h  
1450767\_at 0.82343 "neural precursor cell expressed, developmentally down-regulated gene 9"  
Nedd9  
1450768\_at 1.08060 "discs, large homolog 1 (Drosophila)" Dlgh1  
1450769\_s\_at 0.81145 StAR-related lipid transfer (START) domain containing 5 Stard5  
1450770\_at 1.15194 RIKEN cDNA 3632451O06 gene 3632451O06Rik  
1450771\_at 0.97147 fucosyltransferase 9 Fut9  
1450772\_at 1.04469 wingless-related MMTV integration site 11 Wnt11  
1450773\_at 0.98262 "potassium voltage-gated channel, Shal-related family, member 2" Kcnd2  
1450774\_at 0.92926 "lymphocyte antigen 6 complex, locus G6D" Ly6g6d  
1450775\_at 0.92681 Moloney sarcoma oncogene Mos  
1450776\_at 0.95410 "1-acylglycerol-3-phosphate O-acyltransferase 6 (lysophosphatidic acid  
acyltransferase, zeta)" Agpat6  
1450777\_at 1.12375 5'-3' exoribonuclease 2 Xrn2  
1450778\_a\_at 1.07808 "RNA U, small nuclear RNA export adaptor" Rnuxa  
1450779\_at 0.98210 "fatty acid binding protein 7, brain" Fabp7  
1450780\_s\_at 1.10508 high mobility group AT-hook 2 Hmga2  
1450781\_at 1.17248 high mobility group AT-hook 2 Hmga2  
1450782\_at 0.86659 wingless-related MMTV integration site 4 Wnt4  
1450783\_at 1.46021 --- ---  
1450784\_at 0.76490 reversion-inducing-cysteine-rich protein with kazal motifs Reck  
1450785\_at 1.20789 thyroid hormone receptor interactor 4 Trip4  
1450786\_x\_at 0.90605 similar to PDZ and LIM domain protein 5 (Enigma homolog) (Enigma-like  
PDZ and LIM domains protein) LOC669660  
1450787\_at 1.00530 chloride channel 5 Clcn5  
1450788\_at 1.01012 serum amyloid A 1 Saa1  
1450789\_at 0.99883 "rhopilin, Rho GTPase binding protein 1" Rhpn1

1450790\_at 1.08643 thyroglobulin Tgn  
1450791\_at 0.99389 natriuretic peptide precursor type B Nppb  
1450792\_at 0.92075 TYRO protein tyrosine kinase binding protein Tyrobp  
1450793\_at 1.25923 RIKEN cDNA 4930550L24 gene 4930550L24Rik  
1450794\_at 0.86761 arginine vasopressin Avp  
1450795\_at 1.03113 luteinizing hormone beta Lhb  
1450796\_at 0.93427 atonal homolog 7 (Drosophila) Atoh7  
1450797\_a\_at 0.92261 chromobox homolog 1 (Drosophila HP1 beta) Cbx1  
1450798\_at 0.77284 tenascin XB Tnxb  
1450799\_at 1.16944 adenylate cyclase activating polypeptide 1 receptor 1 Adcyap1r1  
1450800\_at 1.00364 synaptotagmin VIII Syt8  
1450801\_at 0.85372 a disintegrin and metallopeptidase domain 21 Adam21  
1450802\_at 1.00254 "protease, serine, 28" Prss28  
1450803\_at 0.95418 neurotrophin 3 Ntf3  
1450804\_at 0.82190 kinesin family member 5C Kif5c  
1450805\_at 1.11041 "sarcoglycan, delta (dystrophin-associated glycoprotein)" Sgcd  
1450806\_at 0.98039 "T-cell leukemia, homeobox 3" Tlx3  
1450807\_at 0.92549 --- ---  
1450808\_at 1.07238 formyl peptide receptor 1 Fpr1  
1450809\_at 0.99604 seminal vesicle antigen-like 2 Sval2  
1450810\_at 1.08270 follicle stimulating hormone receptor Fshr  
1450811\_at 0.87034 small proline-rich protein 2J Sprr2j  
1450812\_at 0.98849 B-cell leukemia/lymphoma 2 related protein A1a /// B-cell leukemia/lymphoma  
2 related protein A1b /// B-cell leukemia/lymphoma 2 related protein A1c /// B-cell leukemia/lymphoma  
2 related protein A1d Bcl2a1a /// Bcl2a1b /// Bcl2a1c /// Bcl2a1d  
1450813\_a\_at 0.94556 "troponin I, skeletal, slow 1" Tnni1  
1450814\_a\_at 1.07002 importin 4 Ipo4  
1450815\_s\_at 0.98357 coiled-coil-helix-coiled-coil-helix domain containing 2 /// RIKEN cDNA  
2410018M08 gene Chchd2 /// 2410018M08Rik  
1450816\_at 1.00551 "polymerase (DNA directed), gamma 2, accessory subunit" Polg2  
1450817\_at 1.03175 small optic lobes homolog (Drosophila) Solh  
1450818\_a\_at 0.99551 "NADH dehydrogenase (ubiquinone) 1 alpha subcomplex, 7 (B14.5a)"  
Ndufa7  
1450819\_at 0.82233 poliovirus receptor-related 1 Pvr11  
1450820\_a\_at 0.91727 netrin G2 Ntng2  
1450821\_at 0.95869 p300/CBP-associated factor Pcaf  
1450822\_at 0.95664 P lysozyme structural Lzp-s  
1450823\_at 1.08604 OG9 homeobox gene Og9x  
1450824\_at 0.93524 patched homolog 1 Ptch1  
1450825\_at 1.04792 N-acylsphingosine amidohydrolase (alkaline ceramidase) 3 Asah3  
1450826\_a\_at 1.67497 serum amyloid A 3 Saa3  
1450827\_at 0.97853 kinesin family member 23 Kif23  
1450828\_at 1.13049 synaptopodin 2 Synpo2

1450829\_at 1.31974 "tumor necrosis factor, alpha-induced protein 3" Tnfaip3  
1450830\_a\_at 0.95323 "phosphodiesterase 6C, cGMP specific, cone, alpha prime" Pde6c  
1450831\_at 1.03777 "POU domain, class 3, transcription factor 2" Pou3f2  
1450832\_at 0.90903 homeo box C5 Hoxc5  
1450833\_at 0.89958 "cholinergic receptor, muscarinic 1, CNS" Chrm1  
1450834\_at 0.94483 fucosyltransferase 4 Fut4  
1450835\_a\_at 0.96576 glial cell line derived neurotrophic factor family receptor alpha 4 Gfra4  
1450836\_at 1.01436 neurogenin 1 Neurog1  
1450837\_at 1.14841 proline rich protein HaeIII subfamily 1 Prh1  
1450838\_x\_at 1.17186 ribosomal protein L37 /// similar to ribosomal protein L37 Rpl37 ///  
LOC383438  
1450839\_at 0.47617 "DNA segment, human D4S114" D0H4S114  
1450840\_a\_at 0.95192 ribosomal protein L39 Rpl39  
1450841\_at 1.12358 "STT3, subunit of the oligosaccharyltransferase complex, homolog A (S. cerevisiae)" Stt3a  
1450842\_a\_at 1.08540 centromere protein A Cenpa  
1450843\_a\_at 0.87286 "serine (or cysteine) peptidase inhibitor, clade H, member 1" Serpinh1  
1450844\_at 0.99837 syntaxin 6 Stx6  
1450845\_a\_at 1.11918 basic leucine zipper and W2 domains 1 Bzw1  
1450846\_at 1.09719 basic leucine zipper and W2 domains 1 Bzw1  
1450847\_at 0.93060 nuclear cap binding protein subunit 2 Ncbp2  
1450848\_at 0.98377 death associated protein 3 Dap3  
1450849\_at 1.09457 heterogeneous nuclear ribonucleoprotein U Hnrpu  
1450850\_at 1.00020 villin 2 Vil2  
1450851\_at 1.00101 WD repeat domain 1 Wdr1  
1450852\_s\_at 0.90059 coagulation factor II (thrombin) receptor F2r  
1450853\_at 0.87282 "transducin-like enhancer of split 4, homolog of Drosophila E(spl)" Tle4  
1450854\_at 1.03740 proliferation-associated 2G4 Pa2g4  
1450855\_at 0.75464 armadillo repeat gene deleted in velo-cardio-facial syndrome Arvcf  
1450856\_at 0.80210 armadillo repeat gene deleted in velo-cardio-facial syndrome Arvcf  
1450857\_a\_at 0.89369 "procollagen, type I, alpha 2" Colla2  
1450858\_a\_at 1.00397 "ubiquitin-conjugating enzyme E2D 3 (UBC4/5 homolog, yeast)" Ube2d3  
1450859\_s\_at 0.88200 "ubiquitin-conjugating enzyme E2D 3 (UBC4/5 homolog, yeast)" Ube2d3  
1450860\_at 1.00779 leucine aminopeptidase 3 Lap3  
1450861\_at 0.94018 "Fanconi anemia, complementation group C" FancC  
1450862\_at 0.92043 RAD54 like (S. cerevisiae) Rad54l  
1450863\_a\_at 0.76151 doublecortin and calcium/calmodulin-dependent protein kinase-like 1  
Dcamk1l  
1450864\_at 0.89601 calmodulin 3 Calm3  
1450865\_s\_at 1.00709 mitochondrial ribosomal protein S24 Mrps24  
1450866\_a\_at 1.08358 mitochondrial ribosomal protein L17 Mrpl17  
1450867\_at 1.04663 mitochondrial ribosomal protein L17 Mrpl17  
1450868\_at 0.94905 "DNA segment, Chr 8, ERATO Doi 354, expressed" D8ErtD354e



1450869\_at 0.52574 fibroblast growth factor 1 Fgf1  
1450870\_at 0.90444 v-ral simian leukemia viral oncogene homolog A (ras related) Rala  
1450871\_a\_at 1.01237 "branched chain aminotransferase 1, cytosolic" Bcat1  
1450872\_s\_at 0.92954 lysosomal acid lipase 1 Lip1  
1450873\_at 1.13019 GTP binding protein 4 Gtpbp4  
1450874\_at 1.05085 matrin 3 Matr3  
1450875\_at 0.91788 G protein-coupled receptor 37 Gpr37  
1450876\_at 0.99294 complement component factor h Cfh  
1450877\_at 0.96882 cDNA sequence BC005537 BC005537  
1450878\_at 0.97068 sorcin Sri  
1450879\_at 0.94211 "ATPas, class II, type 9B" Atp9b  
1450880\_at 1.07810 mitochondrial ribosomal protein L16 Mrpl16  
1450881\_s\_at 1.10005 G protein-coupled receptor 137B Gpr137b  
1450882\_s\_at 1.09476 G protein-coupled receptor 137B /// similar to transmembrane 7 superfamily member 1 /// similar to transmembrane 7 superfamily member 1 Gpr137b /// LOC664862 /// LOC673335  
1450883\_a\_at 0.98209 CD36 antigen Cd36  
1450884\_at 0.96557 CD36 antigen Cd36  
1450885\_at 1.18782 "DNA fragmentation factor, alpha subunit" Dffa  
1450886\_at 0.90618 germ cell-specific gene 2 Gsg2  
1450887\_at 1.08196 rcd1 (required for cell differentiation) homolog 1 (S. pombe) Rqcd1  
1450888\_at 1.09174 N-ethylmaleimide sensitive fusion protein attachment protein beta Napb  
1450889\_at 0.93583 "SWI/SNF related, matrix associated, actin dependent regulator of chromatin, subfamily a, member 3" Smarca3  
1450890\_a\_at 1.00484 abl-interactor 1 Abi1  
1450891\_at 1.01130 signal recognition particle 19 Srp19  
1450892\_a\_at 1.11169 ubiquitin specific peptidase 4 (proto-oncogene) Usp4  
1450893\_a\_at 0.95412 ubiquitin-associated protein 1 Ubap1  
1450894\_a\_at 0.98666 "adaptor protein complex AP-2, mu1" Ap2m1  
1450895\_a\_at 1.01776 RIKEN cDNA 1810020G14 gene 1810020G14Rik  
1450896\_at 0.89479 Rho GTPase activating protein 5 Arhgap5  
1450897\_at 0.92515 Rho GTPase activating protein 5 Arhgap5  
1450898\_at 1.01800 hippocampus abundant gene transcript 1 Hiat1  
1450899\_at 0.88978 "neural precursor cell expressed, developmentally down-regulated gene 1" Nedd1  
1450900\_at 1.15016 expressed sequence AW011752 AW011752  
1450901\_a\_at 1.18735 expressed sequence AW011752 AW011752  
1450902\_at 1.05471 bromodomain containing 3 Brd3  
1450903\_at 1.02924 RAD23b homolog (S. cerevisiae) Rad23b  
1450904\_at 0.97381 transmembrane protein 167 Tmem167  
1450905\_at 1.06649 plexin C1 Plxnc1  
1450906\_at 1.01902 plexin C1 Plxnc1  
1450907\_at 0.99950 signal peptidase complex subunit 2 homolog (S. cerevisiae) Spcs2

1450908\_at 1.09698 eukaryotic translation initiation factor 4E /// hypothetical LOC630527 Eif4e ///  
LOC630527  
1450909\_at 0.94203 eukaryotic translation initiation factor 4E Eif4e  
1450910\_at 0.87767 "CAP, adenylate cyclase-associated protein, 2 (yeast)" Cap2  
1450911\_at 0.97082 peptidylprolyl isomerase B Ppib  
1450912\_at 1.04132 "membrane-spanning 4-domains, subfamily A, member 1" Ms4a1  
1450913\_at 1.01120 "UDP-Gal:betaGlcNAc beta 1,4-galactosyltransferase, polypeptide 6 /// similar  
to Beta-1,4-galactosyltransferase 6 (Beta-1,4-GalTase 6) (Beta4Gal-T6) (b4Gal-T6) (UDP-galactose:  
beta-N-acetylglucosamine beta-1,4-galactosyltransferase 6) (UDP-Gal:beta-GlcNAc beta-1,4-  
galactosyltransferase 6)" B4galt6 /// LOC675709  
1450914\_at 0.97786 "protein phosphatase 1, regulatory (inhibitor) subunit 14B" Ppp1r14b  
1450915\_at 0.75666 "adaptor-related protein complex 3, beta 1 subunit" Ap3b1  
1450916\_at 1.05746 staufer (RNA binding protein) homolog 2 (Drosophila) Stau2  
1450917\_at 1.80086 myomesin 2 Myom2  
1450918\_s\_at 0.93484 Rous sarcoma oncogene Src  
1450919\_at 0.88982 "membrane protein, palmitoylated" Mpp1  
1450920\_at 1.05328 cyclin B2 Ccnb2  
1450921\_at 0.92062 aprataxin Aptx  
1450922\_a\_at 0.84453 "transforming growth factor, beta 2" Tgfb2  
1450923\_at 0.85767 "transforming growth factor, beta 2" Tgfb2  
1450924\_at 1.07189 "hepatoma-derived growth factor, related protein 3" Hdgfrp3  
1450925\_a\_at 1.01343 ribosomal protein S27-like /// similar to 40S ribosomal protein S27-like  
protein Rps271 /// LOC667571  
1450926\_at 1.06284 "ATPase, H+ transporting, lysosomal V1 subunit G1 /// similar to vacuolar H+  
ATPase G1 /// similar to vacuolar H+ ATPase G1" Atp6v1g1 /// LOC623391 /// LOC671155  
1450927\_at 0.81522 "leucine-zipper-like transcriptional regulator, 1" Lztr1  
1450928\_at 0.61529 inhibitor of DNA binding 4 Id4  
1450929\_at 0.86877 zinc finger protein 57 Zfp57  
1450930\_at 0.95999 hippocalcin Hpca  
1450931\_at 0.84380 dedicator of cytokinesis 9 /// similar to Dedicator of cytokinesis protein 9  
(Cdc42 guanine nucleotide exchange factor zizimin 1) Dock9 /// LOC670309  
1450932\_s\_at 1.07581 dedicator of cytokinesis 9 /// similar to Dedicator of cytokinesis protein 9  
(Cdc42 guanine nucleotide exchange factor zizimin 1) Dock9 /// LOC670309  
1450933\_at 1.11772 phosphodiesterase 7A Pde7a  
1450934\_at 0.86575 eukaryotic translation initiation factor 4A2 Eif4a2  
1450935\_at 1.01529 "excision repair cross-complementing rodent repair deficiency,  
complementation group 5" Ercc5  
1450936\_a\_at 0.99502 deoxyribonuclease 1-like 2 Dnase1l2  
1450937\_at 0.88536 lin-7 homolog C (C. elegans) Lin7c  
1450938\_at 0.87438 --- ---  
1450939\_at 1.00300 ectonucleoside triphosphate diphosphohydrolase 1 Entpd1  
1450940\_at 0.96891 ganglioside-induced differentiation-associated-protein 1 Gdap1  
1450941\_at 0.98517 --- ---

|              |         |                                                                                                                                                      |                              |
|--------------|---------|------------------------------------------------------------------------------------------------------------------------------------------------------|------------------------------|
| 1450942_at   | 0.82854 | coiled-coil domain containing 16                                                                                                                     | Ccdc16                       |
| 1450943_at   | 1.00600 | RIKEN cDNA 2010012C16 gene                                                                                                                           | 2010012C16Rik                |
| 1450944_at   | 0.75681 | chondroitin sulfate proteoglycan 4                                                                                                                   | Cspg4                        |
| 1450945_at   | 0.94068 | "protein kinase C, alpha"                                                                                                                            | Prkca                        |
| 1450946_at   | 0.98967 | neural retina leucine zipper gene                                                                                                                    | Nrl                          |
| 1450947_at   | 0.96659 | RIKEN cDNA 2610528J11 gene                                                                                                                           | 2610528J11Rik                |
| 1450948_a_at | 1.05262 | mitochondrial ribosomal protein L1                                                                                                                   | Mrpl1                        |
| 1450949_at   | 1.06461 | katanin p60 (ATPase-containing) subunit A1                                                                                                           | Katna1                       |
| 1450950_at   | 1.08798 | structural maintenace of chromosomes 3                                                                                                               | Smc3                         |
| 1450951_at   | 1.12435 | structural maintenace of chromosomes 3                                                                                                               | Smc3                         |
| 1450952_at   | 1.10830 | phospholamban                                                                                                                                        | Pln                          |
| 1450953_at   | 1.00999 | WD repeat domain 39                                                                                                                                  | Wdr39                        |
| 1450954_at   | 0.80582 | YME1-like 1 ( <i>S. cerevisiae</i> )                                                                                                                 | Yme1l1                       |
| 1450955_s_at | 0.82102 | sortilin 1                                                                                                                                           | Sort1                        |
| 1450956_at   | 0.98005 | stearoyl-coenzyme A desaturase 3                                                                                                                     | Scd3                         |
| 1450957_a_at | 1.03086 | sequestosome 1                                                                                                                                       | Sqstm1                       |
| 1450958_at   | 0.83787 | transmembrane 4 superfamily member 1                                                                                                                 | Tm4sf1                       |
| 1450959_at   | 1.04867 | RIKEN cDNA D930014E17 gene                                                                                                                           | D930014E17Rik                |
| 1450960_at   | 1.02011 | insulin-like growth factor binding protein-like 1                                                                                                    | Igfbp1                       |
| 1450961_a_at | 1.06814 | transcription elongation factor A (SII)-like 6 /// transcription elongation factor A (SII)-like 5 /// transcription elongation factor A (SII)-like 3 | Tceal6 /// Tceal5 /// Tceal3 |
| 1450962_at   | 1.02768 | pyruvate dehydrogenase E1 alpha 2                                                                                                                    | Pdha2                        |
| 1450963_at   | 1.00284 | heterogeneous nuclear ribonucleoprotein F                                                                                                            | Hnrpf                        |
| 1450964_a_at | 1.02262 | oxysterol binding protein-like 9                                                                                                                     | Osbpl9                       |
| 1450965_at   | 1.05884 | testis expressed gene 261                                                                                                                            | Tex261                       |
| 1450966_at   | 0.91561 | carnitine O-octanoyltransferase                                                                                                                      | Crot                         |
| 1450967_at   | 0.86457 | protein tyrosine phosphatase-like A domain containing 2                                                                                              | Ptplad2                      |
| 1450968_at   | 0.95012 | "ubiquinol-cytochrome c reductase, Rieske iron-sulfur polypeptide 1"                                                                                 | Uqcrcfs1                     |
| 1450969_at   | 0.97671 | "propionyl Coenzyme A carboxylase, beta polypeptide"                                                                                                 | Pccb                         |
| 1450970_at   | 1.03444 | "glutamate oxaloacetate transaminase 1, soluble"                                                                                                     | Got1                         |
| 1450971_at   | 1.03857 | growth arrest and DNA-damage-inducible 45 beta                                                                                                       | Gadd45b                      |
| 1450972_at   | 1.09226 | RIKEN cDNA 3110040N11 gene                                                                                                                           | 3110040N11Rik                |
| 1450973_s_at | 0.76827 | mitogen activated protein kinase binding protein 1                                                                                                   | Mapkbp1                      |
| 1450974_at   | 1.07573 | tissue inhibitor of metalloproteinase 4                                                                                                              | Timp4                        |
| 1450975_at   | 0.92321 | "calcium channel, voltage-dependent, gamma subunit 4"                                                                                                | Cacng4                       |
| 1450976_at   | 1.05639 | N-myc downstream regulated gene 1                                                                                                                    | Ndrg1                        |
| 1450977_s_at | 0.96764 | N-myc downstream regulated gene 1 /// N-myc downstream regulated-like                                                                                | Ndrg1 /// Ndr1               |
| 1450978_at   | 1.10763 | "dishevelled, dsh homolog 1 ( <i>Drosophila</i> )"                                                                                                   | Dvl1                         |
| 1450979_at   | 1.02116 | CEA-related cell adhesion molecule 14                                                                                                                | Ceacam14                     |
| 1450980_at   | 0.91176 | GTP binding protein 3                                                                                                                                | Gtpbp3                       |
| 1450981_at   | 0.95790 | calponin 2                                                                                                                                           | Cnn2                         |
| 1450982_at   | 0.84537 | "solute carrier family 9 (sodium/hydrogen exchanger), isoform 3 regulator 1"                                                                         |                              |

Slc9a3r1

1450983\_at 1.11017 A kinase (PRKA) anchor protein 8 Akap8

1450984\_at 0.91610 tight junction protein 2 Tjp2

1450985\_a\_at 0.89757 tight junction protein 2 Tjp2

1450986\_at 1.12937 nucleolar protein 5 Nol5

1450987\_a\_at 0.97948 RIKEN cDNA 2310004I24 gene 2310004I24Rik

1450988\_at 1.08645 leucine rich repeat containing G protein coupled receptor 5 Lgr5

1450989\_at 1.06596 teratocarcinoma-derived growth factor TdGF1

1450990\_at 0.97517 glypican 3 Gpc3

1450991\_at 0.92137 "DnaJ (Hsp40) homolog, subfamily B, member 7" Dnajb7

1450992\_a\_at 0.99978 myeloid ecotropic viral integration site 1 Meis1

1450993\_at 0.98695 PAS domain containing serine/threonine kinase Pask

1450994\_at 0.96800 Rho-associated coiled-coil containing protein kinase 1 Rock1

1450995\_at 0.90617 folate receptor 1 (adult) Folr1

1450996\_at 0.94954 follicle stimulating hormone beta Fshb

1450997\_at 0.88028 serine/threonine kinase 17b (apoptosis-inducing) Stk17b

1450998\_at 0.90641 zinc finger protein 110 Zfp110

1450999\_a\_at 0.92655 RIKEN cDNA 1700029H14 gene 1700029H14Rik

1451000\_at 1.07092 transmembrane protein 126A Tmem126a

1451001\_at 0.93533 RIKEN cDNA 1700019N19 gene 1700019N19Rik

1451002\_at 0.87896 "aconitase 2, mitochondrial" Aco2

1451003\_at 1.02751 mitogen-activated protein kinase kinase kinase 7 interacting protein 2

Map3k7ip2

1451004\_at 0.92536 activin receptor IIA Acvr2a

1451005\_at 1.06442 SMT3 suppressor of mif two 3 homolog 1 (yeast) Sumo1

1451006\_at 1.69564 xanthine dehydrogenase Xdh

1451007\_at 0.80508 cyclin M2 Cnnm2

1451008\_at 0.91545 "ST8 alpha-N-acetyl-neuraminidase alpha-2,8-sialyltransferase 3" St8sia3

1451009\_at 0.92307 ring finger protein 151 Rnf151

1451010\_at 1.03524 nucleolar protein 11 Nol11

1451011\_at 0.89247 zinc finger protein 358 Zfp358

1451012\_a\_at 1.08511 cold shock domain protein A CSDA

1451013\_at 1.09883 "solute carrier family 29 (nucleoside transporters), member 3" Slc29a3

1451014\_at 0.75470 receptor tyrosine kinase-like orphan receptor 1 Ror1

1451015\_at 0.96303 transketolase Tkt

1451016\_at 1.13261 interferon-related developmental regulator 2 Ifrd2

1451017\_at 0.97340 ERGIC and golgi 3 Ergic3

1451018\_at 0.95902 leptin receptor overlapping transcript-like 1 Leprotl1

1451019\_at 0.90812 cathepsin F Ctsf

1451020\_at 1.00657 glycogen synthase kinase 3 beta Gsk3b

1451021\_a\_at 1.08363 Kruppel-like factor 5 Klf5

1451022\_at 0.88657 low density lipoprotein receptor-related protein 6 Lrp6

1451023\_at 0.97053 "hyperpolarization-activated, cyclic nucleotide-gated K+ 3" Hcn3

|              |                                                                              |               |
|--------------|------------------------------------------------------------------------------|---------------|
| 1451024_at   | 0.93323 "endothelial differentiation, G-protein-coupled receptor 6"          | Edg6          |
| 1451025_at   | 0.98701 ADP-ribosylation factor-like 1                                       | Arl1          |
| 1451026_at   | 1.05832 FtsJ homolog 3 (E. coli)                                             | Ftsj3         |
| 1451027_at   | 0.99938 brain-specific angiogenesis inhibitor 1-associated protein 2         | Baiap2        |
| 1451028_at   | 1.00603 brain-specific angiogenesis inhibitor 1-associated protein 2         | Baiap2        |
| 1451029_at   | 1.32137 Bcl2-like 2                                                          | Bcl2l2        |
| 1451030_at   | 0.92861 "aldo-keto reductase family 1, member C21"                           | Akr1c21       |
| 1451031_at   | 0.91888 secreted frizzled-related sequence protein 4                         | Sfrp4         |
| 1451032_at   | 1.03877 four and a half LIM domains 4                                        | Fhl4          |
| 1451033_a_at | 1.00795 "transient receptor potential cation channel, subfamily C, member 4" | Trpc4         |
| 1451034_at   | 0.87583 "zinc finger protein 36, C3H type-like 2"                            | Zfp36l2       |
| 1451035_a_at | 0.96679 "aldo-keto reductase family 1, member A4 (aldehyde reductase)"       | Akr1a4        |
| 1451036_at   | 1.04732 spastic paraplegia 21 homolog (human)                                | Spg21         |
| 1451037_at   | 1.05529 "protein tyrosine phosphatase, non-receptor type 9"                  | Ptpn9         |
| 1451038_at   | 0.91961 apelin                                                               | Apln          |
| 1451039_at   | 1.14340 RIKEN cDNA 2610027L16 gene                                           | 2610027L16Rik |
| 1451040_at   | 1.04903 histidyl tRNA synthetase 2                                           | Hars2         |
| 1451041_at   | 1.06685 Rho-associated coiled-coil containing protein kinase 2               | Rock2         |
| 1451042_a_at | 1.05844 myc induced nuclear antigen                                          | Mina          |
| 1451043_at   | 1.08153 NIMA (never in mitosis gene a)-related expressed kinase 6            | Nek6          |
| 1451044_at   | 0.85295 survivor of motor neuron protein interacting protein 1               | Sip1          |
| 1451045_at   | 0.95973 synaptotagmin XIII                                                   | Syt13         |
| 1451046_at   | 0.93965 "zinc finger protein, multitype 1"                                   | Zfpm1         |
| 1451047_at   | 1.11498 integral membrane protein 2A                                         | Itm2a         |
| 1451048_at   | 0.93212 methionine aminopeptidase 2                                          | Metap2        |
| 1451049_at   | 1.00257 B-cell receptor-associated protein 31                                | Bcap31        |
| 1451050_at   | 1.11139 "5'-nucleotidase, cytosolic III"                                     | Nt5c3         |
| 1451051_a_at | 0.99987 SCY1-like 1 (S. cerevisiae)                                          | Scyl1         |
| 1451052_at   | 0.95270 component of oligomeric golgi complex 8                              | Cog8          |
| 1451053_a_at | 1.05172 transformed mouse 3T3 cell double minute 1                           | Mdm1          |
| 1451054_at   | 0.97697 orosomucoid 1                                                        | Orm1          |
| 1451055_at   | 0.93853 "solute carrier family 45, member 2"                                 | Slc45a2       |
| 1451056_at   | 1.12949 "proteasome (prosome, macropain) 26S subunit, non-ATPase, 7"         | Psmd7         |
| 1451057_x_at | 0.99013 dynamin 2                                                            | Dnm2          |
| 1451058_at   | 1.15367 malignant T cell amplified sequence 2                                | Mcts2         |
| 1451059_at   | 1.02706 zinc finger protein 474                                              | Zfp474        |
| 1451060_at   | 0.89585 G protein-coupled receptor 146                                       | Gpr146        |
| 1451061_at   | 0.97508 RIKEN cDNA 1700018B24 gene                                           | 1700018B24Rik |
| 1451062_a_at | 0.91717 peroxin 2                                                            | Pex2          |
| 1451063_at   | 0.90746 syntaxin binding protein 4                                           | Stxbp4        |
| 1451064_a_at | 1.16636 phosphoserine aminotransferase 1                                     | Psat1         |
| 1451065_a_at | 1.10887 DEAD (Asp-Glu-Ala-Asp) box polypeptide 39                            | Ddx39         |
| 1451066_at   | 0.86657 leukocyte receptor cluster (LRC) member 4                            | Leng4         |

1451067\_at 0.99482 "small glutamine-rich tetratricopeptide repeat (TPR)-containing, alpha" Sgta  
 1451068\_s\_at 1.17325 ribosomal protein S25 Rps25  
 1451069\_at 1.11415 proviral integration site 3 Pim3  
 1451070\_at 0.96940 guanosine diphosphate (GDP) dissociation inhibitor 1 Gdi1  
 1451071\_a\_at 0.85218 "ATPase, Na+/K+ transporting, alpha 1 polypeptide" Atp1a1  
 1451072\_a\_at 1.02288 ring finger protein 4 Rnf4  
 1451073\_at 0.89671 signal peptide peptidase 3 Spp13  
 1451074\_at 0.90556 ring finger protein 13 Rnf13  
 1451075\_s\_at 1.00963 "CTD (carboxy-terminal domain, RNA polymerase II, polypeptide A) small phosphatase 2" Ctdsp2  
 1451076\_s\_at 1.12802 dendritic cell protein GA17 Ga17  
 1451077\_at 1.04889 ribosomal protein L5 /// similar to 60S ribosomal protein L5 Rpl5 /// LOC382740 /// LOC665407 /// LOC668032 /// LOC672748 /// LOC675821  
 1451078\_at 0.95837 RIKEN cDNA 2510039O18 gene 2510039O18Rik  
 1451079\_at 1.01700 ADP-dependent glucokinase Adpgk  
 1451080\_at 0.97634 ubiquitin specific peptidase 1 Usp1  
 1451081\_a\_at 0.95588 transcription factor 25 (basic helix-loop-helix) Tcf25  
 1451082\_at 1.07866 RIKEN cDNA 1300018I05 gene 1300018I05Rik  
 1451083\_s\_at 1.06212 alanyl-tRNA synthetase Aars  
 1451084\_at 0.92677 "electron transferring flavoprotein, dehydrogenase" Etfdh  
 1451085\_at 0.99225 RIKEN cDNA C030006K11 gene C030006K11Rik  
 1451086\_s\_at 0.92650 RAS-related C3 botulinum substrate 1 Rac1  
 1451087\_at 1.07754 WD repeat domain 36 Wdr36  
 1451088\_a\_at 0.96613 oxidase assembly 1-like Oxa11  
 1451089\_a\_at 1.00424 archain 1 Arcn1  
 1451090\_a\_at 1.09859 "eukaryotic translation initiation factor 2, subunit 3, structural gene X-linked" Eif2s3x  
 1451091\_at 0.89754 thioredoxin domain containing 5 Txndc5  
 1451092\_a\_at 0.92602 RAN GTPase activating protein 1 Rangap1  
 1451093\_at 0.98947 polymerase (RNA) II (DNA directed) polypeptide E Polr2e  
 1451094\_at 0.94713 gamma-glutamyltransferase-like 3 Ggtl3  
 1451095\_at 1.12110 asparagine synthetase Asns  
 1451096\_at 0.98776 NADH dehydrogenase (ubiquinone) Fe-S protein 2 Ndufs2  
 1451097\_at 0.90601 vasodilator-stimulated phosphoprotein Vasp  
 1451098\_at 0.91259 procollagen (type III) N-endopeptidase Pcoln3  
 1451099\_at 0.86832 membrane bound C2 domain containing protein Mbc2  
 1451100\_a\_at 1.04079 carnitine deficiency-associated gene expressed in ventricle 3 Cdv3  
 1451101\_a\_at 0.93254 ribosomal protein S28 Rps28  
 1451102\_at 0.97070 "CCR4-NOT transcription complex, subunit 8" Cnot8  
 1451103\_at 0.88696 "DNA segment, Chr 14, ERATO Doi 500, expressed" D14Ertd500e  
 1451104\_a\_at 1.06148 U1 small nuclear ribonucleoprotein polypeptide A Snrp70

1451105\_at 1.00672 vasohibin 2 Wash2  
1451106\_at 1.24137 RNA binding motif protein 21 Rbm21  
1451107\_at 0.92563 "TBC1 domain family, member 22a" Tbc1d22a  
1451108\_at 0.96463 ring finger protein 185 Rnf185  
1451109\_a\_at 0.91306 "neural precursor cell expressed, developmentally down-regulated gene 4"  
Nedd4  
1451110\_at 1.01157 EGL nine homolog 1 (C. elegans) Egl1  
1451111\_at 1.09233 nucleoporin 133 Nup133  
1451112\_s\_at 0.98002 death-associated protein Dap  
1451113\_a\_at 0.99880 IK cytokine Ik  
1451114\_at 0.99382 CKLF-like MARVEL transmembrane domain containing 6 Cmtm6  
1451115\_at 0.89333 protein inhibitor of activated STAT 3 Pias3  
1451116\_at 0.95728 acetoacetyl-CoA synthetase Aacs  
1451117\_a\_at 0.96507 target of myb1-like 1 (chicken) Tom111  
1451118\_a\_at 0.95762 RIKEN cDNA 2410018C17 gene 2410018C17Rik  
1451119\_a\_at 0.70570 fibulin 1 Fbln1  
1451120\_at 1.08599 RNA polymerase 1-3 Rpo1-3  
1451121\_a\_at 0.97187 glioma tumor suppressor candidate region gene 2 Gltscr2  
1451122\_at 1.47530 isopentenyl-diphosphate delta isomerase Idi1  
1451123\_at 1.14395 RIKEN cDNA C330016O10 gene C330016O10Rik  
1451124\_at 1.10962 "superoxide dismutase 1, soluble" Sod1  
1451125\_at 0.94368 cDNA sequence BC017133 BC017133  
1451126\_at 0.95422 MAF1 homolog (S. cerevisiae) Maf1  
1451127\_at 1.02624 expressed sequence AW146242 AW146242  
1451128\_s\_at 1.05530 kinesin family member 22 Kif22  
1451129\_at 0.86664 calbindin 2 Calb2  
1451130\_at 1.03066 RIKEN cDNA 2010315L10 gene 2010315L10Rik  
1451131\_at 0.98238 ADP-ribosylation factor-like 6 interacting protein 1 Arl6ip1  
1451132\_at 0.80621 pre-B-cell leukemia transcription factor interacting protein 1 Pbxip1  
1451133\_s\_at 0.89260 transmembrane protein 168 Tmem168  
1451134\_a\_at 0.85359 TM2 domain containing 2 Tm2d2  
1451135\_at 0.99950 general transcription factor IIB Gtf2b  
1451136\_a\_at 1.05983 "eukaryotic translation initiation factor 2B, subunit 2 beta" Eif2b2  
1451137\_a\_at 1.01030 bromodomain containing 8 Brd8  
1451138\_x\_at 0.97205 "mesoderm induction early response 1, family member 2" Mier2  
1451139\_at 2.22427 "solute carrier family 39 (zinc transporter), member 4" Slc39a4  
1451140\_s\_at 0.91636 "protein kinase, AMP-activated, gamma 2 non-catalytic subunit" Prkag2  
1451141\_at 1.00753 methyltransferase like 8 Mettl8  
1451142\_at 1.04588 exocyst complex component 1 Exoc1  
1451143\_at 1.05002 RIKEN cDNA 1110006G06 gene 1110006G06Rik  
1451144\_at 1.10883 brix domain containing 2 Bxdc2  
1451145\_s\_at 0.90419 transmembrane protein 111 Tmem111  
1451146\_at 0.94338 zinc finger protein 386 (Kruppel-like) /// similar to zinc finger protein 386

(Kruppel-like) isoform a Zfp386 /// LOC676952

1451147\_x\_at 0.72880 "cold shock domain containing C2, RNA binding" Csdc2

1451148\_at 0.88793 PTEN induced putative kinase 1 Pink1

1451149\_at 1.16758 phosphoglucomutase 2 Pgm2

1451150\_at 0.92185 zinc finger protein 410 Zfp410

1451151\_s\_at 0.92204 zinc finger protein 410 Zfp410

1451152\_a\_at 0.75240 "ATPase, Na+/K+ transporting, beta 1 polypeptide" Atp1b1

1451153\_a\_at 0.89891 cysteine and histidine rich 1 Cyhr1

1451154\_a\_at 1.03023 "CUG triplet repeat, RNA binding protein 2" Cugbp2

1451155\_at 0.94343 "CUG triplet repeat, RNA binding protein 2" Cugbp2

1451156\_s\_at 0.82816 very low density lipoprotein receptor Vldlr

1451157\_at 1.01521 ring finger protein 187 Rnf187

1451158\_at 0.90450 thyroid hormone receptor interactor 12 Trip12

1451159\_at 0.88063 Rho guanine nucleotide exchange factor (GEF) 12 Arhgef12

1451160\_s\_at 1.20664 poliovirus receptor Pvr

1451161\_a\_at 1.03425 "EGF-like module containing, mucin-like, hormone receptor-like sequence 1" Emr1

1451162\_at 0.98300 heat shock factor binding protein 1 Hsbp1

1451163\_at 0.99626 Terf1 (TRF1)-interacting nuclear factor 2 Tinf2

1451164\_a\_at 1.13739 mitochondrial ribosomal protein S18B Mrps18b

1451165\_at 1.00524 limb region 1 like Lmbr1l

1451166\_a\_at 1.12163 coiled-coil domain containing 101 Ccdc101

1451167\_at 1.07838 coiled-coil domain containing 101 Ccdc101

1451168\_a\_at 1.05950 Rho GDP dissociation inhibitor (GDI) alpha Arhgdia

1451169\_at 1.07747 nodal modulator 1 Nomo1

1451170\_s\_at 1.00593 nodal modulator 1 Nomo1

1451171\_at 1.07303 RIKEN cDNA 2310008H04 gene 2310008H04Rik

1451172\_at 0.86903 RIKEN cDNA 1200015A19 gene 1200015A19Rik

1451173\_at 0.91188 leucine rich repeat containing 49 Lrrc49

1451174\_at 1.00222 leucine rich repeat containing 33 Lrrc33

1451175\_at 0.94537 signal peptidase complex subunit 3 homolog (S. cerevisiae) Spcs3

1451176\_at 0.84585 RIKEN cDNA D430028G21 gene D430028G21Rik

1451177\_at 0.81098 "DnaJ (Hsp40) homolog, subfamily B, member 4" Dnajb4

1451178\_at 1.03540 mitochondrial ribosomal protein L53 Mrpl53

1451179\_a\_at 0.94502 quaking Qk

1451180\_a\_at 0.99646 "5'-nucleotidase, cytosolic III-like" Nt5c3l

1451181\_at 0.93069 transmembrane protein 121 Tmem121

1451182\_s\_at 0.95744 ankyrin repeat domain 54 Ankrd54

1451183\_at 1.17284 myosin head domain containing 1 Myohd1

1451184\_at 1.16567 heterogeneous nuclear ribonucleoprotein A3 /// similar to heterogeneous nuclear ribonucleoprotein A3 /// similar to heterogeneous nuclear ribonucleoprotein A3 /// similar to heterogeneous nuclear ribonucleoprotein A3 /// hypothetical protein LOC630677 /// similar to heterogeneous nuclear ribonucleoprotein A3 ///



similar to heterogeneous nuclear ribonucleoprotein A3 /// similar to heterogeneous nuclear ribonucleoprotein A3 /// similar to heterogeneous nuclear ribonucleoprotein A3 /// similar to heterogeneous nuclear ribonucleoprotein A3 Hnrpa3 /// LOC545592 /// LOC627828 /// LOC629025 /// LOC630401 /// LOC630677 /// LOC664907 /// LOC668131 /// LOC668559 /// LOC669450 /// LOC674254

1451185\_at 1.07223 "splicing factor 3b, subunit 5" Sf3b5  
 1451186\_at 1.12528 interferon stimulated exonuclease gene 20-like 1 Isg2011  
 1451187\_at 0.99370 RIKEN cDNA 0610037P05 gene 0610037P05Rik  
 1451188\_at 1.01028 WD repeat domain 26 Wdr26  
 1451189\_at 1.05088 "zinc finger, SWIM domain containing 1" Zswim1  
 1451190\_a\_at 0.72737 SH3-binding kinase 1 Sbk1  
 1451191\_at 0.99833 cellular retinoic acid binding protein II Crabp2  
 1451192\_a\_at 0.96729 tetratricopeptide repeat domain 4 Ttc4  
 1451193\_x\_at 1.02027 tetratricopeptide repeat domain 4 Ttc4  
 1451194\_at 1.10157 "aldolase 2, B isoform" Aldob  
 1451195\_a\_at 0.89210 thioredoxin domain containing 1 Txndc1  
 1451196\_at 0.85645 yippee-like 5 (Drosophila) Ypel5  
 1451197\_s\_at 1.04599 GATA zinc finger domain containing 2A Gatad2a  
 1451198\_at 0.98610 GATA zinc finger domain containing 2A Gatad2a  
 1451199\_at 1.04844 queuine tRNA-ribosyltransferase domain containing 1 Qtrtd1  
 1451200\_at 0.89337 kinesin family member 1B Kif1b  
 1451201\_s\_at 1.15389 ribonuclease/angiogenin inhibitor 1 Rnh1  
 1451202\_at 1.03592 RIKEN cDNA C330007P06 gene C330007P06Rik  
 1451203\_at 1.03965 myoglobin Mb  
 1451204\_at 1.06886 "scavenger receptor class A, member 5 (putative)" Scara5  
 1451205\_at 1.04497 "proteasome (prosome, macropain) subunit, beta type 4" Psmb4  
 1451206\_s\_at 0.78814 "pleckstrin homology, Sec7 and coiled-coil domains, binding protein" Pscdbp  
 1451207\_at 0.97815 calcium binding atopy-related autoantigen 1 Cbara1  
 1451208\_at 1.12994 eukaryotic translation termination factor 1 Etf1  
 1451209\_at 0.92590 longevity assurance homolog 5 (S. cerevisiae) Lass5  
 1451210\_at 1.04243 phosphatidic acid phosphatase type 2c Ppap2c  
 1451211\_a\_at 0.94057 ligatin Lgtn  
 1451212\_at 0.96130 coiled-coil domain containing 21 Ccdc21  
 1451213\_at 0.92342 peroxisomal biogenesis factor 11b Pex11b  
 1451214\_at 0.96906 kelch repeat and BTB (POZ) domain containing 2 Kbtbd2  
 1451215\_at 0.82330 --- ---  
 1451216\_at 1.02358 zinc finger protein 330 Zfp330  
 1451217\_a\_at 0.89485 IMP1 inner mitochondrial membrane peptidase-like (S. cerevisiae) Immp11  
 1451218\_at 0.96166 "ER degradation enhancer, mannosidase alpha-like 1" Edem1  
 1451219\_at 0.93644 ORM1-like 1 (S. cerevisiae) Ormdl1  
 1451220\_at 1.07161 RIKEN cDNA 2310040A13 gene 2310040A13Rik  
 1451221\_at 0.94922 cDNA sequence BC018507 BC018507  
 1451222\_at 0.86016 basic transcription factor 3-like 4 Btf3l4

1451223\_a\_at 1.01014 basic transcription factor 3-like 4 Btf3l4  
1451224\_at 0.98224 secretory carrier membrane protein 5 Scamp5  
1451225\_at 0.99429 "protein tyrosine phosphatase, non-receptor type 11" Ptpn11  
1451226\_at 0.84977 peroxisomal biogenesis factor 6 Pex6  
1451227\_a\_at 0.88363 "solute carrier family 10 (sodium/bile acid cotransporter family), member 3" Slc10a3  
1451228\_a\_at 0.96143 syncollin Syncn  
1451229\_at 0.64768 histone deacetylase 11 Hdac11  
1451230\_a\_at 0.93764 WW domain binding protein 5 Wbp5  
1451231\_a\_at 1.01410 cullin 2 Cul2  
1451232\_at 0.90429 CD151 antigen Cd151  
1451233\_at 1.12946 Tnf receptor-associated factor 2 Traf2  
1451234\_at 1.00546 cDNA sequence BC021381 BC021381  
1451235\_at 0.97085 cell cycle exit and neuronal differentiation 1 Cend1  
1451236\_at 0.97164 "RAS-like, estrogen-regulated, growth-inhibitor" Rerg  
1451237\_s\_at 0.89067 RNA binding motif protein 7 Rbm7  
1451238\_at 0.88484 RIKEN cDNA 1200003C05 gene 1200003C05Rik  
1451239\_a\_at 0.97377 "solute carrier family 26 (sulfate transporter), member 1" Slc26a1  
1451240\_a\_at 0.96867 glyoxalase 1 Glo1  
1451241\_at 0.88209 laminin B1 subunit 1 Lamb1-1  
1451242\_a\_at 0.89927 "protein phosphatase 5, catalytic subunit" Ppp5c  
1451243\_at 1.07625 arginyl aminopeptidase (aminopeptidase B) Rnpep  
1451244\_a\_at 0.85081 zinc finger protein 422 Zfp422  
1451245\_at 0.90787 leucine rich repeat containing 3B Lrrc3b  
1451246\_s\_at 1.03388 aurora kinase B Aurkb  
1451247\_at 1.08204 major facilitator superfamily domain containing 1 Mfsd1  
1451248\_at 1.06587 protein arginine N-methyltransferase 7 Prmt7  
1451249\_at 1.05767 TRM1 tRNA methyltransferase 1 homolog (S. cerevisiae) Trmt1  
1451250\_at 0.85608 G protein-regulated inducer of neurite outgrowth 1 Gprin1  
1451251\_at 1.08660 amyloid beta precursor protein (cytoplasmic tail) binding protein 2 Appbp2  
1451252\_at 0.96506 interferon regulatory factor 2 binding protein 1 Irf2bp1  
1451253\_at 0.94897 PX domain containing serine/threonine kinase Pxx  
1451254\_at 1.06788 "inhibitor of kappa light polypeptide enhancer in B-cells, kinase complex-associated protein" Ikbkap  
1451255\_at 0.82944 lipolysis stimulated lipoprotein receptor Lsr  
1451256\_at 1.00843 G protein-coupled receptor 172B Gpr172b  
1451257\_at 1.07228 acyl-CoA synthetase long-chain family member 6 Acsl6  
1451258\_at 1.02884 prostate stem cell antigen Psca  
1451259\_at 0.98668 "REX2, RNA exonuclease 2 homolog (S. cerevisiae)" Rexo2  
1451260\_at 0.95731 "aldehyde dehydrogenase 1 family, member B1" Aldh1b1  
1451261\_s\_at 0.98836 expressed sequence AW049765 AW049765  
1451262\_a\_at 1.21279 JTV1 gene Jtv1  
1451263\_a\_at 0.99235 "fatty acid binding protein 4, adipocyte" Fabp4

1451264\_at 1.05196 FERM domain containing 6 Frmd6  
1451265\_at 1.12583 coiled-coil domain containing 115 Ccdc115  
1451266\_at 1.04641 mitochondrial ribosomal protein L50 Mrpl50  
1451267\_at 0.95978 SHANK-associated RH domain interacting protein Sharpin  
1451268\_at 0.97521 translocation associated membrane protein 1-like 1 Tram111  
1451269\_at 0.99569 PDZ domain containing 11 Pdzd11  
1451270\_at 1.10040 dual specificity phosphatase 18 Dusp18  
1451271\_a\_at 0.90549 acetyl-Coenzyme A acetyltransferase 1 Acat1  
1451272\_a\_at 1.14349 ubiquitin-conjugating enzyme E2F (putative) Ube2f  
1451273\_x\_at 0.97447 cDNA sequence BC025546 BC025546  
1451274\_at 0.90379 oxoglutarate dehydrogenase (lipoamide) Ogdh  
1451275\_at 0.96365 RIKEN cDNA E030041M21 gene E030041M21Rik  
1451276\_at 0.92515 RIKEN cDNA E030041M21 gene E030041M21Rik  
1451277\_at 1.11645 "zinc binding alcohol dehydrogenase, domain containing 2" Zadh2  
1451278\_a\_at 1.05285 RIKEN cDNA 2610205E22 gene 2610205E22Rik  
1451279\_at 1.00022 ELKS/RAB6-interacting/CAST family member 1 Erc1  
1451280\_at 0.81556 "cyclic AMP-regulated phosphoprotein, 21" Arpp21  
1451281\_at 1.06715 zinc finger protein 96 Zfp96  
1451282\_at 1.06982 "centaurin, delta 3" Centd3  
1451283\_at 1.16636 RIKEN cDNA 1810073G14 gene 1810073G14Rik  
1451284\_at 0.91022 "Yip1 domain family, member 3" Yipf3  
1451285\_at 1.08188 "fusion, derived from t(12;16) malignant liposarcoma (human)" Fus  
1451286\_s\_at 1.05254 "fusion, derived from t(12;16) malignant liposarcoma (human)" Fus  
1451287\_s\_at 1.02487 RIKEN cDNA 2810003C17 gene 2810003C17Rik  
1451288\_s\_at 0.88946 RIKEN cDNA 1810043G02 gene 1810043G02Rik  
1451289\_at 1.30975 doublecortin and calcium/calmodulin-dependent protein kinase-like 1  
Dcamk1l  
1451290\_at 0.83911 microtubule-associated protein 1 light chain 3 alpha Map1lc3a  
1451291\_at 1.10627 oligonucleotide/oligosaccharide-binding fold containing 2B Obfc2b  
1451292\_at 0.92355 Zinc finger protein 212 Zfp212  
1451293\_at 1.05083 "RNA, U3 small nucleolar interacting protein 2" Rnu3ip2  
1451294\_s\_at 1.05963 small nuclear ribonucleoprotein E Snrpe  
1451295\_a\_at 0.96022 chromodomain helicase DNA binding protein 4 Chd4  
1451296\_x\_at 1.06903 "poly A binding protein, cytoplasmic 4 /// similar to Poly(A) binding protein,  
cytoplasmic 4, isoform 1" Pabpc4 /// LOC432881  
1451297\_at 1.10657 gulonolactone (L-) oxidase Gulo  
1451298\_at 0.91705 "pleckstrin homology domain containing, family H (with MyTH4 domain)  
member 3" Plekhh3  
1451299\_at 1.06823 "protein kinase, X-linked" Prkx  
1451300\_a\_at 0.99809 "CHMP family, member 7" Chmp7  
1451301\_at 1.02722 tropomodulin 2 Tmod2  
1451302\_at 1.00768 RIKEN cDNA 1110012L19 gene 1110012L19Rik  
1451303\_at 0.95682 cDNA sequence BC002230 BC002230

1451304\_at 1.05978 transmembrane protein 143 Tmem143  
1451305\_at 0.92621 "PKD2 interactor, golgi and endoplasmic reticulum associated 1" Pgea1  
1451306\_at 0.85617 cell division cycle associated 7 like Cdca7l  
1451307\_at 1.05627 mitochondrial ribosomal protein L14 Mrpl14  
1451308\_at 1.01387 "elongation of very long chain fatty acids (FEN1/Elo2, SUR4/Elo3, yeast)-like 4" Elovl4  
1451309\_at 0.87715 Rho GTPase activating protein 1 Arhgap1  
1451310\_a\_at 0.87662 cathepsin L Ctsl  
1451311\_a\_at 0.86203 adiponectin receptor 1 Adipor1  
1451312\_at 0.95734 NADH dehydrogenase (ubiquinone) Fe-S protein 7 Ndufs7  
1451313\_a\_at 0.91814 RIKEN cDNA 1110067D22 gene 1110067D22Rik  
1451314\_a\_at 1.30748 vascular cell adhesion molecule 1 Vcam1  
1451315\_at 1.09538 transmembrane protein 101 Tmem101  
1451316\_a\_at 0.94577 phosphatidylinositol binding clathrin assembly protein Picalm  
1451317\_at 0.97010 YTH domain family 2 Ythdf2  
1451318\_a\_at 1.13964 Yamaguchi sarcoma viral (v-yes-1) oncogene homolog /// similar to Yamaguchi sarcoma viral (v-yes-1) oncogene homolog Lyn /// LOC676654  
1451319\_at 1.04354 SUMO1/sentrin specific peptidase 1 Senp1  
1451320\_at 0.97269 RIKEN cDNA 3110043J09 gene 3110043J09Rik  
1451321\_a\_at 0.96376 RIKEN cDNA 0610033I05 gene 0610033I05Rik  
1451322\_at 0.78641 RIKEN cDNA 2310016A09 gene 2310016A09Rik  
1451323\_at 1.15525 zinc finger protein 7 Zfp7  
1451324\_s\_at 1.00369 forty-two-three domain containing 1 Fyttd1  
1451325\_at 0.88063 forty-two-three domain containing 1 Fyttd1  
1451326\_at 0.99160 abhydrolase domain containing 14b Abhd14b  
1451327\_a\_at 1.01987 transmembrane emp24 domain containing 1 Tmed1  
1451328\_at 0.96721 pecanex-like 3 (Drosophila) Pcnx3  
1451329\_at 1.06082 nudix (nucleoside diphosphate linked moiety X)-type motif 22 Nudt22  
1451330\_a\_at 1.00228 inositol polyphosphate-5-phosphatase B Inpp5b  
1451331\_at 0.90871 "protein phosphatase 1, regulatory (inhibitor) subunit 1B" Ppp1r1b  
1451332\_at 0.99629 zinc finger protein 521 Zfp521  
1451333\_a\_at 1.17988 proacrosin binding protein Acrbp  
1451334\_at 0.97941 RIKEN cDNA 1810009O10 gene 1810009O10Rik  
1451335\_at 1.05645 placenta-specific 8 Plac8  
1451336\_at 1.07518 "lectin, galactose binding, soluble 4" Lgals4  
1451337\_at 0.96846 "proteasome (prosome, macropain) inhibitor subunit 1" Psmf1  
1451338\_at 1.18915 nischarin Nisch  
1451339\_at 1.04142 sulfite oxidase Suox  
1451340\_at 0.94760 AT rich interactive domain 5A (Mrf1 like) Arid5a  
1451341\_s\_at 1.03530 RIKEN cDNA 1700003N22 gene /// expressed sequence AI840826 1700003N22Rik /// AI840826  
1451342\_at 1.09074 "spondin 1, (f-spondin) extracellular matrix protein" Spon1  
1451343\_at 1.04520 vacuolar protein sorting 36 (yeast) Vps36

1451344\_at 0.84404 transmembrane protein 119 Tmem119  
1451345\_at 1.02273 methylthioadenosine phosphorylase Mtap  
1451346\_at 0.97906 methylthioadenosine phosphorylase Mtap  
1451347\_at 0.98563 coiled-coil domain containing 95 Ccdc95  
1451348\_at 0.84747 DEP domain containing 6 Depdc6  
1451349\_at 0.93528 cDNA sequence BC020077 BC020077  
1451350\_a\_at 0.87127 leptin receptor overlapping transcript Leprot  
1451351\_at 0.91739 tetratricopeptide repeat domain 13 Ttc13  
1451352\_s\_at 0.94819 metastasis associated 3 Mta3  
1451353\_at 1.10222 transmembrane 6 superfamily member 1 Tm6sf1  
1451354\_at 1.05256 FAD-dependent oxidoreductase domain containing 1 Foxred1  
1451355\_at 0.95775 N-acylsphingosine amidohydrolase 3-like Asah3l  
1451356\_at 0.98929 "acidic (leucine-rich) nuclear phosphoprotein 32 family, member E" Anp32e  
1451357\_at 0.99272 RIKEN cDNA E130307M08 gene E130307M08Rik  
1451358\_a\_at 0.95588 Rac GTPase-activating protein 1 Racgap1  
1451359\_at 0.99751 acyltransferase like 2 Ayt12  
1451360\_at 1.10542 ERGIC and golgi 2 Ergic2  
1451361\_a\_at 1.04822 patatin-like phospholipase domain containing 7 Pnpla7  
1451362\_at 0.89191 "RAB7, member RAS oncogene family-like 1" Rab7l1  
1451363\_a\_at 0.96325 DENN/MADD domain containing 2D Dennd2d  
1451364\_at 0.95476 polymerase (RNA) III (DNA directed) polypeptide G like Polr3gl  
1451365\_at 1.03288 RNA binding motif protein 19 Rbm19  
1451366\_at 1.04239 "COP9 (constitutive photomorphogenic) homolog, subunit 6 (Arabidopsis thaliana)" Cops6  
1451367\_at 0.87425 "COP9 (constitutive photomorphogenic) homolog, subunit 6 (Arabidopsis thaliana)" Cops6  
1451368\_at 1.02109 "asparagine-linked glycosylation 1 homolog (yeast, beta-1,4-mannosyltransferase)" Alg1  
1451369\_at 0.95406 COMM domain containing 5 Commd5  
1451370\_at 1.01232 hypothetical protein LOC622403 LOC622404  
1451371\_at 0.99881 melanocortin 2 receptor accessory protein Mrap  
1451372\_a\_at 1.03255 ADP-ribosyltransferase 1 Art1  
1451373\_at 0.94396 "UDP glycosyltransferases 3 family, polypeptide A1 /// similar to UDP glycosyltransferases 3 family, polypeptide A1" Ugt3a1 /// LOC666512  
1451374\_x\_at 0.97829 chemokine-like factor Cklf  
1451375\_at 1.11947 ets homologous factor Ehf  
1451376\_at 1.11956 RIKEN cDNA 5730596K20 gene 5730596K20Rik  
1451377\_a\_at 0.98645 "achalasia, adrenocortical insufficiency, alacrimia" Aaas  
1451378\_at 1.04000 "UTP6, small subunit (SSU) processome component, homolog (yeast)" Utp6  
1451379\_at 1.05495 "RAB22A, member RAS oncogene family" Rab22a  
1451380\_at 0.94489 "zinc finger, FYVE domain containing 19" Zfyve19  
1451381\_at 0.86100 RIKEN cDNA 1810020D17 gene 1810020D17Rik  
1451382\_at 0.91524 "ChaC, cation transport regulator-like 1 (E. coli)" Chac1

1451383\_a\_at 1.18700 conserved helix-loop-helix ubiquitous kinase Chuk  
1451384\_at 0.93290 jumonji domain containing 5 Jmjd5  
1451385\_at 1.23835 RIKEN cDNA 2310056P07 gene 2310056P07Rik  
1451386\_at 1.05835 biliverdin reductase B (flavin reductase (NADPH)) Blvrb  
1451387\_s\_at 1.08555 cutA divalent cation tolerance homolog (E. coli) Cuta  
1451388\_a\_at 0.99137 "ATPase, Class VI, type 11B" Atp11b  
1451389\_at 1.11855 "zinc finger, CSL-type containing 3" Zcs13  
1451390\_s\_at 0.98048 "zinc finger, AN1 type domain 2B" Zfand2b  
1451391\_at 1.07972 RIKEN cDNA 2700050L05 gene 2700050L05Rik  
1451392\_at 0.94910 RNA binding motif and ELMO domain 1 Rbed1  
1451393\_at 1.00382 peroxisome biogenesis factor 26 Pex26  
1451394\_at 0.95015 dipeptidylpeptidase 6 Dpp6  
1451395\_at 0.95614 coiled-coil domain containing 92 Ccdc92  
1451396\_at 1.02811 protein-O-mannosyltransferase 2 Pomt2  
1451397\_at 1.06050 --- ---  
1451398\_at 1.02824 carbonyl reductase 4 Cbr4  
1451399\_at 0.94902 paroxysmal nonkinesinogenic dyskinesia Pnkd  
1451400\_at 1.09318 cDNA sequence BC023488 BC023488  
1451401\_a\_at 0.94734 RIKEN cDNA 0610009K11 gene 0610009K11Rik  
1451402\_at 1.01150 ecdysoneless homolog (Drosophila) Ecd  
1451403\_at 1.05132 cDNA sequence BC024868 BC024868  
1451404\_at 1.06608 open reading frame 19 ORF19  
1451405\_at 0.94464 "propionyl-Coenzyme A carboxylase, alpha polypeptide" Pcca  
1451406\_a\_at 0.98470 proprotein convertase subtilisin/kexin type 5 Pcsk5  
1451407\_at 0.87872 junction adhesion molecule 4 Jam4  
1451408\_at 1.04404 TruB pseudouridine (psi) synthase homolog 2 (E. coli) Trub2  
1451409\_at 0.96159 RIKEN cDNA 2210021J22 gene 2210021J22Rik  
1451410\_a\_at 0.94877 cysteine-rich protein 3 Crip3  
1451411\_at 0.86658 "G protein-coupled receptor, family C, group 5, member B" Gprc5b  
1451412\_a\_at 1.00466 intraflagellar transport 20 homolog (Chlamydomonas) Ift20  
1451413\_at 0.94669 calpastatin Cast  
1451414\_at 0.99596 "DNA segment, Chr 13, Wayne State University 177, expressed" D13Wsu177e  
1451415\_at 1.41143 RIKEN cDNA 1810011O10 gene 1810011O10Rik  
1451416\_a\_at 1.03542 "transglutaminase 1, K polypeptide" Tgm1  
1451417\_at 0.90409 breast cancer 1 Brca1  
1451418\_a\_at 0.80788 splA/ryanodine receptor domain and SOCS box containing 4 Spsb4  
1451419\_at 0.75726 splA/ryanodine receptor domain and SOCS box containing 4 Spsb4  
1451420\_at 0.87231 RIKEN cDNA 2610204L23 gene 2610204L23Rik  
1451421\_a\_at 0.92059 rogdi homolog (Drosophila) Rogdi  
1451422\_at 0.93546 myosin XVIIIa Myo18a  
1451423\_at 0.83845 tubulin-specific chaperone c Tbcc  
1451424\_at 0.88369 "gamma-aminobutyric acid (GABA-A) receptor, pi" Gabrp  
1451425\_a\_at 1.01788 "makorin, ring finger protein, 1" Mkrn1

1451426\_at 0.98721 "DNA segment, Chr 11, Lothar Hennighausen 2, expressed" D11Lgp2e  
 1451427\_a\_at 1.00094 EGF-like domain 7 Egfl7  
 1451428\_x\_at 0.97035 EGF-like domain 7 Egfl7  
 1451429\_at 0.98017 glucose-fructose oxidoreductase domain containing 2 Gfod2  
 1451430\_at 0.94418 slit homolog 2 (Drosophila) Slit2  
 1451431\_a\_at 0.97403 dysbindin (dystrobrevin binding protein 1) domain containing 2 Dbnidd2  
 1451432\_x\_at 0.85942 "alkB, alkylation repair homolog 4 (E. coli)" Alkbh4  
 1451433\_at 1.03251 major facilitator superfamily domain containing 3 Mfsd3  
 1451434\_s\_at 1.08941 RIKEN cDNA 5430405G24 gene 5430405G24Rik  
 1451435\_at 0.79225 cut-like 1 (Drosophila) Cutl1  
 1451436\_at 1.11046 "sno, strawberry notch homolog 1 (Drosophila)" Sbno1  
 1451437\_at 1.09483 "zinc finger, DHHC domain containing 20" Zdhhc20  
 1451438\_s\_at 1.02284 "C-type lectin domain family 2, member h" Clec2h  
 1451439\_at 1.12289 cDNA sequence BC027231 BC027231  
 1451440\_at 1.03066 chondrolectin Chodl  
 1451441\_at 1.04536 RIKEN cDNA 2210415F13 gene 2210415F13Rik  
 1451442\_at 1.03990 coiled-coil domain containing 104 Ccdc104  
 1451443\_at 1.09379 nuclear factor I/X Nfix  
 1451444\_s\_at 1.01120 RIKEN cDNA 2700008B19 gene 2700008B19Rik  
 1451445\_at 0.93052 uridine monophosphate synthetase Umps  
 1451446\_at 0.74579 anthrax toxin receptor 1 Antxr1  
 1451447\_at 1.03773 CUE domain containing 1 Cuedc1  
 1451448\_a\_at 0.95787 RIKEN cDNA 1110005A03 gene 1110005A03Rik  
 1451449\_at 0.98776 RIKEN cDNA 4933407N01 gene 4933407N01Rik  
 1451450\_at 0.63478 RIKEN cDNA 2010011I20 gene 2010011I20Rik  
 1451451\_at 0.79250 grancalcin Gca  
 1451452\_a\_at 0.83313 regulator of G-protein signaling 16 Rgs16  
 1451453\_at 1.04971 death-associated kinase 2 Dapk2  
 1451454\_at 0.97854 protocadherin 20 Pcdh20  
 1451455\_at 0.98281 cDNA sequence BC051244 BC051244  
 1451456\_at 1.27048 RIKEN cDNA 6430706D22 gene 6430706D22Rik  
 1451457\_at 1.50269 "sterol-C5-desaturase (fungal ERG3, delta-5-desaturase) homolog (S. cerevisiae)" Sc5d  
 1451458\_at 1.17617 transmembrane protein 2 Tmem2  
 1451459\_at 1.10288 AT hook containing transcription factor 1 Ahctf1  
 1451460\_a\_at 0.98517 "solute carrier family 22 (organic anion transporter), member 7" Slc22a7  
 1451461\_a\_at 1.46468 "aldolase 3, C isoform" Aldoc  
 1451462\_a\_at 1.02881 interferon (alpha and beta) receptor 2 Ifnar2  
 1451463\_at 0.99324 Rho GTPase activating protein 8 Arhgap8  
 1451464\_at 0.94628 microfibrillar-associated protein 3 Mfap3  
 1451465\_at 0.92601 ubiquitin-like 7 (bone marrow stromal cell-derived) Ubl7  
 1451466\_at 1.08672 "DNA segment, Chr 16, ERATO Doi 472, expressed" D16Ertd472e  
 1451467\_s\_at 0.94213 GTP binding protein 5 Gtpbp5

1451468\_s\_at 1.16248 exportin 5 Xpo5  
1451469\_at 0.85936 RIKEN cDNA D530005L17 gene D530005L17Rik  
1451470\_s\_at 1.14929 eukaryotic translation initiation factor 5A Eif5a  
1451471\_at 0.94623 RIKEN cDNA 3230401I01 gene 3230401I01Rik  
1451472\_at 0.94095 RIKEN cDNA 3230401I01 gene 3230401I01Rik  
1451473\_a\_at 0.98477 "crystallin, zeta (quinone reductase)-like 1" Cryz11  
1451474\_a\_at 1.09774 "poly (ADP-ribose) polymerase family, member 8" Parp8  
1451475\_at 0.90389 Plexin D1 Plxd1  
1451476\_at 1.01328 "zinc finger, DHHC domain containing 8" Zdhhc8  
1451477\_at 0.93033 RIKEN cDNA 1700029I01 gene 1700029I01Rik  
1451478\_at 1.16929 angiopoietin-like 7 Angptl7  
1451479\_a\_at 0.70457 transmembrane protein 53 Tmem53  
1451480\_at 1.07598 E2F transcription factor 4 E2f4  
1451481\_s\_at 0.94545 organic solute transporter alpha Osta  
1451482\_at 0.88909 cDNA sequence BC027344 BC027344  
1451483\_s\_at 0.99620 RIKEN cDNA 1700054N08 gene 1700054N08Rik  
1451484\_a\_at 0.85036 synapsin I Syn1  
1451485\_at 0.97481 RIKEN cDNA 3300001P08 gene 3300001P08Rik  
1451486\_at 0.85534 RIKEN cDNA 1200006F02 gene 1200006F02Rik  
1451487\_at 1.05661 Rab9 effector protein with kelch motifs Rabepk  
1451488\_at 0.89893 RIKEN cDNA 1110028A07 gene 1110028A07Rik  
1451489\_at 0.97070 "solute carrier family 25, member 35" Slc25a35  
1451490\_at 0.85318 lysophospholipase-like 1 Lyplal1  
1451491\_at 0.93386 RIKEN cDNA 4930556P03 gene 4930556P03Rik  
1451492\_at 0.86567 Src-like-adaptor 2 Sla2  
1451493\_at 0.82002 Nedd4 family interacting protein 1 Ndfip1  
1451494\_at 0.96165 WW domain containing adaptor with coiled-coil Wac  
1451495\_at 0.93338 WW domain containing adaptor with coiled-coil Wac  
1451496\_at 1.05691 metastasis suppressor 1 Mtss1  
1451497\_at 1.07161 "casein kinase 1, alpha 1" Csnk1a1  
1451498\_at 0.90398 cDNA sequence BC004853 BC004853  
1451499\_at 1.07404 Ca<sup>2+</sup>-dependent activator protein for secretion 2 Cadps2  
1451500\_at 1.04168 Usher syndrome 1C binding protein 1 Ushbp1  
1451501\_a\_at 0.62568 growth hormone receptor Ghr  
1451502\_at 0.92443 "phospholipase A2, group X" Pla2g10  
1451503\_at 1.01958 nucleolar protein 3 (apoptosis repressor with CARD domain) Nol3  
1451504\_at 1.01045 coiled-coil-helix-coiled-coil-helix domain containing 3 Chchd3  
1451505\_at 0.94683 coiled-coil-helix-coiled-coil-helix domain containing 5 Chchd5  
1451506\_at 1.03674 myocyte enhancer factor 2C Mef2c  
1451507\_at 0.92077 myocyte enhancer factor 2C Mef2c  
1451508\_at 0.99604 RIKEN cDNA 1700108L22 gene 1700108L22Rik  
1451509\_at 1.01445 "TAF9 RNA polymerase II, TATA box binding protein (TBP)-associated factor" Taf9



1451510\_s\_at 1.03005 oleoyl-ACP hydrolase Olah  
1451511\_at 1.00266 3-hydroxyisobutyryl-Coenzyme A hydrolase Hibch  
1451512\_s\_at 0.95743 3-hydroxyisobutyryl-Coenzyme A hydrolase Hibch  
1451513\_x\_at 0.94786 "serine (or cysteine) peptidase inhibitor, clade A, member 1a /// serine (or cysteine) preptidase inhibitor, clade A, member 1b" Serpina1a /// Serpina1b  
1451514\_at 1.06495 ubiquitin specific peptidase 43 Usp43  
1451515\_s\_at 1.01938 glycine-N-acyltransferase Glyat  
1451516\_at 1.02609 Ras homolog enriched in brain like 1 Rheb1  
1451517\_at 0.99606 Rho-related BTB domain containing 2 Rhobtb2  
1451518\_at 1.00644 zinc finger protein 709 Zfp709  
1451519\_at 0.91583 ring finger protein 2 Rnf2  
1451520\_at 1.02567 --- ---  
1451521\_x\_at 0.95984 Williams-Beuren syndrome chromosome region 1 homolog (human) Wbscr1  
1451522\_s\_at 1.02360 leucine-rich repeats and calponin homology (CH) domain containing 4 Lrch4  
1451523\_a\_at 0.94535 MIF4G domain containing Mif4gd  
1451524\_at 1.06697 F-box and WD-40 domain protein 2 Fbxw2  
1451525\_at 0.96152 Rho GTPase activating protein 12 Arhgap12  
1451526\_at 1.03354 Rho GTPase activating protein 12 Arhgap12  
1451527\_at 0.92463 procollagen C-endopeptidase enhancer 2 Pcolce2  
1451528\_at 0.88661 cDNA sequence BC025833 BC025833  
1451529\_at 1.29058 "small glutamine-rich tetratricopeptide repeat (TPR)-containing, beta" Sgfb  
1451530\_at 0.81477 epidermal growth factor receptor Egfr  
1451531\_at 1.01311 COBW domain containing 1 Cbwd1  
1451532\_s\_at 1.25562 six transmembrane epithelial antigen of the prostate 1 Steap1  
1451533\_at 1.08073 cDNA sequence BC022687 BC022687  
1451534\_at 1.08706 "secretagogin, EF-hand calcium binding protein" Scgn  
1451535\_at 1.15117 interleukin 31 receptor A Il31ra  
1451536\_at 0.87649 mitochondrial fission regulator 1 Mtf1  
1451537\_at 1.04468 chitinase 3-like 1 Chi3l1  
1451538\_at 0.93406 SRY-box containing gene 9 Sox9  
1451539\_at 0.67616 BAI1-associated protein 2-like 1 Baiap2l1  
1451540\_at 1.02462 mannose phosphate isomerase 1 Mpi1  
1451541\_at 1.00594 BCS1-like (yeast) Bcs1l  
1451542\_at 1.00587 single-stranded DNA binding protein 2 Ssbp2  
1451543\_at 0.90793 F-box only protein 21 Fbxo21  
1451544\_at 1.14768 TAP binding protein-like Tapbp1  
1451545\_at 0.82838 tudor domain containing 3 Tdrd3  
1451546\_s\_at 1.07123 transmembrane protein 40 Tmem40  
1451547\_at 1.03612 iodotyrosine deiodinase Iyd  
1451548\_at 1.01357 --- ---  
1451549\_at 1.10375 cDNA sequence BC016201 BC016201  
1451550\_at 0.91190 Eph receptor B3 Ephb3  
1451551\_at 1.09175 keratin 84 Krt84

1451552\_at 1.07361 Similar to lipoyltransferase MGC28431  
1451553\_at 0.89815 ADP-ribosyltransferase 5 Art5  
1451554\_a\_at 1.00137 anterior pharynx defective 1a homolog (C. elegans) Aph1a  
1451555\_at 1.17154 neurolysin (metallopeptidase M3 family) Nln  
1451556\_a\_at 1.01262 RIKEN cDNA 2700078E11 gene 2700078E11Rik  
1451557\_at 0.92367 tyrosine aminotransferase Tat  
1451558\_at 1.09431 "F-box and WD-40 domain protein 7, archipelago homolog (Drosophila)"  
Fbxw7  
1451559\_a\_at 1.03878 dehydrogenase/reductase (SDR family) member 4 Dhrs4  
1451560\_at 0.96039 proline rich 12 Prr12  
1451561\_at 0.97636 proline rich 12 Prr12  
1451562\_at 0.88841 cDNA sequence BC006662 BC006662  
1451563\_at 0.92900 "EGF-like module containing, mucin-like, hormone receptor-like sequence  
4" Emr4  
1451564\_at 1.40086 "poly (ADP-ribose) polymerase family, member 14" Parp14  
1451565\_s\_at 0.96728 urocanase domain containing 1 Uroc1  
1451566\_at 0.81251 cDNA sequence BC005471 BC005471  
1451567\_a\_at 1.11063 interferon activated gene 203 Ifi203  
1451568\_at 1.18092 RIKEN cDNA A630054L15 gene A630054L15Rik  
1451569\_at 1.04165 "nuclear receptor subfamily 2, group C, member 2" Nr2c2  
1451570\_a\_at 0.95751 RIKEN cDNA 6720467C03 gene 6720467C03Rik  
1451571\_s\_at 0.96085 RIKEN cDNA 9130019O22 gene /// RIKEN cDNA E430018J23 gene ///  
RIKEN cDNA 8030466O12 gene /// RIKEN cDNA 6430604K15 gene 9130019O22Rik ///  
E430018J23Rik /// 8030466O12Rik /// 6430604K15Rik  
1451572\_a\_at 0.93323 RIKEN cDNA 5230400G24 gene /// hypothetical protein LOC637796  
5230400G24Rik /// LOC637796  
1451573\_a\_at 1.12390 syntaxin 4A (placental) Stx4a  
1451574\_at 0.99008 B-cell CLL/lymphoma 9 Bcl9  
1451575\_a\_at 1.05650 nudix (nucleotide diphosphate linked moiety X)-type motif 3 Nudt3  
1451576\_at 0.98638 "protein kinase, DNA activated, catalytic polypeptide" Prkdc  
1451577\_at 1.04615 zinc finger and BTB domain containing 20 Zbtb20  
1451578\_at 1.06529 coiled-coil domain containing 65 Ccdc65  
1451579\_at 0.78669 cDNA sequence BC024139 BC024139  
1451580\_a\_at 0.86364 transthyretin Ttr  
1451581\_at 1.03084 "SAPS domain family, member 2" Saps2  
1451582\_at 0.95832 tubby like protein 1 Tulp1  
1451583\_a\_at 0.93289 cDNA sequence BC025076 BC025076  
1451584\_at 1.01285 hepatitis A virus cellular receptor 2 Havcr2  
1451585\_x\_at 0.89785 splA/ryanodine receptor domain and SOCS box containing 2 Spsb2  
1451586\_at 0.98007 testis enhanced gene transcript Tegt  
1451587\_a\_at 1.03181 "TIP41, TOR signalling pathway regulator-like (S. cerevisiae)" Tipr1  
1451588\_at 1.08461 RIKEN cDNA 1810022C23 gene 1810022C23Rik  
1451589\_at 0.84603 opposite strand transcription unit to Stag3 Gats

1451590\_at 0.97109 complexin 4 Cplx4  
1451591\_a\_at 0.78012 ephrin B1 Efnb1  
1451592\_at 0.89929 Myb protein P42POP P42pop  
1451593\_at 1.06176 "Histocompatibility 2, K1, K region" H2-K1  
1451594\_s\_at 1.04311 "serine (or cysteine) peptidase inhibitor, clade B, member 6c" Serpinb6c  
1451595\_a\_at 1.00497 "potassium voltage-gated channel, subfamily Q, member 2" Kcnq2  
1451596\_a\_at 1.35444 sphingosine kinase 1 Sphk1  
1451597\_at 1.02283 "transmembrane protease, serine 11d" Tmprss11d  
1451598\_at 1.04914 paired box gene 4 Pax4  
1451599\_at 1.11985 sestrin 2 Sesn2  
1451600\_s\_at 1.01440 esterase 31-like /// esterase 31 LOC13909 /// Es31  
1451601\_a\_at 0.70532 cDNA sequence BC011467 BC011467  
1451602\_at 1.07244 sorting nexin 6 Snx6  
1451603\_at 0.96446 retbindin Rtbdn  
1451604\_a\_at 1.01568 "activin A receptor, type II-like 1" Acvr11  
1451605\_at 1.03472 dyslexia susceptibility 1 candidate 1 homolog (human) Dyx1c1  
1451606\_at 1.13798 RIKEN cDNA A530016L24 gene A530016L24Rik  
1451607\_at 0.94565 kallikrein 1-related peptidase b21 Klk1b21  
1451608\_a\_at 1.00508 tetraspanin 33 Tspan33  
1451609\_at 0.95926 tetraspanin 33 Tspan33  
1451610\_at 1.15578 cDNA sequence BC024561 BC024561  
1451611\_at 1.01915 HRAS like suppressor 3 Hrasls3  
1451612\_at 1.08239 metallothionein 1 Mtl  
1451613\_at 0.99734 hornerin HrnR  
1451614\_a\_at 0.96264 amelogenin X chromosome Amelx  
1451615\_at 1.09896 cDNA sequence BC026374 BC026374  
1451616\_at 0.87553 pregnancy specific glycoprotein pseudogene 1 Psg-ps1  
1451617\_at 0.95401 rhodopsin Rho  
1451618\_at 1.02789 rhodopsin Rho  
1451619\_at 0.90006 golgi phosphoprotein 3-like Golph31  
1451620\_at 1.01218 C1q-like 3 C1ql3  
1451621\_at 1.08238 RIKEN cDNA 5830417C01 gene 5830417C01Rik  
1451622\_at 1.01839 LMBR1 domain containing 1 Lmbrd1  
1451623\_at 0.86216 mitochondrial ribosomal protein L15 Mrpl15  
1451624\_a\_at 1.06233 "phosphatase, orphan 2" Phospho2  
1451625\_a\_at 0.69829 "complement component 8, gamma subunit" C8g  
1451626\_x\_at 1.07493 Transcribed locus ---  
1451627\_a\_at 0.95015 "solute carrier family 1 (glial high affinity glutamate transporter), member 2"  
Slc1a2  
1451628\_a\_at 0.88362 "ankyrin 3, epithelial" Ank3  
1451629\_at 0.93850 limb-bud and heart Lbh  
1451630\_at 1.05115 tubulin tyrosine ligase Ttl  
1451631\_at 1.08609 cDNA sequence BC021395 BC021395

1451632\_a\_at 0.97726 immunoglobulin heavy chain 1a (serum IgG2a) Igh-1a  
 1451633\_a\_at 0.92041 "guanine nucleotide binding protein (G protein), gamma transducing activity polypeptide 1" Gngt1  
 1451634\_at 1.26881 RIKEN cDNA 2810051F02 gene 2810051F02Rik  
 1451635\_at 0.96956 RIKEN cDNA D630002G06 gene /// RIKEN cDNA C730048C13 gene /// similar to integral membrane transport protein UST5r D630002G06Rik /// C730048C13Rik /// LOC673838  
 1451636\_at 0.96759 ankyrin repeat domain 33 Ankrd33  
 1451637\_a\_at 1.18853 "mucin 10, submandibular gland salivary mucin" Muc10  
 1451638\_s\_at 1.00204 armadillo repeat containing 1 /// similar to armadillo repeat-containing protein Armc1 /// LOC634390  
 1451639\_at 1.04264 "CCAAT/enhancer binding protein (C/EBP), gamma" Cebpg  
 1451640\_a\_at 0.90800 RIKEN cDNA 1500011J06 gene 1500011J06Rik  
 1451641\_at 1.02710 debranching enzyme homolog 1 (*S. cerevisiae*) Dbr1  
 1451642\_at 0.93001 kinesin family member 1B Kif1b  
 1451643\_a\_at 1.08079 "RAB4B, member RAS oncogene family" Rab4b  
 1451644\_a\_at 0.94369 "histocompatibility 2, Q region locus 1 /// RIKEN cDNA 0610037M15 gene" H2-Q1 /// 0610037M15Rik  
 1451645\_at 1.06603 fibrosin 1 Fbs1  
 1451646\_at 0.98967 PDLIM1 interacting kinase 1 like Pdik11  
 1451647\_at 0.86436 "solute carrier family 24 (sodium/potassium/calcium exchanger), member 1" Slc24a1  
 1451648\_a\_at 0.94338 folate receptor 2 (fetal) Folr2  
 1451649\_a\_at 1.09338 WD repeat domain 75 Wdr75  
 1451650\_at 0.99404 D-aspartate oxidase Ddo  
 1451651\_at 0.94894 V-set and immunoglobulin domain containing 4 Vsig4  
 1451652\_a\_at 0.96257 RIKEN cDNA 5033428A16 gene 5033428A16Rik  
 1451653\_a\_at 1.01860 RIKEN cDNA 4930430E16 gene 4930430E16Rik  
 1451654\_x\_at 1.06047 cDNA sequence BC012278 BC012278  
 1451655\_at 0.85241 schlafen 8 Slfn8  
 1451656\_at 0.90233 calmin Clmn  
 1451657\_a\_at 0.88785 cytosolic ovarian carcinoma antigen 1 Coval  
 1451658\_a\_at 0.98964 polymerase (RNA) III (DNA directed) polypeptide C Polr3c  
 1451659\_at 0.97131 "FYVE, RhoGEF and PH domain containing 4" Fgd4  
 1451660\_a\_at 0.94466 homeo box B6 Hoxb6  
 1451661\_at 1.05156 A kinase (PRKA) anchor protein 4 Akap4  
 1451662\_x\_at 1.06798 A kinase (PRKA) anchor protein 4 Akap4  
 1451663\_a\_at 0.85236 tripartite motif protein 3 Trim3  
 1451664\_x\_at 1.02861 "killer cell lectin-like receptor, subfamily A, member 1 /// killer cell lectin-like receptor subfamily A, member 12 /// killer cell lectin-like receptor subfamily A, member 13 /// killer cell lectin-like receptor, subfamily A, member 4 /// killer cell lectin-like receptor, subfamily A, member 7 /// killer cell lectin-like receptor, subfamily A, member 15 /// killer cell lectin-like receptor subfamily A, member 23 /// killer cell lectin-like receptor subfamily A, member 20 /// killer cell lectin-like receptor

subfamily A, member 22 /// killer cell lectin-like receptor, subfamily A, member 18 /// similar to killer  
 cell lectin-like receptor subfamily A, member 13" Klra1 /// Klra12 /// Klra13 /// Klra4 /// Klra7 ///  
 Klra15 /// Klra23 /// Klra20 /// Klra22 /// Klra18 /// LOC673407  
 1451665\_a\_at 1.09679 "adaptor-related protein complex AP-4, sigma 1" Ap4s1  
 1451666\_at 1.26345 ATP citrate lyase Acly  
 1451667\_at 0.95112 RIKEN cDNA C530043G21 gene C530043G21Rik  
 1451668\_at 1.02240 RIKEN cDNA C530043G21 gene C530043G21Rik  
 1451669\_at 0.96675 "protein phosphatase 1B, magnesium dependent, beta isoform" Ppm1b  
 1451670\_at 0.84685 RIKEN cDNA 1810048P08 gene 1810048P08Rik  
 1451671\_at 0.91862 golgi reassembly stacking protein 1 Gorasp1  
 1451672\_at 0.96173 G protein-coupled receptor kinase 6 Gprk6  
 1451673\_at 1.02152 "CD8 antigen, alpha chain /// similar to T-cell surface glycoprotein CD8 alpha  
 chain precursor (T-cell surface glycoprotein Lyt-2) /// similar to T-cell surface glycoprotein CD8 alpha  
 chain precursor (T-cell surface glycoprotein Lyt-2) (CD8a antigen)" Cd8a /// LOC636147 ///  
 LOC669166  
 1451674\_at 0.67673 "solute carrier family 12, member 5" Slc12a5  
 1451675\_a\_at 0.99850 "aminolevulinic acid synthase 2, erythroid" Alas2  
 1451676\_at 0.98600 Dr1 associated protein 1 (negative cofactor 2 alpha) Drap1  
 1451677\_at 1.09621 nuclear prelamin A recognition factor Narf  
 1451678\_at 0.90120 nuclear prelamin A recognition factor Narf  
 1451679\_at 0.97817 RIKEN cDNA 6530401D17 gene 6530401D17Rik  
 1451680\_at 0.98936 sulfiredoxin 1 homolog (S. cerevisiae) Srxn1  
 1451681\_at 0.98531 cDNA sequence BC089597 BC089597  
 1451682\_at 1.01301 zinc finger protein 142 Zfp142  
 1451683\_x\_at 1.84670 "similar to H-2 class I histocompatibility antigen, L-D alpha chain precursor"  
 LOC547343  
 1451684\_a\_at 1.09090 bicaudal D homolog 1 (Drosophila) Bcd1  
 1451685\_at 1.07418 myeloid/lymphoid or mixed lineage-leukemia translocation to 6 homolog  
 (Drosophila) /// similar to myeloid/lymphoid or mixed lineage-leukemia translocation to 6 homolog ///  
 similar to myeloid/lymphoid or mixed lineage-leukemia translocation to 6 homolog Mllt6 ///  
 LOC639490 /// LOC669933  
 1451686\_x\_at 0.89754 amelogenin X chromosome Amelx  
 1451687\_a\_at 0.85291 transcription factor 2 Tcf2  
 1451688\_s\_at 0.78846 calcium activated nucleotidase 1 Cant1  
 1451689\_a\_at 0.97988 SRY-box containing gene 10 Sox10  
 1451690\_a\_at 1.05018 poliovirus receptor-related 4 Pvr14  
 1451691\_at 1.02368 endothelin receptor type A Ednra  
 1451692\_at 1.17457 RIKEN cDNA 2410015B03 gene 2410015B03Rik  
 1451693\_a\_at 1.14063 fibroblast growth factor 12 Fgf12  
 1451694\_at 0.98478 "tubulin tyrosine ligase-like family, member 3" Ttl13  
 1451695\_a\_at 1.10320 glutathione peroxidase 4 Gpx4  
 1451696\_at 1.02087 zinc finger protein 64 Zfp64  
 1451697\_a\_at 0.83784 Ellis van Creveld gene homolog (human) Evc

1451698\_at 0.99683 proline/serine-rich coiled-coil 1 Psrc1  
 1451699\_at 1.14686 similar to putative retrovirus-related gag protein /// hypothetical protein  
 LOC668631 /// similar to putative retrovirus-related gag protein LOC668468 /// LOC668631 ///  
 LOC675654  
 1451700\_a\_at 1.07691 RIKEN cDNA 1110007L15 gene 1110007L15Rik  
 1451701\_x\_at 0.84713 claudin 3 Cldn3  
 1451702\_at 1.00057 CKLF-like MARVEL transmembrane domain containing 7 Cmtm7  
 1451703\_s\_at 1.08295 --- ---  
 1451704\_at 1.01938 androgen binding protein delta Abpd  
 1451705\_a\_at 1.04464 "opioid receptor, mu 1" Oprm1  
 1451706\_a\_at 1.09371 "gamma-aminobutyric acid (GABA-A) receptor, subunit alpha 6" Gabra6  
 1451707\_s\_at 0.80073 "solute carrier family 41, member 3" Slc41a3  
 1451708\_at 1.02379 G protein-coupled receptor 33 Gpr33  
 1451709\_at 1.08987 "opioid receptor, mu 1" Oprm1  
 1451710\_at 0.91259 osteoclast associated receptor Oscar  
 1451711\_at 1.00726 wingless-type MMTV integration site 9B Wnt9b  
 1451712\_at 1.04301 RIKEN cDNA 8030411F24 gene 8030411F24Rik  
 1451713\_a\_at 0.91293 "Fc receptor, IgE, low affinity II, alpha polypeptide" Fcer2a  
 1451714\_a\_at 1.07555 mitogen activated protein kinase kinase 3 Map2k3  
 1451715\_at 0.99412 "v-maf musculoaponeurotic fibrosarcoma oncogene family, protein B  
 (avian)" Mafb  
 1451716\_at 0.94228 "v-maf musculoaponeurotic fibrosarcoma oncogene family, protein B  
 (avian)" Mafb  
 1451717\_s\_at 1.12668 SUMO/sentrin specific peptidase 2 Senp2  
 1451718\_at 1.14142 proteolipid protein (myelin) 1 Plp1  
 1451719\_at 0.95831 "cofactor required for Sp1 transcriptional activation, subunit 6" Crsp6  
 1451720\_at 0.87646 vacuolar protein sorting 39 (yeast) Vps39  
 1451721\_a\_at 1.11054 "histocompatibility 2, class II antigen A, beta 1" H2-Ab1  
 1451722\_s\_at 0.99549 SET and MYND domain containing 5 Smyd5  
 1451723\_at 0.89279 "CCR4-NOT transcription complex, subunit 6-like" Cnot6l  
 1451724\_at 0.90571 ankyrin repeat and MYND domain containing 2 Ankmy2  
 1451725\_a\_at 1.03957 "proteasome (prosome, macropain) 26S subunit, non-ATPase, 4" Psmd4  
 1451726\_at 0.96577 myotubularin related protein 6 Mtmr6  
 1451727\_at 0.93820 "DNA segment, Chr 11, ERATO Doi 730, expressed" D11Ert730e  
 1451728\_at 0.97455 WD repeat domain 13 Wdr13  
 1451729\_at 0.98612 "bone morphogenetic protein receptor, type 1A" Bmpr1a  
 1451730\_at 0.96742 zinc finger protein 62 Zfp62  
 1451731\_at 0.94723 "ATP-binding cassette, sub-family A (ABC1), member 3" Abca3  
 1451732\_at 1.03095 PRP4 pre-mRNA processing factor 4 homolog B (yeast) Prpf4b  
 1451733\_at 1.03583 "glucosaminyl (N-acetyl) transferase 2, I-branching enzyme" Gcnt2  
 1451734\_a\_at 0.69918 drebrin 1 Dbn1  
 1451735\_at 1.01038 ADP-ribosylation factor related protein 1 Arfrp1  
 1451736\_a\_at 0.95050 mitogen activated protein kinase kinase 7 Map2k7

1451737\_at 1.10482 "phosphatidylinositol 3-kinase, regulatory subunit, polypeptide 1 (p85 alpha)"  
 Pik3r1  
 1451738\_at 0.91906 O-linked N-acetylglucosamine (GlcNAc) transferase (UDP-N-  
 acetylglucosamine:polypeptide-N-acetylglucosaminyl transferase) Ogt  
 1451739\_at 1.37182 Kruppel-like factor 5 Klf5  
 1451740\_at 0.87694 polyadenylate binding protein-interacting protein 1 Paip1  
 1451741\_a\_at 1.10238 cyclin-dependent kinase 7 (homolog of Xenopus MO15 cdk-activating  
 kinase) Cdk7  
 1451742\_a\_at 0.98888 UDP-glucose pyrophosphorylase 2 Ugp2  
 1451743\_at 0.91095 "DNA segment, Chr 19, Wayne State University 162, expressed" D19Wsu162e  
 1451744\_a\_at 0.92478 "zinc binding alcohol dehydrogenase, domain containing 1" Zadh1  
 1451745\_a\_at 1.04764 "zinc finger, HIT domain containing 1" Znhit1  
 1451746\_a\_at 0.96279 autophagy-related 12 (yeast) Atg12  
 1451747\_a\_at 0.97068 autophagy-related 12 (yeast) Atg12  
 1451748\_a\_at 1.00452 SET domain containing 3 Setd3  
 1451749\_at 0.96886 interleukin-1 receptor-associated kinase 4 Irak4  
 1451750\_at 0.97161 --- ---  
 1451751\_at 0.86643 DNA-damage-inducible transcript 4-like Ddit4l  
 1451752\_at 0.88867 forkhead box K1 Foxk1  
 1451753\_at 0.96685 plexin A2 Plxna2  
 1451754\_a\_at 0.97890 WD repeat domain 45 Wdr45  
 1451755\_a\_at 1.05667 apolipoprotein B editing complex 1 Apobec1  
 1451756\_at 0.93875 FMS-like tyrosine kinase 1 Flt1  
 1451757\_at 0.95150 cDNA sequence BC003883 BC003883  
 1451758\_at 1.17673 laminin gamma 3 Lamc3  
 1451759\_at 0.97380 mannan-binding lectin serine peptidase 2 Masp2  
 1451760\_s\_at 1.05863 RIKEN cDNA 2010001E11 gene /// expressed sequence AI317395  
 2010001E11Rik /// AI317395  
 1451761\_at 1.01921 homeo box B4 Hoxb4  
 1451762\_a\_at 0.90425 kinesin family member 1B Kif1b  
 1451763\_at 1.11574 cyclic nucleotide gated channel alpha 1 Cnga1  
 1451764\_at 1.14352 MARVEL (membrane-associating) domain containing 3 Marveld3  
 1451765\_a\_at 0.85112 ectonucleoside triphosphate diphosphohydrolase 5 Entpd5  
 1451766\_at 1.25566 cadherin 11 Cdh11  
 1451767\_at 1.07609 neutrophil cytosolic factor 1 Ncf1  
 1451768\_a\_at 1.08596 "solute carrier family 20, member 2" Slc20a2  
 1451769\_s\_at 0.89671 "protocadherin alpha 4 /// protocadherin alpha 6 /// protocadherin alpha 7 ///  
 protocadherin alpha 5 /// protocadherin alpha 11 /// protocadherin alpha 10 /// protocadherin alpha 1 ///  
 protocadherin alpha 9 /// protocadherin alpha cluster /// protocadherin alpha 3 /// protocadherin alpha  
 12 /// protocadherin alpha 2 /// protocadherin alpha 8 /// protocadherin alpha subfamily C, 1 ///  
 protocadherin alpha subfamily C, 2" Pcdha4 /// Pcdha6 /// Pcdha7 /// Pcdha5 /// Pcdha11 ///  
 Pcdha10 /// Pcdha1 /// Pcdha9 /// Pcdha@ /// Pcdha3 /// Pcdha12 /// Pcdha2 /// Pcdha8 /// Pcdhac1 ///  
 Pcdhac2

1451770\_s\_at 1.12251 DEAH (Asp-Glu-Ala-His) box polypeptide 9 Dhx9  
 1451771\_at 0.95487 two pore channel 1 Tpcn1  
 1451772\_at 1.04602 two pore channel 1 Tpcn1  
 1451773\_s\_at 1.00133 polymerase (RNA) III (DNA directed) polypeptide F Polr3f  
 1451774\_at 0.89036 similar to keratin associated protein 4-10; keratin associated protein 4.10  
 LOC435285  
 1451775\_s\_at 1.06318 "interleukin 13 receptor, alpha 1" Il13ra1  
 1451776\_s\_at 0.94667 homeobox only domain Hod  
 1451777\_at 0.96784 cDNA sequence BC013672 BC013672  
 1451778\_at 0.92030 CREB regulated transcription coactivator 3 Crtc3  
 1451779\_at 1.12797 cDNA sequence BC027061 BC027061  
 1451780\_at 1.07612 B-cell linker Blnk  
 1451781\_at 1.00454 "nuclear factor of activated T-cells, cytoplasmic, calcineurin-dependent 2  
 interacting protein" Nfatc2ip  
 1451782\_a\_at 0.91778 "solute carrier family 29 (nucleoside transporters), member 1" Slc29a1  
 1451783\_a\_at 0.93543 kinesin-associated protein 3 Kifap3  
 1451784\_x\_at 2.07227 "histocompatibility 2, D region locus 1 /// histocompatibility 2, D region ///  
 similar to H-2 class I histocompatibility antigen, L-D alpha chain precursor /// similar to H-2 class I  
 histocompatibility antigen, D-B alpha chain precursor (H-2D(B))" H2-D1 /// H2-L ///  
 LOC547343 /// LOC636948  
 1451785\_at 0.96188 retinitis pigmentosa GTPase regulator interacting protein 1 Rpgrip1  
 1451786\_at 0.95730 mucin 20 Muc20  
 1451787\_at 0.78785 "cytochrome P450, family 2, subfamily b, polypeptide 10" Cyp2b10  
 1451788\_at 0.94880 coagulation factor XI F11  
 1451789\_a\_at 0.98648 receptor-like tyrosine kinase Ryk  
 1451790\_a\_at 0.98239 tissue factor pathway inhibitor Tfpi  
 1451791\_at 1.11295 tissue factor pathway inhibitor Tfpi  
 1451792\_a\_at 0.79263 "praja1, RING-H2 motif containing" Pja1  
 1451793\_at 0.70895 kelch-like 24 (Drosophila) Klh24  
 1451794\_at 0.87481 transmembrane and coiled coil domains 3 Tmcc3  
 1451795\_at 0.87832 target of myb1-like 2 (chicken) Tom112  
 1451796\_s\_at 0.94966 histidine decarboxylase Hdc  
 1451797\_at 1.24523 "Smg-5 homolog, nonsense mediated mRNA decay factor (C. elegans)"  
 Smg5  
 1451798\_at 1.09355 interleukin 1 receptor antagonist Il1rn  
 1451799\_at 1.26857 coiled-coil domain containing 25 Ccdc25  
 1451800\_at 0.95349 GRIP and coiled-coil domain containing 2 Gcc2  
 1451801\_at 0.96860 triadin Trdn  
 1451802\_at 1.10581 mast cell protease 6 Mcpt6  
 1451803\_a\_at 1.11141 vascular endothelial growth factor B Vegfb  
 1451804\_a\_at 1.07873 leucine rich repeat containing 16 Lrrc16  
 1451805\_at 0.90510 pleckstrin homology domain interacting protein Phip  
 1451806\_at 1.09437 formin binding protein 1 Fbnp1



1451807\_at 1.05129 "nuclear receptor subfamily 1, group I, member 2" Nr1i2  
 1451808\_at 1.01843 "potassium inwardly-rectifying channel, subfamily J, member 4" Kcnj4  
 1451809\_s\_at 0.96383 RWD domain containing 3 Rwdd3  
 1451810\_at 0.81588 open reading frame 63 ORF63  
 1451811\_at 1.00131 "calcium channel, voltage-dependent, gamma subunit 6" Cacng6  
 1451812\_at 1.06742 a disintegrin and metallopeptidase domain 22 Adam22  
 1451813\_at 0.82590 "opioid receptor, kappa 1" Oprk1  
 1451814\_a\_at 1.18328 "HIV-1 tat interactive protein 2, homolog (human)" Htatip2  
 1451815\_at 1.03312 "UDP-GlcNAc:betaGal beta-1,3-N-acetylglucosaminyltransferase 4" B3gnt4  
 1451816\_at 0.84592 zinc finger protein 451 Zfp451  
 1451817\_at 1.01474 suppressor of variegation 4-20 homolog 1 (Drosophila) Suv420h1  
 1451818\_at 1.02534 mindbomb homolog 1 (Drosophila) Mib1  
 1451819\_at 1.13771 "zinc finger, SWIM domain containing 6" Zswim6  
 1451820\_at 0.88704 "DIRAS family, GTP-binding RAS-like 1" Diras1  
 1451821\_a\_at 1.08664 nuclear antigen Sp100 Sp100  
 1451822\_a\_at 0.99029 secernin 2 Scrn2  
 1451823\_at 1.25657 chloride channel calcium activated 4 Clca4  
 1451824\_at 0.96252 "butyrophilin, subfamily 1, member A1" Btn1a1  
 1451825\_a\_at 0.93888 "coatomer protein complex, subunit zeta 1" Copz1  
 1451826\_at 0.90972 calcium binding protein 5 Cabp5  
 1451827\_a\_at 0.82089 NADPH oxidase 4 Nox4  
 1451828\_a\_at 1.47223 acyl-CoA synthetase long-chain family member 4 Acsl4  
 1451829\_a\_at 0.94879 neurofibromatosis 2 Nf2  
 1451830\_a\_at 1.32393 spectrin beta 2 Spnb2  
 1451831\_at 0.93076 oxysterol binding protein-like 6 Osbpl6  
 1451832\_at 1.20287 --- ---  
 1451833\_a\_at 1.01024 "SET domain, bifurcated 1" Setdb1  
 1451834\_at 0.95685 "calcium channel, voltage-dependent, beta 1 subunit" Cacnb1  
 1451835\_at 0.93567 SRY-box containing gene 21 Sox21  
 1451836\_at 1.19677 cDNA sequence BC022651 BC022651  
 1451837\_at 0.91766 "adaptor-related protein complex 3, beta 2 subunit" Ap3b2  
 1451838\_a\_at 0.94880 membrane targeting (tandem) C2 domain containing 1 Mtac2d1  
 1451839\_a\_at 1.08239 phosphodiesterase 7A Pde7a  
 1451840\_at 0.77624 Kv channel interacting protein 4 Kcnip4  
 1451841\_a\_at 0.83575 nuclear receptor co-repressor 2 Ncor2  
 1451842\_a\_at 1.03456 "cholinergic receptor, nicotinic, beta polypeptide 3" Chrn3  
 1451843\_a\_at 0.96757 "glycoprotein galactosyltransferase alpha 1, 3" Ggta1  
 1451844\_at 1.07499 prolactin receptor Prlr  
 1451845\_a\_at 1.07758 peptidyl-tRNA hydrolase 2 Ptrh2  
 1451846\_at 0.86593 nebulin Nebl  
 1451847\_s\_at 0.84256 AT rich interactive domain 4B (Rbp1 like) Arid4b  
 1451848\_a\_at 0.95962 "crystallin, zeta" Cryz  
 1451849\_a\_at 1.00466 lamin B2 Lmnb2

1451850\_at 0.91406 prolactin receptor Prlr  
1451851\_a\_at 1.00509 casein kappa Csn3  
1451852\_at 0.88330 "2-cell-stage, variable group, member 3" Tcstv3  
1451853\_at 0.98447 Fukuyama type congenital muscular dystrophy homolog (human) Fcmd  
1451854\_a\_at 1.06513 shroom family member 3 Shroom3  
1451855\_at 1.04804 B-cell CLL/lymphoma 7A Bcl7a  
1451856\_at 0.84300 trinucleotide repeat containing 15 Tnrc15  
1451857\_a\_at 0.92417 RIKEN cDNA 5730593N15 gene 5730593N15Rik  
1451858\_at 0.91614 "MAS-related GPR, member A2 /// similar to MAS-related GPR, member A2"  
Mrgpra2 /// LOC668727  
1451859\_at 1.08836 keratin associated protein 6-1 Krtap6-1  
1451860\_a\_at 1.04277 tripartite motif protein 30 Trim30  
1451861\_at 0.93087 RIKEN cDNA 4930519N16 gene 4930519N16Rik  
1451862\_a\_at 0.89709 perforin 1 (pore forming protein) Prf1  
1451863\_at 0.94315 urotensin 2 receptor Uts2r  
1451864\_at 0.93450 "calcium channel, voltage-dependent, gamma subunit 8" Cacng8  
1451865\_at 1.05457 coxsackievirus and adenovirus receptor Cxadr  
1451866\_a\_at 0.91284 hepatocyte growth factor Hgf  
1451867\_x\_at 0.96780 Rho GTPase activating protein 6 Arhgap6  
1451868\_at 1.02485 "potassium inwardly-rectifying channel, subfamily J, member 6" Kcnj6  
1451869\_at 1.04805 "ATP-binding cassette, sub-family A (ABC1), member 3" Abca3  
1451870\_a\_at 1.33491 bromodomain containing 4 Brd4  
1451871\_a\_at 0.63530 growth hormone receptor Ghr  
1451872\_a\_at 0.95052 neuralized-like homolog (Drosophila) Neurl  
1451873\_a\_at 0.87896 MAD homolog 5 (Drosophila) Smad5  
1451874\_at 0.93914 --- ---  
1451875\_at 0.92436 cDNA sequence AF366264 AF366264  
1451876\_a\_at 1.08084 transformation related protein 63 Trp63  
1451877\_at 1.00084 ectodysplasin-A Eda  
1451878\_a\_at 0.89496 junction-mediating and regulatory protein Jmy  
1451879\_a\_at 1.09068 "solute carrier family 6 (neurotransmitter transporter), member 18" Slc6a18  
1451880\_at 0.91336 hypothetical LOC638575 LOC638575  
1451881\_at 0.89819 --- ---  
1451882\_a\_at 0.98363 fibroblast growth factor 8 Fgf8  
1451883\_at 1.07470 hypothetical LOC620316 LOC620316  
1451884\_a\_at 1.05571 "LSM2 homolog, U6 small nuclear RNA associated (S. cerevisiae)" Lsm2  
1451885\_at 0.95738 metallothionein 1K LOC574530  
1451886\_at 0.92556 SPEG complex locus Spieg  
1451887\_at 1.02995 LPS-responsive beige-like anchor Lrba  
1451888\_a\_at 1.00865 odd Oz/ten-m homolog 4 (Drosophila) Odz4  
1451889\_at 0.97582 Notch gene homolog 2 (Drosophila) Notch2  
1451890\_at 0.76323 kinesin family member 13A Kif13a  
1451891\_a\_at 0.91600 dysferlin Dysf

1451892\_at 0.88287 klotho Kl  
 1451893\_s\_at 0.90640 "membrane associated guanylate kinase, WW and PDZ domain containing 1"  
 Magi1  
 1451894\_a\_at 0.91393 "sodium channel, voltage-gated, type VIII, alpha" Scn8a  
 1451895\_a\_at 1.38554 24-dehydrocholesterol reductase Dhcr24  
 1451896\_a\_at 1.04282 calcium homeostasis endoplasmic reticulum protein Cherp  
 1451897\_a\_at 0.86849 neighbor of Brca1 gene 1 Nbr1  
 1451898\_a\_at 0.88162 "sema domain, transmembrane domain (TM), and cytoplasmic domain,  
 (semaphorin) 6C" Sema6c  
 1451899\_a\_at 0.94951 general transcription factor II I repeat domain-containing 1 Gtf2ird1  
 1451900\_at 0.81770 mitofusin 2 Mfn2  
 1451901\_at 1.14298 "SWI/SNF related, matrix associated, actin dependent regulator of chromatin,  
 subfamily a, member 3" Smarca3  
 1451902\_at 1.06781 zinc finger protein 758 Zfp758  
 1451903\_at 1.00999 kynureninase (L-kynurenine hydrolase) Kynu  
 1451904\_a\_at 0.97619 a disintegrin and metallopeptidase domain 33 Adam33  
 1451905\_a\_at 1.04516 myxovirus (influenza virus) resistance 1 Mx1  
 1451906\_at 1.04764 UBX domain containing 3 Ubx3  
 1451907\_a\_at 1.01678 "pleckstrin homology domain containing, family A (phosphoinositide binding  
 specific) member 4" Plekha4  
 1451908\_a\_at 1.02590 SEC14-like 1 (S. cerevisiae) Sec14l1  
 1451909\_a\_at 1.06110 PRP4 pre-mRNA processing factor 4 homolog B (yeast) Prpf4b  
 1451910\_a\_at 0.88671 CD6 antigen Cd6  
 1451911\_a\_at 0.95387 angiotensin I converting enzyme (peptidyl-dipeptidase A) 1 Ace  
 1451912\_a\_at 0.69274 fibroblast growth factor receptor-like 1 Fgfr11  
 1451913\_a\_at 0.94365 hypoxia up-regulated 1 Hyou1  
 1451914\_a\_at 1.07028 adducin 2 (beta) Add2  
 1451915\_at 0.99636 chaperonin subunit 3 (gamma) Cct3  
 1451916\_s\_at 1.00585 tripartite motif protein 15 Trim15  
 1451917\_a\_at 1.00574 doublecortin and calcium/calmodulin-dependent protein kinase-like 1  
 Dcamk11  
 1451918\_a\_at 0.90864 "loss of heterozygosity, 12, chromosomal region 1 homolog (human)"  
 Loh12cr1  
 1451919\_a\_at 1.00333 myeloproliferative leukemia virus oncogene Mpl  
 1451920\_a\_at 0.90975 replication factor C 1 Recc1  
 1451921\_a\_at 1.10897 nuclear factor of activated T-cells 5 Nfat5  
 1451922\_at 0.96520 "lectin, mannose-binding 1 like" Lman11  
 1451923\_at 0.90997 RIKEN cDNA 3222401M22 gene 3222401M22Rik  
 1451924\_a\_at 0.69794 endothelin 1 Edn1  
 1451925\_at 1.13264 ectodysplasin-A Eda  
 1451926\_at 1.09355 "MAS-related GPR, member A4" Mrgpra4  
 1451927\_a\_at 0.96703 mitogen activated protein kinase 14 Mapk14  
 1451928\_a\_at 1.09670 RAD18 homolog (S. cerevisiae) Rad18

1451929\_a\_at 0.97274 vaccinia related kinase 2 Vrk2  
 1451930\_at 2.57004 Ephrin A5 Efna5  
 1451931\_x\_at 1.85288 "histocompatibility 2, D region" H2-L  
 1451932\_a\_at 1.02220 ADAMTS-like 4 Adamtsl4  
 1451933\_a\_at 0.95357 cathepsin 7 Cts7  
 1451934\_at 0.91131 "histocompatibility 2, D region locus 1" H2-D1  
 1451935\_a\_at 0.98430 "serine protease inhibitor, Kunitz type 2" Spint2  
 1451936\_a\_at 0.98344 thioredoxin reductase 2 Txnrd2  
 1451937\_at 0.99059 "glycine receptor, alpha 4 subunit" Glra4  
 1451938\_a\_at 1.02846 "syntrophin, basic 1" Sntb1  
 1451939\_a\_at 1.03892 sushi-repeat-containing protein SrpX  
 1451940\_x\_at 0.94401 triadin Trdn  
 1451941\_a\_at 1.10402 "Fc receptor, IgG, low affinity IIb" Fcgr2b  
 1451942\_x\_at 0.92960 "killer cell lectin-like receptor subfamily A, member 20" Klra20  
 1451943\_a\_at 0.87090 "protein phosphatase 1A, magnesium dependent, alpha isoform" Ppm1a  
 1451944\_a\_at 0.89884 "tumor necrosis factor (ligand) superfamily, member 11" Tnfsf11  
 1451945\_at 0.96152 --- ---  
 1451946\_a\_at 0.91468 calcium-binding tyrosine-(Y)-phosphorylation regulated (fibrousheathin 2)  
 Cabyr  
 1451947\_at 0.96861 immunoglobulin heavy chain (V7183 family) Igh-V7183  
 1451948\_at 0.95514 "gene model 1409, (NCBI)" Gm1409  
 1451949\_at 1.01825 immunoglobulin heavy chain 4 (serum IgG1) /// immunoglobulin heavy chain 6  
 (heavy chain of IgM) /// immunoglobulin heavy chain (V7183 family) /// immunoglobulin heavy chain  
 (J558 family) /// similar to immunoglobulin heavy chain variable region /// immunoglobulin heavy chain  
 1a (serum IgG2a) /// Immunoglobulin heavy chain (gamma polypeptide) /// Ig heavy chain V region ///  
 similar to immunoglobulin mu-chain Igh-4 /// Igh-6 /// Igh-V7183 /// Igh-VJ558 /// LOC238447 ///  
 Igh-1a /// Ighg /// LOC380804 /// LOC544903  
 1451950\_a\_at 1.04124 CD80 antigen Cd80  
 1451951\_at 0.98293 Hypothetical protein LOC625794 LOC625794  
 1451952\_at 1.18057 prokineticin 2 Prok2  
 1451953\_at 0.96551 submaxillary gland androgen regulated protein 2 Smr2  
 1451954\_at 0.92453 --- ---  
 1451955\_a\_at 1.03323 "calcium channel, voltage-dependent, alpha 2/delta subunit 2 /// similar to  
 calcium channel, voltage-dependent, alpha 2/delta subunit 2" Cacna2d2 /// LOC669637  
 1451956\_a\_at 1.23691 "opioid receptor, sigma 1" Oprs1  
 1451957\_at 0.83229 "interleukin 1 family, member 10" Il1f10  
 1451958\_at 0.93913 similar to Ig heavy chain V region 93G7 precursor /// similar to Ig heavy chain  
 V region B1-8/186-2 precursor /// similar to Ig heavy chain V region 3 precursor /// similar to  
 monoclonal antibody heavy chain /// similar to Ig heavy chain V region VH558 A1/A4 precursor ///  
 similar to monoclonal antibody heavy chain /// similar to Ig heavy chain V region 102 precursor ///  
 similar to Ig heavy chain V region B1-8/186-2 precursor /// similar to Ig heavy chain V region VH558  
 A1/A4 precursor /// similar to Ig heavy chain V region VH558 A1/A4 precursor /// similar to Ig heavy  
 chain V region 3 precursor /// similar to Ig heavy chain V region B1-8/186-2 precursor /// similar to Ig

heavy chain V region VH558 B4 precursor /// similar to Ig heavy chain V region 23 precursor /// similar to Ig heavy chain V region 108A precursor /// similar to Ig heavy chain V region 23 precursor /// similar to Ig heavy chain V region 3 precursor /// similar to Ig heavy chain V region 102 precursor /// similar to Ig heavy chain V region 3 precursor /// similar to Ig heavy chain V region 3 precursor /// similar to Ig heavy chain V region 102 precursor /// similar to Ig heavy chain V region 23 precursor /// similar to Ig heavy chain V region 3 precursor /// similar to Ig heavy chain V region 3 precursor /// similar to Ig heavy chain V region VH558 A1/A4 precursor /// similar to Ig heavy chain V region 145 precursor /// similar to Ig heavy chain V region 93G7 precursor /// similar to Ig heavy chain V region 102 precursor /// similar to Ig heavy chain V region VH558 A1/A4 precursor /// similar to Ig heavy chain V region 3 precursor /// similar to Ig heavy chain V region 93G7 precursor /// similar to Ig heavy chain V region 93G7 precursor /// similar to Ig heavy chain V region 102 precursor    LOC211331 /// LOC380823 /// LOC382696 /// VH186.2-D-J-C mu /// LOC434638 /// LOC435333 /// LOC619833 /// LOC619916 /// LOC619994 /// LOC622728 /// LOC629941 /// LOC630549 /// LOC631531 /// LOC633774 /// LOC634123 /// LOC636044 /// LOC636134 /// LOC636244 /// LOC637785 /// LOC637794 /// LOC640207 /// LOC640979 /// LOC641003 /// LOC641114 /// LOC668478 /// LOC668549 /// LOC668577 /// LOC673286 /// LOC673498 /// LOC674018 /// LOC674023 /// LOC674472 /// LOC675659

1451959\_a\_at    0.94555 vascular endothelial growth factor A    Vegfa

1451960\_a\_at    0.95371 "REV3-like, catalytic subunit of DNA polymerase zeta RAD54 like (S. cerevisiae)"    Rev3l

1451961\_a\_at    0.90706 myelin basic protein    Mbp

1451962\_at    0.99244 immunoglobulin kappa light chain 17-1A    LOC213481

1451963\_at    1.03694 Anti-HLA class II antibody gamma F3.3 heavy chain variable region    ---

1451964\_at    0.93434 melanoma inhibitory activity 2    Mia2

1451965\_at    0.92368 Anti-human CD37 antibody WR17 kappa light chain variable region    ---

1451966\_at    1.02915 melanocortin 2 receptor accessory protein    Mrap

1451967\_x\_at    1.02230 karyopherin (importin) beta 1    Kpnb1

1451968\_at    1.00474 X-ray repair complementing defective repair in Chinese hamster cells 5    Xrcc5

1451969\_s\_at    1.25918 "poly (ADP-ribose) polymerase family, member 3"    Parp3

1451970\_at    0.96581 RIKEN cDNA E330036I19 gene    E330036I19Rik

1451971\_at    1.00365 cullin 4A    Cul4a

1451972\_at    0.78372 glucocorticoid induced transcript 1    Glcci1

1451973\_at    0.92362 ubiquitin-activating enzyme E1-domain containing 1    Ube1dc1

1451974\_at    0.91286 oxysterol binding protein-like 2    Osbpl2

1451975\_at    0.96843 RIKEN cDNA 2810453I06 gene    2810453I06Rik

1451976\_s\_at    1.01693 CKLF-like MARVEL transmembrane domain containing 2A    Cmtm2a

1451977\_at    0.99692 dual-specificity tyrosine-(Y)-phosphorylation regulated kinase 1a    Dyrk1a

1451978\_at    1.08321 lysyl oxidase-like 1    Loxl1

1451979\_at    0.96417 v-Ki-ras2 Kirsten rat sarcoma viral oncogene homolog    Kras

1451980\_at    0.90471 CAS1 domain containing 1    Casd1

1451981\_at    1.00179 gene trap ROSA b-geo 22    Gtrgeo22

1451982\_at    1.00019 mitogen activated protein kinase kinase 4    Map2k4

1451983\_at    0.90312 Iroquois related homeobox 1 (Drosophila)    Irx1

|              |         |                                                                                       |               |
|--------------|---------|---------------------------------------------------------------------------------------|---------------|
| 1451984_at   | 0.92822 | heterogeneous nuclear ribonucleoprotein U-like 1                                      | Hnrp11        |
| 1451985_at   | 0.94065 | leucine-rich repeat kinase 1                                                          | Lrrk1         |
| 1451986_s_at | 0.98243 | leucine-rich repeat kinase 1                                                          | Lrrk1         |
| 1451987_at   | 0.95085 | "arrestin, beta 2"                                                                    | Arrb2         |
| 1451988_s_at | 0.96996 | chromatin modifying protein 4B                                                        | Chmp4b        |
| 1451989_a_at | 0.87802 | "microtubule-associated protein, RP/EB family, member 2"                              | Mapre2        |
| 1451990_at   | 0.80704 | "microtubule-associated protein, RP/EB family, member 2"                              | Mapre2        |
| 1451991_at   | 0.76073 | Eph receptor A7                                                                       | Epha7         |
| 1451992_at   | 1.22754 | "adrenergic receptor kinase, beta 1"                                                  | Adrbk1        |
| 1451993_at   | 0.97409 | RIKEN cDNA 9130404D08 gene                                                            | 9130404D08Rik |
| 1451994_s_at | 0.97726 | RIKEN cDNA 3930401K13 gene                                                            | 3930401K13Rik |
| 1451995_at   | 0.93390 | "TAF11 RNA polymerase II, TATA box binding protein (TBP)-associated factor"           | Taf11         |
| 1451996_at   | 0.93773 | TM2 domain containing 1                                                               | Tm2d1         |
| 1451997_at   | 0.96245 | zinc finger protein 426                                                               | Zfp426        |
| 1451998_at   | 1.01796 | "taspase, threonine aspartase 1"                                                      | Tasp1         |
| 1451999_at   | 1.02645 | LIM domain binding 3                                                                  | Ldb3          |
| 1452000_s_at | 1.06338 | seryl-aminoacyl-tRNA synthetase                                                       | Sars          |
| 1452001_at   | 0.84157 | "nuclear factor, erythroid derived 2"                                                 | Nfe2          |
| 1452002_at   | 0.87696 | zinc finger protein 508                                                               | Zfp508        |
| 1452003_at   | 0.99875 | RNA binding motif protein 14                                                          | Rbm14         |
| 1452004_at   | 0.82735 | "calcitonin/calcitonin-related polypeptide, alpha"                                    | Calca         |
| 1452005_at   | 0.72705 | dihydrolipoamide S-acetyltransferase (E2 component of pyruvate dehydrogenase complex) | Dlat          |
| 1452006_x_at | 0.91499 | zinc finger and BTB domain containing 8 opposite strand                               | Zbtb8os       |
| 1452007_at   | 0.82166 | synaptobrevin like 1                                                                  | Sybl1         |
| 1452008_at   | 1.43081 | RIKEN cDNA 9130422G05 gene                                                            | 9130422G05Rik |
| 1452009_at   | 1.08844 | RIKEN cDNA 9130422G05 gene                                                            | 9130422G05Rik |
| 1452010_at   | 1.00821 | "cholinergic receptor, nicotinic, alpha polypeptide 3"                                | Chrna3        |
| 1452011_a_at | 1.01050 | UDP-glucuronate decarboxylase 1                                                       | Uxs1          |
| 1452012_a_at | 1.23243 | exosome component 1                                                                   | Exosc1        |
| 1452013_at   | 1.05489 | "ATPase, class V, type 10A"                                                           | Atp10a        |
| 1452014_a_at | 0.89024 | insulin-like growth factor 1                                                          | Igf1          |
| 1452015_at   | 1.02262 | RIKEN cDNA 6330416G13 gene                                                            | 6330416G13Rik |
| 1452016_at   | 0.86004 | arachidonate 5-lipoxygenase activating protein                                        | Alox5ap       |
| 1452017_at   | 0.90529 | SRY-box containing gene 15                                                            | Sox15         |
| 1452018_at   | 0.84681 | "NK2 transcription factor related, locus 6 (Drosophila)"                              | Nkx2-6        |
| 1452019_at   | 0.92338 | cysteine and tyrosine-rich protein 1                                                  | Cyrr1         |
| 1452020_a_at | 1.00605 | Cd27 binding protein (Hindu God of destruction)                                       | Siva          |
| 1452021_a_at | 0.89577 | hairy and enhancer of split 6 (Drosophila)                                            | Hes6          |
| 1452022_at   | 0.95540 | "brain and acute leukemia, cytoplasmic"                                               | Baalc         |
| 1452023_at   | 0.91111 | ankyrin repeat and SOCS box-containing 16                                             | Asb16         |
| 1452024_a_at | 0.92941 | LIM domain binding 1                                                                  | Ldb1          |

1452025\_a\_at 0.76510 zinc finger protein 2 Zfp2  
1452026\_a\_at 0.97742 "phospholipase A2, group XIIA" Pla2g12a  
1452027\_a\_at 0.97944 transformation related protein 63 Trp63  
1452028\_a\_at 1.00965 cadherin 23 (otocadherin) Cdh23  
1452029\_a\_at 0.86421 purine-rich element binding protein G Purg  
1452030\_a\_at 0.99066 heterogeneous nuclear ribonucleoprotein R Hnrpr  
1452031\_at 1.03993 "solute carrier family 1 (glial high affinity glutamate transporter), member 3" Slc1a3  
1452032\_at 0.93258 "protein kinase, cAMP dependent regulatory, type I, alpha" Prkar1a  
1452033\_at 0.93473 GLE1 RNA export mediator-like (yeast) Gle11  
1452034\_at 0.95419 prolyl endopeptidase-like Prepl  
1452035\_at 0.85864 "procollagen, type IV, alpha 1" Col4a1  
1452036\_a\_at 1.04390 thymopoietin Tmpo  
1452037\_at 1.01238 mannoside acetylglucosaminyltransferase 2 Mgat2  
1452038\_at 0.97069 "capping protein (actin filament) muscle Z-line, alpha 1 /// similar to capping protein (actin filament) muscle Z-line, alpha 1" Capza1 /// LOC672255  
1452039\_a\_at 0.94464 Brca1 associated protein 1 Bap1  
1452040\_a\_at 1.01727 cell division cycle associated 3 Cdca3  
1452041\_at 0.90876 kelch-like 26 (Drosophila) Klhl26  
1452042\_a\_at 0.84356 transmembrane protein 144 Tmem144  
1452043\_at 1.02736 RIKEN cDNA 2310011J03 gene 2310011J03Rik  
1452044\_at 0.98691 "actin related protein 2/3 complex, subunit 5-like" Arpc51  
1452045\_at 0.94498 zinc finger protein 281 Zfp281  
1452046\_a\_at 0.96260 "protein phosphatase 1, catalytic subunit, gamma isoform /// similar to protein phosphatase 1 gamma2" Ppp1cc /// LOC434233  
1452047\_at 1.09127 calyculin binding protein Cacybp  
1452048\_at 1.09830 mitochondrial ribosomal protein L12 Mrpl12  
1452049\_at 1.01206 ribosomal protein L7-like 1 Rpl7l1  
1452050\_at 0.89059 calcium/calmodulin-dependent protein kinase ID Camk1d  
1452051\_at 0.94065 ARP3 actin-related protein 3 homolog (yeast) Actr3  
1452052\_s\_at 1.09613 "eukaryotic translation initiation factor 3, subunit 1 alpha" Eif3s1  
1452053\_a\_at 0.91006 transmembrane protein 33 Tmem33  
1452054\_at 0.87541 ubiquitin-conjugating enzyme E2W (putative) Ube2w  
1452055\_at 0.91334 "CTD (carboxy-terminal domain, RNA polymerase II, polypeptide A) small phosphatase 1" Ctdsp1  
1452056\_s\_at 1.04109 "protein phosphatase 3, catalytic subunit, alpha isoform" Ppp3ca  
1452057\_at 1.05898 ARP1 actin-related protein 1 homolog B (yeast) Actr1b  
1452058\_a\_at 0.91547 ring finger protein 11 Rnf11  
1452059\_at 0.99098 "solute carrier family 35, member F5" Slc35f5  
1452060\_a\_at 0.94828 LIM motif-containing protein kinase 2 Limk2  
1452061\_s\_at 0.87020 spermatid perinuclear RNA binding protein Strbp  
1452062\_at 0.94811 phosphoribosyl pyrophosphate synthetase-associated protein 2 Prpsap2  
1452063\_at 0.93329 RIKEN cDNA 2410081M15 gene 2410081M15Rik

1452064\_at 0.91018 "cofactor required for Sp1 transcriptional activation, subunit 3" Crsp3  
 1452065\_at 0.96883 cDNA sequence BC027127 BC027127  
 1452066\_a\_at 0.99080 Nedd4 family interacting protein 2 Ndfip2  
 1452067\_at 0.93046 N-acylsphingosine amidohydrolase (acid ceramidase)-like Asahl  
 1452068\_at 0.94167 N-acylsphingosine amidohydrolase (acid ceramidase)-like Asahl  
 1452069\_a\_at 1.06606 THAP domain containing 7 Thap7  
 1452070\_at 0.95470 death effector domain-containing DNA binding protein 2 Dedd2  
 1452071\_at 0.92843 "solute carrier family 4 (anion exchanger), member 4" Slc4a4  
 1452072\_at 0.98470 myc target 1 Myct1  
 1452073\_at 1.07728 RIKEN cDNA 6720460F02 gene 6720460F02Rik  
 1452074\_at 0.91863 transmembrane protein 135 Tmem135  
 1452075\_at 1.22271 RIKEN cDNA 4933435A13 gene 4933435A13Rik  
 1452076\_at 1.05590 SPRY domain containing 4 Spryd4  
 1452077\_at 0.96066 "DEAD (Asp-Glu-Ala-Asp) box polypeptide 3, Y-linked" Ddx3y  
 1452078\_a\_at 1.30548 "solute carrier family 11 (proton-coupled divalent metal ion transporters), member 2" Slc11a2  
 1452079\_s\_at 1.02677 "DCUN1D1 DCN1, defective in cullin neddylation 1, domain containing 1 (S. cerevisiae)" Dcun1d1  
 1452080\_a\_at 0.98698 "DCUN1D1 DCN1, defective in cullin neddylation 1, domain containing 1 (S. cerevisiae)" Dcun1d1  
 1452081\_a\_at 0.94622 RIKEN cDNA 9130017N09 gene 9130017N09Rik  
 1452082\_at 0.91276 RIKEN cDNA 6430548M08 gene 6430548M08Rik  
 1452083\_a\_at 0.85512 "praja1, RING-H2 motif containing" Pja1  
 1452084\_at 0.99217 "zinc finger, CCHC domain containing 17" Zcchc17  
 1452085\_at 0.89099 GATA zinc finger domain containing 1 Gatad1  
 1452086\_at 1.06120 TRM5 tRNA methyltransferase 5 homolog (S. cerevisiae) Trmt5  
 1452087\_at 0.79281 epithelial stromal interaction 1 (breast) Epsti1  
 1452088\_at 0.83697 "zinc finger, BED domain containing 3" Zbed3  
 1452089\_at 1.00040 "calcium channel, voltage-dependent, beta 4 subunit" Cacnb4  
 1452090\_a\_at 0.97405 olfactomedin 3 Olfm3  
 1452091\_a\_at 1.20369 RNA binding motif protein 28 Rbm28  
 1452092\_at 0.92977 RIKEN cDNA 4631426J05 gene 4631426J05Rik  
 1452093\_at 0.97498 RIKEN cDNA 2500001K11 gene 2500001K11Rik  
 1452094\_at 1.06081 "procollagen-proline, 2-oxoglutarate 4-dioxygenase (proline 4-hydroxylase), alpha 1 polypeptide" P4ha1  
 1452095\_a\_at 0.97598 histocompatibility 47 H47  
 1452096\_s\_at 0.98894 RIKEN cDNA D230025D16 gene D230025D16Rik  
 1452097\_a\_at 0.94012 dual specificity phosphatase 7 /// similar to dual specificity phosphatase 7 Dusp7 /// LOC674944  
 1452098\_at 1.04090 "CTF18, chromosome transmission fidelity factor 18 homolog (S. cerevisiae)" Chtf18  
 1452099\_at 1.25620 expressed sequence AA408296 AA408296  
 1452100\_at 0.98556 Dullard homolog (Xenopus laevis) Dullard



|              |         |                                                                          |               |  |
|--------------|---------|--------------------------------------------------------------------------|---------------|--|
| 1452101_at   | 0.95337 | bleomycin hydrolase                                                      | Blmh          |  |
| 1452102_at   | 0.93115 | "coatamer protein complex, subunit beta 2 (beta prime)"                  | Copb2         |  |
| 1452103_at   | 1.11491 | RIKEN cDNA 2600005N12 gene                                               | 2600005N12Rik |  |
| 1452104_at   | 0.94367 | RIKEN cDNA 2600005N12 gene                                               | 2600005N12Rik |  |
| 1452105_a_at | 0.91376 | tuberous sclerosis 2                                                     | Tsc2          |  |
| 1452106_at   | 0.77801 | nephronectin                                                             | Npnt          |  |
| 1452107_s_at | 0.71527 | Nephronectin                                                             | Npnt          |  |
| 1452108_at   | 0.95902 | insulin-like growth factor I receptor                                    | Igflr         |  |
| 1452109_at   | 0.88960 | interleukin 17 receptor E                                                | Il17re        |  |
| 1452110_at   | 1.06685 | 5-methyltetrahydrofolate-homocysteine methyltransferase reductase        | Mtrr          |  |
| 1452111_at   | 1.00419 | mitochondrial ribosomal protein S35                                      | Mrps35        |  |
| 1452112_a_at | 0.80317 | RNA binding motif protein 4B                                             | Rbm4b         |  |
| 1452113_a_at | 1.22869 | "RAB23, member RAS oncogene family"                                      | Rab23         |  |
| 1452114_s_at | 0.68503 | insulin-like growth factor binding protein 5                             | Igfbp5        |  |
| 1452115_a_at | 1.04485 | polo-like kinase 4 (Drosophila)                                          | Plk4          |  |
| 1452116_s_at | 1.09244 | activating transcription factor 2                                        | Atf2          |  |
| 1452117_a_at | 0.89231 | FYN binding protein                                                      | Fyb           |  |
| 1452118_at   | 1.18755 | RIKEN cDNA 2600005C20 gene                                               | 2600005C20Rik |  |
| 1452119_at   | 1.09842 | RIKEN cDNA 2600005C20 gene                                               | 2600005C20Rik |  |
| 1452120_at   | 0.98487 | N-acetyltransferase 11                                                   | Nat11         |  |
| 1452121_at   | 0.87737 | F-box only protein 22                                                    | Fbxo22        |  |
| 1452122_at   | 1.06172 | expressed sequence AI314180                                              | AI314180      |  |
| 1452123_s_at | 0.98002 | FERM domain containing 4B                                                | Frmd4b        |  |
| 1452124_at   | 0.95609 | "ankyrin 3, epithelial /// RIKEN cDNA 2900054D09 gene"                   | Ank3 ///      |  |
|              |         | 2900054D09Rik                                                            |               |  |
| 1452125_at   | 1.61752 | thyroid hormone receptor associated protein 3                            | Thrap3        |  |
| 1452126_at   | 1.09527 | zinc finger protein 160                                                  | Zfp160        |  |
| 1452127_a_at | 0.88619 | "protein tyrosine phosphatase, non-receptor type 13"                     | Ptpn13        |  |
| 1452128_a_at | 0.98540 | "BRCA1/BRCA2-containing complex, subunit 3"                              | Brcc3         |  |
| 1452129_at   | 1.03895 | parathyroid hormone receptor 2                                           | Pthr2         |  |
| 1452130_at   | 1.00765 | thioredoxin domain containing 14                                         | Txndc14       |  |
| 1452131_at   | 1.14049 | ---                                                                      | ---           |  |
| 1452132_at   | 1.16178 | TLC domain containing 1                                                  | Tlcd1         |  |
| 1452133_at   | 0.93189 | ubiquinol-cytochrome c reductase hinge protein                           | Uqcrh         |  |
| 1452134_at   | 0.83312 | RIKEN cDNA 3010001K23 gene                                               | 3010001K23Rik |  |
| 1452135_at   | 1.00189 | glutathione peroxidase 6                                                 | Gpx6          |  |
| 1452136_at   | 1.06703 | "solute carrier family 5 (sodium/glucose cotransporter), member 9"       | Slc5a9        |  |
| 1452137_at   | 1.00540 | acyl-Coenzyme A binding domain containing 3                              | Acbd3         |  |
| 1452138_a_at | 0.29340 | angiotensin I converting enzyme (peptidyl-dipeptidase A) 2               | Ace2          |  |
| 1452139_at   | 0.92731 | "solute carrier family 35, member C1"                                    | Slc35c1       |  |
| 1452140_at   | 0.93575 | "TBC1 domain family, member 20"                                          | Tbc1d20       |  |
| 1452141_a_at | 0.52554 | "selenoprotein P, plasma, 1"                                             | Sepp1         |  |
| 1452142_at   | 1.07414 | "solute carrier family 6 (neurotransmitter transporter, GABA), member 1" |               |  |

## Slc6a1

1452143\_at 0.98958 spectrin beta 2 Spnb2  
 1452144\_a\_at 0.96304 mitochondrial ribosomal protein L44 Mrpl44  
 1452145\_at 1.06665 hexose-6-phosphate dehydrogenase (glucose 1-dehydrogenase) H6pd  
 1452146\_a\_at 0.96409 "COX15 homolog, cytochrome c oxidase assembly protein (yeast)" Cox15  
 1452147\_at 0.93084 "SEC24 related gene family, member C (S. cerevisiae)" Sec24c  
 1452148\_at 0.67308 low density lipoprotein receptor-related protein associated protein 1 Lrpap1  
 1452149\_at 0.87453 ubiquitin protein ligase E3B Ube3b  
 1452150\_at 0.85101 expressed sequence AU040320 AU040320  
 1452151\_at 0.95204 cDNA sequence BC021523 BC021523  
 1452152\_at 1.02955 clathrin interactor 1 Clint1  
 1452153\_at 0.84576 F-box protein 18 Fbxo18  
 1452154\_at 1.24998 isoleucine-tRNA synthetase Iars  
 1452155\_a\_at 0.88017 DEAD (Asp-Glu-Ala-Asp) box polypeptide 17 Ddx17  
 1452156\_a\_at 0.88483 nischarin Nisch  
 1452157\_at 1.10467 glutamyl-prolyl-tRNA synthetase /// similar to Bifunctional aminoacyl-tRNA  
 synthetase Eprs /// LOC633677  
 1452158\_at 1.16911 glutamyl-prolyl-tRNA synthetase /// similar to Bifunctional aminoacyl-tRNA  
 synthetase Eprs /// LOC633677  
 1452159\_at 0.82000 RIKEN cDNA 2310001A20 gene 2310001A20Rik  
 1452160\_at 1.12058 TCDD-inducible poly(ADP-ribose) polymerase Tiparp  
 1452161\_at 1.00498 TCDD-inducible poly(ADP-ribose) polymerase Tiparp  
 1452162\_at 1.04617 WD repeat domain 48 Wdr48  
 1452163\_at 1.00138 "E26 avian leukemia oncogene 1, 5' domain" Ets1  
 1452164\_at 0.96042 cDNA sequence BC038286 BC038286  
 1452165\_at 1.03127 prolactin-like protein K Prlpk  
 1452166\_a\_at 0.90749 keratin 10 Krt10  
 1452167\_at 1.05476 RIKEN cDNA 2810407C02 gene 2810407C02Rik  
 1452168\_x\_at 0.97548 G1 to S phase transition 1 Gspt1  
 1452169\_a\_at 0.84725 diacylglycerol kinase zeta Dgkz  
 1452170\_at 0.93360 RIKEN cDNA 2010209O12 gene 2010209O12Rik  
 1452171\_at 1.00887 glutamate-rich WD repeat containing 1 Grwd1  
 1452172\_at 0.95348 FAST kinase domains 2 Fastkd2  
 1452173\_at 0.88534 "hydroxyacyl-Coenzyme A dehydrogenase/3-ketoacyl-Coenzyme A thiolase/  
 enoyl-Coenzyme A hydratase (trifunctional protein), alpha subunit" Hadha  
 1452174\_at 1.06524 sterol regulatory element binding factor 2 Srebf2  
 1452175\_at 1.02380 RIKEN cDNA 1810026J23 gene 1810026J23Rik  
 1452176\_at 0.93171 nucleoporin 153 Nup153  
 1452177\_at 0.97049 "ATP-binding cassette, sub-family F (GCN20), member 3" Abcf3  
 1452178\_at 0.94271 "plectin 1 /// similar to poly (ADP-ribose) polymerase family, member 10"  
 Plec1 /// LOC671535  
 1452179\_at 0.78970 PHD finger protein 17 Phf17  
 1452180\_at 0.87787 PHD finger protein 17 Phf17

1452181\_at 0.92220 cytoskeleton-associated protein 4 Ckap4  
1452182\_at 0.80191 UDP-N-acetyl-alpha-D-galactosamine:polypeptide N-acetylgalactosaminyltransferase 2 Galnt2  
1452183\_a\_at 1.06636 "GTL2, imprinted maternally expressed untranslated mRNA" Gtl2  
1452184\_at 1.03727 "NADH dehydrogenase (ubiquinone) 1 beta subcomplex, 9" Ndufb9  
1452185\_at 0.92847 importin 8 Ipo8  
1452186\_at 0.93354 RNA binding motif protein 5 Rbm5  
1452187\_at 0.90396 RNA binding motif protein 5 Rbm5  
1452188\_at 1.07970 mastermind like 1 (Drosophila) Maml1  
1452189\_at 0.98692 WD repeat domain containing 82 Wdr82  
1452190\_at 0.90924 prolylcarboxypeptidase (angiotensinase C) Prcp  
1452191\_at 1.03310 prolylcarboxypeptidase (angiotensinase C) Prcp  
1452192\_at 1.07620 cDNA sequence BC053440 BC053440  
1452193\_a\_at 0.90758 Wiskott-Aldrich syndrome-like (human) Wasl  
1452194\_at 1.04991 tubulin-specific chaperone d Tbcd  
1452195\_s\_at 0.89033 "Sfi1 homolog, spindle assembly associated (yeast) /// similar to spindle assembly associated Sfi1 homolog isoform b" Sfi1 /// LOC673420  
1452196\_a\_at 1.00868 NCK-associated protein 1 Nckap1  
1452197\_at 0.92579 structural maintenance of chromosomes 4 Smc4  
1452198\_at 0.99246 F-box and leucine-rich repeat protein 10 Fbxl10  
1452199\_at 1.06991 RIKEN cDNA 2700094F01 gene 2700094F01Rik  
1452200\_at 1.05251 "DNA segment, Chr 11, ERATO Doi 497, expressed" D11Ert497e  
1452201\_at 0.90577 RIKEN cDNA 2310047B19 gene 2310047B19Rik  
1452202\_at 0.88198 "phosphodiesterase 2A, cGMP-stimulated" Pde2a  
1452203\_at 1.23542 RIKEN cDNA 5830411E10 gene 5830411E10Rik  
1452204\_at 0.97661 ankyrin repeat and SAM domain containing 1 Anks1  
1452205\_x\_at 1.11747 "T-cell receptor beta, joining region /// T-cell receptor beta, variable 13 /// similar to T-cell receptor beta-1 chain C region /// similar to T-cell receptor beta-2 chain C region /// similar to T-cell receptor beta-1 chain C region /// similar to T-cell receptor beta-1 chain C region /// similar to T-cell receptor beta-1 chain C region /// similar to T-cell receptor beta-2 chain C region /// similar to T-cell receptor beta-1 chain C region" Tcrb-J /// Tcrb-V13 /// LOC665500 /// LOC665506 /// LOC669844 /// LOC669847 /// LOC674047 /// LOC674048 /// LOC676782  
1452206\_at 0.97819 "succinate-Coenzyme A ligase, ADP-forming, beta subunit" Sucla2  
1452207\_at 0.94056 "Cbp/p300-interacting transactivator, with Glu/Asp-rich carboxy-terminal domain, 2 /// similar to Cbp/p300-interacting transactivator, with Glu/Asp-rich carboxy-terminal domain, 2" Cited2 /// LOC671495  
1452208\_at 1.21333 PR domain containing 4 Prdm4  
1452209\_at 0.90089 plakophilin 4 Pkp4  
1452210\_at 1.06838 DNA2 DNA replication helicase 2-like (yeast) Dna2l  
1452211\_at 1.12781 "proteasome (prosome, macropain) activator subunit 4" Psme4  
1452212\_at 0.95353 lamin A Lmna  
1452213\_at 1.05183 testis expressed gene 2 Tex2  
1452214\_at 0.90135 SKI-like Skil

1452215\_at 1.09521 RIKEN cDNA 9130401M01 gene 9130401M01Rik  
1452216\_at 0.98774 cDNA sequence BC025519 BC025519  
1452217\_at 1.02029 AHNAK nucleoprotein (desmoyokin) Ahnak  
1452218\_at 0.94278 coiled-coil domain containing 117 Ccdc117  
1452219\_at 1.04631 transmembrane protein 63b Tmem63b  
1452220\_at 0.93652 dedicator of cyto-kinesis 1 Dock1  
1452221\_a\_at 1.00493 CXXC finger 1 (PHD domain) Cxxc1  
1452222\_at 0.99735 utrophin Utrn  
1452223\_s\_at 1.11340 granule cell antiserum positive 14 Gcap14  
1452224\_at 1.10528 microrchidia 3 Morc3  
1452225\_at 0.95597 RIKEN cDNA 2010106G01 gene 2010106G01Rik  
1452226\_at 1.25285 regulator of chromosome condensation 2 Rcc2  
1452227\_at 1.02769 RIKEN cDNA 2310045A20 gene 2310045A20Rik  
1452228\_at 1.01988 "TBC1 domain family, member 23" Tbc1d23  
1452229\_at 0.86174 Calmodulin binding transcription activator 2 Camta2  
1452230\_at 0.95844 "DnaJ (Hsp40) homolog, subfamily C, member 10" Dnajc10  
1452231\_x\_at 1.71246 interferon activated gene 203 Ifi203  
1452232\_at 1.03017 UDP-N-acetyl-alpha-D-galactosamine: polypeptide N-acetylgalactosaminyltransferase 7 Galnt7  
1452233\_at 1.16476 "ATP-binding cassette, sub-family C (CFTR/MRP), member 1" Abcc1  
1452234\_s\_at 0.94119 "DNA segment, Chr 16, Brigham & Women's Genetics 1494 expressed" D16Bwg1494e  
1452235\_at 1.01915 "mannosidase, alpha, class 1B, member 1" Man1b1  
1452236\_at 1.05726 "ATP-binding cassette, sub-family F (GCN20), member 1" Abcf1  
1452237\_at 0.98473 HIV-1 Rev binding protein Hrb  
1452238\_at 1.11893 HIV-1 Rev binding protein Hrb  
1452239\_at 1.02085 "gene trap ROSA 26, Philippe Soriano" Gt(ROSA)26Sor  
1452240\_at 0.94022 "bruno-like 4, RNA binding protein (Drosophila)" Brunol4  
1452241\_at 1.01090 topoisomerase (DNA) II beta binding protein Topbp1  
1452242\_at 1.01389 centrosomal protein 55 Cep55  
1452243\_at 1.05557 "potassium inwardly-rectifying channel, subfamily J, member 14" Kcnj14  
1452244\_at 1.02582 RIKEN cDNA 6330406I15 gene 6330406I15Rik  
1452245\_at 1.00553 neuro-oncological ventral antigen 1 /// similar to neuro-oncological ventral antigen 1 isoform 2 Nova1 /// LOC664883  
1452246\_at 1.05922 osteoclast stimulating factor 1 Ostf1  
1452247\_at 1.04388 "fragile X mental retardation gene 1, autosomal homolog" Fxr1h  
1452248\_at 0.93491 "pleckstrin homology domain containing, family G (with RhoGef domain) member 5" Plekhg5  
1452249\_at 0.61716 prickle like 1 (Drosophila) Prickle1  
1452250\_a\_at 0.80507 "procollagen, type VI, alpha 2" Col6a2  
1452251\_at 0.86364 neurobeachin Nbea  
1452252\_at 1.22245 "UTP20, small subunit (SSU) processome component, homolog (yeast)" Utp20

|              |         |                                                                                                                   |               |
|--------------|---------|-------------------------------------------------------------------------------------------------------------------|---------------|
| 1452253_at   | 1.00586 | cysteine rich transmembrane BMP regulator 1 (chordin like)                                                        | Crim1         |
| 1452254_at   | 0.99197 | myotubularin related protein 9                                                                                    | Mtmr9         |
| 1452255_at   | 1.04749 | F-box protein 38                                                                                                  | Fbxo38        |
| 1452256_at   | 0.98791 | RIKEN cDNA 1110002N22 gene                                                                                        | 1110002N22Rik |
| 1452257_at   | 1.01405 | "3-hydroxybutyrate dehydrogenase, type 1"                                                                         | Bdh1          |
| 1452258_at   | 1.06534 | PHD finger protein 20                                                                                             | Phf20         |
| 1452259_at   | 1.05004 | PHD finger protein 20                                                                                             | Phf20         |
| 1452260_at   | 1.06272 | cell death-inducing DFFA-like effector c                                                                          | Cidec         |
| 1452261_at   | 1.01869 | SNF2 histone linker PHD RING helicase                                                                             | Shprh         |
| 1452262_at   | 1.20866 | "GrpE-like 2, mitochondrial"                                                                                      | Grpel2        |
| 1452263_at   | 1.13176 | "solute carrier family 35, member F4"                                                                             | Slc35f4       |
| 1452264_at   | 0.95279 | tensin like C1 domain-containing phosphatase                                                                      | Tenc1         |
| 1452265_at   | 0.98281 | CLIP associating protein 1                                                                                        | Clasp1        |
| 1452266_at   | 1.09506 | LAS1-like ( <i>S. cerevisiae</i> )                                                                                | Las1l         |
| 1452267_at   | 0.90820 | FLYWCH-type zinc finger 1                                                                                         | Flywch1       |
| 1452268_at   | 1.05936 | RIKEN cDNA 2810485I05 gene                                                                                        | 2810485I05Rik |
| 1452269_at   | 0.97144 | spectrin beta 3                                                                                                   | Spnb3         |
| 1452270_s_at | 1.03317 | cubilin (intrinsic factor-cobalamin receptor)                                                                     | Cubn          |
| 1452271_at   | 0.77150 | xenotropic and polytropic retrovirus receptor 1                                                                   | Xpr1          |
| 1452272_a_at | 1.12208 | "growth factor, erv1 ( <i>S. cerevisiae</i> )-like (augmenter of liver regeneration)"                             | Gfer          |
| 1452273_at   | 1.01368 | expressed sequence AA409316                                                                                       | AA409316      |
| 1452274_at   | 0.97350 | "zinc finger, AN1-type domain 3"                                                                                  | Zfand3        |
| 1452275_at   | 0.88559 | "zinc finger, AN1-type domain 3"                                                                                  | Zfand3        |
| 1452276_at   | 0.95110 | "SWI/SNF-related, matrix-associated actin-dependent regulator of chromatin, subfamily a, containing DEAD/H box 1" | Smarcad1      |
| 1452277_at   | 1.02212 | arylsulfatase G                                                                                                   | Arsg          |
| 1452278_a_at | 0.89418 | "HECT domain and ankyrin repeat containing, E3 ubiquitin protein ligase 1"                                        | Hace1         |
| 1452279_at   | 0.93665 | complement factor properdin                                                                                       | Cfp           |
| 1452280_at   | 1.02693 | "FERM, RhoGEF (Arhgef) and pleckstrin domain protein 1 (chondrocyte-derived)"                                     | Farp1         |
| 1452281_at   | 0.91334 | Son of sevenless homolog 2 ( <i>Drosophila</i> )                                                                  | Sos2          |
| 1452282_at   | 1.05178 | "cofactor required for Sp1 transcriptional activation, subunit 7"                                                 | Crsp7         |
| 1452283_at   | 0.83466 | Ras association (RalGDS/AF-6) domain family 8                                                                     | Rassf8        |
| 1452284_at   | 0.94596 | "protein tyrosine phosphatase, receptor type Z, polypeptide 1"                                                    | Ptprz1        |
| 1452285_a_at | 1.02730 | "eukaryotic translation initiation factor 3, subunit 5 (epsilon)"                                                 | Eif3s5        |
| 1452286_at   | 0.88010 | RIKEN cDNA 5033405K12 gene                                                                                        | 5033405K12Rik |
| 1452287_at   | 0.80088 | "Mus musculus, clone IMAGE:4527696, mRNA"                                                                         | ---           |
| 1452288_at   | 1.05498 | expressed sequence BB128963                                                                                       | BB128963      |
| 1452289_a_at | 1.08464 | ring finger protein 135                                                                                           | Rnf135        |
| 1452290_at   | 0.87493 | transmembrane protein 106B                                                                                        | Tmem106b      |
| 1452291_at   | 0.77836 | "centaurin, delta 1"                                                                                              | Centd1        |

1452292\_at 0.94932 "adaptor-related protein complex 2, beta 1 subunit" Ap2b1  
1452293\_at 1.01793 sorting nexin 19 Snx19  
1452294\_at 0.90894 protocadherin 1 Pcdh1  
1452295\_at 0.67518 similar to Nedd4 WW binding protein 4 /// similar to Nedd4 WW binding protein 4 LOC637870 /// LOC676013  
1452296\_at 1.05808 slit homolog 3 (Drosophila) Slit3  
1452297\_at 0.88698 cyclin T2 Ccnt2  
1452298\_a\_at 0.88636 myosin Vb Myo5b  
1452299\_at 0.97553 WW domain containing E3 ubiquitin protein ligase 1 Wwp1  
1452300\_at 0.90150 RIKEN cDNA 2410005O16 gene 2410005O16Rik  
1452301\_at 1.17074 "aldehyde dehydrogenase 3 family, member B1" Aldh3b1  
1452302\_at 0.88318 Rho guanine nucleotide exchange factor (GEF) 10 Arhgef10  
1452303\_at 0.94839 Rho guanine nucleotide exchange factor (GEF) 10 Arhgef10  
1452304\_a\_at 0.96084 Rho guanine nucleotide exchange factor (GEF) 5 Arhgef5  
1452305\_s\_at 0.95311 RIKEN cDNA 2610510J17 gene 2610510J17Rik  
1452306\_at 1.01136 "zinc finger, FYVE domain containing 26" Zfyve26  
1452307\_at 0.94355 Cdk5 and Abl enzyme substrate 2 Cables2  
1452308\_a\_at 0.93331 "ATPase, Na<sup>+</sup>/K<sup>+</sup> transporting, alpha 2 polypeptide" Atp1a2  
1452309\_at 1.06643 cingulin-like 1 /// similar to cingulin-like 1 isoform 1 Cgnl1 /// LOC677485  
1452310\_at 1.13778 "transcriptional adaptor 2 (ADA2 homolog, yeast)-like" Tada2l  
1452311\_at 0.85861 dimethylglycine dehydrogenase precursor Dmgdh  
1452312\_at 1.00693 RIKEN cDNA 2810002D19 gene 2810002D19Rik  
1452313\_at 0.98802 RIKEN cDNA 5930416I19 gene 5930416I19Rik  
1452314\_at 1.00688 kinesin family member 11 Kif11  
1452315\_at 1.03595 kinesin family member 11 Kif11  
1452316\_at 0.99318 integrator complex subunit 12 Ints12  
1452317\_at 0.92365 Homeo box B9 Hoxb9  
1452318\_a\_at 0.87973 heat shock protein 1B Hspa1b  
1452319\_at 1.18725 zinc finger protein 82 Zfp82  
1452320\_at 0.92868 low density lipoprotein receptor-related protein 2 Lrp2  
1452321\_at 1.18121 bromodomain and WD repeat domain containing 1 Brwd1  
1452322\_a\_at 0.94499 bromodomain and WD repeat domain containing 1 Brwd1  
1452323\_at 0.91317 SPRY domain containing 3 Spryd3  
1452324\_at 1.07331 plasmacytoma variant translocation 1 Pvt1  
1452325\_at 0.96105 transformation related protein 73 Trp73  
1452326\_at 0.95109 RIKEN cDNA 1810010G06 gene 1810010G06Rik  
1452327\_at 0.85005 IQ motif and Sec7 domain 1 Iqsec1  
1452328\_s\_at 0.87729 "praja 2, RING-H2 motif containing" Pja2  
1452329\_at 1.03954 "pleckstrin homology domain containing, family N member 1" Plekhn1  
1452330\_a\_at 0.76045 matrix-remodelling associated 8 Mxra8  
1452331\_s\_at 1.01631 glutamine and serine rich 1 Qser1  
1452332\_at 1.00328 coiled-coil domain containing 85A Ccdc85a  
1452333\_at 0.88275 "SWI/SNF related, matrix associated, actin dependent regulator of chromatin,

## subfamily a, member 2" Smarca2

1452334\_at 1.02606 centromere protein F Cenpf  
 1452335\_at 0.80766 RIKEN cDNA 2810423E13 gene 2810423E13Rik  
 1452336\_at 0.94007 cDNA sequence BC027382 BC027382  
 1452337\_at 0.88399 RIKEN cDNA 4930427A07 gene 4930427A07Rik  
 1452338\_s\_at 0.96273 intersectin 1 (SH3 domain protein 1A) Itsn1  
 1452339\_at 0.86467 "a disintegrin-like and metallopeptidase (reprolysin type) with thrombospondin type 1 motif, 7" Adamts7  
 1452340\_at 1.01167 RIKEN cDNA 6820424L24 gene 6820424L24Rik  
 1452341\_at 1.04324 "enoyl Coenzyme A hydratase, short chain, 1, mitochondrial" Echs1  
 1452342\_at 0.92533 "amyloid beta (A4) precursor protein-binding, family B, member 2" Apbb2  
 1452343\_at 0.89093 "DNA segment, Chr 18, ERATO Doi 653, expressed" D18Ertd653e  
 1452344\_at 1.26995 synaptojanin 2 Synj2  
 1452345\_at 1.01506 leiomodulin 2 (cardiac) Lmod2  
 1452346\_at 0.78718 "UDP-GlcNAc:betaGal beta-1,3-N-acetylglucosaminyltransferase 1" B3gnt1  
 1452347\_at 0.83784 myocyte enhancer factor 2A Mef2a  
 1452348\_s\_at 1.38213 interferon activated gene 203 /// interferon activated gene 204 /// similar to interferon activated gene 205 /// interferon activated gene 205 /// myeloid cell nuclear differentiation antigen /// similar to Interferon-activatable protein 205 (IFI-205) (D3 protein) /// similar to Interferon-activatable protein 204 (Ifi-204) (Interferon-inducible protein p204) /// similar to Interferon-activatable protein 204 (Ifi-204) (Interferon-inducible protein p204) Ifi203 /// Ifi204 /// LOC192690 /// Ifi205 /// Mnda /// LOC640890 /// LOC672547 /// LOC677184  
 1452349\_x\_at 1.26962 interferon activated gene 205 /// myeloid cell nuclear differentiation antigen Ifi205 /// Mnda  
 1452350\_at 1.37181 bromodomain containing 8 Brd8  
 1452351\_at 1.07910 "RIKEN cDNA C030027K23 gene /// poly (ADP-ribose) polymerase family, member 4" C030027K23Rik /// Parp4  
 1452352\_at 0.83907 cytotoxic T lymphocyte-associated protein 2 beta Ctla2b  
 1452353\_at 0.84434 G protein-coupled receptor 155 Gpr155  
 1452354\_at 0.93435 RIKEN cDNA 2810459M11 gene 2810459M11Rik  
 1452355\_at 0.79772 RIKEN cDNA 3322402L07 gene 3322402L07Rik  
 1452356\_at 1.03867 IQ motif containing C Iqcc  
 1452357\_at 0.90901 "glycoprotein Ib, beta polypeptide /// septin 5" Gp1bb /// Sept5  
 1452358\_at 1.00416 retinoic acid induced 2 Rai2  
 1452359\_at 0.85288 expressed sequence AA536743 AA536743  
 1452360\_a\_at 0.89054 "jumonji, AT rich interactive domain 1A (Rbp2 like)" Jarid1a  
 1452361\_at 0.93566 ring finger protein 20 Rnf20  
 1452362\_at 0.96706 tripartite motif protein 16 Trim16  
 1452363\_a\_at 0.88058 "ATPase, Ca++ transporting, cardiac muscle, slow twitch 2" Atp2a2  
 1452364\_at 1.06411 suppressor of zeste 12 homolog (Drosophila) Suz12  
 1452365\_at 0.97587 RIKEN cDNA 4732435N03 gene 4732435N03Rik  
 1452366\_at 0.72782 RIKEN cDNA 4732435N03 gene 4732435N03Rik  
 1452367\_at 1.08195 "coronin, actin binding protein 2A" Coro2a

1452368\_at 1.13203 breakpoint cluster region homolog Bcr  
 1452369\_at 0.99286 "membrane associated guanylate kinase, WW and PDZ domain containing 1" Magi1  
 1452370\_s\_at 0.96499 RIKEN cDNA B230208H17 gene B230208H17Rik  
 1452371\_at 1.00355 "splicing factor, arginine/serine-rich 11" Sfrs11  
 1452372\_at 0.81175 BSD domain containing 1 Bsdcl  
 1452373\_at 0.96931 RIKEN cDNA 1700081L11 gene 1700081L11Rik  
 1452374\_at 1.09484 zinc finger protein 322a Zfp322a  
 1452375\_at 0.99289 "aldehyde dehydrogenase 4 family, member A1" Aldh4a1  
 1452376\_at 0.95534 zinc finger protein 444 Zfp444  
 1452377\_at 1.05885 myeloid/lymphoid or mixed-lineage leukemia 1 Mll1  
 1452378\_at 1.43387 metastasis associated lung adenocarcinoma transcript 1 (non-coding RNA) Malat1  
 1452379\_at 1.06451 autism susceptibility candidate 2 Aut2  
 1452380\_at 0.88571 Eph receptor A7 Epha7  
 1452381\_at 0.70974 cAMP responsive element binding protein 3-like 2 Creb3l2  
 1452382\_at 0.99942 "dynamamin 3, opposite strand" Dnm3os  
 1452383\_at 0.87386 --- ---  
 1452384\_at 0.87501 ectonucleotide pyrophosphatase/phosphodiesterase 3 Enpp3  
 1452385\_at 1.08497 ubiquitin specific peptidase 53 Usp53  
 1452386\_at 1.00385 sal-like 3 (Drosophila) Sall3  
 1452387\_a\_at 0.99952 angiomin like 2 Amotl2  
 1452388\_at 0.89494 heat shock protein 1A Hspa1a  
 1452389\_at 0.91465 "tumor necrosis factor receptor superfamily, member 7" Tnfrsf7  
 1452390\_at 0.88910 EST AA881470 AA881470  
 1452391\_at 0.96119 coxsackievirus and adenovirus receptor Cxadr  
 1452392\_a\_at 1.02156 "WD repeat domain, phosphoinositide interacting 1" Wipi1  
 1452393\_at 1.29450 expressed sequence AI597013 AI597013  
 1452394\_at 1.08914 cysteinyl-tRNA synthetase Cars  
 1452395\_at 0.95761 "mediator of RNA polymerase II transcription, subunit 19 homolog (yeast)" Med19  
 1452396\_at 1.03837 "splicing factor, arginine/serine-rich 15 /// similar to splicing factor, arginine/serine-rich 15" Sfrs15 /// LOC670368  
 1452397\_at 0.91319 RIKEN cDNA 2810474O19 gene 2810474O19Rik  
 1452398\_at 0.84367 "phospholipase C, epsilon 1" Plce1  
 1452399\_at 1.01886 regulator of G-protein signaling 6 Rgs6  
 1452400\_a\_at 1.01579 "homeo box A11, opposite strand transcript" Hoxa11os  
 1452401\_at 0.96223 Wilms' tumour 1-associating protein Wtap  
 1452402\_at 1.06225 Ubiquitin carboxyl-terminal esterase L3 (ubiquitin thiolesterase) Uchl3  
 1452403\_a\_at 0.88019 otoconin 90 Oc90  
 1452404\_at 1.08820 phosphatase and actin regulator 2 Phacr2  
 1452405\_x\_at 0.85187 T-cell receptor alpha chain /// RIKEN cDNA A430107P09 gene TcrA /// A430107P09Rik



1452406\_x\_at 1.13120 erythroid differentiation regulator 1 Erdr1  
1452407\_at 0.81796 sperm associated antigen 4 Spag4  
1452408\_at 1.08092 "G protein-coupled receptor 31, D17Leh66c region" Gpr31c  
1452409\_at 0.88044 glioma tumor suppressor candidate region gene 2 Gltscr2  
1452410\_a\_at 0.89172 feline sarcoma oncogene Fes  
1452411\_at 0.96830 leucine rich repeat containing 1 Lrrc1  
1452412\_at 1.09961 homeo box C8 Hoxc8  
1452413\_at 1.01797 RIKEN cDNA C230081A13 gene C230081A13Rik  
1452414\_s\_at 1.01109 coiled-coil domain containing 86 Ccdc86  
1452415\_at 1.05923 "actinin, alpha 1" Actn1  
1452416\_at 1.19152 "interleukin 6 receptor, alpha" Il6ra  
1452417\_x\_at 0.97518 "immunoglobulin kappa chain, constant region /// immunoglobulin kappa chain variable 28 (V28) /// RIKEN cDNA 2010205A11 gene /// immunoglobulin kappa chain variable 8 (V8)-16" Igk-C /// Igk-V28 /// 2010205A11Rik /// Igk-V8-16  
1452418\_at 1.58365 RIKEN cDNA 1200016E24 gene 1200016E24Rik  
1452419\_at 0.94233 HEAT repeat containing 1 Heatr1  
1452420\_at 1.11510 serine/threonine kinase 32B Stk32b  
1452421\_at 0.89816 homeo box A3 Hoxa3  
1452422\_a\_at 1.10595 U2 small nuclear ribonucleoprotein B Snrpb2  
1452423\_at 0.98534 piccolo (presynaptic cytomatrix protein) Pclo  
1452424\_at 0.96226 G protein-coupled receptor 23 Gpr23  
1452425\_at 0.92636 "tumor necrosis factor receptor superfamily, member 14 (herpesvirus entry mediator)" Tnfrsf14  
1452426\_x\_at 1.08598 Zinc finger protein 236 /// CDNA clone IMAGE:4009820 Zfp236  
1452427\_s\_at 0.95578 protein tyrosine phosphatase-like A domain containing 1 Ptplad1  
1452428\_a\_at 1.20654 beta-2 microglobulin B2m  
1452429\_s\_at 1.03486 "ATP-binding cassette, sub-family F (GCN20), member 1" Abcf1  
1452430\_s\_at 1.04287 "splicing factor, arginine/serine-rich 1 (ASF/SF2)" Sfrs1  
1452431\_s\_at 0.94685 "histocompatibility 2, class II antigen A, alpha /// histocompatibility 2, class II antigen E alpha" H2-Aa /// H2-Ea  
1452432\_at 1.00261 tissue factor pathway inhibitor Tfpi  
1452433\_at 1.22004 --- ---  
1452434\_s\_at 1.11110 DiGeorge syndrome critical region gene 6 Dgcr6  
1452435\_at 0.80828 WD repeat domain 22 Wdr22  
1452436\_at 1.04731 lysyl oxidase-like 2 Loxl2  
1452437\_at 0.92028 RIKEN cDNA 1110021J02 gene 1110021J02Rik  
1452438\_s\_at 1.09591 "TAF4A RNA polymerase II, TATA box binding protein (TBP)-associated factor" Taf4a  
1452439\_s\_at 1.04458 "splicing factor, arginine/serine-rich 2 (SC-35)" Sfrs2  
1452440\_at 1.00826 "tumor necrosis factor (ligand) superfamily, member 12 /// tumor necrosis factor (ligand) superfamily, member 12-member 13" Tnfsf12 /// Tnfsf12-tnfsf13  
1452441\_at 0.88639 PHD finger protein 3 Phf3  
1452442\_at 1.07347 Ubiquitin specific peptidase 13 (isopeptidase T-3) Usp13

1452443\_s\_at 0.97146 helicase with zinc finger domain Helz  
1452444\_at 0.98435 N-ethylmaleimide sensitive fusion protein attachment protein beta Napb  
1452445\_at 1.13911 "solute carrier family 41, member 2" Slc41a2  
1452446\_a\_at 0.93275 RIKEN cDNA 2010008E23 gene 2010008E23Rik  
1452447\_at 0.93106 RIKEN cDNA 0610007P08 gene 0610007P08Rik  
1452448\_at 0.97668 aquarius Aqr  
1452449\_at 0.91344 homeobox containing 1 Hmbox1  
1452450\_at 0.77884 "Atpase, class I, type 8B, member 2" Atp8b2  
1452451\_at 0.93443 "brain expressed, associated with Nedd4" Bean  
1452452\_at 0.91819 "PREDICTED: Mus musculus hypothetical protein LOC626156 (LOC626156), mRNA" ---  
1452453\_a\_at 0.99923 calcium/calmodulin-dependent protein kinase II alpha Camk2a  
1452454\_at 1.21636 SDA1 domain containing 1 Sdad1  
1452455\_at 1.00291 "fer-1-like 3, myoferlin (C. elegans)" Fer113  
1452456\_at 0.94958 nuclear receptor interacting protein 2 Nrip2  
1452457\_a\_at 0.90860 "protein kinase, AMP-activated, beta 1 non-catalytic subunit" Prkab1  
1452458\_s\_at 1.12937 peptidylprolyl isomerase (cyclophilin) like 5 Ppil5  
1452459\_at 0.95593 "asp (abnormal spindle)-like, microcephaly associated (Drosophila)" Aspm  
1452460\_at 0.92293 ankyrin repeat domain 26 /// similar to ankyrin repeat domain 26  
Ankrd26 /// LOC669838  
1452461\_a\_at 0.95452 "N-acetylglucosamine-1-phosphate transferase, alpha and beta subunits"  
Gnptab  
1452462\_a\_at 0.96499 Btg3 associated nuclear protein Banp  
1452463\_x\_at 0.92331 Immunoglobulin kappa chain complex ---  
1452464\_a\_at 0.91076 methionine aminopeptidase-like 1 Metap11  
1452465\_at 1.01101 "myosin, heavy polypeptide 1, skeletal muscle, adult" Myh1  
1452466\_a\_at 0.99387 RNA binding motif protein 6 Rbm6  
1452467\_at 1.25130 methylmalonic aciduria (cobalamin deficiency) type B homolog (human)  
Mmab  
1452468\_s\_at 1.05257 methylmalonic aciduria (cobalamin deficiency) type B homolog (human)  
Mmab  
1452469\_a\_at 0.89774 smoothelin Smtn  
1452470\_at 0.97947 centrosomal protein 350 Cep350  
1452471\_at 1.30121 interleukin 17 receptor D Il17rd  
1452472\_at 0.98894 receptor transporter protein 3 Rtp3  
1452473\_at 1.02824 RIKEN cDNA E130201N16 gene E130201N16Rik  
1452474\_a\_at 1.05306 ADP-ribosyltransferase 3 Art3  
1452475\_at 0.96722 proprotein convertase subtilisin/kexin type 5 Pcsk5  
1452476\_at 0.82867 "calcium channel, voltage-dependent, beta 2 subunit" Cacnb2  
1452477\_at 1.11259 RIKEN cDNA 3110057O12 gene 3110057O12Rik  
1452478\_at 0.83907 alpha-kinase 2 Alpk2  
1452479\_at 0.94615 "coatamer protein complex, subunit gamma 2, antisense 2" Copg2as2  
1452480\_at 0.96382 cDNA sequence BC024760 BC024760

1452481\_at 0.88905 "phospholipase C, beta 2" Plcb2  
1452482\_at 1.05684 v-erb-b2 erythroblastic leukemia viral oncogene homolog 3 (avian) Erbb3  
1452483\_a\_at 1.18999 CD44 antigen Cd44  
1452484\_at 0.86815 carbonic anhydrase 7 Car7  
1452485\_at 0.89002 "phosphatase, orphan 1" Phospho1  
1452486\_a\_at 0.87937 "crystallin, alpha A" Cryaa  
1452487\_x\_at 0.87796 paired-Ig-like receptor A2 Pira2  
1452488\_at 0.95296 --- ---  
1452489\_at 1.06686 vacuolar protein sorting 11 (yeast) Vps11  
1452490\_a\_at 1.09210 "adaptor protein complex AP-2, alpha 2 subunit" Ap2a2  
1452491\_at 0.94455 RIKEN cDNA 2900060N18 gene 2900060N18Rik  
1452492\_a\_at 0.99247 "solute carrier family 37 (glycerol-3-phosphate transporter), member 2" Slc37a2  
1452493\_s\_at 1.00670 homeo box B8 Hoxb8  
1452494\_s\_at 0.86019 "solute carrier organic anion transporter family, member 1b2" Slco1b2  
1452495\_at 1.08214 a disintegrin and metallopeptidase domain 28 Adam28  
1452496\_at 0.89215 "Atpase, class VI, type 11C" Atp11c  
1452497\_a\_at 1.14680 "nuclear factor of activated T-cells, cytoplasmic, calcineurin-dependent 3" Nfatc3  
1452498\_at 1.04691 G patch domain containing 2 Gpatc2  
1452499\_a\_at 0.96379 kinesin family member 2A Kif2a  
1452500\_at 1.32259 "trimethyllysine hydroxylase, epsilon" Tmlhe  
1452501\_at 0.99276 "cytochrome P450, family 2, subfamily c, polypeptide 38" Cyp2c38  
1452502\_at 1.00589 small EDRK-rich factor 1 Serf1  
1452503\_a\_at 0.97246 bromodomain and WD repeat domain containing 1 Brwd1  
1452504\_s\_at 0.90135 "chitobiase, di-N-acetyl-" Ctbs  
1452505\_at 1.01639 "laminin, gamma 2" Lamc2  
1452506\_a\_at 1.04517 integrin-linked kinase-associated serine/threonine phosphatase 2C Ilkap  
1452507\_at 0.98383 distal-less homeobox 6 Dlx6  
1452508\_x\_at 1.05004 RIKEN cDNA 2610009E16 gene 2610009E16Rik  
1452509\_at 0.90472 "ubiquitin specific peptidase 9, Y chromosome" Usp9y  
1452510\_at 1.03455 paired box gene 7 Pax7  
1452511\_at 0.79516 SRY-box containing gene 5 Sox5  
1452512\_a\_at 0.96963 "ankyrin 1, erythroid" Ank1  
1452513\_a\_at 0.96041 "Fanconi anemia, complementation group A" Fanca  
1452514\_a\_at 0.97912 kit oncogene Kit  
1452515\_a\_at 0.92133 xylosyltransferase II Xylt2  
1452516\_at 1.05482 sperm motility kinase 2-like /// RIKEN cDNA 4931427P12 gene  
LOC545814 /// 4931427P12Rik  
1452517\_at 1.11220 "pleckstrin homology domain containing, family H (with MyTH4 domain)  
member 1" Plekhh1  
1452518\_a\_at 1.05247 IL2-inducible T-cell kinase Itk  
1452519\_a\_at 0.70540 zinc finger protein 36 Zfp36

1452520\_a\_at 1.04098 "cholinergic receptor, nicotinic, gamma polypeptide" Chrng  
1452521\_a\_at 1.11232 "plasminogen activator, urokinase receptor" Plaur  
1452522\_at 0.94072 stomatin Stom  
1452523\_a\_at 1.05407 RIKEN cDNA 4930527D15 gene 4930527D15Rik  
1452524\_a\_at 0.96138 "ELAV (embryonic lethal, abnormal vision, Drosophila)-like 3 (Hu antigen C)" Elavl3  
1452525\_a\_at 1.09774 neurofibromatosis 1 Nf1  
1452526\_a\_at 0.94046 paired box gene 6 Pax6  
1452527\_a\_at 1.09269 "purinergic receptor P2X, ligand-gated ion channel 4" P2rx4  
1452528\_a\_at 0.93117 "NK2 transcription factor related, locus 3 (Drosophila)" Nkx2-3  
1452529\_a\_at 0.95439 cAMP responsive element binding protein 1 Creb1  
1452530\_a\_at 1.06654 runt related transcription factor 1 Runx1  
1452531\_at 1.02679 runt related transcription factor 1 Runx1  
1452532\_x\_at 0.97331 CEA-related cell adhesion molecule 1 Ceacam1  
1452533\_at 0.84887 ryanodine receptor 3 Ryr3  
1452534\_a\_at 0.98512 high mobility group box 2 /// similar to High mobility group protein 2 (HMG-2) /// high mobility group box 2 /// high mobility group box 2 Hmgb2 /// LOC433785 /// LOC678110 /// LOC678341  
1452535\_at 0.92379 Immunoglobulin heavy chain 1a (serum IgG2a) Igh-1a  
1452536\_s\_at 1.00678 immunoglobulin kappa chain variable 1 (V1) Igh-V1  
1452537\_at 0.88576 immunoglobulin kappa chain variable 1 (V1) Igh-V1  
1452538\_at 1.08010 Immunoglobulin heavy chain 1a (serum IgG2a) Igh-1a  
1452539\_a\_at 1.00874 CD247 antigen Cd247  
1452540\_a\_at 1.10045 "histone 1, H2bc /// histone 1, H2be /// histone 1, H2bl /// histone 1, H2bm /// histone 1, H2bp /// similar to Histone H2B F (H2B 291A) /// similar to Histone H2B F (H2B 291A) /// similar to Histone H2B F (H2B 291A)" Hist1h2bc /// Hist1h2be /// Hist1h2bl /// Hist1h2bm /// Hist1h2bp /// LOC665596 /// LOC665622 /// LOC671645  
1452541\_at 0.92168 erythrocyte protein band 4.1-like 2 Epb4.112  
1452542\_x\_at 0.87423 transcription factor E2a Tcfe2a  
1452543\_a\_at 1.04714 "secretoglobin, family 1A, member 1 (uteroglobin)" Scgb1a1  
1452544\_x\_at 2.03087 "histocompatibility 2, D region locus 1" H2-D1  
1452545\_a\_at 0.91819 integrin beta 1 (fibronectin receptor beta) Itgb1  
1452546\_x\_at 1.02334 defensin beta 11 Defb11  
1452547\_s\_at 0.97198 "histocompatibility 2, T region locus 18 /// similar to histocompatibility 2, T region locus 3 /// similar to histocompatibility 2, T region locus 3" H2-T18 /// LOC633417 /// LOC674370  
1452548\_x\_at 0.99487 "histocompatibility 2, T region locus 18 /// histocompatibility 2, T region locus 3 /// similar to histocompatibility 2, T region locus 3 /// MHC class I antigen /// similar to histocompatibility 2, T region locus 3 /// similar to histocompatibility 2, T region locus 3" H2-T18 /// H2-T3 /// H2-Tw3 /// H2-T3-like /// LOC633417 /// LOC674370  
1452549\_at 1.02969 "gene model 1549, (NCBI)" Gm1549  
1452550\_a\_at 0.92947 fragile X mental retardation syndrome 1 homolog Fmr1  
1452551\_at 1.24285 --- ---

1452552\_at 0.98463 neoplastic progression 2 Npn2  
1452553\_at 0.99274 "Mus musculus, clone IMAGE:5068294" ---  
1452554\_at 0.89071 "Strain DBA/2J thiopurine S-methyltransferase (Tpmt) pseudogene, mRNA sequence" ---  
1452555\_at 0.91220 hypothetical protein LOC667141 /// hypothetical protein LOC671961 /// hypothetical protein LOC675420 LOC667141 /// LOC671961 /// LOC675420  
1452556\_at 0.88043 "Envelope protein, mRNA sequence" ---  
1452557\_a\_at 1.07021 --- ---  
1452558\_at 0.90166 "T-cell receptor gamma-chain mRNA V4-J1 region, 3' end" ---  
1452559\_at 1.02730 --- ---  
1452560\_a\_at 1.01257 nuclear transcription factor-Y alpha Nfya  
1452561\_at 0.92307 Latrophilin 3 Lphn3  
1452562\_at 0.88593 "jumonji, AT rich interactive domain 1D (Rbp2 like)" Jarid1d  
1452563\_a\_at 0.91968 "jumonji, AT rich interactive domain 1D (Rbp2 like)" Jarid1d  
1452564\_at 0.94395 oncofetal antigen Ofa  
1452565\_x\_at 0.96571 hypothetical protein LOC641050 LOC641050  
1452566\_at 1.04434 --- ---  
1452567\_at 0.98935 granule cell antiserum positive 8 Gcap8  
1452568\_at 1.07435 granule cell antiserum positive 8 Gcap8  
1452569\_at 1.00063 "solute carrier organic anion transporter family, member 1b2" Slco1b2  
1452570\_at 0.93478 "DNA segment, KIST 5" D0Kist5  
1452571\_at 1.01328 "tubulin alpha, related sequence 1" Tuba-rs1  
1452572\_at 0.89620 calcium/calmodulin-dependent protein kinase IV Camk4  
1452573\_a\_at 0.91486 stretch responsive protein 278 Sr278  
1452574\_x\_at 0.92188 Immunoglobulin heavy chain (J558 family) Igh-VJ558  
1452575\_at 1.03533 keratin associated protein 6-3 Krtap6-3  
1452576\_at 0.97290 Immunoglobulin heavy chain complex Igh  
1452577\_at 1.04728 Immunoglobulin heavy chain complex Igh  
1452578\_at 1.15024 runt related transcription factor 1 Runx1  
1452579\_at 0.91660 NifU-like N-terminal domain containing Nifun  
1452580\_a\_at 0.99627 mitochondrial ribosomal protein L21 Mrpl21  
1452581\_at 1.03491 RIKEN cDNA 2610304G08 gene 2610304G08Rik  
1452582\_at 0.84596 galactose mutarotase Galm  
1452583\_s\_at 0.90212 galactose mutarotase Galm  
1452584\_at 1.02904 RIKEN cDNA 1500032L24 gene 1500032L24Rik  
1452585\_at 1.06865 mitochondrial ribosomal protein S28 Mrps28  
1452586\_at 0.91318 anaphase promoting complex subunit 13 Anapc13  
1452587\_at 1.09955 ARP2 actin-related protein 2 homolog (yeast) Actr2  
1452588\_at 1.03855 zinc finger protein 688 Zfp688  
1452589\_at 0.91520 PTK7 protein tyrosine kinase 7 Ptk7  
1452590\_a\_at 1.04071 placenta specific 9 Plac9  
1452591\_a\_at 1.00850 RIKEN cDNA 2410018G20 gene 2410018G20Rik  
1452592\_at 1.02205 microsomal glutathione S-transferase 2 Mgst2

1452593\_a\_at 1.06205 "transcription elongation factor B (SIII), polypeptide 1" Tceb1  
 1452594\_at 1.11986 dual specificity phosphatase 11 (RNA/RNP complex 1-interacting) Dusp11  
 1452595\_at 1.14209 "a disintegrin-like and metallopeptidase (reprolysin type) with thrombospondin  
 type 1 motif, 4" Adamts4  
 1452596\_at 0.90220 polymerase (RNA) II (DNA directed) polypeptide K Polr2k  
 1452597\_at 0.92480 RIKEN cDNA 2310061C15 gene 2310061C15Rik  
 1452598\_at 1.04549 GINS complex subunit 1 (Psf1 homolog) Gins1  
 1452599\_s\_at 1.24875 expressed sequence AI413582 AI413582  
 1452600\_at 0.99178 "TAF6-like RNA polymerase II, p300/CBP-associated factor (PCAF)-  
 associated factor" Taf6l  
 1452601\_a\_at 0.97466 acyl-Coenzyme A binding domain containing 6 Acbd6  
 1452602\_a\_at 0.95312 RIKEN cDNA 1700001C19 gene 1700001C19Rik  
 1452603\_at 0.99770 RIKEN cDNA 5330431N19 gene 5330431N19Rik  
 1452604\_at 1.06416 serologically defined colon cancer antigen 13 Stard13  
 1452605\_at 0.90221 threonine synthase-like 1 (bacterial) Thns11  
 1452606\_at 1.20813 meiotic nuclear divisions 1 homolog (*S. cerevisiae*) Mnd1  
 1452607\_at 0.97104 RIKEN cDNA 2610030H06 gene 2610030H06Rik  
 1452608\_at 0.91449 c-myc binding protein Mycbp  
 1452609\_at 0.63983 RIKEN cDNA 1190005I06 gene 1190005I06Rik  
 1452610\_at 0.99907 zinc finger protein 99 Zfp99  
 1452611\_at 0.96523 zinc finger protein 294 Zfp294  
 1452612\_at 1.12315 zinc finger protein 294 Zfp294  
 1452613\_at 0.88262 "ubiquinol-cytochrome c reductase, complex III subunit VII" Uqcrcq  
 1452614\_at 1.28977 "gene model 566, (NCBI)" Gm566  
 1452615\_s\_at 0.87079 tRNA phosphotransferase 1 Trpt1  
 1452616\_s\_at 1.11506 single-stranded DNA binding protein 1 Ssbp1  
 1452617\_at 0.93237 single-stranded DNA binding protein 1 Ssbp1  
 1452618\_at 0.98961 CDK5 regulatory subunit associated protein 2 Cdk5rap2  
 1452619\_a\_at 0.85158 ATP/GTP binding protein-like 3 Agbl3  
 1452620\_at 0.94435 phosphoenolpyruvate carboxykinase 2 (mitochondrial) Pck2  
 1452621\_at 0.91939 pterin 4 alpha carbinolamine dehydratase/dimerization cofactor of hepatocyte  
 nuclear factor 1 alpha (TCF1) 2 Pcbd2  
 1452622\_a\_at 0.98225 TNFRSF1A-associated via death domain Tradd  
 1452623\_at 0.87259 zinc finger protein 759 Zfp759  
 1452624\_at 1.05355 leucine rich repeat transmembrane neuronal 1 Lrrtm1  
 1452625\_at 0.94266 potassium channel tetramerisation domain containing 2 Kctd2  
 1452626\_a\_at 0.86179 RIKEN cDNA 1810014F10 gene 1810014F10Rik  
 1452627\_at 0.99603 SUMO/sentrin specific peptidase 6 Senp6  
 1452628\_at 0.95247 BCL2-associated athanogene 5 Bag5  
 1452629\_at 1.11895 scaffold attachment factor B2 Safb2  
 1452630\_at 1.01043 triggering receptor expressed on myeloid cells-like 1 Trem11  
 1452631\_at 0.88823 RUN and FYVE domain-containing 2 Rufy2  
 1452632\_at 0.97847 hypothetical protein LOC637741 LOC637741

1452633\_s\_at 1.01615 hypothetical protein LOC637741 LOC637741  
1452634\_at 0.87074 oocyte specific homeobox 3 Obox3  
1452635\_x\_at 1.01649 Josephin domain containing 3 Josd3  
1452636\_x\_at 0.96317 GTP binding protein 5 Gtpbp5  
1452637\_a\_at 1.18535 bolA-like 1 (E. coli) Bolal  
1452638\_s\_at 0.92073 dynamin 1-like Dnm1l  
1452639\_at 0.99040 ectonucleotide pyrophosphatase/phosphodiesterase 4 Enpp4  
1452640\_at 1.03539 RIKEN cDNA 3110007F17 gene /// hypothetical LOC546368 /// hypothetical  
LOC625591 3110007F17Rik /// LOC546368 /// LOC625591  
1452641\_at 0.94667 cDNA sequence BC028663 BC028663  
1452642\_at 1.04905 Transmembrane protein 16F Tmem16f  
1452643\_at 1.08392 grainyhead-like 2 (Drosophila) Grhl2  
1452644\_at 1.00513 methyl-CpG binding domain protein 3-like 2 Mbd3l2  
1452645\_x\_at 0.95074 "killer cell lectin-like receptor subfamily A, member 22" Klra22  
1452646\_at 0.79621 tumor protein p53 inducible nuclear protein 2 Trp53inp2  
1452647\_a\_at 1.00895 DPH2 homolog (S. cerevisiae) Dph2  
1452648\_at 1.07586 transforming growth factor beta regulated gene 1 Tbrg1  
1452649\_at 0.93767 reticulon 4 Rtn4  
1452650\_at 1.02135 tripartite motif-containing 62 Trim62  
1452651\_a\_at 0.97086 "myosin, light polypeptide 1" Myl1  
1452652\_at 1.09991 transmembrane protein 158 Tmem158  
1452653\_at 0.97491 "solute carrier family 25 (mitochondrial carrier, glutamate), member 22"  
Slc25a22  
1452654\_at 0.88428 --- ---  
1452655\_at 0.71408 "zinc finger, DHHC domain containing 2" Zdhhc2  
1452656\_at 0.88479 "zinc finger, DHHC domain containing 2" Zdhhc2  
1452657\_at 0.92374 "adaptor-related protein complex 1, sigma 2 subunit" Ap1s2  
1452658\_at 1.07723 "KRR1, small subunit (SSU) processome component, homolog (yeast)" Krr1  
1452659\_at 0.93580 DEK oncogene (DNA binding) Dek  
1452660\_s\_at 0.93320 kelch-like 7 (Drosophila) Klhl7  
1452661\_at 1.09130 transferrin receptor Tfrc  
1452662\_a\_at 1.09475 "eukaryotic translation initiation factor 2, subunit 1 alpha" Eif2s1  
1452663\_at 0.98431 SV2 related protein Svop  
1452664\_a\_at 0.83838 transmembrane 7 superfamily member 3 Tm7sf3  
1452665\_at 0.94923 tetratricopeptide repeat domain 27 Ttc27  
1452666\_a\_at 0.90387 transmembrane and coiled-coil domains 2 Tmcc2  
1452667\_at 0.93192 "RAB2B, member RAS oncogene family" Rab2b  
1452668\_x\_at 0.95104 "RAB2B, member RAS oncogene family" Rab2b  
1452669\_at 0.88693 RIKEN cDNA 2810012G03 gene 2810012G03Rik  
1452670\_at 0.65477 "myosin, light polypeptide 9, regulatory" Myl9  
1452671\_s\_at 0.87073 "lectin, mannose-binding, 1" Lman1  
1452672\_at 1.01886 THO complex 5 Thoc5  
1452673\_at 0.93620 RAN binding protein 3 Ranbp3

1452674\_a\_at 0.99195 "eukaryotic translation initiation factor 3, subunit 12" Eif3s12  
1452675\_at 1.02425 RNA binding motif protein 22 Rbm22  
1452676\_a\_at 0.99515 polyribonucleotide nucleotidyltransferase 1 Pnpt1  
1452677\_at 0.96604 polyribonucleotide nucleotidyltransferase 1 /// similar to polyribonucleotide nucleotidyltransferase 1 /// similar to polyribonucleotide nucleotidyltransferase 1 Pnpt1 ///  
LOC635551 /// LOC641190  
1452678\_a\_at 1.04482 cysteine conjugate-beta lyase 1 Ccbl1  
1452679\_at 1.14925 "tubulin, beta 2b" Tubb2b  
1452680\_at 1.08266 small nuclear ribonucleoprotein D2 Snrpd2  
1452681\_at 1.01818 deoxythymidylate kinase Dtymk  
1452682\_at 1.03393 RIKEN cDNA 4632404H22 gene 4632404H22Rik  
1452683\_at 1.07010 "DnaJ (Hsp40) homolog, subfamily C, member 8 /// similar to DnaJ (Hsp40) homolog, subfamily C, member 8 (predicted)" Dnajc8 /// LOC669266  
1452684\_at 0.95089 AKT1 substrate 1 (proline-rich) Akt1s1  
1452685\_at 0.97181 RIKEN cDNA 0610009O20 gene 0610009O20Rik  
1452686\_s\_at 0.91787 "DNA segment, Chr 4, ERATO Doi 196, expressed" D4ErtD196e  
1452687\_at 1.03052 "dihydrouridine synthase 2-like (SMM1, S. cerevisiae)" Dus2l  
1452688\_at 0.93418 PRP39 pre-mRNA processing factor 39 homolog (yeast) Prpf39  
1452689\_at 0.97593 zinc finger protein 512 Zfp512  
1452690\_at 1.10022 KH-type splicing regulatory protein Khgrp  
1452691\_at 0.97992 RNA binding motif protein 17 Rbm17  
1452692\_a\_at 0.97843 NADH dehydrogenase (ubiquinone) flavoprotein 2 Ndufv2  
1452693\_at 0.91297 DEAH (Asp-Glu-Ala-His) box polypeptide 35 Dhx35  
1452694\_at 0.83174 inositol hexaphosphate kinase 1 Ihpk1  
1452695\_at 0.96285 RIKEN cDNA 1810033M07 gene 1810033M07Rik  
1452696\_a\_at 1.09272 RIKEN cDNA 4933439C10 gene 4933439C10Rik  
1452697\_at 1.07933 "CTD (carboxy-terminal domain, RNA polymerase II, polypeptide A) phosphatase, subunit 1" Ctdp1  
1452698\_at 0.97864 "Ts translation elongation factor, mitochondrial" Tsfm  
1452699\_at 0.95842 methyltransferase 11 domain containing 1 Mett11d1  
1452700\_s\_at 0.82136 kelch repeat and BTB (POZ) domain containing 7 Kbtbd7  
1452701\_x\_at 1.00654 ubiquitin A-52 residue ribosomal protein fusion product 1 /// similar to ubiquitin A-52 residue ribosomal protein fusion product 1 /// similar to ubiquitin A-52 residue ribosomal protein fusion product 1 /// similar to ubiquitin A-52 residue ribosomal protein fusion product 1 Uba52 /// LOC666586 /// LOC669193 /// LOC676687  
1452702\_at 1.00891 chloride channel 7 Clcn7  
1452703\_at 0.91453 RIKEN cDNA 4631427C17 gene 4631427C17Rik  
1452704\_at 1.00624 RIKEN cDNA 1200015F23 gene 1200015F23Rik  
1452705\_at 1.04853 RIKEN cDNA 2210010A19 gene 2210010A19Rik  
1452706\_a\_at 1.01298 RIKEN cDNA 1700027J05 gene 1700027J05Rik  
1452707\_at 0.74537 RIKEN cDNA 4631423F02 gene 4631423F02Rik  
1452708\_a\_at 0.97423 Luc7 homolog (S. cerevisiae)-like Luc7l  
1452709\_at 1.00649 "polymerase (DNA-directed), delta interacting protein 3" Poldip3



1452710\_at 1.08340 RNA pseudouridylate synthase domain containing 4 Rpusd4  
1452711\_at 0.80064 spastic paraplegia 3A homolog (human) Spg3a  
1452712\_at 0.95692 heterogeneous nuclear ribonucleoprotein A3 Hnrpa3  
1452713\_a\_at 1.03547 WD repeat domain 57 (U5 snRNP specific) Wdr57  
1452714\_at 1.00098 "tetratricopeptide repeat, ankyrin repeat and coiled-coil containing 1" Tanc1  
1452715\_at 1.00783 RIKEN cDNA 2310022K01 gene 2310022K01Rik  
1452716\_at 0.98562 RIKEN cDNA 5730469M10 gene 5730469M10Rik  
1452717\_at 1.06646 "solute carrier family 25 (mitochondrial carrier, phosphate carrier), member 24" Slc25a24  
1452718\_at 1.02834 "E3 ubiquitin protein ligase, HECT domain containing, 1" Edd1  
1452719\_at 0.93155 --- ---  
1452720\_a\_at 0.97401 FIP1 like 1 (S. cerevisiae) Fip111  
1452721\_a\_at 1.07514 coiled-coil domain containing 53 Ccdc53  
1452722\_a\_at 0.96702 cullin 5 Cul5  
1452723\_at 1.08084 Kruppel-like factor 9 Klf9  
1452724\_at 0.94039 "protein phosphatase 1, regulatory (inhibitor) subunit 16A" Ppp1r16a  
1452725\_a\_at 1.03589 "ribonuclease H2, large subunit" Rnaseh2a  
1452726\_a\_at 1.04466 NOP17 Nop17  
1452727\_at 0.90766 R3H domain containing 2 R3hdm2  
1452728\_at 0.87005 kin of IRRE like 3 (Drosophila) Kirrel3  
1452729\_at 0.99083 dolichyl-phosphate mannosyltransferase polypeptide 3 Dpm3  
1452730\_at 0.96193 RIKEN cDNA 1110033J19 gene 1110033J19Rik  
1452731\_x\_at 1.03516 hypothetical protein LOC544988 /// RIKEN cDNA B930046C15 gene ///  
hypothetical protein LOC545007 /// RIKEN cDNA 2610042L04 gene /// similar to Spetex-2F protein ///  
similar to Spetex-2H protein /// similar to Spetex-2H protein /// hypothetical protein LOC664825 ///  
similar to Spetex-2F protein /// similar to Spetex-2H protein /// similar to Spetex-2H protein /// similar to  
Spetex-2H protein /// hypothetical protein LOC666772 /// hypothetical protein LOC671957  
LOC544988 /// B930046C15Rik /// LOC545007 /// 2610042L04Rik /// LOC622916 /// LOC622931 ///  
LOC638853 /// LOC664825 /// LOC666193 /// LOC666329 /// LOC666442 /// LOC666684 ///  
LOC666772 /// LOC671957  
1452732\_at 1.03240 RIKEN cDNA 2300003P22 gene 2300003P22Rik  
1452733\_at 0.93346 pantothenate kinase 2 (Hallervorden-Spatz syndrome) Pank2  
1452734\_at 0.93884 ribonuclease T2 Rnaset2  
1452735\_at 1.06931 PEST proteolytic signal containing nuclear protein Pcnp  
1452736\_at 0.82372 R3H domain and coiled-coil containing 1 R3hcc1  
1452737\_at 0.90344 RIKEN cDNA 2810008M24 gene 2810008M24Rik  
1452738\_at 0.91438 stomatin-like 1 Stoml1  
1452739\_at 1.06188 F-box only protein 7 Fbxo7  
1452740\_at 0.83229 "myosin, heavy polypeptide 10, non-muscle" Myh10  
1452741\_s\_at 1.01762 "glycerol phosphate dehydrogenase 2, mitochondrial" Gpd2  
1452742\_at 0.83732 "trafficking protein, kinesin binding 1" Trak1  
1452743\_at 0.97303 --- ---  
1452744\_at 0.86168 RIKEN cDNA 2210016F16 gene 2210016F16Rik

1452745\_at 0.86273 RIKEN cDNA 1810044A24 gene 1810044A24Rik  
1452746\_at 0.91375 ATPase type 13A2 Atp13a2  
1452747\_at 1.00348 ATPase type 13A2 /// similar to ATPase type 13A2 Atp13a2 /// LOC676620  
1452748\_at 0.97950 X-ray repair complementing defective repair in Chinese hamster cells 3 Xrcc3  
1452749\_at 0.91911 PAP associated domain containing 1 Papd1  
1452750\_at 0.79752 RIKEN cDNA 5530601H04 gene 5530601H04Rik  
1452751\_at 0.96500 early B-cell factor 3 Ebf3  
1452752\_at 0.74790 leprecan 1 Lepre1  
1452753\_at 1.08945 forkhead box K2 Foxk2  
1452754\_at 0.93337 cysteine-rich with EGF-like domains 2 Creld2  
1452755\_at 1.00733 --- ---  
1452756\_at 0.85392 RIKEN cDNA 0610009J22 gene 0610009J22Rik  
1452757\_s\_at 0.99033 "hemoglobin alpha, adult chain 1" Hba-a1  
1452758\_s\_at 0.99742 "eukaryotic translation initiation factor 4, gamma 2" Eif4g2  
1452759\_s\_at 0.97454 "PTPRF interacting protein, binding protein 1 (liprin beta 1)" Ppfibp1  
1452760\_at 0.98777 RIKEN cDNA 2510012J08 gene 2510012J08Rik  
1452761\_a\_at 0.92057 RIKEN cDNA 8430436O14 gene 8430436O14Rik  
1452762\_at 0.80551 RIKEN cDNA 8430436O14 gene 8430436O14Rik  
1452763\_at 0.86665 non imprinted in Prader-Willi/Angelman syndrome 1 homolog (human)  
Nipa1  
1452764\_at 0.88974 suppressor of cytokine signaling 6 Socs6  
1452765\_at 0.94867 "similar to solute carrier family 39 (zinc transporter), member 9" LOC674308  
1452766\_at 1.02324 RIKEN cDNA 2900041A09 gene 2900041A09Rik  
1452767\_at 1.09529 ribosome binding protein 1 Rrbp1  
1452768\_at 0.93966 testis expressed gene 261 Tex261  
1452769\_at 0.99512 RIKEN cDNA 3732413I11 gene 3732413I11Rik  
1452770\_at 0.96150 "vitamin K epoxide reductase complex, subunit 1" Vkorc1  
1452771\_s\_at 1.20081 acyl-CoA synthetase long-chain family member 3 Acsl3  
1452772\_at 0.84783 "tankyrase, TRF1-interacting ankyrin-related ADP-ribose polymerase 2" Tnks2  
1452773\_at 0.91045 RIKEN cDNA 5730494N06 gene 5730494N06Rik  
1452774\_at 0.99727 heterogeneous nuclear ribonucleoprotein A3 Hnrpa3  
1452775\_at 1.05403 cysteine and glycine-rich protein 2 binding protein Csrp2bp  
1452776\_a\_at 1.01784 negative regulator of ubiquitin-like proteins 1 Nub1  
1452777\_a\_at 1.01201 negative regulator of ubiquitin-like proteins 1 Nub1  
1452778\_x\_at 1.02278 nucleosome assembly protein 1-like 1 Nap11  
1452779\_at 1.08897 RIKEN cDNA 3110006E14 gene 3110006E14Rik  
1452780\_at 0.99117 "general transcription factor IIIC, polypeptide 2, beta" Gtf3c2  
1452781\_a\_at 1.01333 "general transcription factor IIIC, polypeptide 2, beta" Gtf3c2  
1452782\_a\_at 1.00523 thioredoxin 2 Txn2  
1452783\_at 1.00798 fibronectin type III domain containing 3B Fndc3b  
1452784\_at 1.01063 integrin alpha V Itgav  
1452785\_at 1.02222 RIKEN cDNA 1700034H14 gene 1700034H14Rik  
1452786\_at 0.85609 tRNA 5-methylaminomethyl-2-thiouridylate methyltransferase Trmu

1452787\_at 1.10736 protein arginine N-methyltransferase 1 Prmt1  
 1452788\_at 0.91249 "protein phosphatase 2, regulatory subunit B (B56), epsilon isoform" Ppp2r5e  
 1452789\_at 0.81386 stannin Snn  
 1452790\_x\_at 0.90530 "NADH dehydrogenase (ubiquinone) 1 alpha subcomplex, 3" Ndufa3  
 1452791\_at 0.95389 "coenzyme Q2 homolog, prenyltransferase (yeast)" Coq2  
 1452792\_at 0.97209 DAZ interacting protein 1 Dzip1  
 1452793\_at 1.00689 DAZ interacting protein 1 Dzip1  
 1452794\_x\_at 1.01326 "spermatogenesis associated glutamate (E)-rich protein 1, pseudogene 1 ///  
 similar to Speer1-ps1 protein /// Speer1-like /// similar to spermatogenesis associated glutamate (E)-rich  
 protein 2" Speer1-ps1 /// LOC545728 /// LOC545732 /// LOC667901  
 1452795\_at 1.16087 RIKEN cDNA 1110008B24 gene 1110008B24Rik  
 1452796\_at 0.99214 differentially expressed in FDCP 6 Def6  
 1452797\_at 1.02960 FAST kinase domains 3 Fastkd3  
 1452798\_s\_at 0.94253 mitogen activated protein kinase 1 interacting protein 1 Mapk1ip1  
 1452799\_at 0.95927 RIKEN cDNA 2310009E04 gene 2310009E04Rik  
 1452800\_a\_at 0.93917 RIKEN cDNA 0610008C08 gene /// hypothetical LOC621156 /// hypothetical  
 protein LOC631337 0610008C08Rik /// LOC621156 /// LOC631337  
 1452801\_at 1.01013 "phosphatidylinositol glycan anchor biosynthesis, class K" Pigk  
 1452802\_at 0.92799 RIKEN cDNA 4933411K16 gene 4933411K16Rik  
 1452803\_at 1.00518 GLI pathogenesis-related 2 Glipr2  
 1452804\_at 0.93650 RIKEN cDNA 1700010A17 gene 1700010A17Rik  
 1452805\_at 1.03451 "DNA segment, Chr 11, Wayne State University 47, expressed" D11Wsu47e  
 1452806\_at 0.97191 RIKEN cDNA 1500016O10 gene 1500016O10Rik  
 1452807\_s\_at 1.11464 RIKEN cDNA 1500016O10 gene 1500016O10Rik  
 1452808\_at 1.01472 snurportin 1 Snupn  
 1452809\_at 1.08263 RIKEN cDNA 9030607L17 gene 9030607L17Rik  
 1452810\_at 0.91319 integrator complex subunit 10 /// similar to integrator complex subunit 10  
 Ints10 /// LOC674888  
 1452811\_at 1.01209 5-aminoimidazole-4-carboxamide ribonucleotide formyltransferase/IMP  
 cyclohydrolase Atic  
 1452812\_at 0.76968 latrophilin 1 Lphn1  
 1452813\_a\_at 0.93960 RIKEN cDNA 5033428A16 gene 5033428A16Rik  
 1452814\_at 1.15561 copine III Cpne3  
 1452815\_at 1.07360 "purinergic receptor P2Y, G-protein coupled 10" P2ry10  
 1452816\_at 1.05335 myeloid leukemia factor 1 interacting protein Mlf1ip  
 1452817\_at 0.83807 SET and MYND domain containing 3 Smyd3  
 1452818\_at 0.90665 "transcription termination factor, RNA polymerase II" Ttf2  
 1452819\_at 0.98605 latrophilin 3 Lphn3  
 1452820\_at 0.92693 bromodomain and WD repeat domain containing 2 Brwd2  
 1452821\_at 0.93168 Tial1 cytotoxic granule-associated RNA binding protein-like 1 Tial1  
 1452822\_at 1.02546 integrator complex subunit 7 Ints7  
 1452823\_at 0.92863 glutathione S-transferase kappa 1 Gstk1  
 1452824\_at 1.00163 "DNA segment, Chr 1, Brigham & Women's Genetics 0212 expressed"

## D1Bwg0212e

1452825\_at 0.95883 RIKEN cDNA 5330410G16 gene 5330410G16Rik  
 1452826\_s\_at 1.06563 F-box and leucine-rich repeat protein 20 Fbxl20  
 1452827\_at 0.96635 RIKEN cDNA 1500009C09 gene 1500009C09Rik  
 1452828\_at 0.83949 F-box only protein 21 Fbxo21  
 1452829\_at 1.22652 "carbamoyl-phosphate synthetase 2, aspartate transcarbamylase, and dihydroorotase" Cad  
 1452830\_s\_at 1.09157 "carbamoyl-phosphate synthetase 2, aspartate transcarbamylase, and dihydroorotase" Cad  
 1452831\_s\_at 1.03835 phosphoribosyl pyrophosphate amidotransferase Ppat  
 1452832\_s\_at 0.88476 CDP-diacylglycerol synthase (phosphatidate cytidyltransferase) 2 Cds2  
 1452833\_at 0.99257 Rap guanine nucleotide exchange factor (GEF) 2 Rapgef2  
 1452834\_at 0.88224 RIKEN cDNA 2600010E01 gene 2600010E01Rik  
 1452835\_a\_at 0.97859 polymerase (RNA) mitochondrial (DNA directed) Polrmt  
 1452836\_at 1.15158 lipin 2 Lpin2  
 1452837\_at 1.15780 lipin 2 Lpin2  
 1452838\_at 1.11924 DEAD (Asp-Glu-Ala-Asp) box polypeptide 10 Ddx10  
 1452839\_at 1.12781 DPH5 homolog (*S. cerevisiae*) Dph5  
 1452840\_at 1.01501 RIKEN cDNA 1500009L16 gene 1500009L16Rik  
 1452841\_at 0.96971 phosphoglucomutase 2-like 1 Pgm2l1  
 1452842\_at 1.08868 "heat shock protein, alpha-crystallin-related, B9" Hspb9  
 1452843\_at 0.99504 interleukin 6 signal transducer Il6st  
 1452844\_at 0.99980 "POU domain, class 6, transcription factor 1" Pou6f1  
 1452845\_at 0.97003 "hypoxia-inducible factor 1, alpha subunit inhibitor" Hif1an  
 1452846\_at 1.08369 "protein tyrosine phosphatase, receptor type, f polypeptide (PTPRF), interacting protein (liprin), alpha 4" Ppfia4  
 1452847\_at 0.92668 RIKEN cDNA 2410008K03 gene 2410008K03Rik  
 1452848\_at 1.00900 G protein-coupled receptor 178 Gpr178  
 1452849\_at 0.82529 "transcriptional regulator, SIN3B (yeast)" Sin3b  
 1452850\_s\_at 1.01746 breast cancer metastasis-suppressor 1-like Brms1l  
 1452851\_at 0.96474 trinucleotide repeat containing 4 Tnrc4  
 1452852\_at 1.11638 TWIST neighbor Twistnb  
 1452853\_at 1.04053 carbohydrate kinase-like Carkl  
 1452854\_at 1.01476 --- ---  
 1452855\_at 0.96141 "lymphocyte antigen 6 complex, locus K" Ly6k  
 1452856\_at 0.85121 HCF-binding transcription factor Zhangfei Zf  
 1452857\_at 0.87024 --- ---  
 1452858\_at 0.99874 "ELAV (embryonic lethal, abnormal vision, *Drosophila*)-like 1 (Hu antigen R)" Elavl1  
 1452859\_at 0.93697 RIKEN cDNA 1200016B10 gene 1200016B10Rik  
 1452860\_at 1.00056 F-box and leucine-rich repeat protein 17 Fbxl17  
 1452861\_at 0.73626 RIKEN cDNA 2010300C02 gene /// similar to Y59A8B.19  
 2010300C02Rik /// LOC639555

1452862\_at 0.85595 ras responsive element binding protein 1 Rreb1  
1452863\_at 1.05333 RIKEN cDNA 1700003F12 gene 1700003F12Rik  
1452864\_at 0.82427 "mediator of RNA polymerase II transcription, subunit 12 homolog (yeast)-like" Med12l  
1452865\_at 1.01100 leucine rich repeat containing 27 Lrrc27  
1452866\_at 1.10632 asparaginyl-tRNA synthetase Nars  
1452867\_at 1.14526 "procollagen, type IV, alpha 3 (Goodpasture antigen) binding protein" Col4a3bp  
1452868\_at 1.02897 ubiquitin specific peptidase 24 Usp24  
1452869\_at 1.15862 PRP38 pre-mRNA processing factor 38 (yeast) domain containing B Prpf38b  
1452870\_at 1.11001 --- ---  
1452871\_at 0.93688 nei endonuclease VIII-like 1 (E. coli) Neil1  
1452872\_at 0.89560 RIKEN cDNA 2900054D09 gene 2900054D09Rik  
1452873\_at 0.96828 RIKEN cDNA 5830415F09 gene 5830415F09Rik  
1452874\_at 0.90039 RIKEN cDNA 2510003E04 gene 2510003E04Rik  
1452875\_at 0.97833 HD domain containing 3 Hddc3  
1452876\_x\_at 0.95374 RIKEN cDNA 2610044O15 gene 2610044O15Rik  
1452877\_at 0.95354 RIKEN cDNA 2700029M09 gene 2700029M09Rik  
1452878\_at 0.91288 "protein kinase C, epsilon" Prkce  
1452879\_at 1.00731 synaptopodin 2 Synpo2  
1452880\_at 1.10504 "zinc finger, HIT type 3" Znhit3  
1452881\_at 0.94353 RIKEN cDNA 4833427B12 gene 4833427B12Rik  
1452882\_at 0.88574 progesterone receptor membrane component 2 Pgrmc2  
1452883\_a\_at 0.98378 RIKEN cDNA 2310002J21 gene 2310002J21Rik  
1452884\_at 1.07929 "splicing factor, arginine/serine-rich 2, interacting protein" Sfrs2ip  
1452885\_at 0.94651 "splicing factor, arginine/serine-rich 2, interacting protein" Sfrs2ip  
1452886\_at 0.87578 "0 day neonate cerebellum cDNA, RIKEN full-length enriched library, clone: C230071G16 product:unclassifiable, full insert sequence" ---  
1452887\_at 1.05559 TNF receptor-associated factor 3 interacting protein 1 Traf3ip1  
1452888\_at 0.90315 RIKEN cDNA 1110034G24 gene 1110034G24Rik  
1452889\_at 0.90371 RIKEN cDNA 2310007H09 gene 2310007H09Rik  
1452890\_at 0.93035 tubulin tyrosine ligase like family 5 Ttl5  
1452891\_at 1.12231 coiled-coil domain containing 51 Ccdc51  
1452892\_at 1.00328 serine/threonine kinase 33 Stk33  
1452893\_s\_at 1.06888 RIKEN cDNA 1110065P19 gene /// RIKEN cDNA 2310040A07 gene 1110065P19Rik /// 2310040A07Rik  
1452894\_at 1.04766 "ELAV (embryonic lethal, abnormal vision, Drosophila)-like 4 (Hu antigen D)" Elavl4  
1452895\_at 1.00257 F-box protein 45 Fbxo45  
1452896\_at 1.07248 gene trap locus 3 Gtl3  
1452897\_at 1.02877 cell division cycle 2-like 5 (cholinesterase-related cell division controller) Cdc215  
1452898\_at 1.05026 --- ---

1452899\_at 0.86111 RNA imprinted and accumulated in nucleus Rian  
 1452900\_at 1.11688 "similar to Proline oxidase, mitochondrial precursor (Proline dehydrogenase)"  
 LOC671160  
 1452901\_at 0.94477 cAMP responsive element binding protein 1 Creb1  
 1452902\_at 0.94860 dehydrogenase/reductase (SDR family) member 13 Dhrs13  
 1452903\_at 0.99436 RIKEN cDNA 6230427J02 gene 6230427J02Rik  
 1452904\_at 0.91455 RIKEN cDNA 1700026L06 gene 1700026L06Rik  
 1452905\_at 0.98030 "GTL2, imprinted maternally expressed untranslated mRNA /// latrophilin 1"  
 Gtl2 /// Lphn1  
 1452906\_at 0.88310 "GTL2, imprinted maternally expressed untranslated mRNA" Gtl2  
 1452907\_at 1.14651 galactosylceramidase Galc  
 1452908\_at 0.90804 DIP2 disco-interacting protein 2 homolog A (Drosophila) Dip2a  
 1452909\_at 0.89690 RIKEN cDNA 2410127E18 gene 2410127E18Rik  
 1452910\_at 1.01914 Bcl6 interacting corepressor Bcor  
 1452911\_at 1.00747 "sprouty protein with EVH-1 domain 1, related sequence" Spred1  
 1452912\_at 0.96174 RIKEN cDNA 2600005O03 gene 2600005O03Rik  
 1452913\_at 0.86523 Purkinje cell protein 4-like 1 Pcp4l1  
 1452914\_at 1.09977 RIKEN cDNA 2410024N18 gene 2410024N18Rik  
 1452915\_at 0.97189 "protein kinase, cAMP dependent regulatory, type II alpha" Prkar2a  
 1452916\_at 1.00584 WW domain binding protein 7 Wbp7  
 1452917\_at 0.94415 replication factor C (activator 1) 5 Rfc5  
 1452918\_at 0.92391 "DNA segment, Chr 19, ERATO Doi 737, expressed" D19Ertd737e  
 1452919\_a\_at 1.24265 RIKEN cDNA 1700012G19 gene 1700012G19Rik  
 1452920\_a\_at 0.93406 peptidylprolyl isomerase (cyclophilin)-like 2 Ppil2  
 1452921\_at 0.79485 RIKEN cDNA B130050I23 gene B130050I23Rik  
 1452922\_at 0.94508 "protein phosphatase 1, regulatory subunit 3D" Ppp1r3d  
 1452923\_at 0.97047 Ndufa12-like Ndufa12l  
 1452924\_at 0.83839 RIKEN cDNA 2310007D09 gene 2310007D09Rik  
 1452925\_a\_at 0.92296 membrane-associated ring finger (C3HC4) 5 5-Mar  
 1452926\_at 0.98556 tetratricopeptide repeat domain 14 Ttc14  
 1452927\_x\_at 1.14837 triosephosphate isomerase 1 Tpi1  
 1452928\_at 0.90306 "ABI gene family, member 3" Abi3  
 1452929\_at 0.88337 restin (Reed-Steinberg cell-expressed intermediate filament-associated protein)  
 Rsn  
 1452930\_at 1.01114 dedicator of cyto-kinesis 3 Dock3  
 1452931\_at 1.10874 RIKEN cDNA 2810408M09 gene 2810408M09Rik  
 1452932\_at 0.94208 zinc finger and BTB domain containing 7a Zbtb7a  
 1452933\_at 1.03072 ankyrin repeat domain 39 Ankrd39  
 1452934\_at 0.94849 transmembrane channel-like gene family 5 Tmc5  
 1452935\_at 0.93782 hypothetical protein LOC546143 LOC546143  
 1452936\_at 0.99704 cartilage acidic protein 1 Crtac1  
 1452937\_s\_at 1.15379 coiled coil domain containing 28B Ccdc28b  
 1452938\_at 1.11860 ankyrin repeat and sterile alpha motif domain containing 1B /// similar to AIDA-

## 1b Anks1b /// LOC544718

|              |         |                                                                              |               |
|--------------|---------|------------------------------------------------------------------------------|---------------|
| 1452939_a_at | 1.03568 | "phosphatidylinositol transfer protein, cytoplasmic 1"                       | Pitpnc1       |
| 1452940_x_at | 0.99130 | "phosphatidylinositol transfer protein, cytoplasmic 1"                       | Pitpnc1       |
| 1452941_at   | 1.02098 | RIKEN cDNA 0610038F07 gene                                                   | 0610038F07Rik |
| 1452942_at   | 0.90867 | transmembrane protein 65                                                     | Tmem65        |
| 1452943_at   | 0.86148 | transmembrane protein 65                                                     | Tmem65        |
| 1452944_at   | 0.89117 | arylformamidase                                                              | Afmid         |
| 1452945_at   | 0.79691 | RIKEN cDNA 2610020C11 gene                                                   | 2610020C11Rik |
| 1452946_a_at | 0.92932 | RIKEN cDNA 3222401M22 gene                                                   | 3222401M22Rik |
| 1452947_at   | 0.80155 | "G protein-coupled receptor, family C, group 5, member C"                    | Gprc5c        |
| 1452948_at   | 0.77889 | "tumor necrosis factor, alpha-induced protein 8-like 2"                      | Tnfaip8l2     |
| 1452949_at   | 1.11604 | polymerase (RNA) III (DNA directed) polypeptide B                            | Polr3b        |
| 1452950_at   | 1.13336 | methyltransferase 5 domain containing 1                                      | Mett5d1       |
| 1452951_at   | 0.92410 | RIKEN cDNA 2410089E03 gene                                                   | 2410089E03Rik |
| 1452952_at   | 1.05371 | RIKEN cDNA 9030418K01 gene                                                   | 9030418K01Rik |
| 1452953_at   | 0.92075 | "family with sequence similarity 18, member B"                               | Fam18b        |
| 1452954_at   | 1.15970 | ubiquitin-conjugating enzyme E2C                                             | Ube2c         |
| 1452955_at   | 1.03723 | "general transcription factor IIH, polypeptide 5"                            | Gtf2h5        |
| 1452956_a_at | 1.15851 | "DNA segment, Chr 12, ERATO Doi 647, expressed"                              | D12Ertd647e   |
| 1452957_at   | 1.04830 | keratin associated protein 3-3                                               | Krtap3-3      |
| 1452958_at   | 1.02615 | aspartate beta-hydroxylase domain containing 2                               | Asphd2        |
| 1452959_a_at | 1.02453 | calpain 10                                                                   | Capn10        |
| 1452960_at   | 0.87587 | SCY1-like 3 ( <i>S. cerevisiae</i> )                                         | Scyl3         |
| 1452961_at   | 1.01341 | RIKEN cDNA 1200009O22 gene                                                   | 1200009O22Rik |
| 1452962_at   | 0.97204 | transmembrane protein 25                                                     | Tmem25        |
| 1452963_at   | 1.09575 | RIKEN cDNA 9530077C05 gene                                                   | 9530077C05Rik |
| 1452964_at   | 0.83710 | "tubulin tyrosine ligase-like family, member 11"                             | Ttll11        |
| 1452965_at   | 0.90329 | "ankyrin repeat domain 13 family, member D"                                  | Ankrd13d      |
| 1452966_at   | 0.91674 | RIKEN cDNA 9130430L19 gene                                                   | 9130430L19Rik |
| 1452967_at   | 1.10435 | RIKEN cDNA 1700006H03 gene                                                   | 1700006H03Rik |
| 1452968_at   | 1.04886 | collagen triple helix repeat containing 1                                    | Cthrc1        |
| 1452969_at   | 0.93980 | "ATPase, Ca <sup>++</sup> transporting, plasma membrane 1"                   | Atp2b1        |
| 1452970_at   | 0.86948 | "zinc finger, MYM-type 2"                                                    | Zmym2         |
| 1452971_at   | 1.01376 | UPF3 regulator of nonsense transcripts homolog A (yeast)                     | Upf3a         |
| 1452972_at   | 1.12610 | tetratricopeptide repeat domain 32                                           | Ttc32         |
| 1452973_at   | 1.01542 | protein phosphatase 1K (PP2C domain containing)                              | Ppm1k         |
| 1452974_at   | 0.93832 | nucleolar protein 8                                                          | Nol8          |
| 1452975_at   | 1.02871 | alanine-glyoxylate aminotransferase 2-like 1                                 | Agxt2l1       |
| 1452976_a_at | 0.99115 | "solute carrier family 9 (sodium/hydrogen exchanger), isoform 3 regulator 2" | Slc9a3r2      |
| 1452977_at   | 0.82209 | zinc fingers and homeoboxes 3                                                | Zhx3          |
| 1452978_at   | 1.07974 | transmembrane protein 138                                                    | Tmem138       |
| 1452979_at   | 0.89712 | RIKEN cDNA 2610110G12 gene                                                   | 2610110G12Rik |

1452980\_at 0.89757 RIKEN cDNA 2810468N07 gene 2810468N07Rik  
1452981\_at 0.95514 contactin 1 Cntn1  
1452982\_at 0.99191 insulin-like growth factor I receptor Igflr  
1452983\_at 1.00704 centrosomal protein 57 Cep57  
1452984\_at 0.89012 RIKEN cDNA 5730405I09 gene 5730405I09Rik  
1452985\_at 0.97277 uveal autoantigen with coiled-coil domains and ankyrin repeats Uaca  
1452986\_at 0.93987 "homogentisate 1, 2-dioxygenase" Hgd  
1452987\_at 1.61776 Josephin domain containing 3 Jsd3  
1452988\_at 0.88013 RIKEN cDNA 2610306M01 gene 2610306M01Rik  
1452989\_at 1.04377 RIKEN cDNA 2900009J20 gene 2900009J20Rik  
1452990\_at 0.94556 metal response element binding transcription factor 1 Mtf1  
1452991\_at 0.79885 RIKEN cDNA 2810013C04 gene 2810013C04Rik  
1452992\_at 0.86909 similar to cell division cycle 26 /// similar to cell division cycle 26 /// similar to  
cell division cycle 26 LOC668450 /// LOC672690 /// LOC675848  
1452993\_at 0.98004 RIKEN cDNA 5430416O09 gene 5430416O09Rik  
1452994\_at 0.98394 "phosphatidylinositol-3-phosphate/phosphatidylinositol 5-kinase, type III"  
Pip5k3  
1452995\_at 0.81628 nudix (nucleoside diphosphate linked moiety X)-type motif 17 Nudt17  
1452996\_a\_at 1.02498 "apoptosis, caspase activation inhibitor" Aven  
1452997\_at 0.94098 RIKEN cDNA 2610005L07 gene 2610005L07Rik  
1452998\_at 1.03475 RIKEN cDNA 2010200O16 gene 2010200O16Rik  
1452999\_at 1.01294 survival motor neuron domain containing 1 Smndc1  
1453000\_at 0.92194 calmodulin regulated spectrin-associated protein 1-like 1 Camsap111  
1453001\_at 1.07520 deleted in lymphocytic leukemia 8 Dleu8  
1453002\_at 0.85371 SRY-box containing gene 11 Sox11  
1453003\_at 0.75352 "sortilin-related receptor, LDLR class A repeats-containing" Sorl1  
1453004\_at 0.93234 RIKEN cDNA 3110004L20 gene 3110004L20Rik  
1453005\_at 1.03901 PRP31 pre-mRNA processing factor 31 homolog (yeast) Prpf31  
1453006\_at 1.15905 RIKEN cDNA 2610306H15 gene 2610306H15Rik  
1453007\_at 1.00779 RIKEN cDNA 3110082I17 gene 3110082I17Rik  
1453008\_at 1.06865 RIKEN cDNA 2300002D11 gene 2300002D11Rik  
1453009\_at 0.98723 carboxypeptidase M Cpm  
1453010\_at 1.08479 IWS1 homolog (S. cerevisiae) Iws1  
1453011\_at 0.77015 "3-hydroxybutyrate dehydrogenase, type 2" Bdh2  
1453012\_at 0.70709 TSC22 domain family 2 Tsc22d2  
1453013\_at 1.09955 zinc finger protein 740 Zfp740  
1453014\_a\_at 0.81690 SEC31-like 1 (S. cerevisiae) Sec3111  
1453015\_at 0.90441 RIKEN cDNA 5830471E12 gene 5830471E12Rik  
1453016\_at 0.92117 RIKEN cDNA 2900042B11 gene 2900042B11Rik  
1453017\_at 1.05677 "DNA segment, Chr 5, ERATO Doi 585, expressed" D5Ertd585e  
1453018\_at 0.98132 nuclear VCP-like Nvl  
1453019\_at 1.07087 nuclear VCP-like Nvl  
1453020\_at 1.11728 RIKEN cDNA 1810048J11 gene 1810048J11Rik



|              |         |                                                                                   |                                 |
|--------------|---------|-----------------------------------------------------------------------------------|---------------------------------|
| 1453021_at   | 1.04681 | syntaxin binding protein 5 (tomosyn)                                              | Stxbp5                          |
| 1453022_at   | 0.82285 | GPI-anchored HDL-binding protein 1                                                | Gpihbp1                         |
| 1453023_at   | 1.05969 | ankyrin repeat and KH domain containing 1                                         | Ankhd1                          |
| 1453024_at   | 0.94023 | WD repeat domain 37                                                               | Wdr37                           |
| 1453025_at   | 1.09469 | RIKEN cDNA 2900006F19 gene                                                        | 2900006F19Rik                   |
| 1453026_at   | 0.91855 | cDNA sequence BC061039                                                            | BC061039                        |
| 1453027_at   | 1.03247 | "discs, large (Drosophila) homolog-associated protein 1"                          | Dlgap1                          |
| 1453028_at   | 1.16764 | RIKEN cDNA 4631424J17 gene                                                        | 4631424J17Rik                   |
| 1453029_s_at | 0.98651 | RIKEN cDNA 1110059H15 gene                                                        | 1110059H15Rik                   |
| 1453030_at   | 0.94887 | male-specific lethal 2-like 1 (Drosophila)                                        | Msl2l1                          |
| 1453031_at   | 1.12709 | RIKEN cDNA 0610009B10 gene                                                        | 0610009B10Rik                   |
| 1453032_at   | 0.97083 | RIKEN cDNA 2610109B12 gene                                                        | 2610109B12Rik                   |
| 1453033_at   | 0.96786 | RIKEN cDNA 2010003O02 gene                                                        | 2010003O02Rik                   |
| 1453034_at   | 0.86591 | zinc finger protein 251                                                           | Zfp251                          |
| 1453035_at   | 0.98178 | limb and neural patterns                                                          | Lnp                             |
| 1453036_at   | 0.89573 | RIKEN cDNA 5430439M09 gene                                                        | 5430439M09Rik                   |
| 1453037_at   | 0.93076 | ---                                                                               | ---                             |
| 1453038_at   | 1.00401 | RIKEN cDNA 4930422G04 gene                                                        | 4930422G04Rik                   |
| 1453039_at   | 0.98532 | zinc finger protein 335                                                           | Zfp335                          |
| 1453040_at   | 0.73191 | RIKEN cDNA 2810402A17 gene                                                        | 2810402A17Rik                   |
| 1453041_at   | 0.97392 | Trp53 inducible protein 5                                                         | Trp53i5                         |
| 1453042_at   | 1.10283 | ankyrin repeat and sterile alpha motif domain containing 4B                       | Anks4b                          |
| 1453043_at   | 1.06440 | RIKEN cDNA 0610012H03 gene                                                        | 0610012H03Rik                   |
| 1453044_at   | 0.99606 | RIKEN cDNA C030014I23 gene                                                        | C030014I23Rik                   |
| 1453045_at   | 1.13539 | RIKEN cDNA 4921537D05 gene                                                        | 4921537D05Rik                   |
| 1453046_at   | 0.92283 | "similar to diacylglycerol kinase, eta isoform 2"                                 | LOC623215                       |
| 1453047_at   | 1.09420 | "benzodiazapine receptor, peripheral-like 1"                                      | Bzrp11                          |
| 1453048_at   | 1.04008 | NHL repeat containing 2                                                           | Nhlrc2                          |
| 1453049_at   | 0.96151 | RIKEN cDNA 6620401M08 gene                                                        | 6620401M08Rik                   |
| 1453050_at   | 0.96432 | GINS complex subunit 3 (Psf3 homolog)                                             | Gins3                           |
| 1453051_at   | 0.80898 | zinc finger with KRAB and SCAN domains 1                                          | Zkscan1                         |
| 1453052_at   | 1.21749 | RIKEN cDNA 3110005G23 gene                                                        | 3110005G23Rik                   |
| 1453053_at   | 0.80670 | RIKEN cDNA 2610036L11 gene                                                        | 2610036L11Rik                   |
| 1453054_at   | 0.89634 | secretory carrier membrane protein 1                                              | Scamp1                          |
| 1453055_at   | 0.50822 | "sema domain, transmembrane domain (TM), and cytoplasmic domain, (semaphorin) 6D" | Sema6d                          |
| 1453056_at   | 1.07432 | "solute carrier family 16 (monocarboxylic acid transporters), member 13"          | Slc16a13                        |
| 1453057_at   | 1.02158 | transmembrane protein 162                                                         | Tmem162                         |
| 1453058_at   | 0.90177 | WD repeat domain 5B                                                               | Wdr5b                           |
| 1453059_at   | 1.02137 | RIKEN cDNA 2310046A06 gene /// RIKEN cDNA 2810047F03 gene                         | 2310046A06Rik /// 2810047F03Rik |
| 1453060_at   | 1.01323 | regulator of G-protein signaling 8                                                | Rgs8                            |

|              |         |                                                                                                                                                                           |                                                                             |
|--------------|---------|---------------------------------------------------------------------------------------------------------------------------------------------------------------------------|-----------------------------------------------------------------------------|
| 1453061_at   | 0.84818 | RIKEN cDNA 2610018O07 gene                                                                                                                                                | 2610018O07Rik                                                               |
| 1453062_at   | 0.80085 | RIKEN cDNA A930026I22 gene                                                                                                                                                | A930026I22Rik                                                               |
| 1453063_at   | 0.95485 | "clathrin, light polypeptide (Lcb)"                                                                                                                                       | Cltb                                                                        |
| 1453064_at   | 0.84901 | RIKEN cDNA 5730466H23 gene                                                                                                                                                | 5730466H23Rik                                                               |
| 1453065_at   | 0.86134 | "aldhehyde dehydrogenase family 5, subfamily A1"                                                                                                                          | Aldh5a1                                                                     |
| 1453066_at   | 1.00060 | RIKEN cDNA 2510022D24 gene                                                                                                                                                | 2510022D24Rik                                                               |
| 1453067_at   | 1.02372 | RIKEN cDNA 2610040C18 gene                                                                                                                                                | 2610040C18Rik                                                               |
| 1453068_at   | 0.97819 | "PR domain containing 2, with ZNF domain"                                                                                                                                 | Prdm2                                                                       |
| 1453069_at   | 1.18288 | "phosphatidylinositol 3-kinase, catalytic, beta polypeptide"                                                                                                              | Pik3cb                                                                      |
| 1453070_at   | 0.95893 | protocadherin 17                                                                                                                                                          | Pcdh17                                                                      |
| 1453071_s_at | 1.12220 | KDEL (Lys-Asp-Glu-Leu) containing 2                                                                                                                                       | Kdelc2                                                                      |
| 1453072_at   | 1.03157 | G protein-coupled receptor 160                                                                                                                                            | Gpr160                                                                      |
| 1453073_at   | 1.03481 | RIKEN cDNA 5830403F22 gene                                                                                                                                                | 5830403F22Rik                                                               |
| 1453074_at   | 0.91868 | dual specificity phosphatase 23                                                                                                                                           | Dusp23                                                                      |
| 1453075_at   | 0.90320 | RIKEN cDNA 1600012P17 gene                                                                                                                                                | 1600012P17Rik                                                               |
| 1453076_at   | 0.91666 | RIKEN cDNA 9130211I03 gene                                                                                                                                                | 9130211I03Rik                                                               |
| 1453077_a_at | 1.06231 | "small nuclear RNA activating complex, polypeptide 3"                                                                                                                     | Snopc3                                                                      |
| 1453078_at   | 0.76278 | RIKEN cDNA 8430408J07 gene                                                                                                                                                | 8430408J07Rik                                                               |
| 1453079_at   | 0.88018 | RIKEN cDNA 5730494M16 gene                                                                                                                                                | 5730494M16Rik                                                               |
| 1453080_at   | 0.71833 | "RIKEN cDNA 9130022K13 gene /// similar to apolipoprotein L, 3 (predicted)"                                                                                               | 9130022K13Rik /// LOC672691                                                 |
| 1453081_at   | 0.82986 | RIKEN cDNA 2410022M11 gene                                                                                                                                                | 2410022M11Rik                                                               |
| 1453082_at   | 1.01636 | RIKEN cDNA 2310022L06 gene                                                                                                                                                | 2310022L06Rik                                                               |
| 1453083_at   | 1.10948 | RIKEN cDNA 6430701C03 gene                                                                                                                                                | 6430701C03Rik                                                               |
| 1453084_s_at | 1.11164 | "collagen, type XXII, alpha 1"                                                                                                                                            | Col22a1                                                                     |
| 1453085_at   | 1.06720 | "serine (or cysteine) peptidase inhibitor, clade A, member 1f"                                                                                                            | Serpina1f                                                                   |
| 1453086_at   | 0.93632 | RIKEN cDNA 6330408A02 gene                                                                                                                                                | 6330408A02Rik                                                               |
| 1453087_at   | 1.03404 | RIKEN cDNA 6330403L08 gene                                                                                                                                                | 6330403L08Rik                                                               |
| 1453088_at   | 0.90718 | RIKEN cDNA 6430628N08 gene                                                                                                                                                | 6430628N08Rik                                                               |
| 1453089_at   | 1.08423 | RIKEN cDNA 3110079O15 gene                                                                                                                                                | 3110079O15Rik                                                               |
| 1453090_x_at | 1.01859 | oocyte specific homeobox 1 /// similar to oocyte specific homeobox 2 Obox1 /// LOC666466                                                                                  |                                                                             |
| 1453091_s_at | 0.95315 | LETM1 domain containing 1                                                                                                                                                 | Letmd1                                                                      |
| 1453092_at   | 0.92134 | RIKEN cDNA 2300002G24 gene                                                                                                                                                | 2300002G24Rik                                                               |
| 1453093_at   | 1.00044 | "RasGEF domain family, member 1C"                                                                                                                                         | Rasgef1c                                                                    |
| 1453094_at   | 0.77453 | checkpoint suppressor 1                                                                                                                                                   | Ches1                                                                       |
| 1453095_at   | 0.88299 | "RAB10, member RAS oncogene family"                                                                                                                                       | Rab10                                                                       |
| 1453096_x_at | 1.08038 | ribosomal protein L27 /// similar to ribosomal protein L27 | Rpl27 /// LOC621100 /// LOC622236 /// LOC669376 /// LOC672370 /// LOC675088 |
| 1453097_a_at | 1.00981 | "upstream binding transcription factor, RNA polymerase I"                                                                                                                 | Ubtf                                                                        |
| 1453098_at   | 0.90961 | "glutamate receptor, ionotropic, AMPA2 (alpha 2)"                                                                                                                         | Gria2                                                                       |

|              |         |                                                                                                |                                   |
|--------------|---------|------------------------------------------------------------------------------------------------|-----------------------------------|
| 1453099_at   | 1.12718 | "casein kinase 2, alpha prime polypeptide"                                                     | Csnk2a2                           |
| 1453100_at   | 1.14204 | "casein kinase 2, alpha prime polypeptide"                                                     | Csnk2a2                           |
| 1453101_at   | 0.98785 | Kelch-like 25 (Drosophila)                                                                     | Klh125                            |
| 1453102_at   | 0.79378 | fibronectin leucine rich transmembrane protein 3                                               | Flrt3                             |
| 1453103_at   | 1.01654 | actin-binding LIM protein 1                                                                    | Ablim1                            |
| 1453104_at   | 0.99876 | mitogen activated protein kinase 1                                                             | Mapk1                             |
| 1453105_at   | 1.13876 | zinc finger protein 263                                                                        | Zfp263                            |
| 1453106_a_at | 1.10629 | RNA (guanine-7-) methyltransferase                                                             | Rnmt                              |
| 1453107_s_at | 1.09777 | forkhead box M1 /// phosphatidylethanolamine binding protein 1 /// RIKEN cDNA 4933413G19 gene  | Foxm1 /// Pebp1 /// 4933413G19Rik |
| 1453108_at   | 0.94321 | arylsulfatase K                                                                                | Arsk                              |
| 1453109_at   | 0.76620 | arylsulfatase K                                                                                | Arsk                              |
| 1453110_at   | 1.07083 | WD repeat domain 51B                                                                           | Wdr51b                            |
| 1453111_a_at | 0.89978 | "DNA segment, Chr 11, ERATO Doi 333, expressed"                                                | D11ErtD333e                       |
| 1453112_a_at | 1.00426 | leucine rich repeat containing 18                                                              | Lrrc18                            |
| 1453113_at   | 0.98563 | "WD repeat, SAM and U-box domain containing 1"                                                 | Wdsub1                            |
| 1453114_at   | 1.14596 | nucleolar protein 9                                                                            | Nol9                              |
| 1453115_at   | 1.00529 | ornithine decarboxylase antizyme 3                                                             | Oaz3                              |
| 1453116_at   | 0.94919 | zinc finger protein 689                                                                        | Zfp689                            |
| 1453117_at   | 0.99060 | surfeit gene 2                                                                                 | Surf2                             |
| 1453118_s_at | 1.02064 | ribosomal protein L22                                                                          | Rpl22                             |
| 1453119_at   | 0.94346 | OTU domain containing 1                                                                        | Otud1                             |
| 1453120_at   | 0.87224 | thioredoxin domain containing 13                                                               | Txndc13                           |
| 1453121_at   | 1.12578 | tektin 4                                                                                       | Tekt4                             |
| 1453122_at   | 1.01626 | RIKEN cDNA 4921533L14 gene                                                                     | 4921533L14Rik                     |
| 1453123_at   | 0.93136 | "splicing factor 3b, subunit 2"                                                                | Sf3b2                             |
| 1453124_at   | 1.25634 | transportin 3                                                                                  | Tnpo3                             |
| 1453125_at   | 0.89038 | SRY-box containing gene 11                                                                     | Sox11                             |
| 1453126_at   | 1.02770 | leucine rich repeat and fibronectin type III domain containing 2                               | Lrfn2                             |
| 1453127_at   | 0.94657 | protein phosphatase 1J                                                                         | Ppm1j                             |
| 1453128_at   | 0.95354 | extra cellular link domain-containing 1                                                        | Xlkd1                             |
| 1453129_a_at | 0.79508 | regulator of G-protein signaling 12                                                            | Rgs12                             |
| 1453130_at   | 1.06542 | E1A binding protein p400                                                                       | Ep400                             |
| 1453131_at   | 0.93721 | CD300 antigen like family member G                                                             | Cd300lg                           |
| 1453132_a_at | 0.99263 | RIKEN cDNA 1810036H07 gene                                                                     | 1810036H07Rik                     |
| 1453133_at   | 1.01430 | "solute carrier family 25 (mitochondrial carrier; adenine nucleotide translocator), member 31" | Slc25a31                          |
| 1453134_at   | 1.02225 | "phosphatidylinositol 3-kinase, catalytic, alpha polypeptide"                                  | Pik3ca                            |
| 1453135_at   | 0.83378 | fibronectin type III domain containing 5                                                       | Fndc5                             |
| 1453136_at   | 0.94116 | F-box protein 30                                                                               | Fbxo30                            |
| 1453137_at   | 0.92127 | F-box protein 30                                                                               | Fbxo30                            |
| 1453138_at   | 0.91313 | RNA pseudouridylate synthase domain containing 2                                               | Rpusd2                            |
| 1453139_at   | 0.72082 | nudix (nucleoside diphosphate linked moiety X)-type motif 12                                   | Nudt12                            |

|              |         |                                                                                          |      |               |
|--------------|---------|------------------------------------------------------------------------------------------|------|---------------|
| 1453140_at   | 1.16481 | RIKEN cDNA 9030612M13                                                                    | gene | 9030612M13Rik |
| 1453141_at   | 0.95387 | RIKEN cDNA 0610009L18                                                                    | gene | 0610009L18Rik |
| 1453142_at   | 0.92335 | RIKEN cDNA 4921507P07                                                                    | gene | 4921507P07Rik |
| 1453143_at   | 1.01623 | RIKEN cDNA 4921509F24                                                                    | gene | 4921509F24Rik |
| 1453144_at   | 1.01602 | RIKEN cDNA 4933439C20                                                                    | gene | 4933439C20Rik |
| 1453145_at   | 1.03136 | RIKEN cDNA 4933439C20                                                                    | gene | 4933439C20Rik |
| 1453146_at   | 1.10575 | GTPase activating protein and VPS9 domains 1                                             |      | Gapvd1        |
| 1453147_at   | 1.01088 | polymerase (RNA) III (DNA directed) polypeptide E                                        |      | Polr3e        |
| 1453148_at   | 1.02848 | "sema domain, immunoglobulin domain (Ig), short basic domain, secreted, (semaphorin) 3D" |      | Sema3d        |
| 1453149_at   | 1.10134 | "solute carrier family 25, member 32"                                                    |      | Slc25a32      |
| 1453150_at   | 1.05114 | RIKEN cDNA 5830406J20                                                                    | gene | 5830406J20Rik |
| 1453151_at   | 0.92163 | "solute carrier family 26, member 3"                                                     |      | Slc26a3       |
| 1453152_at   | 1.00087 | MAM domain containing 2                                                                  |      | Mamdc2        |
| 1453153_at   | 0.91840 | lines homolog 2 (Drosophila)                                                             |      | Lins2         |
| 1453154_at   | 0.97792 | RIKEN cDNA 1700029M20                                                                    | gene | 1700029M20Rik |
| 1453155_at   | 1.03475 | transmembrane protein 50A                                                                |      | Tmem50a       |
| 1453156_s_at | 0.90175 | "zinc binding alcohol dehydrogenase, domain containing 1"                                |      | Zadh1         |
| 1453157_at   | 0.97397 | RIKEN cDNA 1700022A21                                                                    | gene | 1700022A21Rik |
| 1453158_at   | 0.92856 | zinc finger protein 622                                                                  |      | Zfp622        |
| 1453159_at   | 0.98217 | EF-hand domain (C-terminal) containing 1                                                 |      | Efhc1         |
| 1453160_at   | 1.07563 | thyroid hormone receptor associated protein 1                                            |      | Thrap1        |
| 1453161_at   | 1.10978 | thyroid hormone receptor associated protein 1                                            |      | Thrap1        |
| 1453162_at   | 1.16924 | "UTP11-like, U3 small nucleolar ribonucleoprotein, (yeast)"                              |      | Utp11         |
| 1453163_at   | 0.84607 | "protein phosphatase 1, regulatory (inhibitor) subunit 12A"                              |      | Ppp1r12a      |
| 1453164_a_at | 0.80630 | phosphatidylserine synthase 2                                                            |      | Ptdss2        |
| 1453165_at   | 1.00339 | methyltransferase like 4                                                                 |      | Mettl4        |
| 1453166_at   | 0.94339 | RIKEN cDNA D130073L02                                                                    | gene | D130073L02Rik |
| 1453167_at   | 0.81437 | RIKEN cDNA 1700013G24                                                                    | gene | 1700013G24Rik |
| 1453168_at   | 0.79090 | RIKEN cDNA 1700029J07                                                                    | gene | 1700029J07Rik |
| 1453169_a_at | 1.07136 | "general transcription factor II H, polypeptide 1"                                       |      | Gtf2h1        |
| 1453170_at   | 0.80495 | SFT2 domain containing 3                                                                 |      | Sft2d3        |
| 1453171_s_at | 1.14318 | "protein phosphatase 1A, magnesium dependent, alpha isoform"                             |      | Ppm1a         |
| 1453172_at   | 1.08257 | "stress 70 protein chaperone, microsomal-associated, human homolog"                      |      | Stch          |
| 1453173_at   | 0.87912 | RIKEN cDNA 2310005E10                                                                    | gene | 2310005E10Rik |
| 1453174_at   | 0.95357 | RIKEN cDNA 2310076G13                                                                    | gene | 2310076G13Rik |
| 1453175_at   | 1.27151 | zinc finger and BTB domain containing 25                                                 |      | Zbtb25        |
| 1453176_a_at | 1.01316 | RIKEN cDNA 4933404M02                                                                    | gene | 4933404M02Rik |
| 1453177_at   | 0.98914 | RIKEN cDNA 4631426E05                                                                    | gene | 4631426E05Rik |
| 1453178_at   | 1.07912 | IQ motif containing H                                                                    |      | Iqch          |
| 1453179_at   | 1.07717 | "phytoceramidase, alkaline"                                                              |      | Phca          |
| 1453180_at   | 0.93640 | RIKEN cDNA 6530404N21                                                                    | gene | 6530404N21Rik |
| 1453181_x_at | 1.07067 | phospholipid scramblase 1                                                                |      | Plscr1        |

1453182\_at 1.06774 sphingomyelin phosphodiesterase 4 Smpd4  
1453183\_at 0.99825 RIKEN cDNA 1110034A24 gene 1110034A24Rik  
1453184\_at 0.86839 RIKEN cDNA 2310040C09 gene 2310040C09Rik  
1453185\_at 0.99290 RIKEN cDNA 5730406M06 gene 5730406M06Rik  
1453186\_at 1.00628 RIKEN cDNA 5730406M06 gene 5730406M06Rik  
1453187\_at 0.79150 OCIA domain containing 2 Ociad2  
1453188\_at 0.81580 RIKEN cDNA 6230424C14 gene 6230424C14Rik  
1453189\_at 1.52390 ubiquitin-conjugating enzyme E2I Ube2i  
1453190\_at 1.02198 ubiquitin specific peptidase 19 Usp19  
1453191\_at 1.14919 "procollagen, type XXVII, alpha 1" Col27a1  
1453192\_at 0.98249 RIKEN cDNA 3110032G18 gene 3110032G18Rik  
1453193\_s\_at 0.99512 kinesin family member 12 Kif12  
1453194\_at 0.69354 RIKEN cDNA 4930432K21 gene 4930432K21Rik  
1453195\_at 1.00410 serologically defined colon cancer antigen 3 Sdccag3  
1453196\_a\_at 1.36496 2'-5' oligoadenylate synthetase-like 2 Oasl2  
1453197\_at 0.91544 "mediator of RNA polymerase II transcription, subunit 25 homolog (yeast)"  
Med25  
1453198\_at 1.07440 "zinc finger protein 422, related sequence 1" Zfp422-rs1  
1453199\_at 1.10231 acyl-Coenzyme A binding domain containing 6 Acbd6  
1453200\_at 0.91087 retinoic acid induced 1 Rai1  
1453201\_at 0.99565 RIKEN cDNA 4632411J06 gene 4632411J06Rik  
1453202\_at 1.02662 RIKEN cDNA E330016A19 gene E330016A19Rik  
1453203\_at 1.06384 RIKEN cDNA 1700011K15 gene 1700011K15Rik  
1453204\_at 0.95160 RIKEN cDNA 4933431K14 gene 4933431K14Rik  
1453205\_at 0.99721 DPY30 domain containing 1 Dydc1  
1453206\_at 1.02269 "acyl-Coenzyme A dehydrogenase family, member 9" Acad9  
1453207\_at 0.99038 RIKEN cDNA 2900053A13 gene 2900053A13Rik  
1453208\_at 1.00029 RIKEN cDNA 2700089E24 gene 2700089E24Rik  
1453209\_at 1.09272 "BRF1 homolog, subunit of RNA polymerase III transcription initiation factor  
IIIB (S. cerevisiae)" Brf1  
1453210\_at 1.04988 RIKEN cDNA 5730507C01 gene 5730507C01Rik  
1453211\_at 1.09525 coiled-coil domain containing 89 Ccdc89  
1453212\_at 1.07732 zinc finger protein 383 Zfp383  
1453213\_at 0.98587 spermatogenesis associated 9 Spata9  
1453214\_at 1.20248 leucine rich repeat containing 15 Lrrc15  
1453215\_at 0.95755 "ribonuclease, RNase A family, 10 (non-active)" Rnase10  
1453216\_at 1.03522 "glutamic pyruvic transaminase 1, soluble" Gpt1  
1453217\_at 0.92179 "similar to Xlr-related, meiosis regulated /// similar to Xlr-related, meiosis  
regulated /// similar to Xlr-related, meiosis regulated /// similar to Xlr-related, meiosis regulated ///  
similar to Xlr-related, meiosis regulated /// similar to Xlr-related, meiosis regulated /// similar to Xlr-  
related, meiosis regulated /// similar to Xlr-related, meiosis regulated /// similar to Xlr-related, meiosis  
regulated /// similar to Xlr-related, meiosis regulated /// similar to Xlr-related, meiosis regulated"  
LOC625508 /// LOC625802 /// LOC625895 /// LOC666096 /// LOC666120 /// LOC666122 ///

LOC666135 /// LOC666151 /// LOC666161 /// LOC666171 /// LOC666179  
 1453218\_at 0.97264 RIKEN cDNA 1110014K05 gene 1110014K05Rik  
 1453219\_a\_at 0.99598 RIKEN cDNA 2410004F06 gene 2410004F06Rik  
 1453220\_at 0.96225 RIKEN cDNA 4432416J03 gene 4432416J03Rik  
 1453221\_at 1.02072 golgi associated PDZ and coiled-coil motif containing Gopc  
 1453222\_at 0.87809 genetic suppressor element 1 Gse1  
 1453223\_s\_at 0.91985 developmental pluripotency associated 2 Dppa2  
 1453224\_at 0.86083 "zinc finger, AN1-type domain 5" Zfand5  
 1453225\_at 1.03331 RIKEN cDNA A930038C07 gene A930038C07Rik  
 1453226\_at 0.96178 RIKEN cDNA 3000004C01 gene 3000004C01Rik  
 1453227\_at 0.94103 Rho-related BTB domain containing 3 Rhobtb3  
 1453228\_at 1.17826 syntaxin 11 Stx11  
 1453229\_s\_at 0.92509 ubiquinol-cytochrome c reductase hinge protein Uqcrh  
 1453230\_at 1.02829 zinc finger protein 74 Zfp74  
 1453231\_at 1.00891 cyclin-dependent kinase-like 1 (CDC2-related kinase) Cdkl1  
 1453232\_at 1.02853 calreticulin 3 Calr3  
 1453233\_s\_at 1.17742 calreticulin 3 Calr3  
 1453234\_at 0.97370 RIKEN cDNA 1300002K09 gene 1300002K09Rik  
 1453235\_at 0.91296 RIKEN cDNA 1700012F11 gene 1700012F11Rik  
 1453236\_at 0.96695 RIKEN cDNA 1700054F22 gene 1700054F22Rik  
 1453237\_at 0.96486 glutaminyl-tRNA synthetase Qars  
 1453238\_s\_at 1.65718 RIKEN cDNA 3930401B19 gene /// RIKEN cDNA 1200016E24 gene ///  
 RIKEN cDNA A130040M12 gene /// RIKEN cDNA E430024C06 gene 3930401B19Rik ///  
 1200016E24Rik /// A130040M12Rik /// E430024C06Rik  
 1453239\_a\_at 1.00292 ankyrin repeat domain 22 Ankrd22  
 1453240\_a\_at 0.97170 granule cell antiserum positive 14 Gcap14  
 1453241\_a\_at 0.91608 RIKEN cDNA 2810047C21 gene 2810047C21Rik  
 1453242\_x\_at 1.09400 RIKEN cDNA 2810047C21 gene 2810047C21Rik  
 1453243\_at 1.11085 RIKEN cDNA 0610030E20 gene 0610030E20Rik  
 1453244\_at 1.06164 RIKEN cDNA 5830416P10 gene 5830416P10Rik  
 1453245\_at 1.05761 RIKEN cDNA 9130024F11 gene 9130024F11Rik  
 1453246\_at 1.06485 "RAB39B, member RAS oncogene family" Rab39b  
 1453247\_at 1.00330 zinc fingerprotein 618 /// similar to zinc finger protein 618 Zfp618 ///  
 LOC667396  
 1453248\_at 0.95224 RIKEN cDNA 2810039B14 gene 2810039B14Rik  
 1453249\_a\_at 0.90260 testis expressed gene 21 Tex21  
 1453250\_at 1.11187 RIKEN cDNA 4921511C04 gene 4921511C04Rik  
 1453251\_at 1.11982 DEAH (Asp-Glu-Ala-His) box polypeptide 30 Dhx30  
 1453252\_at 1.10050 dihydrouridine synthase 4-like (S. cerevisiae) Dus4l  
 1453253\_a\_at 0.96901 RNA pseudouridylate synthase domain containing 1 Rpusd1  
 1453254\_at 0.90005 RIKEN cDNA 1700034O15 gene 1700034O15Rik  
 1453255\_at 1.09409 "solute carrier family 43, member 1" Slc43a1  
 1453256\_at 1.07511 polymerase (RNA) III (DNA directed) polypeptide C Polr3c

1453257\_at 1.13943 "1-acylglycerol-3-phosphate O-acyltransferase 5 (lysophosphatidic acid acyltransferase, epsilon)" Agpat5

1453258\_at 0.92063 --- ---

1453259\_at 0.97953 RIKEN cDNA 3830422K02 gene 3830422K02Rik

1453260\_a\_at 1.09906 "protein phosphatase 2 (formerly 2A), regulatory subunit B (PR 52), alpha isoform" Ppp2r2a

1453261\_at 0.98751 RIKEN cDNA 2610035D17 gene 2610035D17Rik

1453262\_at 0.98863 RIKEN cDNA 2810032G03 gene 2810032G03Rik

1453263\_at 0.94627 "MAK10 homolog, amino-acid N-acetyltransferase subunit, (*S. cerevisiae*)" Mak10

1453264\_at 0.84540 MARVEL (membrane-associating) domain containing 3 Marveld3

1453265\_at 0.99820 RIKEN cDNA 4930579C15 gene 4930579C15Rik

1453266\_at 0.94684 --- ---

1453267\_at 0.83498 AT motif binding factor 1 Atbf1

1453268\_at 0.97250 RIKEN cDNA 5730409G07 gene 5730409G07Rik

1453269\_at 0.79186 unc-5 homolog B (*C. elegans*) Unc5b

1453270\_a\_at 0.94771 PHD finger protein 14 Phf14

1453271\_at 0.85600 PHD finger protein 14 Phf14

1453272\_at 1.12806 RIKEN cDNA 4930579F01 gene 4930579F01Rik

1453273\_at 0.89624 "potassium channel, subfamily V, member 1" Kcnv1

1453274\_at 0.83469 coiled-coil domain containing 103 Ccdc103

1453275\_at 0.99018 RIKEN cDNA 2310002L13 gene 2310002L13Rik

1453276\_at 0.98963 kinesin family member 13B Kif13b

1453277\_at 0.92139 RIKEN cDNA 3021401N23 gene 3021401N23Rik

1453278\_a\_at 0.99309 restin-like 2 Rsnl2

1453279\_x\_at 1.09503 keratin 76 Krt76

1453280\_at 1.08424 "melanoma antigen, family B, 5 /// similar to Melanoma-associated antigen B3 (MAGE-B3 antigen)" Mageb5 /// LOC629542

1453281\_at 0.98760 phosphatidylinositol 3-kinase catalytic delta polypeptide Pik3cd

1453282\_at 1.11833 coxsackievirus and adenovirus receptor Cxadr

1453283\_at 0.99186 phosphoglucomutase 1 Pgm1

1453284\_at 0.94204 RIKEN cDNA 4930405M20 gene 4930405M20Rik

1453285\_at 0.91061 transmembrane protein 88 Tmem88

1453286\_at 0.93701 plexin A2 Plxna2

1453287\_at 1.05808 RIKEN cDNA 5730557B15 gene 5730557B15Rik

1453288\_at 1.05718 activating transcription factor 6 Atf6

1453289\_at 0.99163 "eukaryotic translation initiation factor 2C, 4" Eif2c4

1453290\_at 0.96871 high mobility group box 2-like 1 Hmgb2l1

1453291\_at 1.11085 high mobility group box 2-like 1 Hmgb2l1

1453292\_at 1.06974 RIKEN cDNA 4921501E09 gene 4921501E09Rik

1453293\_a\_at 0.88047 RIKEN cDNA 2810408A11 gene 2810408A11Rik

1453294\_at 0.92338 RIKEN cDNA 1700012B15 gene 1700012B15Rik

1453295\_at 0.90900 additional sex combs like 2 (*Drosophila*) Asxl2

1453296\_at 1.08078 transmembrane protein 103 Tmem103  
1453297\_at 0.95698 RIKEN cDNA 4933417O08 gene 4933417O08Rik  
1453298\_at 1.56690 "protein tyrosine phosphatase, non-receptor type 21" Ptpn21  
1453299\_a\_at 1.25726 purine-nucleoside phosphorylase /// similar to purine-nucleoside phosphorylase /// similar to purine-nucleoside phosphorylase Pnp /// LOC545044 /// LOC667034  
1453300\_at 0.98909 "solute carrier family 35, member D2 /// similar to UDP-glucuronic acid/UDP-N-acetylgalactosamine transporter" Slc35d2 /// LOC674340  
1453301\_a\_at 0.87744 "alkB, alkylation repair homolog 4 (E. coli)" Alkbh4  
1453302\_at 1.17372 transmembrane protein 81 Tmem81  
1453303\_at 0.75634 RIKEN cDNA 4833417J20 gene 4833417J20Rik  
1453304\_s\_at 1.02439 "lymphocyte antigen 6 complex, locus E" Ly6e  
1453305\_at 0.96112 IQ motif containing D Iqcd  
1453306\_at 0.89677 RIKEN cDNA 6330531I01 gene 6330531I01Rik  
1453307\_a\_at 0.87778 anaphase-promoting complex subunit 5 Anapc5  
1453308\_at 1.02578 RIKEN cDNA 8430429K09 gene 8430429K09Rik  
1453309\_at 1.07205 RIKEN cDNA 9330179D12 gene 9330179D12Rik  
1453310\_at 0.88056 peptidylprolyl isomerase (cyclophilin)-like 6 Ppil6  
1453311\_at 1.91038 RIKEN cDNA 2310008B10 gene 2310008B10Rik  
1453312\_at 0.88714 IQ motif and WD repeats 1 Iqwd1  
1453313\_at 0.99474 sestrin 3 Sesn3  
1453314\_x\_at 0.99138 RIKEN cDNA 2610039C10 gene 2610039C10Rik  
1453315\_at 0.90793 within bgcn homolog (Drosophila) Wibg  
1453316\_at 1.02699 RIKEN cDNA 4933401F05 gene 4933401F05Rik  
1453317\_a\_at 0.81324 "KH domain containing, RNA binding, signal transduction associated 3" Khdrbs3  
1453318\_at 0.88938 transmembrane protein 102 Tmem102  
1453319\_at 0.90462 cell division cycle and apoptosis regulator 1 Ccar1  
1453320\_at 0.99127 RIKEN cDNA 1700027A23 gene 1700027A23Rik  
1453321\_at 0.94758 fibronectin type III domain containing 1 Fndc1  
1453322\_at 1.11657 WD repeat domain 33 Wdr33  
1453323\_at 1.11316 RIKEN cDNA 2900079G21 gene 2900079G21Rik  
1453324\_at 0.85759 RIKEN cDNA 6330509M23 gene 6330509M23Rik  
1453325\_at 1.00165 "SAPS domain family, member 2" Saps2  
1453326\_at 0.96991 RIKEN cDNA 3300001A09 gene /// similar to 3300001A09Rik protein 3300001A09Rik /// LOC244911  
1453327\_at 0.80730 keratin 24 Krt24  
1453328\_at 0.98225 RIKEN cDNA 2700008G24 gene 2700008G24Rik  
1453329\_s\_at 1.06144 T-cell lymphoma breakpoint associated target 1 Tcba1  
1453330\_at 0.97132 RIKEN cDNA 0610010D24 gene 0610010D24Rik  
1453331\_at 1.04717 RIKEN cDNA 1700013H16 gene 1700013H16Rik  
1453332\_at 0.97823 RIKEN cDNA 2410002O22 gene 2410002O22Rik  
1453333\_at 0.97010 RIKEN cDNA 1700012P22 gene 1700012P22Rik  
1453334\_at 0.94953 RIKEN cDNA B230216N24 gene B230216N24Rik



1453335\_a\_at 0.91983 spermatogenesis associated 3 Spata3  
1453336\_at 1.09112 coiled-coil domain containing 98 Ccdc98  
1453337\_at 0.86358 RIKEN cDNA 1700013E18 gene 1700013E18Rik  
1453338\_at 1.00503 signal transducing adaptor molecule (SH3 domain and ITAM motif) 2 Stam2  
1453339\_at 0.82857 RIKEN cDNA 1700008I05 gene 1700008I05Rik  
1453340\_at 0.98062 RIKEN cDNA 1700057D03 gene 1700057D03Rik  
1453341\_a\_at 0.95200 RIKEN cDNA 4930425N13 gene 4930425N13Rik  
1453342\_at 1.03812 cell division cycle 40 homolog (yeast) Cdc40  
1453343\_s\_at 0.88096 vaccinia related kinase 2 Vrk2  
1453344\_at 1.15687 RIKEN cDNA 1810032O08 gene 1810032O08Rik  
1453345\_at 0.98431 NIPA-like domain containing 1 Npal1  
1453346\_at 0.95269 RIKEN cDNA 1700011L22 gene 1700011L22Rik  
1453347\_at 1.24740 RIKEN cDNA 4930589P08 gene 4930589P08Rik  
1453348\_at 1.05974 RIKEN cDNA 1700085D22 gene 1700085D22Rik  
1453349\_at 1.05239 "castor homolog 1, zinc finger (Drosophila)" Casz1  
1453350\_at 1.01656 RIKEN cDNA 2010005J08 gene 2010005J08Rik  
1453351\_at 1.02236 T-box 20 Tbx20  
1453352\_at 1.03557 RIKEN cDNA 9030605H24 gene 9030605H24Rik  
1453353\_at 1.00376 RIKEN cDNA 1700047I16 gene 1700047I16Rik  
1453354\_at 1.02307 NADH dehydrogenase (ubiquinone) Fe-S protein 1 Ndufs1  
1453355\_at 0.91193 WNK lysine deficient protein kinase 2 Wnk2  
1453356\_at 1.43193 RIKEN cDNA 5730453I16 gene 5730453I16Rik  
1453357\_at 0.88352 tudor domain containing 9 Tdrd9  
1453358\_s\_at 1.04483 RIKEN cDNA 5830467E07 gene /// RIKEN cDNA C730024G19 gene  
5830467E07Rik /// C730024G19Rik  
1453359\_at 1.66953 exosome component 1 Exosc1  
1453360\_a\_at 1.00237 testis expressed gene 9 Tex9  
1453361\_at 1.71781 "helicase, lymphoid specific" Hells  
1453362\_x\_at 1.06155 ribosomal protein S24 Rps24  
1453363\_at 1.11430 "calcium channel, voltage-dependent, gamma subunit 2" Cacng2  
1453364\_x\_at 0.97423 RIKEN cDNA 9130019O22 gene 9130019O22Rik  
1453365\_at 0.93318 RAB GTPase activating protein 1-like Rabgap11  
1453366\_at 1.16085 tudor and KH domain containing protein Tdrkh  
1453367\_a\_at 0.87937 abhydrolase domain containing 12 Abhd12  
1453368\_at 1.04838 RIKEN cDNA 2310003H01 gene 2310003H01Rik  
1453369\_a\_at 0.97462 FUN14 domain containing 1 Fundc1  
1453370\_at 1.09446 trophinin associated protein Troap  
1453371\_at 1.12481 RIKEN cDNA 4930535B03 gene 4930535B03Rik  
1453372\_at 0.86246 "DnaJ (Hsp40) homolog, subfamily C, member 1" Dnajc1  
1453373\_at 1.00656 RIKEN cDNA 6330532G10 gene 6330532G10Rik  
1453374\_at 0.70448 "zinc finger, AN1-type domain 5" Zfand5  
1453375\_at 0.89496 RIKEN cDNA 4930422N03 gene 4930422N03Rik  
1453376\_at 0.97500 RIKEN cDNA 4921524J06 gene 4921524J06Rik

|              |                                                                                      |               |
|--------------|--------------------------------------------------------------------------------------|---------------|
| 1453377_at   | 1.04708 SH2 domain containing 4A                                                     | Sh2d4a        |
| 1453378_at   | 0.92644 "zinc finger protein, subfamily 1A, 3 (Aiolos)"                              | Zfpn1a3       |
| 1453379_at   | 0.98651 RIKEN cDNA 4930519P11 gene                                                   | 4930519P11Rik |
| 1453380_a_at | 1.05510 XRCC6 binding protein 1                                                      | Xrcc6bp1      |
| 1453381_at   | 0.86921 RIKEN cDNA C030033M12 gene                                                   | C030033M12Rik |
| 1453382_at   | 0.97763 F-box protein 42                                                             | Fbxo42        |
| 1453383_at   | 0.94867 RIKEN cDNA 1700022F17 gene                                                   | 1700022F17Rik |
| 1453384_at   | 1.10991 RIKEN cDNA 4632404N19 gene                                                   | 4632404N19Rik |
| 1453385_at   | 1.04747 RIKEN cDNA 1110015C02 gene                                                   | 1110015C02Rik |
| 1453386_at   | 0.78153 tumor suppressor candidate 1                                                 | Tusc1         |
| 1453387_at   | 1.05836 RIKEN cDNA 4833432E10 gene                                                   | 4833432E10Rik |
| 1453388_at   | 1.04380 RIKEN cDNA 4933416M07 gene                                                   | 4933416M07Rik |
| 1453389_a_at | 0.93226 SH2B adaptor protein 2                                                       | Sh2b2         |
| 1453390_at   | 1.06234 RIKEN cDNA 4930428F12 gene                                                   | 4930428F12Rik |
| 1453391_at   | 1.01739 "spermatogenesis associated glutamate (E)-rich protein 7, pseudogene 1"      | Speer7-ps1    |
| 1453392_at   | 1.08342 RIKEN cDNA 1810054D07 gene                                                   | 1810054D07Rik |
| 1453393_a_at | 1.00815 carbohydrate (chondroitin 6/keratan) sulfotransferase 4                      | Chst4         |
| 1453394_at   | 0.97786 RIKEN cDNA 2410017I17 gene                                                   | 2410017I17Rik |
| 1453395_at   | 0.92588 RIKEN cDNA 5330403D14 gene                                                   | 5330403D14Rik |
| 1453396_at   | 1.00507 RIKEN cDNA 1700123D08 gene                                                   | 1700123D08Rik |
| 1453397_at   | 1.00863 RIKEN cDNA 9130016M20 gene                                                   | 9130016M20Rik |
| 1453398_at   | 1.11448 RIKEN cDNA A930009A15 gene                                                   | A930009A15Rik |
| 1453399_at   | 1.75167 Cyclin T2                                                                    | Ccnt2         |
| 1453400_at   | 0.91260 RIKEN cDNA 4933428D01 gene                                                   | 4933428D01Rik |
| 1453401_at   | 0.93919 RIKEN cDNA 4930428O21 gene                                                   | 4930428O21Rik |
| 1453402_at   | 1.09048 RIKEN cDNA 6430500C12 gene                                                   | 6430500C12Rik |
| 1453403_at   | 0.90374 RIKEN cDNA 2210019I11 gene                                                   | 2210019I11Rik |
| 1453404_at   | 1.01834 RIKEN cDNA 2900002H16 gene                                                   | 2900002H16Rik |
| 1453405_at   | 0.93766 "phospholipase A2, group IVD"                                                | Pla2g4d       |
| 1453406_a_at | 0.96888 "RAB28, member RAS oncogene family"                                          | Rab28         |
| 1453407_at   | 0.95889 RIKEN cDNA 1700018L24 gene                                                   | 1700018L24Rik |
| 1453408_s_at | 1.00392 RIKEN cDNA 4930519G04 gene                                                   | 4930519G04Rik |
| 1453409_at   | 0.93816 cell growth regulator with ring finger domain 1                              | Cgrrf1        |
| 1453410_at   | 0.89765 angiopoietin-like 4                                                          | Angptl4       |
| 1453411_at   | 0.92107 RIKEN cDNA 2010110K16 gene                                                   | 2010110K16Rik |
| 1453412_a_at | 0.98373 SEC14-like 1 (S. cerevisiae)                                                 | Sec14l1       |
| 1453413_at   | 1.01999 "GNAS (guanine nucleotide binding protein, alpha stimulating) complex locus" | Gnas          |
| 1453414_at   | 0.89886 yippee-like 2 (Drosophila)                                                   | Ypel2         |
| 1453415_at   | 0.89967 zinc finger CCCH type containing 6                                           | Zc3h6         |
| 1453416_at   | 1.10819 growth arrest-specific 2 like 3                                              | Gas2l3        |
| 1453417_at   | 1.16908 RIKEN cDNA 4933407K13 gene                                                   | 4933407K13Rik |

|                                |         |                                          |                                                                                                        |
|--------------------------------|---------|------------------------------------------|--------------------------------------------------------------------------------------------------------|
| 1453418_at                     | 0.96667 | "procollagen, type XXIV, alpha 1"        | Col24a1                                                                                                |
| 1453419_at                     | 0.91947 | RIKEN cDNA 2900078C09 gene               | 2900078C09Rik                                                                                          |
| 1453420_at                     | 1.26780 | RIKEN cDNA 1700013G10 gene               | 1700013G10Rik                                                                                          |
| 1453421_at                     | 0.81581 | serine racemase Srr                      |                                                                                                        |
| 1453422_a_at                   | 1.21083 | RIKEN cDNA 1110020G09 gene               | 1110020G09Rik                                                                                          |
| 1453423_at                     | 0.85698 | RIKEN cDNA 4933409L14 gene               | 4933409L14Rik                                                                                          |
| 1453424_at                     | 1.19703 | FYVE and coiled-coil domain containing 1 | Fyco1                                                                                                  |
| 1453425_at                     | 1.02742 | coiled-coil domain containing 83         | Ccdc83                                                                                                 |
| 1453426_a_at                   | 0.90734 | WD repeat and FYVE domain containing 1   | Wdfy1                                                                                                  |
| 1453427_at                     | 0.99317 | "casein kinase 2, alpha 1 polypeptide"   | Csnk2a1                                                                                                |
| 1453428_at                     | 1.03450 | RIKEN cDNA 2700045P11 gene               | 2700045P11Rik                                                                                          |
| 1453429_at                     | 0.87679 | RIKEN cDNA 9530057J20 gene               | /// hypothetical protein LOC665756 ///                                                                 |
| hypothetical protein LOC665787 |         | 9530057J20Rik                            | /// LOC665756 /// LOC665787                                                                            |
| 1453430_at                     | 0.98160 | RIKEN cDNA 2010315L10 gene               | 2010315L10Rik                                                                                          |
| 1453431_at                     | 0.96863 | RIKEN cDNA 2610206C17 gene               | 2610206C17Rik                                                                                          |
| 1453432_at                     | 1.08885 | RIKEN cDNA 1700007G11 gene               | 1700007G11Rik                                                                                          |
| 1453433_at                     | 1.13539 | RIKEN cDNA 2600001A11 gene               | 2600001A11Rik                                                                                          |
| 1453434_at                     | 1.05342 | RIKEN cDNA 1110019D14 gene               | 1110019D14Rik                                                                                          |
| 1453435_a_at                   | 1.01016 | flavin containing monooxygenase 2        | Fmo2                                                                                                   |
| 1453436_at                     | 1.01811 | RIKEN cDNA 4921516I12 gene               | 4921516I12Rik                                                                                          |
| 1453437_at                     | 0.99853 | RIKEN cDNA 2810407D09 gene               | 2810407D09Rik                                                                                          |
| 1453438_x_at                   | 1.15582 | gasdermin 2                              | Gsdm2                                                                                                  |
| 1453439_at                     | 0.94442 | RIKEN cDNA 5430427O21 gene               | 5430427O21Rik                                                                                          |
| 1453440_at                     | 0.97333 | RIKEN cDNA 4921539E11 gene               | 4921539E11Rik                                                                                          |
| 1453441_at                     | 0.97193 | RIKEN cDNA 4921522P10 gene               | 4921522P10Rik                                                                                          |
| 1453442_at                     | 0.84904 | RIKEN cDNA 2310043M15 gene               | 2310043M15Rik                                                                                          |
| 1453443_at                     | 1.02344 | RIKEN cDNA 1110015O18 gene               | 1110015O18Rik                                                                                          |
| 1453444_at                     | 0.97989 | RIKEN cDNA 5730437C12 gene               | 5730437C12Rik                                                                                          |
| 1453445_at                     | 1.15780 | RIKEN cDNA 9030601B04 gene               | 9030601B04Rik                                                                                          |
| 1453446_at                     | 0.83395 | RIKEN cDNA 6430411K18 gene               | 6430411K18Rik                                                                                          |
| 1453447_at                     | 1.14125 | RIKEN cDNA 1700109H08 gene               | 1700109H08Rik                                                                                          |
| 1453448_at                     | 1.87381 | RIKEN cDNA 2310067E19 gene               | 2310067E19Rik                                                                                          |
| 1453449_at                     | 1.10526 | ---                                      | ---                                                                                                    |
| 1453450_at                     | 0.96554 | RIKEN cDNA C030006K11 gene               | C030006K11Rik                                                                                          |
| 1453451_at                     | 1.36107 | RIKEN cDNA 6820402I19 gene               | 6820402I19Rik                                                                                          |
| 1453452_at                     | 0.90042 | RIKEN cDNA 4930517J16 gene               | 4930517J16Rik                                                                                          |
| 1453453_at                     | 0.86844 | "RIKEN cDNA 1700080O16 gene              | /// similar to melanoma antigen family A, 5 /// similar to melanoma antigen family A, 5" 1700080O16Rik |
|                                |         | /// LOC665895                            | /// LOC671223                                                                                          |
|                                |         | /// LOC676479                            |                                                                                                        |
| 1453454_at                     | 0.98925 | RIKEN cDNA 1700012E03 gene               | 1700012E03Rik                                                                                          |
| 1453455_at                     | 0.83977 | RIKEN cDNA 1810059M14 gene               | 1810059M14Rik                                                                                          |
| 1453456_at                     | 0.97984 | RIKEN cDNA 2900084O13 gene               | 2900084O13Rik                                                                                          |
| 1453457_at                     | 1.39458 | RIKEN cDNA 2900070H08 gene               | 2900070H08Rik                                                                                          |

1453458\_at 1.19879 RIKEN cDNA 9430019C24 gene 9430019C24Rik  
1453459\_at 1.07629 RIKEN cDNA 1700028I16 gene 1700028I16Rik  
1453460\_at 0.90943 RIKEN cDNA 1700012I11 gene 1700012I11Rik  
1453461\_at 1.06063 fractured callus expressed transcript 1 Fxc1  
1453462\_at 1.03682 RIKEN cDNA 1110067M19 gene 1110067M19Rik  
1453463\_at 0.98095 RIKEN cDNA 1700019B03 gene 1700019B03Rik  
1453464\_at 1.01453 RIKEN cDNA D530014G21 gene D530014G21Rik  
1453465\_x\_at 0.91990 "protein phosphatase 1, regulatory (inhibitor) subunit 14c" Ppp1r14c  
1453466\_at 1.01352 ribosomal protein S6 Rps6  
1453467\_s\_at 1.06613 ribosomal protein S15a Rps15a  
1453468\_at 0.97295 RIKEN cDNA 4930430F08 gene 4930430F08Rik  
1453469\_at 1.07915 RIKEN cDNA 1810073G21 gene 1810073G21Rik  
1453470\_a\_at 1.14096 "guanine nucleotide binding protein, alpha 13" Gna13  
1453471\_at 1.10436 RIKEN cDNA 4833421E05 gene 4833421E05Rik  
1453472\_a\_at 1.05074 SLAM family member 7 Slamf7  
1453473\_a\_at 0.97000 dynein light chain Tctex-type 1 /// similar to Cytoplasmic dynein light chain (T-complex testis-specific protein 1) (TCTEX-1) Dynlt1 /// LOC671261  
1453474\_at 0.95162 RIKEN cDNA 1300007F04 gene 1300007F04Rik  
1453475\_at 1.34695 RIKEN cDNA 4930445K14 gene 4930445K14Rik  
1453476\_at 1.01269 RIKEN cDNA 1700060J05 gene 1700060J05Rik  
1453477\_at 0.94573 zinc finger CCCH type containing 6 Zc3h6  
1453478\_at 1.00884 "POU domain, class 3, transcription factor 2" Pou3f2  
1453479\_at 0.91829 RIKEN cDNA 1700086P04 gene 1700086P04Rik  
1453480\_at 1.08486 RIKEN cDNA D630002J15 gene D630002J15Rik  
1453481\_at 0.64460 "zinc finger, DHHC domain containing 2" Zdhhc2  
1453482\_at 1.00632 RIKEN cDNA 2310024N18 gene 2310024N18Rik  
1453483\_at 1.00143 RIKEN cDNA 1700023E05 gene 1700023E05Rik  
1453484\_at 0.87821 RIKEN cDNA 1700081D17 gene 1700081D17Rik  
1453485\_s\_at 1.06222 RIKEN cDNA 1110005A03 gene 1110005A03Rik  
1453486\_a\_at 0.99408 "signal peptide, CUB domain, EGF-like 2" Scube2  
1453487\_at 1.05603 dihydrodiol dehydrogenase (dimeric) Dhdh  
1453488\_at 1.06910 RIKEN cDNA 4930458D05 gene 4930458D05Rik  
1453489\_at 0.69831 RIKEN cDNA 1700020O03 gene 1700020O03Rik  
1453490\_at 0.96076 spindle assembly 6 homolog (C. elegans) Sass6  
1453491\_at 0.91671 RIKEN cDNA 4833409A17 gene 4833409A17Rik  
1453492\_at 0.98945 transmembrane protein 67 Tmem67  
1453493\_at 0.97694 RIKEN cDNA 4921528O07 gene /// similar to RIKEN cDNA 4921528O07 gene /// hypothetical protein LOC640258 4921528O07Rik /// LOC625202 /// LOC640258  
1453494\_at 0.83538 RIKEN cDNA 4921513H07 gene 4921513H07Rik  
1453495\_at 0.97935 kallikrein 12 Klk12  
1453496\_at 0.98197 RIKEN cDNA 9430073N08 gene 9430073N08Rik  
1453497\_a\_at 1.07392 "phosphatidylinositol glycan anchor biosynthesis, class A" Piga  
1453498\_x\_at 1.03013 STEAP family member 3 Steap3

|              |         |                                                                             |         |               |
|--------------|---------|-----------------------------------------------------------------------------|---------|---------------|
| 1453499_at   | 0.94964 | D-aspartate oxidase                                                         | Ddo     |               |
| 1453500_at   | 1.09697 | "cytochrome P450, family 2, subfamily u, polypeptide 1"                     | Cyp2u1  |               |
| 1453501_at   | 1.00282 | homeo box B1                                                                | Hoxb1   |               |
| 1453502_at   | 0.84906 | RIKEN cDNA 2210408I21                                                       | gene    | 2210408I21Rik |
| 1453503_at   | 1.12888 | RIKEN cDNA 9230117E20                                                       | gene    | 9230117E20Rik |
| 1453504_at   | 1.21641 | "TAF15 RNA polymerase II, TATA box binding protein (TBP)-associated factor" | Taf15   |               |
| 1453505_a_at | 0.86184 | eukaryotic translation initiation factor 2 alpha kinase 3                   |         | Eif2ak3       |
| 1453506_at   | 1.07814 | RIKEN cDNA 4930500O09                                                       | gene    | 4930500O09Rik |
| 1453507_at   | 0.86729 | methyl-CpG binding domain protein 5                                         | Mbd5    |               |
| 1453508_at   | 1.08325 | RIKEN cDNA 1700104B16                                                       | gene    | 1700104B16Rik |
| 1453509_at   | 0.85761 | Ly6/Plaur domain containing 2                                               | Lypd2   |               |
| 1453510_s_at | 0.88962 | RIKEN cDNA 4930589M24                                                       | gene    | 4930589M24Rik |
| 1453511_at   | 0.99329 | RIKEN cDNA 2310007B03                                                       | gene    | 2310007B03Rik |
| 1453512_at   | 2.60858 | RIKEN cDNA 5830407P18                                                       | gene    | 5830407P18Rik |
| 1453513_at   | 1.19893 | ---                                                                         | ---     |               |
| 1453514_at   | 1.04242 | glycoprotein m6b                                                            | Gpm6b   |               |
| 1453515_at   | 1.05791 | RIKEN cDNA 4930511A21                                                       | gene    | 4930511A21Rik |
| 1453516_at   | 0.98992 | RIKEN cDNA 4931431F19                                                       | gene    | 4931431F19Rik |
| 1453517_at   | 1.01672 | methionine aminopeptidase-like 1                                            | Metap11 |               |
| 1453518_at   | 0.96166 | PDZ domain containing 11                                                    | Pdzd11  |               |
| 1453519_at   | 1.02371 | RIKEN cDNA 2610037D02                                                       | gene    | 2610037D02Rik |
| 1453520_at   | 1.02170 | tetratricopeptide repeat domain 21B                                         | Ttc21b  |               |
| 1453521_at   | 0.87438 | RIKEN cDNA 4933405L10                                                       | gene    | 4933405L10Rik |
| 1453522_at   | 0.97358 | RIKEN cDNA 6530401N04                                                       | gene    | 6530401N04Rik |
| 1453523_at   | 1.02707 | RIKEN cDNA A030006P16                                                       | gene    | A030006P16Rik |
| 1453524_at   | 1.29062 | RIKEN cDNA 5530401D11                                                       | gene    | 5530401D11Rik |
| 1453525_at   | 1.10461 | RIKEN cDNA 9130413E14                                                       | gene    | 9130413E14Rik |
| 1453526_at   | 0.99674 | RIKEN cDNA 4930503E14                                                       | gene    | 4930503E14Rik |
| 1453527_a_at | 0.90511 | neuralized-like homolog (Drosophila)                                        | Neurl   |               |
| 1453528_at   | 0.93830 | leukotriene A4 hydrolase                                                    | Lta4h   |               |
| 1453529_at   | 0.91620 | RIKEN cDNA 6330418B08                                                       | gene    | 6330418B08Rik |
| 1453530_at   | 0.98573 | ---                                                                         | ---     |               |
| 1453531_at   | 1.06422 | zinc finger protein 248                                                     | Zfp248  |               |
| 1453532_at   | 0.86914 | RIKEN cDNA 4933415A04                                                       | gene    | 4933415A04Rik |
| 1453533_at   | 0.90555 | RIKEN cDNA 4933403O08                                                       | gene    | 4933403O08Rik |
| 1453534_at   | 1.19486 | RIKEN cDNA 2810004I08                                                       | gene    | 2810004I08Rik |
| 1453535_at   | 0.97729 | olfactory receptor 78                                                       | Olf78   |               |
| 1453536_at   | 1.00989 | RIKEN cDNA 1700034K16                                                       | gene    | 1700034K16Rik |
| 1453537_a_at | 1.02356 | WD repeat domain 17                                                         | Wdr17   |               |
| 1453538_at   | 1.03695 | RIKEN cDNA A330102K23                                                       | gene    | A330102K23Rik |
| 1453539_at   | 0.92143 | "alkB, alkylation repair homolog 8 (E. coli)"                               | Alkbh8  |               |
| 1453540_at   | 1.08288 | RIKEN cDNA 5430404G13                                                       | gene    | 5430404G13Rik |

|              |         |                                                                                                    |                       |
|--------------|---------|----------------------------------------------------------------------------------------------------|-----------------------|
| 1453541_at   | 1.70673 | "phosphofructokinase, liver, B-type"                                                               | Pfkl                  |
| 1453542_at   | 0.99525 | RIKEN cDNA 2610007B07                                                                              | gene 2610007B07Rik    |
| 1453543_at   | 1.05404 | RIKEN cDNA 4930556H04                                                                              | gene 4930556H04Rik    |
| 1453544_at   | 0.99170 | DMRT-like family C1c /// similar to doublesex and mab-3 related transcription factor 8.1 isoform a | Dmr1c1c /// LOC668357 |
| 1453545_at   | 1.02351 | RIKEN cDNA 5730492I20                                                                              | gene 5730492I20Rik    |
| 1453546_at   | 0.87693 | RIKEN cDNA 1700029I08                                                                              | gene 1700029I08Rik    |
| 1453547_at   | 1.08767 | RIKEN cDNA 1810046K07                                                                              | gene 1810046K07Rik    |
| 1453548_at   | 0.95705 | ---                                                                                                | ---                   |
| 1453549_at   | 1.09706 | RIKEN cDNA 4930500G05                                                                              | gene 4930500G05Rik    |
| 1453550_a_at | 0.93959 | male sterility domain containing 2                                                                 | Mlstd2                |
| 1453551_at   | 0.95299 | "polymerase (DNA directed), theta"                                                                 | Polq                  |
| 1453552_at   | 1.07887 | RIKEN cDNA 2310014F07                                                                              | gene 2310014F07Rik    |
| 1453553_at   | 1.01593 | ---                                                                                                | ---                   |
| 1453554_a_at | 0.98228 | WD repeat domain 33                                                                                | Wdr33                 |
| 1453555_at   | 0.98838 | RIKEN cDNA 3830408D07                                                                              | gene 3830408D07Rik    |
| 1453556_x_at | 0.93217 | CD99 antigen                                                                                       | Cd99                  |
| 1453557_at   | 0.90596 | RIKEN cDNA 4930562F07                                                                              | gene 4930562F07Rik    |
| 1453558_at   | 0.87416 | RIKEN cDNA 4930504H06                                                                              | gene 4930504H06Rik    |
| 1453559_a_at | 0.90939 | Sell (suppressor of lin-12) 1 homolog (C. elegans)                                                 | Sellh                 |
| 1453560_at   | 0.98315 | feminization 1 homolog a (C. elegans)                                                              | Fem1a                 |
| 1453561_x_at | 1.00955 | RIKEN cDNA 8430431K14                                                                              | gene 8430431K14Rik    |
| 1453562_a_at | 0.91285 | NmrA-like family domain containing 1                                                               | Nmr1l                 |
| 1453563_at   | 1.13154 | NmrA-like family domain containing 1                                                               | Nmr1l                 |
| 1453564_a_at | 1.07836 | vacuolar protein sorting 24 (yeast)                                                                | Vps24                 |
| 1453565_at   | 1.04429 | "NADH dehydrogenase (ubiquinone) 1, alpha/beta subcomplex, 1"                                      | Ndufab1               |
| 1453566_at   | 0.99616 | RIKEN cDNA 3200001K10                                                                              | gene 3200001K10Rik    |
| 1453567_s_at | 0.99863 | RIKEN cDNA 2810441K11                                                                              | gene 2810441K11Rik    |
| 1453568_at   | 0.94033 | RIKEN cDNA 2310032F03                                                                              | gene 2310032F03Rik    |
| 1453569_s_at | 0.83646 | MAP/microtubule affinity-regulating kinase 3                                                       | Mark3                 |
| 1453570_x_at | 1.02789 | blocked early in transport 1 homolog (S. cerevisiae)-like                                          | Bet1l                 |
| 1453571_at   | 0.83806 | DEP domain containing 6                                                                            | Depdc6                |
| 1453572_a_at | 0.97386 | proteolipid protein 2                                                                              | Plp2                  |
| 1453573_at   | 1.56369 | "histone1, H3d"                                                                                    | Hist1h3d              |
| 1453574_at   | 1.01410 | "hemoglobin alpha, adult chain 1"                                                                  | Hba-a1                |
| 1453575_at   | 0.98240 | RIKEN cDNA 1200003I10                                                                              | gene 1200003I10Rik    |
| 1453576_at   | 1.07848 | Nipped-B homolog (Drosophila)                                                                      | Nipbl                 |
| 1453577_at   | 1.18501 | RIKEN cDNA 2610018I03                                                                              | gene 2610018I03Rik    |
| 1453578_at   | 0.92756 | phosphotriesterase related                                                                         | Pter                  |
| 1453579_at   | 1.01663 | PHD finger protein 12                                                                              | Phf12                 |
| 1453580_at   | 1.04506 | RIKEN cDNA 5630401D24                                                                              | gene 5630401D24Rik    |
| 1453581_at   | 0.96615 | centrosomal protein 170                                                                            | Cep170                |
| 1453582_at   | 1.79652 | choline kinase alpha                                                                               | Chka                  |

|              |         |                                                                                                                |                     |        |
|--------------|---------|----------------------------------------------------------------------------------------------------------------|---------------------|--------|
| 1453583_at   | 1.25370 | "zinc finger, ZZ-type with EF hand domain 1"                                                                   | Zzef1               |        |
| 1453584_at   | 0.99026 | "serine/threonine kinase 36 (fused homolog, Drosophila)"                                                       |                     | Stk36  |
| 1453585_at   | 0.94131 | RIKEN cDNA 1600010M07 gene                                                                                     | 1600010M07Rik       |        |
| 1453586_at   | 0.98438 | ectonucleoside triphosphate diphosphohydrolase 1                                                               |                     | Entpd1 |
| 1453587_at   | 0.97886 | gamma-glutamyltransferase 6                                                                                    | Ggt6                |        |
| 1453588_at   | 1.07763 | carbonic anhydrase 3                                                                                           | Car3                |        |
| 1453589_a_at | 0.97020 | RIKEN cDNA 2610005L07 gene                                                                                     | 2610005L07Rik       |        |
| 1453590_at   | 0.99704 | ADP-ribosylation factor-like 5B                                                                                | Arl5b               |        |
| 1453591_at   | 0.89007 | RIKEN cDNA 5730437N04 gene                                                                                     | 5730437N04Rik       |        |
| 1453592_at   | 1.00463 | leucine rich repeat containing 39                                                                              | Lrrc39              |        |
| 1453593_at   | 0.74324 | RIKEN cDNA 1700110N18 gene                                                                                     | 1700110N18Rik       |        |
| 1453594_at   | 0.91711 | RIKEN cDNA 4930451G09 gene                                                                                     | 4930451G09Rik       |        |
| 1453595_at   | 0.98854 | RIKEN cDNA 2900064B18 gene                                                                                     | 2900064B18Rik       |        |
| 1453596_at   | 1.16852 | inhibitor of DNA binding 2                                                                                     | Id2                 |        |
| 1453597_at   | 0.95762 | RIKEN cDNA 4933425O20 gene                                                                                     | 4933425O20Rik       |        |
| 1453598_at   | 1.05107 | RIKEN cDNA 3110082D06 gene                                                                                     | 3110082D06Rik       |        |
| 1453599_at   | 1.11972 | tripartite motif-containing 71                                                                                 | Trim71              |        |
| 1453600_at   | 0.94523 | coiled-coil domain containing 18                                                                               | Ccdc18              |        |
| 1453601_at   | 1.09315 | zinc finger protein 710                                                                                        | Zfp710              |        |
| 1453602_at   | 0.91492 | RIKEN cDNA 2810002I04 gene                                                                                     | 2810002I04Rik       |        |
| 1453603_at   | 0.97820 | RIKEN cDNA 2700022O18 gene                                                                                     | 2700022O18Rik       |        |
| 1453604_a_at | 0.97586 | Hbs1-like (S. cerevisiae)                                                                                      | Hbs1l               |        |
| 1453605_s_at | 0.90443 | coiled-coil domain containing 91                                                                               | Ccdc91              |        |
| 1453606_at   | 1.03289 | RIKEN cDNA 4931403G20 gene                                                                                     | 4931403G20Rik       |        |
| 1453607_at   | 1.00334 | microfibrillar-associated protein 3-like                                                                       | Mfap3l              |        |
| 1453608_at   | 1.48874 | RIKEN cDNA 2310020J12 gene                                                                                     | 2310020J12Rik       |        |
| 1453609_s_at | 1.07550 | coiled-coil domain containing 9                                                                                | Ccdc9               |        |
| 1453610_at   | 0.90729 | RIKEN cDNA 4931406B18 gene                                                                                     | 4931406B18Rik       |        |
| 1453611_at   | 1.05937 | retinoblastoma binding protein 6                                                                               | Rbbp6               |        |
| 1453612_at   | 0.85454 | NIMA (never in mitosis gene a)-related expressed kinase 1                                                      |                     | Nek1   |
| 1453613_at   | 0.91363 | RIKEN cDNA A130006I12 gene                                                                                     | A130006I12Rik       |        |
| 1453614_a_at | 0.88113 | "nuclear factor, erythroid derived 2, like 3"                                                                  | Nfe2l3              |        |
| 1453615_at   | 0.97913 | ---                                                                                                            | ---                 |        |
| 1453616_at   | 0.92522 | RIKEN cDNA 3830408C21 gene                                                                                     | 3830408C21Rik       |        |
| 1453617_at   | 0.91108 | "zinc finger, RAN-binding domain containing 3"                                                                 | Zranb3              |        |
| 1453618_at   | 0.84618 | RIKEN cDNA 4933424N20 gene                                                                                     | 4933424N20Rik       |        |
| 1453619_at   | 0.88645 | EF hand calcium binding domain 1                                                                               | Efcab1              |        |
| 1453620_at   | 0.80131 | RIKEN cDNA 3010022N24 gene                                                                                     | 3010022N24Rik       |        |
| 1453621_at   | 1.07892 | THO complex 7 homolog (Drosophila) /// similar to Ngg1 interacting factor 3 like 1 binding protein 1 isoform 1 | Thoc7 /// LOC670839 |        |
| 1453622_s_at | 0.84531 | myeloid/lymphoid or mixed lineage-leukemia translocation to 3 homolog (Drosophila)                             | Mllt3               |        |
| 1453623_a_at | 1.08993 | RAD23a homolog (S. cerevisiae)                                                                                 | Rad23a              |        |

|              |         |                                                                                     |               |
|--------------|---------|-------------------------------------------------------------------------------------|---------------|
| 1453624_at   | 1.18373 | RIKEN cDNA C430046K18 gene                                                          | C430046K18Rik |
| 1453625_at   | 1.01791 | RIKEN cDNA 2210407P21 gene                                                          | 2210407P21Rik |
| 1453626_at   | 1.10904 | RIKEN cDNA 3930402G23 gene                                                          | 3930402G23Rik |
| 1453627_at   | 1.20821 | RIKEN cDNA 2610020P09 gene                                                          | 2610020P09Rik |
| 1453628_s_at | 0.86883 | leucine rich repeat containing 2                                                    | Lrrc2         |
| 1453629_at   | 0.99495 | RIKEN cDNA 4930478L05 gene                                                          | 4930478L05Rik |
| 1453630_at   | 0.94574 | UDP-N-acetyl-alpha-D-galactosamine:polypeptide N-acetylgalactosaminyltransferase 14 | Galnt14       |
| 1453631_at   | 0.95671 | syntaxin 8                                                                          | Stx8          |
| 1453632_at   | 0.93856 | RIKEN cDNA 4930538K18 gene                                                          | 4930538K18Rik |
| 1453633_a_at | 1.02415 | ring finger protein 41                                                              | Rnf41         |
| 1453634_a_at | 1.02234 | endoplasmic reticulum protein 29                                                    | Erp29         |
| 1453635_at   | 1.03864 | RIKEN cDNA 4932416N17 gene                                                          | 4932416N17Rik |
| 1453636_at   | 1.40928 | polycomb group ring finger 5                                                        | Pcgf5         |
| 1453637_at   | 1.03752 | RIKEN cDNA 5430410E06 gene                                                          | 5430410E06Rik |
| 1453638_at   | 0.92262 | RIKEN cDNA 9030420J04 gene                                                          | 9030420J04Rik |
| 1453639_s_at | 0.75156 | RIKEN cDNA 0610037D15 gene                                                          | 0610037D15Rik |
| 1453640_at   | 0.98915 | RIKEN cDNA 2210019G11 gene                                                          | 2210019G11Rik |
| 1453641_at   | 1.15372 | breast carcinoma amplified sequence 1                                               | Bcas1         |
| 1453642_at   | 0.97959 | RIKEN cDNA 6530411M01 gene                                                          | 6530411M01Rik |
| 1453643_at   | 1.17343 | RIKEN cDNA 1700001L19 gene                                                          | 1700001L19Rik |
| 1453644_at   | 0.84109 | odorant binding protein 1a                                                          | Obp1a         |
| 1453645_at   | 0.85711 | RIKEN cDNA 2700046A07 gene                                                          | 2700046A07Rik |
| 1453646_at   | 1.37022 | RIKEN cDNA 3110005L21 gene                                                          | 3110005L21Rik |
| 1453647_at   | 0.95618 | RIKEN cDNA 9530059J11 gene                                                          | 9530059J11Rik |
| 1453648_at   | 0.98483 | sushi domain containing 3                                                           | Susd3         |
| 1453649_at   | 0.90969 | RIKEN cDNA C030039L03 gene                                                          | C030039L03Rik |
| 1453650_at   | 0.96087 | RIKEN cDNA 4930413F20 gene                                                          | 4930413F20Rik |
| 1453651_a_at | 1.06923 | brain protein 44-like                                                               | Brp44l        |
| 1453652_at   | 0.89415 | RIKEN cDNA 4933400F21 gene                                                          | 4933400F21Rik |
| 1453653_at   | 1.02239 | RIKEN cDNA 6330576A10 gene                                                          | 6330576A10Rik |
| 1453654_at   | 0.87816 | "CCR4-NOT transcription complex, subunit 10"                                        | Cnot10        |
| 1453655_at   | 0.95088 | RIKEN cDNA 2900005J15 gene                                                          | 2900005J15Rik |
| 1453656_a_at | 0.98090 | RIKEN cDNA 4933431G14 gene                                                          | 4933431G14Rik |
| 1453657_at   | 0.88944 | RIKEN cDNA 2310065F04 gene                                                          | 2310065F04Rik |
| 1453658_at   | 0.94664 | RIKEN cDNA 5830477G23 gene                                                          | 5830477G23Rik |
| 1453659_at   | 1.03042 | centromere protein O                                                                | Cenpo         |
| 1453660_at   | 1.10983 | RIKEN cDNA 5430420F09 gene                                                          | 5430420F09Rik |
| 1453661_at   | 0.87505 | RIKEN cDNA 9130403I23 gene                                                          | 9130403I23Rik |
| 1453662_at   | 1.05811 | hypothetical LOC77413                                                               | LOC77413      |
| 1453663_at   | 0.99304 | RIKEN cDNA 4932442E05 gene                                                          | 4932442E05Rik |
| 1453664_at   | 0.73886 | RIKEN cDNA 9130017K11 gene                                                          | 9130017K11Rik |
| 1453665_at   | 1.10324 | RIKEN cDNA 4930529M08 gene                                                          | 4930529M08Rik |



|              |                                                                                  |                                         |                             |
|--------------|----------------------------------------------------------------------------------|-----------------------------------------|-----------------------------|
| 1453666_at   | 0.98159 ring finger protein 32                                                   | Rnf32                                   |                             |
| 1453667_at   | 1.02238 RIKEN cDNA 1700065D16                                                    | gene                                    | 1700065D16Rik               |
| 1453668_at   | 0.74776 RIKEN cDNA 3110052M02                                                    | gene                                    | 3110052M02Rik               |
| 1453669_at   | 0.97616 RIKEN cDNA 4930578C19                                                    | gene                                    | 4930578C19Rik               |
| 1453670_at   | 1.01511 ubiquitin specific peptidase 50                                          | Usp50                                   |                             |
| 1453671_at   | 0.95552 RIKEN cDNA 9430041J12                                                    | gene                                    | 9430041J12Rik               |
| 1453672_at   | 0.95940 RIKEN cDNA 2810038L03                                                    | gene                                    | 2810038L03Rik               |
| 1453673_at   | 0.95389 ATPase type 13A4                                                         | Atp13a4                                 |                             |
| 1453674_at   | 1.19439 "glucosaminyl (N-acetyl) transferase 2, I-branching enzyme"              | Gcnt2                                   |                             |
| 1453675_at   | 0.88327 "solute carrier family 16 (monocarboxylic acid transporters), member 10" | Slc16a10                                |                             |
| 1453676_at   | 0.90103 RIKEN cDNA A930041D05                                                    | gene                                    | A930041D05Rik               |
| 1453677_a_at | 0.96273 "Der1-like domain family, member 3"                                      | Derl3                                   |                             |
| 1453678_at   | 0.88780 methyl-CpG binding domain protein 1                                      | Mbd1                                    |                             |
| 1453679_at   | 0.99580 RIKEN cDNA 1700100I10                                                    | gene                                    | 1700100I10Rik               |
| 1453680_at   | 1.10158 RIKEN cDNA 8030456M14                                                    | gene                                    | 8030456M14Rik               |
| 1453681_at   | 1.35766 ATPase inhibitory factor 1                                               | Atpif1                                  |                             |
| 1453682_at   | 0.87288 "GA repeat binding protein, beta 2"                                      | Gabpb2                                  |                             |
| 1453683_a_at | 1.01403 centrosomal protein 55                                                   | Cep55                                   |                             |
| 1453684_s_at | 1.02805 RIKEN cDNA 2610312B22                                                    | gene                                    | 2610312B22Rik               |
| 1453685_at   | 0.89777 nudix (nucleoside diphosphate linked moiety X)-type motif 7              | Nudt7                                   |                             |
| 1453686_x_at | 1.03009 nephronophthisis 1 (juvenile) homolog (human)                            | Nphp1                                   |                             |
| 1453687_at   | 0.87099 "solute carrier family 4 (anion exchanger), member 3"                    | Slc4a3                                  |                             |
| 1453688_at   | 1.18885 "CWF19-like 2, cell cycle control (S. pombe)"                            | Cwf19l2                                 |                             |
| 1453689_at   | 0.93941 "Fanconi anemia, complementation group E"                                | Fance                                   |                             |
| 1453690_at   | 0.93311 "membrane protein, palmitoylated 7 (MAGUK p55 subfamily member 7)"       | Mpp7                                    |                             |
| 1453691_at   | 0.92625 RIKEN cDNA 4921528I07                                                    | gene                                    | 4921528I07Rik               |
| 1453692_at   | 0.89394 RIKEN cDNA 4930581F22                                                    | gene                                    | 4930581F22Rik               |
| 1453693_at   | 0.97993 WD repeat domain 20                                                      | Wdr20                                   |                             |
| 1453694_at   | 1.05996 RIKEN cDNA 4631402N15                                                    | gene                                    | 4631402N15Rik               |
| 1453695_at   | 0.98580 RIKEN cDNA B430211C08                                                    | gene                                    | B430211C08Rik               |
| 1453696_at   | 0.95796 RIKEN cDNA 4921508A21                                                    | gene                                    | 4921508A21Rik               |
| 1453697_at   | 0.94842 RIKEN cDNA 6530402F18                                                    | gene                                    | 6530402F18Rik               |
| 1453698_at   | 1.02080 RIKEN cDNA 6030451C04                                                    | gene                                    | 6030451C04Rik               |
| 1453699_at   | 0.88020 RIKEN cDNA 4930448D08                                                    | gene                                    | 4930448D08Rik               |
| 1453700_s_at | 1.00310 "RIKEN cDNA 4933403O03                                                   | gene /// similar to double homeobox, 4" | 4933403O03Rik /// LOC245263 |
| 1453701_at   | 1.06112 RIKEN cDNA 4921515E04                                                    | gene                                    | 4921515E04Rik               |
| 1453702_at   | 0.93487 coiled-coil domain containing 105                                        | Ccdc105                                 |                             |
| 1453703_at   | 0.99203 "dynein, axonemal, heavy polypeptide 17"                                 | Dnah17                                  |                             |
| 1453704_at   | 1.08962 --- ---                                                                  |                                         |                             |
| 1453705_at   | 0.97095 RIKEN cDNA B230110C06                                                    | gene                                    | B230110C06Rik               |

|              |         |                                                                        |                |
|--------------|---------|------------------------------------------------------------------------|----------------|
| 1453706_at   | 1.32041 | RIKEN cDNA 2900042A17 gene                                             | 2900042A17Rik  |
| 1453707_at   | 0.92422 | RIKEN cDNA 4930480G23 gene                                             | 4930480G23Rik  |
| 1453708_a_at | 1.07985 | glutathione S-transferase omega 2                                      | Gsto2          |
| 1453709_at   | 1.00417 | RIKEN cDNA 3426406O18 gene                                             | 3426406O18Rik  |
| 1453710_at   | 0.88949 | transmembrane protein 116                                              | Tmem116        |
| 1453711_at   | 1.05734 | "R-spondin family, member 4"                                           | Rspo4          |
| 1453712_a_at | 0.93231 | mitogen activated protein kinase kinase 5                              | Map2k5         |
| 1453713_s_at | 1.07807 | RIKEN cDNA 4930546H06 gene                                             | 4930546H06Rik  |
| 1453714_a_at | 0.94531 | shroom family member 3                                                 | Shroom3        |
| 1453715_at   | 0.95109 | synaptic vesicle glycoprotein 2c                                       | Sv2c           |
| 1453716_at   | 0.92917 | RIKEN cDNA 4930480K23 gene                                             | 4930480K23Rik  |
| 1453717_s_at | 1.28161 | "tubulin tyrosine ligase-like family, member 10"                       | Ttl10          |
| 1453718_at   | 0.93050 | BCL2-like 12 (proline rich)                                            | Bcl2l12        |
| 1453719_at   | 0.95945 | RIKEN cDNA 4930506C21 gene                                             | 4930506C21Rik  |
| 1453720_at   | 0.91332 | ring finger protein 157                                                | Rnf157         |
| 1453721_a_at | 1.05934 | "solute carrier family 31, member 2"                                   | Slc31a2        |
| 1453722_s_at | 1.05588 | "splicing factor, arginine/serine-rich 1 (ASF/SF2)"                    | Sfrs1          |
| 1453723_x_at | 0.98462 | "ubiquitin B /// gene model 1821, (NCBI)"                              | Ubb /// Gm1821 |
| 1453724_a_at | 0.87068 | "serine (or cysteine) peptidase inhibitor, clade F, member 1"          | Serpinf1       |
| 1453725_a_at | 1.09629 | mitochondrial ribosomal protein S7                                     | Mrps7          |
| 1453726_s_at | 1.02641 | RIKEN cDNA 2810407C02 gene                                             | 2810407C02Rik  |
| 1453727_at   | 0.98868 | RIKEN cDNA 2610101J03 gene                                             | 2610101J03Rik  |
| 1453728_a_at | 0.99921 | mitochondrial ribosomal protein S17                                    | Mrps17         |
| 1453729_a_at | 1.04501 | ribosomal protein L37                                                  | Rpl37          |
| 1453730_at   | 0.81364 | sterile alpha motif domain containing 8                                | Samd8          |
| 1453731_a_at | 1.02850 | transmembrane protein 77                                               | Tmem77         |
| 1453732_at   | 0.93792 | RIKEN cDNA 6230416A05 gene                                             | 6230416A05Rik  |
| 1453733_a_at | 1.05435 | RIKEN cDNA 4933434E20 gene                                             | 4933434E20Rik  |
| 1453734_at   | 0.89844 | alpha thalassemia/mental retardation syndrome X-linked homolog (human) | Atrx           |
| 1453735_at   | 0.92910 | RIKEN cDNA 5730455P16 gene                                             | 5730455P16Rik  |
| 1453736_s_at | 0.80557 | RIKEN cDNA B230219D22 gene                                             | B230219D22Rik  |
| 1453737_at   | 1.08881 | RIKEN cDNA 5730509C05 gene                                             | 5730509C05Rik  |
| 1453738_at   | 0.89192 | RIKEN cDNA C330018D20 gene                                             | C330018D20Rik  |
| 1453739_at   | 1.01961 | transmembrane protein 126B                                             | Tmem126b       |
| 1453740_a_at | 0.94419 | cyclin L2                                                              | Ccnl2          |
| 1453741_x_at | 1.07044 | angel homolog 2 (Drosophila)                                           | Angel2         |
| 1453742_at   | 1.02933 | vacuolar protein sorting 33A (yeast)                                   | Vps33a         |
| 1453743_x_at | 1.01571 | PHD finger protein 14                                                  | Phf14          |
| 1453744_a_at | 0.91120 | ankyrin repeat domain 40                                               | Ankrd40        |
| 1453745_at   | 1.04963 | RIKEN cDNA 2700038G22 gene                                             | 2700038G22Rik  |
| 1453746_at   | 0.98017 | formin binding protein 1                                               | Fnbp1          |
| 1453747_at   | 0.91084 | RIKEN cDNA 2810021J22 gene                                             | 2810021J22Rik  |
| 1453748_a_at | 1.21543 | kinesin family member 23                                               | Kif23          |

|              |         |                                                                   |               |  |
|--------------|---------|-------------------------------------------------------------------|---------------|--|
| 1453749_at   | 0.84893 | RIKEN cDNA 2610507I01 gene                                        | 2610507I01Rik |  |
| 1453750_x_at | 0.91862 | "phosphatidylinositol transfer protein, cytoplasmic 1"            | Pitpnc1       |  |
| 1453751_at   | 0.94128 | DEAH (Asp-Glu-Ala-His) box polypeptide 38                         | Dhx38         |  |
| 1453752_at   | 1.04910 | ribosomal protein L17                                             | Rpl17         |  |
| 1453753_at   | 2.17948 | denticleless homolog (Drosophila)                                 | Dtl           |  |
| 1453754_at   | 1.04040 | S100P binding protein                                             | S100pbp       |  |
| 1453755_at   | 1.19752 | U7 snRNP-specific Sm-like protein LSM11                           | Lsm11         |  |
| 1453756_at   | 0.86739 | RIKEN cDNA 2900075N08 gene                                        | 2900075N08Rik |  |
| 1453757_at   | 0.96053 | hect domain and RLD 5                                             | Herc5         |  |
| 1453758_at   | 1.10860 | RIKEN cDNA 2810027O19 gene                                        | 2810027O19Rik |  |
| 1453759_at   | 0.95407 | NOL1/NOP2/Sun domain family 2                                     | Nsun2         |  |
| 1453760_at   | 1.12304 | mesoderm induction early response 1 homolog (Xenopus laevis)      | Mier1         |  |
| 1453761_at   | 1.08268 | PHD finger protein 6                                              | Phf6          |  |
| 1453762_at   | 0.97557 | vacuolar protein sorting 26 homolog B (yeast)                     | Vps26b        |  |
| 1453763_at   | 0.91804 | thioredoxin domain containing 11                                  | Txndc11       |  |
| 1453764_at   | 0.96961 | RIKEN cDNA 3110021N24 gene                                        | 3110021N24Rik |  |
| 1453765_at   | 1.01609 | RIKEN cDNA A330106J01 gene                                        | A330106J01Rik |  |
| 1453766_a_at | 1.08829 | RIKEN cDNA 4931407K02 gene                                        | 4931407K02Rik |  |
| 1453767_a_at | 0.99565 | "5',3'-nucleotidase, mitochondrial"                               | Nt5m          |  |
| 1453768_a_at | 1.18968 | RIKEN cDNA 5430432M24 gene                                        | 5430432M24Rik |  |
| 1453769_at   | 0.98091 | cytoskeleton associated protein 2-like                            | Ckap2l        |  |
| 1453770_at   | 1.01294 | carboxypeptidase A4                                               | Cpa4          |  |
| 1453771_at   | 1.00506 | "GULP, engulfment adaptor PTB domain containing 1"                | Gulp1         |  |
| 1453772_at   | 0.95953 | synaptogyrin 1                                                    | Syngr1        |  |
| 1453773_at   | 0.97469 | RIKEN cDNA 4931406I20 gene                                        | 4931406I20Rik |  |
| 1453774_at   | 0.98546 | RIKEN cDNA 2810002O09 gene                                        | 2810002O09Rik |  |
| 1453775_at   | 1.14328 | RIKEN cDNA 4921505C17 gene                                        | 4921505C17Rik |  |
| 1453776_at   | 1.45656 | RIKEN cDNA 5730407K14 gene                                        | 5730407K14Rik |  |
| 1453777_a_at | 1.09671 | N-deacetylase/N-sulfotransferase (heparan glucosaminyl) 3         | Ndst3         |  |
| 1453778_at   | 0.92704 | RIKEN cDNA 2810407C02 gene                                        | 2810407C02Rik |  |
| 1453779_at   | 1.14756 | RIKEN cDNA 1700020L24 gene                                        | 1700020L24Rik |  |
| 1453780_at   | 1.00319 | ---                                                               | ---           |  |
| 1453781_at   | 0.84022 | ---                                                               | ---           |  |
| 1453782_at   | 1.14033 | RIKEN cDNA 3021401C12 gene                                        | 3021401C12Rik |  |
| 1453783_at   | 0.96246 | purine rich element binding protein A                             | Pura          |  |
| 1453784_at   | 1.03995 | integrin-linked kinase-associated serine/threonine phosphatase 2C | Ilkap         |  |
| 1453785_at   | 1.01941 | tafazzin                                                          | Taz           |  |
| 1453786_at   | 0.95296 | ---                                                               | ---           |  |
| 1453787_at   | 0.85074 | thioredoxin domain containing 13                                  | Txndc13       |  |
| 1453788_at   | 0.99118 | ---                                                               | ---           |  |
| 1453789_at   | 1.02627 | RIKEN cDNA 4933440N22 gene                                        | 4933440N22Rik |  |
| 1453790_at   | 1.02871 | RIKEN cDNA 5730403B10 gene                                        | 5730403B10Rik |  |
| 1453791_at   | 1.09604 | RIKEN cDNA 2810449C10 gene                                        | 2810449C10Rik |  |

|              |         |                                                                                                                                                   |               |
|--------------|---------|---------------------------------------------------------------------------------------------------------------------------------------------------|---------------|
| 1453792_at   | 1.03035 | RIKEN cDNA A930003G23 gene                                                                                                                        | A930003G23Rik |
| 1453793_at   | 0.90041 | RIKEN cDNA 1700026J12 gene                                                                                                                        | 1700026J12Rik |
| 1453794_at   | 1.06244 | fer-1-like 4 (C. elegans) Fer114                                                                                                                  |               |
| 1453795_at   | 0.95390 | fumarylacetoacetate hydrolase domain containing 2A                                                                                                | Fahd2a        |
| 1453796_a_at | 1.00399 | ERGIC and golgi 2 Ergic2                                                                                                                          |               |
| 1453797_at   | 0.89702 | "phosphatase, orphan 2" Phospho2                                                                                                                  |               |
| 1453798_at   | 0.83437 | coiled-coil domain containing 93                                                                                                                  | Ccdc93        |
| 1453799_at   | 1.00854 | RIKEN cDNA 9430038I01 gene                                                                                                                        | 9430038I01Rik |
| 1453800_at   | 1.06746 | RIKEN cDNA 2500002L14 gene                                                                                                                        | 2500002L14Rik |
| 1453801_at   | 0.95179 | thioesterase superfamily member 5                                                                                                                 | Them5         |
| 1453802_at   | 0.88646 | RIKEN cDNA 3732412D22 gene                                                                                                                        | 3732412D22Rik |
| 1453803_at   | 0.93558 | cytotoxic granule-associated RNA binding protein 1                                                                                                | Tia1          |
| 1453804_a_at | 1.03008 | "origin recognition complex, subunit 4-like (S. cerevisiae)"                                                                                      | Orc4l         |
| 1453805_at   | 0.97687 | "Fucosidase, alpha-L- 1, tissue"                                                                                                                  | Fuca1         |
| 1453806_at   | 0.94238 | "NADH dehydrogenase (ubiquinone) 1 beta subcomplex, 2"                                                                                            | Ndufb2        |
| 1453807_at   | 0.98889 | RIKEN cDNA 6330563C09 gene                                                                                                                        | 6330563C09Rik |
| 1453808_at   | 0.83738 | RIKEN cDNA 2210416O15 gene                                                                                                                        | 2210416O15Rik |
| 1453809_at   | 1.08975 | Ly6/Plaur domain containing 5                                                                                                                     | Lypd5         |
| 1453810_at   | 1.37426 | aftiphilin                                                                                                                                        | Aftph         |
| 1453811_at   | 0.93275 | heat shock protein 9A                                                                                                                             | Hspa9a        |
| 1453812_at   | 0.97491 | janus kinase and microtubule interacting protein 2                                                                                                | Jakmip2       |
| 1453813_at   | 1.00270 | CD200 receptor 3                                                                                                                                  | Cd200r3       |
| 1453814_at   | 1.04555 | B-cell CLL/lymphoma 11A (zinc finger protein)                                                                                                     | Bcl11a        |
| 1453815_at   | 0.88599 | spindle pole body component 25 homolog (S. cerevisiae)                                                                                            | Spbc25        |
| 1453816_at   | 0.97934 | RIKEN cDNA 5730427N09 gene                                                                                                                        | 5730427N09Rik |
| 1453817_at   | 0.96874 | "ATP-binding cassette, sub-family A (ABC1), member 6"                                                                                             | Abca6         |
| 1453818_a_at | 0.94353 | RIKEN cDNA 9030025P20 gene                                                                                                                        | 9030025P20Rik |
| 1453819_x_at | 1.04360 | syntaxin 18                                                                                                                                       | Stx18         |
| 1453820_at   | 0.89312 | RIKEN cDNA A930005F02 gene /// suppressor of hairy wing homolog 4<br>(Drosophila) A930005F02Rik /// Suhw4                                         |               |
| 1453821_at   | 1.07730 | HemK methyltransferase family member 2                                                                                                            | Hemk2         |
| 1453822_at   | 1.10857 | RIKEN cDNA 1700010H15 gene                                                                                                                        | 1700010H15Rik |
| 1453823_a_at | 1.01223 | RIKEN cDNA A930028L21 gene                                                                                                                        | A930028L21Rik |
| 1453824_at   | 1.04472 | RIKEN cDNA A930028L21 gene                                                                                                                        | A930028L21Rik |
| 1453825_at   | 1.01711 | "Mammary gland RCB-0526 Jyg-MC(A) cDNA, RIKEN full-length enriched<br>library, clone:G830038F10 product:unclassifiable, full insert sequence" --- |               |
| 1453826_at   | 0.70879 | RIKEN cDNA 1810008K04 gene                                                                                                                        | 1810008K04Rik |
| 1453827_at   | 0.91437 | RIKEN cDNA 1110035H17 gene                                                                                                                        | 1110035H17Rik |
| 1453828_at   | 0.89194 | RIKEN cDNA 4932422M17 gene                                                                                                                        | 4932422M17Rik |
| 1453829_at   | 0.92603 | RIKEN cDNA 2310007J06 gene                                                                                                                        | 2310007J06Rik |
| 1453830_at   | 0.93040 | ---                                                                                                                                               | ---           |
| 1453831_at   | 1.11686 | transmembrane protein 138                                                                                                                         | Tmem138       |
| 1453832_at   | 1.00429 | RIKEN cDNA 5330430P22 gene                                                                                                                        | 5330430P22Rik |

1453833\_a\_at 1.09668 ribonuclease H1 Rnaseh1  
1453834\_at 0.93272 RIKEN cDNA 1500002C15 gene 1500002C15Rik  
1453835\_at 1.01742 RIKEN cDNA 4930505M18 gene 4930505M18Rik  
1453836\_a\_at 1.08776 monoglyceride lipase Mgl1  
1453837\_at 1.01263 RIKEN cDNA 6330500D04 gene 6330500D04Rik  
1453838\_at 1.04426 RIKEN cDNA 4930471G03 gene 4930471G03Rik  
1453839\_a\_at 1.01778 peptidase inhibitor 16 Pi16  
1453840\_at 1.56286 "poly A binding protein, cytoplasmic 1" Pabpc1  
1453841\_at 0.94699 RIKEN cDNA 2310050P20 gene 2310050P20Rik  
1453842\_at 0.83378 RIKEN cDNA 4930448K12 gene 4930448K12Rik  
1453843\_at 1.02154 THAP domain containing 6 Thap6  
1453844\_at 0.95915 chitinase 1 (chitotriosidase) Chit1  
1453845\_at 1.04487 RIKEN cDNA 4733401D01 gene 4733401D01Rik  
1453846\_at 0.96207 RIKEN cDNA 2810013C04 gene 2810013C04Rik  
1453847\_at 1.02830 RIKEN cDNA A930037O16 gene A930037O16Rik  
1453848\_s\_at 0.89131 "zinc finger, BED domain containing 3" Zbed3  
1453849\_s\_at 1.03881 heterogeneous nuclear ribonucleoprotein A/B Hnrpab  
1453850\_at 1.05733 RIKEN cDNA 1500002I01 gene 1500002I01Rik  
1453851\_a\_at 0.94868 growth arrest and DNA-damage-inducible 45 gamma Gadd45g  
1453852\_at 1.28372 RIKEN cDNA 8430408E17 gene 8430408E17Rik  
1453853\_a\_at 1.01325 Rho guanine nucleotide exchange factor (GEF) 12 Arhgef12  
1453854\_at 1.07970 protein prenyltransferase alpha subunit repeat containing 1 /// similar to protein prenyltransferase alpha subunit repeat containing 1 Ptar1 /// LOC676290  
1453855\_at 0.89970 RIKEN cDNA 1810057P16 gene 1810057P16Rik  
1453856\_at 0.87238 BTB (POZ) domain containing 4 Btbd4  
1453857\_at 1.00988 ring finger protein 180 Rnf180  
1453858\_at 1.09124 "solute carrier family 35 (UDP-galactose transporter), member 2" Slc35a2  
1453859\_at 0.90895 RIKEN cDNA 2410003P15 gene 2410003P15Rik  
1453860\_s\_at 0.75313 "nuclear receptor subfamily 3, group C, member 1" Nr3c1  
1453861\_at 0.90580 RIKEN cDNA C030014K22 gene C030014K22Rik  
1453862\_at 0.96126 RIKEN cDNA 4930465K10 gene 4930465K10Rik  
1453863\_at 1.10957 RIKEN cDNA 3300002P09 gene 3300002P09Rik  
1453864\_at 1.18636 retinol dehydrogenase 14 (all-trans and 9-cis) Rdh14  
1453865\_a\_at 1.00057 OTU domain containing 5 Otud5  
1453866\_a\_at 1.21700 Kell blood group precursor (McLeod phenotype) homolog Xkh  
1453867\_at 0.98189 F-box and WD-40 domain protein 2 Fbxw2  
1453868\_at 1.02534 coiled-coil domain containing 11 Ccdc11  
1453869\_at 1.10536 hypothetical protein LOC328277 LOC328277  
1453870\_at 0.93269 RIKEN cDNA 1810018F18 gene 1810018F18Rik  
1453871\_at 0.99340 "solute carrier family 6 (neurotransmitter transporter, GABA), member 11" Slc6a11  
1453872\_at 0.96557 doublesex and mab-3 related transcription factor like family C2 Dmrtd2  
1453873\_at 0.94553 RIKEN cDNA 4933421H06 gene 4933421H06Rik

1453874\_at 0.95655 RIKEN cDNA 4933401B06 gene 4933401B06Rik  
 1453875\_at 0.99293 "solute carrier family 7 (cationic amino acid transporter, y+ system), member 15" Slc7a15  
 1453876\_at 1.03156 hypothetical LOC621121 /// hypothetical protein LOC631862 /// RIKEN cDNA 1700120B22 gene LOC621121 /// LOC631862 /// 1700120B22Rik  
 1453877\_at 0.87622 RIKEN cDNA 4930467D21 gene 4930467D21Rik  
 1453878\_at 1.07874 ubiquitin protein ligase E3 component n-recognin 2 Ubr2  
 1453879\_at 1.08832 RIKEN cDNA 1700016H13 gene 1700016H13Rik  
 1453880\_s\_at 0.90497 RIKEN cDNA 1700041C02 gene 1700041C02Rik  
 1453881\_x\_at 1.05096 centrin 1 Cetn1  
 1453882\_at 0.99178 RIKEN cDNA 1700034F02 gene 1700034F02Rik  
 1453883\_at 0.90434 RIKEN cDNA 4933425B07 gene 4933425B07Rik  
 1453884\_at 0.95523 RIKEN cDNA 4930402K13 gene 4930402K13Rik  
 1453885\_at 1.02096 "solute carrier family 24 (sodium/potassium/calcium exchanger), member 2" Slc24a2  
 1453886\_a\_at 0.99358 "solute carrier family 25 (mitochondrial carrier, phosphate carrier), member 26" Slc25a26  
 1453887\_a\_at 1.06715 T-cell lymphoma invasion and metastasis 1 Tiam1  
 1453888\_at 0.96438 copine IV Cpne4  
 1453889\_at 1.11128 RIKEN cDNA 4930461C15 gene 4930461C15Rik  
 1453890\_at 0.90684 --- ---  
 1453891\_at 0.99144 polymerase I and transcript release factor Ptrf  
 1453892\_at 1.11351 RIKEN cDNA A930007I19 gene A930007I19Rik  
 1453893\_at 1.00534 RIKEN cDNA 4933412O06 gene 4933412O06Rik  
 1453894\_at 1.07839 RIKEN cDNA 4933434C23 gene 4933434C23Rik  
 1453895\_at 1.12991 RIKEN cDNA C330026N13 gene C330026N13Rik  
 1453896\_at 1.01610 PDZ domain containing 2 Pdzd2  
 1453897\_at 1.09401 RIKEN cDNA C030014A21 gene C030014A21Rik  
 1453898\_at 1.08623 integrin beta 1 binding protein 3 Itgb1bp3  
 1453899\_at 0.93029 --- ---  
 1453900\_at 0.82365 RIKEN cDNA 1700018A14 gene 1700018A14Rik  
 1453901\_at 0.88043 "aldolase 1, A isoform, pseudogene 2" Aldoa-ps2  
 1453902\_at 1.08877 eukaryotic translation initiation factor 2 alpha kinase 1 Eif2ak1  
 1453903\_at 0.89907 RIKEN cDNA 4930503B20 gene 4930503B20Rik  
 1453904\_at 0.97338 RIKEN cDNA 4930528G09 gene 4930528G09Rik  
 1453905\_at 0.95136 RIKEN cDNA 5033415L01 gene 5033415L01Rik  
 1453906\_at 1.28785 thyroid hormone receptor associated protein 2 Thrap2  
 1453907\_at 1.02904 RIKEN cDNA C030041B07 gene C030041B07Rik  
 1453908\_at 1.09079 "protein tyrosine phosphatase, receptor type, B" Ptprb  
 1453909\_at 0.88695 RIKEN cDNA 4930505N22 gene 4930505N22Rik  
 1453910\_at 0.96058 RIKEN cDNA 4930500A05 gene 4930500A05Rik  
 1453911\_at 0.87928 --- ---  
 1453912\_at 0.94468 zinc finger protein 558 Zfp558

1453913\_a\_at 1.09819 "transporter 2, ATP-binding cassette, sub-family B (MDR/TAP)" Tap2  
 1453914\_at 1.01141 heat shock protein 1 Hspb1  
 1453915\_a\_at 0.95364 "solute carrier family 37 (glycerol-3-phosphate transporter), member 3"  
 Slc37a3  
 1453916\_at 1.14887 RIKEN cDNA 4933431K23 gene 4933431K23Rik  
 1453917\_at 0.98526 interferon induced transmembrane protein 7 Ifitm7  
 1453918\_at 0.91393 RIKEN cDNA 4933426F18 gene 4933426F18Rik  
 1453919\_at 1.03131 RIKEN cDNA 2610028H24 gene 2610028H24Rik  
 1453920\_a\_at 1.08084 motile sperm domain containing 2 Mospd2  
 1453921\_at 0.89640 RIKEN cDNA 4930429F11 gene 4930429F11Rik  
 1453922\_at 1.09078 RIKEN cDNA 4921539H07 gene 4921539H07Rik  
 1453923\_at 0.93804 coiled-coil domain containing 83 Ccdc83  
 1453924\_a\_at 0.93643 prostaglandin F receptor Ptgfr  
 1453925\_at 0.96935 RIKEN cDNA 4930429F24 gene 4930429F24Rik  
 1453926\_at 1.09443 RAD54 like (*S. cerevisiae*) Rad54l  
 1453927\_at 0.98832 mitochondrial ribosomal protein L47 Mrpl47  
 1453928\_a\_at 1.06719 Sjogren syndrome antigen B Ssb  
 1453929\_at 0.97738 ring finger protein 24 Rnf24  
 1453930\_at 1.05165 RIKEN cDNA 1110015M06 gene 1110015M06Rik  
 1453931\_at 0.95280 "procollagen, type XIV, alpha 1" Col14a1  
 1453932\_at 0.76450 RIKEN cDNA 4931433A01 gene 4931433A01Rik  
 1453933\_at 0.97888 RIKEN cDNA 4933435E02 gene 4933435E02Rik  
 1453934\_at 0.97312 RIKEN cDNA 4930535C22 gene 4930535C22Rik  
 1453935\_a\_at 0.94223 coiled-coil domain containing 7 Ccdc7  
 1453936\_at 0.93477 --- ---  
 1453937\_at 1.00115 RIKEN cDNA 4933407G14 gene 4933407G14Rik  
 1453938\_at 1.02880 RIKEN cDNA 9330198N18 gene 9330198N18Rik  
 1453939\_x\_at 1.17958 hypothetical protein LOC677168 LOC677168  
 1453940\_at 1.08379 RIKEN cDNA 2810404M03 gene 2810404M03Rik  
 1453941\_at 1.01452 RIKEN cDNA 4930579P08 gene 4930579P08Rik  
 1453942\_at 0.97301 RIKEN cDNA 1700123I01 gene 1700123I01Rik  
 1453943\_a\_at 0.88354 "acid phosphatase, prostate" Acpp  
 1453944\_at 0.96426 RIKEN cDNA 5430435K18 gene 5430435K18Rik  
 1453945\_at 0.98801 RIKEN cDNA 2310005E17 gene 2310005E17Rik  
 1453946\_a\_at 0.97439 serologically defined colon cancer antigen 8 Sdccag8  
 1453947\_at 1.12974 kinesin family member 24 Kif24  
 1453948\_at 1.00455 RIKEN cDNA 4930529K09 gene 4930529K09Rik  
 1453949\_s\_at 0.98993 lysophospholipase 1 Lypl1  
 1453950\_a\_at 0.82695 X-ray repair complementing defective repair in Chinese hamster cells 2 Xrcc2  
 1453951\_a\_at 0.90914 "DNA segment, Chr 19, ERATO Doi 652, expressed /// similar to DNA  
 segment, Chr 19, ERATO Doi 652, expressed" D19Ertd652e /// LOC677118  
 1453952\_at 0.87842 RIKEN cDNA 4930572G02 gene 4930572G02Rik  
 1453953\_at 1.03136 RIKEN cDNA 9130015A21 gene 9130015A21Rik

|              |         |                                                                                                                            |                  |               |
|--------------|---------|----------------------------------------------------------------------------------------------------------------------------|------------------|---------------|
| 1453954_a_at | 0.99817 | mitochondrial ribosomal protein S5                                                                                         | Mrps5            |               |
| 1453955_a_at | 0.84452 | RIKEN cDNA 4930432H15                                                                                                      | gene             | 4930432H15Rik |
| 1453956_a_at | 0.91902 | PFTAIRE protein kinase 1                                                                                                   | Pftk1            |               |
| 1453957_a_at | 1.01823 | insulin-like growth factor 2 mRNA binding protein 3                                                                        | Igf2bp3          |               |
| 1453958_at   | 0.95888 | RIKEN cDNA 2610203C22                                                                                                      | gene             | 2610203C22Rik |
| 1453959_at   | 0.93213 | RIKEN cDNA 1700065O13                                                                                                      | gene             | 1700065O13Rik |
| 1453960_a_at | 0.98599 | "capping protein (actin filament) muscle Z-line, beta"                                                                     | Capzb            |               |
| 1453961_a_at | 0.89567 | motile sperm domain containing 3                                                                                           | Mospd3           |               |
| 1453962_at   | 0.99090 | profilin 3                                                                                                                 | Pfn3             |               |
| 1453963_at   | 1.17923 | RIKEN cDNA 1600014C23                                                                                                      | gene             | 1600014C23Rik |
| 1453964_at   | 0.87511 | RIKEN cDNA 1700021A07                                                                                                      | gene             | 1700021A07Rik |
| 1453965_at   | 1.06085 | RIKEN cDNA 4930432O09                                                                                                      | gene             | 4930432O09Rik |
| 1453966_at   | 0.95064 | RIKEN cDNA 2610008G14                                                                                                      | gene             | 2610008G14Rik |
| 1453967_at   | 0.96472 | RIKEN cDNA 1700093J21                                                                                                      | gene             | 1700093J21Rik |
| 1453968_at   | 1.12432 | RIKEN cDNA 4833439F03                                                                                                      | gene             | 4833439F03Rik |
| 1453969_at   | 0.95405 | prolactin-like protein C 4                                                                                                 | Prlpc4           |               |
| 1453970_at   | 0.99341 | RIKEN cDNA 4833417A11                                                                                                      | gene             | 4833417A11Rik |
| 1453971_at   | 0.93547 | RIKEN cDNA 2610015P09                                                                                                      | gene             | 2610015P09Rik |
| 1453972_x_at | 1.00205 | peroxisome proliferator activated receptor binding protein                                                                 | Pparbp           |               |
| 1453973_s_at | 0.95454 | RIKEN cDNA 2900057H02                                                                                                      | gene             | 2900057H02Rik |
| 1453974_at   | 0.92038 | RIKEN cDNA 1700023A20                                                                                                      | gene             | 1700023A20Rik |
| 1453975_a_at | 1.13441 | RIKEN cDNA 1700029M20                                                                                                      | gene             | 1700029M20Rik |
| 1453976_at   | 1.81780 | RIKEN cDNA 4432414F05                                                                                                      | gene             | 4432414F05Rik |
| 1453977_at   | 0.98105 | exocyst complex component 4                                                                                                | Exoc4            |               |
| 1453978_at   | 0.97980 | RIKEN cDNA 4921522H14                                                                                                      | gene             | 4921522H14Rik |
| 1453979_at   | 0.95539 | RNA binding motif protein 12B                                                                                              | Rbm12b           |               |
| 1453980_at   | 0.98145 | RIKEN cDNA 5330434G04                                                                                                      | gene             | 5330434G04Rik |
| 1453981_at   | 1.02376 | RIKEN cDNA 2900009I07                                                                                                      | gene             | 2900009I07Rik |
| 1453982_at   | 0.92150 | transformed mouse 3T3 cell double minute 4                                                                                 | Mdm4             |               |
| 1453983_a_at | 1.10080 | methyltransferase 10 domain containing                                                                                     | Mett10d          |               |
| 1453984_at   | 1.05240 | "phosphatidylinositol 3-kinase, regulatory subunit, polypeptide 2 (p85 beta) ///<br>interferon gamma inducible protein 30" | Pik3r2 /// Ifi30 |               |
| 1453985_at   | 1.04239 | RIKEN cDNA 0610007P08                                                                                                      | gene             | 0610007P08Rik |
| 1453986_at   | 0.84483 | "ligase III, DNA, ATP-dependent"                                                                                           | Lig3             |               |
| 1453987_at   | 1.07173 | BTB (POZ) domain containing 5                                                                                              | Btbd5            |               |
| 1453988_a_at | 1.05326 | insulin degrading enzyme                                                                                                   | Ide              |               |
| 1453989_at   | 1.09484 | syntaxin binding protein 4                                                                                                 | Stxbp4           |               |
| 1453990_at   | 1.05375 | RIKEN cDNA 4930554G24                                                                                                      | gene             | 4930554G24Rik |
| 1453991_at   | 0.91572 | centromere protein O                                                                                                       | Cenpo            |               |
| 1453992_at   | 1.00471 | zona pellucida binding protein                                                                                             | Zbp              |               |
| 1453993_a_at | 1.02501 | "BCL2/adenovirus E1B interacting protein 1, NIP2"                                                                          | Bnip2            |               |
| 1453994_at   | 1.05189 | RIKEN cDNA C230094A16                                                                                                      | gene             | C230094A16Rik |
| 1453995_a_at | 0.95874 | HpaII tiny fragments locus 9c                                                                                              | Htf9c            |               |



1453996\_a\_at 0.94809 cathepsin 3 Cts3  
1453997\_a\_at 1.02757 nestin Nes  
1453998\_at 1.04347 stromal membrane-associated protein 1 Smap1  
1453999\_at 1.09624 similar to Nucleolar preribosomal-associated protein 1 LOC670473  
1454000\_s\_at 0.84539 RIKEN cDNA 4930578N16 gene 4930578N16Rik  
1454001\_at 0.92340 --- ---  
1454002\_at 1.01002 --- ---  
1454003\_at 1.01170 AFG3(ATPase family gene 3)-like 2 (yeast) Afg3l2  
1454004\_at 0.89172 RIKEN cDNA 5033414K04 gene 5033414K04Rik  
1454005\_at 0.84632 flavin containing monooxygenase 2 Fmo2  
1454006\_a\_at 0.99822 UBX domain containing 6 Ubxd6  
1454007\_a\_at 1.00767 zinc finger protein 142 Zfp142  
1454008\_at 0.94841 protein arginine N-methyltransferase 3 Prmt3  
1454009\_at 1.03330 RIKEN cDNA 1700008O03 gene 1700008O03Rik  
1454010\_a\_at 1.02484 RIKEN cDNA 1700025E21 gene 1700025E21Rik  
1454011\_a\_at 0.99263 replication protein A2 Rpa2  
1454012\_a\_at 0.81688 "poly (ADP-ribose) polymerase family, member 6" Parp6  
1454013\_at 0.94277 RIKEN cDNA 1810062O18 gene 1810062O18Rik  
1454014\_a\_at 0.86137 McKusick-Kaufman syndrome protein Mkks  
1454015\_a\_at 1.41384 cadherin 13 Cdh13  
1454016\_at 0.95242 --- ---  
1454017\_at 0.93548 RIKEN cDNA 4921509O07 gene 4921509O07Rik  
1454018\_at 1.06747 tousled-like kinase 2 (Arabidopsis) Tlk2  
1454019\_at 0.83839 --- ---  
1454020\_at 0.94043 RIKEN cDNA 4930554H23 gene 4930554H23Rik  
1454021\_a\_at 1.09077 exosome component 10 Exosc10  
1454022\_at 1.20602 Eph receptor B2 Ephb2  
1454023\_a\_at 0.83172 "DNA segment, Chr 1, Brigham & Women's Genetics 1363 expressed"  
D1Bwg1363e  
1454024\_at 1.09833 leucine rich repeat containing 9 Lrrc9  
1454025\_at 0.98670 D-aspartate oxidase Ddo  
1454026\_a\_at 1.10615 regulator of G-protein signaling 3 Rgs3  
1454027\_at 0.88586 RIKEN cDNA 4930448N21 gene 4930448N21Rik  
1454028\_at 0.96325 RIKEN cDNA 4931402H11 gene 4931402H11Rik  
1454029\_at 1.05108 RIKEN cDNA 4930431F12 gene 4930431F12Rik  
1454030\_at 1.63188 "SAPS domain family, member 3" Saps3  
1454031\_at 1.09172 RIKEN cDNA 2310029O18 gene 2310029O18Rik  
1454032\_at 0.88431 neuropilin (NRP) and tolloid (TLL)-like 2 Neto2  
1454033\_at 1.01883 RIKEN cDNA 1700007B13 gene 1700007B13Rik  
1454034\_a\_at 0.98806 ubiquitin specific peptidase 21 Usp21  
1454035\_at 1.02456 RIKEN cDNA 3110009E22 gene 3110009E22Rik  
1454036\_a\_at 1.14284 ubiquitin specific peptidase 15 Usp15  
1454037\_a\_at 0.96846 FMS-like tyrosine kinase 1 Flt1

|              |         |                                                                            |                                                                 |
|--------------|---------|----------------------------------------------------------------------------|-----------------------------------------------------------------|
| 1454038_at   | 0.91944 | RIKEN cDNA 4833403I15 gene                                                 | 4833403I15Rik                                                   |
| 1454039_at   | 0.99523 | RIKEN cDNA 4921517D16 gene                                                 | 4921517D16Rik                                                   |
| 1454040_at   | 1.07003 | RIKEN cDNA 5730591J02 gene                                                 | 5730591J02Rik                                                   |
| 1454041_at   | 0.89616 | "DNA segment, Chr 14, ERATO Doi 581, expressed"                            | D14ErtD581e                                                     |
| 1454042_a_at | 1.08849 | serine/arginine-rich protein specific kinase 1                             | Srpk1                                                           |
| 1454043_a_at | 0.95038 | "potassium voltage-gated channel, shaker-related subfamily, beta member 1" | Kcnab1                                                          |
| 1454044_a_at | 0.89557 | peroxisomal biogenesis factor 3                                            | Pex3                                                            |
| 1454045_a_at | 1.04112 | phosphatidylglycerophosphate synthase 1                                    | Pgs1                                                            |
| 1454046_x_at | 1.11608 | phosphatidylglycerophosphate synthase 1                                    | Pgs1                                                            |
| 1454047_a_at | 0.97755 | RIKEN cDNA 2410017P07 gene                                                 | 2410017P07Rik                                                   |
| 1454048_a_at | 0.97196 | RIKEN cDNA 4931408A02 gene                                                 | /// similar to Protein C21orf63 homolog precursor 4931408A02Rik |
| 1454049_at   | 0.95091 | RIKEN cDNA 4933426G20 gene                                                 | 4933426G20Rik                                                   |
| 1454050_at   | 0.94692 | RIKEN cDNA 4921521D15 gene                                                 | 4921521D15Rik                                                   |
| 1454051_at   | 1.01104 | RIKEN cDNA 2600011E07 gene                                                 | 2600011E07Rik                                                   |
| 1454052_at   | 0.88385 | HORMA domain containing 2                                                  | Hormad2                                                         |
| 1454053_at   | 0.89616 | RIKEN cDNA 5730527A11 gene                                                 | 5730527A11Rik                                                   |
| 1454054_at   | 1.05721 | RIKEN cDNA 4930459I23 gene                                                 | 4930459I23Rik                                                   |
| 1454055_at   | 0.86329 | RIKEN cDNA 1600029O15 gene                                                 | 1600029O15Rik                                                   |
| 1454056_at   | 1.06109 | RIKEN cDNA 9030407P20 gene                                                 | 9030407P20Rik                                                   |
| 1454057_at   | 0.95642 | RIKEN cDNA 4930470B04 gene                                                 | 4930470B04Rik                                                   |
| 1454058_at   | 0.97508 | RIKEN cDNA 4931406E20 gene                                                 | 4931406E20Rik                                                   |
| 1454059_at   | 0.97920 | RIKEN cDNA 4930500F04 gene                                                 | 4930500F04Rik                                                   |
| 1454060_a_at | 1.04458 | neuroblastoma ras oncogene                                                 | Nras                                                            |
| 1454061_at   | 1.20470 | THUMP domain containing 3                                                  | Thumpd3                                                         |
| 1454062_at   | 1.03044 | RIKEN cDNA 4933402D24 gene                                                 | 4933402D24Rik                                                   |
| 1454063_at   | 0.90332 | RIKEN cDNA 4933412E24 gene                                                 | 4933412E24Rik                                                   |
| 1454064_a_at | 0.93500 | ring finger protein 138                                                    | Rnf138                                                          |
| 1454065_at   | 0.95367 | RIKEN cDNA 4930562D21 gene                                                 | 4930562D21Rik                                                   |
| 1454066_at   | 0.93707 | myc induced nuclear antigen                                                | Mina                                                            |
| 1454067_a_at | 0.91637 | RIKEN cDNA 4931406C07 gene                                                 | 4931406C07Rik                                                   |
| 1454068_at   | 1.00921 | RIKEN cDNA 4930470H14 gene                                                 | 4930470H14Rik                                                   |
| 1454069_at   | 1.00082 | RIKEN cDNA 9030409C19 gene                                                 | 9030409C19Rik                                                   |
| 1454070_a_at | 0.92548 | DDHD domain containing 1                                                   | Ddhd1                                                           |
| 1454071_at   | 1.06143 | "lymphocyte antigen 6 complex, locus K"                                    | Ly6k                                                            |
| 1454072_at   | 0.87109 | RIKEN cDNA 4731417B20 gene                                                 | 4731417B20Rik                                                   |
| 1454073_at   | 1.23000 | RIKEN cDNA 4930455D15 gene                                                 | 4930455D15Rik                                                   |
| 1454074_a_at | 0.95568 | RIKEN cDNA 1500011J06 gene                                                 | 1500011J06Rik                                                   |
| 1454075_s_at | 1.03657 | nudix (nucleoside diphosphate linked moiety X)-type motif 13               | Nudt13                                                          |
| 1454076_at   | 1.06678 | leucine rich repeat containing 17                                          | Lrrc17                                                          |
| 1454077_at   | 0.99266 | vesicle transport through interaction with t-SNAREs homolog 1A (yeast)     | Vti1a                                                           |
| 1454078_a_at | 0.88374 | galactose-3-O-sulfotransferase 1                                           | Gal3st1                                                         |

|              |         |                                                                                 |               |
|--------------|---------|---------------------------------------------------------------------------------|---------------|
| 1454079_at   | 1.06564 | RIKEN cDNA 4933400F03 gene                                                      | 4933400F03Rik |
| 1454080_at   | 1.10832 | RIKEN cDNA 4933428M03 gene                                                      | 4933428M03Rik |
| 1454081_at   | 1.04534 | ---                                                                             | ---           |
| 1454082_a_at | 0.90655 | GIY-YIG domain containing 2                                                     | Giyd2         |
| 1454083_at   | 1.00652 | RIKEN cDNA 4930440C22 gene                                                      | 4930440C22Rik |
| 1454084_a_at | 0.92967 | SUMO/sentrin specific peptidase 8                                               | Senp8         |
| 1454085_at   | 0.94709 | RIKEN cDNA 4933409D19 gene                                                      | 4933409D19Rik |
| 1454086_a_at | 0.84707 | LIM domain only 2                                                               | Lmo2          |
| 1454087_at   | 0.88023 | zinc fingerprotein 618                                                          | Zfp618        |
| 1454088_at   | 0.96169 | RIKEN cDNA 5330411O13 gene                                                      | 5330411O13Rik |
| 1454089_at   | 1.01110 | "apolipoprotein B mRNA editing enzyme, catalytic polypeptide-like 4 (putative)" | Apobec4       |
| 1454090_at   | 1.33520 | "prenyl (solanesyl) diphosphate synthase, subunit 1"                            | Pdss1         |
| 1454091_at   | 0.89748 | pregnancy-specific glycoprotein 21                                              | Psg21         |
| 1454092_a_at | 0.92332 | "general transcription factor IIIH, polypeptide 3"                              | Gtf2h3        |
| 1454093_at   | 0.95135 | RIKEN cDNA 4933436I20 gene                                                      | 4933436I20Rik |
| 1454094_at   | 1.04345 | RIKEN cDNA 4930471E19 gene                                                      | 4930471E19Rik |
| 1454095_at   | 1.08929 | RIKEN cDNA 4930579H20 gene                                                      | 4930579H20Rik |
| 1454096_a_at | 0.89679 | RIKEN cDNA 4930555I21 gene                                                      | 4930555I21Rik |
| 1454097_at   | 1.15053 | "zinc finger, CW type with PWWP domain 2"                                       | Zcwpw2        |
| 1454098_at   | 1.12446 | olfactory receptor 112                                                          | Olf112        |
| 1454099_at   | 0.86599 | RIKEN cDNA 4930593A02 gene                                                      | 4930593A02Rik |
| 1454100_at   | 0.96073 | RIKEN cDNA 4930480E11 gene                                                      | 4930480E11Rik |
| 1454101_at   | 0.91115 | RIKEN cDNA 4933401P06 gene                                                      | 4933401P06Rik |
| 1454102_at   | 0.86769 | RIKEN cDNA 5031425E22 gene                                                      | 5031425E22Rik |
| 1454103_at   | 0.86087 | dynein heavy chain domain 3                                                     | Dnhd3         |
| 1454104_a_at | 0.95021 | "solute carrier family 16 (monocarboxylic acid transporters), member 9"         | Slc16a9       |
| 1454105_at   | 1.04459 | ---                                                                             | ---           |
| 1454106_a_at | 0.84959 | CXXC finger 1 (PHD domain)                                                      | Cxxc1         |
| 1454107_a_at | 0.88405 | kinesin family member 2A                                                        | Kif2a         |
| 1454108_at   | 1.01125 | RIKEN cDNA 4930524O08 gene                                                      | 4930524O08Rik |
| 1454109_a_at | 1.43731 | phosphatidylserine receptor                                                     | Ptdsr         |
| 1454110_at   | 1.00081 | RIKEN cDNA 4930408K08 gene                                                      | 4930408K08Rik |
| 1454111_at   | 0.92832 | RIKEN cDNA 4930404A10 gene                                                      | 4930404A10Rik |
| 1454112_a_at | 1.13770 | centrosomal protein 27                                                          | Cep27         |
| 1454113_at   | 0.97096 | RIKEN cDNA 4930472D12 gene                                                      | 4930472D12Rik |
| 1454114_a_at | 1.02169 | RIKEN cDNA 4933425K02 gene                                                      | 4933425K02Rik |
| 1454115_at   | 1.05055 | RIKEN cDNA 4930572J10 gene                                                      | 4930572J10Rik |
| 1454116_a_at | 0.98159 | MTERF domain containing 1                                                       | Mterfd1       |
| 1454117_at   | 0.88812 | RIKEN cDNA 5330439B14 gene                                                      | 5330439B14Rik |
| 1454118_at   | 0.96169 | RIKEN cDNA 5830410O09 gene                                                      | 5830410O09Rik |
| 1454119_at   | 0.96493 | MAP kinase-interacting serine/threonine kinase 1                                | Mknk1         |

|              |         |                                                                                   |               |  |
|--------------|---------|-----------------------------------------------------------------------------------|---------------|--|
| 1454120_a_at | 1.21400 | polycomb group ring finger 6                                                      | Pcgf6         |  |
| 1454121_x_at | 1.05297 | coiled-coil domain containing 18                                                  | Ccdc18        |  |
| 1454122_at   | 0.92432 | RIKEN cDNA 1810011H11 gene                                                        | 1810011H11Rik |  |
| 1454123_at   | 0.99999 | RIKEN cDNA 4933406K04 gene                                                        | 4933406K04Rik |  |
| 1454124_at   | 0.93913 | RIKEN cDNA 1700067K01 gene                                                        | 1700067K01Rik |  |
| 1454125_a_at | 0.98751 | RIKEN cDNA 4930563E19 gene                                                        | 4930563E19Rik |  |
| 1454126_at   | 0.96556 | RIKEN cDNA 0710001A04 gene                                                        | 0710001A04Rik |  |
| 1454127_at   | 0.98327 | RIKEN cDNA 1010001I08 gene                                                        | 1010001I08Rik |  |
| 1454128_at   | 0.86288 | RIKEN cDNA 4930413E15 gene                                                        | 4930413E15Rik |  |
| 1454129_at   | 0.98690 | RIKEN cDNA 4933416M06 gene                                                        | 4933416M06Rik |  |
| 1454130_at   | 1.01886 | RIKEN cDNA 4930432J01 gene                                                        | 4930432J01Rik |  |
| 1454131_at   | 1.11852 | RIKEN cDNA 4931413K12 gene                                                        | 4931413K12Rik |  |
| 1454132_at   | 1.13415 | RIKEN cDNA 7630402F16 gene                                                        | 7630402F16Rik |  |
| 1454133_s_at | 1.13263 | RIKEN cDNA 4930523O13 gene                                                        | 4930523O13Rik |  |
| 1454134_at   | 0.96846 | RIKEN cDNA 5730412P04 gene                                                        | 5730412P04Rik |  |
| 1454135_at   | 1.02054 | RIKEN cDNA 4930458K08 gene                                                        | 4930458K08Rik |  |
| 1454136_a_at | 0.93833 | RIKEN cDNA 4921524J17 gene                                                        | 4921524J17Rik |  |
| 1454137_s_at | 0.88736 | hemochromatosis type 2 (juvenile) (human homolog)                                 | Hfe2          |  |
| 1454138_a_at | 1.05566 | serine threonine kinase 31                                                        | Stk31         |  |
| 1454139_at   | 0.93133 | RIKEN cDNA 4930405N21 gene                                                        | 4930405N21Rik |  |
| 1454140_at   | 0.97268 | Neural cell adhesion molecule 1                                                   | Ncam1         |  |
| 1454141_at   | 1.37482 | RIKEN cDNA 5730416O20 gene                                                        | 5730416O20Rik |  |
| 1454142_a_at | 1.07207 | PWP1 homolog ( <i>S. cerevisiae</i> )                                             | Pwp1          |  |
| 1454143_at   | 0.99292 | RIKEN cDNA 4930442H23 gene                                                        | 4930442H23Rik |  |
| 1454144_a_at | 0.98484 | cyclin C                                                                          | Ccnc          |  |
| 1454145_at   | 0.94031 | phospholipase A2 receptor 1                                                       | Pla2r1        |  |
| 1454146_at   | 0.85868 | RIKEN cDNA 9530036M11 gene                                                        | 9530036M11Rik |  |
| 1454147_at   | 1.01723 | RIKEN cDNA 2810429I04 gene                                                        | 2810429I04Rik |  |
| 1454148_at   | 1.02396 | RIKEN cDNA 4930443B20 gene                                                        | 4930443B20Rik |  |
| 1454149_a_at | 1.11509 | cyclin L2                                                                         | Ccnl2         |  |
| 1454150_at   | 0.95358 | RIKEN cDNA 4930453O03 gene                                                        | 4930453O03Rik |  |
| 1454151_at   | 1.00121 | transmembrane protein 167                                                         | Tmem167       |  |
| 1454152_a_at | 1.02760 | "G protein-coupled receptor kinase 2, groucho gene related ( <i>Drosophila</i> )" | Gprk21        |  |
| 1454153_at   | 0.86993 | RIKEN cDNA 4930556J24 gene                                                        | 4930556J24Rik |  |
| 1454154_at   | 0.95104 | RIKEN cDNA 4933416I08 gene                                                        | 4933416I08Rik |  |
| 1454155_at   | 0.96352 | RIKEN cDNA 4930500H12 gene                                                        | 4930500H12Rik |  |
| 1454156_at   | 0.93256 | RIKEN cDNA A230104H11 gene                                                        | A230104H11Rik |  |
| 1454157_a_at | 1.00553 | "phospholipase A2, group IID"                                                     | Pla2g2d       |  |
| 1454158_at   | 1.15227 | "membrane protein, palmitoylated 7 (MAGUK p55 subfamily member 7)"                | Mpp7          |  |
| 1454159_a_at | 0.99863 | insulin-like growth factor binding protein 2                                      | Igfbp2        |  |
| 1454160_at   | 0.94190 | RIKEN cDNA 4930483C13 gene                                                        | 4930483C13Rik |  |

|              |         |                                                                                         |        |               |
|--------------|---------|-----------------------------------------------------------------------------------------|--------|---------------|
| 1454161_s_at | 1.19073 | RIKEN cDNA 0610007P14                                                                   | gene   | 0610007P14Rik |
| 1454162_at   | 0.94220 | RIKEN cDNA 4930518P08                                                                   | gene   | 4930518P08Rik |
| 1454163_at   | 1.14700 | RIKEN cDNA 5730420D15                                                                   | gene   | 5730420D15Rik |
| 1454164_at   | 0.97506 | RIKEN cDNA 4921523L03                                                                   | gene   | 4921523L03Rik |
| 1454165_at   | 0.98078 | RIKEN cDNA 1700025K04                                                                   | gene   | 1700025K04Rik |
| 1454166_at   | 1.01445 | RIKEN cDNA 1700040N02                                                                   | gene   | 1700040N02Rik |
| 1454167_at   | 0.95776 | "nuclear receptor subfamily 2, group C, member 2"                                       |        | Nr2c2         |
| 1454168_a_at | 1.04127 | ClpB caseinolytic peptidase B homolog (E. coli)                                         | ClpB   |               |
| 1454169_a_at | 0.89763 | epithelial stromal interaction 1 (breast)                                               | Epsti1 |               |
| 1454170_at   | 0.94659 | RIKEN cDNA E130101E03                                                                   | gene   | E130101E03Rik |
| 1454171_x_at | 1.02737 | RIKEN cDNA 9530053H05                                                                   | gene   | 9530053H05Rik |
| 1454172_at   | 1.25996 | BCL6 co-repressor-like 1                                                                | Bcorl1 |               |
| 1454173_at   | 0.93462 | SH2 domain containing 4B                                                                | Sh2d4b |               |
| 1454174_a_at | 1.03516 | RIKEN cDNA C330007P06                                                                   | gene   | C330007P06Rik |
| 1454175_at   | 1.09025 | RIKEN cDNA 4930517N10                                                                   | gene   | 4930517N10Rik |
| 1454176_at   | 1.00672 | "excision repair cross-complementing rodent repair deficiency, complementation group 8" | Ercc8  |               |
| 1454177_at   | 1.01567 | RIKEN cDNA 4930597G03                                                                   | gene   | 4930597G03Rik |
| 1454178_at   | 0.93021 | RIKEN cDNA 2610027F03                                                                   | gene   | 2610027F03Rik |
| 1454179_at   | 1.00618 | RIKEN cDNA 4933406K04                                                                   | gene   | 4933406K04Rik |
| 1454180_at   | 0.97691 | armadillo repeat containing 2                                                           | Armc2  |               |
| 1454181_at   | 1.05108 | RIKEN cDNA 4930519B02                                                                   | gene   | 4930519B02Rik |
| 1454182_at   | 1.54345 | RIKEN cDNA 5430417C01                                                                   | gene   | 5430417C01Rik |
| 1454183_at   | 0.98321 | RIKEN cDNA 3100004P22                                                                   | gene   | 3100004P22Rik |
| 1454184_a_at | 0.97134 | inhibitor of kappaB kinase beta                                                         | Ikbkb  |               |
| 1454185_at   | 1.08277 | RIKEN cDNA 4933436E23                                                                   | gene   | 4933436E23Rik |
| 1454186_a_at | 0.80022 | RIKEN cDNA 2310051N18                                                                   | gene   | 2310051N18Rik |
| 1454187_at   | 1.01101 | polycystic kidney disease 1 like 2                                                      | Pkd1l2 |               |
| 1454188_at   | 0.99350 | RIKEN cDNA 4921508D12                                                                   | gene   | 4921508D12Rik |
| 1454189_at   | 1.03731 | RIKEN cDNA 4930557J02                                                                   | gene   | 4930557J02Rik |
| 1454190_at   | 1.15376 | RIKEN cDNA 9630013K17                                                                   | gene   | 9630013K17Rik |
| 1454191_at   | 0.91221 | RIKEN cDNA A030007E19                                                                   | gene   | A030007E19Rik |
| 1454192_at   | 0.91944 | RIKEN cDNA 4930579C15                                                                   | gene   | 4930579C15Rik |
| 1454193_at   | 0.90069 | RIKEN cDNA 5430401H09                                                                   | gene   | 5430401H09Rik |
| 1454194_at   | 1.06443 | RIKEN cDNA 9330118I20                                                                   | gene   | 9330118I20Rik |
| 1454195_at   | 0.95390 | RIKEN cDNA 4933433G19                                                                   | gene   | 4933433G19Rik |
| 1454196_at   | 0.89715 | RIKEN cDNA 4930568A13                                                                   | gene   | 4930568A13Rik |
| 1454197_a_at | 1.05049 | coiled-coil domain containing 86                                                        | Ccdc86 |               |
| 1454198_a_at | 1.00108 | EF hand calcium binding domain 1                                                        | Efcab1 |               |
| 1454199_at   | 0.95277 | RIKEN cDNA 1700014N06                                                                   | gene   | 1700014N06Rik |
| 1454200_at   | 1.05374 | zinc finger homeobox 1b                                                                 | Zfx1b  |               |
| 1454201_a_at | 0.89714 | RIKEN cDNA 5730405I09                                                                   | gene   | 5730405I09Rik |
| 1454202_a_at | 1.02094 | RIKEN cDNA 1700061J05                                                                   | gene   | 1700061J05Rik |

1454203\_at 0.82509 RIKEN cDNA 1700061J05 gene 1700061J05Rik  
1454204\_at 1.01796 RIKEN cDNA 4930442G10 gene 4930442G10Rik  
1454205\_at 1.27382 RIKEN cDNA 4930448A20 gene 4930448A20Rik  
1454206\_a\_at 0.88261 a disintegrin and metallopeptidase domain 15 (metargidin) Adam15  
1454207\_at 1.05711 RIKEN cDNA C430039J16 gene C430039J16Rik  
1454208\_at 0.86730 RIKEN cDNA 4930483O08 gene 4930483O08Rik  
1454209\_at 0.95355 RIKEN cDNA 1500016O10 gene 1500016O10Rik  
1454210\_at 0.90367 RIKEN cDNA 4933428M09 gene 4933428M09Rik  
1454211\_a\_at 1.03208 shroom family member 3 Shroom3  
1454212\_x\_at 0.99468 gasdermin domain containing 2 /// RIKEN cDNA 4933426G20 gene ///  
RIKEN cDNA 1700065I16 gene /// similar to gasdermin 1 Gsdmdc2 /// 4933426G20Rik ///  
1700065I16Rik /// LOC665769  
1454213\_at 1.10252 armadillo repeat containing 9 Armc9  
1454214\_a\_at 1.11478 RIKEN cDNA 2410019A14 gene 2410019A14Rik  
1454215\_at 0.92573 RIKEN cDNA 2410007B07 gene 2410007B07Rik  
1454216\_at 0.88708 RIKEN cDNA 4930408F14 gene 4930408F14Rik  
1454217\_at 0.98913 RIKEN cDNA 4930556N09 gene 4930556N09Rik  
1454218\_at 1.08443 RIKEN cDNA 4930405D01 gene 4930405D01Rik  
1454219\_at 0.99161 "DnaJ (Hsp40) homolog, subfamily C, member 2" Dnajc2  
1454220\_at 0.97070 RIKEN cDNA 9330185C12 gene 9330185C12Rik  
1454221\_a\_at 0.98265 kinesin family member 2C Kif2c  
1454222\_a\_at 1.01933 coiled-coil domain containing 13 Ccdc13  
1454223\_at 0.97249 RIKEN cDNA 4933423P22 gene 4933423P22Rik  
1454224\_at 1.07542 RIKEN cDNA 2010300F17 gene 2010300F17Rik  
1454225\_s\_at 0.91451 "DNA segment, Chr 3, ERATO Doi 751, expressed" D3Ertd751e  
1454226\_at 0.94232 RIKEN cDNA 4931403M11 gene 4931403M11Rik  
1454227\_at 0.99770 "HIV-1 tat interactive protein 2, homolog (human)" Htatip2  
1454228\_a\_at 1.05111 coiled-coil domain containing 77 Ccdc77  
1454229\_a\_at 0.94178 exonuclease domain containing 1 Exod1  
1454230\_a\_at 0.93086 "solute carrier family 25, member 27" Slc25a27  
1454231\_a\_at 1.01108 retinitis pigmentosa GTPase regulator interacting protein 1 Rpgrip1  
1454232\_at 0.89609 RIKEN cDNA 9430027B09 gene 9430027B09Rik  
1454233\_at 1.00608 RIKEN cDNA 2310006M14 gene 2310006M14Rik  
1454234\_at 0.87431 Williams-Beuren syndrome chromosome region 28 (human) Wbscr28  
1454235\_a\_at 1.12137 "inhibitor of growth family, member 5" Ing5  
1454236\_a\_at 1.11176 RIKEN cDNA C030004A17 gene C030004A17Rik  
1454237\_at 1.05317 spermatogenesis associated 9 Spata9  
1454238\_a\_at 0.91954 RIKEN cDNA 1700010H22 gene 1700010H22Rik  
1454239\_at 0.97048 RIKEN cDNA 4930578G10 gene 4930578G10Rik  
1454240\_at 1.03763 "nuclear factor, erythroid derived 2, like 3" Nfe2l3  
1454241\_at 1.04674 RWD domain containing 1 Rwdd1  
1454242\_at 0.73161 RIKEN cDNA 2310079G19 gene 2310079G19Rik  
1454243\_at 1.33174 intestinal cell kinase Ick

|              |         |                                                                                  |               |
|--------------|---------|----------------------------------------------------------------------------------|---------------|
| 1454244_at   | 0.93375 | minichromosome maintenance deficient 10 ( <i>S. cerevisiae</i> )                 | Mcm10         |
| 1454245_at   | 0.97205 | CUB and Sushi multiple domains 3                                                 | Csmd3         |
| 1454246_at   | 1.06683 | "ST3 beta-galactoside alpha-2,3-sialyltransferase 6"                             | St3gal6       |
| 1454247_a_at | 1.05222 | glycoprotein A33 (transmembrane)                                                 | Gpa33         |
| 1454248_at   | 0.99384 | RIKEN cDNA 1700041E20 gene                                                       | 1700041E20Rik |
| 1454249_at   | 0.99395 | RIKEN cDNA D530049N12 gene                                                       | D530049N12Rik |
| 1454250_at   | 0.88687 | SEC15-like 2 ( <i>S. cerevisiae</i> )                                            | Sec15l2       |
| 1454251_at   | 0.98822 | RIKEN cDNA 1700034J04 gene                                                       | 1700034J04Rik |
| 1454252_at   | 0.87438 | RIKEN cDNA 8030453O22 gene                                                       | 8030453O22Rik |
| 1454253_at   | 0.89395 | RIKEN cDNA 2810452K22 gene                                                       | 2810452K22Rik |
| 1454254_s_at | 0.97213 | RIKEN cDNA 1600029D21 gene                                                       | 1600029D21Rik |
| 1454255_at   | 1.12044 | RIKEN cDNA 5430434F05 gene                                                       | 5430434F05Rik |
| 1454256_s_at | 0.90621 | RIKEN cDNA 1700113I22 gene                                                       | 1700113I22Rik |
| 1454257_at   | 1.16581 | "serine palmitoyltransferase, long chain base subunit 2"                         | Sptlc2        |
| 1454258_at   | 0.98085 | RIKEN cDNA 1110008E08 gene                                                       | 1110008E08Rik |
| 1454259_s_at | 0.96033 | RIKEN cDNA 4931433A01 gene                                                       | 4931433A01Rik |
| 1454260_at   | 0.87745 | U2AF homology motif (UHM) kinase 1                                               | Uhmk1         |
| 1454261_at   | 0.83003 | RIKEN cDNA E130304I02 gene                                                       | E130304I02Rik |
| 1454262_at   | 0.89215 | RIKEN cDNA 1700124P09 gene                                                       | 1700124P09Rik |
| 1454263_at   | 0.92721 | goosecoid-like                                                                   | Gscl          |
| 1454264_at   | 1.02578 | RIKEN cDNA 2310046K23 gene                                                       | 2310046K23Rik |
| 1454265_a_at | 1.04946 | "ATP-binding cassette, sub-family B (MDR/TAP), member 10"                        | Abcb10        |
| 1454266_at   | 1.05941 | claudin domain containing 2                                                      | Cldnd2        |
| 1454267_a_at | 1.03431 | "protease, serine, 32"                                                           | Prss32        |
| 1454268_a_at | 1.22094 | "cytochrome b-245, alpha polypeptide"                                            | Cyba          |
| 1454269_s_at | 0.96624 | RIKEN cDNA 4930519L02 gene                                                       | 4930519L02Rik |
| 1454270_at   | 0.92432 | galectin-related inter-fiber protein                                             | Grifin        |
| 1454271_at   | 0.98595 | RIKEN cDNA 1810013D15 gene                                                       | 1810013D15Rik |
| 1454272_at   | 0.95117 | RIKEN cDNA 9630015K15 gene                                                       | 9630015K15Rik |
| 1454273_at   | 1.00066 | RIKEN cDNA 1700025H01 gene                                                       | 1700025H01Rik |
| 1454274_at   | 1.13040 | RIKEN cDNA 4930571C24 gene                                                       | 4930571C24Rik |
| 1454275_at   | 1.00892 | ---                                                                              | ---           |
| 1454276_at   | 0.87545 | RIKEN cDNA 1700021O21 gene                                                       | 1700021O21Rik |
| 1454277_at   | 0.91658 | RIKEN cDNA 1700049J03 gene                                                       | 1700049J03Rik |
| 1454278_at   | 1.06464 | RIKEN cDNA A430105D02 gene                                                       | A430105D02Rik |
| 1454279_at   | 1.04697 | ornithine decarboxylase antizyme 3                                               | Oaz3          |
| 1454280_at   | 1.17224 | RIKEN cDNA 4931406H21 gene                                                       | 4931406H21Rik |
| 1454281_at   | 0.97091 | RIKEN cDNA 4930506C02 gene                                                       | 4930506C02Rik |
| 1454282_at   | 0.91437 | RIKEN cDNA 1700084C06 gene                                                       | 1700084C06Rik |
| 1454283_at   | 1.01110 | RIKEN cDNA 9130023D20 gene                                                       | 9130023D20Rik |
| 1454284_at   | 1.21711 | "solute carrier family 25 (mitochondrial carrier, phosphate carrier), member 25" | Slc25a25      |
| 1454285_at   | 1.02495 | RIKEN cDNA 2900042E19 gene                                                       | 2900042E19Rik |

|            |         |                                                                                                    |                                                                    |               |
|------------|---------|----------------------------------------------------------------------------------------------------|--------------------------------------------------------------------|---------------|
| 1454286_at | 1.99186 | RIKEN cDNA 1110004M10                                                                              | gene                                                               | 1110004M10Rik |
| 1454287_at | 0.90318 | RIKEN cDNA 4931428A05                                                                              | gene                                                               | 4931428A05Rik |
| 1454288_at | 1.12282 | RIKEN cDNA 5830468K08                                                                              | gene                                                               | 5830468K08Rik |
| 1454289_at | 0.91266 | zinc fingers and homeoboxes 3                                                                      |                                                                    | Zhx3          |
| 1454290_at | 1.07743 | RIKEN cDNA 4930573O21                                                                              | gene                                                               | 4930573O21Rik |
| 1454291_at | 0.93375 | RIKEN cDNA 4933428P19                                                                              | gene                                                               | 4933428P19Rik |
| 1454292_at | 0.92214 | germ cell-less homolog 1 (Drosophila)                                                              |                                                                    | Gmcl1         |
| 1454293_at | 0.92435 | retinoblastoma-like 1 (p107)                                                                       |                                                                    | Rbl1          |
| 1454294_at | 0.89318 | RIKEN cDNA 2310061A09                                                                              | gene                                                               | 2310061A09Rik |
| 1454295_at | 1.19695 | nuclear receptor interacting protein 1                                                             |                                                                    | Nrip1         |
| 1454296_at | 0.90679 | RIKEN cDNA 4631402F24                                                                              | gene                                                               | 4631402F24Rik |
| 1454297_at | 1.08739 | RIKEN cDNA 4631402F24                                                                              | gene                                                               | 4631402F24Rik |
| 1454298_at | 1.11684 | RIKEN cDNA 4932430A15                                                                              | gene                                                               | 4932430A15Rik |
| 1454299_at | 1.18582 | RIKEN cDNA 4833422B07                                                                              | gene                                                               | 4833422B07Rik |
| 1454300_at | 0.92969 | RIKEN cDNA 4933424C09                                                                              | gene                                                               | 4933424C09Rik |
| 1454301_at | 1.87688 | RIKEN cDNA 2900073C17                                                                              | gene                                                               | 2900073C17Rik |
| 1454302_at | 1.13655 | RIKEN cDNA 5730410E19                                                                              | gene                                                               | 5730410E19Rik |
| 1454303_at | 0.97174 | epsin 2                                                                                            |                                                                    | Epn2          |
| 1454304_at | 0.92998 | epsin 2                                                                                            |                                                                    | Epn2          |
| 1454305_at | 1.00993 | chromobox homolog 3 (Drosophila HP1 gamma)                                                         |                                                                    | Cbx3          |
| 1454306_at | 0.92446 | similar to RIKEN cDNA 1190002C06                                                                   | gene                                                               | LOC672445     |
| 1454307_at | 1.05590 | RIKEN cDNA 1810058N15                                                                              | gene                                                               | 1810058N15Rik |
| 1454308_at | 1.06697 | similar to development- and differentiation-enhancing factor 2; PYK2 C terminus-associated protein | /// similar to development- and differentiation-enhancing factor 2 |               |
| 1454309_at | 1.10319 | RIKEN cDNA 2810002N01                                                                              | gene                                                               | 2810002N01Rik |
| 1454310_at | 0.92898 | RIKEN cDNA 5830490A12                                                                              | gene                                                               | 5830490A12Rik |
| 1454311_at | 1.11407 | ---                                                                                                | ---                                                                |               |
| 1454312_at | 1.01647 | RIKEN cDNA 2900097C17                                                                              | gene                                                               | 2900097C17Rik |
| 1454313_at | 1.05982 | epidermal growth factor receptor                                                                   |                                                                    | Egfr          |
| 1454314_at | 0.88712 | RIKEN cDNA 1700031K17                                                                              | gene                                                               | 1700031K17Rik |
| 1454315_at | 1.03792 | RIKEN cDNA 3300002A11                                                                              | gene                                                               | 3300002A11Rik |
| 1454316_at | 0.96387 | RIKEN cDNA 5830426C09                                                                              | gene                                                               | 5830426C09Rik |
| 1454317_at | 0.83350 | a disintegrin and metallopeptidase domain 1b                                                       |                                                                    | Adam1b        |
| 1454318_at | 1.04051 | RIKEN cDNA 2810403D21                                                                              | gene                                                               | 2810403D21Rik |
| 1454319_at | 0.86196 | RIKEN cDNA 4930402H05                                                                              | gene                                                               | 4930402H05Rik |
| 1454320_at | 0.96133 | RIKEN cDNA 5830420C07                                                                              | gene                                                               | 5830420C07Rik |
| 1454321_at | 0.81854 | RIKEN cDNA 1500005C15                                                                              | gene                                                               | 1500005C15Rik |
| 1454322_at | 1.03002 | RIKEN cDNA 4933404M09                                                                              | gene                                                               | 4933404M09Rik |
| 1454323_at | 1.01958 | RIKEN cDNA 5830433D23                                                                              | gene                                                               | 5830433D23Rik |
| 1454324_at | 1.03390 | RIKEN cDNA 4930487N04                                                                              | gene                                                               | 4930487N04Rik |
| 1454325_at | 1.02505 | RIKEN cDNA 4930487N04                                                                              | gene                                                               | 4930487N04Rik |
| 1454326_at | 1.01409 | RIKEN cDNA 1700017H01                                                                              | gene                                                               | 1700017H01Rik |



|              |         |                                                                             |         |               |
|--------------|---------|-----------------------------------------------------------------------------|---------|---------------|
| 1454327_at   | 0.91813 | RIKEN cDNA 4933430H06                                                       | gene    | 4933430H06Rik |
| 1454328_at   | 0.88559 | RIKEN cDNA 2900060K15                                                       | gene    | 2900060K15Rik |
| 1454329_at   | 1.03407 | RIKEN cDNA 4933415J04                                                       | gene    | 4933415J04Rik |
| 1454330_at   | 1.03799 | RIKEN cDNA 4933415J04                                                       | gene    | 4933415J04Rik |
| 1454331_at   | 1.12728 | RIKEN cDNA 9430092D12                                                       | gene    | 9430092D12Rik |
| 1454332_at   | 0.97153 | RIKEN cDNA 6030442H21                                                       | gene    | 6030442H21Rik |
| 1454333_at   | 0.93857 | "crystallin, gamma A"                                                       | Cryga   |               |
| 1454334_at   | 0.97367 | RIKEN cDNA 2810409C01                                                       | gene    | 2810409C01Rik |
| 1454335_at   | 0.92838 | RIKEN cDNA 9130214F15                                                       | gene    | 9130214F15Rik |
| 1454336_at   | 0.93390 | Cyclin C                                                                    | Ccnc    |               |
| 1454337_at   | 1.02452 | RIKEN cDNA 6330571C24                                                       | gene    | 6330571C24Rik |
| 1454338_at   | 1.06336 | BAT2 domain containing 1                                                    | Bat2d   |               |
| 1454339_at   | 0.94995 | RIKEN cDNA 4930551I15                                                       | gene    | 4930551I15Rik |
| 1454340_at   | 0.96279 | RIKEN cDNA 9530025H10                                                       | gene    | 9530025H10Rik |
| 1454341_at   | 0.94412 | RIKEN cDNA 4933404I11                                                       | gene    | 4933404I11Rik |
| 1454342_at   | 1.08581 | RIKEN cDNA C030007D22                                                       | gene    | C030007D22Rik |
| 1454343_at   | 1.09887 | RIKEN cDNA 6430710M23                                                       | gene    | 6430710M23Rik |
| 1454344_at   | 1.04341 | "solute carrier family 44, member 1"                                        | Slc44a1 |               |
| 1454345_at   | 1.09812 | RIKEN cDNA 1700081H04                                                       | gene    | 1700081H04Rik |
| 1454346_at   | 1.03577 | RIKEN cDNA 4930540E01                                                       | gene    | 4930540E01Rik |
| 1454347_at   | 0.98677 | RIKEN cDNA 4930540E01                                                       | gene    | 4930540E01Rik |
| 1454348_at   | 1.04644 | RIKEN cDNA 4933407C09                                                       | gene    | 4933407C09Rik |
| 1454349_at   | 0.97036 | RIKEN cDNA 2810487C13                                                       | gene    | 2810487C13Rik |
| 1454350_at   | 0.98683 | PDZ domain containing 6                                                     | Pdzd6   |               |
| 1454351_at   | 0.90219 | RIKEN cDNA 4933435C09                                                       | gene    | 4933435C09Rik |
| 1454352_at   | 0.93247 | RIKEN cDNA A930028O11                                                       | gene    | A930028O11Rik |
| 1454353_at   | 1.03737 | RIKEN cDNA 4833420D23                                                       | gene    | 4833420D23Rik |
| 1454354_at   | 1.16506 | RIKEN cDNA 8030476L19                                                       | gene    | 8030476L19Rik |
| 1454355_at   | 0.92388 | RIKEN cDNA 1810021M19                                                       | gene    | 1810021M19Rik |
| 1454356_at   | 0.89829 | RIKEN cDNA 1810021M19                                                       | gene    | 1810021M19Rik |
| 1454357_at   | 0.92334 | RIKEN cDNA 3110067C02                                                       | gene    | 3110067C02Rik |
| 1454358_at   | 1.04470 | RIKEN cDNA 2900060N12                                                       | gene    | 2900060N12Rik |
| 1454359_at   | 0.85530 | RIKEN cDNA 9530023I19                                                       | gene    | 9530023I19Rik |
| 1454360_at   | 1.13466 | RIKEN cDNA 4930418C01                                                       | gene    | 4930418C01Rik |
| 1454361_at   | 0.95505 | RIKEN cDNA 9230106L01                                                       | gene    | 9230106L01Rik |
| 1454362_at   | 0.98000 | RIKEN cDNA 8030431A06                                                       | gene    | 8030431A06Rik |
| 1454363_at   | 1.00796 | RIKEN cDNA 9430099H24                                                       | gene    | 9430099H24Rik |
| 1454364_at   | 1.02935 | RIKEN cDNA 9530025L08                                                       | gene    | 9530025L08Rik |
| 1454365_at   | 0.95724 | RIKEN cDNA 4930554P06                                                       | gene    | 4930554P06Rik |
| 1454366_at   | 0.91163 | RIKEN cDNA 4833419A21                                                       | gene    | 4833419A21Rik |
| 1454367_at   | 1.00783 | RIKEN cDNA 4930413G21                                                       | gene    | 4930413G21Rik |
| 1454368_at   | 1.01417 | "proteasome (prosome, macropain) 26S subunit, non-ATPase, 7"                | Psmid7  |               |
| 1454369_a_at | 1.05458 | "nuclear factor of activated T-cells, cytoplasmic, calcineurin-dependent 4" |         |               |

## Nfatc4

|              |         |                                                                                                   |               |
|--------------|---------|---------------------------------------------------------------------------------------------------|---------------|
| 1454370_at   | 0.96721 | RIKEN cDNA 4930557B21 gene                                                                        | 4930557B21Rik |
| 1454371_at   | 0.94674 | synaptophysin-like 2 Sypl2                                                                        |               |
| 1454372_at   | 0.83842 | CD80 antigen Cd80                                                                                 |               |
| 1454373_x_at | 0.98631 | ubiquitin C Ubc                                                                                   |               |
| 1454374_at   | 0.99911 | RIKEN cDNA 5730458M16 gene                                                                        | 5730458M16Rik |
| 1454375_at   | 1.05233 | RIKEN cDNA 5730458M16 gene                                                                        | 5730458M16Rik |
| 1454376_at   | 0.93686 | RIKEN cDNA 4833410I11 gene                                                                        | 4833410I11Rik |
| 1454377_at   | 0.99553 | RIKEN cDNA 2700080J24 gene                                                                        | 2700080J24Rik |
| 1454378_at   | 1.15121 | "Tyrosine 3-monooxygenase/tryptophan 5-monooxygenase activation protein, theta polypeptide" Ywhaq |               |
| 1454379_at   | 1.05555 | RIKEN cDNA 5730405O12 gene                                                                        | 5730405O12Rik |
| 1454380_at   | 0.88055 | phosphatase and actin regulator 4 Phactr4                                                         |               |
| 1454381_at   | 1.00498 | RIKEN cDNA 5033428C03 gene                                                                        | 5033428C03Rik |
| 1454382_at   | 1.03787 | sterile alpha motif domain containing 4 Samd4                                                     |               |
| 1454383_at   | 1.03249 | RIKEN cDNA 5430434G16 gene                                                                        | 5430434G16Rik |
| 1454384_at   | 1.05423 | RIKEN cDNA 2900057C01 gene                                                                        | 2900057C01Rik |
| 1454385_at   | 0.89986 | RIKEN cDNA 1700018P08 gene                                                                        | 1700018P08Rik |
| 1454386_at   | 1.02000 | RIKEN cDNA 6430500D05 gene                                                                        | 6430500D05Rik |
| 1454387_at   | 0.84978 | pannexin 3 Panx3                                                                                  |               |
| 1454388_at   | 1.57853 | RIKEN cDNA 2900046F13 gene                                                                        | 2900046F13Rik |
| 1454389_at   | 0.87383 | Leucine-rich repeats and calponin homology (CH) domain containing 4 Lrch4                         | Lrch4         |
| 1454390_at   | 0.95942 | leucine-rich repeats and calponin homology (CH) domain containing 4 Lrch4                         | Lrch4         |
| 1454391_at   | 0.93580 | RIKEN cDNA 6030442K20 gene                                                                        | 6030442K20Rik |
| 1454392_at   | 1.07526 | RIKEN cDNA 9230112J17 gene                                                                        | 9230112J17Rik |
| 1454393_at   | 1.12154 | RIKEN cDNA 2310047C04 gene                                                                        | 2310047C04Rik |
| 1454394_at   | 1.26210 | RIKEN cDNA 4932432N04 gene                                                                        | 4932432N04Rik |
| 1454395_at   | 0.95903 | RIKEN cDNA 4632404M16 gene                                                                        | 4632404M16Rik |
| 1454396_at   | 0.94623 | RIKEN cDNA 4632409D06 gene                                                                        | 4632409D06Rik |
| 1454397_at   | 1.11881 | RIKEN cDNA 4632418H02 gene                                                                        | 4632418H02Rik |
| 1454398_at   | 0.99567 | ---                                                                                               | ---           |
| 1454399_at   | 1.02462 | RIKEN cDNA 2010003H20 gene                                                                        | 2010003H20Rik |
| 1454400_at   | 1.01905 | RIKEN cDNA 4632432E15 gene                                                                        | 4632432E15Rik |
| 1454401_at   | 0.93415 | RIKEN cDNA 5730488B01 gene                                                                        | 5730488B01Rik |
| 1454402_at   | 0.88608 | RIKEN cDNA 3110048L19 gene                                                                        | 3110048L19Rik |
| 1454403_at   | 0.91558 | RIKEN cDNA 4930466I24 gene                                                                        | 4930466I24Rik |
| 1454404_at   | 1.09614 | RIKEN cDNA 2610011E03 gene                                                                        | 2610011E03Rik |
| 1454405_at   | 0.96271 | RIKEN cDNA 4930453J04 gene                                                                        | 4930453J04Rik |
| 1454406_at   | 0.96213 | RIKEN cDNA 4930453J04 gene                                                                        | 4930453J04Rik |
| 1454407_at   | 0.91935 | RIKEN cDNA 4930435N07 gene                                                                        | 4930435N07Rik |
| 1454408_at   | 0.94981 | RIKEN cDNA 4930544L18 gene                                                                        | 4930544L18Rik |
| 1454409_at   | 0.94053 | RIKEN cDNA 4833408G04 gene                                                                        | 4833408G04Rik |
| 1454410_at   | 0.89213 | RIKEN cDNA 9130414P19 gene                                                                        | 9130414P19Rik |

|            |                                                           |               |       |
|------------|-----------------------------------------------------------|---------------|-------|
| 1454411_at | 0.96011 RIKEN cDNA 4933406F09 gene                        | 4933406F09Rik |       |
| 1454412_at | 1.06173 RIKEN cDNA 2810410P21 gene                        | 2810410P21Rik |       |
| 1454413_at | 0.95666 RIKEN cDNA 4933424H11 gene                        | 4933424H11Rik |       |
| 1454414_at | 1.00861 BTB (POZ) domain containing 7                     | Btbd7         |       |
| 1454415_at | 0.98674 scaffold attachment factor B                      | Safb          |       |
| 1454416_at | 1.05219 RIKEN cDNA 5730575I04 gene                        | 5730575I04Rik |       |
| 1454417_at | 1.04009 RIKEN cDNA 4933408M05 gene                        | 4933408M05Rik |       |
| 1454418_at | 0.97843 RIKEN cDNA 5330421C15 gene                        | 5330421C15Rik |       |
| 1454419_at | 1.11657 RIKEN cDNA 4930537H20 gene                        | 4930537H20Rik |       |
| 1454420_at | 0.89998 RIKEN cDNA 5730420F10 gene                        | 5730420F10Rik |       |
| 1454421_at | 0.99115 RIKEN cDNA 4930423D22 gene                        | 4930423D22Rik |       |
| 1454422_at | 1.08073 RIKEN cDNA 4930456J16 gene                        | 4930456J16Rik |       |
| 1454423_at | 0.98649 RIKEN cDNA 4930538D17 gene                        | 4930538D17Rik |       |
| 1454424_at | 0.98815 RIKEN cDNA 2610040L17 gene                        | 2610040L17Rik |       |
| 1454425_at | 0.98004 RIKEN cDNA 5830495A06 gene                        | 5830495A06Rik |       |
| 1454426_at | 1.03558 RIKEN cDNA 4930519E07 gene                        | 4930519E07Rik |       |
| 1454427_at | 0.92962 --- ---                                           |               |       |
| 1454428_at | 0.99952 RIKEN cDNA 4930467D19 gene                        | 4930467D19Rik |       |
| 1454429_at | 1.05565 RIKEN cDNA 5830462O15 gene                        | 5830462O15Rik |       |
| 1454430_at | 0.93603 phosphodiesterase 11A                             | Pde11a        |       |
| 1454431_at | 1.07659 RIKEN cDNA 9030613N10 gene                        | 9030613N10Rik |       |
| 1454432_at | 0.91857 RIKEN cDNA 4933423N03 gene                        | 4933423N03Rik |       |
| 1454433_at | 0.88682 RIKEN cDNA 6330526H18 gene                        | 6330526H18Rik |       |
| 1454434_at | 0.91966 RIKEN cDNA 9030607J07 gene                        | 9030607J07Rik |       |
| 1454435_at | 0.85094 RIKEN cDNA 5530400N10 gene                        | 5530400N10Rik |       |
| 1454436_at | 0.88897 RIKEN cDNA 4921506L19 gene                        | 4921506L19Rik |       |
| 1454437_at | 0.98470 --- ---                                           |               |       |
| 1454438_at | 1.09211 "RAB27A, member RAS oncogene family"              | Rab27a        |       |
| 1454439_at | 1.03973 RIKEN cDNA 4833419G08 gene                        | 4833419G08Rik |       |
| 1454440_at | 0.99116 RIKEN cDNA 4930421C12 gene                        | 4930421C12Rik |       |
| 1454441_at | 0.81431 "BCL2/adenovirus E1B interacting protein 1, NIP2" |               | Bnip2 |
| 1454442_at | 0.92774 "BCL2/adenovirus E1B interacting protein 1, NIP2" |               | Bnip2 |
| 1454443_at | 0.89314 RIKEN cDNA 4833411I10 gene                        | 4833411I10Rik |       |
| 1454444_at | 0.99442 RIKEN cDNA 5730406E14 gene                        | 5730406E14Rik |       |
| 1454445_at | 1.08296 RIKEN cDNA 5430430K15 gene                        | 5430430K15Rik |       |
| 1454446_at | 0.87216 RIKEN cDNA 4930564B12 gene                        | 4930564B12Rik |       |
| 1454447_at | 1.01417 RIKEN cDNA 5830434F19 gene                        | 5830434F19Rik |       |
| 1454448_at | 0.90048 RIKEN cDNA 2900018E21 gene                        | 2900018E21Rik |       |
| 1454449_at | 1.30844 Rab9 effector protein with kelch motifs           | Rabepk        |       |
| 1454450_at | 1.02690 RIKEN cDNA 4930572C08 gene                        | 4930572C08Rik |       |
| 1454451_at | 1.04559 RIKEN cDNA 5330430B06 gene                        | 5330430B06Rik |       |
| 1454452_at | 1.06935 RIKEN cDNA 4933428L01 gene                        | 4933428L01Rik |       |
| 1454453_at | 1.01840 RIKEN cDNA 2610011I18 gene                        | 2610011I18Rik |       |

|               |                                                    |                               |
|---------------|----------------------------------------------------|-------------------------------|
| 1454454_at    | 0.82008 --- ---                                    |                               |
| 1454455_at    | 1.02479 RIKEN cDNA 6530413G14 gene                 | 6530413G14Rik                 |
| 1454456_at    | 0.91920 RIKEN cDNA 6530413G14 gene                 | 6530413G14Rik                 |
| 1454457_at    | 0.96002 RIKEN cDNA 4930439G18 gene                 | 4930439G18Rik                 |
| 1454458_at    | 0.99313 RIKEN cDNA 6230426I18 gene                 | 6230426I18Rik                 |
| 1454459_at    | 0.95098 RIKEN cDNA 4933423L19 gene                 | 4933423L19Rik                 |
| 1454460_at    | 0.93995 RIKEN cDNA 5730433N10 gene                 | 5730433N10Rik                 |
| 1454461_at    | 1.03093 RIKEN cDNA 5830433M15 gene                 | 5830433M15Rik                 |
| 1454462_at    | 0.96369 RIKEN cDNA 6430605C03 gene                 | 6430605C03Rik                 |
| 1454463_at    | 0.91347 RIKEN cDNA 5430402O13 gene                 | 5430402O13Rik                 |
| 1454464_at    | 0.96031 RIKEN cDNA 2700078F05 gene                 | 2700078F05Rik                 |
| 1454465_at    | 0.78341 RIKEN cDNA 5830435N06 gene                 | 5830435N06Rik                 |
| 1454466_at    | 1.02112 RIKEN cDNA 4933407I18 gene                 | 4933407I18Rik                 |
| 1454467_at    | 0.93063 similar to Vinculin CG3299-PA ///          | similar to Vinculin CG3299-PA |
| LOC668894 /// | LOC671420                                          |                               |
| 1454468_at    | 0.87732 RIKEN cDNA 5430434N17 gene                 | 5430434N17Rik                 |
| 1454469_at    | 1.07162 RIKEN cDNA 5430434N17 gene                 | 5430434N17Rik                 |
| 1454470_at    | 0.87433 RIKEN cDNA 4930404F17 gene                 | 4930404F17Rik                 |
| 1454471_at    | 0.99763 RIKEN cDNA 3110062G12 gene                 | 3110062G12Rik                 |
| 1454472_at    | 1.10143 RIKEN cDNA 2900092N22 gene                 | 2900092N22Rik                 |
| 1454473_at    | 0.92770 RIKEN cDNA 4933433M23 gene                 | 4933433M23Rik                 |
| 1454474_at    | 1.02485 RIKEN cDNA 4933433M23 gene                 | 4933433M23Rik                 |
| 1454475_at    | 0.91447 RIKEN cDNA 4921524M04 gene                 | 4921524M04Rik                 |
| 1454476_at    | 1.03322 RIKEN cDNA 4933428L12 gene                 | 4933428L12Rik                 |
| 1454477_at    | 0.88433 RIKEN cDNA 5530401A10 gene                 | 5530401A10Rik                 |
| 1454478_at    | 1.06431 RIKEN cDNA 3100002H20 gene                 | 3100002H20Rik                 |
| 1454479_at    | 0.91808 --- ---                                    |                               |
| 1454480_at    | 0.98098 RIKEN cDNA 4933439N06 gene                 | 4933439N06Rik                 |
| 1454481_at    | 0.99132 macrophage migration inhibitory factor Mif |                               |
| 1454482_at    | 0.94728 RIKEN cDNA 5830474E16 gene                 | 5830474E16Rik                 |
| 1454483_at    | 1.06073 RIKEN cDNA 6330590E21 gene                 | 6330590E21Rik                 |
| 1454484_at    | 0.87811 RIKEN cDNA 4933424L07 gene                 | 4933424L07Rik                 |
| 1454485_at    | 0.95341 RIKEN cDNA 4930456G14 gene                 | 4930456G14Rik                 |
| 1454486_at    | 0.97818 RIKEN cDNA 9530002O20 gene                 | 9530002O20Rik                 |
| 1454487_at    | 1.17858 RIKEN cDNA 5830490A04 gene                 | 5830490A04Rik                 |
| 1454488_at    | 1.00829 RIKEN cDNA 4930534I15 gene                 | 4930534I15Rik                 |
| 1454489_at    | 0.94222 RIKEN cDNA 4930513L20 gene                 | 4930513L20Rik                 |
| 1454490_at    | 1.13072 RIKEN cDNA 4930423C22 gene                 | 4930423C22Rik                 |
| 1454491_at    | 0.90557 RIKEN cDNA 2900040J22 gene                 | 2900040J22Rik                 |
| 1454492_at    | 1.13348 RIKEN cDNA 8430418B16 gene                 | 8430418B16Rik                 |
| 1454493_at    | 0.97585 RIKEN cDNA 5033425B01 gene                 | 5033425B01Rik                 |
| 1454494_at    | 1.10281 RIKEN cDNA 5830448L01 gene                 | 5830448L01Rik                 |
| 1454495_at    | 1.05284 RIKEN cDNA 4930432H08 gene                 | 4930432H08Rik                 |

|            |                                                     |               |
|------------|-----------------------------------------------------|---------------|
| 1454496_at | 0.86502 RIKEN cDNA 5031415H12 gene                  | 5031415H12Rik |
| 1454497_at | 1.11944 RIKEN cDNA 5230401M06 gene                  | 5230401M06Rik |
| 1454498_at | 1.04761 RIKEN cDNA 9230118N17 gene                  | 9230118N17Rik |
| 1454499_at | 0.98317 RIKEN cDNA 4933431C10 gene                  | 4933431C10Rik |
| 1454500_at | 0.95991 RIKEN cDNA 6330419E04 gene                  | 6330419E04Rik |
| 1454501_at | 0.91301 RIKEN cDNA 6330419E04 gene                  | 6330419E04Rik |
| 1454502_at | 0.96762 RIKEN cDNA 2900022B07 gene                  | 2900022B07Rik |
| 1454503_at | 0.86443 RIKEN cDNA 9030201C23 gene                  | 9030201C23Rik |
| 1454504_at | 0.89509 Kv channel-interacting protein 1            | Kcnip1        |
| 1454505_at | 1.06325 RIKEN cDNA 6330562C20 gene                  | 6330562C20Rik |
| 1454506_at | 0.94542 --- ---                                     |               |
| 1454507_at | 1.05134 RIKEN cDNA 8430432A02 gene                  | 8430432A02Rik |
| 1454508_at | 1.02475 RIKEN cDNA 4930485E13 gene                  | 4930485E13Rik |
| 1454509_at | 0.91505 RIKEN cDNA 4930444E06 gene                  | 4930444E06Rik |
| 1454510_at | 0.85694 RIKEN cDNA 2900034C19 gene                  | 2900034C19Rik |
| 1454511_at | 0.99032 RIKEN cDNA 9430018C23 gene                  | 9430018C23Rik |
| 1454512_at | 1.10913 RIKEN cDNA 9430018C23 gene                  | 9430018C23Rik |
| 1454513_at | 1.00727 RIKEN cDNA 9430031J08 gene                  | 9430031J08Rik |
| 1454514_at | 0.98435 RIKEN cDNA 5730415C11 gene                  | 5730415C11Rik |
| 1454515_at | 0.89126 RIKEN cDNA 5430425E15 gene                  | 5430425E15Rik |
| 1454516_at | 0.98642 RIKEN cDNA 4930424E08 gene                  | 4930424E08Rik |
| 1454517_at | 1.08416 RIKEN cDNA C030011I16 gene                  | C030011I16Rik |
| 1454518_at | 1.12937 RIKEN cDNA 4930429L21 gene                  | 4930429L21Rik |
| 1454519_at | 0.88238 RIKEN cDNA 4930429L21 gene                  | 4930429L21Rik |
| 1454520_at | 0.96729 RIKEN cDNA 5830415B17 gene                  | 5830415B17Rik |
| 1454521_at | 0.99981 RIKEN cDNA 2810421E14 gene                  | 2810421E14Rik |
| 1454522_at | 0.97396 RIKEN cDNA 4930573G07 gene                  | 4930573G07Rik |
| 1454523_at | 0.98860 RIKEN cDNA C530007A02 gene                  | C530007A02Rik |
| 1454524_at | 1.04859 RIKEN cDNA 2310075M01 gene                  | 2310075M01Rik |
| 1454525_at | 0.94905 selenoprotein 15-Sep                        |               |
| 1454526_at | 1.06179 RIKEN cDNA 9430014F16 gene                  | 9430014F16Rik |
| 1454527_at | 1.03796 RIKEN cDNA 8430437B07 gene                  | 8430437B07Rik |
| 1454528_at | 1.01980 RIKEN cDNA A930011E06 gene                  | A930011E06Rik |
| 1454529_at | 1.01539 RIKEN cDNA 4930518C04 gene                  | 4930518C04Rik |
| 1454530_at | 0.81734 --- ---                                     |               |
| 1454531_at | 0.92653 RIKEN cDNA C030043A13 gene                  | C030043A13Rik |
| 1454532_at | 1.06895 RIKEN cDNA C030043A13 gene                  | C030043A13Rik |
| 1454533_at | 0.97507 RIKEN cDNA 9430085L16 gene                  | 9430085L16Rik |
| 1454534_at | 1.02562 "inhibitor of growth family, member 1" Ing1 |               |
| 1454535_at | 0.98597 RIKEN cDNA A430110A21 gene                  | A430110A21Rik |
| 1454536_at | 0.94126 RIKEN cDNA 4933401B01 gene                  | 4933401B01Rik |
| 1454537_at | 0.91448 RIKEN cDNA 4930556A12 gene                  | 4930556A12Rik |
| 1454538_at | 0.90866 RIKEN cDNA D730048A03 gene                  | D730048A03Rik |

|            |         |                                                                                                                                       |           |                                                            |
|------------|---------|---------------------------------------------------------------------------------------------------------------------------------------|-----------|------------------------------------------------------------|
| 1454539_at | 0.99382 | RIKEN cDNA 4933417G07                                                                                                                 | gene      | 4933417G07Rik                                              |
| 1454540_at | 0.94887 | RIKEN cDNA 4930504E06                                                                                                                 | gene      | 4930504E06Rik                                              |
| 1454541_at | 0.93948 | RIKEN cDNA 4921522E08                                                                                                                 | gene      | 4921522E08Rik                                              |
| 1454542_at | 0.96391 | RIKEN cDNA 9330179C17                                                                                                                 | gene      | 9330179C17Rik                                              |
| 1454543_at | 0.98333 | serine/threonine kinase 40                                                                                                            | Stk40     |                                                            |
| 1454544_at | 0.97971 | RIKEN cDNA 9530078B04                                                                                                                 | gene      | 9530078B04Rik                                              |
| 1454545_at | 1.05097 | RIKEN cDNA 4933403L11                                                                                                                 | gene      | 4933403L11Rik                                              |
| 1454546_at | 1.00071 | RIKEN cDNA 4933403L11                                                                                                                 | gene      | 4933403L11Rik                                              |
| 1454547_at | 0.98968 | RIKEN cDNA 2310045N14                                                                                                                 | gene      | 2310045N14Rik                                              |
| 1454548_at | 0.94359 | RIKEN cDNA 1700039M15                                                                                                                 | gene      | 1700039M15Rik                                              |
| 1454549_at | 0.91606 | RIKEN cDNA 2900005I04                                                                                                                 | gene      | 2900005I04Rik                                              |
| 1454550_at | 0.96859 | RIKEN cDNA 4930478M09                                                                                                                 | gene      | 4930478M09Rik                                              |
| 1454551_at | 1.17077 | RIKEN cDNA 9530034D02                                                                                                                 | gene      | 9530034D02Rik                                              |
| 1454552_at | 0.94257 | RIKEN cDNA 4930456K20                                                                                                                 | gene      | 4930456K20Rik                                              |
| 1454553_at | 1.10932 | RIKEN cDNA 4930509E22                                                                                                                 | gene      | 4930509E22Rik                                              |
| 1454554_at | 1.02840 | RIKEN cDNA 9330159N22                                                                                                                 | gene      | 9330159N22Rik                                              |
| 1454555_at | 0.99370 | RIKEN cDNA 4930472F24                                                                                                                 | gene      | 4930472F24Rik                                              |
| 1454556_at | 1.05134 | RIKEN cDNA 2700057C20                                                                                                                 | gene      | 2700057C20Rik                                              |
| 1454557_at | 1.10071 | RIKEN cDNA 6720454L07                                                                                                                 | gene      | 6720454L07Rik                                              |
| 1454558_at | 1.06222 | RIKEN cDNA 5430416B10                                                                                                                 | gene      | 5430416B10Rik                                              |
| 1454559_at | 1.02003 | RIKEN cDNA 5430437A18                                                                                                                 | gene      | 5430437A18Rik                                              |
| 1454560_at | 1.02768 | RIKEN cDNA 4930519N06                                                                                                                 | gene      | 4930519N06Rik                                              |
| 1454561_at | 1.00997 | RIKEN cDNA 9430087B13                                                                                                                 | gene      | 9430087B13Rik                                              |
| 1454562_at | 1.03276 | "Adult male testis cDNA, RIKEN full-length enriched library, clone:4930590N04 product:hypothetical protein, full insert sequence" --- |           |                                                            |
| 1454563_at | 1.11212 | RIKEN cDNA 4930573C08                                                                                                                 | gene      | 4930573C08Rik                                              |
| 1454564_at | 0.91242 | RIKEN cDNA 4933401J01                                                                                                                 | gene      | 4933401J01Rik                                              |
| 1454565_at | 0.93929 | RIKEN cDNA C030046M01                                                                                                                 | gene      | C030046M01Rik                                              |
| 1454566_at | 0.95080 | RIKEN cDNA 4933439C20                                                                                                                 | gene ///  | RIKEN cDNA D030013I16 gene 4933439C20Rik /// D030013I16Rik |
| 1454567_at | 1.08358 | RIKEN cDNA 4933404K13                                                                                                                 | gene      | 4933404K13Rik                                              |
| 1454568_at | 1.08694 | RIKEN cDNA 6030460B20                                                                                                                 | gene      | 6030460B20Rik                                              |
| 1454569_at | 1.03516 | RIKEN cDNA 4930480K02                                                                                                                 | gene      | 4930480K02Rik                                              |
| 1454570_at | 1.02459 | RIKEN cDNA 5830432F11                                                                                                                 | gene      | 5830432F11Rik                                              |
| 1454571_at | 1.08631 | RIKEN cDNA A930036A04                                                                                                                 | gene      | A930036A04Rik                                              |
| 1454572_at | 0.87866 | RIKEN cDNA 2810414N06                                                                                                                 | gene      | 2810414N06Rik                                              |
| 1454573_at | 0.88206 | RIKEN cDNA 4933412L11                                                                                                                 | gene      | 4933412L11Rik                                              |
| 1454574_at | 1.01795 | RIKEN cDNA C430049A07                                                                                                                 | gene      | C430049A07Rik                                              |
| 1454575_at | 0.98722 | RIKEN cDNA 5730422E09                                                                                                                 | gene      | 5730422E09Rik                                              |
| 1454576_at | 0.93832 | RIKEN cDNA A230102O21                                                                                                                 | gene      | A230102O21Rik                                              |
| 1454577_at | 1.10248 | similar to cell division cycle 20 homolog                                                                                             | LOC238896 |                                                            |
| 1454578_at | 1.02191 | RIKEN cDNA 6030458A19                                                                                                                 | gene      | 6030458A19Rik                                              |
| 1454579_at | 0.90785 | RIKEN cDNA 4930474A20                                                                                                                 | gene      | 4930474A20Rik                                              |

|              |         |                                                                                                                                                                                                                                                                                                              |      |               |
|--------------|---------|--------------------------------------------------------------------------------------------------------------------------------------------------------------------------------------------------------------------------------------------------------------------------------------------------------------|------|---------------|
| 1454580_at   | 1.03456 | RIKEN cDNA 5430427N15                                                                                                                                                                                                                                                                                        | gene | 5430427N15Rik |
| 1454581_at   | 1.02892 | RIKEN cDNA 5330425B07                                                                                                                                                                                                                                                                                        | gene | 5330425B07Rik |
| 1454582_at   | 0.93355 | RIKEN cDNA D530037P16                                                                                                                                                                                                                                                                                        | gene | D530037P16Rik |
| 1454583_at   | 0.93878 | RIKEN cDNA 2810034D10                                                                                                                                                                                                                                                                                        | gene | 2810034D10Rik |
| 1454584_at   | 1.10364 | RIKEN cDNA 2810034D10                                                                                                                                                                                                                                                                                        | gene | 2810034D10Rik |
| 1454585_at   | 1.09292 | RIKEN cDNA 1110065P19                                                                                                                                                                                                                                                                                        | gene | 1110065P19Rik |
| 1454586_at   | 1.04503 | RIKEN cDNA 1500002K03                                                                                                                                                                                                                                                                                        | gene | 1500002K03Rik |
| 1454587_at   | 0.88796 | RIKEN cDNA 9330199C07                                                                                                                                                                                                                                                                                        | gene | 9330199C07Rik |
| 1454588_at   | 0.83088 | RIKEN cDNA 9430006E15                                                                                                                                                                                                                                                                                        | gene | 9430006E15Rik |
| 1454589_at   | 0.85159 | RIKEN cDNA 9430006E15                                                                                                                                                                                                                                                                                        | gene | 9430006E15Rik |
| 1454590_at   | 1.06344 | RIKEN cDNA A930018O16                                                                                                                                                                                                                                                                                        | gene | A930018O16Rik |
| 1454591_at   | 0.94153 | microtubule associated serine/threonine kinase family member 4                                                                                                                                                                                                                                               |      | Mast4         |
| 1454592_at   | 1.58845 | RIKEN cDNA 9430012M22                                                                                                                                                                                                                                                                                        | gene | 9430012M22Rik |
| 1454593_at   | 0.91221 | "FYVE, RhoGEF and PH domain containing 3"                                                                                                                                                                                                                                                                    |      | Fgd3          |
| 1454594_at   | 0.98883 | RIKEN cDNA 2900078I11                                                                                                                                                                                                                                                                                        | gene | 2900078I11Rik |
| 1454595_at   | 0.93443 | RIKEN cDNA 4930451E06                                                                                                                                                                                                                                                                                        | gene | 4930451E06Rik |
| 1454596_at   | 0.89839 | RIKEN cDNA A730089K16                                                                                                                                                                                                                                                                                        | gene | A730089K16Rik |
| 1454597_at   | 0.97406 | RIKEN cDNA 4930423O20                                                                                                                                                                                                                                                                                        | gene | 4930423O20Rik |
| 1454598_at   | 0.88824 | RIKEN cDNA 4930425F17                                                                                                                                                                                                                                                                                        | gene | 4930425F17Rik |
| 1454599_at   | 0.96518 | RIKEN cDNA 4930425F17                                                                                                                                                                                                                                                                                        | gene | 4930425F17Rik |
| 1454600_at   | 1.00937 | RIKEN cDNA 9530086P17                                                                                                                                                                                                                                                                                        | gene | 9530086P17Rik |
| 1454601_at   | 1.01644 | RIKEN cDNA 8030497O21                                                                                                                                                                                                                                                                                        | gene | 8030497O21Rik |
| 1454602_s_at | 1.01457 | "CCR4-NOT transcription complex, subunit 2"                                                                                                                                                                                                                                                                  |      | Cnot2         |
| 1454603_a_at | 1.01946 | "CCR4-NOT transcription complex, subunit 2"                                                                                                                                                                                                                                                                  |      | Cnot2         |
| 1454604_s_at | 0.79969 | tetraspanin 12                                                                                                                                                                                                                                                                                               |      | Tspan12       |
| 1454605_a_at | 1.04570 | phosphatidylinositol 4-kinase type 2 alpha                                                                                                                                                                                                                                                                   |      | Pi4k2a        |
| 1454606_at   | 1.26604 | RIKEN cDNA 4933426M11                                                                                                                                                                                                                                                                                        | gene | 4933426M11Rik |
| 1454607_s_at | 1.06657 | phosphoserine aminotransferase 1                                                                                                                                                                                                                                                                             |      | Psat1         |
| 1454608_x_at | 0.44837 | transthyretin                                                                                                                                                                                                                                                                                                |      | Ttr           |
| 1454609_x_at | 0.88111 | RIKEN cDNA 6430527G18                                                                                                                                                                                                                                                                                        | gene | 6430527G18Rik |
| 1454610_at   | 0.94656 | septin 7                                                                                                                                                                                                                                                                                                     |      | 7-Sep         |
| 1454611_a_at | 1.00250 | calmodulin 1                                                                                                                                                                                                                                                                                                 |      | Calm1         |
| 1454612_at   | 0.98525 | ring finger and KH domain containing 2                                                                                                                                                                                                                                                                       |      | Rkhd2         |
| 1454613_at   | 0.33584 | dihydropyrimidinase-like 3                                                                                                                                                                                                                                                                                   |      | Dpysl3        |
| 1454614_at   | 0.87785 | RIKEN cDNA 1810013D10                                                                                                                                                                                                                                                                                        | gene | 1810013D10Rik |
| 1454615_x_at | 0.90014 | signal recognition particle 14                                                                                                                                                                                                                                                                               |      | Srp14         |
| 1454616_at   | 0.87136 | RIKEN cDNA 5730410I19                                                                                                                                                                                                                                                                                        | gene | 5730410I19Rik |
| 1454617_at   | 0.59081 | arrestin domain containing 3                                                                                                                                                                                                                                                                                 |      | Arrdc3        |
| 1454618_at   | 0.91908 | ---                                                                                                                                                                                                                                                                                                          |      | ---           |
| 1454619_at   | 0.96840 | transmembrane protein 153                                                                                                                                                                                                                                                                                    |      | Tmem153       |
| 1454620_x_at | 1.08719 | ribosomal protein S6 /// similar to 40S ribosomal protein S6 |      |               |

protein S6 /// similar to 40S ribosomal protein S6  
 Rps6 /// LOC434404 /// LOC545640 /// LOC626259 /// LOC629575 /// LOC638497 /// LOC639124 /// LOC639593 /// LOC639750 /// LOC666577 /// LOC667717 /// LOC667739 /// LOC667922 /// LOC671306 /// LOC671432 /// LOC672192 /// LOC672620 /// LOC676999  
 1454621\_at 0.85203 RIKEN cDNA 5730472N09 gene 5730472N09Rik  
 1454622\_at 0.98610 "solute carrier family 38, member 5" Slc38a5  
 1454623\_at 1.12336 "carboxypeptidase A2, pancreatic" Cpa2  
 1454624\_at 0.86702 DENN/MADD domain containing 2A Dennd2a  
 1454625\_at 1.00173 PHD finger protein 6 Phf6  
 1454626\_at 1.02218 "clathrin, heavy polypeptide (Hc)" Cltc  
 1454627\_a\_at 1.07375 ribosomal protein L29 /// similar to 60S ribosomal protein L29 /// hypothetical protein LOC669999 /// similar to 60S ribosomal protein L29 /// similar to 60S ribosomal protein L29 Rpl29 /// LOC433350 /// LOC433941 /// LOC622707 /// LOC626772 /// LOC665032 /// LOC666642 /// LOC667466 /// LOC669999 /// LOC670334 /// LOC675846  
 1454628\_at 1.11053 RIKEN cDNA A930037G23 gene A930037G23Rik  
 1454629\_at 0.96331 RIKEN cDNA A930037G23 gene A930037G23Rik  
 1454630\_at 0.85554 sterile alpha motif domain containing 14 Samd14  
 1454631\_at 0.99219 RIKEN cDNA 6330549H03 gene 6330549H03Rik  
 1454632\_at 0.95794 RIKEN cDNA 6330442E10 gene 6330442E10Rik  
 1454633\_at 0.86077 ethanolamine kinase 1 Etnk1  
 1454634\_at 1.09764 fucokinase Fuk  
 1454635\_at 0.95514 F-box and leucine-rich repeat protein 3 Fbxl3  
 1454636\_at 0.94481 chromobox homolog 5 (Drosophila HP1a) Cbx5  
 1454637\_at 0.88041 kelch-like 8 (Drosophila) Klhl8  
 1454638\_a\_at 0.92525 phenylalanine hydroxylase Pah  
 1454639\_x\_at 1.52570 ribosomal protein L41 /// RIKEN cDNA 2210411K19 gene Rpl41 /// 2210411K19Rik  
 1454640\_at 0.88124 coiled-coil-helix-coiled-coil-helix domain containing 7 Chchd7  
 1454641\_at 0.93270 CGG triplet repeat binding protein 1 Cggbp1  
 1454642\_a\_at 1.04438 COMM domain containing 3 Commd3  
 1454643\_at 1.02932 ubiquitin associated protein 2-like Ubap2l  
 1454644\_at 1.12392 RIKEN cDNA 6330569M22 gene 6330569M22Rik  
 1454645\_at 0.90352 "mahogunin, ring finger 1" Mgrn1  
 1454646\_at 0.77968 t-complex 11 (mouse) like 2 Tcp112  
 1454647\_at 0.83085 "acyl-Coenzyme A dehydrogenase family, member 11" Acad11  
 1454648\_s\_at 1.15155 "DNA segment, Chr 10, Wayne State University 102, expressed" D10Wsu102e



1454649\_at 1.02286 steroid 5 alpha-reductase 1 Srd5a1  
1454650\_at 0.91839 tripartite motif-containing 35 Trim35  
1454651\_x\_at 0.99679 myelin basic protein Mbp  
1454652\_at 0.92654 "zinc finger, RAN-binding domain containing 2" Zranb2  
1454653\_at 0.97486 copine family member IX Cpne9  
1454654\_at 0.88343 disrupted in renal carcinoma 2 (human) Dirc2  
1454655\_at 0.94633 "diacylglycerol kinase, delta" Dgkd  
1454656\_at 0.94270 spermatogenesis associated 13 Spata13  
1454657\_s\_at 0.99298 "MAK10 homolog, amino-acid N-acetyltransferase subunit, (S. cerevisiae)" Mak10  
1454658\_at 0.96652 ilvB (bacterial acetolactate synthase)-like Ilvbl  
1454659\_at 1.05938 dCMP deaminase Dctd  
1454660\_at 0.95817 RIKEN cDNA 1100001E04 gene 1100001E04Rik  
1454661\_at 0.94698 "ATP synthase, H+ transporting, mitochondrial F0 complex, subunit c (subunit 9), isoform 3" Atp5g3  
1454662\_at 0.91631 RIKEN cDNA A230106M15 gene A230106M15Rik  
1454663\_at 1.12592 eukaryotic translation initiation factor 5 Eif5  
1454664\_a\_at 1.08542 eukaryotic translation initiation factor 5 Eif5  
1454665\_at 0.83017 interferon regulatory factor 2 binding protein 2 /// similar to interferon regulatory factor 2 binding protein 2 Irf2bp2 /// LOC672960  
1454666\_at 0.91794 Kruppel-like factor 3 (basic) Klf3  
1454667\_at 1.09242 sorting nexin 8 Snx8  
1454668\_at 1.00412 "zinc finger, UBR1 type 1" Zubr1  
1454669\_at 1.04763 transmembrane protein 11 Tmem11  
1454670\_at 1.03868 arginine glutamic acid dipeptide (RE) repeats Rere  
1454671\_at 1.11499 insulin induced gene 1 Insig1  
1454672\_at 1.03365 --- ---  
1454673\_at 0.94984 --- ---  
1454674\_at 1.04080 fasciculation and elongation protein zeta 1 (zygin I) Fez1  
1454675\_at 0.73293 thyroid hormone receptor alpha Thra  
1454676\_s\_at 0.83289 toll-like receptor adaptor molecule 1 Ticam1  
1454677\_at 0.86155 tissue inhibitor of metalloproteinase 2 Timp2  
1454678\_s\_at 0.91704 RIKEN cDNA A130022J15 gene A130022J15Rik  
1454679\_at 1.06297 "DNA segment, Chr 8, ERATO Doi 457, expressed" D8Ertd457e  
1454680\_at 0.87542 "DNA segment, Chr 5, ERATO Doi 579, expressed" D5Ertd579e  
1454681\_at 1.16533 RNA binding motif protein 35A Rbm35a  
1454682\_at 1.01602 RIKEN cDNA A430005L14 gene A430005L14Rik  
1454683\_at 0.88456 "splicing factor, arginine/serine-rich 8" Sfrs8  
1454684\_at 0.94567 Bardet-Biedl syndrome 7 Bbs7  
1454685\_at 1.00516 G protein-coupled receptor 146 Gpr146  
1454686\_at 0.92472 RIKEN cDNA C330011F01 gene /// RIKEN cDNA 6430706D22 gene C330011F01Rik /// 6430706D22Rik  
1454687\_at 1.03651 leucine rich repeat and fibronectin type III domain containing 5 Lfn5

1454688\_x\_at 1.07113 transmembrane emp24-like trafficking protein 10 (yeast) /// similar to  
 transmembrane trafficking protein Tmed10 /// LOC634748  
 1454689\_at 0.95261 serine/arginine repetitive matrix 1 Srrm1  
 1454690\_at 0.98717 inhibitor of kappaB kinase gamma Ikbkg  
 1454691\_at 0.94773 neurexin I Nrnx1  
 1454692\_x\_at 0.93446 Heterogeneous nuclear ribonucleoprotein K Hnrpk  
 1454693\_at 0.87454 Histone deacetylase 4 Hdac4  
 1454694\_a\_at 1.05752 topoisomerase (DNA) II alpha Top2a  
 1454695\_at 0.97352 WD repeat domain 18 Wdr18  
 1454696\_at 1.02048 "guanine nucleotide binding protein, beta 1" Gnb1  
 1454697\_at 0.86251 translocation protein 1 Tloc1  
 1454698\_at 0.94678 protein tyrosine phosphatase-like A domain containing 1 Ptplad1  
 1454699\_at 0.73686 sestrin 1 Sesn1  
 1454700\_at 0.95336 leucine rich repeat and fibronectin type III domain containing 4 Lrnf4  
 1454701\_at 1.01946 RIKEN cDNA 4930503L19 gene 4930503L19Rik  
 1454702\_at 0.99293 RIKEN cDNA 4930503L19 gene 4930503L19Rik  
 1454703\_x\_at 1.14413 "small nucleolar RNA, C/D box 22" Snord22  
 1454704\_at 0.98709 "scavenger receptor class B, member 2" Scarb2  
 1454705\_at 1.00163 "DNA segment, Chr 15, ERATO Doi 621, expressed" D15Ertd621e  
 1454706\_at 1.11647 UV radiation resistance associated gene Uvrag  
 1454707\_at 0.90530 RIKEN cDNA 2310035C23 gene 2310035C23Rik  
 1454708\_at 1.08585 actin-binding LIM protein 1 Ablim1  
 1454709\_at 0.77531 transmembrane protein 64 Tmem64  
 1454710\_at 0.95879 "serine peptidase inhibitor, Kazal type 2" Spink2  
 1454711\_at 0.98115 triple functional domain (PTPRF interacting) Trio  
 1454712\_at 0.94519 mitochondrial carrier triple repeat 1 Mcart1  
 1454713\_s\_at 0.94492 histidine decarboxylase Hdc  
 1454714\_x\_at 1.13564 3-phosphoglycerate dehydrogenase /// similar to 3-phosphoglycerate  
 dehydrogenase /// similar to 3-phosphoglycerate dehydrogenase /// similar to 3-phosphoglycerate  
 dehydrogenase /// similar to 3-phosphoglycerate dehydrogenase Phgdh /// LOC668771 ///  
 LOC670155 /// LOC671972 /// LOC673015  
 1454715\_at 0.95415 RIKEN cDNA 0710005M24 gene 0710005M24Rik  
 1454716\_x\_at 0.99161 "cytochrome c oxidase, subunit Vb" Cox5b  
 1454717\_at 1.05827 Ankyrin repeat domain 27 (VPS9 domain) Ankrd27  
 1454718\_at 1.02021 N-acetylglucosamine-1-phosphodiester alpha-N-acetylglucosaminidase  
 Nagpa  
 1454719\_at 0.94901 rhomboid domain containing 3 Rhbdd3  
 1454720\_at 0.93394 "amyloid beta (A4) precursor protein-binding, family A, member 3 /// heparan  
 sulfate (glucosamine) 3-O-sulfotransferase 5" Apba3 /// Hs3st5  
 1454721\_at 0.97538 RIKEN cDNA 1110018G07 gene 1110018G07Rik  
 1454722\_at 0.85571 phosphatase and tensin homolog Pten  
 1454723\_at 1.01456 RIKEN cDNA 1110033M05 gene 1110033M05Rik  
 1454724\_x\_at 0.93026 RIKEN cDNA 5730446C15 gene 5730446C15Rik

1454725\_at 1.02712 transformer 2 alpha homolog (Drosophila) Tra2a  
1454726\_s\_at 0.82947 expressed sequence AW456874 AW456874  
1454727\_at 0.96960 expressed sequence AI173486 AI173486  
1454728\_s\_at 0.66441 "ATPase, aminophospholipid transporter (APLT), class I, type 8A, member 1" Atp8a1  
1454729\_at 1.04800 transmembrane protein 108 Tmem108  
1454730\_at 1.02096 RIKEN cDNA 4932414K18 gene 4932414K18Rik  
1454731\_at 1.12352 myosin X Myo10  
1454732\_at 1.00554 microtubule-associated protein 1S Mtap1s  
1454733\_at 0.94236 caspase recruitment domain 4 Card4  
1454734\_at 0.92217 --- ---  
1454735\_at 1.01940 outer dense fiber of sperm tails 2 Odf2  
1454736\_at 1.02615 ankyrin repeat domain 57 Ankrd57  
1454737\_at 1.26637 dual specificity phosphatase 9 Dusp9  
1454738\_x\_at 0.84547 peroxisomal biogenesis factor 6 Pex6  
1454739\_at 1.06508 cell division cycle 27 homolog (S. cerevisiae) Cdc27  
1454740\_at 1.09092 mindbomb homolog 1 (Drosophila) Mib1  
1454741\_s\_at 0.94819 transmembrane protein 164 Tmem164  
1454742\_at 1.02512 "RasGEF domain family, member 1B" Rasgef1b  
1454743\_at 0.99732 nucleoporin 205 Nup205  
1454744\_at 1.08561 RIKEN cDNA F630043A04 gene F630043A04Rik  
1454745\_at 1.06963 Rho GTPase activating protein 29 Arhgap29  
1454746\_at 0.97692 "pleckstrin homology domain containing, family M (with RUN domain) member 1" Plekhm1  
1454747\_a\_at 0.93739 kelch domain containing 3 Klhdc3  
1454748\_at 0.81184 nicotinate phosphoribosyltransferase domain containing 1 Naprt1  
1454749\_at 0.93839 pericentrin (kendrin) Pcnt  
1454750\_a\_at 1.04391 cDNA sequence BC057552 BC057552  
1454751\_at 1.04147 RIKEN cDNA G430022H21 gene G430022H21Rik  
1454752\_at 0.95297 similar to RNA binding motif protein 24 /// similar to RNA binding motif protein 24 /// similar to RNA binding motif protein 24 LOC380843 /// LOC638266 /// LOC666794  
1454753\_at 0.99471 arginyl aminopeptidase (aminopeptidase B)-like 1 Rnpepl1  
1454754\_a\_at 0.93310 angio-associated migratory protein Aamp  
1454755\_at 1.09990 "inositol 1,4,5-trisphosphate 3-kinase C" Itpkc  
1454756\_at 1.08541 leucine-rich repeats and calponin homology (CH) domain containing 3 Lrch3  
1454757\_s\_at 1.15711 "DNA segment, Chr 12, ERATO Doi 647, expressed" D12Ertd647e  
1454758\_a\_at 0.83600 "TSC22 domain family, member 1" Tsc22d1  
1454759\_at 0.93384 G protein-coupled receptor kinase-interactor 1 Git1  
1454760\_at 0.91134 HIV TAT specific factor 1 Htatsf1  
1454761\_at 0.91388 cDNA sequence BC005764 BC005764  
1454762\_at 0.89751 X Kell blood group precursor related X linked Xkrx  
1454763\_at 0.88523 ankyrin repeat domain 17 Ankrd17  
1454764\_s\_at 1.00123 "solute carrier family 38, member 1" Slc38a1

1454765\_at 0.94584 "general transcription factor IIIC, polypeptide 3" Gtf3c3  
1454766\_at 0.95306 RIKEN cDNA C730024G19 gene C730024G19Rik  
1454767\_at 0.86698 "DNA segment, Chr 2, Brigham & Women's Genetics 1423 expressed"  
D2Bwg1423e  
1454768\_at 1.00596 "potassium voltage-gated channel, subfamily F, member 1" Kcnf1  
1454769\_at 0.97555 TatD DNase domain containing 2 Tatdn2  
1454770\_at 0.90865 cholecystokinin B receptor Cckbr  
1454771\_at 0.96512 --- ---  
1454772\_at 1.07021 activating signal cointegrator 1 complex subunit 3-like 1 Ascc3l1  
1454773\_at 0.85162 retinoid X receptor alpha Rxra  
1454774\_at 1.00735 zinc finger protein 445 Zfp445  
1454775\_at 0.96649 histone deacetylase 10 Hdac10  
1454776\_at 0.97586 euchromatic histone methyltransferase 1 Ehmt1  
1454777\_at 0.97272 "solute carrier organic anion transporter family, member 2b1" Slco2b1  
1454778\_x\_at 0.94376 Cytotoxic granule-associated RNA binding protein 1 Tia1  
1454779\_s\_at 1.05420 RIKEN cDNA C230052I12 gene C230052I12Rik  
1454780\_at 1.01523 UDP-N-acetyl-alpha-D-galactosamine:polypeptide N-  
acetylgalactosaminyltransferase-like 4 Galntl4  
1454781\_x\_at 0.96929 COMM domain containing 9 Commd9  
1454782\_at 0.88317 brain-specific angiogenesis inhibitor 3 Bai3  
1454783\_at 1.18374 "interleukin 13 receptor, alpha 1" Il13ra1  
1454784\_at 1.00354 heparan sulfate (glucosamine) 3-O-sulfotransferase 2 Hs3st2  
1454785\_at 1.00579 dual specificity phosphatase 11 (RNA/RNP complex 1-interacting) Dusp11  
1454786\_at 0.88892 RIKEN cDNA 5031439G07 gene 5031439G07Rik  
1454787\_at 1.08817 "zinc finger, DHHC domain containing 9" Zdhhc9  
1454788\_at 0.91959 similar to ADP-ribosylation factor-like protein 7 LOC632433  
1454789\_x\_at 0.91643 PRP6 pre-mRNA splicing factor 6 homolog (yeast) Prpf6  
1454790\_at 0.94672 WD repeat domain 35 Wdr35  
1454791\_a\_at 1.01115 retinoblastoma binding protein 4 Rbbp4  
1454792\_s\_at 0.99021 selenophosphate synthetase 1 Sephs1  
1454793\_x\_at 0.90345 DEAD (Asp-Glu-Ala-Asp) box polypeptide 5 Ddx5  
1454794\_at 0.95035 spastin Spast  
1454795\_at 0.90620 Cobl-like 1 Cobll1  
1454796\_at 0.78905 "DNA segment, Chr 5, ERATO Doi 40, expressed" D5Ertd40e  
1454797\_at 1.20124 transmembrane protein 55b Tmem55b  
1454798\_at 1.08800 "Arginine-rich, mutated in early stage tumors" Armet  
1454799\_at 1.02142 RIKEN cDNA A230097K15 gene A230097K15Rik  
1454800\_at 0.82499 MORN repeat containing 2 Morn2  
1454801\_at 0.98049 ankyrin repeat domain 28 Ankrd28  
1454802\_x\_at 1.08182 ariadne homolog 2 (Drosophila) Arih2  
1454803\_a\_at 0.69504 histone deacetylase 11 Hdac11  
1454804\_at 1.00800 nuclear protein localization 4 homolog (S. cerevisiae) Nploc4  
1454805\_at 0.90848 Wilms' tumour 1-associating protein Wtap

1454806\_at 1.03519 "DNA segment, Chr 12, ERATO Doi 553, expressed" D12Erttd553e  
1454807\_a\_at 1.04679 sorting nexin 12 Snx12  
1454808\_at 0.96639 EF hand domain family A1 Efha1  
1454809\_at 0.92449 nuclear receptor coactivator 7 Ncoa7  
1454810\_s\_at 0.90260 expressed sequence AI315068 AI315068  
1454811\_a\_at 0.91894 serine incorporator 1 Serinc1  
1454812\_at 0.99913 RIKEN cDNA 5730601F06 gene 5730601F06Rik  
1454813\_at 0.92921 coiled-coil domain containing 72 Ccdc72  
1454814\_s\_at 0.91782 expressed sequence AU021838 AU021838  
1454815\_at 0.98966 SERTA domain containing 2 Sertad2  
1454816\_at 1.04585 retinitis pigmentosa 2 homolog (human) Rp2h  
1454817\_at 1.05418 "UTP18, small subunit (SSU) processome component, homolog (yeast)"  
Utp18  
1454818\_at 0.97975 glucocorticoid modulatory element binding protein 2 Gmeb2  
1454819\_at 0.94921 --- ---  
1454820\_at 0.99749 cDNA sequence BC037034 BC037034  
1454821\_at 0.95038 "beta-1,3-glucuronyltransferase 1 (glucuronosyltransferase P)" B3gat1  
1454822\_x\_at 0.43087 adenomatosis polyposis coli down-regulated 1 Apcdd1  
1454823\_at 1.02716 WD repeat domain 37 Wdr37  
1454824\_s\_at 0.58213 mitochondrial tumor suppressor 1 Mtus1  
1454825\_at 0.83930 RIKEN cDNA 1110014N23 gene 1110014N23Rik  
1454826\_at 1.02520 zinc finger and BTB domain containing 11 Zbtb11  
1454827\_at 1.00804 pogo transposable element with ZNF domain Pogz  
1454828\_at 0.98719 expressed sequence AI790205 AI790205  
1454829\_at 0.98814 RUN domain containing 1 Rundc1  
1454830\_at 1.05040 fibrillin 2 Fbn2  
1454831\_at 1.01637 forkhead box N2 Foxn2  
1454832\_at 0.73489 phosphatase and actin regulator 1 Phactr1  
1454833\_at 1.19915 ribosomal protein L35 Rpl35  
1454834\_at 1.07502 nuclear factor I/B Nfib  
1454835\_at 0.97055 EPM2A (laforin) interacting protein 1 Epm2aip1  
1454836\_at 0.84768 transmembrane protein 18 Tmem18  
1454837\_at 0.92710 "ceroid-lipofuscinosis, neuronal 6" Cln6  
1454838\_s\_at 1.14969 expressed sequence AW548124 AW548124  
1454839\_a\_at 1.02475 coiled-coil domain containing 84 Ccdc84  
1454840\_at 0.95729 methylcrotonoyl-Coenzyme A carboxylase 2 (beta) Mccc2  
1454841\_at 1.09671 RIKEN cDNA 4921511H13 gene 4921511H13Rik  
1454842\_a\_at 1.12445 "UDP-GalNAc:betaGlcNAc beta 1,3-galactosaminyltransferase, polypeptide  
2" B3galnt2  
1454843\_at 0.85189 phosphoribosyl pyrophosphate synthetase 2 Prps2  
1454844\_at 0.95908 melanin-concentrating hormone receptor 1 Mchr1  
1454845\_x\_at 1.00919 melanin-concentrating hormone receptor 1 Mchr1  
1454846\_at 1.00175 "UTP15, U3 small nucleolar ribonucleoprotein, homolog (yeast)" Utp15

1454847\_at 1.15778 lipoma HMGIC fusion partner-like 2 Lhfpl2  
1454848\_at 0.86060 "protein phosphatase 1, regulatory (inhibitor) subunit 12C" Ppp1r12c  
1454849\_x\_at 0.83062 clusterin Clu  
1454850\_at 0.98741 "TBC1 domain family, member 10c" Tbc1d10c  
1454851\_at 0.94965 "nuclear receptor subfamily 2, group C, member 2" Nr2c2  
1454852\_at 0.86615 trans-acting transcription factor 1 Sp1  
1454853\_s\_at 0.95693 expressed sequence AW146154 /// expressed sequence AI987944  
AW146154 /// AI987944  
1454854\_at 1.01545 organic solute transporter beta Ostb  
1454855\_at 0.79338 "membrane associated guanylate kinase, WW and PDZ domain containing 2"  
Magi2  
1454856\_x\_at 1.05911 ribosomal protein L35 Rpl35  
1454857\_at 0.89446 ring finger protein 122 Rnf122  
1454858\_x\_at 0.91221 methyltransferase like 7A Mettl7a  
1454859\_a\_at 1.01634 ribosomal protein L23 Rpl23  
1454860\_x\_at 0.90575 defender against cell death 1 Dad1  
1454861\_at 0.96521 taxilin alpha Txlna  
1454862\_at 1.06254 "pleckstrin homology-like domain, family B, member 2" Phldb2  
1454863\_at 0.96209 ankyrin repeat domain 11 Ankrd11  
1454864\_at 0.89714 zinc finger protein 592 Zfp592  
1454865\_at 1.03748 "solute carrier family 9 (sodium/hydrogen exchanger), member 8" Slc9a8  
1454866\_s\_at 1.02806 chloride intracellular channel 6 Clic6  
1454867\_at 0.55667 meningioma 1 Mn1  
1454868\_at 1.00453 "DNA segment, Chr 4, ERATO Doi 429, expressed" D4Ertd429e  
1454869\_at 0.89231 WD repeat domain 40B Wdr40b  
1454870\_x\_at 0.98851 G protein-coupled receptor 172B Gpr172b  
1454871\_at 0.91075 RNA binding motif protein 15B Rbm15b  
1454872\_at 0.92465 RIKEN cDNA B230308N11 gene B230308N11Rik  
1454873\_at 0.94073 RIKEN cDNA C130032F08 gene C130032F08Rik  
1454874\_at 0.97754 BTB (POZ) domain containing 7 Btbd7  
1454875\_a\_at 0.91944 retinoblastoma binding protein 4 Rbbp4  
1454876\_at 1.06207 "RAB23, member RAS oncogene family" Rab23  
1454877\_at 1.08827 SERTA domain containing 4 Sertad4  
1454878\_at 1.08156 RIKEN cDNA 2310047C04 gene 2310047C04Rik  
1454879\_s\_at 0.96152 RIKEN cDNA 1700052N19 gene 1700052N19Rik  
1454880\_s\_at 0.55572 Bcl2 modifying factor Bmf  
1454881\_s\_at 1.20166 uroplakin 3B Upk3b  
1454882\_at 0.86297 l(3)mbt-like 3 (Drosophila) L3mbtl3  
1454883\_at 0.96044 expressed sequence AI987692 AI987692  
1454884\_at 0.89197 BTB (POZ) domain containing 4 Btbd4  
1454885\_at 0.98354 cDNA sequence BC063263 BC063263  
1454886\_x\_at 1.02747 --- ---  
1454887\_at 1.01480 p21 (CDKN1A)-activated kinase 2 Pak2

1454888\_at 1.08168 prefoldin 4 Pfdn4  
1454889\_x\_at 0.81861 transmembrane and coiled coil domains 3 Tmcc3  
1454890\_at 0.92090 angiomotin Amot  
1454891\_at 1.13871 CDP-diacylglycerol synthase (phosphatidate cytidyltransferase) 2 Cds2  
1454892\_at 1.01738 "phosphatidylinositol transfer protein, beta" Pitpnb  
1454893\_at 1.03814 RIKEN cDNA 1110013L07 gene 1110013L07Rik  
1454894\_at 0.91509 SMAD specific E3 ubiquitin protein ligase 2 Smurf2  
1454895\_at 0.99449 "cytochrome b, ascorbate dependent 3" Cybasc3  
1454896\_at 0.95709 --- ---  
1454897\_at 0.99367 RIKEN cDNA 6330509M05 gene 6330509M05Rik  
1454898\_s\_at 0.81656 RIKEN cDNA 4833421E05 gene 4833421E05Rik  
1454899\_at 0.95356 LIM domain containing preferred translocation partner in lipoma Lpp  
1454900\_s\_at 0.94792 "pam, highwire, rpm 1" Phr1  
1454901\_at 0.74843 Hypothetical protein 6430570G24 6430570G24  
1454902\_at 0.83409 "protein kinase C, zeta" Prkcz  
1454903\_at 0.93383 "nerve growth factor receptor (TNFR superfamily, member 16)" Ngfr  
1454904\_at 1.27952 X-linked myotubular myopathy gene 1 Mtm1  
1454905\_at 1.02470 inhibitor of Bruton agammaglobulinemia tyrosine kinase Ibk  
1454906\_at 0.95909 "retinoic acid receptor, beta" Rarb  
1454907\_at 0.96665 --- ---  
1454908\_x\_at 0.85630 small EDRK-rich factor 1 Serf1  
1454909\_at 0.88581 "transforming, acidic coiled-coil containing protein 1" Tacc1  
1454910\_at 0.93691 "13 days embryo heart cDNA, RIKEN full-length enriched library, clone: D330008M10 product:hypothetical protein, full insert sequence" ---  
1454911\_at 1.10044 hypothetical protein LOC382106 LOC382106  
1454912\_at 1.03595 pre-B-cell leukemia transcription factor 4 Pbx4  
1454913\_at 1.05027 RIKEN cDNA 9930104L06 gene 9930104L06Rik  
1454914\_at 1.09117 RIKEN cDNA 2610101N10 gene 2610101N10Rik  
1454915\_at 1.12422 RAB3 GTPase activating protein subunit 2 Rab3gap2  
1454916\_s\_at 0.98797 ADP-ribosylation factor interacting protein 1 Arfip1  
1454917\_at 0.97364 expressed sequence AU045404 AU045404  
1454918\_at 1.04128 alkylglycerone phosphate synthase Agps  
1454919\_at 0.99057 Expressed sequence AU044698 AU044698  
1454920\_at 0.88874 "ubiquitin-like, containing PHD and RING finger domains 2" Uhrf2  
1454921\_at 1.03508 "gene model 561, (NCBI)" Gm561  
1454922\_at 1.07010 expressed sequence AI553587 AI553587  
1454923\_at 1.07748 expressed sequence AW214353 AW214353  
1454924\_at 1.07625 fucosyltransferase 10 Fut10  
1454925\_x\_at 1.03708 "malate dehydrogenase 1, NAD (soluble)" Mdh1  
1454926\_at 1.06309 RIKEN cDNA 4930544G21 gene 4930544G21Rik  
1454927\_at 0.91799 zinc finger protein 41 Zfp41  
1454928\_at 1.06322 scaffold attachment factor B Safb  
1454929\_s\_at 0.98330 scaffold attachment factor B Safb

1454930\_at 1.11818 leucine rich repeat containing 35 Lrrc35  
1454931\_at 0.94195 CREBBP/EP300 inhibitory protein 2 Cri2  
1454932\_at 1.00792 REST corepressor 1 Rcor1  
1454933\_at 0.94787 RIKEN cDNA 2610027C15 gene 2610027C15Rik  
1454934\_at 0.89979 protein phosphatase 1F (PP2C domain containing) Ppm1f  
1454935\_at 0.98814 RIKEN cDNA D930001I22 gene D930001I22Rik  
1454936\_at 0.94219 valyl-tRNA synthetase 2-like Vars2l  
1454937\_at 1.11710 RIKEN cDNA B630005N14 gene B630005N14Rik  
1454938\_at 1.00431 sorting nexin 13 Snx13  
1454939\_at 0.83751 PHD finger protein 20-like 1 Phf20l1  
1454940\_at 0.95384 "proteasome (prosome, macropain) subunit, alpha type 5 /// similar to Proteasome subunit alpha type 5 (Proteasome zeta chain) (Macropain zeta chain) (Multicatalytic endopeptidase complex zeta chain) /// similar to Proteasome subunit alpha type 5 (Proteasome zeta chain) (Macropain zeta chain) (Multicatalytic endopeptidase complex zeta chain) /// similar to Proteasome subunit alpha type 5 (Proteasome zeta chain) (Macropain zeta chain) (Multicatalytic endopeptidase complex zeta chain) /// similar to Proteasome subunit alpha type 5 (Proteasome zeta chain) (Macropain zeta chain) (Multicatalytic endopeptidase complex zeta chain)" Psma5 /// LOC545687 /// LOC666974 /// LOC671726 /// LOC676113  
1454941\_at 0.94913 N-myristoyltransferase 1 Nmt1  
1454942\_at 0.87252 niban protein Niban  
1454943\_a\_at 1.05113 PAX interacting (with transcription-activation domain) protein 1 Paxip1  
1454944\_at 1.00020 hypermethylated in cancer 2 Hic2  
1454945\_at 0.91414 leucine-rich repeats and IQ motif containing 2 Lrriq2  
1454946\_at 0.83734 myeloblastosis oncogene-like 2 Mybl2  
1454947\_a\_at 0.99282 ubiquitin-like domain containing CTD phosphatase 1 /// similar to ubiquitin-like domain containing CTD phosphatase 1 Ublcp1 /// LOC665689  
1454948\_at 1.13333 ubiquitin specific peptidase 7 Usp7  
1454949\_at 1.00935 Ubiquitin specific peptidase 7 Usp7  
1454950\_at 1.03872 RIKEN cDNA B930006L02 gene B930006L02Rik  
1454951\_at 0.79679 zinc finger protein 606 Zfp606  
1454952\_s\_at 1.07184 RIKEN cDNA B130055D15 gene B130055D15Rik  
1454953\_at 0.97066 ring finger protein 157 Rnf157  
1454954\_at 0.94102 WD repeat domain 61 Wdr61  
1454955\_at 1.14352 importin 7 Ipo7  
1454956\_at 1.10507 "ribosomal protein S6 kinase, polypeptide 1" Rps6kb1  
1454957\_at 1.16609 NIN1/RPN12 binding protein 1 homolog (S. cerevisiae) Nob1  
1454958\_at 0.99550 glycogen synthase kinase 3 beta Gsk3b  
1454959\_s\_at 0.57643 "guanine nucleotide binding protein, alpha inhibiting 1" Gnai1  
1454960\_at 1.02381 MAD homolog 3 (Drosophila) Smad3  
1454961\_at 1.08935 synaptojanin 1 Synj1  
1454962\_at 1.15502 spire homolog 1 (Drosophila) Spire1  
1454963\_at 0.99440 RIKEN cDNA E430028B21 gene E430028B21Rik  
1454964\_at 0.91199 cDNA sequence BC021395 BC021395



|              |         |                                                                                                                                                                                          |                       |
|--------------|---------|------------------------------------------------------------------------------------------------------------------------------------------------------------------------------------------|-----------------------|
| 1454965_at   | 0.98852 | RIKEN cDNA D430039N05 gene                                                                                                                                                               | D430039N05Rik         |
| 1454966_at   | 0.99488 | integrin alpha 8                                                                                                                                                                         | Itga8                 |
| 1454967_at   | 1.04089 | Transcribed locus                                                                                                                                                                        | ---                   |
| 1454968_at   | 0.93540 | RIKEN cDNA 1110034A24 gene                                                                                                                                                               | 1110034A24Rik         |
| 1454969_at   | 0.84277 | LY6/PLAUR domain containing 6                                                                                                                                                            | Lypd6                 |
| 1454970_at   | 1.00903 | ---                                                                                                                                                                                      | ---                   |
| 1454971_x_at | 0.82802 | "TSC22 domain family, member 1"                                                                                                                                                          | Tsc22d1               |
| 1454972_at   | 0.99683 | "ataxia, cerebellar, Cayman type homolog (human)"                                                                                                                                        | Atcay                 |
| 1454973_at   | 0.94105 | activating transcription factor 7 interacting protein                                                                                                                                    | Atf7ip                |
| 1454974_at   | 0.93729 | netrin 1                                                                                                                                                                                 | Ntn1                  |
| 1454975_at   | 1.19043 | proline/serine-rich coiled-coil 2                                                                                                                                                        | Psrc2                 |
| 1454976_at   | 0.87298 | "superoxide dismutase 2, mitochondrial"                                                                                                                                                  | Sod2                  |
| 1454977_at   | 0.86336 | expressed sequence AU020772                                                                                                                                                              | AU020772              |
| 1454978_at   | 0.84772 | tweety homolog 3 (Drosophila)                                                                                                                                                            | Ttyh3                 |
| 1454979_at   | 1.04222 | diaphanous homolog 1 (Drosophila) /// similar to Protein diaphanous homolog 1 (Diaphanous-related formin-1) (DRF1) (mDIA1) (p140mDIA) Diap1 /// LOC671545                                |                       |
| 1454980_at   | 0.98630 | RIKEN cDNA 4930402E16 gene                                                                                                                                                               | 4930402E16Rik         |
| 1454981_at   | 0.90578 | "DNA segment, Chr 4, ERATO Doi 22, expressed"                                                                                                                                            | D4Ertd22e             |
| 1454982_at   | 1.11859 | ADP-ribosylation factor guanine nucleotide-exchange factor 2 (brefeldin A-inhibited) /// similar to ADP-ribosylation factor guanine nucleotide-exchange factor 2 (brefeldin A-inhibited) | Arfgef2 /// LOC670796 |
| 1454983_at   | 1.08800 | expressed sequence AI465301                                                                                                                                                              | AI465301              |
| 1454984_at   | 0.80129 | expressed sequence AW061234                                                                                                                                                              | AW061234              |
| 1454985_at   | 0.98582 | RIKEN cDNA D030051N19 gene                                                                                                                                                               | D030051N19Rik         |
| 1454986_at   | 1.09137 | zinc finger protein 668                                                                                                                                                                  | Zfp668                |
| 1454987_a_at | 0.85136 | H2-K region expressed gene 6                                                                                                                                                             | H2-Ke6                |
| 1454988_s_at | 0.96492 | "RAB22A, member RAS oncogene family"                                                                                                                                                     | Rab22a                |
| 1454989_at   | 0.98246 | centrosome and spindle pole associated protein 1                                                                                                                                         | Cspp1                 |
| 1454990_at   | 0.90202 | AT rich interactive domain 2 (Arid-rfx like)                                                                                                                                             | Arid2                 |
| 1454991_at   | 1.00625 | "solute carrier family 7 (cationic amino acid transporter, y+ system), member 1"                                                                                                         | Slc7a1                |
| 1454992_at   | 1.11874 | "solute carrier family 7 (cationic amino acid transporter, y+ system), member 1"                                                                                                         | Slc7a1                |
| 1454993_a_at | 0.91106 | "splicing factor, arginine/serine-rich 3 (SRp20)"                                                                                                                                        | Sfrs3                 |
| 1454994_at   | 1.04907 | kelch-like 20 (Drosophila)                                                                                                                                                               | Klhl20                |
| 1454995_at   | 1.09788 | dimethylarginine dimethylaminohydrolase 1                                                                                                                                                | Ddah1                 |
| 1454996_at   | 1.03974 | hydroxysteroid dehydrogenase like 1                                                                                                                                                      | Hsd11                 |
| 1454997_at   | 0.86862 | methionine sulfoxide reductase B3                                                                                                                                                        | Msrb3                 |
| 1454998_at   | 1.03081 | RIKEN cDNA 1200011I18 gene                                                                                                                                                               | 1200011I18Rik         |
| 1454999_at   | 1.01033 | PHD finger protein 21B                                                                                                                                                                   | Phf21b                |
| 1455000_at   | 0.99532 | G protein-coupled receptor 68                                                                                                                                                            | Gpr68                 |
| 1455001_x_at | 1.05719 | ribosomal protein L13a                                                                                                                                                                   | Rpl13a                |
| 1455002_at   | 0.96000 | protein tyrosine phosphatase 4a1                                                                                                                                                         | Ptp4a1                |

1455003\_at 0.93148 "THAP domain containing, apoptosis associated protein 1" Thap1  
1455004\_at 0.88854 "DNA segment, Chr 2, Wayne State University 81, expressed" D2Wsu81e  
1455005\_s\_at 0.87258 "solute carrier family 5 (sodium/glucose cotransporter), member 2" Slc5a2  
1455006\_at 0.94396 RIKEN cDNA 2310016M24 gene 2310016M24Rik  
1455007\_s\_at 0.99809 glutamic pyruvate transaminase (alanine aminotransferase) 2 Gpt2  
1455008\_at 0.80729 "guanine nucleotide binding protein, alpha 12" Gna12  
1455009\_at 0.87694 carboxypeptidase D Cpd  
1455010\_at 1.05832 RIKEN cDNA 1500012F01 gene 1500012F01Rik  
1455011\_at 1.33819 StAR-related lipid transfer (START) domain containing 4 Stard4  
1455012\_s\_at 0.90038 tripartite motif protein 37 Trim37  
1455013\_at 0.96181 ariadne homolog 2 (Drosophila) Arih2  
1455014\_at 0.80950 expressed sequence AV009015 AV009015  
1455015\_at 0.88996 "TBC1 domain family, member 9" Tbc1d9  
1455016\_at 1.09922 PRP38 pre-mRNA processing factor 38 (yeast) domain containing B Prpf38b  
1455017\_a\_at 0.90993 "zinc finger, MYM-type 3" Zmym3  
1455018\_at 1.05456 lemur tyrosine kinase 2 Lmtk2  
1455019\_x\_at 0.84205 cytoskeleton-associated protein 4 Ckap4  
1455020\_at 0.91826 sorting nexin 25 Snx25  
1455021\_at 1.55425 "gamma-aminobutyric acid (GABA-B) receptor, 1" Gabbr1  
1455022\_at 1.13055 "striatin, calmodulin binding protein" Strn  
1455023\_at 1.00727 expressed sequence N28178 N28178  
1455024\_at 0.98552 tousled-like kinase 1 Tlk1  
1455025\_at 0.88246 progesterin and adipoQ receptor family member IX Paqr9  
1455026\_at 0.98228 "sno, strawberry notch homolog 1 (Drosophila)" Sbno1  
1455027\_at 0.93227 RUN and FYVE domain containing 3 Rufy3  
1455028\_at 1.07123 microtubule-associated protein tau Mapt  
1455029\_at 1.06333 kinesin family member 21A Kif21a  
1455030\_at 1.03581 "protein tyrosine phosphatase, receptor type, J" Ptpnj  
1455031\_at 0.95077 --- ---  
1455032\_at 1.12761 RIKEN cDNA 9630037P07 gene 9630037P07Rik  
1455033\_at 1.11332 RIKEN cDNA B430201A12 gene B430201A12Rik  
1455034\_at 0.74762 "Nuclear receptor subfamily 4, group A, member 2" Nr4a2  
1455035\_s\_at 1.22621 nucleolar protein 5A Nol5a  
1455036\_s\_at 0.93433 "NADH dehydrogenase (ubiquinone) 1, subcomplex unknown, 2 /// similar to  
NADH dehydrogenase (ubiquinone) 1, subcomplex unknown, 2" Ndufc2 /// LOC675851  
1455037\_at 0.86075 plexin A2 Plxna2  
1455038\_at 1.15573 similar to melanoma antigen LOC632764  
1455039\_a\_at 1.02823 "transcriptional regulator, SIN3B (yeast)" Sin3b  
1455040\_s\_at 0.90271 RIKEN cDNA 1110062M06 gene 1110062M06Rik  
1455041\_at 0.89928 "oocyte maturation, beta" Omt2b  
1455042\_at 0.97060 Transducin (beta)-like 1 X-linked Tbl1x  
1455043\_at 1.11599 transportin 1 Tnpol  
1455044\_at 0.78417 transmembrane protein 44 Tmem44

1455045\_at 0.81894 serine racemase Srr  
1455046\_a\_at 0.86484 pogo transposable element with ZNF domain Pogz  
1455047\_at 0.94181 F-box only protein 3 Fbxo3  
1455048\_at 0.95505 "immunoglobulin superfamily, member 3" Igsf3  
1455049\_at 0.89870 "immunoglobulin superfamily, member 3" Igsf3  
1455050\_at 1.00236 RIKEN cDNA E130203B14 gene E130203B14Rik  
1455051\_at 0.97311 ring finger protein 31 Rnf31  
1455052\_a\_at 0.94921 RIKEN cDNA 2410129H14 gene 2410129H14Rik  
1455053\_a\_at 0.89913 "DCUN1D1 DCN1, defective in cullin neddylation 1, domain containing 1 (S. cerevisiae)" Dcun1d1  
1455054\_a\_at 0.99641 "testis derived transcript 3, pseudogene /// DCUN1D1 DCN1, defective in cullin neddylation 1, domain containing 1 (S. cerevisiae)" Tes3-ps /// Dcun1d1  
1455055\_at 0.88811 RIKEN cDNA 4930562D19 gene 4930562D19Rik  
1455056\_at 1.06559 LIM domain only 7 Lmo7  
1455057\_at 0.97516 guanine monphosphate synthetase Gmps  
1455058\_at 0.92273 myotubularin related protein 9 Mtmr9  
1455059\_at 0.79990 RIKEN cDNA 9430093I07 gene 9430093I07Rik  
1455060\_at 0.96543 Ras-GTPase-activating protein SH3-domain binding protein RP23-336J1.4  
1455061\_a\_at 0.89415 acetyl-Coenzyme A acyltransferase 2 (mitochondrial 3-oxoacyl-Coenzyme A thiolase) Acaa2  
1455062\_at 1.03116 expressed sequence AU017455 AU017455  
1455063\_at 0.90826 RIKEN cDNA 4921513D11 gene /// expressed sequence AW061290  
4921513D11Rik /// AW061290  
1455064\_at 0.85210 "RAB36, member RAS oncogene family" Rab36  
1455065\_x\_at 1.08106 glucosamine-6-phosphate deaminase 1 /// similar to Glucosamine-6-phosphate isomerase (Glucosamine-6-phosphate deaminase) (GNPDA) (GlcN6P deaminase) (Oscillin) /// similar to Glucosamine-6-phosphate isomerase (Glucosamine-6-phosphate deaminase) (GNPDA) (GlcN6P deaminase) (Oscillin) Gnpda1 /// LOC231914 /// LOC667410  
1455066\_s\_at 0.89532 RIKEN cDNA 9130229H14 gene 9130229H14Rik  
1455067\_at 1.03473 pleckstrin and Sec7 domain containing 4 Psd4  
1455068\_at 1.04590 pleckstrin and Sec7 domain containing 4 Psd4  
1455069\_x\_at 0.97419 "solute carrier family 25 (mitochondrial carrier, adenine nucleotide translocator), member 4" Slc25a4  
1455070\_at 1.14171 DCP2 decapping enzyme homolog (S. cerevisiae) Dcp2  
1455071\_at 0.96278 Vzinc finger and BTB domain containing 7B Zbtb7b  
1455072\_at 0.95679 centrosomal protein 350 Cep350  
1455073\_at 0.81362 cytidine and dCMP deaminase domain containing 1 Cdadc1  
1455074\_at 1.10785 --- ---  
1455075\_at 0.95616 "phosphatidylinositol glycan anchor biosynthesis, class V" Pigv  
1455076\_a\_at 0.90175 RIKEN cDNA 4933424B01 gene 4933424B01Rik  
1455077\_a\_at 0.95870 mortality factor 4 like 1 /// similar to mortality factor 4 like 1 isoform b /// RIKEN cDNA A730098P11 gene /// similar to mortality factor 4 like 1 /// similar to mortality factor 4 like 1 (predicted) Morf4l1 /// LOC433955 /// A730098P11Rik /// LOC627352 /// LOC635663

1455078\_at 1.03641 "Heat shock protein 90kDa alpha (cytosolic), class A member 1" Hsp90aa1  
 1455079\_at 0.83993 "DCN1, defective in cullin neddylation 1, domain containing 4 (S. cerevisiae)"  
 Dcun1d4  
 1455080\_at 0.81273 "protein phosphatase 1, regulatory (inhibitor) subunit 16B" Ppp1r16b  
 1455081\_at 0.91788 thioredoxin-like 4B Txnl4b  
 1455082\_at 0.72236 Casitas B-lineage lymphoma b Cblb  
 1455083\_at 0.89985 "Atpase, class VI, type 11C" Atp11c  
 1455084\_x\_at 1.10008 serine hydroxymethyl transferase 2 (mitochondrial) Shmt2  
 1455085\_at 0.93466 RIKEN cDNA 1700086L19 gene 1700086L19Rik  
 1455086\_at 0.94574 Ubiquitin carboxyl-terminal esterase L5 Uchl5  
 1455087\_at 0.89127 "DNA segment, Chr 7, ERATO Doi 715, expressed" D7Ertd715e  
 1455088\_at 0.94277 similar to Ser/Thr protein kinase PAR-1A /// similar to serine/threonine  
 kinase /// similar to serine/threonine kinase /// similar to serine/threonine kinase /// similar to serine/  
 threonine kinase /// similar to serine/threonine kinase /// similar to serine/threonine kinase /// similar to  
 serine/threonine kinase /// similar to KP78a CG6715-PA /// similar to MAP/microtubule affinity-  
 regulating kinase 1 LOC381936 /// LOC545926 /// LOC620736 /// LOC628664 /// LOC667151 ///  
 LOC667378 /// LOC667522 /// LOC667570 /// LOC672121 /// LOC672131  
 1455089\_at 1.11257 "guanine nucleotide binding protein (G protein), gamma 12" Gng12  
 1455090\_at 0.68764 angiopoietin-like 2 Angptl2  
 1455091\_at 0.86243 RIKEN cDNA 3222402P14 gene 3222402P14Rik  
 1455092\_at 1.20582 zinc finger protein 207 Zfp207  
 1455093\_a\_at 0.97536 alpha-2-HS-glycoprotein Ahsg  
 1455094\_s\_at 0.97452 "ubiquitin-conjugating enzyme E2G 1 (UBC7 homolog, C. elegans)" Ube2g1  
 1455095\_at 0.97574 "histone 2, H2be" Hist2h2be  
 1455096\_at 1.05576 --- ---  
 1455097\_at 0.96106 WD repeat domain 70 Wdr70  
 1455098\_a\_at 1.02814 vitronectin Vtn  
 1455099\_at 0.98861 monoacylglycerol O-acyltransferase 2 Mogat2  
 1455100\_at 0.97866 "aldo-keto reductase family 1, member D1" Akr1d1  
 1455101\_at 1.11686 "Mus musculus, clone IMAGE:2647821, mRNA" ---  
 1455102\_at 1.11902 RIKEN cDNA D330037H05 gene /// similar to La-related protein 4 (La  
 ribonucleoprotein domain family member 4) /// similar to La-related protein 4 (La ribonucleoprotein  
 domain family member 4) D330037H05Rik /// LOC673040 /// LOC677019  
 1455103\_at 1.01157 DEAD (Asp-Glu-Ala-Asp) box polypeptide 46 Ddx46  
 1455104\_at 0.79049 MAX dimerization protein 1 Mxd1  
 1455105\_at 1.03269 "protein tyrosine phosphatase, non-receptor type 12" Ptpn12  
 1455106\_a\_at 0.76915 "creatine kinase, brain" Ckb  
 1455107\_at 1.20579 serine/arginine-rich protein specific kinase 1 Srpk1  
 1455108\_at 0.94787 eukaryotic translation initiation factor 4E member 2 Eif4e2  
 1455109\_at 0.85219 transducin (beta)-like 1X-linked receptor 1 Tbl1xr1  
 1455110\_at 1.06515 "GA repeat binding protein, beta 2" Gabpb2  
 1455111\_at 0.83505 "Yip1 domain family, member 6" Yipf6  
 1455112\_at 0.85565 apoptosis-inducing factor (AIF)-like mitochondrion-associated inducer of death

## Amid

1455113\_at 1.10923 armadillo repeat containing 8 Armc8  
 1455114\_at 1.01809 uracil DNA glycosylase 2 Ung2  
 1455115\_a\_at 0.95926 crumbs homolog 3 (Drosophila) Crb3  
 1455116\_at 1.06273 "tumor necrosis factor receptor superfamily, member 19-like /// similar to GrpE protein homolog 2, mitochondrial precursor (Mt-GrpE#2)" Tnfrsf191 /// LOC671976  
 1455117\_at 0.92066 minichromosome maintenance deficient domain containing 1 Mcmdc1  
 1455118\_at 1.10366 "DNA segment, Chr 9, ERATO Doi 402, expressed" D9Ert402e  
 1455119\_at 1.09571 phosphatidic acid phosphatase type 2 domain containing 1A Ppapdc1a  
 1455120\_at 1.21072 glyoxalase domain containing 1 Gloxd1  
 1455121\_at 0.99124 ligand dependent nuclear receptor corepressor Lcor  
 1455122\_at 0.93109 patched domain containing 2 Ptchd2  
 1455123\_at 1.00359 suppression of tumorigenicity 18 St18  
 1455124\_at 0.86969 tripartite motif containing 68 Trim68  
 1455125\_at 0.94140 "centaurin, beta 1" Centb1  
 1455126\_x\_at 1.00495 RIKEN cDNA 2310028O11 gene 2310028O11Rik  
 1455127\_at 1.03398 "X Kell blood group precursor-related family, member 5" Xkr5  
 1455128\_x\_at 0.99131 trinucleotide repeat containing 6a Tnrc6a  
 1455129\_at 1.07224 Metadherin Mtdh  
 1455130\_at 0.90835 "SPT2, Suppressor of Ty, domain containing 1 (S. cerevisiae)" Spty2d1  
 1455131\_at 1.09184 optic atrophy 3 (human) Opa3  
 1455132\_at 0.98723 RIKEN cDNA A430107D22 gene A430107D22Rik  
 1455133\_s\_at 0.98375 expressed sequence AI848100 AI848100  
 1455134\_at 1.08946 RIKEN cDNA A630051L19 gene A630051L19Rik  
 1455135\_at 0.81074 RIKEN cDNA 2610014I16 gene 2610014I16Rik  
 1455136\_at 0.98194 "ATPase, Na<sup>+</sup>/K<sup>+</sup> transporting, alpha 2 polypeptide" Atp1a2  
 1455137\_at 0.58413 Rap guanine nucleotide exchange factor (GEF) 5 Rapgef5  
 1455138\_x\_at 1.01555 "cofilin 1, non-muscle" Cfl1  
 1455139\_at 0.71931 expressed sequence AI851716 AI851716  
 1455140\_at 0.71861 RIKEN cDNA A330068P14 gene A330068P14Rik  
 1455141\_at 0.91063 trinucleotide repeat containing 6a Tnrc6a  
 1455142\_at 0.92585 suppressor of cytokine signaling 4 Socs4  
 1455143\_at 1.02527 neuroligin 2 Nlgn2  
 1455144\_s\_at 0.81636 expressed sequence AU040829 AU040829  
 1455145\_at 0.90353 "14, 17 days embryo head cDNA, RIKEN full-length enriched library, clone:3222402J19 product:unclassifiable, full insert sequence" ---  
 1455146\_at 0.92265 RIKEN cDNA C230082I21 gene C230082I21Rik  
 1455147\_at 1.03342 "PREDICTED: Mus musculus similar to KIAA1913 (LOC622645), mRNA" ---  
 1455148\_at 1.09406 transmembrane protein 130 Tmem130  
 1455149\_at 1.08256 SH3 domain containing ring finger 1 Sh3rf1  
 1455150\_at 0.95231 "13 days embryo forelimb cDNA, RIKEN full-length enriched library, clone:5930438H13 product:unclassifiable, full insert sequence" ---  
 1455151\_at 0.96500 A kinase (PRKA) anchor protein (yotiao) 9 Akap9

1455152\_at 1.01272 expressed sequence AI462493 AI462493  
1455153\_at 1.01472 zinc finger protein 236 Zfp236  
1455154\_at 1.05517 GLI-Kruppel family member GLI3 Gli3  
1455155\_at 1.10105 "LSM14 homolog B (SCD6, S. cerevisiae)" Lsm14b  
1455156\_at 1.04254 "striatin, calmodulin binding protein" Strn  
1455157\_a\_at 0.98300 cDNA sequence BC039210 BC039210  
1455158\_at 0.95367 integrin alpha 3 Itga3  
1455159\_at 0.96377 RIKEN cDNA 2900057D21 gene 2900057D21Rik  
1455160\_at 0.57677 RIKEN cDNA 2610203C20 gene 2610203C20Rik  
1455161\_at 1.09617 expressed sequence AI504432 AI504432  
1455162\_at 1.28898 RIKEN cDNA 4922503N01 gene 4922503N01Rik  
1455163\_at 0.94674 GUF1 GTPase homolog (S. cerevisiae) Guf1  
1455164\_at 1.04838 Cdc42 GTPase-activating protein Cdgap  
1455165\_at 1.00945 RAR-related orphan receptor alpha Rora  
1455166\_at 0.97005 expressed sequence AW146430 AW146430  
1455167\_at 0.92194 "cytochrome c oxidase, subunit VIIIc" Cox8c  
1455168\_a\_at 1.04405 "guanine nucleotide binding protein (G protein), beta polypeptide 2 like 1"  
Gnb211  
1455169\_at 0.89952 RAB11 family interacting protein 2 (class I) Rab11fip2  
1455170\_at 1.09505 RIKEN cDNA 2810001G20 gene 2810001G20Rik  
1455171\_at 0.94321 suppressor of variegation 4-20 homolog 1 (Drosophila) Suv420h1  
1455172\_at 1.01303 expressed sequence AU020094 AU020094  
1455173\_at 1.18866 G1 to S phase transition 1 Gspt1  
1455174\_at 1.09568 ribosomal protein S19 binding protein 1 Rps19bp1  
1455175\_at 0.88337 PHD finger protein 13 Phf13  
1455176\_a\_at 0.93829 synaptotagmin XI Syt11  
1455177\_at 0.84327 Abelson helper integration site Ahi1  
1455178\_at 0.83505 RUN and TBC1 domain containing 1 Rutbc1  
1455179\_at 0.99909 "membrane protein, palmitoylated 7 (MAGUK p55 subfamily member 7)"  
Mpp7  
1455180\_at 0.70679 expressed sequence AA407270 AA407270  
1455181\_at 1.24853 RAS p21 protein activator 2 Rasa2  
1455182\_at 1.04853 kinesin family member 1B Kif1b  
1455183\_at 0.96163 serine/threonine kinase 38 like Stk38l  
1455184\_at 1.13366 "MOB1, Mps One Binder kinase activator-like 1A (yeast)" Mobk1a  
1455185\_s\_at 1.11895 --- ---  
1455186\_a\_at 1.07321 RIKEN cDNA 1190003J15 gene 1190003J15Rik  
1455187\_at 1.06720 zinc finger and BTB domain containing 40 /// similar to zinc finger and BTB  
domain containing 40 Zbtb40 /// LOC638050  
1455188\_at 0.92348 Eph receptor B1 Ephb1  
1455189\_at 0.91496 tripartite motif protein 33 /// RIKEN cDNA 8030451N04 gene Trim33 ///  
8030451N04Rik  
1455190\_at 0.92624 "guanine nucleotide binding protein (G protein), gamma 7 subunit" Gng7

|              |         |                                                                    |               |
|--------------|---------|--------------------------------------------------------------------|---------------|
| 1455191_x_at | 1.09385 | "Phosphatidylinositol-4-phosphate 5-kinase, type 1 beta"           | Pip5k1b       |
| 1455192_at   | 0.93236 | RIKEN cDNA A230078I05 gene                                         | A230078I05Rik |
| 1455193_at   | 0.95686 | zinc finger and BTB domain containing 8                            | Zbtb8         |
| 1455194_at   | 0.79297 | mitogen-activated protein kinase 8 interacting protein 2           | Mapk8ip2      |
| 1455195_at   | 1.34520 | ribosomal protein S24                                              | Rps24         |
| 1455196_s_at | 0.89706 | expressed sequence AA987161                                        | AA987161      |
| 1455197_at   | 1.14904 | Rho family GTPase 1                                                | Rnd1          |
| 1455198_a_at | 0.95271 | "protein phosphatase 2 (formerly 2A), regulatory subunit B, alpha" | Ppp2r3a       |
| 1455199_at   | 0.98289 | expressed sequence AI429214                                        | AI429214      |
| 1455200_at   | 0.85927 | p21 (CDKN1A)-activated kinase 6                                    | Pak6          |
| 1455201_x_at | 1.11310 | apolipoprotein A-I                                                 | Apoa1         |
| 1455202_at   | 0.83013 | "gene model 50, (NCBI)"                                            | Gm50          |
| 1455203_at   | 1.01261 | RIKEN cDNA A930003A15 gene                                         | A930003A15Rik |
| 1455204_at   | 1.01794 | "phosphatidylinositol transfer protein, cytoplasmic 1"             | Pitpnc1       |
| 1455205_a_at | 0.80296 | ubiquitin specific peptidase 19                                    | Usp19         |
| 1455206_at   | 0.96568 | Hypothetical protein C130006E23                                    | C130006E23    |
| 1455207_at   | 1.12103 | RIKEN cDNA 2410017P09 gene                                         | 2410017P09Rik |
| 1455208_at   | 0.98078 | peroxisome biogenesis factor 19                                    | Pex19         |
| 1455209_at   | 0.94743 | "Phosphoenolpyruvate carboxykinase 1, cytosolic"                   | Pck1          |
| 1455210_at   | 1.01221 | zinc fingers and homeoboxes protein 2                              | Zhx2          |
| 1455211_a_at | 1.12243 | translocase of inner mitochondrial membrane 13 homolog (yeast)     | Timm13        |
| 1455212_at   | 0.97386 | WD repeat domain 24                                                | Wdr24         |
| 1455213_at   | 0.95747 | RIKEN cDNA 4930488E11 gene                                         | 4930488E11Rik |
| 1455214_at   | 0.68622 | microphthalmia-associated transcription factor                     | Mitf          |
| 1455215_at   | 1.09702 | RIKEN cDNA C530028O21 gene                                         | C530028O21Rik |
| 1455216_at   | 1.20765 | progesterin and adipoQ receptor family member VI                   | Paqr6         |
| 1455217_at   | 0.91261 | leucine-rich repeats and immunoglobulin-like domains 2             | Lrig2         |
| 1455218_at   | 0.95291 | RIKEN cDNA 6330503K22 gene                                         | 6330503K22Rik |
| 1455219_at   | 0.96745 | RIKEN cDNA 1110030E23 gene                                         | 1110030E23Rik |
| 1455220_at   | 0.91496 | frequently rearranged in advanced T-cell lymphomas 2               | Frat2         |
| 1455221_at   | 1.02760 | "ATP-binding cassette, sub-family G (WHITE), member 1"             | Abcg1         |
| 1455222_a_at | 1.00668 | upstream binding protein 1                                         | Ubp1          |
| 1455223_at   | 1.11355 | insulin-like growth factor 2 mRNA binding protein 1                | Igf2bp1       |
| 1455224_at   | 0.89288 | angiopoietin-like 1                                                | Angptl1       |
| 1455225_at   | 1.03986 | synaptic nuclear envelope 1                                        | Syne1         |
| 1455226_at   | 0.77583 | spectrin beta 1                                                    | Spnb1         |
| 1455227_at   | 0.95685 | arylacetamide deacetylase-like 1                                   | Aadacl1       |
| 1455228_at   | 1.12053 | Wolf-Hirschhorn syndrome candidate 1 (human)                       | Whsc1         |
| 1455229_x_at | 1.06896 | phosphatidylglycerophosphate synthase 1                            | Pgs1          |
| 1455230_at   | 1.01171 | "calcium channel, voltage-dependent, gamma subunit 4"              | Cacng4        |
| 1455231_s_at | 1.01528 | ---                                                                | ---           |
| 1455232_at   | 1.00958 | camello-like 2                                                     | Cml2          |
| 1455233_at   | 0.94885 | mitochondrial ribosomal protein S11                                | Mrps11        |

1455234\_at 0.88574 "UDP-Gal:betaGlcNAc beta 1,3-galactosyltransferase, polypeptide 1"  
 B3galt1  
 1455235\_x\_at 1.01181 lactate dehydrogenase B Ldhb  
 1455236\_x\_at 0.97428 small EDRK-rich factor 2 Serf2  
 1455237\_at 1.01889 ubiquitin specific peptidase 36 Usp36  
 1455238\_at 0.70338 melanoma associated antigen (mutated) 1-like 1 Mum111  
 1455239\_at 0.85357 RIKEN cDNA 6330512M04 gene 6330512M04Rik  
 1455240\_x\_at 1.01532 hypothetical protein LOC666185 /// hypothetical protein LOC666222 ///  
 hypothetical protein LOC673030 LOC666185 /// LOC666222 /// LOC673030  
 1455241\_at 0.98776 cDNA sequence BC037703 BC037703  
 1455242\_at 0.93922 forkhead box P1 Foxp1  
 1455243\_at 0.99480 "bromodomain and PHD finger containing, 3" Brpf3  
 1455244\_at 0.94636 dishevelled associated activator of morphogenesis 1 Daam1  
 1455245\_x\_at 1.04500 ribosomal protein L13 Rpl13  
 1455246\_at 1.12925 "SWI/SNF related, matrix associated, actin dependent regulator of chromatin,  
 subfamily c, member 1" Smarcc1  
 1455247\_at 1.02061 angiomin-1-like 1 Amotl1  
 1455248\_at 1.01127 RIKEN cDNA 0610011N22 gene 0610011N22Rik  
 1455249\_at 0.88823 "10 days neonate skin cDNA, RIKEN full-length enriched library,  
 clone:4732480G12 product:unclassifiable, full insert sequence" ---  
 1455250\_at 0.83573 SH3-domain binding protein 4 Sh3bp4  
 1455251\_at 0.74334 integrin alpha 1 Itga1  
 1455252\_at 1.08679 tuberous sclerosis 1 Tsc1  
 1455253\_at 0.86534 RIKEN cDNA 4930535B03 gene 4930535B03Rik  
 1455254\_at 0.93366 RIKEN cDNA 4833420G11 gene 4833420G11Rik  
 1455255\_at 0.99778 RIKEN cDNA 4833420G11 gene 4833420G11Rik  
 1455256\_at 0.59979 TRAF2 and NCK interacting kinase /// similar to [Segment 1 of 2] Traf2 and  
 NCK-interacting kinase /// region containing TRAF2 and NCK interacting kinase; RIKEN cDNA  
 C630040K21 gene Tnik /// LOC665113 /// LOC674765  
 1455257\_at 0.99241 integrin beta 3 Itgb3  
 1455258\_at 1.00940 "potassium voltage gated channel, Shaw-related subfamily, member 2" Kcnc2  
 1455259\_a\_at 1.17471 RIKEN cDNA D530033C11 gene D530033C11Rik  
 1455260\_at 0.86179 ligand dependent nuclear receptor corepressor-like Lcorl  
 1455261\_at 1.14363 "PREDICTED: Mus musculus similar to Hemoglobin alpha subunit  
 (Hemoglobin alpha chain) (Alpha-globin) (LOC383229), mRNA" ---  
 1455262\_at 0.81662 "thrombospondin, type I, domain containing 4" Thsd4  
 1455263\_at 1.12678 RIKEN cDNA 9030625A04 gene 9030625A04Rik  
 1455264\_at 0.96307 C1q domain containing 2 C1qdc2  
 1455265\_a\_at 0.99964 regulator of G-protein signaling 16 Rgs16  
 1455266\_at 0.92186 kinesin family member 5C Kif5c  
 1455267\_at 1.00901 estrogen-related receptor gamma Esrrg  
 1455268\_at 0.83397 "zinc finger, CSL domain containing 2" Zcs12  
 1455269\_a\_at 0.93930 "coronin, actin binding protein 1A" Coro1a



|              |         |                                                                           |               |  |
|--------------|---------|---------------------------------------------------------------------------|---------------|--|
| 1455270_at   | 1.02485 | ---                                                                       | ---           |  |
| 1455271_at   | 1.08256 | hypothetical protein LOC620695                                            | LOC620695     |  |
| 1455272_at   | 0.96405 | "glutamate receptor, metabotropic 5"                                      | Grm5          |  |
| 1455273_at   | 1.04582 | ---                                                                       | ---           |  |
| 1455274_at   | 1.01697 | Nonagouti                                                                 | a             |  |
| 1455275_at   | 1.06791 | RIKEN cDNA E530001K10 gene                                                | E530001K10Rik |  |
| 1455276_x_at | 0.89430 | RIKEN cDNA 1110004E09 gene                                                | 1110004E09Rik |  |
| 1455277_at   | 1.18217 | Hedgehog-interacting protein                                              | Hhip          |  |
| 1455278_at   | 0.99465 | WD repeat domain 37                                                       | Wdr37         |  |
| 1455279_at   | 0.93272 | "gene model 1060, (NCBI)"                                                 | Gm1060        |  |
| 1455280_at   | 0.98445 | Fras1 related extracellular matrix protein 1                              | Frem1         |  |
| 1455281_at   | 0.91041 | WD repeat domain 33                                                       | Wdr33         |  |
| 1455282_x_at | 1.04345 | aminolevulinic acid synthase 1                                            | Alas1         |  |
| 1455283_x_at | 0.95029 | NADH dehydrogenase (ubiquinone) Fe-S protein 8                            | Ndufs8        |  |
| 1455284_x_at | 1.34308 | "phosphatidylinositol glycan anchor biosynthesis, class X"                | Pigx          |  |
| 1455285_at   | 1.07233 | "solute carrier family 31, member 1"                                      | Slc31a1       |  |
| 1455286_at   | 0.95958 | BTB (POZ) domain containing 1                                             | Btbd1         |  |
| 1455287_at   | 1.18602 | cyclin-dependent kinase 6                                                 | Cdk6          |  |
| 1455288_at   | 0.91560 | RIKEN cDNA 1110036O03 gene                                                | 1110036O03Rik |  |
| 1455289_at   | 0.90231 | ankyrin repeat domain 13b                                                 | Ankrd13b      |  |
| 1455290_at   | 0.93473 | zinc and ring finger 2                                                    | Znrf2         |  |
| 1455291_s_at | 0.99624 | zinc and ring finger 2                                                    | Znrf2         |  |
| 1455292_x_at | 0.84808 | Regulator of sex limited protein-Slp 1                                    | Rsl1          |  |
| 1455293_at   | 0.95205 | "Leo1, Paf1/RNA polymerase II complex component, homolog (S. cerevisiae)" | Leo1          |  |
| 1455294_at   | 1.03084 | RIKEN cDNA 1110029L17 gene                                                | 1110029L17Rik |  |
| 1455295_at   | 0.96661 | cDNA sequence BC031853                                                    | BC031853      |  |
| 1455296_at   | 0.76131 | adenylate cyclase 5                                                       | Adcy5         |  |
| 1455297_at   | 1.00455 | "spindlin family, member 2"                                               | Spin2         |  |
| 1455298_at   | 0.92162 | Transcribed locus                                                         | ---           |  |
| 1455299_at   | 0.87908 | RIKEN cDNA 1700110N18 gene                                                | 1700110N18Rik |  |
| 1455300_at   | 0.97509 | RIKEN cDNA E130014J05 gene                                                | E130014J05Rik |  |
| 1455301_at   | 0.88138 | expressed sequence BQ952480                                               | BQ952480      |  |
| 1455302_at   | 0.99136 | vacuolar protein sorting 29 (S. pombe)                                    | Vps29         |  |
| 1455303_at   | 1.05870 | ---                                                                       | ---           |  |
| 1455304_at   | 1.09867 | unc-13 homolog C (C. elegans)                                             | Unc13c        |  |
| 1455305_x_at | 1.02863 | heterogeneous nuclear ribonucleoprotein A1                                | Hnrpa1        |  |
| 1455306_at   | 0.88830 | cDNA sequence BC037112                                                    | BC037112      |  |
| 1455307_at   | 0.88730 | cDNA sequence BC037112                                                    | BC037112      |  |
| 1455308_at   | 0.89976 | transmembrane protein 16F                                                 | Tmem16f       |  |
| 1455309_at   | 0.89668 | transmembrane protein 16F                                                 | Tmem16f       |  |
| 1455310_at   | 1.01005 | RNA binding motif protein 16                                              | Rbm16         |  |
| 1455311_at   | 0.94403 | DiGeorge syndrome critical region gene 8                                  | Dgcr8         |  |

1455312\_at 1.01768 polyhomeotic-like 3 (Drosophila) Phc3  
1455313\_at 0.96182 actin-binding LIM protein 2 Ablim2  
1455314\_at 0.96109 LIM domain containing preferred translocation partner in lipoma Lpp  
1455315\_at 0.86899 tumor protein p53 inducible protein 13 Trp53i13  
1455316\_x\_at 1.15032 "Solute carrier family 15 (H+/peptide transporter), member 2 /// Potassium voltage-gated channel, subfamily H (eag-related), member 6 /// 17 days pregnant adult female amnion cDNA, RIKEN full-length enriched library, clone:I920040L03 product:unclassifiable, full insert sequence" Slc15a2 /// Kcnh6  
1455317\_at 1.01053 enhancer of polycomb homolog 2 (Drosophila) Epc2  
1455318\_at 0.95866 T-cell immunoglobulin and mucin domain containing 4 Timd4  
1455319\_x\_at 1.07796 ribosomal protein S8 Rps8  
1455320\_at 1.25985 --- ---  
1455321\_at 1.06859 DDHD domain containing 1 Ddhd1  
1455322\_at 1.04256 tetratricopeptide repeat domain 21B Ttc21b  
1455323\_at 0.82653 RB-associated KRAB repressor Rbak  
1455324\_at 0.96986 hypothetical LOC433022 LOC433022  
1455325\_at 0.95595 RIKEN cDNA A230057G18 gene A230057G18Rik  
1455326\_at 0.99147 RIKEN cDNA 4932416N17 gene 4932416N17Rik  
1455327\_at 1.12712 SUMO/sentrin specific peptidase 2 Senp2  
1455328\_at 0.96739 "amiloride-sensitive cation channel 2, neuronal" Accn2  
1455329\_at 1.11202 --- ---  
1455330\_at 0.98822 nucleolar protein 9 Nol9  
1455331\_at 0.93329 RIKEN cDNA 9430067K14 gene 9430067K14Rik  
1455332\_x\_at 0.95811 "Fc receptor, IgG, low affinity IIb" Fcgr2b  
1455333\_at 0.96529 tensin 3 Tns3  
1455334\_at 1.00418 RIKEN cDNA 9830167H18 gene 9830167H18Rik  
1455335\_at 0.88765 X-ray repair complementing defective repair in Chinese hamster cells 2 Xrcc2  
1455336\_at 0.90013 "THAP domain containing, apoptosis associated protein 2" Thap2  
1455337\_at 1.02485 "FYVE, RhoGEF and PH domain containing 4" Fgd4  
1455338\_at 1.10988 "alpha 1,4-galactosyltransferase" A4galt  
1455339\_at 1.11019 RIKEN cDNA C430014M02 gene C430014M02Rik  
1455340\_at 1.02900 Expressed sequence AI852444 AI852444  
1455341\_at 1.09217 RIKEN cDNA 2010003J03 gene 2010003J03Rik  
1455342\_at 1.05045 RIKEN cDNA A230083H22 gene A230083H22Rik  
1455343\_at 0.89931 "pleckstrin homology domain containing, family A member 7" Plekha7  
1455344\_at 1.08793 ephrin A3 Efna3  
1455345\_at 1.19483 PHD finger protein 15 Phf15  
1455346\_at 0.64775 mannan-binding lectin serine peptidase 1 Masp1  
1455347\_at 0.98139 regulator of telomere elongation helicase 1 Rtel1  
1455348\_x\_at 1.12203 ribosomal protein L29 /// similar to 60S ribosomal protein L29 /// hypothetical protein LOC669999 /// similar to 60S ribosomal protein L29 ///

similar to 60S ribosomal protein L29 Rpl29 /// LOC433350 /// LOC433941 /// LOC622707 ///  
 LOC626772 /// LOC665032 /// LOC666642 /// LOC667466 /// LOC669999 /// LOC670334 ///  
 LOC675846

1455349\_at 1.03490 RAS related protein 1b Rap1b  
 1455350\_at 1.03349 transmembrane protein 62 Tmem62  
 1455351\_at 0.91450 expressed sequence AU023006 AU023006  
 1455352\_at 1.02571 expressed sequence AU023006 AU023006  
 1455353\_at 0.90854 transmembrane and coiled coil domains 1 Tmcc1  
 1455354\_at 0.96346 WD repeat domain 22 Wdr22  
 1455355\_at 1.04162 RIKEN cDNA 6030408C04 gene 6030408C04Rik  
 1455356\_at 0.94008 calmodulin regulated spectrin-associated protein 1 Camsap1  
 1455357\_x\_at 1.10037 translocase of outer mitochondrial membrane 20 homolog (yeast) Tomm20  
 1455358\_at 1.00275 Ataxin 2 binding protein 1 A2bp1  
 1455359\_at 0.96901 "protein tyrosine phosphatase, non-receptor type 14" Ptpn14  
 1455360\_at 1.02348 RIKEN cDNA 4833412L08 gene 4833412L08Rik  
 1455361\_at 0.98998 "diacylglycerol kinase, beta" Dgkb  
 1455362\_at 0.97160 --- ---  
 1455363\_at 1.15982 brain-specific angiogenesis inhibitor 1 Bai1  
 1455364\_a\_at 1.06099 ribosomal protein S7 /// similar to 40S ribosomal protein S7 (S8) Rps7 ///  
 LOC640050

1455365\_at 0.99234 cadherin 8 Cdh8  
 1455366\_at 0.96001 mitochondrial ribosomal protein L52 Mrpl52  
 1455367\_at 0.99708 dead end homolog 1 (zebrafish) Dnd1  
 1455368\_at 1.04990 "zinc finger, DHHC domain containing 3" Zdhhc3  
 1455369\_at 0.91129 "amyloid beta (A4) precursor protein binding, family A, member 1" Apba1  
 1455370\_at 1.14327 RIKEN cDNA A630023P12 gene A630023P12Rik  
 1455371\_at 0.94457 regulatory factor X-associated ankyrin-containing protein Rfxank  
 1455372\_at 0.73093 cytoplasmic polyadenylation element binding protein 3 Cpeb3  
 1455373\_at 1.07647 Transcribed locus ---  
 1455374\_at 0.89769 --- ---  
 1455375\_at 0.86735 similar to Protein enabled homolog (NPC-derived proline-rich protein 1)  
 (NDPP-1) LOC669787

1455376\_at 0.77468 RIKEN cDNA 1300010F03 gene 1300010F03Rik  
 1455377\_at 0.97528 RIKEN cDNA 4921517B04 gene 4921517B04Rik  
 1455378\_at 0.89043 cDNA sequence BC057371 BC057371  
 1455379\_at 1.05790 "dynein, axonemal, light intermediate polypeptide 1" Dnali1  
 1455380\_at 1.01002 prenylcysteine oxidase 1 like Pcyox11  
 1455381\_at 0.84202 RIKEN cDNA 4921513D23 gene 4921513D23Rik  
 1455382\_at 1.00662 ZW10 interactor Zwint  
 1455383\_at 0.95787 hypothetical protein C730043O17 C730043O17  
 1455384\_x\_at 0.99285 RIKEN cDNA D030056L22 gene D030056L22Rik  
 1455385\_at 1.11275 exocyst complex component 6 Exoc6  
 1455386\_at 1.26827 Transcribed locus ---

1455387\_at 1.09805 nuclear fragile X mental retardation protein interacting protein 2 Nufip2  
1455388\_at 0.88416 protein-L-isoaspartate (D-aspartate) O-methyltransferase domain containing 1 Pcmd1  
1455389\_s\_at 1.01445 RIKEN cDNA 2310051F07 gene 2310051F07Rik  
1455390\_at 0.92620 "RIKEN cDNA 1500005P14 gene /// alkB, alkylation repair homolog 6 (E. coli)" 1500005P14Rik /// Alkbh6  
1455391\_at 1.08529 RAD23a homolog (S. cerevisiae) Rad23a  
1455392\_at 1.07736 RIKEN cDNA 9630019K15 gene 9630019K15Rik  
1455393\_at 1.12626 --- ---  
1455394\_at 1.01203 protein inhibitor of activated STAT 4 Pias4  
1455395\_at 1.06090 "3-oxoacyl-ACP synthase, mitochondrial" Oxsm  
1455396\_at 0.93132 "ATPase, class I, type 8B, member 1" Atp8b1  
1455397\_at 0.98471 CASK interacting protein 1 Caskin1  
1455398\_at 0.73983 "leucine rich repeat containing 8 family, member C" Lrrc8c  
1455399\_at 0.79971 connector enhancer of kinase suppressor of Ras 1 /// similar to connector enhancer of kinase suppressor of Ras 1 Cnksr1 /// LOC637116  
1455400\_at 1.04172 dimethylarginine dimethylaminohydrolase 1 Ddah1  
1455401\_at 1.00776 "calcium/calmodulin-dependent protein kinase kinase 2, beta" Camkk2  
1455402\_at 0.85022 suppressor of cytokine signaling 7 Socs7  
1455403\_at 0.98424 "mannosidase, endo-alpha" Manea  
1455404\_at 0.99289 junctophilin 2 Jph2  
1455405\_at 0.83710 proline-serine-threonine phosphatase-interacting protein 2 Pstpip2  
1455406\_at 0.95708 "0 day neonate head cDNA, RIKEN full-length enriched library, clone:4833431M13 product:unclassifiable, full insert sequence" ---  
1455407\_at 0.91979 zinc finger protein 236 Zfp236  
1455408\_at 0.90828 "phospholipase A2, group IVF" Pla2g4f  
1455409\_at 1.24010 spire homolog 1 (Drosophila) Spire1  
1455410\_at 0.95878 Fas apoptotic inhibitory molecule 2 Faim2  
1455411\_at 0.92648 aquaporin 11 Aqp11  
1455412\_at 0.86936 --- ---  
1455413\_at 0.93594 zinc finger protein 11 Zfp11  
1455414\_at 0.97182 tetratricopeptide repeat domain 16 Ttc16  
1455415\_at 1.07660 RIKEN cDNA A730056A06 gene A730056A06Rik  
1455416\_at 0.96544 Riken cDNA C130021I20 gene C130021I20Rik  
1455417\_at 0.90982 "potassium inwardly rectifying channel, subfamily J, member 11" Kcnj11  
1455418\_at 0.80449 Transcribed locus ---  
1455419\_at 0.97890 RIKEN cDNA D630045J12 gene D630045J12Rik  
1455420\_at 1.03862 RAD23b homolog (S. cerevisiae) Rad23b  
1455421\_x\_at 0.95287 RIKEN cDNA 6330503C03 gene 6330503C03Rik  
1455422\_x\_at 1.16456 septin 4 4-Sep  
1455423\_at 0.98741 Nur77 downstream gene 1 /// similar to chromosome 6 open reading frame 148 Ndg1 /// LOC623189  
1455424\_at 0.93943 WNK lysine deficient protein kinase 2 Wnk2

1455425\_at 1.04914 expressed sequence BB001228 BB001228  
1455426\_at 0.94282 --- ---  
1455427\_at 0.96683 angiopoietin 4 Angpt4  
1455428\_at 0.89356 RIKEN cDNA A930008G19 gene A930008G19Rik  
1455429\_at 0.91132 expressed sequence AI450540 AI450540  
1455430\_at 1.00993 RIKEN cDNA 3200001K10 gene 3200001K10Rik  
1455431\_at 1.02759 "solute carrier family 5 (sodium/glucose cotransporter), member 1" Slc5a1  
1455432\_at 0.92102 TAO kinase 1 Taok1  
1455433\_at 1.12343 hypothetical protein LOC383216 MGC107415  
1455434\_a\_at 1.08477 kinectin 1 Ktn1  
1455435\_s\_at 1.08420 --- ---  
1455436\_at 1.02448 "DIRAS family, GTP-binding RAS-like 2" Diras2  
1455437\_at 0.98382 cDNA sequence BC033915 BC033915  
1455438\_at 0.81554 peroxisomal membrane protein 4 Pxmp4  
1455439\_a\_at 0.98493 "lectin, galactose binding, soluble 1" Lgals1  
1455440\_at 1.18206 chloride channel 6 Clcn6  
1455441\_at 0.87869 --- ---  
1455442\_at 0.96460 "solute carrier family 6 (neurotransmitter transporter), member 19" Slc6a19  
1455443\_at 1.01191 ganglioside-induced differentiation-associated protein 1-like 1 Gdap111  
1455444\_at 0.94229 "gamma-aminobutyric acid (GABA-A) receptor, subunit alpha 2" Gabra2  
1455445\_at 0.69005 cerebellin 3 precursor protein Cbln3  
1455446\_x\_at 0.94104 "acyl-Coenzyme A dehydrogenase, short/branched chain" Acadsb  
1455447\_at 1.07772 RIKEN cDNA D430019H16 gene D430019H16Rik  
1455448\_at 1.00198 5'-nucleotidase domain containing 3 Nt5dc3  
1455449\_at 1.02064 "gene model 468, (NCBI)" Gm468  
1455450\_at 0.93578 "protein tyrosine phosphatase, non-receptor type 3" Ptpn3  
1455451\_at 0.95966 expressed sequence AI449310 AI449310  
1455452\_x\_at 1.09275 expressed sequence AI449310 AI449310  
1455453\_at 1.15490 gem (nuclear organelle) associated protein 5 Gemin5  
1455454\_at 0.86385 "aldo-keto reductase family 1, member C19" Akr1c19  
1455455\_at 0.87295 glycosyltransferase 28 domain containing 2 Glt28d2  
1455456\_a\_at 0.93279 translocase of inner mitochondrial membrane 50 homolog (yeast) Timm50  
1455457\_at 0.94650 "cytochrome P450, family 2, subfamily c, polypeptide 50 /// cytochrome P450" Cyp2c50 /// Cyp2c54  
1455458\_x\_at 0.99130 GDP-mannose pyrophosphorylase A Gmppa  
1455459\_at 1.04588 PR domain containing 15 Prdm15  
1455460\_at 0.99314 RIKEN cDNA 6430547I21 gene 6430547I21Rik  
1455461\_at 0.96971 RIKEN cDNA A530017D24 gene A530017D24Rik  
1455462\_at 1.07004 adenylate cyclase 2 Adcy2  
1455463\_at 0.97283 phytanoyl-CoA hydroxylase interacting protein Phyhip  
1455464\_x\_at 1.48893 --- ---  
1455465\_at 0.97869 Sorting nexin 12 Snx12  
1455466\_at 0.97169 G protein-coupled receptor 133 /// similar to G protein-coupled receptor 133

## Gpr133 /// LOC669205

1455467\_at 0.76584 RIKEN cDNA C330043M08 gene C330043M08Rik  
 1455468\_at 0.95424 "0 day neonate kidney cDNA, RIKEN full-length enriched library, clone: D630029P09 product:unclassifiable, full insert sequence" ---  
 1455469\_at 0.93692 "solute carrier family 6 (neurotransmitter transporter, L-proline), member 7" Slc6a7  
 1455470\_x\_at 1.05821 LIM and SH3 protein 1 Lasp1  
 1455471\_at 0.97597 RIKEN cDNA 1500012D20 gene 1500012D20Rik  
 1455472\_at 1.04251 RIKEN cDNA A630071D13 gene A630071D13Rik  
 1455473\_at 1.00626 ubiquitin specific peptidase 13 (isopeptidase T-3) Usp13  
 1455474\_at 1.20717 "DNA segment, Chr 6, Wayne State University 116, expressed" D6Wsu116e  
 1455475\_at 1.04247 RIKEN cDNA 3110057O12 gene 3110057O12Rik  
 1455476\_a\_at 0.87067 genetic suppressor element 1 Gsel  
 1455477\_s\_at 1.03773 PDZK1 interacting protein 1 Pdzk1ip1  
 1455478\_at 1.23334 "protein tyrosine phosphatase, receptor type, f polypeptide (PTPRF), interacting protein, alpha 1" Ppfia1  
 1455479\_a\_at 1.04777 "ubiquitin-conjugating enzyme E2D 3 (UBC4/5 homolog, yeast)" Ube2d3  
 1455480\_s\_at 1.05693 "ubiquitin-conjugating enzyme E2D 3 (UBC4/5 homolog, yeast)" Ube2d3  
 1455481\_at 0.88761 iduronate 2-sulfatase Ids  
 1455482\_at 1.08330 "adaptor protein complex AP-2, alpha 2 subunit" Ap2a2  
 1455483\_at 0.92429 zinc finger protein 148 Zfp148  
 1455484\_at 1.04018 RIKEN cDNA 2600009P04 gene 2600009P04Rik  
 1455485\_x\_at 1.00415 ribosomal protein L13a Rpl13a  
 1455486\_at 0.87994 protein inhibitor of activated STAT 1 Pias1  
 1455487\_at 0.93693 RIKEN cDNA 2600014M03 gene 2600014M03Rik  
 1455488\_at 1.07197 RIKEN cDNA 6230416J20 gene 6230416J20Rik  
 1455489\_at 1.01294 leucine rich repeat transmembrane neuronal 2 Lrrtm2  
 1455490\_at 0.94727 "upstream binding transcription factor, RNA polymerase I" Ubtf  
 1455491\_at 1.01074 heterogeneous nuclear ribonucleoprotein H3 /// similar to heterogeneous nuclear ribonucleoprotein H3 isoform a Hnrph3 /// LOC669773  
 1455492\_at 0.98589 RIKEN cDNA B330016D10 gene B330016D10Rik  
 1455493\_at 1.11159 synaptic nuclear envelope 1 Syne1  
 1455494\_at 0.92578 "procollagen, type I, alpha 1" Coll1a1  
 1455495\_at 1.00586 Expressed sequence AA536808 AA536808  
 1455496\_at 1.09417 phosphoribosylformylglycinamide synthase (FGAR amidotransferase) Pfas  
 1455497\_at 0.92392 leukocyte receptor cluster (LRC) member 9 Leng9  
 1455498\_at 1.08387 G-protein-coupled receptor 50 Gpr50  
 1455499\_at 0.99742 neurexin II Nrnx2  
 1455500\_at 1.01572 "DNA segment, Chr 11, ERATO Doi 759, expressed /// similar to chromosome 17 open reading frame 27" D11Ertd759e /// LOC672513  
 1455501\_at 1.05999 "solute carrier family 2 (facilitated glucose transporter), member 12" Slc2a12  
 1455502\_at 0.98685 MAP-kinase activating death domain Madd  
 1455503\_at 0.92560 "zinc finger protein 85, related sequence 1 /// zinc finger protein 273"

## Zfp85-rs1 /// Zfp273

|              |         |                                                                                                                  |               |
|--------------|---------|------------------------------------------------------------------------------------------------------------------|---------------|
| 1455504_a_at | 1.00852 | "makorin, ring finger protein, 1"                                                                                | Mkrn1         |
| 1455505_at   | 0.96264 | GATA zinc finger domain containing 2A                                                                            | Gatad2a       |
| 1455506_at   | 1.02331 | "solute carrier family 25, member 34"                                                                            | Slc25a34      |
| 1455507_s_at | 0.89939 | "DNA segment, Chr 8, ERATO Doi 587, expressed"                                                                   | D8Ert587e     |
| 1455508_at   | 1.00497 | RIKEN cDNA A530082C11 gene                                                                                       | A530082C11Rik |
| 1455509_at   | 0.82132 | cDNA sequence AB182283                                                                                           | AB182283      |
| 1455510_at   | 1.70333 | Speckle-type POZ protein                                                                                         | Spop          |
| 1455511_at   | 0.77496 | selenophosphate synthetase 1                                                                                     | Sephs1        |
| 1455512_at   | 0.83008 | "gene model 879, (NCBI)"                                                                                         | Gm879         |
| 1455513_at   | 1.23514 | "TAF1 RNA polymerase II, TATA box binding protein (TBP)-associated factor"                                       | Taf1          |
| 1455514_at   | 1.05436 | "potassium voltage-gated channel, Shal-related family, member 1"                                                 | Kcnd1         |
| 1455515_at   | 0.98653 | RIKEN cDNA 1810041L15 gene                                                                                       | 1810041L15Rik |
| 1455516_at   | 0.93516 | Transcribed locus                                                                                                | ---           |
| 1455517_at   | 1.07111 | RNA binding motif protein 4                                                                                      | Rbm4          |
| 1455518_at   | 0.93074 | "Transcribed locus, weakly similar to XP_232745.3 PREDICTED: hypothetical protein XP_232745 [Rattus norvegicus]" | ---           |
| 1455519_at   | 1.01858 | desmoglein 1 beta                                                                                                | Dsg1b         |
| 1455520_at   | 0.98093 | hypothetical protein LOC629605                                                                                   | LOC629605     |
| 1455521_at   | 0.96668 | Kruppel-like factor 12                                                                                           | Klf12         |
| 1455522_at   | 0.88404 | Rho guanine nucleotide exchange factor (GEF) 15                                                                  | Arhgef15      |
| 1455523_at   | 0.92935 | "cleavage stimulation factor, 3' pre-RNA subunit 2"                                                              | Cstf2         |
| 1455524_at   | 1.08203 | RIKEN cDNA 2810046L04 gene                                                                                       | 2810046L04Rik |
| 1455525_at   | 0.98837 | endonuclease G-like 1                                                                                            | Endog1        |
| 1455526_at   | 1.09719 | "DIRAS family, GTP-binding RAS-like 1"                                                                           | Diras1        |
| 1455527_at   | 1.12161 | RIKEN cDNA E430002D04 gene                                                                                       | E430002D04Rik |
| 1455528_at   | 0.76046 | "Transcribed locus, weakly similar to NP_665733.1 Lipogenin [Rattus norvegicus]"                                 | ---           |
| 1455529_at   | 0.84857 | RIKEN cDNA 2700083E18 gene                                                                                       | 2700083E18Rik |
| 1455530_at   | 0.96113 | Immunoglobulin heavy chain 1a (serum IgG2a)                                                                      | Igh-1a        |
| 1455531_at   | 1.06564 | RIKEN cDNA A930031D07 gene                                                                                       | A930031D07Rik |
| 1455532_at   | 1.05475 | ataxin 7-like 2                                                                                                  | Atxn7l2       |
| 1455533_at   | 1.08677 | RIKEN cDNA A930025D01 gene                                                                                       | A930025D01Rik |
| 1455534_s_at | 0.94047 | oxysterol binding protein-like 11                                                                                | Osbpl11       |
| 1455535_at   | 0.85704 | RIKEN cDNA A730017D01 gene                                                                                       | A730017D01Rik |
| 1455536_at   | 0.97052 | RIKEN cDNA A630023A22 gene                                                                                       | A630023A22Rik |
| 1455537_at   | 0.92293 | RIKEN cDNA 6430547I21 gene                                                                                       | 6430547I21Rik |
| 1455538_at   | 1.08897 | RIKEN cDNA 6330403M23 gene                                                                                       | 6330403M23Rik |
| 1455539_at   | 1.03058 | ---                                                                                                              | ---           |
| 1455540_at   | 1.00972 | carbamoyl-phosphate synthetase 1                                                                                 | Cps1          |
| 1455541_a_at | 0.98173 | RIKEN cDNA 4430402I18 gene                                                                                       | 4430402I18Rik |
| 1455542_at   | 0.99696 | RIKEN cDNA C630043F03 gene                                                                                       | C630043F03Rik |

1455543\_at 0.96963 kelch-like 18 (Drosophila) Klhl18  
1455544\_at 0.83375 "zinc finger, RAN-binding domain containing 3" Zranb3  
1455545\_at 0.96501 RIKEN cDNA 1110065P20 gene 1110065P20Rik  
1455546\_s\_at 1.01685 "splicing factor 3a, subunit 2" Sf3a2  
1455547\_at 0.90018 zinc finger CCCH type containing 7B Zc3h7b  
1455548\_at 0.85663 "discs, large homolog-associated protein 4 (Drosophila)" Dlgap4  
1455549\_at 0.97985 SEC14 and spectrin domains 1 Sestd1  
1455550\_x\_at 0.86547 serine incorporator 3 Serinc3  
1455551\_at 0.98458 UEV and lactate/malate dehydrogenase domains Uevld  
1455552\_at 1.07715 "small nuclear RNA activating complex, polypeptide 4" Snapc4  
1455553\_at 0.87971 RIKEN cDNA 5330401P04 gene 5330401P04Rik  
1455554\_at 0.87285 RIKEN cDNA A830039N20 gene A830039N20Rik  
1455555\_at 0.94071 Expressed sequence AV071699 AV071699  
1455556\_at 0.96966 Notch gene homolog 2 (Drosophila) Notch2  
1455557\_at 1.06028 hypothetical LOC553095 LOC553095  
1455558\_at 0.78575 "gene model 114, (NCBI)" Gm114  
1455559\_at 1.07978 RIKEN cDNA E330039K12 gene E330039K12Rik  
1455560\_at 0.98511 Zinc finger protein 653 Zfp653  
1455561\_at 0.97272 carnosine dipeptidase 1 (metallopeptidase M20 family) Cndp1  
1455562\_at 0.99446 SRY-box containing gene 12 Sox12  
1455563\_at 1.01923 DEAD (Asp-Glu-Ala-Asp) box polypeptide 49 Ddx49  
1455564\_at 1.07734 breakpoint cluster region homolog Bcr  
1455565\_at 1.52752 B-cell CLL/lymphoma 9 Bcl9  
1455566\_s\_at 1.04494 RIKEN cDNA 2810022L02 gene 2810022L02Rik  
1455567\_at 1.11819 "Cdc2-related kinase, arginine/serine-rich" Crkrs  
1455568\_at 0.96717 RIKEN cDNA 2310015A05 gene 2310015A05Rik  
1455569\_at 0.88527 CDNA clone IMAGE:1548559 ---  
1455570\_x\_at 0.84680 "calponin 3, acidic" Cnn3  
1455571\_x\_at 1.03802 calmodulin 1 Calm1  
1455572\_x\_at 1.04764 ribosomal protein S18 Rps18  
1455573\_at 0.86559 keratin 14 Krt14  
1455574\_at 1.05071 "Smg-7 homolog, nonsense mediated mRNA decay factor (C. elegans)"  
Smg7  
1455575\_at 0.91472 eukaryotic translation initiation factor 4E binding protein 2 Eif4ebp2  
1455576\_at 0.78650 RIKEN cDNA 5830482F20 gene 5830482F20Rik  
1455577\_at 1.08250 Chemokine (C-C motif) ligand 28 Ccl28  
1455578\_x\_at 1.01234 ribosomal protein L41 Rpl41  
1455579\_at 1.03028 casein alpha s2-like A Csn1s2a  
1455580\_at 1.10026 USP6 N-terminal like Usp6nl  
1455581\_x\_at 0.87826 hypothetical protein 9530028C05 9530028C05  
1455582\_at 0.65954 Transcribed locus ---  
1455583\_at 0.87719 glucosamine Gne  
1455584\_at 0.86342 stromal cell derived factor 4 Sdf4



1455585\_at 1.00098 ring finger protein 168 Rnf168  
1455586\_at 0.93550 ring finger protein 168 Rnf168  
1455587\_at 0.94250 cDNA sequence BC030183 BC030183  
1455588\_at 0.82238 cDNA sequence BC034664 BC034664  
1455589\_at 1.00595 RIKEN cDNA 1700100M05 gene 1700100M05Rik  
1455590\_at 1.03564 "NAD(P)H dehydrogenase, quinone 2" Nqo2  
1455591\_at 0.98923 --- ---  
1455592\_at 1.01603 "vang-like 2 (van gogh, Drosophila)" Vangl2  
1455593\_at 1.09198 apolipoprotein B Apob  
1455594\_at 0.78637 exocyst complex component 3 Exoc3  
1455595\_at 0.73327 "UDP glucuronosyltransferase 2 family, polypeptide B36" Ugt2b36  
1455596\_a\_at 1.02409 cDNA sequence BC029214 BC029214  
1455597\_at 1.00540 Expressed sequence AI585793 AI585793  
1455598\_at 0.94041 ubiquitin specific peptidase 30 Usp30  
1455599\_at 0.91816 glucose-fructose oxidoreductase domain containing 1 Gfod1  
1455600\_at 1.16324 ribosomal protein S3 Rps3  
1455601\_at 0.99491 "0 day neonate thymus cDNA, RIKEN full-length enriched library, clone:  
A430079C03 product:unclassifiable, full insert sequence" ---  
1455602\_x\_at 0.83484 RIKEN cDNA 1110028C15 gene 1110028C15Rik  
1455603\_at 0.86850 Transcribed locus ---  
1455604\_at 0.68628 frizzled homolog 5 (Drosophila) Fzd5  
1455605\_at 1.16000 RUN and FYVE domain containing 3 Rufy3  
1455606\_at 0.96186 cDNA sequence BC004022 BC004022  
1455607\_at 0.97880 R-spondin 3 homolog (Xenopus laevis) Rspo3  
1455608\_at 0.95452 sodium channel and clathrin linker 1 Sclt1  
1455609\_at 0.94193 RIKEN cDNA C030025P15 gene C030025P15Rik  
1455610\_at 0.81465 desmuslin Dmn  
1455611\_at 0.82386 protein inhibitor of activated STAT 1 Pias1  
1455612\_at 0.84629 expressed sequence AI848218 AI848218  
1455613\_at 0.85542 RIKEN cDNA E130308A19 gene E130308A19Rik  
1455614\_at 0.90891 translocase of outer mitochondrial membrane 40 homolog-like (yeast)  
Tomm40l  
1455615\_at 1.02578 chemokine-like factor Cklf  
1455616\_at 1.30950 expressed sequence AI586002 AI586002  
1455617\_at 0.88928 LMBR1 domain containing 1 Lmbrd1  
1455618\_x\_at 0.95013 tetraspanin 33 Tspan33  
1455619\_at 1.04978 cDNA sequence BC062258 BC062258  
1455620\_at 0.89637 "PREDICTED: Mus musculus similar to heparan sulfate D-glucosaminyl 3-O-  
sulfotransferase 4 (LOC628805), mRNA" ---  
1455621\_at 0.94952 cDNA sequence BC066107 BC066107  
1455622\_at 1.03933 podocalyxin-like 2 Podxl2  
1455623\_at 0.86013 RIKEN cDNA A930031D07 gene A930031D07Rik  
1455624\_at 0.96053 --- ---

|              |         |                                                                                                                                       |                                     |  |
|--------------|---------|---------------------------------------------------------------------------------------------------------------------------------------|-------------------------------------|--|
| 1455625_at   | 0.78053 | ---                                                                                                                                   | ---                                 |  |
| 1455626_at   | 0.92855 | homeo box A9                                                                                                                          | Hoxa9                               |  |
| 1455627_at   | 1.19361 | "procollagen, type VIII, alpha 1"                                                                                                     | Col8a1                              |  |
| 1455628_at   | 1.04061 | RIKEN cDNA 6430543G08 gene                                                                                                            | 6430543G08Rik                       |  |
| 1455629_at   | 0.96510 | dopamine receptor D1A                                                                                                                 | Drd1a                               |  |
| 1455630_at   | 0.94470 | RIKEN cDNA 1700010H15 gene                                                                                                            | 1700010H15Rik                       |  |
| 1455631_at   | 0.91004 | histocompatibility 13                                                                                                                 | H13                                 |  |
| 1455632_at   | 0.96448 | "Guanine nucleotide binding protein, beta 5"                                                                                          | Gnb5                                |  |
| 1455633_at   | 0.79775 | zinc finger protein 647                                                                                                               | Zfp647                              |  |
| 1455634_at   | 0.94829 | ---                                                                                                                                   | ---                                 |  |
| 1455635_at   | 1.03277 | Transcribed locus                                                                                                                     | ---                                 |  |
| 1455636_at   | 0.95244 | limbic system-associated membrane protein                                                                                             | Lsamp                               |  |
| 1455637_x_at | 0.95984 | Similar to hypothetical protein FLJ38281                                                                                              | LOC245305                           |  |
| 1455638_at   | 0.72521 | zinc finger protein 319                                                                                                               | Zfp319                              |  |
| 1455639_at   | 0.95155 | Transcribed locus                                                                                                                     | ---                                 |  |
| 1455640_a_at | 0.95910 | thioredoxin 2                                                                                                                         | Txn2                                |  |
| 1455641_at   | 0.96640 | RIKEN cDNA 1600014C10 gene                                                                                                            | 1600014C10Rik                       |  |
| 1455642_a_at | 0.79109 | tetraspanin 17                                                                                                                        | Tspan17                             |  |
| 1455643_s_at | 1.10101 | "TSR1, 20S rRNA accumulation, homolog (yeast)"                                                                                        | Tsr1                                |  |
| 1455644_at   | 0.99148 | vacuolar protein sorting 53 (yeast)                                                                                                   | Vps53                               |  |
| 1455645_at   | 0.77983 | RIKEN cDNA 8030451F13 gene                                                                                                            | 8030451F13Rik                       |  |
| 1455646_at   | 0.79885 | RIKEN cDNA 2010004M13 gene                                                                                                            | 2010004M13Rik                       |  |
| 1455647_at   | 0.89341 | androgen receptor                                                                                                                     | Ar                                  |  |
| 1455648_at   | 1.02617 | similar to reduced expression 2                                                                                                       | /// similar to reduced expression 2 |  |
| LOC278757    | ///     | LOC631624                                                                                                                             |                                     |  |
| 1455649_at   | 0.83763 | tetratricopeptide repeat domain 9                                                                                                     | Ttc9                                |  |
| 1455650_at   | 0.91578 | Transcribed locus                                                                                                                     | ---                                 |  |
| 1455651_at   | 0.94271 | telomeric repeat binding factor 2                                                                                                     | Terf2                               |  |
| 1455652_at   | 0.99874 | expressed sequence AW124694                                                                                                           | AW124694                            |  |
| 1455653_at   | 0.96277 | cyclin J                                                                                                                              | Ccnj                                |  |
| 1455654_at   | 0.72903 | RIKEN cDNA 6430706D22 gene                                                                                                            | 6430706D22Rik                       |  |
| 1455655_a_at | 1.13314 | TAR DNA binding protein                                                                                                               | Tardbp                              |  |
| 1455656_at   | 0.96581 | B and T lymphocyte associated                                                                                                         | Btla                                |  |
| 1455657_at   | 1.17047 | RIKEN cDNA 2610207I05 gene                                                                                                            | 2610207I05Rik                       |  |
| 1455658_at   | 1.05510 | CGG triplet repeat binding protein 1                                                                                                  | Cggbp1                              |  |
| 1455659_at   | 1.01953 | ---                                                                                                                                   | ---                                 |  |
| 1455660_at   | 0.82685 | "colony stimulating factor 2 receptor, beta 1, low-affinity (granulocyte-macrophage)"                                                 | Csf2rb1                             |  |
| 1455661_at   | 1.04683 | "0 day neonate thymus cDNA, RIKEN full-length enriched library, clone: A430106B04 product:hypothetical protein, full insert sequence" | ---                                 |  |
| 1455662_x_at | 1.08266 | ribosomal protein S17                                                                                                                 | Rps17                               |  |
| 1455663_at   | 1.08959 | olfactomedin-like 1                                                                                                                   | Olfml1                              |  |
| 1455664_at   | 0.69246 | reticulon 4 receptor-like 1                                                                                                           | Rtn4rl1                             |  |

1455665\_at 1.01600 "LON peptidase N-terminal domain and ring finger 1 /// similar to CG32369-PB, isoform B" Lonrf1 /// LOC631639  
 1455666\_at 0.98713 RIKEN cDNA A030001O10 gene A230042K10Rik  
 1455667\_at 0.81312 prolactin regulatory element binding Preb  
 1455668\_at 0.96353 Wolf-Hirschhorn syndrome candidate 1-like 1 (human) Whsc111  
 1455669\_at 0.79039 WD repeat domain 19 Wdr19  
 1455670\_at 1.13472 "15 days embryo head cDNA, RIKEN full-length enriched library, clone: D930003N06 product:unclassifiable, full insert sequence" ---  
 1455671\_at 0.97713 COMM domain containing 8 Commd8  
 1455672\_s\_at 0.95948 complexin 2 Cplx2  
 1455673\_at 0.95856 "alkB, alkylation repair homolog 2 (E. coli)" Alkbh2  
 1455674\_at 1.04266 WD repeat domain 76 Wdr76  
 1455675\_a\_at 1.04279 Tial1 cytotoxic granule-associated RNA binding protein-like 1 Tial1  
 1455676\_x\_at 1.17334 Tial1 cytotoxic granule-associated RNA binding protein-like 1 Tial1  
 1455677\_s\_at 0.88758 chloride channel Ka /// similar to Chloride channel protein ClC-Ka (Chloride channel Ka) (ClC-K1) Clnka /// LOC639048  
 1455678\_at 0.94354 "sema domain, immunoglobulin domain (Ig), transmembrane domain (TM) and short cytoplasmic domain, (semaphorin) 4B" Sema4b  
 1455679\_at 0.89603 RIKEN cDNA 5830411E10 gene 5830411E10Rik  
 1455680\_at 1.03204 RIKEN cDNA 9630025H16 gene 9630025H16Rik  
 1455681\_at 0.92389 zinc finger protein 369 Zfp369  
 1455682\_at 1.19101 expressed sequence AA536808 AA536808  
 1455683\_a\_at 0.96075 "TBC1 domain family, member 8" Tbc1d8  
 1455684\_at 0.97933 mitogen-activated protein kinase kinase kinase 9 Map3k9  
 1455685\_at 1.14122 "microtubule associated monooxygenase, calponin and LIM domain containing 2" Mical2  
 1455686\_at 0.89003 --- ---  
 1455687\_at 0.91781 intestinal cell kinase Ick  
 1455688\_at 1.21062 "discoidin domain receptor family, member 2" Ddr2  
 1455689\_at 0.95864 frizzled homolog 10 (Drosophila) Fzd10  
 1455690\_at 0.94847 --- ---  
 1455691\_at 1.15968 "cytochrome P450, family 21, subfamily a, polypeptide 1" Cyp21a1  
 1455692\_x\_at 1.04083 RIKEN cDNA 1700097N02 gene 1700097N02Rik  
 1455693\_x\_at 1.06245 ribosomal protein S6 /// similar to 40S ribosomal protein S6 Rps6 /// LOC434404 /// LOC629575 /// LOC638497 /// LOC666577 /// LOC667739 /// LOC667922 /// LOC671306 /// LOC671432 /// LOC672192  
 1455694\_at 0.94606 neurobeachin-like 2 Nbeal2  
 1455695\_at 1.04816 "ST8 alpha-N-acetyl-neuraminide alpha-2,8-sialyltransferase 1" St8sia1  
 1455696\_a\_at 0.95835 PRP4 pre-mRNA processing factor 4 homolog B (yeast) Prpf4b  
 1455697\_at 0.98622 "PREDICTED: Mus musculus hypothetical protein LOC629064 (LOC629064),

mRNA" ---

1455698\_at 0.80135 translocation protein 1 Tloc1  
 1455699\_at 1.01769 Transcribed locus ---  
 1455700\_at 0.89214 MTERF domain containing 3 Mterfd3  
 1455701\_at 0.98025 sorting nexin 26 Snx26  
 1455702\_at 0.89611 --- ---  
 1455703\_at 0.89472 thymoma viral proto-oncogene 2 Akt2  
 1455704\_at 0.80201 X Kell blood group precursor related family member 8 homolog Xkr8  
 1455705\_at 0.96341 transmembrane protein 161A Tmem161a  
 1455706\_at 0.76581 syntaxin binding protein 4 Stxbp4  
 1455707\_at 1.04424 RIKEN cDNA C130037N17 gene C130037N17Rik  
 1455708\_at 0.96919 Tropomodulin 3 Tmod3  
 1455709\_at 1.80597 RIKEN cDNA 4930422I22 gene 4930422I22Rik  
 1455710\_x\_at 0.95107 mature T-cell proliferation 1 Mtcp1  
 1455711\_at 1.01019 deltex 4 homolog (Drosophila) Dtx4  
 1455712\_at 1.01932 "histone 3, H2a" Hist3h2a  
 1455713\_x\_at 1.09274 prohibitin 2 Phb2  
 1455714\_at 0.98047 "gene model 691, (NCBI)" Gm691  
 1455715\_at 0.79868 RIKEN cDNA 2610044O15 gene 2610044O15Rik  
 1455716\_at 1.12467 "Adult male corpora quadrigemina cDNA, RIKEN full-length enriched library, clone:B230342J21 product:unclassifiable, full insert sequence" ---  
 1455717\_s\_at 0.70313 dishevelled associated activator of morphogenesis 2 Daam2  
 1455718\_at 1.00556 spermatogenesis associated 21 Spata21  
 1455719\_at 0.94550 "tubulin, beta 5" Tubb5  
 1455720\_at 0.78439 "a disintegrin-like and metallopeptidase (reprolysin type) with thrombospondin type 1 motif, 2" Adamts2  
 1455721\_at 0.93403 G1 to S phase transition 2 Gspt2  
 1455722\_at 0.98252 --- ---  
 1455723\_at 0.84089 "DNA segment, Chr 1, ERATO Doi 448, expressed" D1Ertd448e  
 1455724\_at 0.88614 "2 days pregnant adult female oviduct cDNA, RIKEN full-length enriched library, clone:E230030F22 product:unclassifiable, full insert sequence" ---  
 1455725\_a\_at 1.03516 "H3 histone, family 3B" H3f3b  
 1455726\_at 1.08452 "gene model 71, (NCBI)" Gm71  
 1455727\_at 1.17829 "U2 small nuclear ribonucleoprotein auxiliary factor (U2AF) 1, related sequence 2" U2af1-rs2  
 1455728\_at 0.96609 phosphatase and tensin homolog Pten  
 1455729\_at 0.93388 "guanine nucleotide binding protein, alpha q polypeptide" Gnaq  
 1455730\_at 1.11216 "discs, large homolog 7 (Drosophila)" Dlg7  
 1455731\_at 0.90935 "solute carrier family 29 (nucleoside transporters), member 3" Slc29a3  
 1455732\_at 1.18208 RIKEN cDNA 1700025G04 gene 1700025G04Rik  
 1455733\_at 1.29616 TAO kinase 3 Taok3  
 1455734\_at 0.86800 cereblon Crbn  
 1455735\_at 0.97923 "adaptor-related protein complex AP-1, sigma 3" Ap1s3

1455736\_at 0.75139 "myosin binding protein C, fast-type" Mybpc2  
1455737\_at 0.88470 RIKEN cDNA C030002B11 gene C030002B11Rik  
1455738\_at 1.13063 coiled-coil domain containing 55 Ccdc55  
1455739\_at 0.84951 hypothetical protein 6430704N06 6430704N06  
1455740\_at 1.43844 heterogeneous nuclear ribonucleoprotein A1 Hnrpa1  
1455741\_a\_at 0.95895 endothelin converting enzyme 1 Ece1  
1455742\_x\_at 0.98487 mortality factor 4 like 1 /// RIKEN cDNA A730098P11 gene /// similar to  
mortality factor 4 like 1 /// similar to mortality factor 4 like 1 (predicted) Morf411 /// A730098P11Rik ///  
LOC627352 /// LOC635663  
1455743\_at 1.03670 olfactomedin-like 2A Olfml2a  
1455744\_at 1.26825 G protein-coupled receptor 178 Gpr178  
1455745\_at 0.92617 "ceroid-lipofuscinosis, neuronal 8" Cln8  
1455746\_at 0.86562 kinesin family member 13A Kif13a  
1455747\_at 1.00770 gamma-glutamyltransferase-like activity 1 Ggta1  
1455748\_at 0.88478 G protein-coupled receptor 178 Gpr178  
1455749\_x\_at 1.08255 "NADH dehydrogenase (ubiquinone) 1 alpha subcomplex, 7 (B14.5a)"  
Ndufa7  
1455750\_at 0.86733 cDNA sequence BC053994 BC053994  
1455751\_at 0.93700 cullin associated and neddylation disassociated 1 Cand1  
1455752\_a\_at 0.99880 transmembrane protein 134 Tmem134  
1455753\_at 1.07331 RIKEN cDNA C630035N08 gene C630035N08Rik  
1455754\_at 0.84919 LIM domain only 3 Lmo3  
1455755\_at 1.04305 "gene model 88, (NCBI)" Gm88  
1455756\_at 0.89409 RIKEN cDNA F730014I05 gene F730014I05Rik  
1455757\_at 1.00853 "DNA segment, Chr 3, ERATO Doi 254, expressed" D3Ertd254e  
1455758\_at 0.99947 "protein kinase C, gamma" Prkcc  
1455759\_a\_at 1.06500 ankyrin repeat and KH domain containing 1 Ankhd1  
1455760\_at 1.17448 "solute carrier family 9 (sodium/hydrogen exchanger), member 5" Slc9a5  
1455761\_at 1.06773 --- ---  
1455762\_at 0.97540 RIKEN cDNA C330002I19 gene C330002I19Rik  
1455763\_at 0.86850 ring finger protein 41 Rnf41  
1455764\_at 1.02181 RIKEN cDNA B930007L02 gene B930007L02Rik  
1455765\_a\_at 0.96429 "ATP-binding cassette, sub-family C (CFTR/MRP), member 8" Abcc8  
1455766\_at 0.87398 "gamma-aminobutyric acid (GABA-A) receptor, subunit alpha 1" Gabra1  
1455767\_x\_at 1.01224 ribosomal protein L21 Rpl21  
1455768\_at 0.92488 Niemann Pick type C2 Npc2  
1455769\_at 1.02672 "DCN1, defective in cullin neddylation 1, domain containing 5 (S. cerevisiae)"  
Dcun1d5  
1455770\_at 0.99737 Transcribed locus ---  
1455771\_at 0.98190 benzodiazapine receptor associated protein 1 Bzrap1  
1455772\_at 0.95183 progesterone receptor Pgr  
1455773\_at 1.54736 Phosphatidylinositol binding clathrin assembly protein Picalm  
1455774\_at 0.94604 Jun proto-oncogene related gene d1 Jund1

1455775\_at 0.95233 RIKEN cDNA 4932415D10 gene 4932415D10Rik  
1455776\_x\_at 0.97279 bolA-like 2 (E. coli) Bola2  
1455777\_x\_at 0.91033 hydroxysteroid (17-beta) dehydrogenase 4 Hsd17b4  
1455778\_at 0.83792 zinc finger protein 192 Zfp192  
1455779\_at 1.05916 Transcribed locus ---  
1455780\_at 0.90013 "tubulin tyrosine ligase-like family, member 6" Ttl6  
1455781\_at 0.78822 cDNA sequence BC027231 BC027231  
1455782\_at 1.10393 sterile alpha motif domain containing 7 Samd7  
1455783\_at 0.93206 --- ---  
1455784\_at 0.99664 secretory blood group 1 Sec1  
1455785\_at 1.04842 Transcribed locus ---  
1455786\_at 0.86715 RIKEN cDNA 2610036F08 gene 2610036F08Rik  
1455787\_x\_at 0.96420 multiple inositol polyphosphate histidine phosphatase 1 Minpp1  
1455788\_x\_at 0.98673 "Polymerase (DNA-directed), delta interacting protein 3" Poldip3  
1455789\_x\_at 0.99490 similar to heat shock protein 8 LOC621284  
1455790\_at 1.07304 E2F transcription factor 2 E2f2  
1455791\_at 0.98923 chromatin licensing and DNA replication factor 1 Cdt1  
1455792\_x\_at 1.06279 necdin Ndn  
1455793\_at 0.82356 cDNA sequence BC035537 BC035537  
1455794\_at 1.47815 RIKEN cDNA D130058I21 gene D130058I21Rik  
1455795\_at 0.84279 squamous cell carcinoma antigen recognized by T cells 2 Sart2  
1455796\_x\_at 0.85699 olfactomedin 1 Olfm1  
1455797\_x\_at 0.97284 ligatin Lgtn  
1455798\_at 1.16374 galactokinase 2 Galk2  
1455799\_at 0.85785 RAR-related orphan receptor beta Rorb  
1455800\_x\_at 1.05036 sorting and assembly machinery component 50 homolog (S. cerevisiae)  
Samm50  
1455801\_x\_at 1.04430 tubulin-specific chaperone d Tbcd  
1455802\_x\_at 1.04141 anterior gradient 2 (Xenopus laevis) Agr2  
1455803\_at 1.02284 "solute carrier organic anion transporter family, member 4a1" Slco4a1  
1455804\_x\_at 0.87370 3-oxoacid CoA transferase 1 Oxct1  
1455805\_x\_at 1.00247 coiled-coil domain containing 22 Ccdc22  
1455806\_x\_at 1.04002 "NADH dehydrogenase (ubiquinone) 1 alpha subcomplex, 12 /// similar to  
13kDa differentiation-associated protein" Ndufa12 /// LOC669626  
1455807\_at 1.07656 "testis-specific protein, Y-encoded-like 5" Tspyl5  
1455808\_at 0.95611 RIKEN cDNA 4922502D21 gene 4922502D21Rik  
1455809\_x\_at 0.99109 resistance to inhibitors of cholinesterase 8 homolog (C. elegans) Ric8  
1455810\_a\_at 0.89100 RIKEN cDNA E130112L23 gene /// similar to quattro E130112L23Rik ///  
LOC671456  
1455811\_at 0.98240 "eukaryotic translation initiation factor 3, subunit 6 interacting protein"  
Eif3s6ip  
1455812\_x\_at 0.77826 vasorin Vasn  
1455813\_at 0.97430 similar to oogenesis MGC91194

1455814\_x\_at 1.11228 DEAD (Asp-Glu-Ala-Asp) box polypeptide 39 Ddx39  
1455815\_a\_at 0.87928 "tyrosine 3-monooxygenase/tryptophan 5-monooxygenase activation protein, beta polypeptide" Ywhab  
1455816\_a\_at 0.96485 potassium channel tetramerisation domain containing 3 Kctd3  
1455817\_x\_at 0.97653 similar to Zinc finger X-linked protein ZXDB LOC668166  
1455818\_at 1.02311 RIKEN cDNA 4930427A07 gene 4930427A07Rik  
1455819\_at 0.94482 ROD1 regulator of differentiation 1 (S. pombe) Rod1  
1455820\_x\_at 0.98819 "scavenger receptor class B, member 1" Scarb1  
1455821\_x\_at 1.03618 "complement component 1, q subcomponent binding protein" C1qbp  
1455822\_x\_at 1.04470 surfeit gene 4 Surf4  
1455823\_at 0.91320 Bardet-Biedl syndrome 4 homolog (human) Bbs4  
1455824\_x\_at 1.07583 "STT3, subunit of the oligosaccharyltransferase complex, homolog A (S. cerevisiae)" Stt3a  
1455825\_s\_at 0.86820 ligand of numb-protein X 1 Lnx1  
1455826\_a\_at 0.93001 beta-site APP cleaving enzyme 1 Bace1  
1455827\_at 1.02915 muscleblind-like 2 Mbnl2  
1455828\_at 0.91132 G protein-regulated inducer of neurite outgrowth 1 Gprin1  
1455829\_at 1.05788 ubiquitin specific peptidase 14 Usp14  
1455830\_s\_at 1.03008 expressed sequence C87414 /// similar to PRAME family member 9 /// similar to PRAME family member 9 C87414 /// LOC664950 /// LOC665592  
1455831\_at 2.08452 "fusion, derived from t(12;16) malignant liposarcoma (human)" Fus  
1455832\_a\_at 1.09826 uridine monophosphate synthetase Umps  
1455833\_at 1.01127 expressed sequence AU041783 AU041783  
1455834\_x\_at 1.19828 "transforming, acidic coiled-coil containing protein 3" Tacc3  
1455835\_at 0.94885 Ribosomal protein S16 Rps16  
1455836\_at 1.00691 poly (A) polymerase alpha Papola  
1455837\_at 1.06146 tripartite motif-containing 36 Trim36  
1455838\_at 0.84329 schlafen like 1 Slfn1  
1455839\_at 1.01853 UDP-glucose ceramide glucosyltransferase-like 1 Ugcgl1  
1455840\_at 0.62781 Rap guanine nucleotide exchange factor (GEF) 5 Rapgef5  
1455841\_s\_at 0.95799 glutamate-rich WD repeat containing 1 Grwd1  
1455842\_x\_at 0.95118 ubiquitin specific peptidase 15 Usp15  
1455843\_at 0.79360 fucosyltransferase 4 Fut4  
1455844\_at 0.87506 Cdk5 and Abl enzyme substrate 1 Cables1  
1455845\_at 0.92941 cDNA sequence BC030477 BC030477  
1455846\_at 0.88467 aquaporin 11 Aqp11  
1455847\_at 0.97935 p21 (CDKN1A)-activated kinase 7 Pak7  
1455848\_at 1.06635 "transmembrane protease, serine 11a" Tmprss11a  
1455849\_at 0.98086 --- ---  
1455850\_at 0.97904 RIKEN cDNA 2310003H01 gene 2310003H01Rik  
1455851\_at 1.00487 bone morphogenetic protein 5 Bmp5  
1455852\_at 1.13869 RIKEN cDNA 4833432M17 gene 4833432M17Rik  
1455853\_x\_at 0.82707 tetraspanin 31 Tspan31

1455854\_a\_at 1.03530 slingshot homolog 1 (Drosophila) Ssh1  
1455855\_x\_at 0.96703 heterogeneous nuclear ribonucleoprotein A/B Hnrpab  
1455856\_at 0.95279 --- ---  
1455857\_a\_at 0.95821 "RAB2B, member RAS oncogene family" Rab2b  
1455858\_x\_at 1.03262 pro-opiomelanocortin-alpha Pomc1  
1455859\_at 1.69998 RIKEN cDNA A330021E22 gene A330021E22Rik  
1455860\_at 0.96868 "phosphatidylinositol glycan anchor biosynthesis, class H" Pigh  
1455861\_at 1.07638 erythrocyte protein band 4.1-like 5 Epb4.115  
1455862\_at 1.05548 RIKEN cDNA 9630054F20 gene 9630054F20Rik  
1455863\_at 0.98134 spermatogenesis associated 5-like 1 Spata51  
1455864\_at 1.01536 tripartite motif-containing 75 Trim75  
1455865\_at 0.94695 insulinoma-associated 1 Insm1  
1455866\_x\_at 1.11748 thioredoxin-like 1 Txnl1  
1455867\_at 0.73941 SRY-box containing gene 4 Sox4  
1455868\_a\_at 0.87431 "tubulin, gamma complex associated protein 2" Tubgcp2  
1455869\_at 1.01068 "Calcium/calmodulin-dependent protein kinase II, beta" Camk2b  
1455870\_at 0.99505 A kinase (PRKA) anchor protein 2 Akap2  
1455871\_s\_at 0.80785 Tax1 (human T-cell leukemia virus type I) binding protein 3 /// ribosomal  
protein L13 Tax1bp3 /// Rp113  
1455872\_at 0.74457 cDNA sequence BC065085 BC065085  
1455873\_a\_at 0.99725 vacuolar protein sorting 18 (yeast) Vps18  
1455874\_at 0.91031 RIKEN cDNA 1810059G22 gene 1810059G22Rik  
1455875\_x\_at 0.88956 transmembrane 9 superfamily member 2 Tm9sf2  
1455876\_at 1.21074 "solute carrier family 4, sodium bicarbonate cotransporter, member 7" Slc4a7  
1455877\_a\_at 0.99721 nanos homolog 1 (Drosophila) Nanos1  
1455878\_at 1.18829 RIKEN cDNA 2700023E23 gene 2700023E23Rik  
1455879\_at 0.87014 GCN1 general control of amino-acid synthesis 1-like 1 (yeast) Gcn111  
1455880\_s\_at 1.00562 "beclin 1 (coiled-coil, myosin-like BCL2-interacting protein)" Becn1  
1455881\_at 0.87482 immediate early response 5-like Ier51  
1455882\_x\_at 0.92414 von Willebrand factor C domain containing 2 Vwc2  
1455883\_a\_at 0.97122 leucine rich repeat transmembrane neuronal 1 Lrrtm1  
1455884\_at 0.88478 dipeptidylpeptidase 9 Dpp9  
1455885\_at 0.84917 RIKEN cDNA 6530401C20 gene 6530401C20Rik  
1455886\_at 1.08597 Casitas B-lineage lymphoma Cbl  
1455887\_at 0.95246 "asparagine-linked glycosylation 8 homolog (yeast, alpha-1,3-  
glucosyltransferase)" Alg8  
1455888\_at 0.80566 leucine rich repeat neuronal 6C Lrrn6c  
1455889\_at 1.07690 male sterility domain containing 1 Mlstd1  
1455890\_x\_at 0.94886 small nuclear ribonucleoprotein N /// similar to small nuclear  
ribonucleoparticle-associated protein Snrpn /// LOC545062  
1455891\_at 0.91200 RIKEN cDNA 4933425K02 gene 4933425K02Rik  
1455892\_x\_at 0.97721 similar to melanoma antigen /// similar to melanoma antigen /// similar to  
melanoma antigen /// similar to melanoma antigen /// similar to melanoma antigen /// similar to



melanoma antigen /// similar to melanoma antigen      LOC622147 /// LOC668227 /// LOC668269 ///  
 LOC669176 /// LOC669658 /// LOC669821 /// LOC676636  
 1455893\_at    1.06414 R-spondin 2 homolog (*Xenopus laevis*)    Rspo2  
 1455894\_at    0.92968 peptidyl-tRNA hydrolase 2      Ptrh2  
 1455895\_x\_at    1.08123 RIKEN cDNA 1110012M11 gene    1110012M11Rik  
 1455896\_a\_at    0.97982 "potassium channel, subfamily K, member 1"    Kcnk1  
 1455897\_x\_at    0.99372 high mobility group nucleosomal binding domain 1    Hmgn1  
 1455898\_x\_at    0.86554 "solute carrier family 2 (facilitated glucose transporter), member 3"    Slc2a3  
 1455899\_x\_at    0.96412 suppressor of cytokine signaling 3    Socs3  
 1455900\_x\_at    0.94918 "transglutaminase 2, C polypeptide"    Tgm2  
 1455901\_at    0.84902 choline phosphotransferase 1    Chpt1  
 1455902\_x\_at    0.99213 "Ras homolog gene family, member f"    Rhof  
 1455903\_at    0.90417 "TBC1 domain family, member 4"    Tbc1d4  
 1455904\_at    1.13409 growth arrest specific 5      Gas5  
 1455905\_at    0.94934 RIKEN cDNA 2610507B11 gene    2610507B11Rik  
 1455906\_at    0.78998 RIKEN cDNA 6030446N20 gene    6030446N20Rik  
 1455907\_x\_at    0.98073 paired-like homeobox 2b Phox2b  
 1455908\_a\_at    0.97019 serine carboxypeptidase 1      Scpep1  
 1455909\_at    1.14309 RIKEN cDNA 9530002K18 gene    9530002K18Rik  
 1455910\_at    0.97810 kelch domain containing 3      Klhdc3  
 1455911\_x\_at    0.91768 "NADH dehydrogenase (ubiquinone) 1 beta subcomplex, 11"    Ndufb11  
 1455912\_x\_at    0.86989 Unc-45 homolog A (*C. elegans*)    Unc45a  
 1455913\_x\_at    0.80215 transthyretin    Ttr  
 1455914\_at    0.89401 expressed sequence AI987944    AI987944  
 1455915\_at    0.82637 UDP-N-acetyl-alpha-D-galactosamine:polypeptide N-  
 acetylgalactosaminyltransferase 4      Galnt4  
 1455916\_at    1.10014 expressed sequence AI931714    AI931714  
 1455917\_at    0.94258 "neurotrophic tyrosine kinase, receptor, type 3"    Ntrk3  
 1455918\_at    1.07105 "adrenergic receptor, beta 3"    Adrb3  
 1455919\_at    1.00308 "Gene model 879, (NCBI)"      Gm879  
 1455920\_x\_at    1.13892 lysozyme-like 6    Lyzl6  
 1455921\_at    0.95538 Transcribed locus      ---  
 1455922\_at    0.98225 RAB3 GTPase activating protein subunit 1      Rab3gap1  
 1455923\_at    0.90082 potassium channel tetramerisation domain containing 8    Kctd8  
 1455924\_at    0.87381 "RAB6B, member RAS oncogene family"    Rab6b  
 1455925\_at    0.99535 PR domain containing 8    Prdm8  
 1455926\_at    0.94114 "LSM6 homolog, U6 small nuclear RNA associated (*S. cerevisiae*)"    Lsm6  
 1455927\_x\_at    1.01130 ---      ---  
 1455928\_x\_at    0.84063 "leucine-zipper-like transcriptional regulator, 1"    Lztr1  
 1455929\_x\_at    0.93260 "protein phosphatase 2 (formerly 2A), regulatory subunit A (PR 65), alpha  
 isoform"    Ppp2r1a  
 1455930\_at    0.76991 hypothetical protein LOC673503    LOC673503  
 1455931\_at    1.05289 "cholinergic receptor, nicotinic, alpha polypeptide 3"    Chrna3

|              |         |                                                                            |               |  |
|--------------|---------|----------------------------------------------------------------------------|---------------|--|
| 1455932_at   | 0.95177 | Metadherin                                                                 | Mtdh          |  |
| 1455933_at   | 1.26851 | transformer 2 alpha homolog (Drosophila)                                   | Tra2a         |  |
| 1455934_at   | 0.92420 | "NADH dehydrogenase (ubiquinone) 1 beta subcomplex, 9"                     | Ndufb9        |  |
| 1455935_at   | 0.93843 | RIKEN cDNA 2410131K14 gene                                                 | 2410131K14Rik |  |
| 1455936_a_at | 0.92929 | RNA binding protein gene with multiple splicing                            | Rbpms         |  |
| 1455937_at   | 1.03451 | leucine rich repeat transmembrane neuronal 4                               | Lrrtm4        |  |
| 1455938_x_at | 0.98275 | RAD21 homolog (S. pombe)                                                   | Rad21         |  |
| 1455939_x_at | 0.93780 | signal recognition particle 14                                             | Srp14         |  |
| 1455940_x_at | 0.88068 | WD repeat domain 6                                                         | Wdr6          |  |
| 1455941_s_at | 0.95059 | mitogen activated protein kinase kinase 5                                  | Map2k5        |  |
| 1455942_at   | 1.10462 | F-box and leucine-rich repeat protein 11                                   | Fbxl11        |  |
| 1455943_at   | 1.01393 | zinc finger protein 451                                                    | Zfp451        |  |
| 1455944_at   | 0.93130 | zinc finger protein 516                                                    | Zfp516        |  |
| 1455945_at   | 0.94329 | RIKEN cDNA A530094I17 gene                                                 | A530094I17Rik |  |
| 1455946_x_at | 1.03560 | "thymosin, beta 10"                                                        | Tmsb10        |  |
| 1455947_at   | 0.94802 | cDNA sequence AK162044                                                     | AK162044      |  |
| 1455948_x_at | 1.03558 | matrilin 3                                                                 | Matn3         |  |
| 1455949_at   | 0.89920 | "ATPase, Na <sup>+</sup> /K <sup>+</sup> transporting, beta 1 polypeptide" | Atp1b1        |  |
| 1455950_x_at | 1.01124 | ribosomal protein L35                                                      | Rpl35         |  |
| 1455951_at   | 1.11440 | methionine-tRNA synthetase                                                 | Mars          |  |
| 1455952_at   | 0.93804 | ADP-ribosylhydrolase like 1                                                | Adprh1        |  |
| 1455953_x_at | 1.10029 | phosphoseryl-tRNA kinase                                                   | Pstk          |  |
| 1455954_x_at | 0.87599 | GPI anchor attachment protein 1                                            | Gpaal         |  |
| 1455955_s_at | 0.96724 | sorting nexin 17                                                           | Snx17         |  |
| 1455956_x_at | 1.03728 | cyclin D2                                                                  | Ccnd2         |  |
| 1455957_x_at | 0.94791 | CEA-related cell adhesion molecule 11                                      | Ceacam11      |  |
| 1455958_s_at | 1.13629 | PTC7 protein phosphatase homolog (S. cerevisiae)                           | Pptc7         |  |
| 1455959_s_at | 0.89723 | ---                                                                        | ---           |  |
| 1455960_at   | 0.88712 | multiple EGF-like-domains 9                                                | Megf9         |  |
| 1455961_at   | 0.80409 | ---                                                                        | ---           |  |
| 1455962_at   | 1.06054 | hedgehog acyltransferase                                                   | Hhat          |  |
| 1455963_at   | 0.91673 | RIKEN cDNA 6332401O19 gene                                                 | 6332401O19Rik |  |
| 1455964_at   | 1.07635 | "Cdc2-related kinase, arginine/serine-rich"                                | Crkrs         |  |
| 1455965_at   | 1.08417 | ---                                                                        | ---           |  |
| 1455966_s_at | 0.91970 | nudix (nucleoside diphosphate linked moiety X)-type motif 21               | Nudt21        |  |
| 1455967_at   | 1.00424 | sorbin and SH3 domain containing 1                                         | Sorbs1        |  |
| 1455968_x_at | 0.96392 | transmembrane emp24 domain trafficking protein 2                           | Tmed2         |  |
| 1455969_at   | 1.05877 | nudix (nucleoside diphosphate linked moiety X)-type motif 15               | Nudt15        |  |
| 1455970_at   | 0.79581 | "Phosphodiesterase 5A, cGMP-specific"                                      | Pde5a         |  |
| 1455971_at   | 0.92926 | RIKEN cDNA 2810032E02 gene                                                 | 2810032E02Rik |  |
| 1455972_x_at | 0.87639 | "L-3-hydroxyacyl-Coenzyme A dehydrogenase, short chain"                    | Hadhsc        |  |
| 1455973_at   | 1.02762 | hypothetical protein LOC626870                                             | RP23-219P13.3 |  |
| 1455974_at   | 1.01549 | RIKEN cDNA 1110049F12 gene                                                 | 1110049F12Rik |  |

1455975\_x\_at 1.01564 zinc finger protein 313 Zfp313  
1455976\_x\_at 1.16964 diazepam binding inhibitor Dbi  
1455977\_x\_at 0.94243 kallikrein 1 /// kallikrein 1-related peptidase b5 Klk1 /// Klk1b5  
1455978\_a\_at 1.02183 matrilin 2 Matn2  
1455979\_at 0.92891 AT rich interactive domain 1B (Swi1 like) Arid1b  
1455980\_a\_at 1.54129 growth arrest-specific 2 like 3 Gas2l3  
1455981\_at 1.03152 ribosomal protein S6 /// similar to 40S ribosomal protein S6 /// similar to 40S  
ribosomal protein S6 /// similar to 40S ribosomal protein S6 /// similar to 40S ribosomal protein S6 ///  
similar to 40S ribosomal protein S6 /// similar to 40S ribosomal protein S6 /// similar to 40S ribosomal  
protein S6 /// similar to 40S ribosomal protein S6 /// similar to 40S ribosomal protein S6 /// similar to  
40S ribosomal protein S6 /// similar to 40S ribosomal protein S6 /// similar to 40S ribosomal protein  
S6 /// similar to 40S ribosomal protein S6 /// similar to 40S ribosomal protein S6 /// similar to 40S  
ribosomal protein S6 Rps6 /// LOC214738 /// LOC384383 /// LOC545640 /// LOC626259 ///  
LOC629575 /// LOC638497 /// LOC639593 /// LOC639750 /// LOC666577 /// LOC667739 ///  
LOC667922 /// LOC671306 /// LOC671432 /// LOC672620 /// LOC675985  
1455982\_at 0.98159 jumonji domain containing 4 Jmjd4  
1455983\_at 0.99546 cell division cycle associated 2 Cdca2  
1455984\_at 0.98708 retinoic acid induced 17 Rai17  
1455985\_x\_at 1.02570 serine hydroxymethyl transferase 2 (mitochondrial) Shmt2  
1455986\_at 0.91178 "zinc finger, DHHC domain containing 17" Zdhhc17  
1455987\_at 1.22334 Sec61 alpha 1 subunit (S. cerevisiae) Sec61a1  
1455988\_a\_at 1.00525 chaperonin subunit 6a (zeta) Cct6a  
1455989\_at 1.21042 gap junction membrane channel protein alpha 12 Gja12  
1455990\_at 1.06651 kinesin family member 23 Kif23  
1455991\_at 1.10351 cysteine conjugate-beta lyase 2 Ccbl2  
1455992\_at 0.83553 vestigial like 4 (Drosophila) Vgll4  
1455993\_at 0.77371 --- ---  
1455994\_x\_at 1.13111 "elongation of very long chain fatty acids (FEN1/Elo2, SUR4/Elo3, yeast)-like  
1" Elovl1  
1455995\_at 0.90150 "DNA segment, Chr 10, Brigham & Women's Genetics 1379 expressed"  
D10Bwg1379e  
1455996\_x\_at 1.01106 proline-rich acidic protein 1 Prap1  
1455997\_a\_at 0.89810 ubiquinol-cytochrome c reductase binding protein Uqcrb  
1455998\_at 1.17462 similar to Zinc finger BED domain containing protein 4 /// similar to Zinc finger  
BED domain containing protein 4 /// similar to Zinc finger BED domain containing protein 4  
LOC667118 /// LOC669797 /// LOC675760  
1455999\_at 0.98148 RIKEN cDNA C330003B14 gene C330003B14Rik  
1456000\_at 1.02769 DEAD (Asp-Glu-Ala-Asp) box polypeptide 18 Ddx18  
1456001\_at 0.93197 similar to late cornified envelope protein LOC545548  
1456002\_at 1.00735 "xeroderma pigmentosum, complementation group A" Xpa  
1456003\_a\_at 0.92136 "solute carrier family 1 (glutamate/neutral amino acid transporter), member 4"  
Slc1a4  
1456004\_x\_at 1.00616 islet amyloid polypeptide Iapp

1456005\_a\_at 0.80579 BCL2-like 11 (apoptosis facilitator) Bcl2l11  
1456006\_at 0.87188 BCL2-like 11 (apoptosis facilitator) Bcl2l11  
1456007\_at 0.95216 ADP-ribosylation factor 3 Arf3  
1456008\_at 0.79718 "leucine rich repeat containing 8 family, member E" Lrrc8e  
1456009\_x\_at 1.00202 topoisomerase (DNA) III beta Top3b  
1456010\_x\_at 0.96659 hairy and enhancer of split 5 (Drosophila) Hes5  
1456011\_x\_at 0.90933 acetyl-Coenzyme A acyltransferase 1A Acaa1a  
1456012\_x\_at 0.99404 ribonuclease T2 Rnaset2  
1456013\_x\_at 0.83745 "solute carrier family 35, member A4" Slc35a4  
1456014\_s\_at 1.05475 cDNA sequence BC032204 BC032204  
1456015\_x\_at 0.92660 NADH dehydrogenase (ubiquinone) flavoprotein 1 Ndufv1  
1456016\_x\_at 0.87082 CDNA sequence BC005624 BC005624  
1456017\_x\_at 1.02587 similar to oocyte specific homeobox 2 LOC666466  
1456018\_at 1.00540 expressed sequence AL022779 AL022779  
1456019\_at 0.93490 "CWF19-like 2, cell cycle control (S. pombe)" Cwf19l2  
1456020\_at 0.99318 SH3 domain and tetratricopeptide repeats 2 Sh3tc2  
1456021\_at 0.95956 activating transcription factor 6 Atf6  
1456022\_at 0.73438 homeodomain interacting protein kinase 2 Hipk2  
1456023\_at 0.93863 RIKEN cDNA 2210010B09 gene 2210010B09Rik  
1456024\_at 0.90632 general transcription factor III C 1 Gtf3c1  
1456025\_at 0.82695 doublecortin and CaM kinase-like 2 Dcamk12  
1456026\_at 0.86551 RIKEN cDNA 8030451K01 gene 8030451K01Rik  
1456027\_at 1.01867 RNA binding motif protein 41 Rbm41  
1456028\_x\_at 1.05070 Myristoylated alanine rich protein kinase C substrate Marcks  
1456029\_a\_at 1.04673 tetratricopeptide repeat domain 7B Ttc7b  
1456030\_at 0.97330 Kruppel-like factor 13 Klf13  
1456031\_at 0.86526 "Tubulin, beta 2c" Tubb2c  
1456032\_x\_at 1.02308 "H2A histone family, member Z /// similar to H2A histone family, member Z /// similar to H2A histone family, member Z" H2afz /// LOC666634 /// LOC675899  
1456033\_at 0.87596 T-box 4 Tbx4  
1456034\_at 1.03030 tetratricopeptide repeat domain 18 Ttc18  
1456035\_at 0.99867 nuclear RNA export factor 3 Nxf3  
1456036\_x\_at 1.21144 glutathione S-transferase omega 1 Gsto1  
1456037\_x\_at 1.01273 prolactin regulatory element binding Preb  
1456038\_at 1.08321 F-box and leucine-rich repeat protein 4 Fbxl4  
1456039\_at 0.91909 sorting nexin 14 Snx14  
1456040\_at 0.98059 "splicing factor 3b, subunit 2" Sf3b2  
1456041\_at 0.94716 sorting nexin 16 Snx16  
1456042\_s\_at 1.01739 "Crm, cramped-like (Drosophila)" Cramp11  
1456043\_at 0.90537 ubiquitin specific peptidase 22 Usp22  
1456044\_at 1.09880 "neural precursor cell expressed, developmentally down-regulated gene 4-like" Nedd4l  
1456045\_at 0.82612 RIKEN cDNA 1700106N22 gene 1700106N22Rik

1456046\_at 0.93662 CD93 antigen Cd93  
1456047\_at 1.01817 "phospholipase A2, group IVB (cytosolic)" Pla2g4b  
1456048\_at 0.96735 cytoplasmic polyadenylation element binding protein 3 Cpeb3  
1456049\_at 1.20783 v-ral simian leukemia viral oncogene homolog A (ras related) Rala  
1456050\_at 1.24387 expressed sequence C80998 C80998  
1456051\_at 1.05946 dopamine receptor D1A Drd1a  
1456052\_at 0.93430 cyclin-dependent kinase-like 3 Cdkl3  
1456053\_at 0.98566 Transcribed locus ---  
1456054\_a\_at 1.02469 pumilio 1 (Drosophila) Pum1  
1456055\_x\_at 0.97680 "polymerase (DNA directed), delta 1, catalytic subunit" Pold1  
1456056\_a\_at 1.05138 "DNA segment, Chr 6, Wayne State University 116, expressed" D6Wsu116e  
1456057\_x\_at 0.94097 transmembrane protein 109 Tmem109  
1456058\_at 1.04405 RNA binding motif protein 27 Rbm27  
1456059\_at 1.08944 "proteasome (prosome, macropain) 26S subunit, non-ATPase, 11" Psmd11  
1456060\_at 0.72710 avian musculoaponeurotic fibrosarcoma (v-maf) AS42 oncogene homolog  
Maf  
1456061\_at 1.05331 "GTPase, IMAP family member 8" Gimap8  
1456062\_at 1.04865 natriuretic peptide precursor type A Nppa  
1456063\_at 0.79481 open reading frame 34 ORF34  
1456064\_at 1.07429 expressed sequence AI504432 AI504432  
1456065\_at 0.92869 "ubiquitin associated and SH3 domain containing, A" Ubash3a  
1456066\_a\_at 1.29038 RNA polymerase 1-4 Rpo1-4  
1456067\_at 1.03975 GLI-Kruppel family member GLI3 Gli3  
1456068\_at 1.04124 neurofascin Nfasc  
1456069\_at 1.13218 dystrobrevin alpha Dtna  
1456070\_at 1.03077 RIKEN cDNA 5430405N12 gene 5430405N12Rik  
1456071\_a\_at 0.95907 "cytochrome c, somatic /// similar to Cytochrome c, somatic /// similar to  
Cytochrome c, somatic" Cyps /// LOC670717 /// LOC672195  
1456072\_at 1.16365 "protein phosphatase 1, regulatory (inhibitor) subunit 9A" Ppp1r9a  
1456073\_s\_at 1.14435 pannexin 3 Panx3  
1456074\_at 1.05239 orphan short chain dehydrogenase/reductase Sdro  
1456075\_at 1.00163 protein kinase D2 Prkd2  
1456076\_at 0.98335 defensin beta 19 Defb19  
1456077\_x\_at 1.11097 --- ---  
1456078\_x\_at 0.91709 "tubulin, beta 2c" Tubb2c  
1456079\_x\_at 1.20850 apurinic/aprimidinic endonuclease 1 Apex1  
1456080\_a\_at 0.83807 serine incorporator 3 Serinc3  
1456081\_a\_at 1.31831 acetoacetyl-CoA synthetase Aacs  
1456082\_x\_at 0.94208 chaperonin subunit 4 (delta) Cct4  
1456083\_x\_at 0.96478 "eukaryotic translation initiation factor 3, subunit 8" Eif3s8  
1456084\_x\_at 0.69538 fibromodulin Fmod  
1456085\_x\_at 0.88253 CD151 antigen Cd151  
1456086\_x\_at 0.88186 similar to polyglutamine binding protein 1 LOC631302

1456087\_at 0.82991 nuclear factor I/A Nfia  
1456088\_at 1.13807 baculoviral IAP repeat-containing 4 Birc4  
1456089\_at 0.91349 tripartite motif protein 23 Trim23  
1456090\_at 1.04661 "pyruvate dehydrogenase complex, component X" Pdhx  
1456091\_at 1.08691 SEC22 vesicle trafficking protein-like C (S. cerevisiae) Sec22c  
1456092\_at 1.07458 potassium channel tetramerisation domain containing 7 Kctd7  
1456093\_at 0.87008 zinc finger protein 536 Zfp536  
1456094\_at 0.95475 ubiquitin specific peptidase 36 Usp36  
1456095\_at 1.04621 tyrosinase Tyr  
1456096\_at 0.63718 RIKEN cDNA 6430573F11 gene 6430573F11Rik  
1456097\_a\_at 0.83491 integrin beta 3 binding protein (beta3-endonexin) Itgb3bp  
1456098\_a\_at 0.83674 "engulfment and cell motility 2, ced-12 homolog (C. elegans)" Elmo2  
1456099\_at 1.06727 RIKEN cDNA D930017J03 gene D930017J03Rik  
1456100\_at 1.04383 cDNA sequence BC089491 BC089491  
1456101\_at 1.14718 hypothetical protein LOC640072 /// hypothetical protein LOC677194  
LOC640072 /// LOC677194  
1456102\_a\_at 1.04810 cullin 5 Cul5  
1456103\_at 0.97966 promyelocytic leukemia Pml  
1456104\_at 0.97798 "proteasome (prosome, macropain) 26S subunit, non-ATPase, 11" Psmd11  
1456105\_at 0.99391 membrane associated DNA binding protein Mnab  
1456106\_x\_at 0.87991 serologically defined colon cancer antigen 3 Sdccag3  
1456107\_x\_at 1.01903 elongation factor Tu GTP binding domain containing 2 Eftud2  
1456108\_x\_at 0.94843 zinc finger protein 179 Zfp179  
1456109\_a\_at 1.02821 mitochondrial ribosomal protein S15 Mrps15  
1456110\_at 0.90235 ankyrin repeat domain 11 Ankrd11  
1456111\_at 0.86984 RIKEN cDNA D930028F11 gene D930028F11Rik  
1456112\_at 1.01591 translocated promoter region Tpr  
1456113\_at 1.08195 ornithine aminotransferase-like 1 Oat11  
1456114\_at 1.00591 CDP-diacylglycerol synthase 1 Cds1  
1456115\_at 0.82686 PHD finger protein 3 Phf3  
1456116\_at 0.93597 "catenin (cadherin associated protein), delta 2" Ctnnd2  
1456117\_at 1.13597 RIKEN cDNA 2600005C20 gene 2600005C20Rik  
1456118\_at 1.05773 methyltransferase like 2 Mettl2  
1456119\_at 0.95569 "glutamate receptor, metabotropic 5" Grm5  
1456120\_at 0.99084 RIKEN cDNA 3110001I20 gene 3110001I20Rik  
1456121\_at 0.99405 leucine-rich repeats and IQ motif containing 2 Lrriq2  
1456122\_at 1.43417 --- ---  
1456123\_at 0.92078 expressed sequence AI481121 AI481121  
1456124\_x\_at 0.91255 seminal vesicle secretion 5 Svs5  
1456125\_a\_at 0.93815 "dynein light chain LC8-type 1 /// similar to dynein, cytoplasmic, light peptide /// similar to dynein, cytoplasmic, light peptide /// similar to dynein, cytoplasmic, light peptide" Dynl11 /// LOC627788 /// LOC637840 /// LOC672375  
1456126\_at 0.95813 mucosa associated lymphoid tissue lymphoma translocation gene 1 Malt1

1456127\_at 0.89541 RIKEN cDNA 9630008K15 gene 9630008K15Rik  
1456128\_at 0.88340 "ATP synthase, H<sup>+</sup> transporting, mitochondrial F<sub>0</sub> complex, subunit c (subunit 9), isoform 2" Atp5g2  
1456129\_at 1.03687 RIKEN cDNA E030013G06 gene E030013G06Rik  
1456130\_at 0.79934 hypothetical LOC553091 LOC553091  
1456131\_x\_at 0.93978 dystroglycan 1 Dag1  
1456132\_x\_at 0.98478 "TSC22 domain family, member 1" Tsc22d1  
1456133\_x\_at 0.69660 integrin beta 5 Itgb5  
1456134\_x\_at 0.95272 Yip1 interacting factor homolog A (S. cerevisiae) Yif1a  
1456135\_s\_at 0.93170 paxillin Pxn  
1456136\_at 1.65013 Kinesin family member C1 Kifc1  
1456137\_at 0.94408 neurexin III Nrnx3  
1456138\_at 1.05437 LY6/PLAUR domain containing 6 Lypd6  
1456139\_at 2.04741 antisense Igf2r RNA Air  
1456140\_at 0.97760 similar to zinc finger protein of the cerebellum 5 LOC624168  
1456141\_x\_at 0.94165 "BRCA1/BRCA2-containing complex, subunit 3" Brcc3  
1456142\_x\_at 0.97527 mortality factor 4 like 1 /// similar to mortality factor 4 like 1 isoform b /// RIKEN cDNA A730098P11 gene /// similar to mortality factor 4 like 1 /// similar to mortality factor 4 like 1 (predicted) Morf4l1 /// LOC433955 /// A730098P11Rik /// LOC627352 /// LOC635663  
1456143\_at 1.11456 protein kinase C binding protein 1 Prkcbp1  
1456144\_at 1.07308 region containing RIKEN cDNA 9630020C08 gene; neuron navigator 3 LOC676640  
1456145\_at 1.13505 "deleted in lymphocytic leukemia, 2" Dleu2  
1456146\_at 0.92866 oxysterol binding protein-like 10 Osbpl10  
1456147\_at 0.93099 "ST8 alpha-N-acetyl-neuraminidase alpha-2,8-sialyltransferase 6" St8sia6  
1456148\_a\_at 0.96787 RIKEN cDNA 1110014K08 gene 1110014K08Rik  
1456149\_at 1.06863 "DNA segment, Chr 11, Brigham & Women's Genetics 0517 expressed" D11Bwg0517e  
1456150\_at 1.09565 RIKEN cDNA A630082K20 gene A630082K20Rik  
1456151\_at 1.02580 zinc finger protein 358 Zfp358  
1456152\_at 0.96963 progesterin and adipoQ receptor family member V Paqr5  
1456153\_at 1.07720 slingshot homolog 2 (Drosophila) Ssh2  
1456154\_at 1.02896 Zinc finger protein 444 Zfp444  
1456155\_x\_at 1.00564 "fucosidase, alpha-L- 1, tissue" Fuca1  
1456156\_at 1.08730 leptin receptor Lepr  
1456157\_at 1.02129 "DNA segment, Chr 14, ERATO Doi 209, expressed" D14Ertd209e  
1456158\_at 1.05866 --- ---  
1456159\_at 3.36743 SET domain containing 5 Setd5  
1456160\_at 1.12200 Nucleoredoxin Nxn  
1456161\_at 0.89562 RIKEN cDNA 0610040B10 gene 0610040B10Rik  
1456162\_x\_at 1.04262 adducin 3 (gamma) Add3  
1456163\_at 1.14208 RIKEN cDNA 2700049P18 gene 2700049P18Rik  
1456164\_at 0.96846 expressed sequence AW011738 AW011738

|              |         |                                                                                                                                      |                                       |
|--------------|---------|--------------------------------------------------------------------------------------------------------------------------------------|---------------------------------------|
| 1456165_at   | 1.04516 | RIKEN cDNA 4921521F21 gene                                                                                                           | 4921521F21Rik                         |
| 1456166_at   | 1.10824 | ---                                                                                                                                  | ---                                   |
| 1456167_at   | 1.03189 | similar to PHD finger protein 19                                                                                                     | LOC241051                             |
| 1456168_at   | 1.08898 | Cyclin J-like Ccnjl                                                                                                                  |                                       |
| 1456169_at   | 1.00568 | similar to KAT protein                                                                                                               | LOC226654                             |
| 1456170_x_at | 0.95388 | calreticulin Calr                                                                                                                    |                                       |
| 1456171_at   | 0.96419 | ring finger protein 190                                                                                                              | Rnf190                                |
| 1456172_at   | 1.08202 | Thioredoxin domain containing 5                                                                                                      | Txndc5                                |
| 1456173_at   | 0.83588 | "Interleukin 10 receptor, alpha"                                                                                                     | Il10ra                                |
| 1456174_x_at | 1.11678 | N-myc downstream regulated gene 1                                                                                                    | Ndr1                                  |
| 1456175_a_at | 0.93771 | "coatamer protein complex, subunit beta 2 (beta prime)"                                                                              | Copb2                                 |
| 1456176_x_at | 0.82952 | "DNA segment, Chr 11, ERATO Doi 333, expressed"                                                                                      | D11Ert333e                            |
| 1456177_x_at | 0.87850 | zinc finger protein 706                                                                                                              | Zfp706                                |
| 1456178_at   | 0.94265 | "BMP and activin membrane-bound inhibitor, pseudogene (Xenopus laevis)"                                                              |                                       |
| Bambi-ps1    |         |                                                                                                                                      |                                       |
| 1456179_at   | 0.93427 | ---                                                                                                                                  | ---                                   |
| 1456180_at   | 0.88751 | similar to RNA binding motif protein 24 /// similar to RNA binding motif protein 24 /// similar to RNA binding motif protein 24      | LOC380843 /// LOC638266 /// LOC666794 |
| 1456181_at   | 1.04849 | RIKEN cDNA 9530020G05 gene                                                                                                           | 9530020G05Rik                         |
| 1456182_x_at | 0.91043 | melanoma antigen                                                                                                                     | Mela                                  |
| 1456183_at   | 1.04892 | oogenesis 4                                                                                                                          | Oog4                                  |
| 1456184_at   | 0.89575 | transmembrane protein 63c                                                                                                            | Tmem63c                               |
| 1456185_at   | 0.98388 | "NACHT, LRR and PYD containing protein 9a"                                                                                           | Nalp9a                                |
| 1456186_at   | 0.96329 | RIKEN cDNA 8030443D09 gene                                                                                                           | 8030443D09Rik                         |
| 1456187_at   | 0.99748 | "solute carrier family 7 (cationic amino acid transporter, y+ system), member 14"                                                    | Slc7a14                               |
| 1456188_at   | 1.00662 | "seminal vesicle protein, secretion 2"                                                                                               | Svs2                                  |
| 1456189_x_at | 0.89300 | latent transforming growth factor beta binding protein 3                                                                             | Ltbp3                                 |
| 1456190_a_at | 1.04962 | Acyl-CoA synthetase medium-chain family member 2                                                                                     | Acsm2                                 |
| 1456191_x_at | 0.98905 | protein kinase C and casein kinase substrate in neurons 3                                                                            | Pacsin3                               |
| 1456192_x_at | 1.11364 | cysteine-rich perinuclear theca 3                                                                                                    | Cypt3                                 |
| 1456193_x_at | 1.03780 | "glutathione peroxidase 4 /// similar to Phospholipid hydroperoxide glutathione peroxidase, mitochondrial precursor (PHGPx) (GPX-4)" | Gpx4 /// LOC671271                    |
| 1456194_a_at | 1.07917 | "Parkinson disease (autosomal recessive, early onset) 7"                                                                             | Park7                                 |
| 1456195_x_at | 0.66059 | integrin beta 5                                                                                                                      | Itgb5                                 |
| 1456196_x_at | 1.02124 | FK506 binding protein 1a                                                                                                             | Fkbp1a                                |
| 1456197_x_at | 0.95637 | Transcribed locus                                                                                                                    | ---                                   |
| 1456198_at   | 0.94137 | RIKEN cDNA 1810007D17 gene                                                                                                           | 1810007D17Rik                         |
| 1456199_x_at | 0.87341 | RAN binding protein 9                                                                                                                | Ranbp9                                |
| 1456200_at   | 1.30008 | inositol polyphosphate multikinase                                                                                                   | Ipmk                                  |
| 1456201_at   | 1.23712 | RIKEN cDNA 4632427E13 gene                                                                                                           | 4632427E13Rik                         |
| 1456202_at   | 0.98256 | cDNA sequence BC094219                                                                                                               | BC094219                              |
| 1456203_at   | 0.99358 | RIKEN cDNA 1110020A10 gene                                                                                                           | 1110020A10Rik                         |



1456204\_at 0.97496 RIKEN cDNA 2010107H07 gene 2010107H07Rik  
1456205\_x\_at 1.01049 tubulin cofactor a Tbca  
1456206\_at 0.91208 "AlkB, alkylation repair homolog 3 (E. coli)" Alkbh3  
1456207\_at 1.08048 mature T-cell proliferation 1 Mtcp1  
1456208\_at 1.05946 RIKEN cDNA A530057A03 gene A530057A03Rik  
1456209\_x\_at 1.03260 --- ---  
1456210\_at 1.38571 RIKEN cDNA 5430407P10 gene 5430407P10Rik  
1456211\_at 0.99468 "NACHT, leucine rich repeat and PYD containing 10" Nalp10  
1456212\_x\_at 0.96743 suppressor of cytokine signaling 3 Socs3  
1456213\_x\_at 0.98824 glutaminyl-tRNA synthetase Qars  
1456214\_at 0.90057 protocadherin 7 Pcdh7  
1456215\_at 0.93295 "transcription factor A, mitochondrial" Tfam  
1456216\_at 1.66426 "Casein kinase 1, alpha 1" Csnk1a1  
1456217\_at 0.82756 "DNA segment, Chr 7, Wayne State University 128, expressed" D7Wsu128e  
1456218\_at 0.87597 sorting nexin 22 Snx22  
1456219\_at 0.99290 similar to zinc finger protein of the cerebellum 5 LOC624168  
1456220\_at 0.76036 F-box and leucine-rich repeat protein 7 Fbxl7  
1456221\_at 0.92675 Cadherin 8 Cdh8  
1456222\_at 0.98752 BTB (POZ) domain containing 1 Btbd1  
1456223\_at 1.75879 F-box and leucine-rich repeat protein 5 Fbxl5  
1456224\_x\_at 0.93771 cancer antigen 1 Cage1  
1456225\_x\_at 1.05817 tribbles homolog 3 (Drosophila) Trib3  
1456226\_x\_at 0.86678 "discoidin domain receptor family, member 1" Ddr1  
1456227\_x\_at 0.98975 retinoblastoma binding protein 7 Rbbp7  
1456228\_x\_at 0.91807 myelin basic protein Mbp  
1456229\_at 0.98064 homeo box B3 Hoxb3  
1456230\_at 0.97766 RIKEN cDNA 4933422H20 gene 4933422H20Rik  
1456231\_at 0.98062 "phospholipase A2, group III" Pla2g3  
1456232\_at 1.25733 glucocorticoid modulatory element binding protein 1 Gmeb1  
1456233\_at 0.95973 Transcribed locus ---  
1456234\_at 1.05743 "LIM-domain containing, protein kinase" Limk1  
1456235\_at 0.89167 expressed sequence BB165335 BB165335  
1456236\_s\_at 1.08917 COMM domain containing 10 Commd10  
1456237\_x\_at 0.99454 CDNA sequence BC053401 BC053401  
1456238\_at 1.02770 similar to Zinc finger protein 133 LOC668917  
1456239\_at 0.99398 fibroblast growth factor 17 Fgf17  
1456240\_x\_at 0.96074 cell division cycle associated 4 Cdca4  
1456241\_a\_at 0.86961 RIKEN cDNA 1810073N04 gene 1810073N04Rik  
1456242\_at 1.02984 embryonic stem cell- and germ cell-specific protein Esgp  
1456243\_x\_at 0.89201 myeloid cell leukemia sequence 1 Mcl1  
1456244\_x\_at 1.01170 thioredoxin-like 2 Txnl2  
1456245\_x\_at 0.97423 vesicle-associated membrane protein 3 Vamp3  
1456246\_x\_at 0.93173 trophoblast specific protein beta Tpbpb

1456247\_x\_at 1.00691 proteolipid protein 2 /// similar to Proteolipid protein 2 /// similar to Proteolipid protein 2 /// similar to Proteolipid protein 2 Plp2 /// LOC620648 /// LOC669344 /// LOC672630  
 1456248\_at 0.90044 RIKEN cDNA 2310002A05 gene /// hypothetical protein LOC630971  
 2310002A05Rik /// LOC630971  
 1456249\_x\_at 1.00742 Synaptophysin Syp  
 1456250\_x\_at 1.01821 "transforming growth factor, beta induced" Tgfb1  
 1456251\_x\_at 0.89525 translocator protein Tspo  
 1456252\_x\_at 0.98206 "adaptor-related protein complex 1, sigma 2 subunit" Ap1s2  
 1456253\_s\_at 0.82015 "pleckstrin homology domain containing, family N member 1 /// kelch-like 17 (Drosophila)" Plekhn1 /// Klhl17  
 1456254\_at 1.03352 "Inositol polyphosphate-4-phosphatase, type II" Inpp4b  
 1456255\_at 0.94807 expressed sequence AI314180 AI314180  
 1456256\_at 1.40733 eukaryotic translation initiation factor 5 Eif5  
 1456257\_at 1.38612 RIKEN cDNA C130065N10 gene C130065N10Rik  
 1456258\_at 0.93865 empty spiracles homolog 2 (Drosophila) Emx2  
 1456259\_at 0.77212 similar to integrator complex subunit 10 LOC674888  
 1456260\_at 2.30973 retinoblastoma binding protein 4 Rbbp4  
 1456261\_at 0.96089 SH3-domain kinase binding protein 1 Sh3kbp1  
 1456262\_at 1.24597 RNA binding motif protein 5 Rbm5  
 1456263\_at 0.86297 Notch gene homolog 4 (Drosophila) Notch4  
 1456264\_at 0.96194 COMM domain containing 7 /// similar to COMM domain containing protein 7 /// similar to COMM domain-containing protein 7 Commd7 /// LOC631742 /// LOC674161  
 1456265\_at 0.88533 hypothetical protein LOC624866 LOC624866  
 1456266\_at 1.13956 ribosomal protein L30 Rpl30  
 1456267\_at 0.88767 expressed sequence AI451606 AI451606  
 1456268\_at 1.08776 CDC28 protein kinase 1b Cks1b  
 1456269\_at 1.00296 preferentially expressed antigen in melanoma like 6 Prmel6  
 1456270\_s\_at 1.08016 preferentially expressed antigen in melanoma like 6 Prmel6  
 1456271\_at 0.82276 "gene model 944, (NCBI)" Gm944  
 1456272\_at 2.61285 SET domain containing 5 Setd5  
 1456273\_x\_at 0.78169 thiopurine methyltransferase Tpmt  
 1456274\_at 1.01111 RIKEN cDNA C230071H18 gene C230071H18Rik  
 1456275\_at 0.93393 mitochondrial ribosomal protein L21 /// hypothetical gene supported by AK003285; NM\_172252 Mrpl21 /// LOC384939  
 1456276\_at 1.02596 --- ---  
 1456277\_at 0.93220 RIKEN cDNA 7530414M10 gene 7530414M10Rik  
 1456278\_x\_at 0.94594 G protein-coupled receptor 172B Gpr172b  
 1456279\_a\_at 0.88765 B-cell receptor-associated protein 31 Bcap31  
 1456280\_at 1.13208 claspin homolog (Xenopus laevis) Clspn  
 1456281\_at 1.15138 F-box and leucine-rich repeat protein 18 Fbxl18  
 1456282\_at 1.15423 CDNA clone IMAGE:30014192 ---  
 1456283\_at 0.93747 neuropilin (NRP) and tolloid (TLL)-like 1 Neto1  
 1456284\_at 1.14186 "gene model 905, (NCBI)" Gm905

|              |         |                                                                                       |                    |
|--------------|---------|---------------------------------------------------------------------------------------|--------------------|
| 1456285_at   | 0.95876 | "Polymerase (DNA directed), alpha 1"                                                  | Pola1              |
| 1456286_at   | 1.13509 | Component of oligomeric golgi complex 3                                               | Cog3               |
| 1456287_at   | 0.88784 | expressed sequence BB236558                                                           | BB236558           |
| 1456288_at   | 0.91756 | schlafen 5                                                                            | Slfn5              |
| 1456289_at   | 0.86673 | hepcidin antimicrobial peptide 2 /// hepcidin antimicrobial peptide 1                 | Hamp2 /// Hamp1    |
| 1456290_x_at | 0.96298 | cerebral cavernous malformation 2 homolog (human)                                     | Ccm2               |
| 1456291_x_at | 0.91310 | scleraxis                                                                             | Scx                |
| 1456292_a_at | 0.99985 | vimentin                                                                              | Vim                |
| 1456293_s_at | 1.05621 | cyclin H /// similar to cyclin H                                                      | Ccnh /// LOC672655 |
| 1456294_at   | 0.84818 | RIKEN cDNA 0610013E23 gene                                                            | 0610013E23Rik      |
| 1456295_at   | 0.70641 | RIKEN cDNA B230114P17 gene                                                            | B230114P17Rik      |
| 1456296_at   | 1.58459 | RIKEN cDNA 5830418K08 gene                                                            | 5830418K08Rik      |
| 1456297_at   | 1.01064 | thymic stromal cotransporter                                                          | Tscot              |
| 1456298_at   | 1.00576 | ---                                                                                   | ---                |
| 1456299_at   | 1.09173 | RIKEN cDNA E330012B07 gene                                                            | E330012B07Rik      |
| 1456300_at   | 1.04155 | ilvB (bacterial acetolactate synthase)-like                                           | Ilvbl              |
| 1456301_at   | 1.07821 | homeo box C5                                                                          | Hoxc5              |
| 1456302_at   | 0.88216 | peroxisomal biogenesis factor 6                                                       | Pex6               |
| 1456303_at   | 2.89388 | PHD finger protein 14                                                                 | Phf14              |
| 1456304_at   | 0.92551 | "gene model 996, (NCBI)"                                                              | Gm996              |
| 1456305_x_at | 0.90924 | similar to oocyte specific homeobox 2                                                 | LOC666466          |
| 1456306_a_at | 1.02931 | uromodulin                                                                            | Umod               |
| 1456307_s_at | 1.03607 | adenylate cyclase 7                                                                   | Adcy7              |
| 1456308_x_at | 0.99175 | tripartite motif protein 28                                                           | Trim28             |
| 1456309_x_at | 1.06062 | LIM and SH3 protein 1                                                                 | Lasp1              |
| 1456310_a_at | 0.99136 | RIKEN cDNA 2610002J02 gene                                                            | 2610002J02Rik      |
| 1456311_x_at | 1.13262 | establishment of cohesion 1 homolog 2 (S. cerevisiae)                                 | Esco2              |
| 1456312_x_at | 0.86934 | gelsolin                                                                              | Gsn                |
| 1456313_x_at | 0.99393 | mitochondrial ribosomal protein L28                                                   | Mrpl28             |
| 1456314_x_at | 0.92846 | CDK2 (cyclin-dependent kinase 2)-associated protein 1                                 | Cdk2ap1            |
| 1456315_a_at | 0.93702 | "protein tyrosine phosphatase-like (proline instead of catalytic arginine), member a" | Ptpla              |
| 1456316_a_at | 0.84784 | acyl-Coenzyme A binding domain containing 3                                           | Acbd3              |
| 1456317_at   | 0.96291 | "aldehyde dehydrogenase 3 family, member B2"                                          | Aldh3b2            |
| 1456318_at   | 1.17034 | "C-type lectin domain family 1, member a"                                             | Clec1a             |
| 1456319_at   | 1.18617 | hypothetical protein LOC665081                                                        | LOC665081          |
| 1456320_at   | 1.01677 | cDNA sequence BC049806                                                                | BC049806           |
| 1456321_at   | 0.84216 | NIPA-like domain containing 1                                                         | Npal1              |
| 1456322_at   | 0.98051 | ---                                                                                   | ---                |
| 1456323_at   | 1.01817 | protein O-fucosyltransferase 1                                                        | Pofut1             |
| 1456324_at   | 0.79800 | zinc finger protein 748                                                               | Zfp748             |
| 1456325_at   | 0.88089 | centrosomal protein 68                                                                | Cep68              |

1456326\_at 0.94100 "gene model 784, (NCBI)" Gm784  
1456327\_at 0.99752 Transcribed locus ---  
1456328\_at 1.04045 B-cell scaffold protein with ankyrin repeats 1 Bank1  
1456329\_at 1.07849 protogenin homolog (Gallus gallus) Prtg  
1456330\_at 0.99135 polycomb group ring finger 2 Pcgf2  
1456331\_at 1.01813 RIKEN cDNA 9130023H24 gene 9130023H24Rik  
1456332\_at 1.07797 transmembrane protein 17 Tmem17  
1456333\_a\_at 0.88066 Rho GTPase activating protein 6 Arhgap6  
1456334\_s\_at 1.03402 RIKEN cDNA A230106D06 gene A230106D06Rik  
1456335\_at 0.97555 "gene model 106, (NCBI)" Gm106  
1456336\_at 0.91985 RIKEN cDNA A330102K23 gene A330102K23Rik  
1456337\_at 0.91487 "centaurin, delta 1" Centd1  
1456338\_at 1.06235 RIKEN cDNA 9130023D20 gene 9130023D20Rik  
1456339\_at 0.91466 RIKEN cDNA 2810410D24 gene 2810410D24Rik  
1456340\_at 1.20766 RIKEN cDNA 2610205E22 gene 2610205E22Rik  
1456341\_a\_at 0.72225 Kruppel-like factor 9 Klf9  
1456342\_at 1.00421 paired box gene 6 Pax6  
1456343\_at 1.00748 "solute carrier family 35, member F1" Slc35f1  
1456344\_at 0.98109 Tenascin C Tnc  
1456345\_at 0.94637 RIKEN cDNA A630057N01 gene A630057N01Rik  
1456346\_at 1.04850 Dynamin 1 Dnm1  
1456347\_at 1.97527 Leucyl/cystinyl aminopeptidase Lnpep  
1456348\_x\_at 1.06095 progesterin and adipoQ receptor family member V Paqr5  
1456349\_x\_at 1.04390 SMT3 suppressor of mif two 3 homolog 1 (yeast) Sumo1  
1456350\_at 1.29151 zinc finger protein 451 Zfp451  
1456351\_at 1.03349 bromodomain containing 8 Brd8  
1456352\_a\_at 1.00808 "splicing factor 3b, subunit 2" Sf3b2  
1456353\_at 1.23382 suppressor of Ty 4 homolog 1 (S. cerevisiae) Supt4h1  
1456354\_at 0.83206 "cholinergic receptor, nicotinic, alpha polypeptide 4" Chrna4  
1456355\_s\_at 1.00538 RIKEN cDNA 2810002G02 gene /// region containing RIKEN cDNA  
2810002G02 gene; tuftelin interacting protein 11 2810002G02Rik /// LOC671202  
1456356\_at 1.04157 RIKEN cDNA B230217O12 gene B230217O12Rik  
1456357\_at 1.10263 RIKEN cDNA A930041I02 gene A930041I02Rik  
1456358\_at 1.33334 Ets variant gene 3 Etv3  
1456359\_at 0.99738 peptidylprolyl isomerase domain and WD repeat containing 1 Ppwd1  
1456360\_at 0.99819 "DCUN1D1 DCN1, defective in cullin neddylation 1, domain containing 1 (S.  
cerevisiae)" Dcun1d1  
1456361\_at 0.92774 RIKEN cDNA 2600003E23 gene 2600003E23Rik  
1456362\_at 0.92665 "cytochrome P450, family 11, subfamily b, polypeptide 1" Cyp11b1  
1456363\_at 1.04028 Suppression of tumorigenicity 7-like St7l  
1456364\_at 0.94079 RIKEN cDNA C230057M02 gene C230057M02Rik  
1456365\_at 0.96601 similar to ubiquitin A-52 residue ribosomal protein fusion product 1 /// similar  
to ubiquitin A-52 residue ribosomal protein fusion product 1 LOC629750 /// LOC639383

1456366\_at 0.96137 RIKEN cDNA 1700015F17 gene 1700015F17Rik  
1456367\_at 1.00588 fucosyltransferase 8 Fut8  
1456368\_at 1.07305 a disintegrin and metalloprotease domain 4b Adam4b  
1456369\_at 1.13664 protection of telomeres 1 Pot1  
1456370\_s\_at 0.96382 RIKEN cDNA 0610037L13 gene 0610037L13Rik  
1456371\_a\_at 0.85009 shroom family member 1 Shroom1  
1456372\_at 1.08775 Integral membrane protein 2B Itm2b  
1456373\_x\_at 1.01568 ribosomal protein S20 Rps20  
1456374\_x\_at 1.03973 "eukaryotic translation initiation factor 3, subunit 8" Eif3s8  
1456375\_x\_at 0.96264 tripartite motif protein 27 Trim27  
1456376\_at 1.12466 Matrix metalloproteinase 24 Mmp24  
1456377\_x\_at 0.98585 LIM domain containing 2 /// similar to epithelial protein lost in neoplasm  
Limd2 /// LOC632329  
1456378\_s\_at 0.93598 F-box and leucine-rich repeat protein 20 Fbxl20  
1456379\_x\_at 0.90727 delta/notch-like EGF-related receptor Dner  
1456380\_x\_at 0.88969 "calponin 3, acidic" Cnn3  
1456381\_x\_at 0.85563 myeloid cell leukemia sequence 1 Mcl1  
1456382\_at 1.06411 "ATPase family, AAA domain containing 1" Atad1  
1456383\_at 1.03072 ribosomal L1 domain containing 1 Rsl1d1  
1456384\_at 1.00397 neuroligin 3 Nlgn3  
1456385\_x\_at 1.01972 UBX domain containing 3 Ubx3  
1456386\_at 1.68643 "RNA-binding region (RNP1, RRM) containing 2" Rnpc2  
1456387\_at 0.95543 nucleolar protein 4 Nol4  
1456388\_at 0.92617 "ATPase, class VI, type 11A" Atp11a  
1456389\_at 0.96782 zinc finger homeobox 1b Zfx1b  
1456390\_at 1.23812 --- ---  
1456391\_at 0.92929 tudor domain containing 5 Tdrd5  
1456392\_at 1.08153 neuronal growth regulator 1 Negr1  
1456393\_at 0.79157 RIKEN cDNA 2310002J21 gene 2310002J21Rik  
1456394\_at 0.98064 RAD50 interactor 1 Rint1  
1456395\_at 0.77438 "peroxisome proliferative activated receptor, gamma, coactivator 1 alpha"  
Ppargc1a  
1456396\_at 1.18171 --- ---  
1456397\_at 0.96952 cadherin 4 Cdh4  
1456398\_at 0.94723 taurine upregulated gene 1 Tug1  
1456399\_at 0.98522 --- ---  
1456400\_at 0.94188 "telomeric repeat binding factor 2, interacting protein" Terf2ip  
1456401\_at 0.80879 "calcium channel, voltage-dependent, beta 2 subunit" Cacnb2  
1456402\_at 1.01816 RIKEN cDNA A330076H08 gene A330076H08Rik  
1456403\_at 0.93732 phosphoprotein associated with glycosphingolipid microdomains 1 Pag1  
1456404\_at 0.57131 "a disintegrin-like and metalloproteinase (reprolysin type) with thrombospondin  
type 1 motif, 5 (aggrecanase-2)" Adamts5  
1456405\_at 0.89965 death inducer-obliterator 1 Dido1

1456406\_at 1.08296 --- ---  
1456407\_a\_at 1.16808 tousled-like kinase 1 Tlk1  
1456408\_x\_at 1.37614 RIKEN cDNA 4933439C10 gene 4933439C10Rik  
1456409\_at 1.01826 --- ---  
1456410\_at 1.14028 expressed sequence AU045128 AU045128  
1456411\_at 1.07243 RCC1 domain containing 1 Rccd1  
1456412\_a\_at 1.02146 putative phosphatase RP23-136K12.4  
1456413\_at 1.25197 phosphodiesterase 4D interacting protein (myomegalin) Pde4dip  
1456414\_at 0.90327 "In vitro fertilized eggs cDNA, RIKEN full-length enriched library, clone:7420414K24 product:unclassifiable, full insert sequence" ---  
1456415\_at 0.90788 zinc finger protein 451 Zfp451  
1456416\_at 0.95381 "core-binding factor, runt domain, alpha subunit 2, translocated to, 2 homolog (human)" Cbfa2t2h  
1456417\_at 0.90743 zinc finger protein of the cerebellum 4 Zic4  
1456418\_at 0.99542 "PREDICTED: Mus musculus similar to Inward rectifier potassium channel 13 (Potassium channel, inwardly rectifying, subfamily J, member 13) (Inward rectifier K(+)) channel Kir7.1) (LOC620405), mRNA" ---  
1456419\_at 1.09753 RIKEN cDNA 5730455P16 gene 5730455P16Rik  
1456420\_at 0.82984 AT rich interactive domain 4A (Rbp1 like) Arid4a  
1456421\_at 0.99440 RIKEN cDNA 4930578M01 gene 4930578M01Rik  
1456422\_at 0.83504 --- ---  
1456423\_at 0.77746 methyl-CpG binding domain protein 5 Mbd5  
1456424\_s\_at 0.93517 phospholipid transfer protein Pltp  
1456425\_at 0.97776 RIKEN cDNA 9230115E21 gene 9230115E21Rik  
1456426\_at 1.09962 --- ---  
1456427\_at 0.96048 "glycoprotein Ib, beta polypeptide" Gp1bb  
1456428\_at 1.08973 Chemokine (C-X-C motif) ligand 15 Cxcl15  
1456429\_at 1.24537 mucosa associated lymphoid tissue lymphoma translocation gene 1 Malt1  
1456430\_at 1.37612 coiled-coil domain containing 39 Ccdc39  
1456431\_at 0.95162 zinc finger protein 64 Zfp64  
1456432\_at 0.95142 GRB2-related adaptor protein 2 Grap2  
1456433\_at 1.04033 regulator of chromosome condensation (RCC1) and BTB (POZ) domain containing protein 1 Rcbtb1  
1456434\_x\_at 0.84685 heat shock protein 8 Hspb8  
1456435\_at 1.00003 MORN repeat containing 1 Morn1  
1456436\_x\_at 1.01397 ribosomal protein S20 Rps20  
1456437\_x\_at 1.45212 "complement component 1, r subcomponent /// similar to Complement C1r-B subcomponent precursor (Complement component 1, r-B subcomponent) /// similar to complement component 1, r subcomponent" C1r /// LOC667277 /// LOC677405  
1456438\_x\_at 0.96070 ribophorin I Rpn1  
1456439\_x\_at 0.88468 "microtubule associated monooxygenase, calponin and LIM domain containing 1" Mical1  
1456440\_s\_at 0.99215 "ST8 alpha-N-acetyl-neuraminide alpha-2,8-sialyltransferase 6" St8sia6

1456441\_at 1.15363 coiled-coil domain containing 87 Ccdc87  
1456442\_at 0.85350 RAB3A interacting protein (rabin3)-like 1 Rab3il1  
1456443\_at 1.02018 RIKEN cDNA 4930404N11 gene 4930404N11Rik  
1456444\_at 0.97531 F-box protein 41 Fbxo41  
1456445\_at 1.13566 RIKEN cDNA 4930563D23 gene 4930563D23Rik  
1456446\_at 1.18986 RIKEN cDNA 4930523C07 gene 4930523C07Rik  
1456447\_at 0.80046 --- ---  
1456448\_at 1.03680 RIKEN cDNA 2610301B20 gene 2610301B20Rik  
1456449\_at 2.30845 Suppressor of Ty 16 homolog (S. cerevisiae) Supt16h  
1456450\_at 1.22842 "Cystinosis, nephropathic" Ctns  
1456451\_at 0.87889 CEA-related cell adhesion molecule 15 Ceacam15  
1456452\_at 1.03153 cDNA sequence BC107230 BC107230  
1456453\_at 1.48194 Ena-vasodilator stimulated phosphoprotein Evl  
1456454\_at 0.98508 cartilage homeo protein 1 Cart1  
1456455\_at 0.98299 mortality factor 4 like 1 /// similar to mortality factor 4 like 1 isoform b ///  
similar to mortality factor 4 like 1 /// similar to mortality factor 4 like 1 (predicted) Morf4l1 ///  
LOC433955 /// LOC627352 /// LOC635663  
1456456\_x\_at 0.95705 Melanoma antigen Mela  
1456457\_at 1.08509 "Solute carrier family 32 (GABA vesicular transporter), member 1" Slc32a1  
1456458\_at 0.94705 --- ---  
1456459\_x\_at 0.99869 coiled-coil domain containing 53 Ccdc53  
1456460\_at 1.06887 cDNA sequence BC068281 BC068281  
1456461\_at 1.07549 Ewing sarcoma breakpoint region 1 Ewsr1  
1456462\_x\_at 0.85884 "protein phosphatase 1, catalytic subunit, beta isoform" Ppp1cb  
1456463\_at 0.99342 RIKEN cDNA A230106M20 gene A230106M20Rik  
1456464\_x\_at 0.93711 --- ---  
1456465\_at 1.07868 RIKEN cDNA B430110G05 gene B430110G05Rik  
1456466\_x\_at 0.91242 ataxin 10 Atxn10  
1456467\_s\_at 0.88752 nemo like kinase Nlk  
1456468\_x\_at 0.84236 RIKEN cDNA 1110012N22 gene 1110012N22Rik  
1456469\_x\_at 0.91138 LIM and SH3 protein 1 Lasp1  
1456470\_x\_at 0.87751 "tubulin, beta 2c" Tubb2c  
1456471\_x\_at 0.91633 3-phosphoglycerate dehydrogenase /// similar to 3-phosphoglycerate  
dehydrogenase /// similar to 3-phosphoglycerate dehydrogenase /// similar to 3-phosphoglycerate  
dehydrogenase /// similar to 3-phosphoglycerate dehydrogenase /// similar to 3-phosphoglycerate  
dehydrogenase /// similar to 3-phosphoglycerate dehydrogenase /// similar to 3-phosphoglycerate  
dehydrogenase /// similar to 3-phosphoglycerate dehydrogenase /// similar to 3-phosphoglycerate  
dehydrogenase /// similar to 3-phosphoglycerate dehydrogenase /// similar to 3-phosphoglycerate  
dehydrogenase /// similar to 3-phosphoglycerate dehydrogenase /// similar to 3-phosphoglycerate  
dehydrogenase /// similar to 3-phosphoglycerate dehydrogenase Phgdh /// LOC382931 ///  
LOC384524 /// LOC385344 /// LOC547171 /// LOC627427 /// LOC666422 /// LOC666875 ///  
LOC668771 /// LOC669671 /// LOC669985 /// LOC670155 /// LOC670187 /// LOC671102 ///

LOC671972 /// LOC673015 /// LOC675010

1456472\_at 0.97681 armadillo repeat containing 4 Armc4  
 1456473\_x\_at 0.88988 ADP-ribosylation factor 2 Arf2  
 1456474\_at 0.98960 --- ---  
 1456475\_s\_at 0.91567 "protein kinase, cAMP dependent regulatory, type II beta" Prkar2b  
 1456476\_at 1.03601 ataxin 2-like Atxn2l  
 1456477\_at 1.05063 cyclin T1 Ccnt1  
 1456478\_at 1.13679 phosphoglucomutase 2-like 1 Pgm2l1  
 1456479\_at 0.89195 sorting nexin family member 30 Snx30  
 1456480\_at 0.61416 furry homolog (Drosophila) Fry  
 1456481\_at 0.98533 "DNA segment, Chr 9, ERATO Doi 280, expressed" D9Ert280e  
 1456482\_at 0.84447 "phosphatidylinositol 3 kinase, regulatory subunit, polypeptide 3 (p55)"  
 Pik3r3  
 1456483\_at 0.80717 zinc finger protein 9 Zfp9  
 1456484\_at 0.85414 dehydrogenase/reductase (SDR family) X chromosome Dhrrx  
 1456485\_at 0.94676 nuclear protein in the AT region Npat  
 1456486\_at 0.91194 zinc finger protein 574 Zfp574  
 1456487\_at 0.75843 adenylate cyclase 1 Adcy1  
 1456488\_at 1.04958 WD repeat domain 33 Wdr33  
 1456489\_at 1.02159 cleavage and polyadenylation factor subunit homolog (S. cerevisiae) Pcf11  
 1456490\_at 0.96970 CDK2-associated protein 2 Cdk2ap2  
 1456491\_at 0.91683 Expressed sequence AI606861 AI606861  
 1456492\_at 1.14800 RIKEN cDNA 9130404D08 gene 9130404D08Rik  
 1456493\_at 1.13792 RIKEN cDNA 5031415C07 gene /// RIKEN cDNA 5830484A20 gene ///  
 similar to Sp110 nuclear body protein /// similar to Sp110 nuclear body protein /// similar to Sp110  
 nuclear body protein /// similar to Sp110 nuclear body protein /// similar to Sp110 nuclear body  
 protein /// similar to Sp110 nuclear body protein /// similar to Sp110 nuclear body protein /// similar to  
 Sp110 nuclear body protein /// similar to Sp110 nuclear body protein /// similar to Sp110 nuclear body  
 protein 5031415C07Rik /// 5830484A20Rik /// LOC619671 /// MGC118608 /// LOC671287 ///  
 LOC673121 /// LOC673432 /// LOC673556 /// LOC673850 /// LOC673913 /// LOC673955 ///  
 LOC673970  
 1456494\_a\_at 1.02850 tripartite motif protein 30 /// expressed sequence AI451617 Trim30 ///  
 AI451617  
 1456495\_s\_at 0.87107 oxysterol binding protein-like 6 Osbpl6  
 1456496\_at 1.03549 Death-associated kinase 3 Dapk3  
 1456497\_x\_at 1.01170 ribosomal protein S10 Rps10  
 1456498\_at 0.93976 integrin alpha 4 Itga4  
 1456499\_at 0.74458 hypothetical LOC552912 LOC552912  
 1456500\_at 0.79866 anterior pharynx defective 1b homolog (C. elegans) Aph1b  
 1456501\_at 0.90763 RIKEN cDNA 2610528E23 gene 2610528E23Rik  
 1456502\_at 0.95798 dual-specificity tyrosine-(Y)-phosphorylation regulated kinase 2 Dyrk2  
 1456503\_at 1.19031 nucleoporin 214 Nup214  
 1456504\_at 1.01198 zinc finger protein 182 Zfp182



1456505\_at 0.90425 Braf transforming gene Braf  
1456506\_at 1.21876 PRP38 pre-mRNA processing factor 38 (yeast) domain containing B Prpf38b  
1456507\_at 1.10440 zinc finger protein 454 Zfp454  
1456508\_at 1.21450 RIKEN cDNA A030001H23 gene A030001H23Rik  
1456509\_at 0.92689 RIKEN cDNA 1110032F04 gene 1110032F04Rik  
1456510\_x\_at 0.92013 UbiE-YGHL1 fusion protein Ubie  
1456511\_x\_at 1.04519 ES cell-expressed Ras Eras  
1456512\_at 1.01116 PDZ domain containing RING finger 4 Pdzn4  
1456513\_at 1.14306 Early B-cell factor 3 Ebf3  
1456514\_at 2.92346 --- ---  
1456515\_s\_at 0.92052 transcription factor-like 5 (basic helix-loop-helix) Tcf15  
1456516\_x\_at 1.09768 UDP-N-acetylglucosamine pyrophosphorylase 1 /// similar to UDP-N-acetylhexosamine pyrophosphorylase Uap1 /// LOC640502  
1456517\_at 0.91808 transmembrane protein 44 Tmem44  
1456518\_at 0.89742 RIKEN cDNA 4930422I07 gene 4930422I07Rik  
1456519\_at 1.13087 Expressed sequence AW493845 AW493845  
1456520\_at 1.00006 RIKEN cDNA 9530033F24 gene 9530033F24Rik  
1456521\_at 0.86936 Transcribed locus ---  
1456522\_at 0.89318 --- ---  
1456523\_at 1.05661 expressed sequence C77713 C77713  
1456524\_at 1.11242 neuregulin 1 Nrg1  
1456525\_at 0.99319 EST AA881470 AA881470  
1456526\_at 1.76864 RIKEN cDNA C130034I24 gene C130034I24Rik  
1456527\_at 0.96302 "HECT, C2 and WW domain containing E3 ubiquitin protein ligase 1"  
Hecw1  
1456528\_x\_at 1.19094 nucleolin Ncl  
1456529\_at 0.96351 --- ---  
1456530\_x\_at 1.12909 "elongation of very long chain fatty acids (FEN1/Elo2, SUR4/Elo3, yeast)-like 1" Elovl1  
1456531\_x\_at 1.02109 PRP19/PSO4 pre-mRNA processing factor 19 homolog (S. cerevisiae)  
Prpf19  
1456532\_at 1.06140 "Platelet-derived growth factor, D polypeptide" Pdgfd  
1456533\_at 1.43519 dpy-19-like 1 (C. elegans) Dpy1911  
1456534\_at 0.86615 "Mannosidase, alpha, class 1A, member 2" Man1a2  
1456535\_at 0.90075 vacuolar protein sorting 13C (yeast) Vps13c  
1456536\_at 0.82929 THAP domain containing 6 Thap6  
1456537\_at 1.02060 RIKEN cDNA A930033H14 gene A930033H14Rik  
1456538\_at 0.74660 serologically defined colon cancer antigen 8 Sdccag8  
1456539\_at 1.05419 --- ---  
1456540\_s\_at 0.99872 myotubularin related protein 6 Mtmr6  
1456541\_x\_at 0.94571 "ATPase family, AAA domain containing 3A" Atad3a  
1456542\_s\_at 1.03937 glutaminyl-tRNA synthase (glutamine-hydrolyzing)-like 1 Qrs11  
1456543\_at 0.73386 prokineticin receptor 1 Prokr1

1456544\_at 1.06257 --- ---  
1456545\_at 0.99611 interleukin 18 receptor accessory protein Il18rap  
1456546\_at 0.90426 RIKEN cDNA 1700097N02 gene 1700097N02Rik  
1456547\_at 2.45211 Sloan-Kettering viral oncogene homolog Ski  
1456548\_at 1.45795 Metadherin Mtdh  
1456549\_at 1.07980 "gene model 550, (NCBI)" Gm550  
1456550\_at 1.10856 --- ---  
1456551\_at 0.83463 "Aldehyde dehydrogenase 1 family, member L1" Aldh111  
1456552\_at 1.07135 "2 days pregnant adult female ovary cDNA, RIKEN full-length enriched library, clone:E330015D05 product:hypothetical protein, full insert sequence" ---  
1456553\_at 1.91596 "Zinc finger, CCHC domain containing 11" Zcchc11  
1456554\_at 0.93144 RIKEN cDNA 7530414M10 gene 7530414M10Rik  
1456555\_at 1.06467 coiled-coil domain containing 67 Ccdc67  
1456556\_at 1.13060 RIKEN cDNA A230009B12 gene A230009B12Rik  
1456557\_at 0.89205 RIKEN cDNA 1700041C02 gene 1700041C02Rik  
1456558\_s\_at 0.90526 expressed sequence C87977 C87977  
1456559\_at 1.00803 empty spiracles homolog 2 (Drosophila) opposite strand Emx2os  
1456560\_at 1.06355 "gene model 93, (NCBI)" Gm93  
1456561\_s\_at 0.83679 Kruppel-like factor 17 Klf17  
1456562\_x\_at 1.03942 KIAA0415 protein KIAA0415  
1456563\_at 1.05402 RIKEN cDNA 4933429F08 gene 4933429F08Rik  
1456564\_at 1.01894 RIKEN cDNA C030046I01 gene C030046I01Rik  
1456565\_s\_at 0.93657 mitogen activated protein kinase kinase kinase 12 Map3k12  
1456566\_x\_at 1.10054 RNA binding motif protein 14 Rbm14  
1456567\_x\_at 0.91199 granulin Grn  
1456568\_at 0.96275 Gelsolin Gsn  
1456569\_x\_at 0.91875 gelsolin Gsn  
1456570\_at 1.00677 --- ---  
1456571\_at 1.03306 "decapping enzyme, scavenger" Dcps  
1456572\_x\_at 0.99607 chaperonin subunit 4 (delta) Cct4  
1456573\_x\_at 0.87566 nicotinamide nucleotide transhydrogenase Nnt  
1456574\_at 0.94902 EST AA407452 AA407452  
1456575\_at 1.01874 Necdin Ndn  
1456576\_x\_at 1.02724 "CCR4-NOT transcription complex, subunit 2" Cnot2  
1456577\_x\_at 0.98389 pitrilysin metallopeptidase 1 Pitrm1  
1456578\_x\_at 1.02495 LIM and SH3 protein 1 Lasp1  
1456579\_x\_at 1.02562 RIKEN cDNA 1200003M09 gene 1200003M09Rik  
1456580\_s\_at 0.92538 "ATP synthase, H+ transporting, mitochondrial F1 complex, delta subunit" Atp5d  
1456581\_x\_at 0.96988 guanosine diphosphate (GDP) dissociation inhibitor 2 Gdi2  
1456582\_x\_at 0.90461 RIKEN cDNA 5230400G24 gene /// hypothetical protein LOC637796  
5230400G24Rik /// LOC637796  
1456583\_x\_at 0.89791 transmembrane protein 144 Tmem144

1456584\_x\_at 1.06650 3-phosphoglycerate dehydrogenase /// similar to 3-phosphoglycerate dehydrogenase Phgdh /// LOC382931 /// LOC384524 /// LOC385344 /// LOC627427 /// LOC666422 /// LOC666875 /// LOC668771 /// LOC669671 /// LOC669985 /// LOC670155 /// LOC670187 /// LOC671102 /// LOC671972 /// LOC673015 /// LOC675010  
 1456585\_x\_at 0.93439 RIKEN cDNA E130309D02 gene E130309D02Rik  
 1456586\_x\_at 1.10878 major vault protein Mvp  
 1456587\_x\_at 0.89885 RIKEN cDNA 2010005J08 gene 2010005J08Rik  
 1456588\_x\_at 0.94392 "cytochrome c oxidase, subunit Vb" Cox5b  
 1456589\_x\_at 0.98461 allantoicase Allc  
 1456590\_x\_at 0.99085 "aldo-keto reductase family 1, member B3 (aldose reductase)" Akr1b3  
 1456591\_x\_at 0.94961 A kinase (PRKA) anchor protein 3 Akap3  
 1456592\_at 0.91006 Vacuolar protein sorting 13A (yeast) Vps13a  
 1456593\_at 1.09481 Synaptotagmin-like 2 Sytl2  
 1456594\_at 1.00731 --- ---  
 1456595\_x\_at 1.33677 growth hormone Gh  
 1456596\_at 0.98308 RIKEN cDNA 6430550H21 gene 6430550H21Rik  
 1456597\_at 1.04210 HEAT repeat containing 3 Heatr3  
 1456598\_at 1.05891 similar to PRAME family member 8 /// expressed sequence AU018829 /// similar to PRAME family member 8 LOC545761 /// AU018829 /// LOC546201 /// LOC619753 /// LOC621019 /// LOC622792 /// LOC664993 /// LOC665003 /// LOC665558 /// LOC665616 /// LOC665711 /// LOC665718 /// LOC665723 /// LOC665802 /// LOC666058 /// LOC666140  
 1456599\_at 0.88725 nuclear transport factor 2-like export factor 2 Nxt2  
 1456600\_a\_at 0.96631 ring finger protein 7 Rnf7  
 1456601\_x\_at 1.04314 FXYP domain-containing ion transport regulator 2 Fxyd2  
 1456602\_at 0.81430 RIKEN cDNA 4932417I16 gene 4932417I16Rik  
 1456603\_at 0.90520 RIKEN cDNA 1500005K14 gene 1500005K14Rik  
 1456604\_a\_at 0.93610 protein-L-isoaspartate (D-aspartate) O-methyltransferase 1 Pcmt1  
 1456605\_at 1.06150 "CCAAT/enhancer binding protein (C/EBP), delta" Cebpδ  
 1456606\_a\_at 0.94190 carbohydrate sulfotransferase 11 /// phosphatase and actin regulator 1 Chst11 /// Phactr1

1456607\_at 0.93178 valosin containing protein (p97)/p47 complex interacting protein 1 Vcpi1  
1456608\_at 1.06457 --- ---  
1456609\_at 0.82626 calcium/calmodulin-dependent protein kinase II inhibitor 1 Camk2n1  
1456610\_at 0.92893 jumonji domain containing 3 Jmjd3  
1456611\_at 0.77669 RIKEN cDNA D430015B01 gene D430015B01Rik  
1456612\_at 1.06616 Interleukin 17D II17d  
1456613\_at 0.90128 eukaryotic translation initiation factor 4E binding protein 2 Eif4ebp2  
1456614\_at 0.97704 ACN9 homolog (S. cerevisiae) Acn9  
1456615\_a\_at 1.02198 fetal Alzheimer antigen Falz  
1456616\_a\_at 0.95816 basigin Bsg  
1456617\_a\_at 1.15093 "eukaryotic translation initiation factor 2, subunit 2 (beta)" Eif2s2  
1456618\_at 0.97365 MAP/microtubule affinity-regulating kinase 4 Mark4  
1456619\_at 0.90255 "Lipase, member H" Liph  
1456620\_at 1.17613 "N-acetylglucosamine-1-phosphate transferase, alpha and beta subunits" Gnptab  
1456621\_at 0.79782 RIKEN cDNA D430015B01 gene D430015B01Rik  
1456622\_at 0.83523 calmodulin regulated spectrin-associated protein 1 Camsap1  
1456623\_at 1.11381 "tropomyosin 1, alpha" Tpm1  
1456624\_at 0.78963 "WD repeat domain, phosphoinositide interacting 1" Wipi1  
1456625\_at 0.91531 --- ---  
1456626\_a\_at 1.19957 RIKEN cDNA 1110005A23 gene /// similar to cytokine induced protein 29  
kDa /// similar to cytokine induced protein 29 kDa 1110005A23Rik /// LOC625193 /// LOC636633  
1456627\_at 0.99970 Ubiquilin 2 Ubqln2  
1456628\_x\_at 1.02139 ribosomal protein S24 Rps24  
1456629\_at 1.15143 ankyrin repeat domain 47 Ankrd47  
1456630\_x\_at 0.94828 Son cell proliferation protein Son  
1456631\_at 1.18366 RIKEN cDNA 6430706D22 gene 6430706D22Rik  
1456632\_at 0.94111 B-cell CLL/lymphoma 11A (zinc finger protein) Bcl11a  
1456633\_at 0.98365 "transient receptor potential cation channel, subfamily M, member 3" Trpm3  
1456634\_at 0.84453 RIKEN cDNA 9830001H06 gene 9830001H06Rik  
1456635\_at 1.04444 --- ---  
1456636\_at 0.75191 RIKEN cDNA 4930414L22 gene 4930414L22Rik  
1456637\_at 1.15634 leucine rich repeat transmembrane neuronal 2 Lrrtm2  
1456638\_at 1.05180 WD repeat domain 59 Wdr59  
1456639\_at 1.07785 zinc finger protein 398 Zfp398  
1456640\_at 1.01514 SH3 domain containing ring finger 2 Sh3rf2  
1456641\_at 0.64939 RIKEN cDNA 1190007F08 gene 1190007F08Rik  
1456642\_x\_at 1.05123 S100 calcium binding protein A10 (calpactin) S100a10  
1456643\_at 1.10915 RIKEN cDNA 9230114K14 gene 9230114K14Rik  
1456644\_at 0.96592 RIKEN cDNA 5730528L13 gene 5730528L13Rik  
1456645\_at 1.01663 WD repeat domain 25 Wdr25  
1456646\_at 1.06427 peroxisome biogenesis factor 10 Pex10  
1456647\_a\_at 0.92426 eyes absent 4 homolog (Drosophila) Eya4  
1456648\_at 1.03330 "Mannosidase 1, alpha" Man1a

1456649\_at 1.02387 Sorting nexin 15 Snx15  
1456650\_at 1.16495 "6 days neonate skin cDNA, RIKEN full-length enriched library, clone: A030010B11 product:unclassifiable, full insert sequence" ---  
1456651\_a\_at 1.02109 translocated promoter region Tpr  
1456652\_at 2.27758 denticleless homolog (Drosophila) Dtl  
1456653\_a\_at 1.26167 methylenetetrahydrofolate dehydrogenase (NADP+ dependent) 1-like Mthfd11  
1456654\_at 1.01298 progesterin and adipoQ receptor family member V Paqr5  
1456655\_at 2.38263 Exostoses (multiple) 1 Ext1  
1456656\_at 0.93419 lin-7 homolog A (C. elegans) Lin7a  
1456657\_at 1.48517 expressed sequence AA415437 AA415437  
1456658\_at 1.05462 "actin, alpha 2, smooth muscle, aorta" Acta2  
1456659\_at 1.90289 hypothetical LOC552902 LOC552902  
1456660\_a\_at 1.02605 RIKEN cDNA 0610010F05 gene 0610010F05Rik  
1456661\_at 2.09722 "Jumonji, AT rich interactive domain 2" Jarid2  
1456662\_at 1.67978 Hypothetical protein LOC546058 LOC546058  
1456663\_x\_at 0.87628 TM2 domain containing 2 Tm2d2  
1456664\_x\_at 0.99325 heterogeneous nuclear ribonucleoprotein F /// similar to heterogeneous nuclear ribonucleoprotein F /// similar to heterogeneous nuclear ribonucleoprotein F /// similar to heterogeneous nuclear ribonucleoprotein F Hnrpf /// LOC637008 /// LOC665008 /// LOC672616  
1456665\_at 0.76433 eyes absent 4 homolog (Drosophila) Eya4  
1456666\_at 0.88995 RIKEN cDNA 2610020C07 gene 2610020C07Rik  
1456667\_at 1.62503 Huntington disease gene homolog Hdh  
1456668\_at 1.61868 "Zinc finger, CCHC domain containing 11" Zcchc11  
1456669\_at 1.03872 Transcribed locus ---  
1456670\_at 0.99806 RIKEN cDNA A930007A09 gene A930007A09Rik  
1456671\_at 0.98508 transforming growth factor beta regulated gene 3 Tbrg3  
1456672\_at 1.08900 "CDNA, clone:Y1G0143G21, strand:unspecified" ---  
1456673\_at 1.04658 expressed sequence AL022943 AL022943  
1456674\_at 1.04179 RIKEN cDNA E130016E03 gene E130016E03Rik  
1456675\_at 0.88559 expressed sequence AA536749 AA536749  
1456676\_a\_at 0.95848 "6-phosphofructo-2-kinase/fructose-2,6-biphosphatase 3" Pfkfb3  
1456677\_at 1.25815 Hect domain and RLD 4 Herc4  
1456678\_at 1.02423 Src family associated phosphoprotein 1 Scap1  
1456679\_at 1.10952 Oligonucleotide/oligosaccharide-binding fold containing 1 Obfc1  
1456680\_at 1.01364 "UDP-GlcNAc:betaGal beta-1,3-N-acetylglucosaminyltransferase 6 (core 3 synthase)" B3gnt6  
1456681\_at 0.97428 expressed sequence AI848149 AI848149  
1456682\_at 0.95471 LON peptidase N-terminal domain and ring finger 2 Lonrf2  
1456683\_at 1.59129 "SAFB-like, transcription modulator" Sltm  
1456684\_at 1.02476 transmembrane protein 74 Tmem74  
1456685\_at 0.97216 neuron specific gene family member 2 Nsg2  
1456686\_at 1.38329 Zinc finger homeobox 1a Zfhx1a

1456687\_at 1.11408 Retinitis pigmentosa 9 homolog (human) Rp9h  
1456688\_at 1.11018 Topoisomerase (DNA) II beta Top2b  
1456689\_at 1.40137 Ring finger protein 10 Rnf10  
1456690\_at 1.00036 --- ---  
1456691\_s\_at 1.01863 steroid 5 alpha-reductase 2-like Srd5a2l  
1456692\_at 0.81068 Bromodomain containing 1 Brd1  
1456693\_at 0.96527 RIKEN cDNA 4933406F09 gene 4933406F09Rik  
1456694\_x\_at 1.09814 "protein tyrosine phosphatase, non-receptor type 6" Ptpn6  
1456695\_x\_at 0.90474 anaphase-promoting complex subunit 5 Anapc5  
1456696\_x\_at 1.20026 "RMI1, RecQ mediated genome instability 1, homolog (S. cerevisiae)" Rmi1  
1456697\_x\_at 0.90920 cyclin D binding myb-like transcription factor 1 Dmtf1  
1456698\_s\_at 1.01128 heterogeneous nuclear ribonucleoprotein D-like Hnrpdl  
1456699\_s\_at 0.98185 RIKEN cDNA A730098D12 gene A730098D12Rik  
1456700\_x\_at 0.92873 "0 day neonate cerebellum cDNA, RIKEN full-length enriched library, clone: C230070N19 product:myristoylated alanine rich protein kinase C substrate, full insert sequence" ---  
1456701\_at 0.99531 RIKEN cDNA B230208H17 gene B230208H17Rik  
1456702\_x\_at 0.91349 "methionine adenosyltransferase II, alpha" Mat2a  
1456703\_at 1.14982 "DNA segment, Chr 5, ERATO Doi 301, expressed" D5Ertd301e  
1456704\_at 1.13334 RIKEN cDNA 9530010C24 gene 9530010C24Rik  
1456705\_at 0.98067 Zinc finger protein 532 Zfp532  
1456706\_at 2.06969 RIKEN cDNA 4833441D16 gene 4833441D16Rik  
1456707\_at 0.98990 "Adult male corpora quadrigemina cDNA, RIKEN full-length enriched library, clone:B230387P15 product:unclassifiable, full insert sequence" ---  
1456708\_at 1.02850 RIKEN cDNA 2610028E06 gene 2610028E06Rik  
1456709\_at 1.00667 oligophrenin 1 Ophn1  
1456710\_at 0.97613 Protocadherin beta 11 Pcdhb11  
1456711\_at 1.07667 RIKEN cDNA 4932425I24 gene 4932425I24Rik  
1456712\_at 1.06972 ligand dependent nuclear receptor corepressor-like Lcorl  
1456713\_at 1.48594 "polymerase (DNA directed), alpha 2" Pola2  
1456714\_at 0.94680 WW domain containing E3 ubiquitin protein ligase 2 Wwp2  
1456715\_at 1.40549 "Pam, highwire, rpm 1" Phr1  
1456716\_s\_at 1.01683 RIKEN cDNA 3110002H16 gene 3110002H16Rik  
1456717\_at 1.97277 TEA domain family member 1 Tead1  
1456718\_at 0.94400 transmembrane protein 56 Tmem56  
1456719\_at 0.85719 "2 cells egg cDNA, RIKEN full-length enriched library, clone:B020004L17 product:unclassifiable, full insert sequence" ---  
1456720\_at 1.07892 RIKEN cDNA 1500041B16 gene 1500041B16Rik  
1456721\_at 0.65966 "gene model 837, (NCBI)" Gm837  
1456722\_at 0.96042 chordin-like 1 Chrdl1  
1456723\_at 1.00084 Proline rich 14 Prr14  
1456724\_x\_at 0.93816 WD repeat domain 79 Wdr79  
1456725\_x\_at 0.98489 villin 2 Vil2  
1456726\_x\_at 0.92749 glutaminyl-tRNA synthetase Qars

1456727\_a\_at 0.98918 "casein kinase 1, delta" Csnk1d  
1456728\_x\_at 1.00208 aconitase 1 Aco1  
1456729\_x\_at 0.98605 regulator of telomere elongation helicase 1 Rtel1  
1456730\_x\_at 0.99435 actin-like 6A Actl6a  
1456731\_x\_at 0.93951 Polymerase (RNA) III (DNA directed) polypeptide K Polr3k  
1456732\_at 0.90278 Glycerol-3-phosphate dehydrogenase 1 (soluble) Gpd1  
1456733\_x\_at 0.82900 "serine (or cysteine) peptidase inhibitor, clade H, member 1" Serpinh1  
1456734\_at 1.04121 thioredoxin 1 Txn1  
1456735\_x\_at 0.59954 acid phosphatase-like 2 Acpl2  
1456736\_x\_at 0.90644 RIKEN cDNA 5230400G24 gene 5230400G24Rik  
1456737\_x\_at 0.93654 acetyl-Coenzyme A acyltransferase 1A Acaa1a  
1456738\_s\_at 1.14005 brain protein 16 Brp16  
1456739\_x\_at 1.02354 "armadillo repeat containing, X-linked 2" Armcx2  
1456740\_x\_at 0.90305 component of oligomeric golgi complex 1 Cog1  
1456741\_s\_at 0.94214 glycoprotein m6a Gpm6a  
1456742\_x\_at 1.02335 transmembrane 9 superfamily member 2 Tm9sf2  
1456743\_x\_at 0.96984 mortality factor 4 like 2 /// similar to Mortality factor 4-like protein 2 (MORF-related gene X protein) (Transcription factor-like protein MRGX) (Sid 393) /// similar to Mortality factor 4-like protein 2 (MORF-related gene X protein) (Transcription factor-like protein MRGX) (Sid 393) Morf4l2 /// LOC433261 /// LOC677515  
1456744\_x\_at 1.10917 folliculin Flcn  
1456745\_x\_at 0.93367 ERGIC and golgi 3 Ergic3  
1456746\_a\_at 0.86050 Cd99 antigen-like 2 Cd99l2  
1456747\_x\_at 0.95796 Cd99 antigen-like 2 Cd99l2  
1456748\_a\_at 0.94920 4-nitrophenylphosphatase domain and non-neuronal SNAP25-like protein homolog 1 (C. elegans) Nipsnap1  
1456749\_at 1.00575 Transcribed locus ---  
1456750\_at 0.93131 RIKEN cDNA B230303O12 gene B230303O12Rik  
1456751\_x\_at 0.92625 hypothetical protein A530021J07 A530021J07  
1456752\_at 1.20393 "13 days embryo heart cDNA, RIKEN full-length enriched library, clone: D330038P10 product:Mus musculus Nespas mRNA, full insert sequence" ---  
1456753\_at 0.86945 --- ---  
1456754\_at 1.00465 "zinc finger, FYVE domain containing 20" Zfyve20  
1456755\_at 0.92935 "trafficking protein, kinesin binding 1" Trak1  
1456756\_at 0.87533 RIKEN cDNA E430016P22 gene E430016P22Rik  
1456757\_at 1.06732 RIKEN cDNA G630024C07 gene G630024C07Rik  
1456758\_at 2.63128 RIKEN cDNA 9930017N22 gene 9930017N22Rik  
1456759\_at 1.02802 "16 days neonate cerebellum cDNA, RIKEN full-length enriched library, clone:9630048A22 product:unclassifiable, full insert sequence" ---  
1456760\_at 0.87461 CDNA clone IMAGE:6813709 ---  
1456761\_at 1.53580 RIKEN cDNA D630030B22 gene D630030B22Rik  
1456762\_at 0.89174 --- ---  
1456763\_at 0.75563 expressed sequence AA536749 AA536749

|              |         |                                                                                                                                   |               |
|--------------|---------|-----------------------------------------------------------------------------------------------------------------------------------|---------------|
| 1456764_at   | 1.02666 | "solute carrier family 35, member F3"                                                                                             | Slc35f3       |
| 1456765_at   | 0.91332 | hypothetical protein 6430511F03                                                                                                   | 6430511F03    |
| 1456766_at   | 0.89770 | RIKEN cDNA C330001K17 gene                                                                                                        | C330001K17Rik |
| 1456767_at   | 0.81869 | leucine rich repeat and fibronectin type III domain containing 3                                                                  | Lrn3          |
| 1456768_a_at | 0.95612 | multimerin 2                                                                                                                      | Mmrn2         |
| 1456769_at   | 1.31098 | dual specificity phosphatase 3 (vaccinia virus phosphatase VH1-related)                                                           | Dusp3         |
| 1456770_at   | 0.96059 | zinc finger protein 14                                                                                                            | Zfp14         |
| 1456771_at   | 1.07546 | zyg-11 homolog B (C. elegans)-like                                                                                                | Zyg11bl       |
| 1456772_at   | 0.93447 | neutrophil cytosolic factor 1                                                                                                     | Ncf1          |
| 1456773_at   | 1.12746 | nucleoporin like 2                                                                                                                | Nupl2         |
| 1456774_at   | 0.92475 | "protein phosphatase 1, regulatory (inhibitor) subunit 13 like"                                                                   | Ppp1r13l      |
| 1456775_at   | 1.13745 | integrator complex subunit 8                                                                                                      | Ints8         |
| 1456776_at   | 1.02106 | spermatogenesis associated 2                                                                                                      | Spata2        |
| 1456777_at   | 1.00006 | maltase-glucoamylase                                                                                                              | Mgam          |
| 1456778_at   | 1.49751 | Neuropilin 2                                                                                                                      | Nrp2          |
| 1456779_a_at | 1.05993 | RIKEN cDNA 4930414L22 gene                                                                                                        | 4930414L22Rik |
| 1456780_at   | 1.34462 | Beta-transducin repeat containing protein                                                                                         | Btrc          |
| 1456781_at   | 1.03870 | "10 days neonate cortex cDNA, RIKEN full-length enriched library, clone: A830044L07 product:unclassifiable, full insert sequence" | ---           |
| 1456782_at   | 1.15031 | "transcriptional adaptor 1 (HFI1 homolog, yeast) like"                                                                            | Tada1l        |
| 1456783_at   | 0.95151 | RIKEN cDNA 9330107J05 gene                                                                                                        | 9330107J05Rik |
| 1456784_at   | 1.06162 | hypothetical protein LOC623781                                                                                                    | LOC623781     |
| 1456785_at   | 0.85872 | "cofactor required for Sp1 transcriptional activation, subunit 2"                                                                 | Crsp2         |
| 1456786_at   | 1.09510 | LIM domain binding 2                                                                                                              | Ldb2          |
| 1456787_at   | 0.91310 | ---                                                                                                                               | ---           |
| 1456788_at   | 0.89178 | mitochondrial ribosomal protein L54                                                                                               | Mrpl54        |
| 1456789_at   | 0.90471 | Zinc finger protein 462                                                                                                           | Zfp462        |
| 1456790_at   | 1.02514 | EST AA407452                                                                                                                      | AA407452      |
| 1456791_at   | 1.04564 | EST AA407452                                                                                                                      | AA407452      |
| 1456792_at   | 1.01768 | "TBC1 domain family, member 2"                                                                                                    | Tbc1d2        |
| 1456793_at   | 1.08770 | cytokine like 1                                                                                                                   | Cyt1          |
| 1456794_at   | 1.07175 | RIKEN cDNA E230016M11 gene                                                                                                        | E230016M11Rik |
| 1456795_at   | 1.06545 | RIKEN cDNA D330027G24 gene                                                                                                        | D330027G24Rik |
| 1456796_at   | 0.99599 | snail homolog 3 (Drosophila)                                                                                                      | Snai3         |
| 1456797_at   | 0.93754 | "clathrin, light polypeptide (Lcb)"                                                                                               | Cltb          |
| 1456798_at   | 0.90292 | RIKEN cDNA 9330118A15 gene                                                                                                        | 9330118A15Rik |
| 1456799_at   | 0.97576 | RIKEN cDNA E130110O22 gene                                                                                                        | E130110O22Rik |
| 1456800_a_at | 0.91201 | RIKEN cDNA D130029J02 gene                                                                                                        | D130029J02Rik |
| 1456801_at   | 0.97475 | "16 days neonate thymus cDNA, RIKEN full-length enriched library, clone: A130037H12 product:unclassifiable, full insert sequence" | ---           |
| 1456802_at   | 1.00075 | ring finger protein 133                                                                                                           | Rnf133        |
| 1456803_at   | 1.26173 | Polymerase (RNA) III (DNA directed) polypeptide C                                                                                 | Polr3c        |
| 1456804_at   | 0.96720 | hypothetical protein LOC627821                                                                                                    | Av381130      |



1456805\_at 1.04012 RIKEN cDNA C030010B13 gene C030010B13Rik  
 1456806\_at 1.57906 RIKEN cDNA A130010C12 gene A130010C12Rik  
 1456807\_at 0.92916 "protein phosphatase 1, regulatory (inhibitor) subunit 3E" Ppp1r3e  
 1456808\_at 2.58224 RIKEN cDNA 4933426M11 gene 4933426M11Rik  
 1456809\_at 0.97857 "Adult male thymus cDNA, RIKEN full-length enriched library,  
 clone:5830435O18 product:unclassifiable, full insert sequence" ---  
 1456810\_at 2.08128 vacuolar protein sorting 54 (yeast) Vps54  
 1456811\_at 0.68854 CXXC finger 4 Cxxc4  
 1456812\_at 0.92084 "ATP-binding cassette, sub-family D (ALD), member 2" Abcd2  
 1456813\_at 1.00777 "Adult male hypothalamus cDNA, RIKEN full-length enriched library, clone:  
 A230069E07 product:unclassifiable, full insert sequence" ---  
 1456814\_at 0.94076 RIKEN cDNA 1110014J01 gene 1110014J01Rik  
 1456815\_at 0.93895 forkhead box N1 Foxn1  
 1456816\_at 1.27692 Retinoic acid induced 17 Rai17  
 1456817\_at 0.98614 "Adult retina cDNA, RIKEN full-length enriched library, clone:A930002A02  
 product:unclassifiable, full insert sequence" ---  
 1456818\_at 0.96407 serine/threonine kinase 32A Stk32a  
 1456819\_at 1.07100 RIKEN cDNA G630049C14 gene G630049C14Rik  
 1456820\_at 1.01864 "9 days embryo whole body cDNA, RIKEN full-length enriched library, clone:  
 D030040D24 product:unclassifiable, full insert sequence" ---  
 1456821\_at 1.23779 RIKEN cDNA 4932439K10 gene 4932439K10Rik  
 1456822\_at 1.56901 RAD23b homolog (S. cerevisiae) Rad23b  
 1456823\_at 0.89916 "gene model 70, (NCBI)" Gm70  
 1456824\_at 0.95976 zinc finger protein 612 Zfp612  
 1456825\_at 0.92562 WD repeat domain 33 Wdr33  
 1456826\_at 0.98622 TAO kinase 2 Taok2  
 1456827\_at 0.82716 expressed sequence AA987161 AA987161  
 1456828\_at 1.05816 RIKEN cDNA C030023E24 gene C030023E24Rik  
 1456829\_at 0.83044 paraneoplastic antigen MA3 Pnma3  
 1456830\_at 1.20203 "protein phosphatase 1, regulatory (inhibitor) subunit 2" Ppp1r2  
 1456831\_at 0.99847 AT rich interactive domain 5B (Mrf1 like) Arid5b  
 1456832\_at 1.47498 Alpha thalassemia/mental retardation syndrome X-linked homolog (human)  
 Atrx  
 1456833\_at 0.96649 G protein-coupled receptor 17 Gpr17  
 1456834\_at 1.00863 IBR domain containing 2 Ibrdc2  
 1456835\_at 0.90992 Hypothetical protein LOC624549 LOC624549  
 1456836\_at 1.03921 IL2-inducible T-cell kinase Itk  
 1456837\_at 0.85899 RIKEN cDNA A830007L07 gene A830007L07Rik  
 1456838\_at 0.91297 cDNA sequence BC072620 BC072620  
 1456839\_at 0.96665 GRAM domain containing 1B Gramd1b  
 1456840\_at 1.09193 --- ---  
 1456841\_at 1.12690 "PREDICTED: Mus musculus similar to Kinesin-like protein KIF2C (Mitotic  
 centromere-associated kinesin) (MCAK) (LOC242914), mRNA" ---

1456842\_at 0.94362 "PREDICTED: Mus musculus hypothetical protein LOC628013 (LOC628013), mRNA" ---

1456843\_at 1.31473 Yamaguchi sarcoma viral (v-yes) oncogene homolog 1 Yes1

1456844\_at 1.07228 "calcium/calmodulin-dependent protein kinase II, delta" Camk2d

1456845\_at 0.90510 Oxidase assembly 1-like Oxa1l

1456846\_at 0.92800 similar to RP58 protein LOC382639

1456847\_at 1.00834 CD160 antigen Cd160

1456848\_at 1.13689 --- ---

1456849\_at 1.44014 --- ---

1456850\_at 0.93719 --- ---

1456851\_at 0.98117 Forkhead box P1 Foxp1

1456852\_at 1.02064 polyadenylate binding protein-interacting protein 1 Paip1

1456853\_at 0.91674 Inhibitor of four 1 (Mif1) ---

1456854\_at 1.45652 neuralized-like homolog (Drosophila) Neurl

1456855\_at 1.03537 --- ---

1456856\_at 0.97486 "protein tyrosine phosphatase, receptor type, f polypeptide (PTPRF), interacting protein (liprin), alpha 2" Ppfia2

1456857\_at 1.19719 RIKEN cDNA 1500011B03 gene 1500011B03Rik

1456858\_at 0.95078 G protein-coupled receptor 149 Gpr149

1456859\_at 0.99951 limb and neural patterns Lnp

1456860\_at 0.97784 cell division cycle 26 Cdc26

1456861\_at 1.02787 "Activated spleen cDNA, RIKEN full-length enriched library, clone: F830206P12 product:hypothetical Cytochrome c heme-binding site containing protein, full insert sequence" ---

1456862\_at 1.19384 sine oculis-related homeobox 4 homolog (Drosophila) Six4

1456863\_at 1.09457 Eph receptor A4 Epha4

1456864\_at 1.86939 --- ---

1456865\_x\_at 0.95191 RRS1 ribosome biogenesis regulator homolog (S. cerevisiae) Rrs1

1456866\_x\_at 1.04991 RIKEN cDNA 1700027D21 gene 1700027D21Rik

1456867\_x\_at 0.92627 ERGIC and golgi 3 Ergic3

1456868\_at 1.29440 RIKEN cDNA 2900073G15 gene 2900073G15Rik

1456869\_at 0.91409 RIKEN cDNA 2210018M03 gene 2210018M03Rik

1456870\_at 0.94191 RIKEN cDNA A430107D22 gene A430107D22Rik

1456871\_a\_at 1.03067 PHD finger protein 20-like 1 Phf20l1

1456872\_a\_at 0.91880 RIKEN cDNA D230010M03 gene D230010M03Rik

1456873\_at 0.88477 chloride intracellular channel 5 Clic5

1456874\_at 0.91719 fibronectin leucine rich transmembrane protein 2 Flrt2

1456875\_at 1.00671 RIKEN cDNA 1810013L24 gene 1810013L24Rik

1456876\_at 0.96986 --- ---

1456877\_at 0.80889 dual oxidase 1 /// similar to dual oxidase 1 Duox1 /// LOC640578

1456878\_at 0.62619 expressed sequence AI646023 AI646023

1456879\_at 1.01119 RIKEN cDNA C130022K22 gene C130022K22Rik

1456880\_at 1.56481 "Splicing factor, arginine/serine-rich 8" Sfrs8

1456881\_at 0.85335 neurobeachin-like 2 Nbeal2  
1456882\_at 0.95638 SRY-box containing gene 12 Sox12  
1456883\_at 0.96035 storkhead box 1 Stox1  
1456884\_at 0.86267 Hypothetical LOC67660 LOC67660  
1456885\_at 0.98741 Transcribed locus ---  
1456886\_at 1.03521 Brain protein 44-like Brp44l  
1456887\_at 0.93021 chemokine-like receptor 1 Cmklr1  
1456888\_at 1.27658 "6-phosphofructo-2-kinase/fructose-2,6-biphosphatase 4" Pfkfb4  
1456889\_at 0.97309 "PREDICTED: Mus musculus similar to aspartoacylase-3 (LOC629627), mRNA" ---  
1456890\_at 1.03840 DEAD (Asp-Glu-Ala-Asp) box polypeptide 58 Ddx58  
1456891\_at 1.12365 DENN/MADD domain containing 2C Dennd2c  
1456892\_at 0.95485 RIKEN cDNA D030036P13 gene D030036P13Rik  
1456893\_at 0.88011 "Adult male liver tumor cDNA, RIKEN full-length enriched library, clone: C730013D23 product:unclassifiable, full insert sequence" ---  
1456894\_at 1.09356 RIKEN cDNA C130039O16 gene C130039O16Rik  
1456895\_at 1.01874 CD209b antigen Cd209b  
1456896\_at 1.18490 RIKEN cDNA 6720462K09 gene 6720462K09Rik  
1456897\_at 1.17168 Stam binding protein like 1 Stambpl1  
1456898\_at 1.00261 purine rich element binding protein A Pura  
1456899\_at 0.96430 RIKEN cDNA 1500004F05 gene 1500004F05Rik  
1456900\_at 0.95108 --- ---  
1456901\_at 0.99016 "a disintegrin-like and metallopeptidase (reprolysin type) with thrombospondin type 1 motif, 20" Adamts20  
1456902\_at 0.93131 Special AT-rich sequence binding protein 1 Satb1  
1456903\_at 1.00212 pentraxin related gene Ptx3  
1456904\_at 1.06751 Transcribed locus ---  
1456905\_at 0.91842 coiled-coil domain containing 24 Ccdc24  
1456906\_at 1.51346 RIKEN cDNA 4833432P19 gene 4833432P19Rik  
1456907\_at 0.97101 chemokine (C-X-C motif) ligand 9 Cxcl9  
1456908\_at 1.08459 cDNA sequence BC023202 BC023202  
1456909\_at 1.93693 similar to Glucose-6-phosphate isomerase (GPI) (Phosphoglucose isomerase) (PGI) (Phosphohexose isomerase) (PHI) (Neuroleukin) (NLK) LOC676974  
1456910\_at 0.95523 Transcribed locus ---  
1456911\_at 0.84840 CLIP associating protein 2 Clasp2  
1456912\_at 0.92507 zinc finger protein 691 Zfp691  
1456913\_at 1.52236 Tropomodulin 3 Tmod3  
1456914\_at 1.35113 --- ---  
1456915\_at 1.02264 RIKEN cDNA D930005D10 gene D930005D10Rik  
1456916\_at 1.18718 Nuclear receptor-binding SET-domain protein 1 Nsd1  
1456917\_at 1.48453 ADP-ribosylation factor guanine nucleotide-exchange factor 1(brefeldin A-inhibited) Arfgef1  
1456918\_at 2.57374 Ras association (RalGDS/AF-6) and pleckstrin homology domains 1 Raph1

1456919\_at 1.09808 RIKEN cDNA A930013B10 gene A930013B10Rik  
1456920\_at 1.21398 --- ---  
1456921\_at 1.01014 Ataxin 2 binding protein 1 A2bp1  
1456922\_at 1.07382 RIKEN cDNA 4933437K13 gene 4933437K13Rik  
1456923\_at 0.97717 "transient receptor potential cation channel, subfamily M, member 3" Trpm3  
1456924\_at 1.10143 expressed sequence AW492981 AW492981  
1456925\_at 0.82356 --- ---  
1456926\_at 0.87139 regulating synaptic membrane exocytosis 4 Rims4  
1456927\_at 1.78582 microtubule associated serine/threonine kinase 2 Mast2  
1456928\_at 1.04268 --- ---  
1456929\_at 0.98165 CDNA sequence BC042782 BC042782  
1456930\_at 0.86387 calmodulin regulated spectrin-associated protein 1 Camsap1  
1456931\_at 0.94919 expressed sequence C85363 C85363  
1456932\_at 0.97943 Hypothetical protein B430201F14 B430201F14  
1456933\_at 1.12941 "Smg-7 homolog, nonsense mediated mRNA decay factor (C. elegans)"  
Smg7  
1456934\_at 1.07872 --- ---  
1456935\_at 0.89636 expressed sequence AI606473 AI606473  
1456936\_at 1.08359 calcium binding protein 4 Cabp4  
1456937\_at 1.06106 cadherin-like 26 Cdh26  
1456938\_at 1.01087 "SWI/SNF related, matrix associated, actin dependent regulator of chromatin,  
subfamily b, member 1" Smarcb1  
1456939\_at 1.00737 RIKEN cDNA 1700129I04 gene 1700129I04Rik  
1456940\_at 0.96968 "solute carrier family 43, member 2" Slc43a2  
1456941\_at 0.99304 telomerase reverse transcriptase Tert  
1456942\_x\_at 1.14012 hypothetical protein LOC668339 LOC668339  
1456943\_a\_at 1.00913 "Adult male corpora quadrigemina cDNA, RIKEN full-length enriched library,  
clone:B230215D24 product:unclassifiable, full insert sequence" ---  
1456944\_at 1.13135 "potassium voltage gated channel, Shaw-related subfamily, member 1" Kcnc1  
1456945\_at 0.98693 nudix (nucleoside diphosphate linked moiety X)-type motif 6 Nudt6  
1456946\_at 0.92383 RIKEN cDNA 4831416G18 gene 4831416G18Rik  
1456947\_at 1.41388 "Platelet-activating factor acetylhydrolase, isoform 1b, beta1 subunit" Pafah1b1  
1456948\_at 1.11225 "adaptor-related protein complex AP-4, epsilon 1" Ap4e1  
1456949\_at 0.97843 FCH and double SH3 domains 2 Fchsd2  
1456950\_at 0.78232 Alstrom syndrome 1 homolog (human) Alms1  
1456951\_at 1.04332 "Adult male testis cDNA, RIKEN full-length enriched library,  
clone:4921513I01 product:unclassifiable, full insert sequence" ---  
1456952\_at 1.74396 AT rich interactive domain 1B (Swi1 like) Arid1b  
1456953\_at 1.01040 "12 days embryo spinal ganglion cDNA, RIKEN full-length enriched library,  
clone:D130062H10 product:unclassifiable, full insert sequence" ---  
1456954\_at 1.11443 "potassium voltage-gated channel, shaker-related, subfamily, member 6" Kcna6  
1456955\_at 1.63058 --- ---  
1456956\_at 2.27848 "zinc finger protein, subfamily 1A, 2 (Helios)" Zfpn1a2

1456957\_at 1.09240 --- ---  
1456958\_at 1.04116 RIKEN cDNA C230072F16 gene C230072F16Rik  
1456959\_at 0.92063 RIKEN cDNA 1700034H15 gene 1700034H15Rik  
1456960\_at 3.16749 Adenosine kinase Adk  
1456961\_at 0.85251 enhancer of yellow 2 homolog (Drosophila) Eny2  
1456962\_at 1.18817 contactin 2 Cntn2  
1456963\_at 0.96175 RIKEN cDNA 1110039B18 gene 1110039B18Rik  
1456964\_at 0.99418 RNA binding motif protein 12 Rbm12  
1456965\_at 0.91103 --- ---  
1456966\_at 0.97172 CDNA sequence BC028528 BC028528  
1456967\_at 0.95690 tripartite motif-containing 66 Trim66  
1456968\_at 1.04917 Actinin alpha 2 Actn2  
1456969\_at 1.01216 RIKEN cDNA 9530092O11 gene 9530092O11Rik  
1456970\_at 0.80257 "Cadherin 7, type 2" Cdh7  
1456971\_at 1.01155 "solute carrier family 1 (glutamate transporter), member 7" Slc1a7  
1456972\_at 1.10174 expressed sequence C80256 C80256  
1456973\_at 1.41332 AT rich interactive domain 5B (Mrf1 like) Arid5b  
1456974\_at 0.99113 "one cut domain, family member 1" Onecut1  
1456975\_at 1.49408 TAO kinase 1 Taok1  
1456976\_at 1.03925 wingless-related MMTV integration site 5A Wnt5a  
1456977\_at 0.91773 --- ---  
1456978\_s\_at 0.93208 "DNA segment, Chr 19, ERATO Doi 652, expressed" D19Ertd652e  
1456979\_at 0.98595 Zinc fingers and homeoboxes 3 Zhx3  
1456980\_at 1.01009 RIKEN cDNA 9830134C10 gene 9830134C10Rik  
1456981\_at 0.79363 transmembrane channel-like gene family 7 Tmc7  
1456982\_at 0.84339 RIKEN cDNA 6430562O15 gene 6430562O15Rik  
1456983\_at 2.32714 Trichorhinophalangeal syndrome I (human) Trps1  
1456984\_at 0.95893 sex comb on midleg-like 2 (Drosophila) Scml2  
1456985\_at 1.32789 "Deoxynucleotidyltransferase, terminal, interacting protein 1" Dnttip1  
1456986\_at 1.05291 Zinc finger and BTB domain containing 16 Zbtb16  
1456987\_at 1.07825 RIKEN cDNA 4932418E24 gene 4932418E24Rik  
1456988\_at 1.00086 expressed sequence AI848258 AI848258  
1456989\_at 1.01332 oxoglutarate (alpha-ketoglutarate) receptor 1 Oxgr1  
1456990\_at 0.95187 "0 day neonate thymus cDNA, RIKEN full-length enriched library, clone:  
A430015G07 product:unclassifiable, full insert sequence" ---  
1456991\_at 2.72829 Cobl-like 1 Cobll1  
1456992\_at 1.33400 ubiquitin protein ligase E3C Ube3c  
1456993\_at 1.30544 "DNA segment, Chr 2, ERATO Doi 640, expressed" D2Ertd640e  
1456994\_at 0.96741 Ras association (RalGDS/AF-6) domain family 1 Rassf1  
1456995\_at 1.01467 RIKEN cDNA 2700045P11 gene 2700045P11Rik  
1456996\_at 1.10087 RIKEN cDNA 1190005F20 gene 1190005F20Rik  
1456997\_at 1.14002 Nuclear receptor coactivator 5 Ncoa5  
1456998\_at 1.00271 "7 days neonate cerebellum cDNA, RIKEN full-length enriched library, clone:

A730081K04 product:unclassifiable, full insert sequence" ---

1456999\_at 1.07472 "WD repeat domain, phosphoinositide interacting 2" Wipi2

1457000\_at 0.96547 cDNA sequence BC060267 BC060267

1457001\_at 1.02714 centromere protein K Cenpk

1457002\_at 1.03929 zinc finger protein 408 Zfp408

1457003\_at 0.94002 expressed sequence AW490526 AW490526

1457004\_at 0.91736 "DNA segment, Chr 15, Wayne State University 169, expressed" D15Wsu169e

1457005\_at 1.03682 mitochondrial methionyl-tRNA formyltransferase Mtfmt

1457006\_at 1.03731 RIKEN cDNA 1700106J12 gene 1700106J12Rik

1457007\_at 1.58068 Nuclear receptor co-repressor 1 Ncor1

1457008\_at 0.94151 "cholinergic receptor, nicotinic, beta polypeptide 4" Chrn4

1457009\_at 0.95543 Rho-related BTB domain containing 3 Rhobtb3

1457010\_at 1.13802 RIKEN cDNA 3010001F23 gene 3010001F23Rik

1457011\_at 1.02095 Transcribed locus ---

1457012\_at 1.02043 developing brain homeobox 1 Dbx1

1457013\_at 0.93293 GTPase activating RANGAP domain-like 1 Garnl1

1457014\_x\_at 0.93891 "Solute carrier family 16 (monocarboxylic acid transporters), member 8" Slc16a8

1457015\_at 1.08591 RIKEN cDNA A230070E04 gene A230070E04Rik

1457016\_at 0.86362 Transcribed locus ---

1457017\_at 0.98192 --- ---

1457018\_at 0.97231 "Potassium large conductance calcium-activated channel, subfamily M, alpha member 1" Kcnma1

1457019\_s\_at 1.01721 retinol dehydrogenase 14 (all-trans and 9-cis) Rdh14

1457020\_at 1.40530 GC-rich promoter binding protein 1-like 1 Gpbp111

1457021\_x\_at 0.99278 anti-Mullerian hormone type 2 receptor Amhr2

1457022\_at 1.02579 "Dystrophin, muscular dystrophy" Dmd

1457023\_at 0.90010 RIKEN cDNA 5830411G16 gene 5830411G16Rik

1457024\_x\_at 0.86118 "solute carrier family 35 (UDP-galactose transporter), member 2" Slc35a2

1457025\_at 0.93522 RIKEN cDNA 4833413O15 gene 4833413O15Rik

1457026\_at 1.01096 "lipase, member H" Liph

1457027\_at 0.95492 dehydrogenase E1 and transketolase domain containing 1 Dhktd1

1457028\_at 0.72950 RIKEN cDNA A430033K04 gene A430033K04Rik

1457029\_at 0.99494 RIKEN cDNA C030010B13 gene C030010B13Rik

1457030\_at 1.06037 miRNA containing gene Mirg

1457031\_at 0.98223 fibronectin type III and SPRY domain containing 2 Fsd2

1457032\_at 0.95947 adenylate kinase 5 Ak5

1457033\_at 0.78214 "gene model 397, (NCBI) /// Mus musculus sequence XM\_486399 /// similar to zinc finger and SCAN domain containing 4 /// similar to zinc finger and SCAN domain containing 4 /// similar to zinc finger and SCAN domain containing 4" Gm397 /// XM\_486399 /// LOC545913 /// LOC632758 /// LOC665902 /// LOC665913

1457034\_at 0.96141 "DNA segment, Chr 14, Abbott 1 expressed" D14Abble

1457035\_at 0.98021 expressed sequence AI607873 AI607873

1457036\_at 1.74042 similar to upstream transcription factor 2 LOC639063  
1457037\_at 0.97983 "gene model 1103, (NCBI)" Gm1103  
1457038\_at 0.94687 Fras1 related extracellular matrix protein 2 Frem2  
1457039\_at 1.01402 "cat eye syndrome chromosome region, candidate 2 homolog (human)"  
Cecr2  
1457040\_at 0.92144 "leucine-rich repeat LGI family, member 2" Lgi2  
1457041\_at 1.13184 RIKEN cDNA 1700026B20 gene 1700026B20Rik  
1457042\_at 0.96485 EST AI256396 AI256396  
1457043\_at 0.97305 "beta 1,3-galactosyltransferase-like" B3galt1  
1457044\_at 1.02662 RIKEN cDNA 4732474O15 gene 4732474O15Rik  
1457045\_at 1.11795 UDP-N-acetyl-alpha-D-galactosamine:polypeptide N-  
acetylgalactosaminyltransferase 13 Galnt13  
1457046\_s\_at 0.95925 expressed sequence C77370 C77370  
1457047\_at 1.13619 U1 small nuclear ribonucleoprotein polypeptide A Snrp70  
1457048\_at 0.92789 G protein-coupled receptor 103 Gpr103  
1457049\_at 0.96630 "VATPase, H+ transporting, lysosomal V1 subunit E1" Atp6v1e1  
1457050\_at 1.02047 RIKEN cDNA 1700129O19 gene 1700129O19Rik  
1457051\_at 0.96543 tripartite motif protein 27 Trim27  
1457052\_at 0.94401 expressed sequence AW536275 AW536275  
1457053\_at 1.33599 CDNA sequence BC016423 BC016423  
1457054\_a\_at 0.86141 RIKEN cDNA D130020L05 gene D130020L05Rik  
1457055\_at 1.05311 Nucleotide binding protein 1 Nubp1  
1457056\_at 0.90431 Formiminotransferase cyclodeaminase Ftcd  
1457057\_at 0.96456 RIKEN cDNA 1700042G07 gene 1700042G07Rik  
1457058\_at 0.53329 "a disintegrin-like and metallopeptidase (reprolysin type) with thrombospondin  
type 1 motif, 2" Adamts2  
1457059\_at 1.04182 zinc finger protein 438 Zfp438  
1457060\_at 0.88615 ankyrin repeat and sterile alpha motif domain containing 1B /// similar to AIDA-  
1b Anks1b /// LOC544718  
1457061\_at 0.96970 glucocorticoid induced transcript 1 Glcci1  
1457062\_at 1.64401 RIKEN cDNA 1700081L11 gene 1700081L11Rik  
1457063\_at 1.03240 RIKEN cDNA 9530033F24 gene 9530033F24Rik  
1457064\_at 1.71280 RIKEN cDNA D030002E05 gene D030002E05Rik  
1457065\_at 1.38295 uroplakin 1B Upk1b  
1457066\_at 0.94776 "ATP-binding cassette, sub-family C (CFTR/MRP), member 8" Abcc8  
1457067\_at 0.98816 Vacuolar protein sorting 4b (yeast) Vps4b  
1457068\_at 0.93269 N-acetylated alpha-linked acidic dipeptidase-like 1 Naalad11  
1457069\_at 0.99498 activating signal cointegrator 1 complex subunit 3 Ascc3  
1457070\_at 0.95607 "Ubiquitin-like, containing PHD and RING finger domains 2" Uhrf2  
1457071\_x\_at 1.03560 protein arginine N-methyltransferase 6 Prmt6  
1457072\_at 0.96900 RIKEN cDNA 2410127E16 gene /// B-cell CLL/lymphoma 11A (zinc finger  
protein) 2410127E16Rik /// Bcl11a  
1457073\_at 1.38343 O-linked N-acetylglucosamine (GlcNAc) transferase (UDP-N-

acetylglucosamine:polypeptide-N-acetylglucosaminyl transferase) Ogt  
1457074\_at 1.24174 kinesin family member 24 Kif24  
1457075\_at 0.99666 RIKEN cDNA A830031M15 gene A830031M15Rik  
1457076\_at 0.89677 "gene model 693, (NCBI) /// hypothetical protein LOC670665" Gm693 ///  
LOC670665  
1457077\_at 1.01754 "2 days neonate sympathetic ganglion cDNA, RIKEN full-length enriched  
library, clone:7120457A19 product:unclassifiable, full insert sequence" ---  
1457078\_at 1.08756 zinc finger protein 473 Zfp473  
1457079\_at 1.08697 CDNA clone IMAGE:30014192 ---  
1457080\_at 1.01014 Transcribed locus ---  
1457081\_at 1.73255 RIKEN cDNA D630038D15 gene D630038D15Rik  
1457082\_at 0.91191 forkhead box P3 Foxp3  
1457083\_at 0.94851 PRP31 pre-mRNA processing factor 31 homolog (yeast) Prpf31  
1457084\_at 1.14950 "NACHT, LRR and PYD containing protein 9b" Nalp9b  
1457085\_at 1.06088 hypothetical protein LOC665934 /// hypothetical protein LOC669392 ///  
hypothetical protein LOC676468 LOC665934 /// LOC669392 /// LOC676468  
1457086\_at 0.93263 hypothetical LOC434147 LOC434147  
1457087\_at 0.75545 RIKEN cDNA 2900083I11 gene 2900083I11Rik  
1457088\_at 1.09698 pallidin Pldn  
1457089\_at 1.41474 --- ---  
1457090\_at 1.06590 "0 day neonate head cDNA, RIKEN full-length enriched library,  
clone:4831433L12 product:unclassifiable, full insert sequence" ---  
1457091\_at 0.91796 RIKEN cDNA 4930526D03 gene 4930526D03Rik  
1457092\_at 0.86455 RIKEN cDNA C630007B19 gene C630007B19Rik  
1457093\_at 1.16097 GTPase activating protein and VPS9 domains 1 Gapvd1  
1457094\_at 1.12031 src homology 2 domain-containing transforming protein E She  
1457095\_at 0.86148 "Pleckstrin homology, Sec7 and coiled-coil domains 1" Pscd1  
1457096\_at 0.96554 RIKEN cDNA 6430520M22 gene 6430520M22Rik  
1457097\_at 0.81460 src family associated phosphoprotein 2 Scap2  
1457098\_at 0.91561 "DNA segment, Chr 2, ERATO Doi 624, expressed" D2Ertd624e  
1457099\_at 0.93078 RIKEN cDNA D030011O10 gene D030011O10Rik  
1457100\_at 1.10146 expressed sequence AW552889 AW552889  
1457101\_at 0.90285 "0 day neonate thymus cDNA, RIKEN full-length enriched library, clone:  
A430035F24 product:unclassifiable, full insert sequence" ---  
1457102\_at 0.94162 RIKEN cDNA A030001D16 gene A030001D16Rik  
1457103\_at 0.98721 expressed sequence AU046084 AU046084  
1457104\_at 1.02778 RIKEN cDNA D930036F22 gene D930036F22Rik  
1457105\_at 0.89906 polycystic kidney disease 2-like 1 Pkd2l1  
1457106\_at 0.97929 thyroid adenoma associated Thada  
1457107\_at 1.87285 N-myristoyltransferase 2 Nmt2  
1457108\_at 1.07713 "Interleukin 1 receptor, type II" Il1r2  
1457109\_x\_at 0.98745 Transcribed locus ---  
1457110\_at 1.03800 pantothenate kinase 1 Pank1



1457111\_at 2.01043 expressed sequence AA415038 AA415038  
1457112\_at 0.89932 hypothetical protein A230106N23 A230106N23  
1457113\_at 2.27984 "nuclear autoantigenic sperm protein (histone-binding) /// DNA segment, Chr 4, ERATO Doi 767, expressed" Nasp /// D4ErtD767e  
1457114\_at 0.80214 "torsin family 1, member B" Tor1b  
1457115\_at 1.16403 "Adult male hippocampus cDNA, RIKEN full-length enriched library, clone: C630007G15 product:hypothetical protein, full insert sequence" ---  
1457116\_at 1.18622 "REX1, RNA exonuclease 1 homolog (S. cerevisiae)" Rexo1  
1457117\_at 1.05038 "nuclear factor, erythroid derived 2, like 2" Nfe2l2  
1457118\_at 0.86602 "SHC (Src homology 2 domain containing) family, member 4" Shc4  
1457119\_at 0.90183 --- ---  
1457120\_at 1.05625 IL2-inducible T-cell kinase Itk  
1457121\_at 0.85062 expressed sequence AW822216 AW822216  
1457122\_at 1.07500 "Adaptor protein complex AP-2, mu1" Ap2m1  
1457123\_at 1.04617 neuregulin 4 Nrg4  
1457124\_at 1.06324 "Adult male corpora quadrigemina cDNA, RIKEN full-length enriched library, clone:B230352I09 product:unclassifiable, full insert sequence" ---  
1457125\_at 1.02640 "Adult male testis cDNA, RIKEN full-length enriched library, clone:4930515K13 product:unclassifiable, full insert sequence" ---  
1457126\_at 0.92077 "myosin, light polypeptide 4" Myl4  
1457127\_at 1.12362 defensin beta 42 Defb42  
1457128\_at 1.04059 --- ---  
1457129\_at 1.06539 Zinc finger protein 458 Zfp458  
1457130\_at 0.95786 RIKEN cDNA 2900035I09 gene 2900035I09Rik  
1457131\_at 0.92737 furry homolog (Drosophila) Fry  
1457132\_at 0.96833 Transcribed locus ---  
1457133\_at 0.95264 Transcribed locus ---  
1457134\_at 1.00476 cytoplasmic FMR1 interacting protein 1 Cyfip1  
1457135\_at 1.23983 fat tumor suppressor homolog 2 (Drosophila) Fath2  
1457136\_at 0.98429 "splicing factor, arginine/serine-rich 1 (ASF/SF2)" Sfrs1  
1457137\_at 0.96755 Transcribed locus ---  
1457138\_x\_at 1.04420 Opticin Optc  
1457139\_at 0.92230 autism susceptibility candidate 2 Aut2  
1457140\_s\_at 1.06896 RIKEN cDNA 4632411J06 gene 4632411J06Rik  
1457141\_at 1.01187 Aquaporin 11 Aqp11  
1457142\_at 0.93137 EF hand calcium binding protein 1 Efcfbp1  
1457143\_at 0.83995 "PREDICTED: Mus musculus hypothetical protein LOC625121 (LOC625121), mRNA" ---  
1457144\_at 0.96048 "sodium channel, voltage-gated, type II, beta" Scn2b  
1457145\_at 1.35950 "pleckstrin homology domain containing, family G (with RhoGef domain) member 4" Plekhg4  
1457146\_at 0.91885 dedicator of cytokinesis 4 Dock4  
1457147\_at 1.39331 cDNA sequence BC026657 BC026657

1457148\_at 0.87811 CUB and Sushi multiple domains 2 Csm2  
1457149\_at 0.94821 tetratricopeptide repeat domain 22 Ttc22  
1457150\_at 1.20360 expressed sequence AI428301 AI428301  
1457151\_at 0.97262 "Mus musculus, clone IMAGE:1527712, mRNA" ---  
1457152\_at 1.00087 --- ---  
1457153\_at 0.95699 hypothetical LOC552882 LOC552882  
1457154\_at 1.26927 Membrane-associated ring finger (C3HC4) 6 6-Mar  
1457155\_at 1.01666 "aldehyde dehydrogenase 2, mitochondrial" Aldh2  
1457156\_at 0.96684 TRH-degrading enzyme Trhde  
1457157\_at 1.00720 "phospholipase C, eta 1" Plch1  
1457158\_at 1.11641 RIKEN cDNA 0610039J04 gene 0610039J04Rik  
1457159\_at 0.89679 "gene model 101, (NCBI)" Gm101  
1457160\_at 0.82949 four jointed box 1 (Drosophila) Fjx1  
1457161\_at 2.17954 RIKEN cDNA 9530029O12 gene 9530029O12Rik  
1457162\_at 1.09752 low density lipoprotein receptor adaptor protein 1 Ldlrap1  
1457163\_at 1.03762 RIKEN cDNA D730035F11 gene D730035F11Rik  
1457164\_at 1.04246 "transient receptor potential cation channel, subfamily A, member 1" Trpa1  
1457165\_at 1.02210 --- ---  
1457166\_at 1.11158 Expressed sequence AA536749 AA536749  
1457167\_at 0.98976 "cofactor required for Sp1 transcriptional activation, subunit 2" Crsp2  
1457168\_at 1.24709 expressed sequence AI225934 AI225934  
1457169\_at 1.13560 "Protein phosphatase 1, regulatory (inhibitor) subunit 12B" Ppp1r12b  
1457170\_at 0.87909 leucine rich repeat containing 36 Lrrc36  
1457171\_at 1.05047 --- ---  
1457172\_at 1.07668 Rho guanine nucleotide exchange factor (GEF) 15 Arhgef15  
1457173\_at 1.64315 "Tyrosine 3-monooxygenase/tryptophan 5-monooxygenase activation protein, epsilon polypeptide" Ywhae  
1457174\_at 1.28822 expressed sequence AU015680 AU015680  
1457175\_at 1.36234 Numb gene homolog (Drosophila) Numb  
1457176\_at 1.04534 GTPase activating RANGAP domain-like 1 Garnl1  
1457177\_at 1.08809 RAR-related orphan receptor alpha Rora  
1457178\_at 1.16153 RAB GTPase activating protein 1-like Rabgap11  
1457179\_at 0.98204 "RIKEN cDNA 4930406H16 gene /// NACHT, leucine rich repeat and PYD containing 4E" 4930406H16Rik /// Nalp4e  
1457180\_at 0.96240 DIP2 disco-interacting protein 2 homolog C (Drosophila) Dip2c  
1457181\_at 1.76171 "DNA segment, Chr 15, Wayne State University 75, expressed" D15Wsu75e  
1457182\_at 0.90009 mitogen activated protein kinase kinase 7 Map2k7  
1457183\_at 1.13349 "solute carrier family 6 (neurotransmitter transporter, GABA), member 1" Slc6a1  
1457184\_at 1.17556 FERM domain containing 6 Frmd6  
1457185\_at 0.96040 --- ---  
1457186\_at 1.11765 transducin (beta)-like 1X-linked receptor 1 Tbl1xr1  
1457187\_at 0.96981 RIKEN cDNA A630071L07 gene A630071L07Rik

1457188\_at 1.18531 Rho guanine nucleotide exchange factor (GEF) 11 Arhgef11  
1457189\_at 1.43205 "Inositol 1,4,5-triphosphate receptor 1" Itpr1  
1457190\_at 0.98680 "12 days embryo eyeball cDNA, RIKEN full-length enriched library, clone:  
D230005M19 product:unclassifiable, full insert sequence" ---  
1457191\_at 1.86037 --- ---  
1457192\_at 0.88001 --- ---  
1457193\_at 1.00737 myeloid/lymphoid or mixed-lineage leukemia 3 Mll3  
1457194\_at 1.18416 --- ---  
1457195\_at 1.12812 "pleckstrin homology domain containing, family M (with RUN domain)  
member 1" Plekhm1  
1457196\_at 0.90973 Transcribed locus ---  
1457197\_at 1.01619 "protein kinase, cAMP dependent, catalytic, beta" Prkacb  
1457198\_at 0.85372 neuropilin 1 Nrp1  
1457199\_at 1.14954 --- ---  
1457200\_at 1.01413 "serine (or cysteine) peptidase inhibitor, clade B, member 9d" Serpinb9d  
1457201\_at 0.99073 Arsenic (+3 oxidation state) methyltransferase As3mt  
1457202\_at 1.09778 --- ---  
1457203\_at 1.08229 Transcribed locus ---  
1457204\_at 0.97288 "Zinc finger, DHHC domain containing 2" Zdhhc2  
1457205\_at 1.04584 N-ethylmaleimide sensitive fusion protein Nsf  
1457206\_at 0.96754 Zinc finger protein 521 Zfp521  
1457207\_at 0.97351 Signaling molecule ATTP Attp  
1457208\_at 0.96181 "nuclear transcription factor, X-box binding-like 1" Nfxl1  
1457209\_at 1.02298 DDHD domain containing 2 Ddhd2  
1457210\_at 0.97707 RIKEN cDNA 1700092E19 gene 1700092E19Rik  
1457211\_at 0.99450 Glutaminase Gls  
1457212\_at 0.91896 Transcribed locus ---  
1457213\_a\_at 1.00446 "diacylglycerol kinase, eta" Dgkh  
1457214\_at 1.28227 Nuclear receptor coactivator 3 Ncoa3  
1457215\_at 0.92044 "Adult male hippocampus cDNA, RIKEN full-length enriched library, clone:  
C630028A20 product:unclassifiable, full insert sequence" ---  
1457216\_at 1.30650 RING CCCH (C3H) domains 1 Rc3h1  
1457217\_at 0.94696 Paralemmin Palm  
1457218\_at 1.17296 RIKEN cDNA 6430510M02 gene 6430510M02Rik  
1457219\_at 1.00030 rho/rac guanine nucleotide exchange factor (GEF) 18 Arhgef18  
1457220\_at 0.90917 --- ---  
1457221\_at 0.96681 "Immunoglobulin superfamily, member 11" Igsf11  
1457222\_at 1.08498 cAMP responsive element binding protein 5 Creb5  
1457223\_at 1.04583 ELMO domain containing 1 Elmod1  
1457224\_at 0.96861 RIKEN cDNA 4631422O05 gene 4631422O05Rik  
1457225\_at 0.78021 olfactory receptor 288 Olfr288  
1457226\_at 0.93810 --- ---  
1457227\_at 0.93415 expressed sequence AI843755 AI843755

1457228\_x\_at 0.96068 GLE1 RNA export mediator-like (yeast Gle11  
1457229\_at 1.03575 G-protein coupled receptor 173 Gpr173  
1457230\_at 1.07669 glucosamine-6-phosphate deaminase 2 Gnpda2  
1457231\_at 1.87432 "Hypoxia inducible factor 1, alpha subunit" Hif1a  
1457232\_at 0.84139 F-box and leucine-rich repeat protein 21 Fbxl21  
1457233\_at 1.21644 "DnaJ (Hsp40) homolog, subfamily A, member 2" Dnaja2  
1457234\_at 1.01519 Transcribed locus ---  
1457235\_at 0.94735 low density lipoprotein-related protein 1B (deleted in tumors) Lrp1b  
1457236\_at 1.09353 G protein-coupled receptor 62 Gpr62  
1457237\_at 0.94094 muscleblind-like 2 Mbnl2  
1457238\_at 1.02315 Transcribed locus ---  
1457239\_at 0.93834 Spleen tyrosine kinase Syk  
1457240\_at 1.12128 cyclin-dependent kinase 9 (CDC2-related kinase) Cdk9  
1457241\_at 0.86890 Leucine rich repeat containing 48 Lrrc48  
1457242\_at 0.91804 U box domain containing 5 Ubox5  
1457243\_at 1.04734 RIKEN cDNA 1110032O16 gene 1110032O16Rik  
1457244\_at 0.96007 "DNA segment, Chr 6, ERATO Doi 474, expressed" D6Ertd474e  
1457245\_at 0.99205 disrupted in renal carcinoma 2 (human) Dirc2  
1457246\_at 1.00391 retinoic acid induced 16 Rai16  
1457247\_at 1.10950 expressed sequence AI465495 AI465495  
1457248\_x\_at 1.43264 hydroxysteroid (17-beta) dehydrogenase 7 Hsd17b7  
1457249\_at 1.28462 Ubiquitin associated protein 2-like Ubap2l  
1457250\_x\_at 1.12973 "Nuclear receptor subfamily 1, group D, member 2" Nr1d2  
1457251\_x\_at 1.07737 Adenylate cyclase 1 Adcy1  
1457252\_x\_at 0.92459 phospholipase D2 Pld2  
1457253\_at 1.11705 tripartite motif-containing 40 Trim40  
1457254\_x\_at 1.08014 RIKEN cDNA 6330442E10 gene 6330442E10Rik  
1457255\_x\_at 1.00963 Kinesin family member 5C Kif5c  
1457256\_x\_at 0.89904 patched homolog 2 /// similar to Protein patched homolog 2 (PTC2)  
Ptch2 /// LOC674483  
1457257\_x\_at 0.84507 "0 day neonate lung cDNA, RIKEN full-length enriched library, clone:  
E030046E07 product:unclassifiable, full insert sequence" ---  
1457258\_at 0.92273 "PREDICTED: Mus musculus hypothetical LOC381645 (LOC381645),  
mRNA" ---  
1457259\_at 1.03628 --- ---  
1457260\_at 0.93026 RIKEN cDNA 7530403E16 gene 7530403E16Rik  
1457261\_at 0.84318 RIKEN cDNA A930025H08 gene A930025H08Rik  
1457262\_at 1.09461 RIKEN cDNA 2610207I05 gene 2610207I05Rik  
1457263\_at 0.92046 "Serine (or cysteine) peptidase inhibitor, clade A, member 3K" Serpina3k  
1457264\_at 1.67996 PHD finger protein 20-like 1 Phf20l1  
1457265\_at 0.88512 RIKEN cDNA B230333C21 gene B230333C21Rik  
1457266\_at 1.18540 expressed sequence AW322671 AW322671  
1457267\_at 1.02027 --- ---

1457268\_at 0.93721 "DOT1-like, histone H3 methyltransferase (*S. cerevisiae*)" Dot11  
 1457269\_at 1.02314 "gene model 1123, (NCBI) /// similar to coxsackie-adenovirus receptor-like"  
 Gm1123 /// LOC674752  
 1457270\_at 1.07850 RIKEN cDNA B230343A10 gene B230343A10Rik  
 1457271\_at 0.87253 "gene model 131, (NCBI) /// similar to prochymosin" Gm131 /// LOC634449  
 1457272\_at 1.04374 Transcribed locus ---  
 1457273\_at 0.94553 similar to odd Oz/ten-m homolog 2 LOC669490  
 1457274\_at 1.01000 hypothetical protein E330017N17 E330017N17  
 1457275\_at 0.81025 desmuslin Dmn  
 1457276\_at 1.05825 SNF1-like kinase 2 Snf1lk2  
 1457277\_at 0.87441 cDNA sequence BC038925 BC038925  
 1457278\_at 0.95528 RIKEN cDNA 6720489N17 gene 6720489N17Rik  
 1457279\_at 1.01269 "Adult male corpora quadrigemina cDNA, RIKEN full-length enriched library,  
 clone:B230347A18 product:unclassifiable, full insert sequence" ---  
 1457280\_at 1.03080 --- ---  
 1457281\_at 1.04606 RIKEN cDNA 4930461P20 gene 4930461P20Rik  
 1457282\_x\_at 1.25194 "Tubulin, gamma complex associated protein 5" Tubgcp5  
 1457283\_at 1.03026 --- ---  
 1457284\_at 1.20832 CDNA clone IMAGE:5256843 ---  
 1457285\_at 0.89812 zinc finger protein 187 Zfp187  
 1457286\_at 0.96777 Histidine triad nucleotide binding protein 1 Hint1  
 1457287\_at 0.89807 Transcribed locus ---  
 1457288\_at 1.03596 "ankyrin 3, epithelial" Ank3  
 1457289\_at 0.92141 "nuclear receptor subfamily 2, group E, member 1" Nr2e1  
 1457290\_at 1.07854 mab-21-like 1 (*C. elegans*) Mab21l1  
 1457291\_at 1.07931 "Adult male hypothalamus cDNA, RIKEN full-length enriched library, clone:  
 A230080O15 product:unclassifiable, full insert sequence" ---  
 1457292\_at 1.77525 Josephin domain containing 3 Josd3  
 1457293\_at 0.78799 Zinc finger and BTB domain containing 4 Zbtb4  
 1457294\_at 1.27535 Transmembrane and tetratricopeptide repeat containing 3 Tmtc3  
 1457295\_at 1.06574 trinucleotide repeat containing 6a Tnrc6a  
 1457296\_at 1.05123 "cartilage intermediate layer protein, nucleotide pyrophosphohydrolase" Cilp  
 1457297\_at 1.59660 "LysM, putative peptidoglycan-binding, domain containing 4" Lysmd4  
 1457298\_at 1.01723 --- ---  
 1457299\_at 0.90984 "glutamate receptor, metabotropic 4" Grm4  
 1457300\_at 0.92629 aftiphilin Aftph  
 1457301\_at 1.01623 expressed sequence AI931714 AI931714  
 1457302\_at 1.38304 "Solute carrier family 20, member 2" Slc20a2  
 1457303\_at 0.93644 Ankyrin repeat and sterile alpha motif domain containing 3 Anks3  
 1457304\_at 1.02810 "DNA segment, Chr 13, ERATO Doi 787, expressed" D13Ertd787e  
 1457305\_at 0.82386 Transcribed locus ---  
 1457306\_at 0.93777 Transcribed locus ---  
 1457307\_at 1.09384 RIKEN cDNA A330102K04 gene A330102K04Rik

1457308\_at 1.05778 Ubiquitin specific petidase 45 Usp45  
1457309\_at 0.97510 expressed sequence AU015228 AU015228  
1457310\_x\_at 0.86421 "scratch homolog 2, zinc finger protein (Drosophila)" Scrt2  
1457311\_at 1.00311 calcium/calmodulin-dependent protein kinase II alpha Camk2a  
1457312\_at 1.11712 NHL repeat containing 2 Nhlrc2  
1457313\_at 1.06818 oculocerebrorenal syndrome of Lowe Oclrl  
1457314\_at 1.02591 LINE-1 type transposase domain containing 1 L1td1  
1457315\_at 0.99766 RIKEN cDNA A230051G13 gene A230051G13Rik  
1457316\_at 1.26683 microtubule-associated protein 6 Mtap6  
1457317\_at 1.67048 --- ---  
1457318\_at 1.00729 RIKEN cDNA A330008L17 gene A330008L17Rik  
1457319\_at 1.07210 RIKEN cDNA A130038J17 gene A130038J17Rik  
1457320\_at 0.82991 Wings apart-like homolog (Drosophila) Wapal  
1457321\_at 0.83911 hypothetical protein LOC667963 LOC667963  
1457322\_at 1.05374 "Complement component 1, q subcomponent, beta polypeptide" C1qb  
1457323\_at 0.90570 hypothetical protein LOC632191 LOC632191  
1457324\_at 1.06635 "Opioid receptor, sigma 1" Oprs1  
1457325\_at 1.14172 "K+ voltage-gated channel, subfamily S, 2" Kcns2  
1457326\_at 0.90570 similar to zinc finger protein 616 /// similar to zinc finger protein 420  
LOC545191 /// LOC631233  
1457327\_at 1.04104 SNF2 histone linker PHD RING helicase Shprh  
1457328\_at 0.81234 "adrenergic receptor, alpha 2c" Adra2c  
1457329\_at 0.92388 adenylate cyclase 1 Adcy1  
1457330\_at 0.93185 "GPC PDZ domain containing family, member 2" Gipc2  
1457331\_at 0.97341 Retbindin Rtbdn  
1457332\_at 0.93864 protein arginine N-methyltransferase 3 Prmt3  
1457333\_at 1.01300 sidekick homolog 2 (chicken) Sdk2  
1457334\_at 1.48656 RIKEN cDNA C130057M05 gene C130057M05Rik  
1457335\_at 0.95125 "Mammary gland RCB-0527 Jyg-MC(B) cDNA, RIKEN full-length enriched library, clone:G930025P03 product:unclassifiable, full insert sequence" ---  
1457336\_at 1.04309 R3H domain 1 (binds single-stranded nucleic acids) R3hdm1  
1457337\_at 1.02512 --- ---  
1457338\_at 1.04281 "Protein phosphatase 1, regulatory (inhibitor) subunit 12B" Ppp1r12b  
1457339\_at 1.15489 Cerebral cavernous malformation 2 homolog (human) Ccm2  
1457340\_at 1.00297 RUN and FYVE domain containing 1 Rufy1  
1457341\_at 0.93680 "Transcribed locus, moderately similar to XP\_579758.1 PREDICTED: hypothetical protein XP\_579758 [Rattus norvegicus]" ---  
1457342\_at 1.00043 "zinc finger protein, subfamily 1A, 4 (Eos)" Zfpn1a4  
1457343\_at 1.14552 "Striatin, calmodulin binding protein 3" Strn3  
1457344\_at 1.02491 neuropilin (NRP) and tolloid (TLL)-like 2 Neto2  
1457345\_at 1.25248 Polymerase (RNA) III (DNA directed) polypeptide B Polr3b  
1457346\_at 1.00211 Transcribed locus ---  
1457347\_at 1.07129 "ryanodine receptor 1, skeletal muscle" Ryr1

1457348\_at 0.98265 ADP-ribosylation factor 4 Arf4  
1457349\_at 0.69205 similar to Tetratricopeptide repeat protein 6 (TPR repeat protein 6)  
LOC639426  
1457350\_at 0.87932 period homolog 2 (Drosophila) Per2  
1457351\_at 0.87556 "TAF2 RNA polymerase II, TATA box binding protein (TBP)-associated factor" Taf2  
1457352\_x\_at 0.97300 RIKEN cDNA 9430071P14 gene 9430071P14Rik  
1457353\_at 0.93937 Translocase of outer mitochondrial membrane 70 homolog A (yeast) Tomm70a  
1457354\_at 1.03491 keratin 222 Krt222  
1457355\_at 0.96026 --- ---  
1457356\_at 1.87580 Insulin-like growth factor 2 receptor Igf2r  
1457357\_at 1.68887 tousled-like kinase 2 (Arabidopsis) Tlk2  
1457358\_at 1.70311 --- ---  
1457359\_at 0.86452 "inositol polyphosphate-4-phosphatase, type II" Inpp4b  
1457360\_at 0.95761 Craniofacial development protein 1 Cfdp1  
1457361\_at 0.98065 RIKEN cDNA C630007C17 gene C630007C17Rik  
1457362\_at 1.02603 Agouti related protein Agrp  
1457363\_at 0.93729 hypothetical protein LOC654469 LOC654469  
1457364\_at 1.01513 --- ---  
1457365\_at 1.00846 --- ---  
1457366\_at 1.11856 cell division cycle 40 homolog (yeast) Cdc40  
1457367\_at 1.14626 "Amylase 2, pancreatic" Amy2  
1457368\_at 0.93899 RIKEN cDNA 2310033K02 gene 2310033K02Rik  
1457369\_at 1.31340 Phosphatase and actin regulator 4 Phactr4  
1457370\_at 1.21325 RAB GTPase activating protein 1 Rabgap1  
1457371\_at 1.02030 RIKEN cDNA 5230400G24 gene 5230400G24Rik  
1457372\_at 0.97915 --- ---  
1457373\_at 0.94259 Transcribed locus ---  
1457374\_at 1.96538 "neural precursor cell expressed, developmentally down-regulated gene 4-like" Nedd4l  
1457375\_at 0.93645 "PREDICTED: Mus musculus hypothetical protein LOC627707 (LOC627707), mRNA" ---  
1457376\_at 1.09978 Integrin alpha 4 Itga4  
1457377\_at 1.04113 L(3)mbt-like 3 (Drosophila) L3mbtl3  
1457378\_at 0.98307 Mitochondrial ribosomal protein L54 Mrpl54  
1457379\_at 1.11308 expressed sequence C78549 C78549  
1457380\_at 1.19669 expressed sequence C85504 C85504  
1457381\_at 0.99063 Angiopoietin 1 Angpt1  
1457382\_at 1.01534 "PREDICTED: Mus musculus similar to Heterogeneous nuclear ribonucleoprotein A1 (Helix-destabilizing protein) (Single-strand binding protein) (hnRNP core protein A1) (HDP) (LOC628392), mRNA" ---  
1457383\_at 1.31723 RIKEN cDNA 1500011J06 gene 1500011J06Rik

1457384\_at 0.95982 "0 day neonate head cDNA, RIKEN full-length enriched library, clone:4833438M18 product:unclassifiable, full insert sequence" ---

1457385\_at 1.00393 --- ---

1457386\_at 0.93557 RIKEN cDNA 9530010C24 gene 9530010C24Rik

1457387\_at 0.96842 Replication initiator 1 Repin1

1457388\_at 0.86543 RIKEN cDNA A830080L01 gene A830080L01Rik

1457389\_at 0.90287 RIKEN cDNA 9830166K06 gene 9830166K06Rik

1457390\_at 1.46608 PRP3 pre-mRNA processing factor 3 homolog (yeast) Prpf3

1457391\_at 0.83149 Vesicle-associated membrane protein 3 Vamp3

1457392\_at 1.34269 "Adult retina cDNA, RIKEN full-length enriched library, clone:A930031I16 product:unclassifiable, full insert sequence" ---

1457393\_at 0.98722 RIKEN cDNA 2700008B19 gene 2700008B19Rik

1457394\_at 0.95705 RIKEN cDNA 2900002K06 gene 2900002K06Rik

1457395\_at 0.94556 RIKEN cDNA 5330421F07 gene 5330421F07Rik

1457396\_at 0.95756 --- ---

1457397\_at 1.00937 Kruppel-like factor 14 Klf14

1457398\_at 1.96767 Guanosine diphosphate (GDP) dissociation inhibitor 2 Gdi2

1457399\_at 1.00749 "ELAV (embryonic lethal, abnormal vision, Drosophila)-like 4 (Hu antigen D)" Elavl4

1457400\_at 0.77798 sorting nexin 19 Snx19

1457401\_at 0.93712 "dynein, axonemal, heavy chain 9" Dnahc9

1457402\_at 1.00773 Sulfatase 1 Sulf1

1457403\_at 1.00707 RIKEN cDNA 9130409I23 gene 9130409I23Rik

1457404\_at 1.14539 "Nuclear factor of kappa light polypeptide gene enhancer in B-cells inhibitor, zeta" Nfkbiz

1457405\_at 0.99533 Dynamin 3 Dnm3

1457406\_at 0.95865 "Adult male brain UNDEFINED\_CELL\_LINE cDNA, RIKEN full-length enriched library, clone:M5C1091A08 product:unclassifiable, full insert sequence" ---

1457407\_at 1.17219 roundabout homolog 1 (Drosophila) Robo1

1457408\_at 1.02049 "Phosphodiesterase 4A, cAMP specific" Pde4a

1457409\_at 0.99265 fucosyltransferase 9 Fut9

1457410\_at 1.86199 Rho GTPase activating protein 5 Arhgap5

1457411\_at 0.98911 --- ---

1457412\_at 1.09182 "sodium channel, voltage-gated, type VIII, alpha" Scn8a

1457413\_at 0.92266 Receptor tyrosine kinase-like orphan receptor 1 Ror1

1457414\_at 1.02379 "9.5 days embryo parthenogenote cDNA, RIKEN full-length enriched library, clone:B130039H18 product:unclassifiable, full insert sequence" ---

1457415\_a\_at 1.07255 RIKEN cDNA 4930513N10 gene 4930513N10Rik

1457416\_at 0.98649 Methionine aminopeptidase 2 Metap2

1457417\_at 1.03680 --- ---

1457418\_at 0.92293 "Spermatogenesis associated glutamate (E)-rich protein 1, pseudogene 1" Speer1-ps1

1457419\_s\_at 0.95052 "Spermatogenesis associated glutamate (E)-rich protein 1, pseudogene 1"



## Speer1-ps1

1457420\_at 1.02679 lemur tyrosine kinase 3 Lmtk3  
1457421\_at 1.01830 RIKEN cDNA 1700063D05 gene 1700063D05Rik  
1457422\_at 1.08692 RIKEN cDNA 9030205A07 Gene 9030205A07Rik  
1457423\_at 0.92978 similar to voltage gated channel like 1 LOC675405  
1457424\_at 1.00024 eyes absent 1 homolog (Drosophila) Eya1  
1457425\_at 0.95293 RIKEN cDNA C130038G02 gene C130038G02Rik  
1457426\_at 1.04121 RIKEN cDNA 1700048O20 gene 1700048O20Rik  
1457427\_at 1.02996 Adherens junction associated protein 1 Ajap1  
1457428\_at 1.01631 hypothetical protein C230040D14 C230040D14  
1457429\_s\_at 0.94957 "gene model 106, (NCBI)" Gm106  
1457430\_at 0.96764 "Sparc/osteonectin, cwcv and kazal-like domains proteoglycan 2" Spock2  
1457431\_at 0.99082 Transcribed locus ---  
1457432\_at 0.93649 prospero-related homeobox 1 Prox1  
1457433\_x\_at 1.08877 Zinc finger protein 120 Zfp120  
1457434\_s\_at 0.92559 "protein tyrosine phosphatase-like (proline instead of catalytic arginine), member a" Ptpla  
1457435\_x\_at 2.41394 myomesin 2 Myom2  
1457436\_at 0.96471 "TBC1 domain family, member 7" Tbc1d7  
1457437\_at 0.87260 RIKEN cDNA C630035N08 gene C630035N08Rik  
1457438\_at 1.04962 --- ---  
1457439\_at 0.98929 Cyclin T2 Ccnt2  
1457440\_at 1.02346 somatostatin receptor 4 Sstr4  
1457441\_at 0.84817 early B-cell factor 1 Ebf1  
1457442\_at 0.97640 expressed sequence AW125324 AW125324  
1457443\_at 0.97197 --- ---  
1457444\_at 1.00178 "Adult male aorta and vein cDNA, RIKEN full-length enriched library, clone: A530012F11 product:unclassifiable, full insert sequence" ---  
1457445\_at 1.45227 trichorhinophalangeal syndrome I (human) Trps1  
1457446\_at 0.98249 opioid binding protein/cell adhesion molecule-like Opcml  
1457447\_at 1.27355 Retinoblastoma 1 Rb1  
1457448\_at 0.95268 patatin-like phospholipase domain containing 1 Pnpla1  
1457449\_at 1.43213 Longevity assurance homolog 6 (S. cerevisiae) Lass6  
1457450\_at 1.10466 RIKEN cDNA A830091I15 gene A830091I15Rik  
1457451\_at 1.06178 --- ---  
1457452\_at 1.00186 expressed sequence AA407782 AA407782  
1457453\_at 1.05953 RIKEN cDNA 1700057G04 gene 1700057G04Rik  
1457454\_at 2.28274 ubiquitin specific peptidase 47 Usp47  
1457455\_at 1.56944 suppressor of hairy wing homolog 4 (Drosophila) Suhw4  
1457456\_at 1.01470 mitogen activated protein kinase kinase kinase 10 Map3k10  
1457457\_at 0.91047 RIKEN cDNA 5033405K12 gene 5033405K12Rik  
1457458\_at 1.89450 cDNA sequence BC057627 BC057627  
1457459\_at 1.64594 expressed sequence AU014973 AU014973

1457460\_at 1.08139 acyl-CoA synthetase short-chain family member 2 Acss2  
1457461\_at 0.94554 RIKEN cDNA A630039O03 gene A630039O03Rik  
1457462\_at 0.94071 --- ---  
1457463\_at 1.04347 Down syndrome cell adhesion molecule-like 1 Dscam1  
1457464\_at 1.67540 hypothetical LOC403342 C130015C19  
1457465\_at 1.02591 shroom family member 4 Shroom4  
1457466\_at 1.04081 expressed sequence AA409368 AA409368  
1457467\_at 0.97536 Pbx/knotted 1 homeobox Pknox1  
1457468\_at 2.48293 "Tankyrase, TRF1-interacting ankyrin-related ADP-ribose polymerase 2"  
Tnks2  
1457469\_at 0.80879 --- ---  
1457470\_at 1.27658 "DNA segment, Chr 3, ERATO Doi 452, expressed" D3Ertd452e  
1457471\_at 0.81326 interleukin 17 receptor C Il17rc  
1457472\_at 0.87384 trinucleotide repeat containing 15 Tnrc15  
1457473\_at 0.94436 chromodomain helicase DNA binding protein 1 Chd1  
1457474\_at 1.07748 Cartilage acidic protein 1 Crtac1  
1457475\_at 1.16219 expressed sequence C80993 C80993  
1457476\_at 1.04503 "DNA segment, Chr 8, ERATO Doi 362, expressed" D8Ertd362e  
1457477\_at 1.00121 Muscleblind-like 2 Mbnl2  
1457478\_at 0.93083 Spermatid perinuclear RNA binding protein Strbp  
1457479\_at 1.67426 --- ---  
1457480\_at 1.53447 Polycomb group ring finger 3 Pcgf3  
1457481\_at 0.94272 Transcribed locus ---  
1457482\_at 0.95843 "jumonji, AT rich interactive domain 1B (Rbp2 like)" Jarid1b  
1457483\_at 1.66434 AT rich interactive domain 5B (Mrf1 like) Arid5b  
1457484\_at 1.17411 hypothetical D930050J11 D930050J11  
1457485\_at 1.07182 F-box and WD-40 domain protein 11 Fbxw11  
1457486\_at 1.05953 "DNA segment, Chr 9, University of California at Los Angeles 1" D9Ucla1  
1457487\_at 0.89117 "Adult male liver tumor cDNA, RIKEN full-length enriched library, clone:  
C730014I02 product:unclassifiable, full insert sequence" ---  
1457488\_at 1.01579 RIKEN cDNA B230339M05 gene B230339M05Rik  
1457489\_at 1.82215 Eukaryotic translation initiation factor 4E Eif4e  
1457490\_at 0.98104 RIKEN cDNA B230218L05 gene B230218L05Rik  
1457491\_at 1.08006 --- ---  
1457492\_at 2.19780 Triple functional domain (PTPRF interacting) Trio  
1457493\_at 1.13980 phosphatase and tensin homolog Pten  
1457494\_at 1.06743 "Adult male corpus striatum cDNA, RIKEN full-length enriched library, clone:  
C030004I10 product:unclassifiable, full insert sequence" ---  
1457495\_at 1.01469 RIKEN cDNA 2900052N01 gene 2900052N01Rik  
1457496\_at 1.01173 "Adult male olfactory brain cDNA, RIKEN full-length enriched library,  
clone:6430514C12 product:unclassifiable, full insert sequence" ---  
1457497\_at 0.96386 Synaptotagmin I Syt1  
1457498\_at 1.07238 "mannosidase 2, alpha 2" Man2a2

|              |                                                                                                                                           |               |
|--------------|-------------------------------------------------------------------------------------------------------------------------------------------|---------------|
| 1457499_at   | 0.86815 WW domain containing E3 ubiquitin protein ligase 2                                                                                | Wwp2          |
| 1457500_at   | 1.42009 DEP domain containing 5 Depdc5                                                                                                    |               |
| 1457501_at   | 1.00944 hypothetical protein LOC622665                                                                                                    | LOC622665     |
| 1457502_at   | 0.97138 Quaking Qk                                                                                                                        |               |
| 1457503_at   | 1.05607 RIKEN cDNA 2310035C23 gene                                                                                                        | 2310035C23Rik |
| 1457504_at   | 1.02467 --- ---                                                                                                                           |               |
| 1457505_at   | 1.22994 Utrophin                                                                                                                          | Utrn          |
| 1457506_at   | 0.92703 "Amyotrophic lateral sclerosis 2 (juvenile) chromosome region, candidate 19 (human)"                                              | Als2cr19      |
| 1457507_at   | 1.03171 Neuregulin 3                                                                                                                      | Nrg3          |
| 1457508_at   | 2.32744 RIKEN cDNA C430003N24 gene                                                                                                        | C430003N24Rik |
| 1457509_at   | 1.34842 "sno, strawberry notch homolog 1 (Drosophila)"                                                                                    | Sbno1         |
| 1457510_at   | 1.43781 PHD finger protein 14                                                                                                             | Phf14         |
| 1457511_at   | 1.09225 regulator of G-protein signaling 12                                                                                               | Rgs12         |
| 1457512_at   | 0.97908 "16 days neonate thymus cDNA, RIKEN full-length enriched library, clone: A130094L10 product:unclassifiable, full insert sequence" | ---           |
| 1457513_at   | 1.17293 RIKEN cDNA 6330569M22 gene                                                                                                        | 6330569M22Rik |
| 1457514_at   | 1.09050 YLP motif containing 1                                                                                                            | Ylpm1         |
| 1457515_at   | 1.15290 Homeodomain interacting protein kinase 1                                                                                          | Hipk1         |
| 1457516_at   | 0.94497 RIKEN cDNA 1110033M05 gene                                                                                                        | 1110033M05Rik |
| 1457517_at   | 1.08103 RIKEN cDNA A730046G19 gene                                                                                                        | A730046G19Rik |
| 1457518_at   | 1.00347 RIKEN cDNA C630004H02 gene                                                                                                        | C630004H02Rik |
| 1457519_at   | 1.11342 Transcribed locus                                                                                                                 | ---           |
| 1457520_at   | 0.93989 Grainyhead-like 2 (Drosophila)                                                                                                    | Grhl2         |
| 1457521_at   | 0.89927 --- ---                                                                                                                           |               |
| 1457522_at   | 1.99939 RIKEN cDNA 1110034C04 gene                                                                                                        | 1110034C04Rik |
| 1457523_at   | 1.03403 RIKEN cDNA 9530056K15 gene                                                                                                        | 9530056K15Rik |
| 1457524_at   | 1.19521 Transcription factor 12                                                                                                           | Tcf12         |
| 1457525_at   | 0.95360 "Activated spleen cDNA, RIKEN full-length enriched library, clone: F830103I17 product:unclassifiable, full insert sequence"       | ---           |
| 1457526_at   | 0.95183 growth factor receptor bound protein 14                                                                                           | Grb14         |
| 1457527_at   | 0.91703 --- ---                                                                                                                           |               |
| 1457528_at   | 1.77750 "solute carrier family 4, sodium bicarbonate cotransporter, member 7"                                                             | Slc4a7        |
| 1457529_x_at | 1.02051 RIKEN cDNA 2810021G02 gene                                                                                                        | 2810021G02Rik |
| 1457530_at   | 1.02471 Transcribed locus                                                                                                                 | ---           |
| 1457531_a_at | 0.98708 RIKEN cDNA A930017K11 gene                                                                                                        | A930017K11Rik |
| 1457532_at   | 1.00806 GTPase activating RANGAP domain-like 1                                                                                            | Garnl1        |
| 1457533_at   | 0.99462 --- ---                                                                                                                           |               |
| 1457534_at   | 1.49978 Ubiquitin associated protein 2-like                                                                                               | Ubap2l        |
| 1457535_at   | 1.15162 RIKEN cDNA 4932438A13 gene                                                                                                        | 4932438A13Rik |
| 1457536_at   | 1.08025 glypican 5                                                                                                                        | Gpc5          |
| 1457537_at   | 1.09338 "RAB1, member RAS oncogene family"                                                                                                | Rab1          |
| 1457538_at   | 0.89291 RIKEN cDNA 5930422O12 gene                                                                                                        | 5930422O12Rik |

1457539\_at 1.06867 "DNA segment, Chr 10, ERATO Doi 709, expressed" D10Ertd709e  
 1457540\_at 1.22602 "Solute carrier family 25 (mitochondrial carrier, phosphate carrier), member 26" Slc25a26  
 1457541\_at 1.14006 A kinase (PRKA) anchor protein 14 Akap14  
 1457542\_at 1.08046 nucleoporin 133 Nup133  
 1457543\_at 0.93979 "NOL1/NOP2/Sun domain family, member 7" Nsun7  
 1457544\_at 0.93066 ubiquitin-conjugating enzyme E2W (putative) Ube2w  
 1457545\_at 1.01819 RIKEN cDNA 9530036O11 gene 9530036O11Rik  
 1457546\_at 1.02657 "CCR4-NOT transcription complex, subunit 1" Cnot1  
 1457547\_at 1.01958 "Adult male spinal cord cDNA, RIKEN full-length enriched library, clone: A330081M13 product:unclassifiable, full insert sequence" ---  
 1457548\_at 1.25735 "A disintegrin-like and metallopeptidase (reprolysin type) with thrombospondin type 1 motif, 6" Adamts6  
 1457549\_at 1.07513 Cyclin D3 Ccnd3  
 1457550\_at 0.92240 RIKEN cDNA 9530059O14 gene 9530059O14Rik  
 1457551\_at 1.32438 "Activin A receptor, type 1" Acvr1  
 1457552\_at 1.10516 zinc finger protein 295 Zfp295  
 1457553\_at 2.39585 "CUG triplet repeat, RNA binding protein 2" Cugbp2  
 1457554\_at 0.83311 apolipoprotein B Apob  
 1457555\_at 0.97979 G protein-coupled receptor 151 Gpr151  
 1457556\_at 0.84811 "PREDICTED: Mus musculus hypothetical LOC433662 (LOC433662), mRNA" ---  
 1457557\_at 1.13245 RIKEN cDNA A330076H08 gene A330076H08Rik  
 1457558\_at 1.08296 RIKEN cDNA A330050F15 gene A330050F15Rik  
 1457559\_at 1.22887 WW domain containing adaptor with coiled-coil Wac  
 1457560\_at 1.24242 Single-stranded DNA binding protein 3 Ssbp3  
 1457561\_at 1.06950 integrin alpha 5 (fibronectin receptor alpha) Itga5  
 1457562\_at 1.21809 "ribosomal protein S6 kinase, polypeptide 1" Rps6kb1  
 1457563\_at 0.88078 epidermal growth factor receptor Egfr  
 1457564\_at 1.08793 "DNA fragmentation factor, alpha subunit" Dffa  
 1457565\_at 1.00207 RIKEN cDNA C130052G03 gene C130052G03Rik  
 1457566\_at 0.97186 RIKEN cDNA A830058L05 gene A830058L05Rik  
 1457567\_at 1.00005 N-acetylglucosamine kinase Nagk  
 1457568\_at 1.00774 hypothetical protein C230004L04 C230004L04  
 1457569\_at 1.88047 "DNA segment, Chr 8, ERATO Doi 51, expressed" D8Ertd51e  
 1457570\_at 0.88611 RIKEN cDNA A230001M10 gene A230001M10Rik  
 1457571\_at 0.73263 zinc finger protein 68 Zfp68  
 1457572\_at 1.09603 "Membrane associated guanylate kinase, WW and PDZ domain containing 1" Magi1  
 1457573\_at 1.03961 Topoisomerase (DNA) I Top1  
 1457574\_at 0.96238 similar to F-box and WD-40 domain protein FBXW14 /// similar to F-box and WD-40 domain protein FBXW14 LOC635668 /// LOC665428  
 1457575\_at 1.08516 expressed sequence AU021128 AU021128

1457576\_at 0.79751 --- ---  
 1457577\_at 0.91522 --- ---  
 1457578\_at 1.09028 "Peroxisome proliferative activated receptor, gamma, coactivator 1 beta"  
 Ppargc1b  
 1457579\_at 1.41859 "DNA segment, Chr 11, ERATO Doi 717, expressed" D11Ertd717e  
 1457580\_at 1.13635 chromodomain helicase DNA binding protein 8 Chd8  
 1457581\_at 1.00031 UBX domain containing 3 Ubx3  
 1457582\_at 0.94831 "Ubiquitously transcribed tetratricopeptide repeat gene, Y chromosome" Uty  
 1457583\_at 0.92802 "ST6 (alpha-N-acetyl-neuraminyl-2,3-beta-galactosyl-1,3)-N-  
 acetylglactosaminide alpha-2,6-sialyltransferase 3" St6galnac3  
 1457584\_at 1.01492 expressed sequence AI848100 AI848100  
 1457585\_at 0.89994 transmembrane protein 24 Tmem24  
 1457586\_at 1.36471 RAS p21 protein activator 2 Rasa2  
 1457587\_at 0.98088 Dendritic cell protein GA17 Ga17  
 1457588\_at 1.54509 expressed sequence C76213 C76213  
 1457589\_at 0.87668 FAT tumor suppressor homolog 3 (Drosophila) Fat3  
 1457590\_at 1.16845 "Purinergic receptor P2X, ligand-gated ion channel, 1" P2rx1  
 1457591\_at 1.18187 Nucleolar protein 10 Nol10  
 1457592\_x\_at 0.93886 RIKEN cDNA 2210018M03 gene 2210018M03Rik  
 1457593\_at 1.19020 RIKEN cDNA 2610202C22 gene 2610202C22Rik  
 1457594\_at 0.92269 Transcribed locus ---  
 1457595\_at 0.93012 "2 cells egg cDNA, RIKEN full-length enriched library, clone:B020028D20  
 product:hypothetical protein, full insert sequence" ---  
 1457596\_at 0.98113 Son cell proliferation protein Son  
 1457597\_at 0.80020 Transcribed locus ---  
 1457598\_at 1.18724 Thioredoxin-like 2 Txnl2  
 1457599\_at 0.92444 RIKEN cDNA 2310047H23 gene 2310047H23Rik  
 1457600\_x\_at 1.11380 Naked cuticle 2 homolog (Drosophila) Nkd2  
 1457601\_at 1.03692 "Adult male liver tumor cDNA, RIKEN full-length enriched library, clone:  
 C730010C06 product:unclassifiable, full insert sequence" ---  
 1457602\_at 0.96042 "16 days neonate thymus cDNA, RIKEN full-length enriched library, clone:  
 A130043M03 product:unclassifiable, full insert sequence" ---  
 1457603\_at 0.98412 "protein phosphatase 1, regulatory (inhibitor) subunit 9A" Ppp1r9a  
 1457604\_x\_at 0.83160 "cytochrome P450, family 11, subfamily a, polypeptide 1" Cyp11a1  
 1457605\_at 1.13538 Ataxin 1 Atxn1  
 1457606\_x\_at 0.96208 expressed sequence AU015228 AU015228  
 1457607\_at 0.89163 expressed sequence AW046457 AW046457  
 1457608\_at 0.91710 "GTPase, IMAP family member 8" Gimap8  
 1457609\_at 1.01534 "Adenosine deaminase, RNA-specific, B2" Adarb2  
 1457610\_at 0.95017 Expressed sequence AL033326 AL033326  
 1457611\_x\_at 0.99308 RIKEN cDNA 2010309E21 gene 2010309E21Rik  
 1457612\_at 1.14557 similar to glyceraldehyde-3-phosphate dehydrogenase /// similar to  
 glyceraldehyde-3-phosphate dehydrogenase (phosphorylating)-like /// similar to glyceraldehyde-3-



1457629\_at 1.04197 cDNA sequence BC060631 BC060631  
1457630\_at 1.12364 Wolf-Hirschhorn syndrome candidate 1-like 1 (human) Whsc111  
1457631\_at 1.08424 RIKEN cDNA 2310047N11 gene 2310047N11Rik  
1457632\_s\_at 1.01402 myeloid ecotropic viral integration site-related gene 1 Mrg1  
1457633\_x\_at 0.96904 "cytochrome c oxidase, subunit VI a, polypeptide 2" Cox6a2  
1457634\_at 1.15800 RIKEN cDNA 4930488E11 gene /// similar to thymosin beta-like protein ///  
similar to thymosin beta-like protein /// similar to thymosin beta-like protein 4930488E11Rik ///  
LOC666244 /// LOC669681 /// LOC674935  
1457635\_s\_at 0.85044 "nuclear receptor subfamily 3, group C, member 1" Nr3c1  
1457636\_x\_at 1.01304 --- ---  
1457637\_at 1.11254 Prickle like 1 (Drosophila) Prickle1  
1457638\_x\_at 0.88978 replication factor C (activator 1) 2 Rfc2  
1457639\_at 1.01331 "ATPase, H<sup>+</sup> transporting, lysosomal V1 subunit H" Atp6v1h  
1457640\_x\_at 0.94804 Transcribed locus ---  
1457641\_at 1.26250 CREB binding protein Crebbp  
1457642\_at 1.13431 RIKEN cDNA 5730507N06 gene 5730507N06Rik  
1457643\_x\_at 0.99333 RIKEN cDNA 2610316D01 gene 2610316D01Rik  
1457644\_s\_at 6.88001 chemokine (C-X-C motif) ligand 1 Cxcl1  
1457645\_at 1.01599 RIKEN cDNA C130079G13 gene C130079G13Rik  
1457646\_at 0.99514 "homeo box A11, opposite strand transcript" Hoxa11os  
1457647\_x\_at 0.97439 RIKEN cDNA 1600023N17 gene 1600023N17Rik  
1457648\_x\_at 1.12902 cDNA sequence BC004044 BC004044  
1457649\_x\_at 0.99975 expressed sequence AI848149 AI848149  
1457650\_x\_at 1.05312 autophagy-related 4A (yeast) /// similar to Cysteine protease ATG4A  
(Autophagy-related protein 4 homolog A) (Autophagin-2) (Autophagy-related cysteine endopeptidase 2)  
(AUT-like 2 cysteine endopeptidase) /// similar to Cysteine protease ATG4A (Autophagy-related protein  
4 homolog A) (Autophagin-2) (Autophagy-related cysteine endopeptidase 2) (AUT-like 2 cysteine  
endopeptidase) Atg4a /// LOC666476 /// LOC675173  
1457651\_x\_at 0.76769 rad and gem related GTP binding protein 2 Rem2  
1457652\_x\_at 0.90854 Prostaglandin-endoperoxide synthase 1 Ptgs1  
1457653\_at 1.02482 RIKEN cDNA A630042L21 gene A630042L21Rik  
1457654\_at 0.99328 "Transcribed locus, moderately similar to NP\_598437.1 O-sialoglycoprotein  
endopeptidase [Mus musculus]" ---  
1457655\_x\_at 0.92245 Rho GTPase activating protein 27 Arhgap27  
1457656\_s\_at 0.96687 RIKEN cDNA C230085N15 gene C230085N15Rik  
1457657\_at 1.20275 --- ---  
1457658\_x\_at 1.03820 annexin A4 Anxa4  
1457659\_x\_at 0.95429 outer dense fiber of sperm tails 1 Odf1  
1457660\_x\_at 1.11876 RIKEN cDNA 5430416O09 gene 5430416O09Rik  
1457661\_at 1.07958 RIKEN cDNA B930036G03 gene B930036G03Rik  
1457662\_x\_at 0.80013 thiamine pyrophosphokinase Tpk1  
1457663\_at 1.03604 RIKEN cDNA 1700006F04 gene 1700006F04Rik  
1457664\_x\_at 0.88246 Complement component 2 (within H-2S) C2

|              |         |                                                                     |               |
|--------------|---------|---------------------------------------------------------------------|---------------|
| 1457665_x_at | 0.99169 | "cytochrome P450, family 27, subfamily a, polypeptide 1"            | Cyp27a1       |
| 1457666_s_at | 1.39055 | interferon activated gene 202B                                      | Ifi202b       |
| 1457667_x_at | 0.92583 | dual-specificity tyrosine-(Y)-phosphorylation regulated kinase 2    | Dyrk2         |
| 1457668_x_at | 1.00940 | EBNA1 binding protein 2                                             | Ebna1bp2      |
| 1457669_x_at | 0.88743 | replication factor C (activator 1) 2                                | Rfc2          |
| 1457670_s_at | 0.96859 | lamin A                                                             | Lmna          |
| 1457671_at   | 1.00921 | RIKEN cDNA 9330120H11 gene                                          | 9330120H11Rik |
| 1457672_at   | 0.78989 | chromodomain helicase DNA binding protein 9                         | Chd9          |
| 1457673_at   | 1.17146 | RIKEN cDNA 2610005L07 gene                                          | 2610005L07Rik |
| 1457674_at   | 1.04855 | vacuolar protein sorting 13A (yeast)                                | Vps13a        |
| 1457675_at   | 1.05121 | RIKEN cDNA 2510002D24 gene                                          | 2510002D24Rik |
| 1457676_at   | 1.12290 | toll-interleukin 1 receptor (TIR) domain-containing adaptor protein | Tirap         |
| 1457677_at   | 0.90416 | CDNA sequence BC057593                                              | BC057593      |
| 1457678_at   | 1.12695 | RIKEN cDNA 2310035C23 gene                                          | 2310035C23Rik |
| 1457679_at   | 1.03086 | "DNA cross-link repair 1C, PSO2 homolog (S. cerevisiae)"            | Dclre1c       |
| 1457680_a_at | 0.99514 | transmembrane protein 69                                            | Tmem69        |
| 1457681_at   | 1.00004 | RIKEN cDNA 2610301F02 gene                                          | 2610301F02Rik |
| 1457682_at   | 0.96963 | RIKEN cDNA 9030420J04 gene                                          | 9030420J04Rik |
| 1457683_at   | 1.00799 | "glutamate receptor, ionotropic, kainate 2 (beta 2)"                | Grik2         |
| 1457684_at   | 0.86876 | RIKEN cDNA 1700037H04 gene                                          | 1700037H04Rik |
| 1457685_at   | 0.83986 | RIKEN cDNA D330034E10 gene                                          | D330034E10Rik |
| 1457686_at   | 0.97259 | RIKEN cDNA B230333C21 gene                                          | B230333C21Rik |
| 1457687_at   | 0.87368 | B-cell leukemia/lymphoma 2                                          | Bcl2          |
| 1457688_at   | 0.81561 | zinc finger protein 398                                             | Zfp398        |
| 1457689_at   | 1.04893 | SET binding factor 2                                                | Sbf2          |
| 1457690_at   | 1.03788 | "kalirin, RhoGEF kinase"                                            | Kalrn         |
| 1457691_at   | 0.90493 | Epstein-Barr virus induced gene 2                                   | Ebi2          |
| 1457692_at   | 1.22956 | ---                                                                 | ---           |
| 1457693_a_at | 1.09617 | RIKEN cDNA 6430537H07 gene                                          | 6430537H07Rik |
| 1457694_at   | 0.97858 | RIKEN cDNA 6430537H07 gene                                          | 6430537H07Rik |
| 1457695_at   | 1.08748 | AP1 gamma subunit binding protein 1                                 | Ap1gbp1       |
| 1457696_at   | 0.92958 | Rab interacting lysosomal protein                                   | Rilp          |
| 1457697_at   | 1.05796 | RIKEN cDNA A330021E22 gene                                          | A330021E22Rik |
| 1457698_at   | 0.91626 | expressed sequence AI314831                                         | AI314831      |
| 1457699_at   | 1.07486 | RIKEN cDNA E330009J07 gene                                          | E330009J07Rik |
| 1457700_at   | 1.10743 | RIKEN cDNA 4732474A20 gene                                          | 4732474A20Rik |
| 1457701_at   | 0.93290 | transmembrane protein 136                                           | Tmem136       |
| 1457702_at   | 0.91678 | G-protein coupled receptor 12                                       | Gpr12         |
| 1457703_at   | 0.98879 | expressed sequence BE686333                                         | BE686333      |
| 1457704_at   | 0.93681 | zinc finger protein 533                                             | Zfp533        |
| 1457705_at   | 0.97214 | RIKEN cDNA 5330421C15 gene                                          | 5330421C15Rik |
| 1457706_at   | 0.89262 | cDNA sequence BC030336                                              | BC030336      |
| 1457707_at   | 1.05585 | "gene model 489, (NCBI)"                                            | Gm489         |



1457708\_at 0.98170 methyl-CpG binding domain protein 4 Mbd4  
 1457709\_a\_at 1.02964 RIKEN cDNA A930005H10 gene A930005H10Rik  
 1457710\_at 0.91333 zinc fingers and homeoboxes 3 Zhx3  
 1457711\_at 1.11797 RAN binding protein 3 Ranbp3  
 1457712\_at 1.33591 chromodomain helicase DNA binding protein 8 Chd8  
 1457713\_at 0.94760 "Excision repair cross-complementing rodent repair deficiency,  
 complementation group 5" Ercc5  
 1457714\_at 1.00872 RIKEN cDNA 2310005N03 gene 2310005N03Rik  
 1457715\_at 0.94906 RIKEN cDNA 1010001B22 gene 1010001B22Rik  
 1457716\_at 0.99191 OTU domain containing 7B Otud7b  
 1457717\_at 0.96281 expressed sequence AI987986 AI987986  
 1457718\_at 0.98809 RIKEN cDNA D030022P06 gene D030022P06Rik  
 1457719\_at 0.95562 Transcribed locus ---  
 1457720\_at 0.98106 --- ---  
 1457721\_at 1.01191 Expressed sequence AI118064 AI118064  
 1457722\_at 0.99388 killer cell lectin-like receptor subfamily B member 1F Klrb1f  
 1457723\_at 1.92499 Paraspeckle protein 1 Pspc1  
 1457724\_at 0.88598 cathepsin L Ctsl  
 1457725\_at 0.98188 "Membrane-spanning 4-domains, subfamily A, member 4B" Ms4a4b  
 1457726\_at 1.04018 ribosomal protein S15a Rps15a  
 1457727\_at 1.27863 hypothetical protein LOC544864 LOC544864  
 1457728\_at 0.99193 6-phosphogluconolactonase Pgl5  
 1457729\_at 1.03581 Transcribed locus ---  
 1457730\_at 0.96185 "Fanconi anemia, complementation group M" Fancm  
 1457731\_at 1.11696 "small nuclear RNA activating complex, polypeptide 3" Snapc3  
 1457732\_at 1.09567 Protein-L-isoaspartate (D-aspartate) O-methyltransferase domain containing 2  
 Pcmt2  
 1457733\_at 0.97510 Transcribed locus ---  
 1457734\_at 1.03669 "POU domain, class 3, transcription factor 2" Pou3f2  
 1457735\_at 0.95434 Transcribed locus ---  
 1457736\_at 0.85601 vacuolar protein sorting 37D (yeast) Vps37d  
 1457737\_at 1.00854 hypothetical protein E130012K09 E130012K09  
 1457738\_at 1.04079 "LSM14 homolog A (SCD6, S. cerevisiae)" Lsm14a  
 1457739\_at 1.08837 "fascin homolog 1, actin bundling protein (Strongylocentrotus purpuratus)"  
 Fscn1  
 1457740\_at 1.22152 Aryl hydrocarbon receptor nuclear translocator-like Arntl  
 1457741\_at 1.02048 --- ---  
 1457742\_at 0.98832 "DNA segment, Chr 9, Wayne State University 74, expressed" D9Wsu74e  
 1457743\_at 1.03563 "DNA segment, Chr 13, Brigham & Women's Genetics 1146 expressed"  
 D13Bwg1146e  
 1457744\_at 1.04695 DEAD (Asp-Glu-Ala-Asp) box polypeptide 46 Ddx46  
 1457745\_at 1.00669 G protein-coupled receptor 4 Gpr4  
 1457746\_at 1.94666 RIKEN cDNA 2610028H07 gene 2610028H07Rik

1457747\_at 0.95779 RIKEN cDNA 9330109K16 gene 9330109K16Rik  
1457748\_at 1.05352 pogo transposable element with ZNF domain Pogz  
1457749\_at 1.03650 coiled-coil and C2 domain containing 1B Cc2d1b  
1457750\_at 1.01812 "DNA segment, Chr 16, ERATO Doi 780, expressed" D16Ertd780e  
1457751\_at 1.05523 RIKEN cDNA 4832420A03 gene 4832420A03Rik  
1457752\_at 0.96879 expressed sequence AU014876 AU014876  
1457753\_at 1.00142 toll-like receptor 13 Tlr13  
1457754\_at 1.04785 RIKEN cDNA 4930430F08 gene 4930430F08Rik  
1457755\_at 1.05101 "guanine nucleotide binding protein (G protein), gamma 8 subunit" Gng8  
1457756\_at 0.91071 zinc finger protein 192 Zfp192  
1457757\_at 1.05732 similar to granulosa cell HMG-box protein-1 LOC269389  
1457758\_at 0.95281 enhancer of yellow 2 homolog (Drosophila) Eny2  
1457759\_at 1.00166 RIKEN cDNA A630081D01 gene A630081D01Rik  
1457760\_at 1.37518 RIKEN cDNA A930004J17 gene A930004J17Rik  
1457761\_at 0.92289 expressed sequence C79607 C79607  
1457762\_at 1.11515 Tetratricopeptide repeat domain 15 Ttc15  
1457763\_at 0.96115 "Gamma-aminobutyric acid (GABA-A) receptor, subunit delta" Gabrd  
1457764\_at 0.93556 RIKEN cDNA A530058O07 gene A530058O07Rik  
1457765\_at 2.43631 "Proteasome (prosome, macropain) 26S subunit, non-ATPase, 14" Psm14  
1457766\_at 0.97141 WAP four-disulfide core domain 6A Wfdc6a  
1457767\_at 0.90761 Nischarin Nisch  
1457768\_at 1.62196 prune homolog (Drosophila) Prune  
1457769\_at 0.92226 histocompatibility 60 H60  
1457770\_at 0.89020 "solute carrier family 39 (zinc transporter), member 14" Slc39a14  
1457771\_at 0.96914 "Protein tyrosine phosphatase, receptor type, O" Ptpro  
1457772\_at 0.99799 "Adult male aorta and vein cDNA, RIKEN full-length enriched library, clone:  
A530055C18 product:unclassifiable, full insert sequence" ---  
1457773\_at 0.97959 SLAM family member 6 Slamf6  
1457774\_at 1.07275 RIKEN cDNA 2310079N02 gene 2310079N02Rik  
1457775\_at 0.99857 saccin Sacs  
1457776\_at 1.01665 "DNA segment, Chr 9, ERATO Doi 720, expressed" D9Ertd720e  
1457777\_at 1.05810 gasdermin 1 Gsdm1  
1457778\_at 0.96544 storkhead box 2 Stox2  
1457779\_at 0.76349 RIKEN cDNA 1110046J04 gene 1110046J04Rik  
1457780\_at 0.99026 syntaxin 11 Stx11  
1457781\_at 1.91062 KCNQ1 overlapping transcript 1 Kcnq1ot1  
1457782\_at 1.29791 talin 1 Tln1  
1457783\_at 1.21332 "RAB12, member RAS oncogene family" Rab12  
1457784\_at 0.92389 --- ---  
1457785\_at 0.95900 "Zinc finger, SWIM domain containing 3" Zswim3  
1457786\_at 1.13286 Sialic acid binding Ig-like lectin H Siglech  
1457787\_at 0.91262 --- ---  
1457788\_at 1.53070 Ras association (RalGDS/AF-6) domain family 1 Rassf1

1457789\_at 1.13593 "ceroid lipofuscinosis, neuronal 3, juvenile (Batten, Spielmeier-Vogt disease)"  
Cln3

1457790\_at 0.88288 Ankyrin repeat and SOCS box-containing protein 3 Asb3

1457791\_at 1.13552 RIKEN cDNA B830008H07 gene B830008H07Rik

1457792\_at 1.13901 Limb region 1 like Lmbr11

1457793\_a\_at 1.43094 Wolf-Hirschhorn syndrome candidate 1-like 1 (human) Whsc111

1457794\_at 1.20713 Wolf-Hirschhorn syndrome candidate 1-like 1 (human) Whsc111

1457795\_at 1.05638 Secretory carrier membrane protein 4 Scamp4

1457796\_at 1.03799 Ubiquitin protein ligase E3 component n-recognin 1 Ubr1

1457797\_at 0.96529 expressed sequence AI605517 AI605517

1457798\_at 1.08031 RIKEN cDNA C130039O16 gene C130039O16Rik

1457799\_at 1.05593 "potassium voltage-gated channel, delayed-rectifier, subfamily S, member 3"  
Kcns3

1457800\_at 1.07422 RIKEN cDNA 2900019G14 gene 2900019G14Rik

1457801\_at 1.01172 RIKEN cDNA 9930024M15 gene 9930024M15Rik

1457802\_at 0.92733 RIKEN cDNA B930012P20 gene B930012P20Rik

1457803\_at 1.32867 "Protein kinase, AMP-activated, gamma 1 non-catalytic subunit" Prkag1

1457804\_at 0.95053 Syntaxin 8 Stx8

1457805\_at 1.13388 --- ---

1457806\_at 1.46675 dedicator of cyto-kinesis 1 Dock1

1457807\_at 1.04328 Glucosamine-phosphate N-acetyltransferase 1 Gnpnat1

1457808\_at 0.96254 hypothetical LOC432842 LOC432842

1457809\_at 1.12589 p300/CBP-associated factor /// similar to p300/CBP-associated factor Pcaf ///  
LOC330129

1457810\_at 0.93373 zinc finger and BTB domain containing 37 Zbtb37

1457811\_at 0.94149 --- ---

1457812\_at 1.00639 transformation related protein 53 binding protein 1 Trp53bp1

1457813\_at 1.35680 Mitochondrial ribosomal protein S18A Mrps18a

1457814\_at 2.35972 RIKEN cDNA 1110014D18 gene 1110014D18Rik

1457815\_at 1.20264 Nucleoporin 214 Nup214

1457816\_at 0.98069 caspase 9 Casp9

1457817\_at 1.12088 Breast carcinoma amplified sequence 3 Bcas3

1457818\_at 1.09975 "General transcription factor II H, polypeptide 2" Gtf2h2

1457819\_at 1.22606 "sodium channel, voltage-gated, type IX, alpha /// similar to sodium channel  
25" Scn9a /// LOC671835

1457820\_at 0.92002 --- ---

1457821\_at 1.18826 RIKEN cDNA 2610511M17 gene 2610511M17Rik

1457822\_at 0.92616 --- ---

1457823\_at 0.82212 cysteine rich protein 61 Cyr61

1457824\_at 1.25560 "Adult male bone cDNA, RIKEN full-length enriched library,  
clone:9830165G24 product:unclassifiable, full insert sequence" ---

1457825\_x\_at 0.67516 transcobalamin 2 Tcn2

1457826\_a\_at 0.93300 RIKEN cDNA 1810043H04 gene 1810043H04Rik

1457827\_at 1.03007 arylsulfatase J Arsj  
1457828\_at 1.04990 signal transducing adaptor molecule (SH3 domain and ITAM motif) 1 Stam  
1457829\_at 0.94245 calmegin Clgn  
1457830\_at 1.12390 Neuroepithelial cell transforming gene 1 Net1  
1457831\_at 0.98783 tripartite motif-containing 61 Trim61  
1457832\_at 1.06029 "7 days neonate cerebellum cDNA, RIKEN full-length enriched library, clone:  
A730031J22 product:unclassifiable, full insert sequence" ---  
1457833\_at 0.95910 expressed sequence AI450241 AI450241  
1457834\_at 0.90328 YY1 transcription factor Yy1  
1457835\_at 1.11308 hypothetical protein C920025J10 C920025J10  
1457836\_at 1.30240 RIKEN cDNA 2600014M03 gene 2600014M03Rik  
1457837\_at 0.78615 cDNA sequence BC033606 /// similar to phospholipase B BC033606 ///  
LOC665270  
1457838\_at 1.16742 cell division cycle 45 homolog (S. cerevisiae)-like Cdc451  
1457839\_at 1.50990 DEAH (Asp-Glu-Ala-His) box polypeptide 40 Dhx40  
1457840\_at 0.85615 plexin A4 Plxna4  
1457841\_at 1.01172 "In vitro fertilized eggs cDNA, RIKEN full-length enriched library,  
clone:7420405G17 product:unclassifiable, full insert sequence" ---  
1457842\_at 2.94993 Zinc finger protein 292 Zfp292  
1457843\_at 0.98009 LY6/PLAUR domain containing 6 Lypd6  
1457844\_a\_at 0.95763 RIKEN cDNA 8430427H17 gene 8430427H17Rik  
1457845\_at 1.37176 RIKEN cDNA 1110059P08 gene 1110059P08Rik  
1457846\_at 1.04397 "COX11 homolog, cytochrome c oxidase assembly protein (yeast)" Cox11  
1457847\_at 1.01423 Regulatory factor X domain containing 2 homolog (human) Rfxdc2  
1457848\_at 1.24988 RIKEN cDNA A930016P21 gene A930016P21Rik  
1457849\_at 1.02496 UDP-N-acetyl-alpha-D-galactosamine:polypeptide N-  
acetylgalactosaminyltransferase 4 Galnt4  
1457850\_at 1.00174 "Solute carrier family 7 (cationic amino acid transporter, y+ system), member  
14" Slc7a14  
1457851\_at 0.90607 "DNA segment, Chr 10, ERATO Doi 276, expressed" D10Ertd276e  
1457852\_at 1.19181 Latent transforming growth factor beta binding protein 1 Ltbp1  
1457853\_at 1.07676 CDNA sequence BC021785 BC021785  
1457854\_at 1.02307 expressed sequence AU018877 AU018877  
1457855\_at 0.95331 "retinol binding protein 3, interstitial" Rbp3  
1457856\_at 0.99645 --- ---  
1457857\_at 1.08121 --- ---  
1457858\_at 0.89411 similar to RNA and export factor binding protein 2 LOC226957  
1457859\_at 1.04860 ADP-ribosylation factor-like 15 Arl15  
1457860\_at 0.98659 --- ---  
1457861\_at 0.98778 RIKEN cDNA A230009B12 gene A230009B12Rik  
1457862\_at 1.02222 --- ---  
1457863\_at 1.02003 --- ---  
1457864\_at 0.98210 RAB11 family interacting protein 3 (class II) Rab11fip3

1457865\_at 0.95858 "Pam, highwire, rpm 1" Phr1  
1457866\_at 0.94939 expressed sequence C77717 C77717  
1457867\_at 0.71229 sphingosine-1-phosphate phosphatase 2 Sgpp2  
1457868\_at 0.97340 "Solute carrier family 2 (facilitated glucose transporter), member 13" Slc2a13  
1457869\_at 1.31064 --- ---  
1457870\_at 1.02280 Transcribed locus ---  
1457871\_at 0.98073 collectin sub-family member 10 Colec10  
1457872\_at 0.94950 --- ---  
1457873\_at 1.00331 "11 days embryo gonad cDNA, RIKEN full-length enriched library, clone:7030407I18 product:unclassifiable, full insert sequence" ---  
1457874\_at 1.15842 "Adult male testis cDNA, RIKEN full-length enriched library, clone:4930550J05 product:unclassifiable, full insert sequence" ---  
1457875\_at 0.89586 host cell factor C1 Hcfc1  
1457876\_at 0.87251 "DNA segment, Chr 9, ERATO Doi 496, expressed" D9Ertd496e  
1457877\_at 0.99040 Estrogen receptor 1 (alpha) Esr1  
1457878\_at 0.88269 RIKEN cDNA C430042M11 gene C430042M11Rik  
1457879\_at 0.95887 RIKEN cDNA A230107O07 gene A230107O07Rik  
1457880\_at 0.92141 Transcribed locus ---  
1457881\_at 0.74648 oxysterol binding protein-like 6 Osbpl6  
1457882\_at 1.06430 RIKEN cDNA 5730466H23 gene 5730466H23Rik  
1457883\_at 1.00484 "Adult male aorta and vein cDNA, RIKEN full-length enriched library, clone: A530095B21 product:unclassifiable, full insert sequence" ---  
1457884\_at 1.12305 RIKEN cDNA 4732496C06 gene 4732496C06Rik  
1457885\_at 1.21130 "Protein kinase, AMP-activated, gamma 2 non-catalytic subunit" Prkag2  
1457886\_at 0.93702 hypothetical LOC552873 LOC552873  
1457887\_at 0.84008 SCO-spondin Sspo  
1457888\_at 1.77256 Polycomb group ring finger 5 Pcgf5  
1457889\_at 1.66586 expressed sequence AU014972 AU014972  
1457890\_at 0.91881 "DNA segment, Chr 6, ERATO Doi 234, expressed" D6Ertd234e  
1457891\_at 0.98047 RIKEN cDNA C230011H18 gene C230011H18Rik  
1457892\_at 0.93266 Transcribed locus ---  
1457893\_at 0.90657 Protein tyrosine phosphatase-like A domain containing 2 Ptplad2  
1457894\_at 0.94616 --- ---  
1457895\_at 0.90092 kinesin family member 18A Kif18a  
1457896\_at 1.00637 estrogen-related receptor gamma Esrrg  
1457897\_at 0.80700 Transcribed locus ---  
1457898\_at 0.92602 Dendritic cell protein GA17 Ga17  
1457899\_at 1.07585 "kalirin, RhoGEF kinase" Kalrn  
1457900\_at 0.93801 activating signal cointegrator 1 complex subunit 3 Ascc3  
1457901\_at 1.05021 "DNA segment, Chr 4, ERATO Doi 76, expressed" D4Ertd76e  
1457902\_at 0.86626 "Transcribed locus, moderately similar to XP\_576460.1 PREDICTED: similar to hypothetical protein PB402898.00.0 [Rattus norvegicus]" ---  
1457903\_at 0.85756 Heme binding protein 1 Hebp1

1457904\_at 0.93061 carbonic anhydrase 8 Car8  
1457905\_at 0.93241 "DNA segment, Chr 7, ERATO Doi 59, expressed" D7Ertd59e  
1457906\_at 0.99747 RNA binding motif protein 13 Rbm13  
1457907\_at 0.90678 NIMA (never in mitosis gene a)-related expressed kinase 7 Nek7  
1457908\_at 1.93275 Zinc finger protein 407 Zfp407  
1457909\_at 0.94671 DNA2 DNA replication helicase 2-like (yeast) Dna2l  
1457910\_at 1.38004 Formin-like 2 Fmnl2  
1457911\_at 1.12281 RIKEN cDNA A930002I21 gene A930002I21Rik  
1457912\_at 1.00345 RIKEN cDNA E130317F20 gene E130317F20Rik  
1457913\_at 1.41427 RIKEN cDNA 5730601F06 gene 5730601F06Rik  
1457914\_at 1.12268 "Adult retina cDNA, RIKEN full-length enriched library, clone:A930016I24  
product:unclassifiable, full insert sequence" ---  
1457915\_at 1.15556 RIKEN cDNA 4833442J19 gene 4833442J19Rik  
1457916\_at 0.95447 --- ---  
1457917\_at 1.00212 Lymphocyte protein tyrosine kinase Lck  
1457918\_at 0.98738 "Tumor necrosis factor, alpha-induced protein 2" Tnfaip2  
1457919\_at 0.88860 RIKEN cDNA D030054H15 gene D030054H15Rik  
1457920\_at 1.01803 RIKEN cDNA C130026L21 gene C130026L21Rik  
1457921\_at 0.79749 RIKEN cDNA 1810037C20 gene 1810037C20Rik  
1457922\_at 1.36495 --- ---  
1457923\_at 0.98414 RIKEN cDNA C130045F17 gene C130045F17Rik  
1457924\_at 0.90800 muscleblind-like 1 (Drosophila) Mbnl1  
1457925\_at 1.06988 RIKEN cDNA C530049I24 gene C530049I24Rik  
1457926\_at 0.99248 arginyl aminopeptidase (aminopeptidase B)-like 1 Rnpepl1  
1457927\_at 1.04449 "transient receptor potential cation channel, subfamily M, member 3" Trpm3  
1457928\_at 0.98780 RIKEN cDNA 4930435E12 gene 4930435E12Rik  
1457929\_at 0.91108 transformed mouse 3T3 cell double minute 2 Mdm2  
1457930\_at 1.38669 "jumonji, AT rich interactive domain 1C (Rbp2 like)" Jarid1c  
1457931\_at 1.00473 --- ---  
1457932\_at 0.89684 Human immunodeficiency virus type I enhancer binding protein 2 Hivep2  
1457933\_at 1.05583 "Gene model 1964, (NCBI)" Gm1964  
1457934\_at 0.95808 RNA binding motif protein 12 Rbm12  
1457935\_at 1.23868 Teashirt zinc finger family member 2 Tshz2  
1457936\_at 0.94890 mitogen activated protein kinase 8 Mapk8  
1457937\_at 1.03297 RIKEN cDNA A430088P11 gene A430088P11Rik  
1457938\_at 0.96559 Nuclear receptor co-repressor 1 Ncor1  
1457939\_at 1.03266 RIKEN cDNA 4930578N16 gene 4930578N16Rik  
1457940\_at 0.89026 Ribosomal protein S17 Rps17  
1457941\_at 1.02560 "PREDICTED: Mus musculus similar to serine-threonine protein kinase pim-2  
isoform 1 (LOC622647), mRNA" ---  
1457942\_at 0.88440 Transcribed locus ---  
1457943\_at 1.01196 RIKEN cDNA 1700011J10 gene 1700011J10Rik  
1457944\_at 1.74298 Ets variant gene 6 (TEL oncogene) Etv6

1457945\_at 1.00300 "Eukaryotic translation initiation factor 2, subunit 3, structural gene Y-linked" Eif2s3y  
1457946\_at 0.86885 OG9 homeobox gene Og9x  
1457947\_at 0.99018 DEAD (Asp-Glu-Ala-Asp) box polypeptide 49 Ddx49  
1457948\_at 1.07436 Transcribed locus ---  
1457949\_at 0.88155 Transcribed locus ---  
1457950\_at 0.75444 Latrophilin 3 Lphn3  
1457951\_at 1.03311 RIKEN cDNA 4930434E21 gene 4930434E21Rik  
1457952\_at 0.98939 CD80 antigen Cd80  
1457953\_at 0.92003 "PREDICTED: Mus musculus hypothetical protein LOC629238 (LOC629238), mRNA" ---  
1457954\_at 0.95402 --- ---  
1457955\_at 1.08292 "Golgi associated, gamma adaptin ear containing, ARF binding protein 2" Gga2  
1457956\_at 0.97800 RIKEN cDNA 2310058O09 gene 2310058O09Rik  
1457957\_at 0.96445 Transcribed locus ---  
1457958\_at 1.28660 Ankyrin repeat domain 26 Ankrd26  
1457959\_at 0.99663 Transcribed locus ---  
1457960\_at 0.93965 Transcribed locus ---  
1457961\_at 0.80973 --- ---  
1457962\_at 1.00858 --- ---  
1457963\_at 0.87985 Transcribed locus ---  
1457964\_at 1.04696 RIKEN cDNA 1810044D09 gene 1810044D09Rik  
1457965\_at 1.01331 Transcribed locus ---  
1457966\_at 1.39350 F-box and leucine-rich repeat protein 7 Fbxl7  
1457967\_at 0.80169 RIKEN cDNA A030003K21 gene A030003K21Rik  
1457968\_at 1.12948 Transmembrane protein 23 Tmem23  
1457969\_at 1.12483 RAB interacting factor Rabif  
1457970\_at 1.17048 --- ---  
1457971\_at 1.09504 Centrosome and spindle pole associated protein 1 Csppl  
1457972\_at 0.88728 Expressed sequence C87436 C87436  
1457973\_at 1.04927 Protocadherin 9 Pcdh9  
1457974\_at 1.10057 --- ---  
1457975\_at 0.95100 GTP binding protein 3 Gtpbp3  
1457976\_at 1.13594 RIKEN cDNA 2010002M12 gene 2010002M12Rik  
1457977\_at 0.85833 RIKEN cDNA 2310005N01 gene 2310005N01Rik  
1457978\_at 1.04082 "Centaurin, gamma 2" Centg2  
1457979\_at 1.01137 "Adult male hypothalamus cDNA, RIKEN full-length enriched library, clone: A230017C18 product:unclassifiable, full insert sequence" ---  
1457980\_x\_at 0.91502 uridine-cytidine kinase 2 Uck2  
1457981\_x\_at 1.01384 GINS complex subunit 1 (Psf1 homolog) Gins1  
1457982\_at 0.89711 RIKEN cDNA 1700052M18 gene 1700052M18Rik  
1457983\_s\_at 0.90837 RWD domain containing 4A Rwdd4a  
1457984\_at 0.93336 corticotropin releasing hormone Crh

1457985\_at 0.91716 calmin Clmn  
1457986\_at 1.06821 Transcribed locus ---  
1457987\_at 1.40076 RIKEN cDNA 6030458C11 gene 6030458C11Rik  
1457988\_at 3.05369 SEC63-like (S. cerevisiae) Sec63  
1457989\_at 0.99691 "solute carrier family 4, sodium bicarbonate transporter-like, member 11"  
Slc4a11  
1457990\_at 1.00595 ankyrin repeat and sterile alpha motif domain containing 1B /// similar to AIDA-  
1b Anks1b /// LOC544718  
1457991\_at 1.22052 "ATP-binding cassette, sub-family D (ALD), member 3" Abcd3  
1457992\_at 1.04925 RNA terminal phosphate cyclase-like 1 Rcl1  
1457993\_at 1.07484 --- ---  
1457994\_at 0.97437 RIKEN cDNA 4930563J15 gene 4930563J15Rik  
1457995\_at 1.01675 RIKEN cDNA F730014I05 gene F730014I05Rik  
1457996\_at 1.06055 "Tumor necrosis factor, alpha-induced protein 8" Tnfaip8  
1457997\_at 1.07819 leukocyte receptor cluster (LRC) member 4 Leng4  
1457998\_at 1.07705 Transcribed locus ---  
1457999\_at 0.92055 RIKEN cDNA 2410005O16 gene 2410005O16Rik  
1458000\_at 1.02240 desmoglein 1 alpha Dsg1a  
1458001\_at 1.01043 --- ---  
1458002\_at 0.99550 Mitogen activated protein kinase 10 Mapk10  
1458003\_at 1.34339 zinc finger protein 398 Zfp398  
1458004\_at 0.94023 paired related homeobox 1 Prrx1  
1458005\_at 1.05503 --- ---  
1458006\_at 1.06157 Carboxypeptidase M Cpm  
1458007\_at 1.04855 myosin IB Myo1b  
1458008\_at 1.08662 "Adult male corpora quadrigemina cDNA, RIKEN full-length enriched library,  
clone:B230326J17 product:unclassifiable, full insert sequence" ---  
1458009\_at 0.92837 Transcribed locus ---  
1458010\_at 1.00844 --- ---  
1458011\_s\_at 0.97805 "DNA segment, Chr 4, ERATO Doi 117, expressed" D4ErtD117e  
1458012\_at 1.00603 dachshund 2 (Drosophila) Dach2  
1458013\_at 1.06620 RNA binding motif protein 27 Rbm27  
1458014\_at 1.02743 "AF4/FMR2 family, member 2" Aff2  
1458015\_at 0.97670 multiple EGF-like-domains 11 Megf11  
1458016\_at 1.01313 --- ---  
1458017\_at 1.34894 PHD finger protein 20 Phf20  
1458018\_at 1.07955 Protein phosphatase 1H (PP2C domain containing) Ppm1h  
1458019\_at 1.04168 --- ---  
1458020\_at 0.96173 Reelin Reln  
1458021\_at 1.25390 Sorting nexin 15 Snx15  
1458022\_at 0.99161 RIKEN cDNA D830039M14 gene D830039M14Rik  
1458023\_at 1.07464 "DNA segment, Chr X, ERATO Doi 697, expressed" DXErtD697e  
1458024\_at 1.13599 hypothetical protein B930018B01 B930018B01



|            |         |                                                                                                                                                         |               |  |
|------------|---------|---------------------------------------------------------------------------------------------------------------------------------------------------------|---------------|--|
| 1458025_at | 1.00195 | ---                                                                                                                                                     | ---           |  |
| 1458026_at | 0.98185 | ---                                                                                                                                                     | ---           |  |
| 1458027_at | 1.04920 | mitochondrial ribosomal protein L17                                                                                                                     | Mrpl17        |  |
| 1458028_at | 1.17135 | Transcribed locus                                                                                                                                       | ---           |  |
| 1458029_at | 0.93820 | ---                                                                                                                                                     | ---           |  |
| 1458030_at | 0.91989 | ---                                                                                                                                                     | ---           |  |
| 1458031_at | 1.24376 | RIKEN cDNA B230315F11 gene                                                                                                                              | B230315F11Rik |  |
| 1458032_at | 0.96956 | Tumor protein D52-like 2                                                                                                                                | Tpd52l2       |  |
| 1458033_at | 1.03093 | Ubiquitin protein ligase E3 component n-recogin 1                                                                                                       | Ubr1          |  |
| 1458034_at | 0.95580 | RIKEN cDNA 1200016B10 gene                                                                                                                              | 1200016B10Rik |  |
| 1458035_at | 0.87115 | Sphingosine-1-phosphate phosphatase 2                                                                                                                   | Sgpp2         |  |
| 1458036_at | 1.01006 | Expressed sequence C77576                                                                                                                               | C77576        |  |
| 1458037_at | 1.06098 | Neurocalcin delta                                                                                                                                       | Ncald         |  |
| 1458038_at | 1.23116 | ---                                                                                                                                                     | ---           |  |
| 1458039_at | 1.14595 | Nuclear receptor coactivator 3                                                                                                                          | Ncoa3         |  |
| 1458040_at | 0.94643 | "DNA segment, Chr 7, Wayne State University 130, expressed"                                                                                             | D7Wsu130e     |  |
| 1458041_at | 1.01175 | expressed sequence C80360                                                                                                                               | C80360        |  |
| 1458042_at | 1.05297 | ---                                                                                                                                                     | ---           |  |
| 1458043_at | 1.13339 | BTB (POZ) domain containing 9                                                                                                                           | Btbd9         |  |
| 1458044_at | 0.96845 | camello-like 1                                                                                                                                          | Cml1          |  |
| 1458045_at | 0.95300 | Odd Oz/ten-m homolog 4 (Drosophila)                                                                                                                     | Odz4          |  |
| 1458046_at | 0.93772 | "0 day neonate kidney cDNA, RIKEN full-length enriched library, clone: D630027M10 product:unclassifiable, full insert sequence"                         | ---           |  |
| 1458047_at | 1.00135 | "tumor necrosis factor (ligand) superfamily, member 13b"                                                                                                | Tnfsf13b      |  |
| 1458048_at | 0.86889 | hypothetical protein 6720406K03                                                                                                                         | 6720406K03    |  |
| 1458049_at | 0.99662 | ---                                                                                                                                                     | ---           |  |
| 1458050_at | 1.16251 | ---                                                                                                                                                     | ---           |  |
| 1458051_at | 1.35483 | RIKEN cDNA A230048O21 gene                                                                                                                              | A230048O21Rik |  |
| 1458052_at | 0.99906 | Transcribed locus                                                                                                                                       | ---           |  |
| 1458053_at | 1.21614 | abl-interactor 2                                                                                                                                        | Abi2          |  |
| 1458054_at | 2.15608 | Exostoses (multiple) 1                                                                                                                                  | Ext1          |  |
| 1458055_at | 0.95999 | Desmocollin 3                                                                                                                                           | Dsc3          |  |
| 1458056_at | 2.72913 | "splicing factor, arginine/serine-rich 12"                                                                                                              | Sfrs12        |  |
| 1458057_at | 2.22517 | Caldesmon 1                                                                                                                                             | Cald1         |  |
| 1458058_at | 1.11979 | RIKEN cDNA 7030407E18 gene                                                                                                                              | 7030407E18Rik |  |
| 1458059_at | 1.00960 | ---                                                                                                                                                     | ---           |  |
| 1458060_at | 0.94171 | "10 days lactation, adult female mammary gland cDNA, RIKEN full-length enriched library, clone:D730006C24 product:unclassifiable, full insert sequence" | ---           |  |
| 1458061_at | 0.99688 | hypothetical LOC402769                                                                                                                                  | LOC402769     |  |
| 1458062_at | 1.00326 | Mitogen activated protein kinase 10                                                                                                                     | Mapk10        |  |
| 1458063_at | 0.96126 | RIKEN cDNA 4930518F22 gene                                                                                                                              | 4930518F22Rik |  |
| 1458064_at | 0.99985 | Ring finger protein 34                                                                                                                                  | Rnf34         |  |
| 1458065_at | 1.10771 | ---                                                                                                                                                     | ---           |  |

1458066\_at 0.90358 --- ---  
1458067\_at 1.03476 RIKEN cDNA A430041B07 gene A430041B07Rik  
1458068\_at 1.13323 RIKEN cDNA 4932417H02 gene 4932417H02Rik  
1458069\_at 2.18535 "TBC1 domain family, member 5" Tbc1d5  
1458070\_at 1.02335 V-set domain containing T cell activation inhibitor 1 Vtcn1  
1458071\_at 0.91348 Transcribed locus ---  
1458072\_at 1.04328 "12 days embryo spinal ganglion cDNA, RIKEN full-length enriched library, clone:D130082N20 product:unclassifiable, full insert sequence" ---  
1458073\_at 1.03988 RIKEN cDNA 9330156P08 gene 9330156P08Rik  
1458074\_at 1.03294 Regulator of sex-limitation candidate 24 Rslcan24  
1458075\_at 2.47950 Dystonin Dst  
1458076\_at 1.14920 --- ---  
1458077\_at 1.25315 "Bromodomain adjacent to zinc finger domain, 2B" Baz2b  
1458078\_at 1.61777 chromodomain helicase DNA binding protein 9 Chd9  
1458079\_at 0.97944 ubiquitin specific peptidase 40 Usp40  
1458080\_at 0.89996 senataxin Setx  
1458081\_at 0.92951 "13 days embryo heart cDNA, RIKEN full-length enriched library, clone: D330025O06 product:unclassifiable, full insert sequence" ---  
1458082\_at 0.90523 Cd200 antigen Cd200  
1458083\_at 1.22096 RIKEN cDNA 4932438A13 gene 4932438A13Rik  
1458084\_at 0.90234 "Zinc finger, DHHC domain containing 17" Zdhhc17  
1458085\_at 0.97014 --- ---  
1458086\_at 1.06807 RIKEN cDNA 4732471D19 gene 4732471D19Rik  
1458087\_at 0.95526 SH3 and cysteine rich domain 3 Stac3  
1458088\_at 0.90931 Ubiquitin-associated protein 2 Ubap2  
1458089\_at 1.07687 FK506 binding protein 5 Fkbp5  
1458090\_at 1.04412 RIKEN cDNA 4930504E06 gene 4930504E06Rik  
1458091\_at 0.97883 Dipeptidylpeptidase 10 Dpp10  
1458092\_at 1.00111 "Adaptor-related protein complex 3, mu 1 subunit" Ap3m1  
1458093\_at 0.93049 5-methyltetrahydrofolate-homocysteine methyltransferase reductase Mtrr  
1458094\_at 1.15290 Zinc finger protein 407 Zfp407  
1458095\_at 0.82556 "GTL2, imprinted maternally expressed untranslated mRNA" Gtl2  
1458096\_at 1.04140 Nance-Horan syndrome (human) Nhs  
1458097\_at 3.22608 Cobl-like 1 Cobll1  
1458098\_at 1.03497 "Adult male medulla oblongata cDNA, RIKEN full-length enriched library, clone:6330559K07 product:unclassifiable, full insert sequence" ---  
1458099\_at 2.59060 --- ---  
1458100\_at 0.89373 expressed sequence C87482 C87482  
1458101\_at 0.94274 leucine rich repeat containing 56 Lrrc56  
1458102\_at 0.93849 Plexin A2 Plxna2  
1458103\_at 0.99210 nuclear receptor co-repressor 1 Ncor1  
1458104\_a\_at 0.89341 cDNA sequence BC038167 BC038167  
1458105\_at 0.88031 --- ---

|            |         |                                                                                                                                      |                         |  |
|------------|---------|--------------------------------------------------------------------------------------------------------------------------------------|-------------------------|--|
| 1458106_at | 1.07539 | ---                                                                                                                                  | ---                     |  |
| 1458107_at | 0.87401 | ---                                                                                                                                  | ---                     |  |
| 1458108_at | 1.10507 | Pentatricopeptide repeat domain 2                                                                                                    | Ptcd2                   |  |
| 1458109_at | 1.02253 | Hyaluronan and proteoglycan link protein 1                                                                                           | Hapln1                  |  |
| 1458110_at | 1.26362 | RIKEN cDNA D430030G11 gene                                                                                                           | D430030G11Rik           |  |
| 1458111_at | 1.44216 | RIKEN cDNA C530043G21 gene                                                                                                           | C530043G21Rik           |  |
| 1458112_at | 0.88970 | "adenosine deaminase, RNA-specific, B2"                                                                                              | Adarb2                  |  |
| 1458113_at | 1.05740 | RIKEN cDNA 9530019H20 gene                                                                                                           | 9530019H20Rik           |  |
| 1458114_at | 0.95738 | sterile alpha motif domain containing 12                                                                                             | Samd12                  |  |
| 1458115_at | 1.05537 | RIKEN cDNA 4930512H18 gene                                                                                                           | 4930512H18Rik           |  |
| 1458116_at | 0.98706 | RIKEN cDNA 9530079D04 gene                                                                                                           | 9530079D04Rik           |  |
| 1458117_at | 0.86739 | GTPase activating RANGAP domain-like 1                                                                                               | Garnl1                  |  |
| 1458118_at | 1.07766 | "DNA segment, Chr 2, ERATO Doi 391, expressed"                                                                                       | D2Ertd391e              |  |
| 1458119_at | 0.97310 | "solute carrier family 25, member 27"                                                                                                | Slc25a27                |  |
| 1458120_at | 0.86152 | cadherin 18 /// RIKEN cDNA B230220E17 gene                                                                                           | Cdh18 /// B230220E17Rik |  |
| 1458121_at | 1.04207 | RIKEN cDNA A430107O13 gene                                                                                                           | A430107O13Rik           |  |
| 1458122_at | 1.11814 | "7 days neonate cerebellum cDNA, RIKEN full-length enriched library, clone: A730016A03 product:unclassifiable, full insert sequence" | ---                     |  |
| 1458123_at | 1.00782 | RIKEN cDNA 9630002A11 gene                                                                                                           | 9630002A11Rik           |  |
| 1458124_at | 1.06999 | IQ motif containing GTPase activating protein 1                                                                                      | Iqgap1                  |  |
| 1458125_at | 1.26911 | Expressed sequence C80913                                                                                                            | C80913                  |  |
| 1458126_at | 1.38905 | RIKEN cDNA D030041H20 gene                                                                                                           | D030041H20Rik           |  |
| 1458127_at | 1.00893 | Cell adhesion molecule-related/down-regulated by oncogenes                                                                           | Cdon                    |  |
| 1458128_at | 1.04685 | RIKEN cDNA 1110028C15 gene                                                                                                           | 1110028C15Rik           |  |
| 1458129_at | 0.91494 | RAR-related orphan receptor alpha                                                                                                    | Rora                    |  |
| 1458130_at | 1.02940 | RIKEN cDNA 1110001A07 gene                                                                                                           | 1110001A07Rik           |  |
| 1458131_at | 0.93081 | ---                                                                                                                                  | ---                     |  |
| 1458132_at | 1.06006 | cyclin M2                                                                                                                            | Cnm2                    |  |
| 1458133_at | 0.94891 | ---                                                                                                                                  | ---                     |  |
| 1458134_at | 1.40716 | Glutathione transferase zeta 1 (maleylacetoacetate isomerase)                                                                        | Gstz1                   |  |
| 1458135_at | 1.31024 | RIKEN cDNA G630014P10 gene                                                                                                           | G630014P10Rik           |  |
| 1458136_at | 0.97665 | Musashi homolog 2 (Drosophila)                                                                                                       | Msi2                    |  |
| 1458137_at | 0.90720 | Transcribed locus                                                                                                                    | ---                     |  |
| 1458138_at | 0.94189 | Ring finger protein 190                                                                                                              | Rnf190                  |  |
| 1458139_at | 0.97974 | ---                                                                                                                                  | ---                     |  |
| 1458140_at | 1.02381 | slit homolog 2 (Drosophila)                                                                                                          | Slit2                   |  |
| 1458141_at | 0.95927 | ---                                                                                                                                  | ---                     |  |
| 1458142_at | 1.07928 | "zinc finger, DHHC domain containing 9"                                                                                              | Zdhhc9                  |  |
| 1458143_at | 0.98313 | "ADAM metallopeptidase with thrombospondin type 1 motif, 3"                                                                          | Adamts3                 |  |
| 1458144_at | 1.07219 | CDNA sequence BC031353                                                                                                               | BC031353                |  |
| 1458145_at | 1.21903 | RAR-related orphan receptor alpha                                                                                                    | Rora                    |  |
| 1458146_at | 0.86107 | RIKEN cDNA D030011O10 gene                                                                                                           | D030011O10Rik           |  |
| 1458147_at | 1.00664 | MAM domain containing 1                                                                                                              | Mamdc1                  |  |

|            |         |                                                                                                                                                     |                                   |
|------------|---------|-----------------------------------------------------------------------------------------------------------------------------------------------------|-----------------------------------|
| 1458148_at | 0.96020 | RIKEN cDNA D230007K08 gene                                                                                                                          | D230007K08Rik                     |
| 1458149_at | 1.08296 | ---                                                                                                                                                 | ---                               |
| 1458150_at | 0.98625 | RIKEN cDNA D030051N19 gene                                                                                                                          | D030051N19Rik                     |
| 1458151_at | 1.20692 | RIKEN cDNA 4833444G19 gene                                                                                                                          | 4833444G19Rik                     |
| 1458152_at | 1.01736 | "electron transferring flavoprotein, dehydrogenase"                                                                                                 | Etfdh                             |
| 1458153_at | 0.89157 | Peroxisomal biogenesis factor 14                                                                                                                    | Pex14                             |
| 1458154_at | 0.97851 | Transcribed locus                                                                                                                                   | ---                               |
| 1458155_at | 0.93046 | RAB GTPase activating protein 1-like                                                                                                                | Rabgap11                          |
| 1458156_at | 2.16126 | RIKEN cDNA E230012J19 gene                                                                                                                          | E230012J19Rik                     |
| 1458157_at | 1.10875 | NIMA (never in mitosis gene a)-related expressed kinase 8                                                                                           | Nek8                              |
| 1458158_at | 1.06810 | WD repeat domain 67                                                                                                                                 | Wdr67                             |
| 1458159_at | 1.78911 | "Guanine nucleotide binding protein, alpha q polypeptide"                                                                                           | Gnaq                              |
| 1458160_at | 0.93202 | "Adult male testis cDNA, RIKEN full-length enriched library, clone:4933400K21 product:unclassifiable, full insert sequence"                         | ---                               |
| 1458161_at | 1.65853 | KCNQ1 overlapping transcript 1                                                                                                                      | Kcnq1ot1                          |
| 1458162_at | 0.99033 | "Adult male hippocampus cDNA, RIKEN full-length enriched library, clone: C630034F03 product:unclassifiable, full insert sequence"                   | ---                               |
| 1458163_at | 1.02688 | cDNA sequence BC066028                                                                                                                              | BC066028                          |
| 1458164_at | 0.93653 | hypothetical LOC552913                                                                                                                              | LOC552913                         |
| 1458165_at | 0.99192 | importin 7                                                                                                                                          | Ipo7                              |
| 1458166_at | 1.12600 | PHD finger protein 21A                                                                                                                              | Phf21a                            |
| 1458167_at | 0.97375 | ---                                                                                                                                                 | ---                               |
| 1458168_at | 1.05626 | "Adult male adrenal gland cDNA, RIKEN full-length enriched library, clone:7330440N08 product:hypothetical protein, full insert sequence"            | ---                               |
| 1458169_at | 0.90271 | "gene model 700, (NCBI) /// similar to Motilin receptor (G-protein coupled receptor 38) /// similar to platelet endothelial aggregation receptor 1" | Gm700 /// LOC668482 /// LOC675947 |
| 1458170_at | 1.02586 | ---                                                                                                                                                 | ---                               |
| 1458171_at | 0.97592 | "solute carrier organic anion transporter family, member 2b1"                                                                                       | Slco2b1                           |
| 1458172_at | 1.16154 | "malic enzyme 2, NAD(+)-dependent, mitochondrial"                                                                                                   | Me2                               |
| 1458173_at | 1.07783 | "Centaurin, delta 1"                                                                                                                                | Centd1                            |
| 1458174_at | 0.97122 | coiled-coil domain containing 52                                                                                                                    | Ccdc52                            |
| 1458175_at | 0.83637 | "spondin 2, extracellular matrix protein"                                                                                                           | Spon2                             |
| 1458176_at | 1.48556 | Period homolog 3 (Drosophila)                                                                                                                       | Per3                              |
| 1458177_at | 0.99146 | emopamil binding protein-like                                                                                                                       | Ebpl                              |
| 1458178_at | 1.02804 | RIKEN cDNA 1700012H17 gene                                                                                                                          | 1700012H17Rik                     |
| 1458179_at | 1.42261 | ---                                                                                                                                                 | ---                               |
| 1458180_at | 1.29179 | ---                                                                                                                                                 | ---                               |
| 1458181_at | 1.05933 | RIKEN cDNA 9030624J02 gene                                                                                                                          | 9030624J02Rik                     |
| 1458182_at | 1.64195 | RNA binding motif protein 18                                                                                                                        | Rbm18                             |
| 1458183_at | 1.16462 | RIKEN cDNA 2810039B14 gene                                                                                                                          | 2810039B14Rik                     |
| 1458184_at | 0.98594 | RIKEN cDNA D030020J04 gene                                                                                                                          | D030020J04Rik                     |
| 1458185_at | 1.19309 | THAP domain containing 4                                                                                                                            | Thap4                             |

1458186\_at 1.00170 Transcribed locus ---  
1458187\_at 1.16047 zinc finger protein 142 Zfp142  
1458188\_at 0.89947 Dihydropyrimidinase-like 2 Dpysl2  
1458189\_at 0.95246 EMI domain containing 2 Emid2  
1458190\_at 0.99174 Rho GTPase activating protein 4 Arhgap4  
1458191\_at 0.81336 forkhead box P2 Foxp2  
1458192\_at 1.01301 RIKEN cDNA C130065N10 gene C130065N10Rik  
1458193\_at 0.96645 peripheral myelin protein 2 Pmp2  
1458194\_at 0.96959 --- ---  
1458195\_at 1.19205 vacuolar protein sorting 13 D (yeast) Vps13d  
1458196\_at 1.01974 Glucosamine-phosphate N-acetyltransferase 1 Gnpnat1  
1458197\_x\_at 0.91251 MAP kinase-activated protein kinase 5 /// a disintegrin and metallopeptidase  
domain 1a Mapkapk5 /// Adam1a  
1458198\_at 1.04518 expressed sequence C81508 C81508  
1458199\_at 1.34263 Activating signal cointegrator 1 complex subunit 2 Ascc2  
1458200\_at 1.54603 BTB (POZ) domain containing 14B Btbd14b  
1458201\_at 1.02102 --- ---  
1458202\_at 0.85751 RIKEN cDNA 6330500D04 gene 6330500D04Rik  
1458203\_at 1.25340 Spire homolog 1 (Drosophila) Spire1  
1458204\_at 1.00768 secreted acidic cysteine rich glycoprotein Sparc  
1458205\_at 1.10833 --- ---  
1458206\_at 0.98175 --- ---  
1458207\_at 1.00797 "Zinc finger, BED domain containing 3" Zbed3  
1458208\_s\_at 1.13186 --- ---  
1458209\_at 1.04587 Kinase non-catalytic C-lobe domain (KIND) containing 1 Kndc1  
1458210\_at 1.01686 RIKEN cDNA 9130404H23 gene 9130404H23Rik  
1458211\_at 0.96421 NIMA (never in mitosis gene a)-related expressed kinase 1 Nek1  
1458212\_at 1.02509 "Phosphodiesterase 4D, cAMP specific" Pde4d  
1458213\_at 1.10655 Nuclear factor of activated T-cells 5 Nfat5  
1458214\_at 0.91965 RIKEN cDNA A730012O14 gene A730012O14Rik  
1458215\_at 1.28256 "SET domain, bifurcated 1" Setdb1  
1458216\_at 1.03655 Transcribed locus ---  
1458217\_s\_at 1.08505 RIKEN cDNA 2210018M11 gene 2210018M11Rik  
1458218\_s\_at 1.02356 phosphodiesterase 7A Pde7a  
1458219\_at 0.89331 breast carcinoma amplified sequence 2 Bcas2  
1458220\_at 1.07364 deleted in liver cancer 1 Dlc1  
1458221\_at 1.02256 RIKEN cDNA G630014P10 gene G630014P10Rik  
1458222\_at 1.34940 Transcribed locus ---  
1458223\_at 0.82744 transformed mouse 3T3 cell double minute 4 /// similar to transformed mouse  
3T3 cell double minute 4 /// similar to transformed mouse 3T3 cell double minute 4 Mdm4 ///  
LOC546376 /// LOC630948  
1458224\_at 1.15136 Leucine rich repeat containing 2 Lrrc2  
1458225\_at 1.13997 FK506 binding protein 14 Fkbp14

1458226\_at 0.93260 "filamin, beta" Flnb  
 1458227\_at 0.98449 --- ---  
 1458228\_at 1.02055 Opioid binding protein/cell adhesion molecule-like Opcml  
 1458229\_at 0.99359 roundabout homolog 2 (Drosophila) Robo2  
 1458230\_at 0.98997 "Glutamate receptor, ionotropic, AMPA4 (alpha 4)" Gria4  
 1458231\_at 0.91562 "PREDICTED: Mus musculus similar to Zinc finger protein 195 (LOC625519), mRNA" ---  
 1458232\_at 0.97100 dickkopf homolog 1 (Xenopus laevis) Dkk1  
 1458233\_at 1.43252 RIKEN cDNA 9030227G01 gene 9030227G01Rik  
 1458234\_at 0.81666 RIKEN cDNA A730052K04 gene A730052K04Rik  
 1458235\_at 1.17955 A kinase (PRKA) anchor protein (gravin) 12 Akap12  
 1458236\_at 0.97959 "12 days embryo eyeball cDNA, RIKEN full-length enriched library, clone: D230015O18 product:hypothetical protein, full insert sequence" ---  
 1458237\_at 0.95554 --- ---  
 1458238\_at 1.06157 AT rich interactive domain 5B (Mrf1 like) Arid5b  
 1458239\_at 1.04744 --- ---  
 1458240\_at 1.08071 "Membrane associated guanylate kinase, WW and PDZ domain containing 1" Magi1  
 1458241\_at 1.14798 High mobility group AT-hook 2 Hmga2  
 1458242\_at 0.93452 Gephyrin Gphn  
 1458243\_at 1.00348 --- ---  
 1458244\_at 0.86477 transmembrane and coiled-coil domains 5 Tmco5  
 1458245\_at 1.01017 similar to sushi domain containing 1 LOC634731  
 1458246\_at 1.07279 --- ---  
 1458247\_s\_at 1.00167 dynactin 5 Dctn5  
 1458248\_at 0.84545 --- ---  
 1458249\_at 1.13996 --- ---  
 1458250\_at 1.17463 RIKEN cDNA 1200015N20 gene 1200015N20Rik  
 1458251\_at 0.96129 expressed sequence AU022166 AU022166  
 1458252\_at 1.04074 "Mus musculus, Similar to RIKEN cDNA B430319H21 gene, clone IMAGE:3991101, mRNA" ---  
 1458253\_at 0.88651 "Adult male bone cDNA, RIKEN full-length enriched library, clone:9830128M12 product:unclassifiable, full insert sequence" ---  
 1458254\_at 1.06321 RIKEN cDNA D330027H18 gene D330027H18Rik  
 1458255\_at 0.99846 WD repeat domain 33 Wdr33  
 1458256\_at 0.98729 RIKEN cDNA 5830446M03 gene 5830446M03Rik  
 1458257\_at 1.37697 --- ---  
 1458258\_at 0.98560 --- ---  
 1458259\_x\_at 1.00110 "COP9 (constitutive photomorphogenic) homolog, subunit 3 (Arabidopsis thaliana)" Cops3  
 1458260\_at 0.99624 Espin Espn  
 1458261\_at 1.23793 Casitas B-lineage lymphoma-like 1 Cbl1  
 1458262\_at 0.91132 Vexonuclease 3'-5' domain-like 1 Exd1

1458263\_at 1.39576 "CUG triplet repeat, RNA binding protein 2" Cugbp2  
1458264\_at 0.99319 RIKEN cDNA 4930412F12 gene 4930412F12Rik  
1458265\_at 0.98795 Kinesin 2 Kns2  
1458266\_at 1.00113 Mitotic arrest deficient 1-like 1 Mad111  
1458267\_at 1.01956 zinc finger protein 248 Zfp248  
1458268\_s\_at 0.71803 insulin-like growth factor binding protein 3 Igfbp3  
1458269\_at 0.82782 protocadherin 9 /// similar to protocadherin 9 isoform 1 precursor Pcdh9 ///  
LOC638275  
1458270\_at 0.99358 --- ---  
1458271\_at 1.13750 "12 days embryo spinal cord cDNA, RIKEN full-length enriched library, clone:  
C530003P15 product:unclassifiable, full insert sequence" ---  
1458272\_at 1.10576 Transcribed locus ---  
1458273\_at 0.96186 Transcribed locus ---  
1458274\_at 0.92665 zinc finger protein 69 Zfp69  
1458275\_at 1.06117 RIKEN cDNA 2310045A20 gene 2310045A20Rik  
1458276\_x\_at 1.12924 citron Cit  
1458277\_at 1.15299 Chemokine (C-C motif) ligand 25 Ccl25  
1458278\_at 0.84724 --- ---  
1458279\_at 1.23871 Forkhead box O3a Foxo3a  
1458280\_at 1.40912 Activating signal cointegrator 1 complex subunit 2 Ascc2  
1458281\_at 0.91748 Arylsulfatase B Arsb  
1458282\_at 1.45790 --- ---  
1458283\_at 0.95215 RIKEN cDNA 4931406P16 gene 4931406P16Rik  
1458284\_at 0.90645 polypyrimidine tract binding protein 1 Ptbp1  
1458285\_at 1.02966 "Glutamate receptor, ionotropic, AMPA1 (alpha 1)" Gria1  
1458286\_at 0.93694 RIKEN cDNA 0610007P14 gene 0610007P14Rik  
1458287\_at 0.83405 Transcribed locus ---  
1458288\_at 1.00227 RIKEN cDNA 4732475C15 gene 4732475C15Rik  
1458289\_at 1.06160 UDP-N-acetyl-alpha-D-galactosamine:polypeptide N-  
acetylgalactosaminyltransferase-like 4 Galntl4  
1458290\_at 1.90576 R3H domain 1 (binds single-stranded nucleic acids) R3hdm1  
1458291\_at 0.99874 Inhibin beta-A Inhba  
1458292\_at 1.18433 "proteasome (prosome, macropain) subunit, alpha type 1" Psma1  
1458293\_at 1.09617 RIKEN cDNA 5730403B10 gene 5730403B10Rik  
1458294\_at 1.14991 Transcribed locus ---  
1458295\_at 0.91375 cDNA sequence BC038331 BC038331  
1458296\_at 2.19604 Exostoses (multiple) 1 Ext1  
1458297\_s\_at 1.01709 macrophage receptor with collagenous structure Marco  
1458298\_at 1.01502 Ca<2+>dependent activator protein for secretion Cadps  
1458299\_s\_at 1.30663 "nuclear factor of kappa light polypeptide gene enhancer in B-cells inhibitor,  
epsilon" Nfkbie  
1458300\_at 0.98914 "aldo-keto reductase family 7, member A5 (aflatoxin aldehyde reductase)"  
Akr7a5

1458301\_x\_at 1.03780 Zinc finger protein 292 Zfp292  
1458302\_at 1.01447 Transcribed locus ---  
1458303\_at 1.08218 "gene model 96, (NCBI)" Gm96  
1458304\_at 0.98009 MAD homolog 2 (Drosophila) Smad2  
1458305\_at 0.94834 --- ---  
1458306\_at 0.99479 "phosphatidylinositol glycan anchor biosynthesis, class Z" Pigz  
1458307\_at 1.03320 RIKEN cDNA B230334C09 gene B230334C09Rik  
1458308\_at 2.16084 strawberry notch homolog (Drosophila) Stno  
1458309\_at 2.08241 Transcribed locus ---  
1458310\_at 0.88459 RIKEN cDNA A230056J06 gene A230056J06Rik  
1458311\_at 1.09351 ubiquitin specific peptidase 36 Usp36  
1458312\_at 0.94076 "Calcium channel, voltage-dependent, P/Q type, alpha 1A subunit" Cacna1a  
1458313\_at 0.87423 Cell division cycle 2-like 5 (cholinesterase-related cell division controller)  
Cdc215  
1458314\_at 0.98760 "Solute carrier family 1 (glial high affinity glutamate transporter), member 2"  
Slc1a2  
1458315\_at 1.00392 enhancer of polycomb homolog 1 (Drosophila) Epc1  
1458316\_at 1.05153 Transcribed locus ---  
1458317\_at 1.07703 Echinoderm microtubule associated protein like 1 Eml1  
1458318\_at 1.44423 RIKEN cDNA 3110047M12 gene 3110047M12Rik  
1458319\_at 0.89674 G protein-coupled receptor 177 Gpr177  
1458320\_at 1.07143 RIKEN cDNA 4932431H17 gene /// similar to RIKEN cDNA 4932431H17  
gene 4932431H17Rik /// LOC635623  
1458321\_at 0.99388 phosphatidylinositol 3-kinase catalytic delta polypeptide Pik3cd  
1458322\_x\_at 0.99233 RIKEN cDNA E230008N13 gene E230008N13Rik  
1458323\_at 0.96704 RIKEN cDNA 4930444A19 gene 4930444A19Rik  
1458324\_x\_at 1.07021 "16 days embryo head cDNA, RIKEN full-length enriched library, clone:  
C130051K14 product:unclassifiable, full insert sequence" ---  
1458325\_x\_at 1.15505 Bcl2 modifying factor Bmf  
1458326\_at 1.04051 polymerase (RNA) II (DNA directed) polypeptide E Polr2e  
1458327\_x\_at 0.99048 "solute carrier family 26 (sulfate transporter), member 1" Slc26a1  
1458328\_x\_at 0.97730 SH3-domain GRB2-like (endophilin) interacting protein 1 Sgip1  
1458329\_x\_at 1.05699 RIKEN cDNA 1110051B16 gene 1110051B16Rik  
1458330\_x\_at 0.87663 Cyclin M3 Cnm3  
1458331\_x\_at 0.95951 carboxylesterase 7 Ces7  
1458332\_x\_at 0.93917 SRY-box containing gene 4 Sox4  
1458333\_x\_at 0.93954 undifferentiated embryonic cell transcription factor 1 Utf1  
1458334\_at 1.00942 wingless-related MMTV integration site 7A Wnt7a  
1458335\_x\_at 1.52583 RIKEN cDNA 2900073H19 gene 2900073H19Rik  
1458336\_at 0.94998 RIKEN cDNA 2310035C23 gene 2310035C23Rik  
1458337\_at 1.15472 Transcription factor 12 Tcf12  
1458338\_x\_at 0.76140 "nuclear receptor subfamily 2, group C, member 1" Nr2c1  
1458339\_at 1.10253 cytidine and dCMP deaminase domain containing 1 Cdadc1



1458340\_at 0.93059 Transcribed locus ---  
 1458341\_x\_at 0.78689 --- ---  
 1458342\_at 1.03826 transmembrane protein 90a Tmem90a  
 1458343\_x\_at 1.02895 "mediator of RNA polymerase II transcription, subunit 6 homolog (yeast)"  
 Med6  
 1458344\_at 0.97953 N-acetylglucosamine-1-phosphodiester alpha-N-acetylglucosaminidase  
 Nagpa  
 1458345\_s\_at 0.99355 collectin sub-family member 11 Colec11  
 1458346\_x\_at 1.11874 "ATPase, Ca<sup>++</sup> transporting, plasma membrane 1" Atp2b1  
 1458347\_s\_at 0.98275 "transmembrane protease, serine 2" Tmprss2  
 1458348\_at 1.00012 Transcribed locus ---  
 1458349\_s\_at 1.02152 "10 days neonate skin cDNA, RIKEN full-length enriched library,  
 clone:4732488M12 product:unclassifiable, full insert sequence" ---  
 1458350\_at 0.91260 Optic atrophy 3 (human) Opa3  
 1458351\_s\_at 0.96620 "kelch-like 2, Mayven (Drosophila)" Klh2  
 1458352\_at 1.11212 RIKEN cDNA A830039H10 gene A830039H10Rik  
 1458353\_at 0.97063 RIKEN cDNA A230063L24 gene A230063L24Rik  
 1458354\_x\_at 1.04281 keratin 28 Krt28  
 1458355\_x\_at 0.95464 expressed sequence AI553587 AI553587  
 1458356\_at 0.92093 --- ---  
 1458357\_x\_at 0.92542 Prostate tumor over expressed gene 1 Ptov1  
 1458358\_at 1.10982 pantothenate kinase 2 (Hallervorden-Spatz syndrome) Pank2  
 1458359\_at 0.95244 Transcribed locus ---  
 1458360\_at 0.95608 "Sparc/osteonectin, cwcv and kazal-like domains proteoglycan 2" Spock2  
 1458361\_at 0.91617 "DNA cross-link repair 1C, PSO2 homolog (S. cerevisiae)" Dclre1c  
 1458362\_at 0.98876 RIKEN cDNA D730005E14 gene D730005E14Rik  
 1458363\_at 1.08666 "zinc finger, DHHC domain containing 17" Zdhhc17  
 1458364\_s\_at 0.96522 interferon alpha responsive gene Ifrg15  
 1458365\_at 0.86900 SCY1-like 1 binding protein 1 Scyl1bp1  
 1458366\_at 0.88309 Additional sex combs like 2 (Drosophila) Asxl2  
 1458367\_at 1.01535 "gene model 94, (NCBI)" Gm94  
 1458368\_at 0.99191 "myosin, heavy polypeptide 4, skeletal muscle" Myh4  
 1458369\_at 1.10729 RIKEN cDNA 2310050B05 gene 2310050B05Rik  
 1458370\_at 0.99359 BMP2 inducible kinase Bmp2k  
 1458371\_at 1.08503 RIKEN cDNA E130006N16 gene E130006N16Rik  
 1458372\_at 0.98326 transmembrane channel-like 8 Tmc8  
 1458373\_at 1.11948 RIKEN cDNA 5830483C08 gene 5830483C08Rik  
 1458374\_at 1.01295 expressed sequence C79407 C79407  
 1458375\_at 1.07757 RIKEN cDNA 6430524H05 gene 6430524H05Rik  
 1458376\_at 2.83702 RIKEN cDNA B930025B16 gene B930025B16Rik  
 1458377\_at 1.01678 "cofactor required for Sp1 transcriptional activation, subunit 7" Crsp7  
 1458378\_at 0.99234 "glutamate receptor ionotropic, NMDA3A" Grin3a  
 1458379\_at 0.97575 RIKEN cDNA 9330159F19 gene 9330159F19Rik

|              |               |                                                                     |                                                                       |
|--------------|---------------|---------------------------------------------------------------------|-----------------------------------------------------------------------|
| 1458380_at   | 0.85568       | additional sex combs like 1 (Drosophila)                            | Asxl1                                                                 |
| 1458381_at   | 0.77899       | chloride intracellular channel 5                                    | Clic5                                                                 |
| 1458382_a_at | 1.26951       | zinc fingers and homeoboxes protein 1                               | Zhx1                                                                  |
| 1458383_at   | 1.08420       | "Isocitrate dehydrogenase 2 (NADP+), mitochondrial"                 | Idh2                                                                  |
| 1458384_at   | 1.08472       | Transcribed locus                                                   | ---                                                                   |
| 1458385_at   | 1.38038       | heat shock protein 4 like                                           | Hspa4l                                                                |
| 1458386_at   | 1.02747       | RIKEN cDNA C030009J22 gene                                          | C030009J22Rik                                                         |
| 1458387_at   | 0.97519       | phosphatidylserine synthase 2                                       | Ptdss2                                                                |
| 1458388_at   | 0.99760       | "gene model 172, (NCBI)"                                            | Gm172                                                                 |
| 1458389_at   | 1.03226       | Kruppel-like factor 7 (ubiquitous)                                  | Klf7                                                                  |
| 1458390_at   | 1.01510       | anaphase promoting complex subunit 10                               | Anapc10                                                               |
| 1458391_at   | 1.03592       | ---                                                                 | ---                                                                   |
| 1458392_at   | 0.89729       | Expressed sequence C87414                                           | C87414                                                                |
| 1458393_at   | 1.03626       | serine racemase                                                     | Srr                                                                   |
| 1458394_at   | 1.02875       | "solute carrier family 6 (neurotransmitter transporter), member 17" | Slc6a17                                                               |
| 1458395_at   | 0.85683       | hypothetical protein B930054O08                                     | B930054O08                                                            |
| 1458396_at   | 0.91231       | "purinergic receptor P2X, ligand-gated ion channel, 3"              | P2rx3                                                                 |
| 1458397_at   | 0.97198       | hypothetical LOC622208                                              | LOC622208                                                             |
| 1458398_at   | 0.98593       | RIKEN cDNA 1700027F06 gene                                          | 1700027F06Rik                                                         |
| 1458399_at   | 0.98930       | leucine rich repeat containing 3                                    | Lrrc3                                                                 |
| 1458400_at   | 0.95852       | RIKEN cDNA 9630050P21 gene                                          | 9630050P21Rik                                                         |
| 1458401_at   | 1.05365       | RIKEN cDNA 4932438A13 gene                                          | /// similar to CG15133-PA                                             |
| CG15133-PA   | 4932438A13Rik | /// LOC671298                                                       | /// LOC676099                                                         |
| 1458402_at   | 0.91817       | 6-pyruvoyl-tetrahydropterin synthase                                | Pts                                                                   |
| 1458403_at   | 0.98598       | TRAF2 and NCK interacting kinase                                    | /// similar to [Segment 1 of 2] Traf2 and NCK-interacting kinase Tnik |
| 1458404_at   | 0.95803       | NADH dehydrogenase (ubiquinone) 1 beta subcomplex 8                 | Ndufb8                                                                |
| 1458405_at   | 1.10646       | hypothetical protein B430201F14                                     | B430201F14                                                            |
| 1458406_at   | 0.94479       | Expressed sequence AI429294                                         | AI429294                                                              |
| 1458407_s_at | 1.10497       | Expressed sequence AI429294                                         | AI429294                                                              |
| 1458408_at   | 0.96813       | sterile alpha motif domain containing 8                             | Samd8                                                                 |
| 1458409_at   | 0.83616       | expressed sequence C86595                                           | C86595                                                                |
| 1458410_at   | 1.05719       | GTPase activating RANGAP domain-like 1                              | Garnl1                                                                |
| 1458411_at   | 1.03266       | kinase non-catalytic C-lobe domain (KIND) containing 1              | Kndc1                                                                 |
| 1458412_at   | 0.83349       | zinc finger protein 78                                              | Zfp78                                                                 |
| 1458413_at   | 1.02312       | F-box and WD-40 domain protein 8                                    | Fbxw8                                                                 |
| 1458414_at   | 1.38916       | "DNA segment, Chr 2, ERATO Doi 93, expressed"                       | D2Ertd93e                                                             |
| 1458415_at   | 0.90581       | "C-type lectin domain family 2, member e"                           | Clec2e                                                                |
| 1458416_at   | 0.91553       | RIKEN cDNA A330048O09 gene                                          | A330048O09Rik                                                         |
| 1458417_at   | 0.95233       | jumonji domain containing 1B                                        | Jmjd1b                                                                |
| 1458418_at   | 1.14303       | "Mus musculus, clone IMAGE:5368497, mRNA"                           | ---                                                                   |
| 1458419_at   | 1.00991       | RIKEN cDNA E130215H24 gene                                          | E130215H24Rik                                                         |
| 1458420_at   | 0.75695       | RIKEN cDNA 9430057O19 gene                                          | 9430057O19Rik                                                         |

1458421\_at 0.99643 "potassium voltage-gated channel, subfamily Q, member 3" Kcnq3  
1458422\_at 0.98581 RIKEN cDNA D730002M21 gene D730002M21Rik  
1458423\_at 1.05940 LUC7-like 2 (*S. cerevisiae*) Luc712  
1458424\_at 0.91709 Fatty acid 2-hydroxylase Fa2h  
1458425\_at 0.88320 "16 days neonate thymus cDNA, RIKEN full-length enriched library, clone:  
A130088J11 product:unclassifiable, full insert sequence" ---  
1458426\_at 1.07484 Kinesin family member 1B Kif1b  
1458427\_at 1.10634 BRCA1 interacting protein C-terminal helicase 1 Brip1  
1458428\_at 0.95035 "potassium channel, subfamily T, member 1" Kcnt1  
1458429\_at 0.97950 Rho GTPase activating protein 30 Arhgap30  
1458430\_at 1.23790 expressed sequence C87436 C87436  
1458431\_at 0.89383 "eukaryotic translation initiation factor 4, gamma 2" Eif4g2  
1458432\_at 1.66061 Non-catalytic region of tyrosine kinase adaptor protein 2 Nck2  
1458433\_at 0.89825 "RASD family, member 2" Rasd2  
1458434\_at 1.04448 RIKEN cDNA A730009L09 gene A730009L09Rik  
1458435\_at 0.99776 RIKEN cDNA 2010000I03 gene 2010000I03Rik  
1458436\_at 1.01695 AU RNA binding protein/enoyl-coenzyme A hydratase Auh  
1458437\_at 0.95418 Transcribed locus ---  
1458438\_at 0.83756 RIKEN cDNA 4933415L06 gene 4933415L06Rik  
1458439\_a\_at 1.04689 RIKEN cDNA 2310047C04 gene 2310047C04Rik  
1458440\_at 1.14222 spectrin domain with coiled-coils 1 Specc1  
1458441\_at 1.12268 "solute carrier family 6 (neurotransmitter transporter), member 17" Slc6a17  
1458442\_at 1.00826 expressed sequence AI132709 AI132709  
1458443\_at 0.97387 CREB regulated transcription coactivator 1 Crtc1  
1458444\_at 0.92987 Expressed sequence AI195381 AI195381  
1458445\_at 0.93217 RIKEN cDNA 6530409C15 gene 6530409C15Rik  
1458446\_at 0.94291 RIKEN cDNA 3222401L13 gene 3222401L13Rik  
1458447\_at 0.86248 centromere protein F Cenpf  
1458448\_at 0.92426 expressed sequence AA408296 AA408296  
1458449\_at 1.12184 F-box and leucine-rich repeat protein 11 Fbxl11  
1458450\_at 2.07191 zinc finger RNA binding protein Zfr  
1458451\_at 1.07449 "Sno, strawberry notch homolog 1 (*Drosophila*)" Sbnol  
1458452\_at 1.87046 ankyrin repeat domain 11 Ankrd11  
1458453\_at 1.11506 LIM domain only 7 Lmo7  
1458454\_at 0.88369 Transcribed locus ---  
1458455\_at 0.91848 actin-binding Rho activating protein Abra  
1458456\_x\_at 1.06163 RIKEN cDNA 6430571L13 gene 6430571L13Rik  
1458457\_at 0.91113 --- ---  
1458458\_at 0.98760 schlafen 5 Slfn5  
1458459\_a\_at 0.89309 RIKEN cDNA E230029C05 gene /// expressed sequence AI452102 ///  
hypothetical protein LOC671286 E230029C05Rik /// AI452102 /// LOC671286  
1458460\_at 1.19852 Stromal interaction molecule 1 Stim1  
1458461\_at 1.03959 RIKEN cDNA E330021D16 gene E330021D16Rik

1458462\_at 1.03393 Rho GTPase activating protein 30 Arhgap30  
1458463\_at 0.96734 --- ---  
1458464\_at 1.07443 "HECT, C2 and WW domain containing E3 ubiquitin protein ligase 2"  
Hecw2  
1458465\_at 1.10774 PAN3 polyA specific ribonuclease subunit homolog (S. cerevisiae) Pan3  
1458466\_at 0.98977 protective protein for beta-galactosidase Ppgb  
1458467\_at 0.88556 RIKEN cDNA 1110032D16 gene 1110032D16Rik  
1458468\_at 1.11884 Coenzyme Q10 homolog A (yeast) Coq10a  
1458469\_at 1.08441 Casitas B-lineage lymphoma b Cblb  
1458470\_at 0.95797 --- ---  
1458471\_at 1.05471 WW domain containing adaptor with coiled-coil Wac  
1458472\_at 1.01330 RIKEN cDNA 4932417H02 gene 4932417H02Rik  
1458473\_at 1.05304 "POU domain, class 6, transcription factor 2" Pou6f2  
1458474\_at 1.20620 --- ---  
1458475\_at 1.13177 "Bruno-like 4, RNA binding protein (Drosophila)" Brunol4  
1458476\_at 1.10565 "eukaryotic translation initiation factor 2C, 3" Eif2c3  
1458477\_at 1.08877 "3 days neonate thymus cDNA, RIKEN full-length enriched library, clone:  
A630098N09 product:unclassifiable, full insert sequence" ---  
1458478\_at 0.85900 RIKEN cDNA 9230110F11 gene 9230110F11Rik  
1458479\_at 1.16296 SMC2 structural maintenance of chromosomes 2-like 1 (yeast) Smc2l1  
1458480\_at 1.17388 topoisomerase (DNA) II beta binding protein Topbp1  
1458481\_at 0.90567 "gene model 614, (NCBI)" Gm614  
1458482\_at 0.98681 TNNI3 interacting kinase Tnni3k  
1458483\_at 1.06105 RIKEN cDNA A330102I10 gene A330102I10Rik  
1458484\_at 1.05223 RIKEN cDNA A730020M07 gene A730020M07Rik  
1458485\_at 0.93468 F-box and leucine-rich repeat protein 7 Fbxl7  
1458486\_at 1.27819 --- ---  
1458487\_at 0.92565 Kruppel-like factor 3 (basic) /// RIKEN cDNA C230096K16 gene Klf3 ///  
C230096K16Rik  
1458488\_at 0.91611 doublecortin and CaM kinase-like 2 Dcamkl2  
1458489\_at 1.38911 Transcribed locus ---  
1458490\_at 0.98673 RIKEN cDNA 9230116N13 gene 9230116N13Rik  
1458491\_at 0.84696 RIKEN cDNA 4930422I07 gene 4930422I07Rik  
1458492\_x\_at 0.93761 neurotrimin Hnt  
1458493\_a\_at 1.08550 --- ---  
1458494\_at 0.91849 Transcribed locus ---  
1458495\_at 0.93242 "Protein phosphatase 3, catalytic subunit, alpha isoform" Ppp3ca  
1458496\_at 1.10458 Cytochrome b-561 Cyb561  
1458497\_at 2.47012 Cysteine rich transmembrane BMP regulator 1 (chordin like) Crim1  
1458498\_at 1.01257 --- ---  
1458499\_at 0.97679 phosphodiesterase 10A Pde10a  
1458500\_at 1.01288 expressed sequence AU021034 AU021034  
1458501\_at 0.98817 "vesicle-associated membrane protein, associated protein B and C" Vapb

|            |         |                                                                                                                                   |               |  |
|------------|---------|-----------------------------------------------------------------------------------------------------------------------------------|---------------|--|
| 1458502_at | 0.91525 | Kinectin 1                                                                                                                        | Ktn1          |  |
| 1458503_at | 1.02131 | ---                                                                                                                               | ---           |  |
| 1458504_at | 0.94044 | zinc finger CCCH type containing 12D                                                                                              | Zc3h12d       |  |
| 1458505_at | 0.86927 | hypothetical LOC552901                                                                                                            | LOC552901     |  |
| 1458506_at | 1.05159 | "gene model 1582, (NCBI)"                                                                                                         | Gm1582        |  |
| 1458507_at | 1.26080 | RIKEN cDNA 2810055G22 gene                                                                                                        | 2810055G22Rik |  |
| 1458508_at | 2.75334 | matrin 3                                                                                                                          | Matr3         |  |
| 1458509_at | 1.26042 | Meiotic recombination 11 homolog A (S. cerevisiae)                                                                                | Mre11a        |  |
| 1458510_at | 0.90517 | expressed sequence AU019823                                                                                                       | AU019823      |  |
| 1458511_at | 0.97957 | RIKEN cDNA 2410025L10 gene                                                                                                        | 2410025L10Rik |  |
| 1458512_at | 1.28423 | "transducin-like enhancer of split 3, homolog of Drosophila E(spl)"                                                               | Tle3          |  |
| 1458513_at | 1.02949 | mitogen activated protein kinase 10                                                                                               | Mapk10        |  |
| 1458514_at | 0.98998 | expressed sequence AA536887                                                                                                       | AA536887      |  |
| 1458515_at | 0.92968 | zinc finger protein 128                                                                                                           | Zfp128        |  |
| 1458516_at | 1.18033 | NCK associated protein 1 like                                                                                                     | Nckap11       |  |
| 1458517_at | 0.94003 | "Aldo-keto reductase family 1, member E1"                                                                                         | Akr1e1        |  |
| 1458518_at | 0.94508 | cytoplasmic polyadenylation element binding protein 2                                                                             | Cpeb2         |  |
| 1458519_at | 0.98077 | "0 day neonate head cDNA, RIKEN full-length enriched library, clone:4833418G05 product:unclassifiable, full insert sequence"      | ---           |  |
| 1458520_at | 1.04665 | Homeodomain interacting protein kinase 2                                                                                          | Hipk2         |  |
| 1458521_at | 0.93170 | Jumonji domain containing 1C                                                                                                      | Jmjd1c        |  |
| 1458522_at | 0.98246 | ---                                                                                                                               | ---           |  |
| 1458523_at | 1.04118 | "zinc finger, matrin-like"                                                                                                        | Zfml          |  |
| 1458524_at | 1.19476 | fibronectin type III domain containing 3a                                                                                         | Fndc3a        |  |
| 1458525_at | 1.98164 | Amyloid beta (A4) precursor protein                                                                                               | App           |  |
| 1458526_at | 1.42116 | ---                                                                                                                               | ---           |  |
| 1458527_at | 0.92723 | RIKEN cDNA 2610005L07 gene                                                                                                        | 2610005L07Rik |  |
| 1458528_at | 0.99132 | RIKEN cDNA C330002I19 gene                                                                                                        | C330002I19Rik |  |
| 1458529_at | 0.99684 | hypothetical protein A930010C09                                                                                                   | LOC215714     |  |
| 1458530_at | 1.06991 | Zinc finger protein 532                                                                                                           | Zfp532        |  |
| 1458531_at | 0.90991 | "DNA segment, Chr 6, ERATO Doi 588, expressed"                                                                                    | D6Ertd588e    |  |
| 1458532_at | 1.05469 | 5-methyltetrahydrofolate-homocysteine methyltransferase                                                                           | Mtr           |  |
| 1458533_at | 0.97299 | RIKEN cDNA 9330169L03 gene                                                                                                        | 9330169L03Rik |  |
| 1458534_at | 0.93269 | "DNA segment, Chr 13, Brigham & Women's Genetics 1146 expressed"                                                                  | D13Bwg1146e   |  |
| 1458535_at | 1.39309 | "Adult male spinal cord cDNA, RIKEN full-length enriched library, clone: A330040D20 product:unclassifiable, full insert sequence" | ---           |  |
| 1458536_at | 0.93321 | Cyclin I                                                                                                                          | Ccni          |  |
| 1458537_at | 0.99282 | ---                                                                                                                               | ---           |  |
| 1458538_at | 1.13656 | "Sirtuin 1 ((silent mating type information regulation 2, homolog) 1 (S. cerevisiae)"                                             | Sirt1         |  |
| 1458539_at | 0.92713 | R3H domain 1 (binds single-stranded nucleic acids)                                                                                | R3hdm1        |  |
| 1458540_at | 1.08098 | Transcribed locus                                                                                                                 | ---           |  |

|            |         |                                                                     |               |  |
|------------|---------|---------------------------------------------------------------------|---------------|--|
| 1458541_at | 0.89894 | dynactin 4                                                          | Dctn4         |  |
| 1458542_at | 1.22186 | Musashi homolog 2 (Drosophila)                                      | Msi2          |  |
| 1458543_at | 0.85323 | ---                                                                 | ---           |  |
| 1458544_at | 1.05281 | cDNA sequence BC059841                                              | BC059841      |  |
| 1458545_at | 1.11457 | Transmembrane protein 57                                            | Tmem57        |  |
| 1458546_at | 1.01154 | "DNA segment, Chr 18, ERATO Doi 653, expressed"                     | D18Ertd653e   |  |
| 1458547_at | 0.89416 | Transcribed locus                                                   | ---           |  |
| 1458548_at | 1.02301 | Transcribed locus                                                   | ---           |  |
| 1458549_at | 1.06847 | LOC436015                                                           | LOC436015     |  |
| 1458550_at | 1.50981 | myosin ID                                                           | Myo1d         |  |
| 1458551_at | 1.05927 | Myocyte enhancer factor 2C                                          | Mef2c         |  |
| 1458552_at | 0.81505 | RIKEN cDNA D430050E20 gene                                          | D430050E20Rik |  |
| 1458553_at | 0.94372 | "plasminogen activator, tissue"                                     | Plat          |  |
| 1458554_at | 1.04515 | RIKEN cDNA 9330169B04 gene                                          | 9330169B04Rik |  |
| 1458555_at | 1.02059 | ---                                                                 | ---           |  |
| 1458556_at | 1.04419 | Trinucleotide repeat containing 6C                                  | Tnrc6c        |  |
| 1458557_at | 1.02440 | breast carcinoma amplified sequence 3                               | Bcas3         |  |
| 1458558_at | 0.98108 | ---                                                                 | ---           |  |
| 1458559_at | 0.92566 | RIKEN cDNA A730028G07 gene                                          | A730028G07Rik |  |
| 1458560_at | 1.02105 | "asp (abnormal spindle)-like, microcephaly associated (Drosophila)" | Aspm          |  |
| 1458561_at | 1.00468 | neuralized-like homolog (Drosophila)                                | Neurl         |  |
| 1458562_at | 1.17108 | ---                                                                 | ---           |  |
| 1458563_at | 0.96849 | zinc finger protein 668                                             | Zfp668        |  |
| 1458564_at | 0.97483 | ---                                                                 | ---           |  |
| 1458565_at | 1.10754 | ---                                                                 | ---           |  |
| 1458566_at | 1.17394 | G patch domain containing 2                                         | Gpatc2        |  |
| 1458567_at | 1.11830 | RIKEN cDNA D130017N08 gene                                          | D130017N08Rik |  |
| 1458568_at | 0.85132 | Tumor suppressor candidate 3                                        | Tusc3         |  |
| 1458569_at | 1.02620 | elongation factor RNA polymerase II 2                               | Ell2          |  |
| 1458570_at | 0.93584 | "Alveolar soft part sarcoma chromosome region, candidate 1 (human)" | Aspscr1       |  |
| 1458571_at | 0.91072 | RIKEN cDNA D430047D06 gene                                          | D430047D06Rik |  |
| 1458572_at | 0.85064 | chromatin modifying protein 5                                       | Chmp5         |  |
| 1458573_at | 0.94761 | Transcribed locus                                                   | ---           |  |
| 1458574_at | 1.23257 | E2F transcription factor 2                                          | E2f2          |  |
| 1458575_at | 1.27937 | SET binding protein 1                                               | Setbp1        |  |
| 1458576_at | 1.26953 | N-acetyltransferase 11                                              | Nat11         |  |
| 1458577_at | 0.88305 | ---                                                                 | ---           |  |
| 1458578_at | 3.10036 | "RNA binding motif, single stranded interacting protein 1"          | Rbms1         |  |
| 1458579_at | 1.02610 | ---                                                                 | ---           |  |
| 1458580_at | 1.05468 | Transcribed locus                                                   | ---           |  |
| 1458581_at | 1.09612 | hypothetical LOC553093                                              | LOC553093     |  |
| 1458582_at | 1.17448 | expressed sequence AI461788                                         | AI461788      |  |

|            |         |                                                                                                                                     |               |
|------------|---------|-------------------------------------------------------------------------------------------------------------------------------------|---------------|
| 1458583_at | 1.08540 | RIKEN cDNA 1700123O12 gene                                                                                                          | 1700123O12Rik |
| 1458584_at | 1.02247 | RIKEN cDNA 4832406H04 gene                                                                                                          | 4832406H04Rik |
| 1458585_at | 0.69560 | Transcribed locus                                                                                                                   | ---           |
| 1458586_at | 2.01328 | ---                                                                                                                                 | ---           |
| 1458587_at | 0.96237 | RIKEN cDNA 2310047D07 gene                                                                                                          | 2310047D07Rik |
| 1458588_at | 1.93066 | Schwannomin interacting protein 1                                                                                                   | Schip1        |
| 1458589_at | 1.11649 | ---                                                                                                                                 | ---           |
| 1458590_at | 1.13336 | Integrator complex subunit 7                                                                                                        | Ints7         |
| 1458591_at | 0.92860 | RAS and EF hand domain containing                                                                                                   | Rasef         |
| 1458592_at | 0.97853 | Autism susceptibility candidate 2                                                                                                   | Auts2         |
| 1458593_at | 0.94969 | Fibrillin 1                                                                                                                         | Fbn1          |
| 1458594_at | 0.85731 | SNF2 histone linker PHD RING helicase                                                                                               | Shprh         |
| 1458595_at | 1.06298 | PDZ domain containing 6                                                                                                             | Pdzd6         |
| 1458596_at | 0.85733 | dynactin 4                                                                                                                          | Dctn4         |
| 1458597_at | 1.10775 | Transcribed locus                                                                                                                   | ---           |
| 1458598_at | 1.08738 | paternally expressed 13                                                                                                             | Peg13         |
| 1458599_at | 1.01673 | ---                                                                                                                                 | ---           |
| 1458600_at | 1.02566 | Transcribed locus                                                                                                                   | ---           |
| 1458601_at | 1.23742 | RIKEN cDNA 8030447M02 gene                                                                                                          | 8030447M02Rik |
| 1458602_at | 0.78825 | bobby sox homolog (Drosophila)                                                                                                      | Bbx           |
| 1458603_at | 1.38103 | ---                                                                                                                                 | ---           |
| 1458604_at | 1.57003 | Rho/rac guanine nucleotide exchange factor (GEF) 18                                                                                 | Arhgef18      |
| 1458605_at | 1.09434 | ADP-ribosylation factor-like 15                                                                                                     | Arl15         |
| 1458606_at | 0.96330 | ---                                                                                                                                 | ---           |
| 1458607_at | 0.97042 | "Transforming growth factor, beta receptor II"                                                                                      | Tgfbr2        |
| 1458608_at | 0.96174 | Protein-tyrosine sulfotransferase 2                                                                                                 | Tpst2         |
| 1458609_at | 0.98071 | "Adult male bone cDNA, RIKEN full-length enriched library, clone:9830162N06 product:unclassifiable, full insert sequence"           | ---           |
| 1458610_at | 0.94181 | ---                                                                                                                                 | ---           |
| 1458611_at | 1.01798 | Transcribed locus                                                                                                                   | ---           |
| 1458612_at | 0.94619 | RIKEN cDNA A930006A01 gene                                                                                                          | A930006A01Rik |
| 1458613_at | 1.10313 | arrestin domain containing 1                                                                                                        | Arrdc1        |
| 1458614_at | 0.90758 | DCP1 decapping enzyme homolog b (S. cerevisiae)                                                                                     | Dcp1b         |
| 1458615_at | 1.07780 | DEP domain containing 5                                                                                                             | Depdc5        |
| 1458616_at | 1.25174 | "UDP-Gal:betaGlcNAc beta 1,4- galactosyltransferase, polypeptide 1"                                                                 | B4galt1       |
| 1458617_at | 1.48970 | protein kinase C binding protein 1                                                                                                  | Prkcbp1       |
| 1458618_at | 1.45981 | Iron responsive element binding protein 2                                                                                           | Ireb2         |
| 1458619_at | 0.88046 | "Transcribed locus, moderately similar to XP_576460.1 PREDICTED: similar to hypothetical protein PB402898.00.0 [Rattus norvegicus]" | ---           |
| 1458620_at | 0.97358 | similar to ubiquitin A-52 residue ribosomal protein fusion product 1                                                                | LOC332993     |
| 1458621_at | 0.93271 | WD repeat domain 78                                                                                                                 | Wdr78         |

1458622\_at 0.99133 "neurotrophic tyrosine kinase, receptor, type 2" Ntrk2  
1458623\_at 1.06414 Transcribed locus ---  
1458624\_at 1.05037 similar to RNA binding motif protein 24 /// similar to RNA binding motif  
protein 24 LOC380843 /// LOC666794  
1458625\_at 1.00471 "10 days neonate cortex cDNA, RIKEN full-length enriched library, clone:  
A830014C22 product:unclassifiable, full insert sequence" ---  
1458626\_at 0.95482 "nitric oxide synthase 1, neuronal" Nos1  
1458627\_at 1.08202 "9 days embryo whole body cDNA, RIKEN full-length enriched library, clone:  
D030053I05 product:unclassifiable, full insert sequence" ---  
1458628\_at 1.04812 LIM motif-containing protein kinase 2 Limk2  
1458629\_at 0.97254 --- ---  
1458630\_at 1.00787 Vav 3 oncogene Vav3  
1458631\_at 0.92612 RIKEN cDNA 4921533L14 gene 4921533L14Rik  
1458632\_at 1.00577 Dihydropyrimidinase-like 2 Dpysl2  
1458633\_at 1.06582 --- ---  
1458634\_at 0.96801 "CD47 antigen (Rh-related antigen, integrin-associated signal transducer)"  
Cd47  
1458635\_at 0.88906 RIKEN cDNA 4832428D23 gene 4832428D23Rik  
1458636\_at 1.12013 RIKEN cDNA 2610206B13 gene 2610206B13Rik  
1458637\_x\_at 1.23377 Ubiquitin protein ligase E3C Ube3c  
1458638\_at 0.90557 Metadherin Mtdh  
1458639\_at 1.14868 Formin binding protein 1 Fnbp1  
1458640\_at 0.95656 "6 days neonate skin cDNA, RIKEN full-length enriched library, clone:  
A030007I19 product:hypothetical protein, full insert sequence" ---  
1458641\_at 1.07371 Braf transforming gene Braf  
1458642\_at 1.01254 killer cell lectin-like receptor family E member 1 Klre1  
1458643\_at 0.91690 deltex 1 homolog (Drosophila) Dtx1  
1458644\_at 0.88848 "expressed sequence AI661708 /// gene model 150, (NCBI)" AI661708 ///  
Gm150  
1458645\_at 1.01457 Transcribed locus ---  
1458646\_at 1.14964 MMS19 (MET18 S. cerevisiae)-like Mms19l  
1458647\_at 1.01400 RIKEN cDNA 6430553K19 gene 6430553K19Rik  
1458648\_at 3.08241 expressed sequence AU042950 AU042950  
1458649\_at 0.96101 expressed sequence AI662245 AI662245  
1458650\_at 0.96817 --- ---  
1458651\_at 1.05929 Mitogen activated protein kinase kinase kinase 10 Map3k10  
1458652\_at 0.96550 "CD8 antigen, beta chain 1" Cd8b1  
1458653\_at 1.04428 Pannexin 1 Panx1  
1458654\_at 0.97723 Transcribed locus ---  
1458655\_at 1.35520 WW domain containing transcription regulator 1 Wwtr1  
1458656\_at 0.95345 expressed sequence AW050198 AW050198  
1458657\_at 1.08830 Anthrax toxin receptor 1 Antxr1  
1458658\_at 0.92083 --- ---



1458659\_at 1.06727 placenta specific 9 Plac9  
1458660\_at 0.89604 expressed sequence AI414330 AI414330  
1458661\_at 1.63594 Mortality factor 4 like 1 Morf411  
1458662\_at 0.77229 dishevelled associated activator of morphogenesis 1 Daam1  
1458663\_at 1.99685 Like-glycosyltransferase Large  
1458664\_at 1.19251 Transcribed locus ---  
1458665\_at 1.15369 Chloride intracellular channel 1 Clic1  
1458666\_at 0.99120 "DNA segment, Chr 2, ERATO Doi 391, expressed" D2Ertd391e  
1458667\_at 0.82453 RIKEN cDNA 4930519N13 gene 4930519N13Rik  
1458668\_at 0.99408 Tumor protein D52 Tpd52  
1458669\_at 0.97119 Transcribed locus ---  
1458670\_at 0.84048 "Adenosine deaminase, RNA-specific, B2" Adarb2  
1458671\_at 0.94799 hypothetical protein LOC669460 LOC669460  
1458672\_at 0.97024 T-complex-associated testis expressed 2 Tcte2  
1458673\_at 0.91123 RIKEN cDNA 1700093J21 gene 1700093J21Rik  
1458674\_at 1.01794 Protein kinase N1 Pkn1  
1458675\_at 0.85198 --- ---  
1458676\_at 0.99834 natural killer tumor recognition sequence Nktr  
1458677\_at 0.87157 ectonucleoside triphosphate diphosphohydrolase 5 Entpd5  
1458678\_at 0.97253 "NADH dehydrogenase (ubiquinone) 1, alpha/beta subcomplex, 1" Ndufab1  
1458679\_a\_at 1.04322 TatD DNase domain containing 1 Tatdn1  
1458680\_at 1.02853 Hephaestin-like 1 Heph11  
1458681\_at 0.96852 Transmembrane 9 superfamily member 3 Tm9sf3  
1458682\_at 0.97440 RIKEN cDNA D130059P03 gene D130059P03Rik  
1458683\_at 0.92617 signal-regulatory protein beta 1 /// similar to SIRP beta 1 isoform 1 Sirpb1 ///  
LOC673172  
1458684\_at 1.18841 "synovial sarcoma translocation, Chromosome 18" Ss18  
1458685\_at 0.91316 GTPase activating RANGAP domain-like 1 Garn11  
1458686\_at 1.05864 Gametogenetin binding protein 2 Ggnbp2  
1458687\_at 0.88926 hypothetical protein LOC668172 /// hypothetical protein LOC672498 ///  
hypothetical protein LOC677134 LOC668172 /// LOC672498 /// LOC677134  
1458688\_at 1.17326 Rho GTPase activating protein 28 Arhgap28  
1458689\_at 1.15283 Autophagy-related 10 (yeast) Atg10  
1458690\_at 1.64455 membrane-associated ring finger (C3HC4) 7 7-Mar  
1458691\_at 1.01430 Synaptopodin 2-like Synpo2l  
1458692\_at 1.09302 Translocase of outer mitochondrial membrane 20 homolog (yeast) Tomm20  
1458693\_at 1.04054 "Sodium channel, voltage-gated, type VIII, alpha" Scn8a  
1458694\_at 1.00485 expressed sequence AI789011 AI789011  
1458695\_at 0.94147 Zinc finger and BTB domain containing 10 Zbtb10  
1458696\_at 0.87831 ARP1 actin-related protein 1 homolog A (yeast) Actr1a  
1458697\_at 0.97687 Transcribed locus ---  
1458698\_at 0.96799 CDNA sequence AB041803 AB041803  
1458699\_at 1.19345 CCR4 carbon catabolite repression 4-like (*S. cerevisiae*) Ccrn4l

|              |         |                                                                                                                 |               |
|--------------|---------|-----------------------------------------------------------------------------------------------------------------|---------------|
| 1458700_at   | 1.69493 | "Leucine rich repeat containing 8 family, member C"                                                             | Lrrc8c        |
| 1458701_at   | 1.04491 | preimplantation protein 4                                                                                       | Prei4         |
| 1458702_at   | 1.07929 | RIKEN cDNA 2610316D01 gene                                                                                      | 2610316D01Rik |
| 1458703_at   | 2.15432 | ---                                                                                                             | ---           |
| 1458704_at   | 0.96854 | "Transcribed locus, moderately similar to NP_663461.2 membrane-associated ring finger (C3HC4) 2 [Mus musculus]" | ---           |
| 1458705_at   | 1.03325 | RIKEN cDNA 1700031C06 gene                                                                                      | 1700031C06Rik |
| 1458706_at   | 1.16719 | RIKEN cDNA 2610035D17 gene                                                                                      | 2610035D17Rik |
| 1458707_at   | 0.99044 | RIKEN cDNA E430016F16 gene                                                                                      | E430016F16Rik |
| 1458708_at   | 1.75059 | Bromodomain containing 4                                                                                        | Brd4          |
| 1458709_a_at | 1.06218 | ataxin 7-like 1                                                                                                 | Atxn7l1       |
| 1458710_at   | 1.82056 | Polymerase (RNA) II (DNA directed) polypeptide A                                                                | Polr2a        |
| 1458711_at   | 1.00578 | ---                                                                                                             | ---           |
| 1458712_at   | 0.99892 | ---                                                                                                             | ---           |
| 1458713_at   | 0.87773 | ---                                                                                                             | ---           |
| 1458714_at   | 0.94093 | RIKEN cDNA 1700093C20 gene                                                                                      | 1700093C20Rik |
| 1458715_at   | 1.13058 | Caspase 6                                                                                                       | Casp6         |
| 1458716_at   | 1.00027 | dual specificity phosphatase 27 (putative)                                                                      | Dusp27        |
| 1458717_at   | 1.02621 | RIKEN cDNA C030010L15 gene                                                                                      | C030010L15Rik |
| 1458718_at   | 0.97284 | "PREDICTED: Mus musculus hypothetical LOC243025 (LOC243025), mRNA"                                              | ---           |
| 1458719_at   | 1.04165 | Transcribed locus                                                                                               | ---           |
| 1458720_at   | 0.95920 | "DNA segment, Chr 9, ERATO Doi 356, expressed"                                                                  | D9Ertd356e    |
| 1458721_at   | 0.91954 | "Protocadherin gamma subfamily C, 3"                                                                            | Pcdhgc3       |
| 1458722_at   | 1.07283 | RIKEN cDNA 1200015F23 gene                                                                                      | 1200015F23Rik |
| 1458723_at   | 1.06315 | "Similar to Poly(A) binding protein, cytoplasmic 4, isoform 1"                                                  | LOC544782     |
| 1458724_at   | 1.33331 | RIKEN cDNA E230008O15 gene                                                                                      | E230008O15Rik |
| 1458725_at   | 1.01362 | ---                                                                                                             | ---           |
| 1458726_at   | 1.09165 | expressed sequence C87033                                                                                       | C87033        |
| 1458727_at   | 1.03131 | "Protein tyrosine phosphatase-like (proline instead of catalytic arginine), member b"                           | Ptplb         |
| 1458728_at   | 0.95339 | ---                                                                                                             | ---           |
| 1458729_at   | 1.10725 | FK506 binding protein 4                                                                                         | Fkbp4         |
| 1458730_at   | 1.13205 | BTB and CNC homology 2                                                                                          | Bach2         |
| 1458731_at   | 1.03680 | Transcribed locus                                                                                               | ---           |
| 1458732_at   | 1.05826 | ---                                                                                                             | ---           |
| 1458733_at   | 0.86823 | G protein-coupled receptor 149                                                                                  | Gpr149        |
| 1458734_at   | 0.86714 | expressed sequence C78128                                                                                       | C78128        |
| 1458735_at   | 1.00490 | Transcribed locus                                                                                               | ---           |
| 1458736_at   | 0.96614 | ---                                                                                                             | ---           |
| 1458737_at   | 0.94542 | expressed sequence C77097                                                                                       | C77097        |
| 1458738_at   | 0.93678 | "Guanine nucleotide binding protein, alpha 14"                                                                  | Gna14         |
| 1458739_at   | 1.08425 | ---                                                                                                             | ---           |

|            |                                                                                                                                            |
|------------|--------------------------------------------------------------------------------------------------------------------------------------------|
| 1458740_at | 0.87063 --- ---                                                                                                                            |
| 1458741_at | 0.95924 Phosphoglycerate dehydrogenase like 1 Phgdh1                                                                                       |
| 1458742_at | 0.89976 latrophilin 3 Lphn3                                                                                                                |
| 1458743_at | 1.07079 --- ---                                                                                                                            |
| 1458744_at | 0.90584 "TAF1 RNA polymerase II, TATA box binding protein (TBP)-associated factor" Taf1                                                    |
| 1458745_at | 0.87690 "DNA segment, Chr 18, ERATO Doi 201, expressed" D18Ertd201e                                                                        |
| 1458746_at | 0.88075 RIKEN cDNA A430107O13 gene A430107O13Rik                                                                                           |
| 1458747_at | 0.92882 F-box protein 45 Fbxo45                                                                                                            |
| 1458748_at | 1.03505 RNA binding motif protein 27 Rbm27                                                                                                 |
| 1458749_at | 0.96741 Single-stranded DNA binding protein 3 Ssbp3                                                                                        |
| 1458750_at | 0.99095 "15 days embryo head cDNA, RIKEN full-length enriched library, clone: D930028N23 product:unclassifiable, full insert sequence" --- |
| 1458751_at | 0.87664 --- ---                                                                                                                            |
| 1458752_at | 1.06732 "PREDICTED: Mus musculus similar to otogelin (LOC627748), mRNA" ---                                                                |
| 1458753_at | 0.94669 "gene model 941, (NCBI)" Gm941                                                                                                     |
| 1458754_at | 0.95138 --- ---                                                                                                                            |
| 1458755_at | 1.09731 Transcribed locus ---                                                                                                              |
| 1458756_at | 1.00734 "Glutamate receptor, ionotropic, delta 2" Grid2                                                                                    |
| 1458757_at | 0.94518 Polypyrimidine tract binding protein 2 Ptbp2                                                                                       |
| 1458758_at | 1.15016 Vav2 oncogene Vav2                                                                                                                 |
| 1458759_at | 0.95881 Microtubule-associated protein 4 Mtap4                                                                                             |
| 1458760_at | 1.01702 --- ---                                                                                                                            |
| 1458761_at | 0.83727 U box domain containing 5 Ubox5                                                                                                    |
| 1458762_at | 0.83048 expressed sequence AU015230 AU015230                                                                                               |
| 1458763_at | 0.96206 expressed sequence C78024 C78024                                                                                                   |
| 1458764_at | 1.19801 --- ---                                                                                                                            |
| 1458765_at | 1.13516 RNA binding motif protein 10 Rbm10                                                                                                 |
| 1458766_at | 0.96270 P21 (CDKN1A)-activated kinase 7 Pak7                                                                                               |
| 1458767_at | 0.90525 "Glucan (1,4-alpha-), branching enzyme 1" Gbe1                                                                                     |
| 1458768_at | 1.58241 Erythrocyte protein band 4.1-like 5 Epb4.115                                                                                       |
| 1458769_at | 0.95477 "DNA segment, Chr 7, ERATO Doi 558, expressed" D7Ertd558e                                                                          |
| 1458770_at | 1.14076 "DNA segment, Chr 11, ERATO Doi 4, expressed" D11Ertd4e                                                                            |
| 1458771_at | 0.91385 --- ---                                                                                                                            |
| 1458772_at | 1.01851 Latrophilin 3 Lphn3                                                                                                                |
| 1458773_at | 0.93313 "UDP-Gal:betaGlcNAc beta 1,4- galactosyltransferase, polypeptide 1" B4galt1                                                        |
| 1458774_at | 0.94046 "DNA segment, Chr 10, ERATO Doi 584, expressed" D10Ertd584e                                                                        |
| 1458775_at | 1.09458 RIKEN cDNA 1700041E20 gene 1700041E20Rik                                                                                           |
| 1458776_at | 1.09124 --- ---                                                                                                                            |
| 1458777_at | 1.07269 "solute carrier family 18 (vesicular monoamine), member 1" Slc18a1                                                                 |
| 1458778_at | 1.14424 WD repeats and SOF domain containing 1 Wdsof1                                                                                      |
| 1458779_at | 0.95684 RIKEN cDNA 8030445P17 gene 8030445P17Rik                                                                                           |

|            |         |                                                                |                     |
|------------|---------|----------------------------------------------------------------|---------------------|
| 1458780_at | 0.99695 | "DNA segment, Chr 8, ERATO Doi 620, expressed"                 | D8Ertd620e          |
| 1458781_at | 1.07157 | "Potassium channel, subfamily K, member 13"                    | Kcnk13              |
| 1458782_at | 0.99980 | Transcribed locus                                              | ---                 |
| 1458783_at | 0.89689 | ---                                                            | ---                 |
| 1458784_at | 0.95011 | expressed sequence                                             | C78148 C78148       |
| 1458785_at | 0.99324 | Synovial sarcoma translocation gene on chromosome 18-like 1    | Ss1811              |
| 1458786_at | 0.89904 | expressed sequence                                             | C79250 C79250       |
| 1458787_at | 1.00361 | Mitogen activated protein kinase kinase kinase 7               | Map3k7              |
| 1458788_at | 2.50576 | Ecotropic viral integration site 2a                            | Evi2a               |
| 1458789_at | 1.12654 | ---                                                            | ---                 |
| 1458790_at | 1.04307 | ---                                                            | ---                 |
| 1458791_at | 0.88656 | expressed sequence                                             | AU015849 AU015849   |
| 1458792_at | 1.11238 | "DNA segment, Chr 12, ERATO Doi 208, expressed"                | D12Ertd208e         |
| 1458793_at | 1.23858 | Tensin 3                                                       | Tns3                |
| 1458794_at | 0.97800 | ---                                                            | ---                 |
| 1458795_at | 0.89680 | Transcribed locus                                              | ---                 |
| 1458796_at | 0.99192 | ---                                                            | ---                 |
| 1458797_at | 1.05532 | ---                                                            | ---                 |
| 1458798_at | 0.96550 | Transcribed locus                                              | ---                 |
| 1458799_at | 0.93954 | RIKEN cDNA A330033J07 gene                                     | A330033J07Rik       |
| 1458800_at | 0.84613 | Trinucleotide repeat containing 6C                             | Tnrc6c              |
| 1458801_at | 1.05055 | "fusion, derived from t(12;16) malignant liposarcoma (human)"  | Fus                 |
| 1458802_at | 0.94931 | human immunodeficiency virus type I enhancer binding protein 3 | Hivep3              |
| 1458803_at | 0.88684 | schlafen 9 /// similar to schlafen 9                           | Slfn9 /// LOC677619 |
| 1458804_at | 0.86319 | "Solute carrier organic anion transporter family, member 4C1"  | Slco4c1             |
| 1458805_at | 0.88682 | ---                                                            | ---                 |
| 1458806_at | 0.91666 | RIKEN cDNA D230005D02 gene                                     | D230005D02Rik       |
| 1458807_at | 1.26631 | erythrocyte protein band 4.1                                   | Epb4.1              |
| 1458808_at | 1.03934 | "Sushi, nidogen and EGF-like domains 1"                        | Sned1               |
| 1458809_at | 1.35752 | ---                                                            | ---                 |
| 1458810_at | 0.99949 | ---                                                            | ---                 |
| 1458811_at | 0.95479 | RIKEN cDNA 9430047L24 gene                                     | 9430047L24Rik       |
| 1458812_at | 1.02731 | Adenylate kinase 3                                             | Ak3                 |
| 1458813_at | 1.01275 | "sodium channel, voltage-gated, type V, alpha"                 | Scn5a               |
| 1458814_at | 1.07409 | expressed sequence                                             | AU022855 AU022855   |
| 1458815_at | 0.94394 | expressed sequence                                             | AU021884 AU021884   |
| 1458816_at | 1.03378 | ---                                                            | ---                 |
| 1458817_at | 0.93978 | ---                                                            | ---                 |
| 1458818_at | 0.91365 | "DNA segment, Chr 3, ERATO Doi 162, expressed"                 | D3Ertd162e          |
| 1458819_at | 0.96958 | GTPase activating RANGAP domain-like 3                         | Garnl3              |
| 1458820_at | 0.96607 | zinc finger protein 560                                        | Zfp560              |
| 1458821_at | 0.90052 | "SEC24 related gene family, member D (S. cerevisiae)"          | Sec24d              |
| 1458822_at | 1.00731 | ---                                                            | ---                 |

|            |         |                                                        |               |
|------------|---------|--------------------------------------------------------|---------------|
| 1458823_at | 1.36858 | Leucine-rich repeats and immunoglobulin-like domains 1 | Lrig1         |
| 1458824_at | 1.04724 | unc-45 homolog A (C. elegans)                          | Unc45a        |
| 1458825_at | 1.10664 | "Mesoderm induction early response 1, family member 3" | Mier3         |
| 1458826_at | 1.04787 | expressed sequence C78809                              | C78809        |
| 1458827_at | 0.97219 | RAB11 family interacting protein 4 (class II)          | Rab11fip4     |
| 1458828_at | 1.15906 | Expressed sequence AW146242                            | AW146242      |
| 1458829_at | 1.03887 | ---                                                    | ---           |
| 1458830_at | 0.96657 | Fibroblast growth factor 14                            | Fgf14         |
| 1458831_at | 0.98168 | NAD(P) dependent steroid dehydrogenase-like            | Nsdhl         |
| 1458832_at | 0.99243 | Growth hormone receptor                                | Ghr           |
| 1458833_at | 0.87514 | RIKEN cDNA C130076O07 gene                             | C130076O07Rik |
| 1458834_at | 0.99093 | Mitochondrial tumor suppressor 1                       | Mtus1         |
| 1458835_at | 0.95720 | ---                                                    | ---           |
| 1458836_at | 1.02899 | calbindin-28K                                          | Calb1         |
| 1458837_at | 0.82525 | RIKEN cDNA 2810006K23 gene                             | 2810006K23Rik |
| 1458838_at | 1.01594 | RIKEN cDNA 4732468M13 gene                             | 4732468M13Rik |
| 1458839_at | 1.04635 | exocyst complex component 8                            | Exoc8         |
| 1458840_at | 0.95545 | Transcribed locus                                      | ---           |
| 1458841_at | 0.87875 | NudC domain containing 1                               | Nudcd1        |
| 1458842_at | 1.07311 | ---                                                    | ---           |
| 1458843_at | 0.95228 | DEP domain containing 5                                | Depdc5        |
| 1458844_at | 0.97895 | RIKEN cDNA 4933415L06 gene                             | 4933415L06Rik |
| 1458845_at | 0.98242 | "DNA segment, Chr 4, ERATO Doi 264, expressed"         | D4Ertd264e    |
| 1458846_at | 1.09792 | ---                                                    | ---           |
| 1458847_at | 1.01342 | ---                                                    | ---           |
| 1458848_at | 0.94287 | Hypothetical protein LOC624549                         | LOC624549     |
| 1458849_at | 1.03609 | N-acylsphingosine amidohydrolase 2                     | Asah2         |
| 1458850_at | 0.95681 | "Myosin, heavy polypeptide 6, cardiac muscle, alpha"   | Myh6          |
| 1458851_at | 0.96991 | Transcribed locus                                      | ---           |
| 1458852_at | 0.98867 | ---                                                    | ---           |
| 1458853_at | 0.89436 | Pre B-cell leukemia transcription factor 1             | Pbx1          |
| 1458854_at | 1.12853 | expressed sequence C78891                              | C78891        |
| 1458855_at | 0.92914 | "DNA segment, Chr 11, ERATO Doi 49, expressed"         | D11Ertd49e    |
| 1458856_at | 1.01393 | ---                                                    | ---           |
| 1458857_at | 1.01391 | Transcribed locus                                      | ---           |
| 1458858_at | 1.01045 | ---                                                    | ---           |
| 1458859_at | 0.93774 | ---                                                    | ---           |
| 1458860_at | 0.81034 | ---                                                    | ---           |
| 1458861_at | 0.95961 | ---                                                    | ---           |
| 1458862_at | 0.96856 | expressed sequence C78704                              | C78704        |
| 1458863_at | 0.96613 | RIKEN cDNA 6330415G19 gene                             | 6330415G19Rik |
| 1458864_at | 1.10328 | ---                                                    | ---           |
| 1458865_at | 1.08251 | ---                                                    | ---           |

|              |         |                                                                             |               |
|--------------|---------|-----------------------------------------------------------------------------|---------------|
| 1458866_at   | 0.90673 | RIKEN cDNA A930001M12 gene                                                  | A930001M12Rik |
| 1458867_at   | 0.99444 | EGF-like repeats and discoidin I-like domains 3                             | Edil3         |
| 1458868_at   | 1.08957 | "ATPase, Na <sup>+</sup> /K <sup>+</sup> transporting, alpha 1 polypeptide" | Atp1a1        |
| 1458869_at   | 0.90789 | RIKEN cDNA 2900076A13 gene                                                  | 2900076A13Rik |
| 1458870_x_at | 0.98514 | "pam, highwire, rpm 1"                                                      | Phr1          |
| 1458871_at   | 1.01455 | "transmembrane protease, serine 11e"                                        | Tmprss11e     |
| 1458872_at   | 0.95740 | ---                                                                         | ---           |
| 1458873_at   | 0.94728 | "asp (abnormal spindle)-like, microcephaly associated (Drosophila)"         | Aspm          |
| 1458874_at   | 0.96053 | FAT tumor suppressor homolog 3 (Drosophila)                                 | Fat3          |
| 1458875_at   | 0.95053 | "SEC24 related gene family, member B (S. cerevisiae)"                       | Sec24b        |
| 1458876_at   | 0.99319 | Enabled homolog (Drosophila)                                                | Enah          |
| 1458877_at   | 1.02524 | Transcribed locus                                                           | ---           |
| 1458878_at   | 1.04631 | Yamaguchi sarcoma viral (v-yes) oncogene homolog 1                          | Yes1          |
| 1458879_at   | 1.07548 | expressed sequence C76798                                                   | C76798        |
| 1458880_at   | 0.98518 | ---                                                                         | ---           |
| 1458881_at   | 1.05372 | RIKEN cDNA 9530001P21 gene                                                  | 9530001P21Rik |
| 1458882_at   | 1.06159 | "serine (or cysteine) peptidase inhibitor, clade B, member 8"               | Serpinb8      |
| 1458883_at   | 1.11160 | ---                                                                         | ---           |
| 1458884_at   | 1.38309 | ---                                                                         | ---           |
| 1458885_at   | 0.86809 | ---                                                                         | ---           |
| 1458886_at   | 1.00184 | Speckle-type POZ protein                                                    | Spop          |
| 1458887_at   | 0.92836 | transcription factor 21                                                     | Tcf21         |
| 1458888_at   | 1.02839 | CDNA clone IMAGE:5250818                                                    | ---           |
| 1458889_at   | 1.10038 | Ena-vasodilator stimulated phosphoprotein                                   | Evl           |
| 1458890_at   | 0.96871 | RIKEN cDNA D030055H07 gene                                                  | D030055H07Rik |
| 1458891_at   | 1.09839 | GTPase activating RANGAP domain-like 3                                      | Garnl3        |
| 1458892_at   | 0.85546 | RIKEN cDNA 9430047G12 gene                                                  | 9430047G12Rik |
| 1458893_at   | 0.93119 | Transcribed locus                                                           | ---           |
| 1458894_at   | 1.05043 | ---                                                                         | ---           |
| 1458895_at   | 1.09902 | expressed sequence C80008                                                   | C80008        |
| 1458896_at   | 1.01636 | glucocorticoid modulatory element binding protein 1                         | Gmeb1         |
| 1458897_at   | 1.01051 | uronyl-2-sulfotransferase                                                   | Ust           |
| 1458898_at   | 0.99751 | ---                                                                         | ---           |
| 1458899_at   | 1.29222 | ubiquitin specific peptidase 53                                             | Usp53         |
| 1458900_at   | 0.92780 | "Solute carrier family 24 (sodium/potassium/calcium exchanger), member 3"   | Slc24a3       |
| 1458901_at   | 0.98453 | Myocyte enhancer factor 2D                                                  | Mef2d         |
| 1458902_at   | 0.99616 | ---                                                                         | ---           |
| 1458903_at   | 1.00836 | RIKEN cDNA A230057G18 gene                                                  | A230057G18Rik |
| 1458904_at   | 0.85899 | Frizzled homolog 6 (Drosophila)                                             | Fzd6          |
| 1458905_x_at | 0.88029 | RIKEN cDNA 2610002D18 gene                                                  | 2610002D18Rik |
| 1458906_at   | 1.11279 | ---                                                                         | ---           |
| 1458907_at   | 0.85658 | "Solute carrier organic anion transporter family, member 6b1"               | Slco6b1       |

|            |         |                                                                                                                             |               |
|------------|---------|-----------------------------------------------------------------------------------------------------------------------------|---------------|
| 1458908_at | 0.99913 | Dystrobrevin alpha                                                                                                          | Dtna          |
| 1458909_at | 1.04167 | ---                                                                                                                         | ---           |
| 1458910_at | 1.02217 | ---                                                                                                                         | ---           |
| 1458911_at | 0.87285 | RIKEN cDNA C230086A09 gene                                                                                                  | C230086A09Rik |
| 1458912_at | 1.18906 | RNA binding motif protein 6                                                                                                 | Rbm6          |
| 1458913_at | 0.97366 | RIKEN cDNA 4831440E17 gene                                                                                                  | 4831440E17Rik |
| 1458914_at | 1.09082 | ---                                                                                                                         | ---           |
| 1458915_at | 1.04202 | expressed sequence C77949                                                                                                   | C77949        |
| 1458916_at | 1.33830 | "Solute carrier family 12, member 6"                                                                                        | Slc12a6       |
| 1458917_at | 1.17224 | DEP domain containing 5 Depdc5                                                                                              |               |
| 1458918_at | 0.88991 | "solute carrier family 12 (potassium/chloride transporters), member 8"                                                      | Slc12a8       |
| 1458919_at | 1.36315 | "muskelin 1, intracellular mediator containing kelch motifs"                                                                | Mkln1         |
| 1458920_at | 1.16710 | Syntaxin 6                                                                                                                  | Stx6          |
| 1458921_at | 1.36173 | hypothetical gene supported by AK043371                                                                                     | LOC434348     |
| 1458922_at | 0.92291 | mitogen-activated protein kinase kinase kinase 9                                                                            | Map3k9        |
| 1458923_at | 0.93538 | Methionine sulfoxide reductase A                                                                                            | Msra          |
| 1458924_at | 1.38895 | RIKEN cDNA D430013B06 gene                                                                                                  | D430013B06Rik |
| 1458925_at | 1.05063 | zinc finger protein 82                                                                                                      | Zfp82         |
| 1458926_at | 1.26766 | RIKEN cDNA 5830415L20 gene                                                                                                  | 5830415L20Rik |
| 1458927_at | 0.95447 | "ATPase, Ca <sup>++</sup> transporting, cardiac muscle, slow twitch 2"                                                      | Atp2a2        |
| 1458928_at | 0.96791 | ---                                                                                                                         | ---           |
| 1458929_at | 0.92821 | ATP-binding cassette transporter sub-family A member 9                                                                      | Abca9         |
| 1458930_at | 0.89545 | "alpha-1,4-N-acetylglucosaminyltransferase"                                                                                 | A4gnt         |
| 1458931_at | 1.13635 | RIKEN cDNA 6030427F01 gene                                                                                                  | 6030427F01Rik |
| 1458932_at | 1.05699 | peroxin 2                                                                                                                   | Pex2          |
| 1458933_at | 0.92910 | RIKEN cDNA A530052I06 gene                                                                                                  | A530052I06Rik |
| 1458934_at | 1.08743 | "DNA segment, Chr 5, ERATO Doi 505 , expressed"                                                                             | D5ErtD505e    |
| 1458935_at | 0.99909 | expressed sequence C79744                                                                                                   | C79744        |
| 1458936_at | 1.05180 | ---                                                                                                                         | ---           |
| 1458937_at | 0.97026 | 5'-nucleotidase domain containing 1                                                                                         | Nt5dc1        |
| 1458938_at | 0.97339 | ---                                                                                                                         | ---           |
| 1458939_at | 0.99812 | Synaptojanin 2 binding protein                                                                                              | Synj2bp       |
| 1458940_at | 0.96114 | RIKEN cDNA 5730507A11 gene                                                                                                  | 5730507A11Rik |
| 1458941_at | 1.00024 | RIKEN cDNA D130016B08 gene                                                                                                  | D130016B08Rik |
| 1458942_at | 1.03426 | RIKEN cDNA C230037E05 gene                                                                                                  | C230037E05Rik |
| 1458943_at | 0.99319 | ---                                                                                                                         | ---           |
| 1458944_at | 1.06060 | "Adult male testis cDNA, RIKEN full-length enriched library, clone:4930542D16 product:unclassifiable, full insert sequence" | ---           |
| 1458945_at | 0.94353 | expressed sequence AU015148                                                                                                 | AU015148      |
| 1458946_at | 1.02177 | ---                                                                                                                         | ---           |
| 1458947_at | 1.80266 | RIKEN cDNA 2010111I01 gene                                                                                                  | 2010111I01Rik |
| 1458948_at | 0.99333 | RIKEN cDNA D630013N20 gene                                                                                                  | D630013N20Rik |
| 1458949_at | 1.08827 | RIKEN cDNA 5330434G04 gene                                                                                                  | 5330434G04Rik |

|            |         |                                                                                          |               |  |
|------------|---------|------------------------------------------------------------------------------------------|---------------|--|
| 1458950_at | 0.87212 | Transcribed locus                                                                        | ---           |  |
| 1458951_at | 0.96271 | vaccinia related kinase 1                                                                | Vrk1          |  |
| 1458952_at | 1.00115 | WD repeat and FYVE domain containing 3                                                   | Wdfy3         |  |
| 1458953_at | 0.98841 | "DNA segment, Chr 5, ERATO Doi 215, expressed"                                           | D5Ertd215e    |  |
| 1458954_at | 0.90827 | ---                                                                                      | ---           |  |
| 1458955_at | 1.05842 | Eukaryotic translation elongation factor 1 gamma                                         | Eef1g         |  |
| 1458956_at | 0.96676 | RIKEN cDNA A330068P14 gene                                                               | A330068P14Rik |  |
| 1458957_at | 0.93977 | "Similar to pyridoxal (pyridoxine, vitamin B6) kinase"                                   | LOC623548     |  |
| 1458958_at | 0.86241 | neighbor of Punc E11                                                                     | Nope          |  |
| 1458959_at | 1.00212 | "AF4/FMR2 family, member 4"                                                              | Aff4          |  |
| 1458960_at | 1.21776 | Receptor-like tyrosine kinase                                                            | Ryk           |  |
| 1458961_at | 1.04350 | eyes absent 3 homolog (Drosophila)                                                       | Eya3          |  |
| 1458962_at | 1.08079 | transmembrane emp24 protein transport domain containing 5                                | Tmed5         |  |
| 1458963_at | 1.10099 | RIKEN cDNA 1810054D07 gene                                                               | 1810054D07Rik |  |
| 1458964_at | 1.08842 | Interleukin 1 receptor accessory protein-like 1                                          | Il1rapl1      |  |
| 1458965_at | 0.96546 | ---                                                                                      | ---           |  |
| 1458966_at | 0.87954 | expressed sequence C80278                                                                | C80278        |  |
| 1458967_at | 0.97344 | Transcribed locus                                                                        | ---           |  |
| 1458968_at | 0.98693 | expressed sequence C80283                                                                | C80283        |  |
| 1458969_at | 1.17448 | expressed sequence AU019559                                                              | AU019559      |  |
| 1458970_at | 0.96418 | RAD50 homolog ( <i>S. cerevisiae</i> )                                                   | Rad50         |  |
| 1458971_at | 0.87377 | ---                                                                                      | ---           |  |
| 1458972_at | 1.28960 | RIKEN cDNA 9330112F22 gene                                                               | 9330112F22Rik |  |
| 1458973_at | 1.02984 | "PREDICTED: Mus musculus similar to RAB5A, member RAS oncogene family (LOC629071), mRNA" | ---           |  |
| 1458974_at | 0.93485 | Thymocyte selection-associated HMG box gene                                              | Tox           |  |
| 1458975_at | 0.93428 | Transcribed locus                                                                        | ---           |  |
| 1458976_at | 1.02598 | RIKEN cDNA C230035I16 gene                                                               | C230035I16Rik |  |
| 1458977_at | 0.98766 | hypothetical protein A530021J07                                                          | A530021J07    |  |
| 1458978_at | 0.93718 | ---                                                                                      | ---           |  |
| 1458979_at | 0.97173 | ---                                                                                      | ---           |  |
| 1458980_at | 2.36464 | ---                                                                                      | ---           |  |
| 1458981_at | 1.28453 | Transcribed locus                                                                        | ---           |  |
| 1458982_at | 1.02628 | expressed sequence AU014965                                                              | AU014965      |  |
| 1458983_at | 1.14123 | expressed sequence AU015559                                                              | AU015559      |  |
| 1458984_at | 0.92097 | RIKEN cDNA E130308A19 gene                                                               | E130308A19Rik |  |
| 1458985_at | 1.30805 | furry homolog (Drosophila)                                                               | Fry           |  |
| 1458986_at | 1.00353 | RIKEN cDNA 4930534H18 gene                                                               | 4930534H18Rik |  |
| 1458987_at | 0.82554 | Cyclin-dependent kinase 7 (homolog of Xenopus MO15 cdk-activating kinase)                | Cdk7          |  |
| 1458988_at | 1.08344 | ---                                                                                      | ---           |  |
| 1458989_at | 1.05793 | "LIM-domain containing, protein kinase"                                                  | Limk1         |  |
| 1458990_at | 0.88752 | SET domain containing 5                                                                  | Setd5         |  |



1458991\_at 1.17468 "Solute carrier family 37 (glycerol-3-phosphate transporter), member 1" Slc37a1  
 1458992\_at 0.99184 SUMO/sentrin specific peptidase 5 Senp5  
 1458993\_at 0.94919 expressed sequence AU022882 AU022882  
 1458994\_at 1.36527 "Casein kinase 1, gamma 3" Csnk1g3  
 1458995\_at 0.89725 Expressed sequence AA408296 AA408296  
 1458996\_at 1.14318 integrin alpha 5 (fibronectin receptor alpha) Itga5  
 1458997\_at 0.99532 RIKEN cDNA A230106M20 gene A230106M20Rik  
 1458998\_at 1.02210 oligonucleotide/oligosaccharide-binding fold containing 1 Obfc1  
 1458999\_at 1.17838 Mitochondrial ribosomal protein S10 Mrps10  
 1459000\_at 1.11216 --- ---  
 1459001\_at 1.13856 Vacuolar protein sorting 33A (yeast) Vps33a  
 1459002\_at 1.01035 ribosomal protein L21 /// similar to 60S ribosomal protein L21 /// similar to  
 ribosomal protein L21 /// similar to ribosomal protein L21 /// similar to ribosomal protein L21 /// similar  
 to ribosomal protein L21 /// similar to 60S ribosomal protein L21 /// similar to 60S ribosomal protein  
 L21 /// similar to ribosomal protein L21 /// similar to ribosomal protein L21 /// similar to ribosomal  
 protein L21 /// similar to ribosomal protein L21 /// similar to ribosomal protein L21 /// similar to  
 ribosomal protein L21 /// similar to ribosomal protein L21 /// similar to ribosomal protein L21 /// similar  
 to 60S ribosomal protein L21 /// similar to ribosomal protein L21 /// similar to ribosomal protein L21 ///  
 similar to ribosomal protein L21 /// similar to ribosomal protein L21 /// similar to ribosomal protein  
 L21 /// similar to 60S ribosomal protein L21 /// similar to ribosomal protein L21 /// similar to 60S  
 ribosomal protein L21 /// similar to ribosomal protein L21 /// similar to ribosomal protein L21 /// similar  
 to ribosomal protein L21 /// similar to ribosomal protein L21 /// similar to ribosomal protein L21 ///  
 similar to ribosomal protein L21 /// similar to ribosomal protein L21 /// similar to ribosomal protein  
 L21 /// similar to ribosomal protein L21 /// similar to ribosomal protein L21 /// similar to ribosomal  
 protein L21 /// similar to ribosomal protein L21 /// similar to ribosomal protein L21 /// similar to  
 ribosomal protein L21 /// similar to ribosomal protein L21 /// similar to ribosomal protein L21 ///  
 hypothetical protein LOC665245 /// similar to ribosomal protein L21 /// similar to ribosomal protein  
 L21 /// similar to ribosomal protein L21 /// similar to 60S ribosomal protein L21 /// similar to ribosomal  
 protein L21 /// similar to ribosomal protein L21 /// similar to 60S ribosomal protein L21 /// similar to  
 60S ribosomal protein L21 /// similar to ribosomal protein L21 /// similar to ribosomal protein L21 ///  
 similar to 60S ribosomal protein L21 /// similar to ribosomal protein L21 /// similar to ribosomal protein  
 L21 /// similar to 60S ribosomal protein L21 /// similar to 60S ribosomal protein L21 /// similar to  
 ribosomal protein L21 /// hypothetical protein LOC671626 /// similar to 60S ribosomal protein L21 ///  
 similar to ribosomal protein L21 /// hypothetical protein LOC673532 /// similar to 60S ribosomal protein  
 L21 /// similar to ribosomal protein L21 /// similar to 60S ribosomal protein L21 /// similar to ribosomal  
 protein L21 /// similar to 60S ribosomal protein L21 /// hypothetical protein LOC675371 /// similar to  
 ribosomal protein L21 /// similar to ribosomal protein L21 /// similar to ribosomal protein L21 /// similar  
 to ribosomal protein L21 /// similar to ribosomal protein L21 /// similar to ribosomal protein L21 ///  
 similar to ribosomal protein L21 /// similar to ribosomal protein L21 /// similar to 60S ribosomal protein  
 L21 /// similar to ribosomal protein L21 /// similar to 60S ribosomal protein L21 /// similar to ribosomal  
 protein L21 /// similar to 60S ribosomal protein L21 /// similar to ribosomal protein L21 Rpl21 ///  
 LOC268676 /// LOC382843 /// LOC432665 /// LOC432725 /// LOC432801 /// LOC433125 ///  
 LOC433168 /// LOC433319 /// LOC433387 /// LOC433630 /// LOC434067 /// LOC434253 ///

LOC545172 /// LOC545226 /// LOC545423 /// LOC545572 /// LOC545877 /// LOC620520 ///  
 LOC620771 /// LOC625038 /// LOC627939 /// LOC628449 /// LOC628822 /// LOC631359 ///  
 LOC632448 /// LOC633404 /// LOC634339 /// LOC634904 /// LOC635258 /// LOC636187 ///  
 LOC636855 /// LOC637748 /// LOC637883 /// LOC637900 /// LOC637907 /// LOC637993 ///  
 LOC638534 /// LOC639424 /// LOC639991 /// LOC640096 /// LOC665245 /// LOC665251 ///  
 LOC665821 /// LOC666340 /// LOC666977 /// LOC667610 /// LOC668319 /// LOC668785 ///  
 LOC668919 /// LOC669703 /// LOC669967 /// LOC670607 /// LOC670636 /// LOC670852 ///  
 LOC670966 /// LOC671028 /// LOC671397 /// LOC671626 /// LOC672341 /// LOC672798 ///  
 LOC673532 /// LOC674403 /// LOC674827 /// LOC675035 /// LOC675278 /// LOC675313 ///  
 LOC675371 /// LOC675601 /// LOC675818 /// LOC675935 /// LOC676253 /// LOC676590 ///  
 LOC676825 /// LOC676831 /// LOC676903 /// LOC677032 /// LOC677133 /// LOC677463 ///  
 LOC677495 /// LOC677530 /// LOC677659

1459003\_at 1.01405 four and a half LIM domains 1 Fhl1  
 1459004\_at 0.93974 --- ---  
 1459005\_at 2.02258 RIKEN cDNA D030051N19 gene D030051N19Rik  
 1459006\_a\_at 0.91483 Hypothetical gene supported by AK083927 LOC432938  
 1459007\_at 0.99545 Transcribed locus ---  
 1459008\_at 2.20071 --- ---  
 1459009\_at 1.36637 Utrophin Utrn  
 1459010\_at 1.08818 RIKEN cDNA 5430437P03 gene 5430437P03Rik  
 1459011\_at 1.19987 Ubiquitin carboxyl-terminal esterase L5 Uchl5  
 1459012\_at 1.01830 RIKEN cDNA A730041O05 gene A730041O05Rik  
 1459013\_at 0.92729 --- ---  
 1459014\_at 1.02267 RIKEN cDNA 2900019G14 gene 2900019G14Rik  
 1459015\_at 1.02662 "Potassium voltage-gated channel, subfamily H (eag-related), member 8" Kcnh8  
 1459016\_at 1.05105 "Insulin-like growth factor 2, binding protein 3" Igf2bp3  
 1459017\_at 1.03210 --- ---  
 1459018\_at 0.91206 "DNA segment, Chr 10, ERATO Doi 447, expressed" D10Ertd447e  
 1459019\_at 1.07573 shadow of prion protein Sprn  
 1459020\_at 0.94080 adhesion molecule with Ig like domain 1 Amigo1  
 1459021\_at 0.98617 Transcribed locus ---  
 1459022\_at 1.11735 --- ---  
 1459023\_at 0.91802 --- ---  
 1459024\_at 0.90227 Transcribed locus ---  
 1459025\_at 1.02204 RIKEN cDNA 1700001J04 gene 1700001J04Rik  
 1459026\_at 1.44282 SNW domain containing 1 Snw1  
 1459027\_at 0.85976 Transcribed locus ---  
 1459028\_at 1.15565 "UTP20, small subunit (SSU) processome component, homolog (yeast)"  
 Utp20  
 1459029\_at 0.91496 P21 (CDKN1A)-activated kinase 1 Pak1  
 1459030\_at 1.00610 --- ---  
 1459031\_at 1.03916 "tubulin tyrosine ligase-like family, member 4" Ttl14  
 1459032\_at 1.09515 Transcribed locus ---

|              |         |                                                             |               |  |
|--------------|---------|-------------------------------------------------------------|---------------|--|
| 1459033_at   | 0.99735 | Plexin A2                                                   | Plxna2        |  |
| 1459034_at   | 0.69583 | WD repeat domain 19                                         | Wdr19         |  |
| 1459035_at   | 0.98698 | ---                                                         | ---           |  |
| 1459036_at   | 0.94188 | RIKEN cDNA 4930402E16 gene                                  | 4930402E16Rik |  |
| 1459037_at   | 0.90028 | "gene model 1614, (NCBI)"                                   | Gm1614        |  |
| 1459038_at   | 0.96026 | Transcribed locus                                           | ---           |  |
| 1459039_at   | 1.05433 | HEAT repeat containing 1                                    | Heatr1        |  |
| 1459040_at   | 0.88244 | High mobility group nucleosomal binding domain 3            | Hmgn3         |  |
| 1459041_at   | 1.06269 | Sorting nexin 12                                            | Snx12         |  |
| 1459042_at   | 0.98579 | regulating synaptic membrane exocytosis 3                   | Rims3         |  |
| 1459043_at   | 0.97153 | "Farnesyltransferase, CAAX box, beta"                       | Fntb          |  |
| 1459044_at   | 1.00499 | expressed sequence AU015558                                 | AU015558      |  |
| 1459045_at   | 1.00605 | golgi phosphoprotein 4                                      | Golph4        |  |
| 1459046_at   | 1.08761 | RIKEN cDNA 4930473A06 gene                                  | 4930473A06Rik |  |
| 1459047_x_at | 1.01003 | RIKEN cDNA 5430405G24 gene                                  | 5430405G24Rik |  |
| 1459048_s_at | 0.95377 | zinc finger protein 142                                     | Zfp142        |  |
| 1459049_at   | 1.01890 | RAS protein-specific guanine nucleotide-releasing factor 1  | Rasgrf1       |  |
| 1459050_at   | 0.97669 | "gene model 996, (NCBI)"                                    | Gm996         |  |
| 1459051_at   | 0.95186 | RIKEN cDNA 6530418L21 gene                                  | 6530418L21Rik |  |
| 1459052_at   | 0.95712 | "Hypoxia inducible factor 3, alpha subunit"                 | Hif3a         |  |
| 1459053_at   | 0.97750 | "centaurin, gamma 2"                                        | Centg2        |  |
| 1459054_at   | 1.00244 | cDNA sequence BC035954                                      | BC035954      |  |
| 1459055_at   | 1.17707 | forkhead box J3                                             | Foxj3         |  |
| 1459056_at   | 0.95399 | RAS protein-specific guanine nucleotide-releasing factor 1  | Rasgrf1       |  |
| 1459057_at   | 0.92261 | Tudor domain containing 3                                   | Tdrd3         |  |
| 1459058_at   | 0.92577 | sialic acid acetyltransferase                               | Siae          |  |
| 1459059_at   | 1.00901 | RIKEN cDNA 2010308F09 gene                                  | 2010308F09Rik |  |
| 1459060_at   | 1.03461 | Shc SH2-domain binding protein 1                            | Shcbp1        |  |
| 1459061_at   | 0.93255 | Transferrin receptor 2                                      | Trfr2         |  |
| 1459062_x_at | 1.10495 | Expressed sequence AU041133                                 | AU041133      |  |
| 1459063_at   | 0.93242 | Transcribed locus                                           | ---           |  |
| 1459064_at   | 0.96701 | "Discs, large homolog 2 (Drosophila)"                       | Dlgh2         |  |
| 1459065_at   | 1.15496 | "Kalirin, RhoGEF kinase"                                    | Kalrn         |  |
| 1459066_at   | 0.98395 | zinc finger protein 612                                     | Zfp612        |  |
| 1459067_at   | 0.91726 | RIKEN cDNA 1190002N15 gene                                  | 1190002N15Rik |  |
| 1459068_at   | 1.37904 | Transmembrane protein 109                                   | Tmem109       |  |
| 1459069_at   | 1.04871 | "Protein phosphatase 1D magnesium-dependent, delta isoform" | Ppm1d         |  |
| 1459070_at   | 0.88103 | Transcribed locus                                           | ---           |  |
| 1459071_at   | 0.87587 | Transcribed locus                                           | ---           |  |
| 1459072_at   | 1.03929 | Transcribed locus                                           | ---           |  |
| 1459073_x_at | 1.02460 | Fibroblast growth factor 14                                 | Fgf14         |  |
| 1459074_at   | 1.02873 | ---                                                         | ---           |  |
| 1459075_at   | 0.92197 | expressed sequence AU022479                                 | AU022479      |  |

1459076\_at 0.95491 CDNA sequence BC052040 BC052040  
1459077\_at 0.90919 "Cytochrome P450, family 2, subfamily d, polypeptide 26" Cyp2d26  
1459078\_at 1.26389 RNA binding protein gene with multiple splicing Rbpms  
1459079\_at 1.03008 --- ---  
1459080\_at 0.88478 --- ---  
1459081\_at 0.94061 RIKEN cDNA 1700007B14 gene 1700007B14Rik  
1459082\_at 1.05618 Transcribed locus ---  
1459083\_at 0.97514 RIKEN cDNA A330084C13 gene A330084C13Rik  
1459084\_at 0.94552 "PREDICTED: Mus musculus similar to cyclin-dependent kinase 10 isoform 2  
(LOC624138), mRNA" ---  
1459085\_at 1.00792 "DNA segment, Chr 1, ERATO Doi 259, expressed" D1Ert259e  
1459086\_at 0.97023 RIKEN cDNA A430107P09 gene A430107P09Rik  
1459087\_at 0.89497 --- ---  
1459088\_at 0.95416 expressed sequence C79557 C79557  
1459089\_at 0.92945 hypothetical LOC545637 /// hypothetical LOC623272 /// hypothetical  
LOC623281 /// hypothetical protein LOC636750 /// hypothetical protein LOC667780 LOC545637 ///  
LOC623272 /// LOC623281 /// LOC636750 /// LOC667780  
1459090\_at 1.11781 UBX domain containing 4 Ubx4  
1459091\_at 1.12922 --- ---  
1459092\_at 1.01685 "solute carrier organic anion transporter family, member 6c1" Slco6c1  
1459093\_at 0.96916 Fraser syndrome 1 homolog (human) Fras1  
1459094\_at 0.97534 Synaptosomal-associated protein 91 Snap91  
1459095\_at 0.97854 --- ---  
1459096\_at 0.98933 Activating transcription factor 7 interacting protein Atf7ip  
1459097\_at 0.96641 Interleukin 17 receptor D Il17rd  
1459098\_at 1.61196 Dystonin Dst  
1459099\_at 0.91794 transmembrane channel-like gene family 7 Tmc7  
1459100\_at 0.97395 expressed sequence AU015253 AU015253  
1459101\_at 0.96810 expressed sequence C78760 C78760  
1459102\_at 0.90197 Myosin ID Myo1d  
1459103\_at 0.97913 Histone cell cycle regulation defective homolog A (S. cerevisiae) Hira  
1459104\_at 1.13816 budding uninhibited by benzimidazoles 3 homolog (S. cerevisiae) Bub3  
1459105\_at 0.96131 --- ---  
1459106\_at 1.00523 "PREDICTED: Mus musculus hypothetical protein LOC622817 (LOC622817),  
mRNA" ---  
1459107\_at 0.98269 "potassium voltage-gated channel, subfamily H (eag-related), member 3" Kcnh3  
1459108\_a\_at 1.07657 YEATS domain containing 2 Yeats2  
1459109\_at 0.97697 "sema domain, seven thrombospondin repeats (type 1 and type 1-like),  
transmembrane domain (TM) and short cytoplasmic domain, (semaphorin) 5A" Sema5a  
1459110\_at 1.00604 Myosin IXb Myo9b  
1459111\_at 0.97000 RIKEN cDNA 4831440E17 gene 4831440E17Rik  
1459112\_at 1.06541 "Adult male testis cDNA, RIKEN full-length enriched library,  
clone:4930558M01 product:unclassifiable, full insert sequence" ---

|              |         |                                                                                                                                     |               |  |
|--------------|---------|-------------------------------------------------------------------------------------------------------------------------------------|---------------|--|
| 1459113_at   | 0.92559 | Neurofascin                                                                                                                         | Nfasc         |  |
| 1459114_at   | 0.96929 | Ankyrin repeat and SAM domain containing 1                                                                                          | Anks1         |  |
| 1459115_at   | 1.06728 | Transcribed locus                                                                                                                   | ---           |  |
| 1459116_at   | 1.02006 | Neural cell adhesion molecule 2                                                                                                     | Ncam2         |  |
| 1459117_at   | 0.94658 | Transcribed locus                                                                                                                   | ---           |  |
| 1459118_at   | 1.25019 | hypothetical protein D230038C21                                                                                                     | D230038C21    |  |
| 1459119_at   | 1.03891 | centromere protein O                                                                                                                | Cenpo         |  |
| 1459120_at   | 1.03216 | erythrocyte protein band 4.1-like 5                                                                                                 | Epb4.115      |  |
| 1459121_at   | 0.96568 | "9 days embryo whole body cDNA, RIKEN full-length enriched library, clone: D030030M01 product:unclassifiable, full insert sequence" | ---           |  |
| 1459122_at   | 1.03049 | RIKEN cDNA C230086A09 gene                                                                                                          | C230086A09Rik |  |
| 1459123_at   | 1.07337 | ---                                                                                                                                 | ---           |  |
| 1459124_at   | 0.87856 | Proprotein convertase subtilisin/kexin type 5                                                                                       | Pcsk5         |  |
| 1459125_at   | 1.06486 | RIKEN cDNA D030059C06 gene                                                                                                          | D030059C06Rik |  |
| 1459126_at   | 0.93567 | Neuronal growth regulator 1                                                                                                         | Negr1         |  |
| 1459127_at   | 0.92950 | Transcribed locus                                                                                                                   | ---           |  |
| 1459128_at   | 1.04270 | Nicotinamide nucleotide adenylyltransferase 3                                                                                       | Nmnat3        |  |
| 1459129_at   | 0.97289 | "Adult male testis cDNA, RIKEN full-length enriched library, clone:4930548A09 product:unclassifiable, full insert sequence"         | ---           |  |
| 1459130_at   | 1.07354 | "HECT domain and ankyrin repeat containing, E3 ubiquitin protein ligase 1"                                                          | Hace1         |  |
| 1459131_at   | 1.07914 | Transformation related protein 53 binding protein 1                                                                                 | Trp53bp1      |  |
| 1459132_at   | 1.00625 | basonuclin 2                                                                                                                        | Bnc2          |  |
| 1459133_at   | 1.10353 | "ER degradation enhancer, mannosidase alpha-like 3"                                                                                 | Edem3         |  |
| 1459134_at   | 1.19192 | CDC91 cell division cycle 91-like 1 (S. cerevisiae)                                                                                 | Cdc911        |  |
| 1459135_at   | 1.09653 | "Decapping enzyme, scavenger"                                                                                                       | Dcps          |  |
| 1459136_at   | 0.97886 | BTB and CNC homology 2                                                                                                              | Bach2         |  |
| 1459137_at   | 1.04471 | promyelocytic leukemia                                                                                                              | Pml           |  |
| 1459138_at   | 0.97071 | ---                                                                                                                                 | ---           |  |
| 1459139_at   | 0.73355 | ---                                                                                                                                 | ---           |  |
| 1459140_at   | 1.01587 | ---                                                                                                                                 | ---           |  |
| 1459141_at   | 1.12546 | RIKEN cDNA 1810008I18 gene                                                                                                          | 1810008I18Rik |  |
| 1459142_at   | 1.03731 | sperm associated antigen 17                                                                                                         | Spag17        |  |
| 1459143_at   | 1.11919 | coiled-coil-helix-coiled-coil-helix domain containing 3                                                                             | Chchd3        |  |
| 1459144_at   | 1.35113 | Fibronectin type III domain containing 3a                                                                                           | Fndc3a        |  |
| 1459145_at   | 1.08433 | RIKEN cDNA A930033H14 gene                                                                                                          | A930033H14Rik |  |
| 1459146_at   | 0.97731 | mitogen-activated protein kinase 6                                                                                                  | Mapk6         |  |
| 1459147_at   | 1.13498 | ---                                                                                                                                 | ---           |  |
| 1459148_at   | 1.08271 | Paired box gene 3                                                                                                                   | Pax3          |  |
| 1459149_at   | 0.92833 | ---                                                                                                                                 | ---           |  |
| 1459150_at   | 1.07030 | Leucine-rich repeats and calponin homology (CH) domain containing 1                                                                 | Lrch1         |  |
| 1459151_x_at | 1.05737 | interferon-induced protein 35                                                                                                       | Ifi35         |  |
| 1459152_at   | 1.02068 | expressed sequence C78515                                                                                                           | C78515        |  |

|              |         |                                                                              |               |          |
|--------------|---------|------------------------------------------------------------------------------|---------------|----------|
| 1459153_at   | 1.04897 | stonin 2                                                                     | Ston2         |          |
| 1459154_at   | 1.65937 | Transcribed locus                                                            | ---           |          |
| 1459155_at   | 1.00569 | expressed sequence                                                           | AU015696      | AU015696 |
| 1459156_at   | 1.03472 | ---                                                                          | ---           |          |
| 1459157_at   | 1.17226 | Storkhead box 2                                                              | Stox2         |          |
| 1459158_at   | 0.87778 | ---                                                                          | ---           |          |
| 1459159_a_at | 1.01522 | coiled-coil domain containing 6                                              | Ccdc6         |          |
| 1459160_at   | 1.08314 | "Gene model 879, (NCBI)"                                                     | Gm879         |          |
| 1459161_at   | 0.97618 | expressed sequence                                                           | AU015777      | AU015777 |
| 1459162_at   | 0.91479 | Zinc finger protein 644                                                      | Zfp644        |          |
| 1459163_at   | 0.90557 | ---                                                                          | ---           |          |
| 1459164_at   | 1.05270 | expressed sequence                                                           | AU014678      | AU014678 |
| 1459165_at   | 0.90962 | "DNA segment, Chr 4, ERATO Doi 179, expressed"                               | D4Erttd179e   |          |
| 1459166_at   | 0.98665 | ---                                                                          | ---           |          |
| 1459167_at   | 1.13866 | Cdc42 binding protein kinase beta                                            | Cdc42bpb      |          |
| 1459168_at   | 1.01110 | Zinc finger protein 521                                                      | Zfp521        |          |
| 1459169_at   | 0.90976 | "Coronin, actin binding protein 1C"                                          | Coro1c        |          |
| 1459170_at   | 1.06504 | Forkhead box O1                                                              | Foxo1         |          |
| 1459171_at   | 1.03416 | Epithelial membrane protein 1                                                | Emp1          |          |
| 1459172_at   | 0.97249 | ---                                                                          | ---           |          |
| 1459173_at   | 0.97729 | "protein tyrosine phosphatase, receptor type, D"                             | Ptprd         |          |
| 1459174_at   | 1.02184 | ---                                                                          | ---           |          |
| 1459175_at   | 1.09530 | Transcribed locus                                                            | ---           |          |
| 1459176_at   | 1.06795 | ---                                                                          | ---           |          |
| 1459177_at   | 1.02086 | expressed sequence                                                           | AU015741      | AU015741 |
| 1459178_at   | 1.02164 | "DNA segment, Chr 8, ERATO Doi 503, expressed"                               | D8Erttd503e   |          |
| 1459179_at   | 1.01926 | "DNA segment, Chr 8, ERATO Doi 268, expressed"                               | D8Erttd268e   |          |
| 1459180_at   | 1.02724 | Transcribed locus                                                            | ---           |          |
| 1459181_at   | 1.02787 | "PREDICTED: Mus musculus similar to Tubulin alpha-1 chain (LOC629601), mRNA" | ---           |          |
| 1459182_at   | 1.00131 | Transcribed locus                                                            | ---           |          |
| 1459183_at   | 1.01720 | "PREDICTED: Mus musculus similar to C05G5.5 (LOC230628), mRNA"               | ---           |          |
| 1459184_at   | 0.92606 | ---                                                                          | ---           |          |
| 1459185_at   | 1.56710 | Nuclear protein in the AT region                                             | Npat          |          |
| 1459186_at   | 1.00528 | expressed sequence                                                           | C80165        | C80165   |
| 1459187_at   | 1.15949 | "ST3 beta-galactoside alpha-2,3-sialyltransferase 4"                         | St3gal4       |          |
| 1459188_at   | 0.95081 | Receptor-like tyrosine kinase                                                | Ryk           |          |
| 1459189_at   | 0.95377 | RIKEN cDNA 2610037D02 gene                                                   | 2610037D02Rik |          |
| 1459190_at   | 1.16916 | "DNA segment, Chr 3, ERATO Doi 258, expressed"                               | D3Erttd258e   |          |
| 1459191_at   | 0.99249 | RIKEN cDNA B130020M22 gene                                                   | B130020M22Rik |          |
| 1459192_at   | 0.97448 | Transcribed locus                                                            | ---           |          |
| 1459193_at   | 0.96234 | RAD51-like 1 (S. cerevisiae)                                                 | Rad5111       |          |
| 1459194_at   | 0.99762 | RIKEN cDNA 2210408I21 gene                                                   | 2210408I21Rik |          |

|              |         |                                                                                                                                      |               |  |
|--------------|---------|--------------------------------------------------------------------------------------------------------------------------------------|---------------|--|
| 1459195_at   | 1.02892 | ---                                                                                                                                  | ---           |  |
| 1459196_at   | 1.13398 | Dynamin binding protein                                                                                                              | Dnmbp         |  |
| 1459197_at   | 1.01256 | ---                                                                                                                                  | ---           |  |
| 1459198_at   | 1.02095 | "DNA segment, Chr 4, ERATO Doi 199, expressed"                                                                                       | D4Ertd199e    |  |
| 1459199_at   | 1.00496 | ---                                                                                                                                  | ---           |  |
| 1459200_at   | 0.97024 | ---                                                                                                                                  | ---           |  |
| 1459201_at   | 1.01949 | ---                                                                                                                                  | ---           |  |
| 1459202_at   | 0.95796 | ---                                                                                                                                  | ---           |  |
| 1459203_at   | 1.14462 | importin 8                                                                                                                           | Ipo8          |  |
| 1459204_at   | 0.89720 | expressed sequence AU015449                                                                                                          | AU015449      |  |
| 1459205_at   | 1.01911 | Cytoplasmic polyadenylation element binding protein 1                                                                                | Cpeb1         |  |
| 1459206_at   | 0.89324 | ---                                                                                                                                  | ---           |  |
| 1459207_at   | 1.08453 | Transcribed locus                                                                                                                    | ---           |  |
| 1459208_at   | 0.95346 | expressed sequence AU021889                                                                                                          | AU021889      |  |
| 1459209_at   | 0.97209 | Ring finger protein 10                                                                                                               | Rnf10         |  |
| 1459210_at   | 0.97183 | transmembrane protein 108                                                                                                            | Tmem108       |  |
| 1459211_at   | 0.67321 | GLI-Kruppel family member GLI2                                                                                                       | Gli2          |  |
| 1459212_at   | 1.00920 | anaphase promoting complex subunit 11 homolog (yeast)                                                                                | Anapc11       |  |
| 1459213_at   | 1.00991 | "Adult male aorta and vein cDNA, RIKEN full-length enriched library, clone: A530096K17 product:unclassifiable, full insert sequence" | ---           |  |
| 1459214_at   | 1.07939 | Odd Oz/ten-m homolog 2 (Drosophila)                                                                                                  | Odz2          |  |
| 1459215_at   | 0.99375 | Lysosomal-associated protein transmembrane 4B                                                                                        | Laptm4b       |  |
| 1459216_at   | 1.35666 | Tudor domain containing 7                                                                                                            | Tdrd7         |  |
| 1459217_at   | 1.00225 | oncostatin M receptor                                                                                                                | Osmr          |  |
| 1459218_at   | 1.51850 | RIKEN cDNA D330001F17 gene                                                                                                           | D330001F17Rik |  |
| 1459219_at   | 1.62915 | ---                                                                                                                                  | ---           |  |
| 1459220_at   | 0.93218 | expressed sequence C78651                                                                                                            | C78651        |  |
| 1459221_at   | 1.03193 | ---                                                                                                                                  | ---           |  |
| 1459222_x_at | 0.98922 | ---                                                                                                                                  | ---           |  |
| 1459223_at   | 0.98006 | RIKEN cDNA B930095G15 gene                                                                                                           | B930095G15Rik |  |
| 1459224_at   | 1.08501 | "Protein phosphatase 1, regulatory (inhibitor) subunit 13B"                                                                          | Ppp1r13b      |  |
| 1459225_at   | 1.10935 | ---                                                                                                                                  | ---           |  |
| 1459226_at   | 1.07162 | Transcribed locus                                                                                                                    | ---           |  |
| 1459227_at   | 0.88628 | Transcribed locus                                                                                                                    | ---           |  |
| 1459228_at   | 1.03941 | mirror-image polydactyly gene 1 homolog (human)                                                                                      | Mipol1        |  |
| 1459229_at   | 0.94868 | "7 days neonate cerebellum cDNA, RIKEN full-length enriched library, clone: A730008E08 product:unclassifiable, full insert sequence" | ---           |  |
| 1459230_at   | 0.93243 | RIKEN cDNA B430319G15 gene                                                                                                           | D530025C14Rik |  |
| 1459231_at   | 1.16261 | protein kinase N1                                                                                                                    | Pkn1          |  |
| 1459232_at   | 0.89656 | ---                                                                                                                                  | ---           |  |
| 1459233_at   | 1.16895 | CLIP associating protein 1                                                                                                           | Clasp1        |  |
| 1459234_at   | 0.77422 | Arachidonate 5-lipoxygenase activating protein                                                                                       | Alox5ap       |  |
| 1459235_at   | 0.98163 | ---                                                                                                                                  | ---           |  |

|              |         |                                                                            |                             |
|--------------|---------|----------------------------------------------------------------------------|-----------------------------|
| 1459236_at   | 0.95414 | expressed sequence AU022436                                                | AU022436                    |
| 1459237_at   | 1.74938 | Activating transcription factor 2                                          | Atf2                        |
| 1459238_at   | 1.22760 | ---                                                                        | ---                         |
| 1459239_at   | 1.02809 | Activating signal cointegrator 1 complex subunit 3                         | Ascc3                       |
| 1459240_at   | 1.19254 | Transcription factor 25 (basic helix-loop-helix)                           | Tcf25                       |
| 1459241_at   | 0.94639 | Transcribed locus                                                          | ---                         |
| 1459242_at   | 1.07128 | "ELOVL family member 5, elongation of long chain fatty acids (yeast)"      | Elov15                      |
| 1459243_at   | 1.11211 | "PREDICTED: Mus musculus hypothetical protein LOC626097 (LOC626097), mRNA" | ---                         |
| 1459244_at   | 0.96738 | expressed sequence AU014756                                                | AU014756                    |
| 1459245_s_at | 1.17401 | "glutamate receptor, ionotropic, delta 2"                                  | Grid2                       |
| 1459246_at   | 0.99150 | RIKEN cDNA D230021J17 gene                                                 | D230021J17Rik               |
| 1459247_at   | 0.99728 | ATP/GTP binding protein-like 3                                             | Agbl3                       |
| 1459248_at   | 1.00997 | "Protein tyrosine phosphatase, non-receptor type 9"                        | Ptpn9                       |
| 1459249_at   | 1.00406 | Tudor domain containing 3                                                  | Tdrd3                       |
| 1459250_at   | 0.93827 | teashirt zinc finger family member 2                                       | Tshz2                       |
| 1459251_at   | 1.14814 | RIKEN cDNA A430088I17 gene                                                 | A430088I17Rik               |
| 1459252_at   | 0.95335 | "similar to double homeobox, 4"                                            | LOC245263                   |
| 1459253_at   | 0.93956 | ---                                                                        | ---                         |
| 1459254_at   | 0.97765 | cell division cycle associated 2                                           | Cdca2                       |
| 1459255_at   | 0.99591 | RIKEN cDNA 1700034P13 gene                                                 | 1700034P13Rik               |
| 1459256_at   | 0.98501 | Neuropilin 2                                                               | Nrp2                        |
| 1459257_at   | 1.01775 | RIKEN cDNA A230048G03 gene                                                 | A230048G03Rik               |
| 1459258_at   | 1.34570 | RIKEN cDNA 2610021K21 gene                                                 | 2610021K21Rik               |
| 1459259_at   | 1.06671 | hypothetical protein A030007L22                                            | A030007L22                  |
| 1459260_at   | 0.99970 | ---                                                                        | ---                         |
| 1459261_at   | 0.92641 | SRY-box containing gene 5                                                  | Sox5                        |
| 1459262_at   | 1.04795 | MTERF domain containing 1                                                  | Mterfd1                     |
| 1459263_at   | 0.96913 | ---                                                                        | ---                         |
| 1459264_at   | 0.99614 | tripartite motif protein 33 /// RIKEN cDNA 8030451N04 gene                 | Trim33 ///<br>8030451N04Rik |
| 1459265_at   | 0.94679 | myosin head domain containing 1                                            | Myohd1                      |
| 1459266_at   | 1.24182 | ---                                                                        | ---                         |
| 1459267_at   | 0.85121 | RIKEN cDNA 2310033P09 gene                                                 | 2310033P09Rik               |
| 1459268_at   | 1.03154 | RIKEN cDNA 5330439C02 gene                                                 | 5330439C02Rik               |
| 1459269_at   | 0.89790 | RIKEN cDNA 2310014G06 gene                                                 | 2310014G06Rik               |
| 1459270_at   | 1.07265 | "ATP-binding cassette, sub-family C (CFTR/MRP), member 1"                  | Abcc1                       |
| 1459271_at   | 1.09528 | Transcribed locus                                                          | ---                         |
| 1459272_at   | 1.01423 | Pellino 1                                                                  | Peli1                       |
| 1459273_at   | 1.01504 | ---                                                                        | ---                         |
| 1459274_at   | 0.99876 | G protein-coupled receptor 135                                             | Gpr135                      |
| 1459275_at   | 0.87965 | ring finger protein 17                                                     | Rnf17                       |
| 1459276_at   | 1.05007 | RIKEN cDNA A530088E08 gene                                                 | A530088E08Rik               |



|            |                                                                                                     |               |
|------------|-----------------------------------------------------------------------------------------------------|---------------|
| 1459277_at | 0.98512 Nuclear receptor coactivator 1                                                              | Ncoa1         |
| 1459278_at | 1.11178 "FYVE, RhoGEF and PH domain containing 1"                                                   | Fgd1          |
| 1459279_at | 0.92536 Dedicator of cytokinesis 4                                                                  | Dock4         |
| 1459280_at | 0.96971 "DNA segment, Chr 1, ERATO Doi 185, expressed"                                              | D1Erttd185e   |
| 1459281_at | 0.98679 Neuropeptide Y receptor Y2                                                                  | Npy2r         |
| 1459282_at | 0.82825 --- ---                                                                                     |               |
| 1459283_at | 1.51370 RIKEN cDNA 6430510B20 gene                                                                  | 6430510B20Rik |
| 1459284_at | 0.89897 Transcribed locus                                                                           | ---           |
| 1459285_at | 0.96217 --- ---                                                                                     |               |
| 1459286_at | 1.08835 Transcribed locus                                                                           | ---           |
| 1459287_at | 0.86541 WD repeat and FYVE domain containing 3                                                      | Wdfy3         |
| 1459288_at | 0.89620 "Potassium voltage-gated channel, Shal-related family, member 2"                            | Kcnd2         |
| 1459289_at | 1.16446 "Phosphodiesterase 4D, cAMP specific"                                                       | Pde4d         |
| 1459290_at | 1.12610 RIKEN cDNA C030015D19 gene                                                                  | C030015D19Rik |
| 1459291_at | 0.94991 "zinc binding alcohol dehydrogenase, domain containing 1"                                   | Zadh1         |
| 1459292_at | 1.09601 Mitogen activated protein kinase kinase 6                                                   | Map2k6        |
| 1459293_at | 0.99298 RIKEN cDNA C030038J10 gene                                                                  | C030038J10Rik |
| 1459294_at | 1.05173 mitochondrial intermediate peptidase                                                        | Mipep         |
| 1459295_at | 1.05809 Latrophilin 3                                                                               | Lphn3         |
| 1459296_at | 1.08578 ubiquitin-conjugating enzyme E2Z (putative)                                                 | Ube2z         |
| 1459297_at | 1.09266 CDC91 cell division cycle 91-like 1 (S. cerevisiae)                                         | Cdc9111       |
| 1459298_at | 1.06796 --- ---                                                                                     |               |
| 1459299_at | 0.90070 myosin IIIB                                                                                 | Myo3b         |
| 1459300_at | 1.11737 Transcribed locus                                                                           | ---           |
| 1459301_at | 1.07457 Myeloid ecotropic viral integration site-related gene 1                                     | Mrg1          |
| 1459302_at | 1.22551 RIKEN cDNA A030007N12 gene                                                                  | A030007N12Rik |
| 1459303_at | 0.85176 Glycoprotein m6a                                                                            | Gpm6a         |
| 1459304_at | 1.01368 RIKEN cDNA A730054J21 gene                                                                  | A730054J21Rik |
| 1459305_at | 1.21258 Retinoic acid induced 17                                                                    | Rai17         |
| 1459306_at | 1.01668 "Beaded filament structural protein 2, phakinin"                                            | Bfsp2         |
| 1459307_at | 1.57939 "SEC24 related gene family, member B (S. cerevisiae)"                                       | Sec24b        |
| 1459308_at | 0.87827 "Potassium intermediate/small conductance calcium-activated channel, subfamily N, member 3" | Kcnn3         |
| 1459309_at | 0.97262 RUN and FYVE domain containing 3                                                            | Rufy3         |
| 1459310_at | 0.98398 RIKEN cDNA 5330434G04 gene                                                                  | 5330434G04Rik |
| 1459311_at | 0.95702 "phosphodiesterase 4D, cAMP specific"                                                       | Pde4d         |
| 1459312_at | 1.02229 Transcribed locus                                                                           | ---           |
| 1459313_at | 0.96950 Transcribed locus                                                                           | ---           |
| 1459314_at | 1.07128 CDK5 regulatory subunit associated protein 1-like 1                                         | Cdkal1        |
| 1459315_at | 1.27196 --- ---                                                                                     |               |
| 1459316_at | 1.82864 RIKEN cDNA 2900026A02 gene                                                                  | 2900026A02Rik |
| 1459317_at | 0.98655 "ankyrin 2, brain"                                                                          | Ank2          |
| 1459318_at | 1.15733 "sema domain, transmembrane domain (TM), and cytoplasmic domain,                            |               |

| (semaphorin) 6D" | Sema6d  |                                                                                                                                      |               |
|------------------|---------|--------------------------------------------------------------------------------------------------------------------------------------|---------------|
| 1459319_at       | 0.91417 | "Polymerase (DNA directed), alpha 1"                                                                                                 | Pola1         |
| 1459320_at       | 1.08215 | Transcribed locus                                                                                                                    | ---           |
| 1459321_at       | 0.98664 | ---                                                                                                                                  | ---           |
| 1459322_at       | 1.75352 | Synaptic nuclear envelope 2                                                                                                          | Syne2         |
| 1459323_at       | 0.87143 | RIKEN cDNA 1700106N22 gene                                                                                                           | 1700106N22Rik |
| 1459324_at       | 1.02885 | ---                                                                                                                                  | ---           |
| 1459325_at       | 0.92082 | "7 days neonate cerebellum cDNA, RIKEN full-length enriched library, clone: A730031J22 product:unclassifiable, full insert sequence" | ---           |
| 1459326_at       | 1.05172 | "DNA segment, Chr 9, ERATO Doi 256, expressed"                                                                                       | D9Ertd256e    |
| 1459327_at       | 1.05670 | RIKEN cDNA 4931406I20 gene                                                                                                           | 4931406I20Rik |
| 1459328_at       | 1.29964 | RIKEN cDNA 4930429A22 gene                                                                                                           | 4930429A22Rik |
| 1459329_at       | 1.04351 | tetratricopeptide repeat domain 7                                                                                                    | Ttc7          |
| 1459330_at       | 0.99186 | Ribosomal protein L31                                                                                                                | Rpl31         |
| 1459331_at       | 0.94462 | surfeit gene 6                                                                                                                       | Surf6         |
| 1459332_at       | 1.05055 | itchy                                                                                                                                | Itch          |
| 1459333_at       | 1.06890 | Transcribed locus                                                                                                                    | ---           |
| 1459334_at       | 0.98613 | ---                                                                                                                                  | ---           |
| 1459335_at       | 0.97924 | ---                                                                                                                                  | ---           |
| 1459336_at       | 1.02594 | "Guanylate cyclase 1, soluble, alpha 2"                                                                                              | Gucy1a2       |
| 1459337_at       | 0.98160 | "asparagine-linked glycosylation 6 homolog (yeast, alpha-1,3,-glucosyltransferase)"                                                  | Alg6          |
| 1459338_at       | 1.15025 | Autism susceptibility candidate 2                                                                                                    | Auts2         |
| 1459339_at       | 0.80954 | RIKEN cDNA 1700049G17 gene                                                                                                           | 1700049G17Rik |
| 1459340_at       | 0.95052 | ---                                                                                                                                  | ---           |
| 1459341_at       | 1.27169 | RIKEN cDNA 8030448K23 gene                                                                                                           | 8030448K23Rik |
| 1459342_at       | 0.96516 | hypothetical protein C230029M16                                                                                                      | C230029M16    |
| 1459343_at       | 0.99682 | RIKEN cDNA 2700008B19 gene                                                                                                           | 2700008B19Rik |
| 1459344_at       | 1.13076 | RIKEN cDNA 9630019E01 gene                                                                                                           | 9630019E01Rik |
| 1459345_at       | 0.91289 | ---                                                                                                                                  | ---           |
| 1459346_at       | 1.09660 | "tRNA splicing endonuclease 2 homolog (SEN2, S. cerevisiae)"                                                                         | Tsen2         |
| 1459347_at       | 0.92142 | ---                                                                                                                                  | ---           |
| 1459348_at       | 1.07016 | Early B-cell factor 1                                                                                                                | Ebf1          |
| 1459349_at       | 0.75863 | RIKEN cDNA A930011G23 gene                                                                                                           | A930011G23Rik |
| 1459350_at       | 1.08882 | Suppressor of cytokine signaling 6                                                                                                   | Socs6         |
| 1459351_at       | 1.04326 | "adrenergic receptor, alpha 1a"                                                                                                      | Adra1a        |
| 1459352_at       | 0.94275 | RIKEN cDNA 2410003P15 gene                                                                                                           | 2410003P15Rik |
| 1459353_at       | 1.20125 | potassium channel tetramerisation domain containing 3                                                                                | Kctd3         |
| 1459354_at       | 1.17910 | "ST3 beta-galactoside alpha-2,3-sialyltransferase 6"                                                                                 | St3gal6       |
| 1459355_at       | 0.94532 | "Transforming growth factor, beta receptor III"                                                                                      | Tgfbr3        |
| 1459356_at       | 1.05927 | Dystonin                                                                                                                             | Dst           |
| 1459357_at       | 0.92705 | Neurofascin                                                                                                                          | Nfasc         |
| 1459358_at       | 1.58981 | Plakophilin 2                                                                                                                        | Pkp2          |

1459359\_at 0.97744 "0 day neonate cerebellum cDNA, RIKEN full-length enriched library, clone:  
C230091N23 product:unclassifiable, full insert sequence" ---  
1459360\_at 2.67508 Trans-acting transcription factor 3 Sp3  
1459361\_at 1.08335 --- ---  
1459362\_at 1.08749 Transcribed locus ---  
1459363\_at 1.26279 Ataxin 2 Atxn2  
1459364\_at 1.01817 RIKEN cDNA C230094A16 gene C230094A16Rik  
1459365\_at 1.00316 RIKEN cDNA 4930429A22 gene 4930429A22Rik  
1459366\_at 0.96146 "RGM domain family, member B" Rgmb  
1459367\_at 1.00459 "Transient receptor potential cation channel, subfamily C, member 5" Trpc5  
1459368\_at 1.02521 --- ---  
1459369\_at 1.04300 Eph receptor A6 Epha6  
1459370\_at 0.93046 "Calcium channel, voltage-dependent, gamma subunit 5" Cacng5  
1459371\_at 1.28877 Eukaryotic translation initiation factor 4E Eif4e  
1459372\_at 0.98767 neuronal PAS domain protein 4 Npas4  
1459373\_at 1.14351 Erythrocyte protein band 4.1 Epb4.1  
1459374\_at 1.24087 Diaphanous homolog 3 (Drosophila) Diap3  
1459375\_at 0.91222 Pregnancy-associated plasma protein A Pappa  
1459376\_at 1.05340 Human immunodeficiency virus type I enhancer binding protein 2 Hivep2  
1459377\_at 0.88984 paralemmin 2 Palm2  
1459378\_at 0.98685 "Protein phosphatase 3, catalytic subunit, beta isoform" Ppp3cb  
1459379\_at 1.03248 --- ---  
1459380\_at 1.09709 "transcriptional adaptor 1 (HFI1 homolog, yeast) like" Tada11  
1459381\_at 0.84826 Dachshund 1 (Drosophila) Dach1  
1459382\_at 0.86907 Dedicator of cyto-kinesis 2 Dock2  
1459383\_at 0.99231 Zinc finger protein 52 Zfp52  
1459384\_at 0.96802 DNA methyltransferase 3B Dnmt3b  
1459385\_at 0.95652 calmodulin regulated spectrin-associated protein 1-like 1 Camsap111  
1459386\_at 0.94757 zinc finger protein 709 Zfp709  
1459387\_at 0.87366 microtubule associated serine/threonine kinase family member 4 Mast4  
1459388\_at 1.05847 Deleted in colorectal carcinoma Dcc  
1459389\_at 1.03061 "Centaurin, gamma 2" Centg2  
1459390\_at 1.03709 Transcribed locus ---  
1459391\_at 0.96083 "ATP-binding cassette, sub-family A (ABC1), member 5" Abca5  
1459392\_at 1.07284 PHD finger protein 8 Phf8  
1459393\_at 0.96590 Transcription factor AP-2 beta Tcfap2b  
1459394\_at 1.28542 RIKEN cDNA D130052B06 gene D130052B06Rik  
1459395\_at 0.90466 Transcribed locus ---  
1459396\_at 1.02929 RIKEN cDNA 6030446N20 gene 6030446N20Rik  
1459397\_at 1.06322 ariadne ubiquitin-conjugating enzyme E2 binding protein homolog 1  
(Drosophila) Arih1  
1459398\_at 1.08977 --- ---  
1459399\_at 1.10624 "Solute carrier family 31, member 2" Slc31a2

|                  |           |                                                                    |               |
|------------------|-----------|--------------------------------------------------------------------|---------------|
| 1459400_at       | 1.00265   | RIKEN cDNA A630038E17 gene                                         | A630038E17Rik |
| 1459401_at       | 1.08914   | Similar to zinc finger protein 616                                 | LOC545191     |
| 1459402_at       | 1.02192   | "opioid receptor, mu 1" Oprm1                                      |               |
| 1459403_at       | 1.61514   | low density lipoprotein receptor                                   | Ldlr          |
| 1459404_at       | 1.12506   | RIKEN cDNA 4930583H14 gene                                         | 4930583H14Rik |
| 1459405_at       | 1.26005   | IQ motif containing GTPase activating protein 3                    | Iqgap3        |
| 1459406_at       | 1.00593   | Choline/ethanolaminephosphotransferase 1                           | Cept1         |
| 1459407_at       | 1.05380   | Neurobeachin like 1                                                | Nbeal1        |
| 1459408_at       | 0.90617   | SEC22 vesicle trafficking protein-like A (S. cerevisiae)           | Sec22a        |
| 1459409_at       | 1.99844   | RIKEN cDNA D130073L02 gene                                         | D130073L02Rik |
| 1459410_at       | 0.97709   | hypothetical LOC493582                                             | LOC493582     |
| 1459411_at       | 1.16237   | Serologically defined colon cancer antigen 10                      | Sdccag10      |
| 1459412_at       | 0.88696   | Malignant fibrous histiocyoma amplified sequence 1                 | Mfhas1        |
| 1459413_at       | 1.00577   | Trf (TATA binding protein-related factor)-proximal protein homolog |               |
| (Drosophila)     |           | Trfp                                                               |               |
| 1459414_at       | 1.07504   | WD repeat and FYVE domain containing 3                             | Wdfy3         |
| 1459415_at       | 1.07715   | ---                                                                | ---           |
| 1459416_at       | 1.11412   | B-cell CLL/lymphoma 7A                                             | Bcl7a         |
| 1459417_at       | 1.14972   | Zinc finger protein 609                                            | Zfp609        |
| 1459418_at       | 0.88813   | RIKEN cDNA 2810457I06 gene                                         | 2810457I06Rik |
| 1459419_at       | 1.13675   | ---                                                                | ---           |
| 1459420_at       | 1.21410   | ---                                                                | ---           |
| 1459421_at       | 1.06954   | hexokinase domain containing 1                                     | Hkdc1         |
| 1459422_at       | 0.97358   | ---                                                                | ---           |
| 1459423_at       | 0.99883   | myeloid ecotropic viral integration site 1                         | Meis1         |
| 1459424_at       | 0.79218   | "DNA segment, Chr 3, ERATO Doi 108, expressed"                     | D3Ertd108e    |
| 1459425_at       | 0.89434   | ---                                                                | ---           |
| 1459426_at       | 1.01728   | Sciellin                                                           | Scel          |
| 1459427_at       | 1.01984   | signal transducing adaptor molecule (SH3 domain and ITAM motif) 1  | Stam          |
| 1459428_at       | 0.97339   | expressed sequence C76662                                          | C76662        |
| 1459429_at       | 1.01652   | kinectin 1                                                         | Ktn1          |
| 1459430_at       | 0.97440   | G protein-coupled receptor 158                                     | Gpr158        |
| 1459431_at       | 1.01510   | Nuclear factor I/A                                                 | Nfia          |
| 1459432_at       | 1.00421   | Transcribed locus                                                  | ---           |
| 1459433_at       | 2.05859   | RIKEN cDNA C130051F05 gene                                         | C130051F05Rik |
| 1459434_at       | 1.21608   | "Pyruvate dehydrogenase complex, component X"                      | Pdhx          |
| 1459435_at       | 0.99198   | Transcribed locus                                                  | ---           |
| 1459436_at       | 0.96074   | "Zinc finger, RAN-binding domain containing 3"                     | Zranb3        |
| 1459437_at       | 1.09566   | similar to kinesin-like motor protein C20orf23                     | LOC640536     |
| protein C20orf23 | LOC668880 | LOC670644                                                          | LOC670644     |
| 1459438_at       | 0.92502   | ---                                                                | ---           |
| 1459439_at       | 1.00550   | mitochondrial ribosomal protein S5                                 | Mrps5         |

|              |         |                                                                                                                                   |               |
|--------------|---------|-----------------------------------------------------------------------------------------------------------------------------------|---------------|
| 1459440_at   | 0.95034 | Neuron navigator 3                                                                                                                | Nav3          |
| 1459441_at   | 1.09907 | Odd Oz/ten-m homolog 3 (Drosophila)                                                                                               | Odz3          |
| 1459442_at   | 1.45452 | "Guanine nucleotide binding protein, beta 1"                                                                                      | Gnb1          |
| 1459443_at   | 0.81350 | "Potassium voltage-gated channel, subfamily Q, member 1"                                                                          | Kcnq1         |
| 1459444_at   | 1.17949 | zinc finger protein 91                                                                                                            | Zfp91         |
| 1459445_at   | 0.94255 | ---                                                                                                                               | ---           |
| 1459446_at   | 1.04965 | leucine rich repeat containing 41                                                                                                 | Lrrc41        |
| 1459447_at   | 0.98591 | Transcribed locus                                                                                                                 | ---           |
| 1459448_at   | 1.06361 | cytochrome b5 reductase 2                                                                                                         | Cyb5r2        |
| 1459449_at   | 1.17944 | "CCR4-NOT transcription complex, subunit 4"                                                                                       | Cnot4         |
| 1459450_at   | 1.09510 | Chromodomain helicase DNA binding protein 9                                                                                       | Chd9          |
| 1459451_at   | 1.09673 | ---                                                                                                                               | ---           |
| 1459452_at   | 1.02397 | Transcribed locus                                                                                                                 | ---           |
| 1459453_at   | 0.96872 | Roundabout homolog 1 (Drosophila)                                                                                                 | Robo1         |
| 1459454_at   | 1.05718 | SAP30 binding protein                                                                                                             | Sap30bp       |
| 1459455_at   | 0.90803 | "Arginine-rich, mutated in early stage tumors"                                                                                    | Armet         |
| 1459456_at   | 0.99511 | RIKEN cDNA 0610011L14 gene                                                                                                        | 0610011L14Rik |
| 1459457_at   | 1.22509 | "calcium/calmodulin-dependent protein kinase II, delta"                                                                           | Camk2d        |
| 1459458_at   | 1.01100 | "DNA segment, Chr 9, ERATO Doi 338, expressed"                                                                                    | D9Ertd338e    |
| 1459459_at   | 1.01845 | "Protein tyrosine phosphatase, non-receptor type 12"                                                                              | Ptpn12        |
| 1459460_at   | 1.07091 | ---                                                                                                                               | ---           |
| 1459461_at   | 1.85283 | ---                                                                                                                               | ---           |
| 1459462_at   | 1.22686 | Glucocorticoid induced gene 1                                                                                                     | Gig1          |
| 1459463_at   | 1.07123 | "Adult male spinal cord cDNA, RIKEN full-length enriched library, clone: A330073N09 product:unclassifiable, full insert sequence" | ---           |
| 1459464_at   | 1.15562 | Transcribed locus                                                                                                                 | ---           |
| 1459465_at   | 1.04767 | RIKEN cDNA 9630020C08 gene                                                                                                        | 9630020C08Rik |
| 1459466_at   | 1.05244 | ---                                                                                                                               | ---           |
| 1459467_at   | 1.04193 | expressed sequence AA986715                                                                                                       | AA986715      |
| 1459468_at   | 1.02603 | expressed sequence C79743                                                                                                         | C79743        |
| 1459469_at   | 1.06846 | expressed sequence C78516                                                                                                         | C78516        |
| 1459470_at   | 1.57238 | Runt related transcription factor 1                                                                                               | Runx1         |
| 1459471_at   | 0.96273 | ---                                                                                                                               | ---           |
| 1459472_at   | 0.95076 | ---                                                                                                                               | ---           |
| 1459473_at   | 0.97032 | "Prenyl (solanesyl) diphosphate synthase, subunit 2"                                                                              | Pdss2         |
| 1459474_at   | 0.96553 | "DNA segment, Chr 1, ERATO Doi 86, expressed"                                                                                     | D1Ertd86e     |
| 1459475_at   | 1.08217 | "DNA segment, Chr 10, ERATO Doi 761, expressed"                                                                                   | D10Ertd761e   |
| 1459476_s_at | 1.10286 | cysteine and glycine-rich protein 2 binding protein                                                                               | Csrp2bp       |
| 1459477_at   | 1.04986 | Gamma-aminobutyric acid (GABA-A) receptor-associated protein-like 2                                                               | Gabarapl2     |
| 1459478_at   | 0.98384 | expressed sequence AA408396                                                                                                       | AA408396      |
| 1459479_at   | 1.02372 | "PREDICTED: Mus musculus similar to Uridine 5-monophosphate synthase (UMP synthase) (LOC628594), mRNA"                            | ---           |

|            |         |                                                                                                                                       |               |
|------------|---------|---------------------------------------------------------------------------------------------------------------------------------------|---------------|
| 1459480_at | 0.97794 | "DNA segment, Chr 6, ERATO Doi 90, expressed"                                                                                         | D6Ertd90e     |
| 1459481_at | 1.06776 | Protocadherin 11 X-linked                                                                                                             | Pcdh11x       |
| 1459482_at | 1.07259 | "transient receptor potential cation channel, subfamily M, member 2"                                                                  | Trpm2         |
| 1459483_at | 0.93533 | Transmembrane protein 28                                                                                                              | Tmem28        |
| 1459484_at | 1.01579 | Transmembrane protein 2                                                                                                               | Tmem2         |
| 1459485_at | 1.54807 | Neogenin                                                                                                                              | Neo1          |
| 1459486_at | 1.06537 | expressed sequence AU022240                                                                                                           | AU022240      |
| 1459487_at | 1.27641 | RIKEN cDNA 4930554I06 gene                                                                                                            | 4930554I06Rik |
| 1459488_at | 1.51797 | RIKEN cDNA 3110050K21 gene                                                                                                            | 3110050K21Rik |
| 1459489_at | 0.92033 | ---                                                                                                                                   | ---           |
| 1459490_at | 0.99616 | RIKEN cDNA 1110032E23 gene                                                                                                            | 1110032E23Rik |
| 1459491_at | 1.02609 | "DNA segment, Chr 12, ERATO Doi 673, expressed"                                                                                       | D12Ertd673e   |
| 1459492_at | 0.96726 | ---                                                                                                                                   | ---           |
| 1459493_at | 0.96128 | SET binding protein 1                                                                                                                 | Setbp1        |
| 1459494_at | 0.98520 | "Rabaptin, RAB GTPase binding effector protein 1"                                                                                     | Rabep1        |
| 1459495_at | 1.13929 | Transmembrane protein 16A                                                                                                             | Tmem16a       |
| 1459496_at | 0.87951 | expressed sequence C77267                                                                                                             | C77267        |
| 1459497_at | 1.71704 | Farnesyl diphosphate farnesyl transferase 1                                                                                           | Fdft1         |
| 1459498_at | 1.04922 | ---                                                                                                                                   | ---           |
| 1459499_at | 1.00160 | Transcribed locus                                                                                                                     | ---           |
| 1459500_at | 1.08962 | expressed sequence C85351                                                                                                             | C85351        |
| 1459501_at | 0.91432 | expressed sequence AU022194                                                                                                           | AU022194      |
| 1459502_at | 1.05508 | "DNA segment, Chr 17, ERATO Doi 589, expressed"                                                                                       | D17Ertd589e   |
| 1459503_at | 0.95806 | "10 days neonate cerebellum cDNA, RIKEN full-length enriched library, clone: B930063G06 product:unclassifiable, full insert sequence" | ---           |
| 1459504_at | 1.10110 | expressed sequence AU022121                                                                                                           | AU022121      |
| 1459505_at | 0.85424 | ---                                                                                                                                   | ---           |
| 1459506_at | 0.96206 | ---                                                                                                                                   | ---           |
| 1459507_at | 0.90809 | ---                                                                                                                                   | ---           |
| 1459508_at | 0.99166 | expressed sequence C85600                                                                                                             | C85600        |
| 1459509_at | 1.13212 | Mortality factor 4 like 1                                                                                                             | Morf4l1       |
| 1459510_at | 0.97987 | "transmembrane protease, serine 2"                                                                                                    | Tmprss2       |
| 1459511_at | 1.01798 | RIKEN cDNA 3110004L20 gene                                                                                                            | 3110004L20Rik |
| 1459512_at | 1.06601 | Myeloid ecotropic viral integration site 1                                                                                            | Meis1         |
| 1459513_at | 0.96722 | ---                                                                                                                                   | ---           |
| 1459514_at | 1.03924 | ---                                                                                                                                   | ---           |
| 1459515_at | 1.01596 | RIKEN cDNA 2610037D02 gene                                                                                                            | 2610037D02Rik |
| 1459516_at | 1.19268 | Cullin 1                                                                                                                              | Cul1          |
| 1459517_at | 1.08821 | CDC14 cell division cycle 14 homolog A (S. cerevisiae)                                                                                | Cdc14a        |
| 1459518_at | 0.85329 | "Gene model 489, (NCBI)"                                                                                                              | Gm489         |
| 1459519_at | 0.81563 | ---                                                                                                                                   | ---           |
| 1459520_at | 0.98265 | ---                                                                                                                                   | ---           |
| 1459521_at | 0.91200 | ---                                                                                                                                   | ---           |

1459522\_s\_at 0.92642 glycogenin Gyg  
1459523\_at 0.97465 expressed sequence C85403 C85403  
1459524\_at 0.91256 mutated in colorectal cancers Mcc  
1459525\_at 1.06350 Calcium binding atopy-related autoantigen 1 Cbara1  
1459526\_at 0.99695 Trinucleotide repeat containing 6a Tnrc6a  
1459527\_at 0.84763 --- ---  
1459528\_at 1.07085 --- ---  
1459529\_at 1.16147 RIKEN cDNA E230016K23 gene E230016K23Rik  
1459530\_at 1.61713 Hydroxysteroid (17-beta) dehydrogenase 12 Hsd17b12  
1459531\_at 1.02731 Lemur tyrosine kinase 2 Lmtk2  
1459532\_at 0.91817 "glutamate receptor, metabotropic 7" Grm7  
1459533\_at 0.95615 "DNA segment, Chr 19, ERATO Doi 79, expressed" D19Ert79e  
1459534\_at 0.92539 "Adult retina cDNA, RIKEN full-length enriched library, clone:A930028F22  
product:unclassifiable, full insert sequence" ---  
1459535\_at 0.92986 Cadherin 13 Cdh13  
1459536\_at 1.24436 Calcitonin receptor-like Calcr1  
1459537\_at 1.13267 RIKEN cDNA 4631427C17 gene 4631427C17Rik  
1459538\_at 1.03787 CDNA sequence BC050092 BC050092  
1459539\_at 1.02213 --- ---  
1459540\_at 0.98871 Cell division cycle 26 Cdc26  
1459541\_at 0.91289 --- ---  
1459542\_at 1.01191 --- ---  
1459543\_at 1.13556 expressed sequence AA407787 AA407787  
1459544\_at 0.94929 --- ---  
1459545\_at 1.03923 --- ---  
1459546\_s\_at 0.77177 ectonucleotide pyrophosphatase/phosphodiesterase 1 Enpp1  
1459547\_at 1.08999 Transcribed locus ---  
1459548\_at 0.98239 spire homolog 1 (Drosophila) Spire1  
1459549\_at 0.95417 DPH5 homolog (S. cerevisiae) Dph5  
1459550\_at 1.01666 Synapsin III Syn3  
1459551\_at 0.95960 --- ---  
1459552\_at 0.99903 Transcribed locus ---  
1459553\_at 1.01229 --- ---  
1459554\_at 0.99040 --- ---  
1459555\_at 0.82217 --- ---  
1459556\_at 0.97983 CDNA sequence BC013481 BC013481  
1459557\_at 1.08983 Zinc finger and BTB domain containing 16 Zbtb16  
1459558\_at 1.05872 Microtubule associated serine/threonine kinase 2 Mast2  
1459559\_at 1.09043 --- ---  
1459560\_at 2.16733 RIKEN cDNA 4921517N04 gene 4921517N04Rik  
1459561\_at 1.08140 --- ---  
1459562\_at 0.91369 --- ---  
1459563\_x\_at 0.89919 Transcribed locus ---

|              |         |                                                                        |               |
|--------------|---------|------------------------------------------------------------------------|---------------|
| 1459564_at   | 1.03511 | expressed sequence C87580                                              | C87580        |
| 1459565_at   | 1.04320 | "ubiquitously transcribed tetratricopeptide repeat gene, Y chromosome" | Uty           |
| 1459566_at   | 1.07287 | Regulator of G-protein signaling 12                                    | Rgs12         |
| 1459567_at   | 0.85381 | expressed sequence C77905                                              | C77905        |
| 1459568_at   | 1.27981 | Transmembrane and tetratricopeptide repeat containing 4                | Tmtc4         |
| 1459569_at   | 0.91876 | Transcribed locus                                                      | ---           |
| 1459570_at   | 0.91625 | G protein-coupled receptor 143                                         | Gpr143        |
| 1459571_at   | 1.21597 | SH3-binding domain glutamic acid-rich protein like                     | Sh3bgrl       |
| 1459572_at   | 1.04148 | expressed sequence C86371                                              | C86371        |
| 1459573_at   | 1.07713 | brix domain containing 5                                               | Bxdc5         |
| 1459574_at   | 1.07374 | expressed sequence C86865                                              | C86865        |
| 1459575_at   | 1.21548 | "DNA segment, Chr 1, ERATO Doi 704, expressed"                         | D1ErtD704e    |
| 1459576_at   | 0.99744 | ---                                                                    | ---           |
| 1459577_at   | 1.05586 | ---                                                                    | ---           |
| 1459578_at   | 0.89700 | expressed sequence AA407175                                            | AA407175      |
| 1459579_at   | 0.82722 | ---                                                                    | ---           |
| 1459580_at   | 0.99204 | RIKEN cDNA G630055G22 gene                                             | G630055G22Rik |
| 1459581_at   | 1.08581 | transformation related protein 63                                      | Trp63         |
| 1459582_at   | 1.01033 | ---                                                                    | ---           |
| 1459583_at   | 0.98242 | Glutamate receptor interacting protein 1                               | Grip1         |
| 1459584_at   | 0.96154 | vacuolar protein sorting 24 (yeast)                                    | Vps24         |
| 1459585_at   | 1.16029 | growth arrest specific 6                                               | Gas6          |
| 1459586_at   | 1.00946 | expressed sequence C78452                                              | C78452        |
| 1459587_at   | 1.12685 | RIKEN cDNA 2410015B03 gene                                             | 2410015B03Rik |
| 1459588_at   | 0.94506 | Kit oncogene                                                           | Kit           |
| 1459589_at   | 0.88896 | "crystallin, lamda 1"                                                  | Cryl1         |
| 1459590_at   | 1.00781 | Transcribed locus                                                      | ---           |
| 1459591_at   | 0.96493 | ---                                                                    | ---           |
| 1459592_a_at | 0.87941 | similar to NFkB interacting protein 1                                  | LOC669005     |
| 1459593_x_at | 0.98752 | similar to NFkB interacting protein 1                                  | LOC669005     |
| 1459594_at   | 0.97888 | zinc finger protein 294                                                | Zfp294        |
| 1459595_at   | 1.21665 | Expressed sequence AA516738                                            | AA516738      |
| 1459596_at   | 0.82313 | ---                                                                    | ---           |
| 1459597_at   | 0.96279 | myotrophin                                                             | Mtpn          |
| 1459598_at   | 1.11507 | Hermansky-Pudlak syndrome 1 homolog (human)                            | Hps1          |
| 1459599_at   | 1.06327 | ---                                                                    | ---           |
| 1459600_at   | 0.97265 | "Calcium/calmodulin-dependent protein kinase II, delta"                | Camk2d        |
| 1459601_at   | 1.06181 | SNF1-like kinase                                                       | Snf1lk        |
| 1459602_at   | 0.91824 | cyclin I                                                               | Ccni          |
| 1459603_at   | 1.09909 | RIKEN cDNA C330008K14 gene                                             | C330008K14Rik |
| 1459604_at   | 1.00578 | SNRPN upstream reading frame                                           | Snurf         |
| 1459605_at   | 0.94212 | "amyloid beta (A4) precursor protein binding, family A, member 1"      | Apba1         |
| 1459606_at   | 0.99502 | expressed sequence C79130                                              | C79130        |



1459607\_at 0.93235 RIKEN cDNA 2900001O04 gene 2900001O04Rik  
1459608\_at 1.07888 Tripartite motif protein 24 Trim24  
1459609\_at 1.12904 Rho GTPase activating protein 10 Arhgap10  
1459610\_at 0.98422 expressed sequence C87490 C87490  
1459611\_at 0.94581 "membrane protein, palmitoylated 3 (MAGUK p55 subfamily member 3)"  
Mpp3  
1459612\_at 1.05152 PH domain and leucine rich repeat protein phosphatase Phlpp  
1459613\_at 1.07522 Transcribed locus ---  
1459614\_at 1.13241 "laminin, alpha 5" Lama5  
1459615\_at 1.06294 RIKEN cDNA B130052P14 gene B130052P14Rik  
1459616\_at 1.02544 polo-like kinase 1 (Drosophila) Plk1  
1459617\_at 1.14602 Mitogen activated protein kinase 14 Mapk14  
1459618\_at 1.04750 Three prime repair exonuclease 1 Trex1  
1459619\_at 1.51450 erythrocyte protein band 4.1-like 2 Epb4.112  
1459620\_at 1.04719 RIKEN cDNA 9130004C02 gene 9130004C02Rik  
1459621\_at 0.93598 intersectin 1 (SH3 domain protein 1A) Itsn1  
1459622\_at 0.86708 "gene model 22, (NCBI)" Gm22  
1459623\_at 0.96050 --- ---  
1459624\_at 1.01206 --- ---  
1459625\_at 1.03998 FK506 binding protein 12-rapamycin associated protein 1 Frap1  
1459626\_at 0.88184 Transcribed locus ---  
1459627\_at 1.97076 Sterol-C4-methyl oxidase-like Sc4mol  
1459628\_at 1.01448 "Zinc finger, matrin type 4" Zmat4  
1459629\_at 0.98981 --- ---  
1459630\_at 0.97111 Transcribed locus ---  
1459631\_at 0.95513 ribosomal protein S12 /// similar to ribosomal protein S12 /// similar to  
ribosomal protein S12 /// similar to ribosomal protein S12 /// similar to ribosomal protein S12 /// similar  
to ribosomal protein S12 /// similar to ribosomal protein S12 /// similar to ribosomal protein S12 ///  
similar to ribosomal protein S12 /// similar to ribosomal protein S12 /// similar to ribosomal protein  
S12 /// similar to ribosomal protein S12 /// similar to ribosomal protein S12 /// similar to ribosomal  
protein S12 /// similar to ribosomal protein S12 /// similar to 40S ribosomal protein S12 /// similar to  
ribosomal protein S12 /// similar to ribosomal protein S12 /// similar to ribosomal protein S12 /// similar  
to ribosomal protein S12 Rps12 /// LOC432865 /// LOC434843 /// LOC546371 /// LOC626048 ///  
LOC627835 /// LOC665463 /// LOC665501 /// LOC665522 /// LOC665555 /// LOC665579 ///  
LOC665611 /// LOC668354 /// LOC670751 /// LOC670832 /// LOC671641 /// LOC672008 ///  
LOC672415 /// LOC673522 /// LOC676277  
1459632\_at 3.56592 Cysteine rich transmembrane BMP regulator 1 (chordin like) Crim1  
1459633\_at 1.06510 --- ---  
1459634\_at 0.88737 RIKEN cDNA A230048G03 gene A230048G03Rik  
1459635\_at 1.29393 "Discs, large homolog 1 (Drosophila)" Dlgh1  
1459636\_at 1.14354 Angiopoietin 2 Angpt2  
1459637\_at 1.00563 --- ---  
1459638\_at 0.94202 "Protein tyrosine phosphatase, receptor type, E" Ptpre

1459639\_at 0.95546 BR serine/threonine kinase 2 Brsk2  
1459640\_at 1.02779 --- ---  
1459641\_at 1.00489 "Proteasome (prosome, macropain) subunit, beta type 2" Psmb2  
1459642\_at 1.09781 A disintegrin and metallopeptidase domain 23 Adam23  
1459643\_at 0.91686 Transcribed locus ---  
1459644\_at 0.92947 expressed sequence AU020772 AU020772  
1459645\_at 0.99915 Adenosine kinase Adk  
1459646\_at 0.93266 heparan sulfate (glucosamine) 3-O-sulfotransferase 6 Hs3st6  
1459647\_at 1.12181 "Polymerase (DNA-directed), delta 3, accessory subunit" Pold3  
1459648\_at 1.16726 RUN and TBC1 domain containing 3 Rutbc3  
1459649\_at 1.14286 Transcribed locus ---  
1459650\_at 0.89606 telomeric repeat binding factor 2 Terf2  
1459651\_s\_at 1.04196 nucleoporin 54 Nup54  
1459652\_at 0.93705 expressed sequence C79356 C79356  
1459653\_at 1.02504 --- ---  
1459654\_at 1.01848 --- ---  
1459655\_at 0.98784 --- ---  
1459656\_at 0.90286 "PREDICTED: Mus musculus similar to potassium voltage-gated channel, subfamily G, member 1 isoform 2, transcript variant 2 (LOC241794), mRNA" ---  
1459657\_s\_at 1.05965 RNA polymerase 1-3 Rpo1-3  
1459658\_at 0.88930 --- ---  
1459659\_at 1.02151 "PREDICTED: Mus musculus hypothetical protein LOC623278 (LOC623278), mRNA" ---  
1459660\_at 0.94555 --- ---  
1459661\_at 1.04561 expressed sequence AW492955 AW492955  
1459662\_at 0.98373 "Adult male diencephalon cDNA, RIKEN full-length enriched library, clone:9330197M14 product:unclassifiable, full insert sequence" ---  
1459663\_at 0.98511 --- ---  
1459664\_at 1.10935 WD repeat domain 31 Wdr31  
1459665\_s\_at 1.04938 MRV integration site 1 Mrvi1  
1459666\_at 0.87818 "trafficking protein, kinesin binding 1" Trak1  
1459667\_at 1.34232 Rho GTPase activating protein 17 Arhgap17  
1459668\_at 1.12737 TRAF family member-associated Nf-kappa B activator Tank  
1459669\_at 0.88236 Transcribed locus ---  
1459670\_at 1.37231 Heterogeneous nuclear ribonucleoprotein L-like Hnrpll  
1459671\_at 0.91377 Transcribed locus ---  
1459672\_at 1.10186 Topoisomerase (DNA) I Top1  
1459673\_at 0.97680 general transcription factor III C 1 Gtf3c1  
1459674\_at 1.05622 "Protein kinase C, beta 1" Prkcb1  
1459675\_at 0.90281 --- ---  
1459676\_at 0.98952 tetratricopeptide repeat domain 15 Ttc15  
1459677\_at 1.43208 --- ---  
1459678\_at 1.30164 hypothetical LOC497255 LOC497255

1459679\_s\_at 1.02355 myosin IB Myo1b  
1459680\_at 1.27479 Translocase of outer mitochondrial membrane 40 homolog (yeast) Tomm40  
1459681\_at 0.90692 --- ---  
1459682\_at 0.94996 hypothetical LOC434249 LOC434249  
1459683\_at 1.04506 similar to spermatogenic cell-specific gene 2 LOC218695  
1459684\_at 0.97846 RIKEN cDNA 2810449C10 gene 2810449C10Rik  
1459685\_at 0.99833 expressed sequence C77683 C77683  
1459686\_at 0.89723 --- ---  
1459687\_x\_at 1.06500 Cleavage and polyadenylation specific factor 6 Cpsf6  
1459688\_at 1.20722 Transcribed locus ---  
1459689\_at 1.13710 "Glycerol phosphate dehydrogenase 2, mitochondrial" Gpd2  
1459690\_at 1.14806 --- ---  
1459691\_at 1.10743 --- ---  
1459692\_at 0.92309 expressed sequence AI661323 AI661323  
1459693\_x\_at 0.97039 "3-monooxygenase/tryptophan 5-monooxygenase activation protein, gamma polypeptide" Ywhag  
1459694\_at 0.91741 expressed sequence AI428898 AI428898  
1459695\_at 1.33599 --- ---  
1459696\_at 0.90623 Furry homolog (Drosophila) Fry  
1459697\_at 1.09108 Thyroid adenoma associated Thada  
1459698\_at 1.04442 "Similar to retinoic acid, EGF, and NGF upregulated" LOC622320  
1459699\_at 0.88543 Transcribed locus ---  
1459700\_at 0.96958 LEM domain containing 3 Lemd3  
1459701\_x\_at 1.07713 --- ---  
1459702\_at 1.44487 --- ---  
1459703\_at 1.07487 "DNA segment, Chr 7, ERATO Doi 443, expressed" D7Ertd443e  
1459704\_at 1.06910 "DnaJ (Hsp40) homolog, subfamily C, member 7" Dnajc7  
1459705\_at 0.94982 Olfactomedin 3 Olfm3  
1459706\_at 1.01347 Exocyst complex component 4 Exoc4  
1459707\_at 1.56121 Phosphofurin acidic cluster sorting protein 1 Pacs1  
1459708\_at 0.92135 "Ubiquitination factor E4A, UFD2 homolog (S. cerevisiae)" Ube4a  
1459709\_at 0.93478 --- ---  
1459710\_at 0.98395 Transcribed locus ---  
1459711\_at 0.84914 sidekick homolog 1 (chicken) Sdk1  
1459712\_at 1.02894 zinc finger protein 182 Zfp182  
1459713\_s\_at 0.74383 transmembrane protein 16A Tmem16a  
1459714\_at 0.87741 RIKEN cDNA 6330545A04 gene 6330545A04Rik  
1459715\_at 1.36147 RIKEN cDNA 1500011J06 gene 1500011J06Rik  
1459716\_at 1.01615 expressed sequence AI835735 AI835735  
1459717\_at 1.01259 Olfactory receptor 1344 Olfr1344  
1459718\_x\_at 0.96810 Kruppel-like factor 6 Klf6  
1459719\_at 1.00196 DEP domain containing 6 Depdc6  
1459720\_x\_at 0.91870 --- ---

1459721\_at 1.03297 CDNA clone IMAGE:6406267 ---  
 1459722\_at 2.65200 "Zinc finger, SWIM domain containing 6" Zswim6  
 1459723\_at 0.89876 "zinc finger, DHHC-type containing 22" Zdhhc22  
 1459724\_at 0.82991 "zinc finger, DHHC domain containing 20" Zdhhc20  
 1459725\_s\_at 1.14268 demilune cell and parotid protein /// similar to common salivary protein 1  
 Dcpp /// LOC630537  
 1459726\_at 0.98308 "Protein tyrosine phosphatase, receptor type, N polypeptide 2" Ptprn2  
 1459727\_at 0.92120 expressed sequence AW125646 AW125646  
 1459728\_at 0.97606 RIKEN cDNA 5830446M03 gene 5830446M03Rik  
 1459729\_at 0.98688 "solute carrier family 13 (sodium-dependent citrate transporter), member 5"  
 Slc13a5  
 1459730\_at 1.00823 Transcribed locus ---  
 1459731\_at 0.90999 --- ---  
 1459732\_at 1.01160 Transcribed locus ---  
 1459733\_at 2.24130 Phosphoprotein enriched in astrocytes 15 Pea15  
 1459734\_at 1.65595 "Proteasome (prosome, macropain) 26S subunit, non-ATPase, 14" Psm14  
 1459735\_at 1.09783 RIKEN cDNA C430014M02 gene C430014M02Rik  
 1459736\_at 0.88880 Serine/threonine kinase 10 Stk10  
 1459737\_s\_at 0.87765 transthyretin Ttr  
 1459738\_x\_at 1.06732 --- ---  
 1459739\_at 1.09977 RIKEN cDNA E130308A19 gene E130308A19Rik  
 1459740\_s\_at 0.92718 "uncoupling protein 2 (mitochondrial, proton carrier)" Ucp2  
 1459741\_x\_at 0.94129 "uncoupling protein 2 (mitochondrial, proton carrier)" Ucp2  
 1459742\_at 0.96188 "15 days embryo brain cDNA, RIKEN full-length enriched library, clone:  
 G630032A08 product:unclassifiable, full insert sequence" ---  
 1459743\_at 0.95589 Transcribed locus ---  
 1459744\_at 0.97749 CD53 antigen Cd53  
 1459745\_at 1.10236 Ubiquitin-associated protein 2 Ubap2  
 1459746\_at 2.19075 R3H domain 1 (binds single-stranded nucleic acids) R3hdm1  
 1459747\_at 0.74599 --- ---  
 1459748\_at 0.96039 --- ---  
 1459749\_s\_at 0.74811 FAT tumor suppressor homolog 4 (Drosophila) Fat4  
 1459750\_s\_at 1.02299 G protein-coupled receptor 123 Gpr123  
 1459751\_s\_at 0.94982 "protein phosphatase 1, regulatory (inhibitor) subunit 16A" Ppp1r16a  
 1459752\_at 1.07077 mutated in colorectal cancers Mcc  
 1459753\_x\_at 0.96816 transformer 2 alpha homolog (Drosophila) Tra2a  
 1459754\_x\_at 0.78436 eukaryotic translation elongation factor 1 delta (guanine nucleotide exchange  
 protein) Eef1d  
 1459755\_x\_at 0.95711 RIKEN cDNA 1700082C02 gene 1700082C02Rik  
 1459756\_at 0.92955 "CCR4-NOT transcription complex, subunit 10" Cnot10  
 1459757\_x\_at 0.90618 "CCR4-NOT transcription complex, subunit 10" Cnot10  
 1459758\_at 0.94289 upstream transcription factor 1 Usf1  
 1459759\_s\_at 0.98336 RIKEN cDNA 1700065I17 gene 1700065I17Rik

1459760\_at 0.93813 NADH dehydrogenase (ubiquinone) Fe-S protein 4 Ndufs4  
1459761\_x\_at 0.89220 "immunoglobulin superfamily, member 4" Igsf4d  
1459762\_x\_at 1.05988 WD repeat domain 12 Wdr12  
1459763\_at 1.10154 "Adiponectin, C1Q and collagen domain containing" Adipoq  
1459764\_x\_at 1.44549 Sorting nexin 10 Snx10  
1459765\_s\_at 1.00968 Splicing factor 1 Sf1  
1459766\_x\_at 0.84430 --- ---  
1459767\_x\_at 1.00289 chondroitin sulfate proteoglycan 2 Cspg2  
1459768\_x\_at 1.11647 "RAP1, GTP-GDP dissociation stimulator 1" Rap1gds1  
1459769\_at 1.09252 Zinc finger like protein 1 Zfp11  
1459770\_at 0.90949 TAO kinase 1 Taok1  
1459771\_x\_at 1.04266 "phytoceramidase, alkaline" Phca  
1459772\_at 0.94512 Hermansky-Pudlak syndrome 3 homolog (human) Hps3  
1459773\_x\_at 0.99154 Smad nuclear interacting protein 1 Snip1  
1459774\_at 0.92207 Tetraspanin 5 Tspan5  
1459775\_at 0.91698 3-phosphoinositide dependent protein kinase-1 Pdpk1  
1459776\_x\_at 1.04310 3-phosphoinositide dependent protein kinase-1 Pdpk1  
1459777\_at 0.91744 "interleukin 1 receptor, type I" Il1r1  
1459778\_at 1.04276 Ribophorin I Rpn1  
1459779\_s\_at 1.19488 SET domain containing (lysine methyltransferase) 8 Setd8  
1459780\_at 0.90233 transformation related protein 53 Trp53  
1459781\_x\_at 0.89951 transformation related protein 53 Trp53  
1459782\_x\_at 0.82873 "ATP-binding cassette, sub-family C (CFTR/MRP), member 5" Abcc5  
1459783\_s\_at 0.95470 cappuccino Cno  
1459784\_x\_at 0.94284 RIKEN cDNA 1300002A08 gene 1300002A08Rik  
1459785\_at 0.92911 Zinc finger protein 383 Zfp383  
1459786\_at 0.99279 Transcribed locus ---  
1459787\_at 0.94600 --- ---  
1459788\_at 1.10705 expressed sequence AI790205 AI790205  
1459789\_at 0.95069 --- ---  
1459790\_x\_at 1.12492 aristaless 3 Alx3  
1459791\_at 1.00966 "DnaJ (Hsp40) homolog, subfamily C, member 1" Dnajc1  
1459792\_at 1.00525 --- ---  
1459793\_s\_at 0.79037 --- ---  
1459794\_at 1.07197 BCL2-like 11 (apoptosis facilitator) Bcl2l11  
1459795\_at 0.92994 G protein-coupled receptor 85 Gpr85  
1459796\_at 1.04753 RIKEN cDNA 1700061E18 gene 1700061E18Rik  
1459797\_at 0.97033 Erythrocyte protein band 4.1-like 2 Epb4.112  
1459798\_x\_at 1.00437 RIKEN cDNA 4732479N06 gene 4732479N06Rik  
1459799\_at 0.92638 "FERM, RhoGEF (Arhgef) and pleckstrin domain protein 1 (chondrocyte-derived)" Farp1  
1459800\_s\_at 0.91131 mitogen activated protein kinase kinase kinase 4 Map3k4  
1459801\_at 0.78876 "UDP-Gal:betaGlcNAc beta 1,3-galactosyltransferase, polypeptide 5"

## B3galt5

1459802\_at 0.91800 --- ---  
 1459803\_x\_at 1.02793 RIKEN cDNA 2810408A11 gene 2810408A11Rik  
 1459804\_at 0.75978 CREB binding protein Crebbp  
 1459805\_x\_at 1.01899 dihydrouridine synthase 3-like (*S. cerevisiae*) Dus3l  
 1459806\_x\_at 0.97121 mitochondrial ribosomal protein S23 Mrps23  
 1459807\_x\_at 1.06972 RIKEN cDNA 4933406E20 gene 4933406E20Rik  
 1459808\_at 0.97531 FK506 binding protein 4 Fkbp4  
 1459809\_x\_at 0.93054 RIKEN cDNA 1700063D05 gene 1700063D05Rik  
 1459810\_at 1.03063 RIKEN cDNA 1110008F13 gene 1110008F13Rik  
 1459811\_at 1.05464 metal response element binding transcription factor 2 Mtf2  
 1459812\_x\_at 0.91592 tetraspanin 7 Tspan7  
 1459813\_at 0.89938 RIKEN cDNA 1700012D01 gene 1700012D01Rik  
 1459814\_at 0.96598 transmembrane protein 109 Tmem109  
 1459815\_at 0.89211 "zinc finger, MYND domain containing 12" Zmynd12  
 1459816\_x\_at 1.03292 --- ---  
 1459817\_at 1.03052 --- ---  
 1459818\_x\_at 0.97560 "zinc finger, MYM-type 3" Zmym3  
 1459819\_at 0.94551 RIKEN cDNA 5330439K02 gene 5330439K02Rik  
 1459820\_at 0.93816 RIKEN cDNA A630082K20 gene A630082K20Rik  
 1459821\_x\_at 1.02150 RIKEN cDNA A630082K20 gene A630082K20Rik  
 1459822\_at 0.88321 RAE1 RNA export 1 homolog (*S. pombe*) Rae1  
 1459823\_at 0.97605 EH-domain containing 2 /// similar to EH-domain containing 2 Ehd2 ///  
 LOC673251  
 1459824\_at 0.94172 "SWI/SNF related, matrix associated, actin dependent regulator of chromatin, subfamily c, member 1" Smarcc1  
 1459825\_x\_at 0.93463 insulin-like growth factor 2 mRNA binding protein 1 Igf2bp1  
 1459826\_at 1.00873 "Potassium voltage-gated channel, subfamily Q, member 2" Kcnq2  
 1459827\_x\_at 1.00229 Hermansky-Pudlak syndrome 1 homolog (human) Hps1  
 1459828\_at 1.07650 Serine/arginine repetitive matrix 1 Srrm1  
 1459829\_x\_at 1.04329 CDNA sequence BC031781 BC031781  
 1459830\_at 1.02741 Transcribed locus ---  
 1459831\_s\_at 1.04785 transmembrane and coiled-coil domains 5 Tmco5  
 1459832\_s\_at 0.98703 "adaptor-related protein complex AP-1, mu subunit 1" Ap1m1  
 1459833\_x\_at 0.94108 calcium and integrin binding family member 2 Cib2  
 1459834\_x\_at 1.08641 --- ---  
 1459835\_s\_at 0.82054 "DnaJ (Hsp40) homolog, subfamily A, member 1" Dnaj1  
 1459836\_x\_at 1.06330 "splicing factor 3b, subunit 2" Sf3b2  
 1459837\_at 1.08247 Cytochrome b-561 domain containing 1 Cyb561d1  
 1459838\_s\_at 0.64007 BTB (POZ) domain containing 11 Btbd11  
 1459839\_x\_at 0.97246 BTB (POZ) domain containing 11 Btbd11  
 1459840\_s\_at 1.03980 coiled coil domain containing 28B Ccdc28b  
 1459841\_x\_at 0.92322 lysosomal-associated protein transmembrane 5 Laptm5

1459842\_x\_at 0.81952 nucleotide binding protein 2 Nubp2  
1459843\_s\_at 0.84529 MAD homolog 1 (Drosophila) Smad1  
1459844\_at 0.93889 TNFAIP3 interacting protein 2 Tnip2  
1459845\_at 1.04063 Chromobox homolog 5 (Drosophila HP1a) Cbx5  
1459846\_x\_at 0.99965 transmembrane protein 4 Tmem4  
1459847\_x\_at 0.88483 glial cell line derived neurotrophic factor family receptor alpha 2 Gfra2  
1459848\_x\_at 0.98121 dopamine beta hydroxylase Dbh  
1459849\_x\_at 1.11893 valosin containing protein (p97)/p47 complex interacting protein 1 Vcpip1  
1459850\_x\_at 0.88297 "glycine receptor, beta subunit" Glrb  
1459851\_x\_at 0.86060 RIO kinase 1 (yeast) Riok1  
1459852\_x\_at 0.98463 tribbles homolog 2 (Drosophila) Trib2  
1459853\_x\_at 0.99134 --- ---  
1459854\_s\_at 0.86232 dynein light chain Tctex-type 3 Dynlt3  
1459855\_x\_at 0.99050 ARP1 actin-related protein 1 homolog A (yeast) Actr1a  
1459856\_at 0.97924 Mitochondrial ribosomal protein L13 Mrpl13  
1459857\_at 1.47634 ubiquitin specific peptidase 32 Usp32  
1459858\_x\_at 0.92723 cartilage acidic protein 1 Crtac1  
1459859\_x\_at 1.08017 chromatin accessibility complex 1 Chrac1  
1459860\_x\_at 0.78962 tripartite motif protein 2 Trim2  
1459861\_s\_at 1.00873 F-box and leucine-rich repeat protein 10 Fbxl10  
1459862\_at 0.94739 Transcribed locus ---  
1459863\_x\_at 0.88000 "golgi associated, gamma adaptin ear containing, ARF binding protein 1" Ggal  
1459864\_at 1.11982 G protein-coupled receptor 146 Gpr146  
1459865\_x\_at 1.04403 carboxylesterase 7 Ces7  
1459866\_x\_at 0.97616 non imprinted in Prader-Willi/Angelman syndrome 2 homolog (human)  
Nipa2  
1459867\_x\_at 0.91666 unc-45 homolog A (C. elegans) Unc45a  
1459868\_x\_at 0.85235 "interleukin 11 receptor, alpha chain 1 /// interleukin 11 receptor, alpha chain  
2 /// similar to interleukin 11 receptor, alpha chain 2" Il11ra1 /// Il11ra2 /// LOC621887  
1459869\_x\_at 1.08146 RIKEN cDNA 4930402E16 gene 4930402E16Rik  
1459870\_x\_at 0.92813 "Interleukin 2 receptor, beta chain" Il2rb  
1459871\_x\_at 0.97713 membrane-associated ring finger (C3HC4) 2 2-Mar  
1459872\_x\_at 0.78165 "histocompatibility 2, class II, locus DMa" H2-DMa  
1459873\_x\_at 0.86556 "Melanoma antigen, family D, 2" Maged2  
1459874\_s\_at 0.91693 myotubularin related protein 4 Mtmr4  
1459875\_x\_at 0.98455 RIKEN cDNA 5730494M16 gene 5730494M16Rik  
1459876\_at 0.93389 Natriuretic peptide receptor 1 Npr1  
1459877\_x\_at 0.91306 Ring finger protein 185 Rnf185  
1459878\_a\_at 0.94205 RIKEN cDNA A430107O13 gene A430107O13Rik  
1459879\_at 1.67445 RIKEN cDNA 4921513D23 gene 4921513D23Rik  
1459880\_at 1.36479 heterogeneous nuclear ribonucleoprotein A/B Hnrpab  
1459881\_at 1.02157 expressed sequence AI595406 AI595406  
1459882\_at 1.09190 --- ---

1459883\_at 0.94738 "Adult male epididymis cDNA, RIKEN full-length enriched library, clone:9230001K01 product:unclassifiable, full insert sequence" ---

1459884\_at 0.90709 "cytochrome c oxidase, subunit VIIc" Cox7c

1459885\_s\_at 0.84279 "cytochrome c oxidase, subunit VIIc" Cox7c

1459886\_at 0.92327 Transcribed locus ---

1459887\_at 1.19338 Transcribed locus ---

1459888\_at 0.95084 hypothetical protein LOC545261 LOC545261

1459889\_at 0.96837 chloride channel calcium activated 3 Clca3

1459890\_s\_at 1.15532 RIKEN cDNA 1110008P14 gene 1110008P14Rik

1459891\_at 0.97423 expressed sequence C78444 C78444

1459892\_at 0.89291 expressed sequence AA408156 AA408156

1459893\_at 0.90508 expressed sequence C76472 C76472

1459894\_at 0.94988 IQ motif containing GTPase activating protein 2 Iqgap2

1459895\_at 0.86789 RIKEN cDNA C030010B13 gene C030010B13Rik

1459896\_at 0.87265 pogo transposable element with KRAB domain Pogk

1459897\_a\_at 0.89559 suprabasin Sbsn

1459898\_at 1.10439 suprabasin Sbsn

1459900\_at 1.19128 expressed sequence C79468 C79468

1459901\_at 0.98180 hypothetical protein 6820429M01 6820429M01

1459902\_at 1.00928 RIKEN cDNA 2700007P21 gene 2700007P21Rik

1459903\_at 0.97561 "sema domain, immunoglobulin domain (Ig), and GPI membrane anchor, (semaphorin) 7A" Sema7a

1459904\_at 0.89177 cDNA sequence BC030870 BC030870

1459905\_at 1.12459 "10 days neonate cerebellum cDNA, RIKEN full-length enriched library, clone: B930063G06 product:unclassifiable, full insert sequence" ---

1459906\_at 0.93899 "Diacylglycerol kinase, eta" Dgkh

1459907\_a\_at 1.18629 Wolf-Hirschhorn syndrome candidate 1-like 1 (human) Whsc111

1459908\_at 1.14687 "CD47 antigen (Rh-related antigen, integrin-associated signal transducer)" Cd47

1459909\_at 0.98729 nuclear factor I/X Nfix

1459910\_at 0.78267 "tankyrase, TRF1-interacting ankyrin-related ADP-ribose polymerase" Tnks

1459911\_at 0.92671 cerebellar degeneration-related protein 2-like Cdr2l

1459912\_at 0.92815 mitogen-activated protein kinase kinase kinase 4 Map4k4

1459913\_at 0.99688 "tumor necrosis factor (ligand) superfamily, member 10" Tnfsf10

1459914\_at 0.95618 RIKEN cDNA 2810402A17 gene 2810402A17Rik

1459916\_at 1.08917 Paired box gene 5 Pax5

1459917\_at 2.42144 expressed sequence AI451896 AI451896

1459918\_at 1.00087 budding uninhibited by benzimidazoles 3 homolog (S. cerevisiae) Bub3

1459919\_a\_at 0.92265 "MOB1, Mps One Binder kinase activator-like 2C (yeast)" Mobk12c

1459920\_at 1.01697 RIKEN cDNA 4933415E08 gene 4933415E08Rik

1459921\_at 0.94034 neurexophilin 1 Nxph1

1459922\_at 1.01671 expressed sequence AI646383 AI646383

1459923\_at 0.92587 brain expressed gene 6 Bex6



|              |         |                                                                                                                                                 |               |
|--------------|---------|-------------------------------------------------------------------------------------------------------------------------------------------------|---------------|
| 1459924_at   | 0.88299 | "ATPase, H <sup>+</sup> transporting, lysosomal V0 subunit A1"                                                                                  | Atp6v0a1      |
| 1459925_at   | 1.11722 | expressed sequence C78282                                                                                                                       | C78282        |
| 1459926_at   | 1.04758 | expressed sequence C77068                                                                                                                       | C77068        |
| 1459927_at   | 1.07072 | RIKEN cDNA 4833445I07 gene                                                                                                                      | 4833445I07Rik |
| 1459928_at   | 1.21121 | ligand dependent nuclear receptor corepressor                                                                                                   | Lcor          |
| 1459929_at   | 1.02358 | zinc finger protein 568                                                                                                                         | Zfp568        |
| 1459930_at   | 0.86830 | Ubiquitin-conjugating enzyme E2H                                                                                                                | Ube2h         |
| 1459931_a_at | 0.93944 | Similar to zinc finger protein 709                                                                                                              | LOC626877     |
| 1459932_at   | 0.89848 | "DNA segment, Chr 8, ERATO Doi 28, expressed"                                                                                                   | D8Ertd28e     |
| 1459933_at   | 0.99478 | ---                                                                                                                                             | ---           |
| 1459934_at   | 1.11104 | ubiquitin specific peptidase 42                                                                                                                 | Usp42         |
| 1459935_at   | 1.08483 | EST AA517562                                                                                                                                    | AA517562      |
| 1459936_at   | 0.93432 | Transcribed locus                                                                                                                               | ---           |
| 1459937_at   | 0.98392 | Argininosuccinate synthetase 1                                                                                                                  | Ass1          |
| 1459938_at   | 1.05160 | RIKEN cDNA C330024D21 gene                                                                                                                      | C330024D21Rik |
| 1459939_at   | 1.01757 | Transcribed locus                                                                                                                               | ---           |
| 1459940_at   | 1.09491 | ---                                                                                                                                             | ---           |
| 1459941_at   | 1.02849 | RIKEN cDNA 4933402J24 gene                                                                                                                      | 4933402J24Rik |
| 1459942_at   | 1.03955 | Open reading frame 34                                                                                                                           | ORF34         |
| 1459943_at   | 0.86687 | RIKEN cDNA A030012G06 gene                                                                                                                      | A030012G06Rik |
| 1459944_at   | 1.16032 | "UTP11-like, U3 small nucleolar ribonucleoprotein, (yeast)"                                                                                     | Utp11         |
| 1459945_at   | 1.10406 | "Adult male corpora quadrigemina cDNA, RIKEN full-length enriched library, clone:B230215A15 product:hypothetical protein, full insert sequence" | ---           |
| 1459946_at   | 1.00680 | "Adult male diencephalon cDNA, RIKEN full-length enriched library, clone:9330150G21 product:unclassifiable, full insert sequence"               | ---           |
| 1459947_at   | 0.93758 | Bone morphogenetic protein 6                                                                                                                    | Bmp6          |
| 1459948_at   | 1.00657 | Growth hormone receptor                                                                                                                         | Ghr           |
| 1459949_at   | 1.23187 | "ATP synthase, H <sup>+</sup> transporting, mitochondrial F0 complex, subunit s"                                                                | Atp5s         |
| 1459950_at   | 0.95330 | Doublecortin and CaM kinase-like 2                                                                                                              | Dcamk12       |
| 1459951_at   | 1.34503 | "ribosomal protein S6 kinase, polypeptide 1"                                                                                                    | Rps6kb1       |
| 1459952_at   | 1.01505 | Ankyrin repeat domain 17                                                                                                                        | Ankrd17       |
| 1459953_at   | 1.12210 | Expressed sequence AW011752                                                                                                                     | AW011752      |
| 1459954_at   | 1.06153 | ---                                                                                                                                             | ---           |
| 1459955_at   | 1.03499 | RIKEN cDNA 5830484A20 gene                                                                                                                      | 5830484A20Rik |
| 1459956_at   | 0.93029 | ---                                                                                                                                             | ---           |
| 1459957_at   | 1.53651 | Trinucleotide repeat containing 6a                                                                                                              | Tnrc6a        |
| 1459958_at   | 1.75394 | arginine/serine-rich coiled-coil 1                                                                                                              | Rsrc1         |
| 1459959_at   | 1.08755 | Glycine decarboxylase                                                                                                                           | Glhc          |
| 1459960_at   | 1.00418 | Transcribed locus                                                                                                                               | ---           |
| 1459961_a_at | 1.12543 | Signal transducer and activator of transcription 3                                                                                              | Stat3         |
| 1459962_at   | 1.09214 | RIKEN cDNA 4930523C07 gene                                                                                                                      | 4930523C07Rik |
| 1459963_at   | 1.04733 | "Polymerase (DNA directed), alpha 1"                                                                                                            | Pola1         |
| 1459964_at   | 0.98609 | Jun proto-oncogene related gene d1                                                                                                              | Jund1         |

1459965\_at 0.93912 Dyslexia susceptibility 1 candidate 1 homolog (human) Dyx1c1  
1459966\_at 1.23713 Oxysterol binding protein-like 7 Osbpl7  
1459967\_at 1.02021 Transcribed locus ---  
1459968\_at 1.27632 "RNA binding motif, single stranded interacting protein 1" Rbms1  
1459969\_x\_at 1.06934 Transcribed locus ---  
1459970\_at 1.05698 Uronyl-2-sulfotransferase Ust  
1459971\_at 0.96263 "Potassium channel, subfamily T, member 2" Kcnt2  
1459972\_x\_at 0.78876 seizure related gene 6 Sez6  
1459973\_x\_at 0.90328 dipeptidylpeptidase 4 Dpp4  
1459974\_x\_at 1.02408 RIKEN cDNA 2700008N14 gene 2700008N14Rik  
1459975\_at 1.04752 Transcribed locus ---  
1459976\_s\_at 1.14694 "superoxide dismutase 1, soluble" Sod1  
1459977\_x\_at 0.98506 "COX10 homolog, cytochrome c oxidase assembly protein, heme A:  
farnesyltransferase (yeast)" Cox10  
1459978\_x\_at 1.06265 cyclin J-like Ccnj1  
1459979\_x\_at 0.91544 zinc finger protein 68 Zfp68  
1459980\_x\_at 0.98503 "RAB3A, member RAS oncogene family" Rab3a  
1459981\_s\_at 1.08005 "rosbin, round spermatid basic protein 1" Rsb1  
1459982\_a\_at 0.89403 --- ---  
1459983\_at 0.97022 inositol (myo)-1(or 4)-monophosphatase 2 Impa2  
1459984\_at 0.98512 melanoma inhibitory activity 3 Mia3  
1459985\_at 1.10772 WD repeat domain 61 Wdr61  
1459986\_a\_at 1.03782 ribosomal protein S17 Rps17  
1459987\_s\_at 1.05413 chaperonin subunit 3 (gamma) Cct3  
1459988\_at 0.89699 methyl-CpG binding domain protein 3-like 2 Mbd3l2  
1459989\_at 0.97035 Transcribed locus ---  
1459990\_at 0.93605 "discoidin domain receptor family, member 1" Ddr1  
1459991\_at 1.09930 myosin IXa Myo9a  
1459992\_x\_at 0.93281 "ceroid-lipofuscinosis, neuronal 8" Cln8  
1459993\_at 0.95393 "0 day neonate lung cDNA, RIKEN full-length enriched library, clone:  
E030043J12 product:twist homolog 2 (Drosophila), full insert sequence" ---  
1459994\_x\_at 1.01868 transferrin receptor 2 Trfr2  
1459995\_at 0.94196 RIKEN cDNA 1700015G11 gene 1700015G11Rik  
1459996\_at 0.85176 "Calcium channel, voltage-dependent, P/Q type, alpha 1A subunit" Cacna1a  
1459997\_s\_at 0.83232 transmembrane protein 17 Tmem17  
1459998\_at 0.93392 zinc finger protein 407 Zfp407  
1459999\_at 0.97627 "splicing factor, arginine/serine-rich 15 /// similar to splicing factor, arginine/  
serine-rich 15" Sfrs15 /// LOC670368  
1460000\_at 0.97520 RIKEN cDNA D830007B15 gene D830007B15Rik  
1460001\_at 0.89145 pyroglutamyl-peptidase I Pgpep1  
1460002\_at 1.71619 tousled-like kinase 1 Tlk1  
1460003\_at 1.04720 expressed sequence AI956758 AI956758  
1460004\_x\_at 0.99013 syntaxin 6 Stx6

1460005\_at 0.99545 "expressed sequence AF013969 /// similar to CG5514-PB, isoform B /// region containing expressed sequence AF013969; RIKEN cDNA A230054D04 gene" AF013969 /// LOC665775 /// LOC675766

1460006\_at 0.94500 AT motif binding factor 1 Atbf1

1460007\_at 0.91688 thymocyte nuclear protein 1 Thyn1

1460008\_x\_at 1.01144 ERO1-like (S. cerevisiae) /// ribosomal protein L31 /// similar to ribosomal protein L31 /// similar to ribosomal protein L31 /// similar to ribosomal protein L31 Ero11 /// Rpl31 /// LOC667682 /// LOC672957 /// LOC676592

1460009\_at 0.89074 Transcribed locus ---

1460010\_a\_at 0.90665 phosphatidylserine synthase 2 Ptdss2

1460011\_at 0.78438 "cytochrome P450, family 26, subfamily b, polypeptide 1" Cyp26b1

1460012\_at 0.98749 WAP four-disulfide core domain 3 Wfdc3

1460013\_at 1.02621 neuroligin 2 Nlgn2

1460014\_at 0.86283 triggering receptor expressed on myeloid cells-like 4 Trem14

1460015\_at 1.01524 spermatogenesis and oogenesis specific basic helix-loop-helix 1 Sohlh1

1460016\_at 1.29915 transmembrane protein 164 Tmem164

1460017\_at 1.03255 hypothetical LOC434179 LOC434179

1460018\_at 0.90110 "DNA segment, Chr 11, ERATO Doi 759, expressed" D11Ert759e

1460019\_at 0.94862 similar to leucine rich repeat containing 45 LOC627607

1460020\_at 1.03341 hypothetical protein LOC629623 LOC629623

1460021\_at 0.99137 hypothetical protein LOC626231 LOC626231

1460022\_at 0.92488 "ATP-binding cassette, sub-family B (MDR/TAP), member 8" Abcb8

1460023\_at 0.97851 --- ---

1460024\_at 0.90002 trinucleotide repeat containing 6b Tnrc6b

1460025\_at 1.00690 leucine-rich repeats and immunoglobulin-like domains 2 Lrig2

1460026\_s\_at 0.95418 "zinc finger, FYVE domain containing 27" Zfyve27

1460027\_at 0.95282 cDNA sequence BC061194 BC061194

1460028\_at 0.88000 glutamate receptor interacting protein 2 Grip2

1460029\_at 1.03746 GTP binding protein 5 Gtpbp5

1460030\_at 1.05973 "HECT, C2 and WW domain containing E3 ubiquitin protein ligase 1" Hecw1

1460031\_at 1.00368 G protein-coupled receptor 45 Gpr45

1460032\_at 2.49940 RIKEN cDNA 4933407C03 gene 4933407C03Rik

1460033\_at 0.95166 RIKEN cDNA C030002C11 gene C030002C11Rik

1460034\_at 0.93685 sterile alpha motif domain containing 4B Samd4b

1460035\_at 1.27894 prohibitin 2 Phb2

1460036\_at 1.14184 "adaptor-related protein complex 1, sigma 2 subunit" Ap1s2

1460037\_at 1.14775 RIKEN cDNA 2610510H03 gene 2610510H03Rik

1460038\_at 0.91706 "POU domain, class 3, transcription factor 1" Pou3f1

1460039\_at 0.84439 "C-type lectin domain family 1, member a" Clec1a

1460040\_at 0.95991 RIKEN cDNA 4933407H18 gene 4933407H18Rik

1460041\_at 0.87131 RIKEN cDNA D630040I23 gene D630040I23Rik

1460042\_at 0.95576 "solute carrier family 23 (nucleobase transporters), member 3" Slc23a3

1460043\_at 0.99689 --- ---  
1460044\_at 0.91037 "0 day neonate cerebellum cDNA, RIKEN full-length enriched library, clone: C230062K19 product:unclassifiable, full insert sequence" ---  
1460045\_at 1.00509 "cadherin 7, type 2" Cdh7  
1460046\_at 0.95197 "pleckstrin homology domain containing, family G (with RhoGef domain) member 1" Plekhg1  
1460047\_at 1.33918 Formin binding protein 1 Fnbp1  
1460048\_at 1.07012 "Zinc finger, DHHC domain containing 13" Zdhhc13  
1460049\_s\_at 0.51616 RIKEN cDNA 1500015O10 gene 1500015O10Rik  
1460050\_x\_at 1.01857 RIKEN cDNA 5630401D24 gene 5630401D24Rik  
1460051\_at 0.89967 cDNA sequence BC038613 BC038613  
1460052\_at 0.94222 Acyl-CoA synthetase medium-chain family member 1 Acsm1  
1460053\_at 0.99007 SET and MYND domain containing 4 Smyd4  
1460054\_at 1.07557 trafficking protein particle complex 6A Trappc6a  
1460055\_at 1.04812 Ecotropic viral integration site 2a Evi2a  
1460056\_at 0.99645 RIKEN cDNA 1700109F18 gene 1700109F18Rik  
1460057\_at 0.95845 growth differentiation factor 3 Gdf3  
1460058\_at 0.80803 "10 days neonate cortex cDNA, RIKEN full-length enriched library, clone: A830028J12 product:unclassifiable, full insert sequence" ---  
1460059\_at 1.01161 uridine phosphorylase 2 Upp2  
1460060\_at 0.98681 --- ---  
1460061\_at 1.15382 "Adult male olfactory brain cDNA, RIKEN full-length enriched library, clone:6430530M09 product:unclassifiable, full insert sequence" ---  
1460062\_at 0.94432 "pleckstrin homology domain containing, family H (with MyTH4 domain) member 2" Plekhh2  
1460063\_at 1.47774 "DNA segment, Chr 5, ERATO Doi 798, expressed" D5Ertd798e  
1460064\_at 1.03111 cDNA sequence BC028789 BC028789  
1460065\_at 0.97828 expressed sequence AA763515 AA763515  
1460066\_at 1.06077 expressed sequence C80889 C80889  
1460067\_at 0.84733 chemokine (C-C motif) receptor 2 Ccr2  
1460068\_at 1.16409 RIKEN cDNA 1110034C04 gene 1110034C04Rik  
1460069\_at 1.29269 structural maintenance of chromosomes 6 Smc6  
1460070\_at 0.84698 Carbohydrate sulfotransferase 2 Chst2  
1460071\_at 0.97607 SAP30-like Sap30l  
1460072\_at 0.82480 Transcribed locus ---  
1460073\_at 1.04268 "Protein kinase, cAMP dependent regulatory, type I beta" Prkar1b  
1460074\_x\_at 0.80334 ependymin related protein 2 (zebrafish) Epdr2  
1460075\_x\_at 0.95815 Small nuclear ribonucleoprotein N Snrpn  
1460076\_x\_at 0.91186 --- ---  
1460077\_at 1.58734 tetratricopeptide repeat domain 3 Ttc3  
1460078\_at 1.00544 RIKEN cDNA G630024C07 gene G630024C07Rik  
1460079\_at 0.90144 Tetratricopeptide repeat domain 5 Ttc5  
1460080\_at 1.04227 expressed sequence AI645535 AI645535

|              |         |                                                                                                                               |               |  |
|--------------|---------|-------------------------------------------------------------------------------------------------------------------------------|---------------|--|
| 1460081_at   | 0.93451 | Synaptotagmin VII                                                                                                             | Syt7          |  |
| 1460082_at   | 0.91662 | "inhibitor of growth family, member 3"                                                                                        | Ing3          |  |
| 1460083_at   | 0.99670 | A disintegrin and metallopeptidase domain 10                                                                                  | Adam10        |  |
| 1460084_at   | 1.14192 | ---                                                                                                                           | ---           |  |
| 1460085_at   | 0.90991 | Zinc finger protein 281                                                                                                       | Zfp281        |  |
| 1460086_at   | 1.11971 | ---                                                                                                                           | ---           |  |
| 1460087_at   | 0.96185 | cDNA sequence BC017643                                                                                                        | BC017643      |  |
| 1460088_at   | 0.90280 | RIKEN cDNA 6430531B16 gene                                                                                                    | 6430531B16Rik |  |
| 1460089_at   | 0.93931 | Period homolog 3 (Drosophila)                                                                                                 | Per3          |  |
| 1460090_at   | 0.98475 | Ariadne ubiquitin-conjugating enzyme E2 binding protein homolog 1 (Drosophila)                                                | Arih1         |  |
| 1460091_at   | 1.14903 | "protein phosphatase 1, regulatory (inhibitor) subunit 12B"                                                                   | Ppp1r12b      |  |
| 1460092_at   | 0.96643 | Limbic system-associated membrane protein                                                                                     | Lsamp         |  |
| 1460093_at   | 0.89800 | ---                                                                                                                           | ---           |  |
| 1460094_at   | 1.14282 | ---                                                                                                                           | ---           |  |
| 1460095_at   | 1.07092 | RIKEN cDNA 1110030E23 gene                                                                                                    | 1110030E23Rik |  |
| 1460096_at   | 1.73288 | Lysosomal membrane glycoprotein 1                                                                                             | Lamp1         |  |
| 1460097_at   | 1.00412 | "Glutamate receptor, ionotropic, AMPA4 (alpha 4)"                                                                             | Gria4         |  |
| 1460098_at   | 0.99872 | ---                                                                                                                           | ---           |  |
| 1460099_at   | 2.01795 | "ATPas, class II, type 9B"                                                                                                    | Atp9b         |  |
| 1460100_at   | 1.05464 | Ladybird homeobox 1 homolog (Drosophila) corepressor 1                                                                        | Lbxcor1       |  |
| 1460101_at   | 0.90255 | Neurexin III                                                                                                                  | Nrxn3         |  |
| 1460102_at   | 1.35937 | CLIP associating protein 1                                                                                                    | Clasp1        |  |
| 1460103_at   | 0.97433 | ---                                                                                                                           | ---           |  |
| 1460104_at   | 1.08268 | vacuolar protein sorting 4b (yeast)                                                                                           | Vps4b         |  |
| 1460105_at   | 0.87104 | "UDP-GalNAc:betaGlcNAc beta 1,3-galactosaminyltransferase, polypeptide 2"                                                     | B3galnt2      |  |
| 1460106_at   | 0.90045 | hydrocephalus inducing                                                                                                        | Hydin         |  |
| 1460107_at   | 0.99588 | RIKEN cDNA 1700129I04 gene                                                                                                    | 1700129I04Rik |  |
| 1460108_at   | 0.92417 | TRNA isopentenyltransferase 1                                                                                                 | Trit1         |  |
| 1460109_at   | 1.28617 | Transcription factor 25 (basic helix-loop-helix)                                                                              | Tcf25         |  |
| 1460110_at   | 1.13900 | rotatin                                                                                                                       | Rtnn          |  |
| 1460111_at   | 0.94104 | myelin transcription factor 1-like                                                                                            | Myt1l         |  |
| 1460112_at   | 1.11088 | Transcribed locus                                                                                                             | ---           |  |
| 1460113_at   | 1.41676 | RIKEN cDNA B930093H17 gene                                                                                                    | B930093H17Rik |  |
| 1460114_at   | 1.01790 | RIKEN cDNA 1700123M08 gene                                                                                                    | 1700123M08Rik |  |
| 1460115_at   | 0.93786 | "Solute carrier family 26, member 11"                                                                                         | Slc26a11      |  |
| 1460116_s_at | 1.05425 | "sprouty protein with EVH-1 domain 1, related sequence"                                                                       | Spred1        |  |
| 1460117_at   | 0.99862 | ---                                                                                                                           | ---           |  |
| 1460118_at   | 1.08915 | Transcribed locus                                                                                                             | ---           |  |
| 1460119_at   | 1.02534 | "16 days embryo lung cDNA, RIKEN full-length enriched library, clone:8430415C15 product:unclassifiable, full insert sequence" | ---           |  |
| 1460120_at   | 1.10597 | actin-binding LIM protein 1                                                                                                   | Ablim1        |  |

|            |         |                                                                                                                             |               |
|------------|---------|-----------------------------------------------------------------------------------------------------------------------------|---------------|
| 1460121_at | 1.97386 | RIKEN cDNA 9630010G10 gene                                                                                                  | 9630010G10Rik |
| 1460122_at | 0.82866 | transmembrane protein 41B                                                                                                   | Tmem41b       |
| 1460123_at | 1.01820 | G protein-coupled receptor 1                                                                                                | Gpr1          |
| 1460124_at | 0.94912 | RIKEN cDNA 1190020J12 gene                                                                                                  | 1190020J12Rik |
| 1460125_at | 1.00718 | RIKEN cDNA 2610301F02 gene                                                                                                  | 2610301F02Rik |
| 1460126_at | 2.48988 | Ubiquitin specific peptidase 34                                                                                             | Usp34         |
| 1460127_at | 1.01304 | "hepatocyte nuclear factor 4, gamma"                                                                                        | Hnf4g         |
| 1460128_at | 0.94205 | Transmembrane emp24 domain trafficking protein 2                                                                            | Tmed2         |
| 1460129_at | 0.97230 | "solute carrier family 6 (neurotransmitter transporter, noradrenalin), member 2"                                            | Slc6a2        |
| 1460130_at | 1.01799 | hypothetical LOC433632                                                                                                      | LOC433632     |
| 1460131_at | 0.98006 | Ring finger protein 170                                                                                                     | Rnf170        |
| 1460132_at | 1.10443 | "Ubiquitin-conjugating enzyme E2B, RAD6 homology (S. cerevisiae)"                                                           | Ube2b         |
| 1460133_at | 2.95039 | ---                                                                                                                         | ---           |
| 1460134_at | 0.91410 | RIKEN cDNA 9330175E14 gene                                                                                                  | 9330175E14Rik |
| 1460135_at | 1.03207 | RIKEN cDNA A930005H10 gene                                                                                                  | A930005H10Rik |
| 1460136_at | 1.00401 | expressed sequence AW047481                                                                                                 | AW047481      |
| 1460137_at | 0.89189 | Fibroblast growth factor 12                                                                                                 | Fgf12         |
| 1460138_at | 1.40957 | RIKEN cDNA 5730446C15 gene                                                                                                  | 5730446C15Rik |
| 1460139_at | 1.01513 | expressed sequence C79256                                                                                                   | C79256        |
| 1460140_at | 1.14234 | CD2-associated protein                                                                                                      | Cd2ap         |
| 1460141_at | 0.98601 | Transcribed locus                                                                                                           | ---           |
| 1460142_at | 0.87958 | "DNA segment, Chr 13, ERATO Doi 324, expressed"                                                                             | D13Ertd324e   |
| 1460143_at | 0.99041 | ---                                                                                                                         | ---           |
| 1460144_at | 1.40276 | CDNA sequence BC052040                                                                                                      | BC052040      |
| 1460145_at | 0.94924 | ---                                                                                                                         | ---           |
| 1460146_at | 0.99581 | ---                                                                                                                         | ---           |
| 1460147_at | 0.97329 | RIKEN cDNA A730009E18 gene                                                                                                  | A730009E18Rik |
| 1460148_at | 1.03319 | Transcribed locus                                                                                                           | ---           |
| 1460149_at | 0.99342 | ATPase type 13A5                                                                                                            | Atp13a5       |
| 1460150_at | 0.95791 | Transcribed locus                                                                                                           | ---           |
| 1460151_at | 1.31355 | ---                                                                                                                         | ---           |
| 1460152_at | 1.02792 | ---                                                                                                                         | ---           |
| 1460153_at | 1.00038 | Abl-interactor 2                                                                                                            | Abi2          |
| 1460154_at | 0.98147 | expressed sequence AI194348                                                                                                 | AI194348      |
| 1460155_at | 0.94751 | RIKEN cDNA 2410005O16 gene                                                                                                  | 2410005O16Rik |
| 1460156_at | 1.10265 | Acyloxyacyl hydrolase                                                                                                       | Aoah          |
| 1460157_at | 1.00295 | ---                                                                                                                         | ---           |
| 1460158_at | 1.02447 | ---                                                                                                                         | ---           |
| 1460159_at | 1.11891 | "myb-like, SWIRM and MPN domains 1"                                                                                         | Mysm1         |
| 1460160_at | 0.97449 | "Adult male testis cDNA, RIKEN full-length enriched library, clone:4930520J05 product:unclassifiable, full insert sequence" | ---           |

1460161\_at 0.90196 "DNA segment, Chr 5, ERATO Doi 422, expressed" D5Ert422e  
 1460162\_at 1.19057 similar to Serine/threonine-protein kinase Nek1 (NimA-related protein kinase 1)  
 LOC640559  
 1460163\_at 1.03967 C1q and tumor necrosis factor related protein 7 C1qtnf7  
 1460164\_at 0.96332 spindlin Spin  
 1460165\_at 1.00338 "protein phosphatase 1, catalytic subunit, alpha isoform" Ppp1ca  
 1460166\_at 1.03208 Ras-like without CAAX 2 Rit2  
 1460167\_at 0.82878 "aldehyde dehydrogenase family 7, member A1" Aldh7a1  
 1460168\_at 0.88528 stem-loop binding protein Slbp  
 1460169\_a\_at 1.01965 PCTAIRE-motif protein kinase 1 Pctk1  
 1460170\_at 0.88143 exostoses (multiple) 2 Ext2  
 1460171\_at 1.07379 "COP9 (constitutive photomorphogenic) homolog, subunit 5 (Arabidopsis thaliana)" Cops5  
 1460172\_at 0.94332 RIKEN cDNA 5730403B10 gene 5730403B10Rik  
 1460173\_at 1.05332 LIM and SH3 protein 1 Laspl  
 1460174\_at 0.86700 dexamethasone-induced transcript Dexi  
 1460175\_at 1.03642 ribosomal protein S23 Rps23  
 1460176\_at 0.87777 v-crk sarcoma virus CT10 oncogene homolog (avian) Crk  
 1460177\_at 0.97697 CNDP dipeptidase 2 (metallopeptidase M20 family) Cndp2  
 1460178\_at 0.86608 RIKEN cDNA 1300002A08 gene 1300002A08Rik  
 1460179\_at 0.90743 "DnaJ (Hsp40) homolog, subfamily A, member 1" Dnaja1  
 1460180\_at 0.88821 hexosaminidase B Hexb  
 1460181\_at 0.94681 stathmin-like 3 Stmn3  
 1460182\_at 1.08452 sorting nexin 4 Snx4  
 1460183\_at 1.02232 ADP-ribosylarginine hydrolase Adprh  
 1460184\_at 0.91847 "L-3-hydroxyacyl-Coenzyme A dehydrogenase, short chain" Hadhsc  
 1460185\_at 0.98415 keratin 85 Krt85  
 1460186\_at 1.03347 transmembrane 9 superfamily member 3 Tm9sf3  
 1460187\_at 0.97529 secreted frizzled-related sequence protein 1 Sfrp1  
 1460188\_at 1.07669 "protein tyrosine phosphatase, non-receptor type 6" Ptpn6  
 1460189\_at 0.92741 WD repeat domain 23 Wdr23  
 1460190\_at 0.97663 "adaptor protein complex AP-1, mu 2 subunit" Ap1m2  
 1460191\_at 0.92884 YKT6 homolog (S. Cerevisiae) Ykt6  
 1460192\_at 0.74837 oxysterol binding protein-like 1A Osbp1a  
 1460193\_at 1.04234 suppression of tumorigenicity 13 St13  
 1460194\_at 0.78533 phytanoyl-CoA hydroxylase Phyh  
 1460195\_at 0.97974 mitochondrial ribosomal protein S11 Mrps11  
 1460196\_at 0.88295 carbonyl reductase 1 Cbr1  
 1460197\_a\_at 0.88554 STEAP family member 4 Steap4  
 1460198\_a\_at 1.09468 "proteasome (prosome, macropain) subunit, beta type 3 /// similar to proteasome beta 3 subunit /// similar to proteasome beta 3 subunit /// similar to proteasome beta 3 subunit" Psm3 /// LOC240289 /// LOC636660 /// LOC672201  
 1460199\_a\_at 1.06811 "platelet-activating factor acetylhydrolase, isoform 1b, beta1 subunit" Pafah1b1

1460200\_s\_at 1.00773 leucine zipper transcription factor-like 1 Lztf1  
 1460201\_a\_at 1.06186 ribosomal protein L24 /// similar to ribosomal protein L24 /// similar to ribosomal protein L24 Rpl24 /// LOC668829 /// LOC675789  
 1460202\_at 1.02227 myozenin 1 Myoz1  
 1460203\_at 0.75109 "inositol 1,4,5-triphosphate receptor 1" Itpr1  
 1460204\_at 0.91811 "cytoplasmic tyrosine kinase, Dscr28C related (Drosophila)" Tec  
 1460205\_at 0.96850 dephospho-CoA kinase domain containing Dcakd  
 1460206\_at 0.89096 GRP1 (general receptor for phosphoinositides 1)-associated scaffold protein Grasp  
 1460207\_s\_at 0.98140 E2F transcription factor 5 E2f5  
 1460208\_at 1.03037 fibrillin 1 Fbn1  
 1460209\_at 1.01149 ubiquitin specific peptidase 39 Usp39  
 1460210\_at 0.92331 polycystic kidney disease 1 homolog Pkd1  
 1460211\_a\_at 0.83267 KDEL (Lys-Asp-Glu-Leu) endoplasmic reticulum protein retention receptor 1 Kdelr1  
 1460212\_at 0.91077 "guanine nucleotide binding protein, alpha transducing 1" Gnat1  
 1460213\_at 0.98963 "golgi autoantigen, golgin subfamily a, 4" Golga4  
 1460214\_at 1.04820 Purkinje cell protein 4 Pcp4  
 1460215\_at 1.08286 RNA polymerase 1-4 Rpo1-4  
 1460216\_at 0.91719 "acyl-Coenzyme A dehydrogenase, short chain" Acads  
 1460217\_at 1.00181 proliferin related protein Plfr  
 1460218\_at 0.83089 CD52 antigen Cd52  
 1460219\_at 0.98002 myelin-associated glycoprotein Mag  
 1460220\_a\_at 1.27256 colony stimulating factor 1 (macrophage) Csf1  
 1460221\_at 1.05487 prostaglandin E synthase 3 (cytosolic) Ptges3  
 1460222\_at 0.91120 SH3-domain binding protein 1 Sh3bp1  
 1460223\_a\_at 0.90008 erythrocyte protein band 4.9 Epb4.9  
 1460224\_at 1.00565 sorting nexin 2 Snx2  
 1460225\_at 0.88261 mitochondrial ribosomal protein 63 Mrp63  
 1460226\_at 0.94666 tumor rejection antigen P1A Trap1a  
 1460227\_at 1.19118 tissue inhibitor of metalloproteinase 1 Timp1  
 1460228\_at 0.96914 upstream transcription factor 2 Usf2  
 1460229\_at 1.04263 stromal antigen 3 Stag3  
 1460230\_at 1.07343 synapsin II Syn2  
 1460231\_at 1.06310 interferon regulatory factor 5 Irf5  
 1460232\_s\_at 0.97653 "hydroxy-delta-5-steroid dehydrogenase, 3 beta- and steroid delta-isomerase 2 /// hydroxy-delta-5-steroid dehydrogenase, 3 beta- and steroid delta-isomerase 3 /// hydroxy-delta-5-steroid dehydrogenase, 3 beta- and steroid delta-isomerase 6" Hsd3b2 /// Hsd3b3 /// Hsd3b6  
 1460233\_at 0.83527 guanylate cyclase activator 2b (retina) Guca2b  
 1460234\_at 1.14335 WD repeat domain 81 Wdr81  
 1460235\_at 0.84948 "scavenger receptor class B, member 2" Scarb2  
 1460236\_at 1.07028 kallikrein 10 Klk10  
 1460237\_at 0.94652 tripartite motif protein 8 Trim8



|              |         |                                                                                                                                                                                          |                 |  |
|--------------|---------|------------------------------------------------------------------------------------------------------------------------------------------------------------------------------------------|-----------------|--|
| 1460238_at   | 1.36634 | mesothelin                                                                                                                                                                               | Msln            |  |
| 1460239_at   | 0.94612 | tetraspanin 13                                                                                                                                                                           | Tspan13         |  |
| 1460240_a_at | 0.91997 | heterogeneous nuclear ribonucleoprotein C                                                                                                                                                | Hnrpc           |  |
| 1460241_a_at | 0.87513 | "ST3 beta-galactoside alpha-2,3-sialyltransferase 5"                                                                                                                                     | St3gal5         |  |
| 1460242_at   | 1.05377 | CD55 antigen                                                                                                                                                                             | Cd55            |  |
| 1460243_at   | 1.04795 | "serine palmitoyltransferase, long chain base subunit 2"                                                                                                                                 | Sptlc2          |  |
| 1460244_at   | 0.99044 | "ureidopropionase, beta"                                                                                                                                                                 | Upb1            |  |
| 1460245_at   | 0.92964 | "killer cell lectin-like receptor, subfamily D, member 1"                                                                                                                                | Klrd1           |  |
| 1460246_at   | 0.86694 | methyl CpG binding protein 2                                                                                                                                                             | Mecp2           |  |
| 1460247_a_at | 1.12254 | S-phase kinase-associated protein 2 (p45)                                                                                                                                                | Skp2            |  |
| 1460248_at   | 1.02211 | carboxypeptidase X 2 (M14 family)                                                                                                                                                        | Cpxm2           |  |
| 1460249_at   | 0.92204 | ligand of numb-protein X 2                                                                                                                                                               | Lnx2            |  |
| 1460250_at   | 1.03086 | sclerostin domain containing 1                                                                                                                                                           | Sostdc1         |  |
| 1460251_at   | 1.87646 | Fas (TNF receptor superfamily member)                                                                                                                                                    | Fas             |  |
| 1460252_s_at | 0.98523 | zinc finger protein 105                                                                                                                                                                  | Zfp105          |  |
| 1460253_at   | 1.13771 | CKLF-like MARVEL transmembrane domain containing 7                                                                                                                                       | Cmtm7           |  |
| 1460254_at   | 0.95299 | RIKEN cDNA 1810049H13 gene                                                                                                                                                               | 1810049H13Rik   |  |
| 1460255_at   | 0.93286 | "tumor necrosis factor (ligand) superfamily, member 13b"                                                                                                                                 | Tnfsf13b        |  |
| 1460256_at   | 1.06203 | carbonic anhydrase 3                                                                                                                                                                     | Car3            |  |
| 1460257_a_at | 1.01440 | "5, 10-methenyltetrahydrofolate synthetase"                                                                                                                                              | Mthfs           |  |
| 1460258_at   | 1.03556 | leukocyte cell derived chemotaxin 1                                                                                                                                                      | Lect1           |  |
| 1460259_s_at | 2.30582 | chloride channel calcium activated 1 /// chloride channel calcium activated 2                                                                                                            | Clca1 /// Clca2 |  |
| 1460260_s_at | 1.05647 | karyopherin (importin) alpha 1                                                                                                                                                           | Kpna1           |  |
| 1460261_at   | 1.03831 | "discs, large homolog 4 (Drosophila)"                                                                                                                                                    | Dlgh4           |  |
| 1460262_a_at | 1.05568 | RIKEN cDNA 1700037H04 gene                                                                                                                                                               | 1700037H04Rik   |  |
| 1460263_at   | 0.84900 | Programmed cell death 6 interacting protein                                                                                                                                              | Pdcd6ip         |  |
| 1460264_at   | 0.94277 | large tumor suppressor                                                                                                                                                                   | Lats1           |  |
| 1460265_at   | 0.73835 | Proliferation-associated 2G4                                                                                                                                                             | Pa2g4           |  |
| 1460266_at   | 1.02696 | RIKEN cDNA 1700094J05 gene                                                                                                                                                               | 1700094J05Rik   |  |
| 1460267_at   | 0.95279 | doublesex and mab-3 related transcription factor 3                                                                                                                                       | Dmrt3           |  |
| 1460268_at   | 0.93559 | ---                                                                                                                                                                                      | ---             |  |
| 1460269_at   | 1.00071 | Phenylethanolamine-N-methyltransferase                                                                                                                                                   | Pnmt            |  |
| 1460271_at   | 1.11365 | triggering receptor expressed on myeloid cells 3                                                                                                                                         | Trem3           |  |
| 1460272_at   | 0.98981 | ubiquitin-like 4B                                                                                                                                                                        | Ubl4b           |  |
| 1460273_a_at | 1.19057 | baculoviral IAP repeat-containing 1b                                                                                                                                                     | Birc1b          |  |
| 1460274_at   | 0.97818 | RIKEN cDNA 4921530G04 gene                                                                                                                                                               | 4921530G04Rik   |  |
| 1460275_at   | 0.99735 | G-protein coupled receptor 3                                                                                                                                                             | Gpr3            |  |
| 1460276_a_at | 0.98593 | G protein-coupled receptor 175                                                                                                                                                           | Gpr175          |  |
| 1460277_at   | 0.92866 | diencephalon/mesencephalon homeobox 1                                                                                                                                                    | Dmbx1           |  |
| 1460278_a_at | 0.98844 | "DNA segment, Chr 15, Wayne State University 75, expressed"                                                                                                                              | D15Wsu75e       |  |
| 1460279_a_at | 0.87938 | general transcription factor II I /// similar to General transcription factor II-I (GTFII-I) (TFII-I) (Bruton tyrosine kinase-associated protein 135) (BTK-associated protein 135) (BAP- |                 |  |

## 135) Gtf2i /// LOC669007

1460280\_at 0.92250 GRB2-related adaptor protein 2 /// similar to GRB2-related adaptor protein 2 (GADS protein) (Growth factor receptor binding protein) (GRBLG) (GRB-2-like protein) (GRB2L) (Hematopoietic cell-associated adaptor protein GrpL) (GRB-2-related monocytic adapter protein) (Monocytic adapter... Grap2 /// LOC674050

1460281\_at 1.04567 ankyrin repeat and SOCS box-containing protein 15 Asb15

1460282\_at 1.09693 triggering receptor expressed on myeloid cells 1 Trem1

1460283\_at 1.03256 Mediterranean fever Mefv

1460284\_at 0.79413 leucine zipper-EF-hand containing transmembrane protein 1 Letm1

1460285\_at 1.12086 integrin alpha 9 Itga9

1460286\_at 0.97945 septin 6 6-Sep

1460287\_at 0.91558 tissue inhibitor of metalloproteinase 2 Timp2

1460288\_a\_at 0.97413 "protein phosphatase 4, catalytic subunit" Ppp4c

1460289\_at 1.02892 neuregulin 3 Nrg3

1460290\_at 1.25882 lipin 2 Lpin2

1460291\_at 1.32932 cyclin-dependent kinase 6 Cdk6

1460292\_a\_at 0.71418 "SWI/SNF related, matrix associated, actin dependent regulator of chromatin, subfamily a, member 1" Smarca1

1460293\_at 0.98553 frequenin homolog (Drosophila) Freq

1460294\_at 1.36026 "ATPase, aminophospholipid transporter-like, class I, type 8A, member 2" Atp8a2

1460295\_s\_at 1.00687 interleukin 6 signal transducer Il6st

1460296\_a\_at 0.96027 fibroblast growth factor 22 Fgf22

1460297\_at 1.06001 "nephrosis 2 homolog, podocin (human)" Nphs2

1460298\_at 0.96445 RIKEN cDNA 4930483J18 gene 4930483J18Rik

1460299\_at 0.90906 homeobox gene HB9 Hlxb9

1460300\_a\_at 0.86812 leukocyte tyrosine kinase Ltk

1460301\_at 0.92333 "vomeronasal 1 receptor, D2" V1rd2

1460302\_at 0.77422 thrombospondin 1 /// similar to thrombospondin 1 Thbs1 /// LOC640441

1460303\_at 0.91612 "nuclear receptor subfamily 3, group C, member 1" Nr3c1

1460304\_a\_at 0.92001 "upstream binding transcription factor, RNA polymerase I" Ubtf

1460305\_at 0.91897 integrin alpha 3 Itga3

1460306\_at 0.95632 myocilin Myoc

1460307\_at 0.90915 thymoma viral proto-oncogene 3 Akt3

1460308\_a\_at 1.06299 immature colon carcinoma transcript 1 Ict1

1460309\_at 1.08424 T-cell acute lymphocytic leukemia 2 Tal2

1460310\_a\_at 1.03689 growth hormone Gh

1460311\_at 0.97978 simple repeat sequence-containing transcript Srst

1460312\_at 0.95216 olfactory receptor 157 Olfr157

1460313\_at 0.96859 olfactory receptor 2 Olfr2

1460314\_s\_at 1.20938 "histone 2, H3c1 /// histone 2, H3c2 /// histone 1, H3g /// histone 1, H3f /// histone 1, H3c /// histone 1, H3d /// histone 1, H3b /// histone 1, H3e /// histone 1, H3h /// histone 1, H3i /// histone 2, H3b /// histone 1, H3a" Hist2h3c1 /// Hist2h3c2 /// Hist1h3g /// Hist1h3f ///

Hist1h3c /// Hist1h3d /// Hist1h3b /// Hist1h3e /// Hist1h3h /// Hist1h3i /// Hist2h3b /// Hist1h3a  
 1460315\_s\_at 1.03235 TANK-binding kinase 1 Tbk1  
 1460316\_at 0.92993 acyl-CoA synthetase long-chain family member 1 Acs11  
 1460317\_s\_at 1.09684 "guanine nucleotide binding protein, alpha 13" Gna13  
 1460318\_at 1.19402 cysteine and glycine-rich protein 3 Csrp3  
 1460319\_at 0.95129 fucosyltransferase 8 Fut8  
 1460320\_at 0.99398 "beclin 1 (coiled-coil, myosin-like BCL2-interacting protein)" Becn1  
 1460321\_at 0.90725 contactin 4 Cntn4  
 1460322\_at 1.01444 carbohydrate (chondroitin 6/keratan) sulfotransferase 3 Chst3  
 1460323\_at 1.28005 threonyl-tRNA synthetase Tars  
 1460324\_at 0.61142 DNA methyltransferase 3A Dnmt3a  
 1460325\_at 1.04832 pumilio 1 (Drosophila) Pum1  
 1460326\_at 0.96978 "phosphatidylinositol 3-kinase, catalytic, alpha polypeptide" Pik3ca  
 1460327\_at 0.90115 G-protein coupled receptor 88 Gpr88  
 1460328\_at 0.99678 bromodomain containing 3 Brd3  
 1460329\_at 1.14043 "similar to Beta-1,4-galactosyltransferase 6 (Beta-1,4-GalTase 6) (Beta4Gal-T6) (b4Gal-T6) (UDP-galactose:beta-N-acetylglucosamine beta-1,4-galactosyltransferase 6) (UDP-Gal:beta-GlcNAc beta-1,4-galactosyltransferase 6)" LOC675709  
 1460330\_at 1.04584 annexin A3 Anxa3  
 1460331\_at 0.94138 transmembrane 9 superfamily member 2 Tm9sf2  
 1460332\_at 1.07785 phospholamban Pln  
 1460333\_at 1.04538 DEAD (Asp-Glu-Ala-Asp) box polypeptide 59 Ddx59  
 1460334\_at 1.11177 drebrin-like Dbnl  
 1460335\_at 1.02483 "LysM, putative peptidoglycan-binding, domain containing 3" Lysmd3  
 1460336\_at 0.73310 "peroxisome proliferative activated receptor, gamma, coactivator 1 alpha" Ppargc1a  
 1460337\_at 0.73244 SH3-domain kinase binding protein 1 Sh3kbp1  
 1460338\_a\_at 1.12708 cytokine receptor-like factor 3 Crlf3  
 1460339\_at 1.09118 "proteasome (prosome, macropain) subunit, alpha type 4" Psma4  
 1460340\_at 0.95967 piwi-like homolog 1 (Drosophila) Piwil1  
 1460341\_at 0.94006 "pleckstrin homology domain containing, family B (evectins) member 2" Plekhh2  
 1460342\_s\_at 0.89619 expressed sequence AA536749 AA536749  
 1460343\_at 0.89296 neuralized-like homolog (Drosophila) Neurl  
 1460344\_at 0.88171 RIKEN cDNA 2310033F14 gene 2310033F14Rik  
 1460345\_at 1.06616 RIKEN cDNA 2610208M17 gene 2610208M17Rik  
 1460346\_at 1.01665 arylsulfatase A Arsa  
 1460347\_at 1.15832 keratin 14 Krt14  
 1460348\_at 0.92847 MAD2 mitotic arrest deficient-like 2 (yeast) Mad2l2  
 1460349\_at 0.89190 proline rich 14 Prr14  
 1460350\_at 0.99937 oxysterol binding protein Osbp  
 1460351\_at 0.99833 S100 calcium binding protein A11 (calizzarin) S100a11  
 1460352\_s\_at 0.92968 "phosphatidylinositol 3 kinase, regulatory subunit, polypeptide 4, p150"

## Pik3r4

1460353\_at 0.85358 transmembrane protein 48 Tmem48  
 1460354\_a\_at 0.98967 mitochondrial ribosomal protein L13 Mrp13  
 1460355\_at 0.97052 BUD13 homolog (yeast) Bud13  
 1460356\_at 0.79958 endothelial cell-specific adhesion molecule Esam1  
 1460357\_at 0.97787 YTH domain family 2 Ythdf2  
 1460358\_s\_at 0.93619 nudix (nucleoside diphosphate linked moiety X)-type motif 22 Nudt22  
 1460359\_at 1.01145 "armadillo repeat containing, X-linked 3" Armcx3  
 1460360\_at 0.90853 asparaginase like 1 Asrg11  
 1460361\_at 0.94326 RIKEN cDNA 5033414D02 gene 5033414D02Rik  
 1460362\_at 0.99564 RIKEN cDNA 2410001C21 gene 2410001C21Rik  
 1460363\_at 0.94525 trinucleotide repeat containing 6C Tnrc6c  
 1460364\_at 1.09496 general transcription factor II I repeat domain-containing 1 Gtf2ird1  
 1460365\_a\_at 0.99465 dynamin 1 Dnm1  
 1460366\_at 0.99672 echinoderm microtubule associated protein like 3 Eml3  
 1460367\_at 0.86053 high mobility group box transcription factor 1 Hbp1  
 1460368\_at 1.00004 "membrane protein, palmitoylated 4 (MAGUK p55 subfamily member 4)"

## Mpp4

1460369\_at 0.95949 cDNA sequence BC003267 BC003267  
 1460370\_at 1.06715 "DNA topoisomerase 1, mitochondrial" Top1mt  
 1460371\_at 1.05336 heat shock protein 12B Hspa12b  
 1460372\_at 0.92951 dual oxidase maturation factor 1 Duoxa1  
 1460373\_a\_at 0.96986 SET domain containing 4 Setd4  
 1460374\_at 0.94584 a disintegrin and metallopeptidase domain 2 Adam2  
 1460375\_at 1.11086 RIKEN cDNA 0610038D11 gene 0610038D11Rik  
 1460376\_a\_at 0.98965 "COX15 homolog, cytochrome c oxidase assembly protein (yeast)" Cox15  
 1460377\_a\_at 1.00366 transmembrane protein 8 (five membrane-spanning domains) Tmem8  
 1460378\_a\_at 1.01608 testis derived transcript Tes  
 1460379\_at 1.07103 homeo box B4 Hoxb4  
 1460380\_at 0.86081 desmoglein 2 Dsg2  
 1460381\_at 1.00983 cDNA sequence BC023179 BC023179  
 1460382\_at 0.95119 cDNA sequence BC020535 BC020535  
 1460383\_at 0.95726 "guanine nucleotide binding protein, alpha o" Gnao1  
 1460384\_a\_at 0.95872 AT rich interactive domain 4B (Rbp1 like) Arid4b  
 1460385\_a\_at 0.96598 zinc finger protein 179 Zfp179  
 1460386\_a\_at 1.08138 "solute carrier family 1 (neuronal/epithelial high affinity glutamate transporter, system Xag), member 1" Slc1a1  
 1460387\_a\_at 0.87287 sialic acid acetyltransferase Siae  
 1460388\_at 0.96045 RIKEN cDNA 4632408A20 gene 4632408A20Rik  
 1460389\_at 1.05828 cyclin-dependent kinase 8 Cdk8  
 1460390\_at 0.92465 "sortilin-related receptor, LDLR class A repeats-containing" Sorl1  
 1460391\_at 1.06567 RIKEN cDNA 2810409H07 gene 2810409H07Rik  
 1460392\_a\_at 1.08752 enhancer of yellow 2 homolog (Drosophila) Eny2

1460393\_a\_at 0.98366 dual specificity phosphatase 7 /// similar to dual specificity phosphatase 7  
 Dusp7 /// LOC674944  
 1460394\_a\_at 0.97771 inositol polyphosphate phosphatase-like 1 Inpp1  
 1460395\_at 1.07992 NudC domain containing 3 Nudcd3  
 1460396\_at 1.09154 DEAD (Asp-Glu-Ala-Asp) box polypeptide 54 Ddx54  
 1460397\_at 0.99395 armadillo repeat containing 6 Armc6  
 1460398\_at 0.95021 PHD finger protein 8 Phf8  
 1460399\_at 0.99594 coiled-coil domain containing 117 Ccdc117  
 1460400\_at 1.01640 spastin Spast  
 1460401\_at 0.92443 "ER degradation enhancer, mannosidase alpha-like 3" Edem3  
 1460402\_at 0.97523 "bromodomain and PHD finger containing, 1" Brpf1  
 1460403\_at 0.96302 PC4 and SFRS1 interacting protein 1 Psip1  
 1460404\_at 1.08522 stretch responsive protein 278 Sr278  
 1460405\_at 1.01650 Rho guanine nucleotide exchange factor (GEF) 10-like Arhgef10  
 1460406\_at 1.00913 expressed sequence AI427122 AI427122  
 1460407\_at 1.21206 Spi-B transcription factor (Spi-1/PU.1 related) Spib  
 1460408\_at 0.99186 "gamma-aminobutyric acid (GABA-A) receptor, subunit gamma 1" Gabrg1  
 1460409\_at 0.79520 "carnitine palmitoyltransferase 1a, liver" Cpt1a  
 1460410\_at 1.01181 RIKEN cDNA 2310079F23 gene 2310079F23Rik  
 1460411\_s\_at 1.03061 expressed sequence AW548124 AW548124  
 1460412\_at 0.91978 RIKEN cDNA 1600015H20 gene 1600015H20Rik  
 1460413\_s\_at 0.83118 "zinc finger, DHHC domain containing 1" Zdhhc1  
 1460414\_at 0.91891 expressed sequence AW822216 AW822216  
 1460415\_a\_at 0.99901 CD40 antigen Cd40  
 1460416\_s\_at 0.96854 component of Sp100-rs /// similar to component of Sp100-rs /// similar to  
 component of Sp100-rs /// similar to component of Sp100-rs /// similar to component of Sp100-  
 rs /// similar to component of Sp100-rs /// similar to component of Sp100-rs /// similar to component of Sp100-  
 rs /// similar to component of Sp100-rs /// similar to component of Sp100-rs Csprs /// Sp100-rs ///  
 LOC665338 /// LOC665378 /// LOC673105 /// LOC673206 /// LOC673671 /// LOC673849 ///  
 LOC673925 /// LOC673997  
 1460417\_at 1.16825 cDNA sequence AB041803 AB041803  
 1460418\_x\_at 0.95749 "histocompatibility 2, T region locus 18" H2-T18  
 1460419\_a\_at 0.95339 "protein kinase C, beta 1" Prkcb1  
 1460420\_a\_at 1.02629 epidermal growth factor receptor Egfr  
 1460421\_at 0.98945 zinc finger protein 133 Zfp133  
 1460422\_at 0.96120 "DNA segment, KIST 5" D0Kist5  
 1460423\_x\_at 0.99834 immunoglobulin heavy chain (V7183 family) /// immunoglobulin kappa chain  
 variable 1 (V1) /// immunoglobulin kappa chain variable 1-117 /// Ig kappa chain Igh-V7183 /// Igk-  
 V1 /// Igkv1-117 /// Cr1  
 1460424\_at 1.14540 transmembrane protein 160 Tmem160  
 1460425\_at 0.88627 RIKEN cDNA 1700001C19 gene 1700001C19Rik  
 1460426\_at 0.79822 phosphodiesterase 4D interacting protein (myomegalin) Pde4dip  
 1460427\_a\_at 1.07547 a disintegrin and metallopeptidase domain 28 Adam28

1460428\_at 0.96581 ankyrin repeat domain 13a Ankrd13a  
1460429\_at 1.00906 cell division cycle 5-like (*S. pombe*) Cdc5l  
1460430\_at 1.00130 "RAP2C, member of RAS oncogene family" Rap2c  
1460431\_at 0.91440 "glucosaminyl (N-acetyl) transferase 1, core 2" Gcnt1  
1460432\_a\_at 1.02345 "eukaryotic translation initiation factor 3, subunit 6" Eif3s6  
1460433\_at 0.99564 ectonucleoside triphosphate diphosphohydrolase 6 Entpd6  
1460434\_at 1.09495 FUN14 domain containing 2 Fundc2  
1460435\_at 0.98296 RIKEN cDNA 1500002O20 gene 1500002O20Rik  
1460436\_at 0.95209 N-deacetylase/N-sulfotransferase (heparan glucosaminyl) 1 Ndst1  
1460437\_at 0.99334 "pleckstrin homology, Sec7 and coiled/coil domains 4" Pscd4  
1460438\_at 0.92826 "LysM, putative peptidoglycan-binding, domain containing 1" Lysmd1  
1460439\_at 1.09480 cDNA sequence BC033915 BC033915  
1460440\_at 0.79115 latrophilin 3 Lphn3  
1460441\_at 0.97056 similar to Zinc finger X-linked protein ZXDB LOC668166  
1460442\_at 1.08476 ribosomal protein S19 Rps19  
1460443\_at 1.05100 breast cancer metastasis-suppressor 1-like Brms1l  
1460444\_at 0.79032 "arrestin, beta 1" Arrb1  
1460445\_at 0.98938 "splicing factor, arginine/serine-rich 2, interacting protein" Sfrs2ip  
1460446\_at 1.03449 tryptophan rich basic protein Wrb  
1460447\_at 1.10477 pseudouridylate synthase 7 homolog (*S. cerevisiae*)-like Pus7l  
1460448\_s\_at 1.01414 tetratricopeptide repeat domain 14 Ttc14  
1460449\_at 1.05490 ankyrin repeat and sterile alpha motif domain containing 1B /// similar to AIDA-1b Anks1b /// LOC544718  
1460450\_at 0.95494 RIKEN cDNA E230022H04 gene E230022H04Rik  
1460451\_at 1.01684 transmembrane protein 52 Tmem52  
1460452\_at 0.95746 motile sperm domain containing 3 Mospd3  
1460453\_at 1.07797 T-cell activation Rho GTPase-activating protein Tagap  
1460454\_at 1.04531 RIKEN cDNA 2010001H14 gene 2010001H14Rik  
1460455\_at 0.91961 RIKEN cDNA 1110059H15 gene 1110059H15Rik  
1460456\_at 1.02313 RIKEN cDNA 2010316F05 gene 2010316F05Rik  
1460457\_at 0.98888 RIKEN cDNA 2810405F17 gene 2810405F17Rik  
1460458\_at 0.91988 cysteine-rich secretory protein LCCL domain containing 2 Crisp1d2  
1460459\_at 0.90767 progesterin and adipoQ receptor family member V Paqr5  
1460460\_a\_at 0.91403 golgi reassembly stacking protein 2 Gorasp2  
1460461\_at 0.97979 RIKEN cDNA 4921521K07 gene 4921521K07Rik  
1460462\_at 0.93399 "mediator of RNA polymerase II transcription, subunit 18 homolog (yeast)" Med18  
1460463\_at 1.02898 RIKEN cDNA 4632413I24 gene 4632413I24Rik  
1460464\_at 0.89325 RIKEN cDNA 2700089E24 gene 2700089E24Rik  
1460465\_at 0.68287 RIKEN cDNA A930038C07 gene A930038C07Rik  
1460466\_at 1.20570 RIKEN cDNA 1700047I17 gene /// similar to signal recognition particle 54 1700047I17Rik /// LOC665155  
1460467\_at 0.97974 IQ motif containing G Iqcg

1460468\_s\_at 0.91042 RIKEN cDNA 2810451A06 gene 2810451A06Rik  
1460469\_at 1.50378 "tumor necrosis factor receptor superfamily, member 9" Tnfrsf9  
1460470\_at 1.15755 acyl-Coenzyme A oxidase-like Acox1  
1460471\_at 0.97245 RIKEN cDNA 2410146L05 gene 2410146L05Rik  
1460472\_at 0.92696 cyclin-dependent kinase 3 Cdk3  
1460473\_at 0.86266 RIKEN cDNA 6230400D17 gene 6230400D17Rik  
1460474\_at 1.46753 RIKEN cDNA 2610028L16 gene 2610028L16Rik  
1460475\_at 0.91977 RIKEN cDNA 3110056J03 gene 3110056J03Rik  
1460476\_s\_at 0.94371 RIKEN cDNA 1200015N20 gene 1200015N20Rik  
1460477\_at 1.01286 RIKEN cDNA 1700010C24 gene 1700010C24Rik  
1460478\_at 0.97540 RIKEN cDNA 2200002J24 gene 2200002J24Rik  
1460479\_at 0.84992 RIKEN cDNA A330094K24 gene A330094K24Rik  
1460480\_at 1.00547 RIKEN cDNA 1600014E20 gene 1600014E20Rik  
1460481\_at 1.10449 --- ---  
1460482\_at 1.08106 RIKEN cDNA 3110047P20 gene 3110047P20Rik  
1460483\_at 1.14228 RIKEN cDNA 2610034E01 gene 2610034E01Rik  
1460484\_at 0.99070 tubulin tyrosine ligase Ttl  
1460485\_at 0.90827 RIKEN cDNA 8430434A19 gene 8430434A19Rik  
1460486\_at 0.91462 RAB GTPase activating protein 1 Rabgap1  
1460487\_at 1.00457 RIKEN cDNA 1110014L15 gene 1110014L15Rik  
1460488\_at 0.84001 zinc finger and BTB domain containing 4 Zbtb4  
1460489\_at 0.88696 RIKEN cDNA 1700097M23 gene 1700097M23Rik  
1460490\_at 1.00469 mitochondrial ribosomal protein L15 Mrpl15  
1460491\_at 1.09240 inversin Invs  
1460492\_at 0.99540 RIKEN cDNA 8030498B09 gene 8030498B09Rik  
1460493\_at 0.96206 RIKEN cDNA 4921506J03 gene 4921506J03Rik  
1460494\_at 0.94721 "tubulin tyrosine ligase-like family, member 10" Ttl10  
1460495\_s\_at 1.24135 HtrA serine peptidase 2 Htra2  
1460496\_at 1.02477 similar to RIKEN cDNA 5430413K10 LOC433492  
1460497\_a\_at 0.92250 RIKEN cDNA 4933413B09 gene 4933413B09Rik  
1460498\_a\_at 1.22825 "DnaJ (Hsp40) homolog, subfamily C, member 5" Dnajc5  
1460499\_at 1.17478 RIKEN cDNA 9230110I02 gene 9230110I02Rik  
1460500\_at 1.19585 RIKEN cDNA 5033421C21 gene 5033421C21Rik  
1460501\_at 1.00860 RIKEN cDNA 4930521G14 gene 4930521G14Rik  
1460502\_at 0.95916 RIKEN cDNA 2010007E15 gene 2010007E15Rik  
1460503\_at 0.92581 zona pellucida binding protein 2 Zpbp2  
1460504\_at 0.94637 --- ---  
1460505\_at 0.92959 RIKEN cDNA 8030442B05 gene 8030442B05Rik  
1460506\_s\_at 1.03213 "NADH dehydrogenase (ubiquinone) 1, subcomplex unknown, 2 /// similar to NADH dehydrogenase (ubiquinone) 1, subcomplex unknown, 2" Ndufc2 /// LOC675851  
1460507\_at 0.92406 RIKEN cDNA 4930552P12 gene 4930552P12Rik  
1460508\_at 0.97851 mitochondrial ribosomal protein L1 Mrpl1  
1460509\_at 0.97748 "UDP-Gal:betaGlcNAc beta 1,3-galactosyltransferase, polypeptide 1"

B3galt1

1460510\_a\_at 0.94978 coenzyme Q10 homolog B (*S. cerevisiae*) Coq10b

1460511\_at 1.47650 plakophilin 2 Pkp2

1460512\_a\_at 0.77555 RIKEN cDNA 4930558O21 gene 4930558O21Rik

1460513\_a\_at 1.09032 endothelin receptor type A Ednra

1460514\_s\_at 0.97266 achaete-scute complex homolog-like 2 (*Drosophila*) Ascl2

1460515\_at 0.85219 RIKEN cDNA 8430419K02 gene 8430419K02Rik

1460516\_at 1.23989 RIKEN cDNA 3110006I21 gene 3110006I21Rik

1460517\_at 1.00440 RIKEN cDNA 9130409J20 gene 9130409J20Rik

1460518\_at 0.88767 RIKEN cDNA E130119H09 gene E130119H09Rik

1460519\_a\_at 1.03509 methyltransferase like 5 Mettl5

1460520\_at 0.94311 molybdenum cofactor synthesis 1 Mocs1

1460521\_a\_at 1.26020 RIKEN cDNA 5830411E10 gene 5830411E10Rik

1460522\_at 0.91459 RIKEN cDNA 6030458E02 gene 6030458E02Rik

1460523\_at 0.91949 --- ---

1460524\_at 0.97392 RIKEN cDNA 6430711C07 gene 6430711C07Rik

1460525\_at 1.01196 RIKEN cDNA 2810047J09 gene 2810047J09Rik

1460526\_at 1.27799 RIKEN cDNA 4833420L08 gene 4833420L08Rik

1460527\_at 0.89633 RIKEN cDNA 4933407C09 gene 4933407C09Rik

1460528\_at 0.98637 RIKEN cDNA 4930413G21 gene /// hypothetical protein LOC668574 ///  
 hypothetical protein LOC670667 /// hypothetical protein LOC676722 4930413G21Rik ///  
 LOC668574 /// LOC670667 /// LOC676722

1460529\_at 1.02925 RIKEN cDNA 4930455M05 gene 4930455M05Rik

1460530\_at 1.05059 RIKEN cDNA 4933416A02 gene 4933416A02Rik

1460531\_at 0.96290 RIKEN cDNA 2900069M18 gene 2900069M18Rik

1460532\_at 0.91771 RIKEN cDNA 2900011F02 gene 2900011F02Rik

1460533\_at 0.91865 RIKEN cDNA 4933440K10 gene 4933440K10Rik

1460534\_at 0.97011 RIKEN cDNA 5530401A10 gene 5530401A10Rik

1460535\_at 1.22960 "golgi autoantigen, golgin subfamily b, macrogolgin 1" Golgb1

1460536\_at 1.30107 RIKEN cDNA 2310079F09 gene 2310079F09Rik

1460537\_at 0.99891 RIKEN cDNA 9430085L16 gene 9430085L16Rik

1460538\_at 1.05971 cadherin 10 Cdh10

1460539\_at 1.03597 RIKEN cDNA 4933404K13 gene 4933404K13Rik

1460540\_at 0.94446 neurexin I Nrxn1

1460541\_at 1.07779 "solute carrier family 7 (cationic amino acid transporter, y+ system), member 6" Slc7a6

1460542\_s\_at 1.01398 transformed mouse 3T3 cell double minute 4 Mdm4

1460543\_x\_at 0.96248 ribosomal protein L37a Rpl37a

1460544\_at 0.95570 "MAK10 homolog, amino-acid N-acetyltransferase subunit, (*S. cerevisiae*)"  
 Mak10

1460545\_at 0.95518 thyroid hormone receptor associated protein 3 Thrap3

1460546\_at 1.01153 "leucine-rich repeat LGI family, member 3" Lgi3

1460547\_a\_at 0.98830 heterogeneous nuclear ribonucleoprotein K Hnrpk



1460548\_a\_at 0.96939 Era (G-protein)-like 1 (E. coli) Eral1  
1460549\_a\_at 0.99383 "CDC23 (cell division cycle 23, yeast, homolog)" Cdc23  
1460550\_at 0.93750 myotubularin related protein 11 Mtmr11  
1460551\_at 1.02815 "RAN, member RAS oncogene family" Ran  
1460552\_at 0.95595 activating signal cointegrator 1 complex subunit 3-like 1 Ascc311  
1460553\_at 0.87311 RIKEN cDNA 1700025K23 gene 1700025K23Rik  
1460554\_s\_at 0.88877 golgi apparatus protein 1 Glg1  
1460555\_at 0.89495 RIKEN cDNA 6330500D04 gene 6330500D04Rik  
1460556\_at 0.89889 --- ---  
1460557\_at 1.06664 "suppressor of var1, 3-like 1 (S. cerevisiae)" Supv311  
1460558\_at 0.85183 coiled-coil domain containing 32 Ccdc32  
1460559\_at 1.04535 ankyrin repeat domain 25 Ankrd25  
1460560\_at 0.98043 BAH domain and coiled-coil containing 1 Bahcc1  
1460561\_x\_at 0.75482 "selenoprotein W, muscle 1" Sepw1  
1460562\_at 1.00565 elongation factor Tu GTP binding domain containing 1 Eftud1  
1460563\_at 1.06781 "DNA segment, Chr 10, ERATO Doi 438, expressed" D10Ert438e  
1460564\_at 1.05315 suppressor of hairy wing homolog 2 (Drosophila) Suhw2  
1460565\_at 0.94319 "solute carrier family 41, member 1" Slc41a1  
1460566\_at 0.88166 microtubule-associated protein 1 A Mtap1a  
1460567\_at 1.27225 regulatory factor X domain containing 2 homolog (human) Rfxdc2  
1460568\_at 1.16902 tripartite motif protein 46 Trim46  
1460569\_x\_at 0.96220 claudin 3 Cldn3  
1460570\_at 1.04653 piggyBac transposable element derived 5 Pgbd5  
1460571\_at 0.80597 "Dicer1, Dcr-1 homolog (Drosophila)" Dicer1  
1460572\_a\_at 1.00353 zinc finger protein 511 Zfp511  
1460573\_at 0.97136 expressed sequence AI848100 AI848100  
1460574\_at 0.62271 FAT tumor suppressor homolog 4 (Drosophila) Fat4  
1460575\_at 1.00892 eukaryotic translation initiation factor 2a Eif2a  
1460576\_at 0.97158 exocyst complex component 6 Exoc6  
1460577\_at 1.03466 Expressed sequence AA591059 AA591059  
1460578\_at 1.03916 "FYVE, RhoGEF and PH domain containing 5" Fgd5  
1460579\_at 1.05809 aspartyl aminopeptidase Dnpep  
1460580\_at 0.80015 pecanex homolog (Drosophila) Pcnx  
1460581\_a\_at 0.99101 ribosomal protein L13 /// similar to 60S ribosomal protein L13 Rpl13 /// LOC280047 /// LOC547376 /// LOC668182 /// LOC672281 /// LOC674921 /// LOC675192  
1460582\_x\_at 0.92281 Nonagouti a  
1460583\_at 0.92601 golgi transport 1 homolog B (S. cerevisiae) Golt1b  
1460584\_at 1.02955 histidine acid phosphatase domain containing 2A Hisppd2a  
1460585\_x\_at 0.93512 phosphatidylserine decarboxylase Pisd  
1460586\_at 1.07532 multiple EGF-like-domains 8 Megf8  
1460587\_at 1.04041 RIKEN cDNA B230215L15 gene B230215L15Rik

1460588\_at 1.07068 "10 days lactation, adult female mammary gland cDNA, RIKEN full-length enriched library, clone:D730013G10 product:unclassifiable, full insert sequence" ---  
1460589\_at 0.84544 zinc finger protein 597 Zfp597  
1460590\_s\_at 0.97146 "tyrosine 3-monooxygenase/tryptophan 5-monooxygenase activation protein, theta polypeptide" Ywhaq  
1460591\_at 0.85469 estrogen receptor 1 (alpha) Esr1  
1460592\_at 0.91632 erythrocyte protein band 4.1-like 1 Epb4.111  
1460593\_at 0.94342 sushi domain containing 4 Susd4  
1460594\_a\_at 0.97290 GDP-mannose pyrophosphorylase A Gmppa  
1460595\_at 1.03360 "16 days embryo head cDNA, RIKEN full-length enriched library, clone: C130021L12 product:unclassifiable, full insert sequence" ---  
1460596\_at 0.92534 "angiotensin II, type I receptor-associated protein" Agrap  
1460597\_at 1.19321 Additional sex combs like 2 (Drosophila) Asxl2  
1460598\_at 1.03351 interleukin 28 receptor alpha Il28ra  
1460599\_at 0.86199 "DNA segment, Chr 19, Wayne State University 12, expressed" D19Wsu12e  
1460600\_at 0.94063 similar to ubiquitin-conjugating enzyme E2Q (putative) 2 LOC245350  
1460601\_at 1.08968 myosin VIIA and Rab interacting protein Myrip  
1460602\_at 0.98318 deleted in liver cancer 1 Dlc1  
1460603\_at 1.10221 sterile alpha motif domain containing 9-like Samd9l  
1460604\_at 0.97236 cytochrome b reductase 1 Cybrd1  
1460605\_at 1.02936 Crx opposite strand transcript 1 Crxos1  
1460606\_at 1.05609 hydroxysteroid (17-beta) dehydrogenase 13 Hsd17b13  
1460607\_at 0.94444 "immunoglobulin superfamily, member 11" Igsf11  
1460608\_at 0.88799 "calcium channel, voltage-dependent, N type, alpha 1B subunit" Cacna1b  
1460609\_at 0.94046 Integrator complex subunit 8 Ints8  
1460610\_at 0.78945 RIKEN cDNA 9430057O19 gene 9430057O19Rik  
1460611\_at 0.98078 expressed sequence C87499 C87499  
1460612\_at 1.10759 RAN binding protein 3 Ranbp3  
1460613\_x\_at 0.98693 growth hormone Gh  
1460614\_at 0.83269 "mesoderm induction early response 1, family member 3" Mier3  
1460615\_at 1.02671 5'-nucleotidase domain containing 1 Nt5dc1  
1460616\_at 0.95959 "solute carrier organic anion transporter family, member 4C1" Slco4c1  
1460617\_s\_at 1.15179 "RAB6B, member RAS oncogene family" Rab6b  
1460618\_x\_at 0.97985 RIKEN cDNA 1700001J11 gene 1700001J11Rik  
1460619\_at 1.09426 RIKEN cDNA 4931419K03 gene 4931419K03Rik  
1460620\_at 0.80428 zinc finger protein 592 Zfp592  
1460621\_x\_at 0.89304 "tyrosine 3-monooxygenase/tryptophan 5-monooxygenase activation protein, theta polypeptide" Ywhaq  
1460622\_x\_at 1.21497 WD repeat domain 18 Wdr18  
1460623\_at 0.86727 src family associated phosphoprotein 2 Scap2  
1460624\_at 1.02257 RIKEN cDNA 6330564D18 gene 6330564D18Rik  
1460625\_at 1.01850 "gene model 1568, (NCBI)" Gm1568  
1460626\_at 1.05666 septin 11 11-Sep

1460627\_at 1.03234 RIKEN cDNA D130067I03 gene D130067I03Rik  
1460628\_at 1.03882 Mitogen-activated protein kinase 8 interacting protein 3 Mapk8ip3  
1460629\_at 0.97246 tripartite motif protein 16 Trim16  
1460630\_at 1.05130 "calcium/calmodulin-dependent protein kinase II, delta" Camk2d  
1460631\_at 1.03087 O-linked N-acetylglucosamine (GlcNAc) transferase (UDP-N-acetylglucosamine:polypeptide-N-acetylglucosaminyl transferase) Ogt  
1460632\_at 0.77896 --- ---  
1460633\_at 1.02588 PRP19/PSO4 pre-mRNA processing factor 19 homolog (S. cerevisiae) Prpf19  
1460634\_at 0.85779 ral guanine nucleotide dissociation stimulator Ralgds  
1460635\_at 0.88882 Fas-activated serine/threonine kinase Fastk  
1460636\_at 0.96192 mitogen activated protein kinase kinase 2 Map2k2  
1460637\_s\_at 0.93696 prefoldin 5 Pfdn5  
1460638\_at 1.07150 tyrosyl-tRNA synthetase Yars  
1460639\_a\_at 0.98614 ATX1 (antioxidant protein 1) homolog 1 (yeast) Atox1  
1460640\_at 0.99345 ATX1 (antioxidant protein 1) homolog 1 (yeast) Atox1  
1460641\_a\_at 0.85584 RIKEN cDNA 3100004P22 gene /// RIKEN cDNA 2310022K01 gene 3100004P22Rik /// 2310022K01Rik  
1460642\_at 0.94384 Tnf receptor associated factor 4 Traf4  
1460643\_at 0.96117 elongation factor RNA polymerase II Ell  
1460644\_at 0.98910 branched chain ketoacid dehydrogenase kinase Bckdk  
1460645\_at 0.94039 "cysteine and histidine-rich domain (CHORD)-containing, zinc-binding protein 1" Chordc1  
1460646\_at 0.98421 "casein kinase 2, alpha prime polypeptide" Csnk2a2  
1460647\_a\_at 0.83678 "nuclear receptor subfamily 2, group F, member 6" Nr2f6  
1460648\_at 0.89847 "nuclear receptor subfamily 2, group F, member 6" Nr2f6  
1460649\_at 1.12708 interleukin-1 receptor-associated kinase 1 Irak1  
1460650\_at 0.89474 "ATPase, H+ transporting, lysosomal V0 subunit A1" Atp6v0a1  
1460651\_at 1.04011 linker for activation of T cells Lat  
1460652\_at 0.94866 "estrogen related receptor, alpha" Esrra  
1460653\_at 1.01072 ataxin 2 Atxn2  
1460654\_at 1.02850 "solute carrier family 30 (zinc transporter), member 3" Slc30a3  
1460655\_a\_at 1.07179 upstream binding protein 1 Ubp1  
1460656\_a\_at 1.08095 RIKEN cDNA 5630401J11 gene 5630401J11Rik  
1460657\_at 1.12760 wingless related MMTV integration site 10a Wnt10a  
1460658\_at 0.97641 "Adaptor protein complex AP-1, gamma 1 subunit" Ap1g1  
1460659\_at 0.91126 "CDNA, clone:Y0G0114H22, strand:minus, reference:ENSEMBL:Mouse-Transcript-ENST:ENSMUST00000058552, based on BLAT search" ---  
1460660\_x\_at 0.94643 RER1 retention in endoplasmic reticulum 1 homolog (S. cerevisiae) Rer1  
1460661\_at 1.05698 "endothelial differentiation, sphingolipid G-protein-coupled receptor, 3" Edg3  
1460662\_at 0.93092 period homolog 3 (Drosophila) Per3  
1460663\_at 0.90689 cholecystokinin B receptor Cckbr

1460664\_at 0.91066 "zinc finger protein, subfamily 1A, 4 (Eos)" Zfpn1a4  
1460665\_a\_at 0.97932 "CCR4-NOT transcription complex, subunit 7" Cnot7  
1460666\_a\_at 1.03207 early B-cell factor 3 Ebf3  
1460667\_at 0.89971 cDNA sequence U90926 U90926  
1460668\_at 0.83932 galanin Gal  
1460669\_at 1.03154 interleukin enhancer binding factor 3 Ilf3  
1460670\_at 0.97828 RIO kinase 3 (yeast) Riok3  
1460671\_at 0.87787 glutathione peroxidase 1 Gpx1  
1460672\_at 1.03722 RIKEN cDNA 2410002F23 gene 2410002F23Rik  
1460673\_at 0.96345 foylypolyglutamyl synthetase Fpgs  
1460674\_at 0.83126 progesterin and adipoQ receptor family member VII Paqr7  
1460675\_at 0.84846 "immunoglobulin superfamily, member 8" Igsf8  
1460676\_at 0.97317 Josephin domain containing 1 Josd1  
1460677\_at 0.94553 --- ---  
1460678\_at 0.81706 kelch domain containing 2 Klhdc2  
1460679\_at 1.03553 exosome component 4 Exosc4  
1460680\_a\_at 1.04476 ribosomal protein L23 Rpl23  
1460681\_at 0.92310 CEA-related cell adhesion molecule 1 Ceacam1  
1460682\_s\_at 0.99327 CEA-related cell adhesion molecule 1 /// CEA-related cell adhesion molecule  
2 Ceacam1 /// Ceacam2  
1460683\_at 0.96662 TEA domain family member 4 Tead4  
1460684\_at 1.44284 transmembrane 7 superfamily member 2 Tm7sf2  
1460685\_at 1.13553 translocase of inner mitochondrial membrane 17b Timm17b  
1460686\_at 0.89193 cyclin N-terminal domain containing 1 Cntd1  
1460687\_at 1.03113 SET domain containing (lysine methyltransferase) 8 Setd8  
1460688\_s\_at 0.95679 expressed sequence AA407659 AA407659  
1460689\_at 1.00999 "DNA segment, Chr 15, Wayne State University 75, expressed" D15Wsu75e  
1460690\_at 0.92271 cDNA sequence BC003940 BC003940  
1460691\_at 1.10101 zinc finger protein 598 Zfp598  
1460692\_at 1.01269 euchromatic histone lysine N-methyltransferase 2 Ehmt2  
1460693\_a\_at 1.02342 "procollagen, type IX, alpha 3" Col9a3  
1460694\_s\_at 0.84188 supervillin Svil  
1460695\_a\_at 0.88930 RIKEN cDNA 2010111I01 gene 2010111I01Rik  
1460696\_at 0.98187 cDNA sequence BC026585 BC026585  
1460697\_s\_at 1.06143 RIKEN cDNA 2610209M04 gene 2610209M04Rik  
1460698\_a\_at 1.06961 Sec11-like 3 (S. cerevisiae) Sec113  
1460699\_at 1.05824 ribosomal protein S27 Rps27  
1460700\_at 1.05282 signal transducer and activator of transcription 3 Stat3  
1460701\_a\_at 0.98051 mitochondrial ribosomal protein L52 Mrpl52  
1460702\_at 1.05274 TP53 regulated inhibitor of apoptosis 1 Triap1  
1460703\_at 0.90448 activating signal cointegrator 1 complex subunit 1 Ascc1  
1460704\_at 1.03894 radical fringe gene homolog (Drosophila) Rfng  
1460705\_at 1.12530 "ribosomal protein S6 kinase, polypeptide 1" Rps6kb1

1460706\_s\_at 0.91702 RER1 retention in endoplasmic reticulum 1 homolog (S. cerevisiae) Rer1  
1460707\_at 1.07920 protein tyrosine phosphatase 4a2 Ptp4a2  
1460708\_s\_at 0.94856 cell division cycle 42 homolog (S. cerevisiae) Cdc42  
1460709\_a\_at 0.87084 HLA-B associated transcript 5 Bat5  
1460710\_at 0.94074 adenosine A2a receptor Adora2a  
1460711\_at 1.20865 RIKEN cDNA 4930461P20 gene 4930461P20Rik  
1460712\_s\_at 0.99701 "adaptor protein complex AP-1, gamma 1 subunit" Ap1g1  
1460713\_at 1.10430 cDNA sequence BC048355 BC048355  
1460714\_at 1.05416 Transcription factor CP2-like 1 Tcfcp211  
1460715\_x\_at 1.00043 Transcription factor CP2-like 1 Tcfcp211  
1460716\_a\_at 0.93578 core binding factor beta Cbfb  
1460717\_at 0.77780 "testis-specific protein, Y-encoded-like 1" Tspyl1  
1460718\_s\_at 0.93960 mitochondrial carrier homolog 1 (C. elegans) Mtch1  
1460719\_a\_at 1.19189 "purinergic receptor P2X, ligand-gated ion channel, 1" P2rx1  
1460720\_at 1.01451 "transient receptor potential cation channel, subfamily C, member 4 associated protein" Trpc4ap  
1460722\_at 0.98314 sterol O-acyltransferase 2 Soat2  
1460723\_at 1.18770 melanocortin 5 receptor Mc5r  
1460724\_at 1.04478 "adaptor protein complex AP-2, alpha 1 subunit" Ap2a1  
1460725\_at 1.03133 "xeroderma pigmentosum, complementation group A" Xpa  
1460726\_at 1.04044 "adenylosuccinate synthetase, non muscle" Adss  
1460727\_at 1.11886 "excision repair cross-complementing rodent repair deficiency, complementation group 2" Ercc2  
1460728\_s\_at 0.88043 "inhibitor of growth family, member 4" Ing4  
1460729\_at 0.92807 Rho-associated coiled-coil containing protein kinase 1 Rock1  
1460730\_at 1.02535 "eukaryotic translation initiation factor 2B, subunit 1 (alpha)" Eif2b1  
1460731\_at 1.04217 "solute carrier family 35, member C2" Slc35c2  
1460732\_a\_at 1.21989 periplakin Ppl  
1460733\_at 0.91260 expressed sequence AA407659 AA407659  
1460734\_at 0.94802 "procollagen, type IX, alpha 3" Col9a3  
1460735\_at 0.91450 supervillin Svl  
1460736\_at 0.96891 "similar to CG5514-PB, isoform B /// region containing expressed sequence AF013969; RIKEN cDNA A230054D04 gene" LOC665775 /// LOC675766  
1460737\_at 1.05426 immunoglobulin (CD79A) binding protein 1 Igbp1  
1460738\_at 0.82223 LIM domain containing 2 Limd2  
1460739\_at 0.86070 "DNA segment, Chr 11, Brigham & Women's Genetics 0280e expressed" D11Bwg0280e  
1460740\_at 0.93999 "clathrin, light polypeptide (Lcb)" Cltb  
1460741\_x\_at 1.01052 "DNA segment, Chr 17, Wayne State University 92, expressed" D17Wsu92e  
1460742\_at 1.04346 "asparagine-linked glycosylation 3 homolog (yeast, alpha-1,3-mannosyltransferase)" Alg3  
1460743\_at 0.95243 tigger transposable element derived 5 Tigd5  
1460744\_at 0.87689 RIKEN cDNA 2810002I04 gene 2810002I04Rik

|            |         |                            |               |
|------------|---------|----------------------------|---------------|
| 1460745_at | 0.95347 | RIKEN cDNA A630098A13 gene | A630098A13Rik |
| 1460746_at | 0.91760 | fidgetin-like 1 Fignl1     |               |
